# Supplementary material
Source: PubMed Central journal article supplement (PMC3399590)

# Drug 5FU, dose 0.1 (mM)

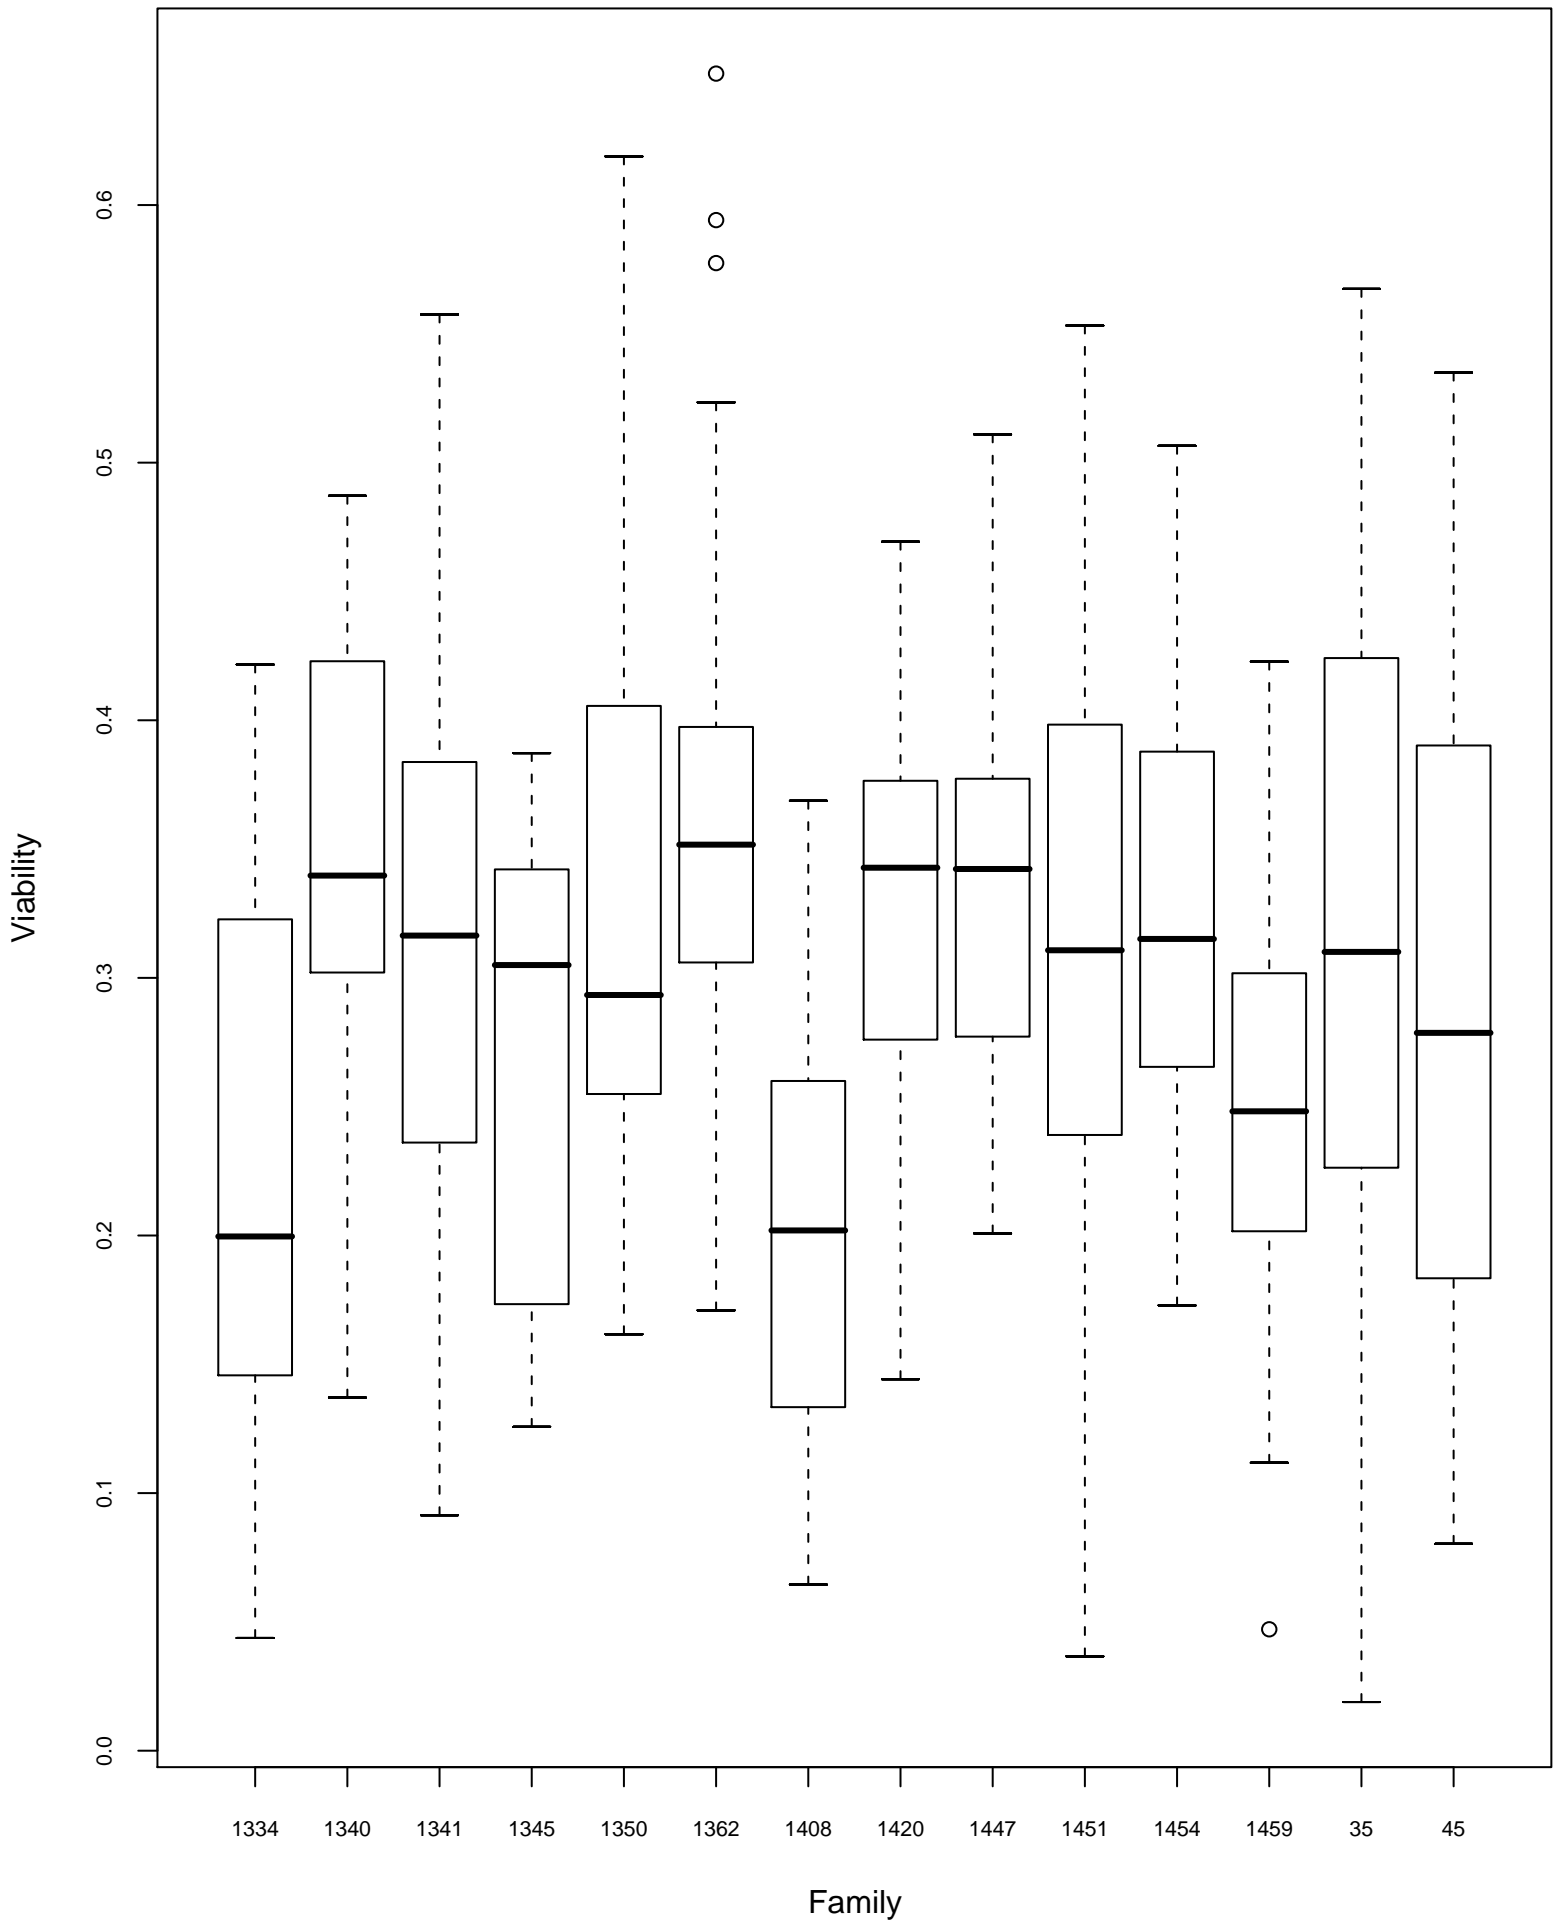

# Drug 5FU, dose 0.022222 (mM)

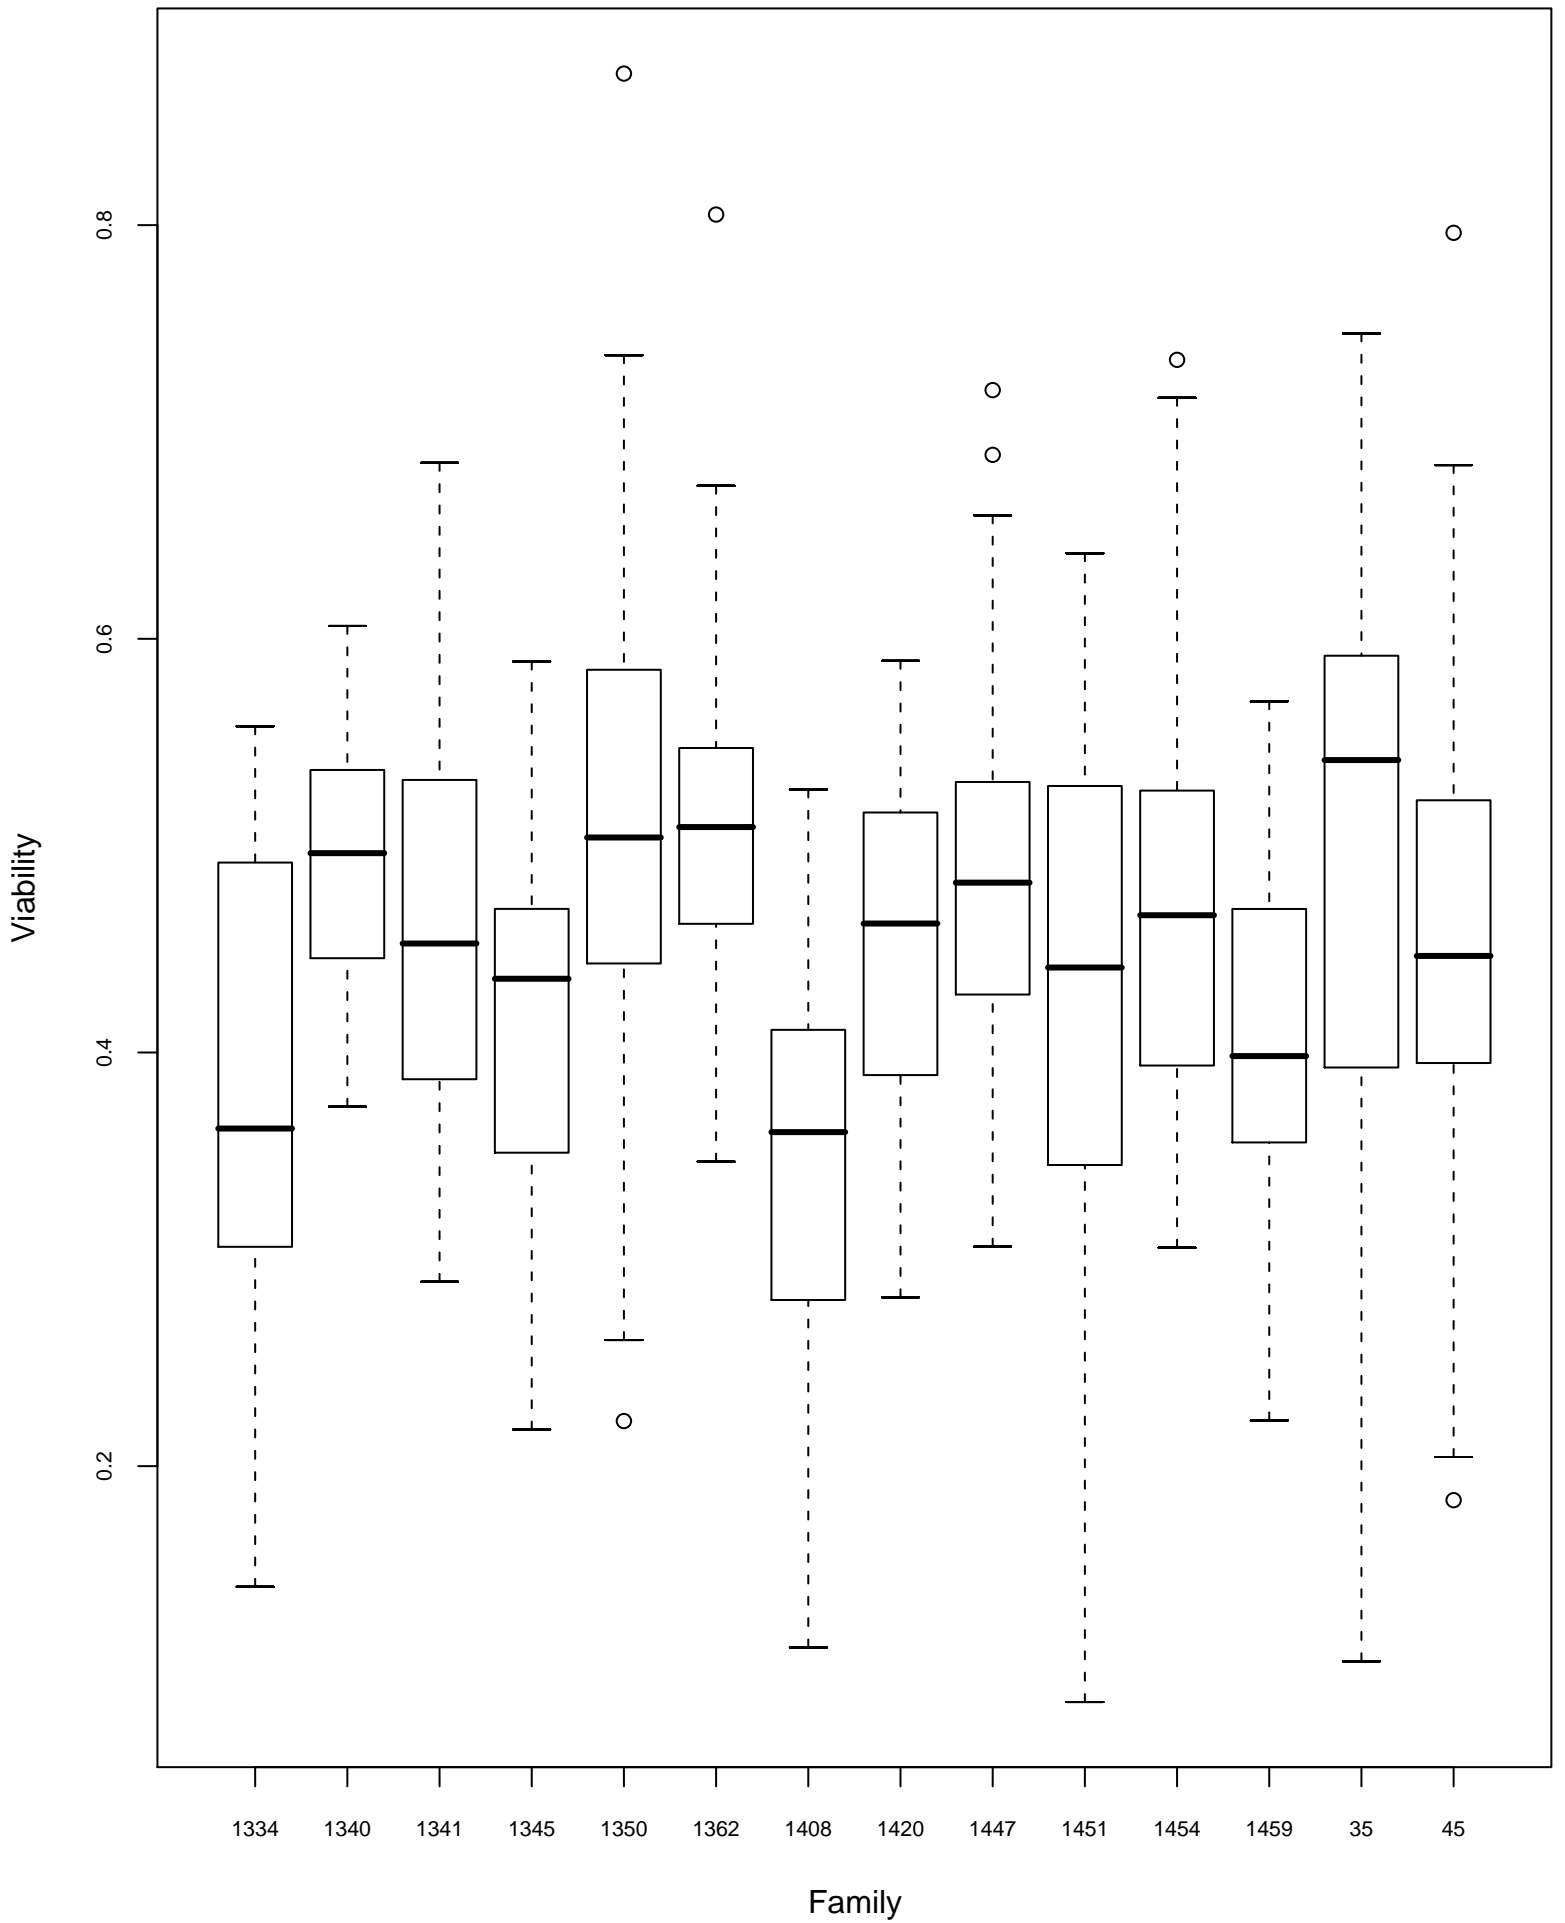

# Drug 5FU, dose 0.004938 (mM)

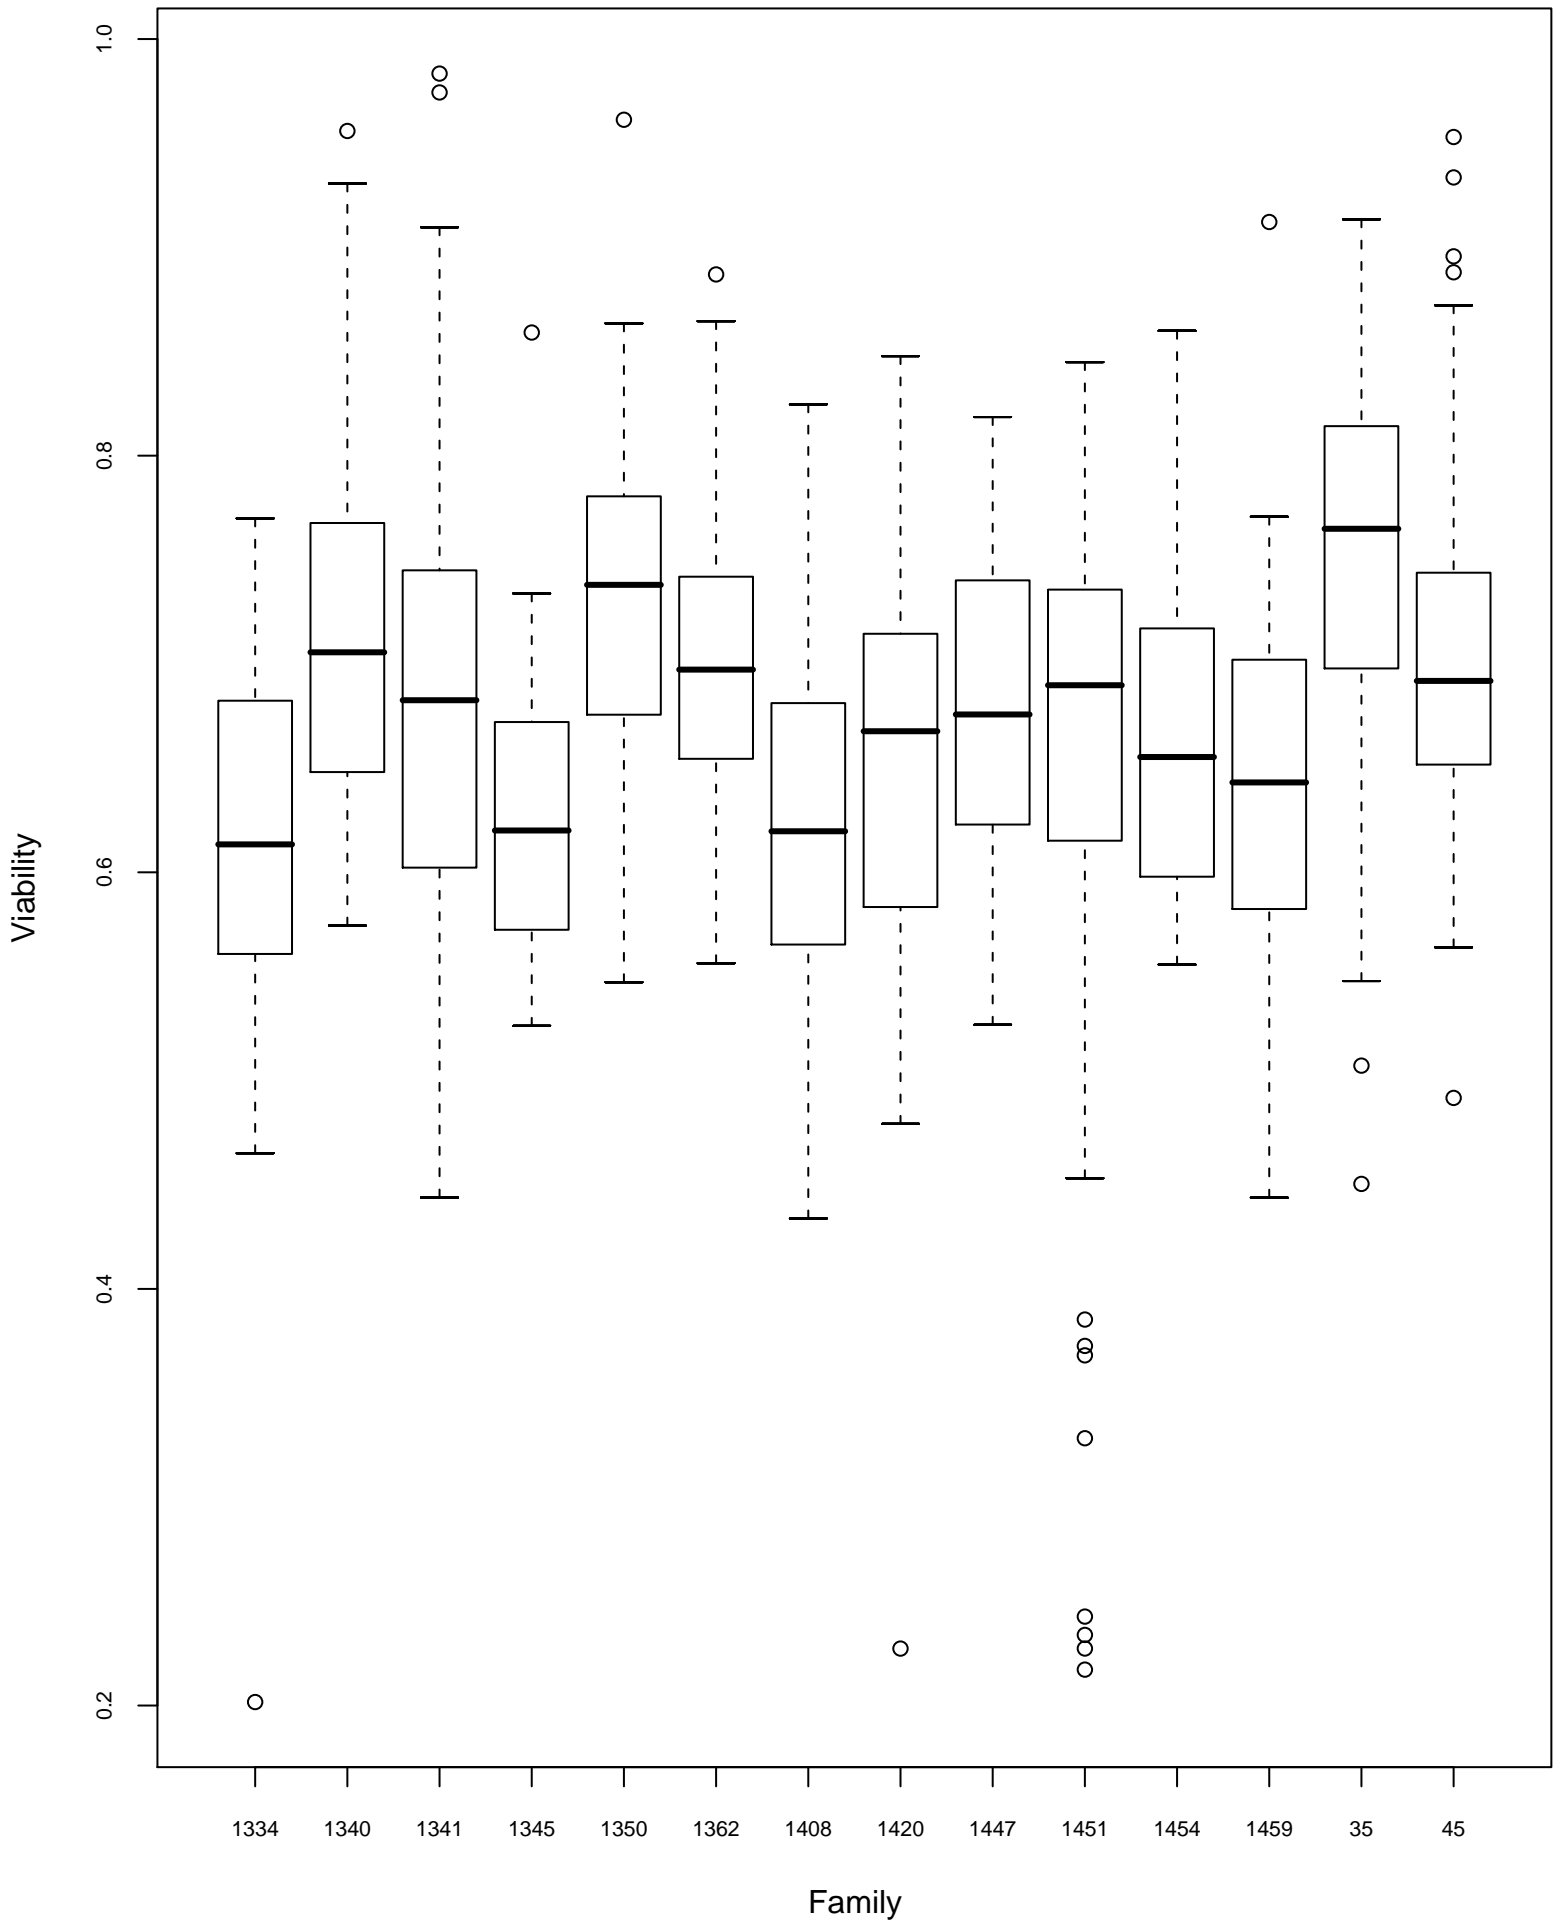

# Drug 5FU, dose 0.001097 (mM)

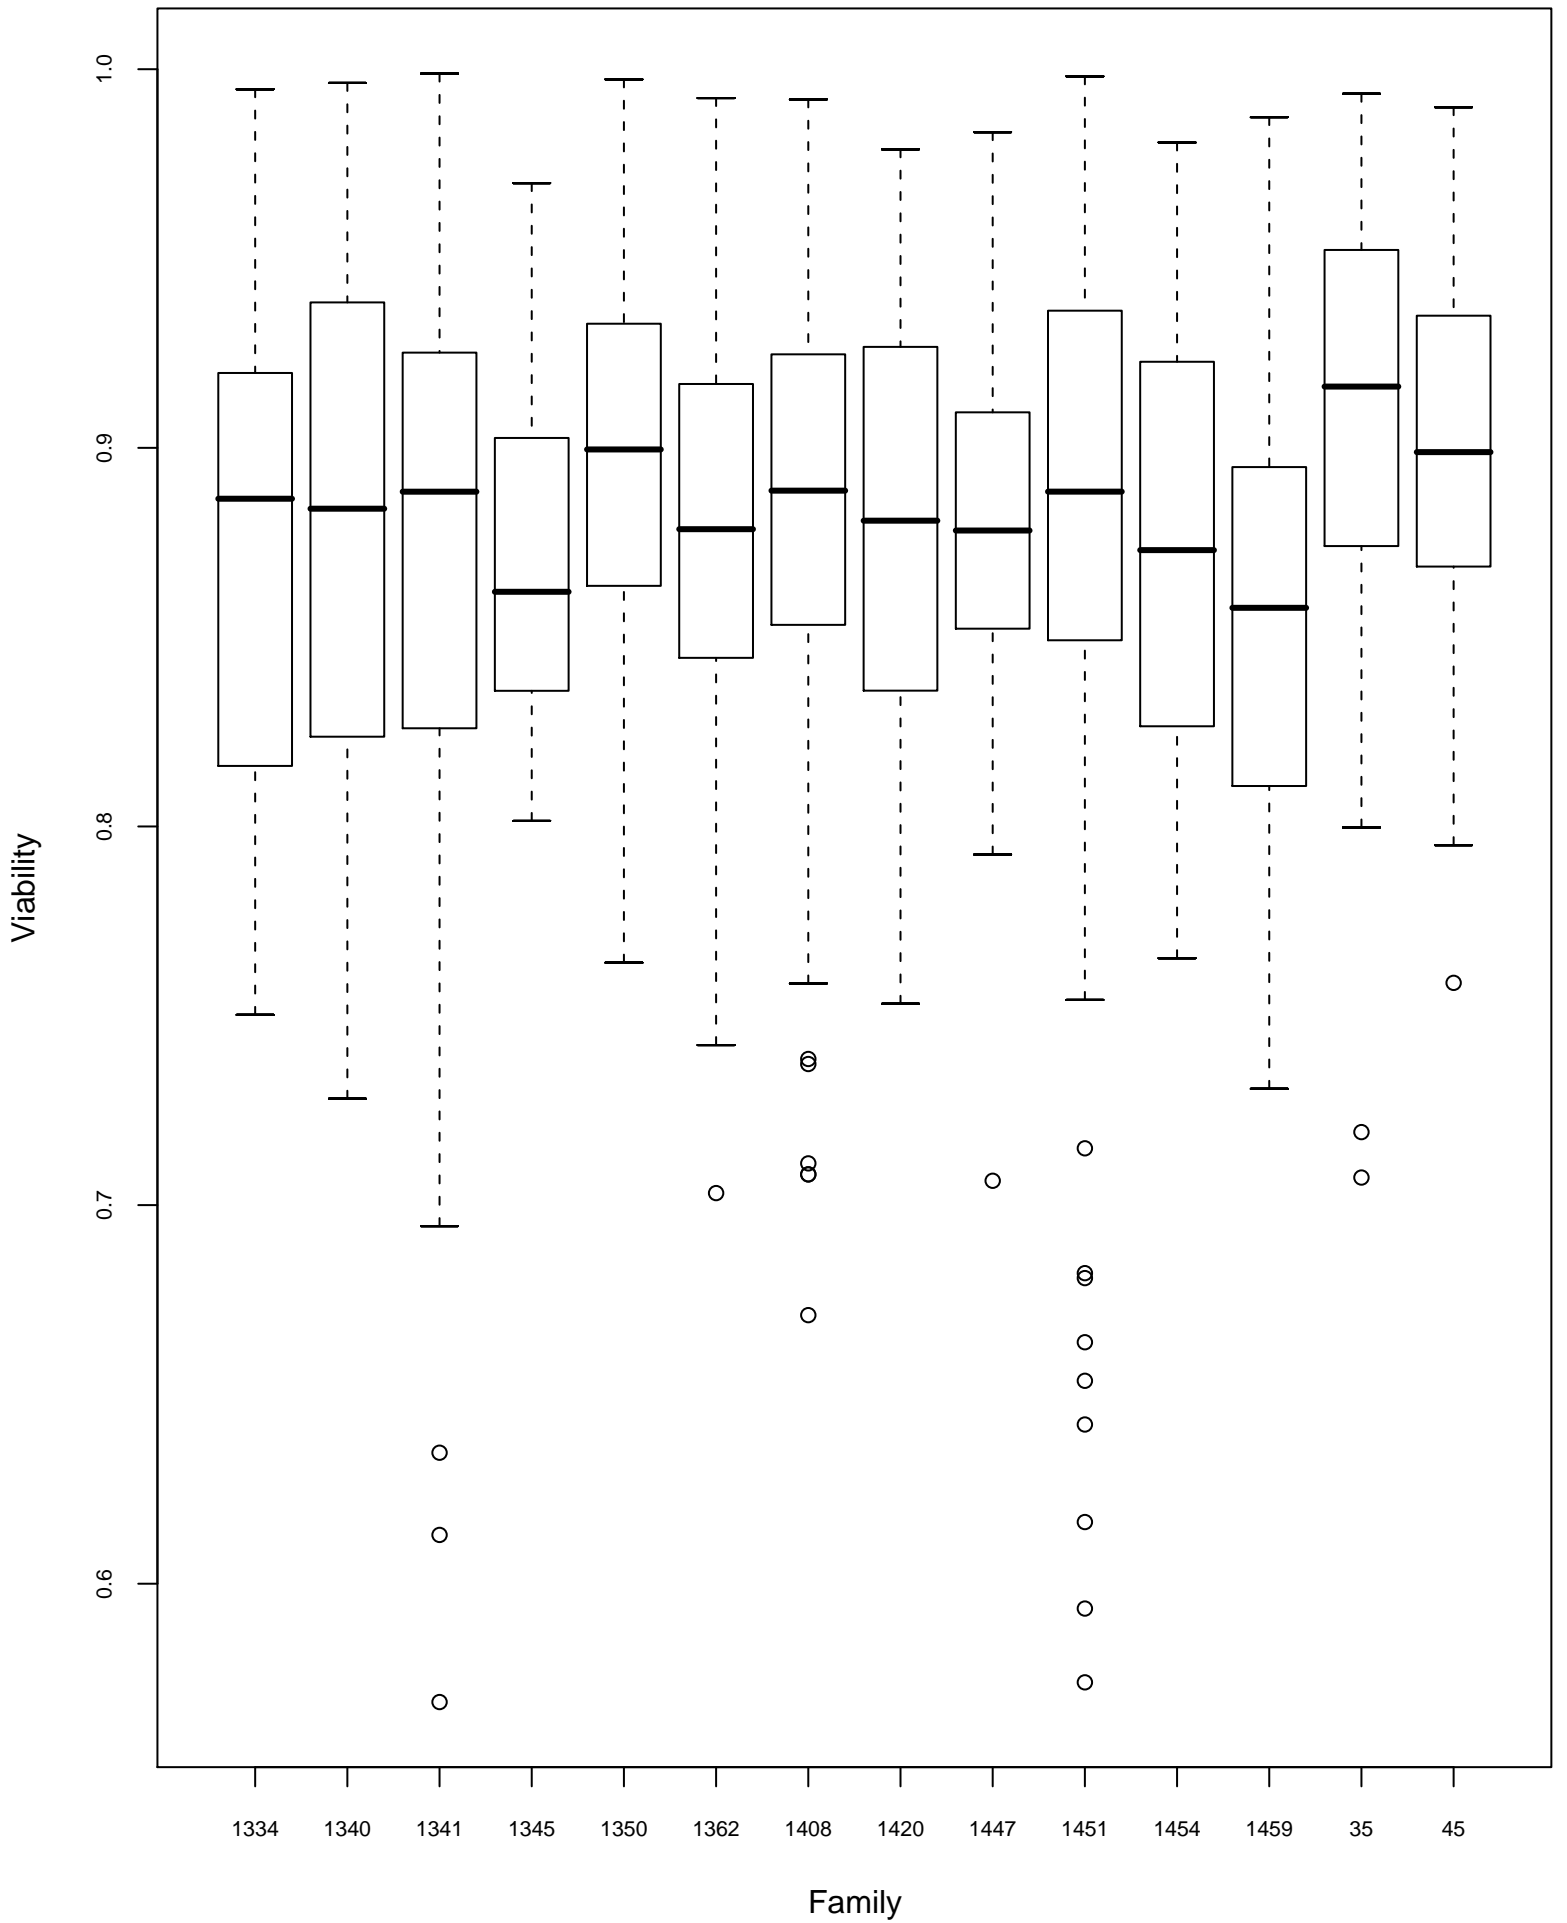

# Drug Arsen, dose 0.1 (mM)

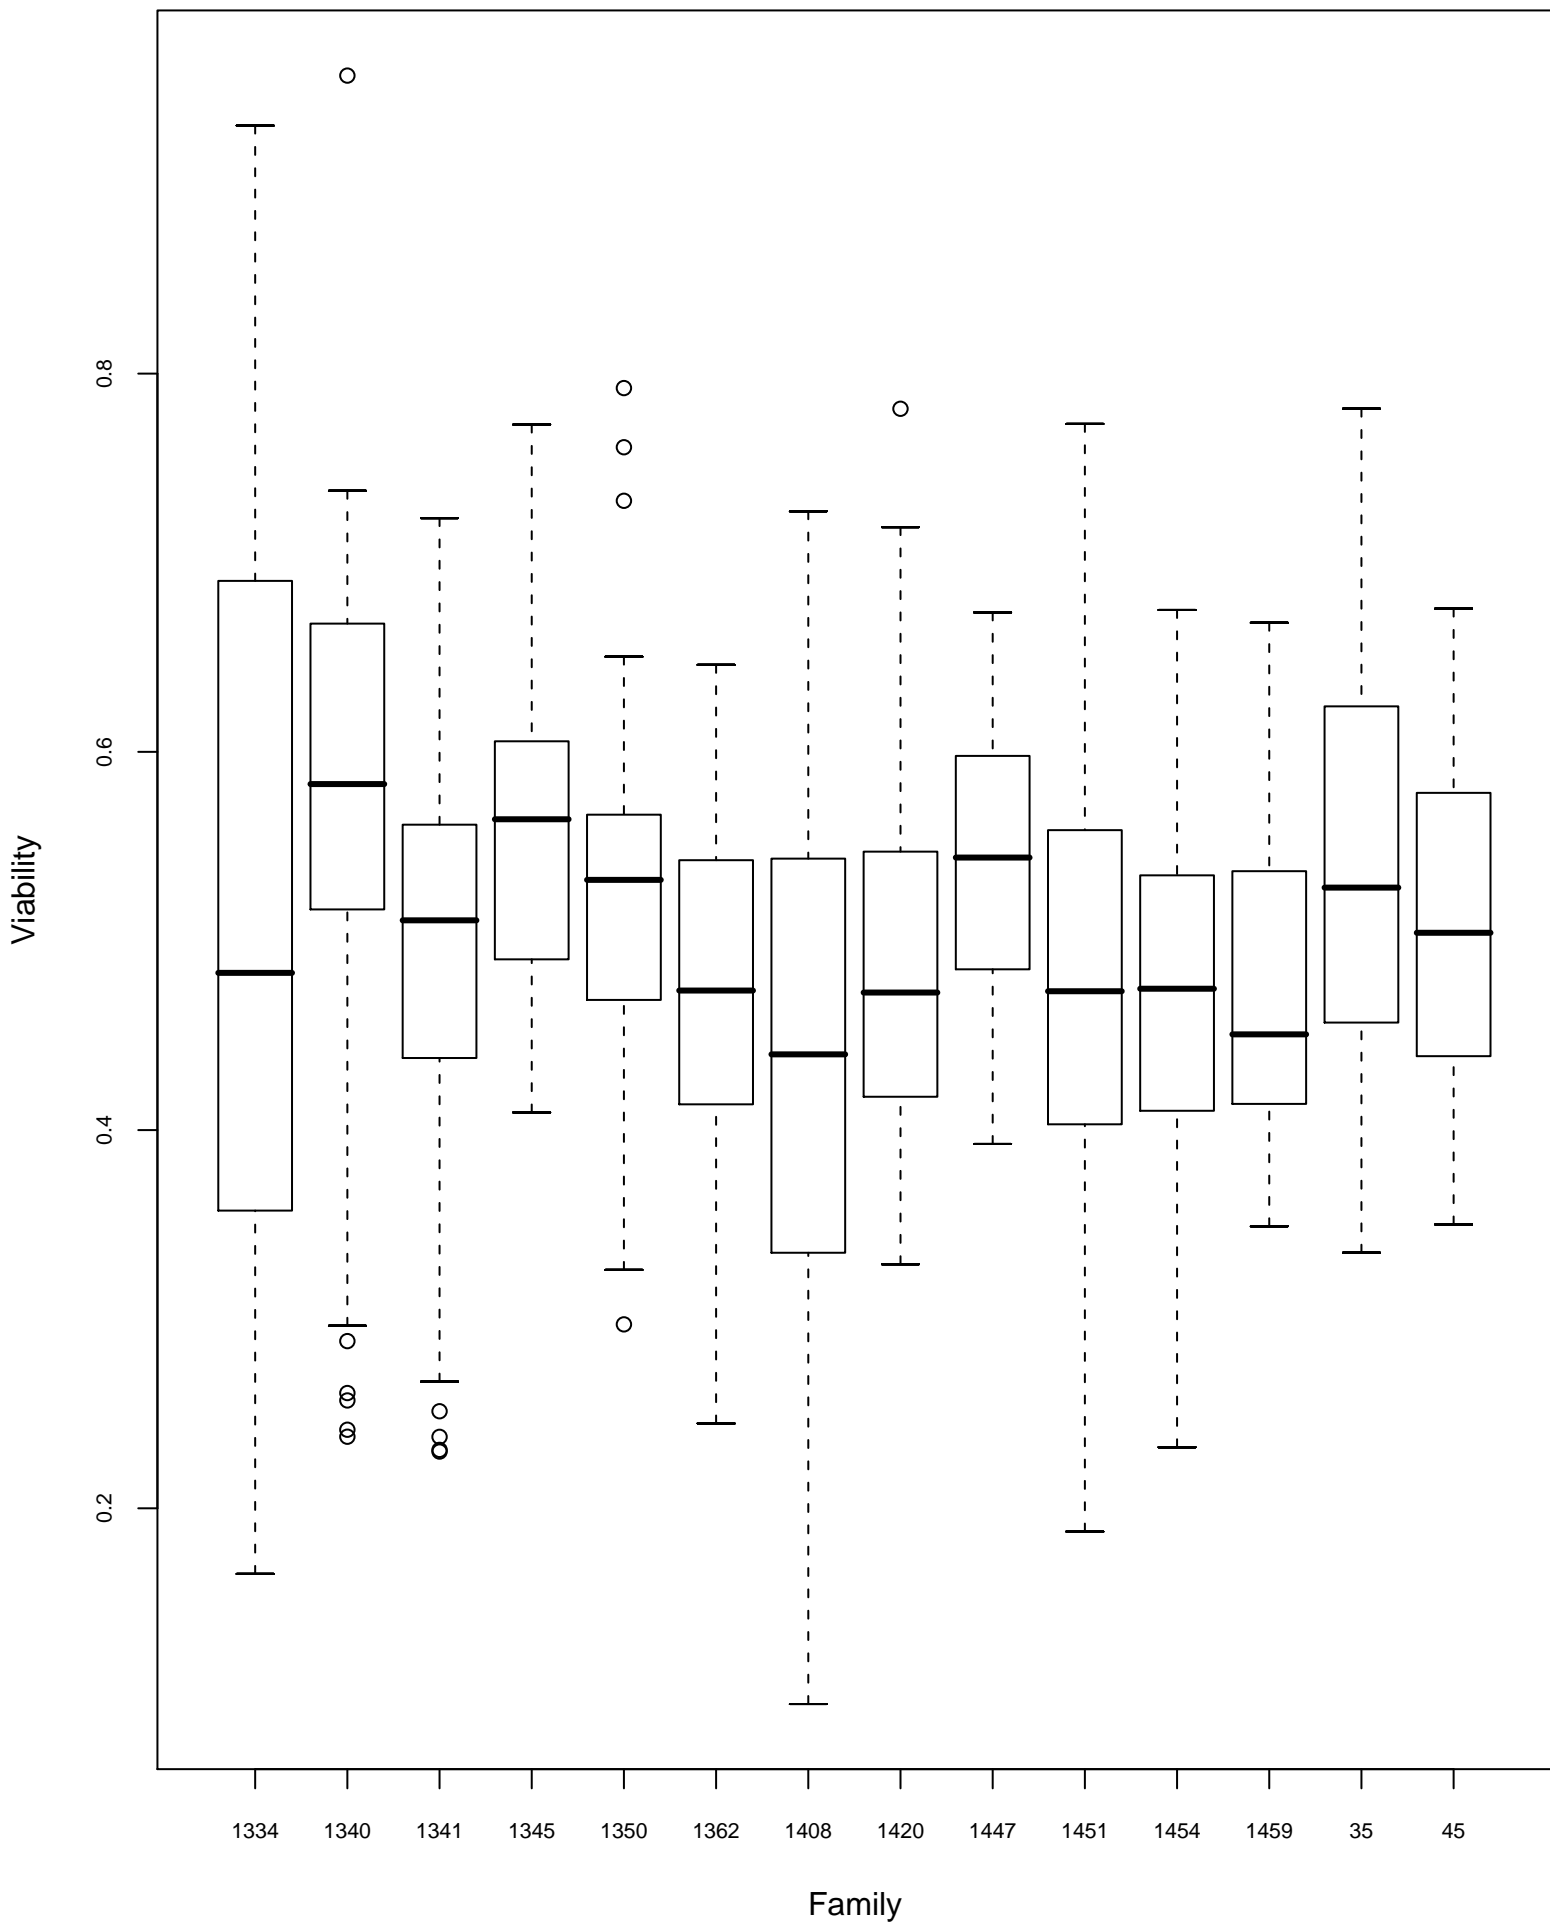

# Drug Arsen, dose 0.06667 (mM)

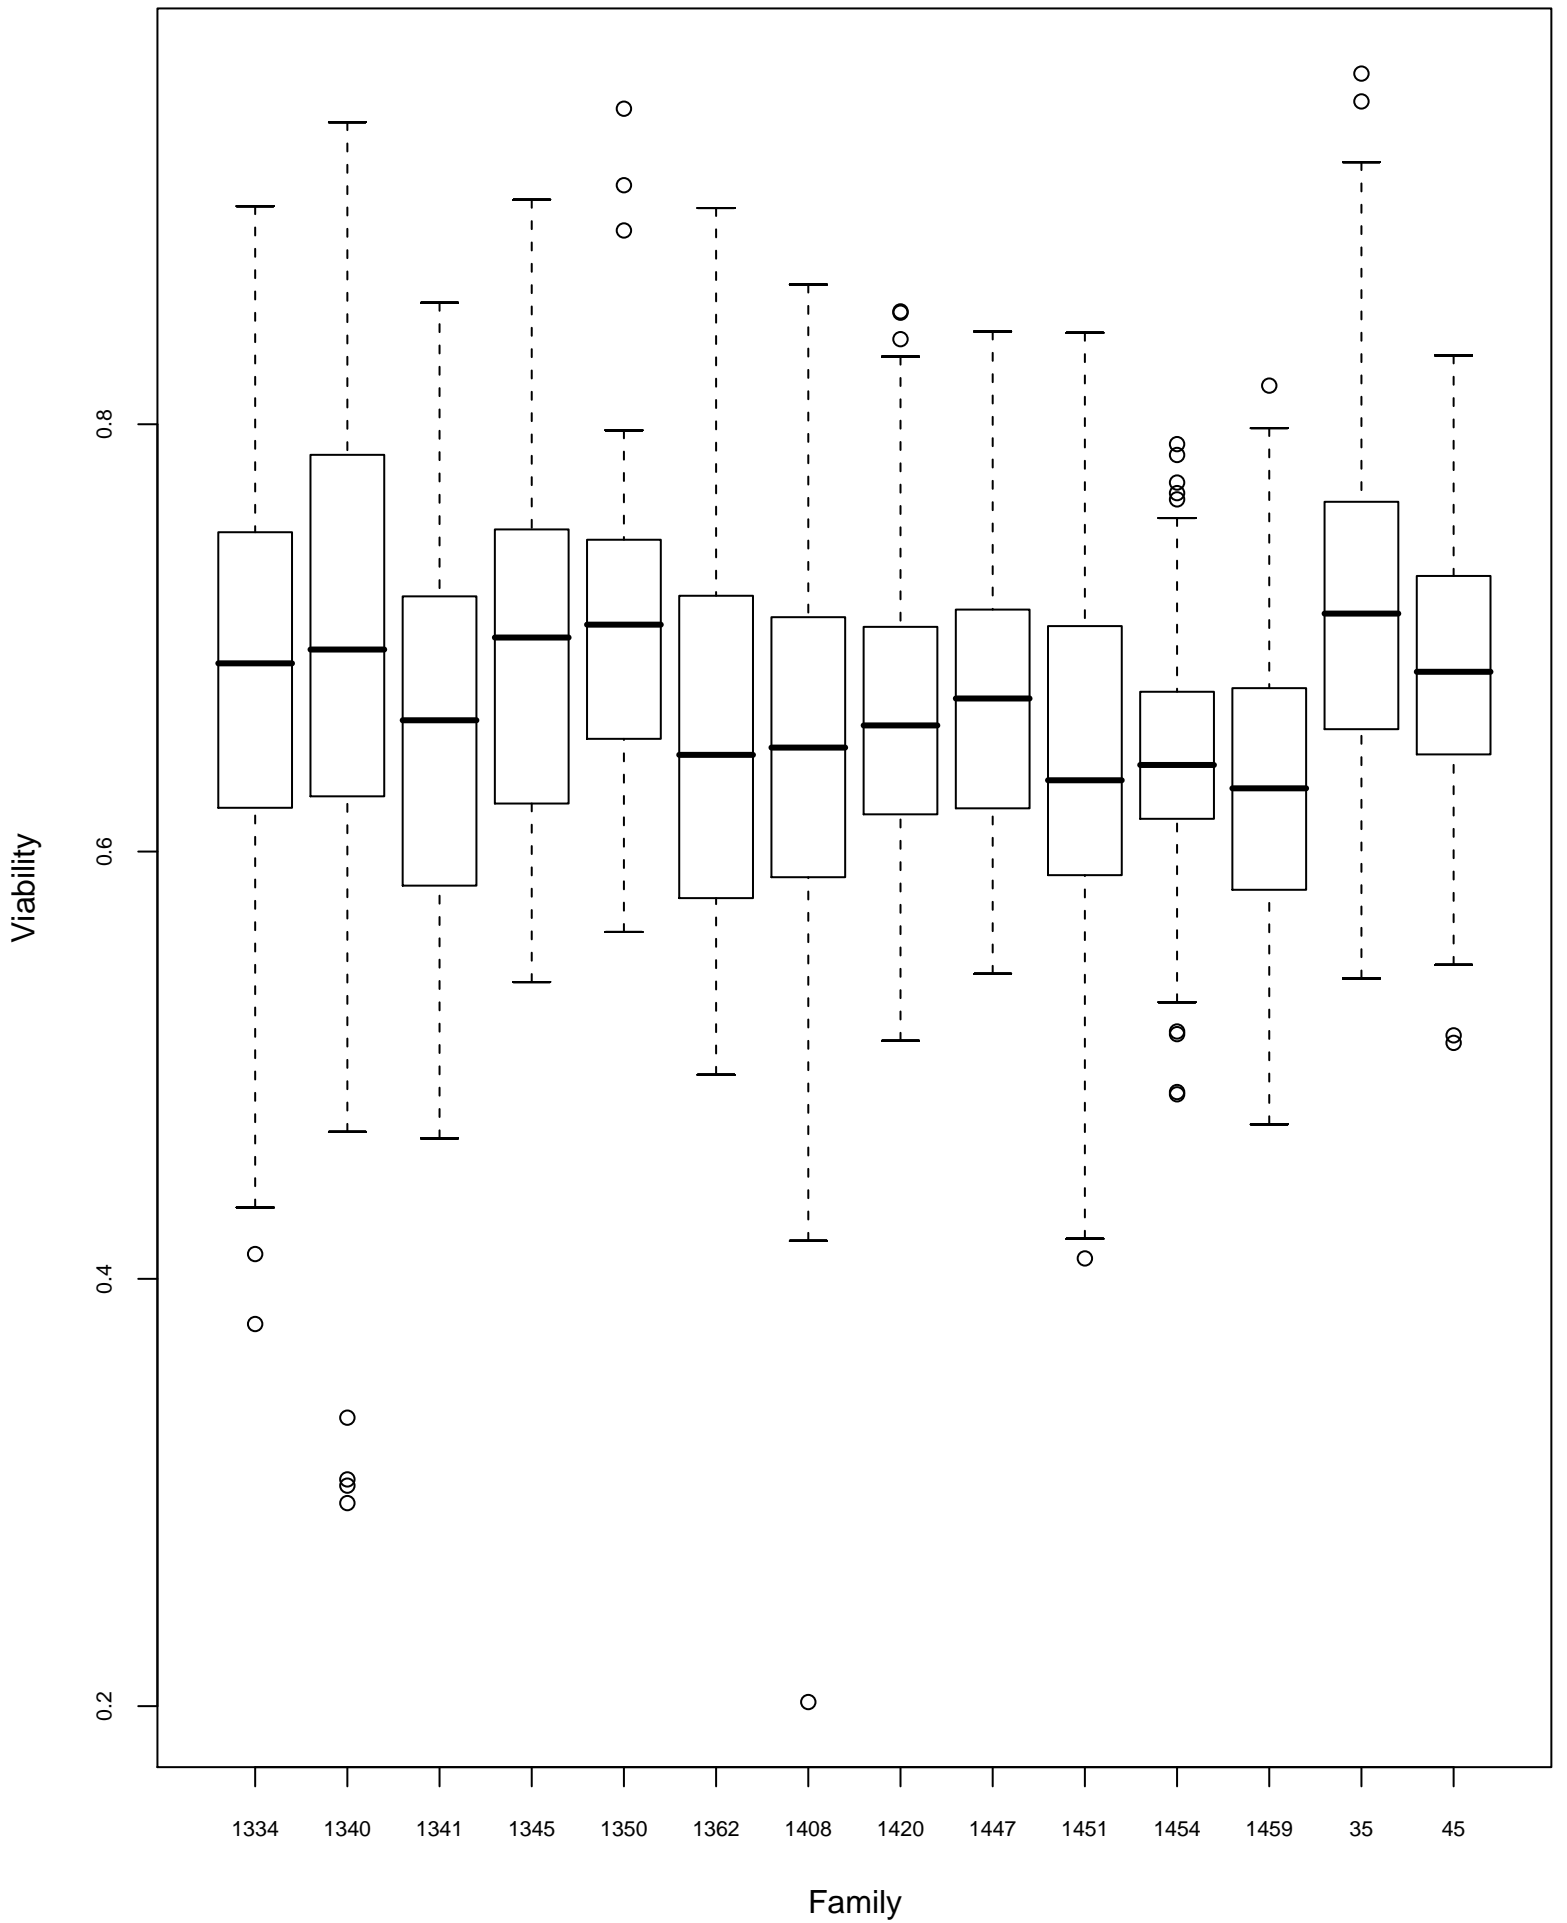

# Drug Arsen, dose 0.04444 (mM)

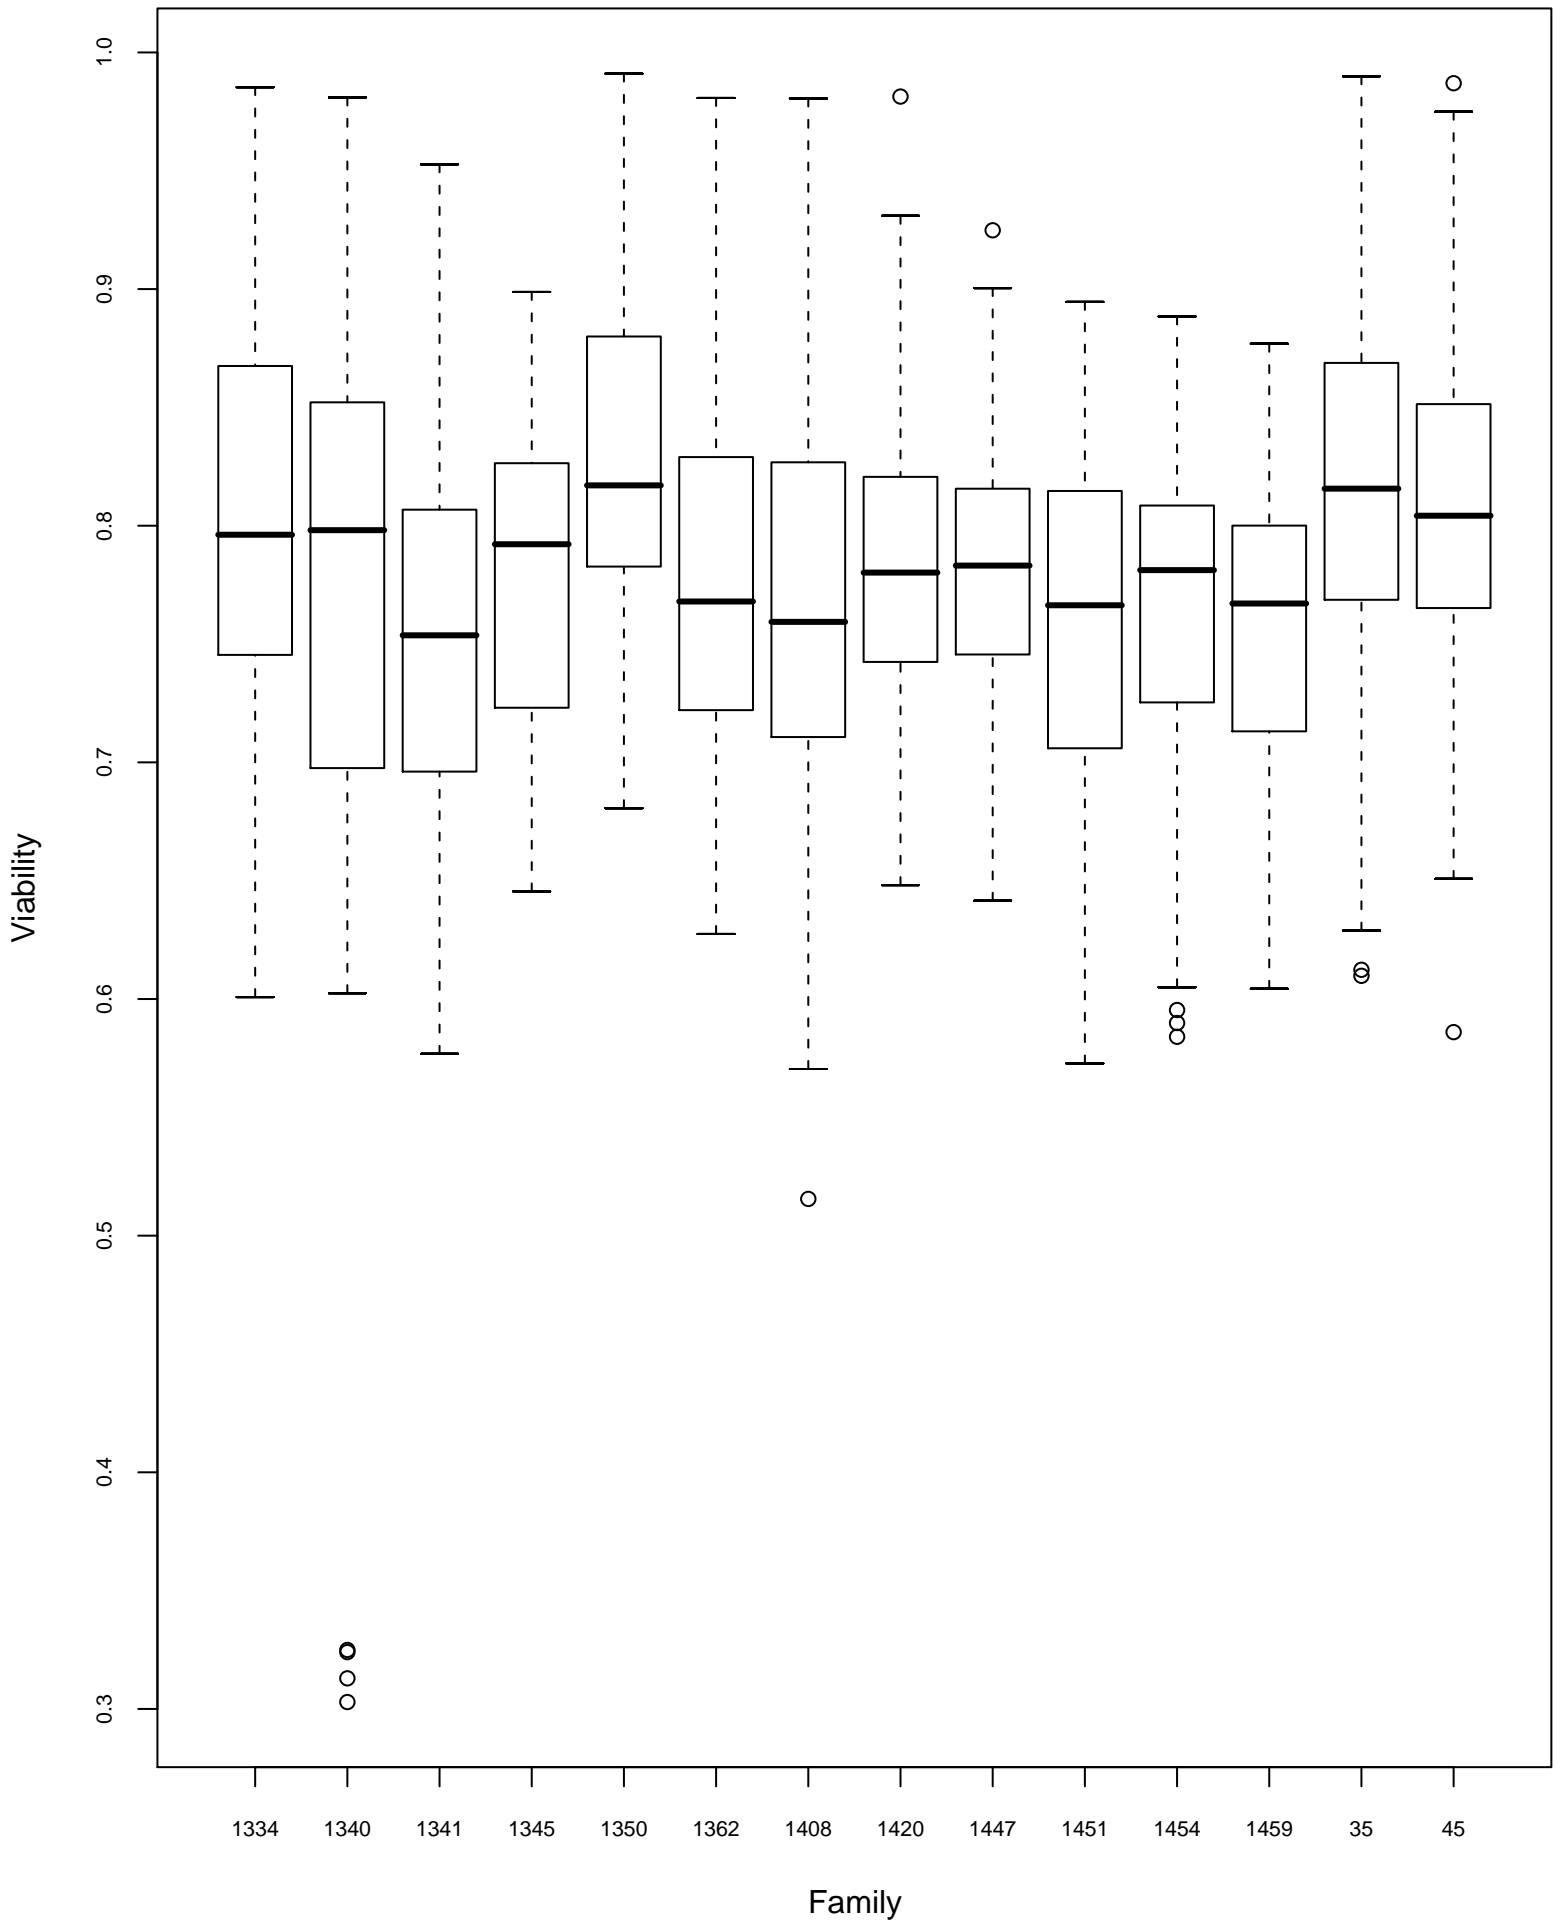

# Drug Arsen, dose 0.02963 (mM)

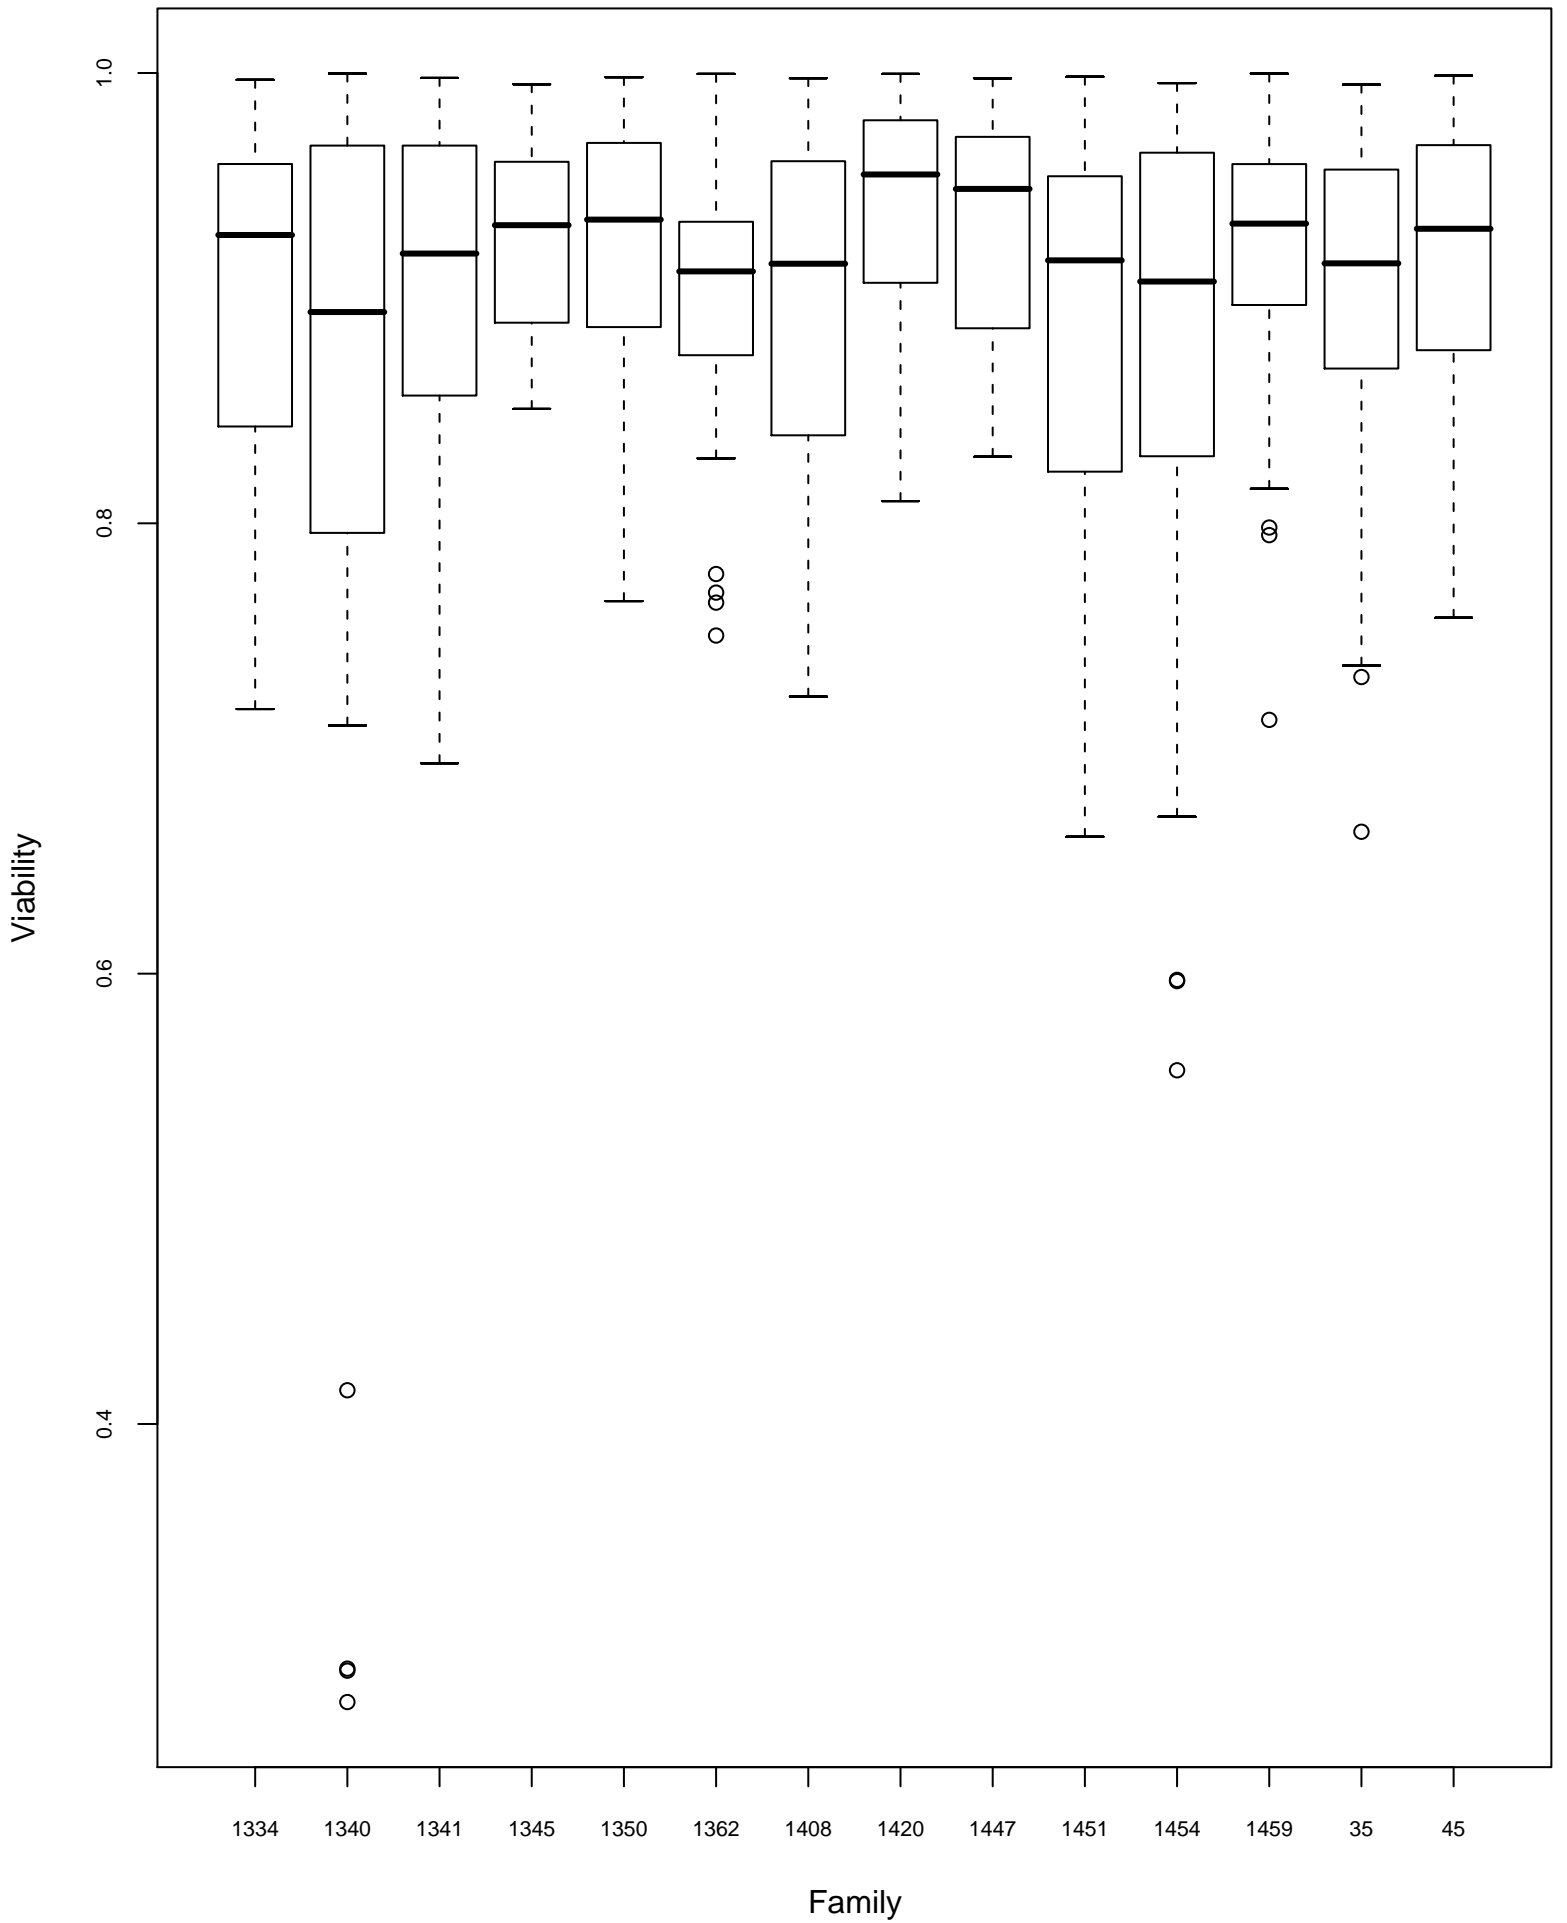



# Drug Aza, dose 0.0684 (mM)

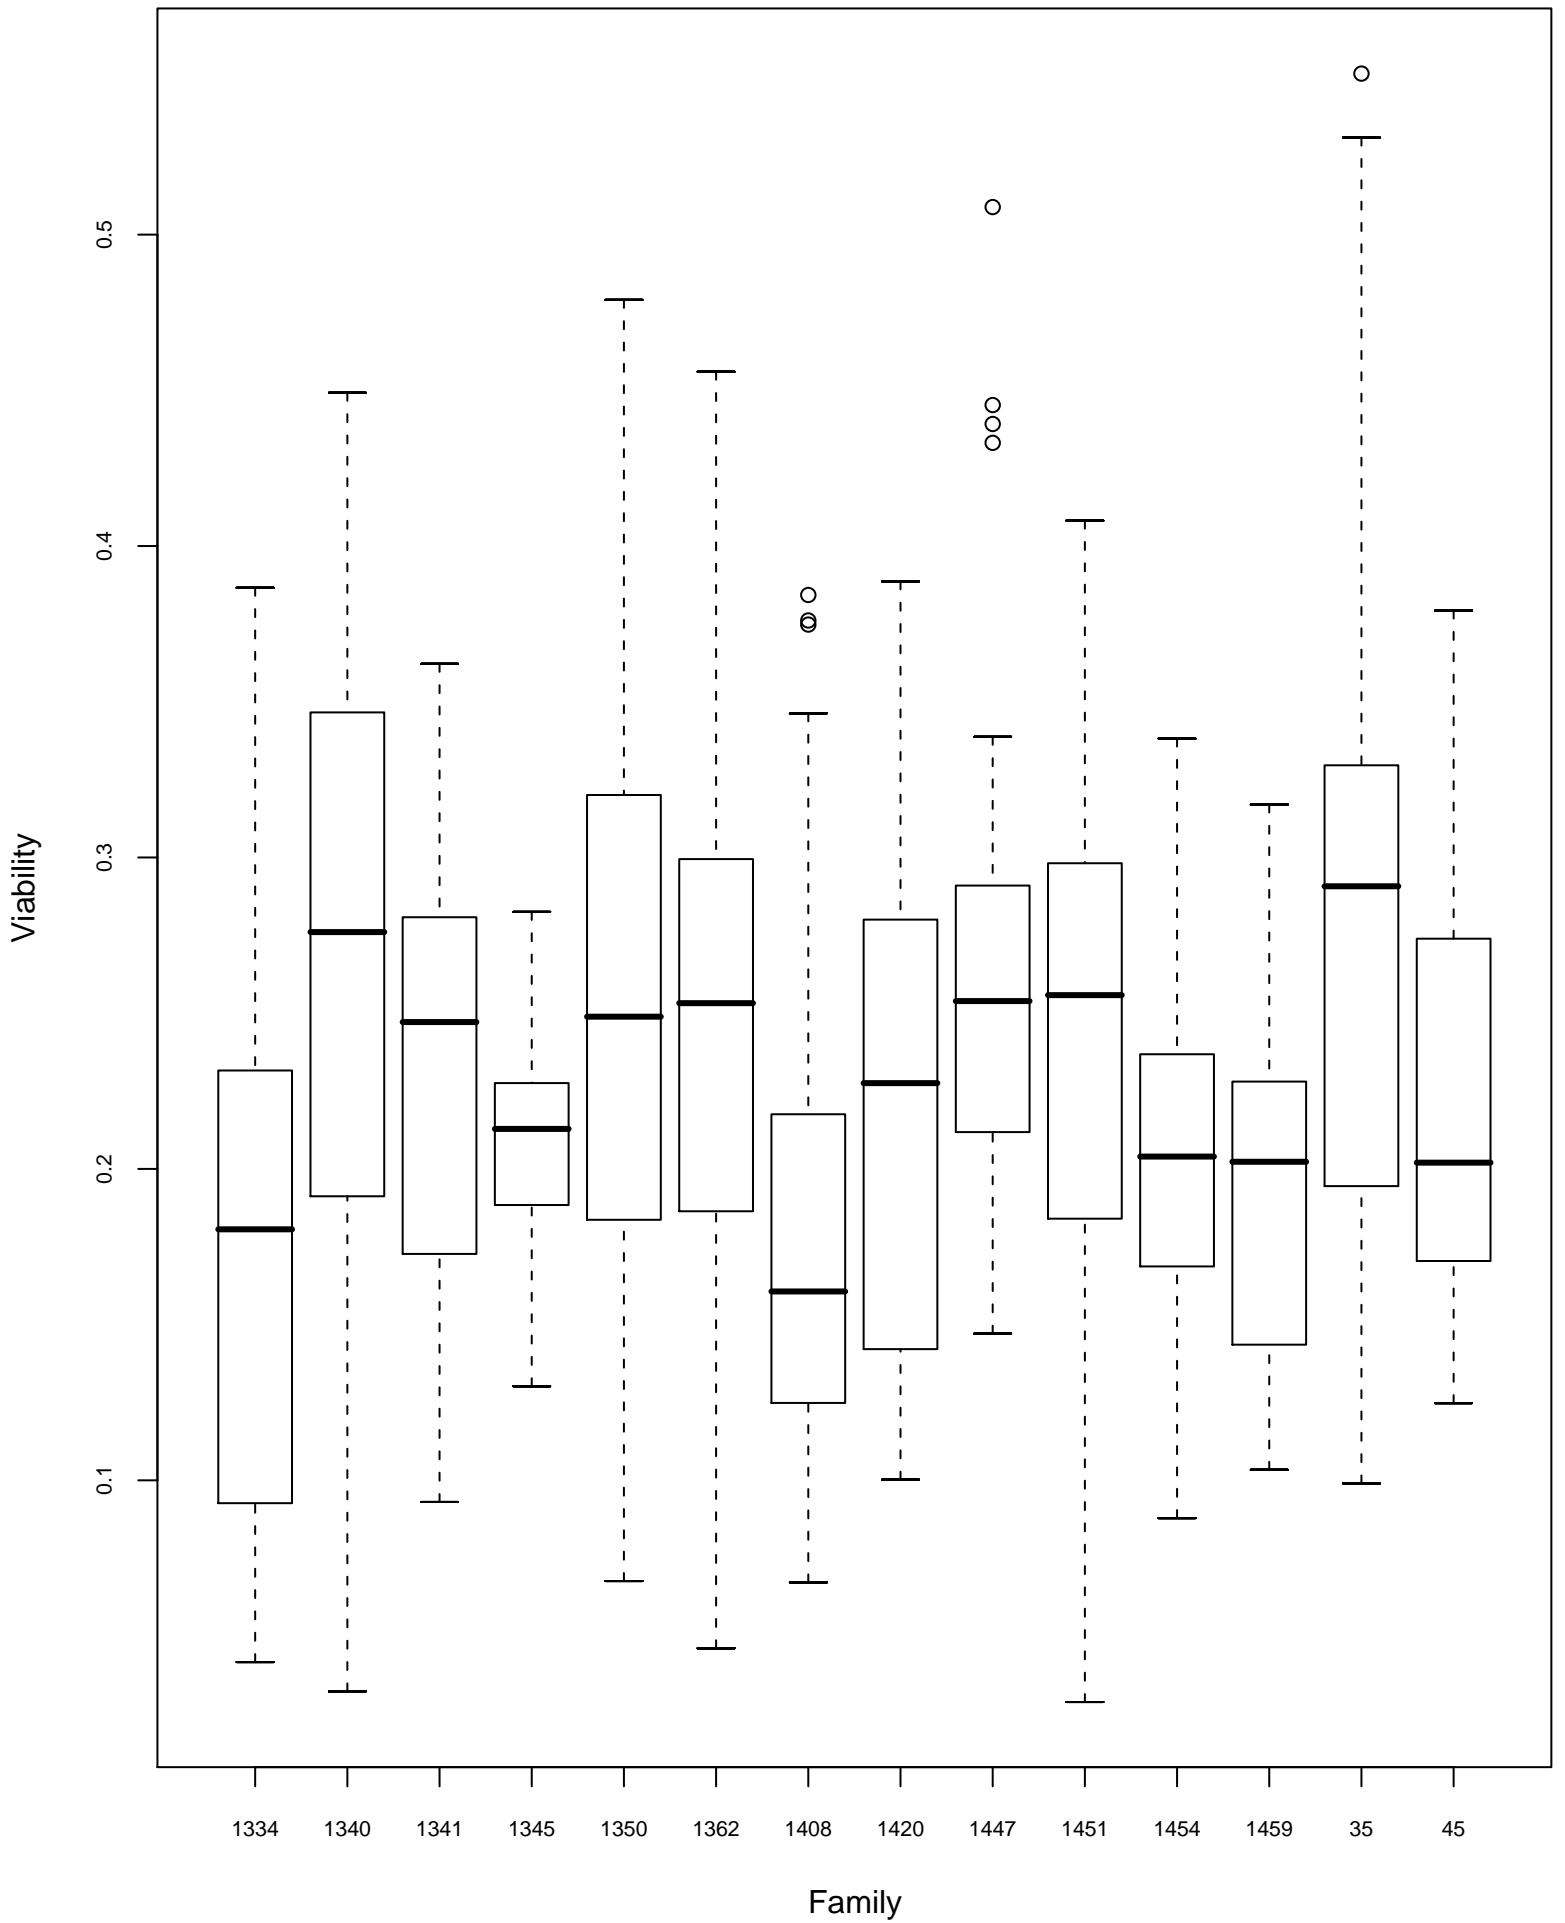

# Drug Aza, dose 0.0273 (mM)

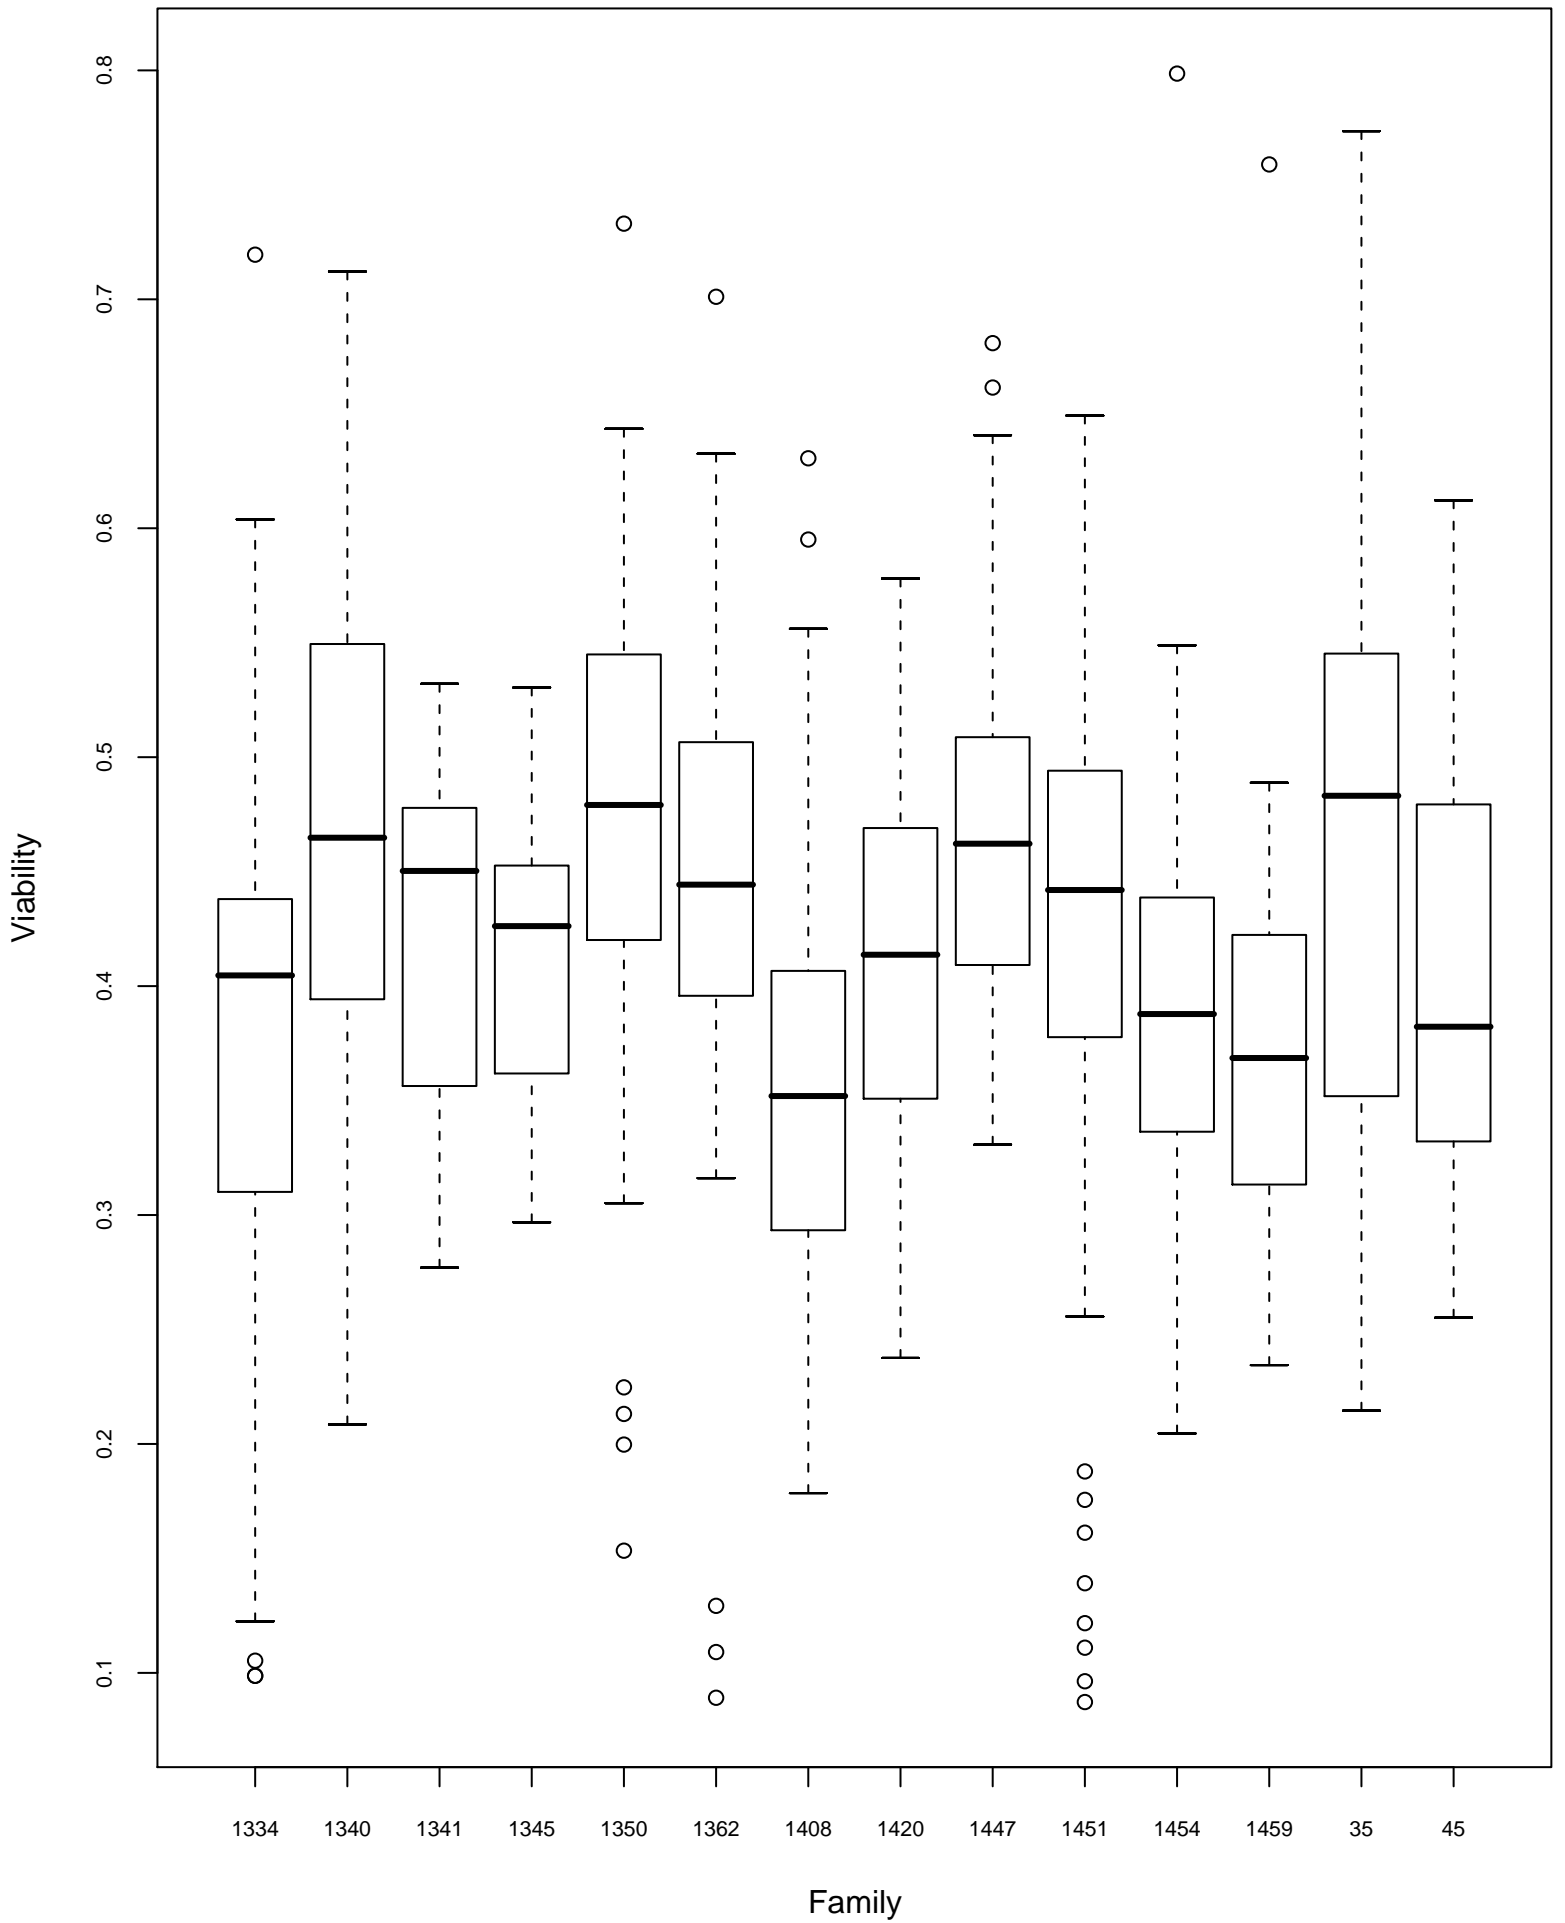

# Drug Aza, dose 0.0109 (mM)

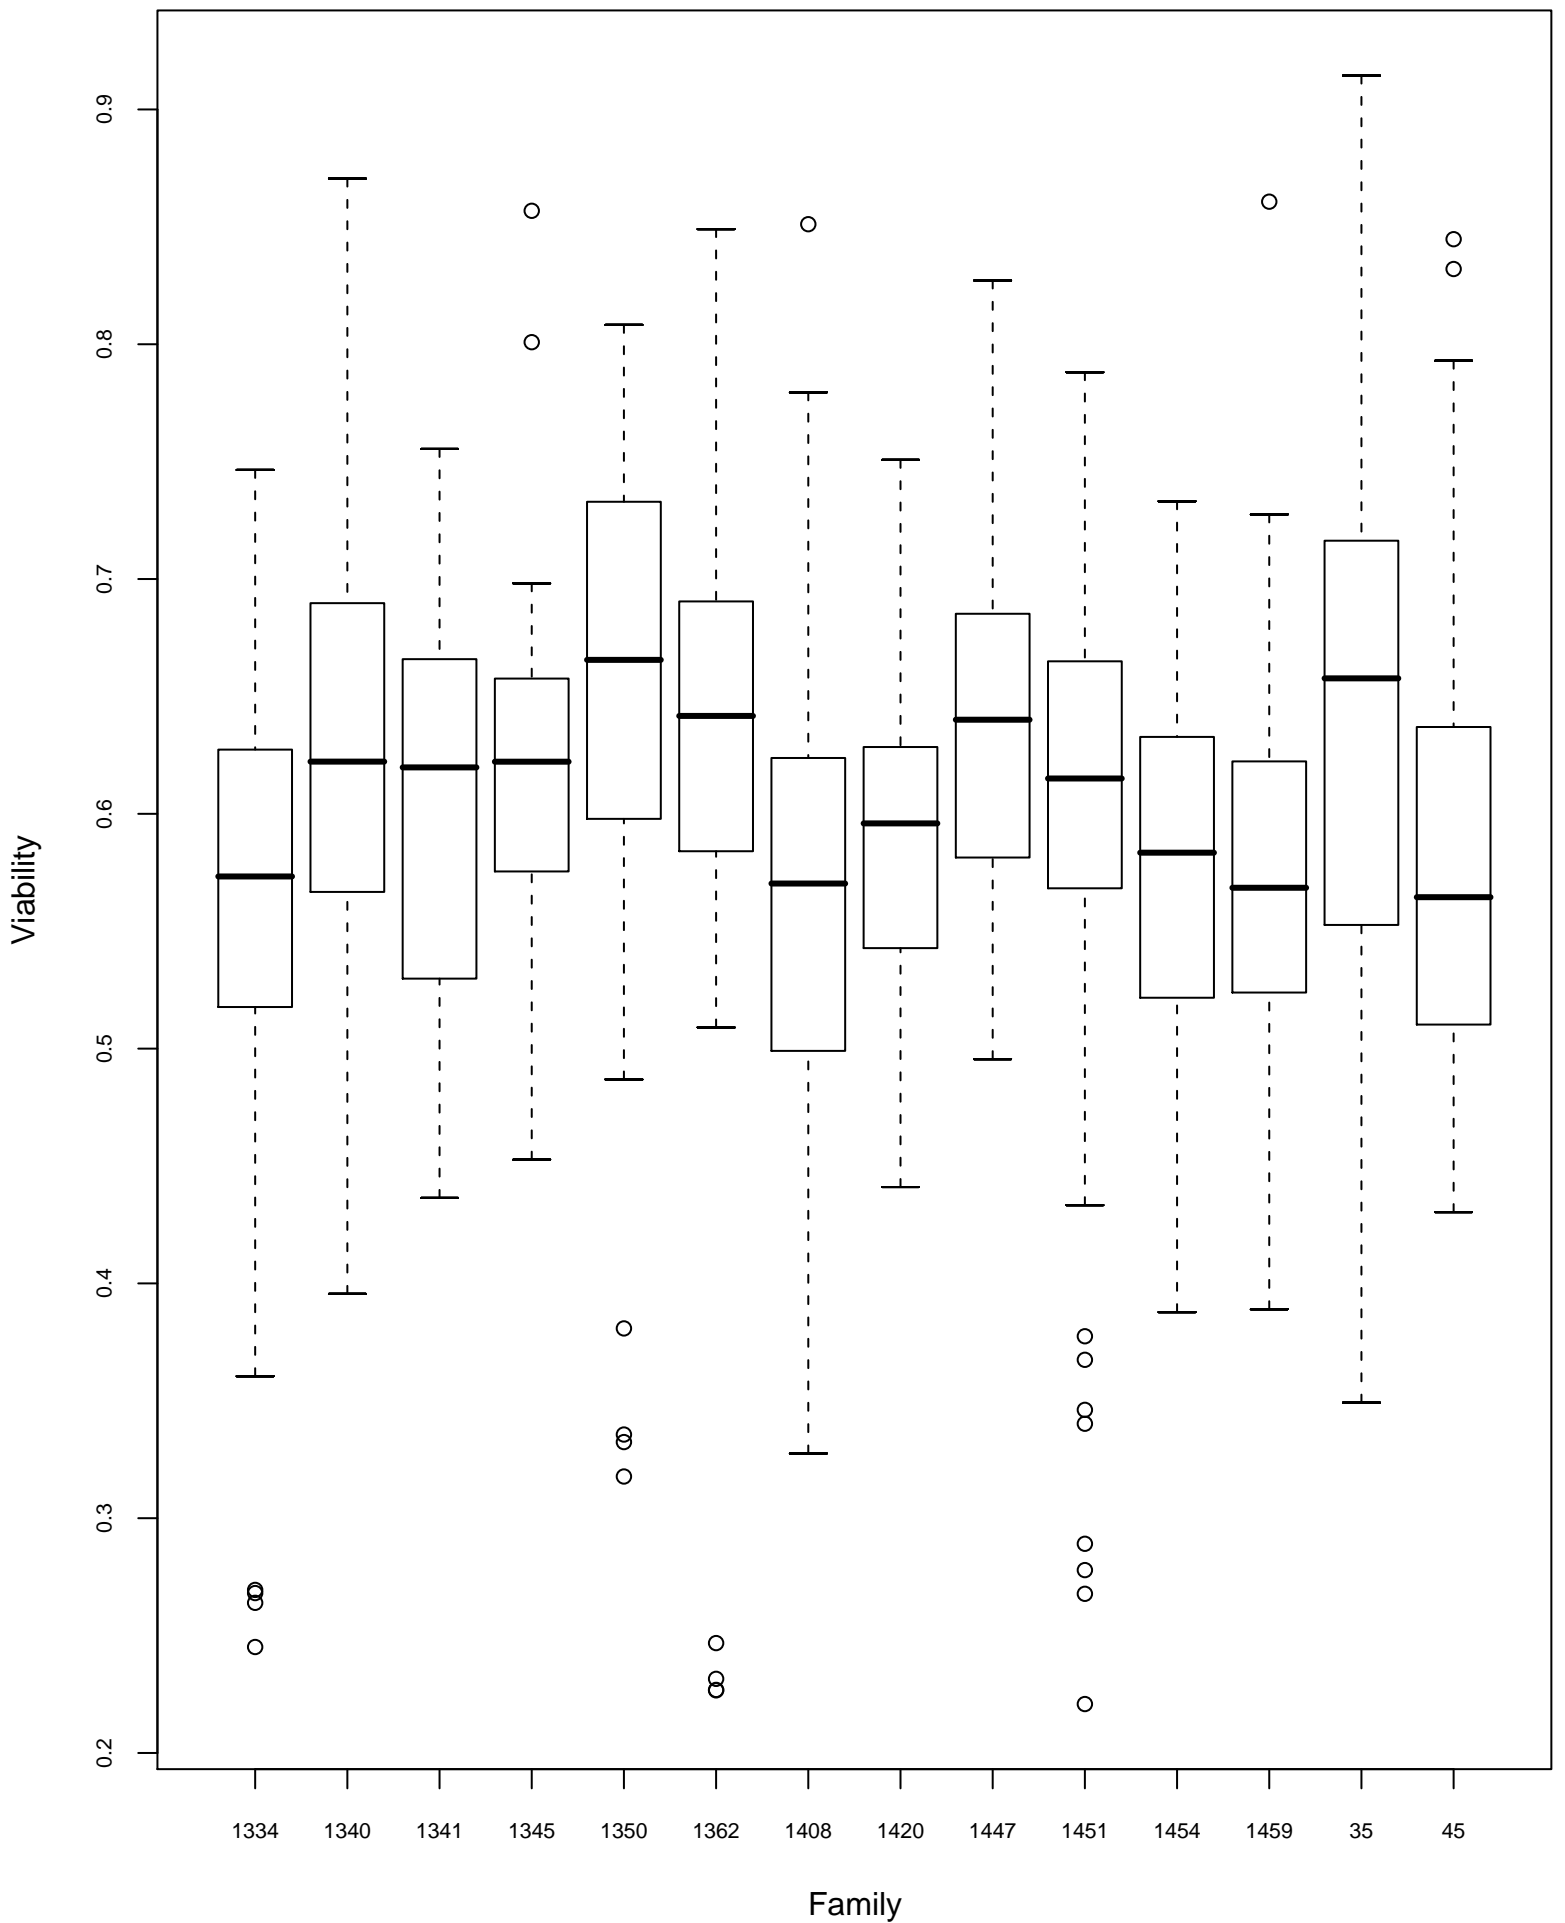

# Drug Aza, dose 0.004375 (mM)

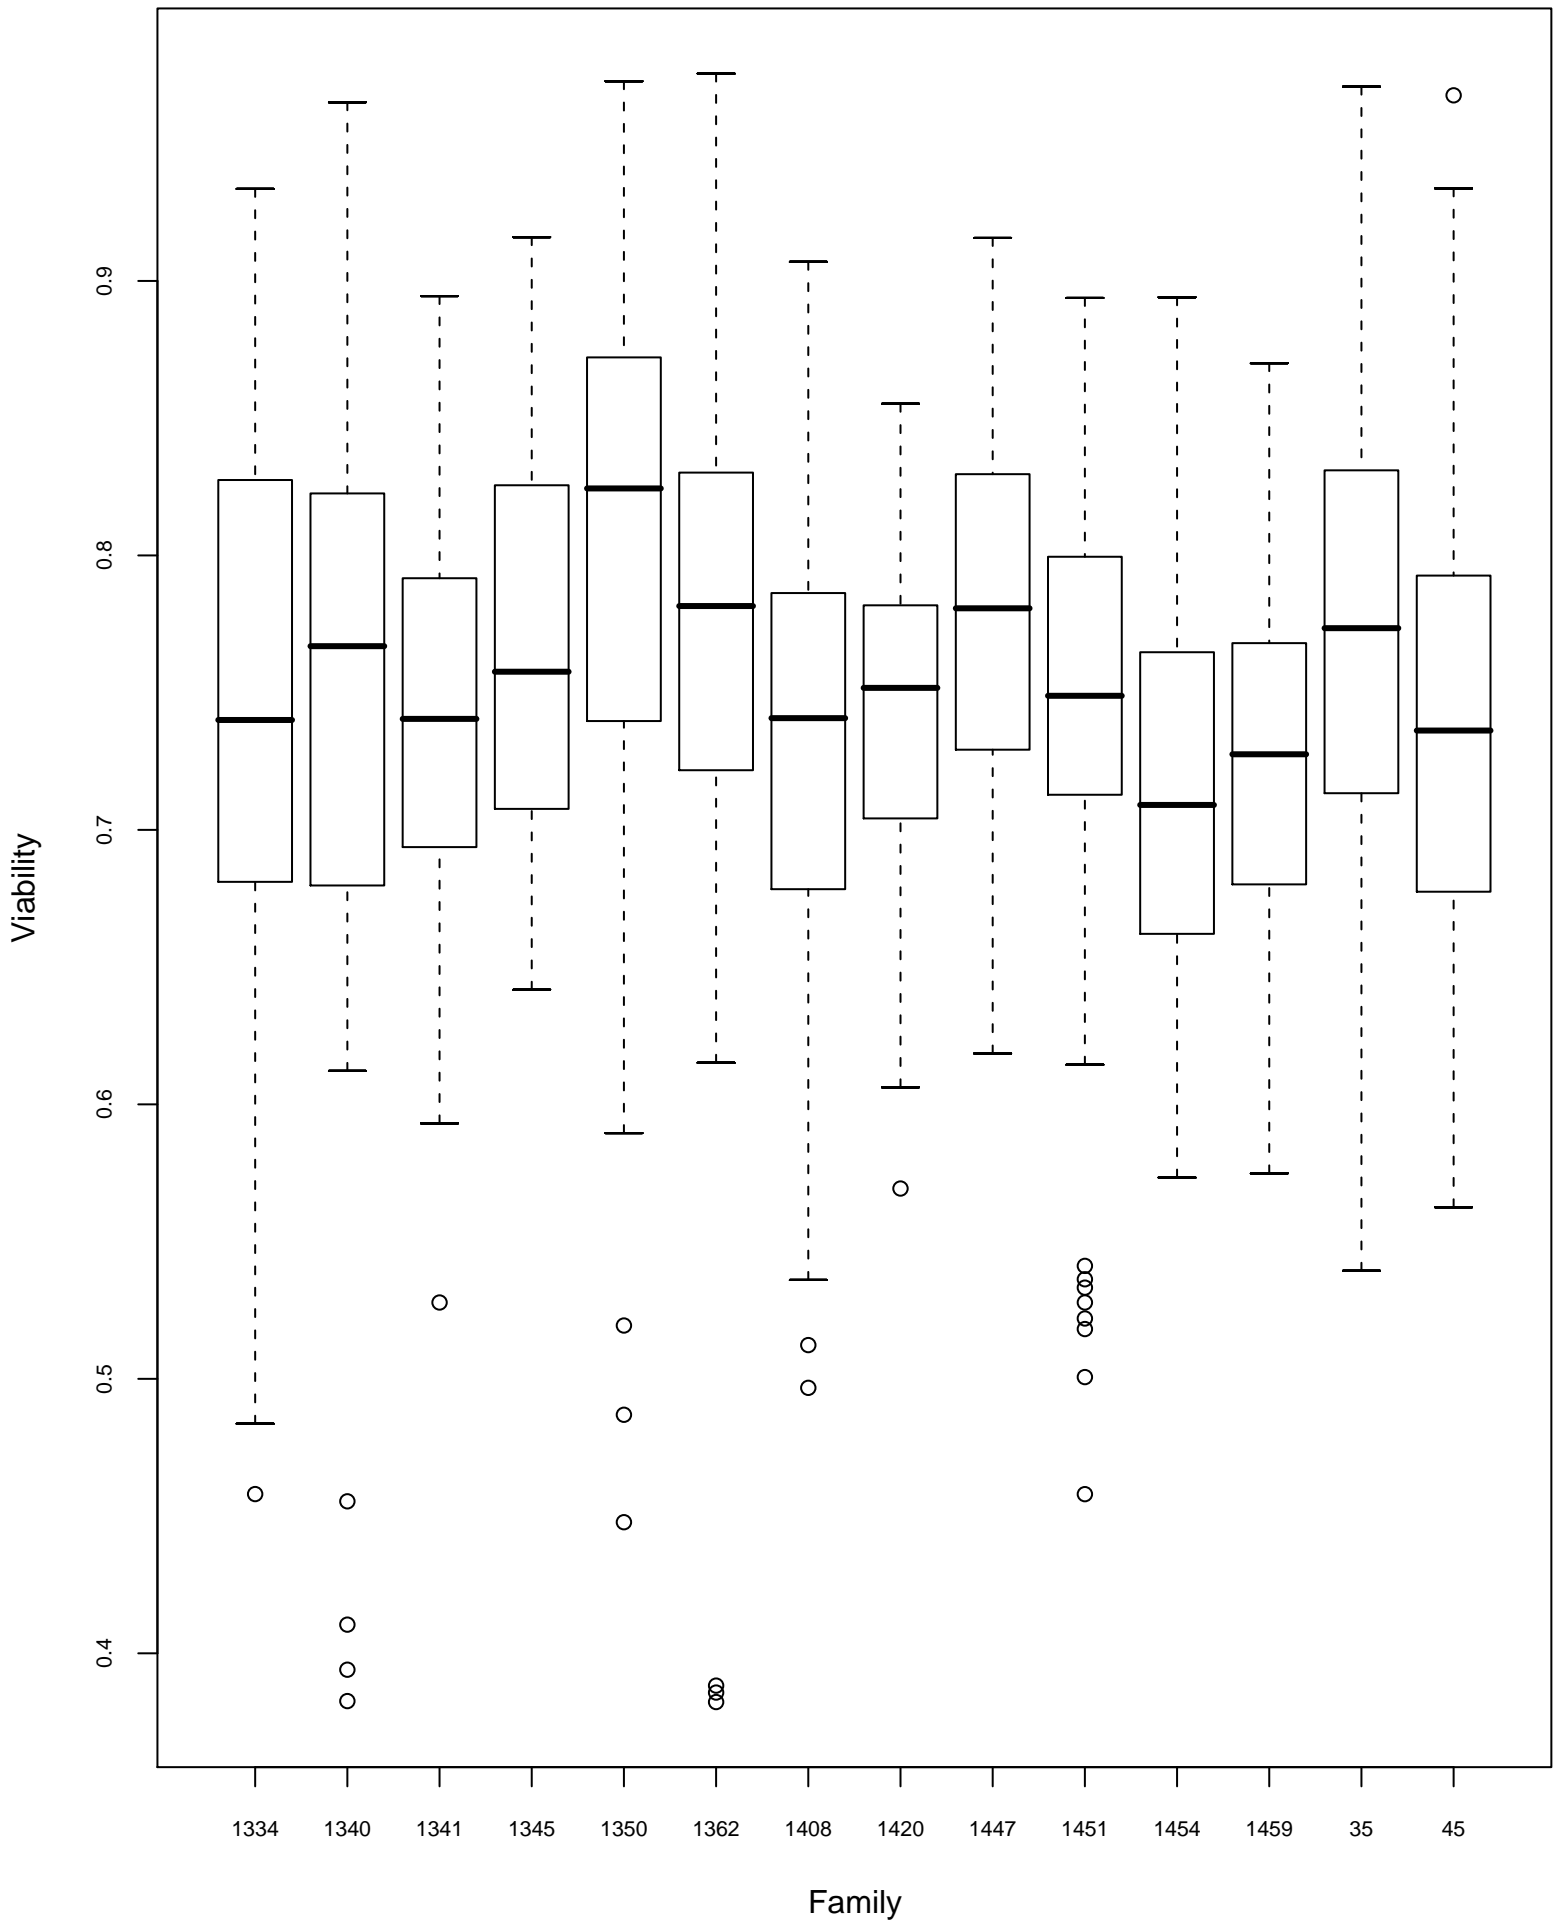

# Drug Bleo, dose 0.01 (mM)

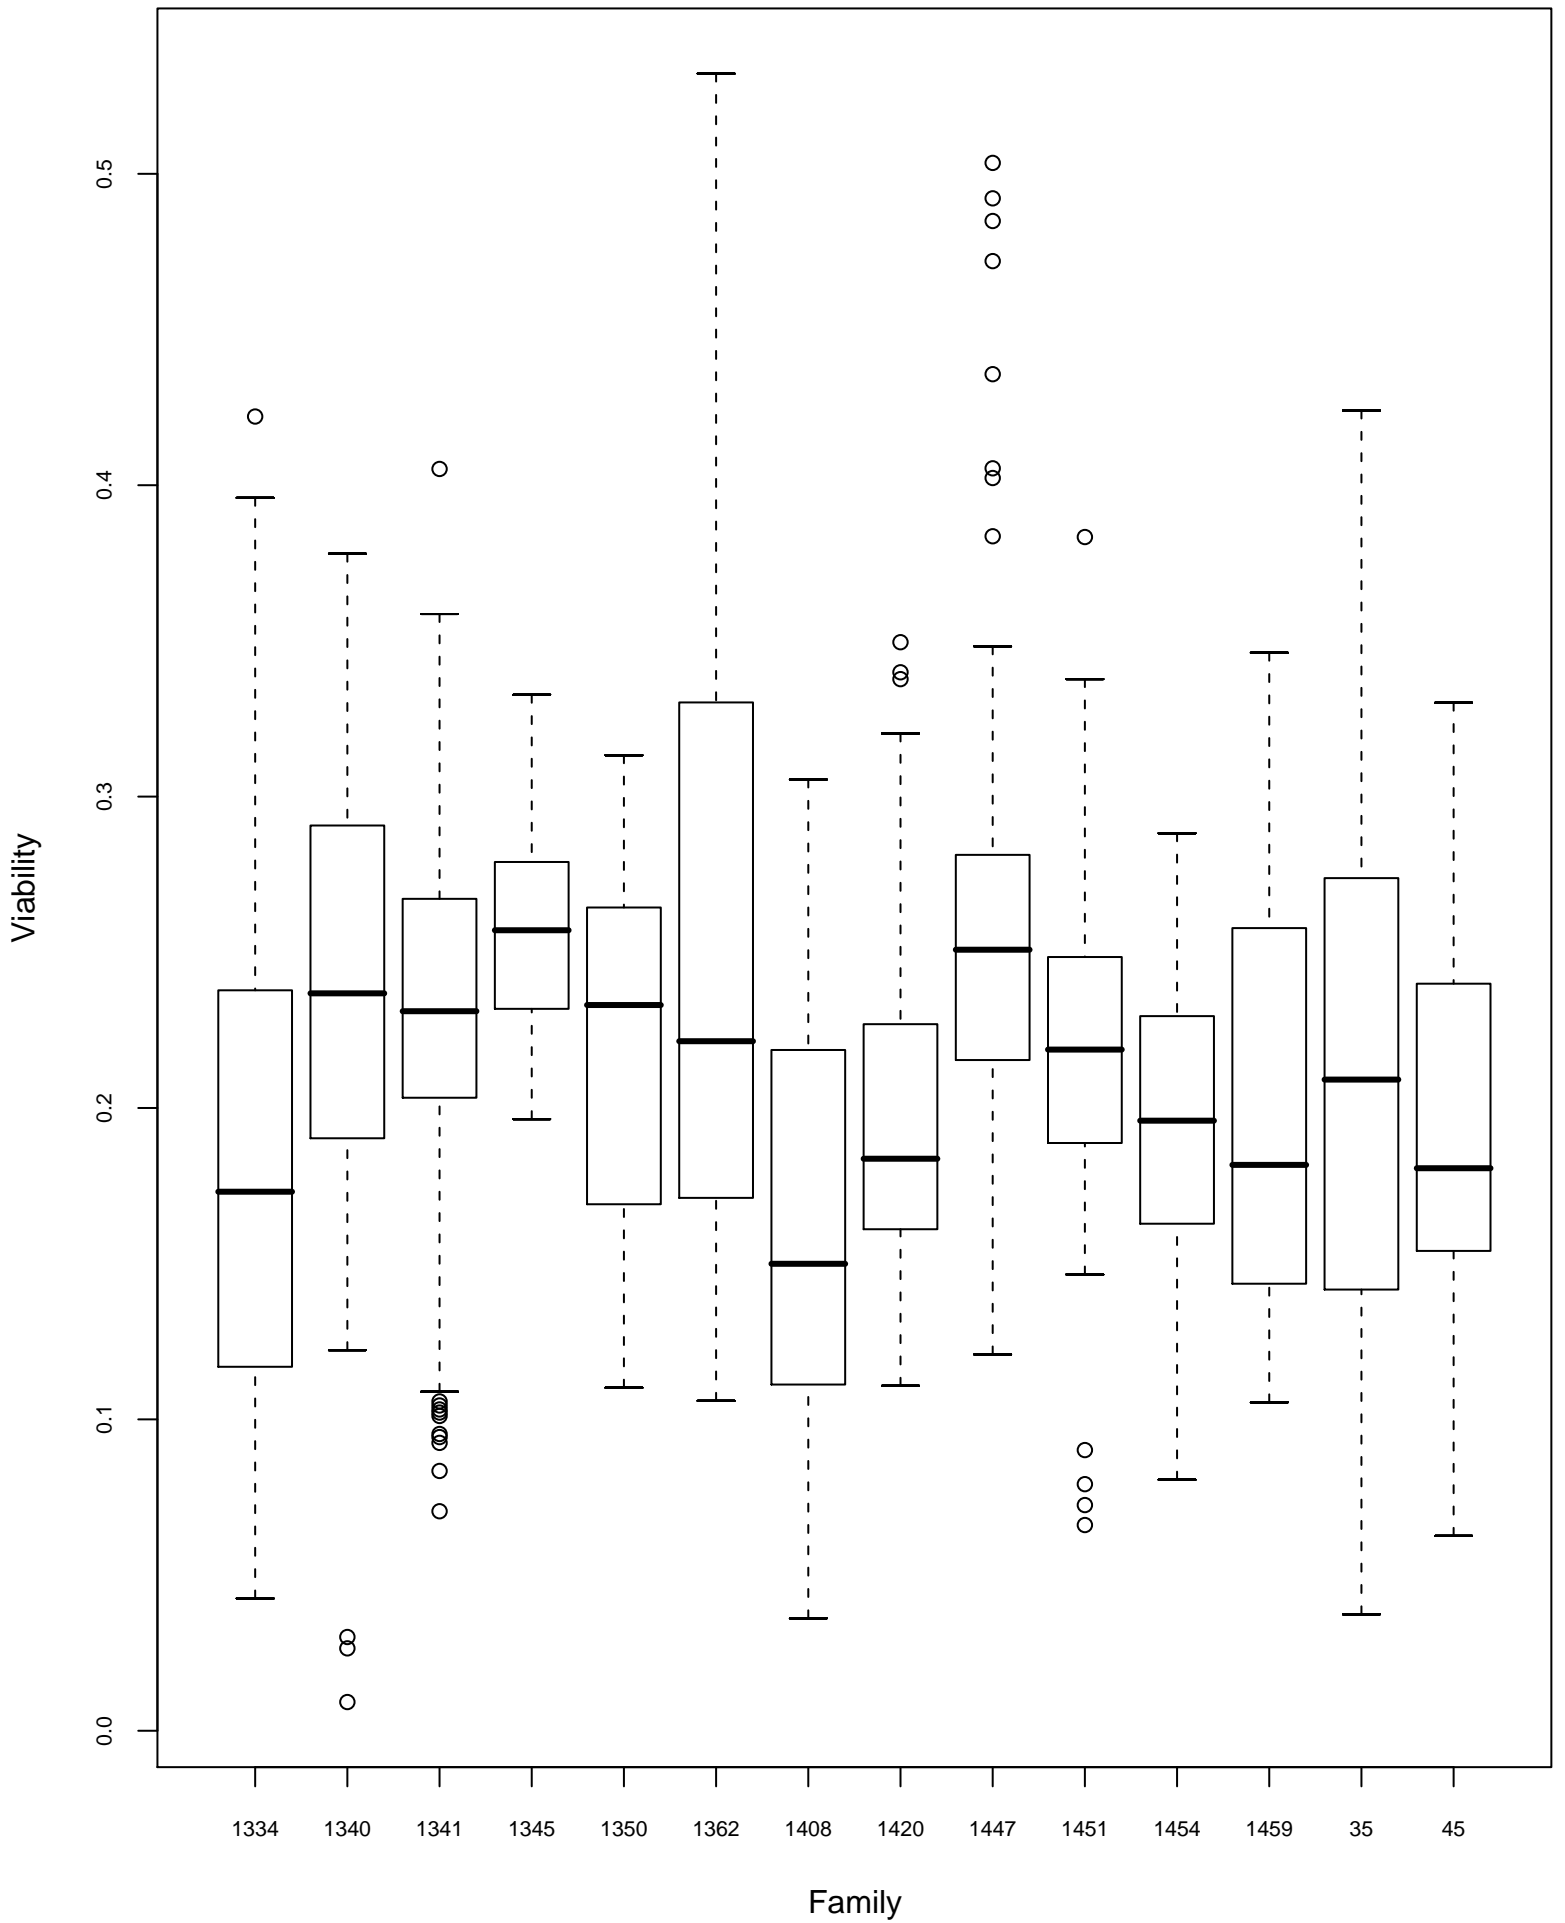

# Drug Bleo, dose 0.002 (mM)

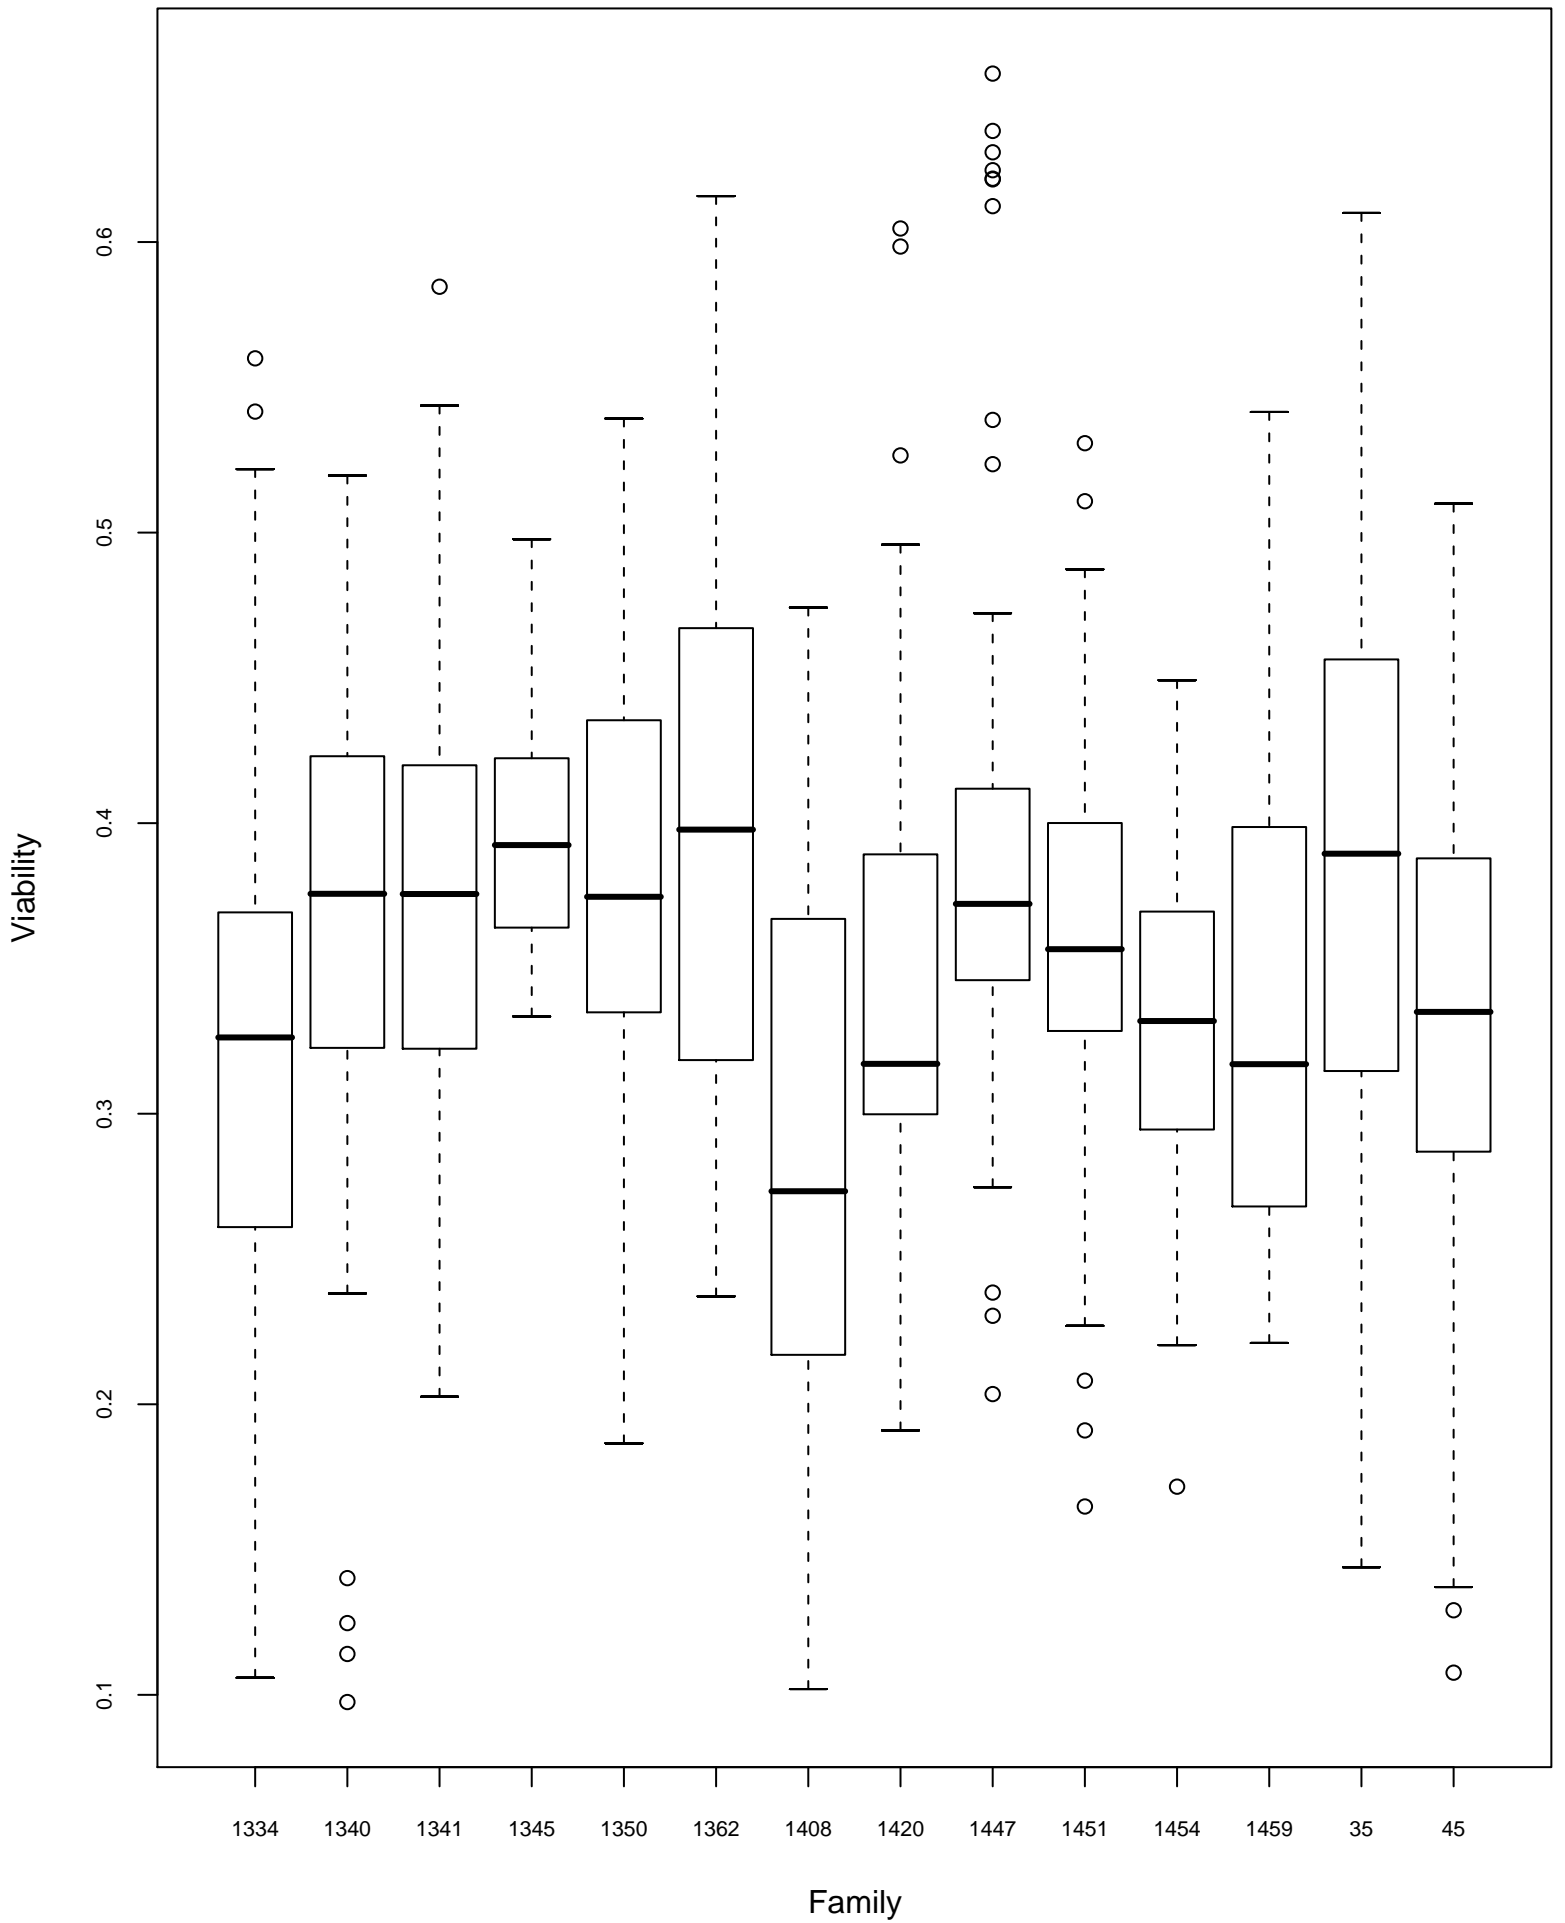

# Drug Bleo, dose 0.0004 (mM)

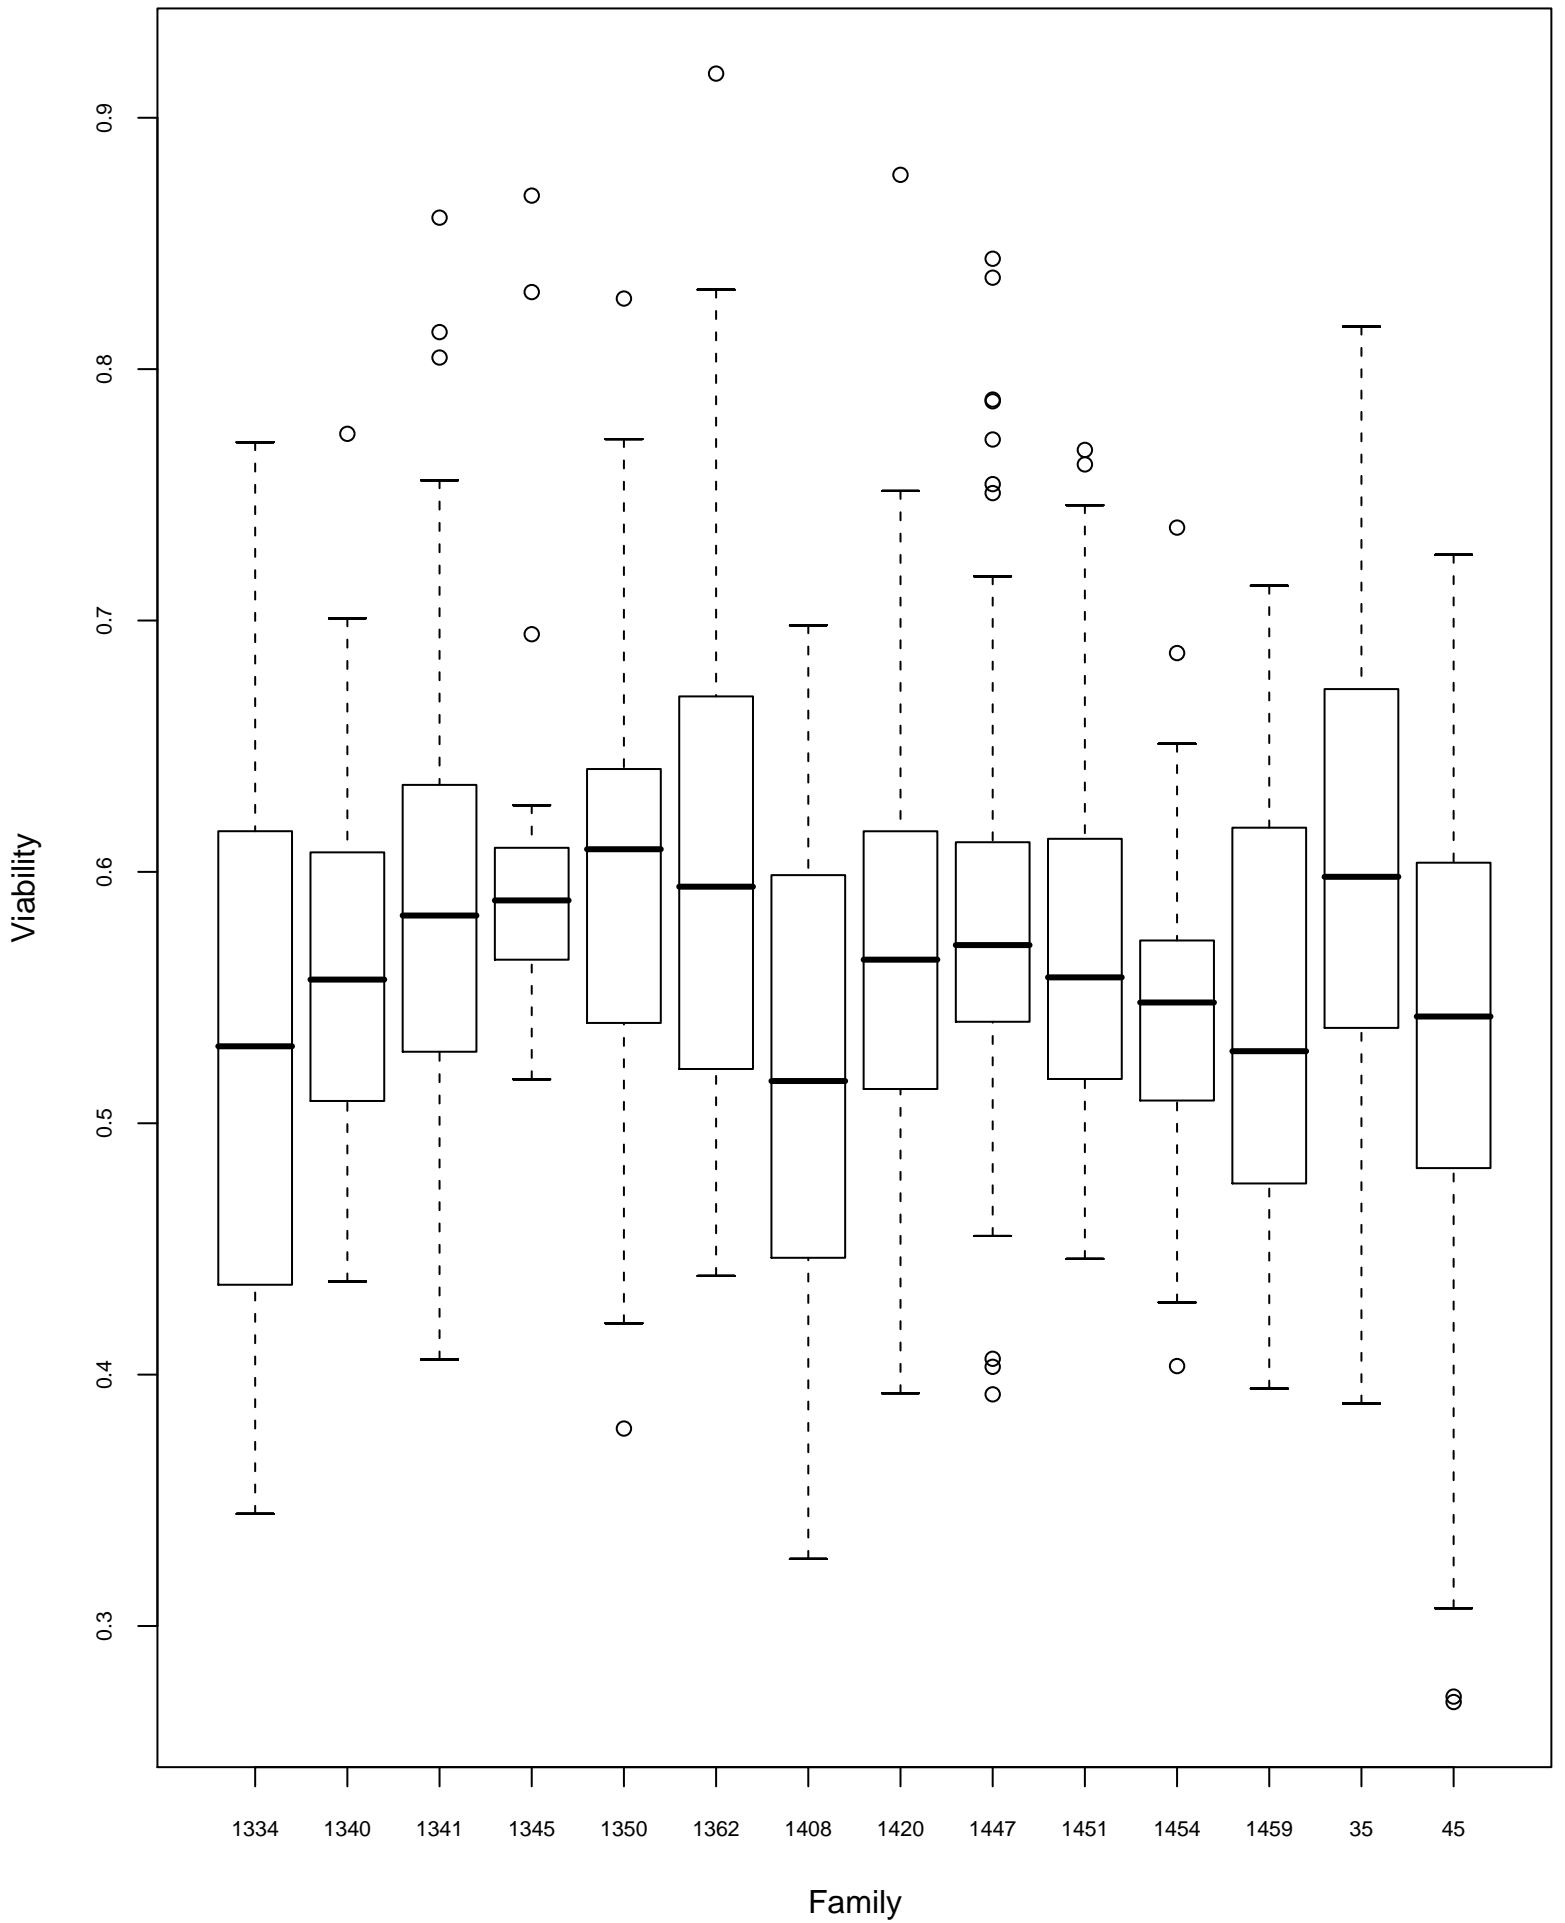

# Drug Bleo, dose 8e-05 (mM)

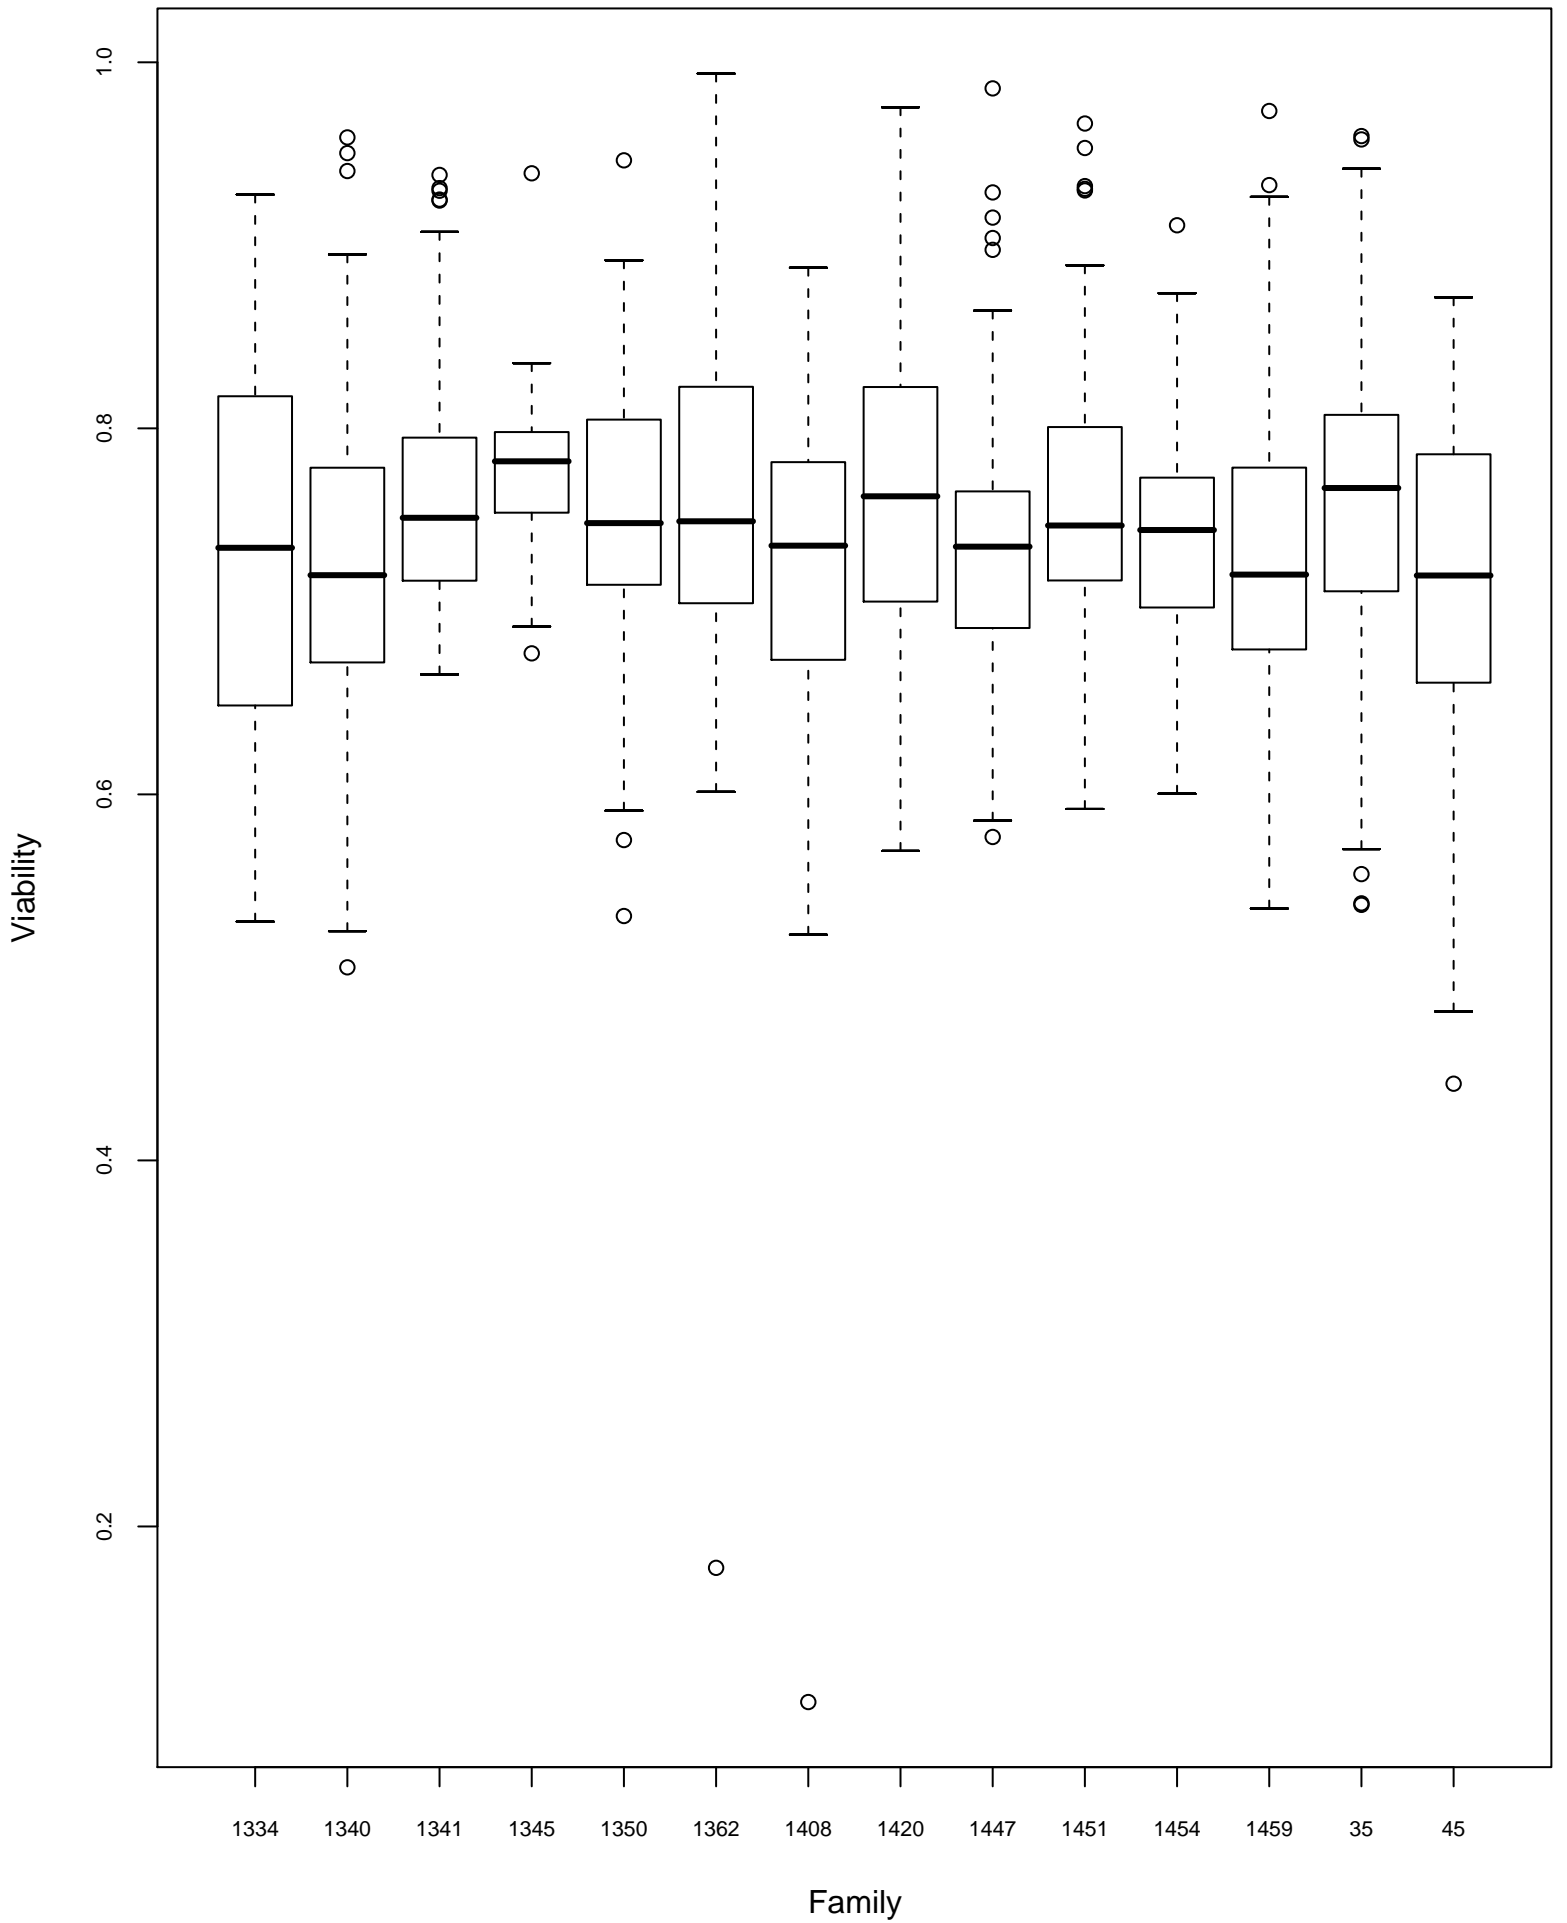



# Drug Busulf, dose 0.1 (mM)

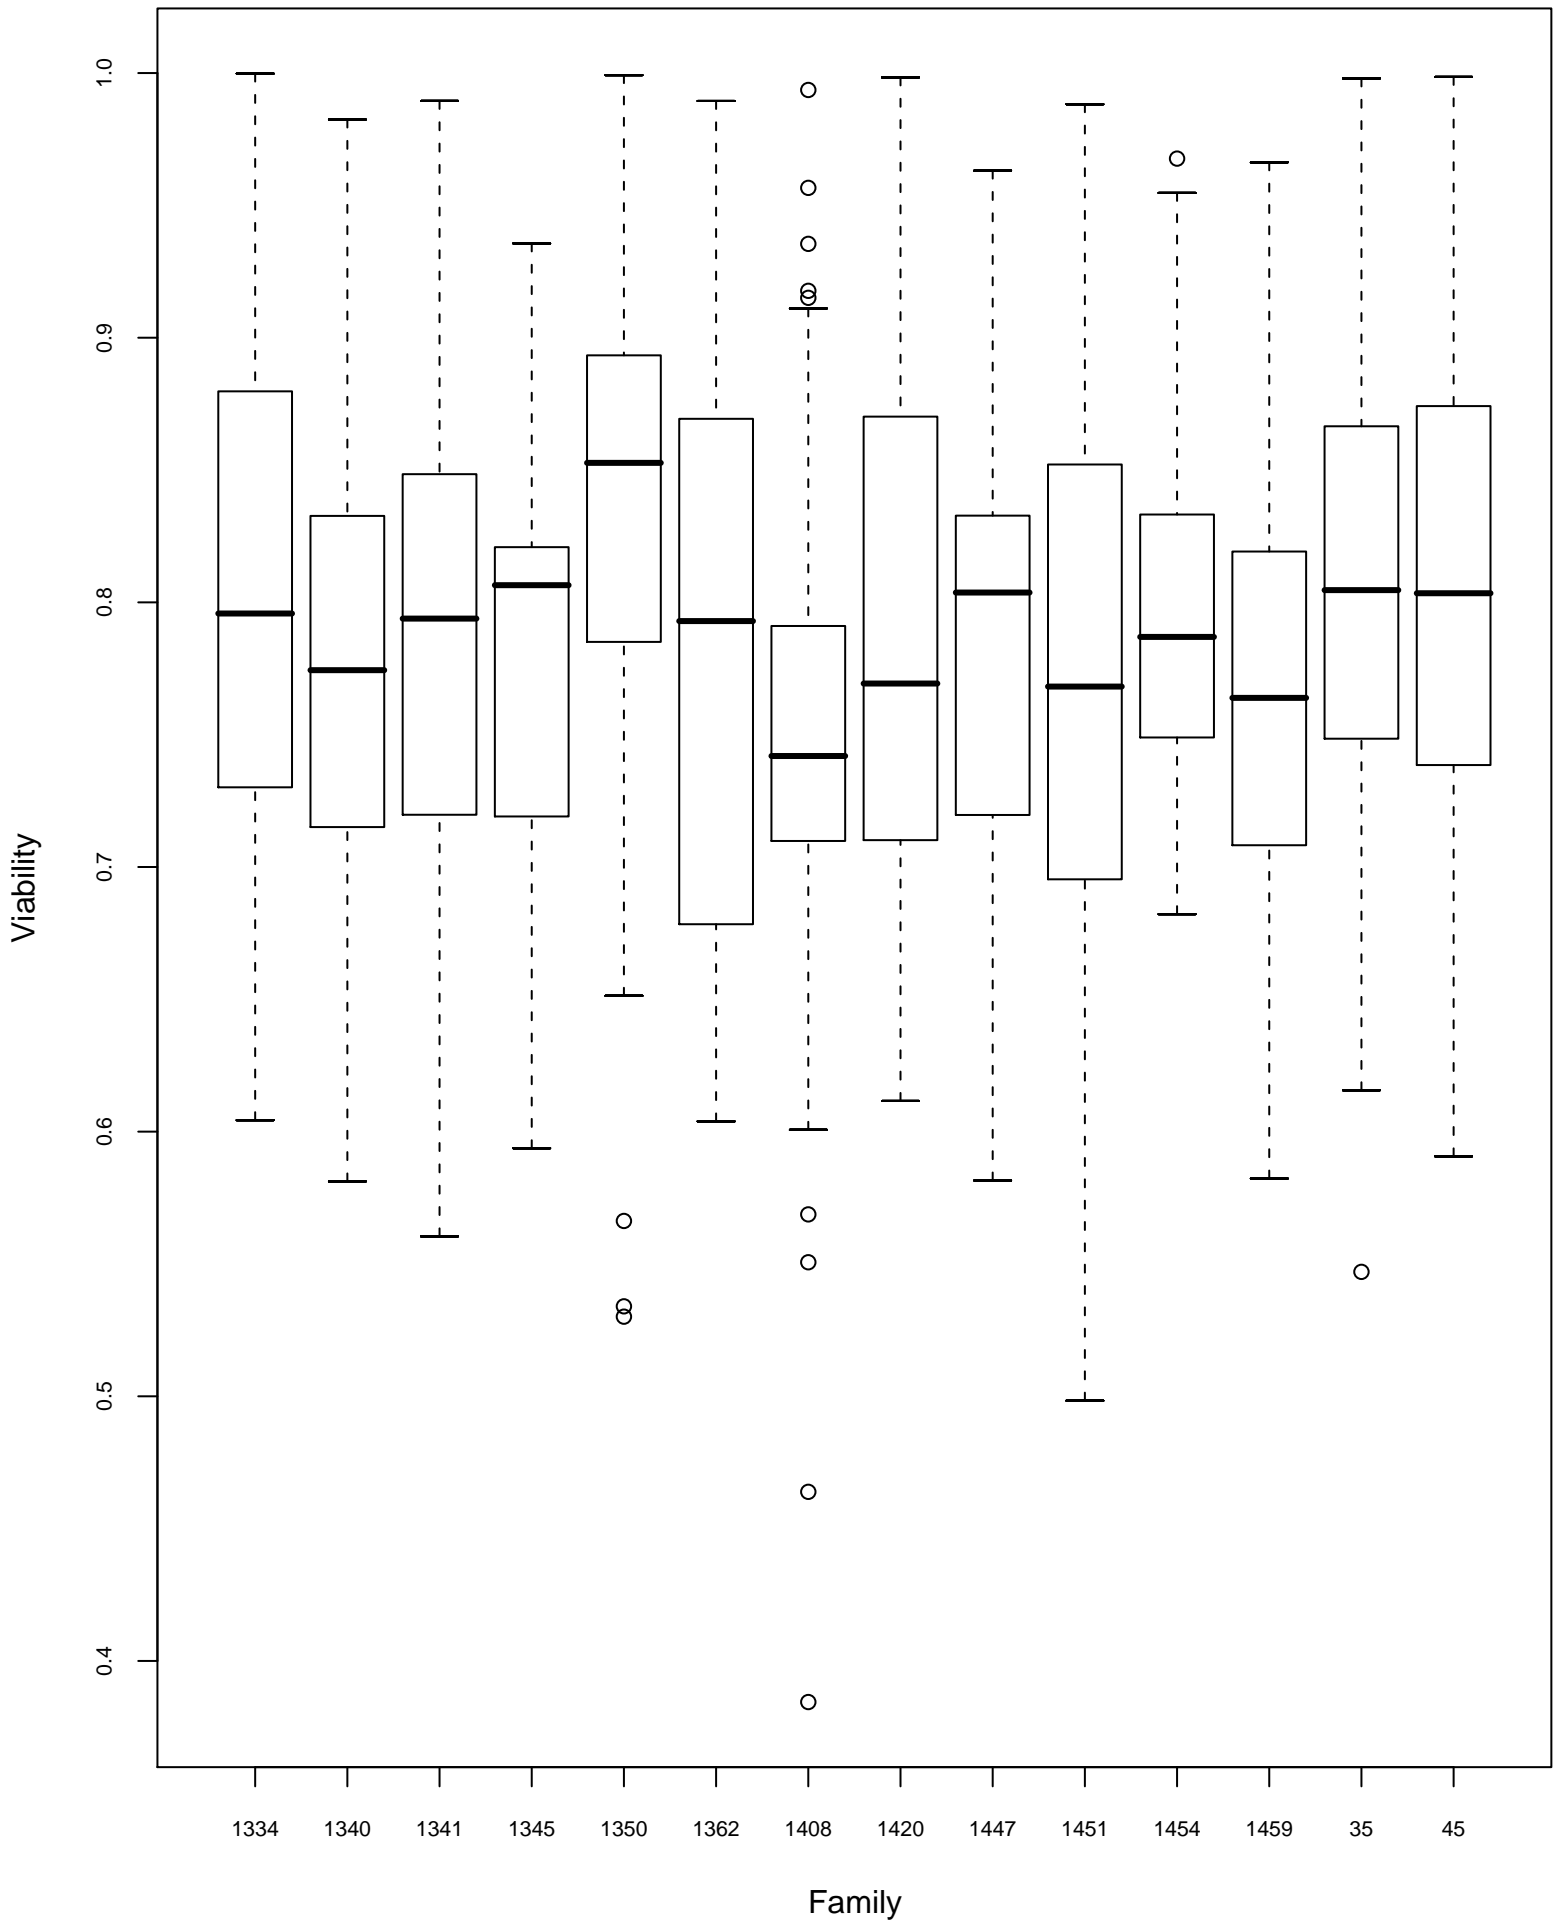

# Drug Busulf, dose 0.05 (mM)

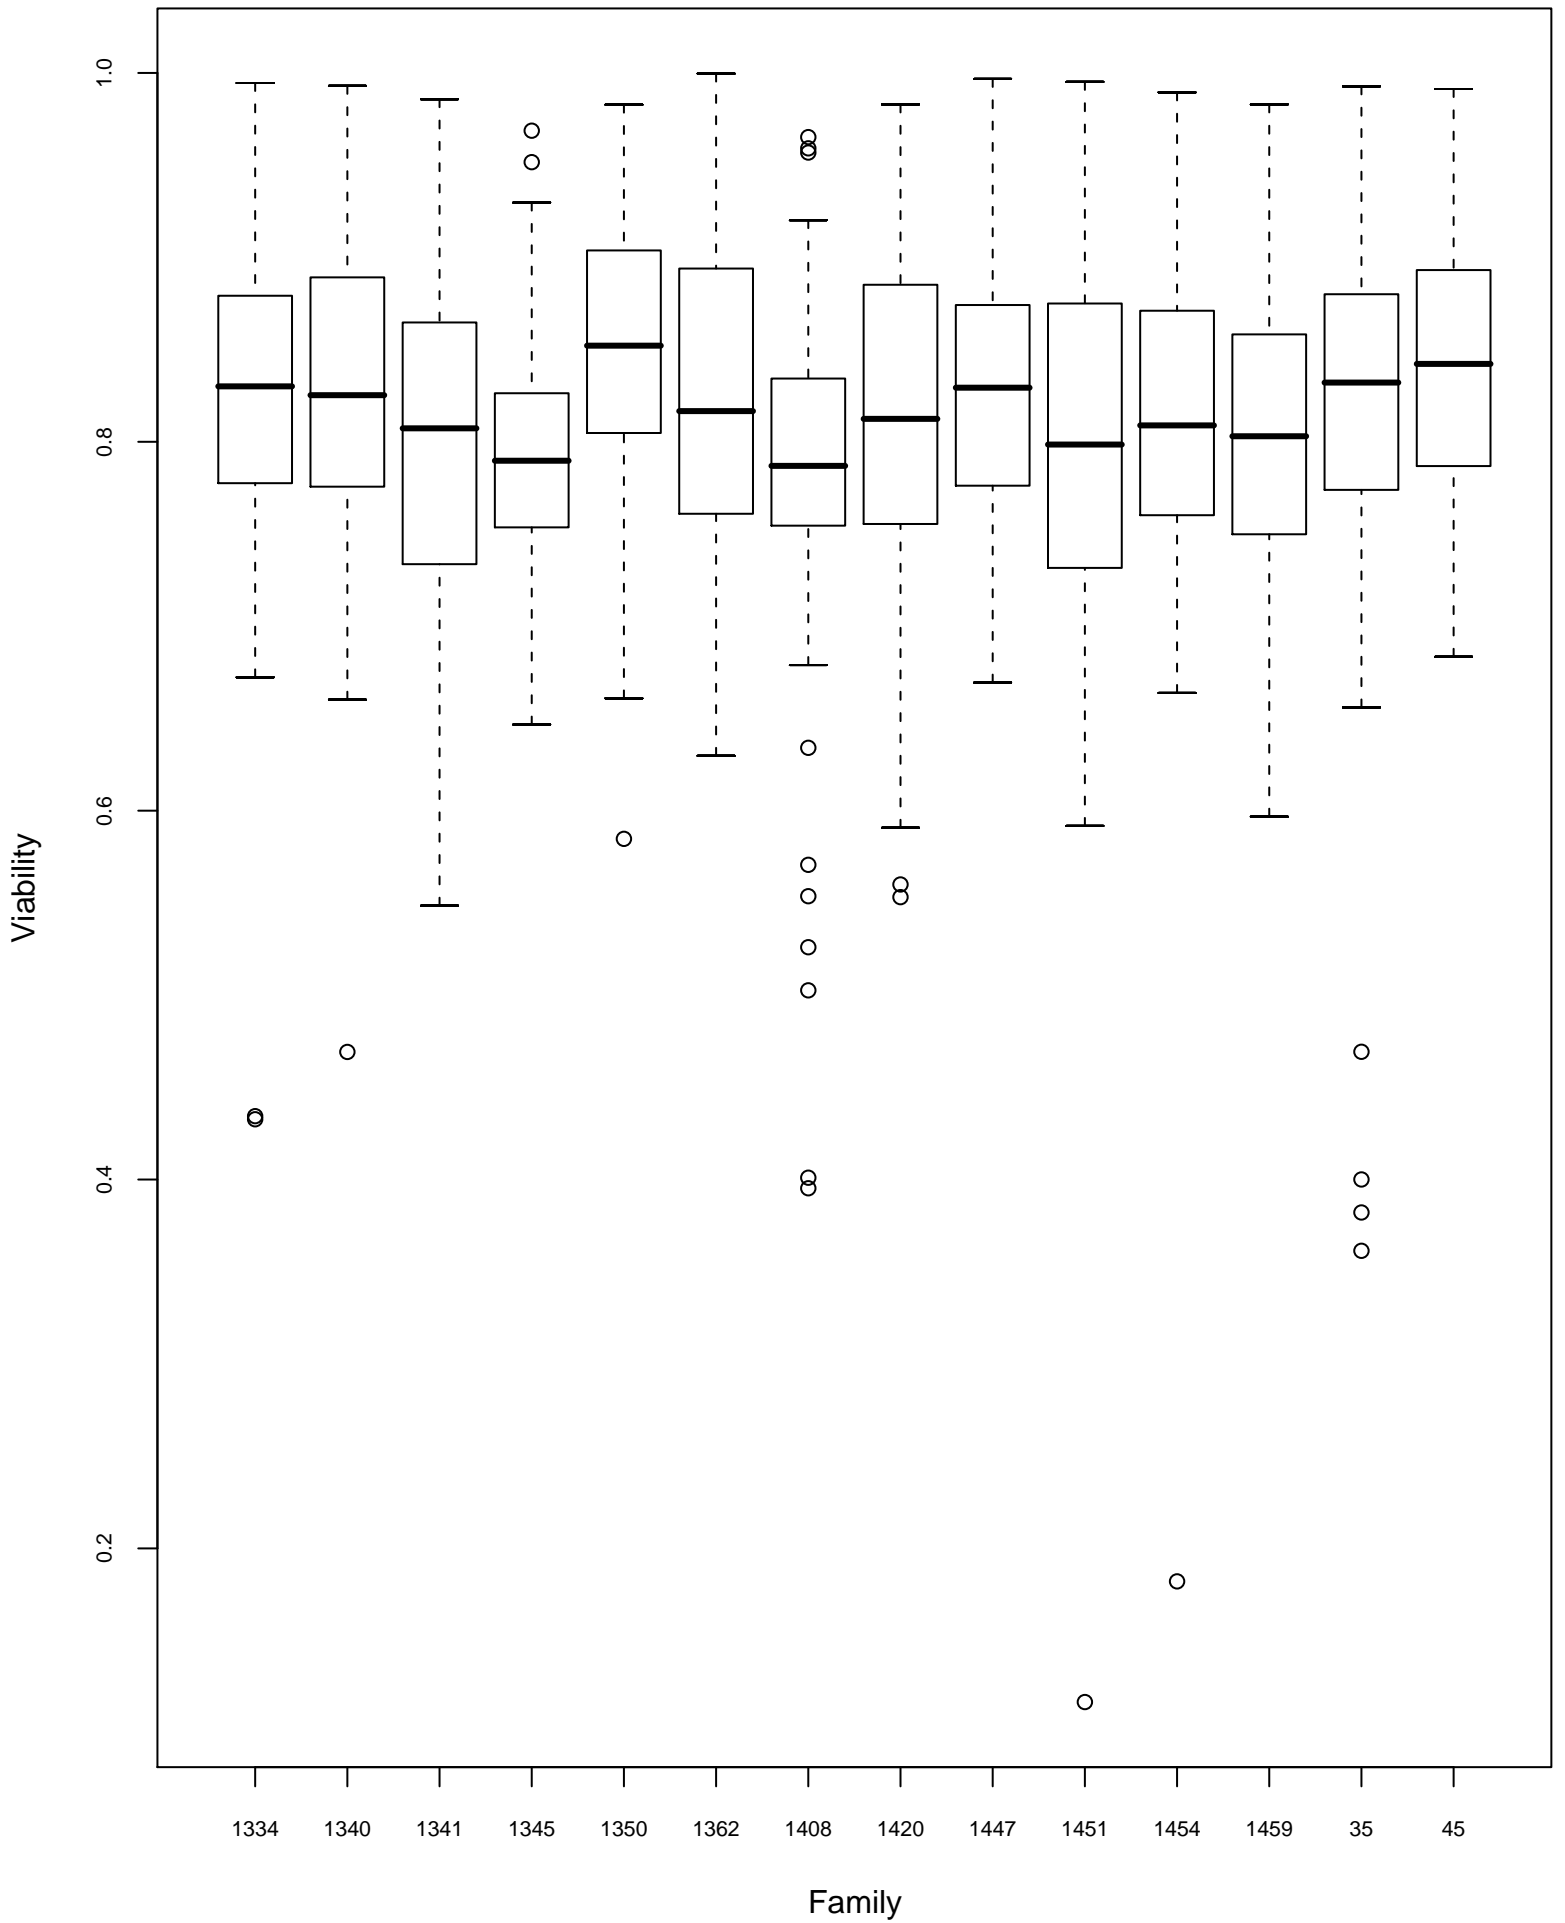

# Drug Busulf, dose 0.025 (mM)

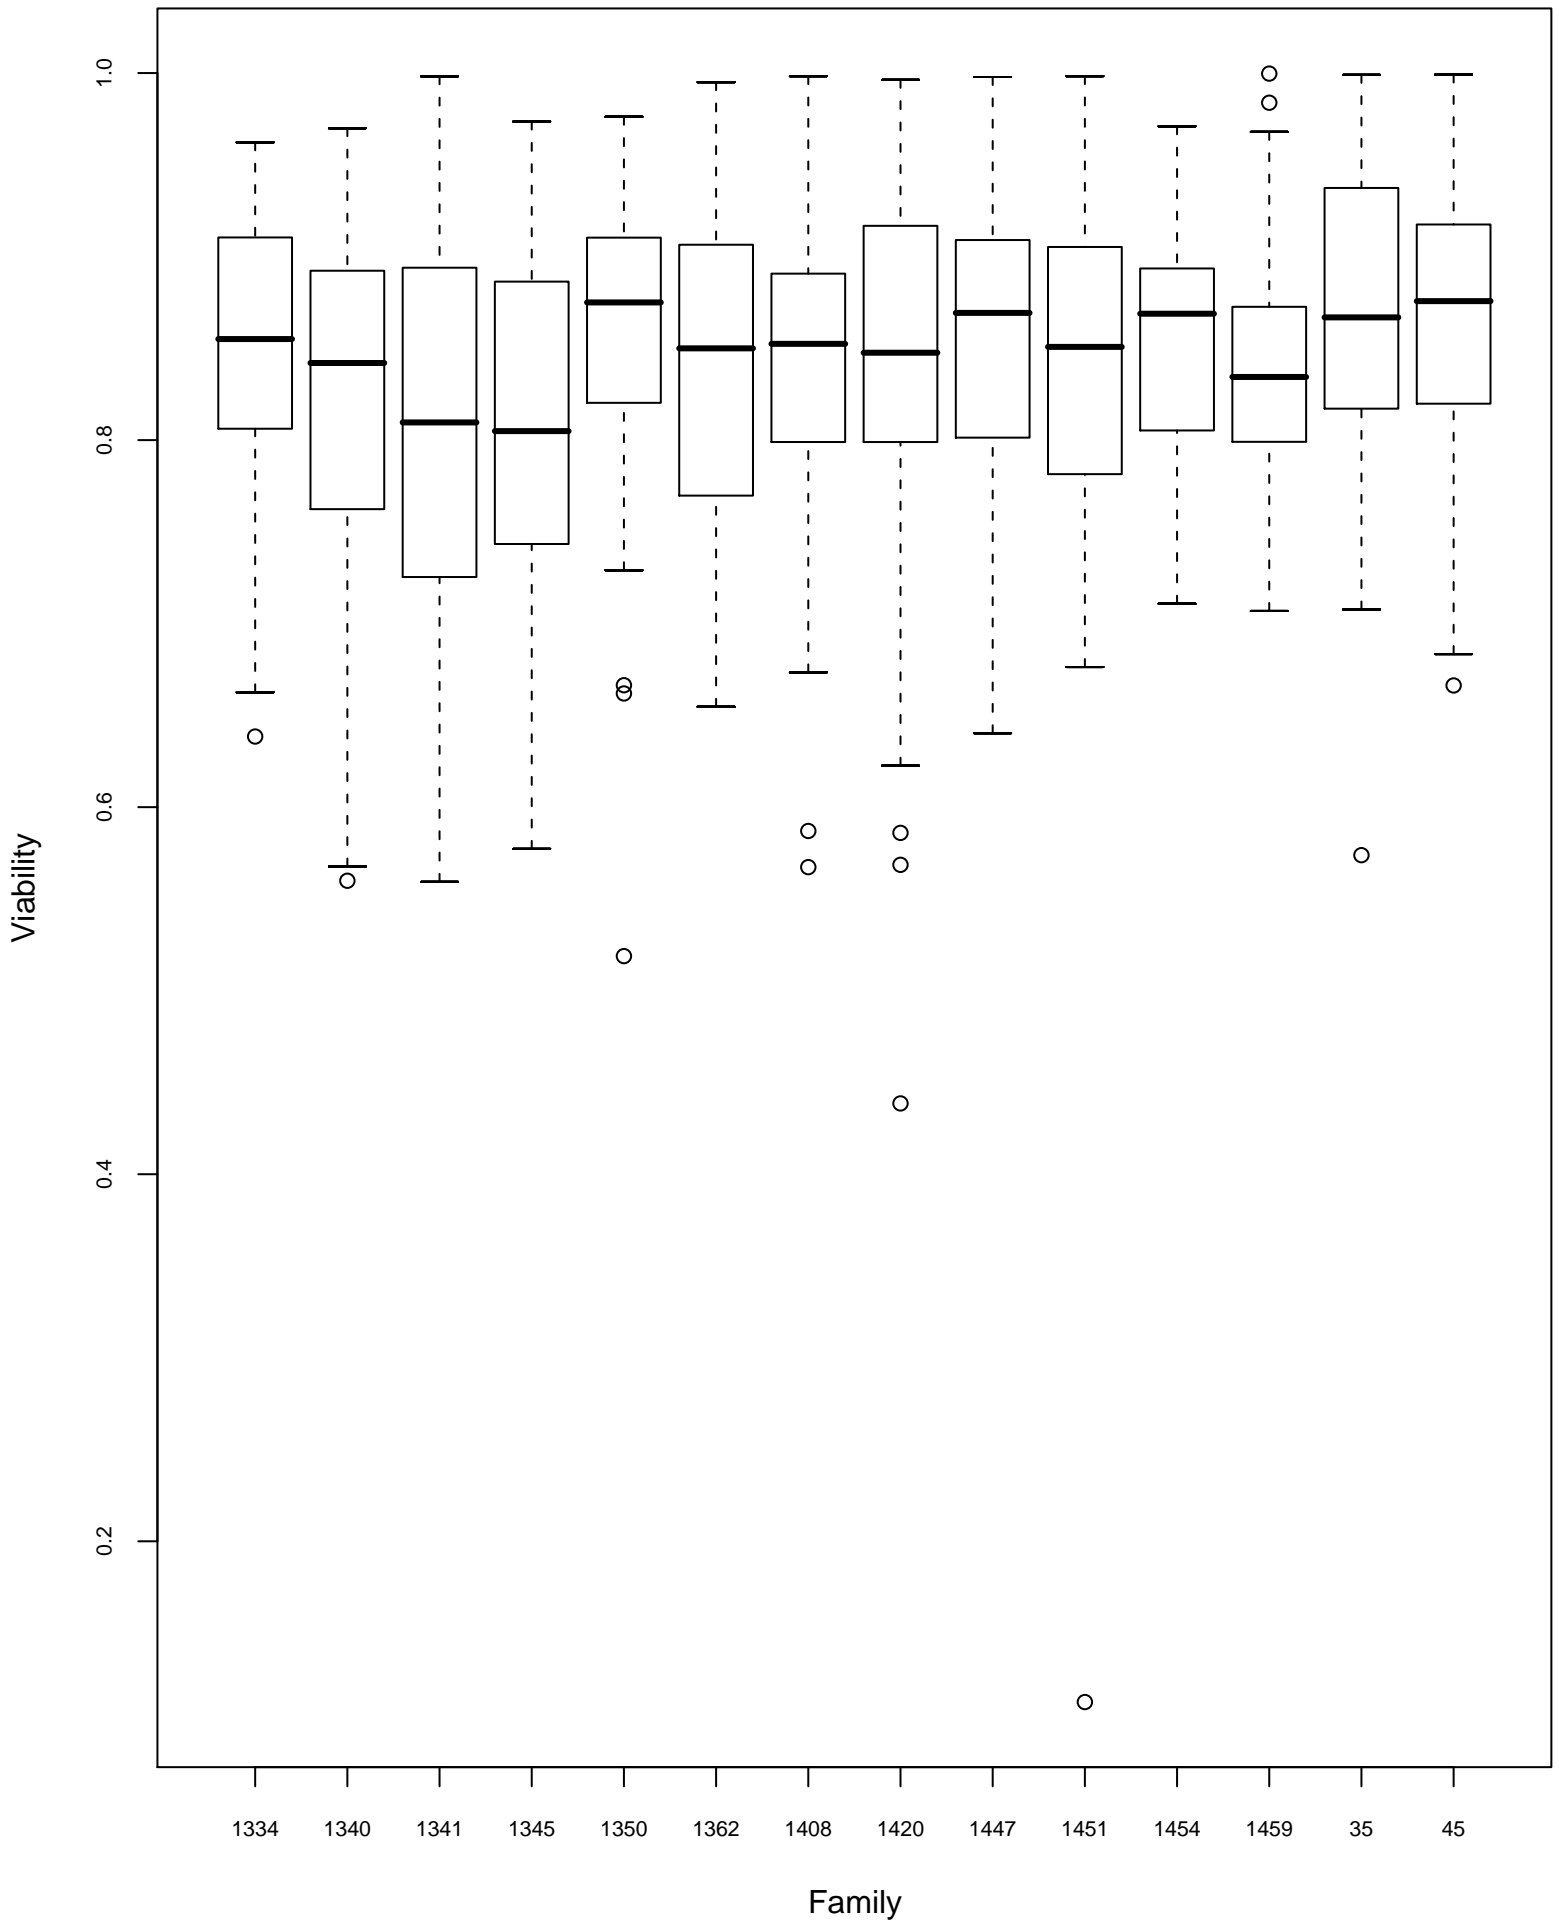

# Drug Busulf, dose 0.0125 (mM)

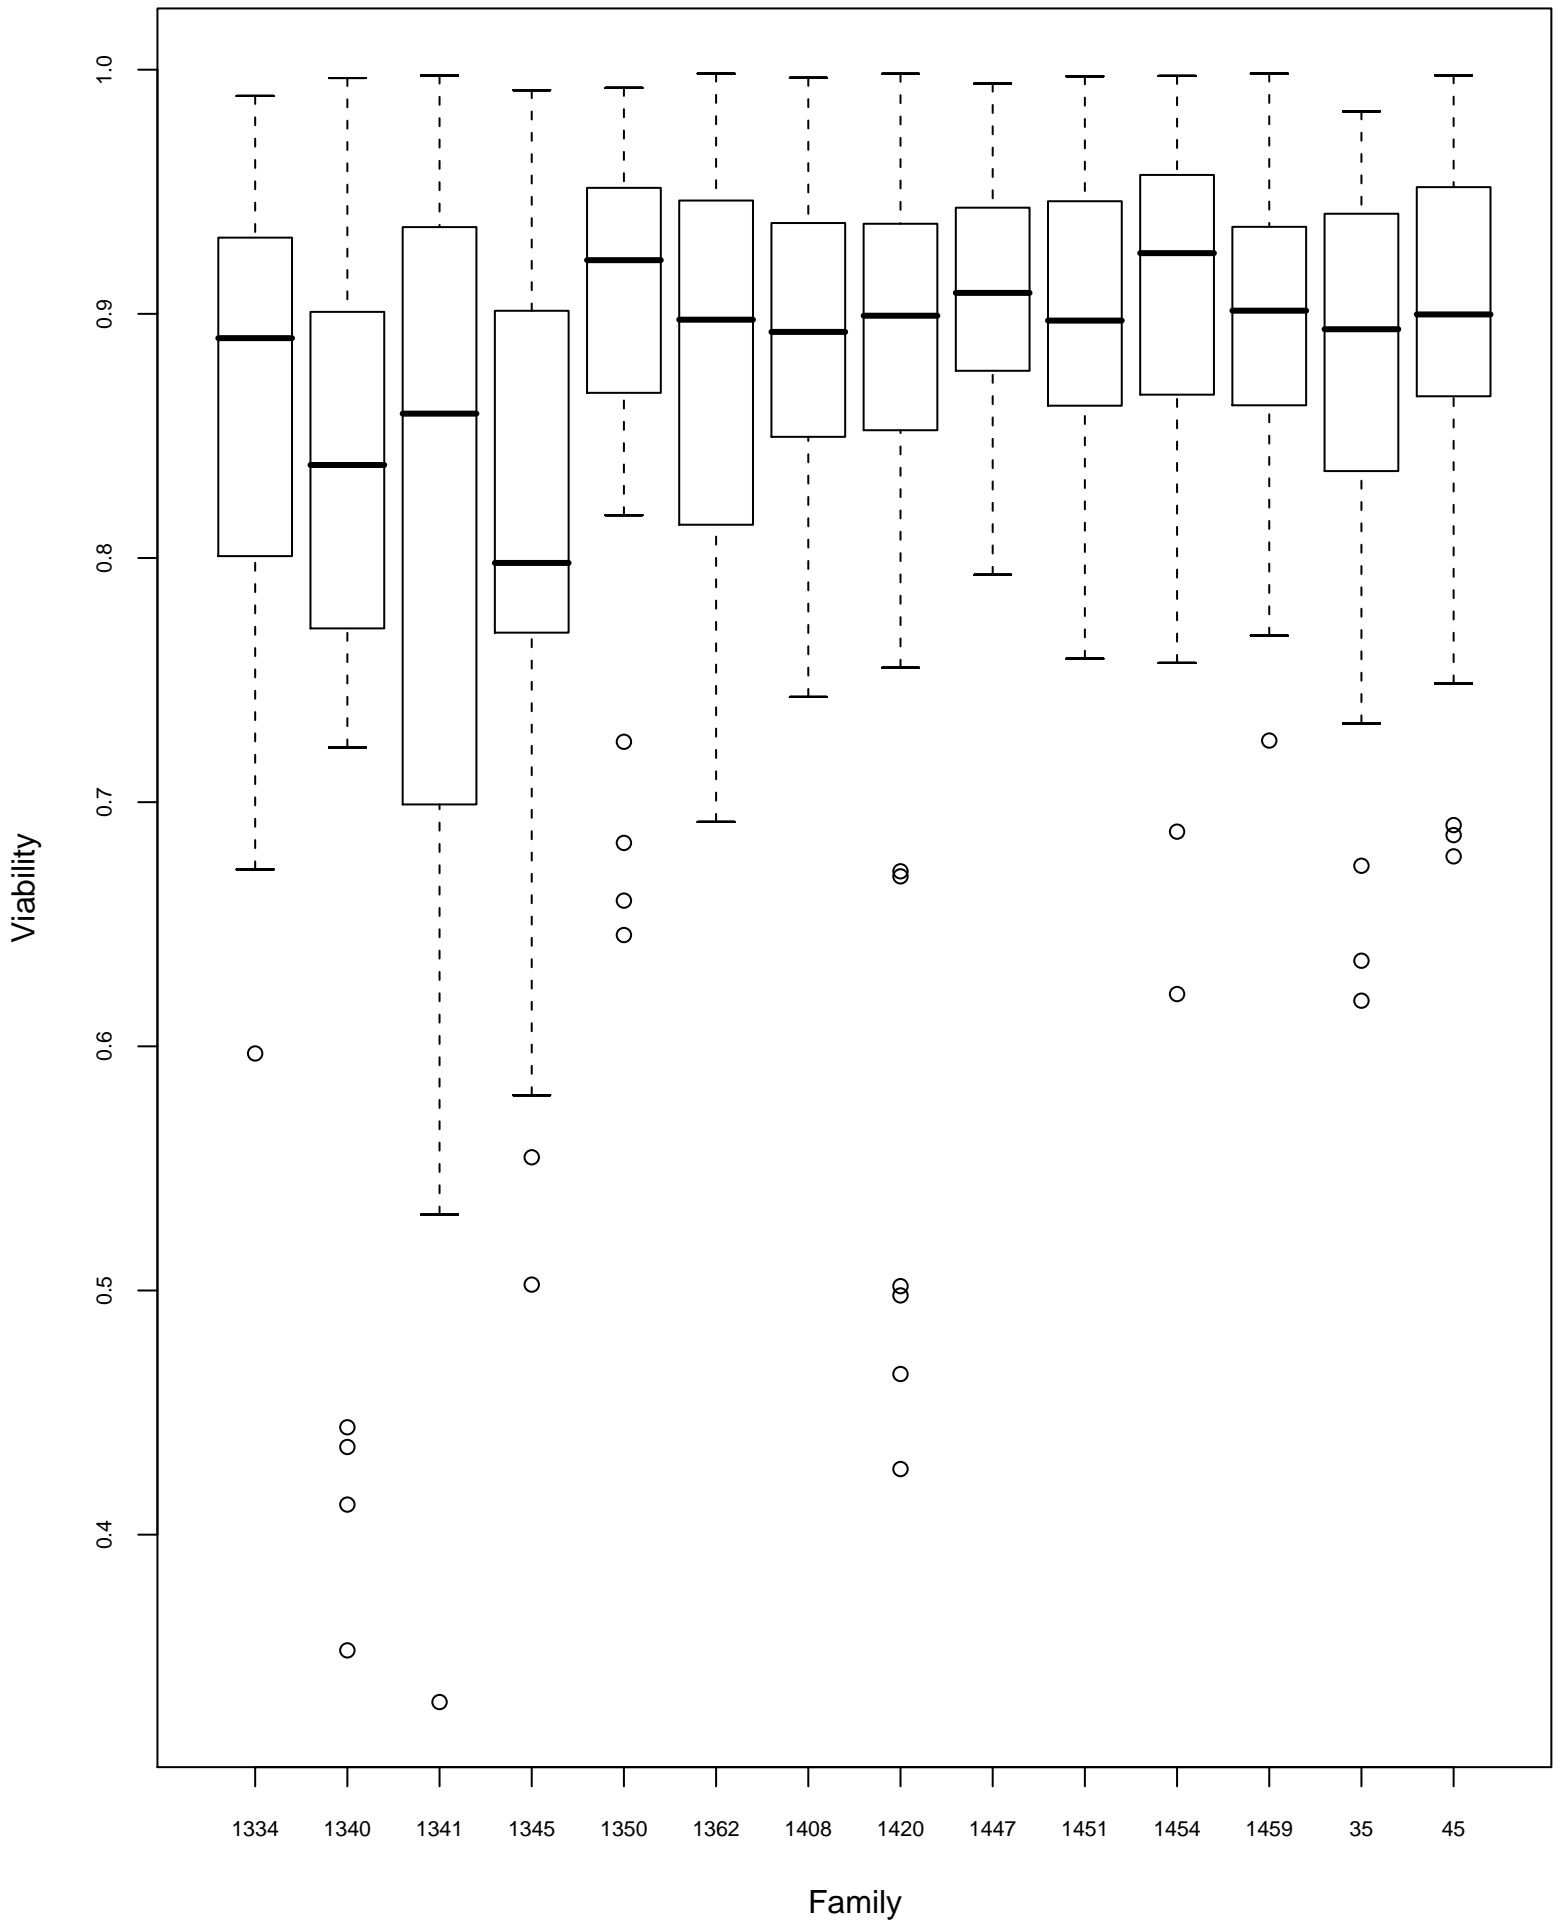

# Drug Carbo, dose 0.02 (mM)

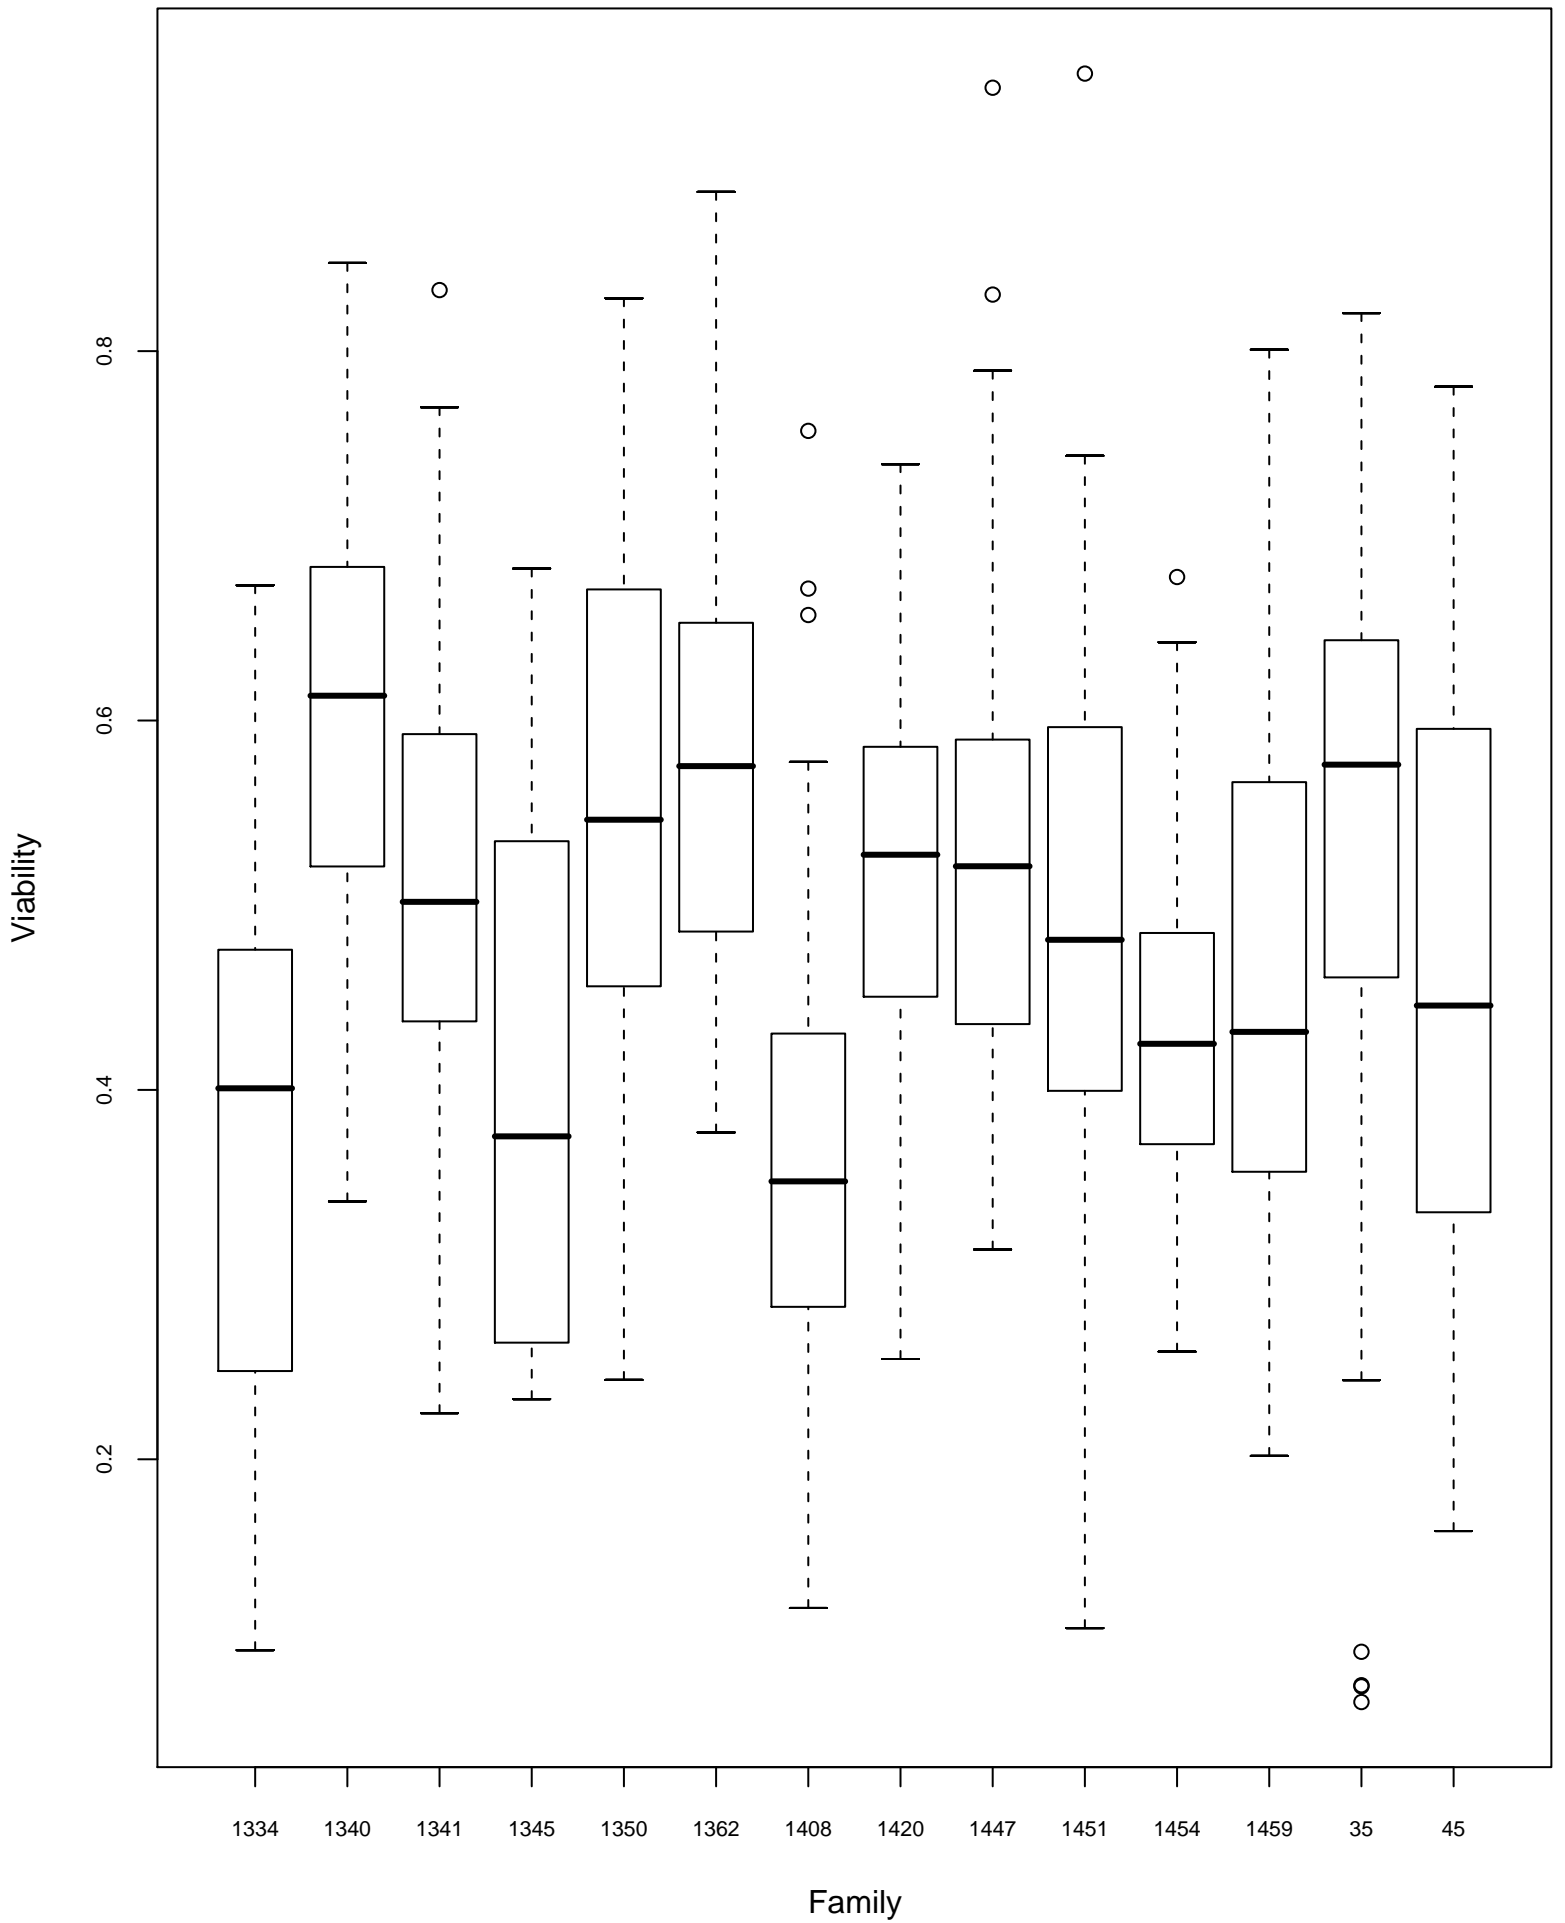

# Drug Carbo, dose 0.008 (mM)

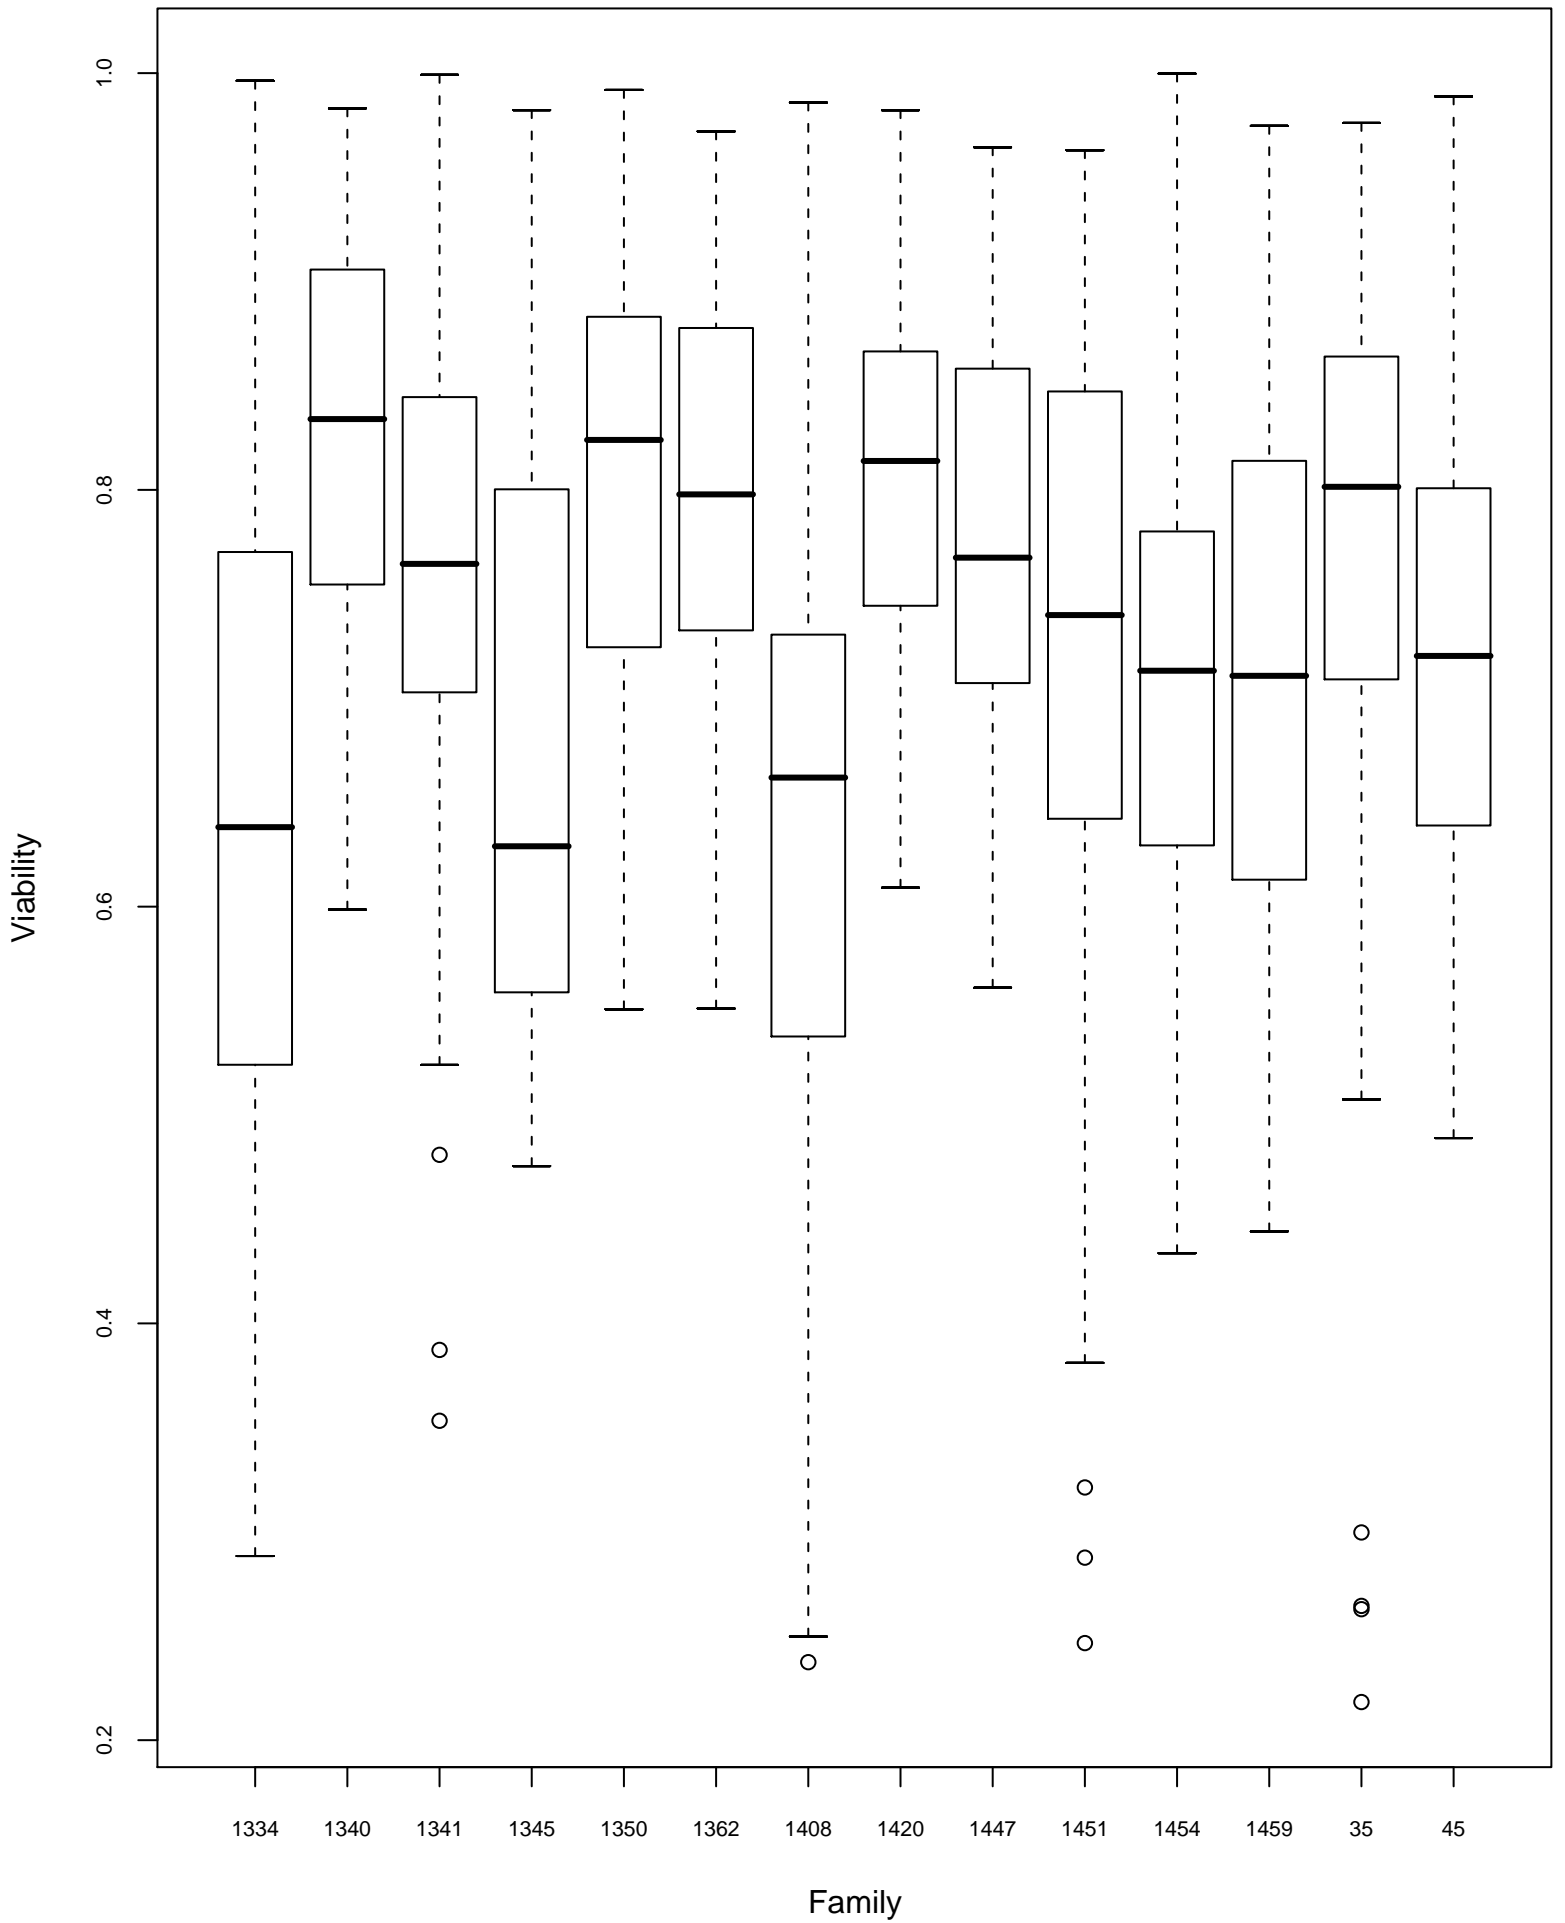

# Drug Carbo, dose 0.0032 (mM)

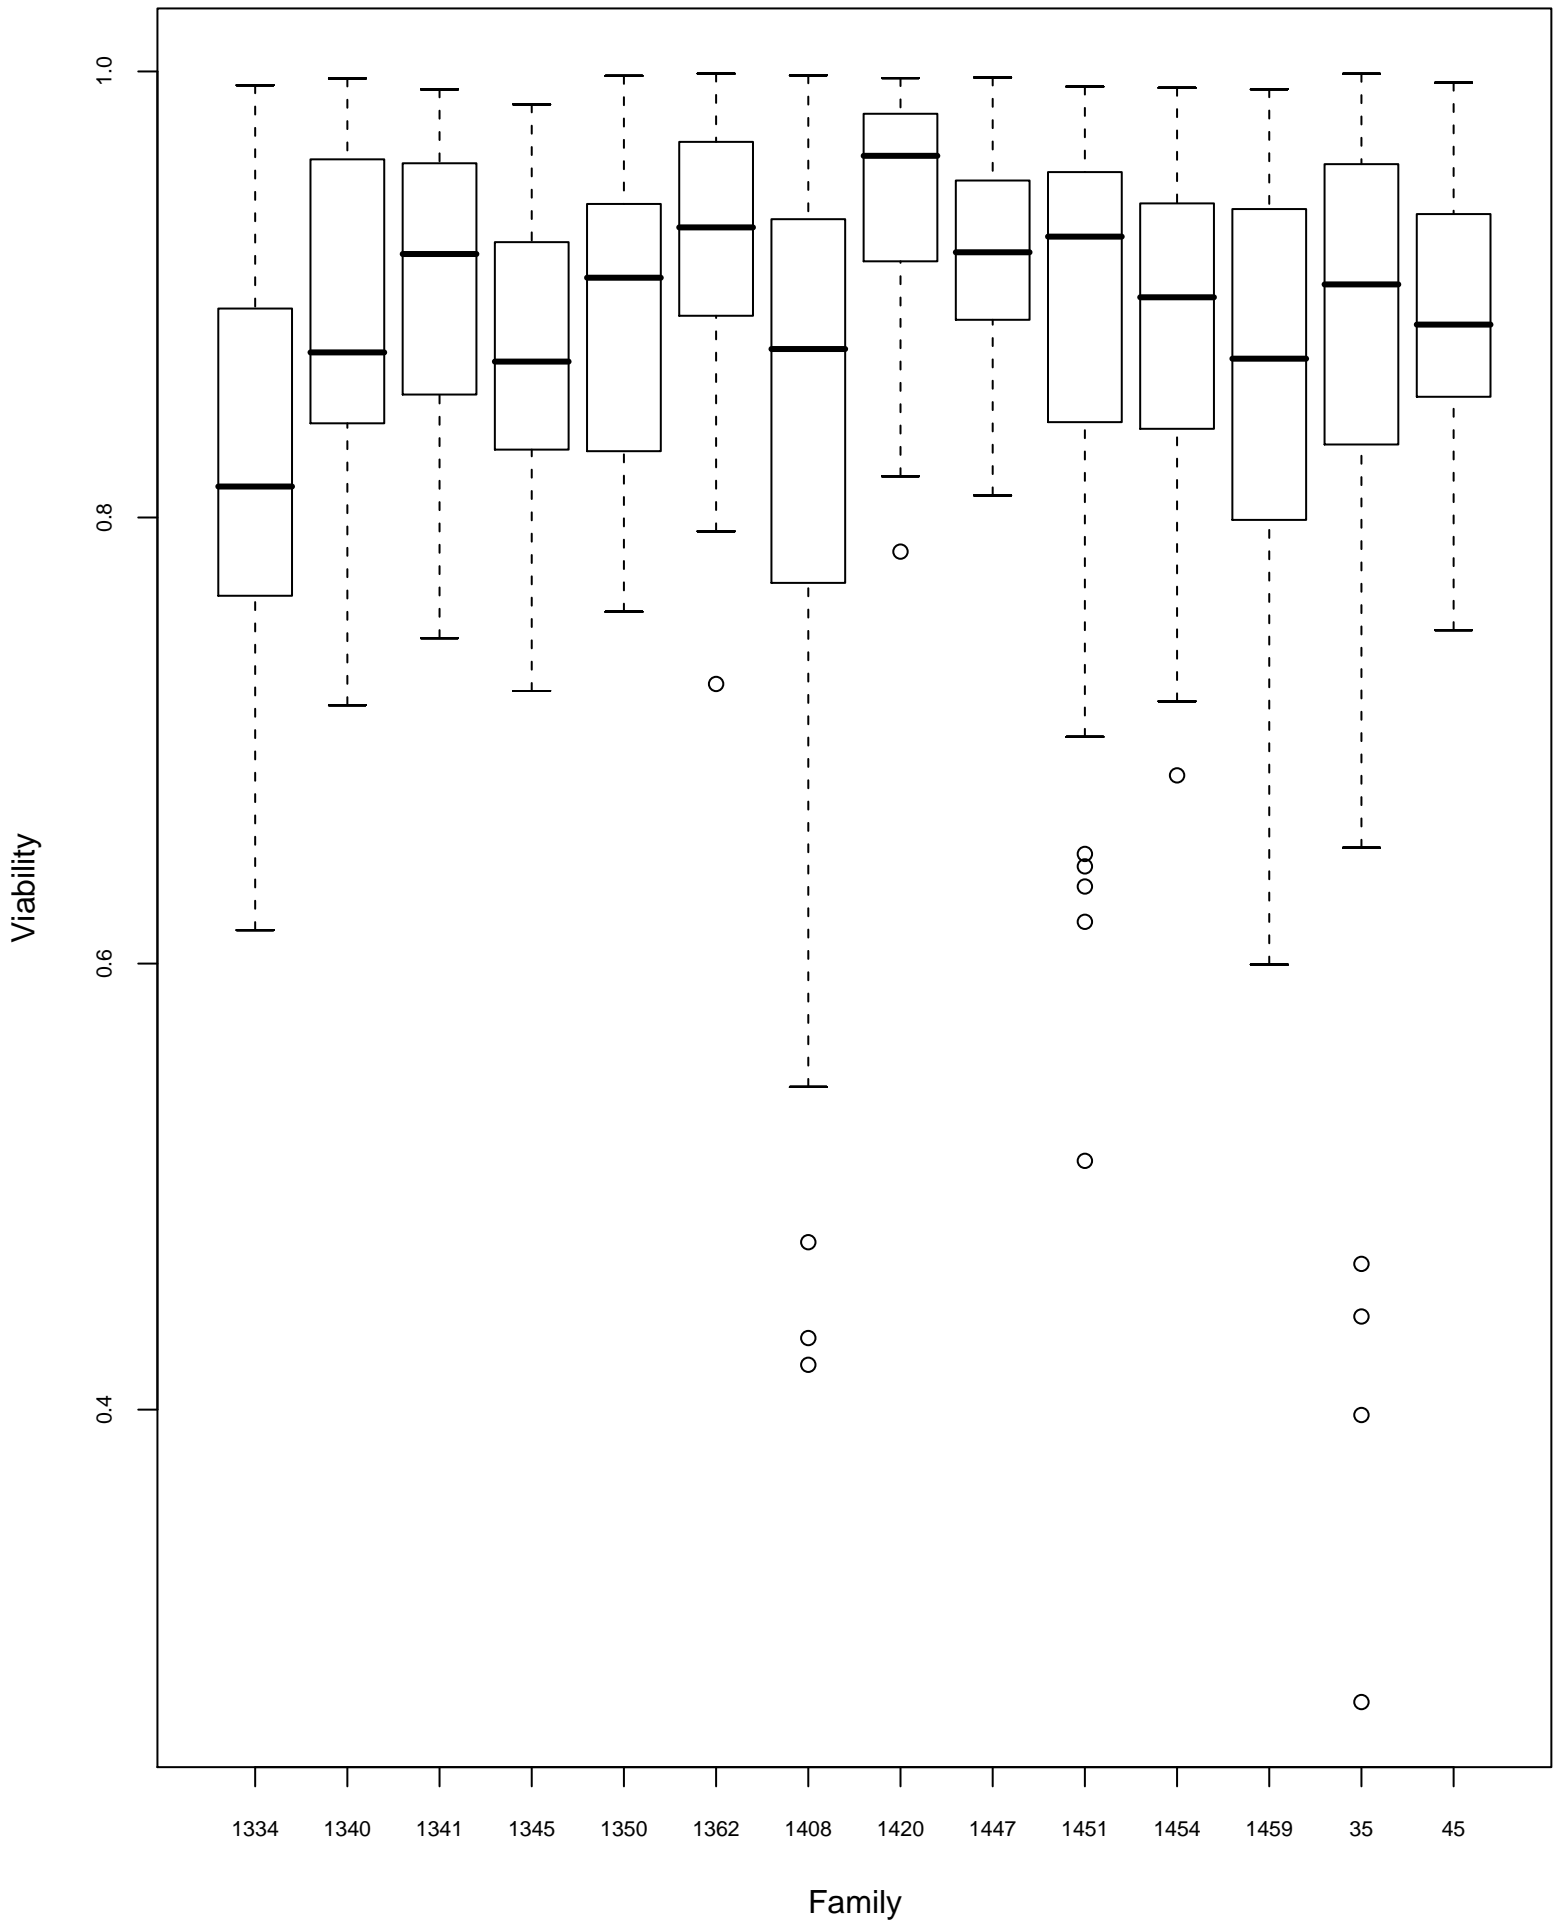

# Drug Carbo, dose 0.00128 (mM)

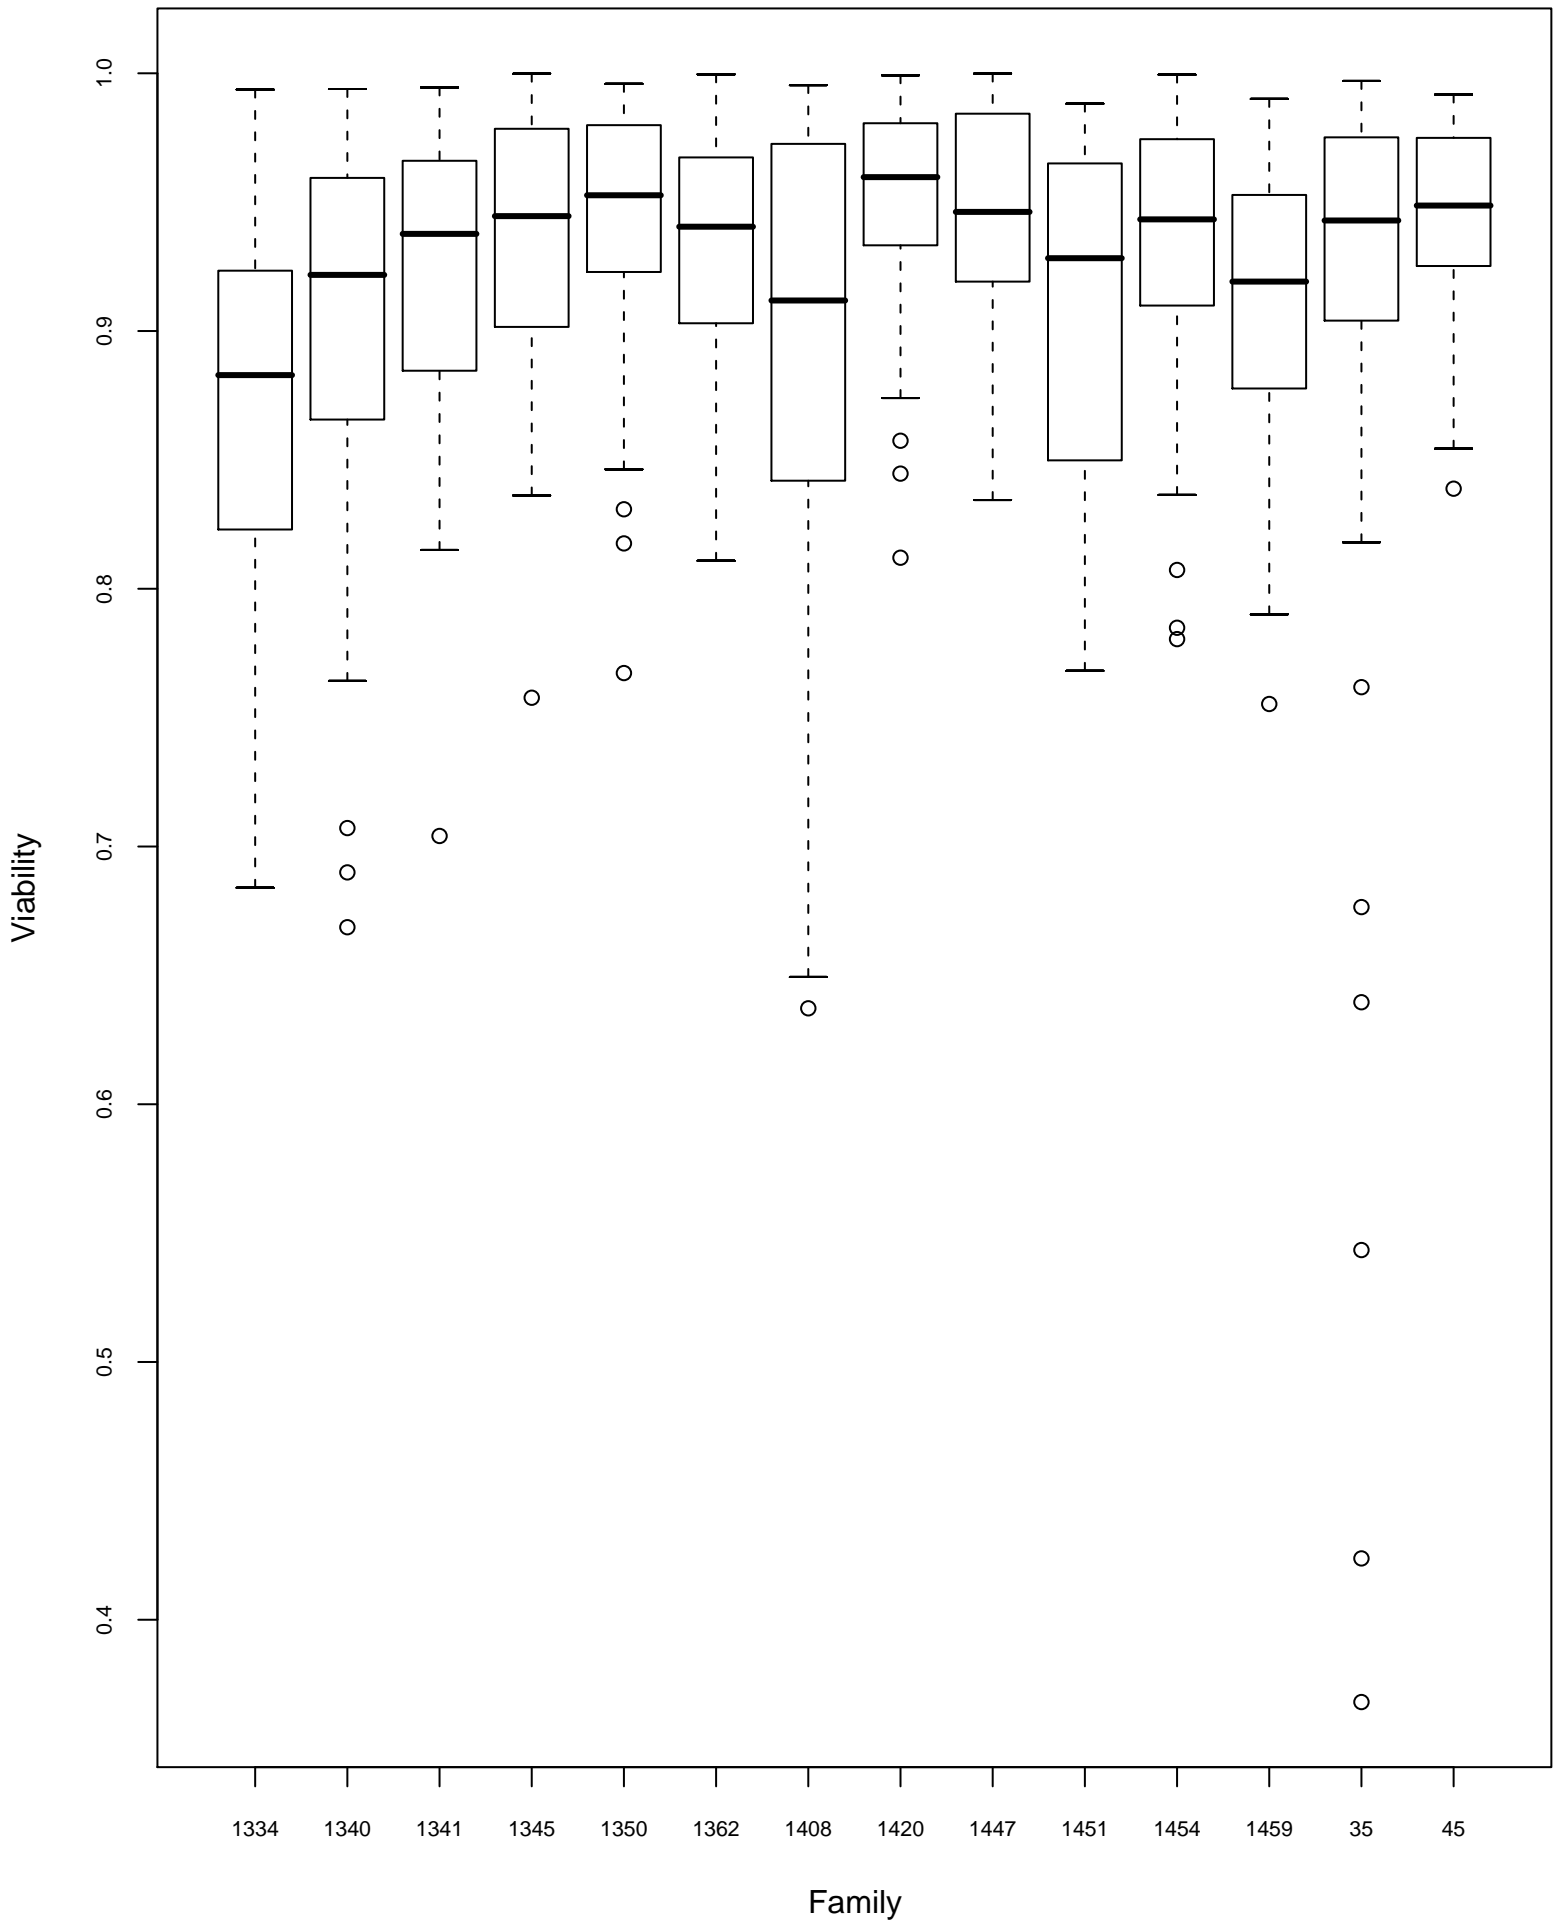



# Drug Clad, dose 0.01 (mM)

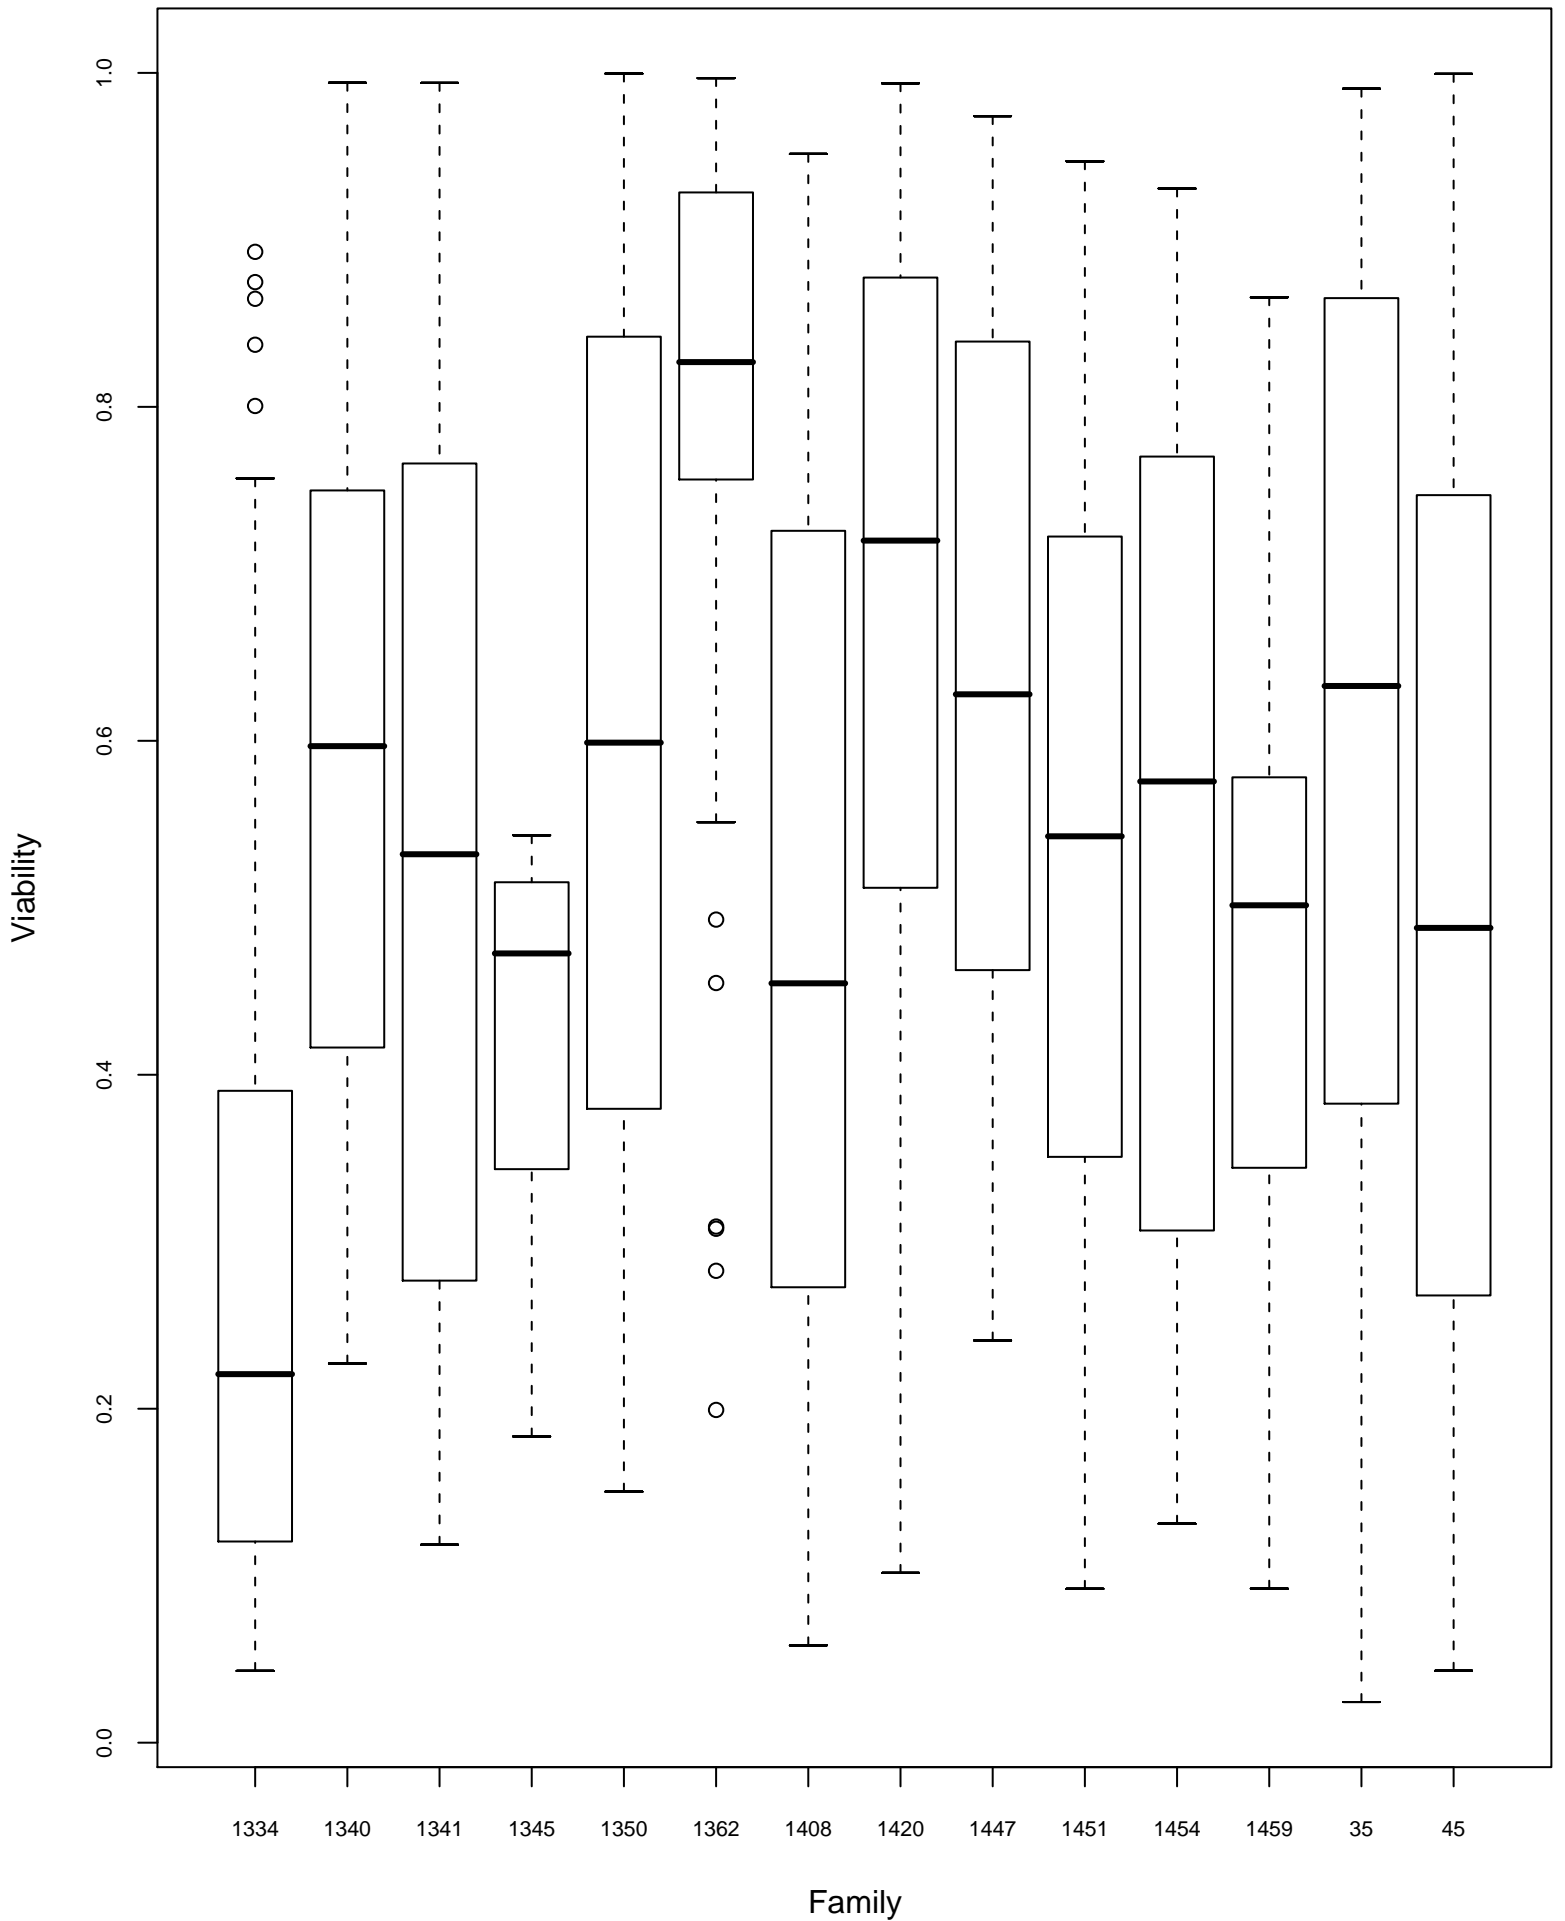

# Drug Clad, dose 0.004 (mM)

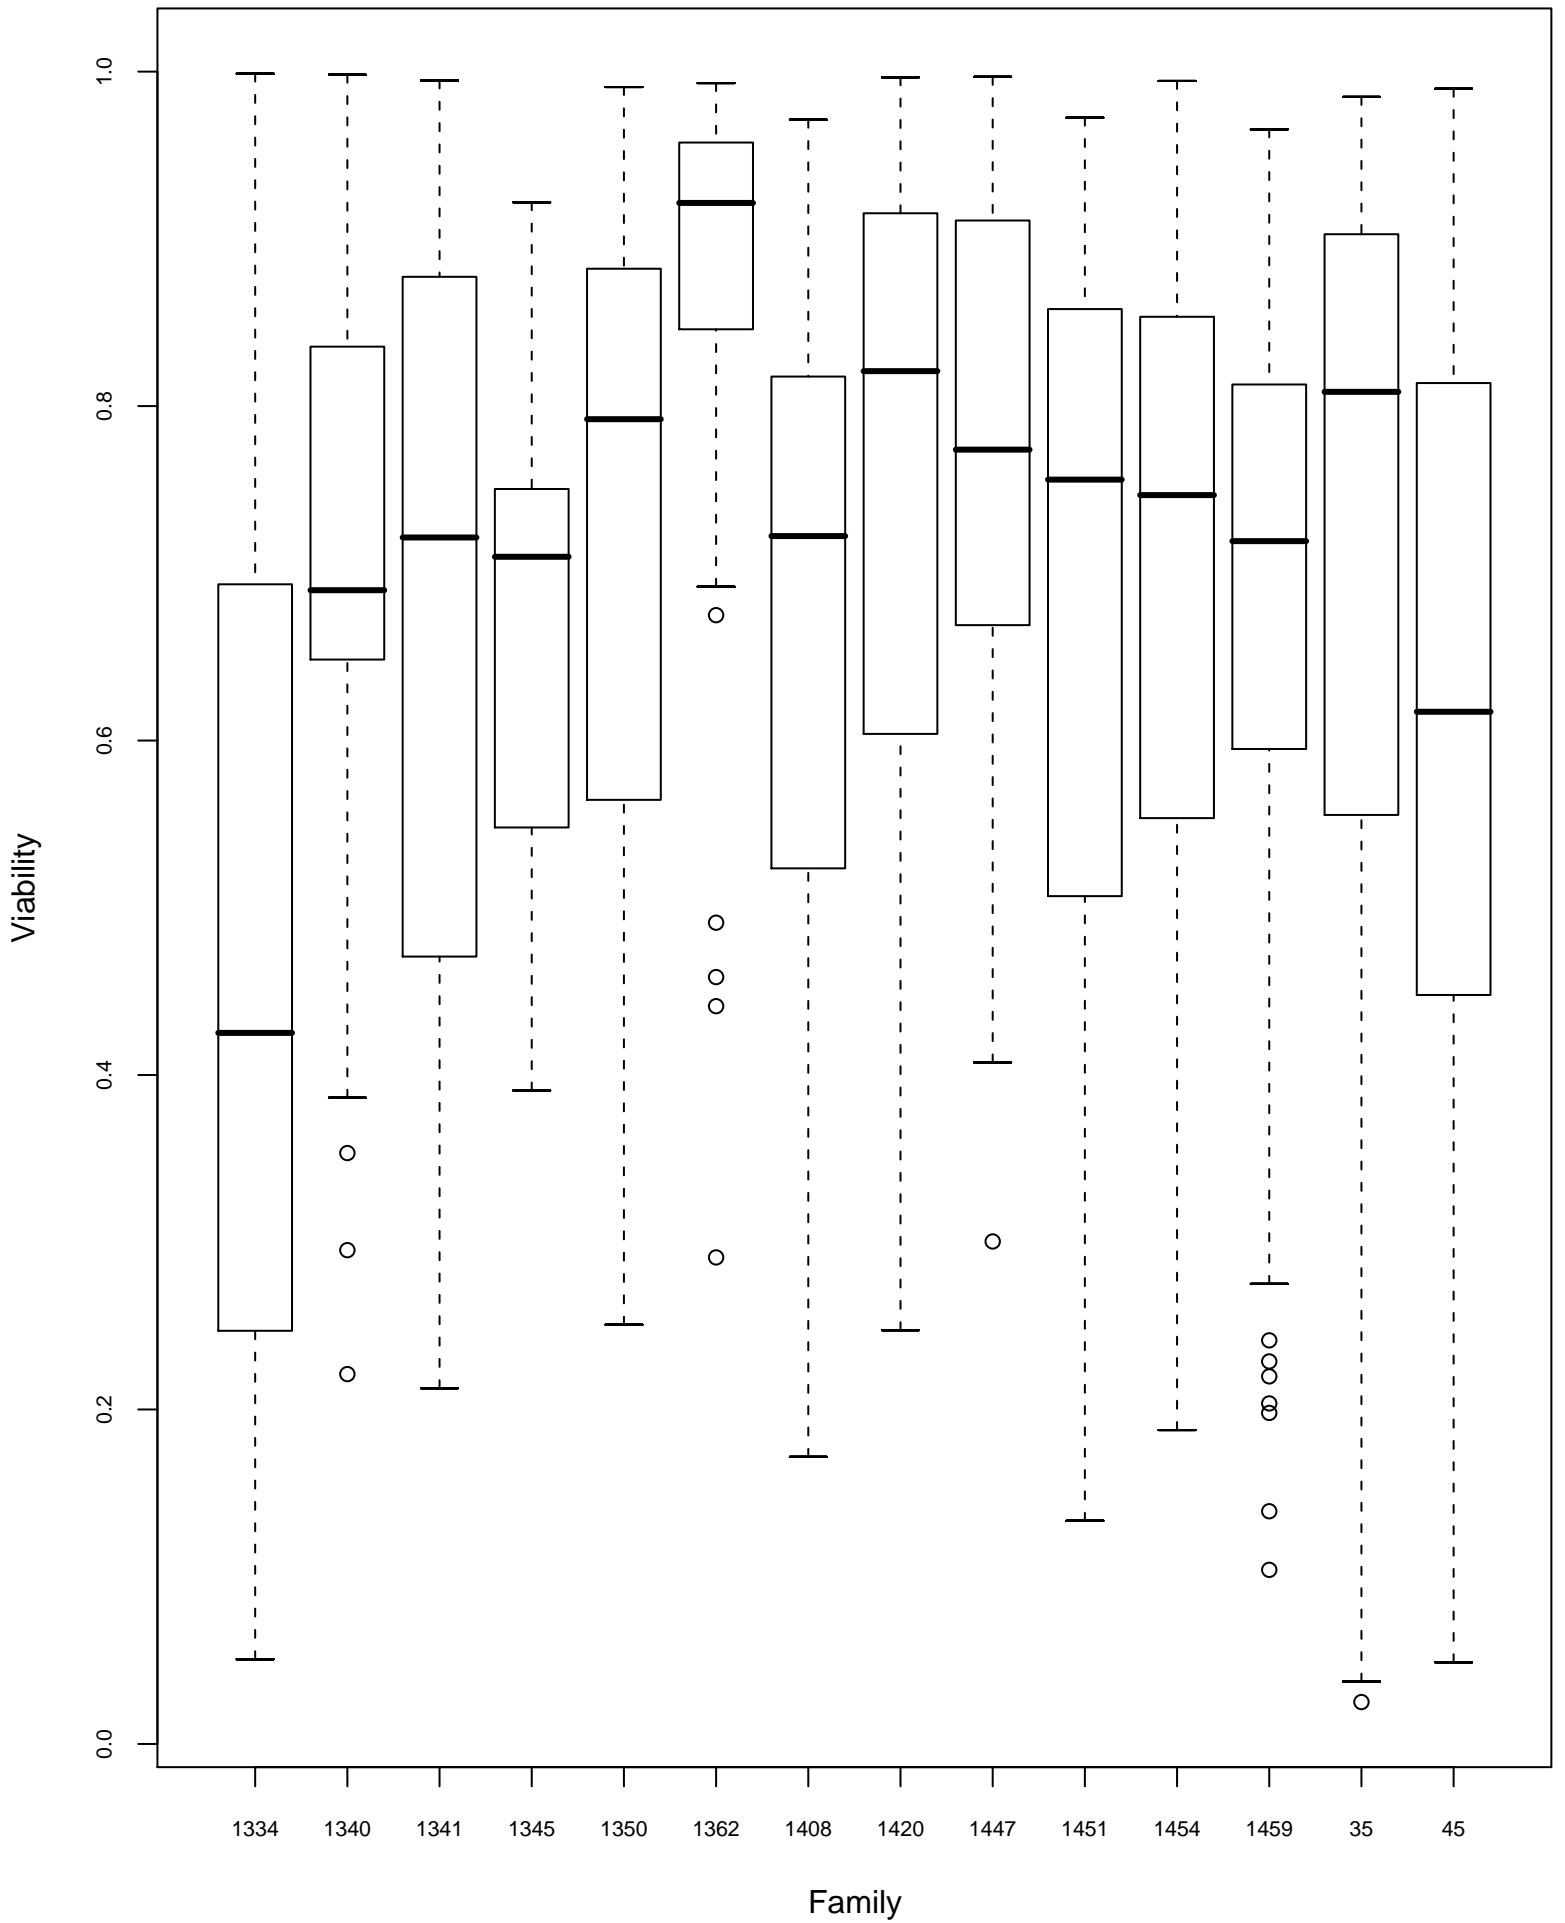

# Drug Clad, dose 0.0016 (mM)

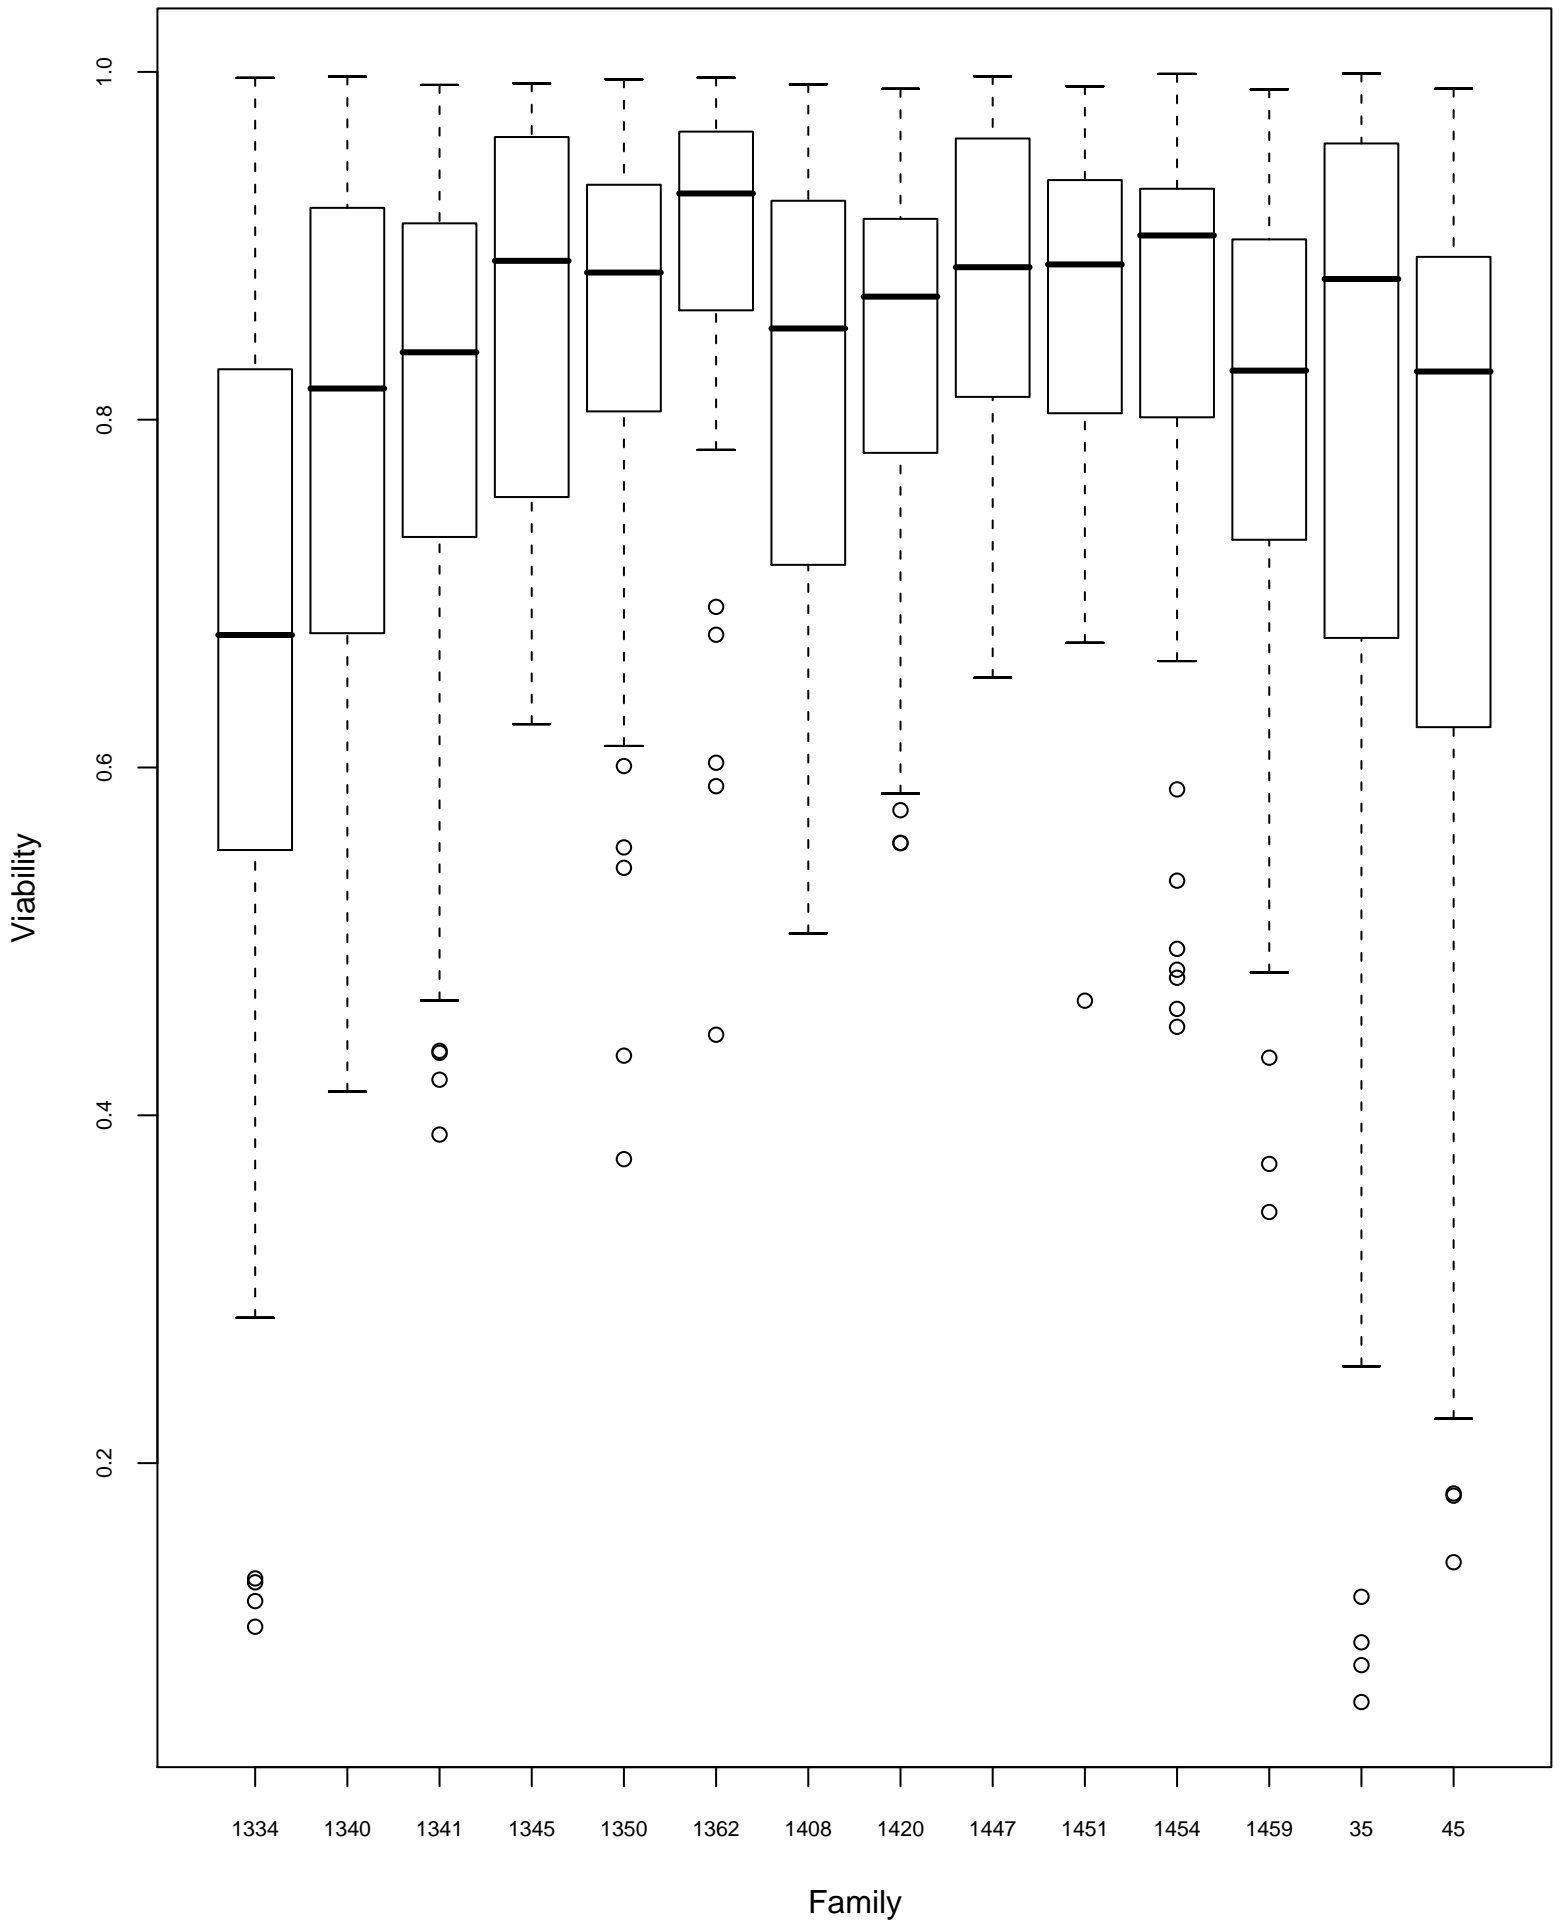

# Drug Clad, dose 0.00064 (mM)

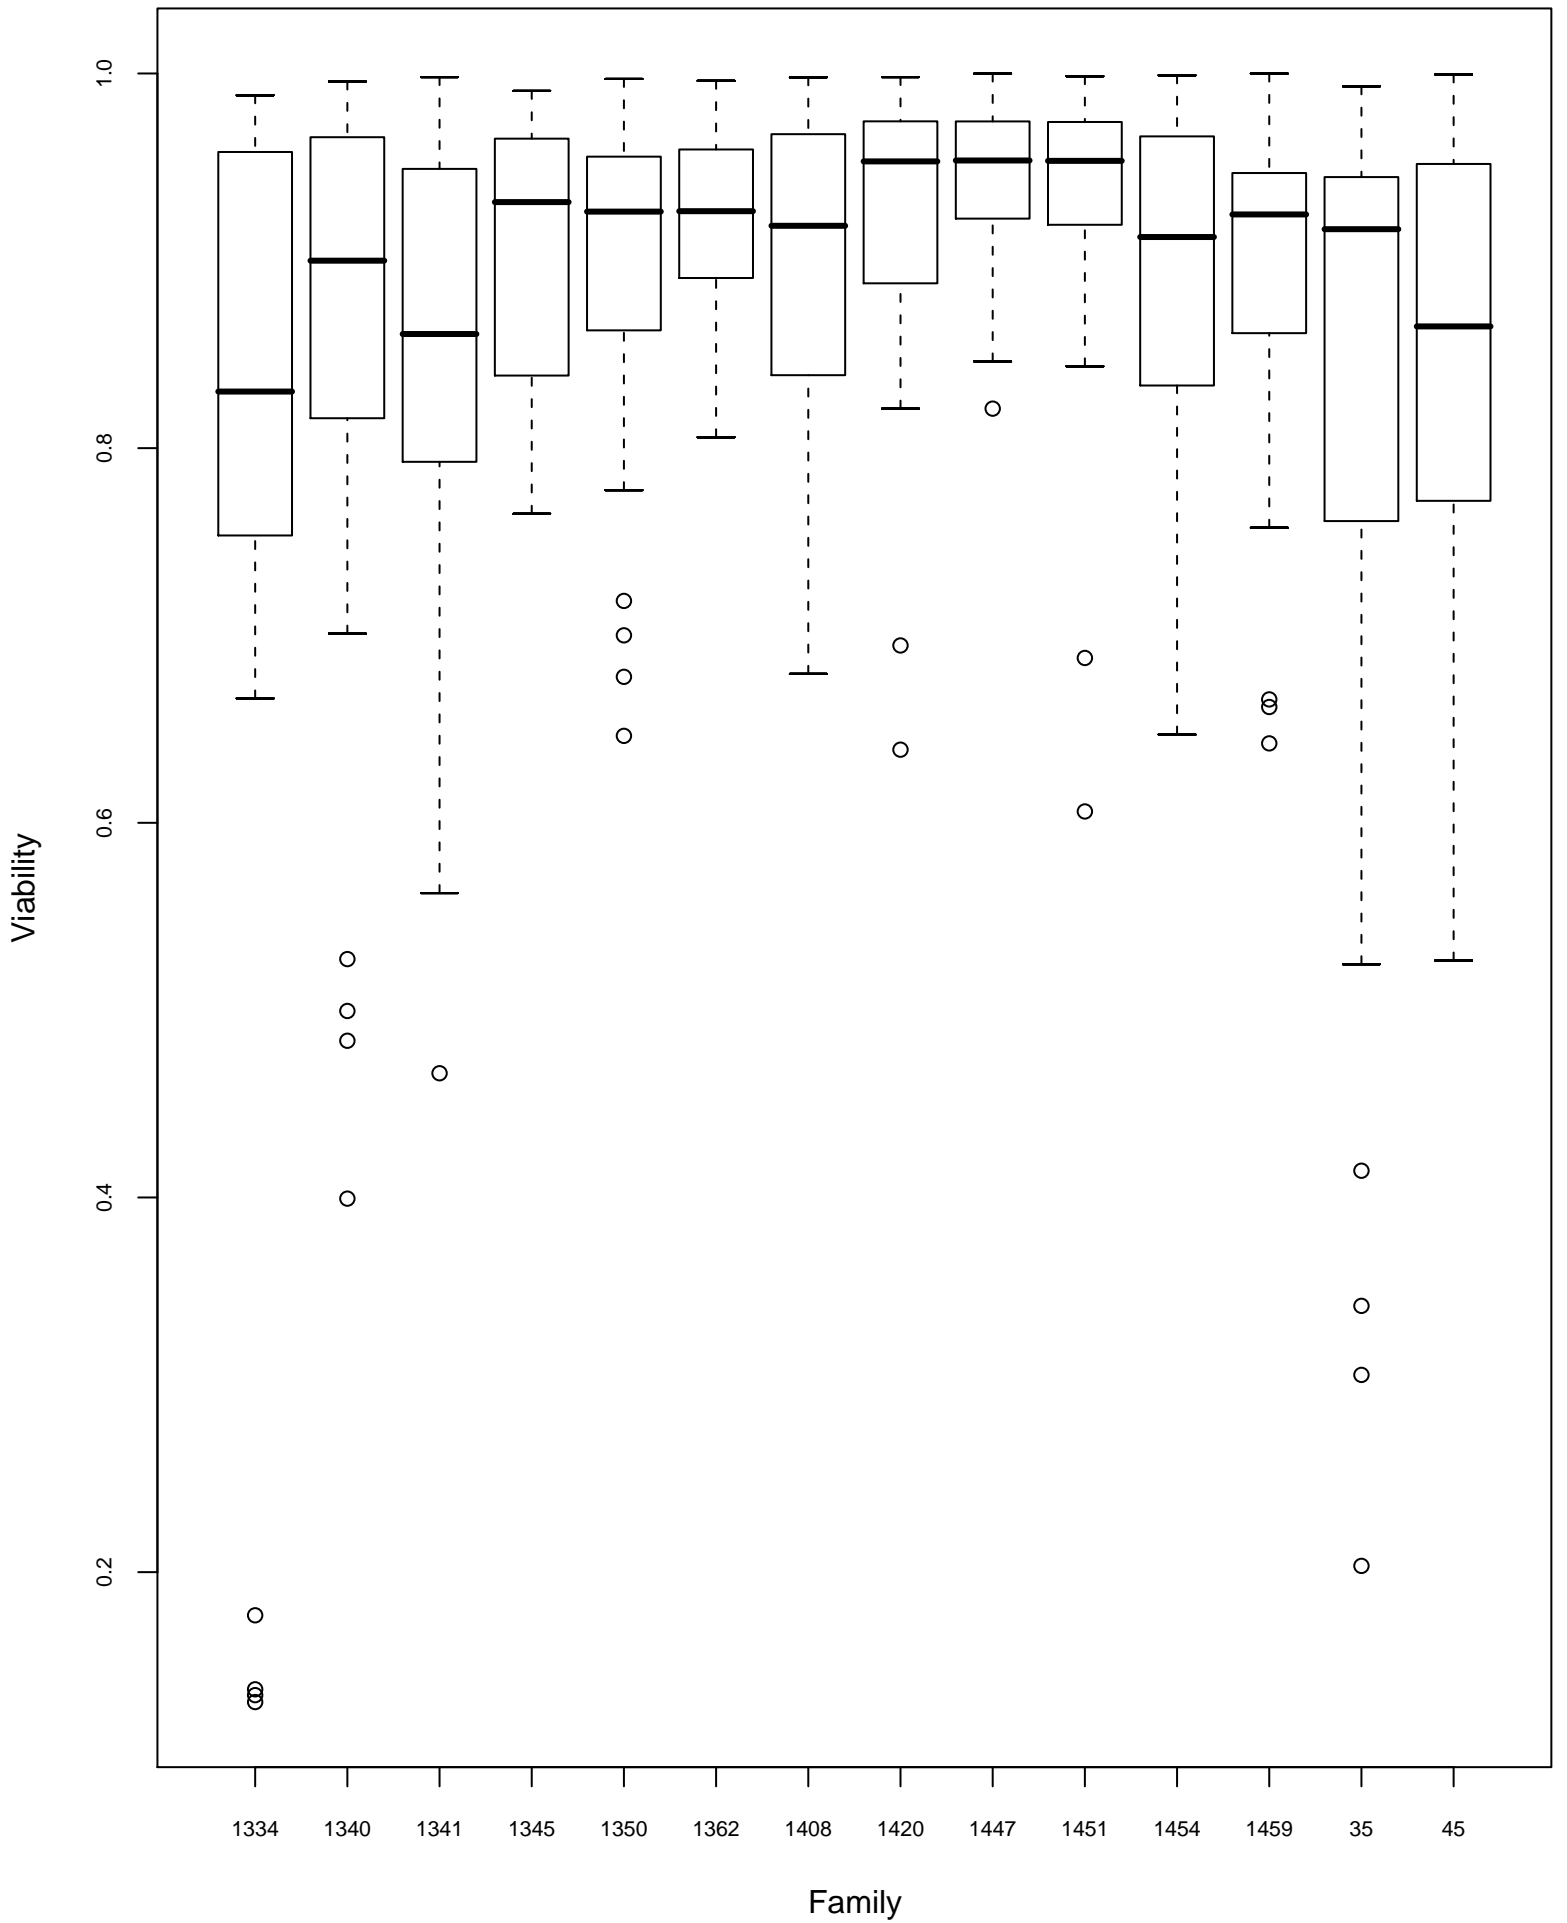

# Drug Cytar, dose 0.005 (mM)

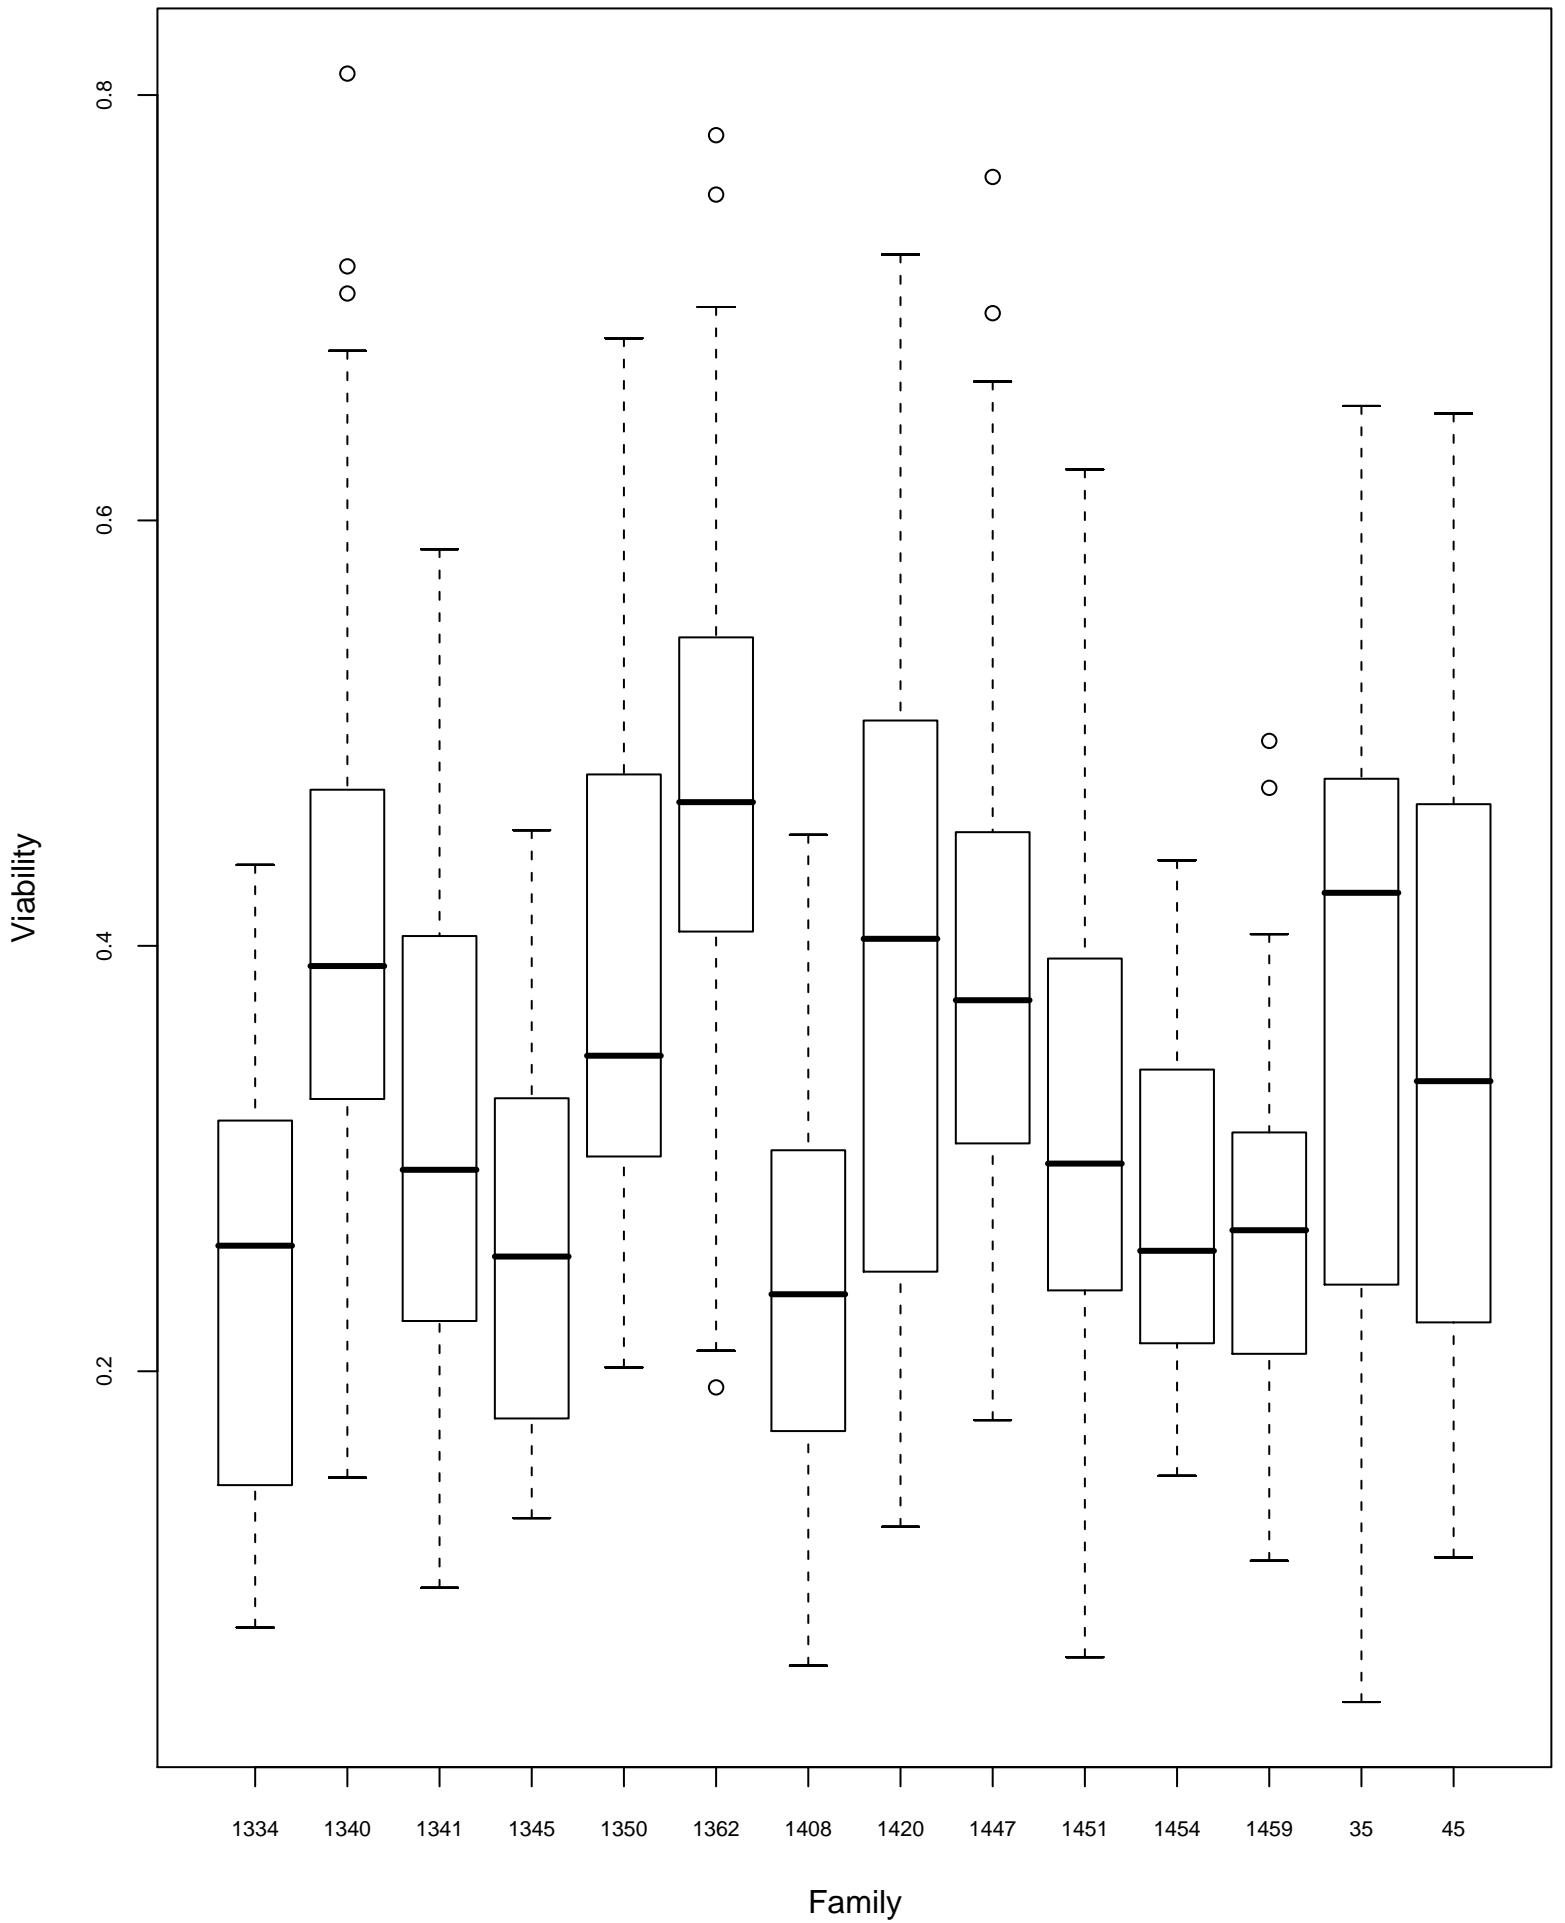

# Drug Cytar, dose 0.0014286 (mM)

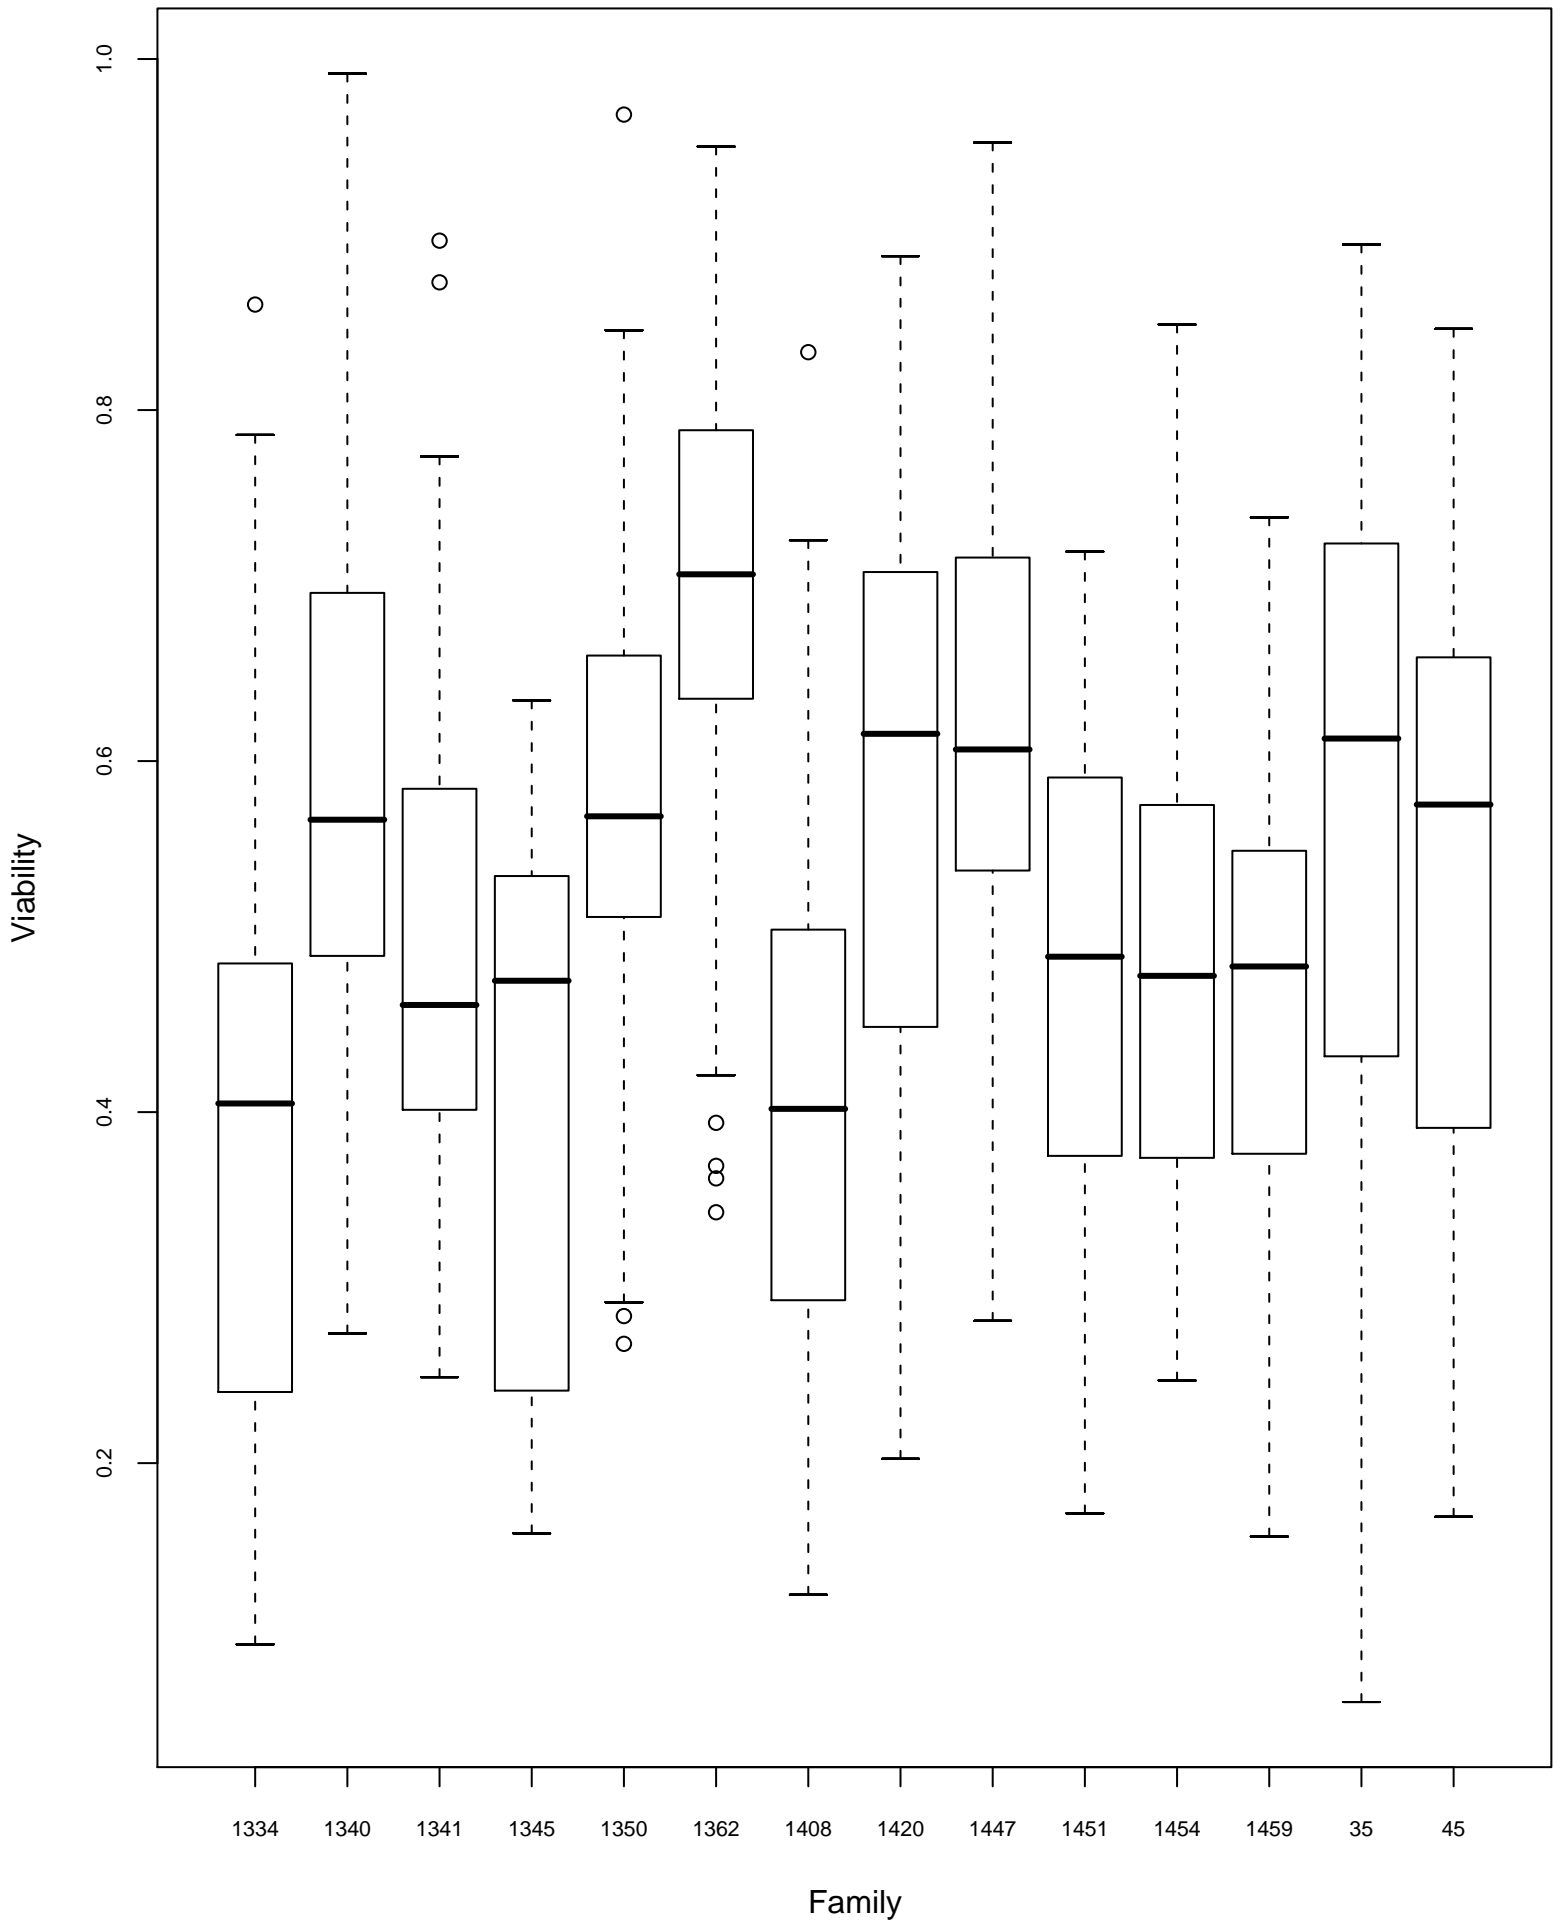

# Drug Cytar, dose 0.0004082 (mM)

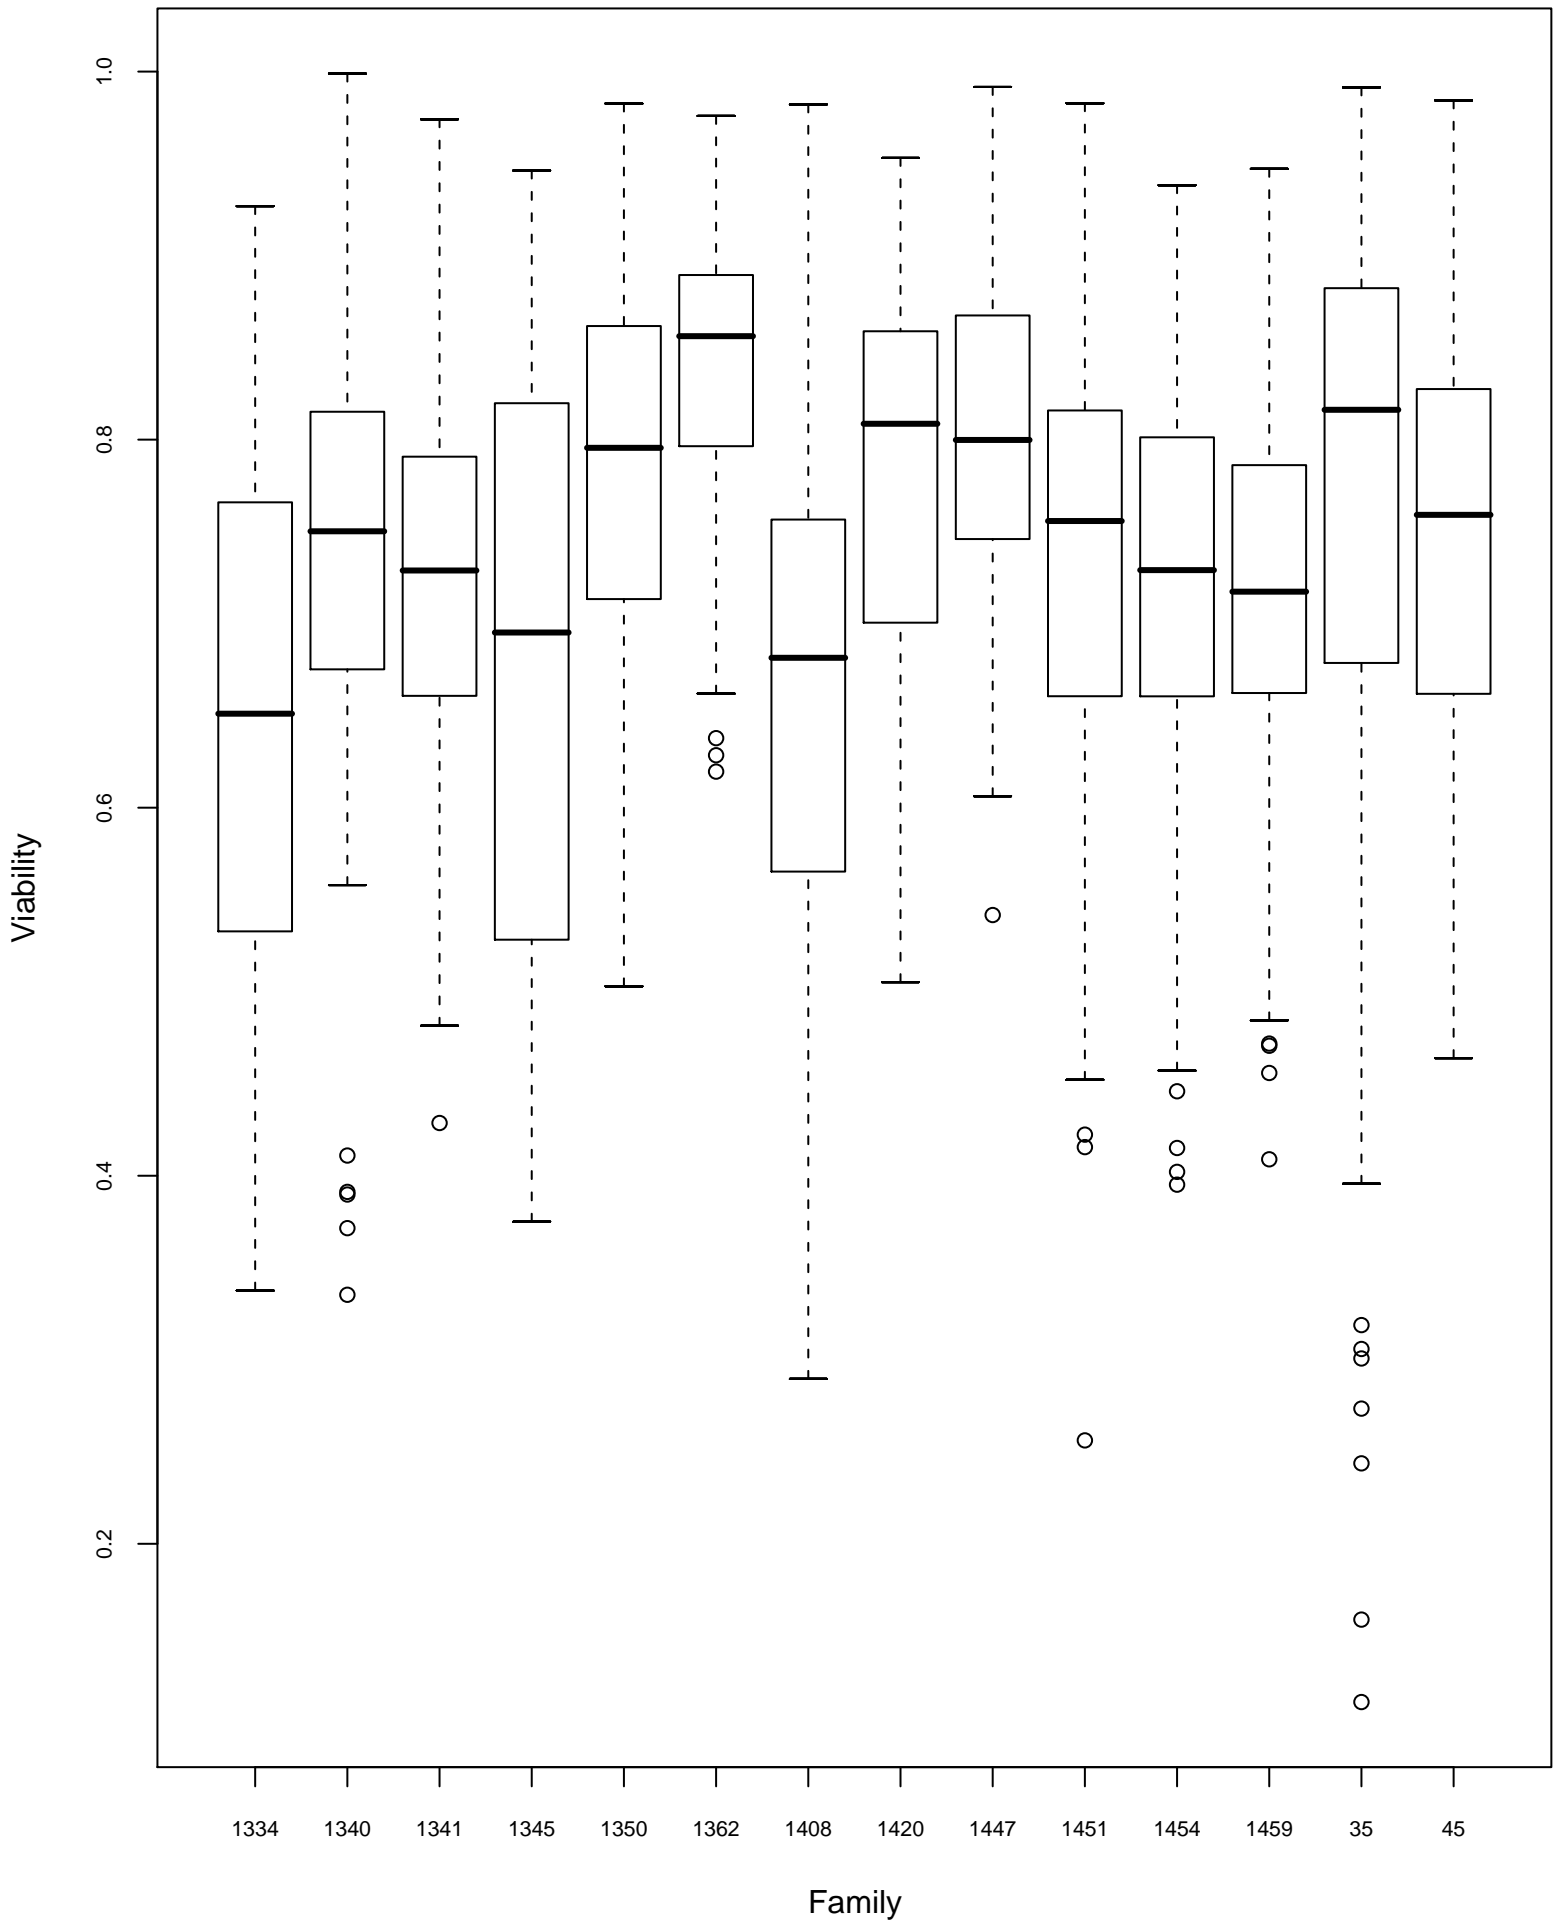

# Drug Cytar, dose 0.000166 (mM)

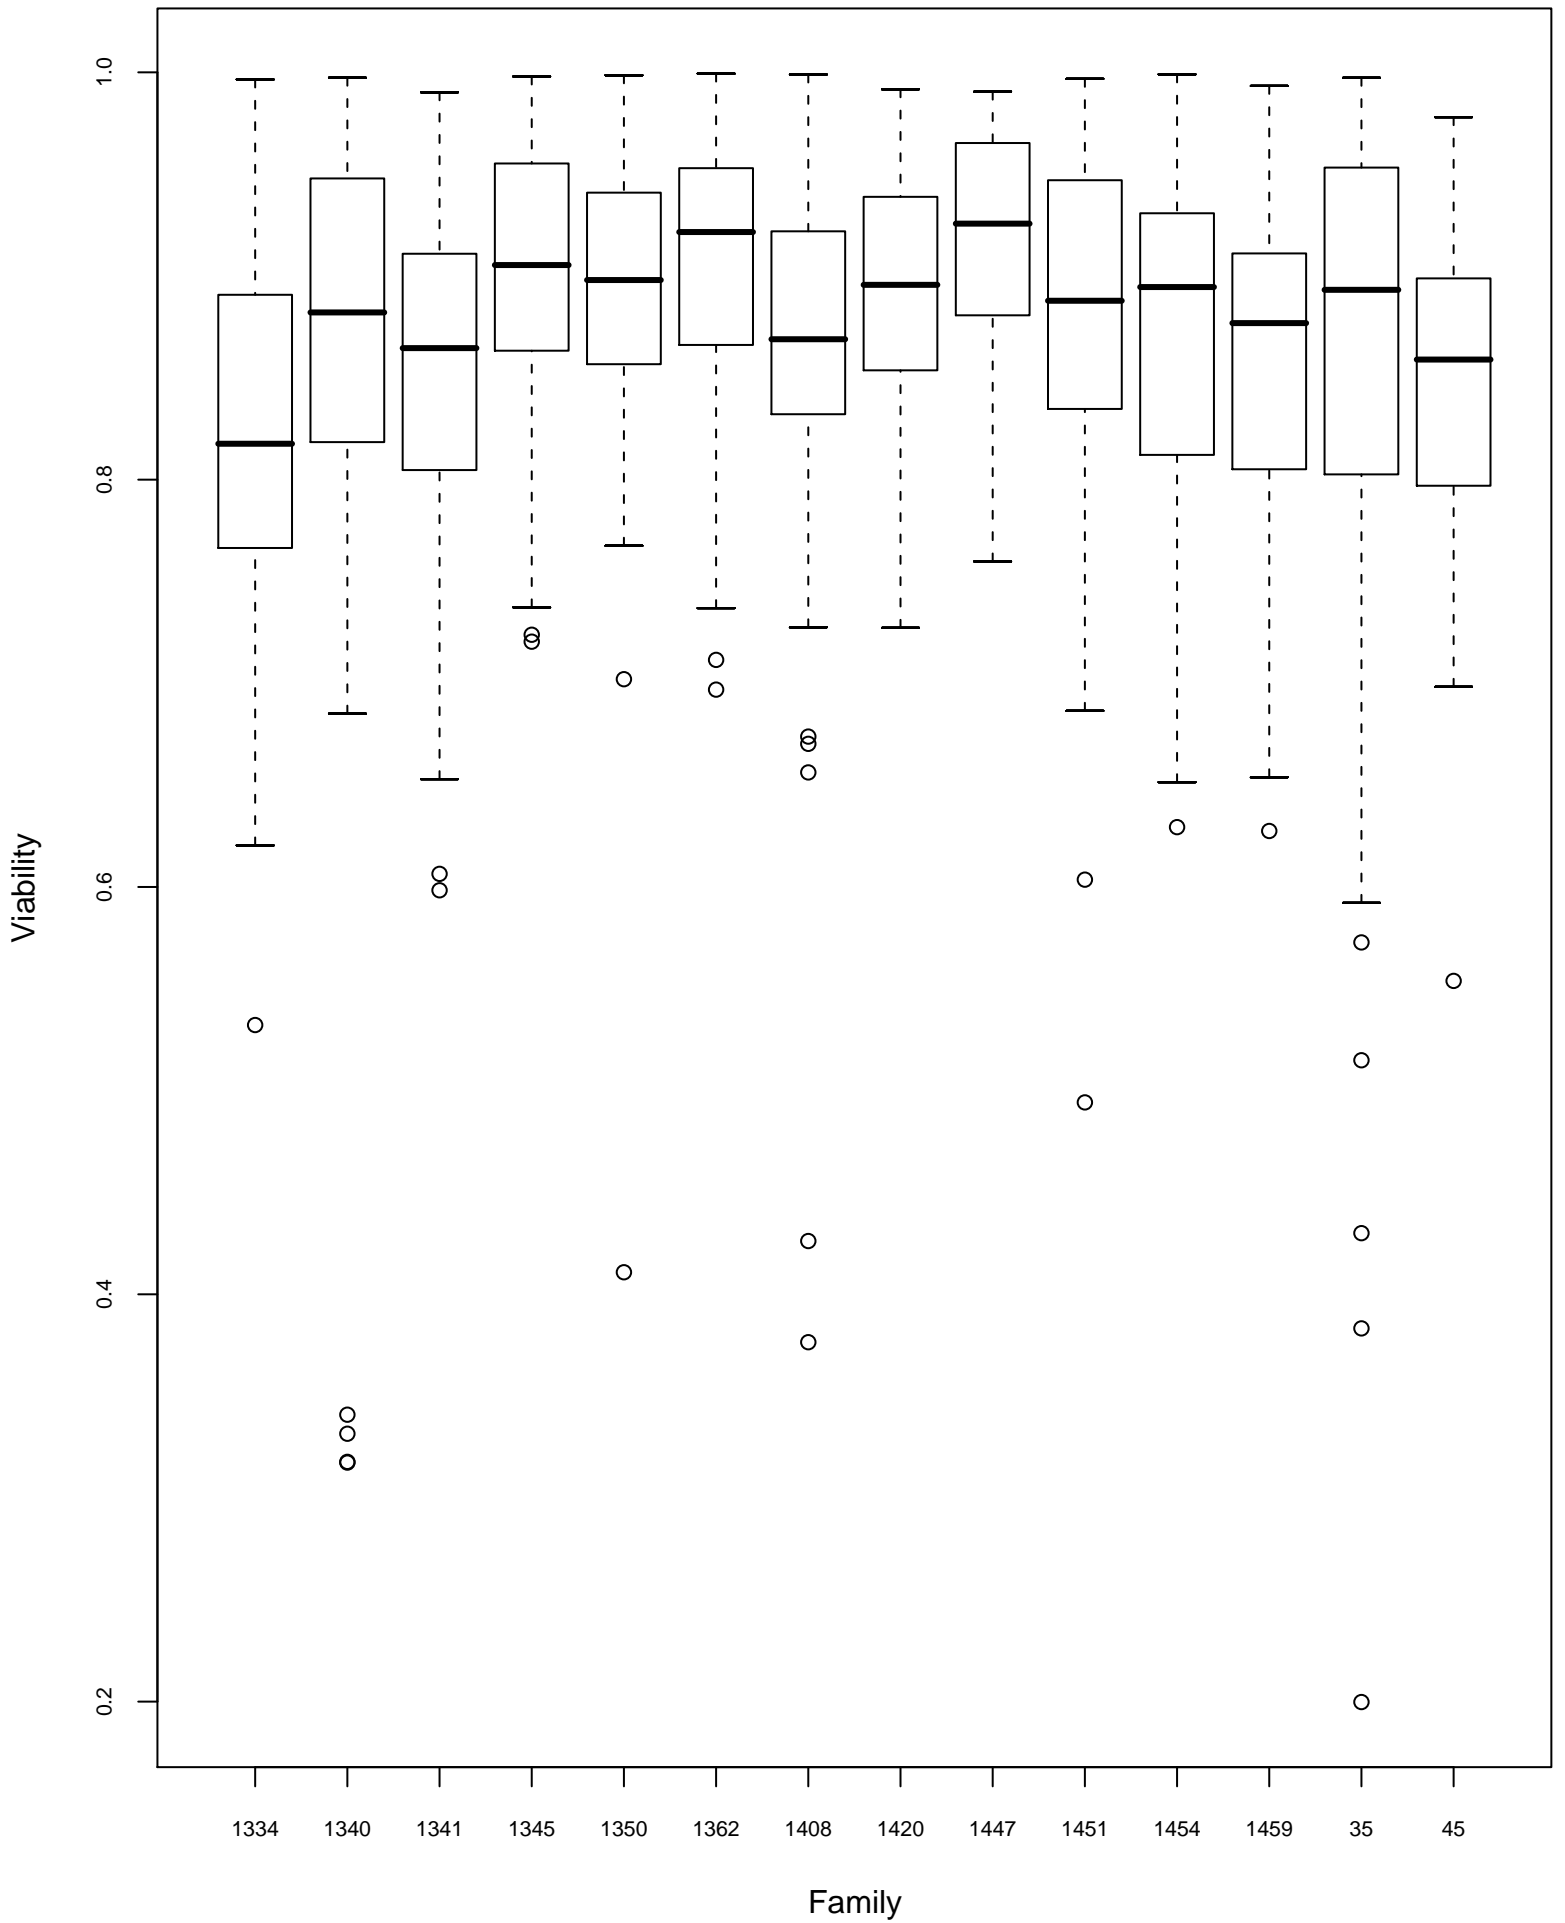



# Drug Daun, dose 0.0001 (mM)

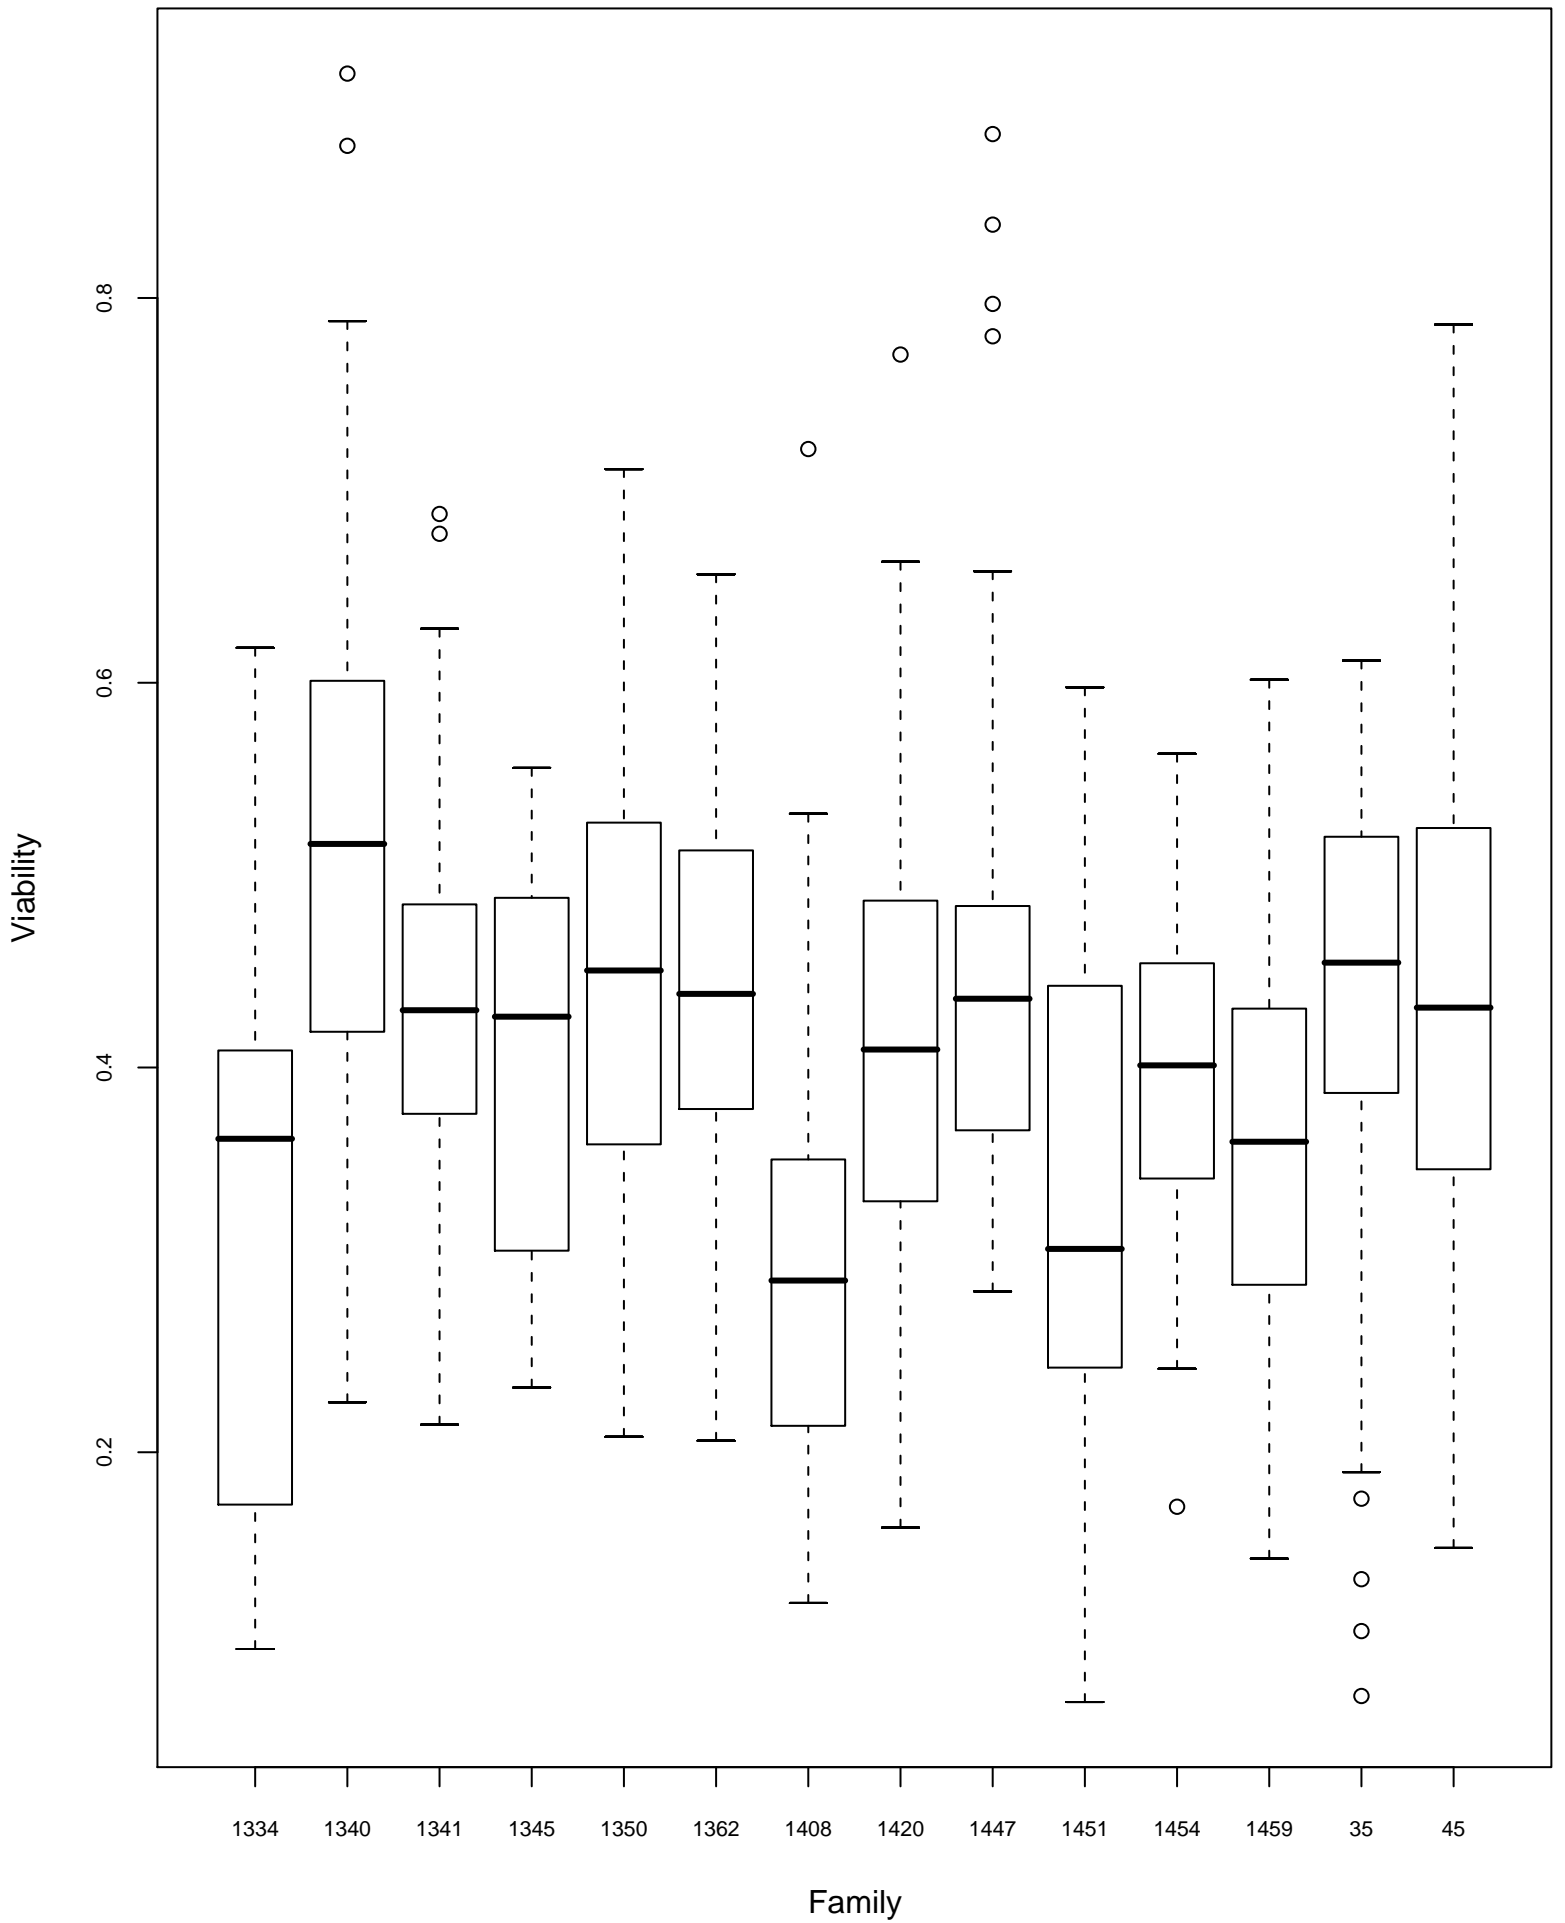

# Drug Daun, dose 5e-05 (mM)

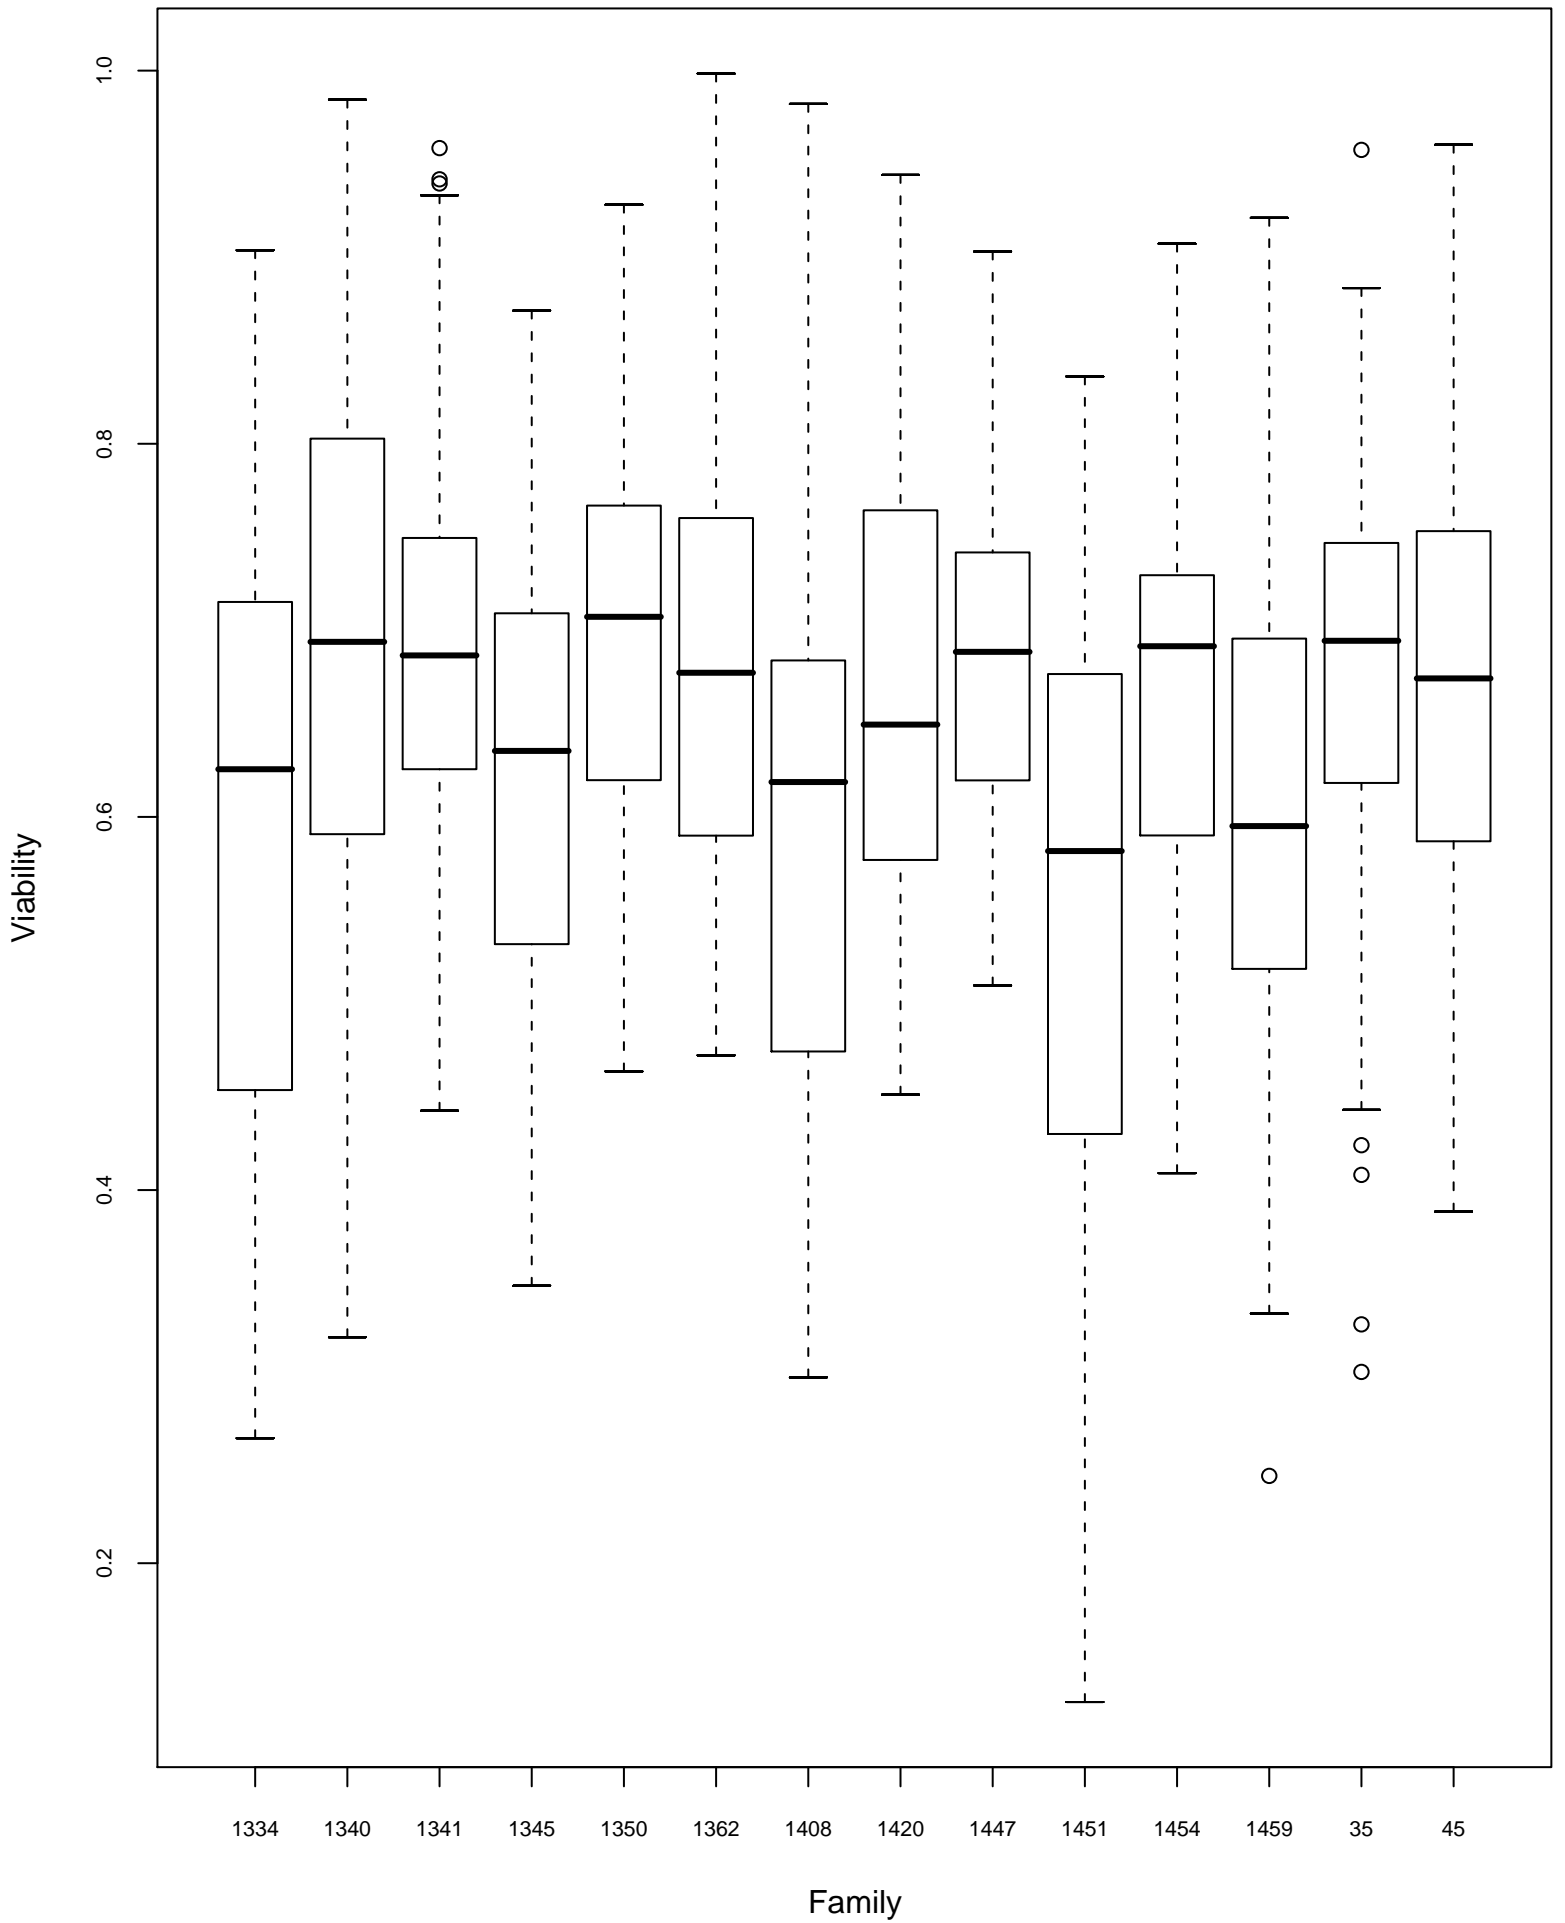

# Drug Daun, dose 2.5e-05 (mM)

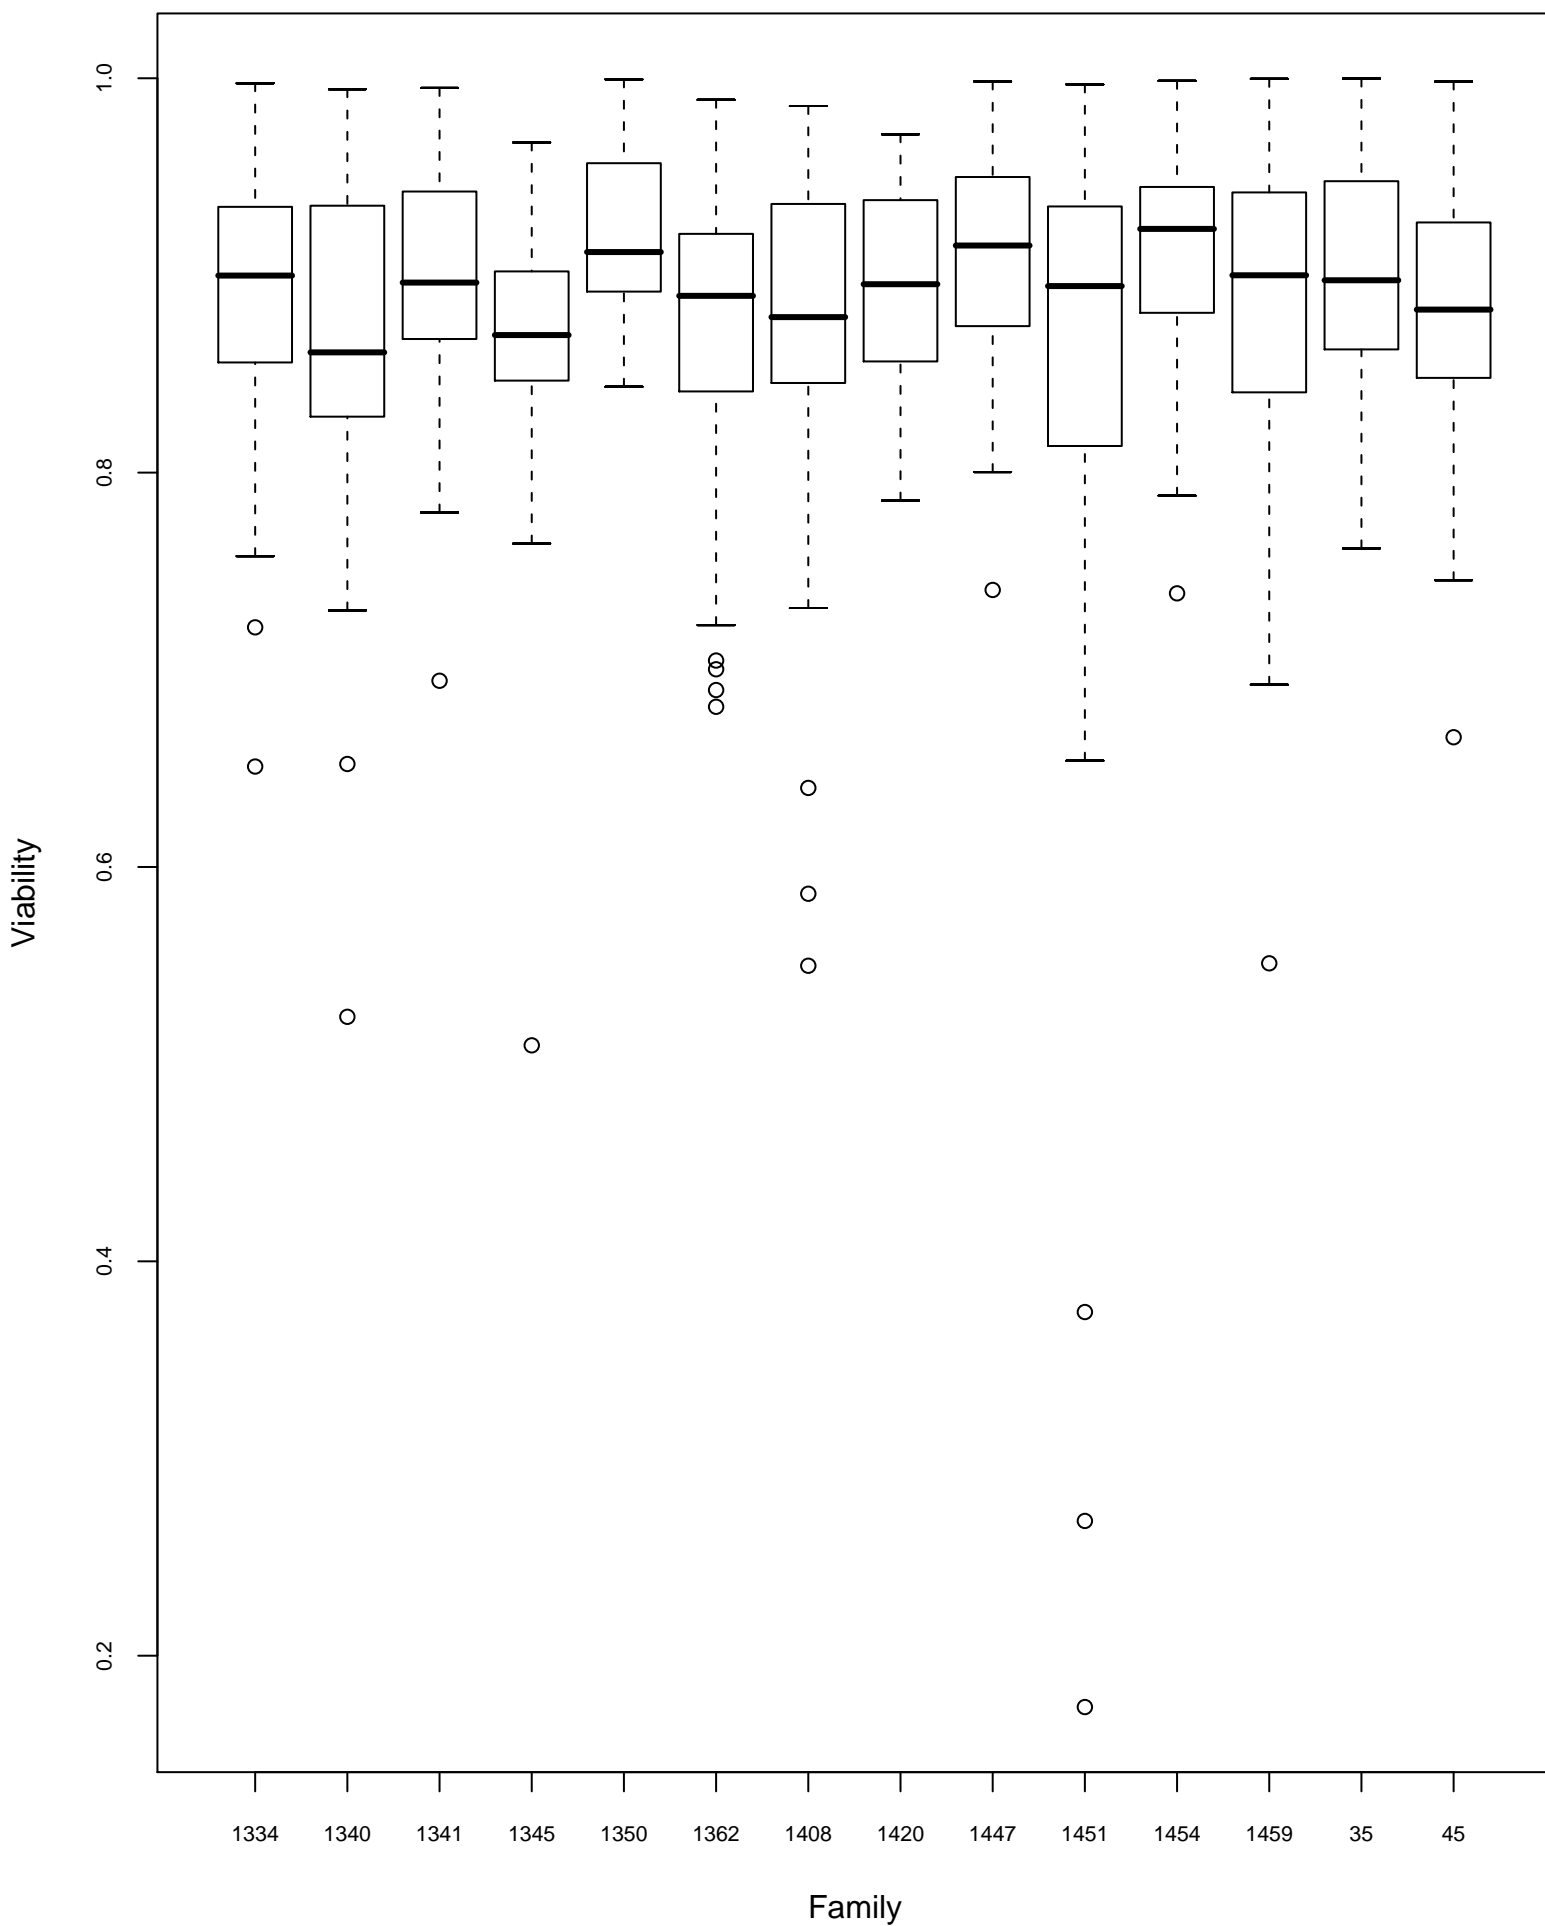

# Drug Daun, dose 1.25e-05 (mM)

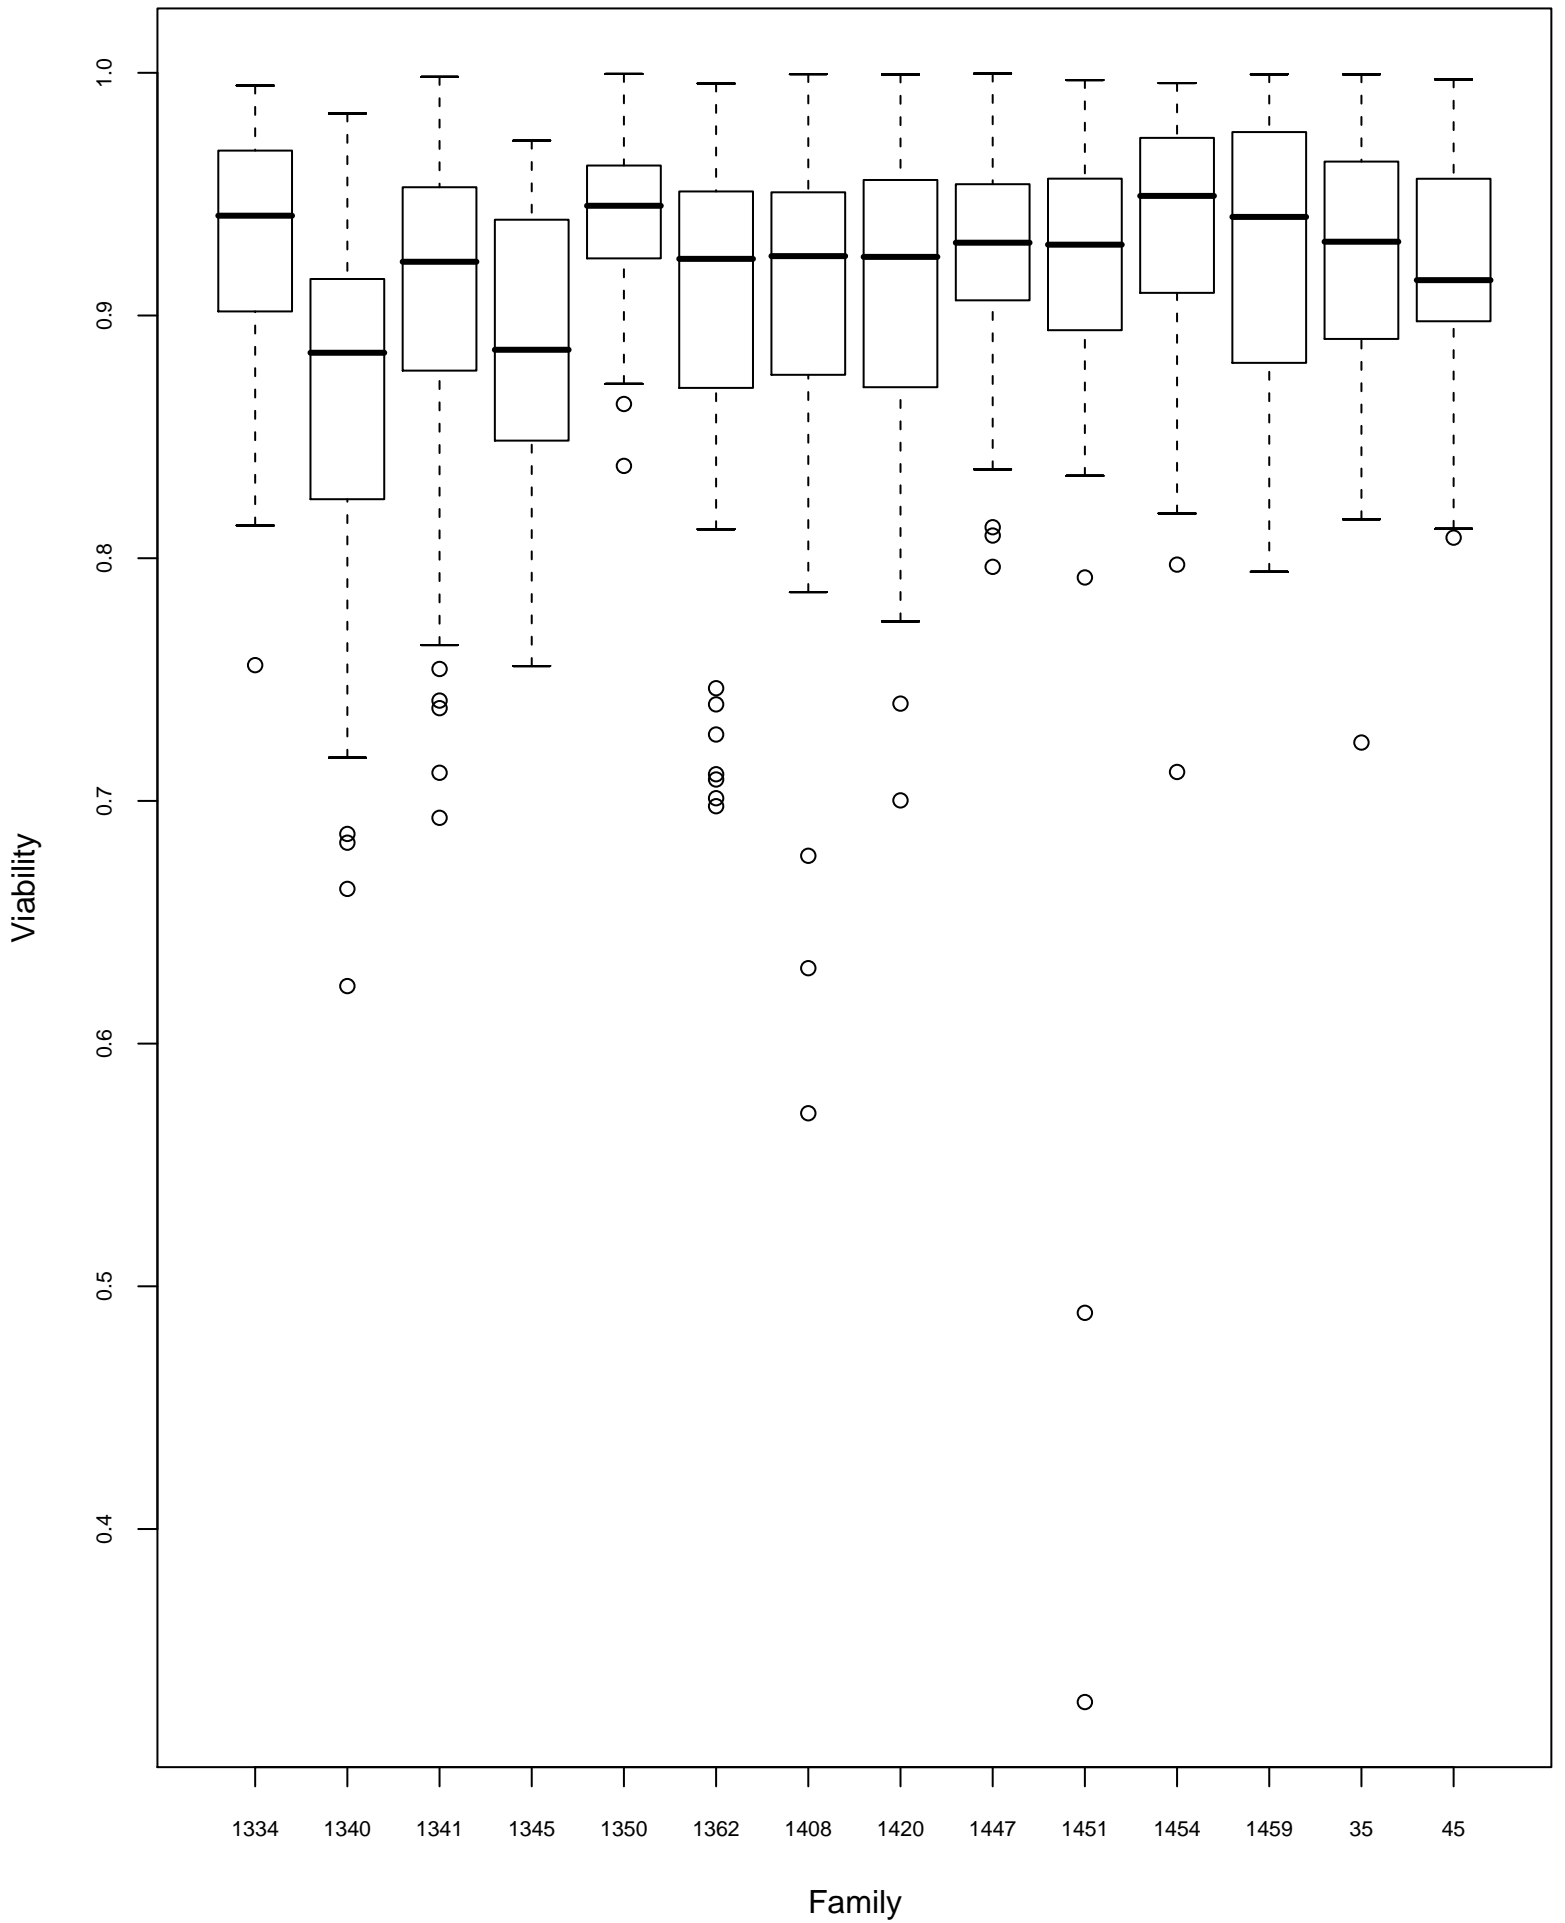

# Drug Doc, dose 0.0002 (mM)

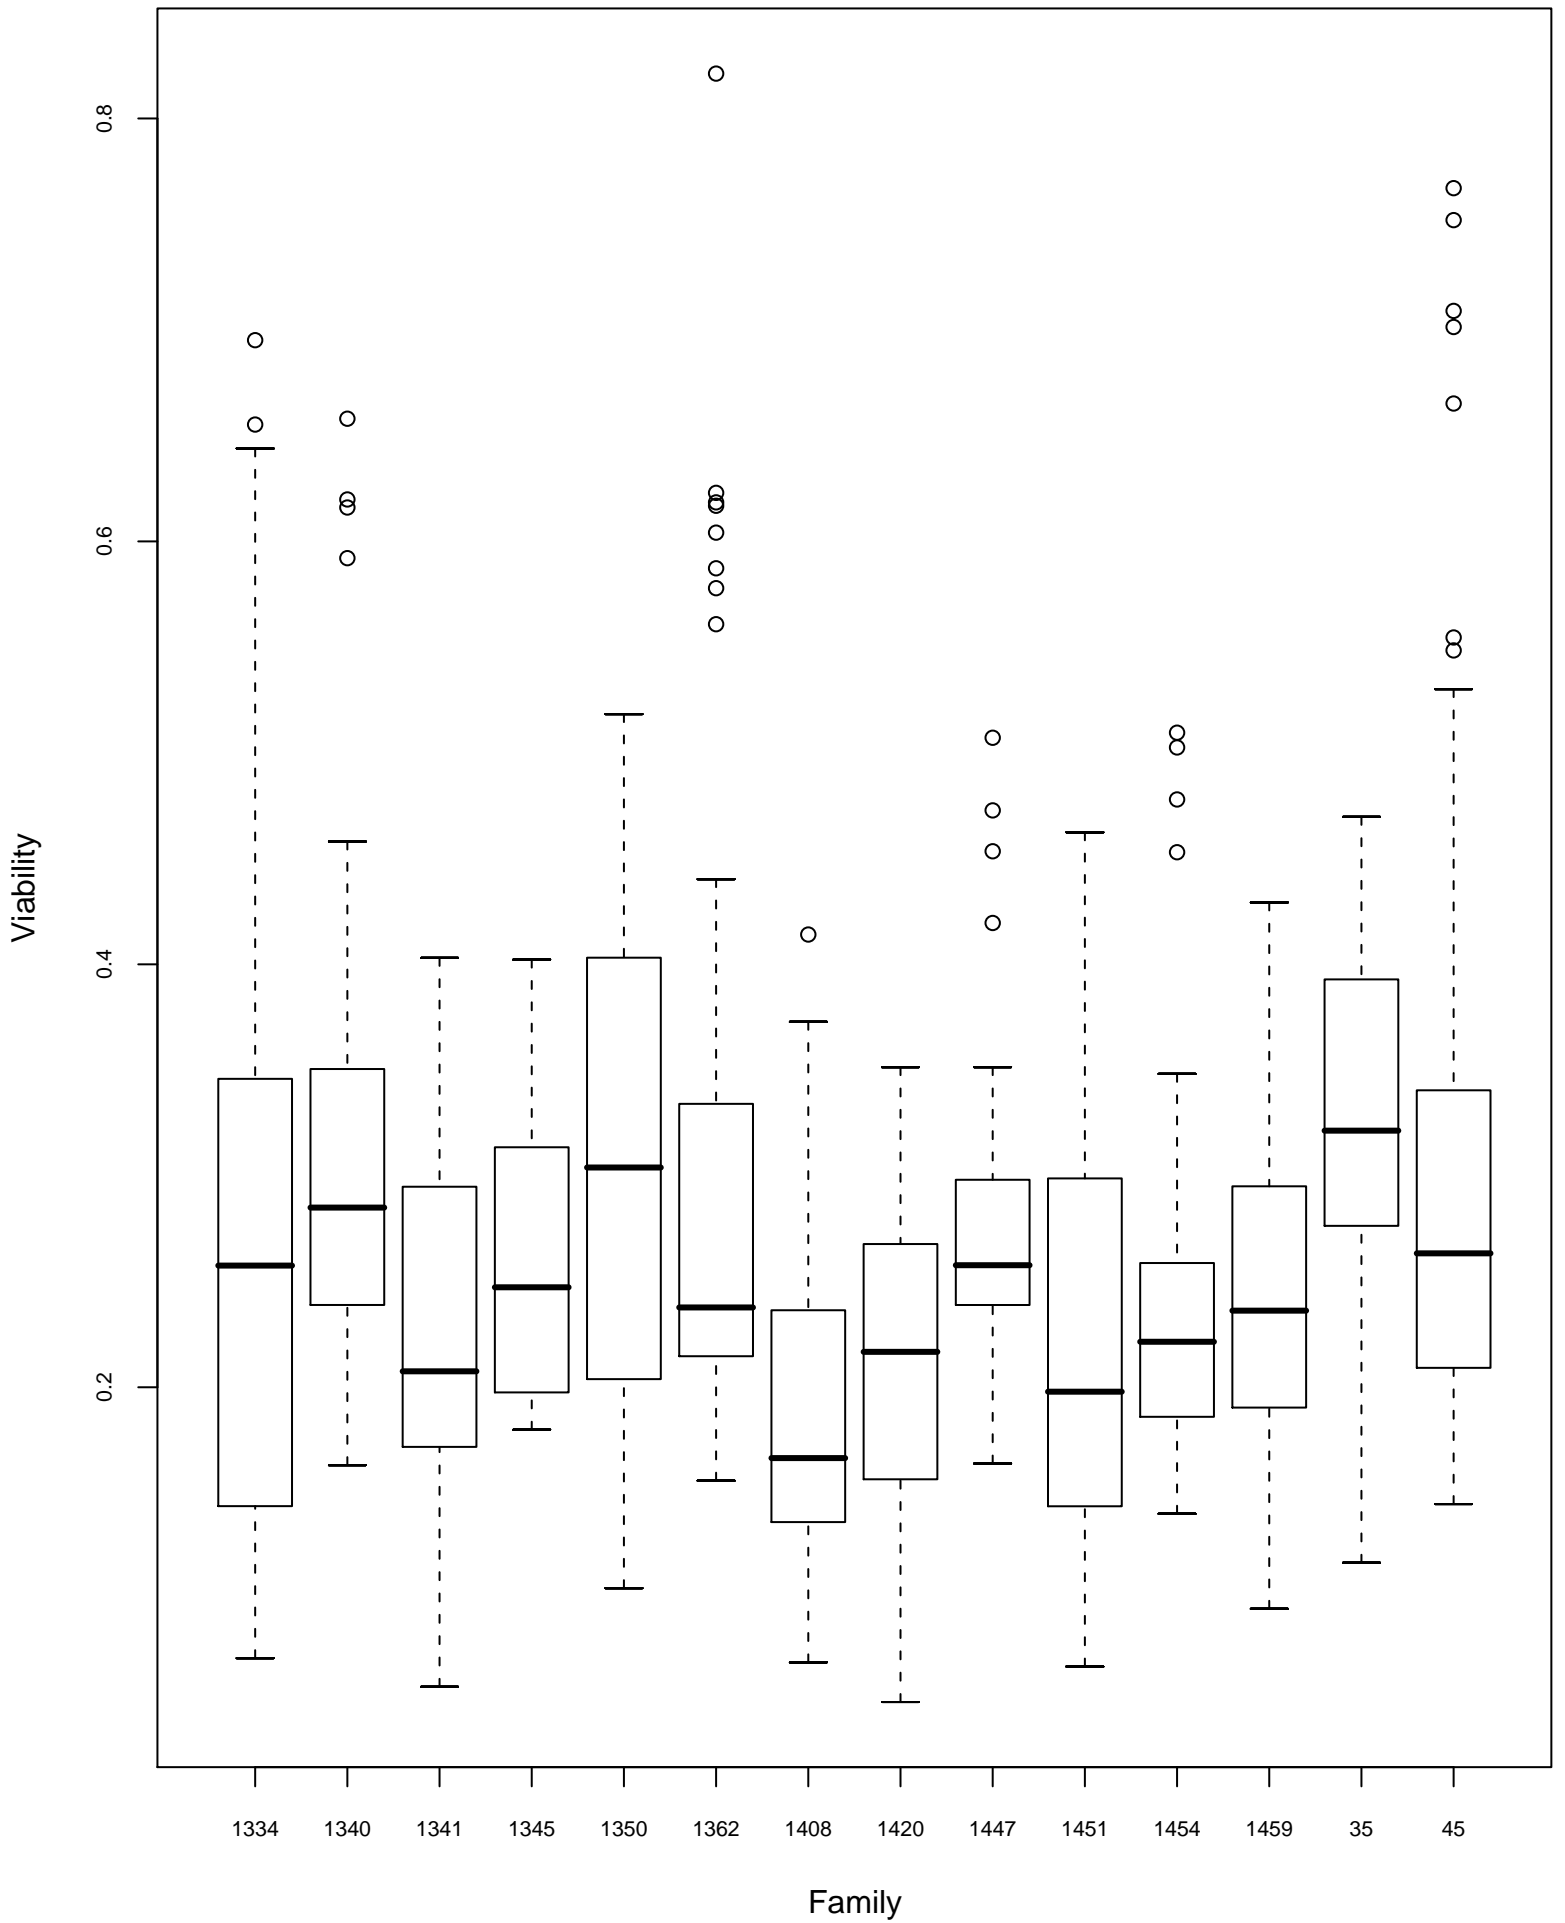

# Drug Doc, dose 8e-05 (mM)

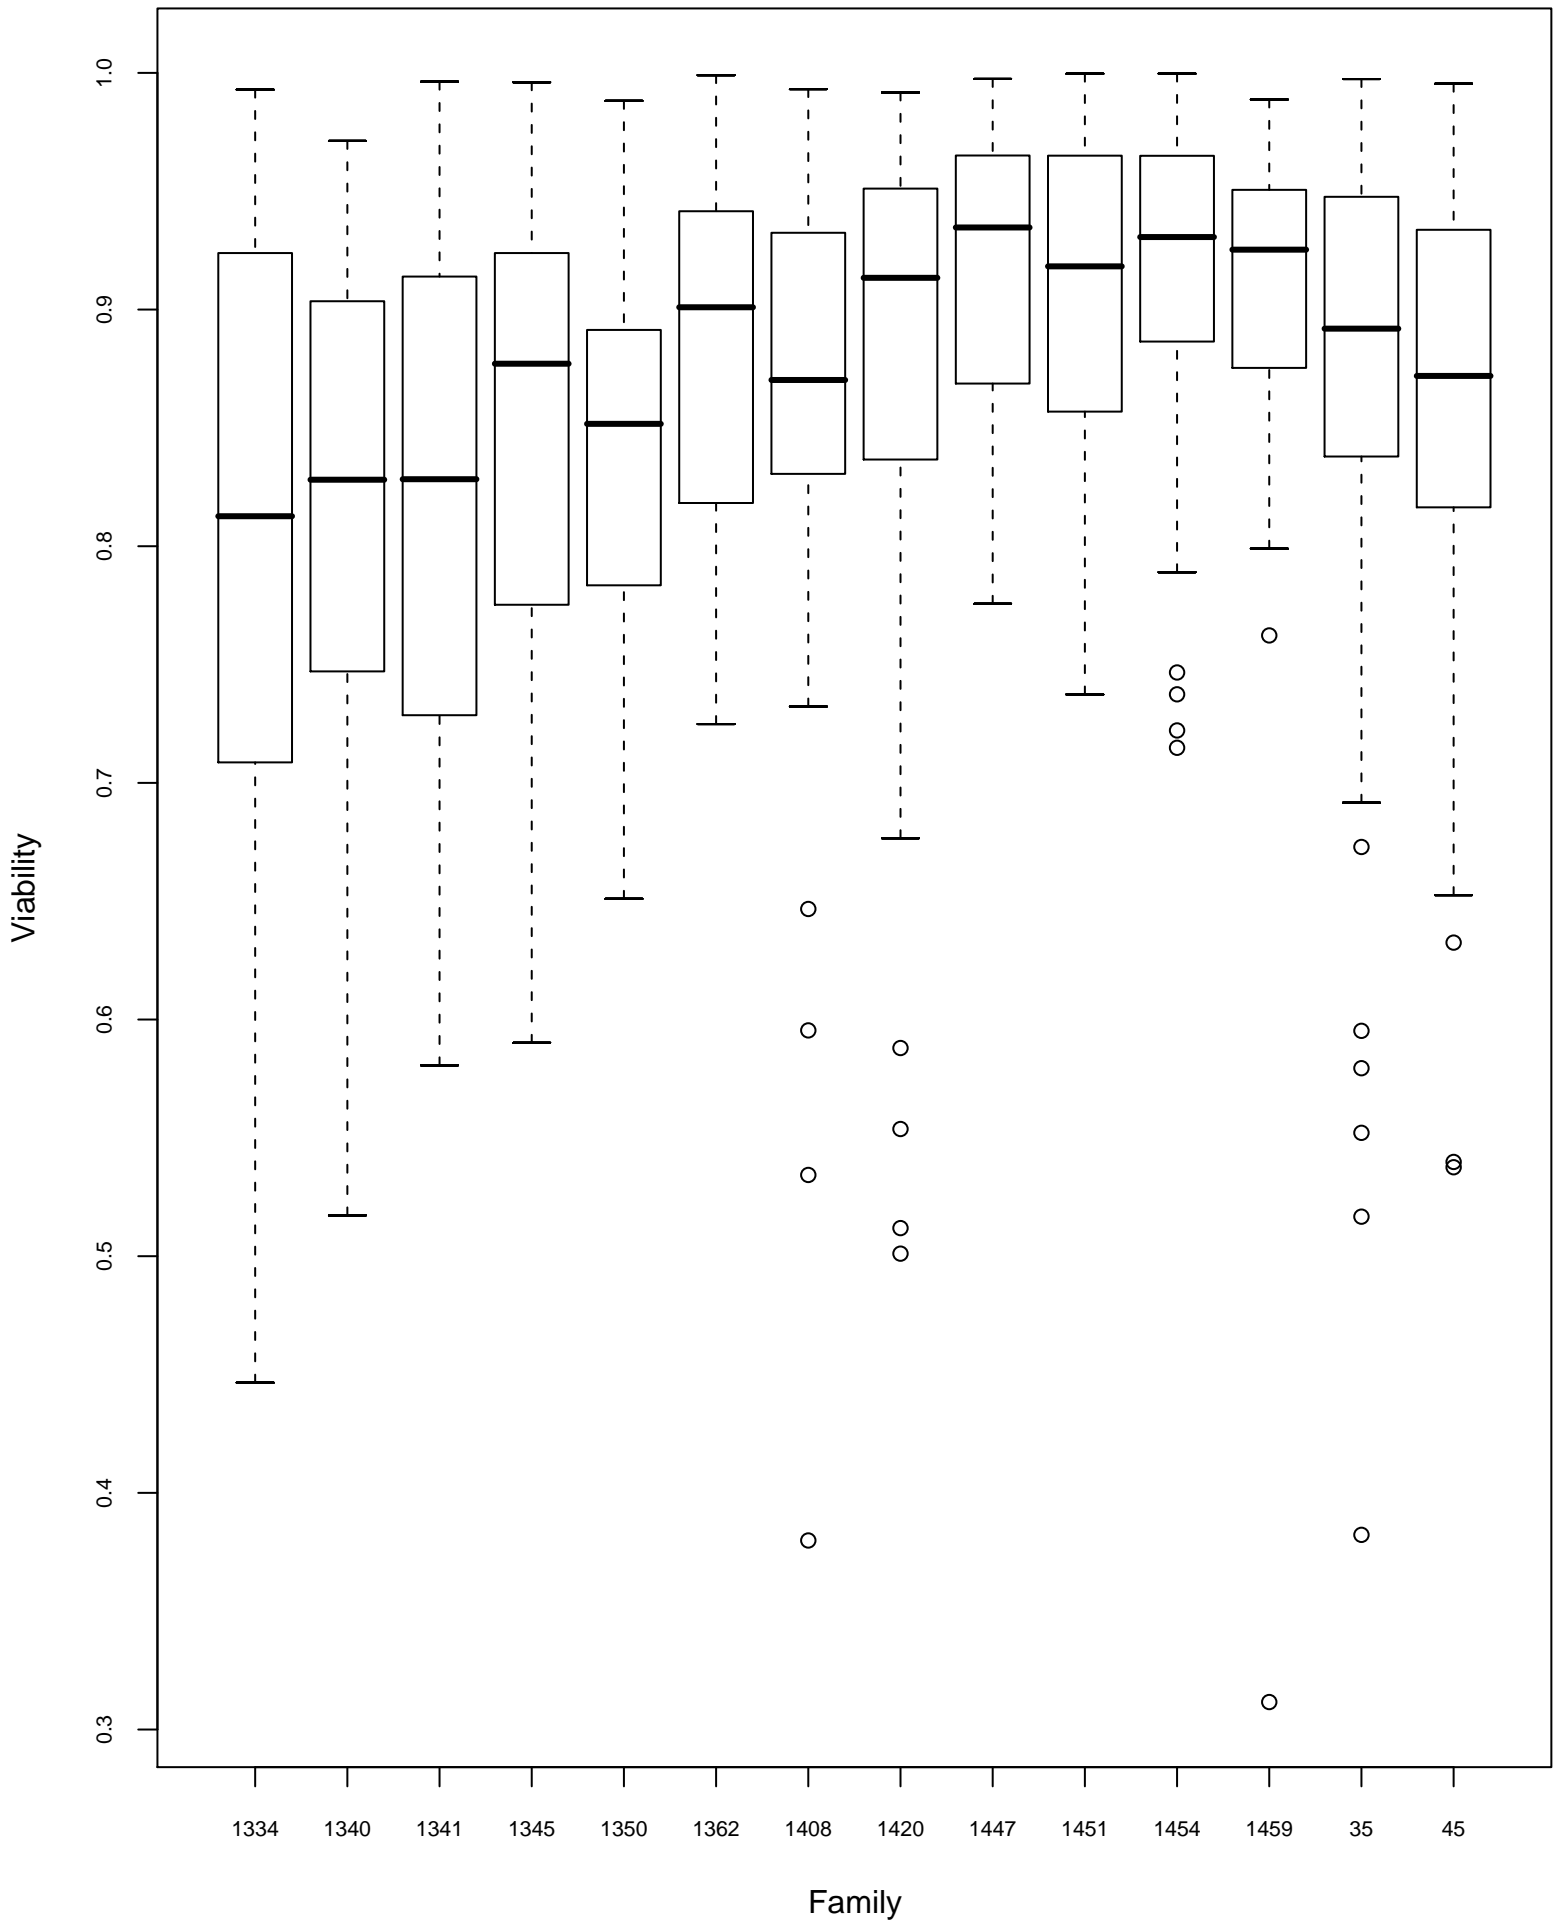

# Drug Doc, dose 3.2e-05 (mM)

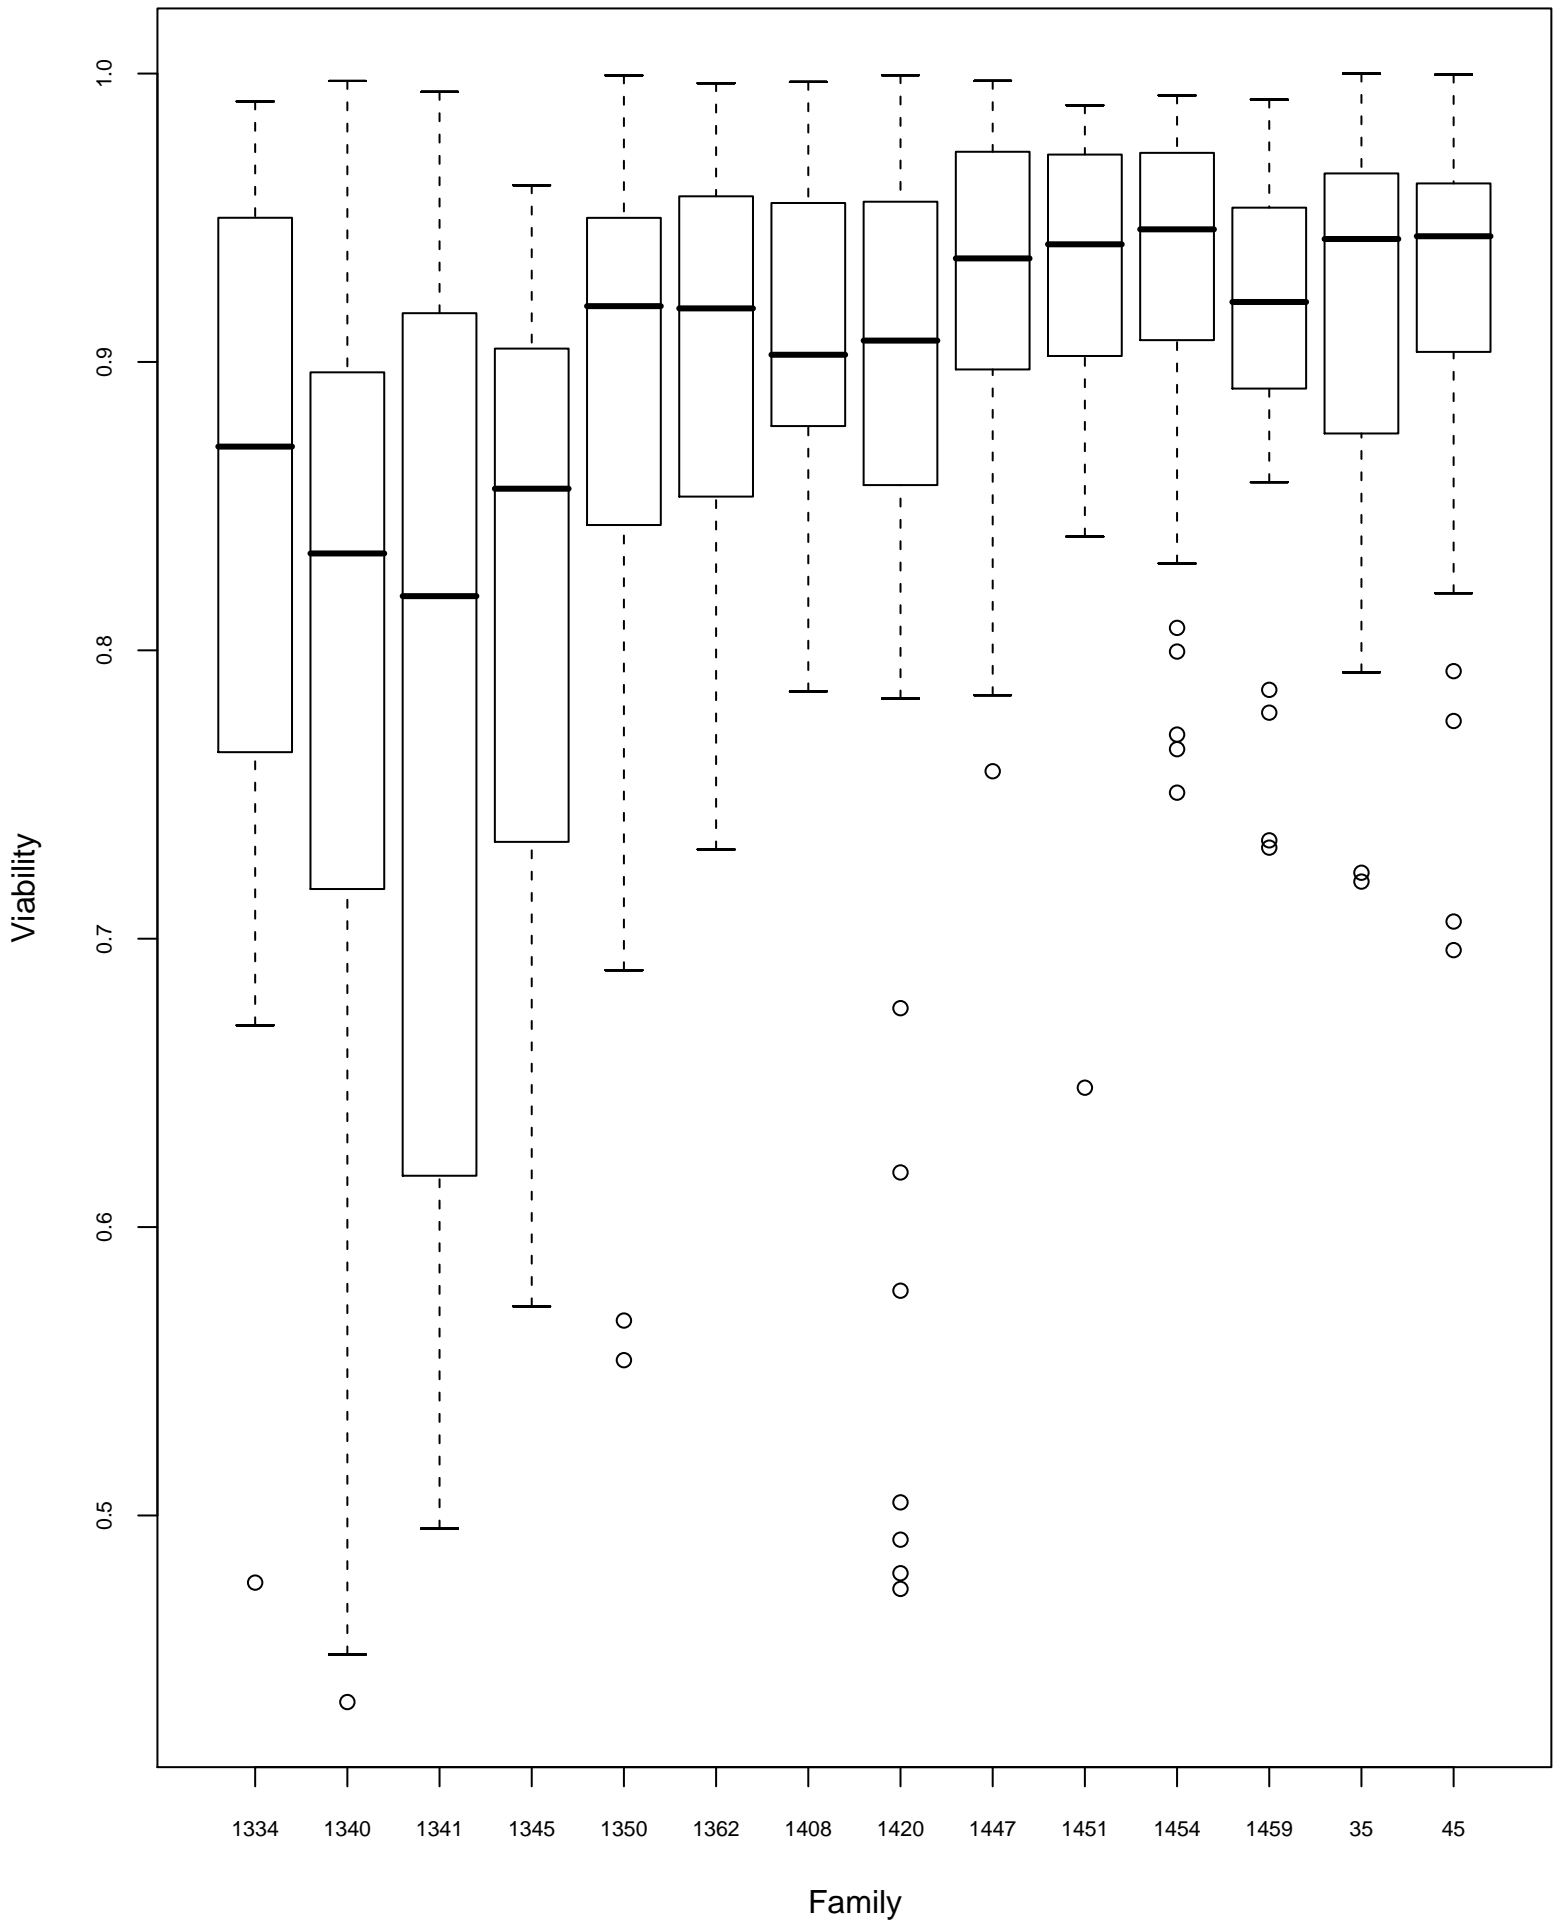

# Drug Doc, dose 1.28e-05 (mM)

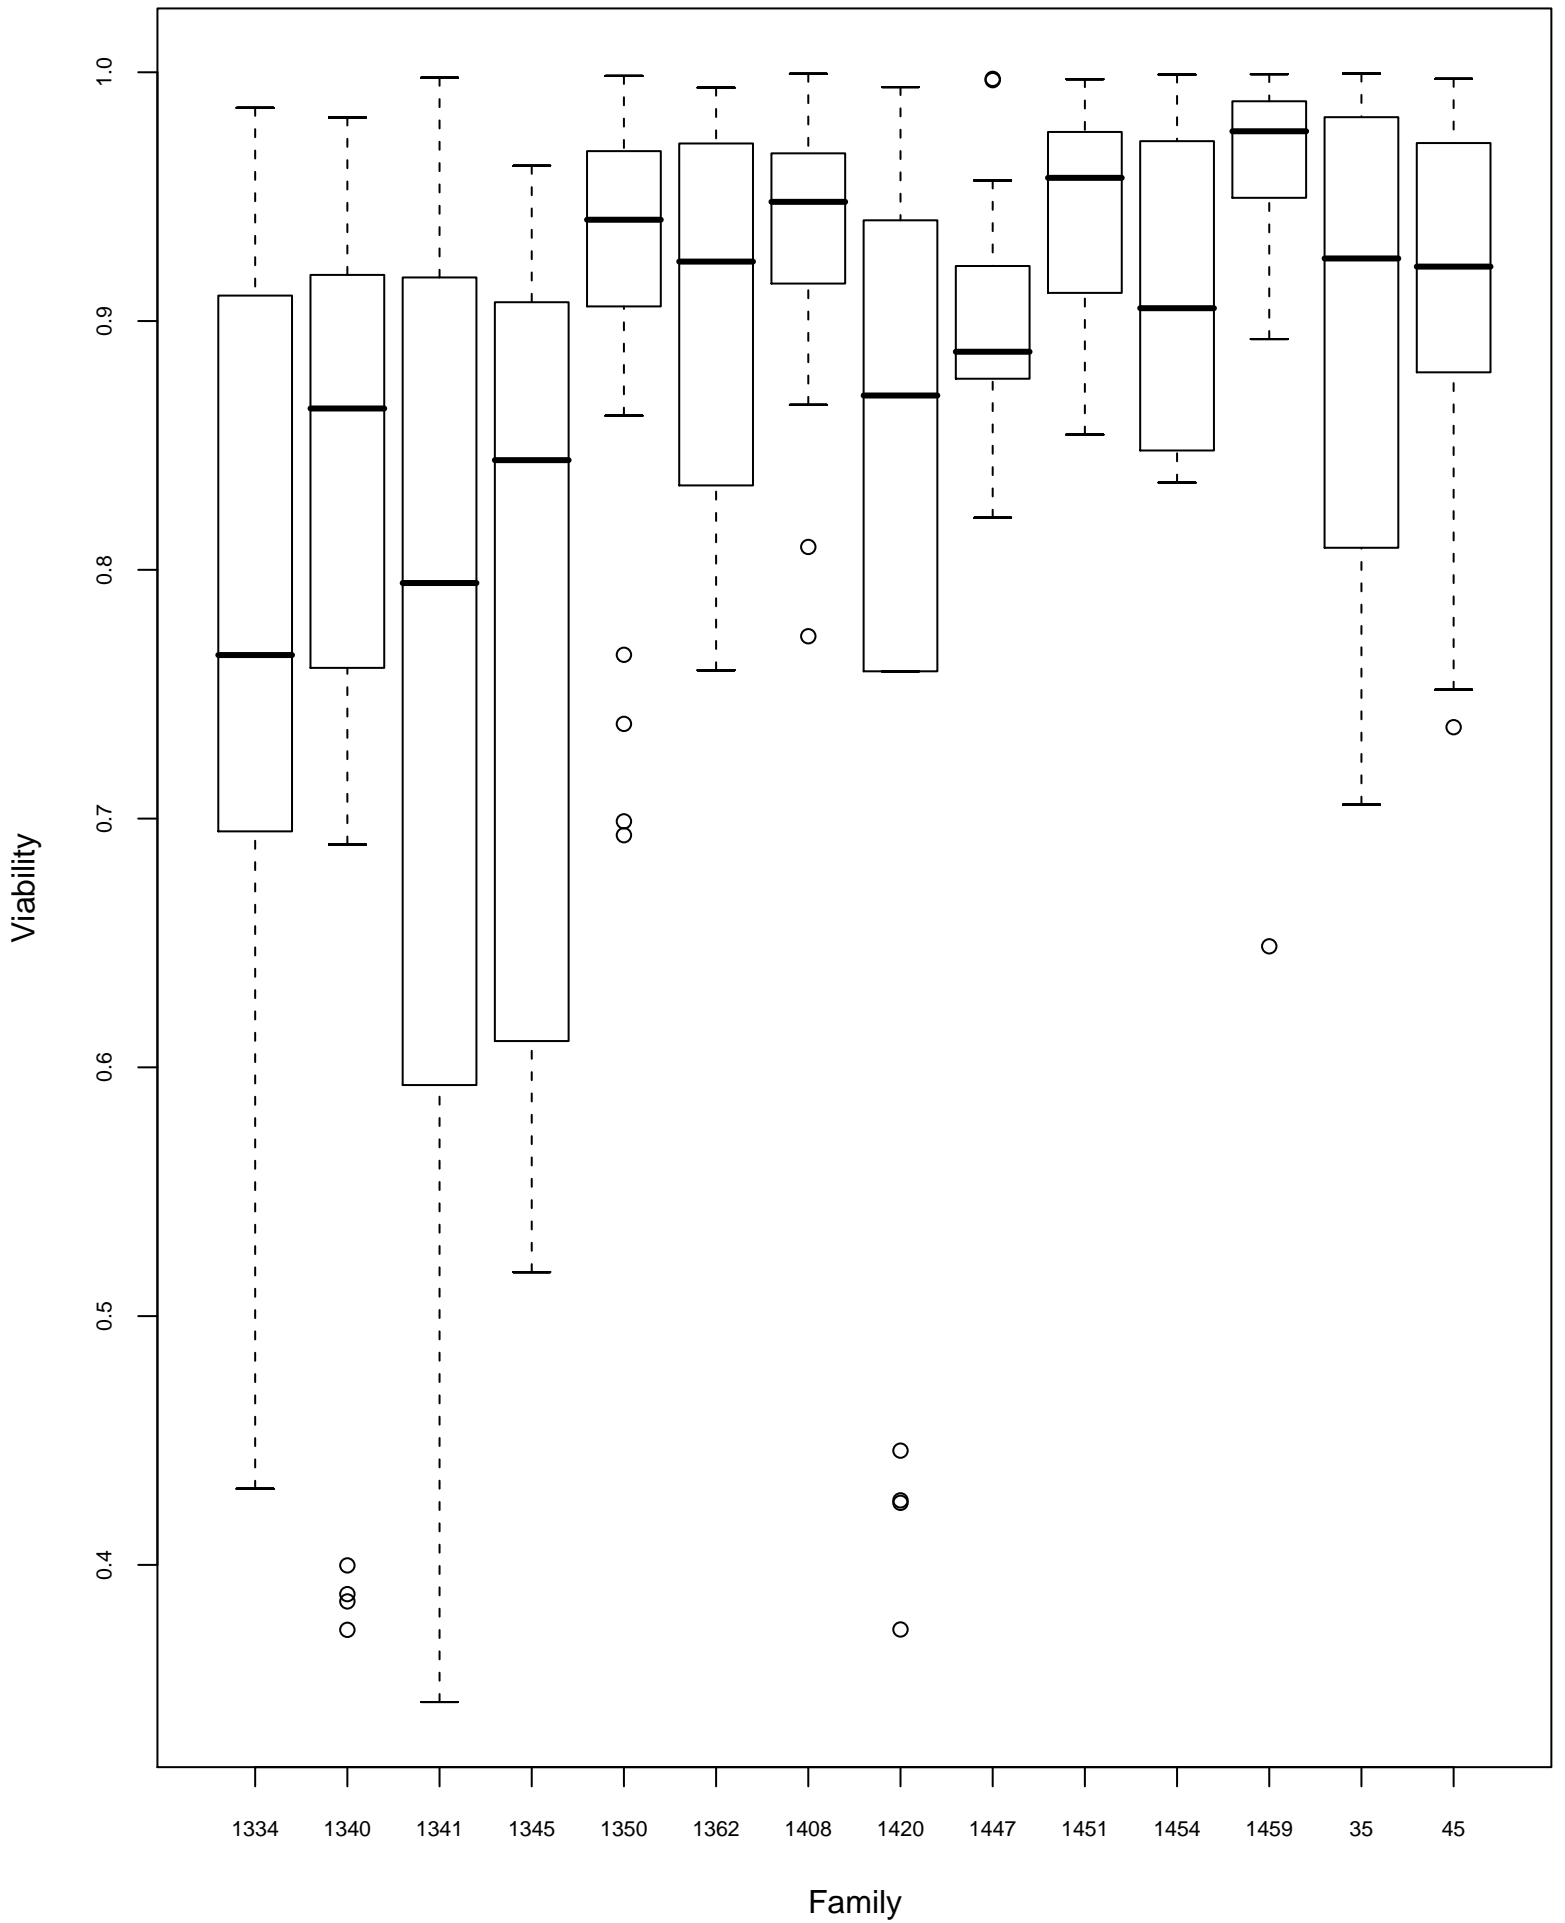



# Drug Dox, dose 5e-05 (mM)

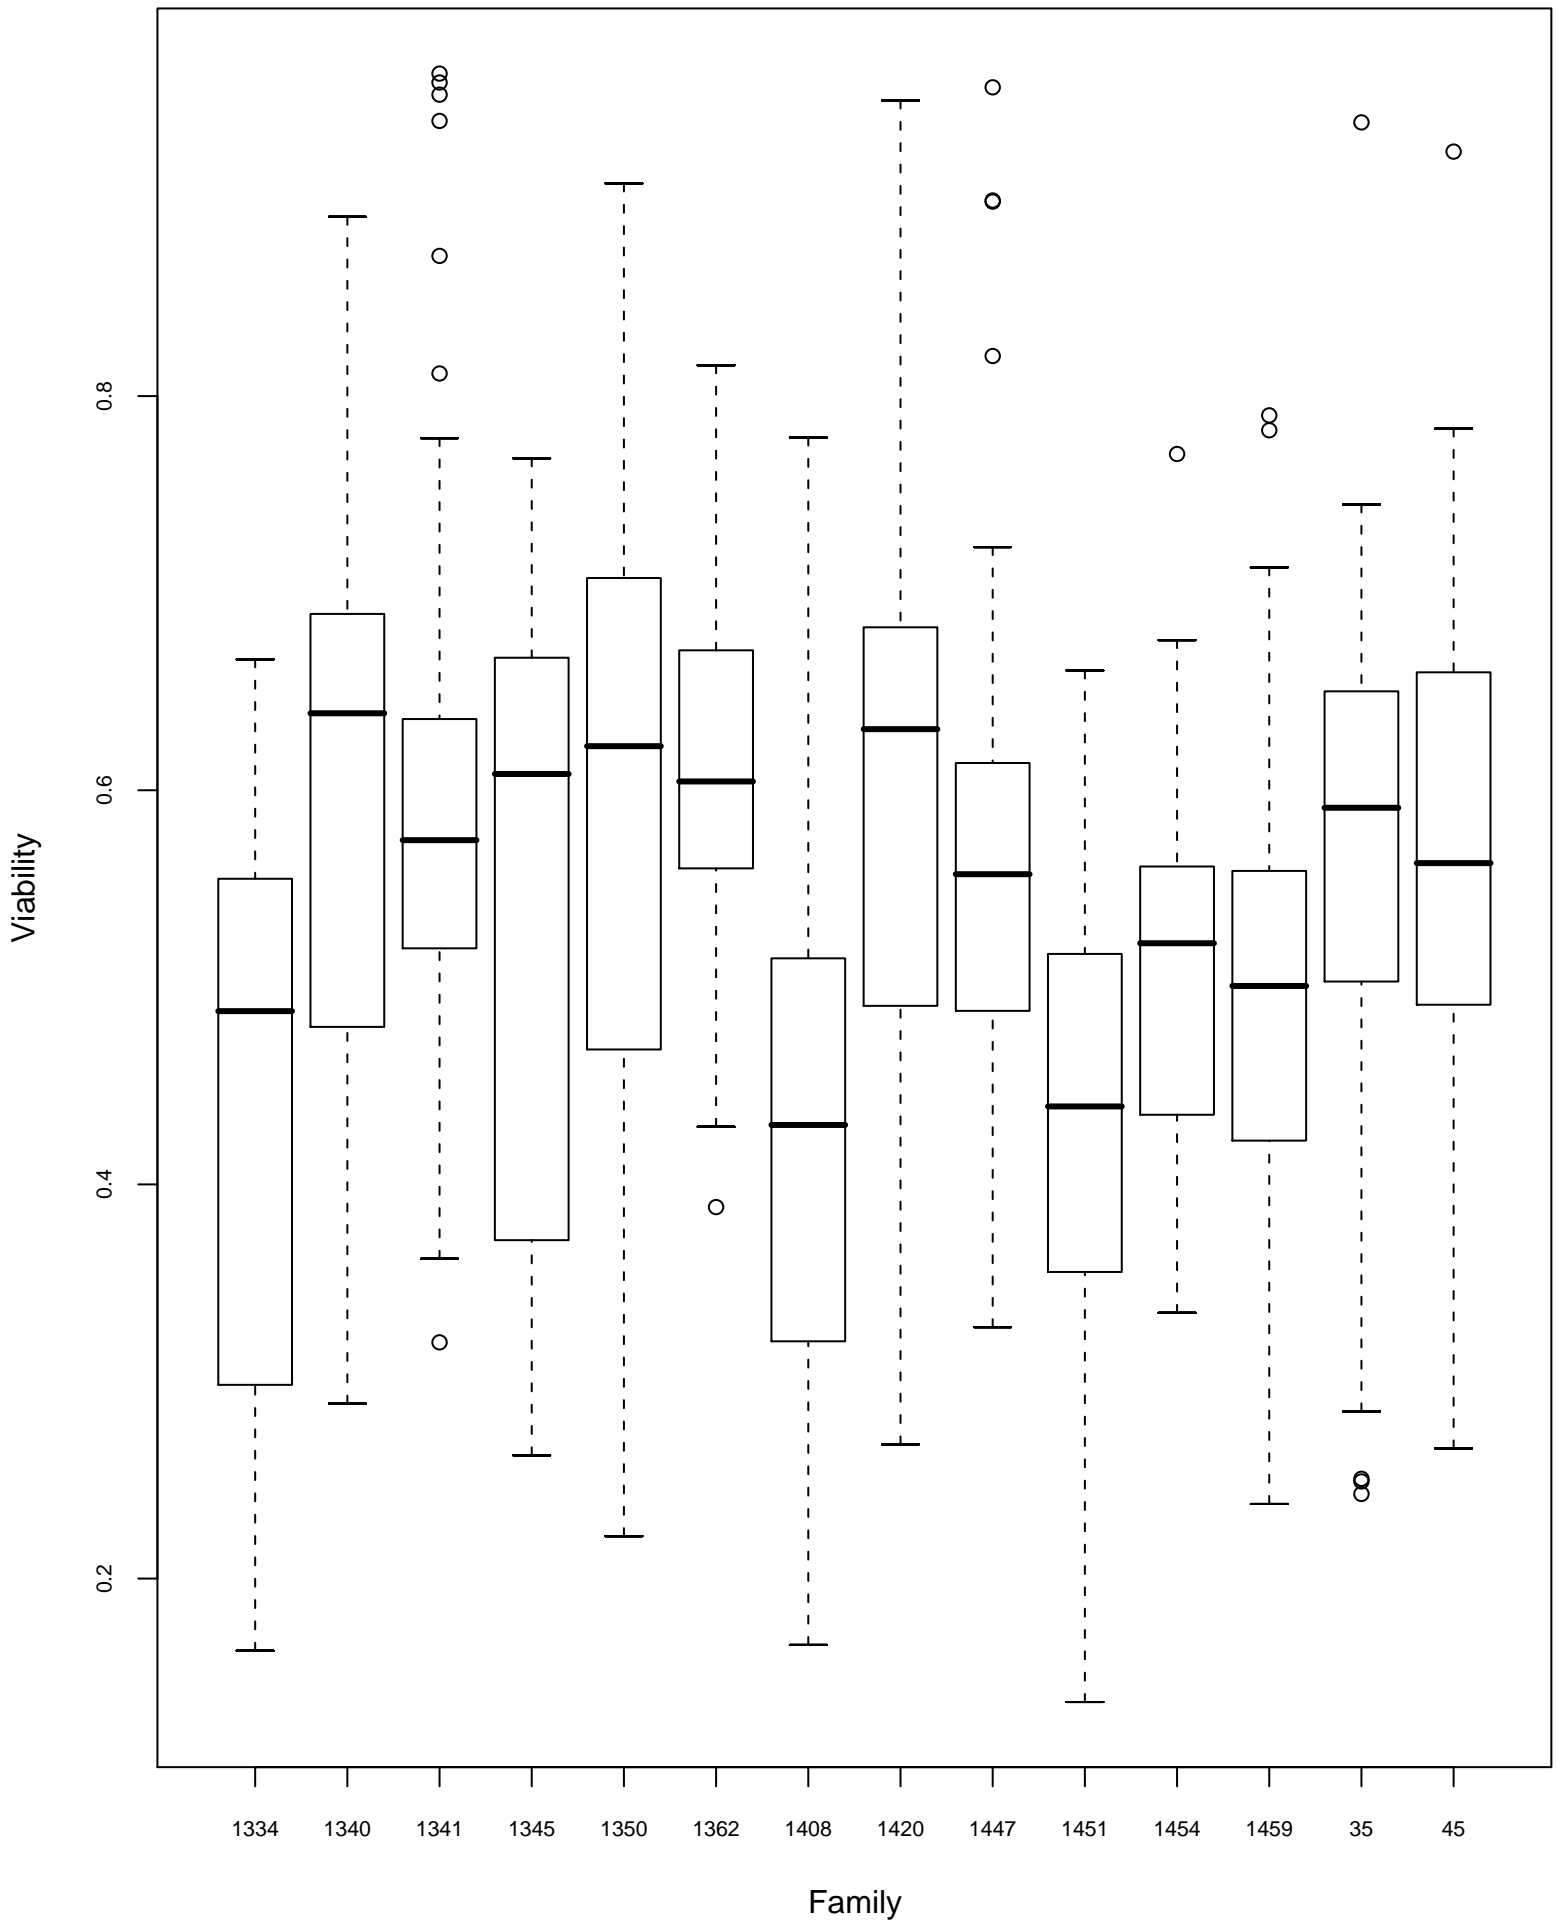

# Drug Dox, dose 2.5e-05 (mM)

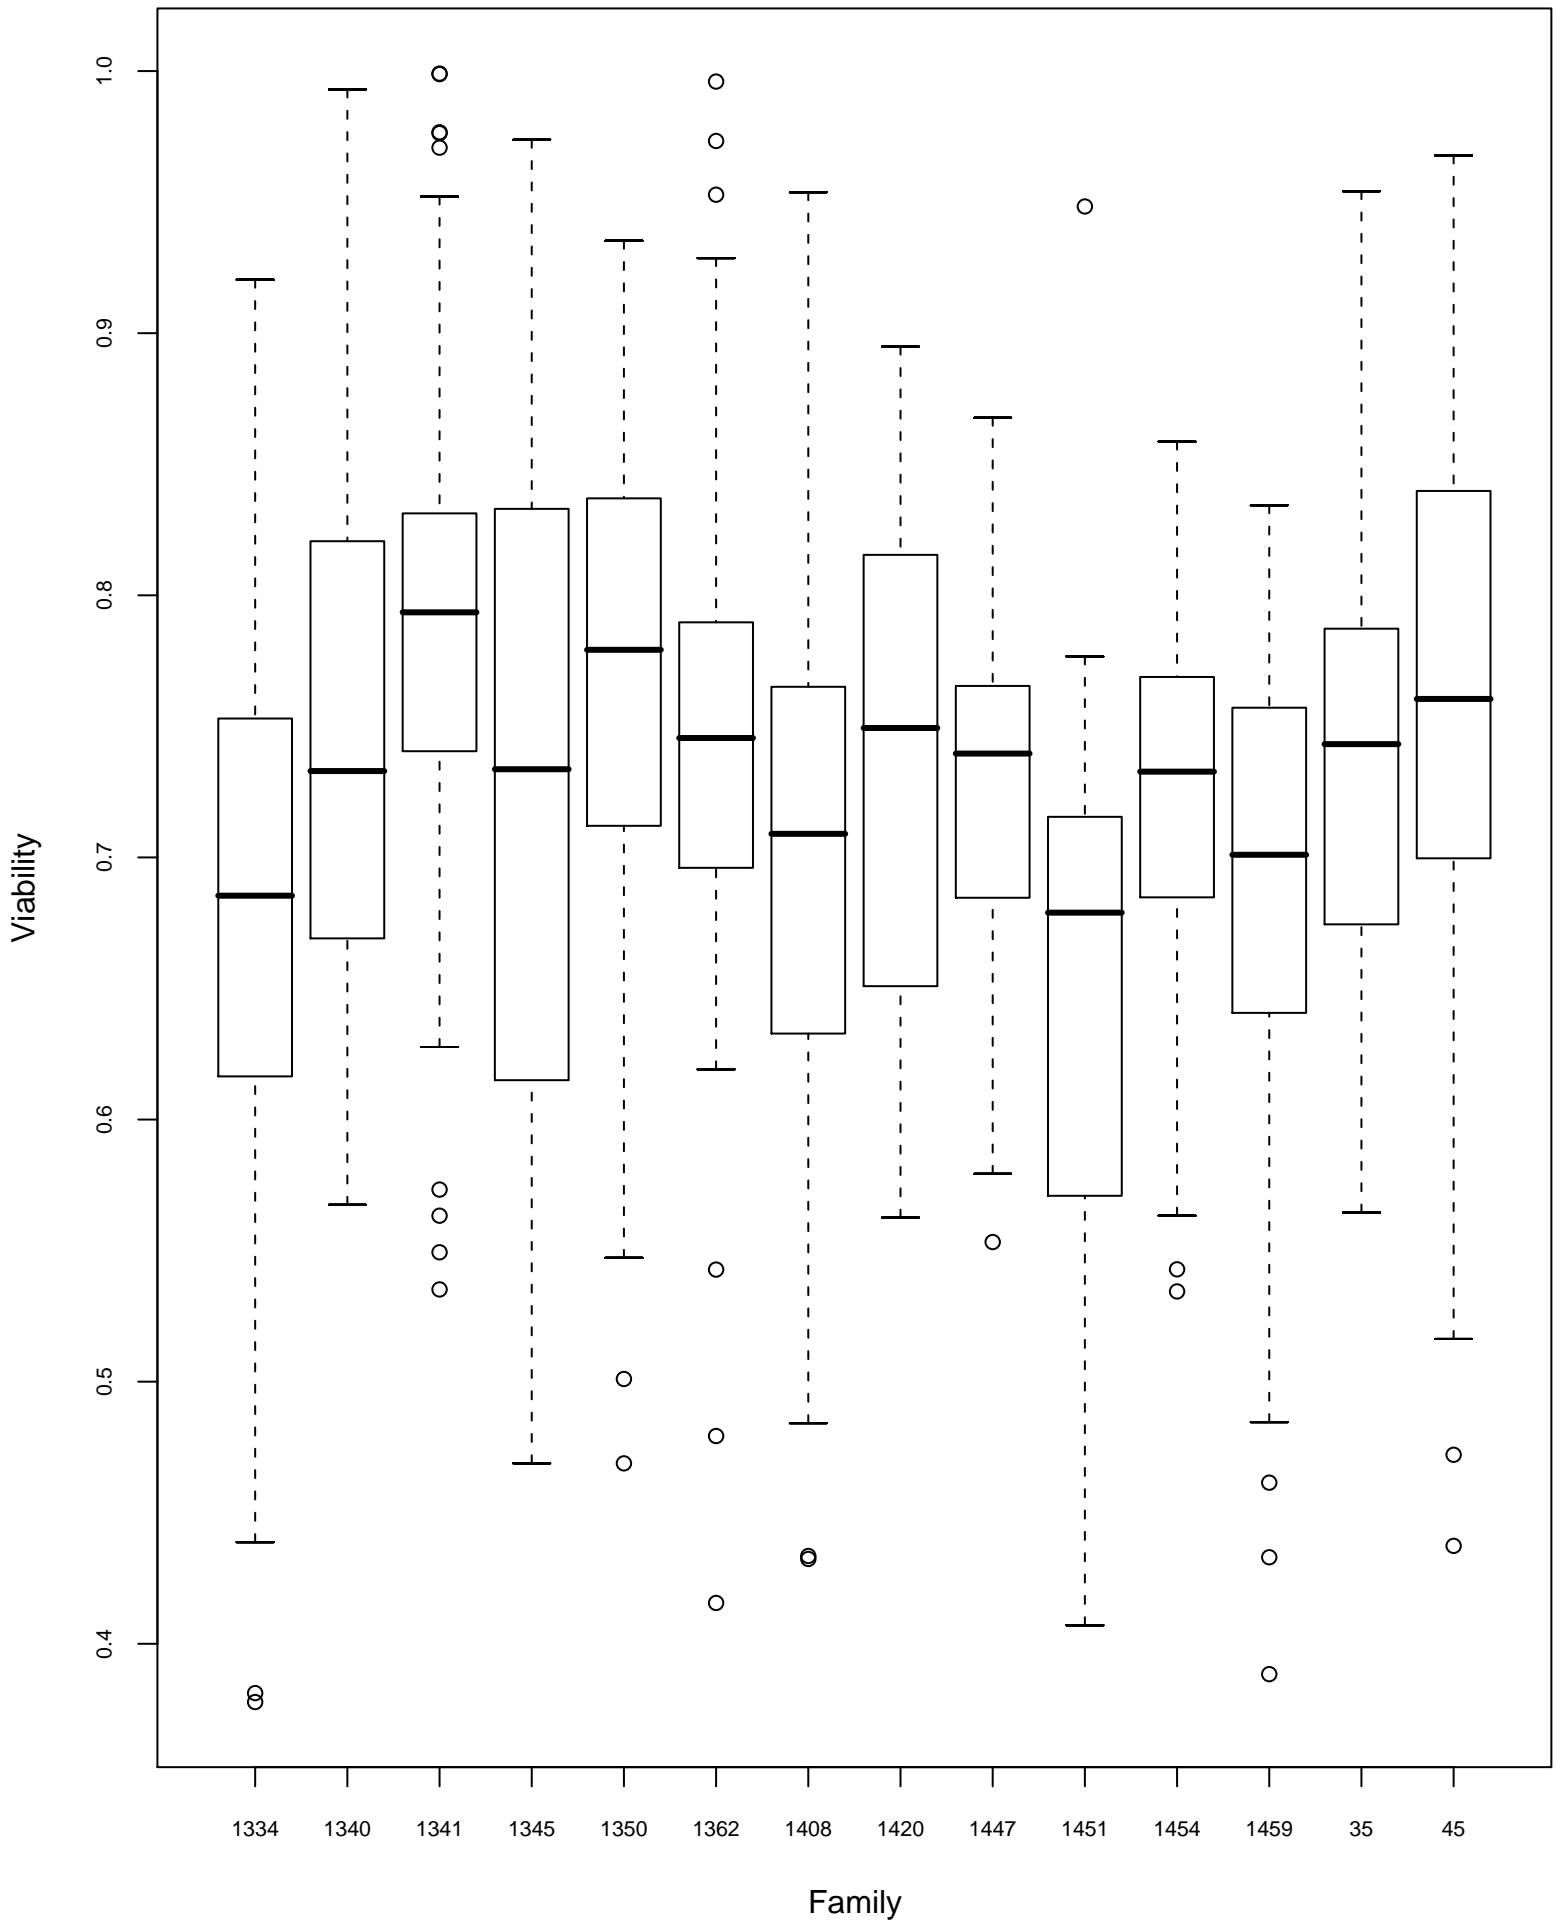

# Drug Dox, dose 1.3e-05 (mM)

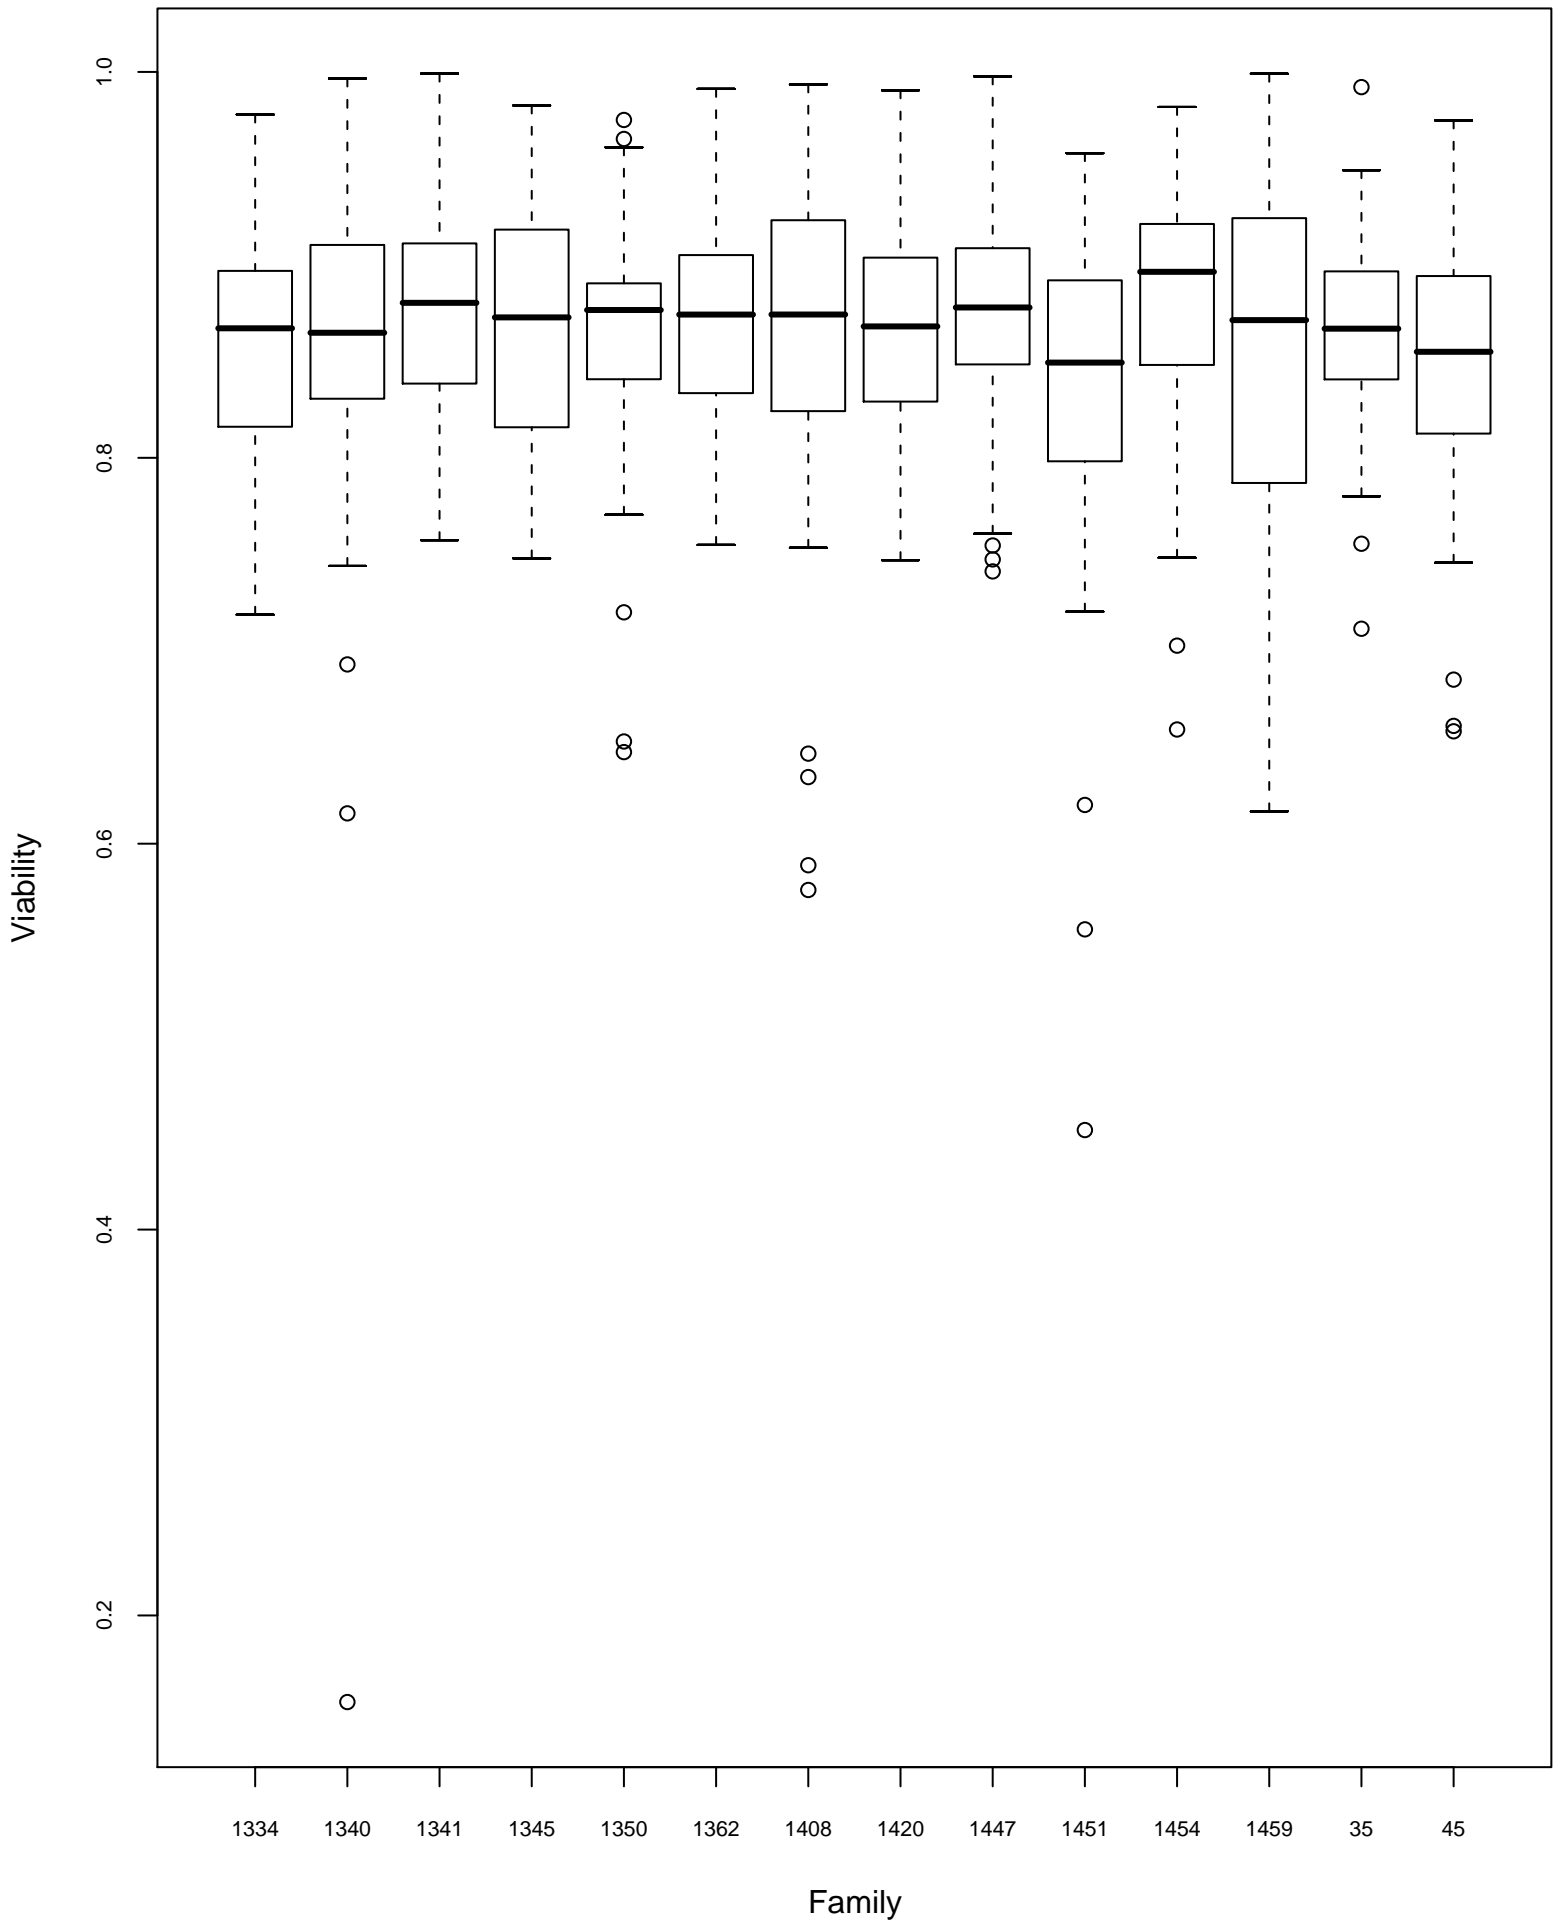

# Drug Dox, dose 6e-06 (mM)

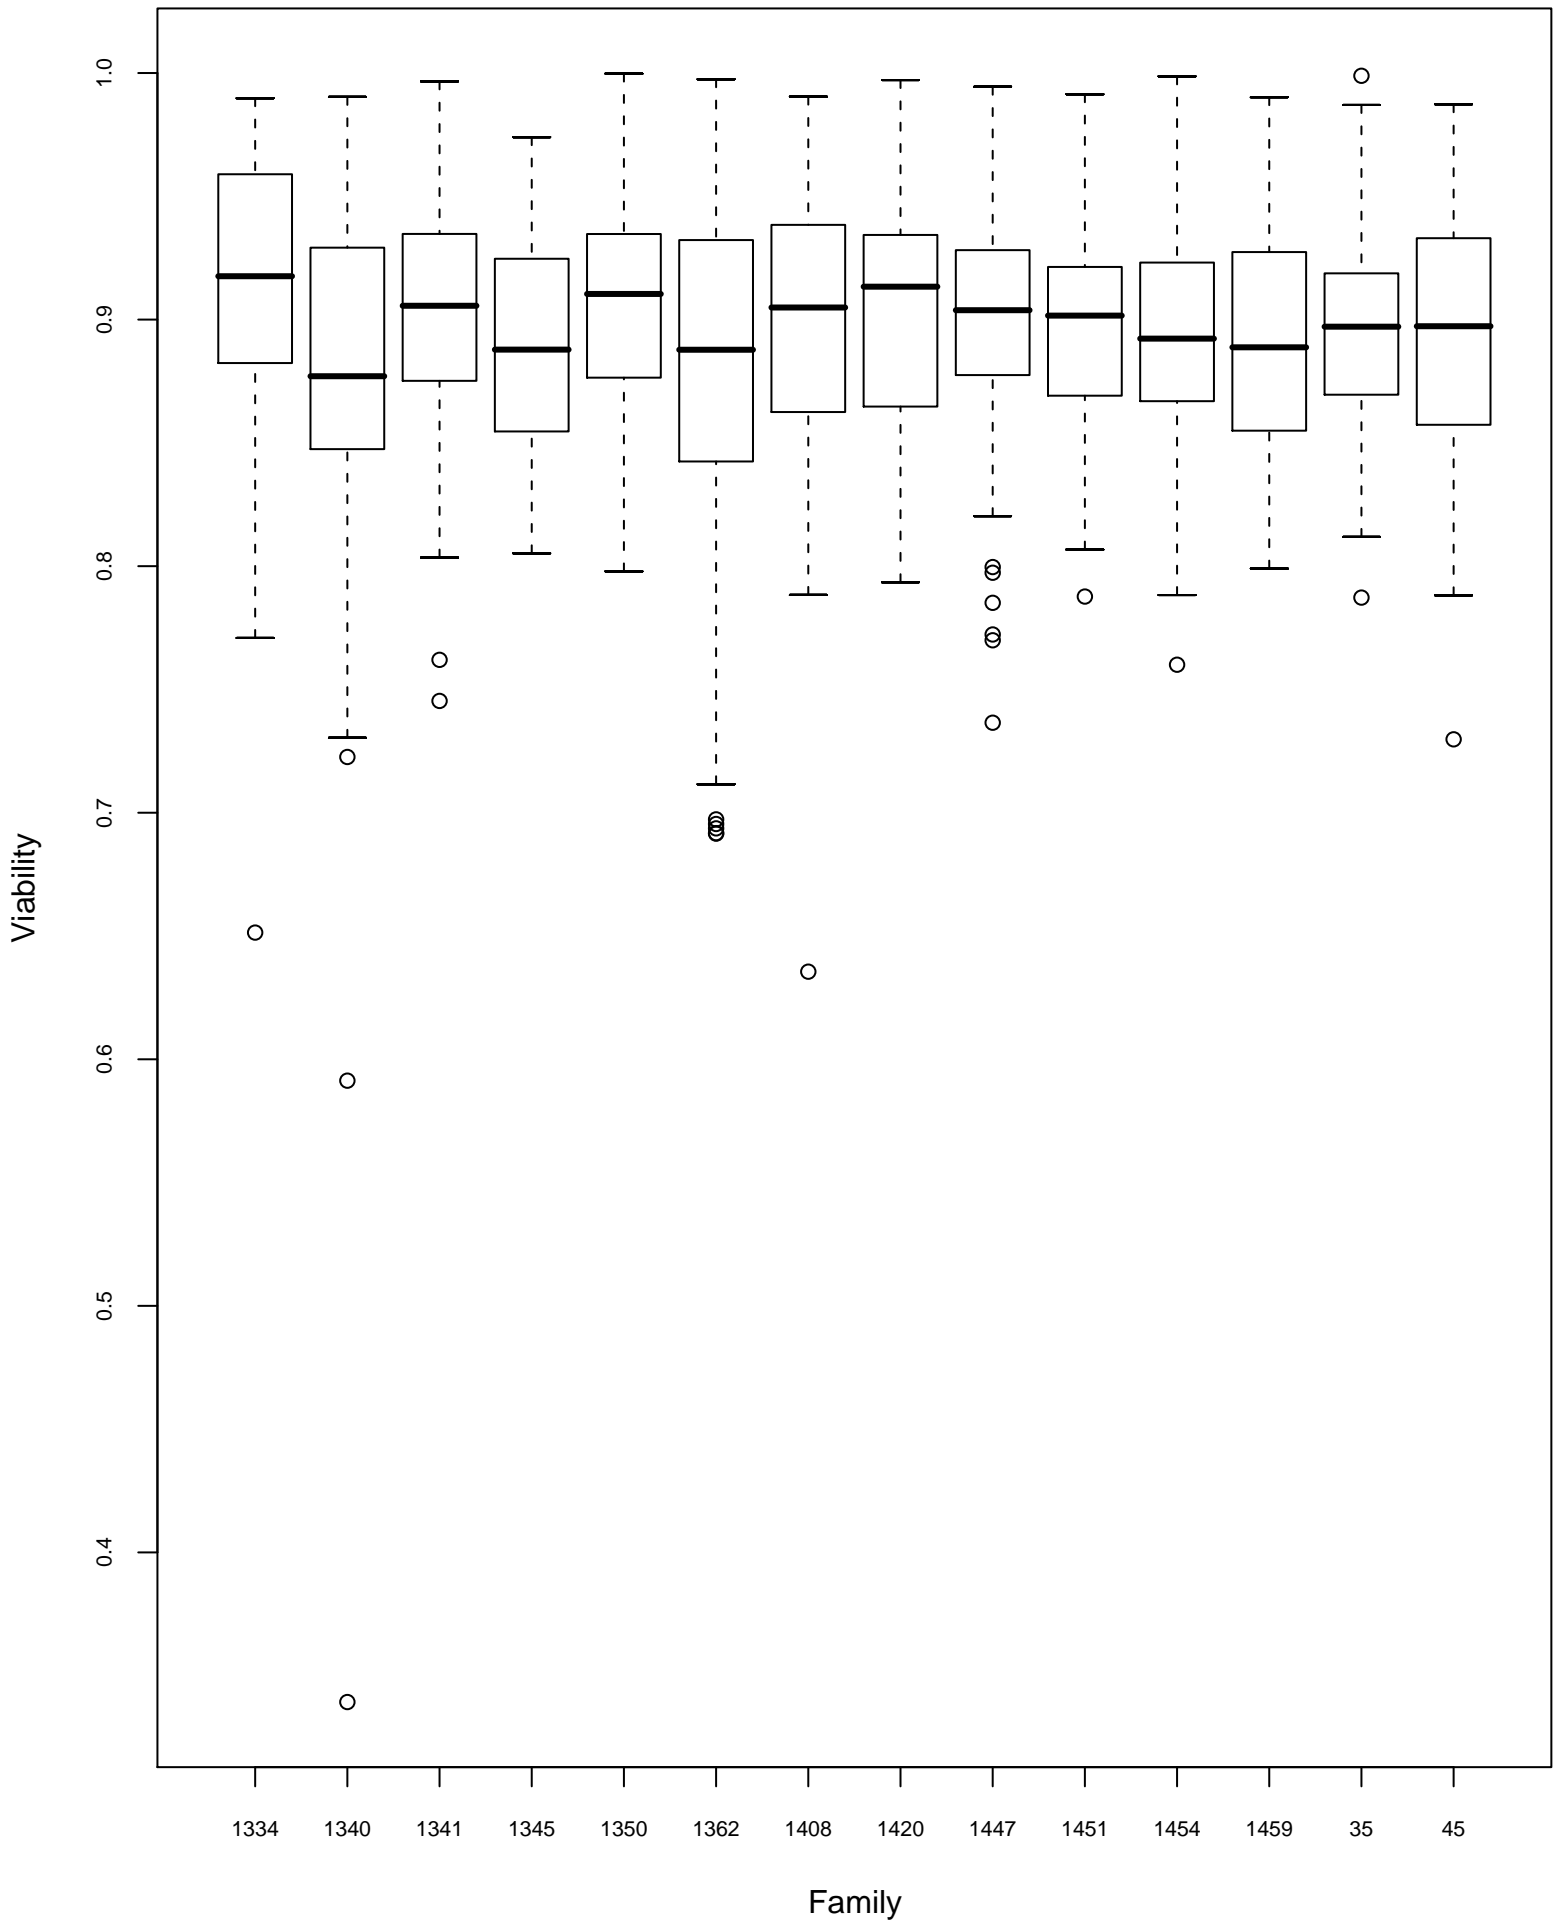

# Drug Epi, dose 0.0004 (mM)

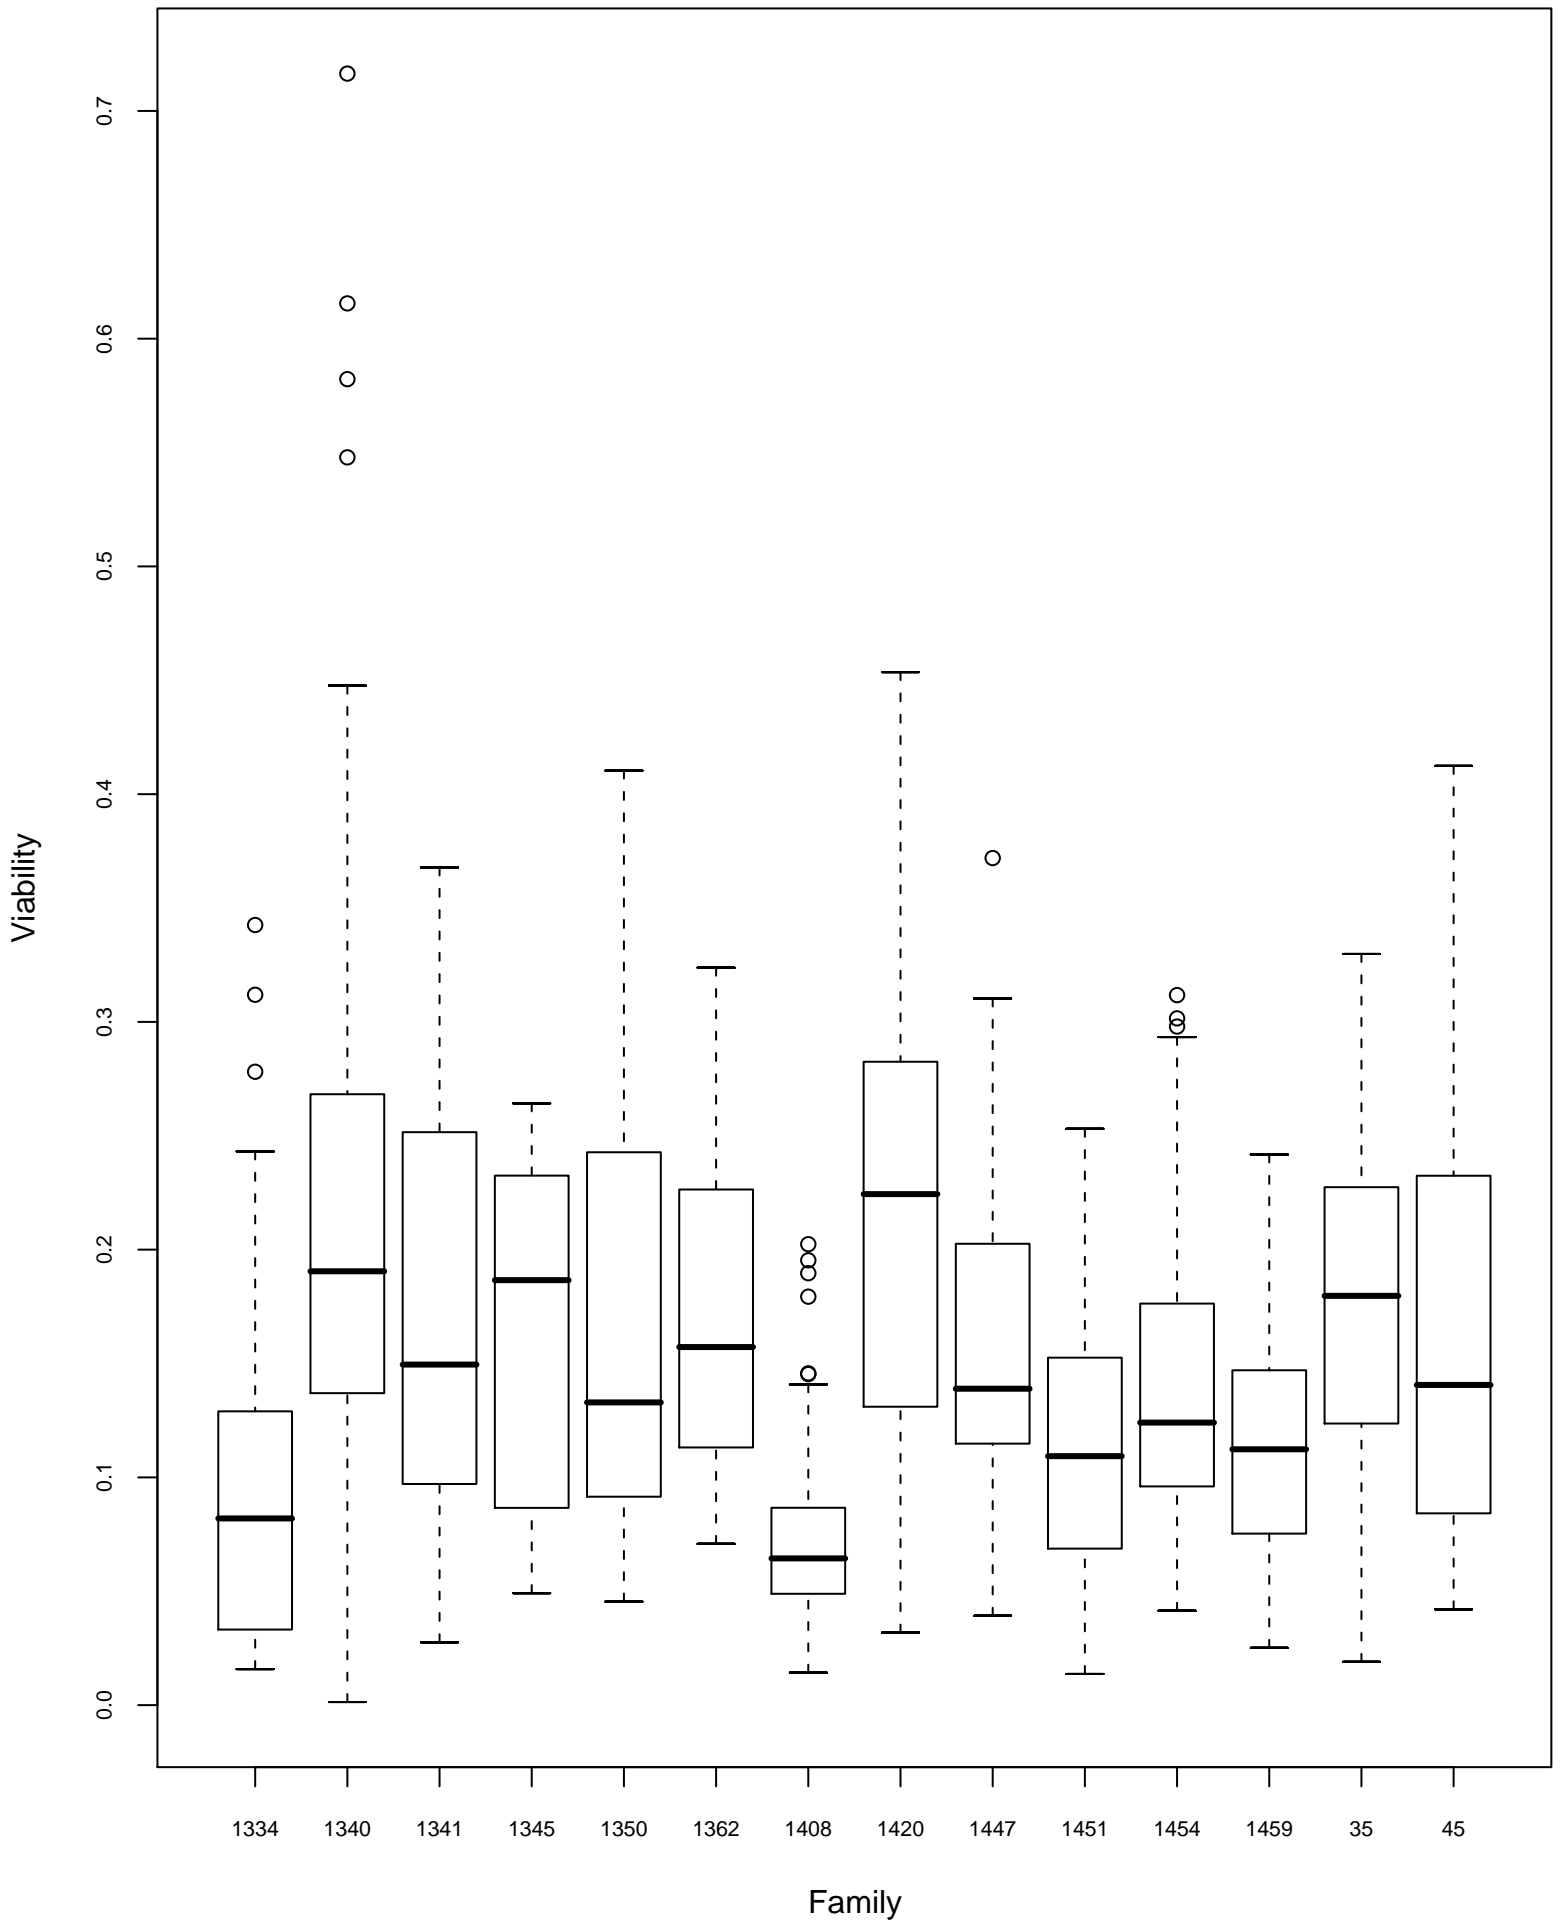

# Drug Epi, dose 0.0001 (mM)

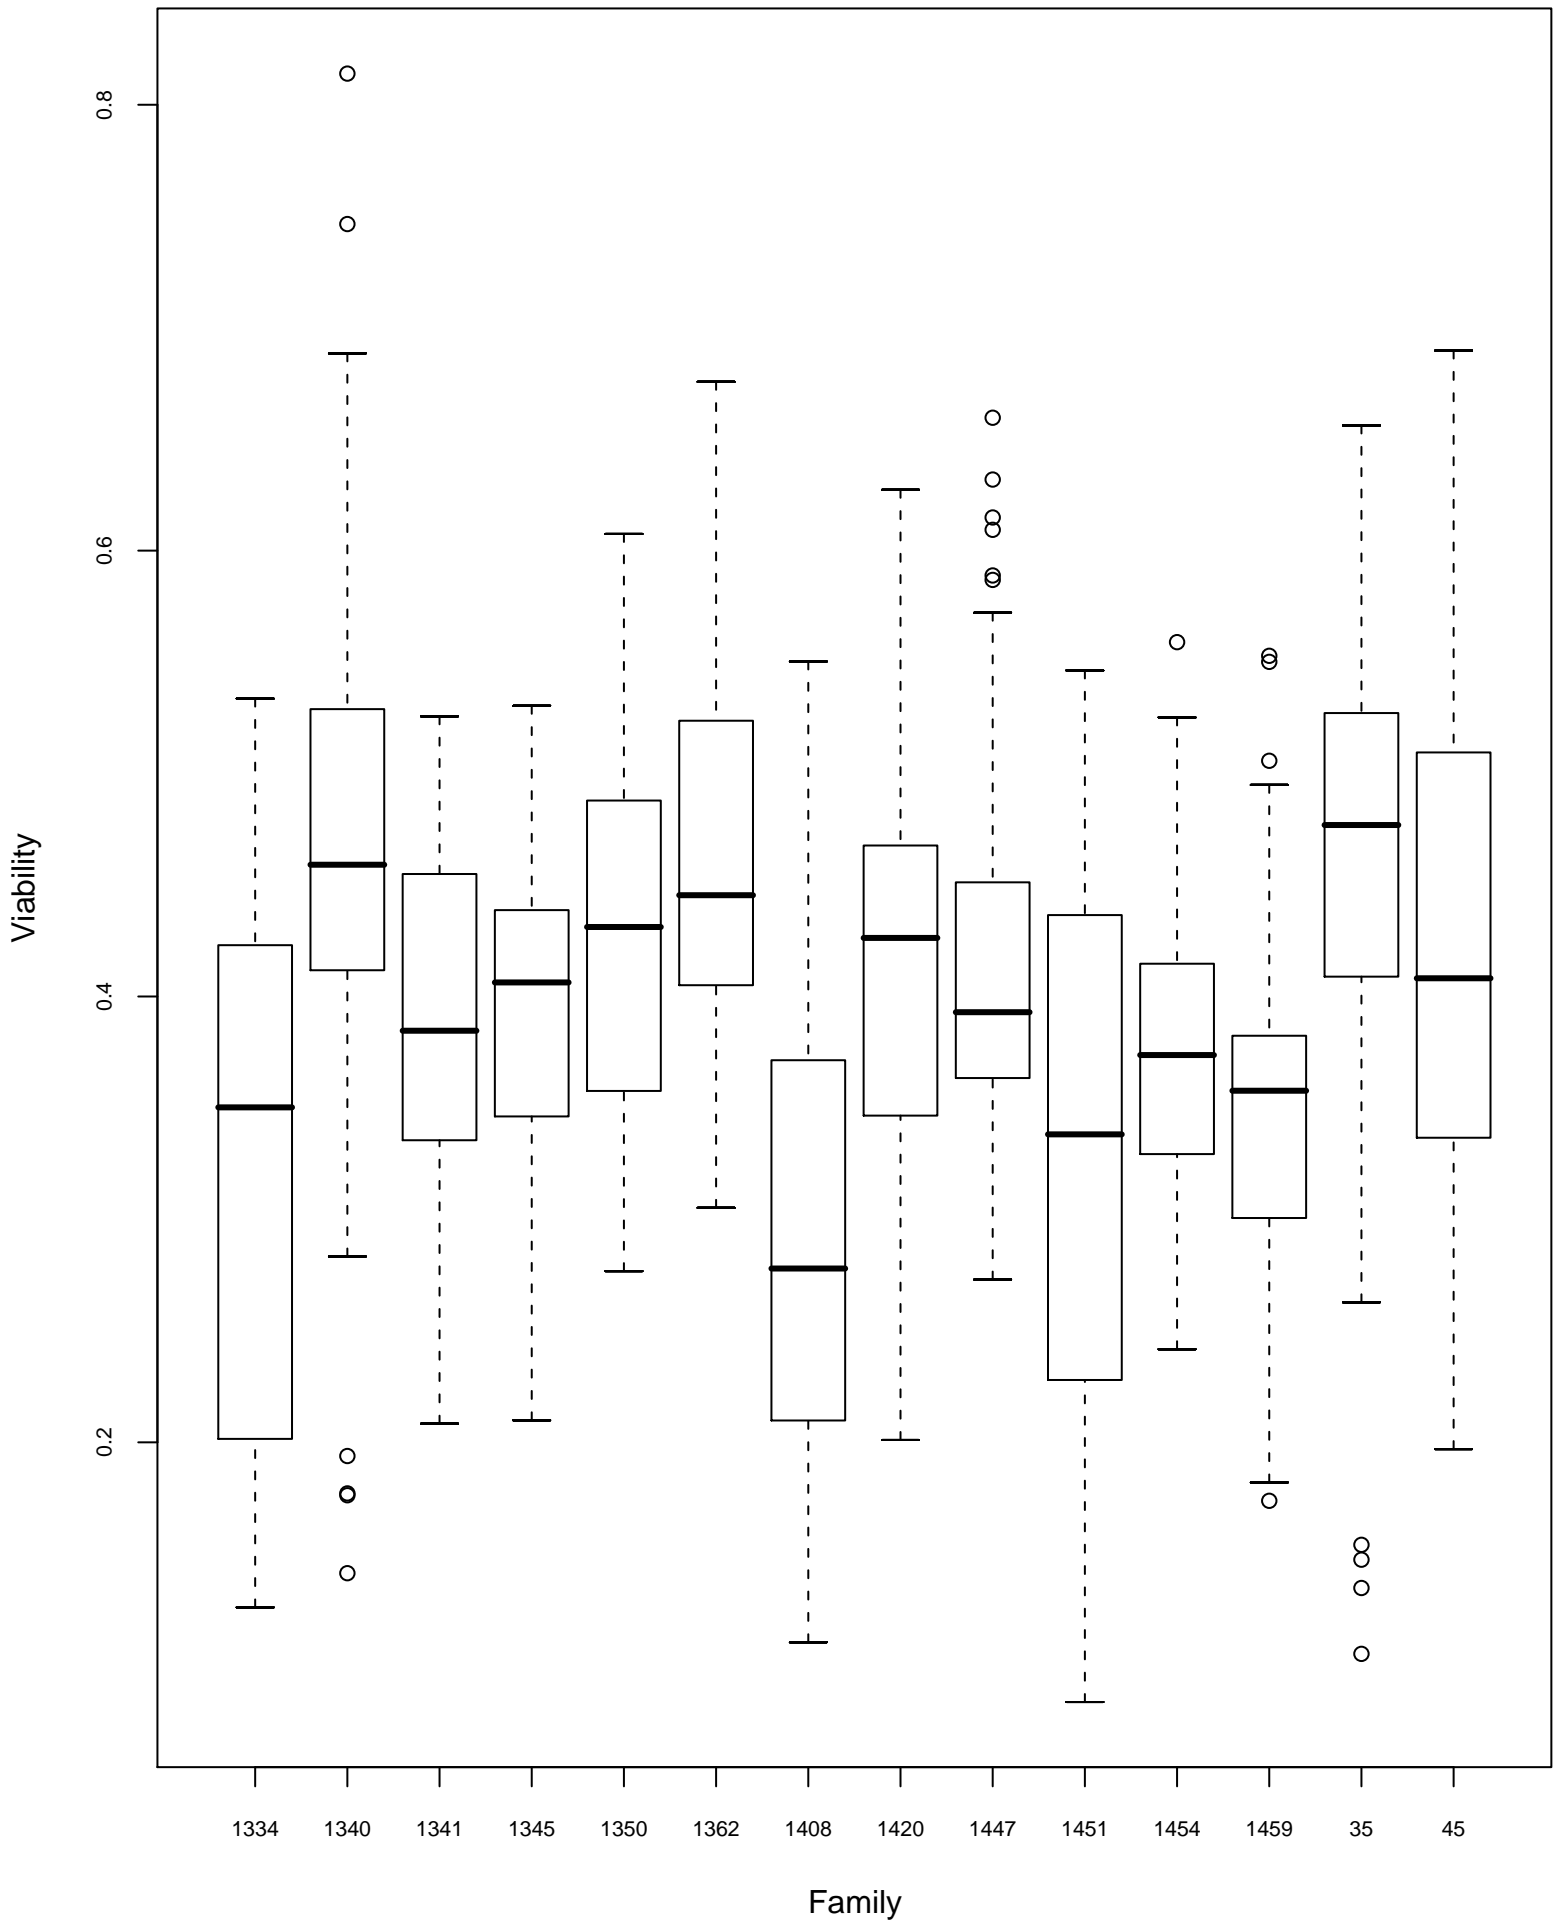

# Drug Epi, dose 2.5e-05 (mM)

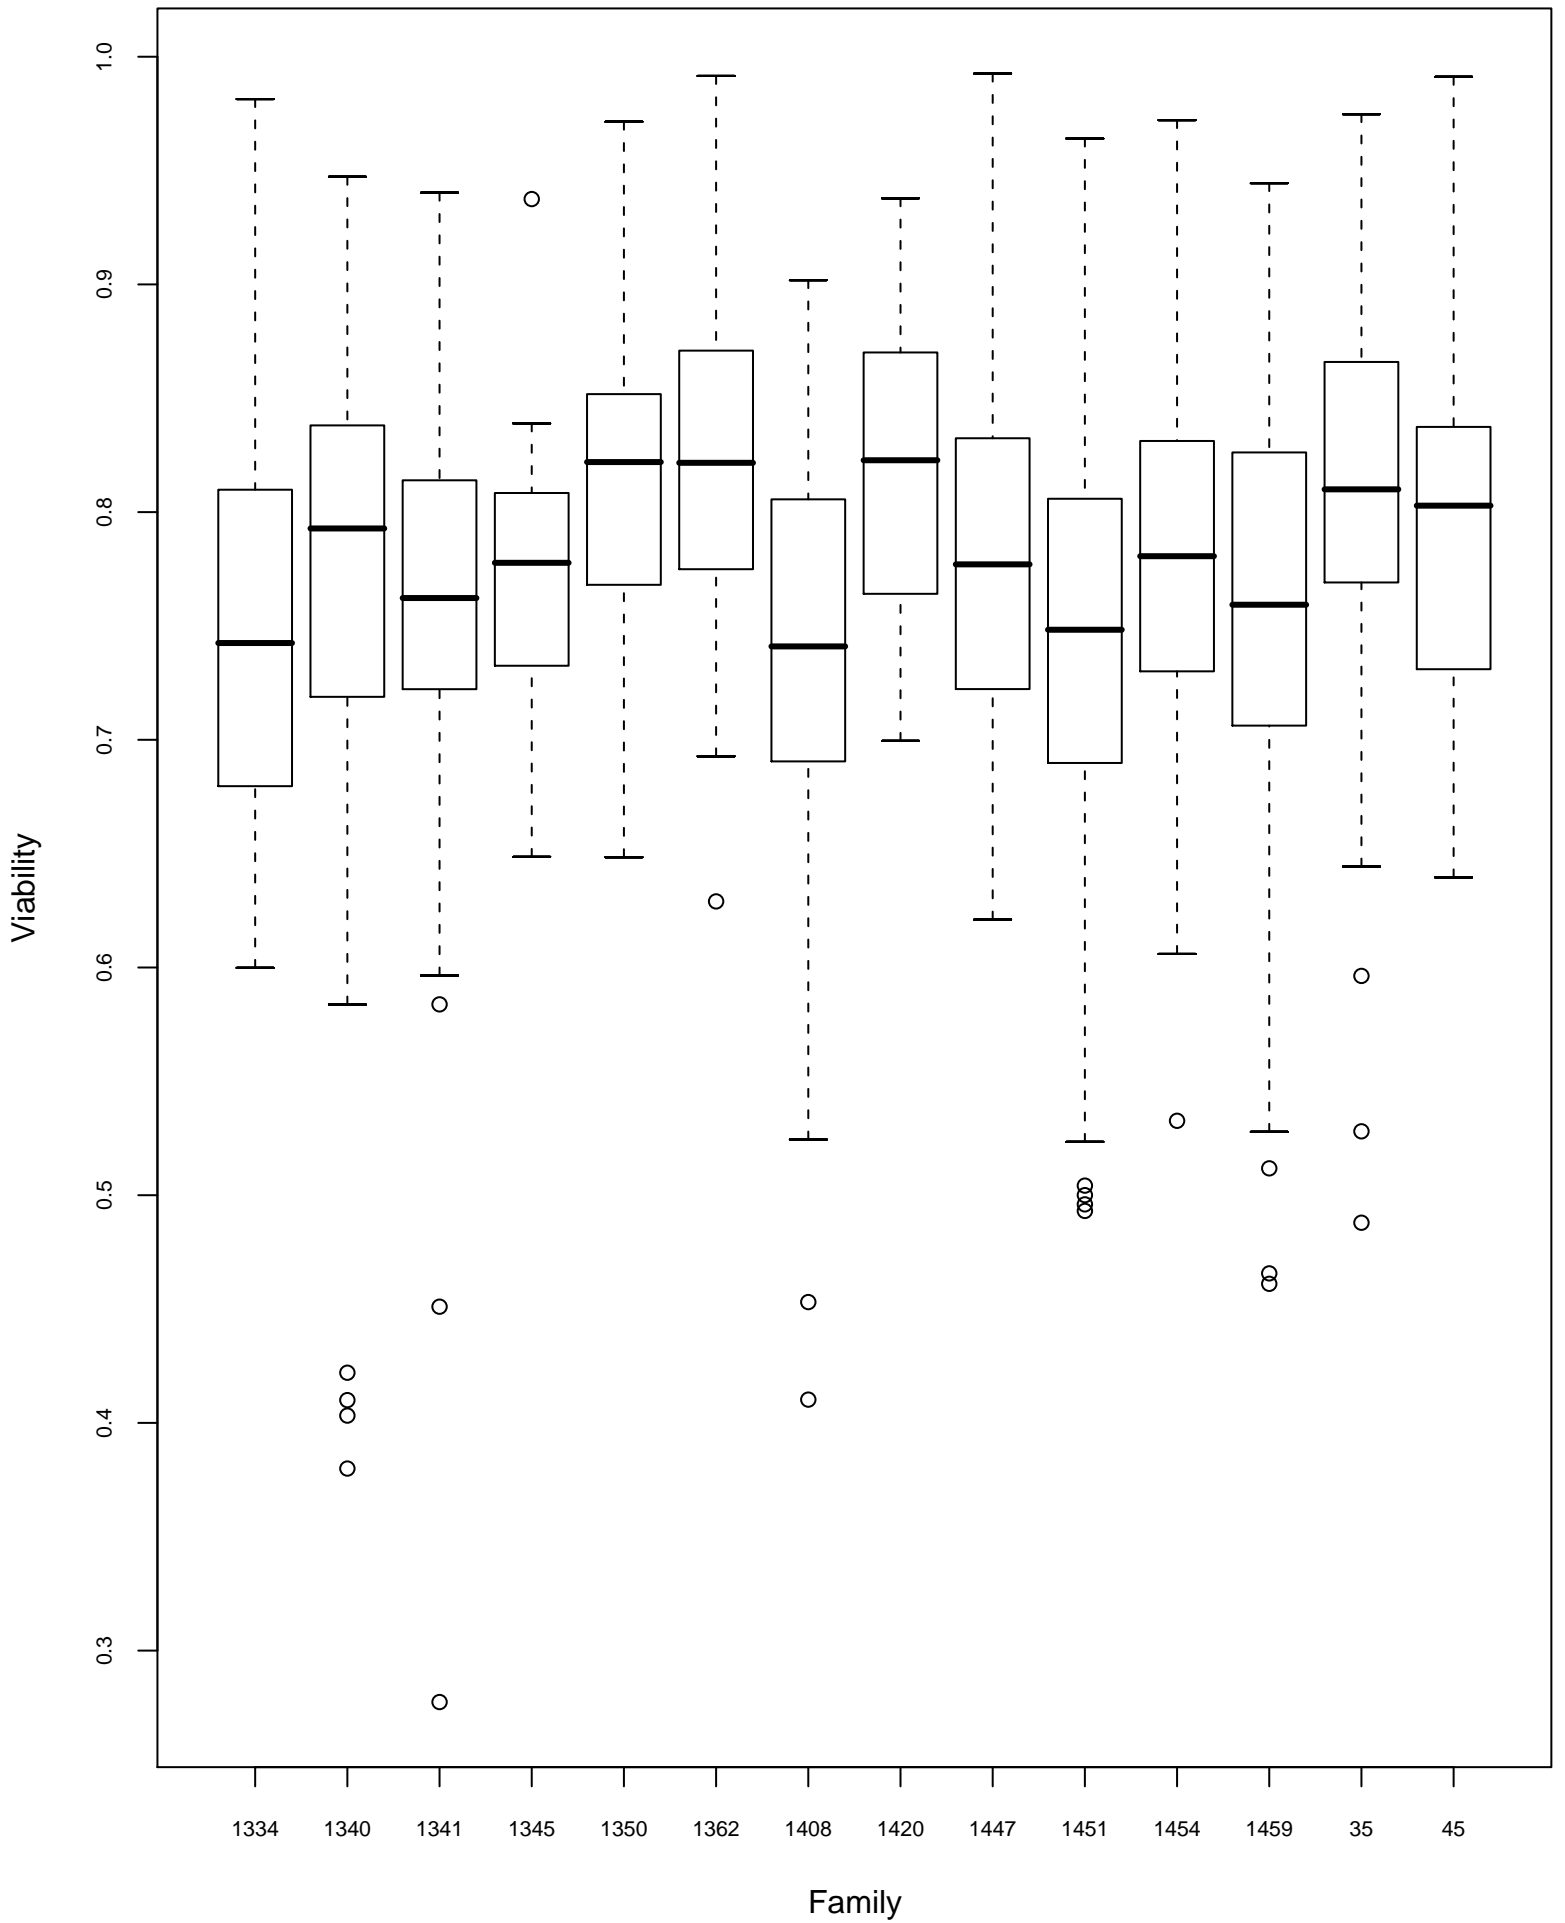

# Drug Epi, dose 6.3e-06 (mM)

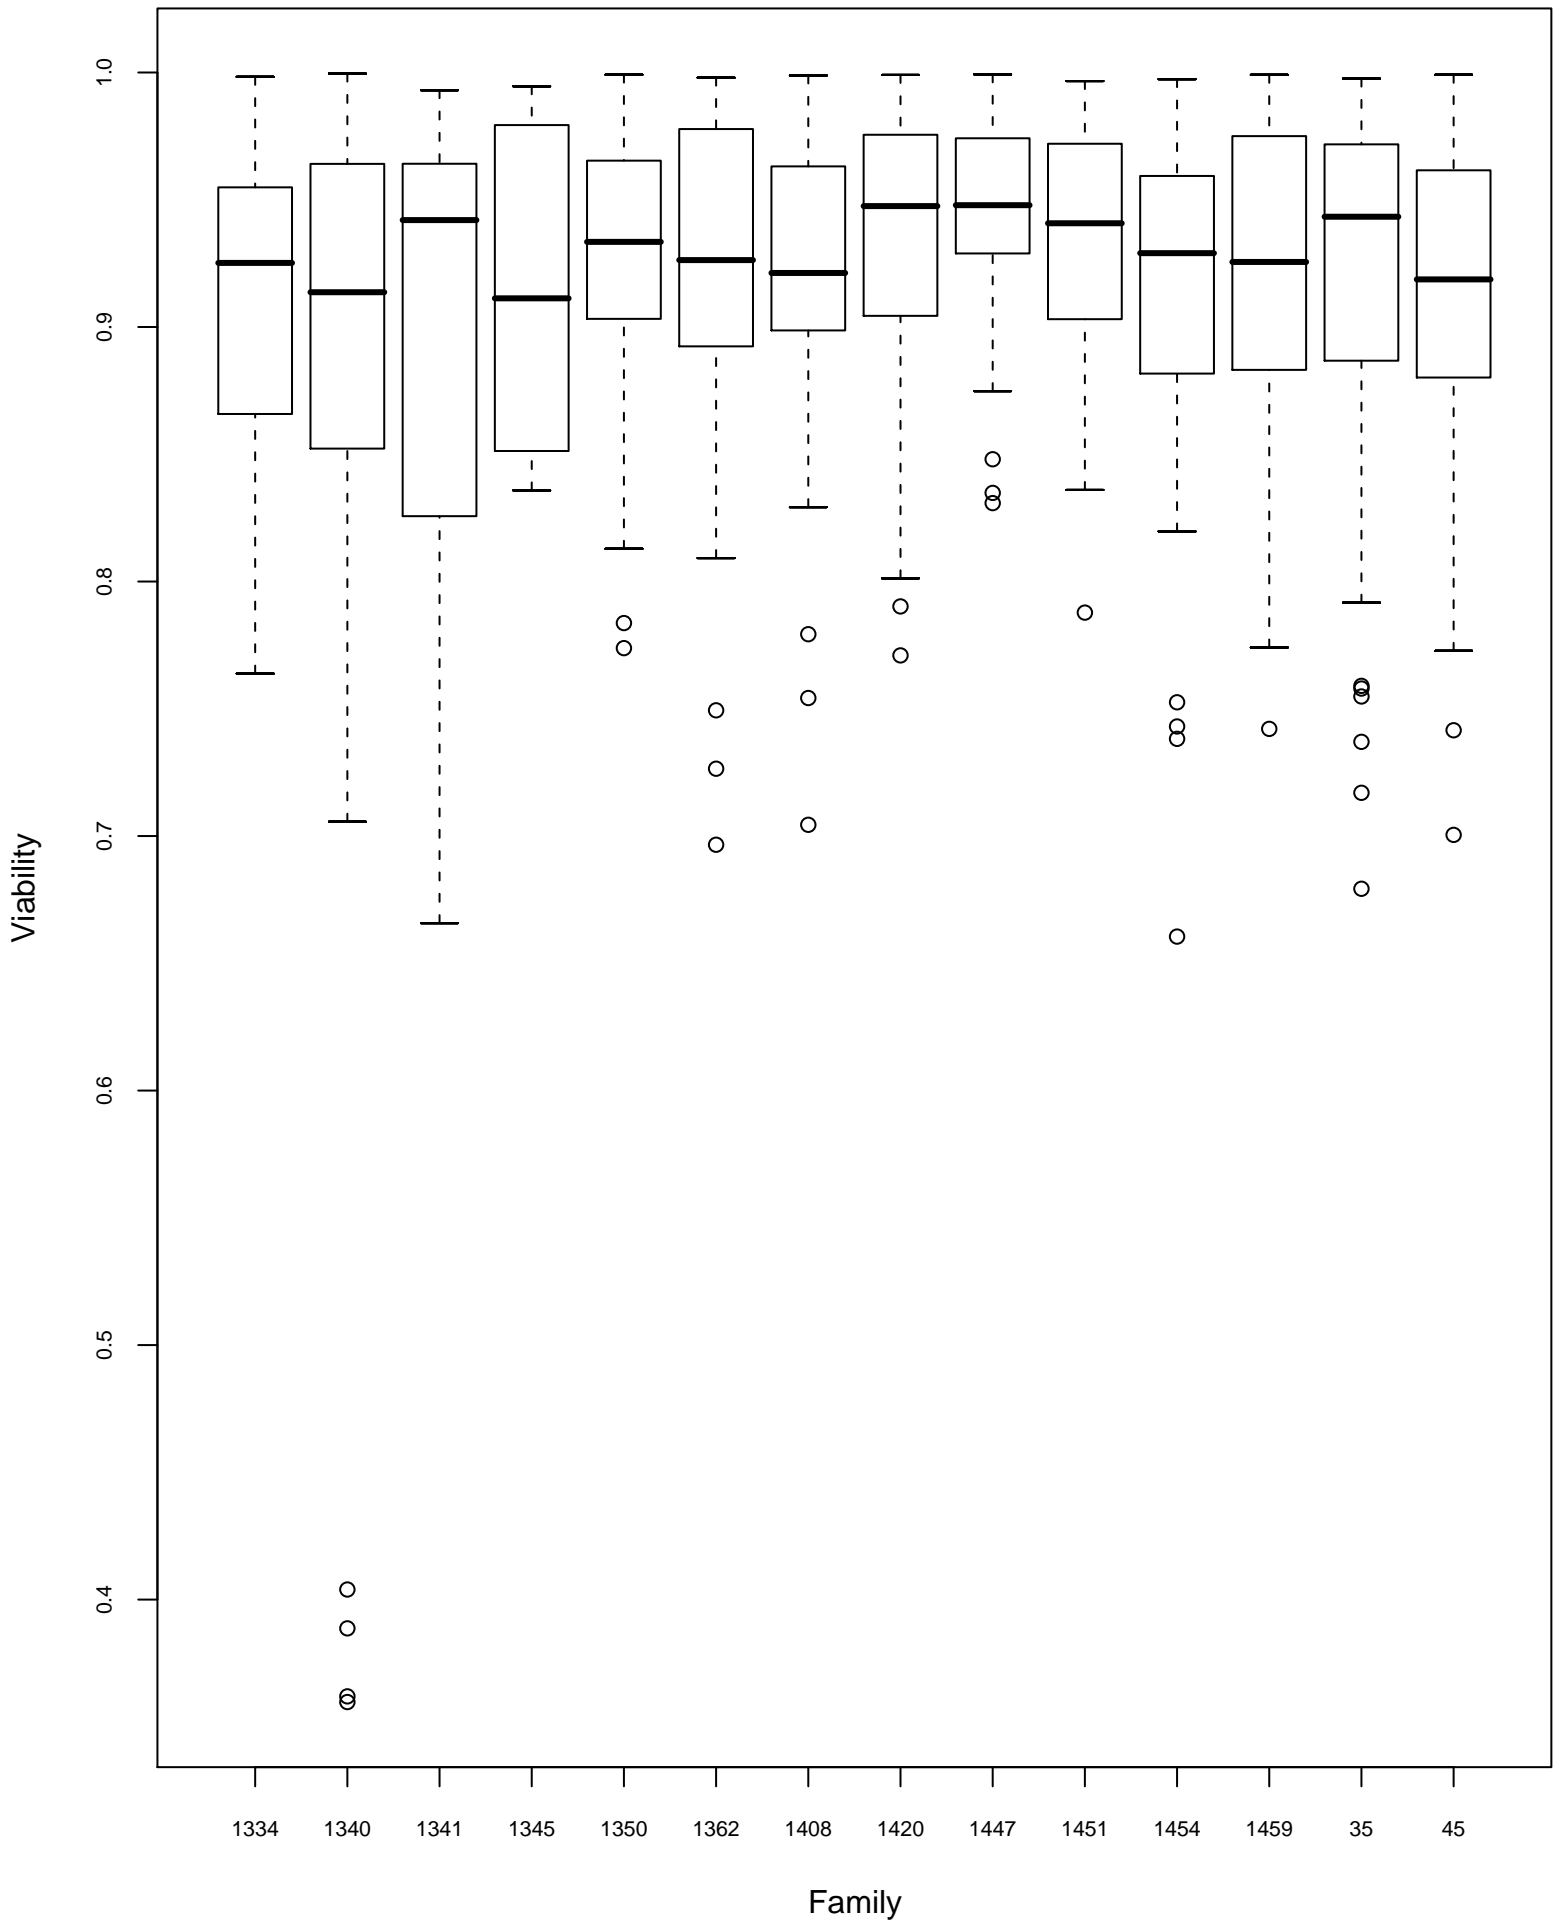



# Drug Etop, dose 0.005 (mM)

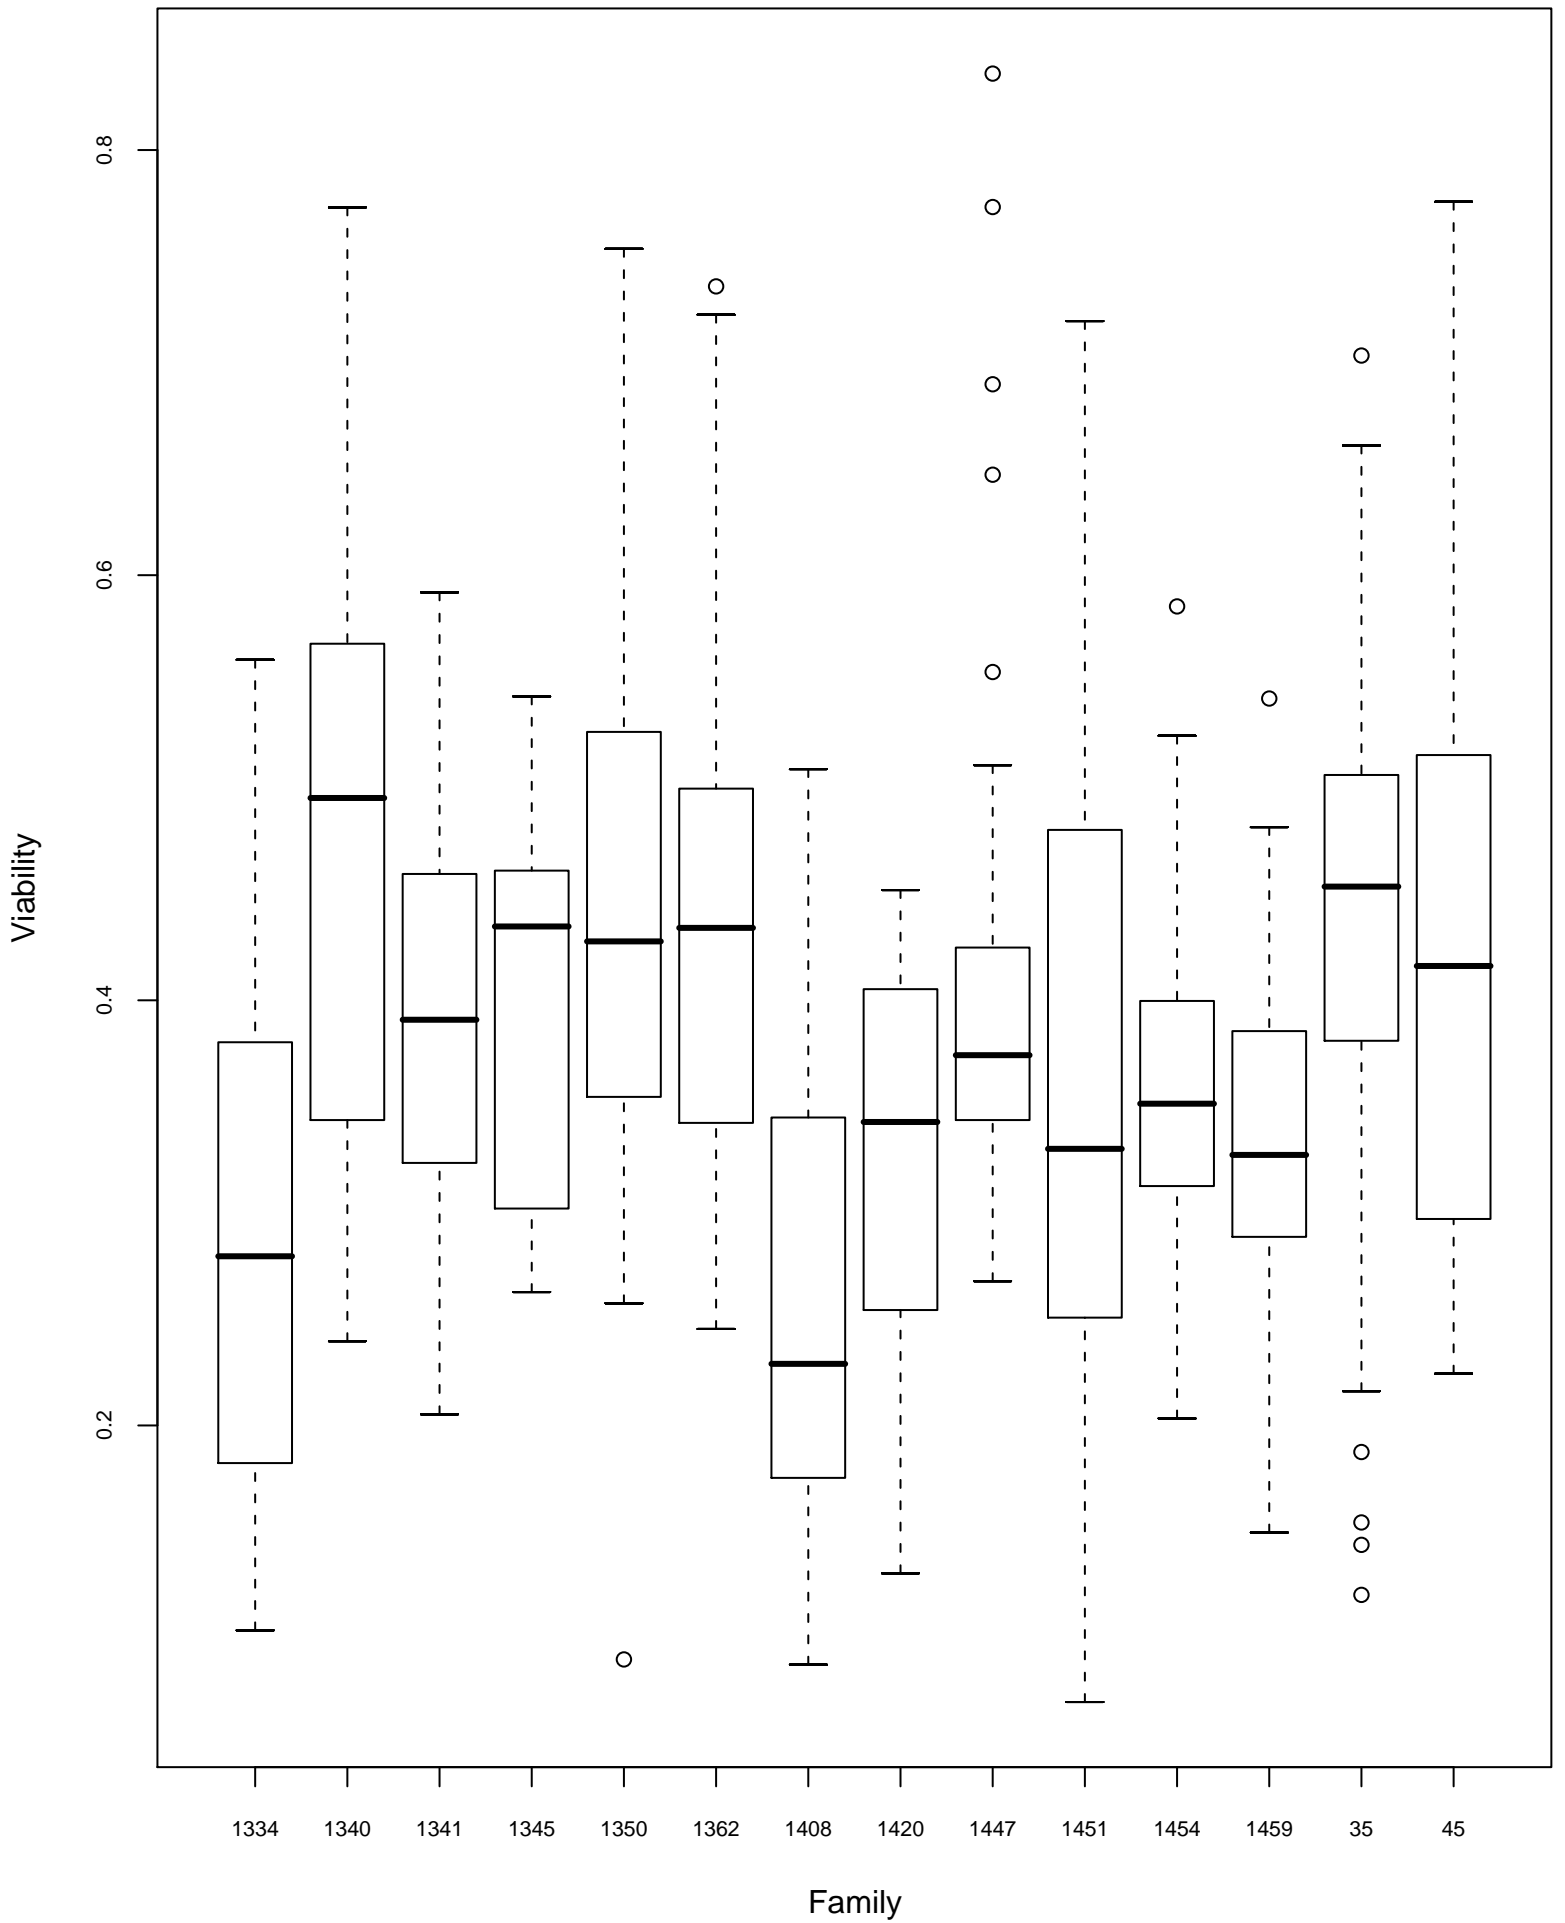

# Drug Etop, dose 0.001429 (mM)

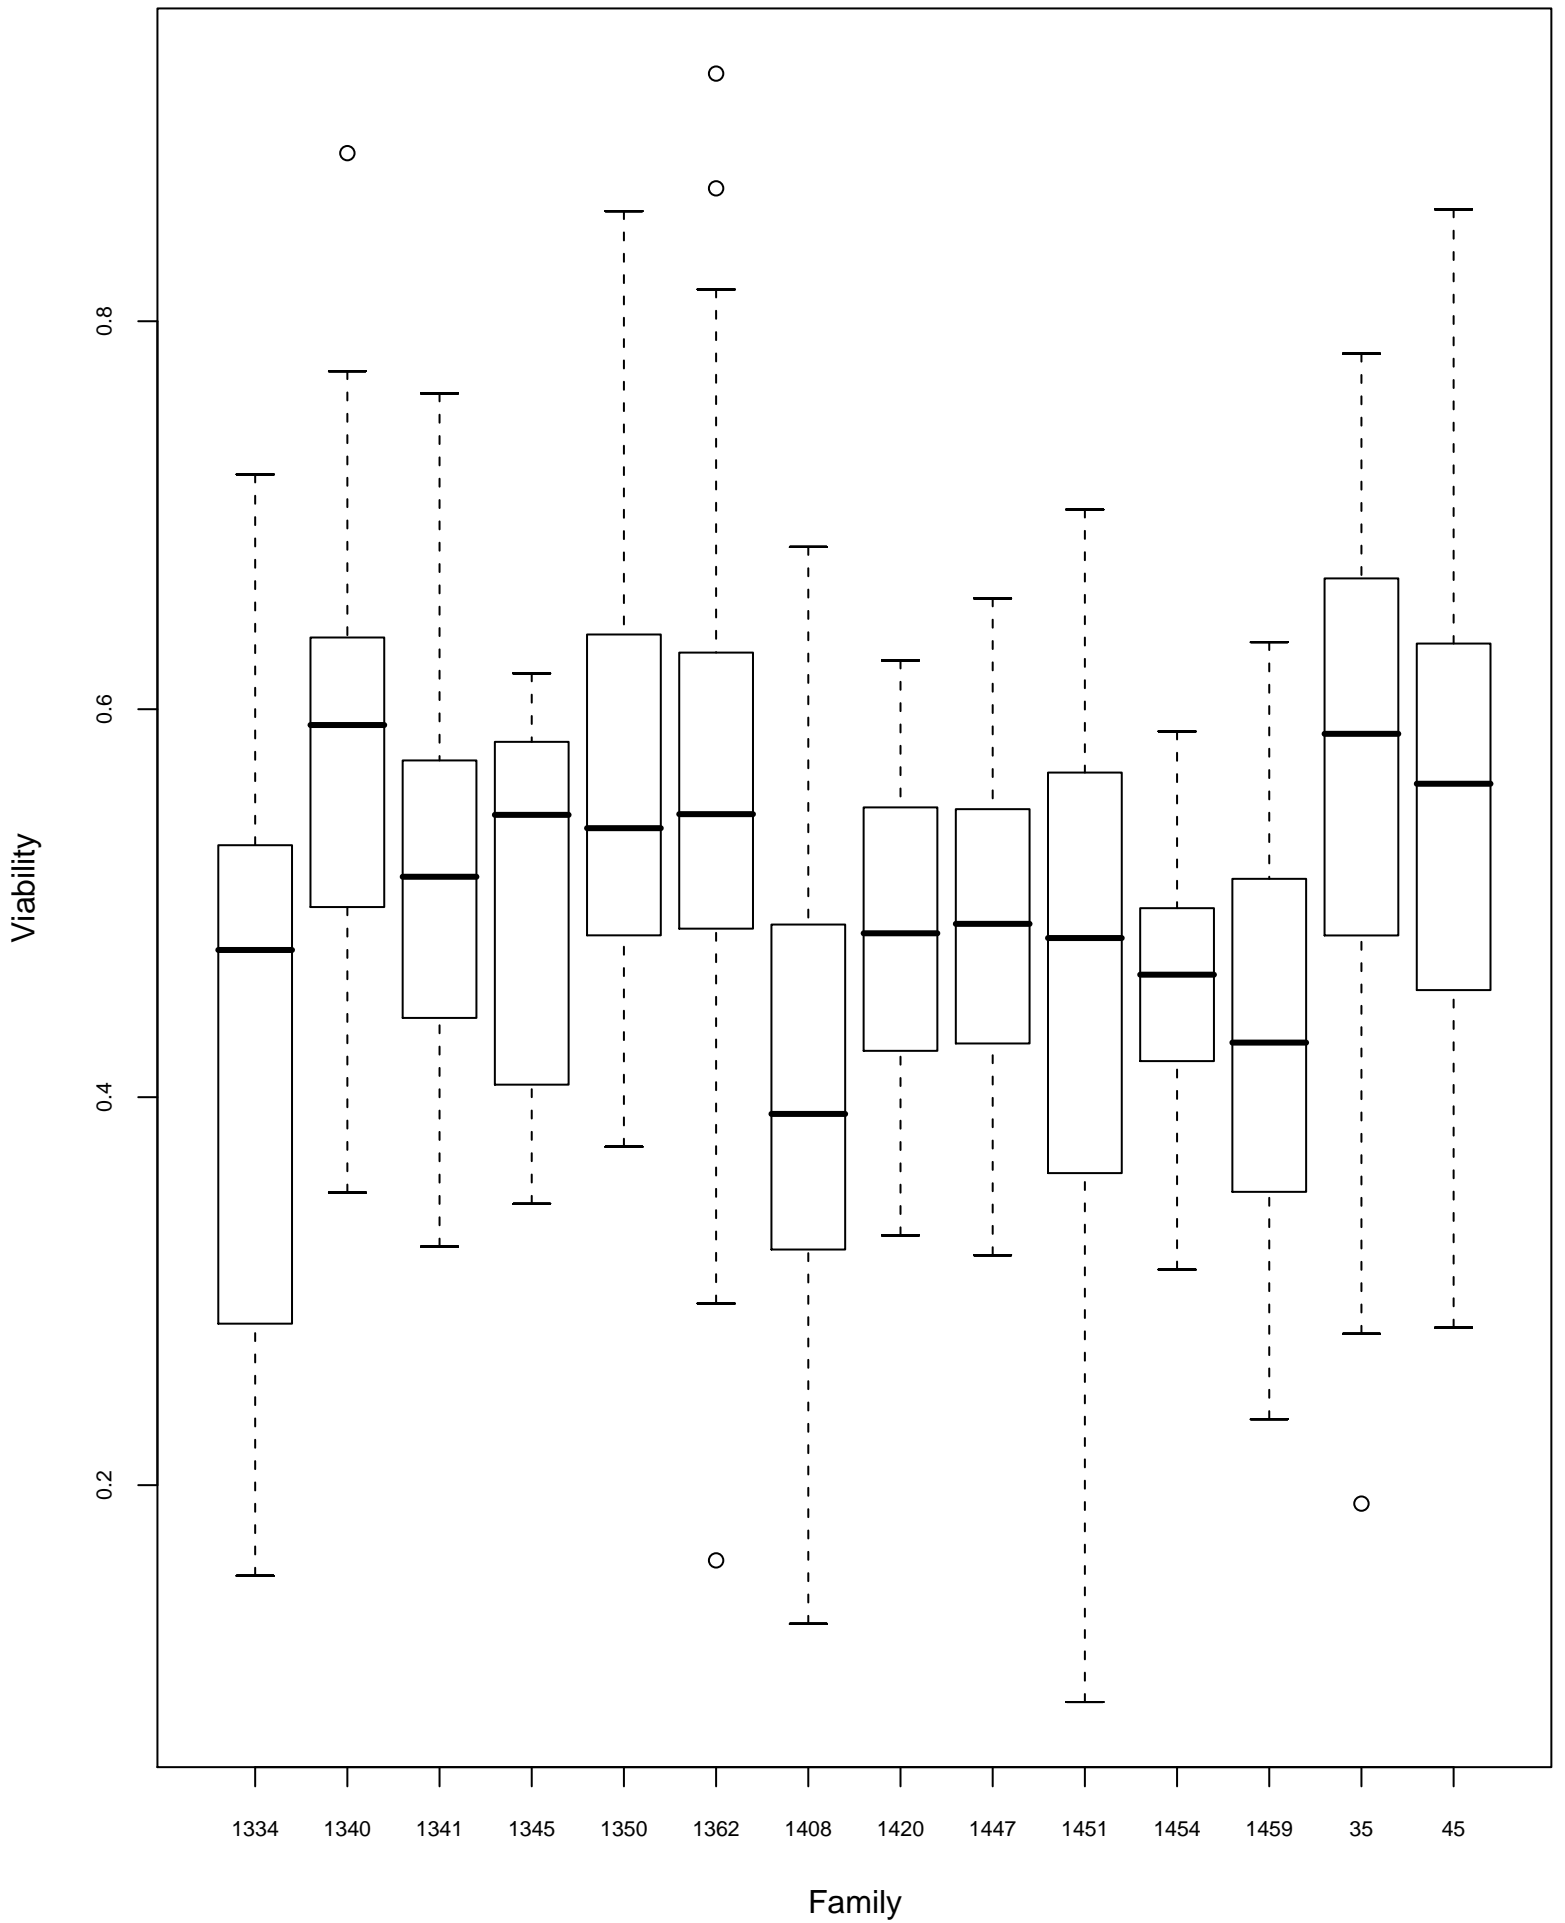

# Drug Etop, dose 0.000408 (mM)

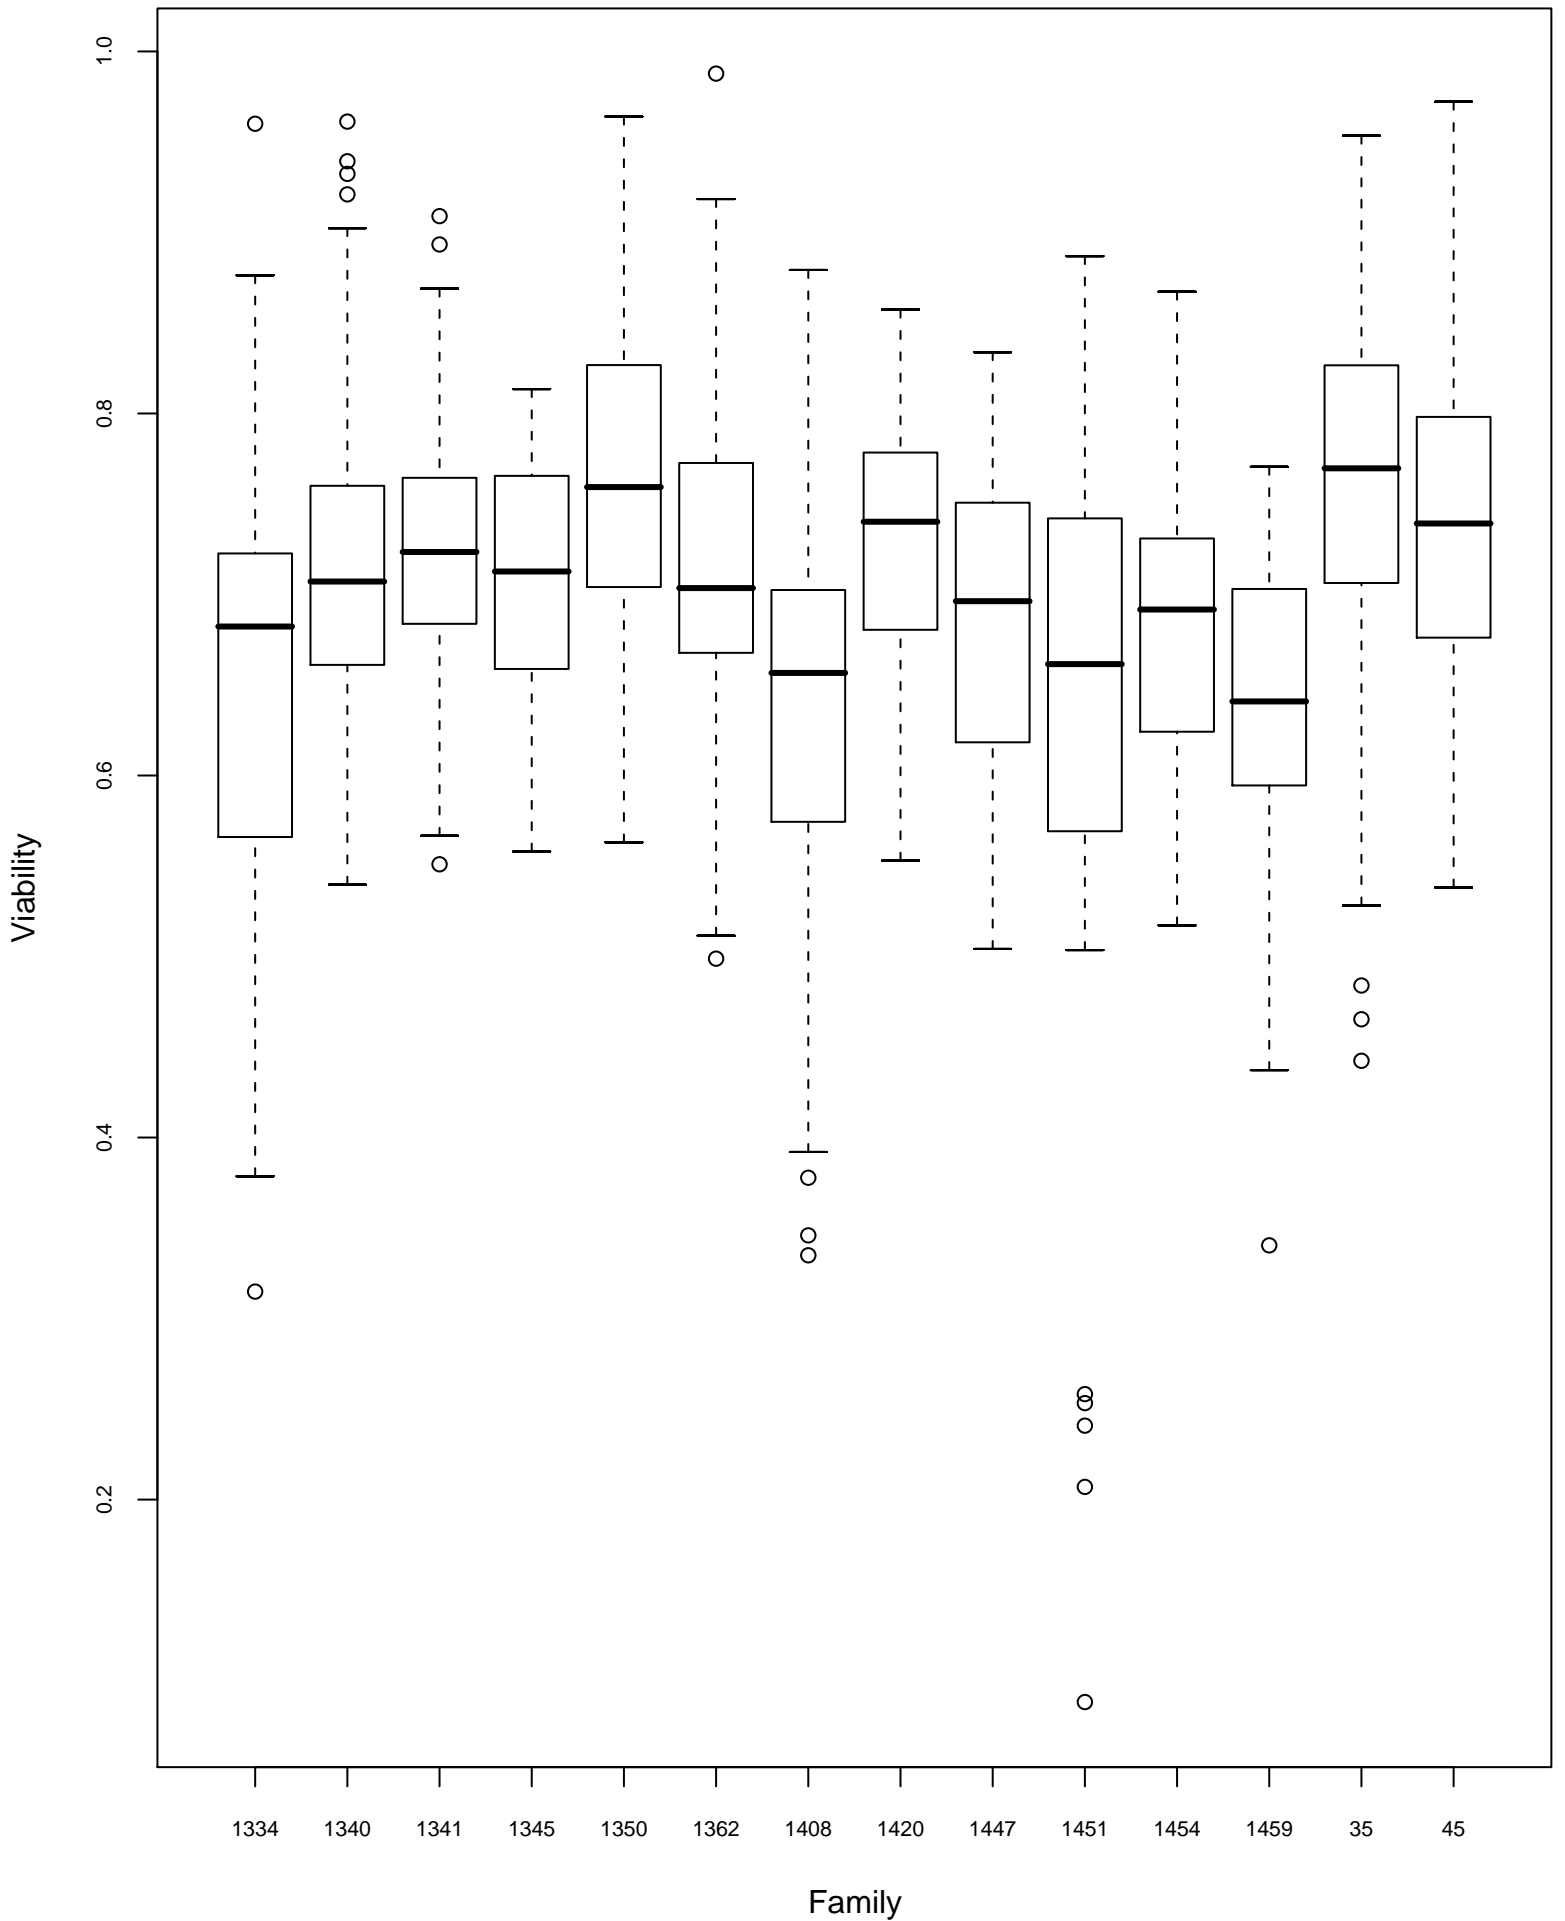

# Drug Etop, dose 0.000117 (mM)

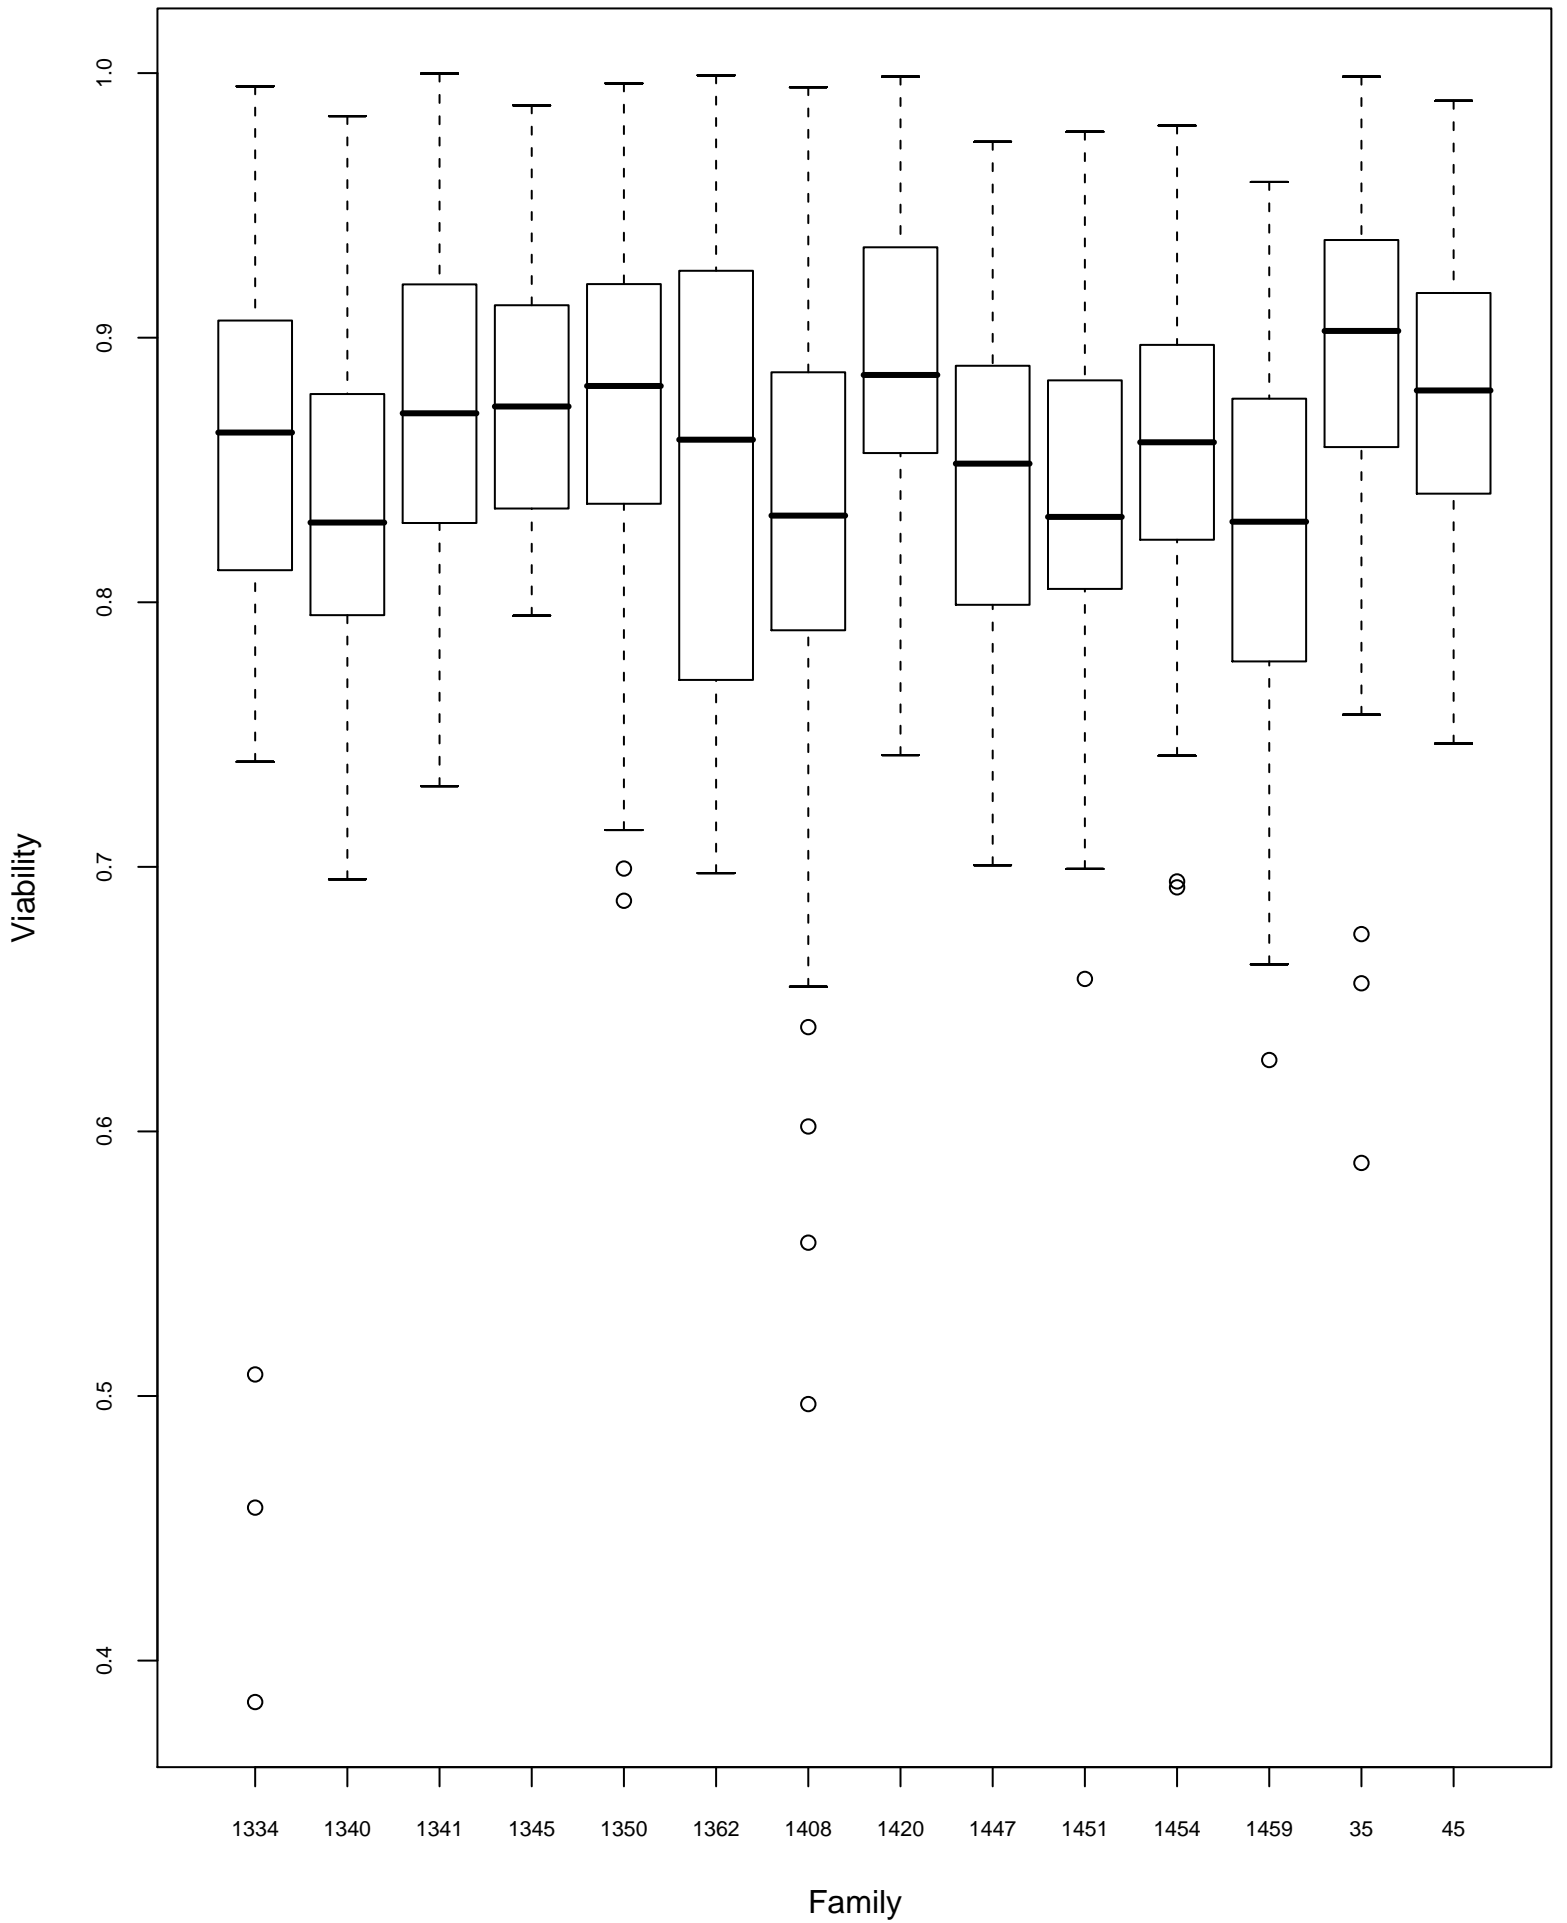

# Drug Flox, dose 0.1 (mM)

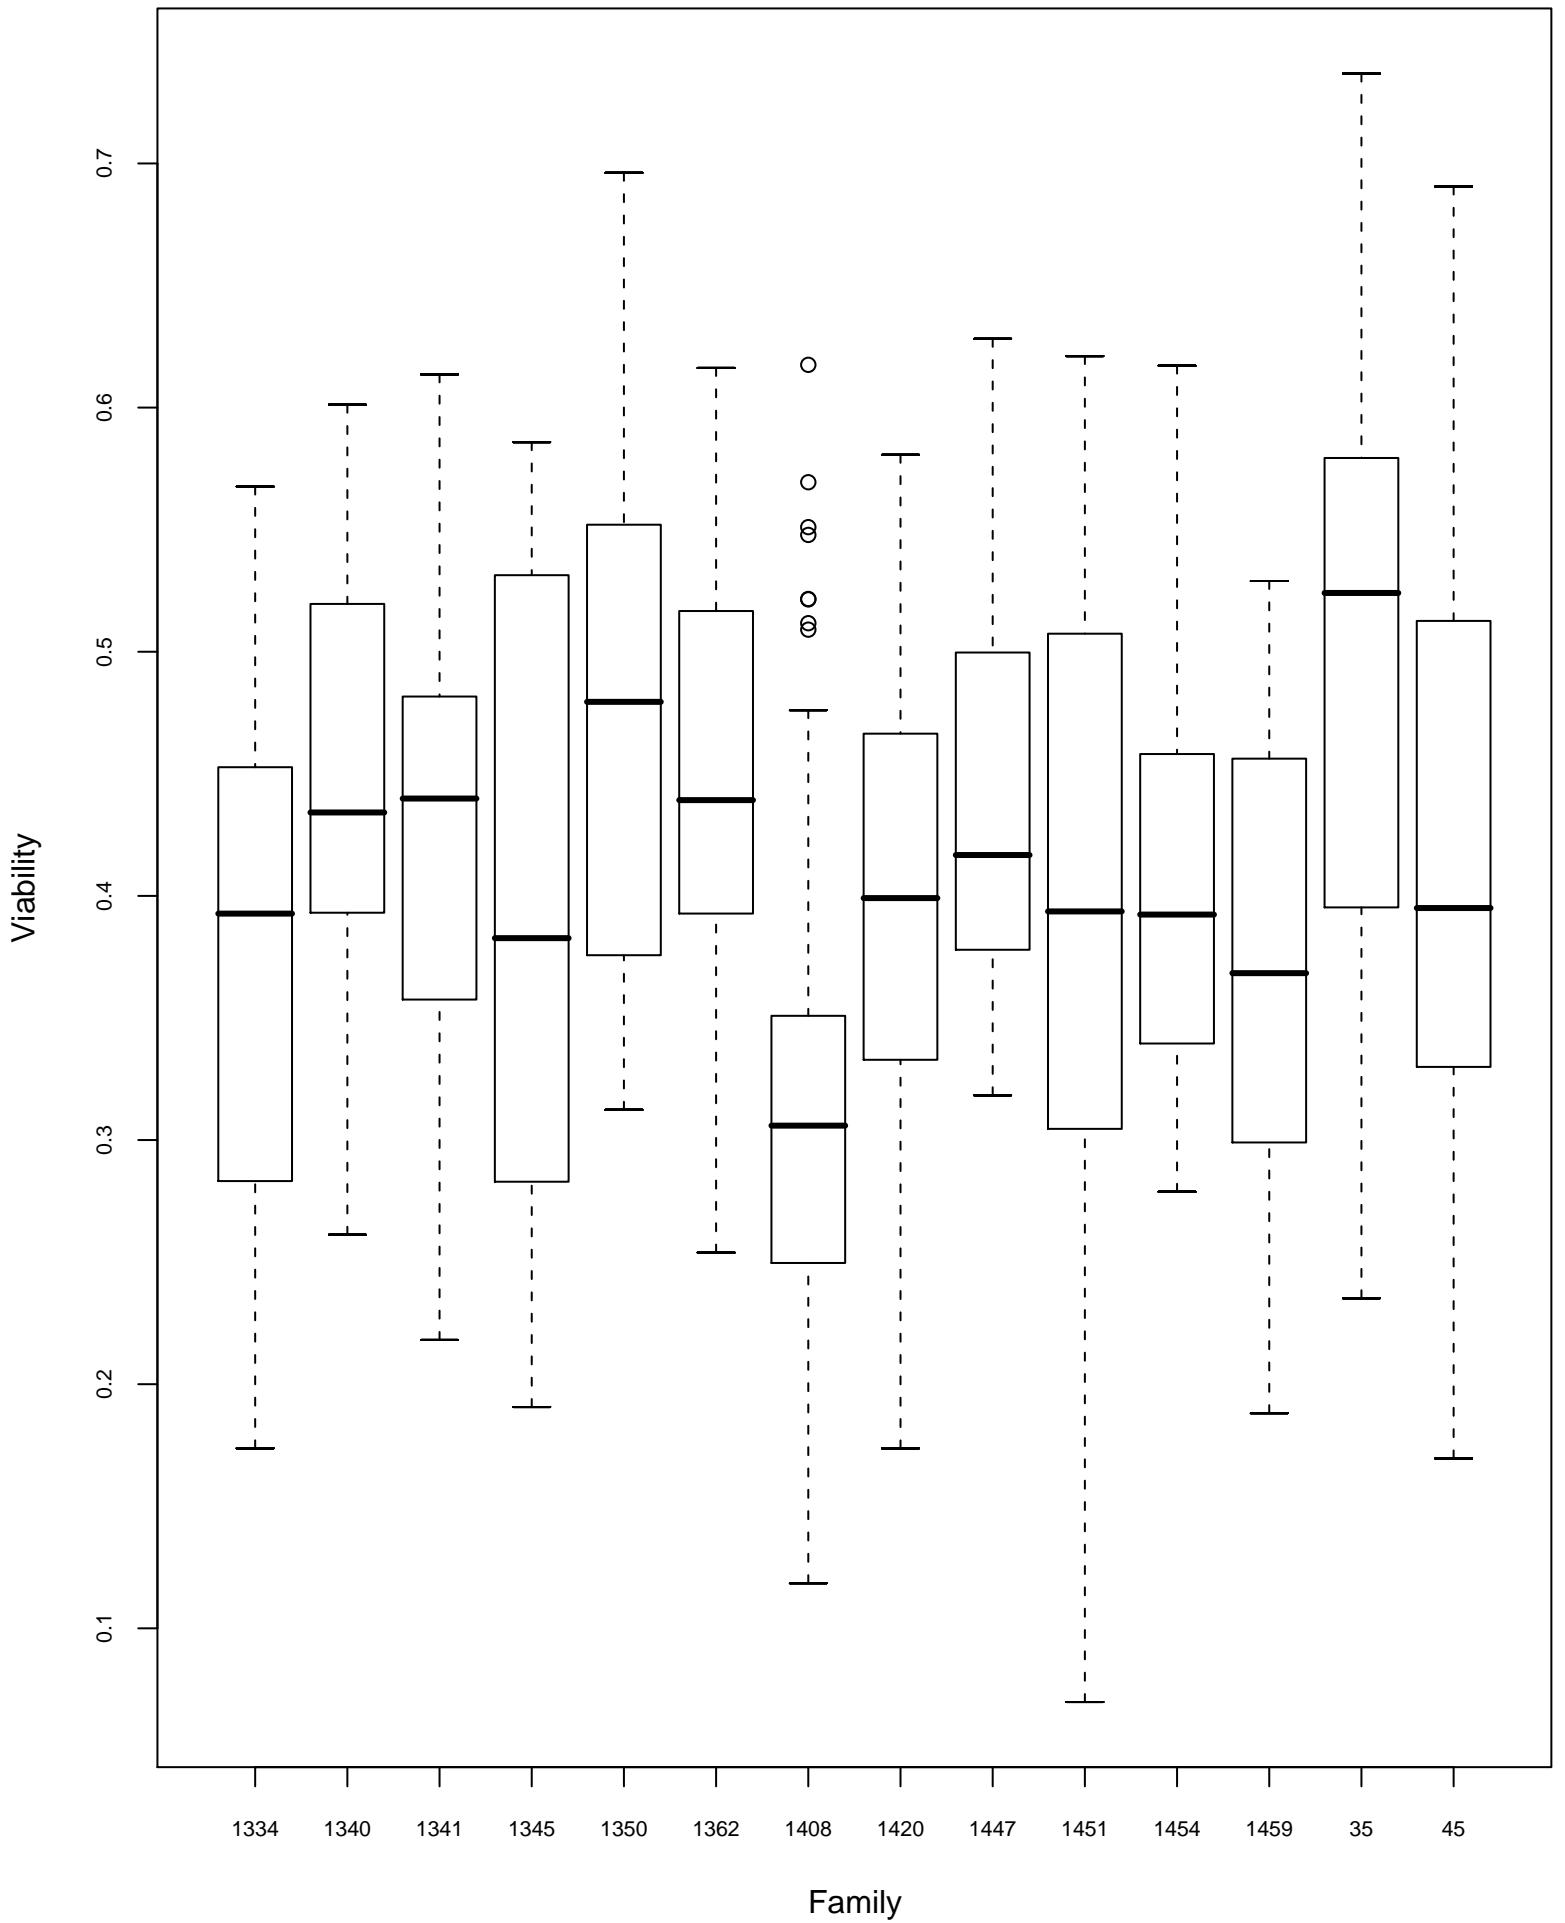

# Drug Flox, dose 0.0285714 (mM)

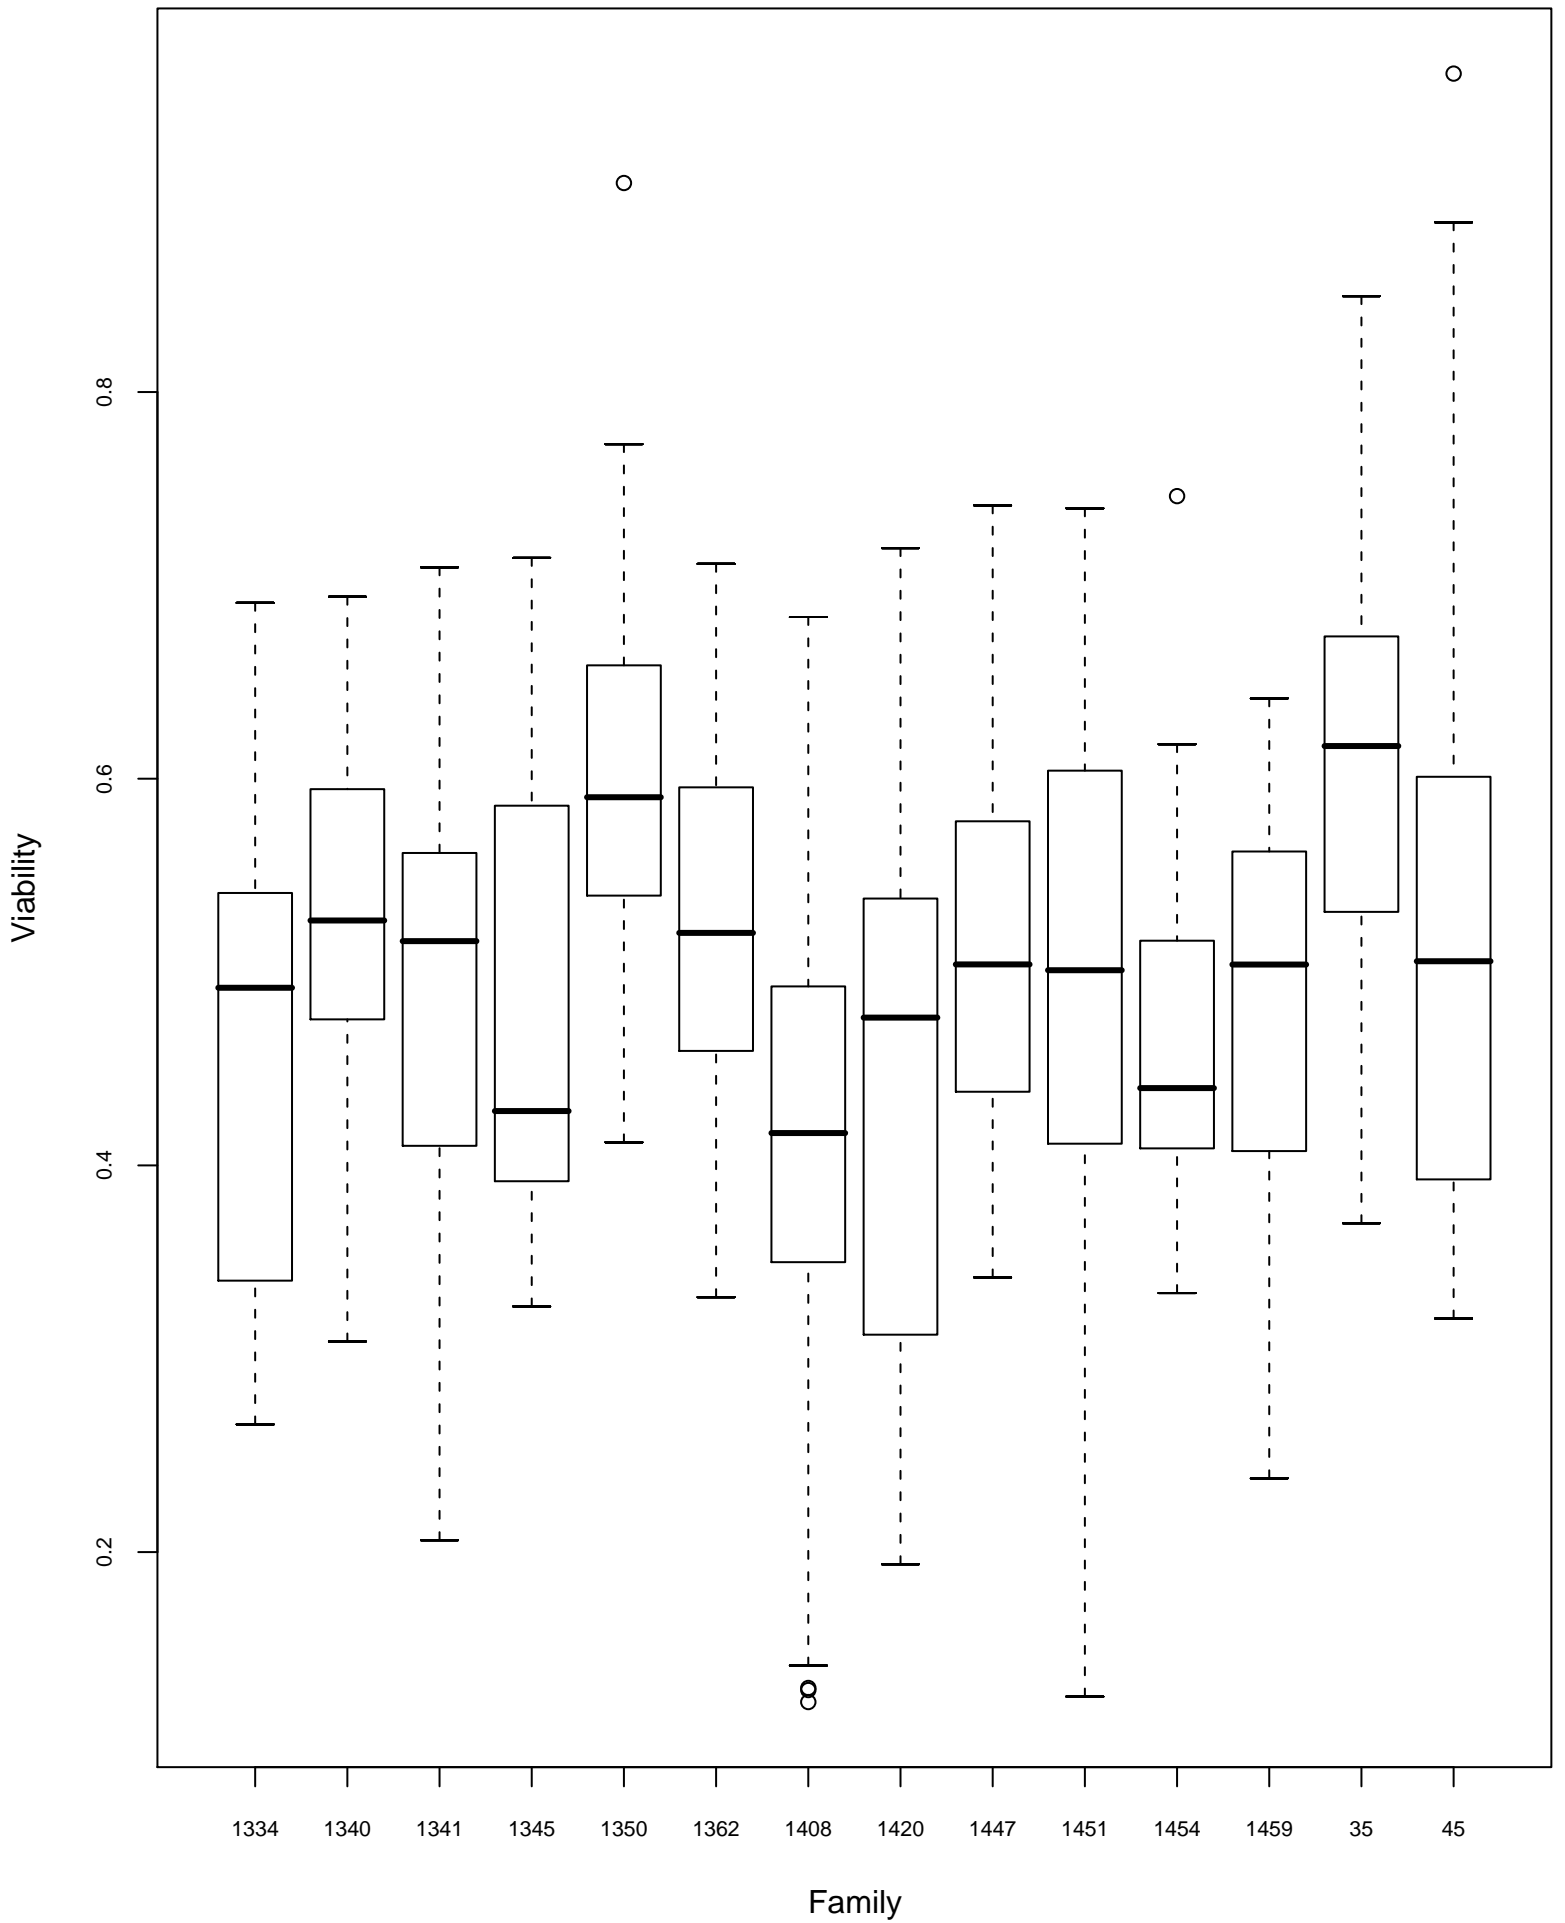

# Drug Flox, dose 0.0081633 (mM)

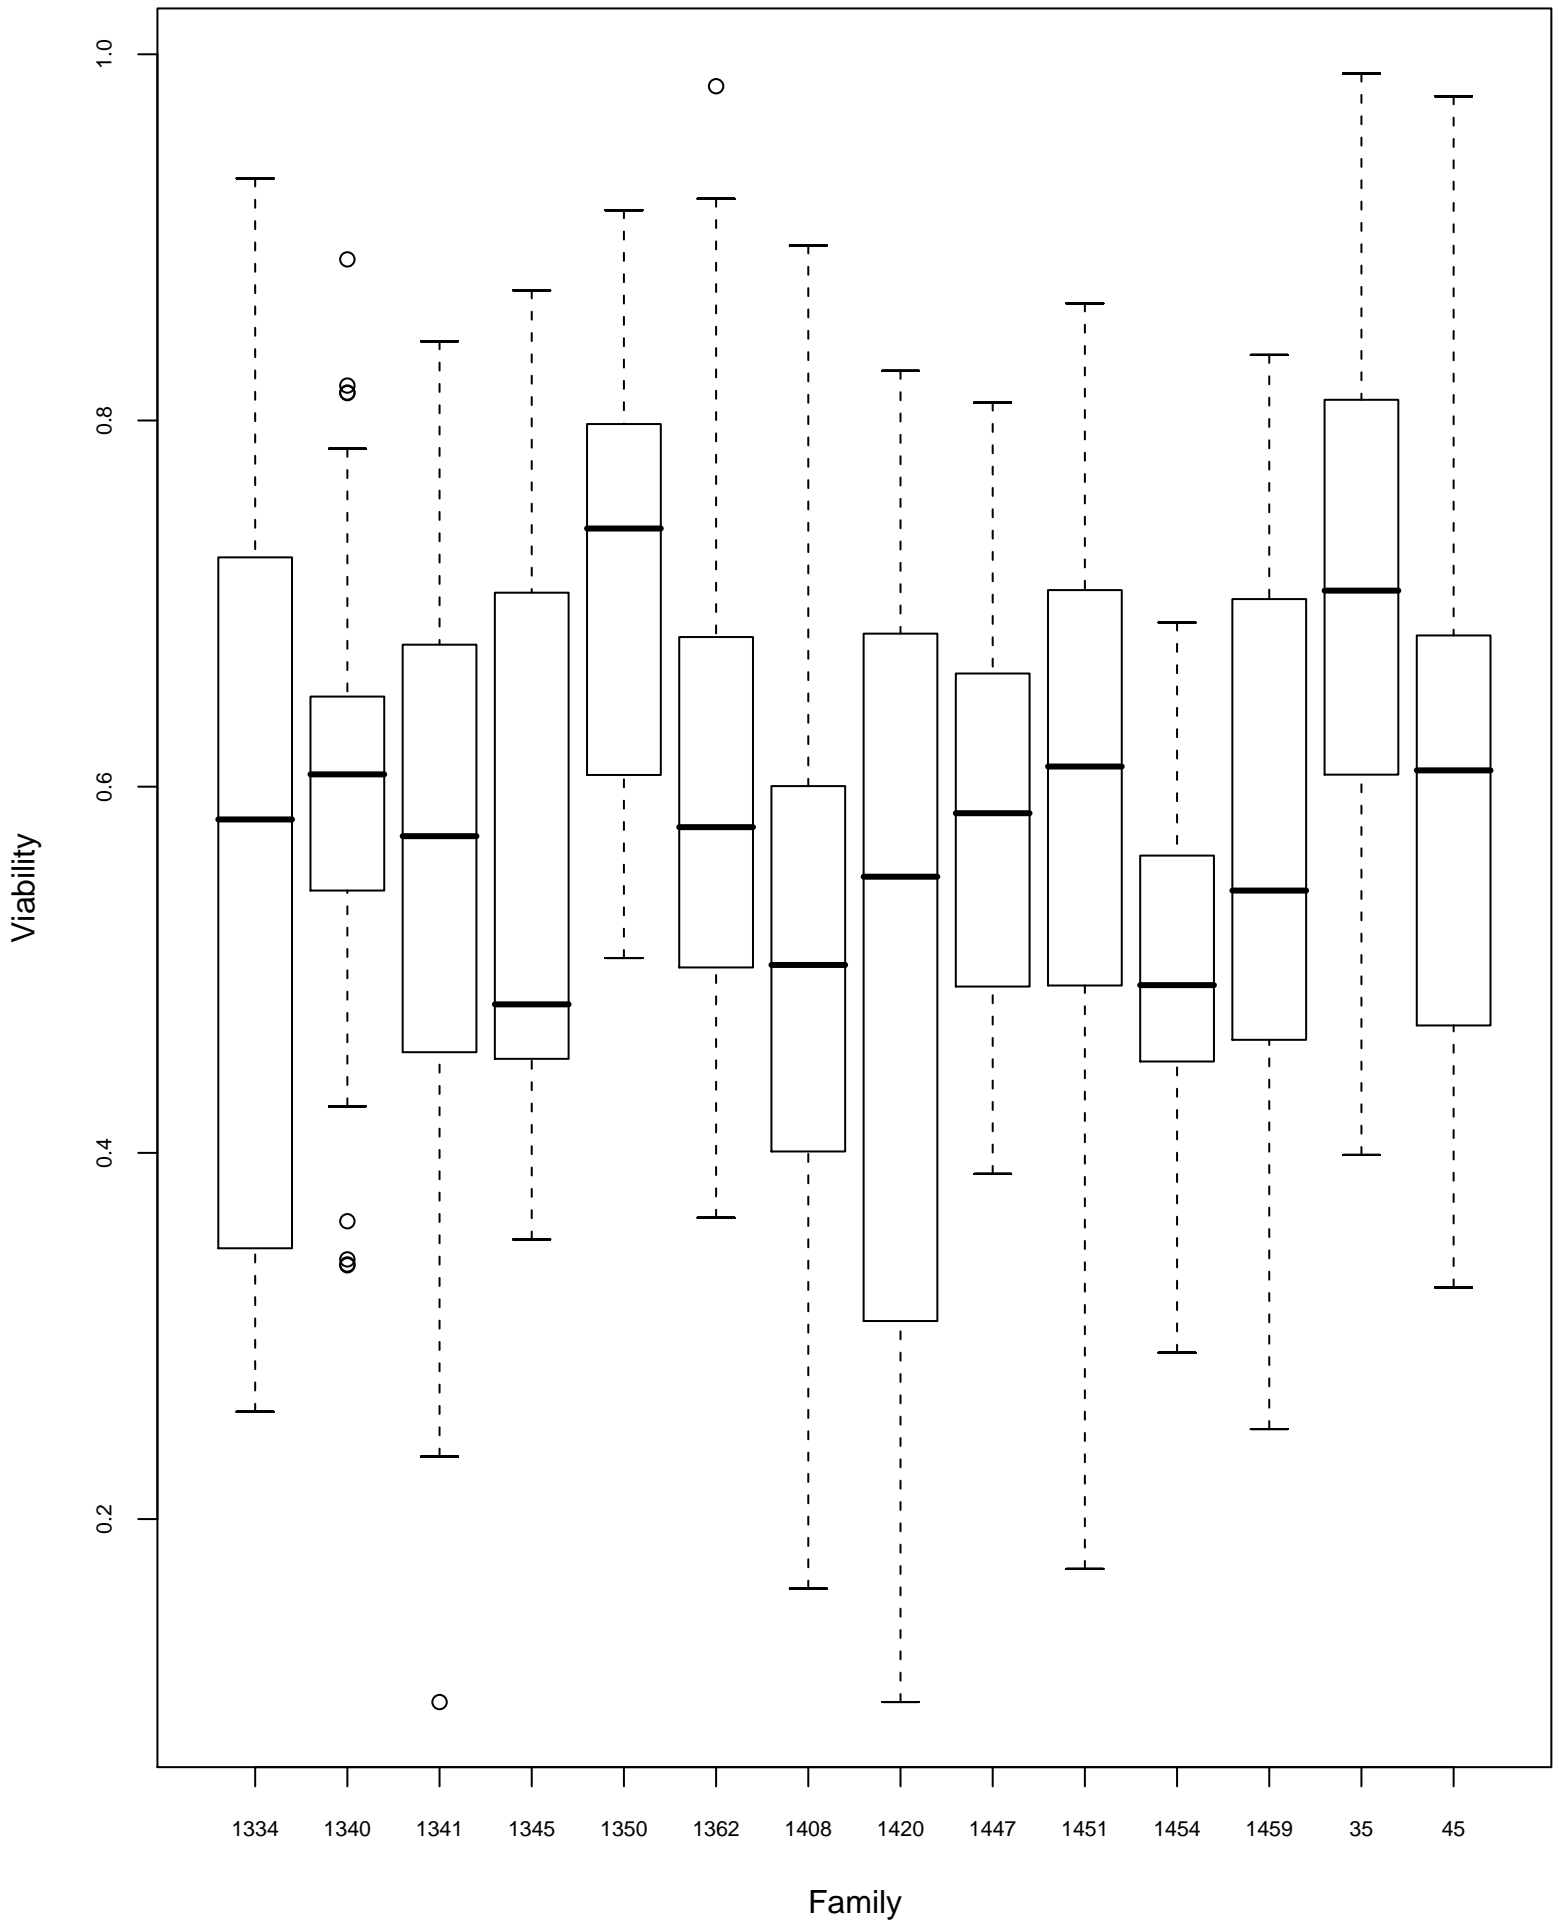

# Drug Flox, dose 0.0023324 (mM)

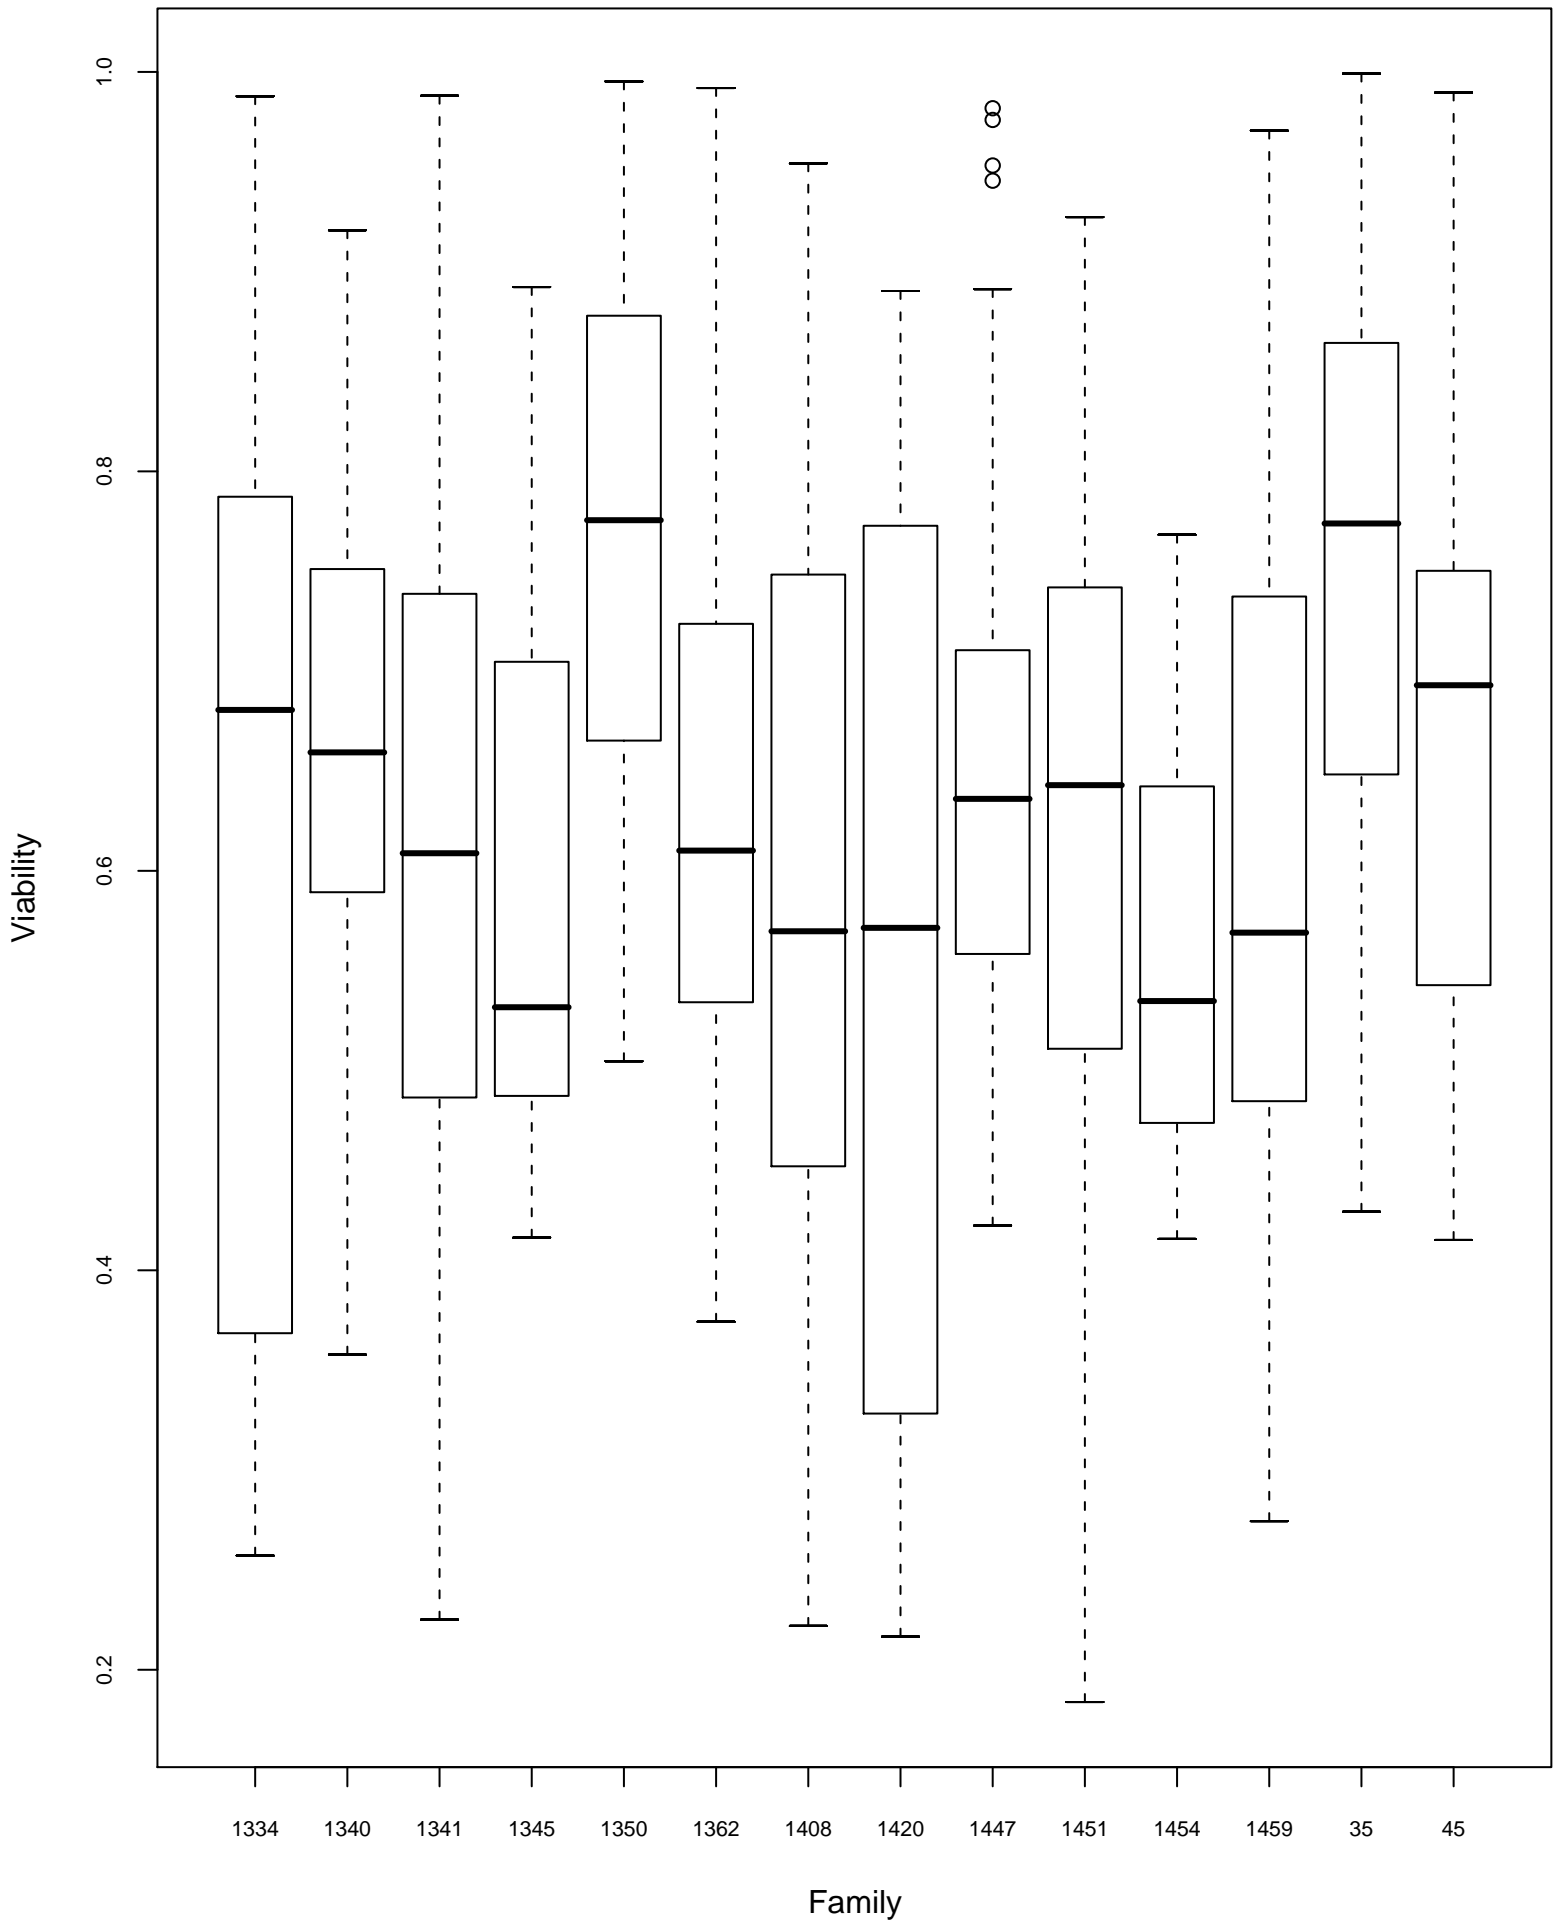



# Drug Flud, dose 0.1 (mM)

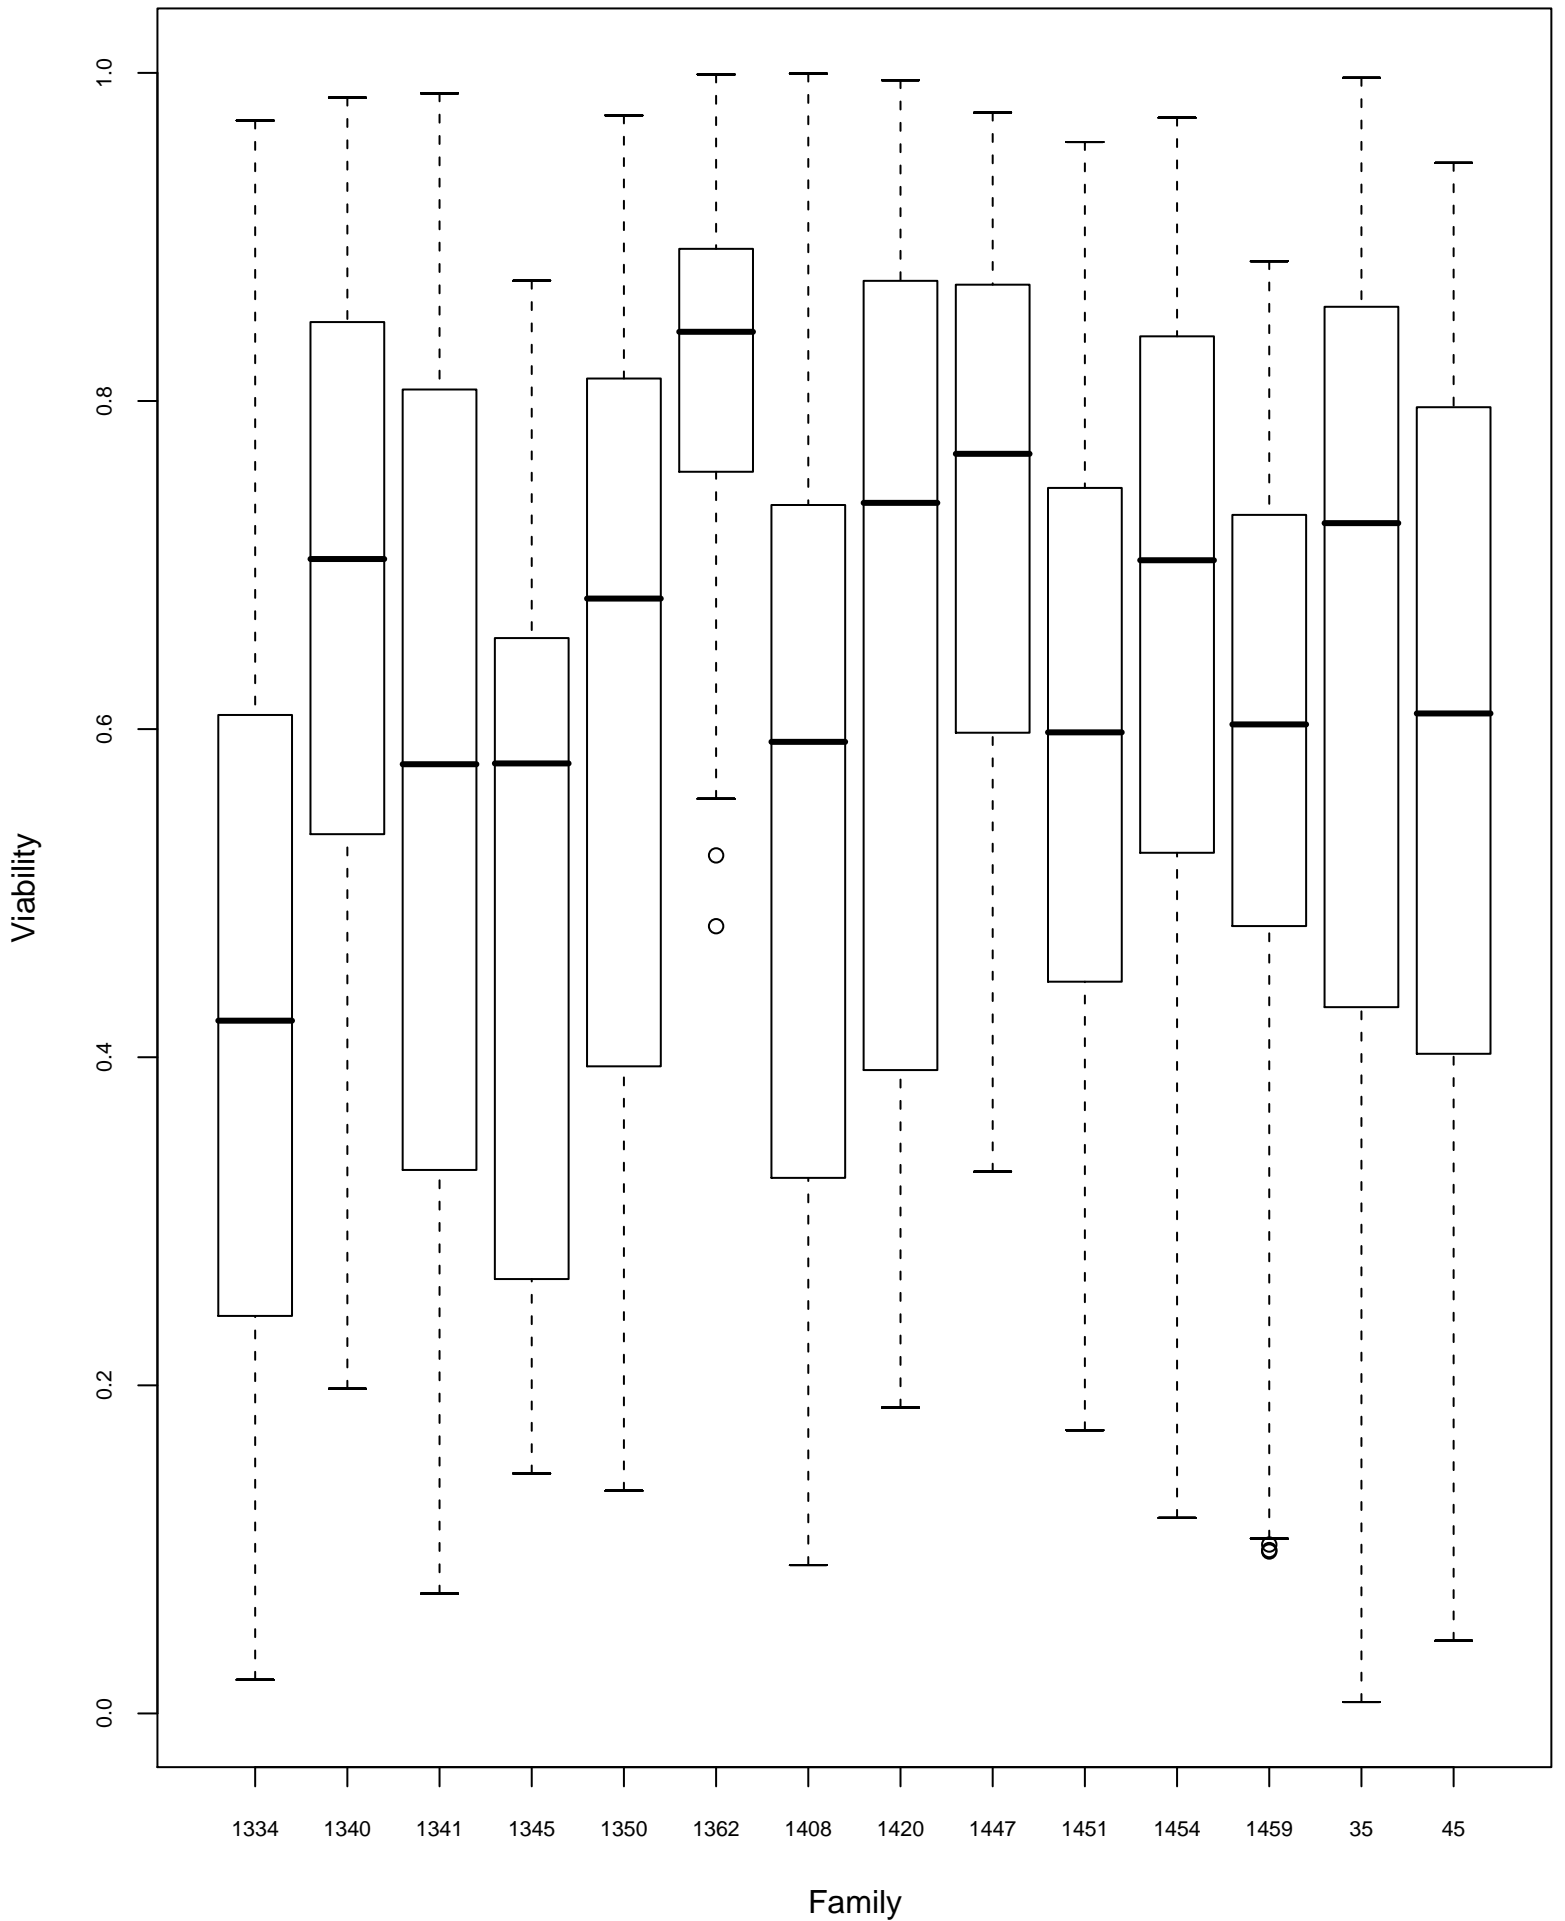

# Drug Flud, dose 0.04 (mM)

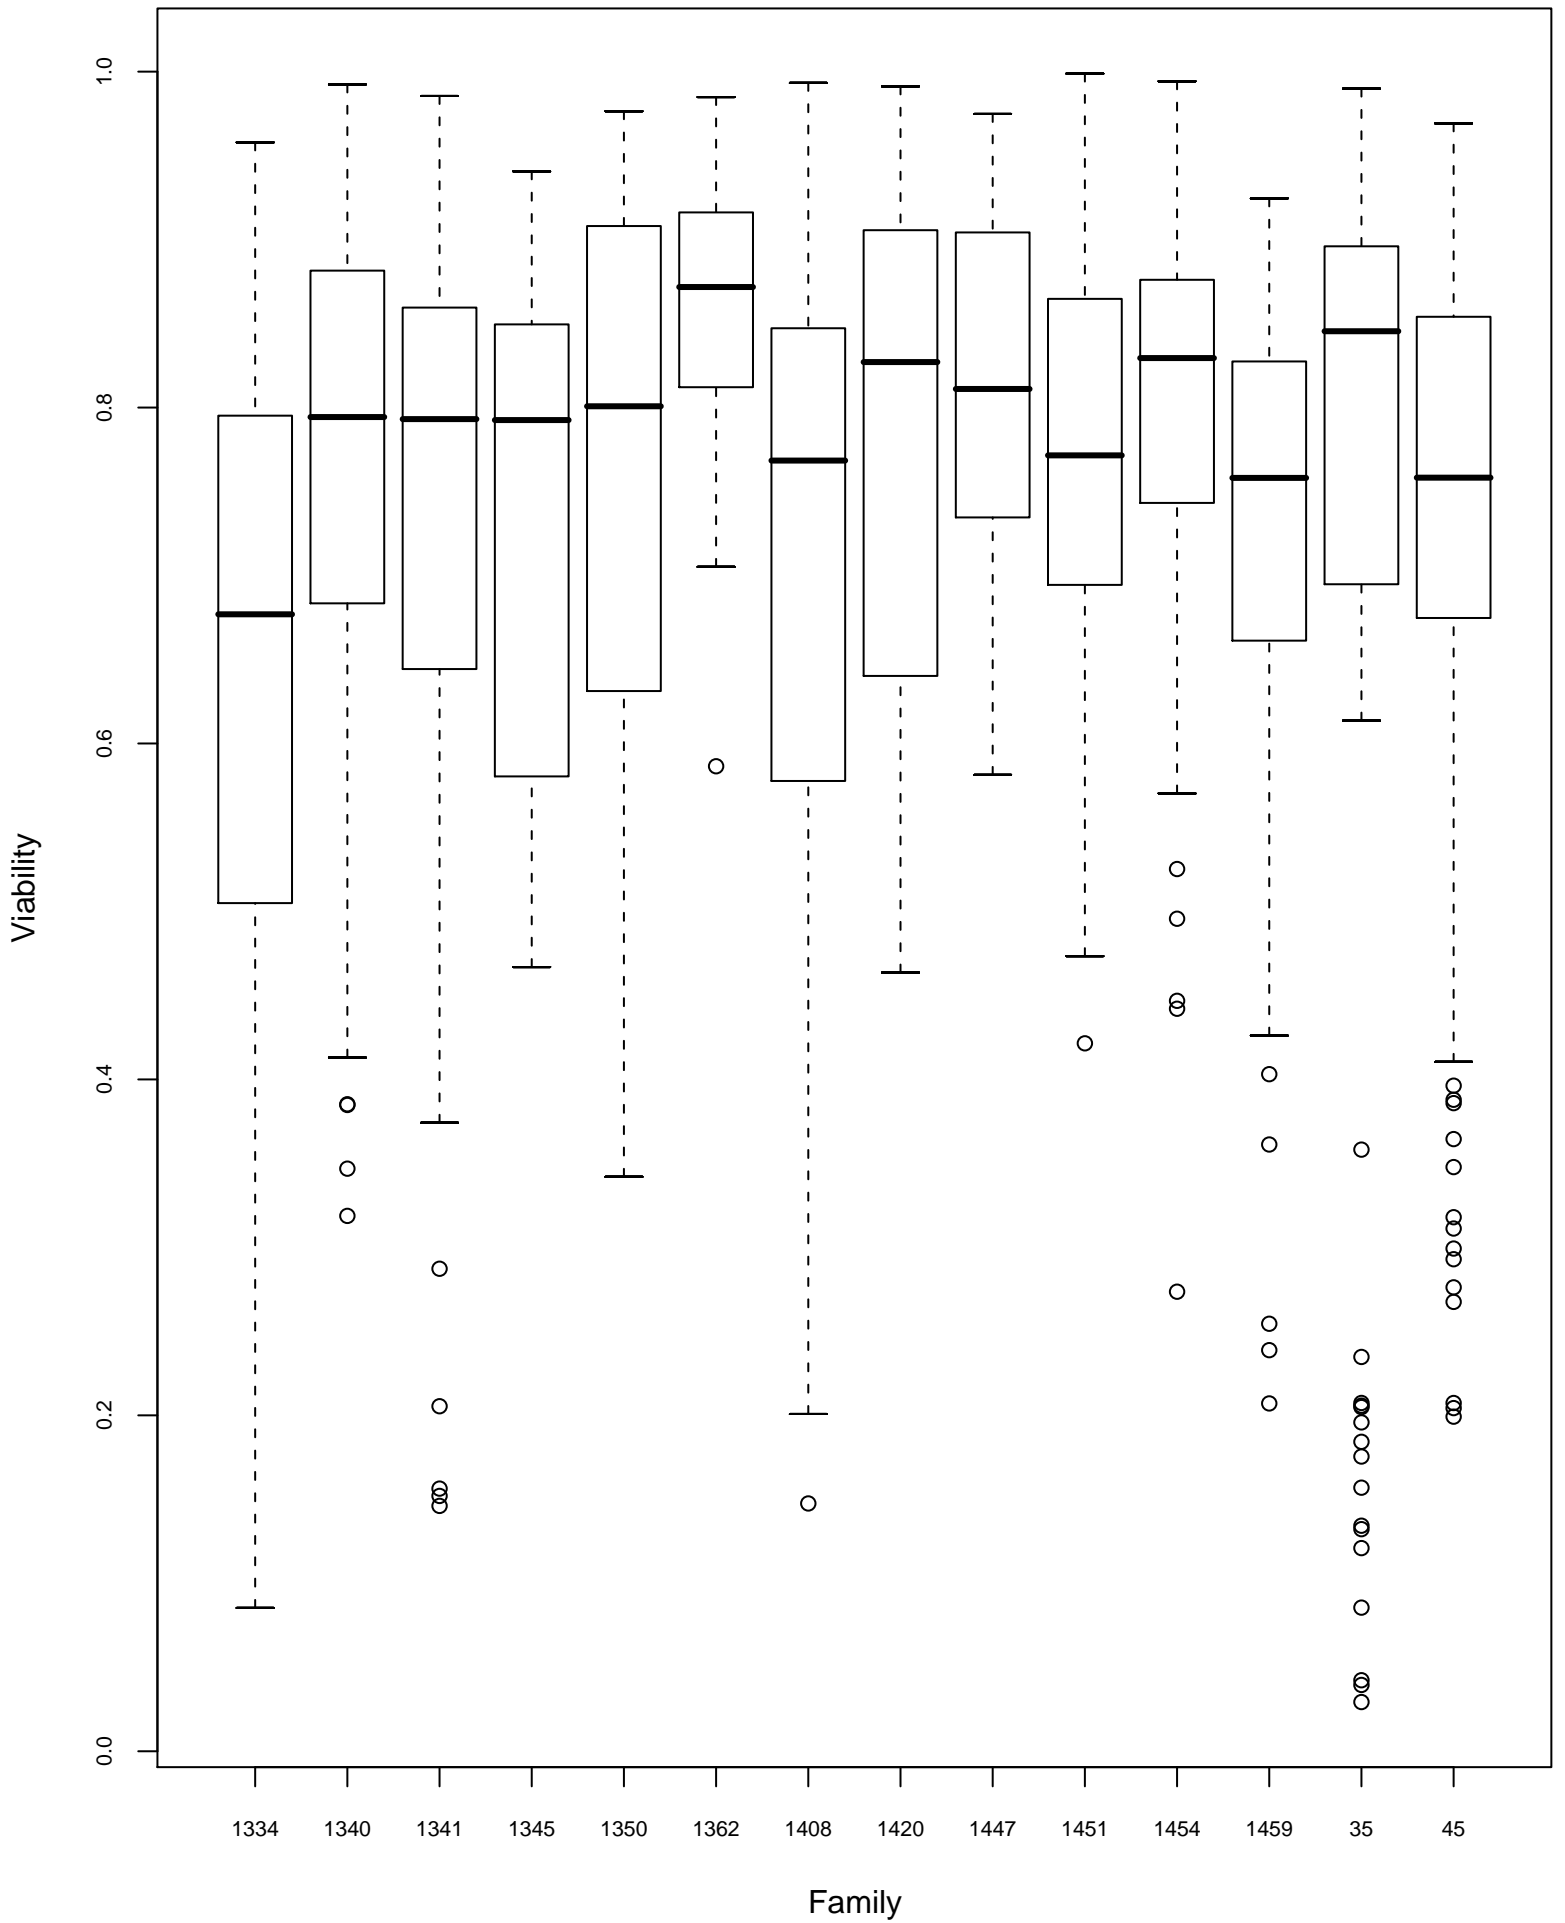

# Drug Flud, dose 0.016 (mM)

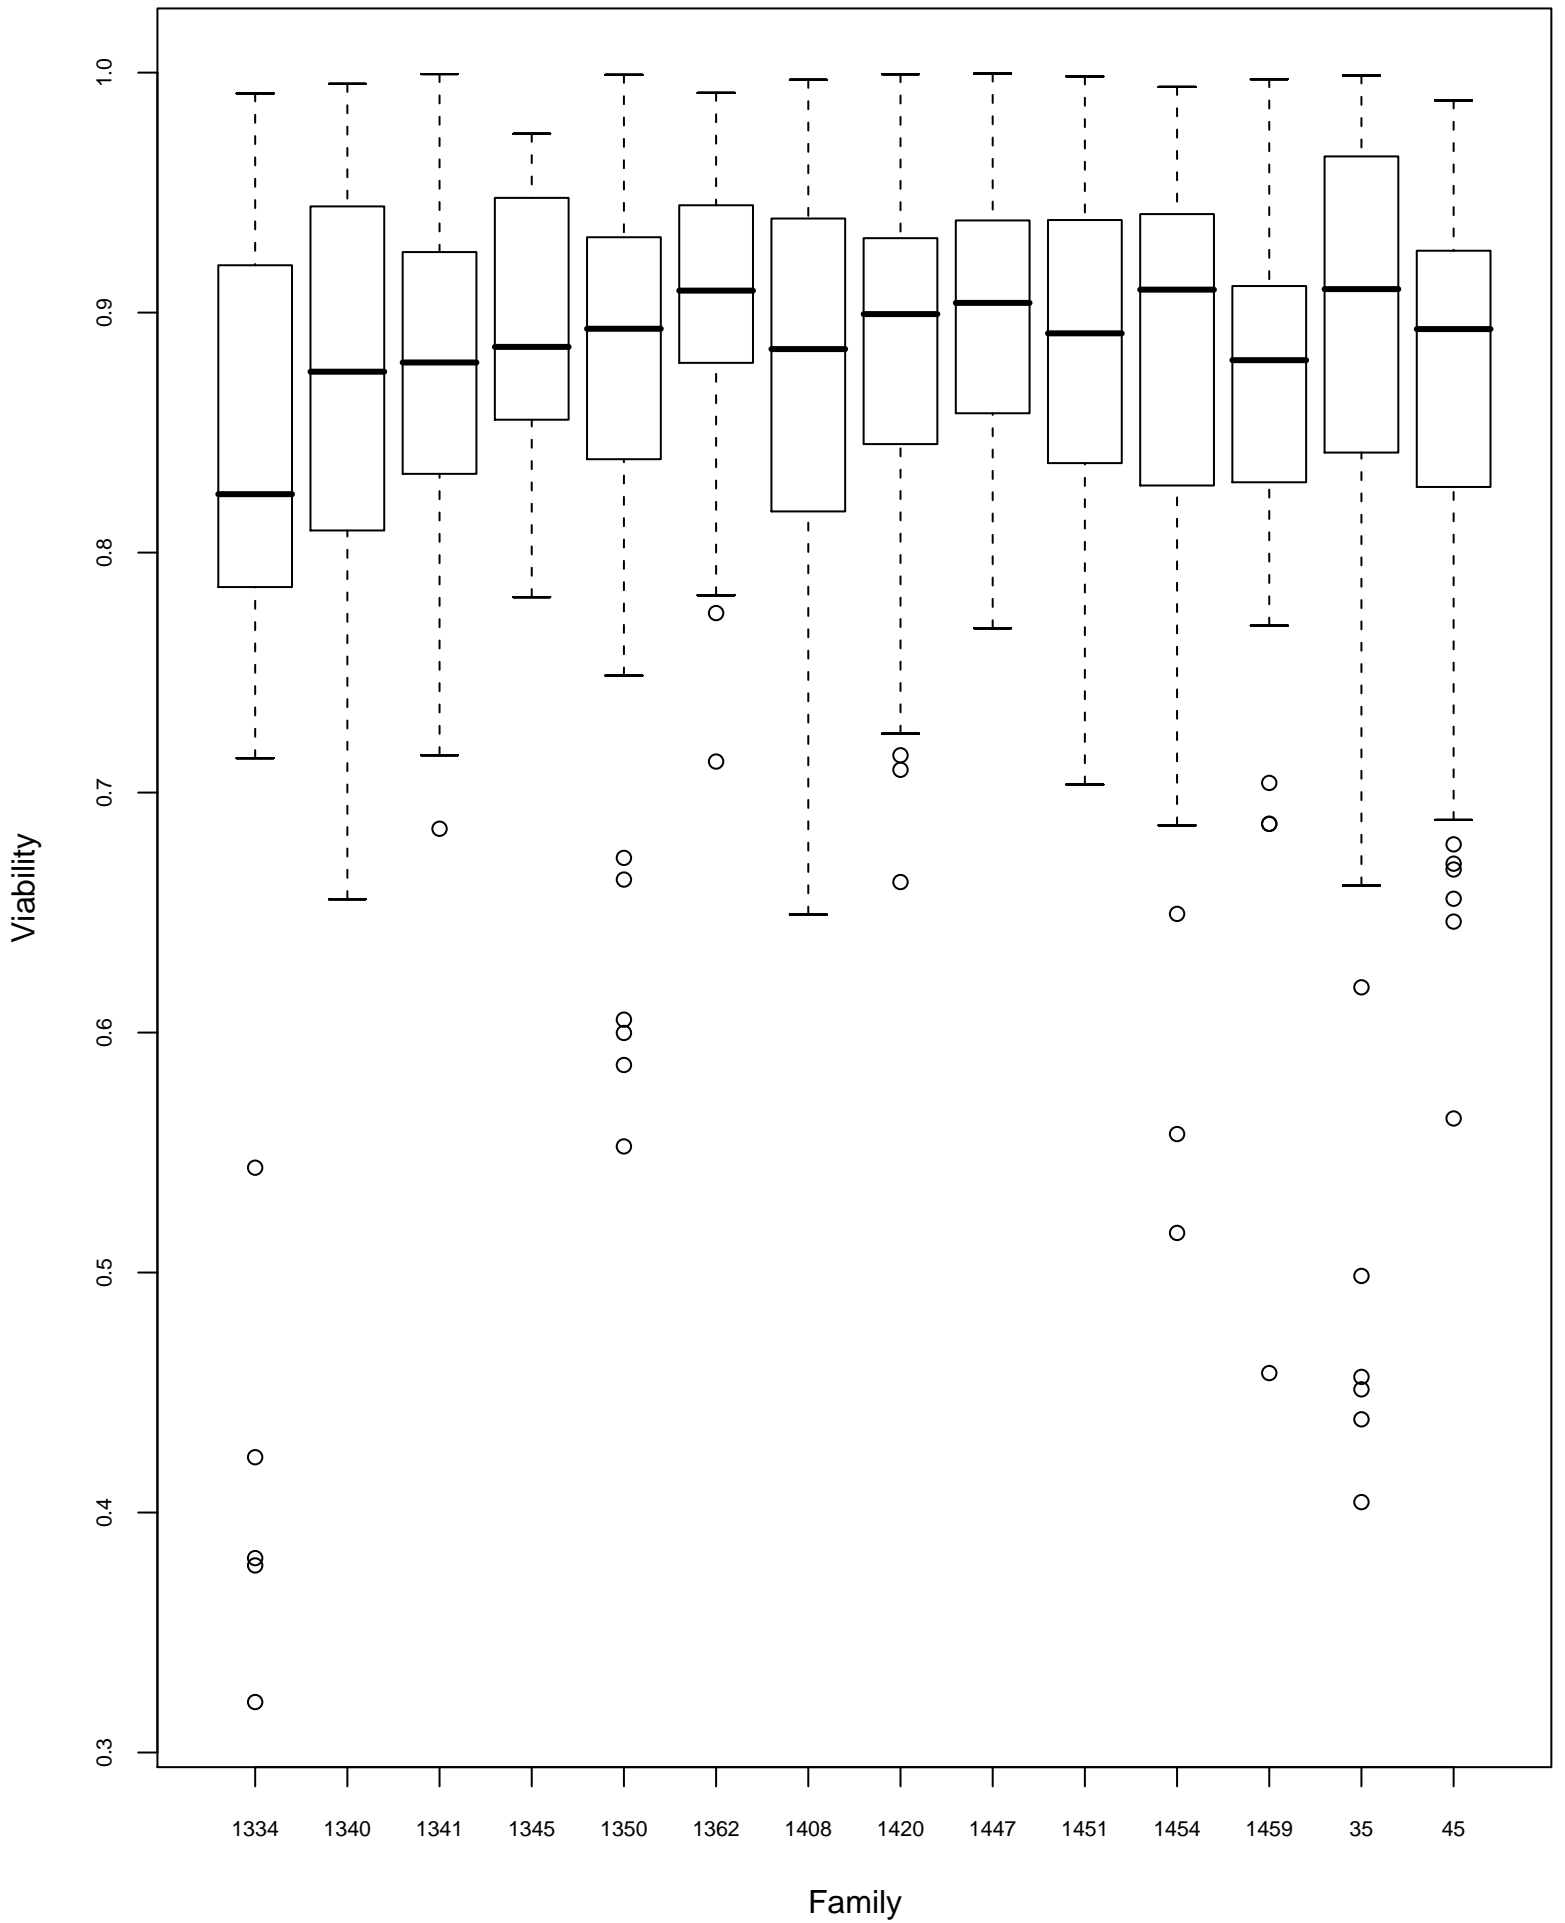

# Drug Flud, dose 0.0064 (mM)

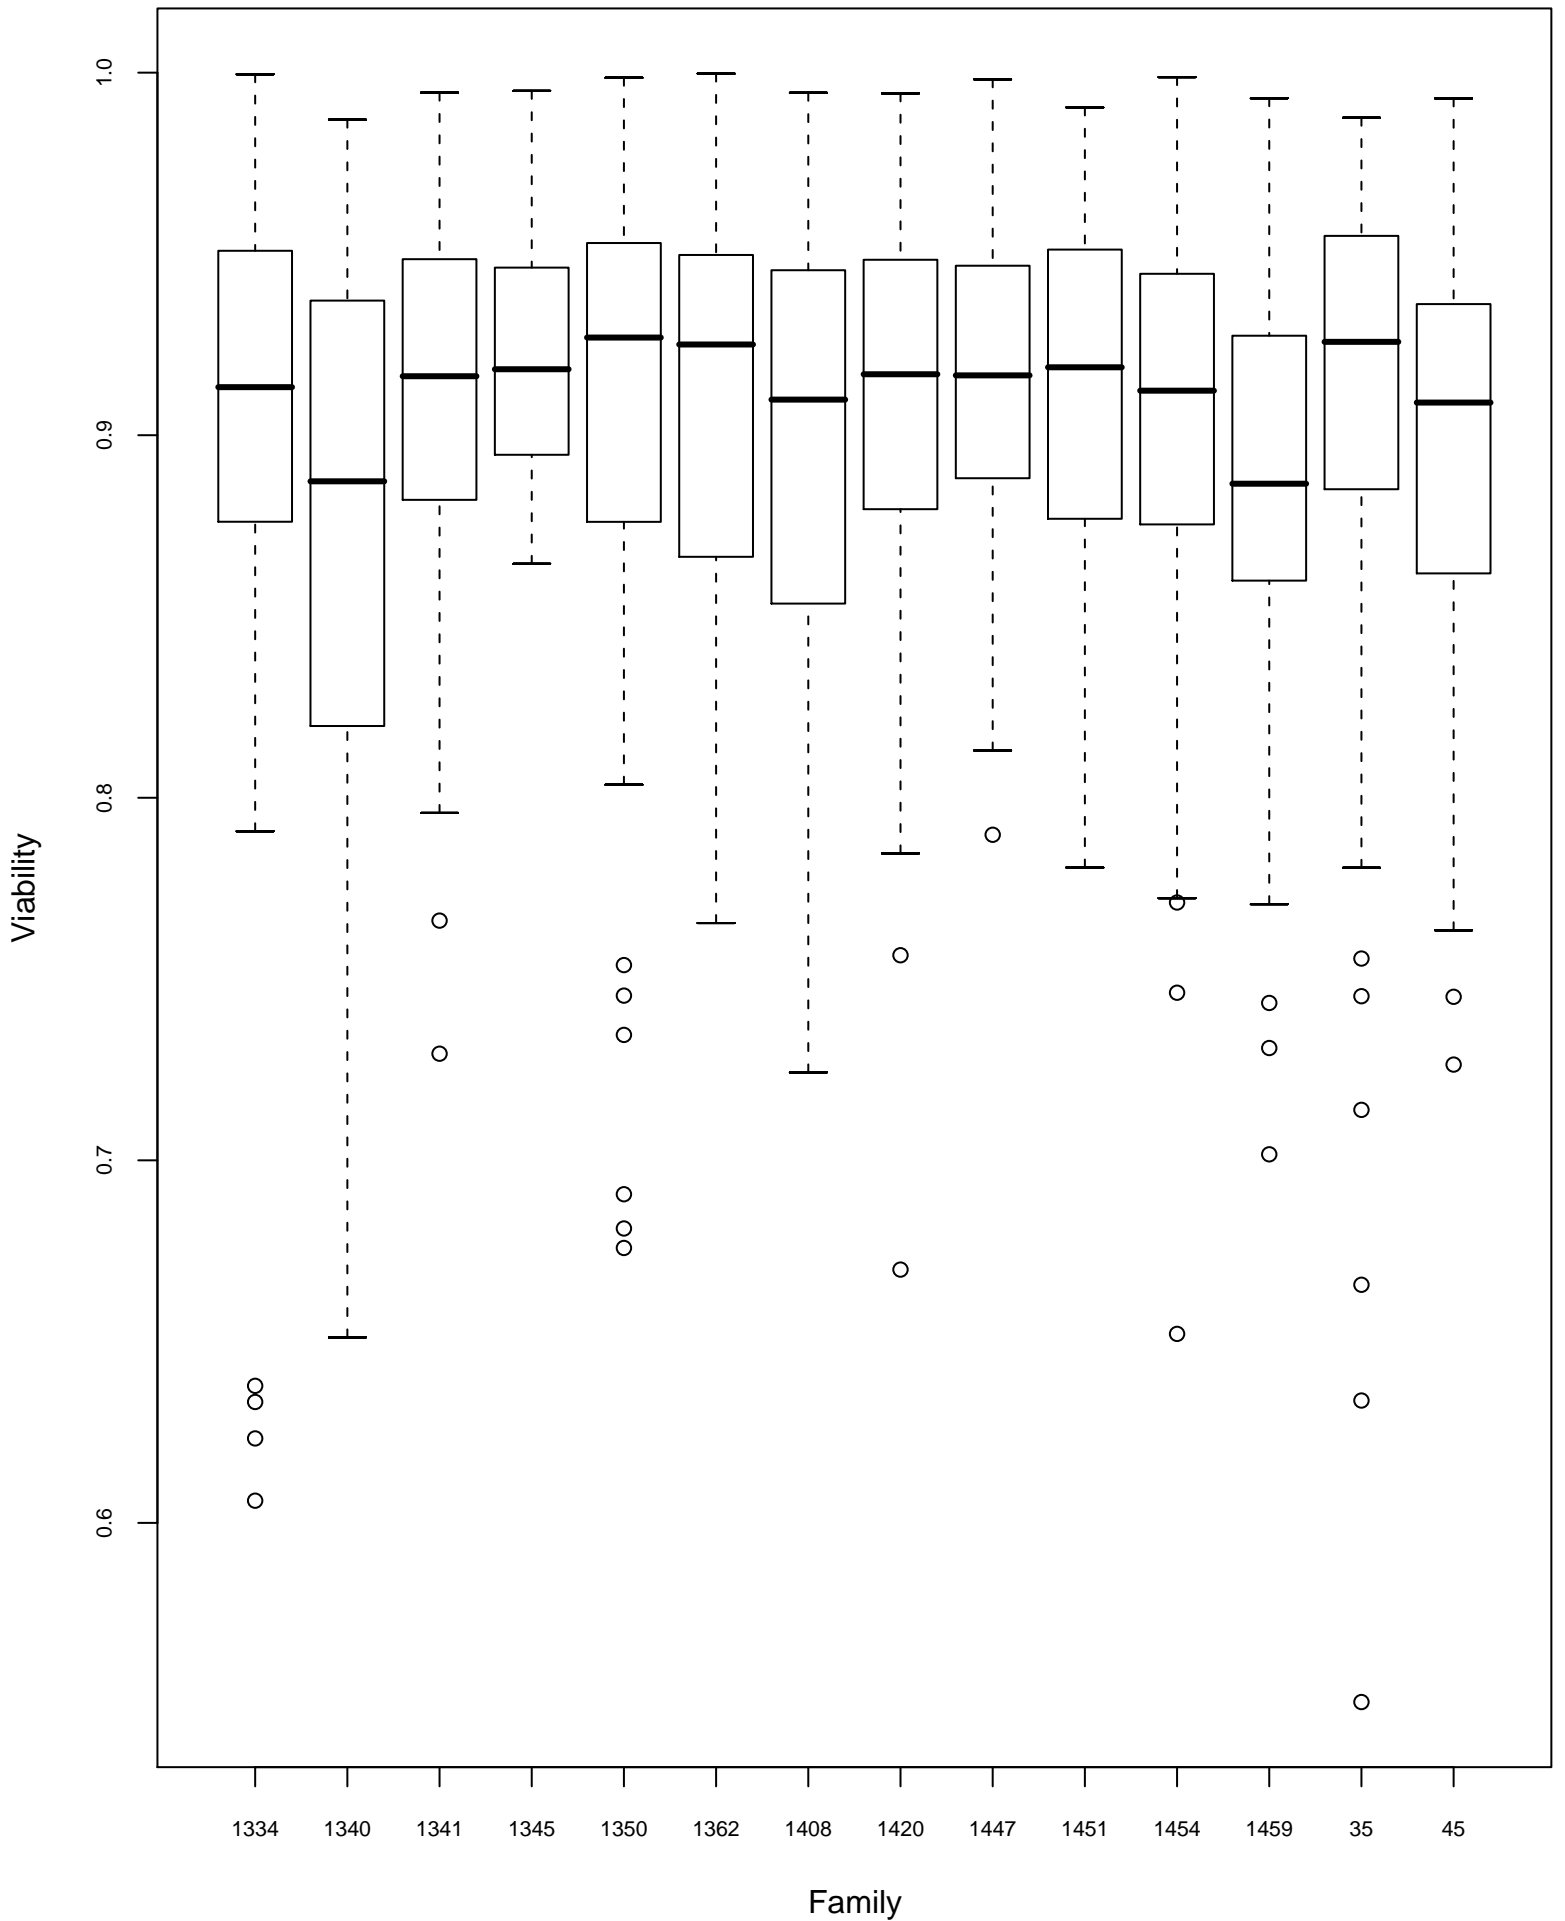

# Drug Gem, dose 2e-05 (mM)

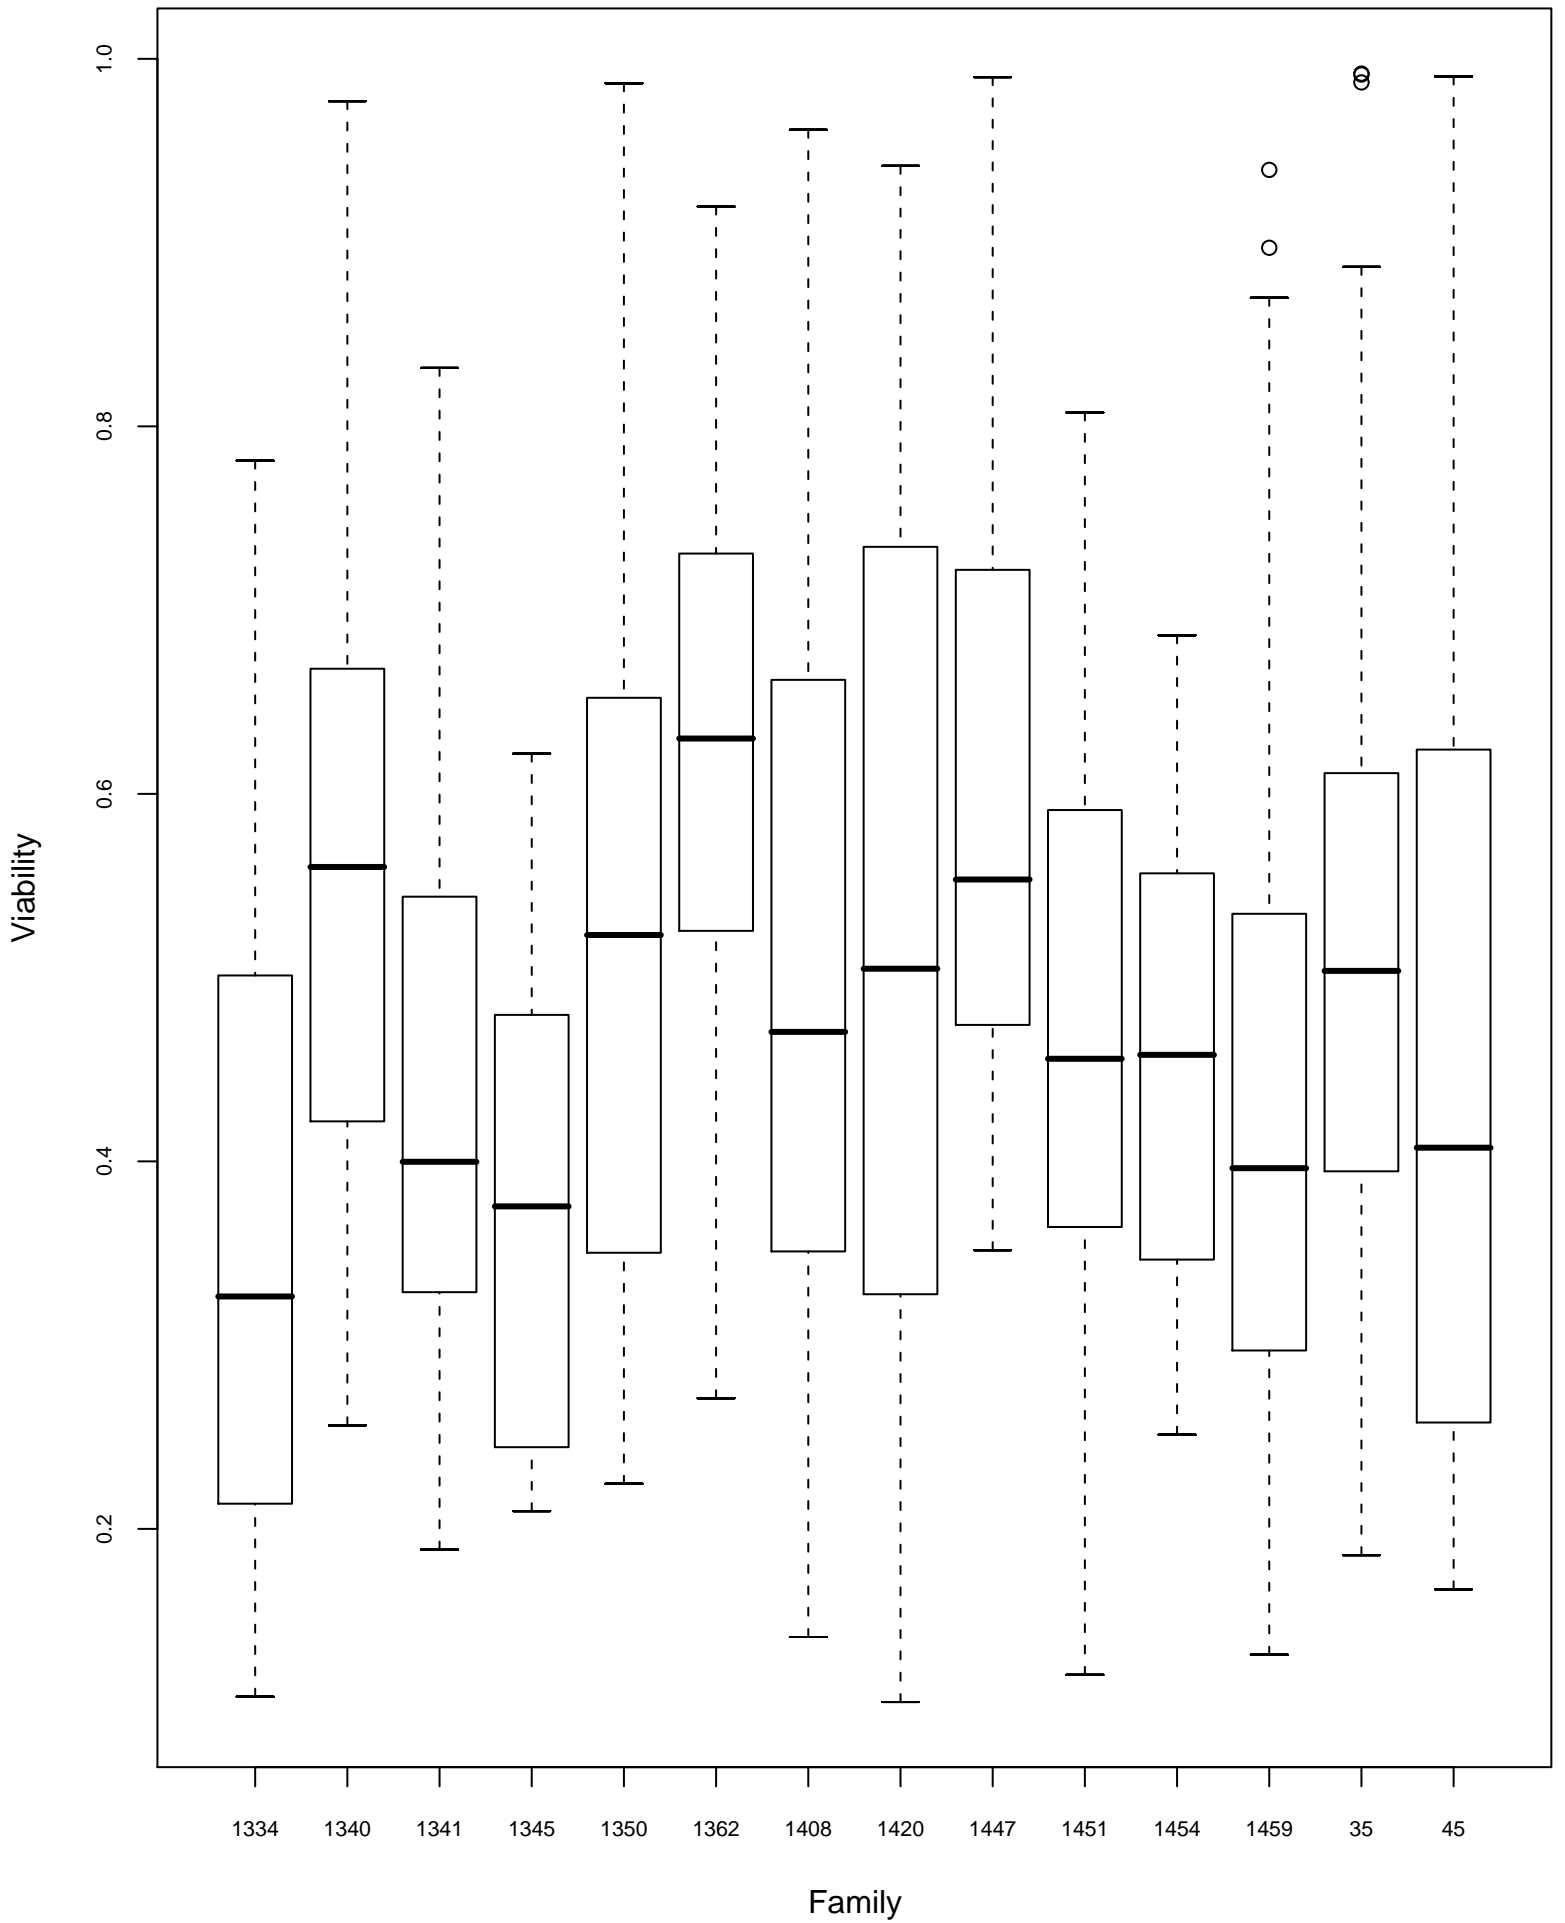

# Drug Gem, dose 1e-05 (mM)

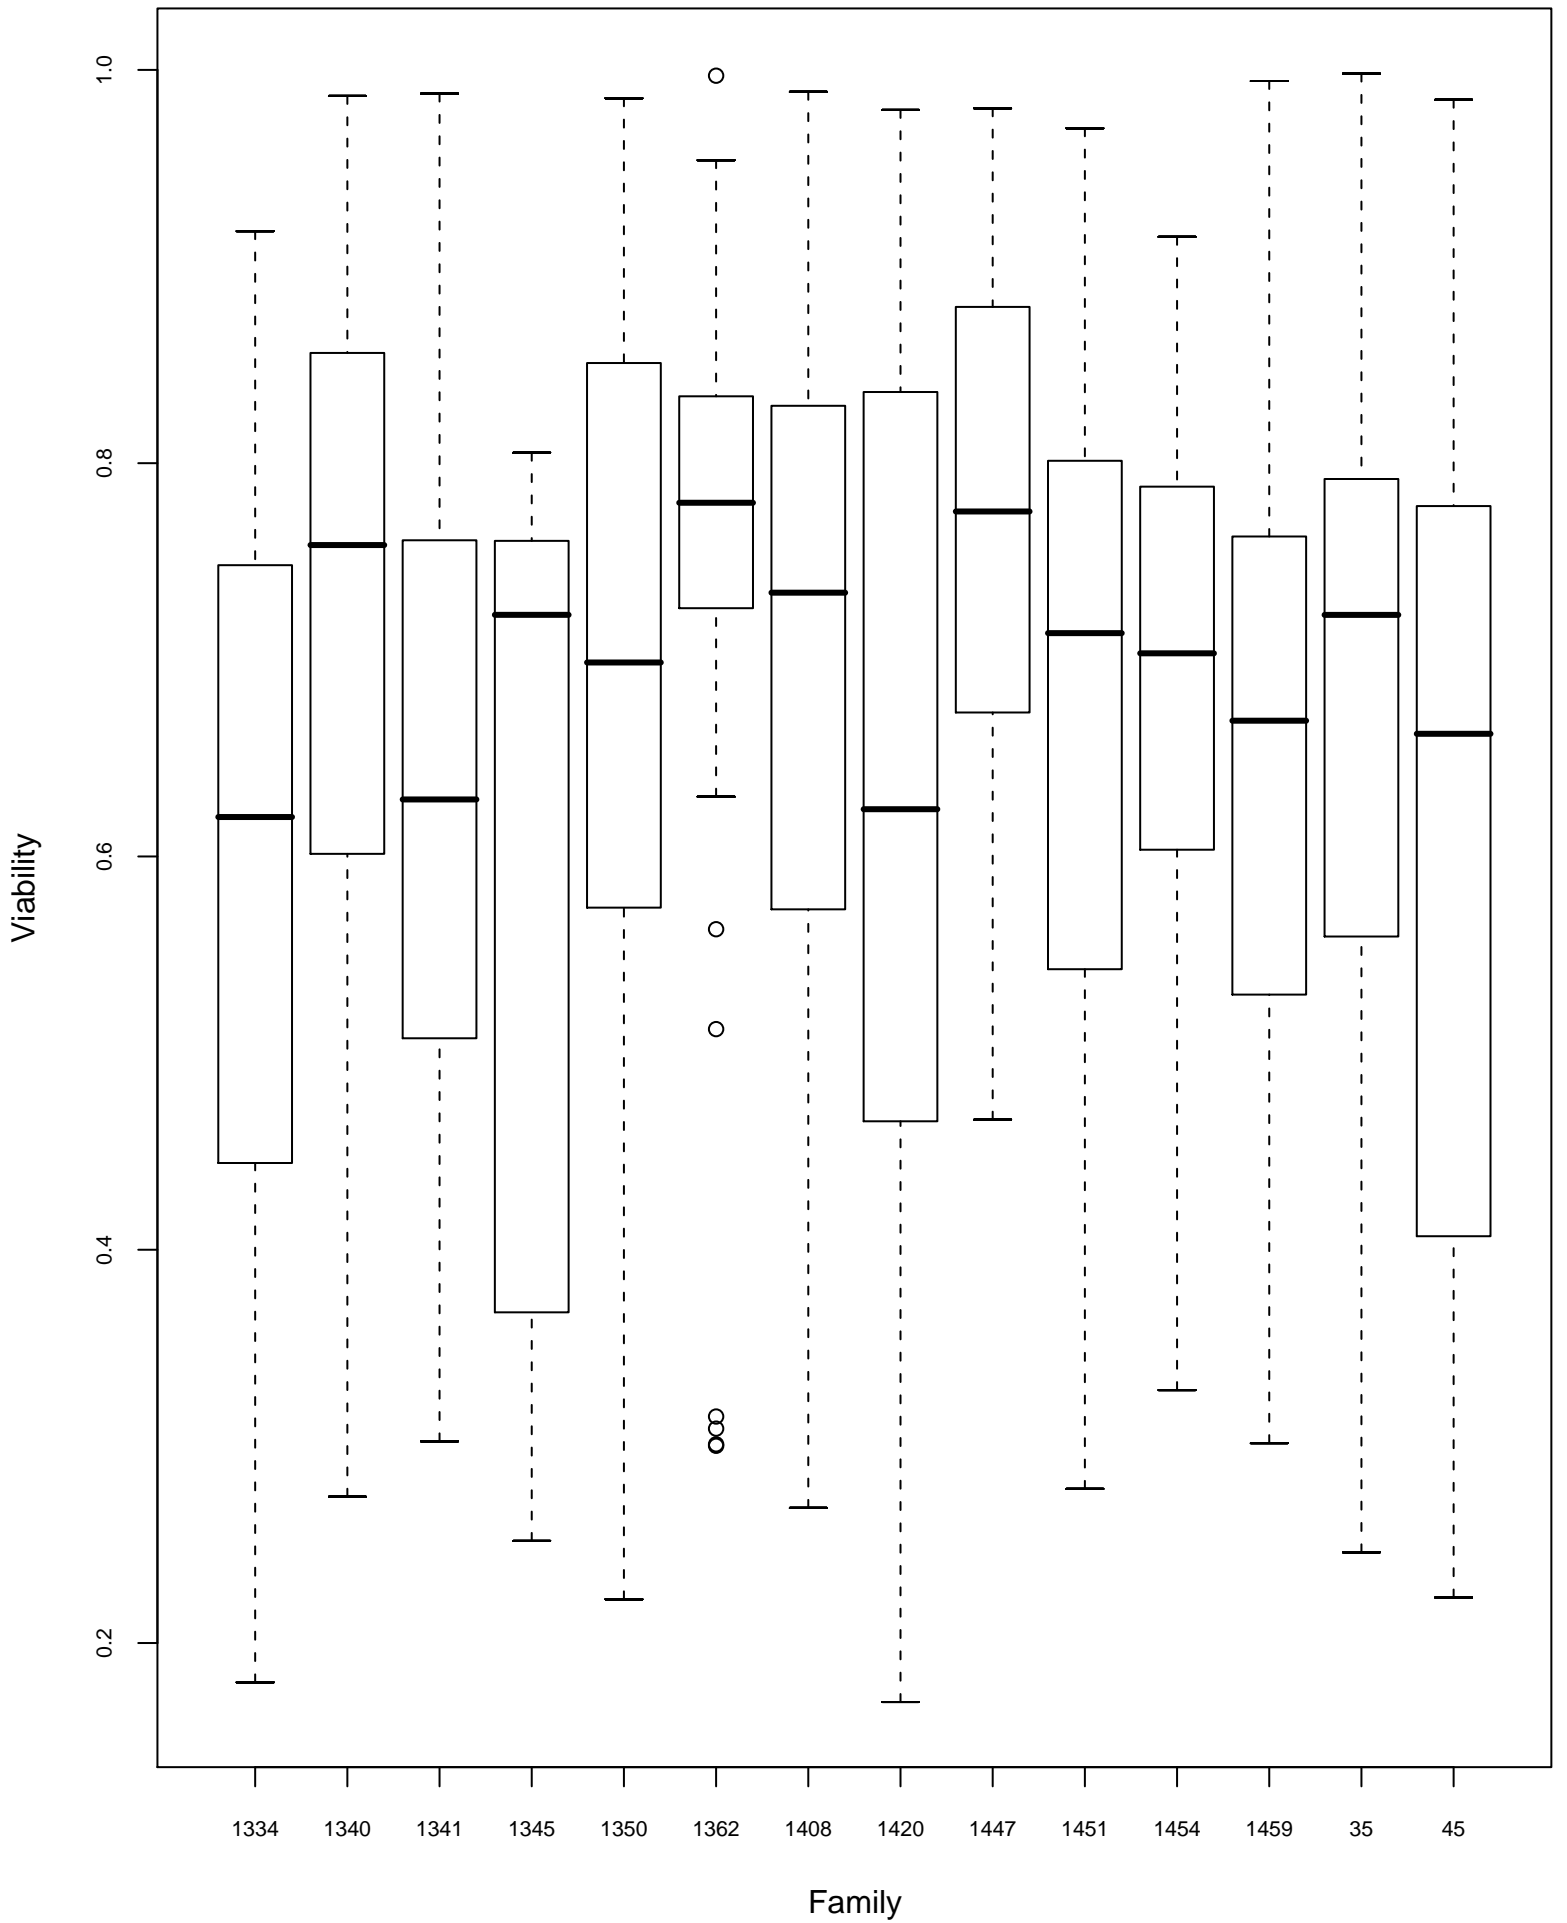

# Drug Gem, dose 5e-06 (mM)

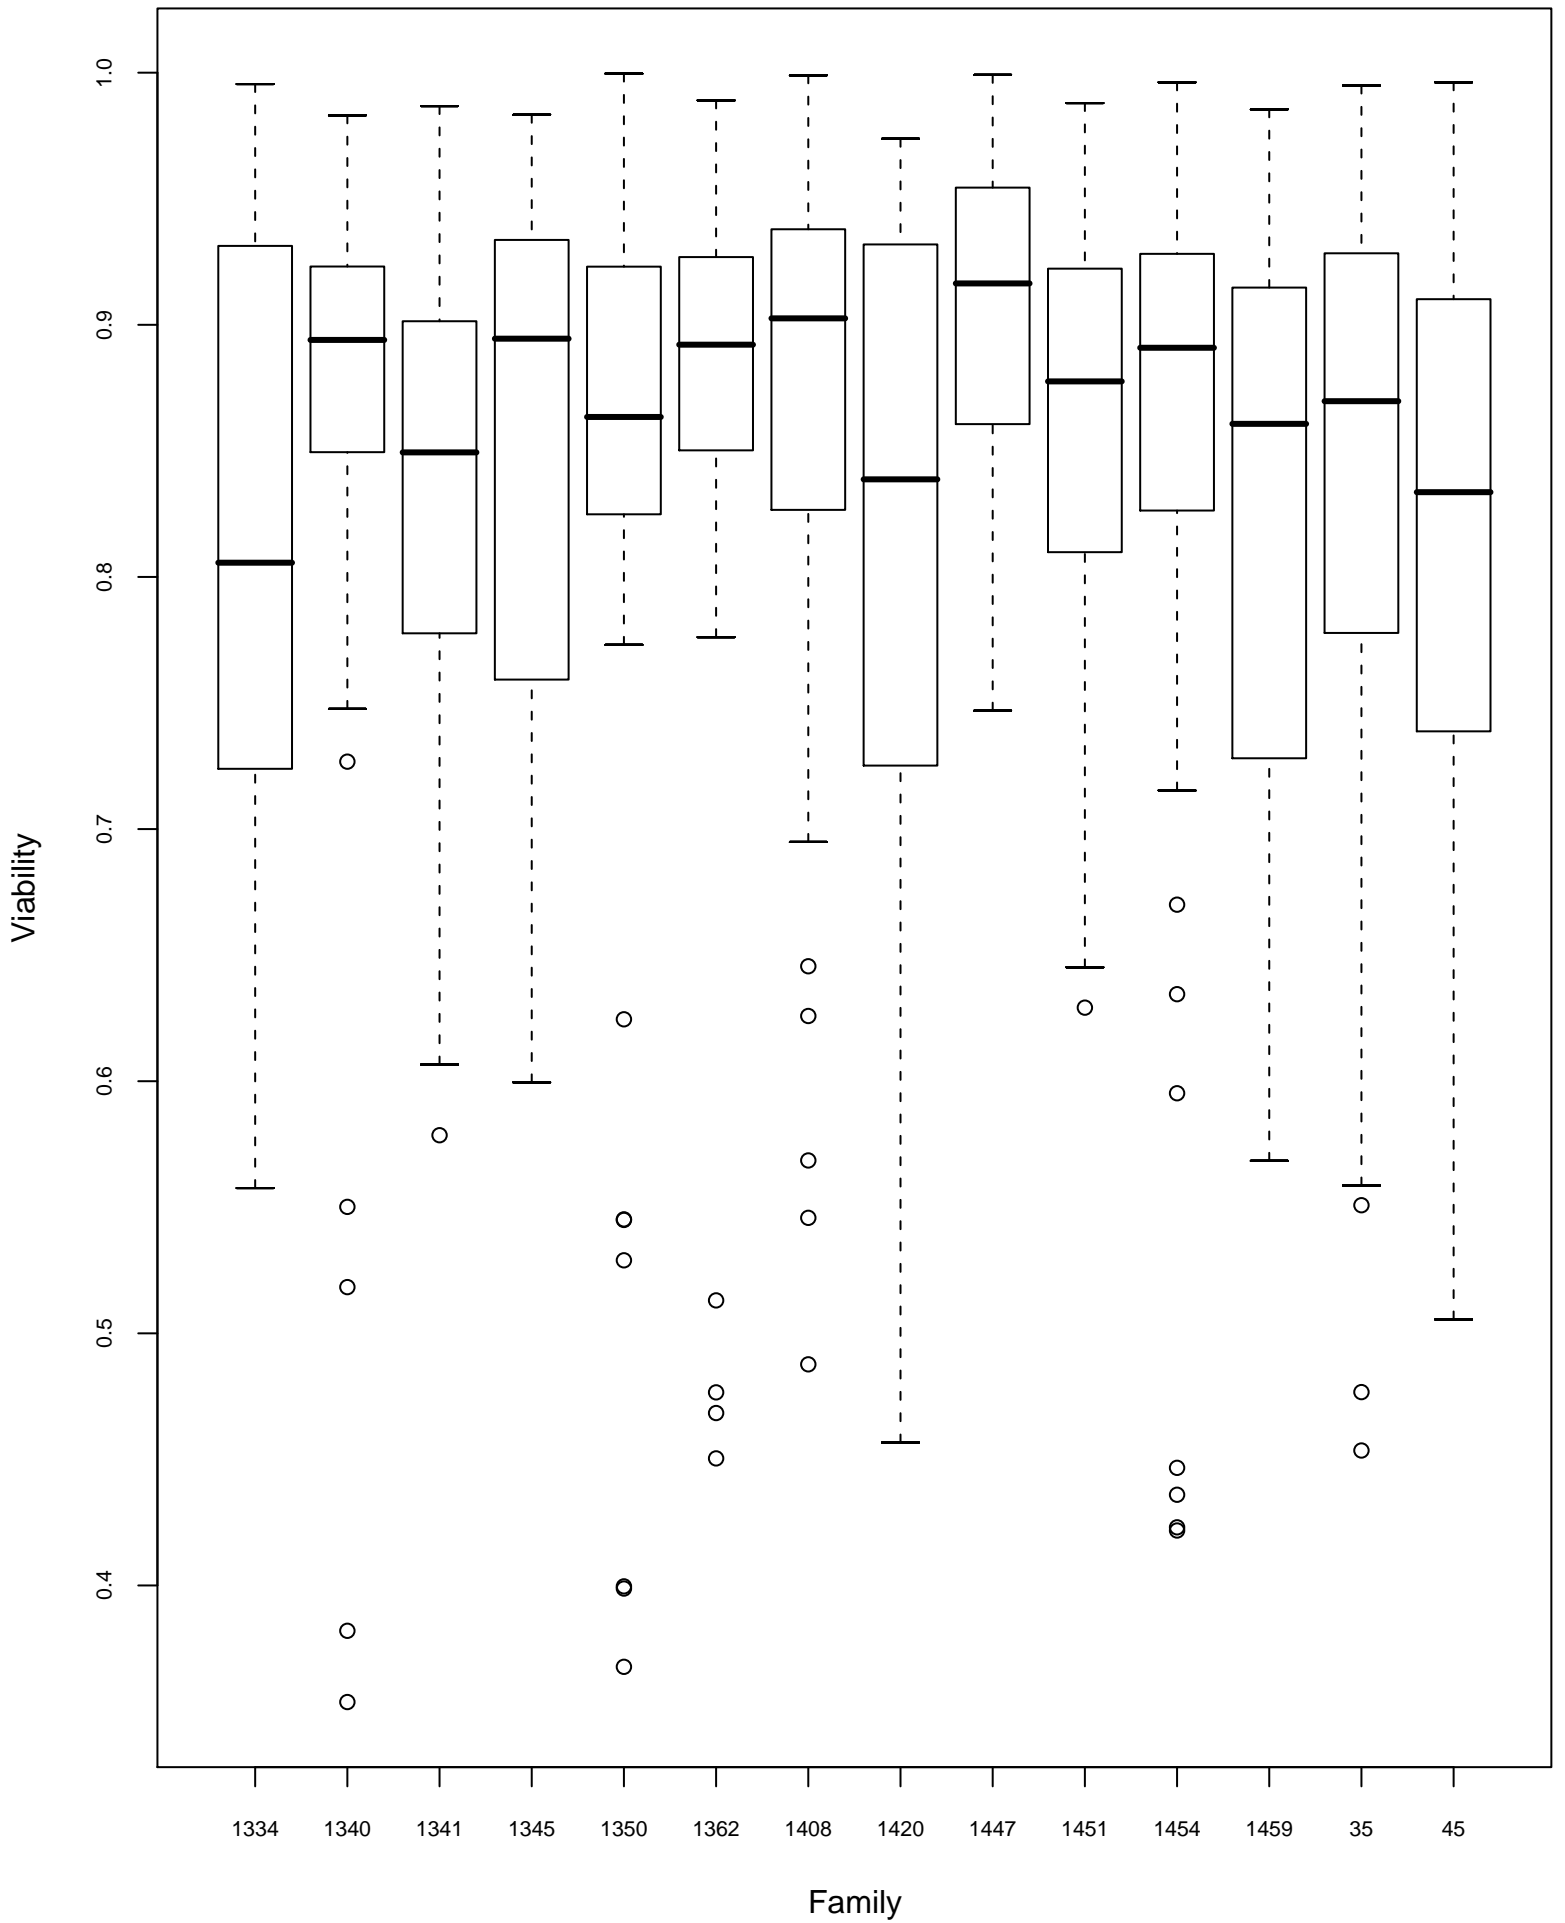

# Drug Gem, dose 2.5e-06 (mM)

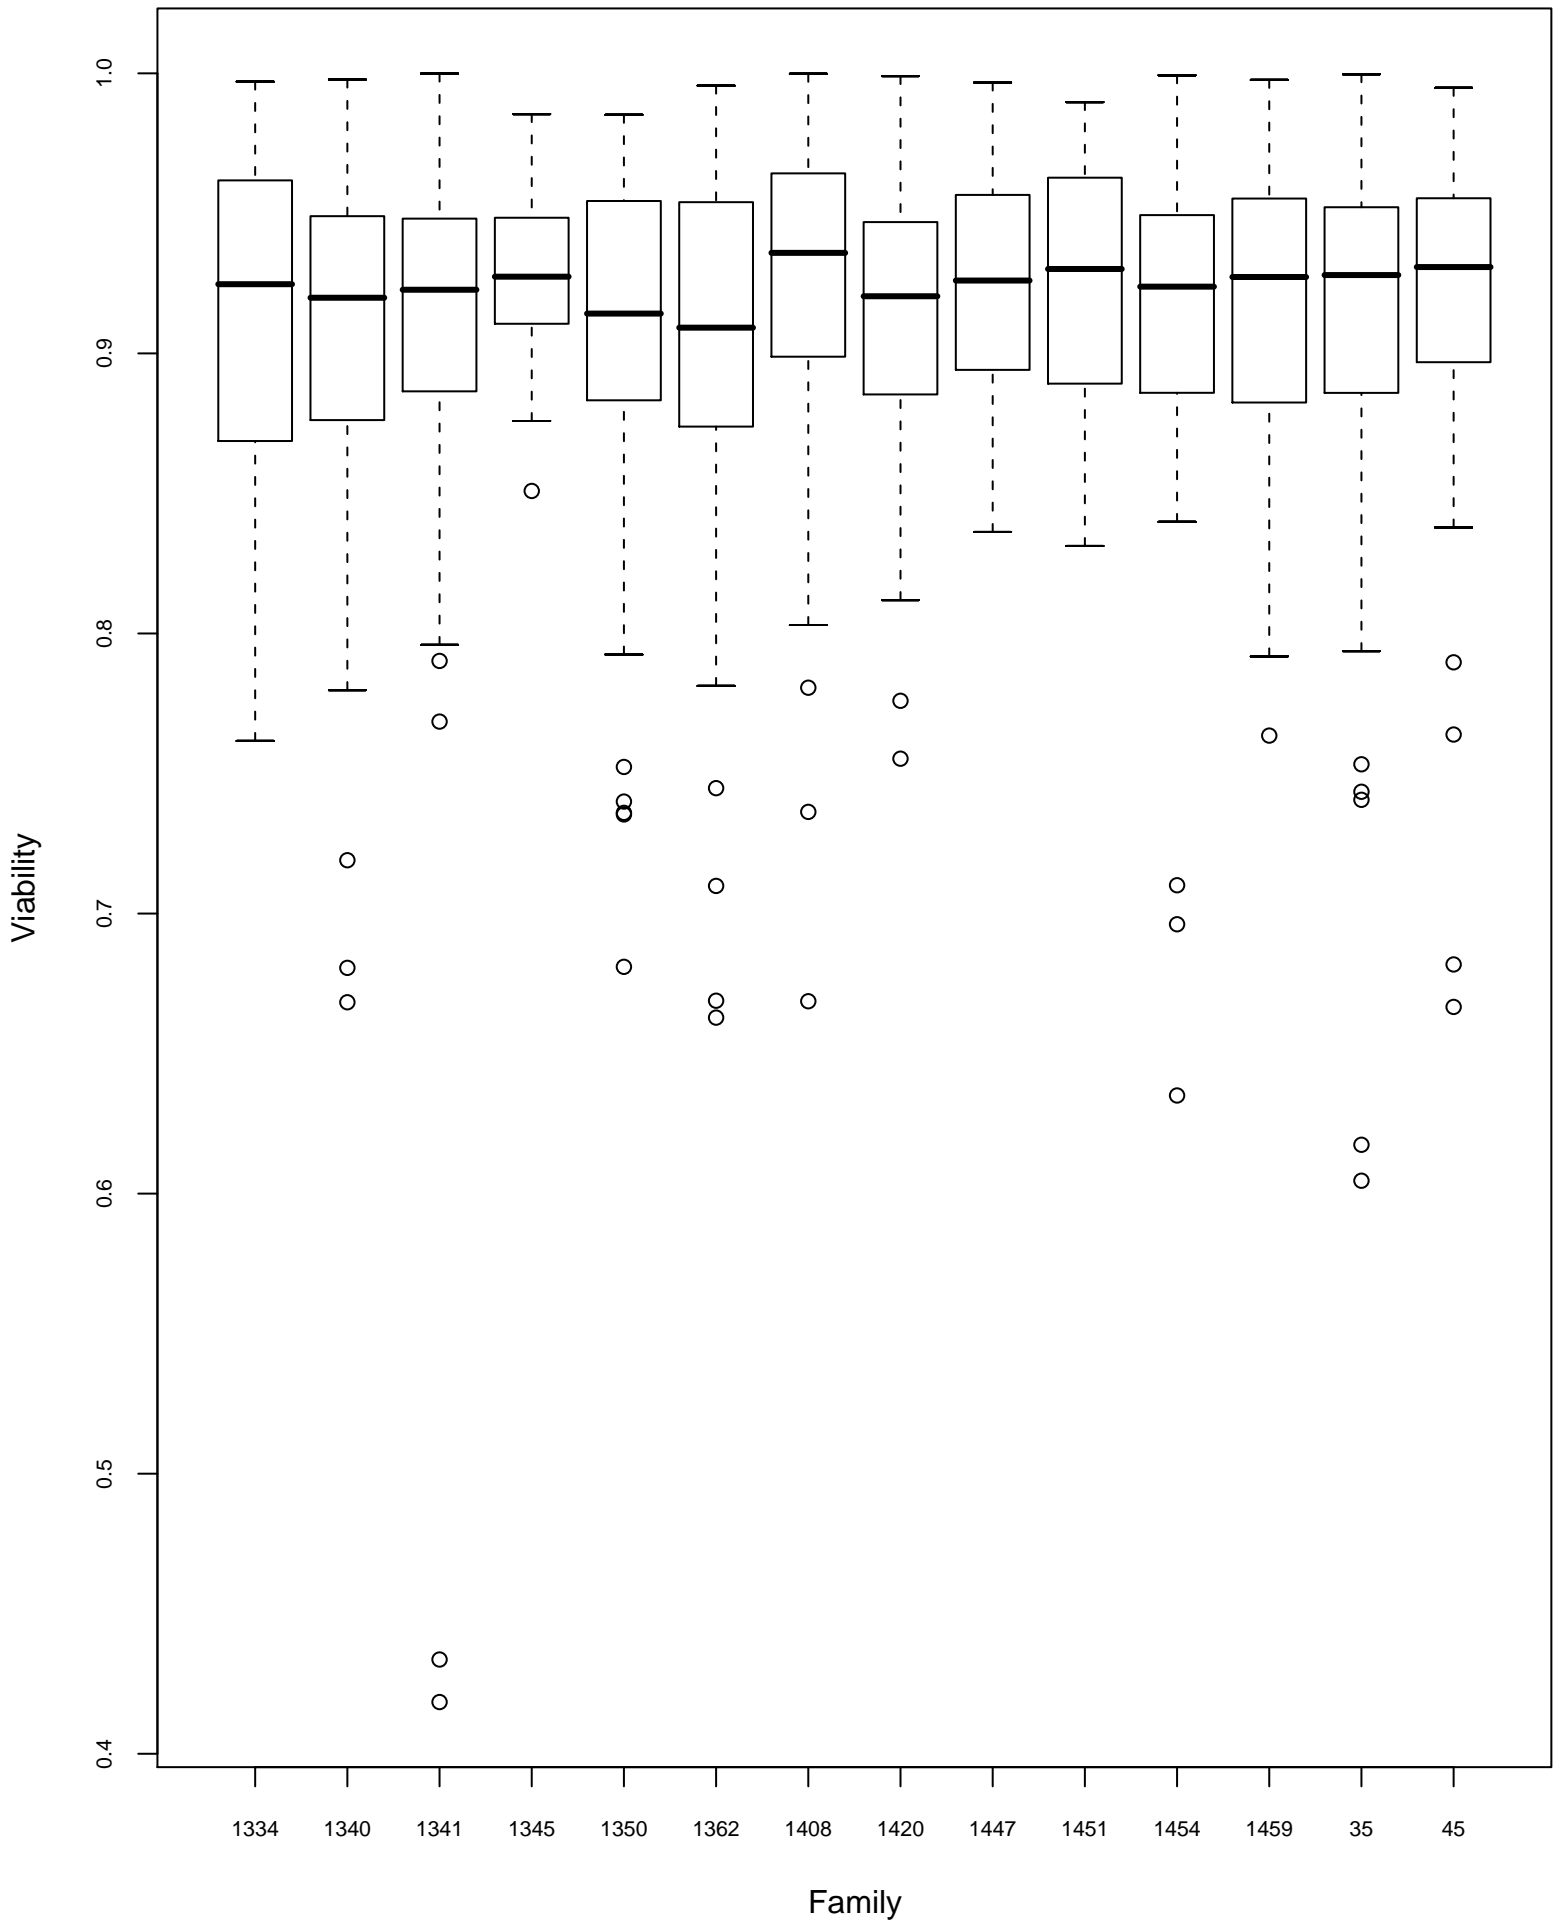



# Drug Hydrox, dose 0.3 (mM)

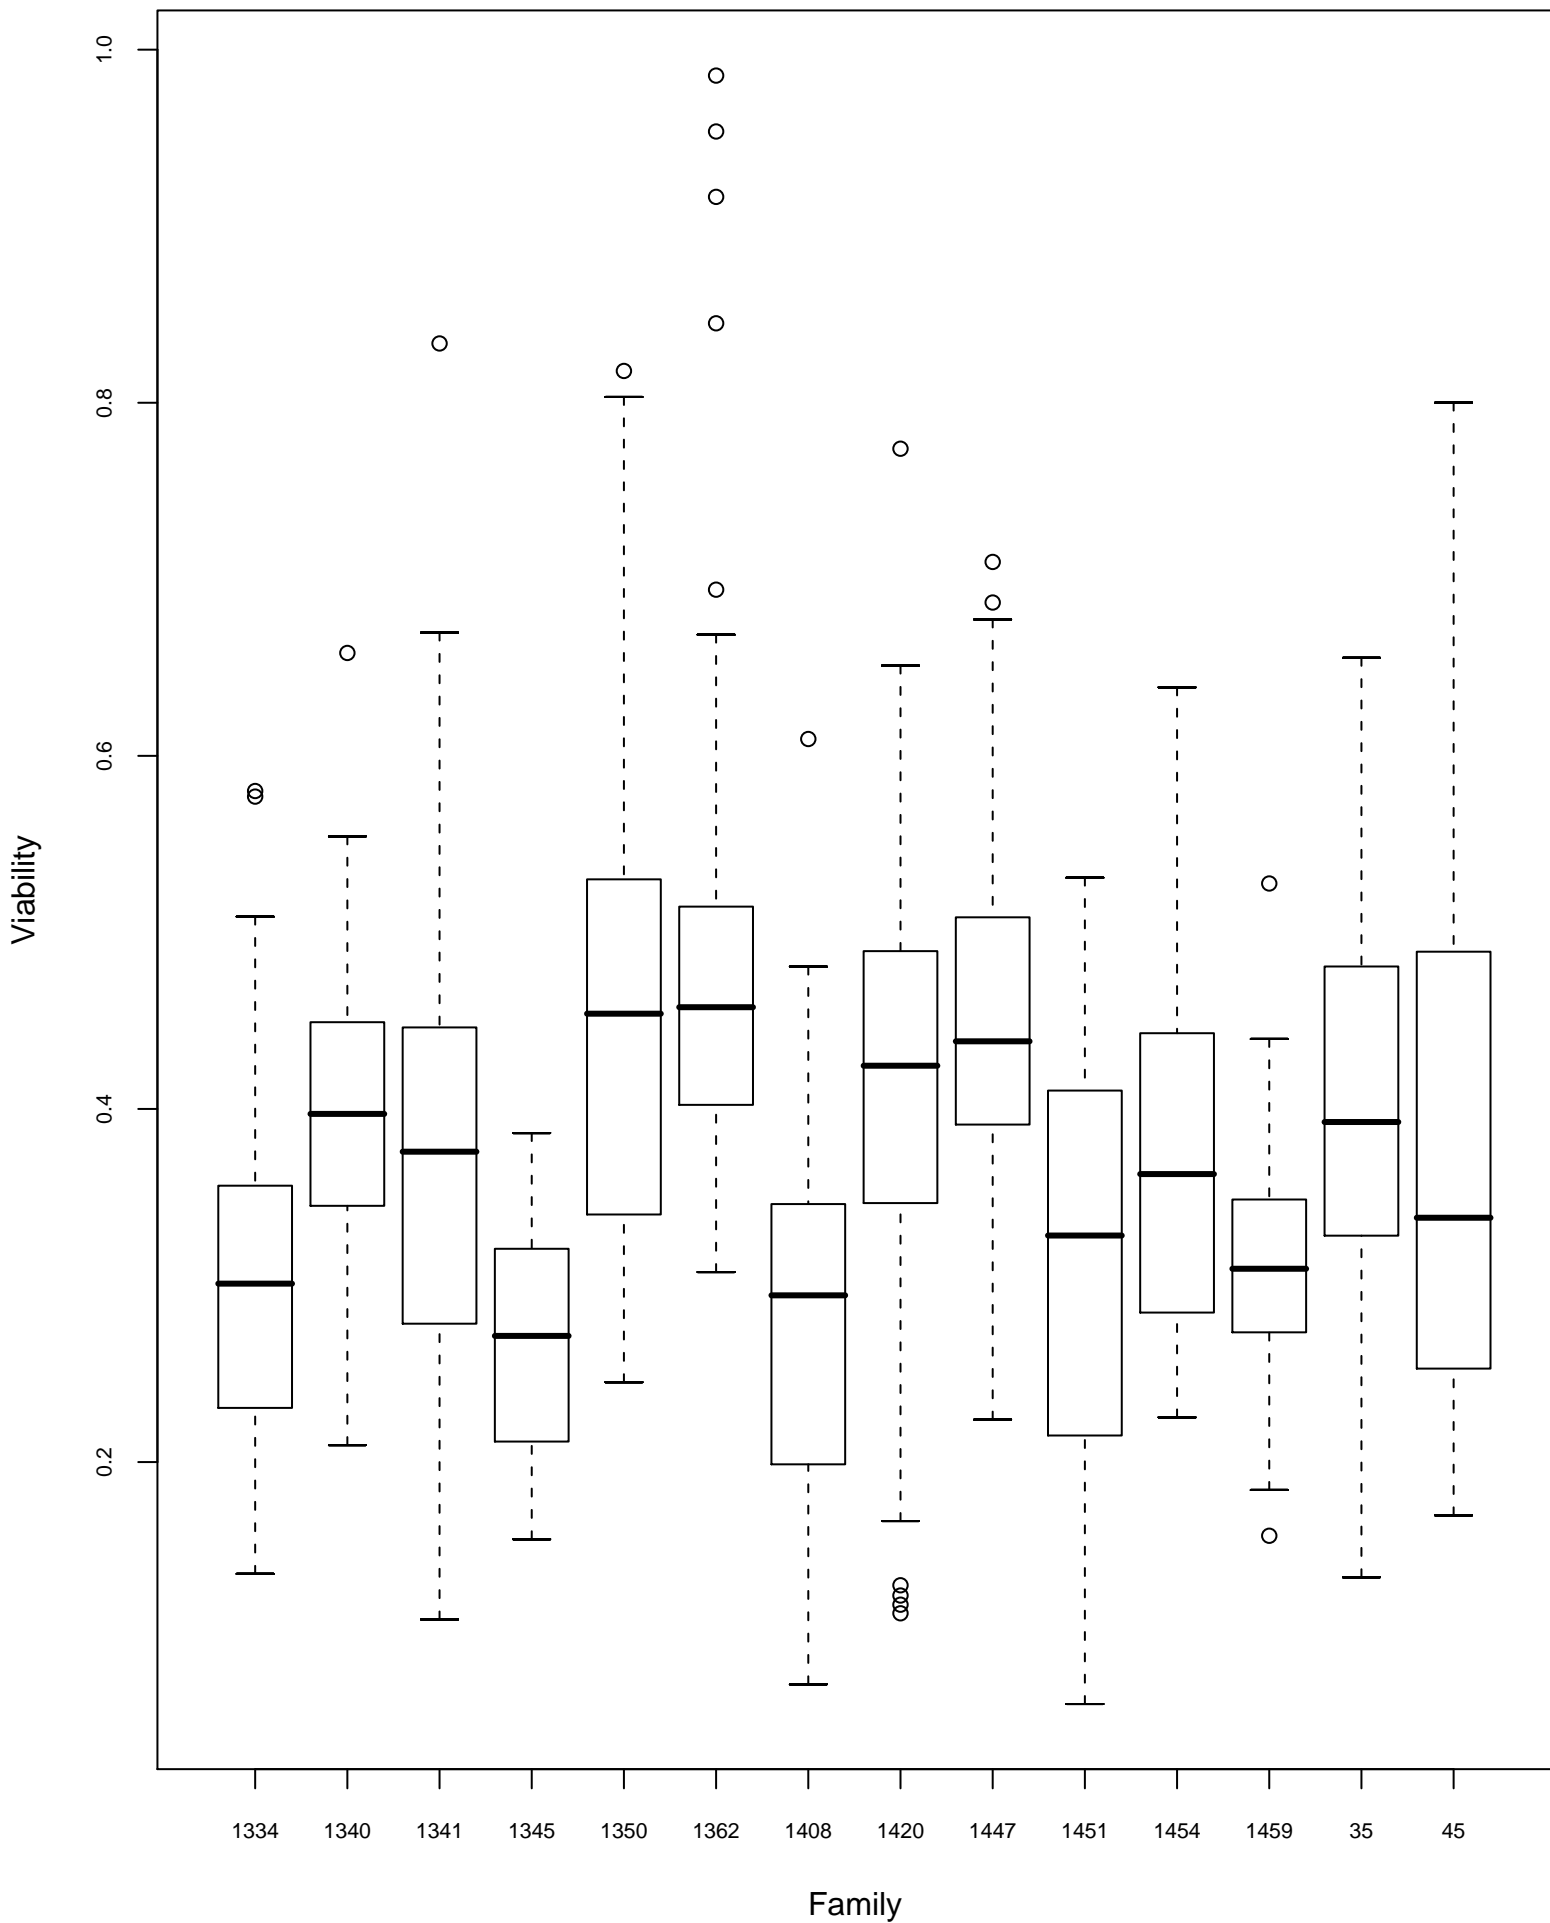

# Drug Hydrox, dose 0.15 (mM)

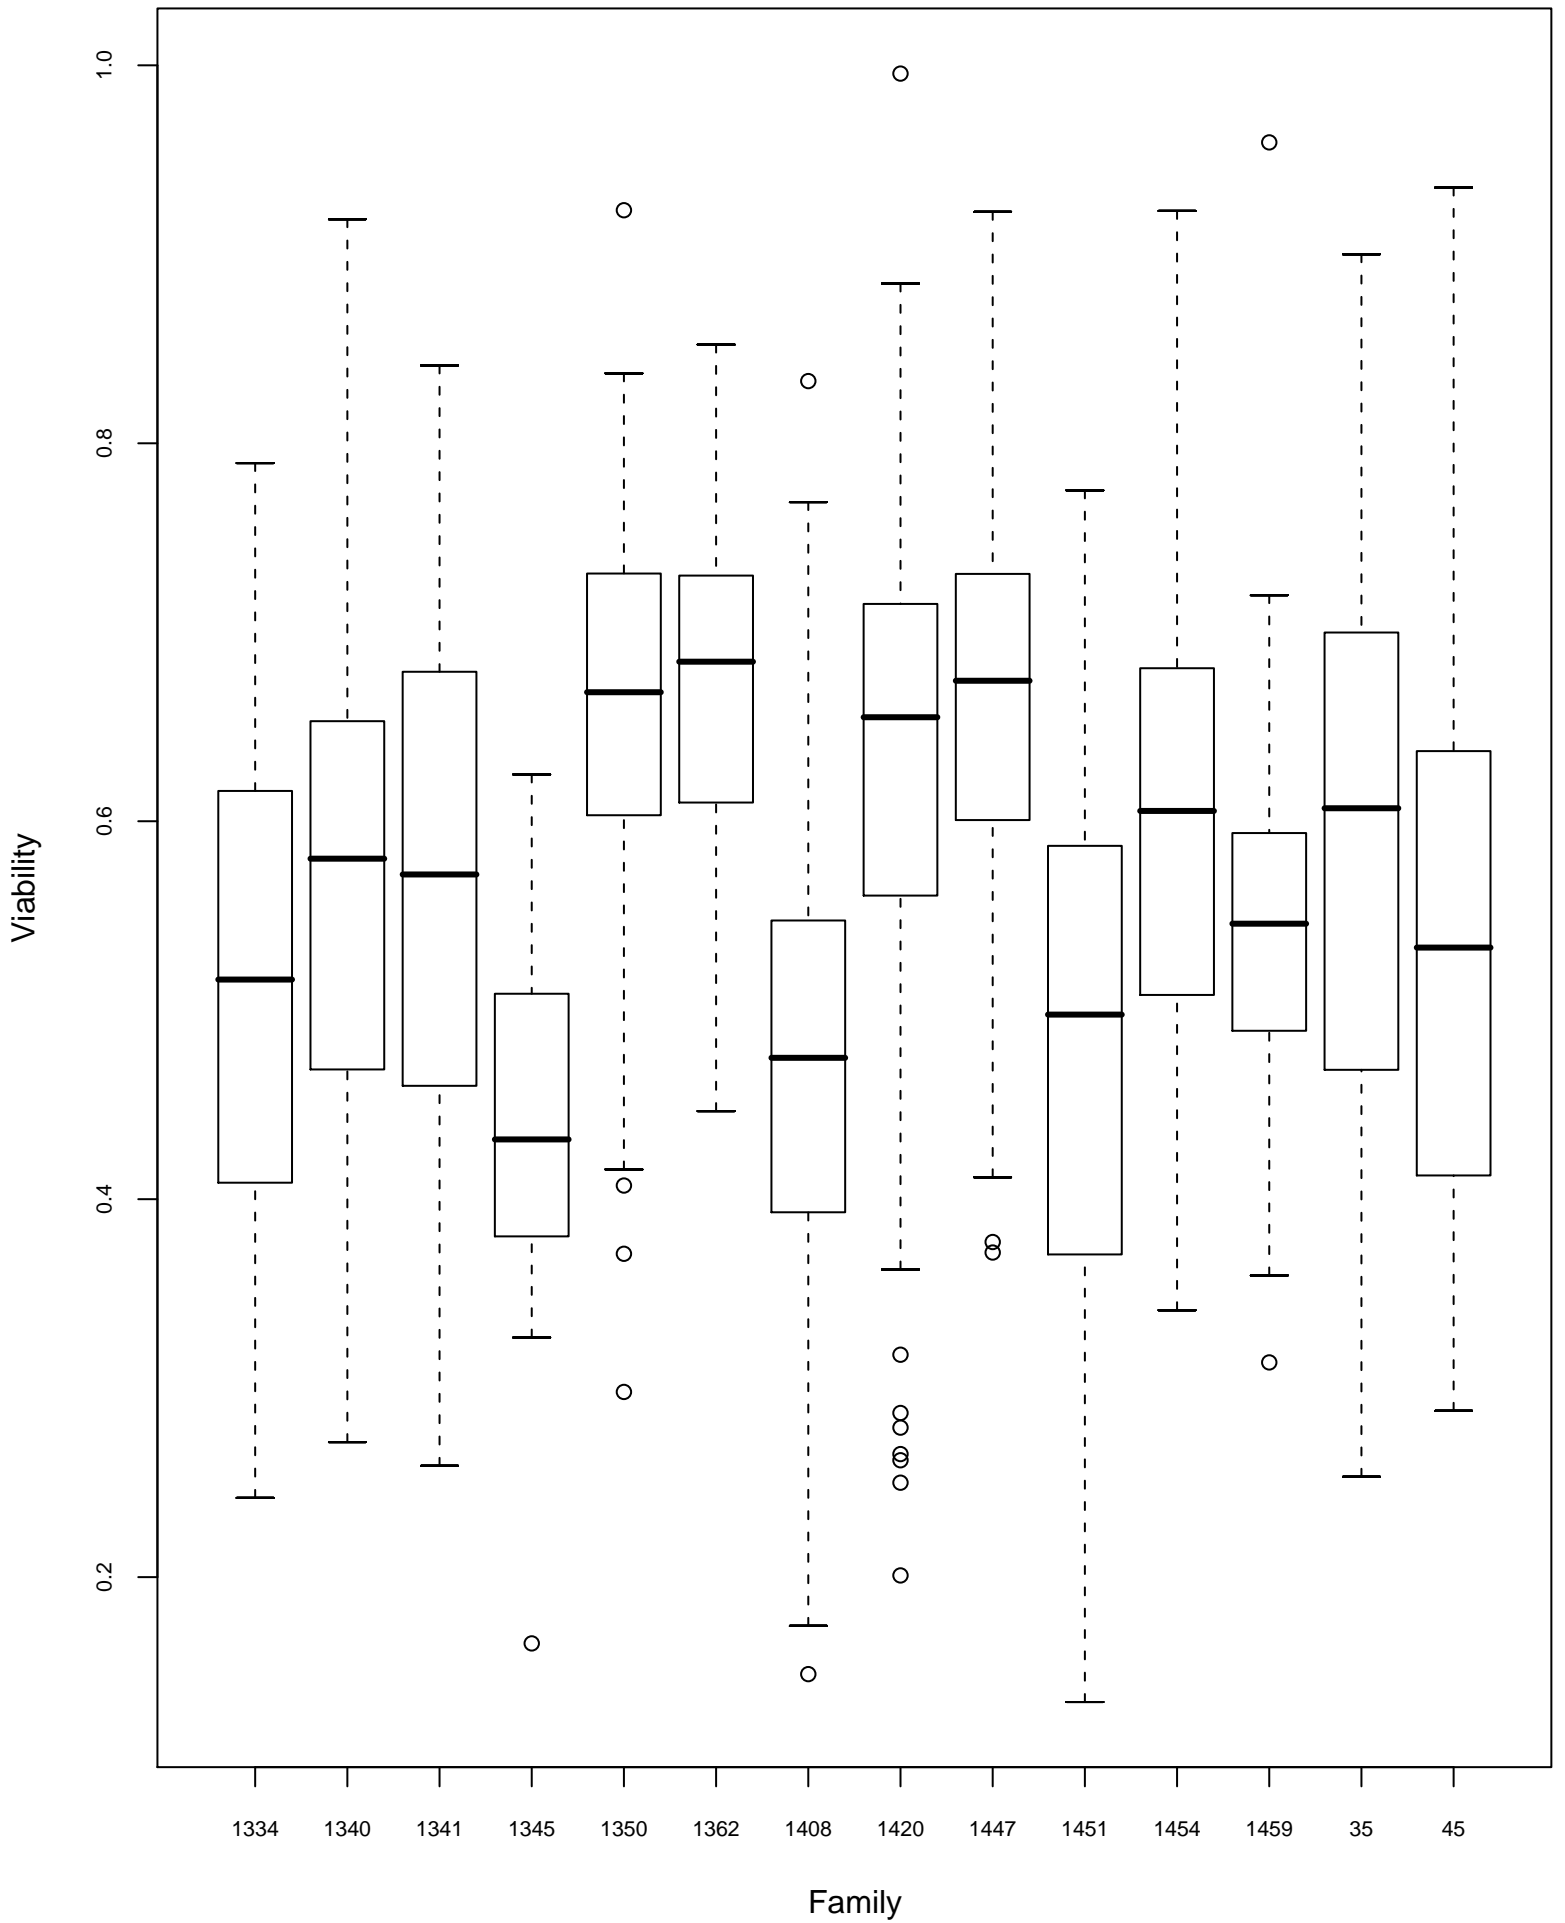

# Drug Hydrox, dose 0.075 (mM)

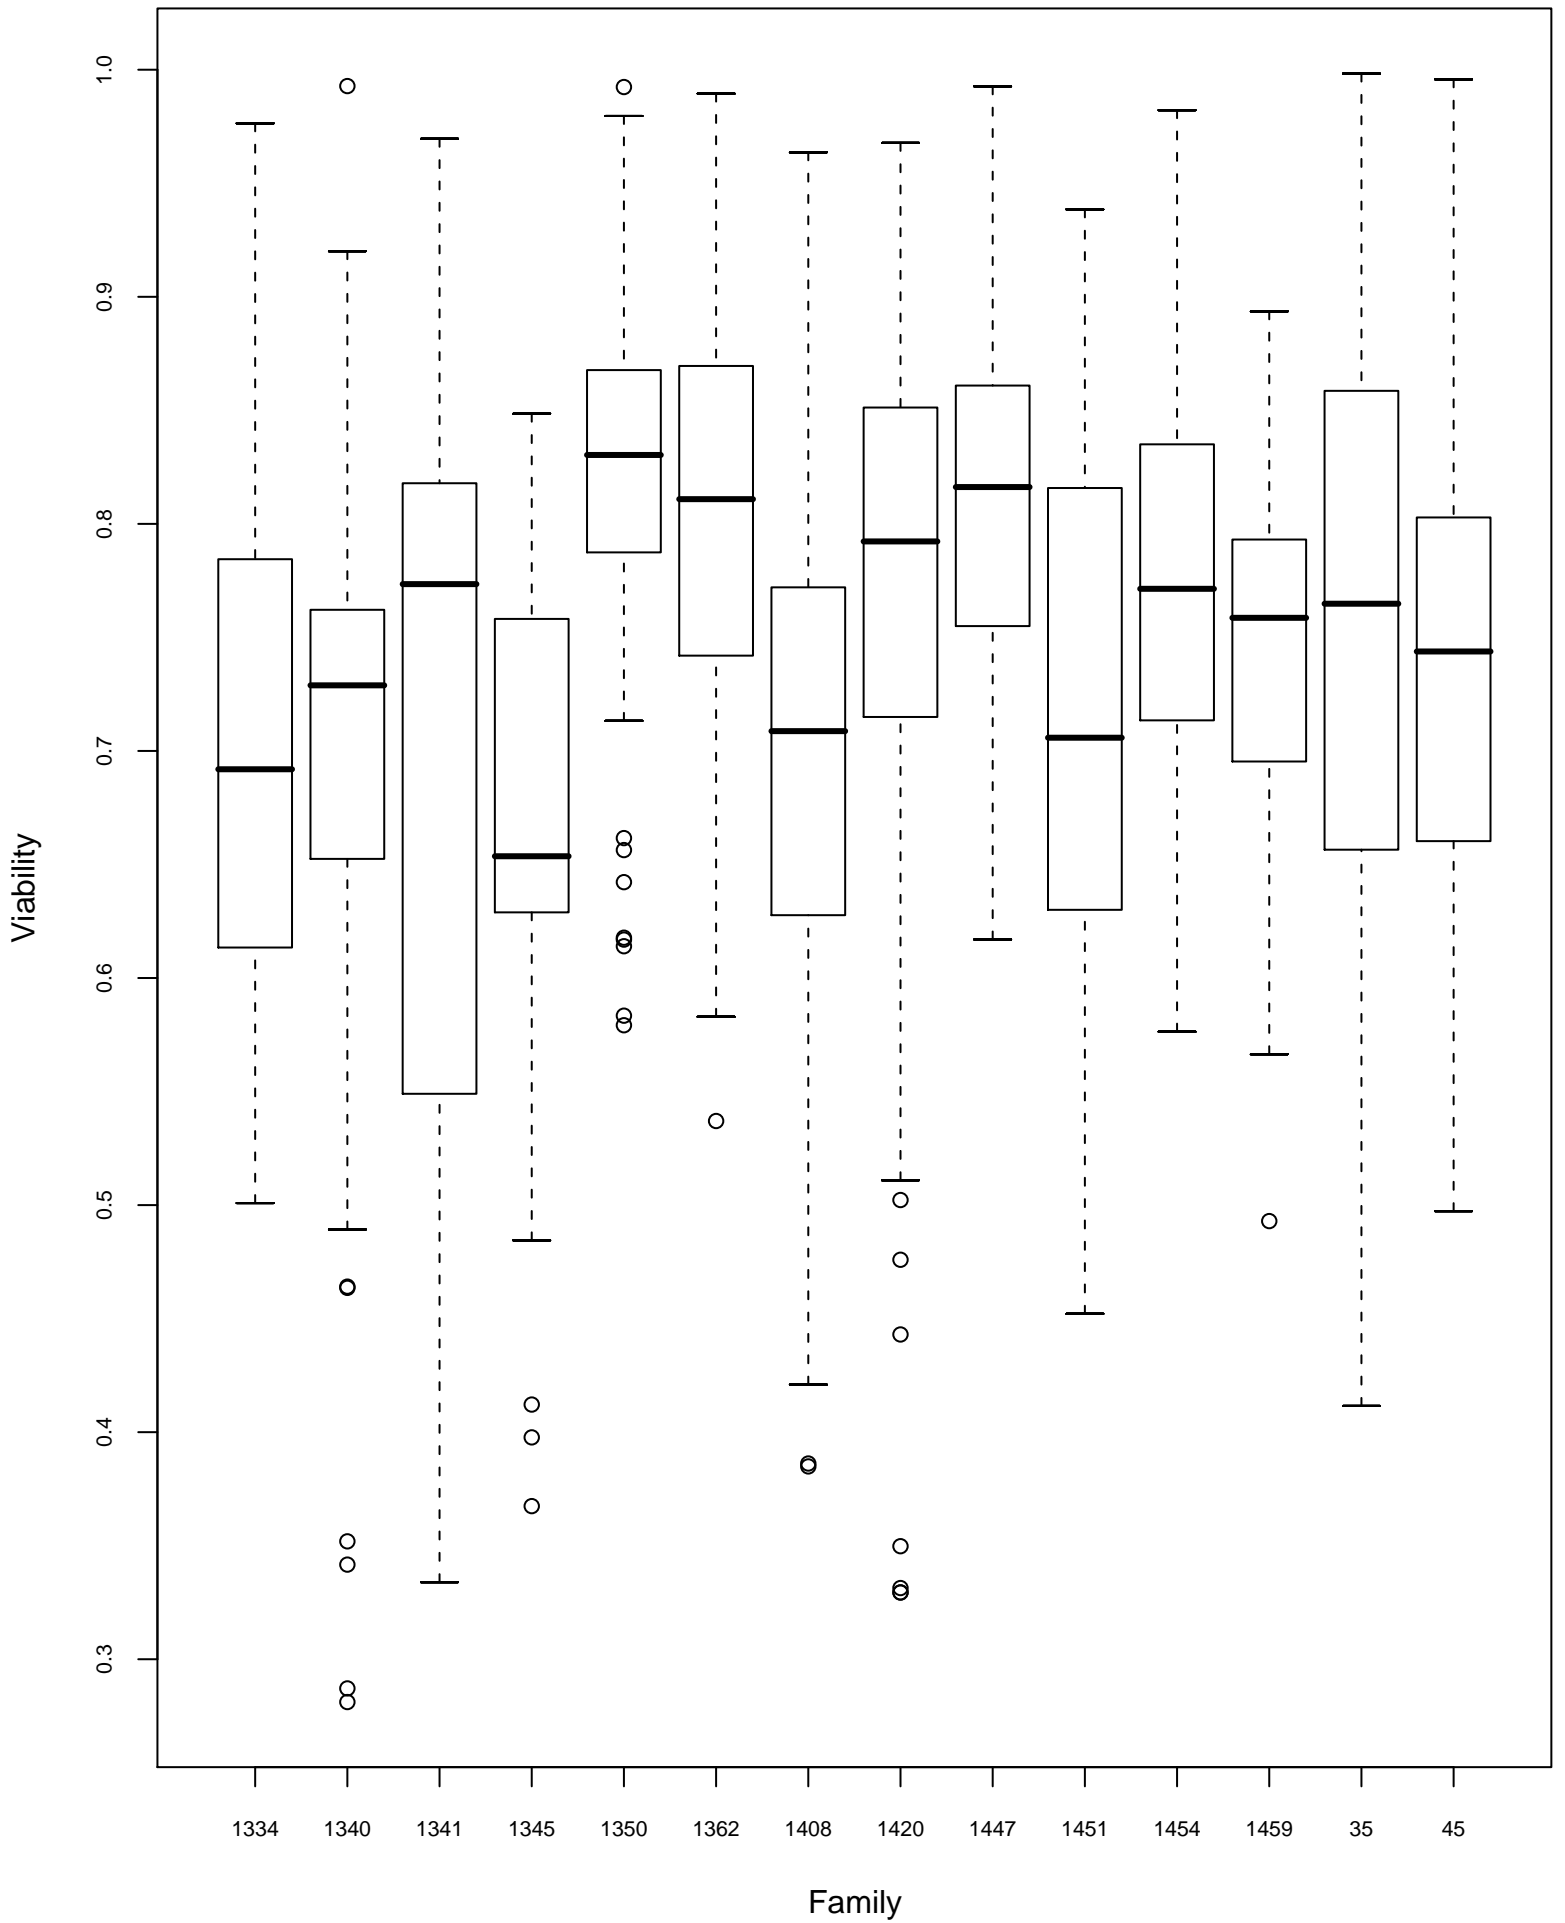

# Drug Hydrox, dose 0.0375 (mM)

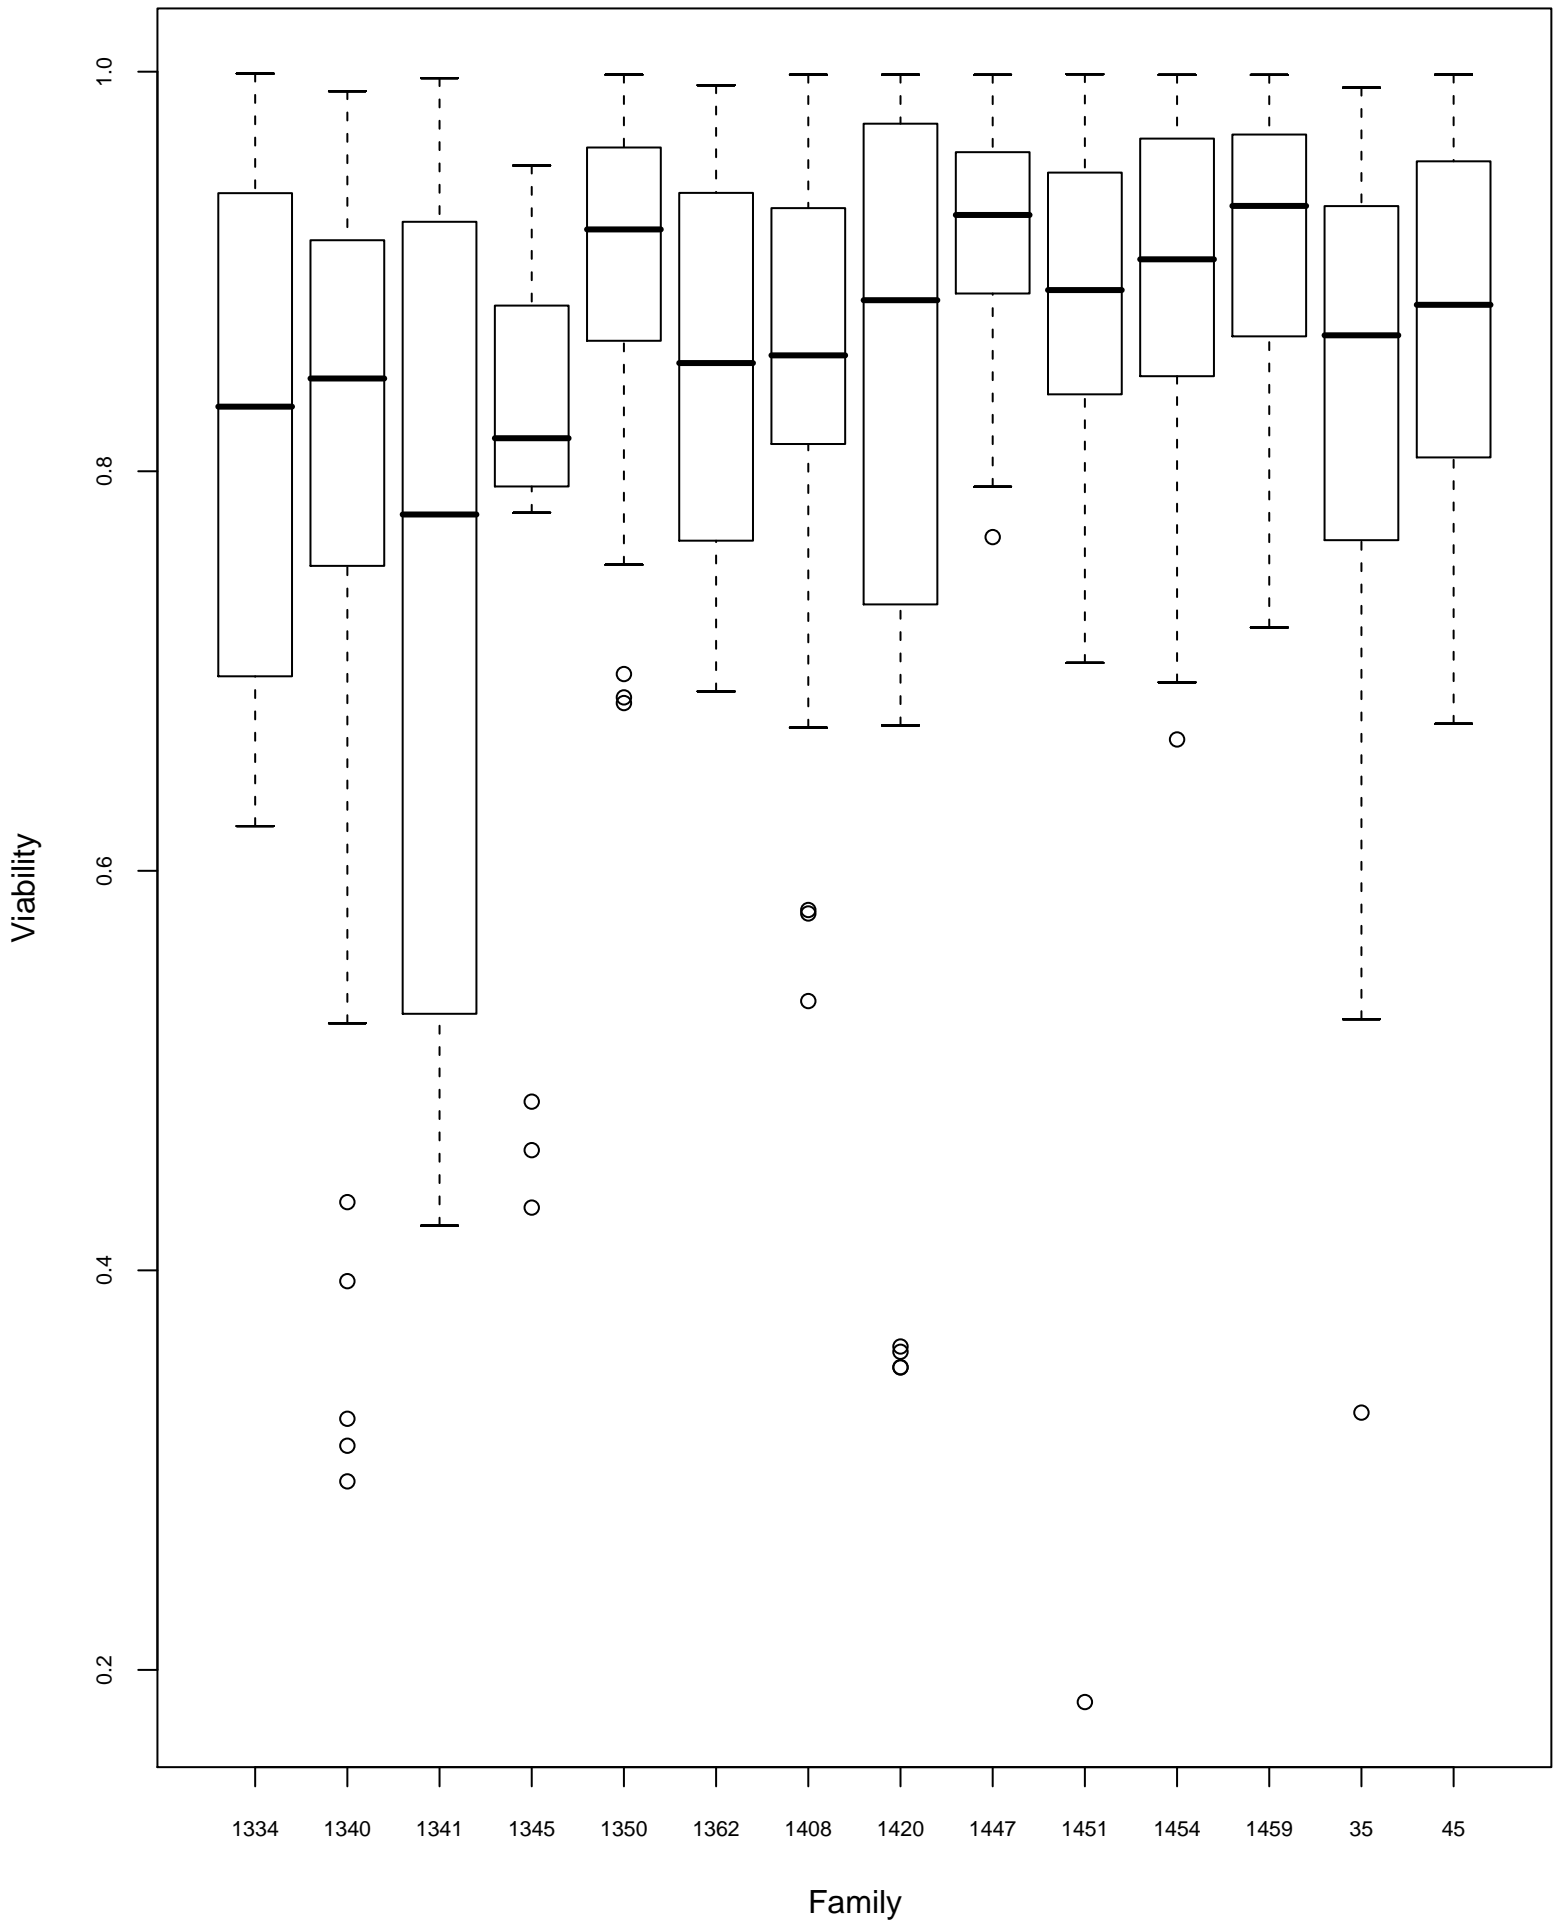

Drug Ida, dose 6.25e-05 (mM)

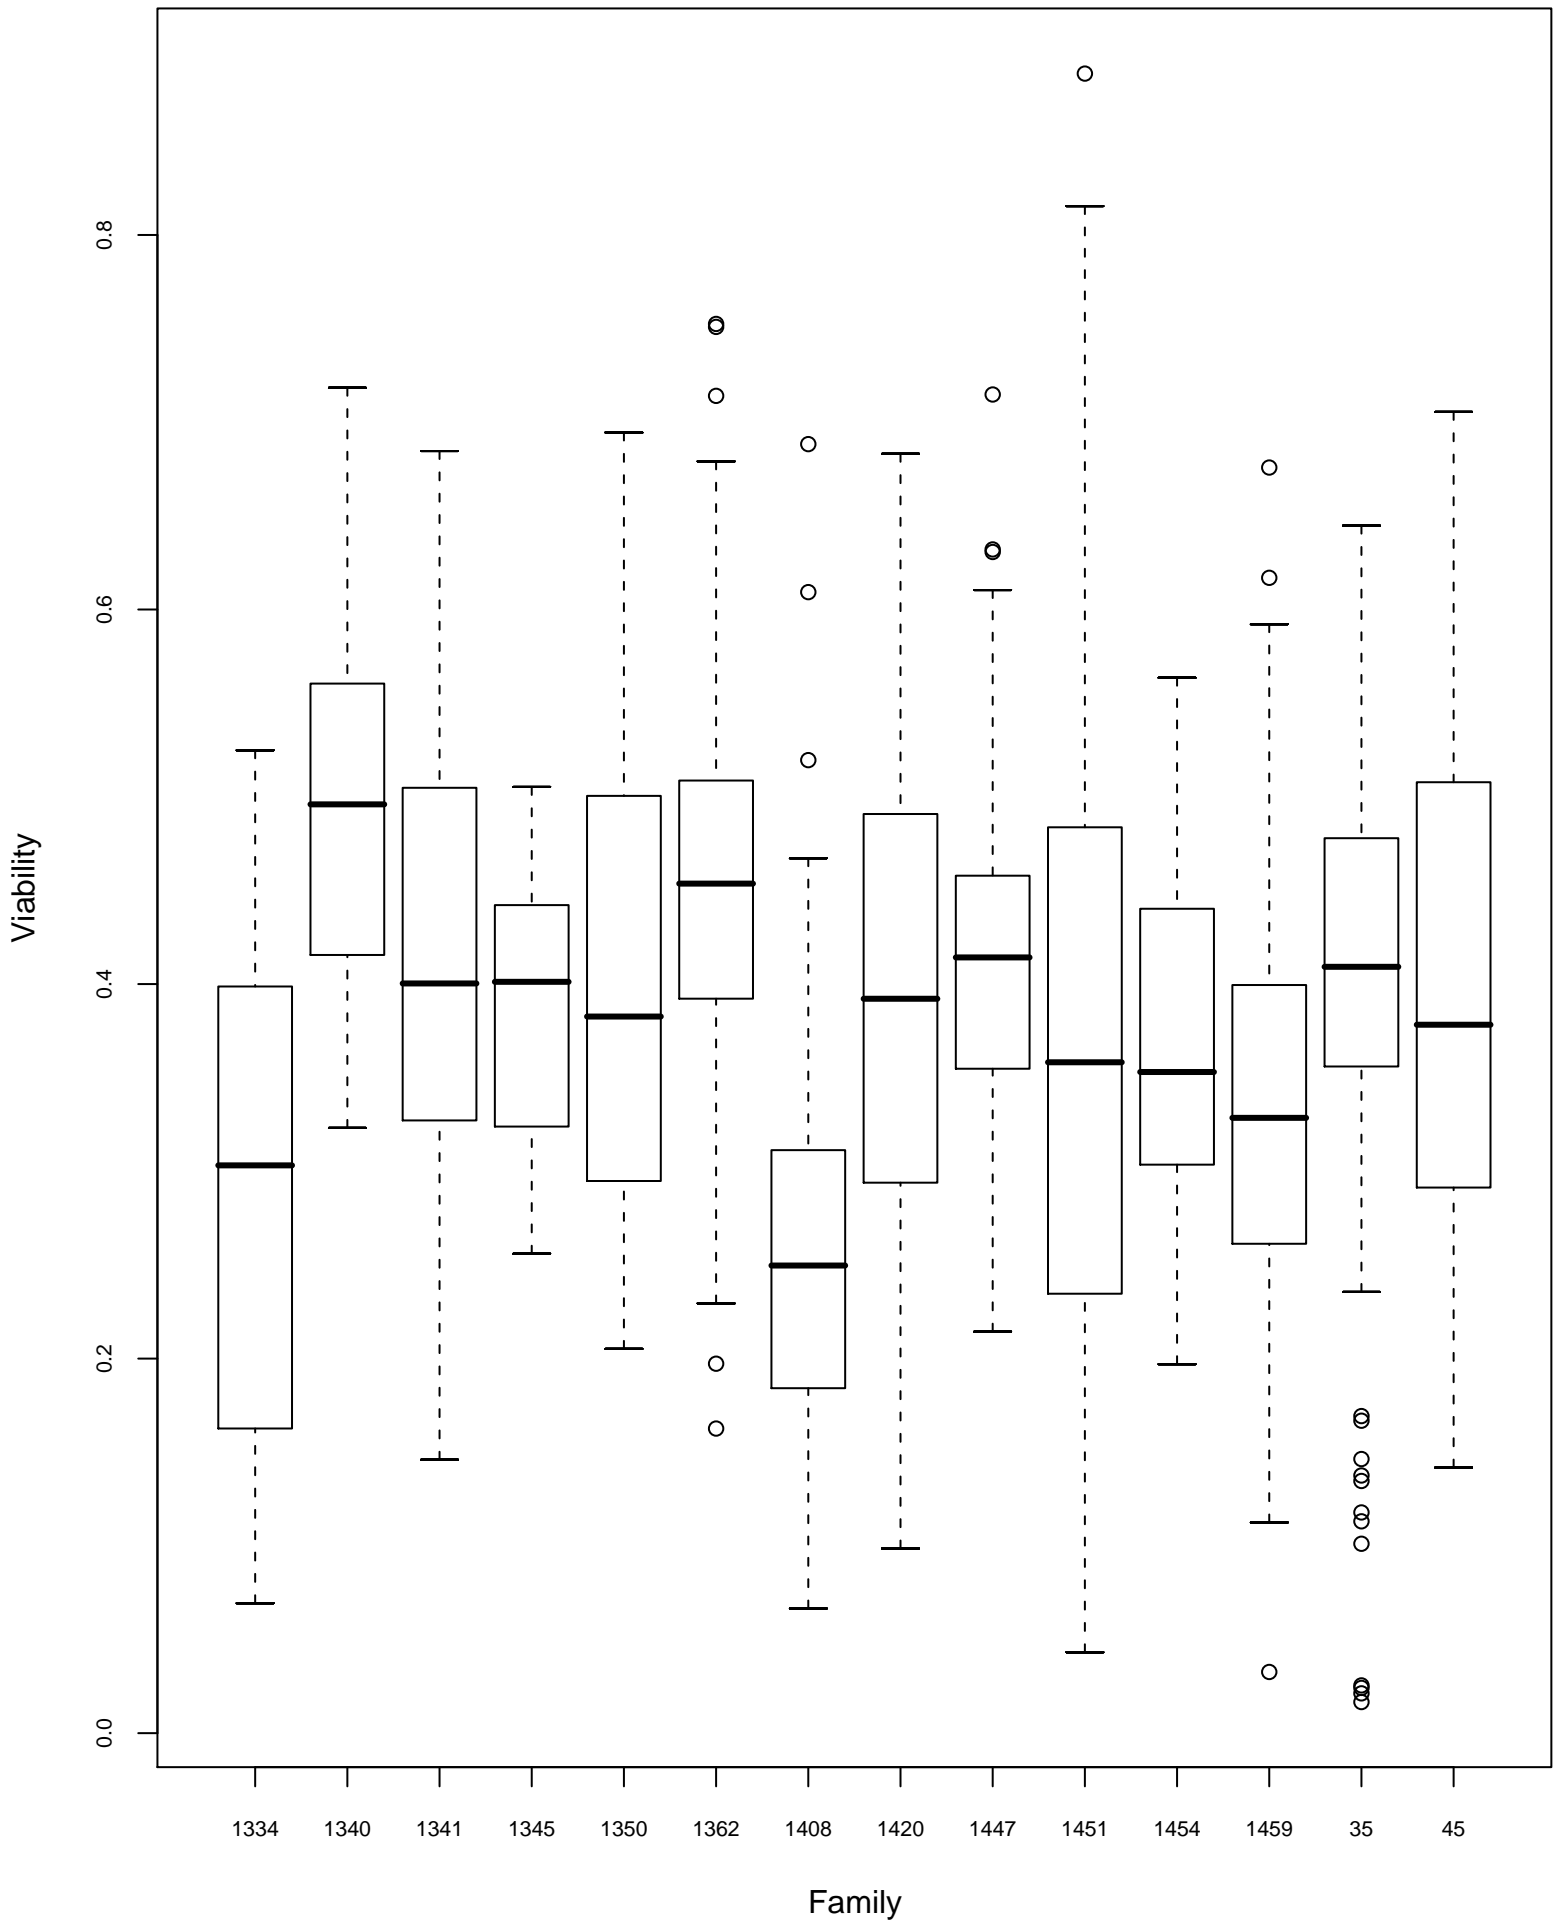

Drug Ida, dose 2.78e-05 (mM)

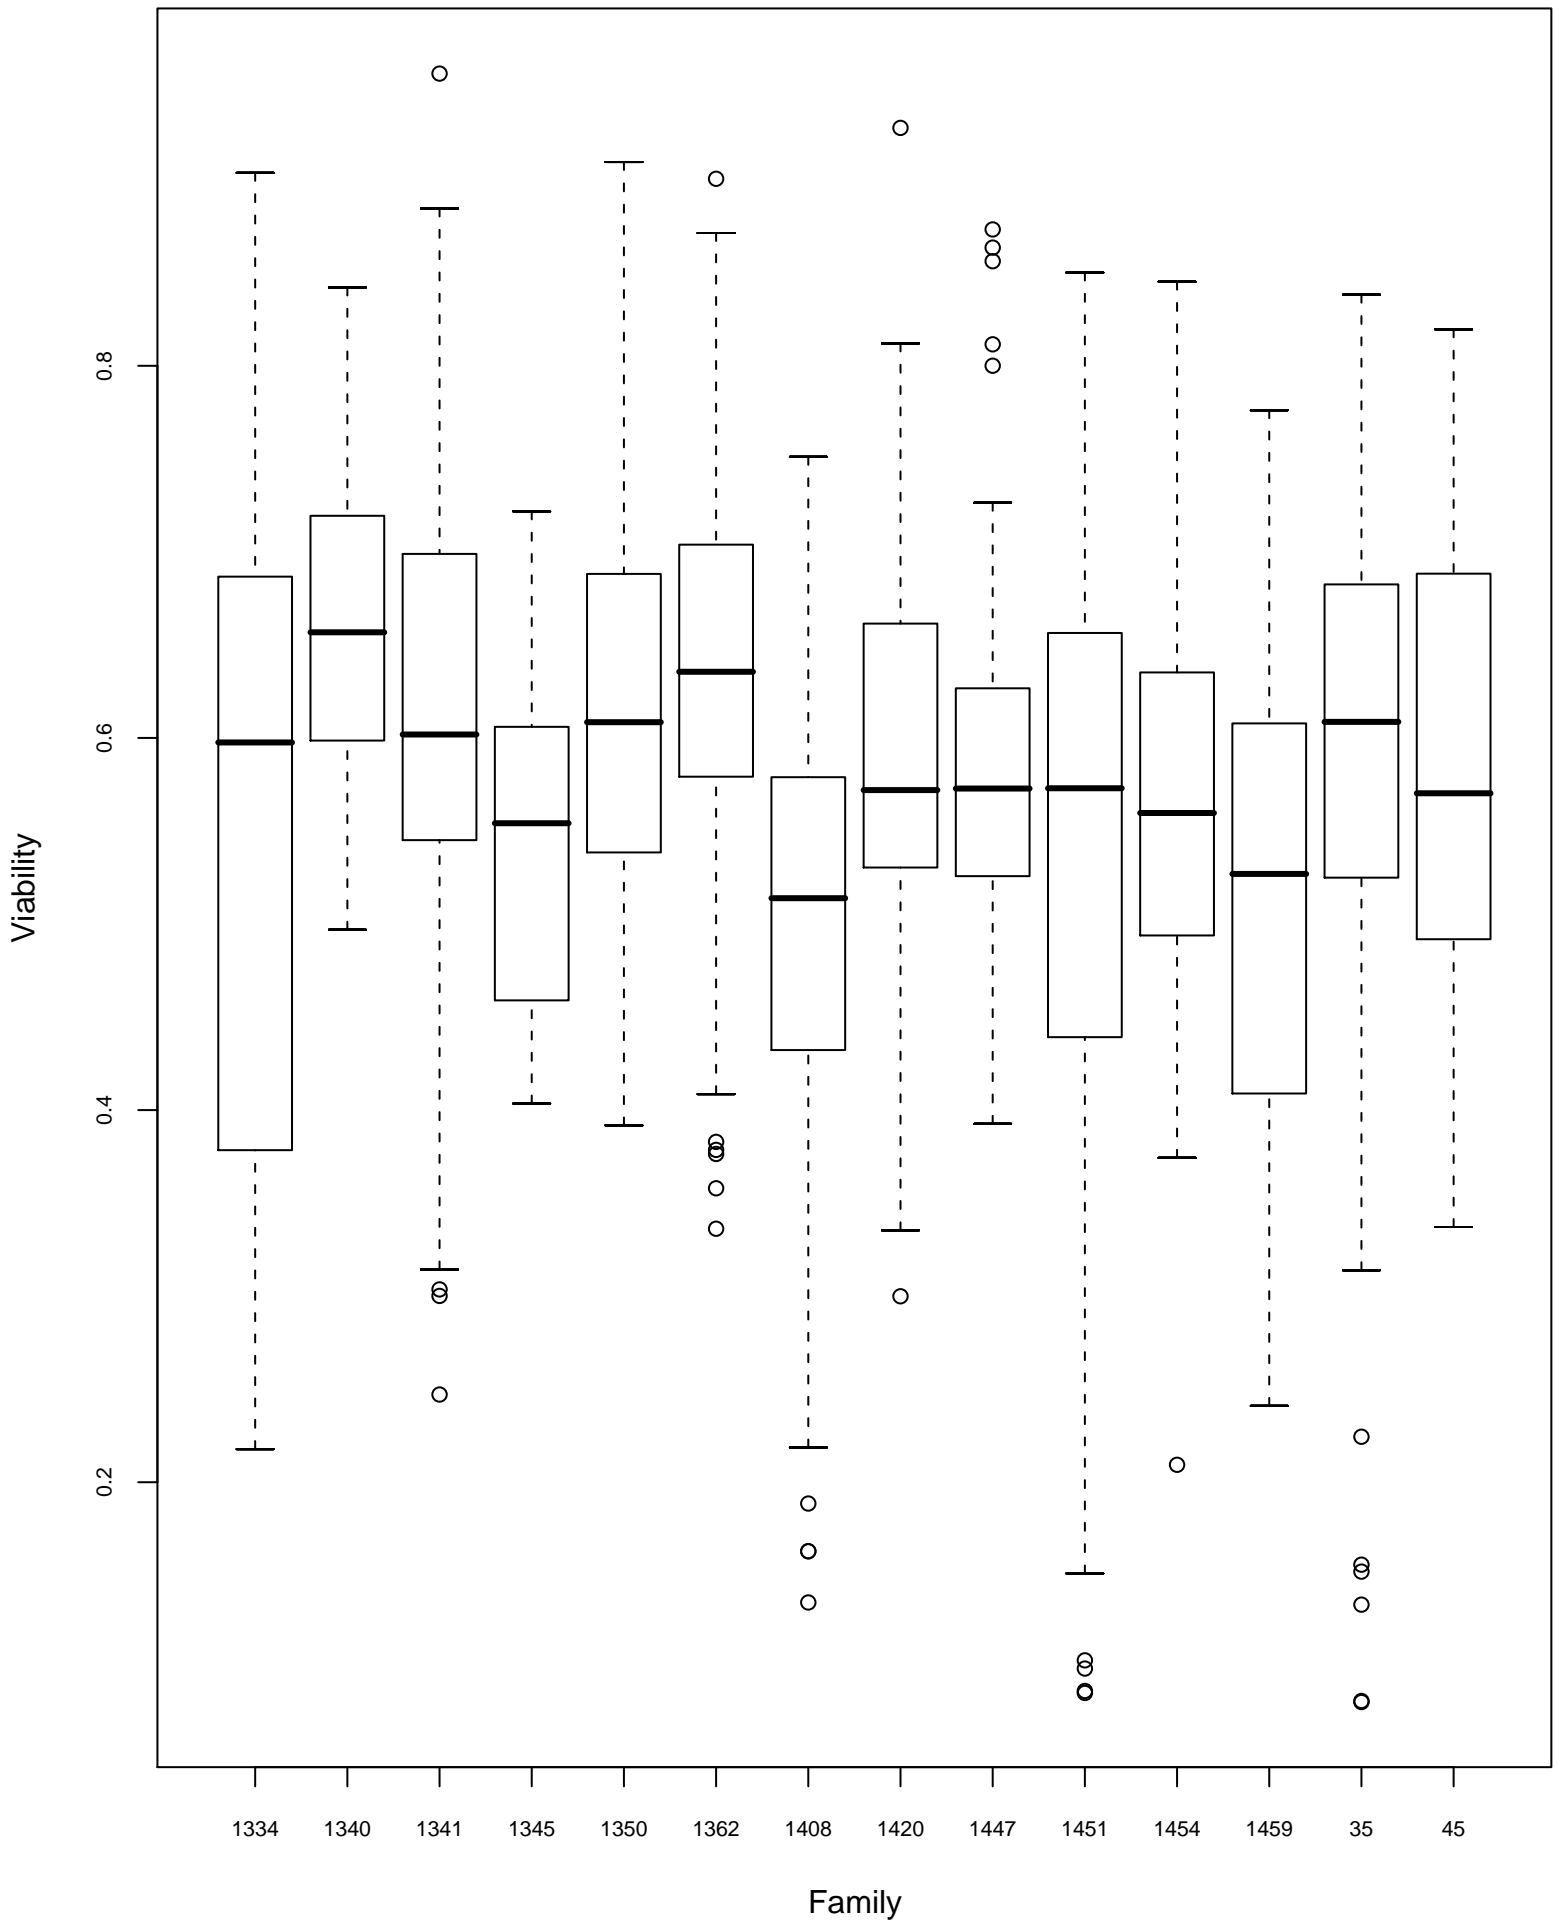

# Drug Ida, dose 1.23e-05 (mM)

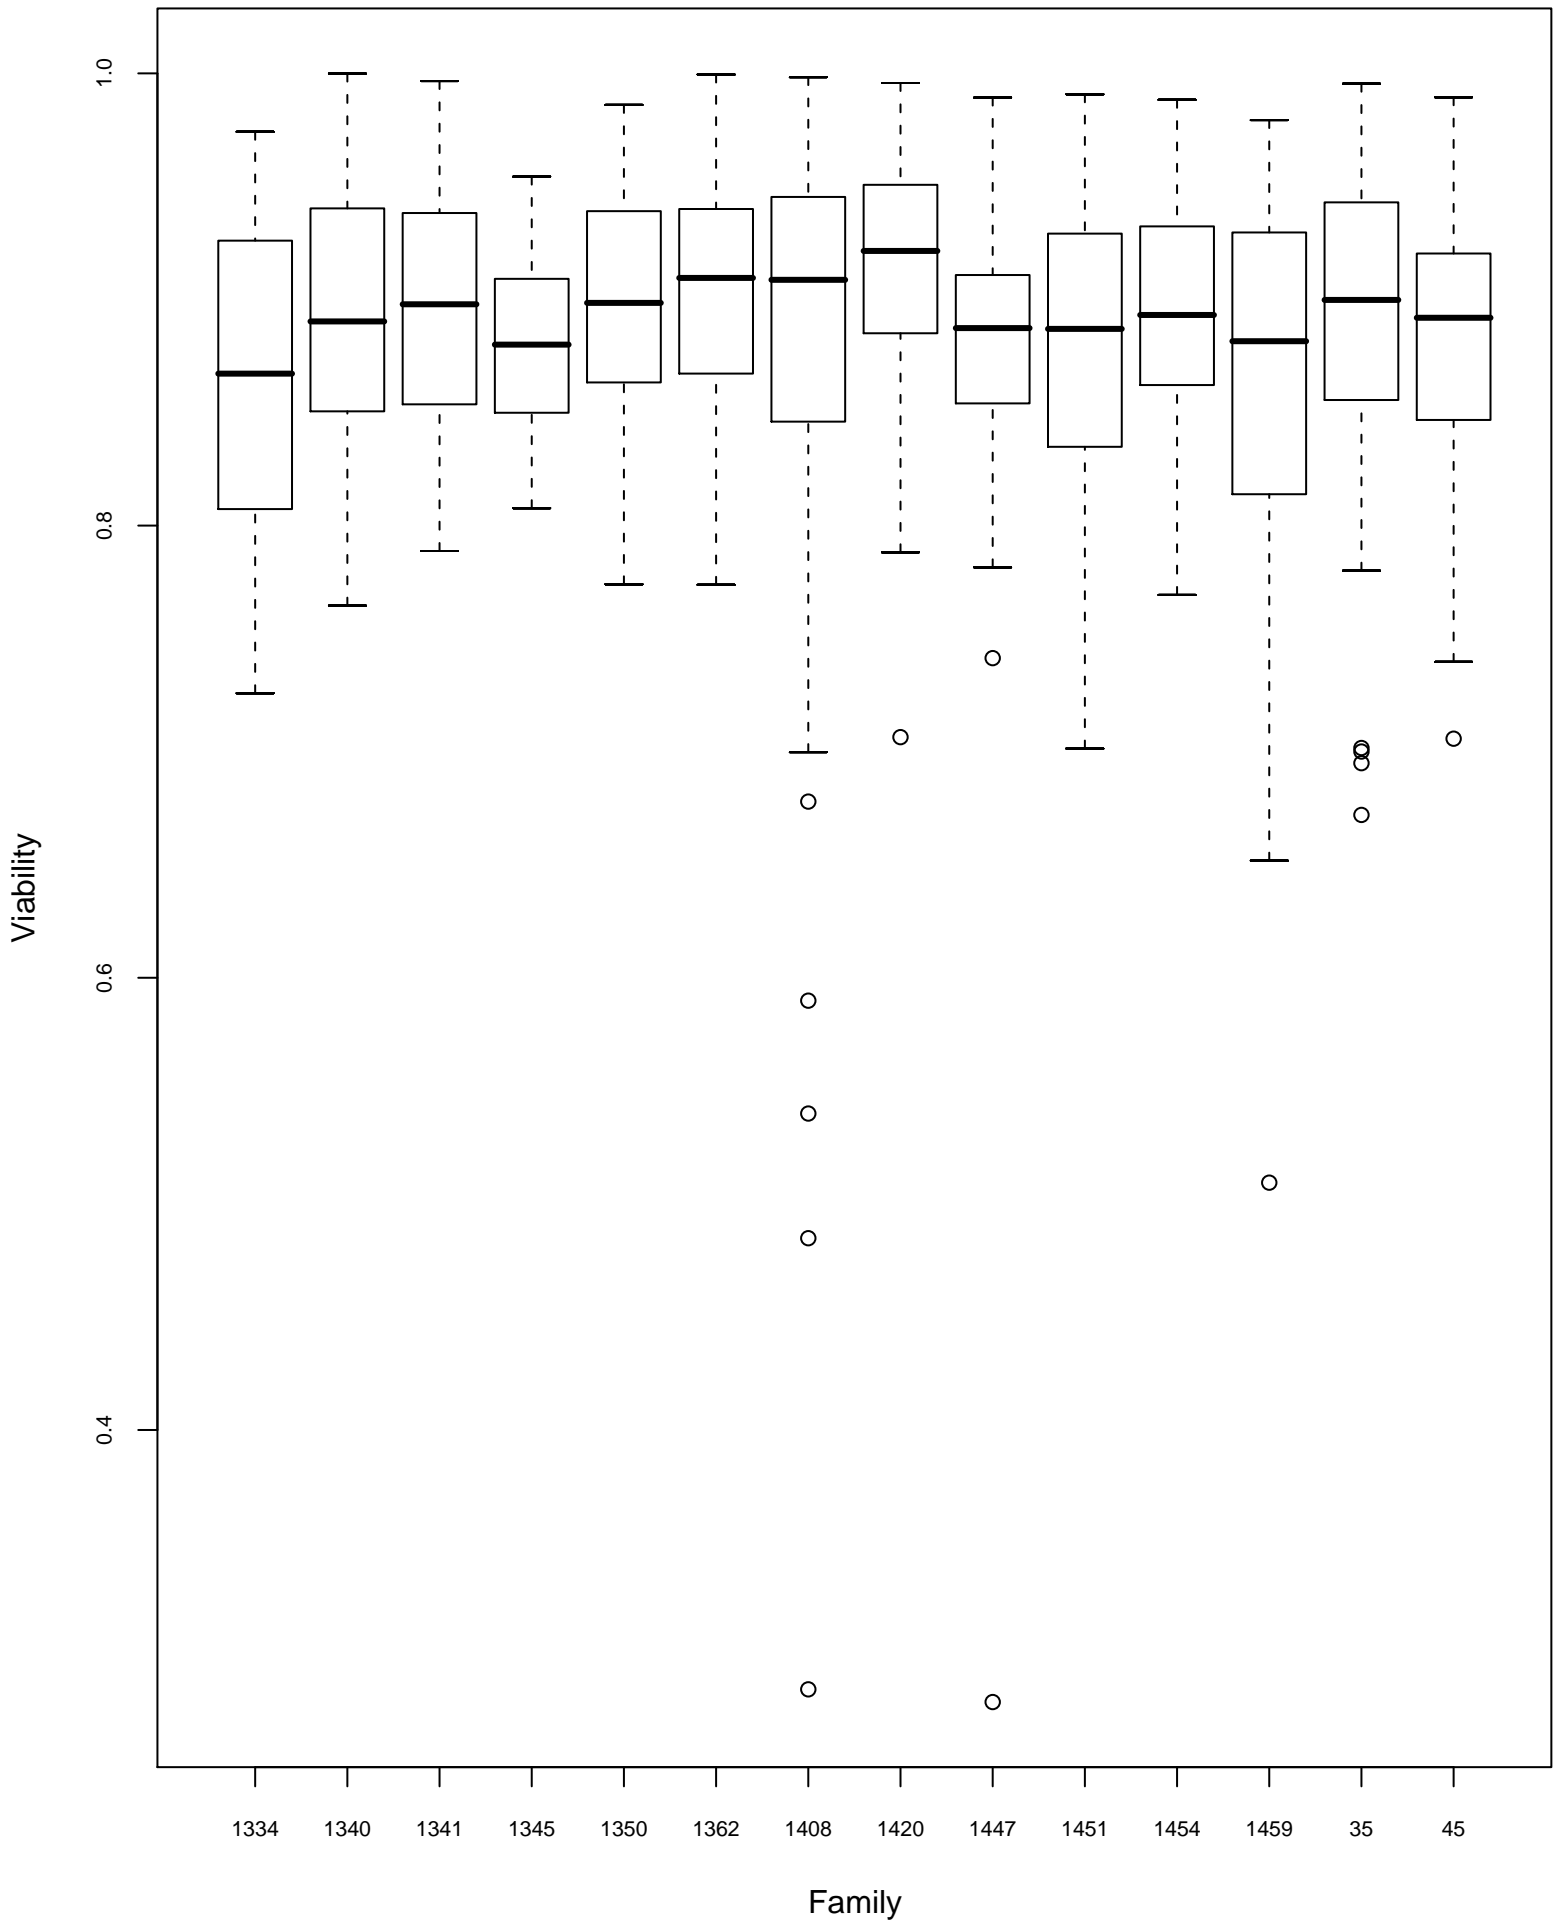

# Drug Ida, dose 5e-06 (mM)

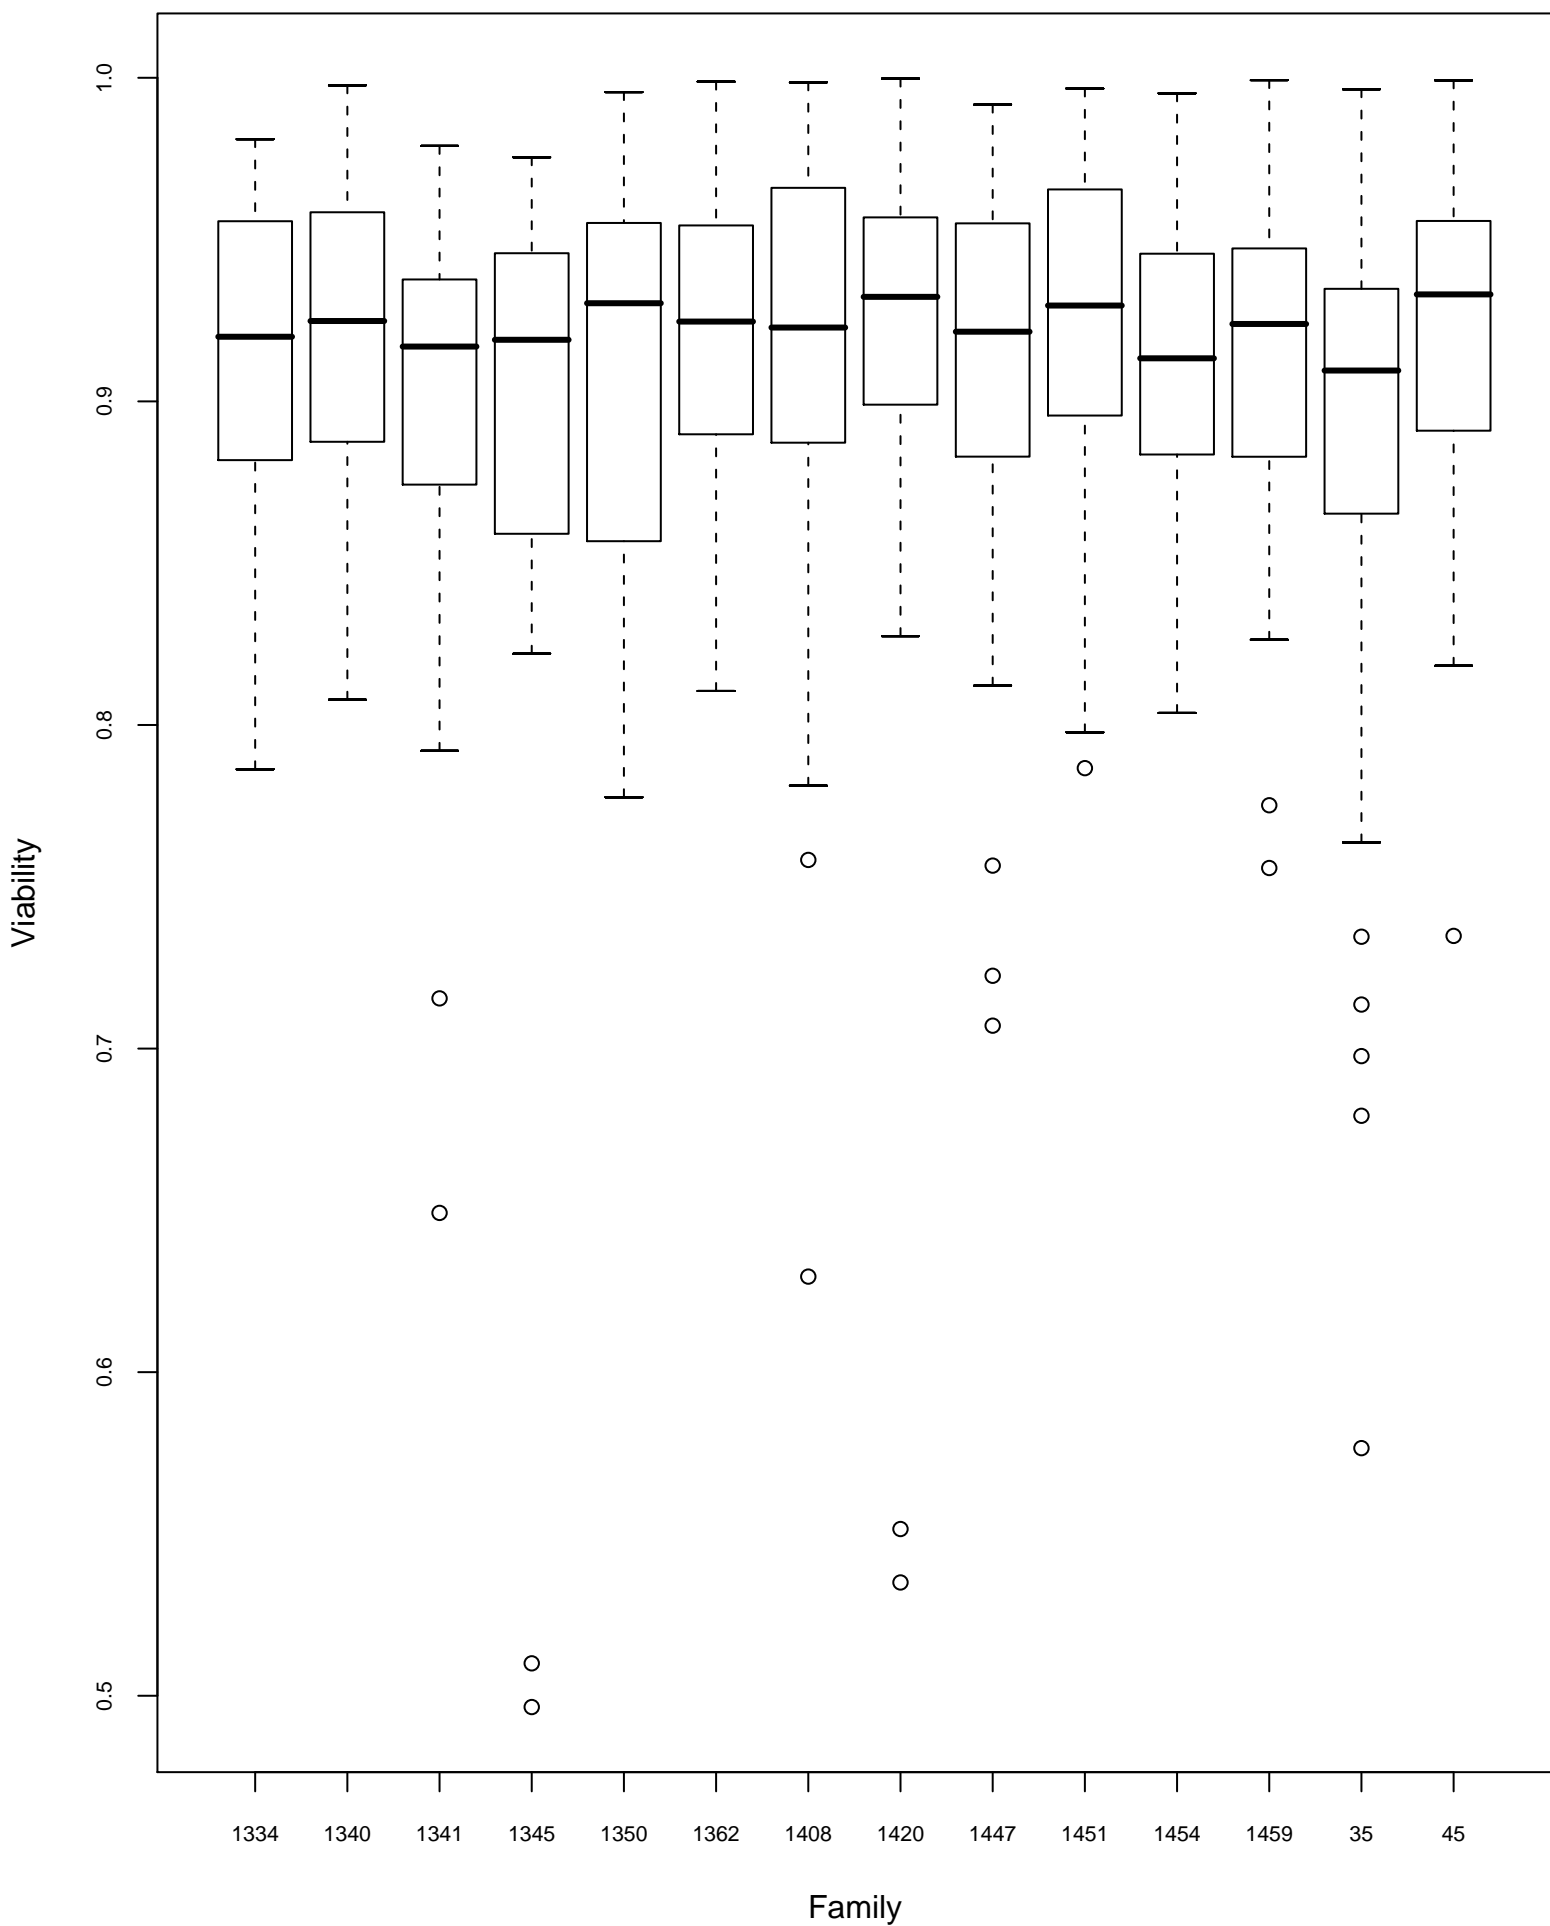



# Drug Mitom, dose 0.0003 (mM)

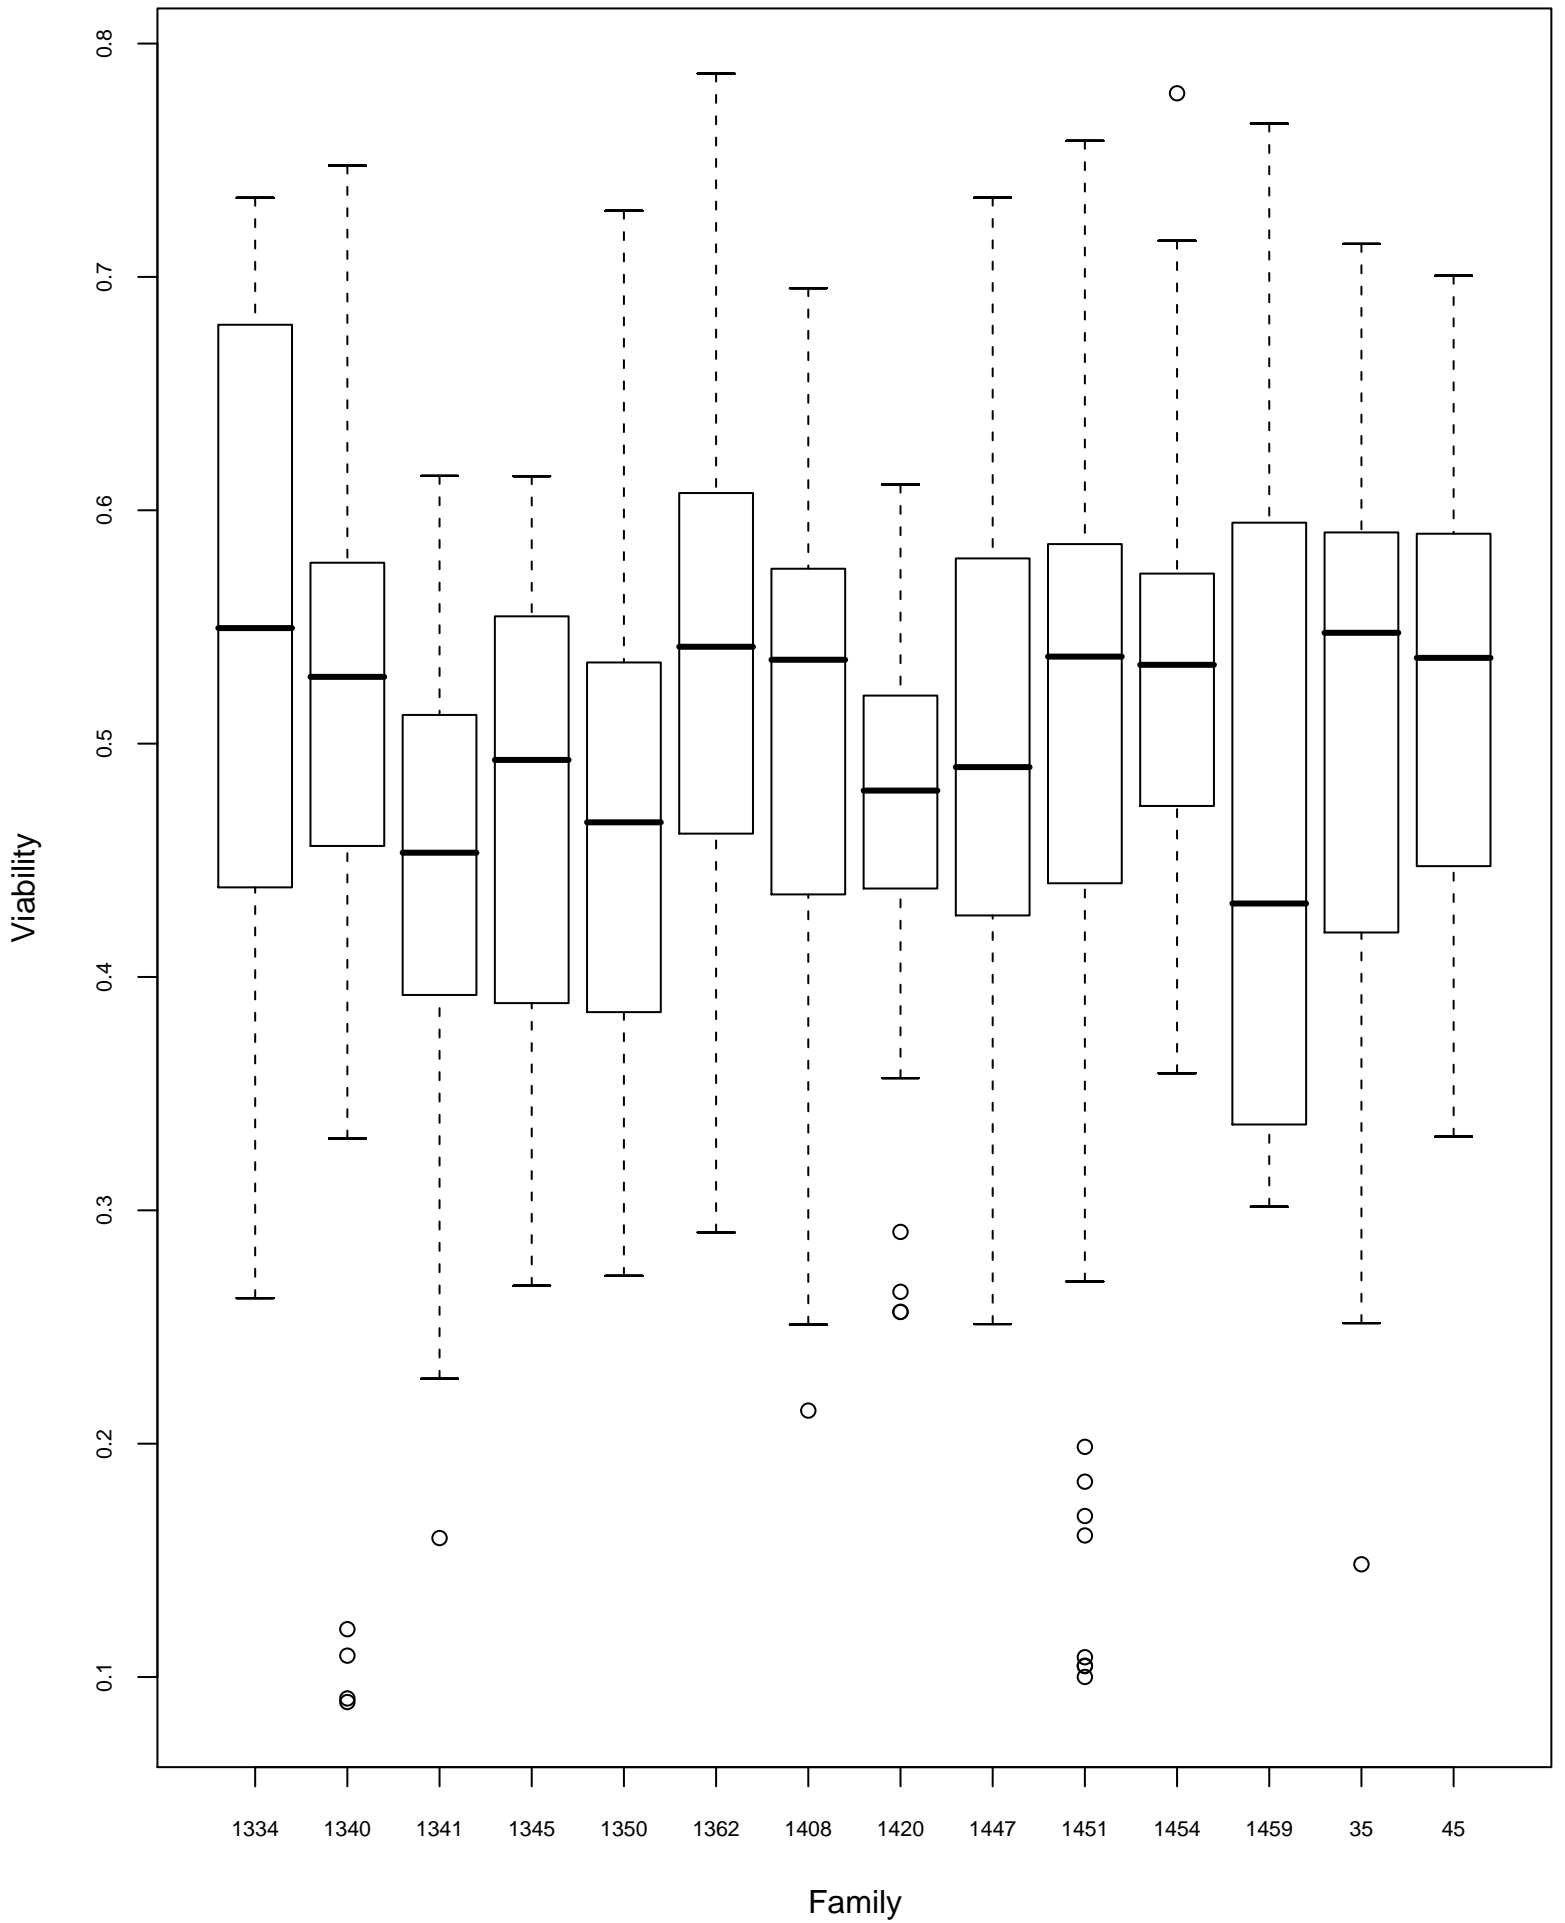

# Drug Mitom, dose 0.0001 (mM)

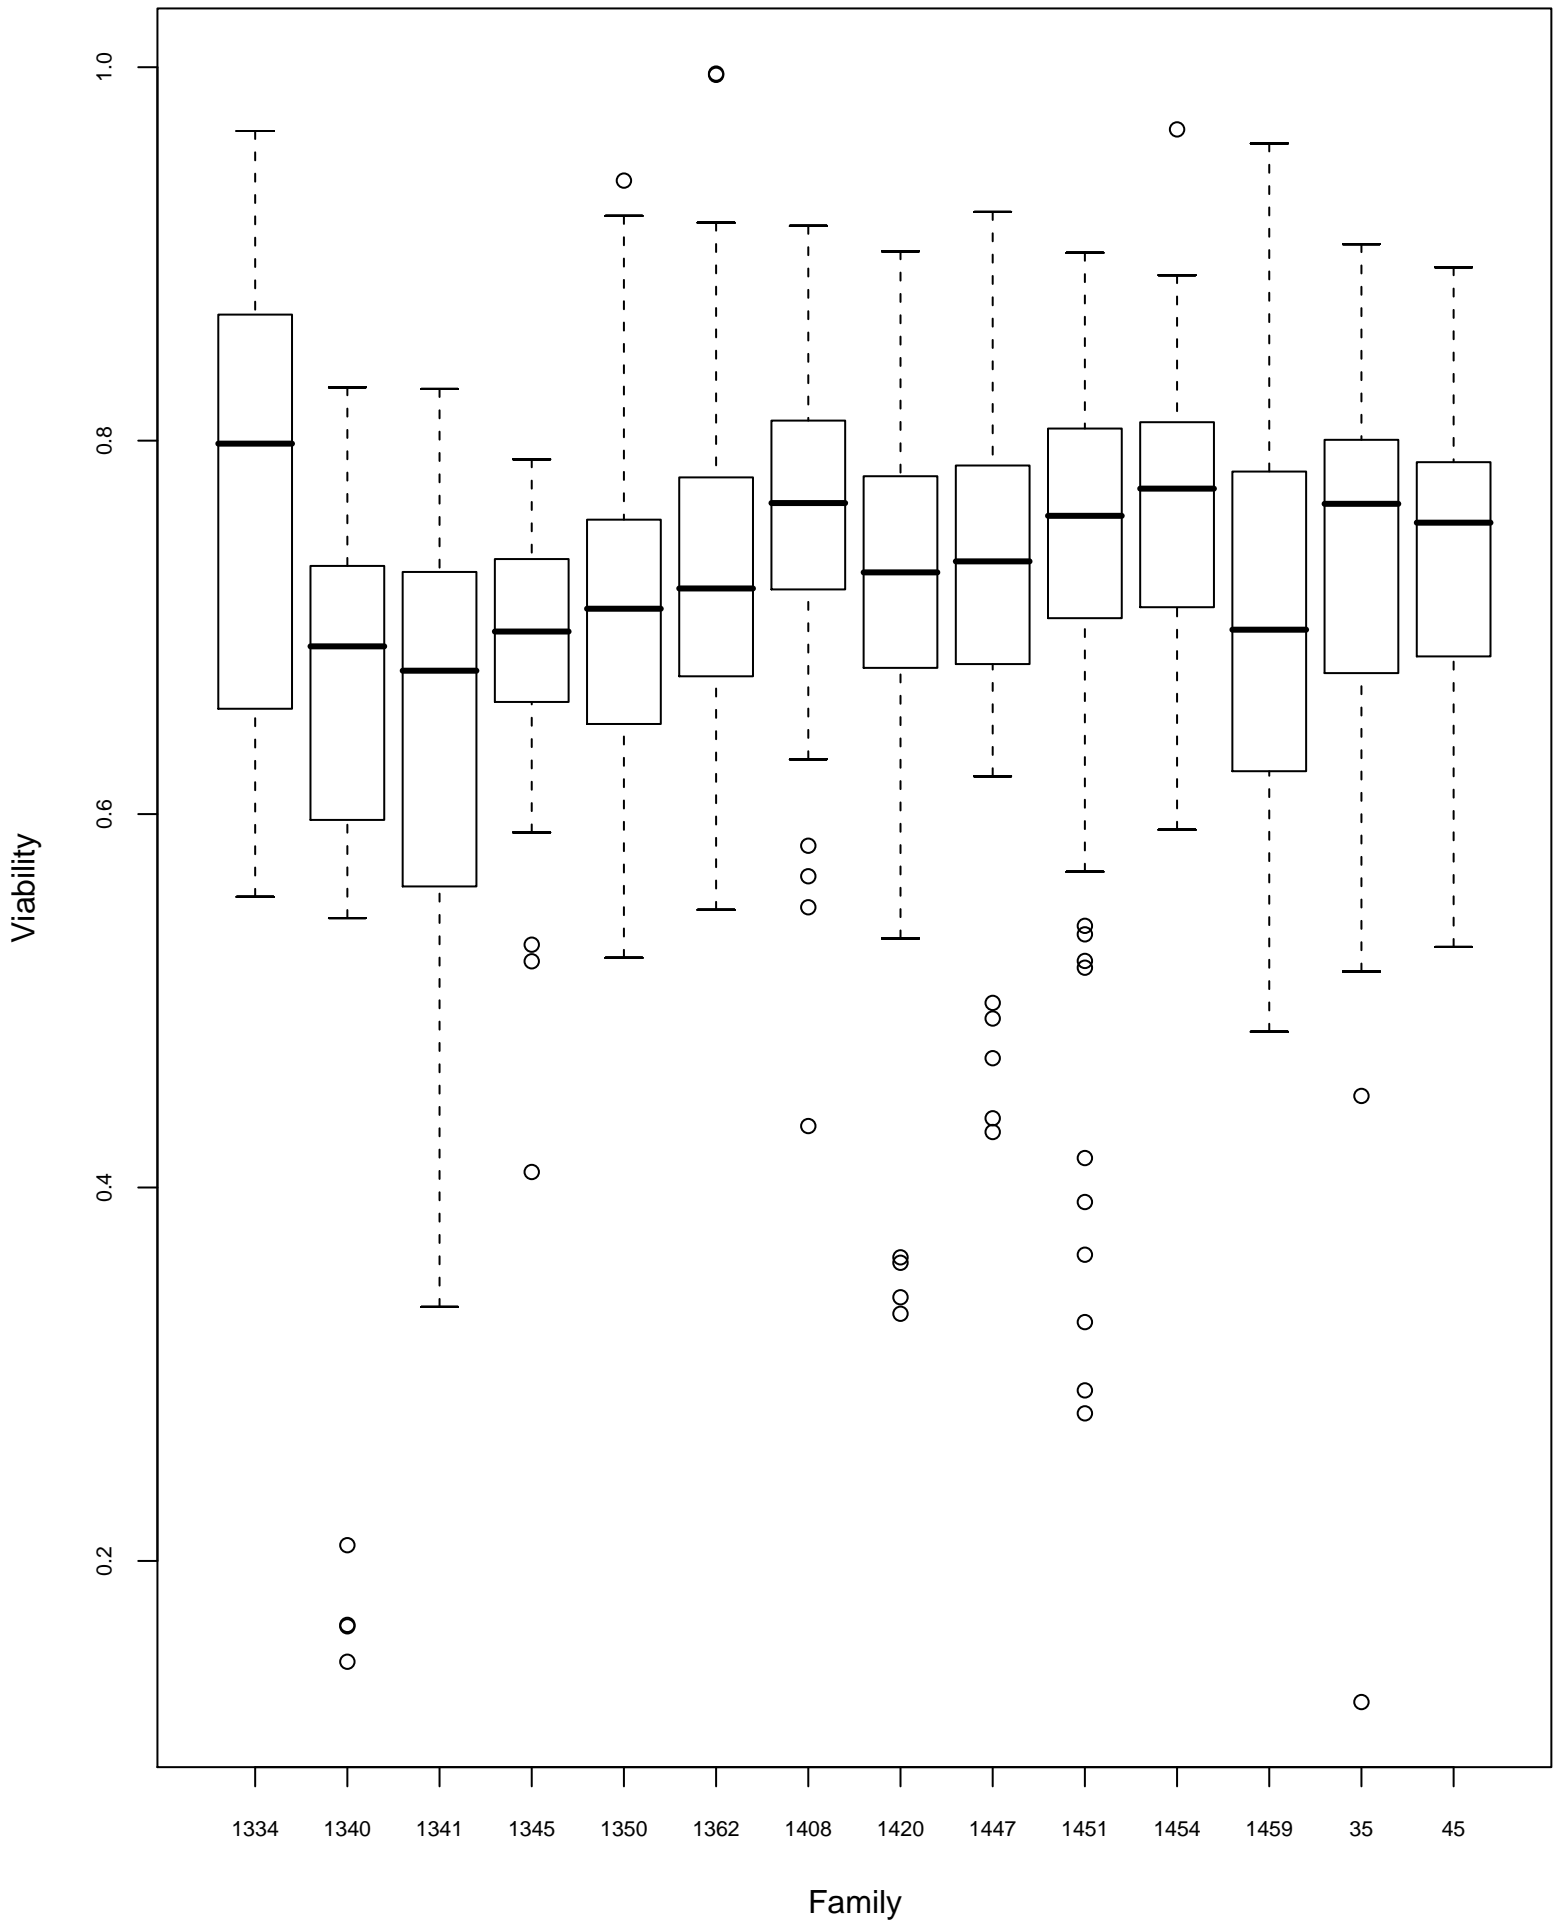

# Drug Mitom, dose 3.33e-05 (mM)

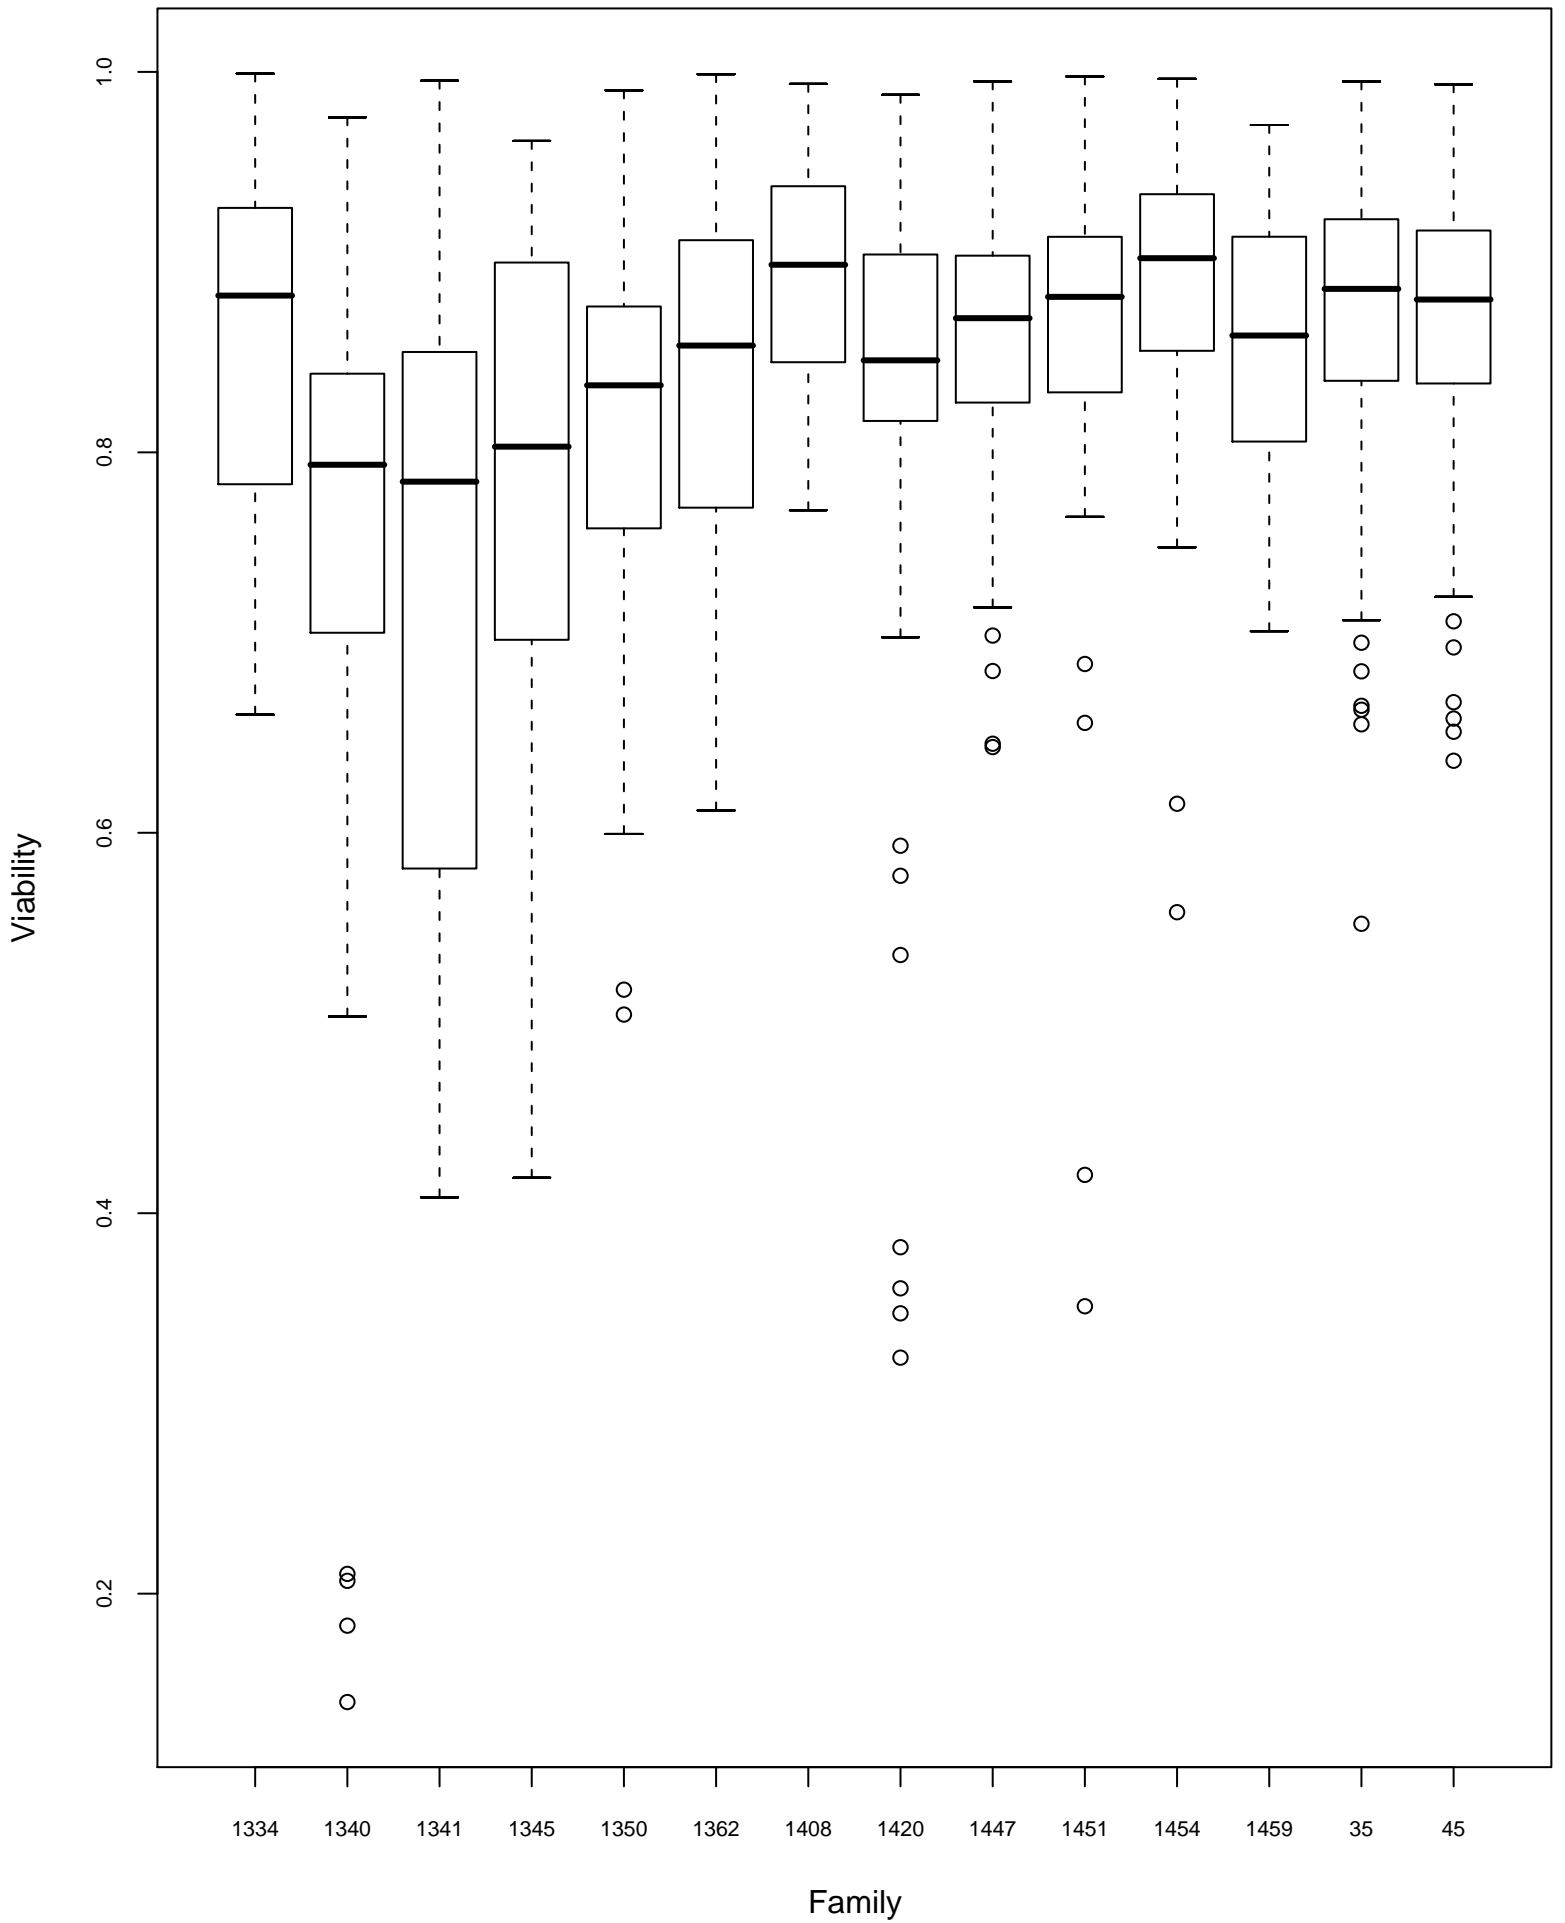

# Drug Mitom, dose 1.11e-05 (mM)

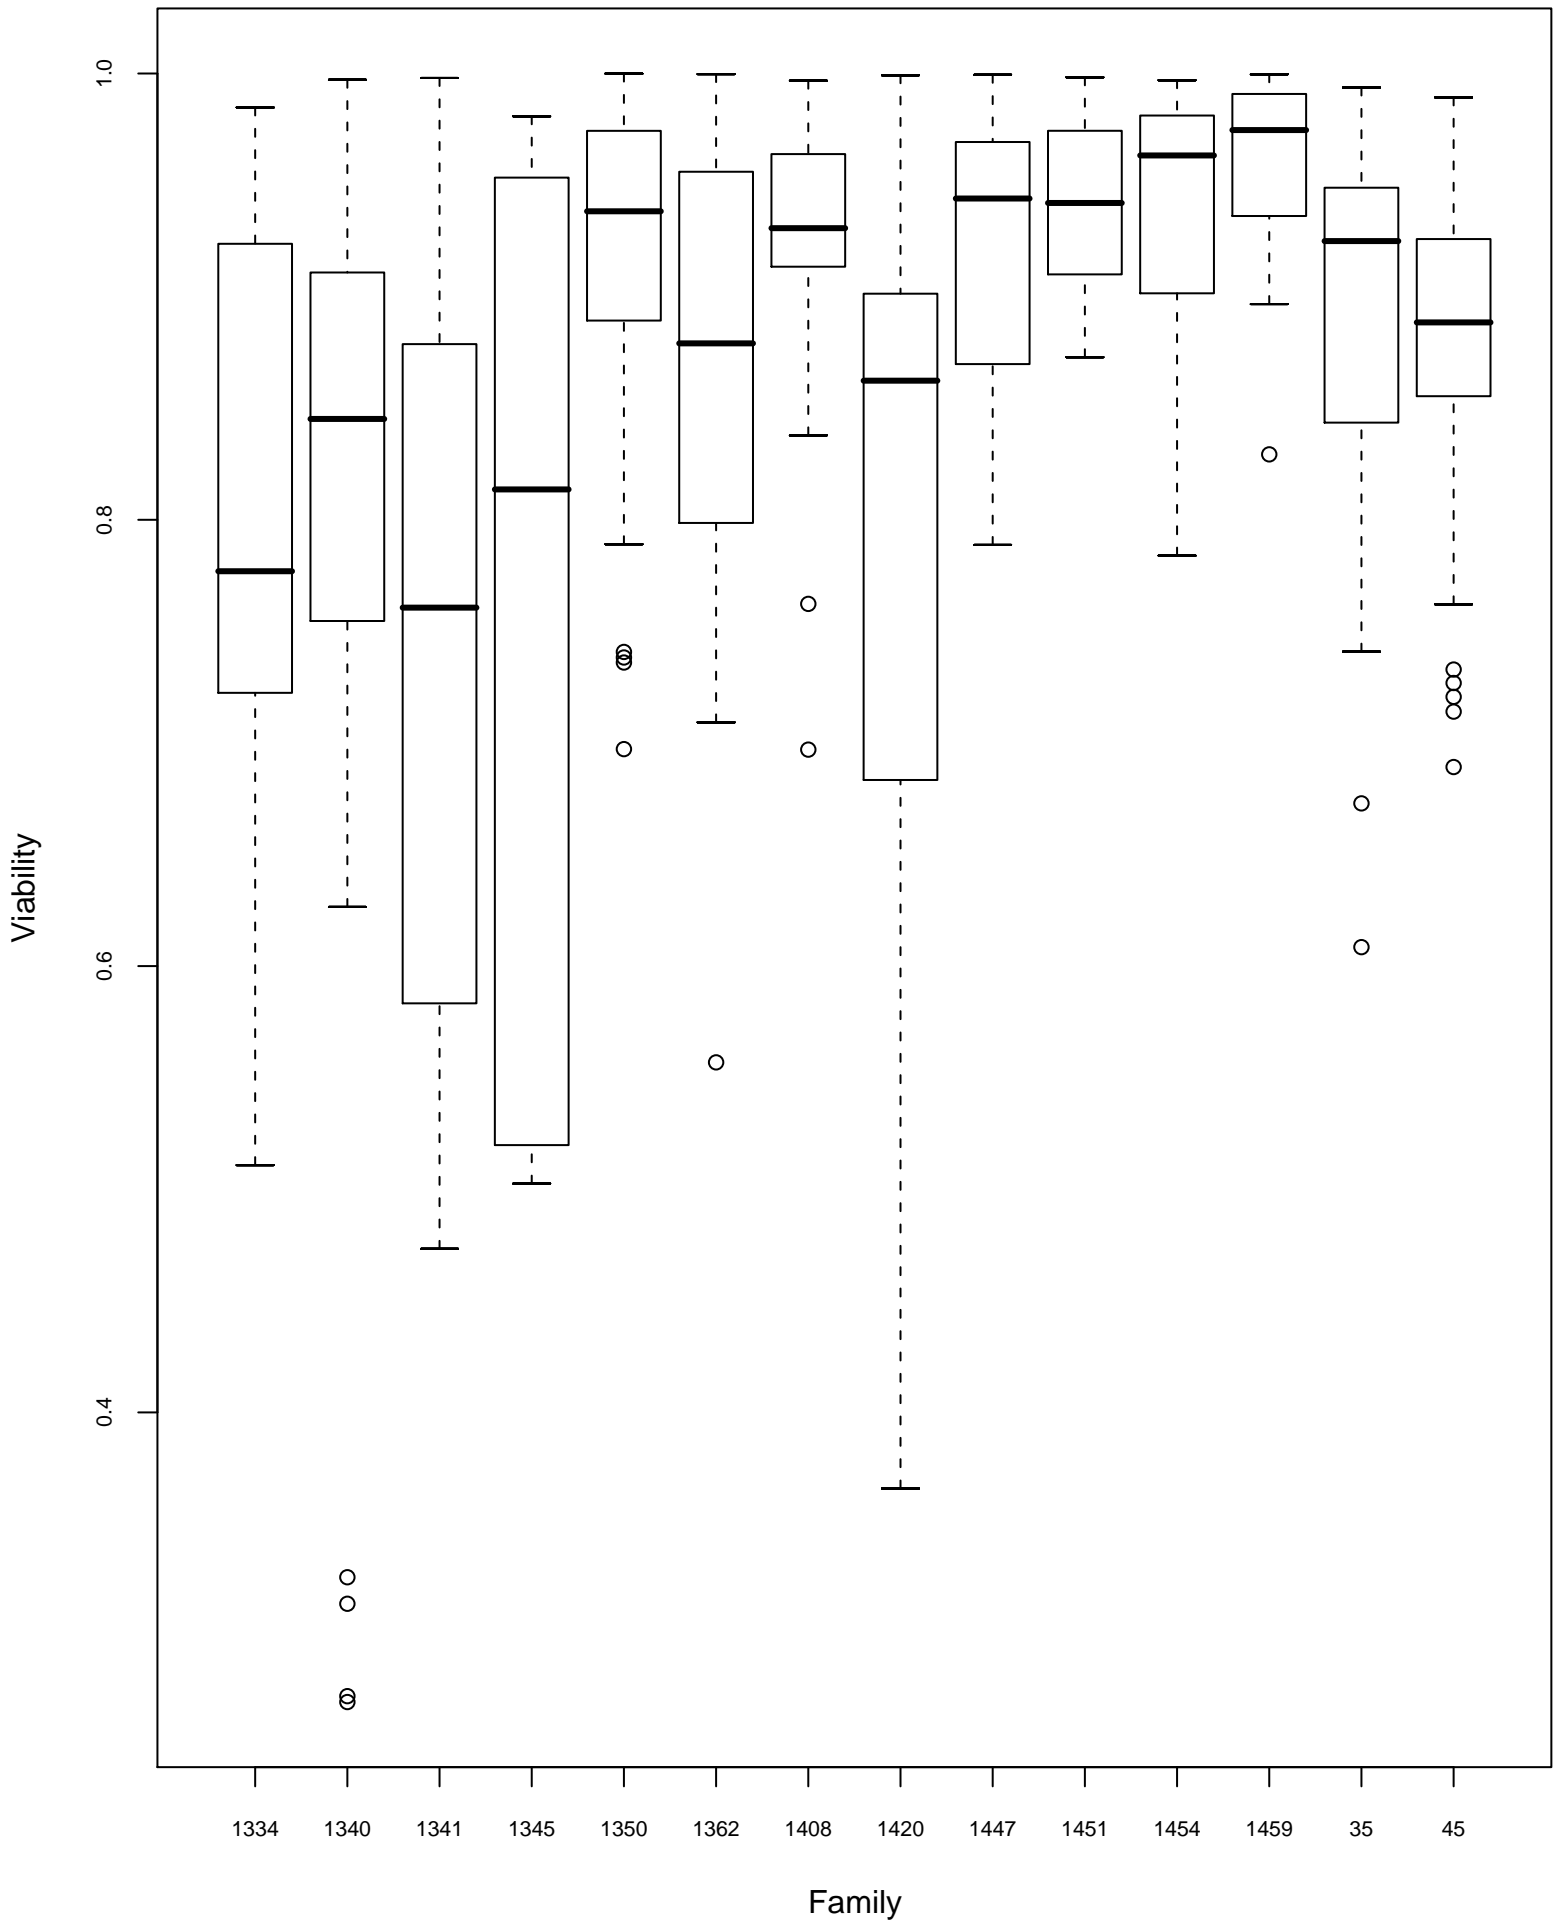

# Drug Mitox, dose 0.0001 (mM)

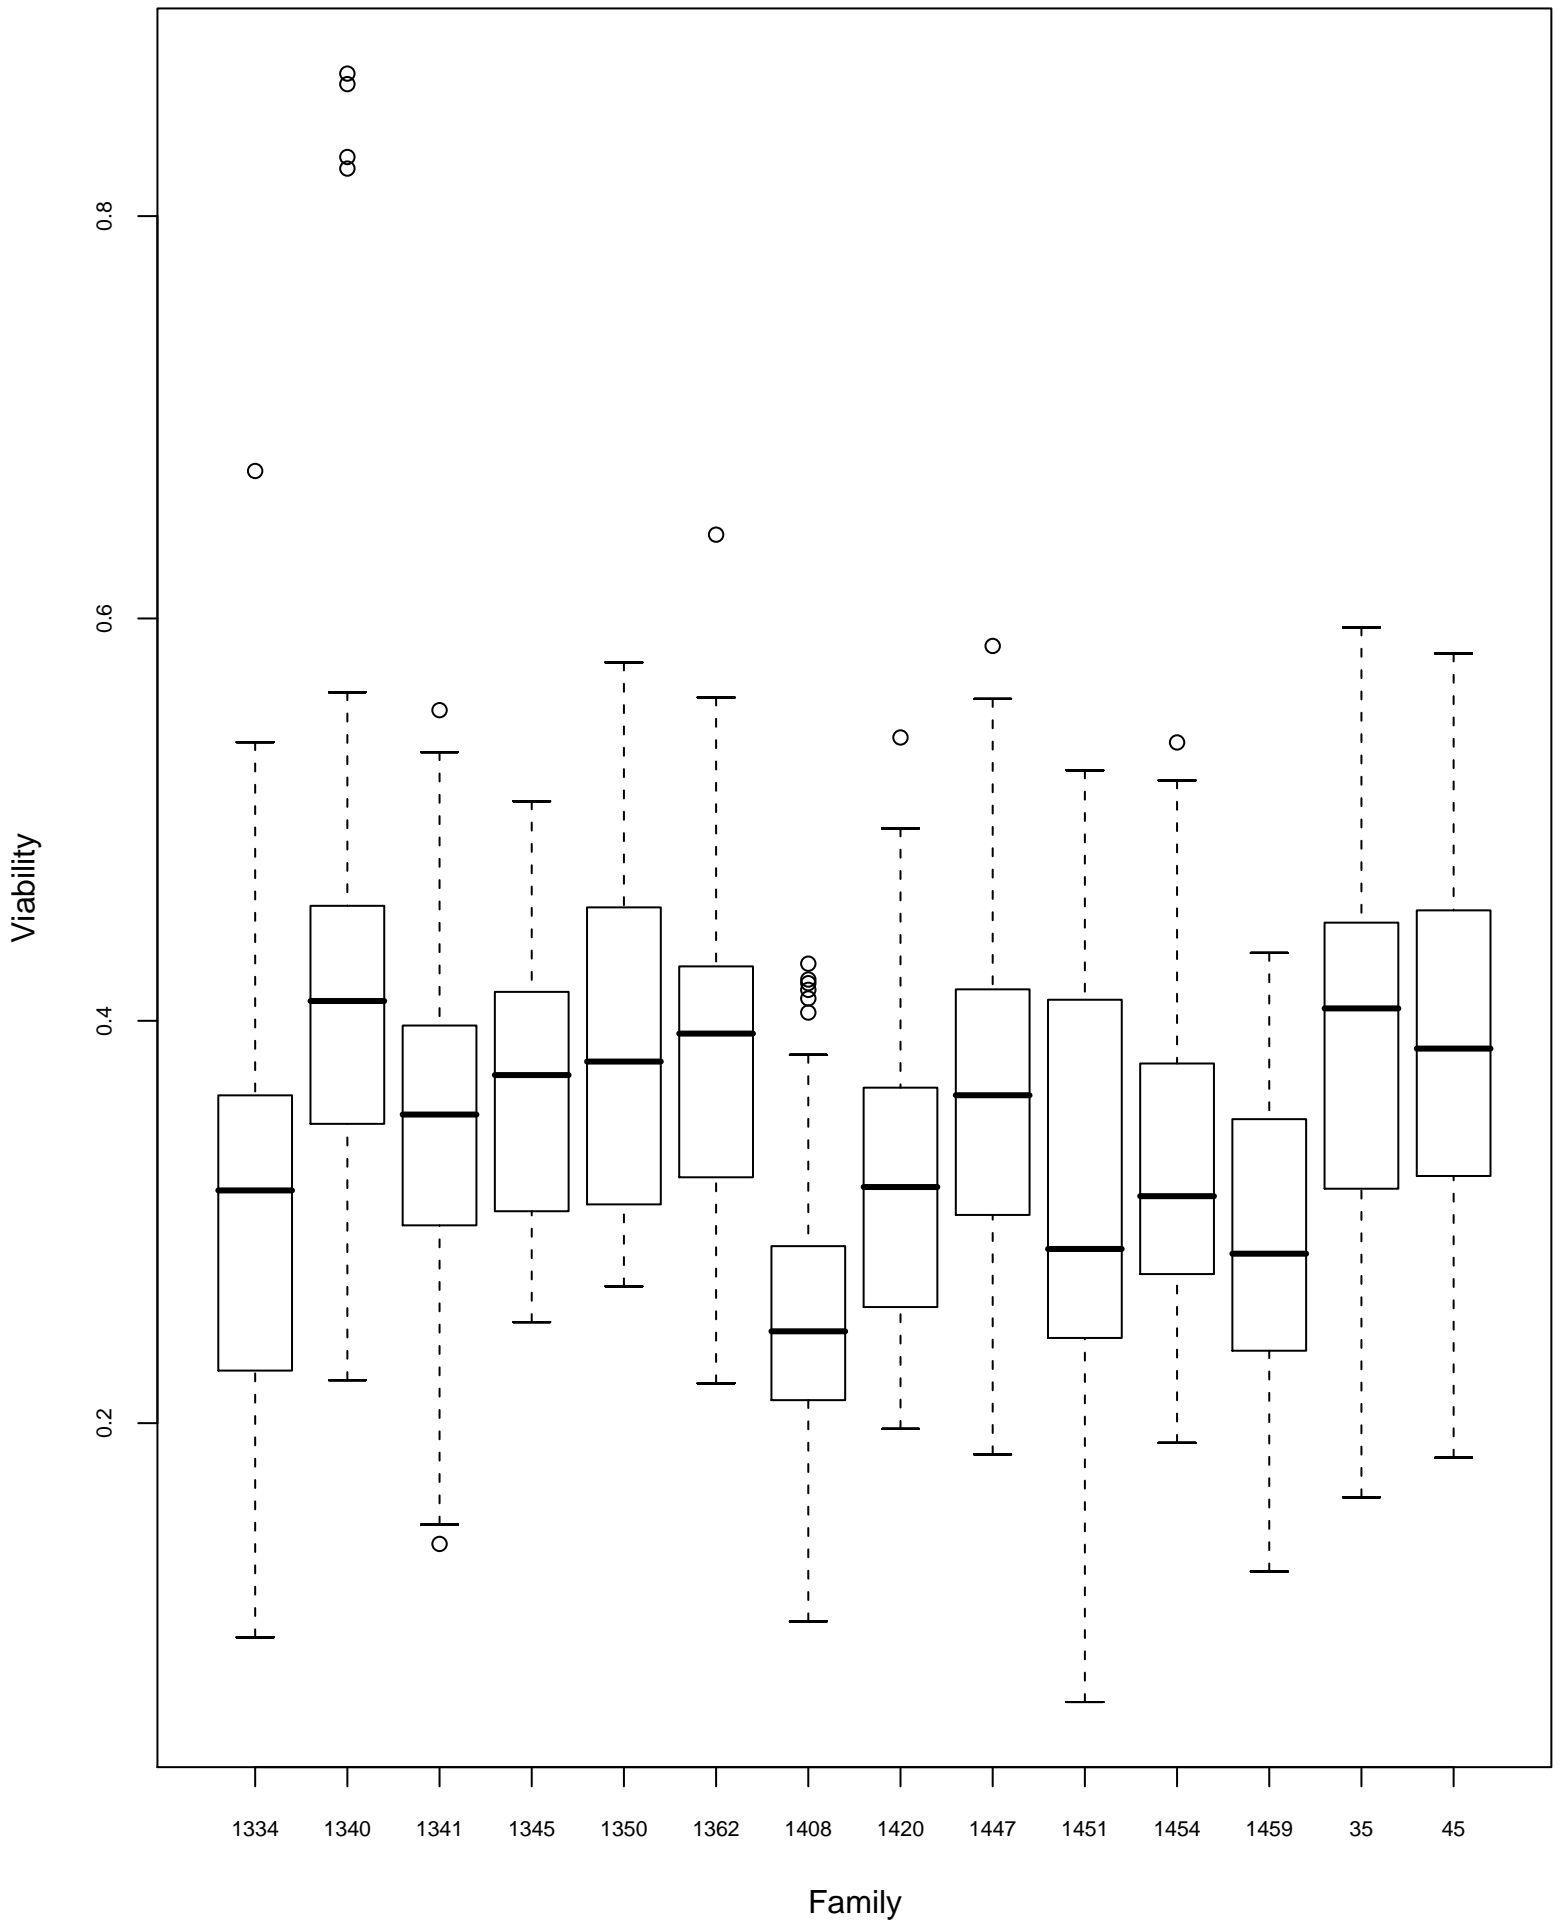

# Drug Mitox, dose 3.33e-05 (mM)

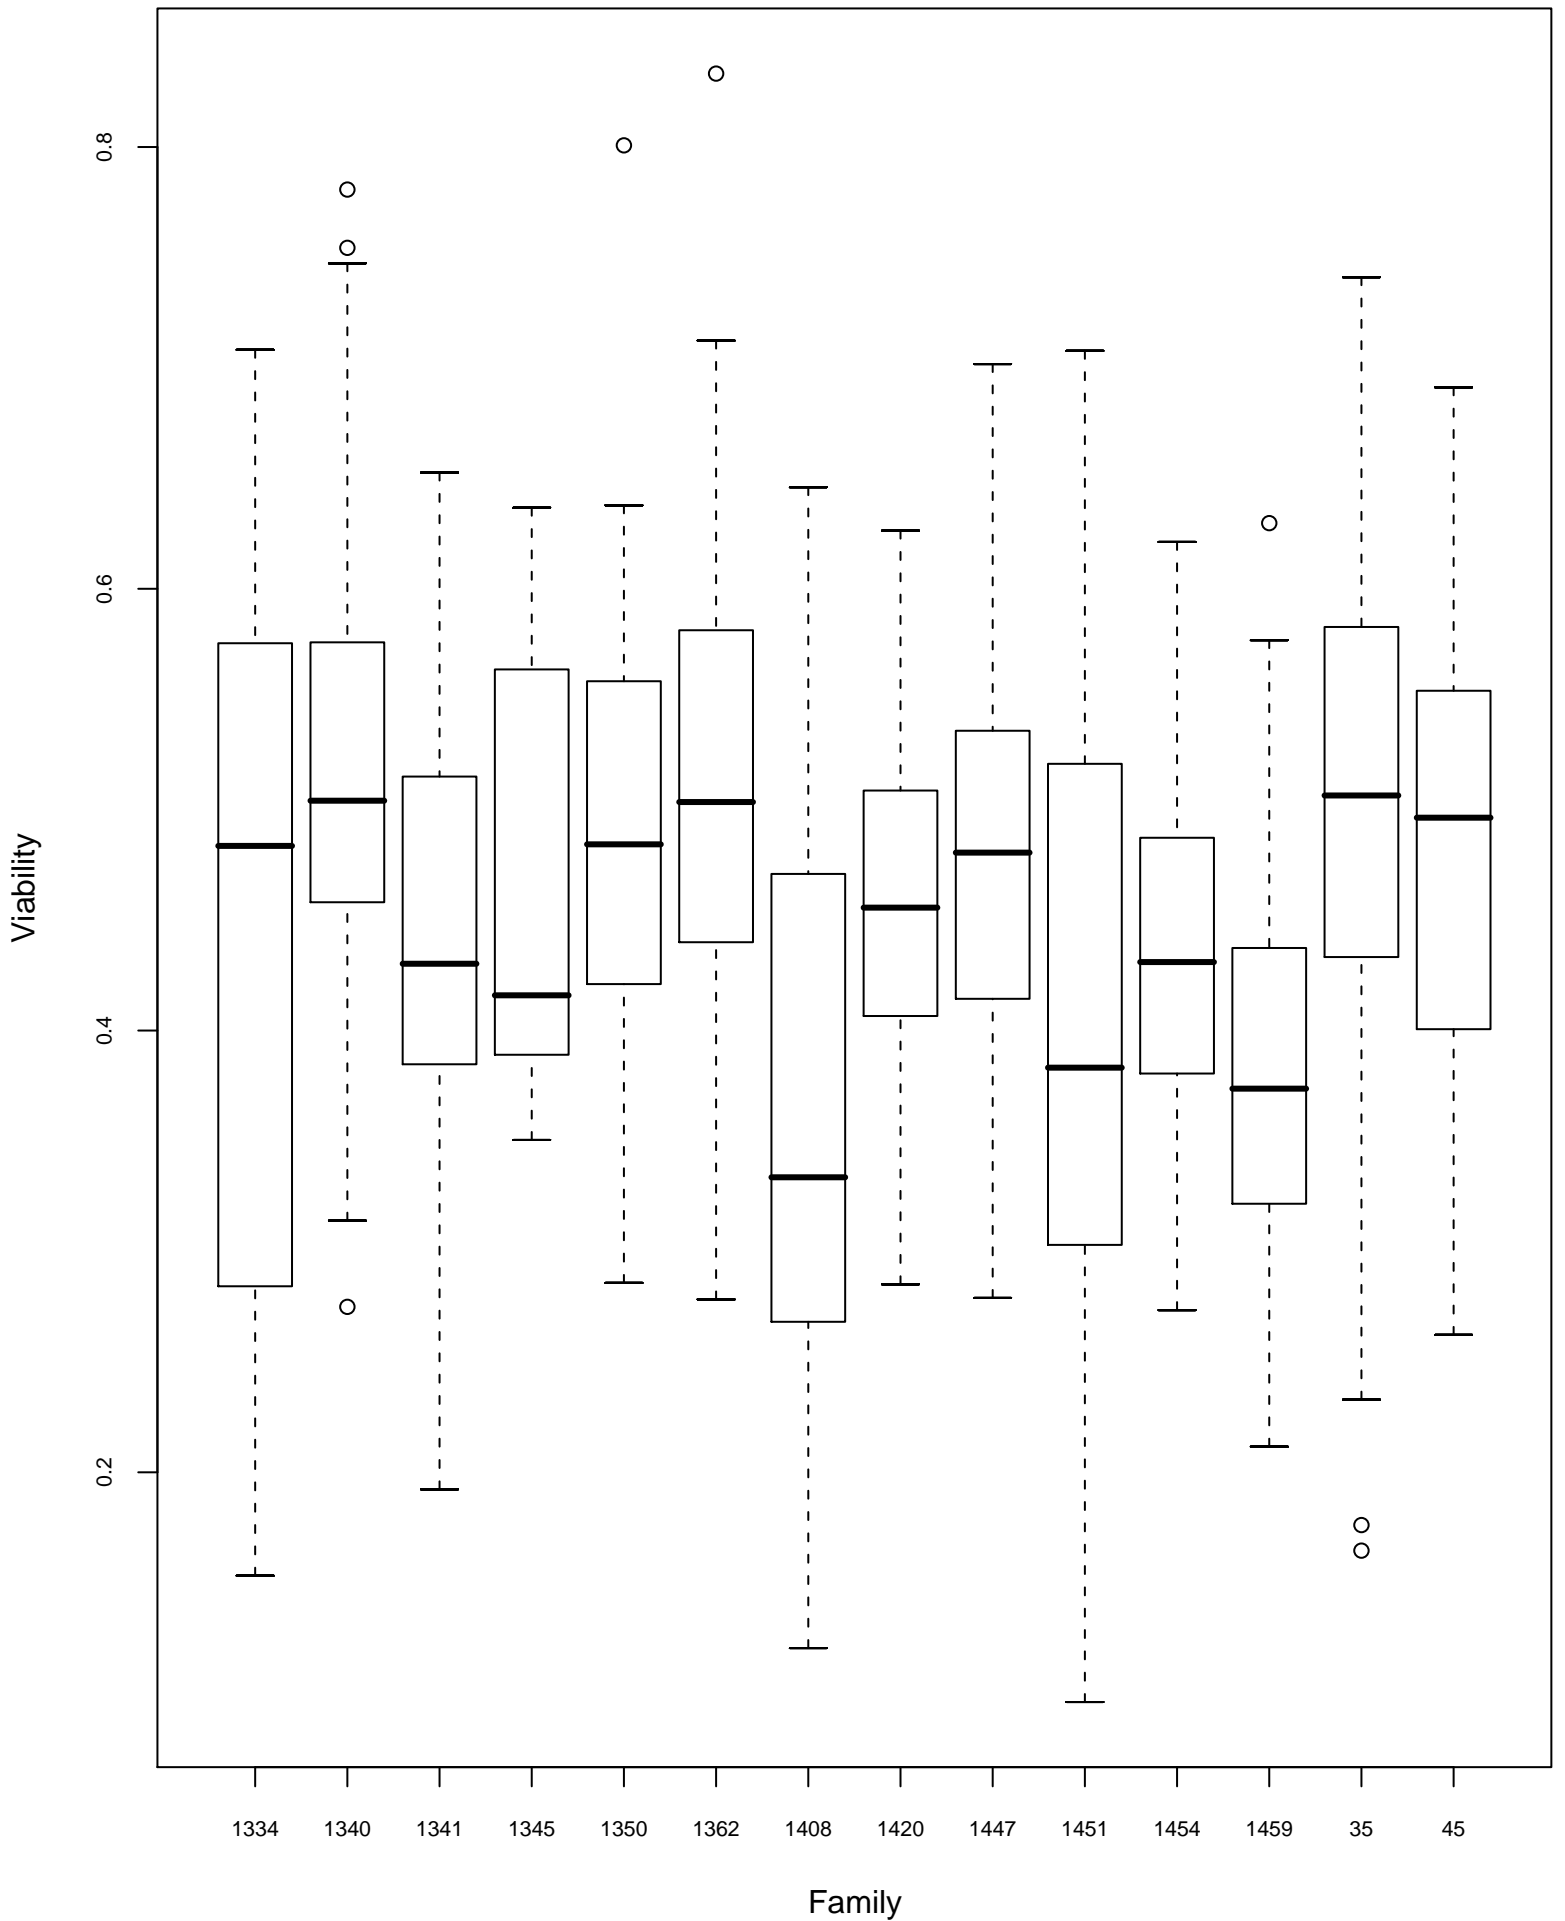

# Drug Mitox, dose 1.11e-05 (mM)

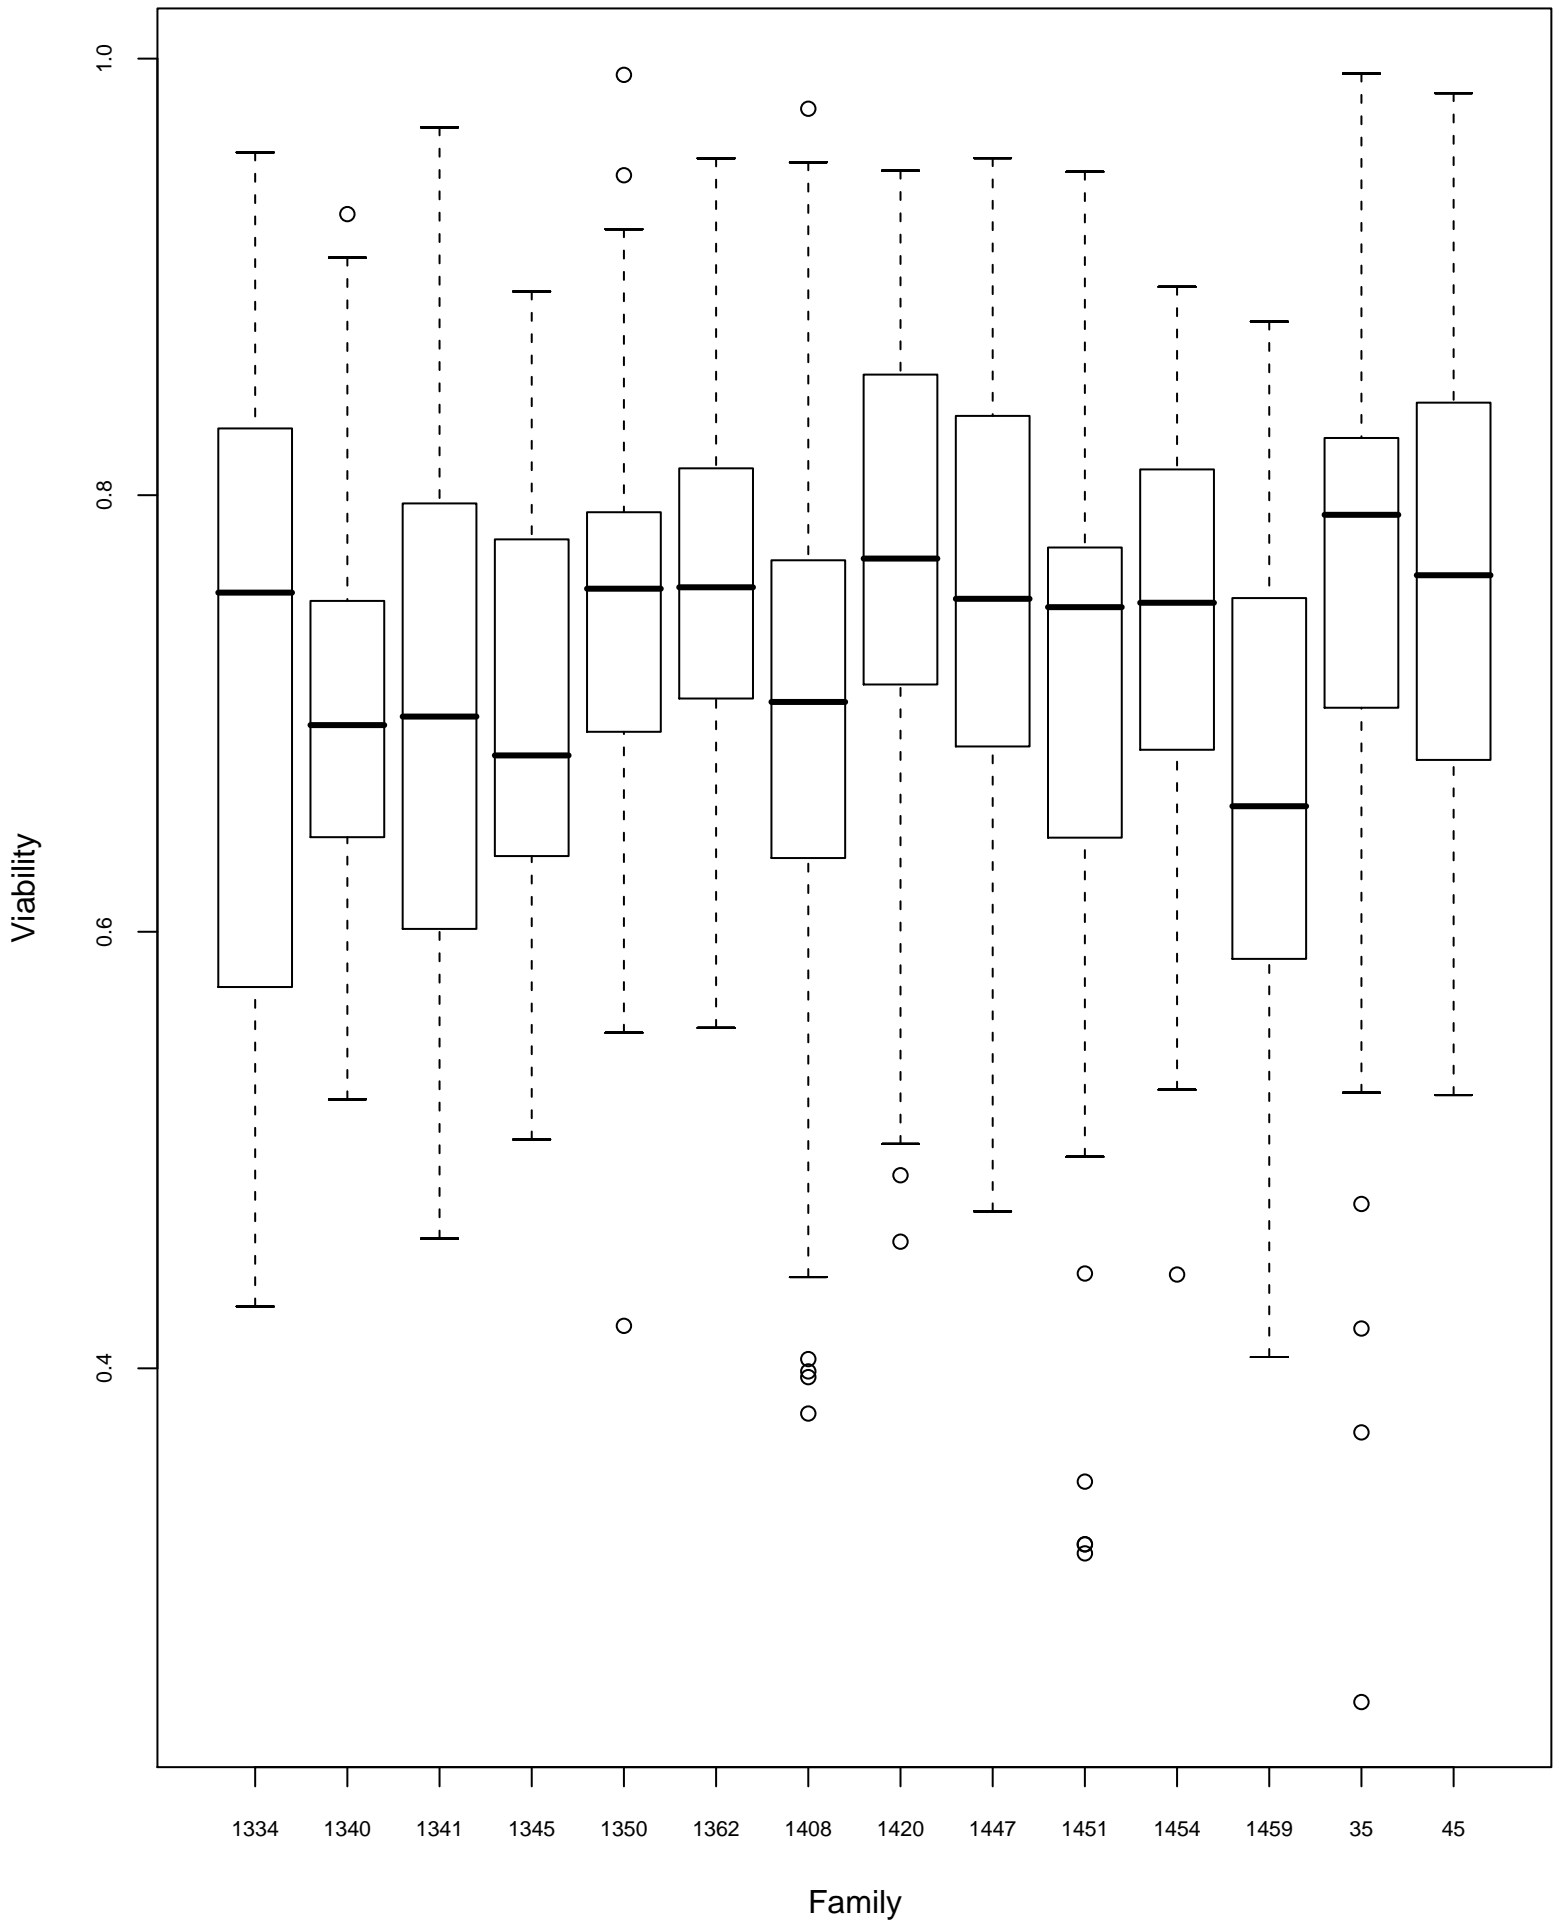

# Drug Mitox, dose 3.7e-06 (mM)

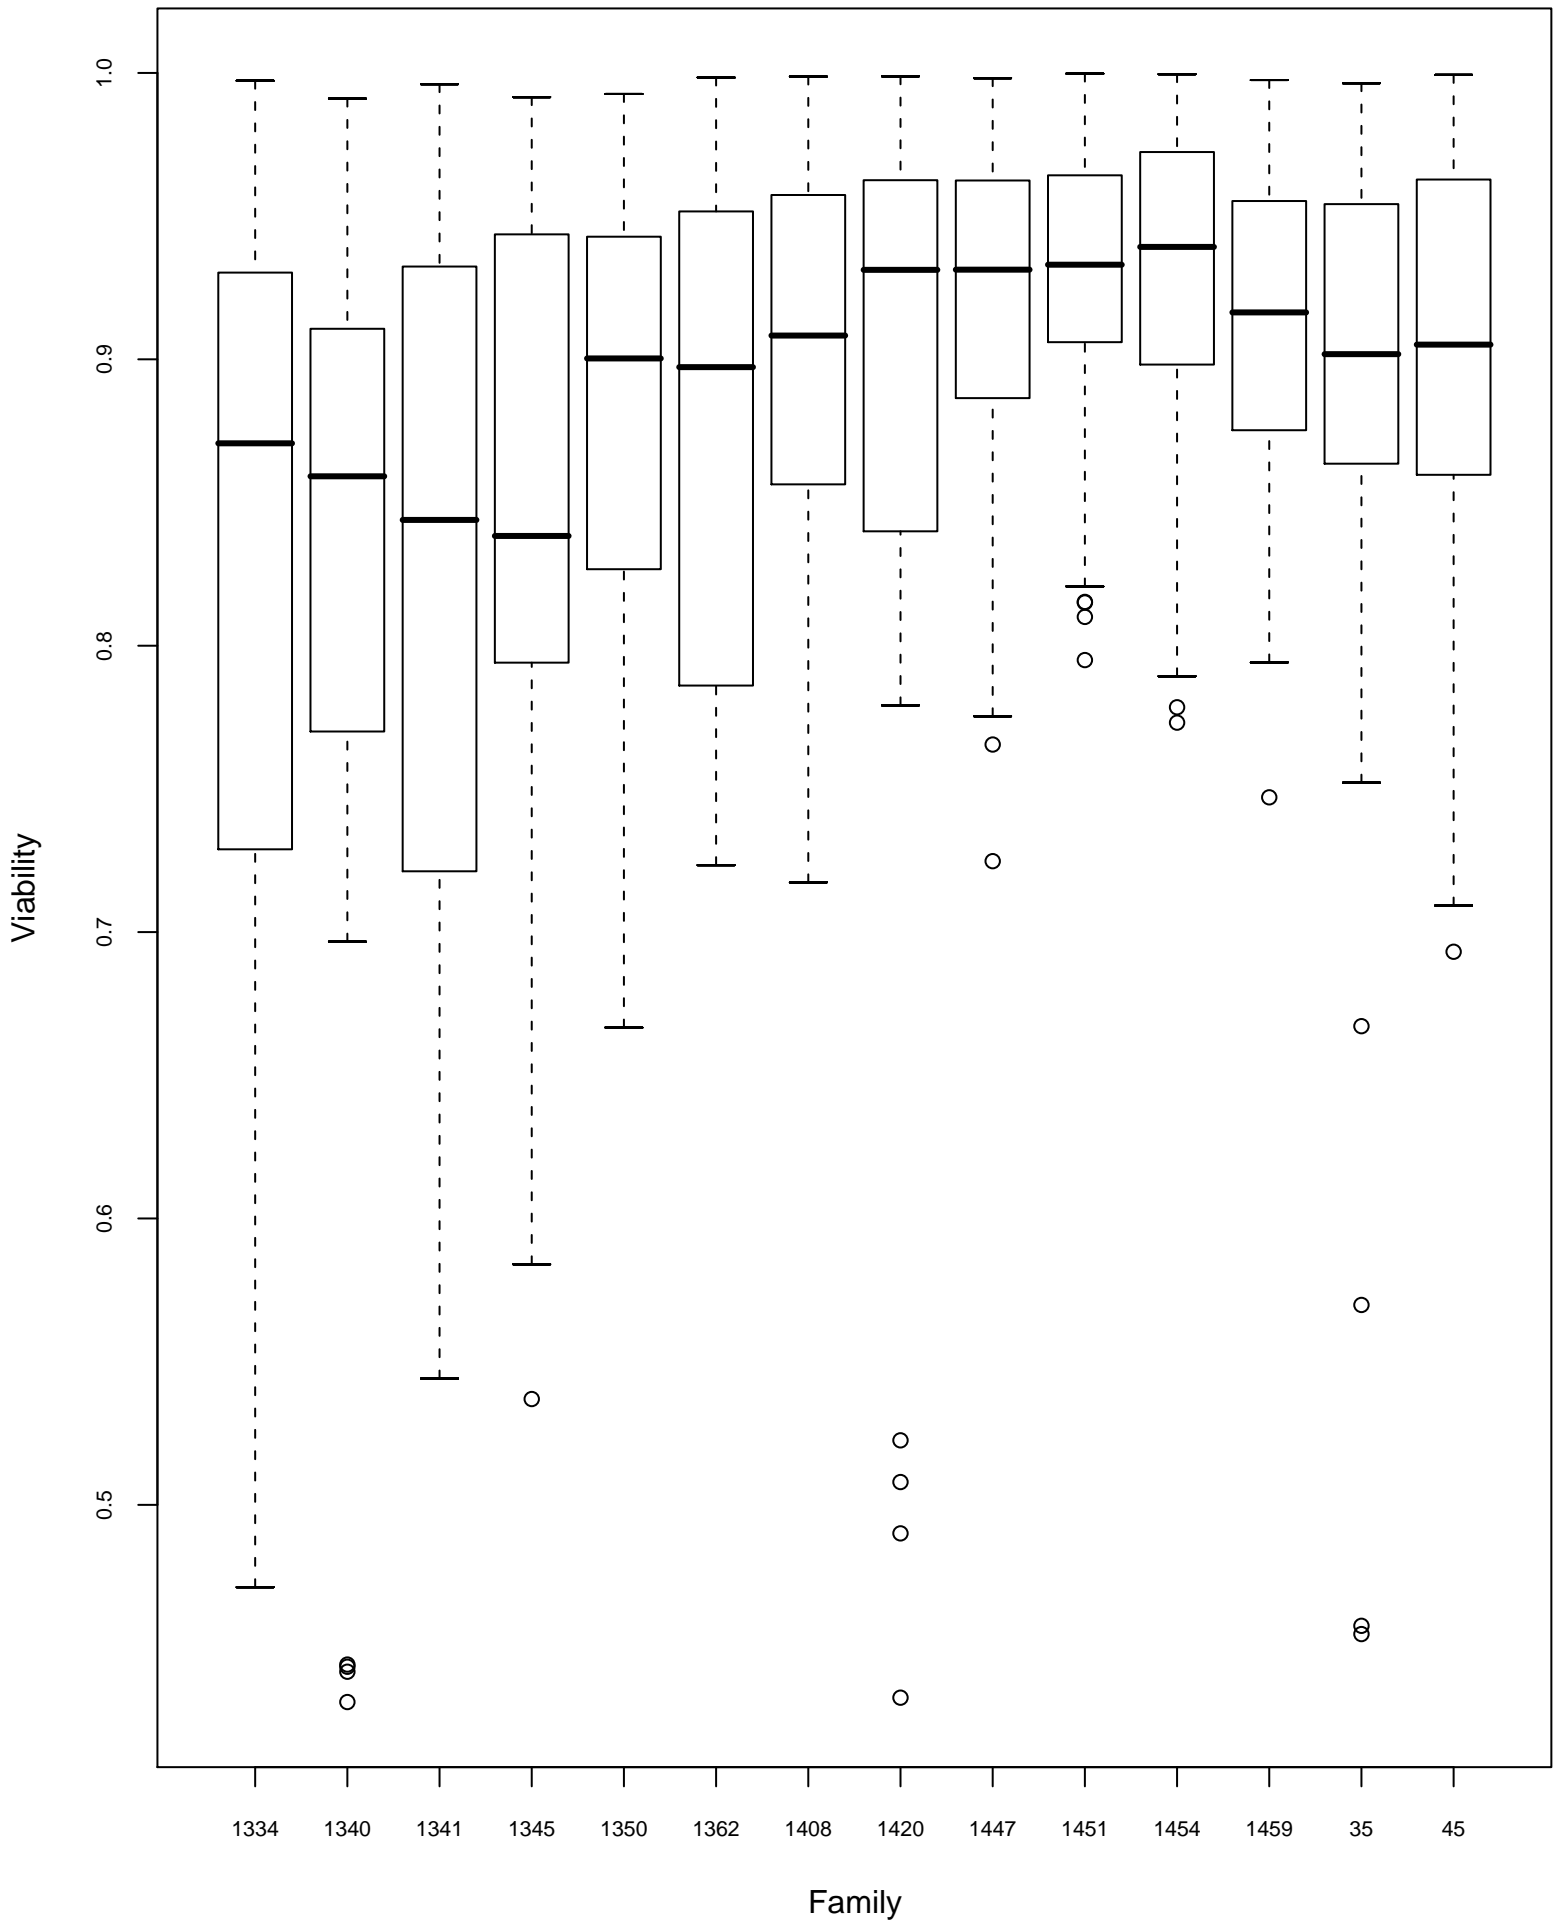



# Drug Oxal, dose 0.1 (mM)

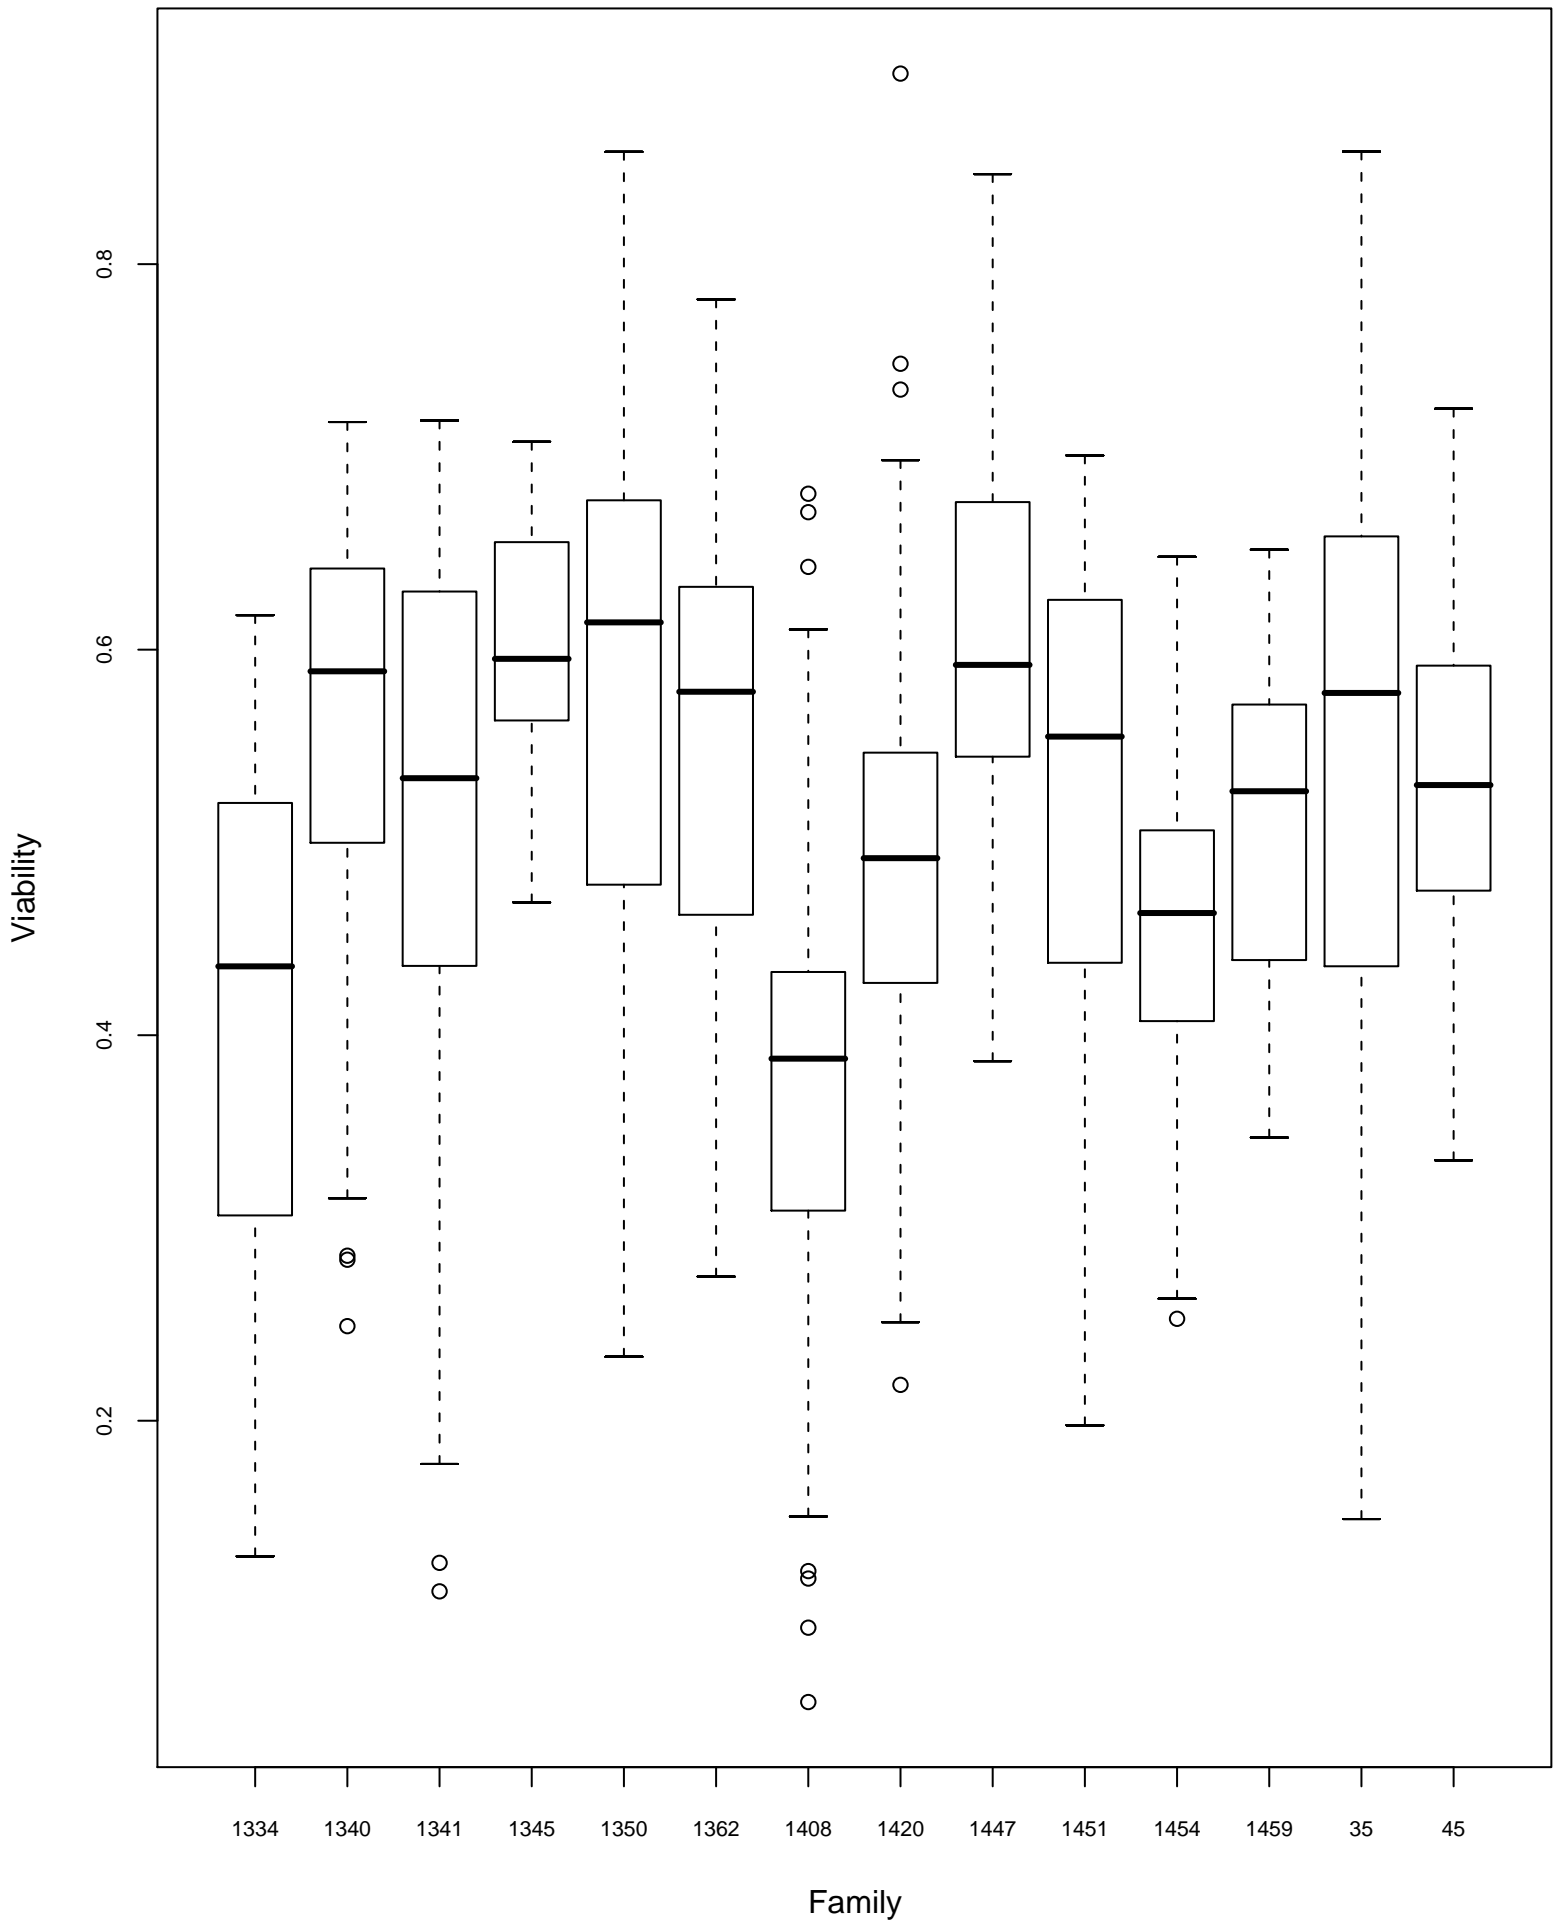

# Drug Oxal, dose 0.0333333 (mM)

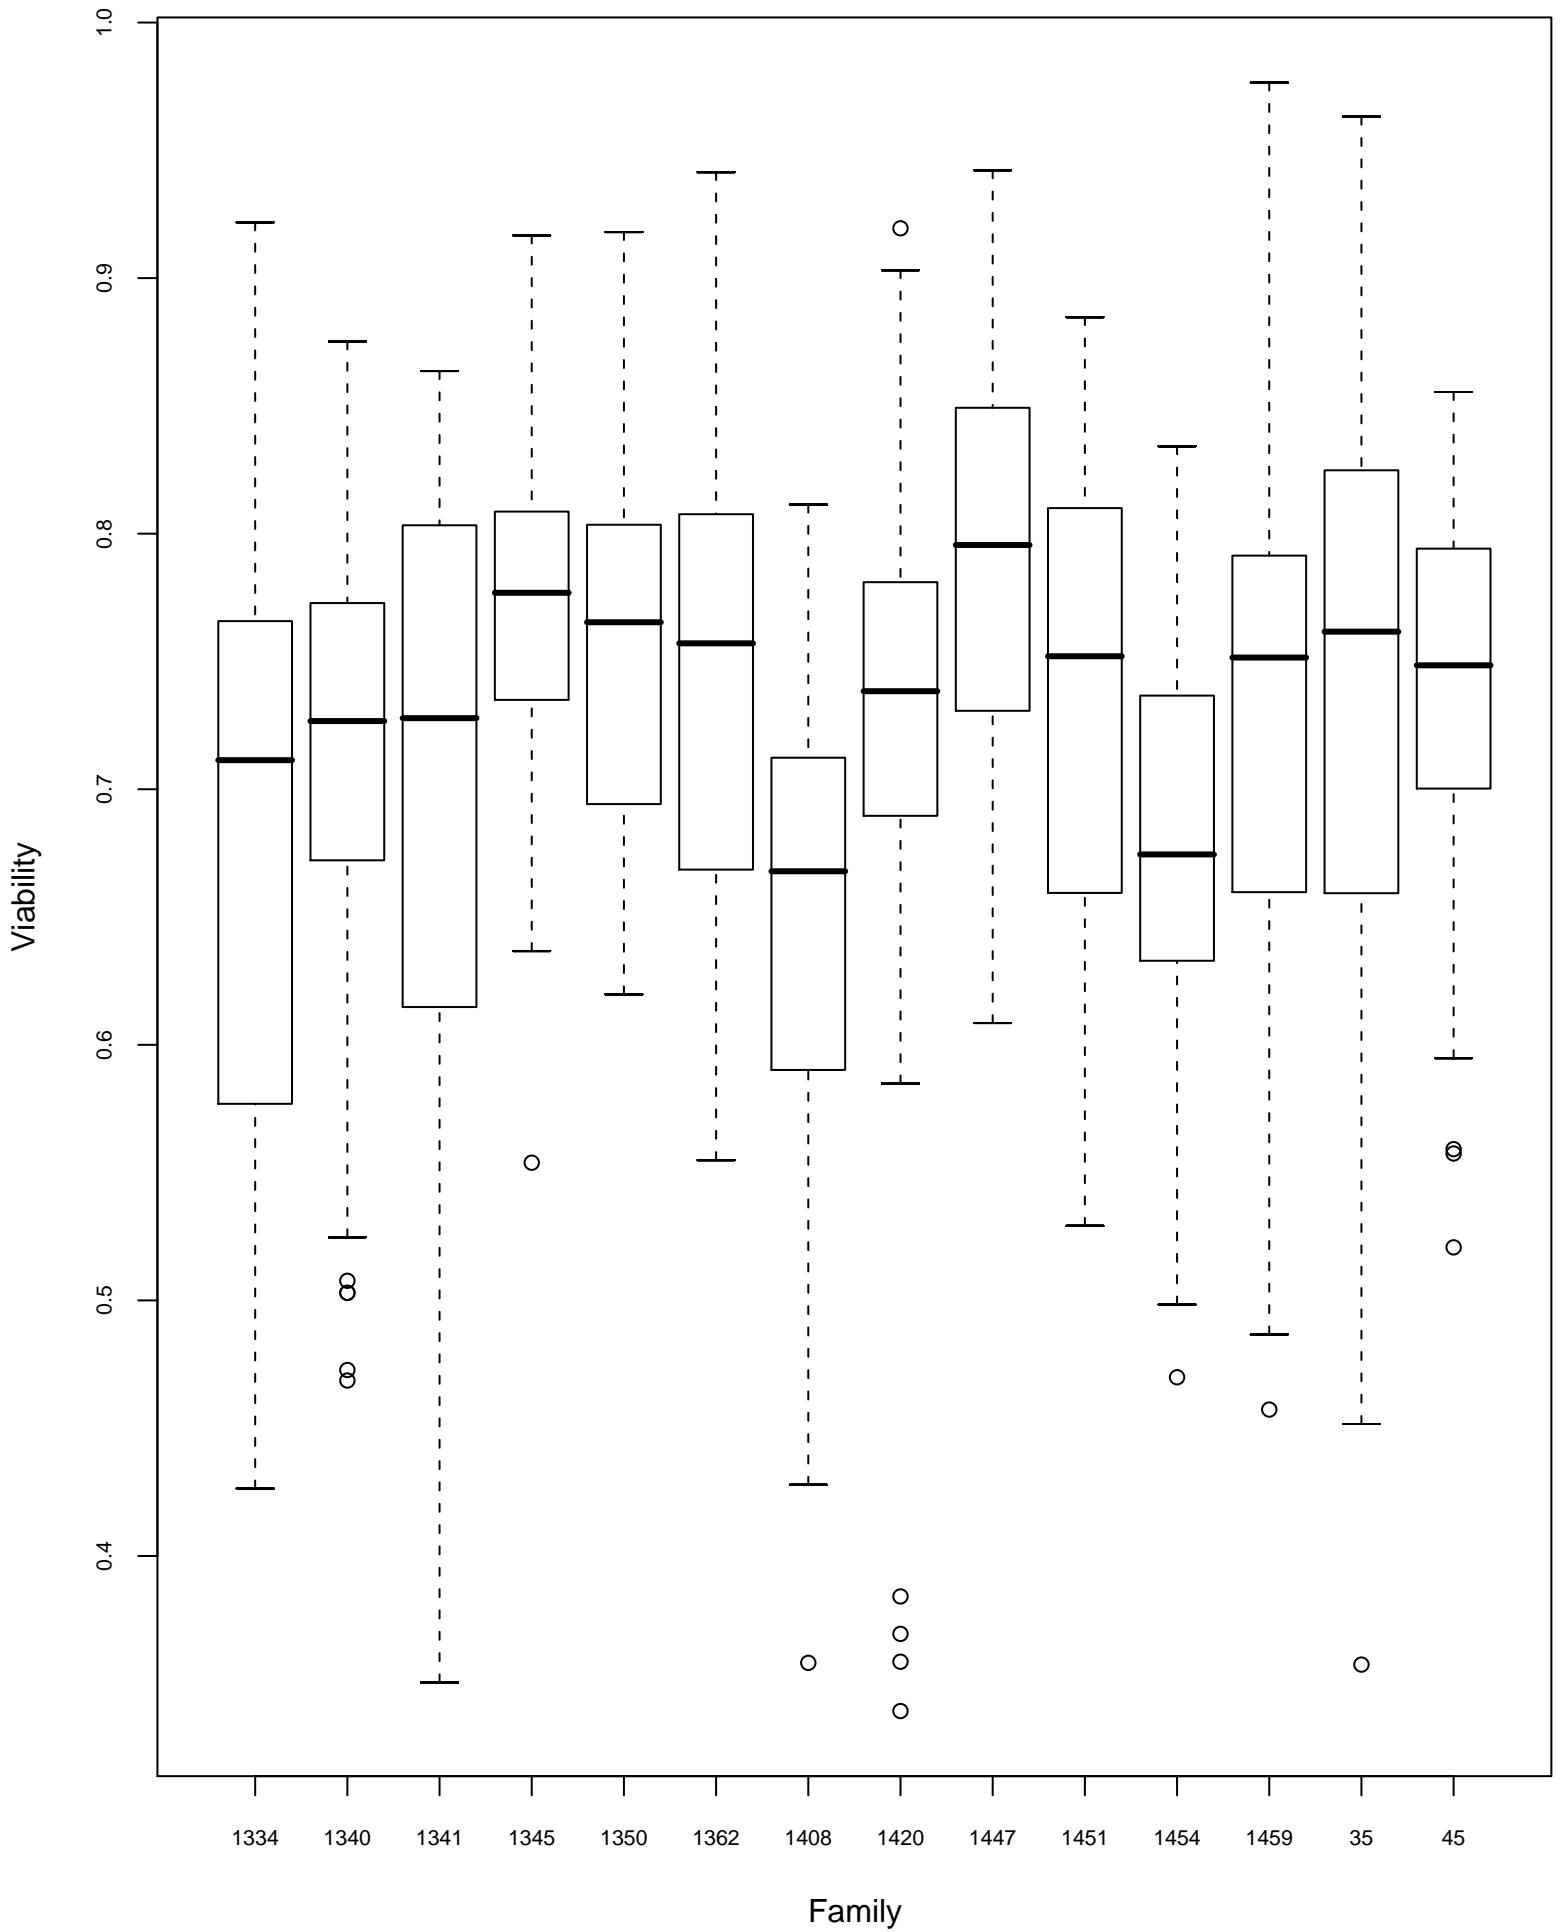

# Drug Oxal, dose 0.0111111 (mM)

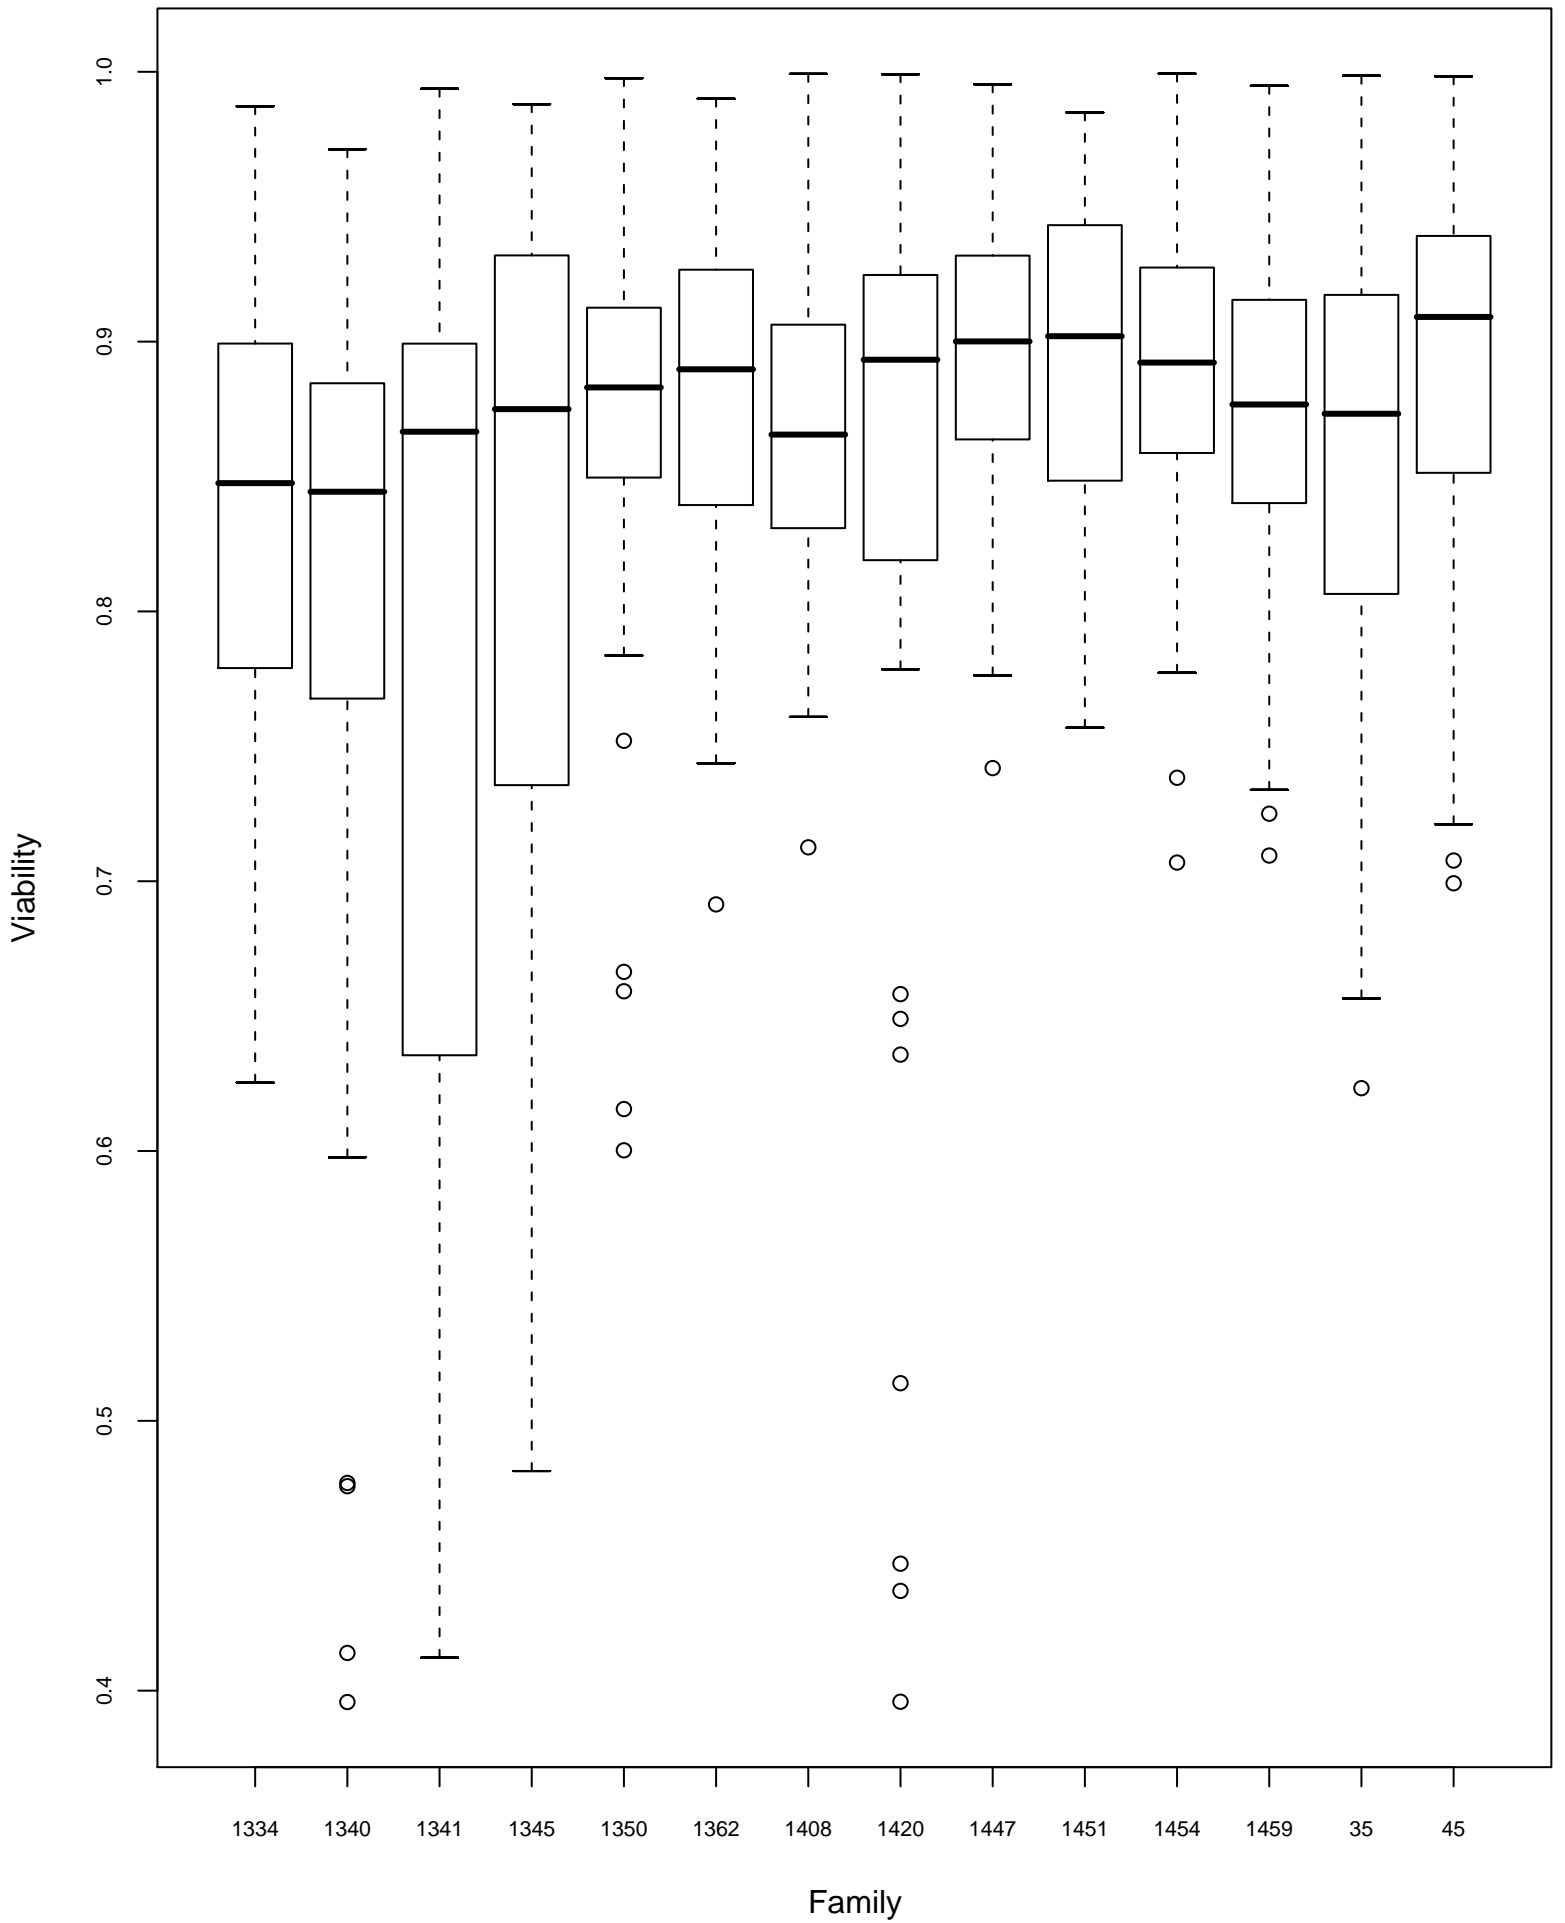

# Drug Oxal, dose 0.0037037 (mM)

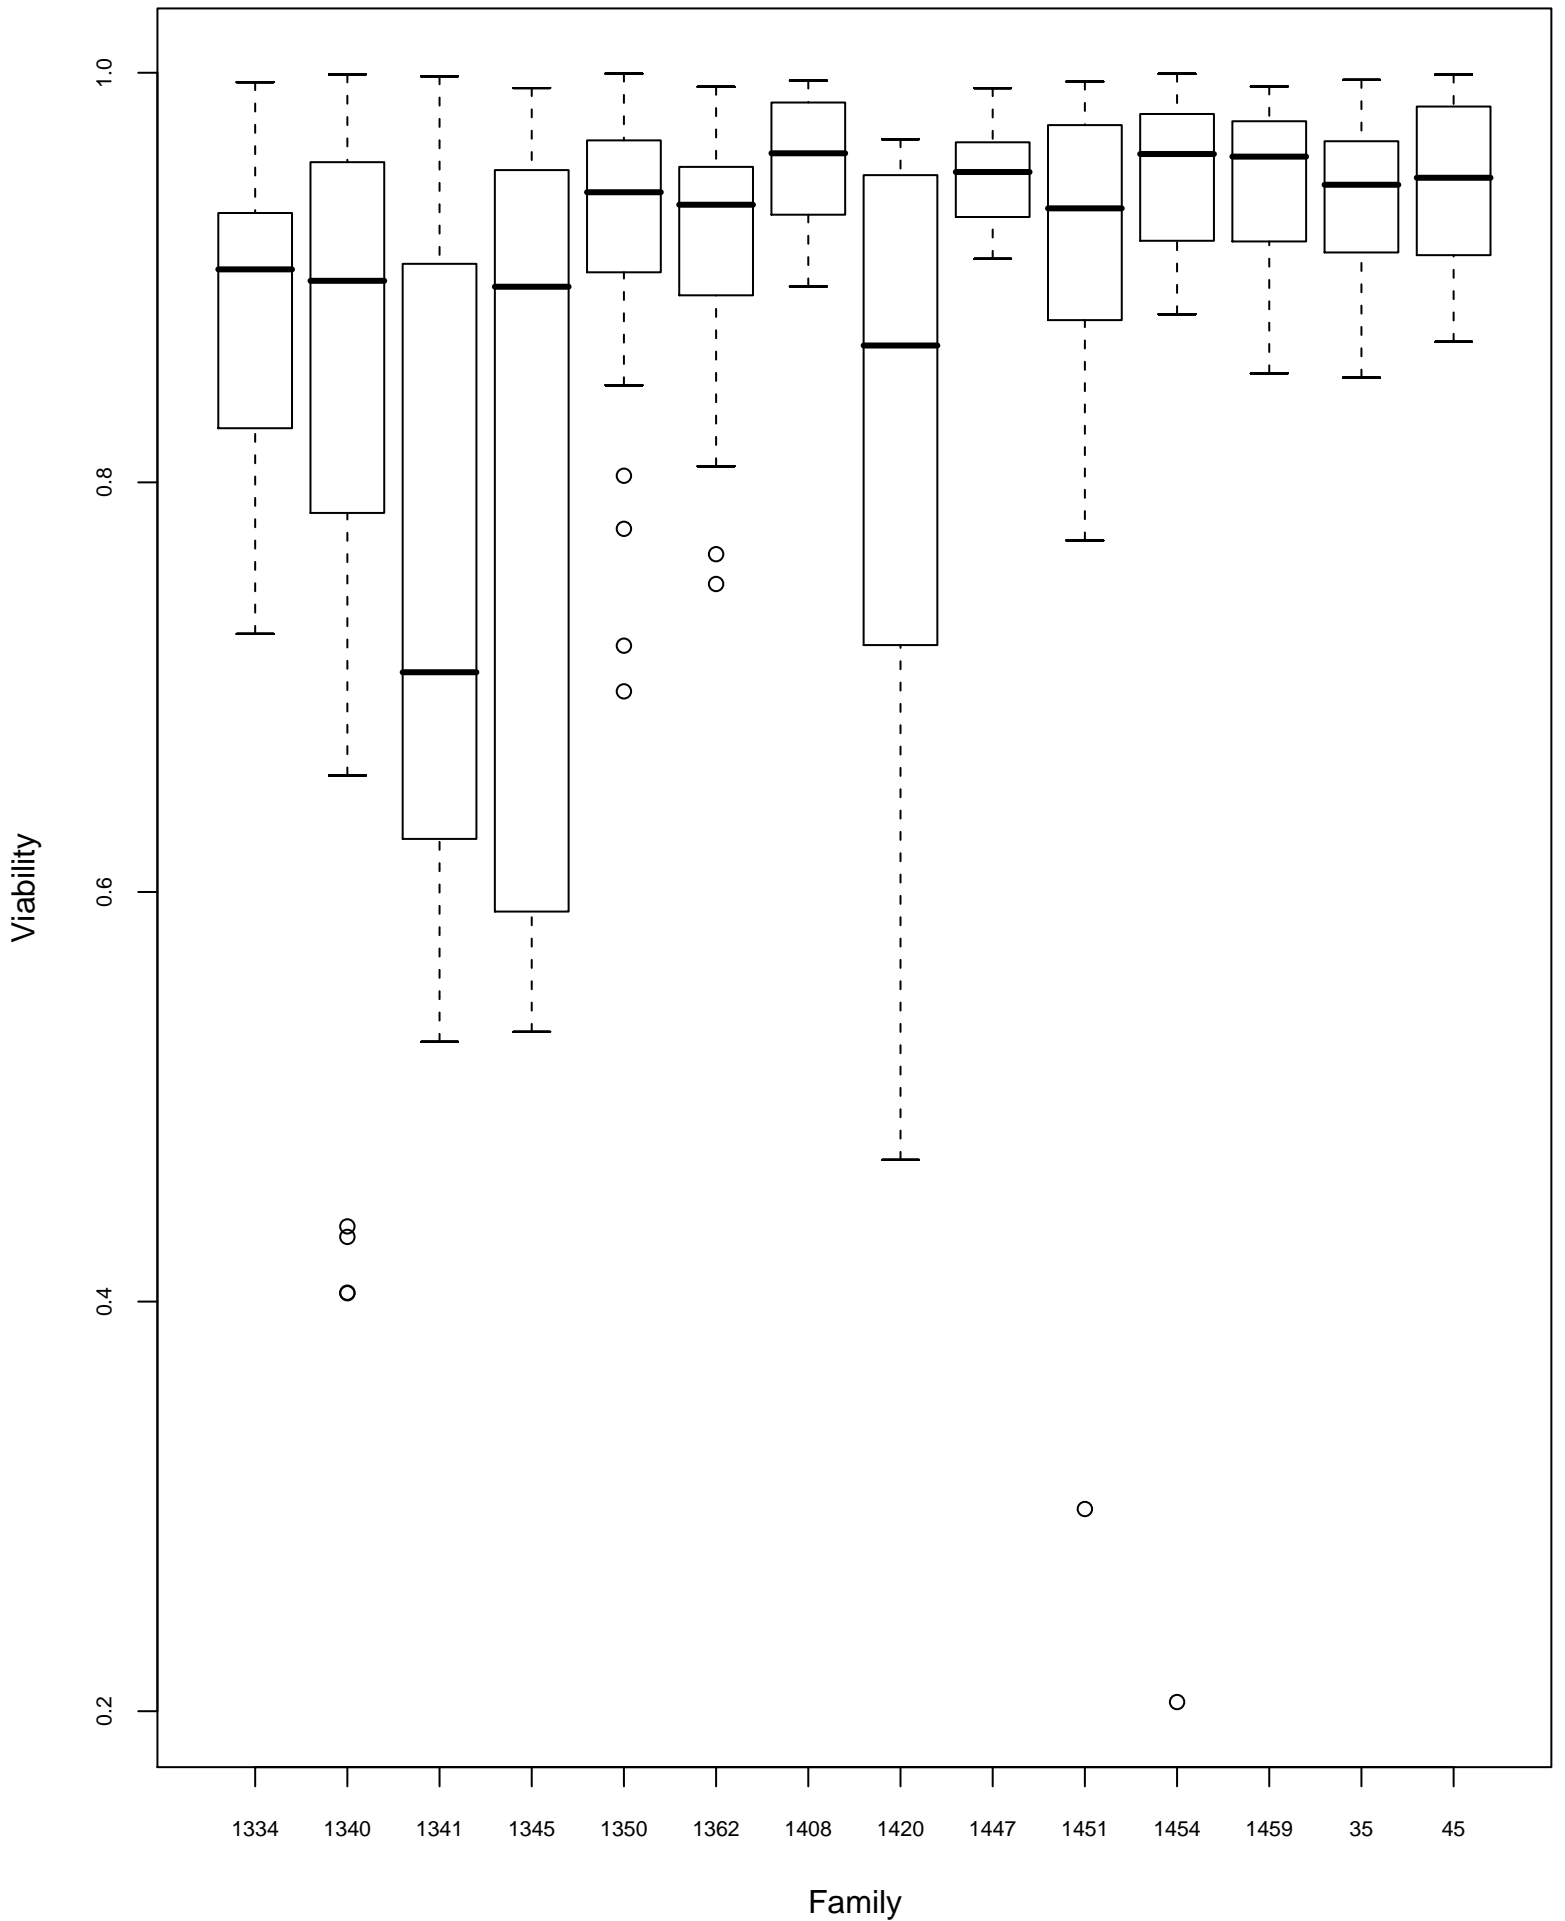

# Drug Pac, dose 0.0005 (mM)

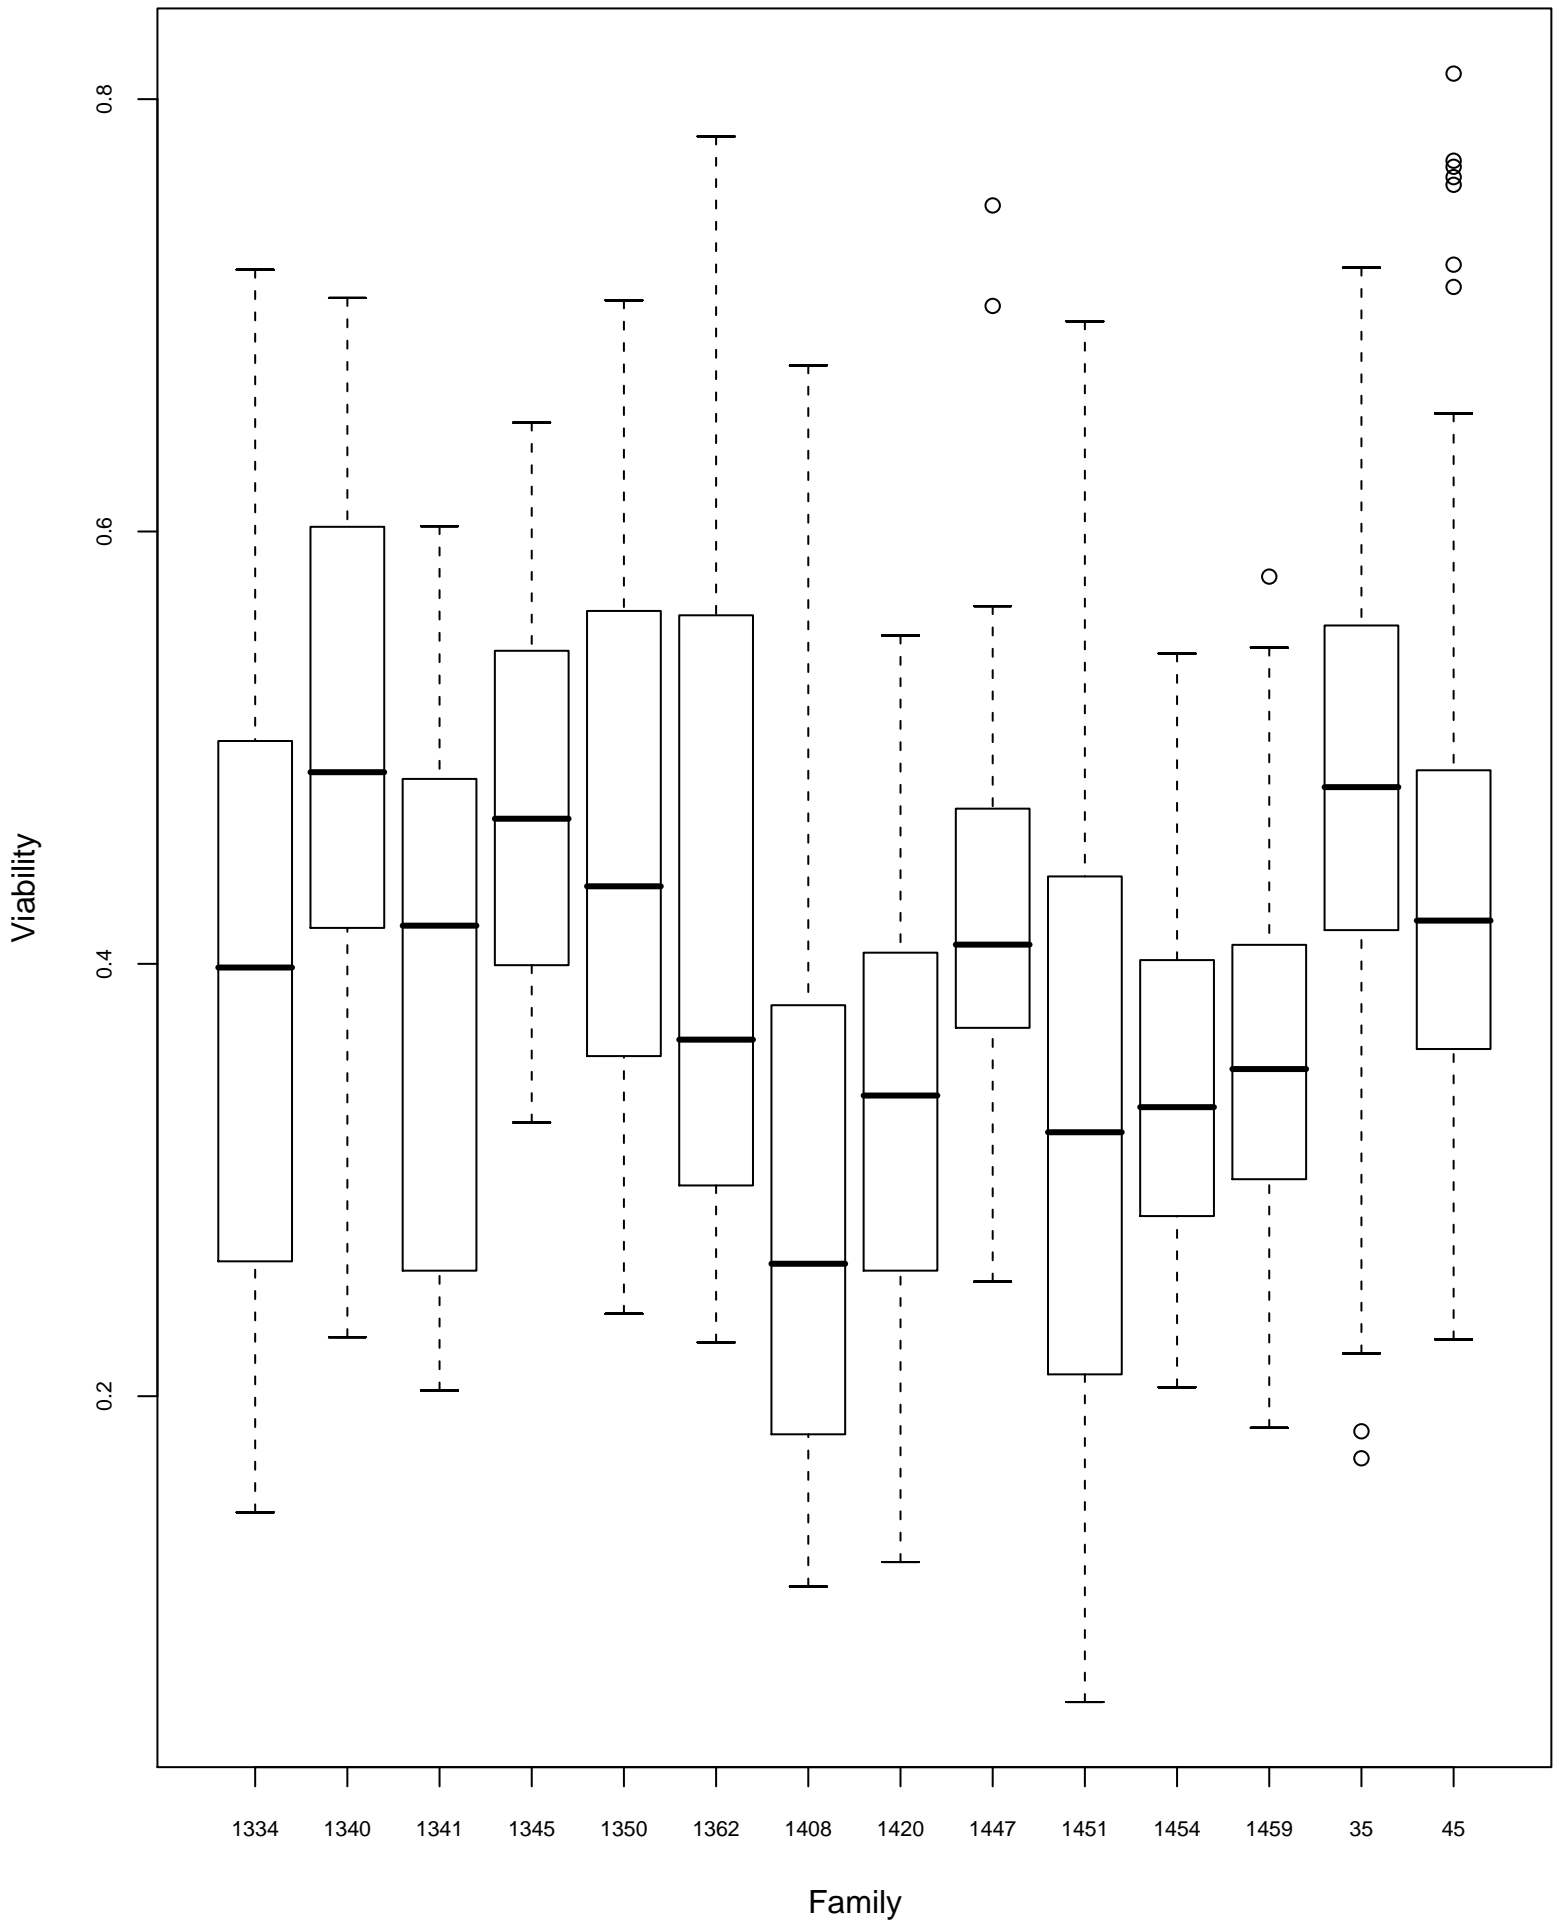

# Drug Pac, dose 0.0001667 (mM)

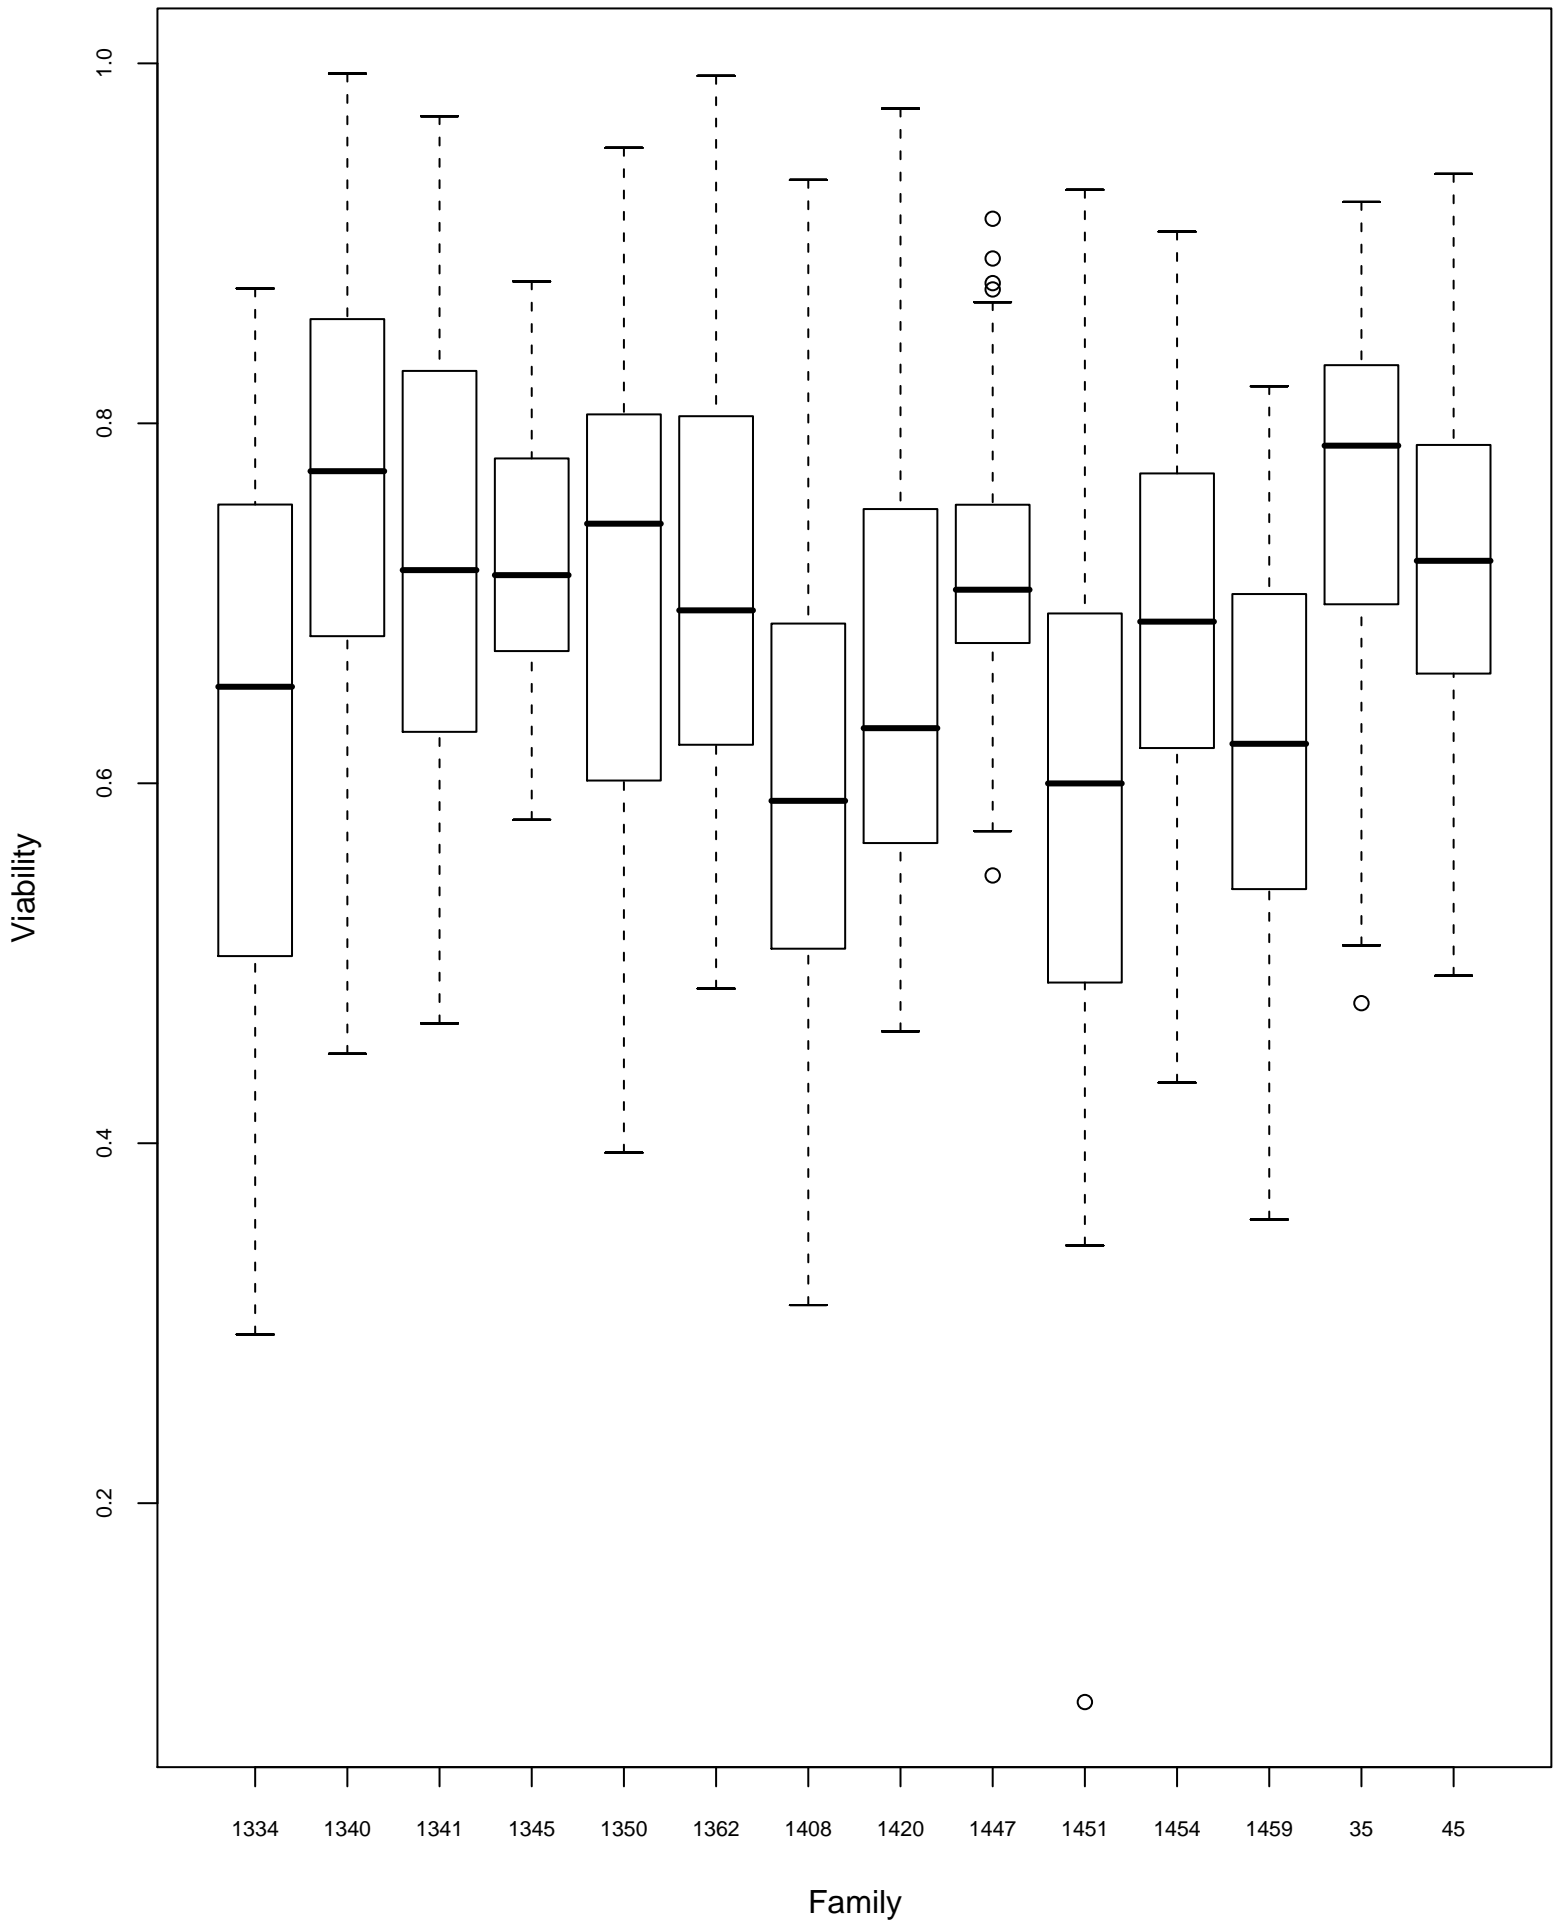

# Drug Pac, dose 5.56e-05 (mM)

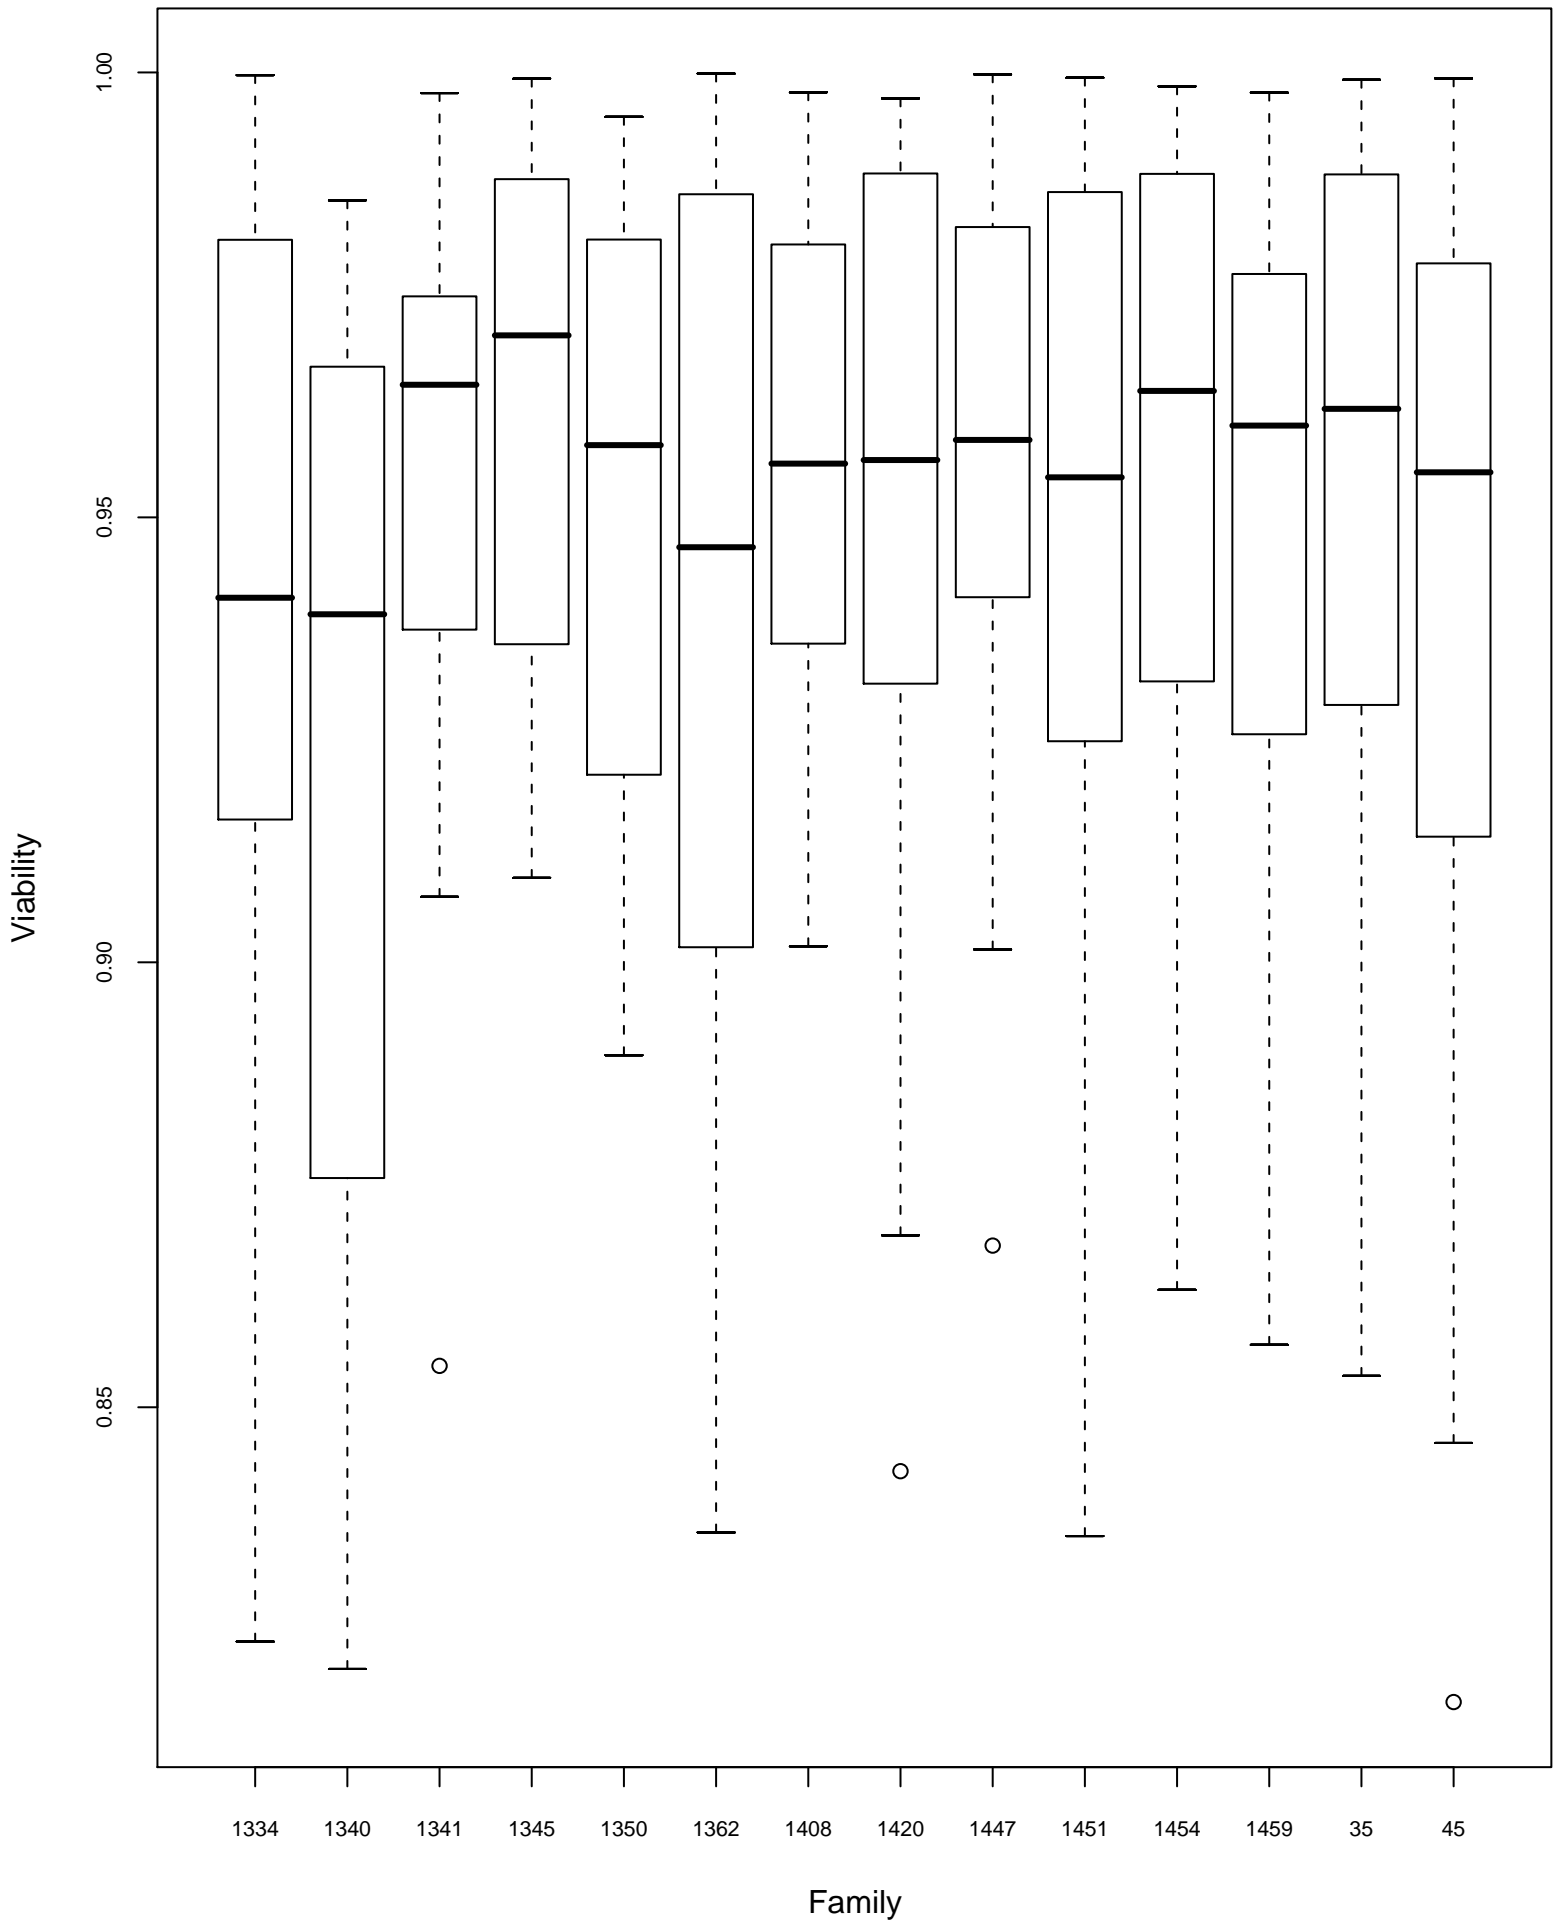

# Drug Pac, dose 1.85e-05 (mM)

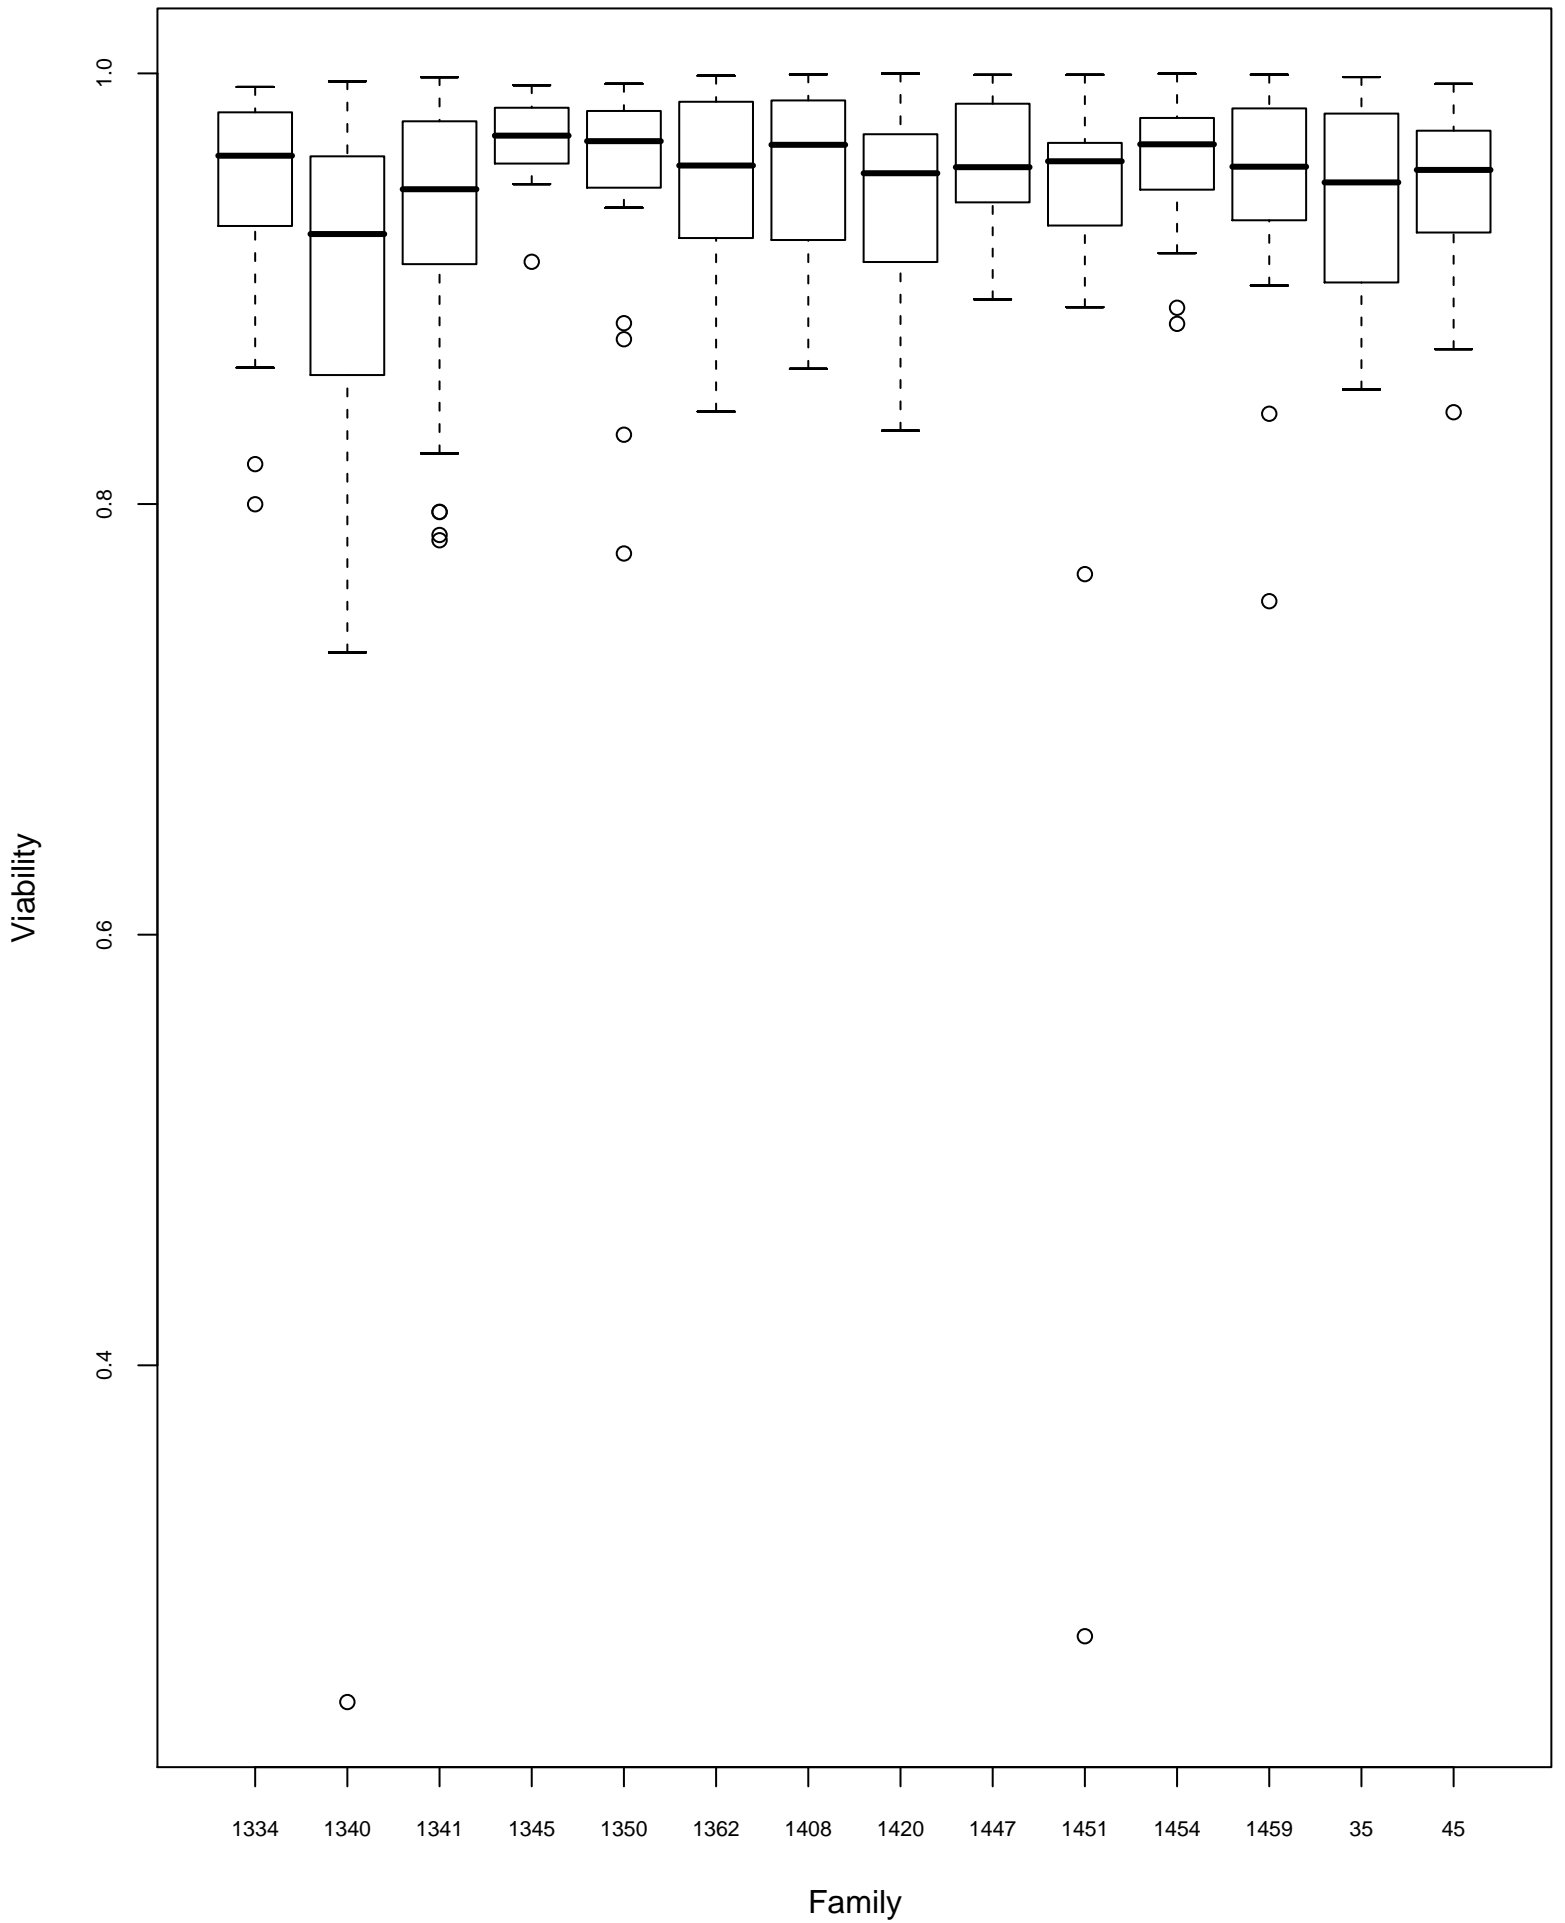



# Drug Rapa, dose 0.001 (mM)

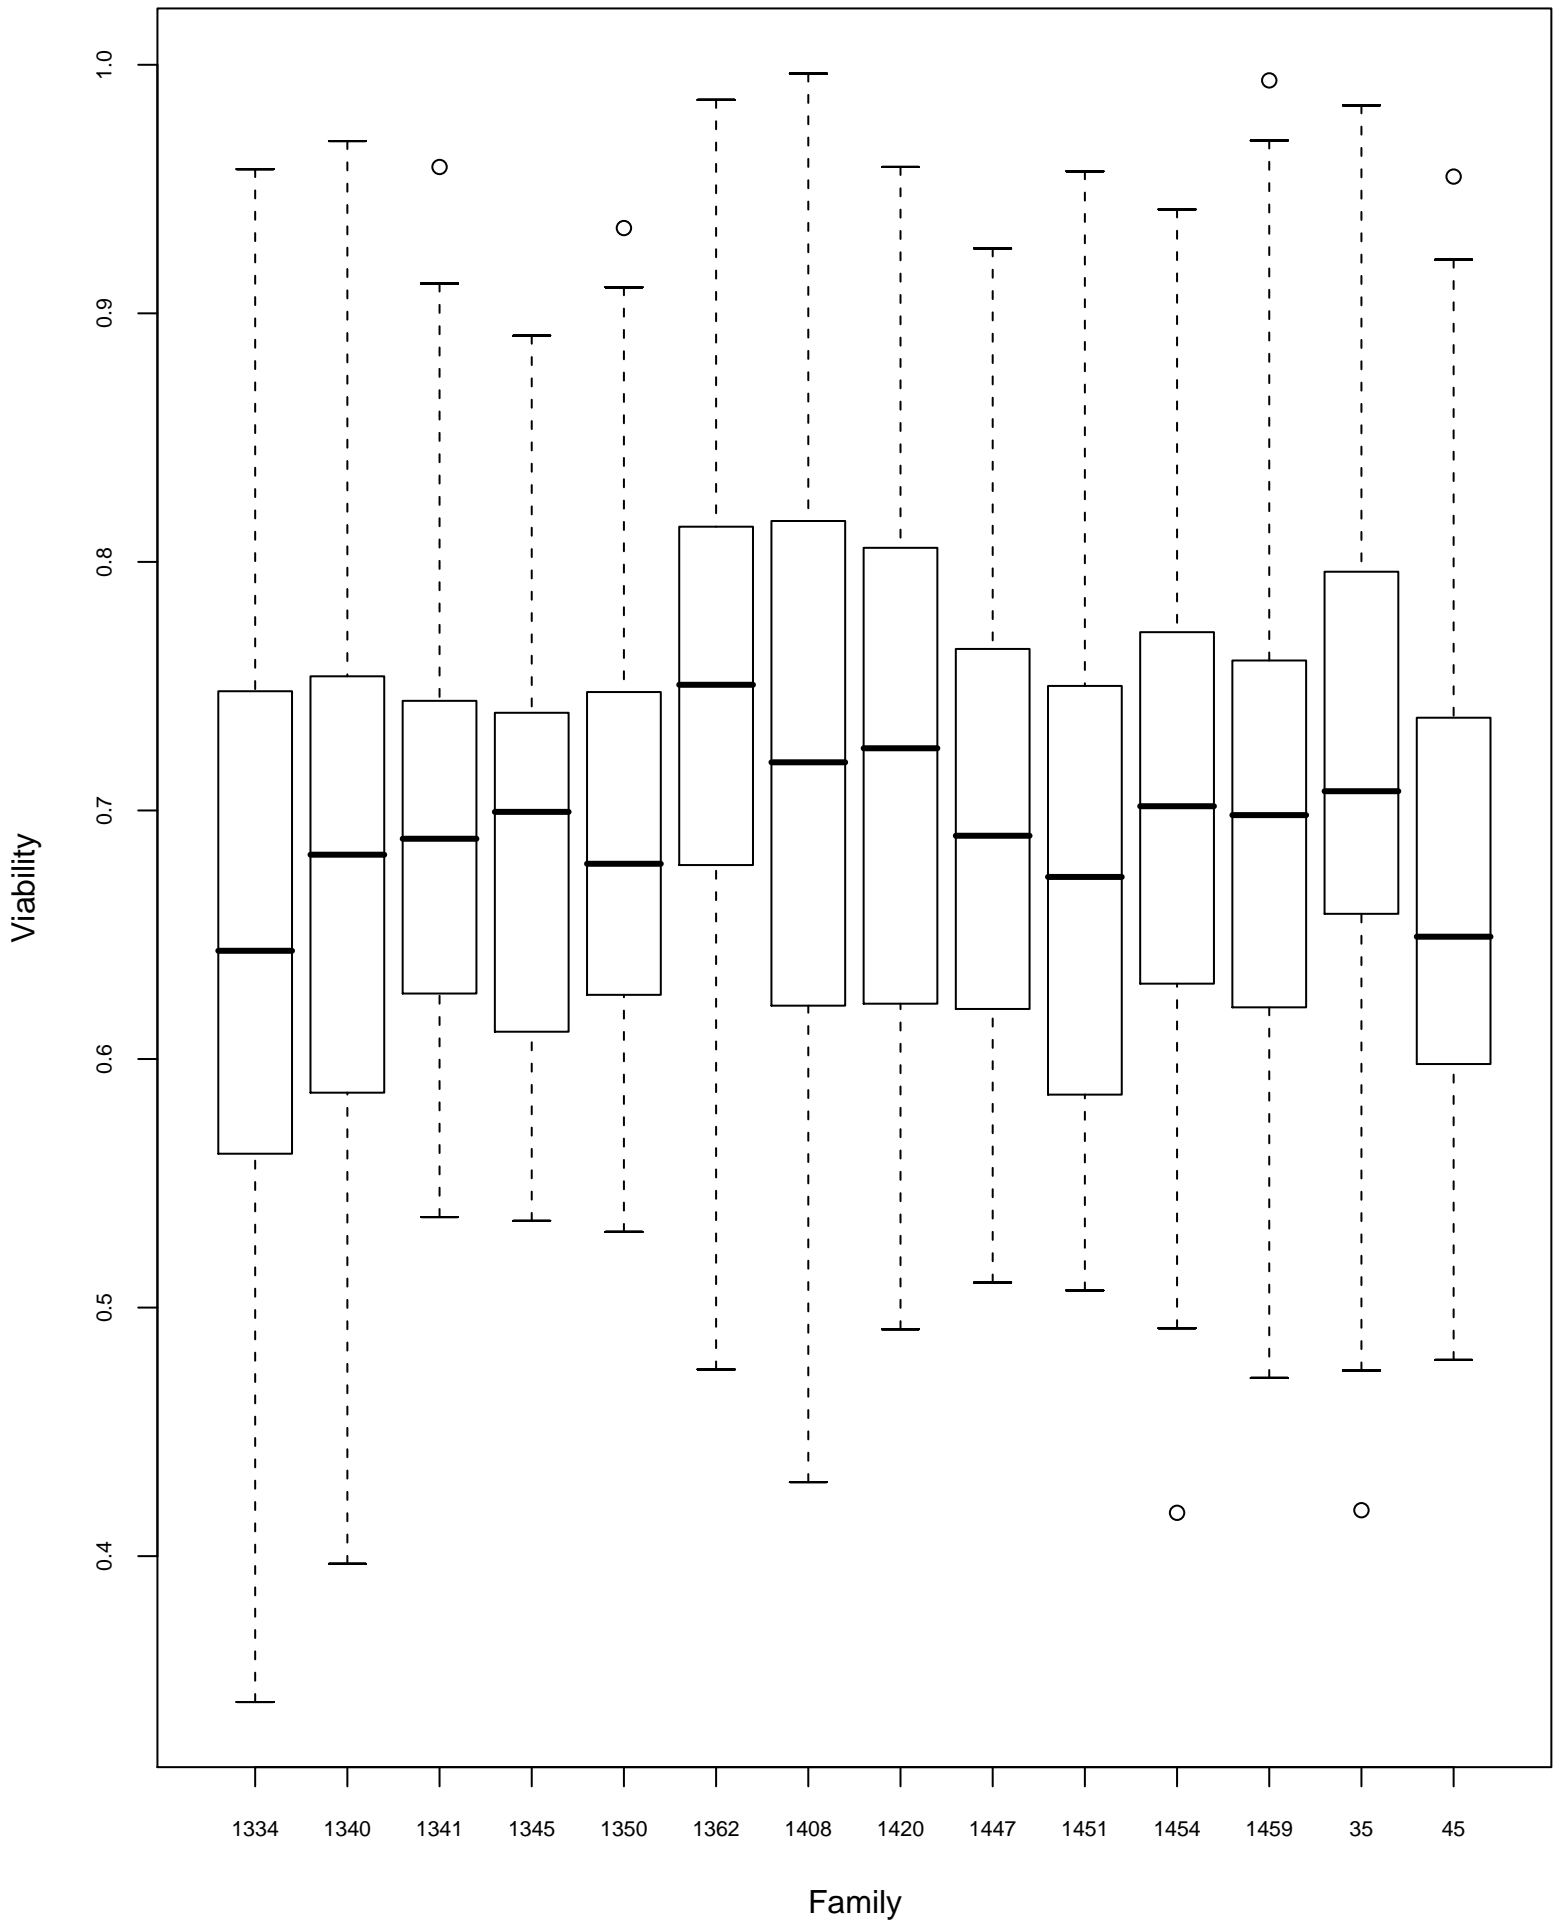

# Drug Rapa, dose 0.0001 (mM)

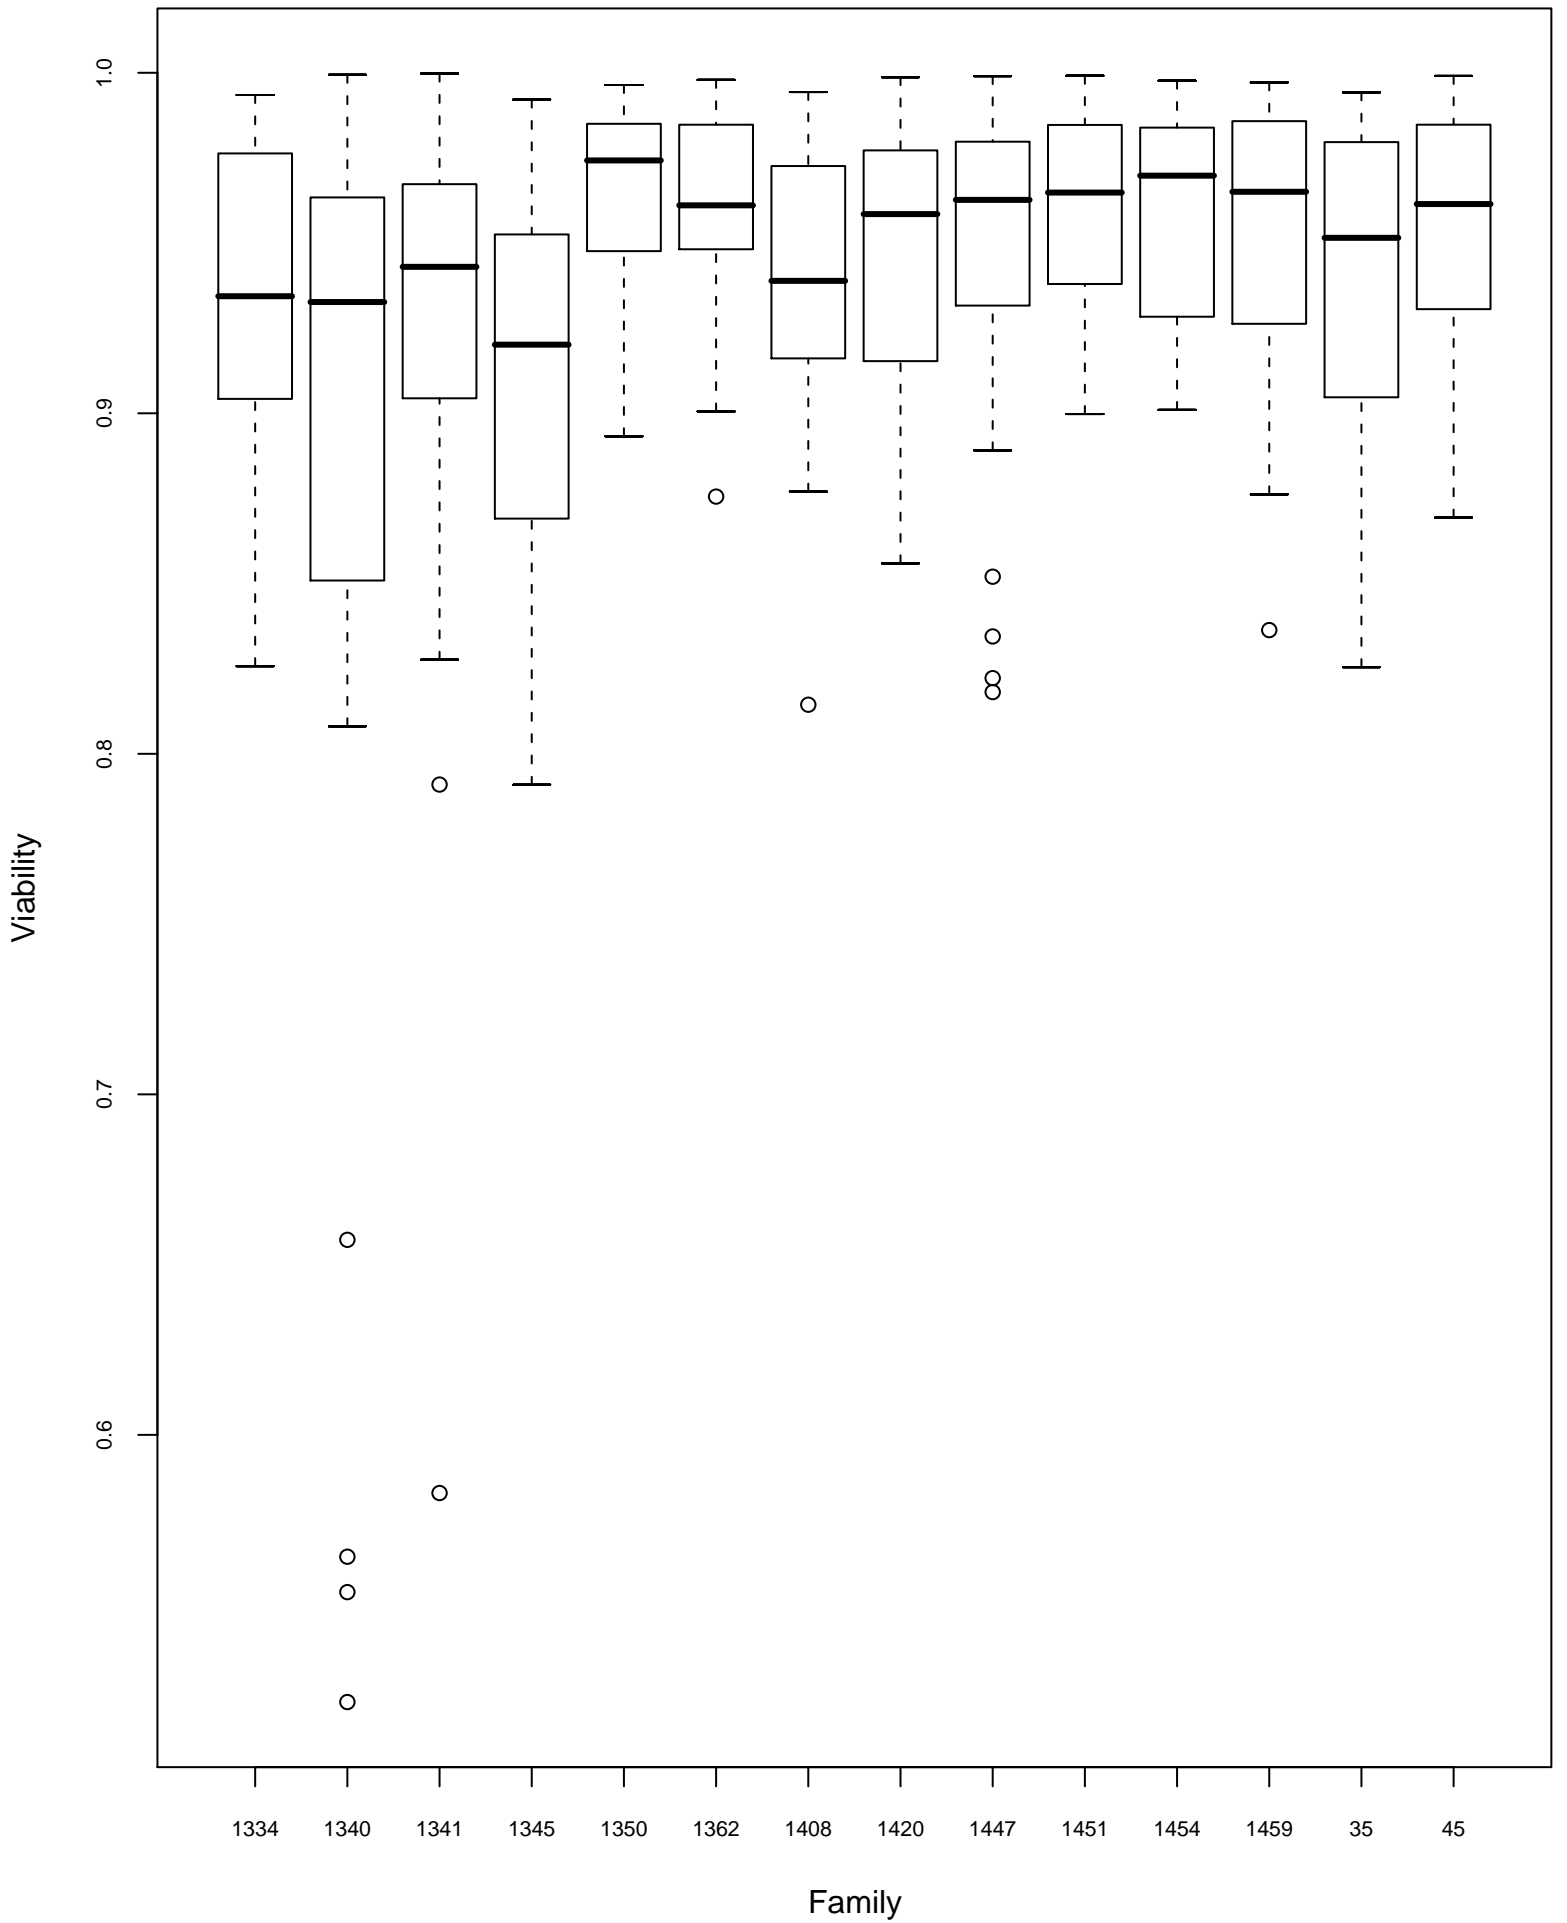

# Drug Rapa, dose 1e-05 (mM)

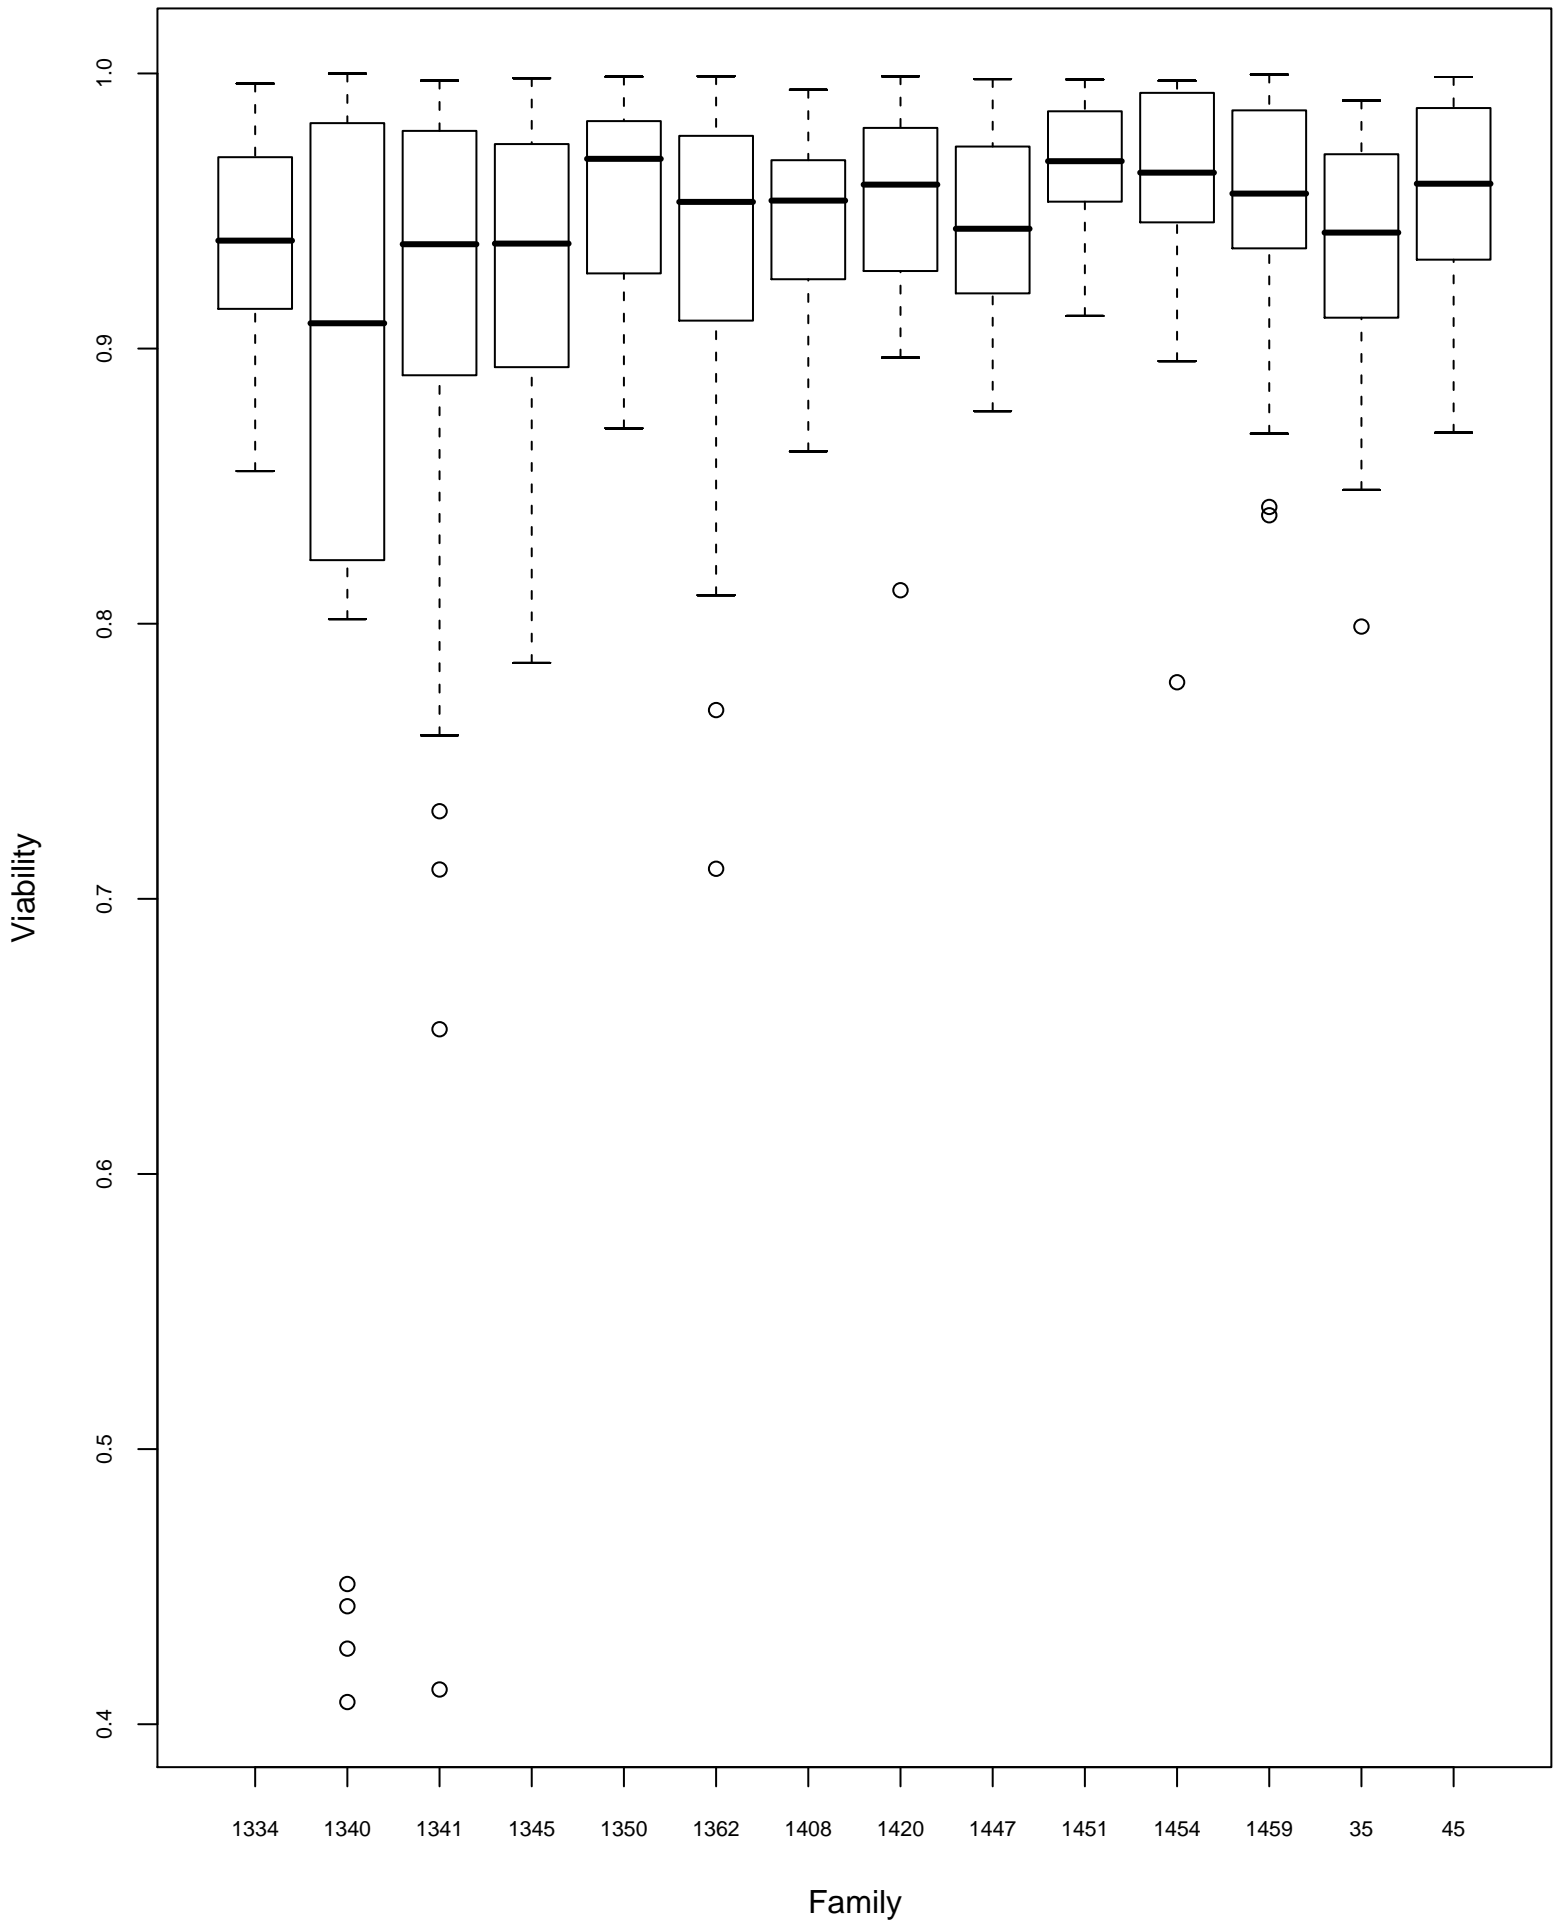

# Drug Rapa, dose 1e-06 (mM)

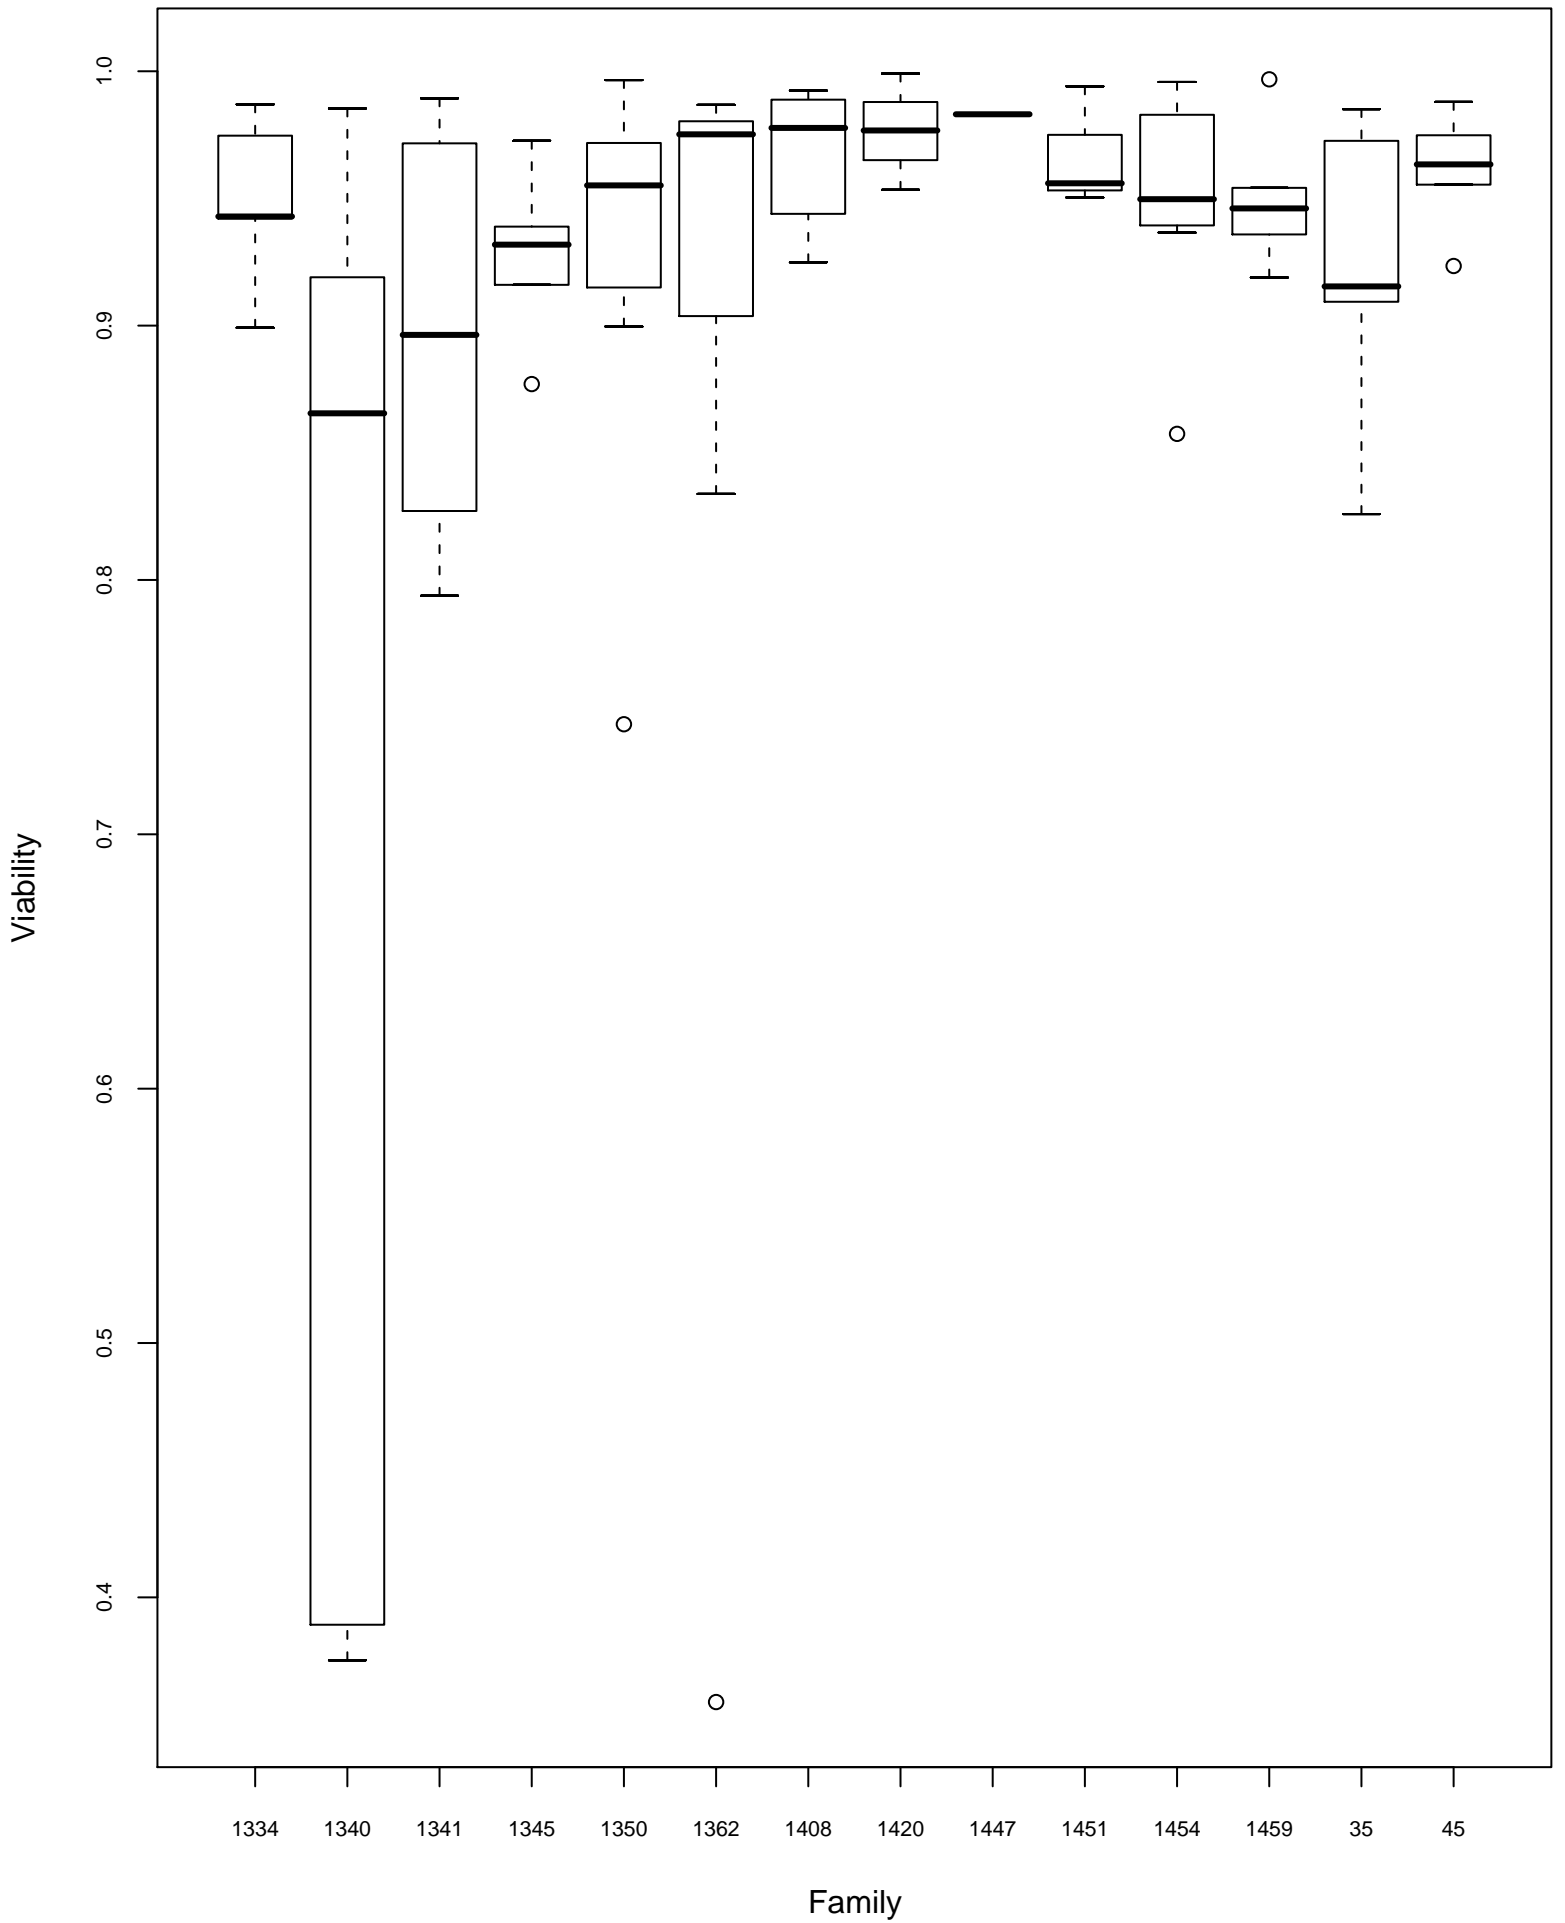

# Drug Temo, dose 1 (mM)

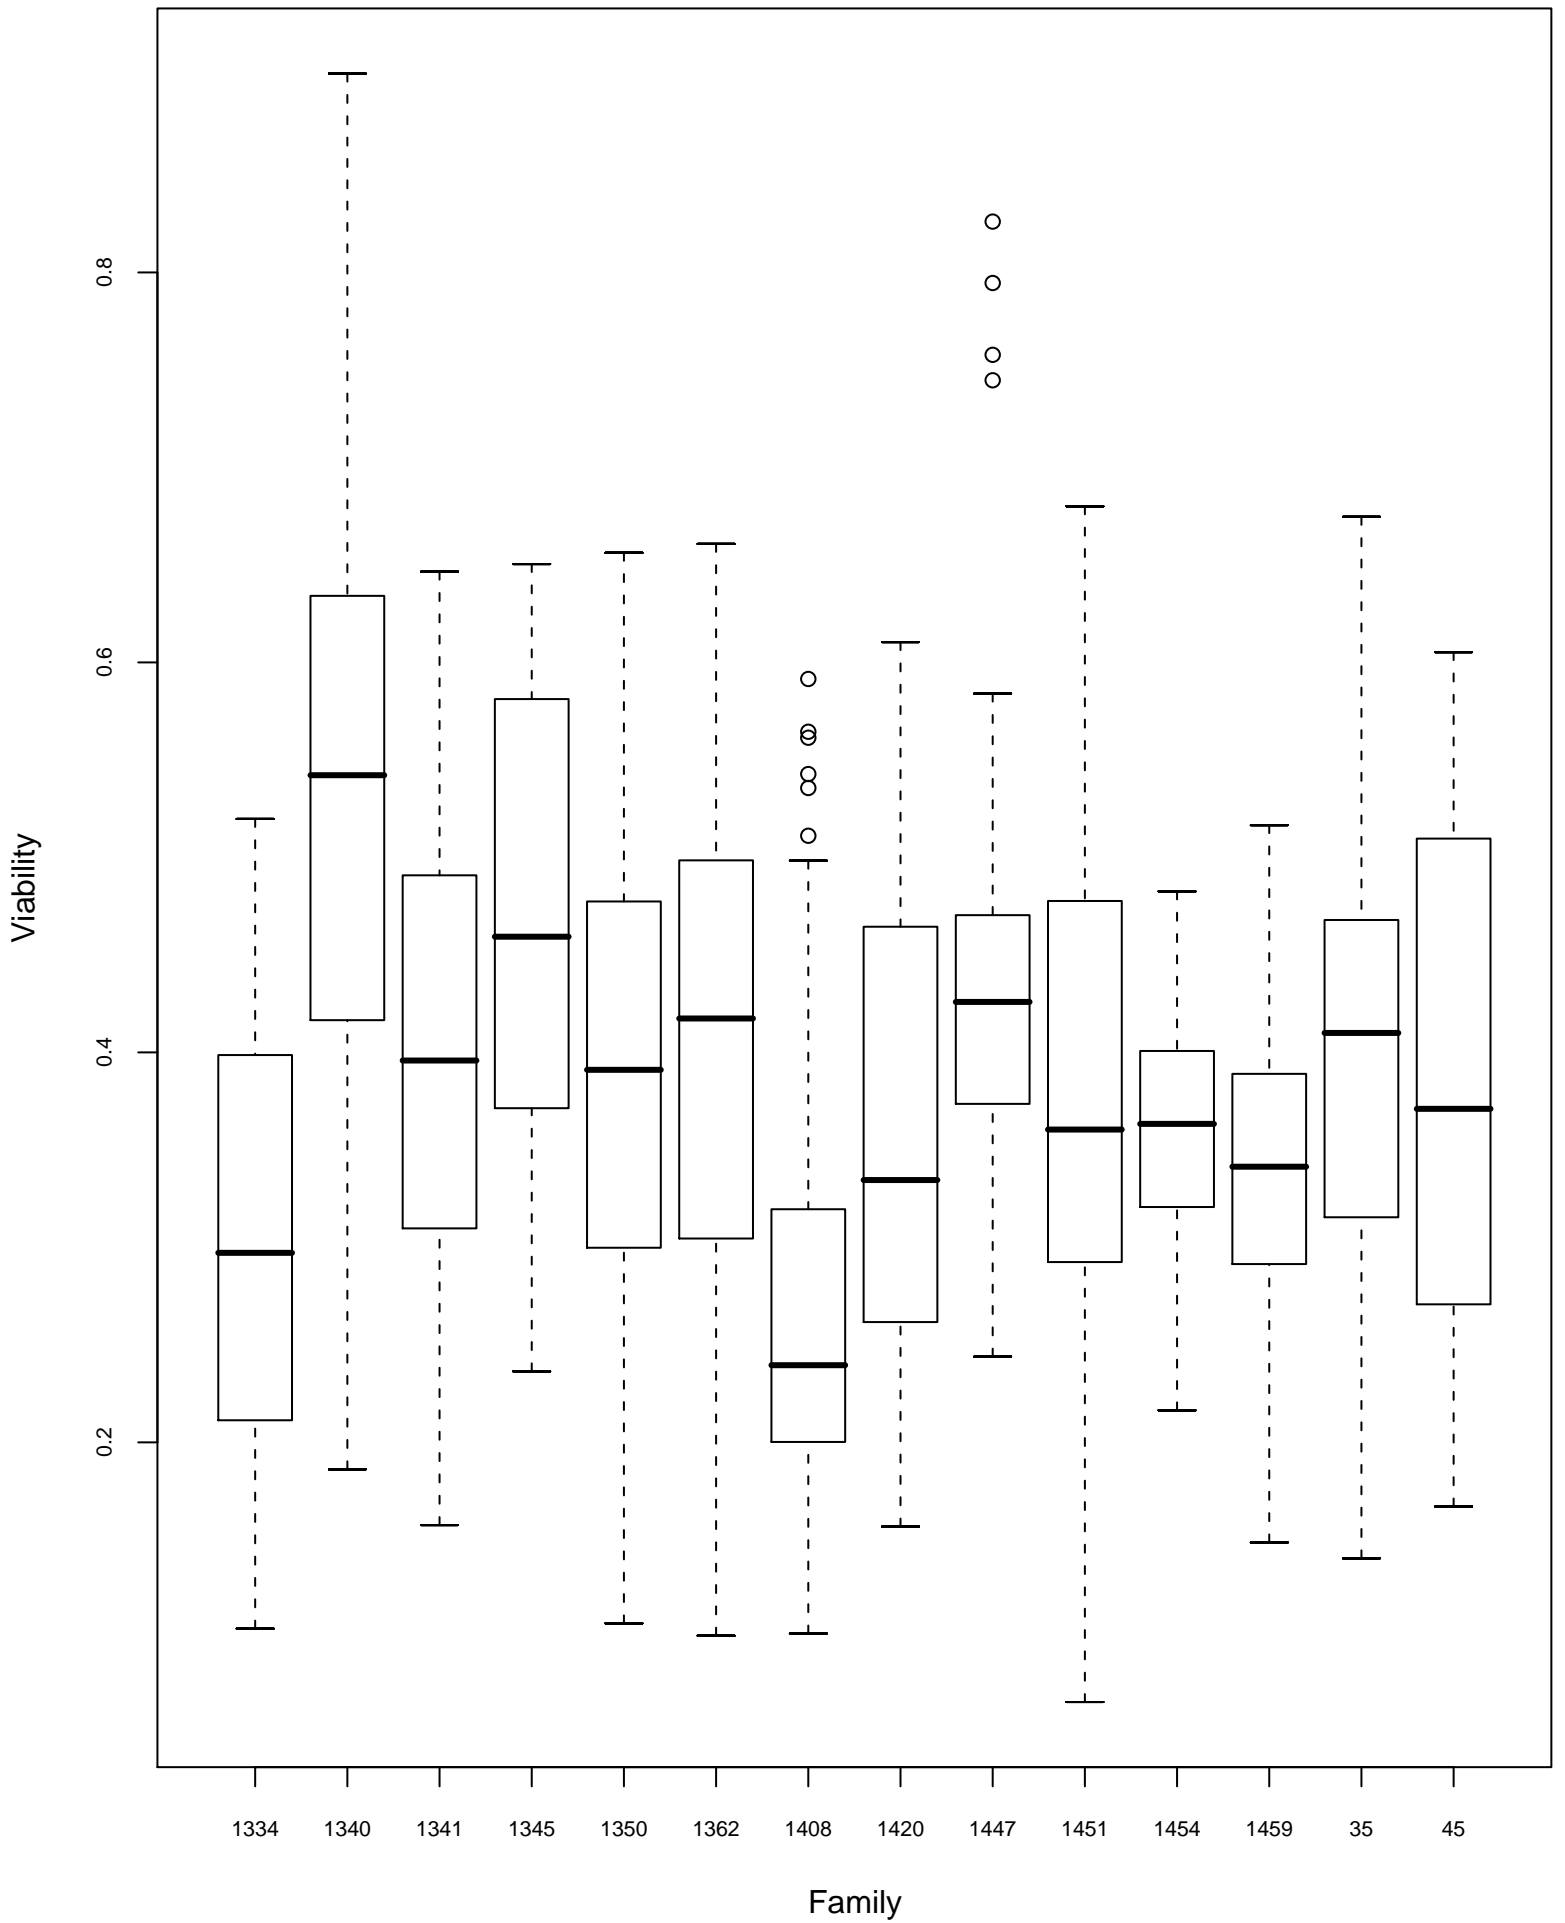

# Drug Temo, dose 0.5 (mM)

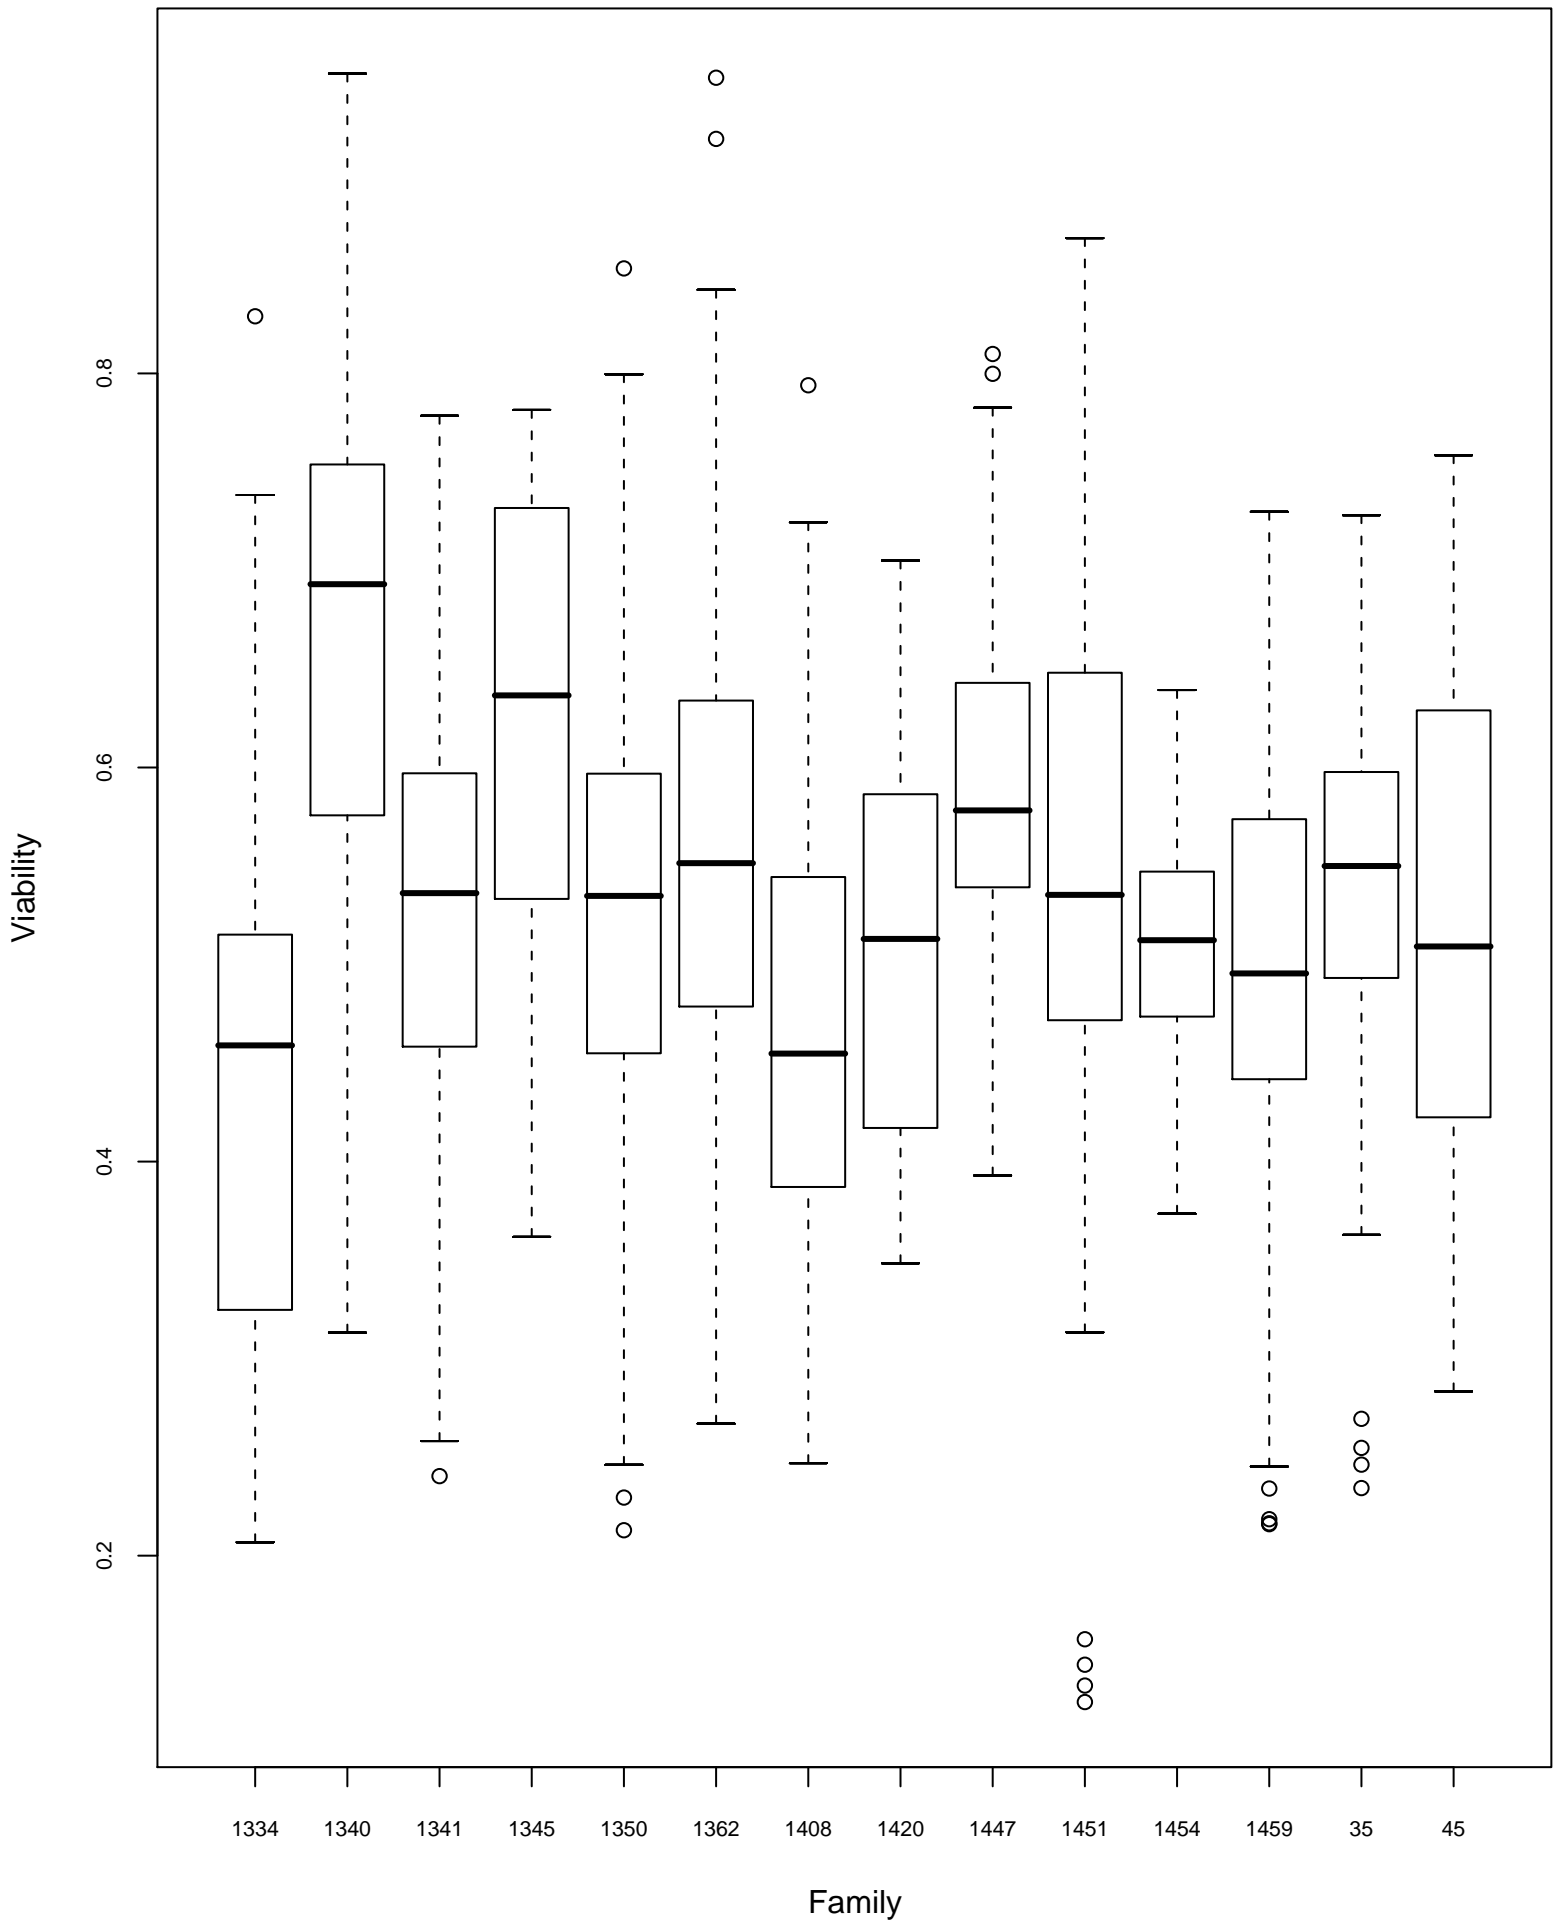

# Drug Temo, dose 0.25 (mM)

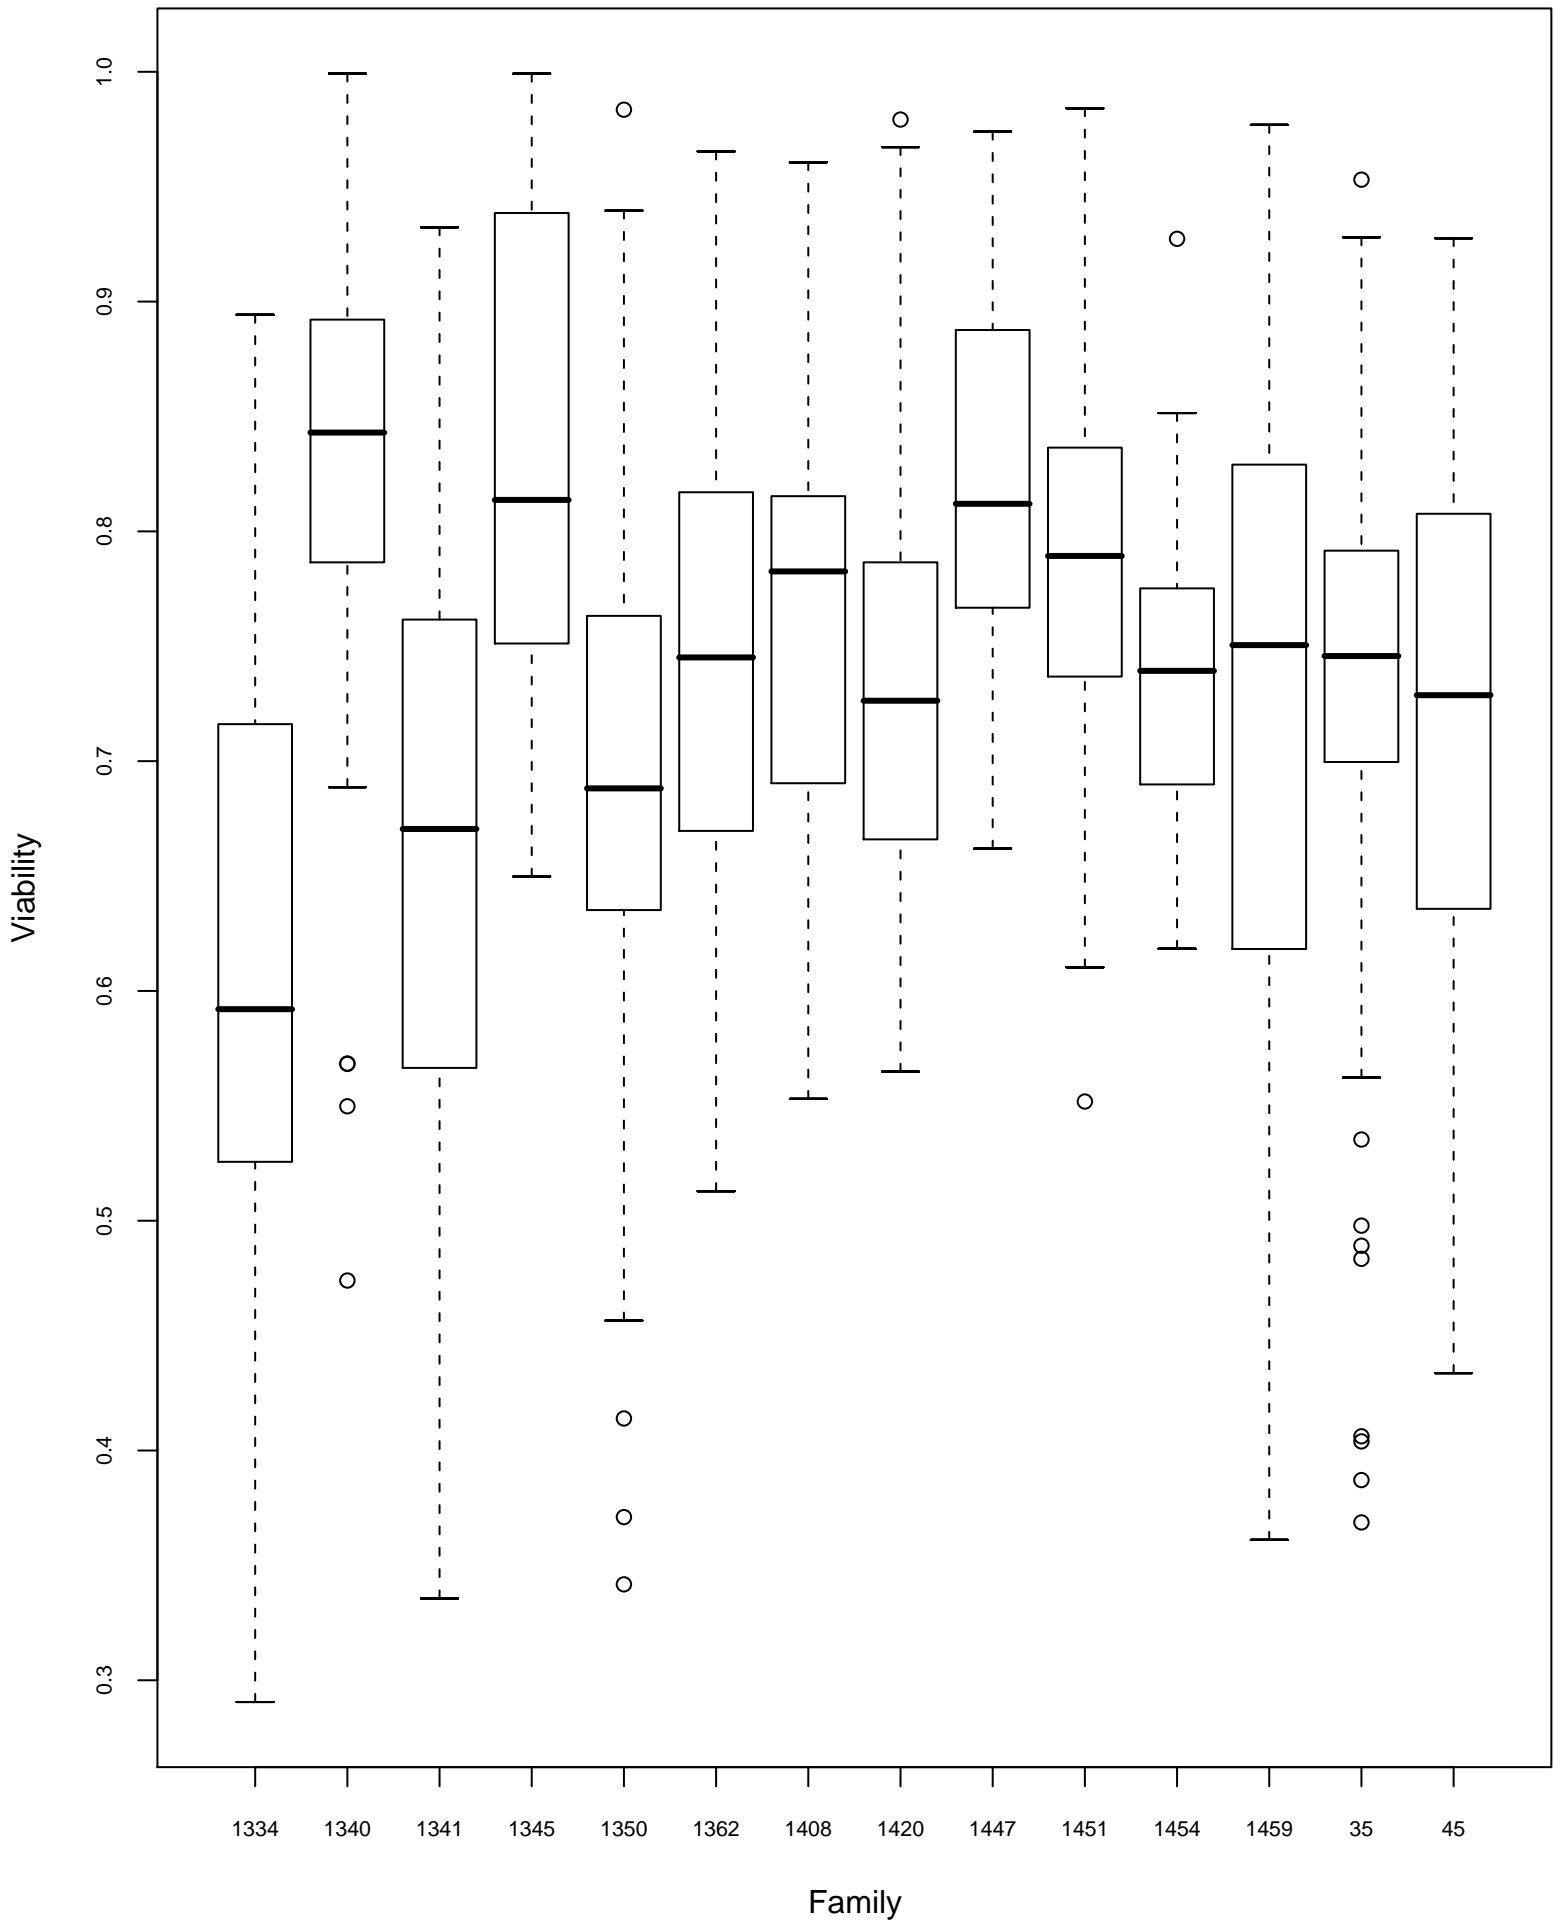

# Drug Temo, dose 0.125 (mM)

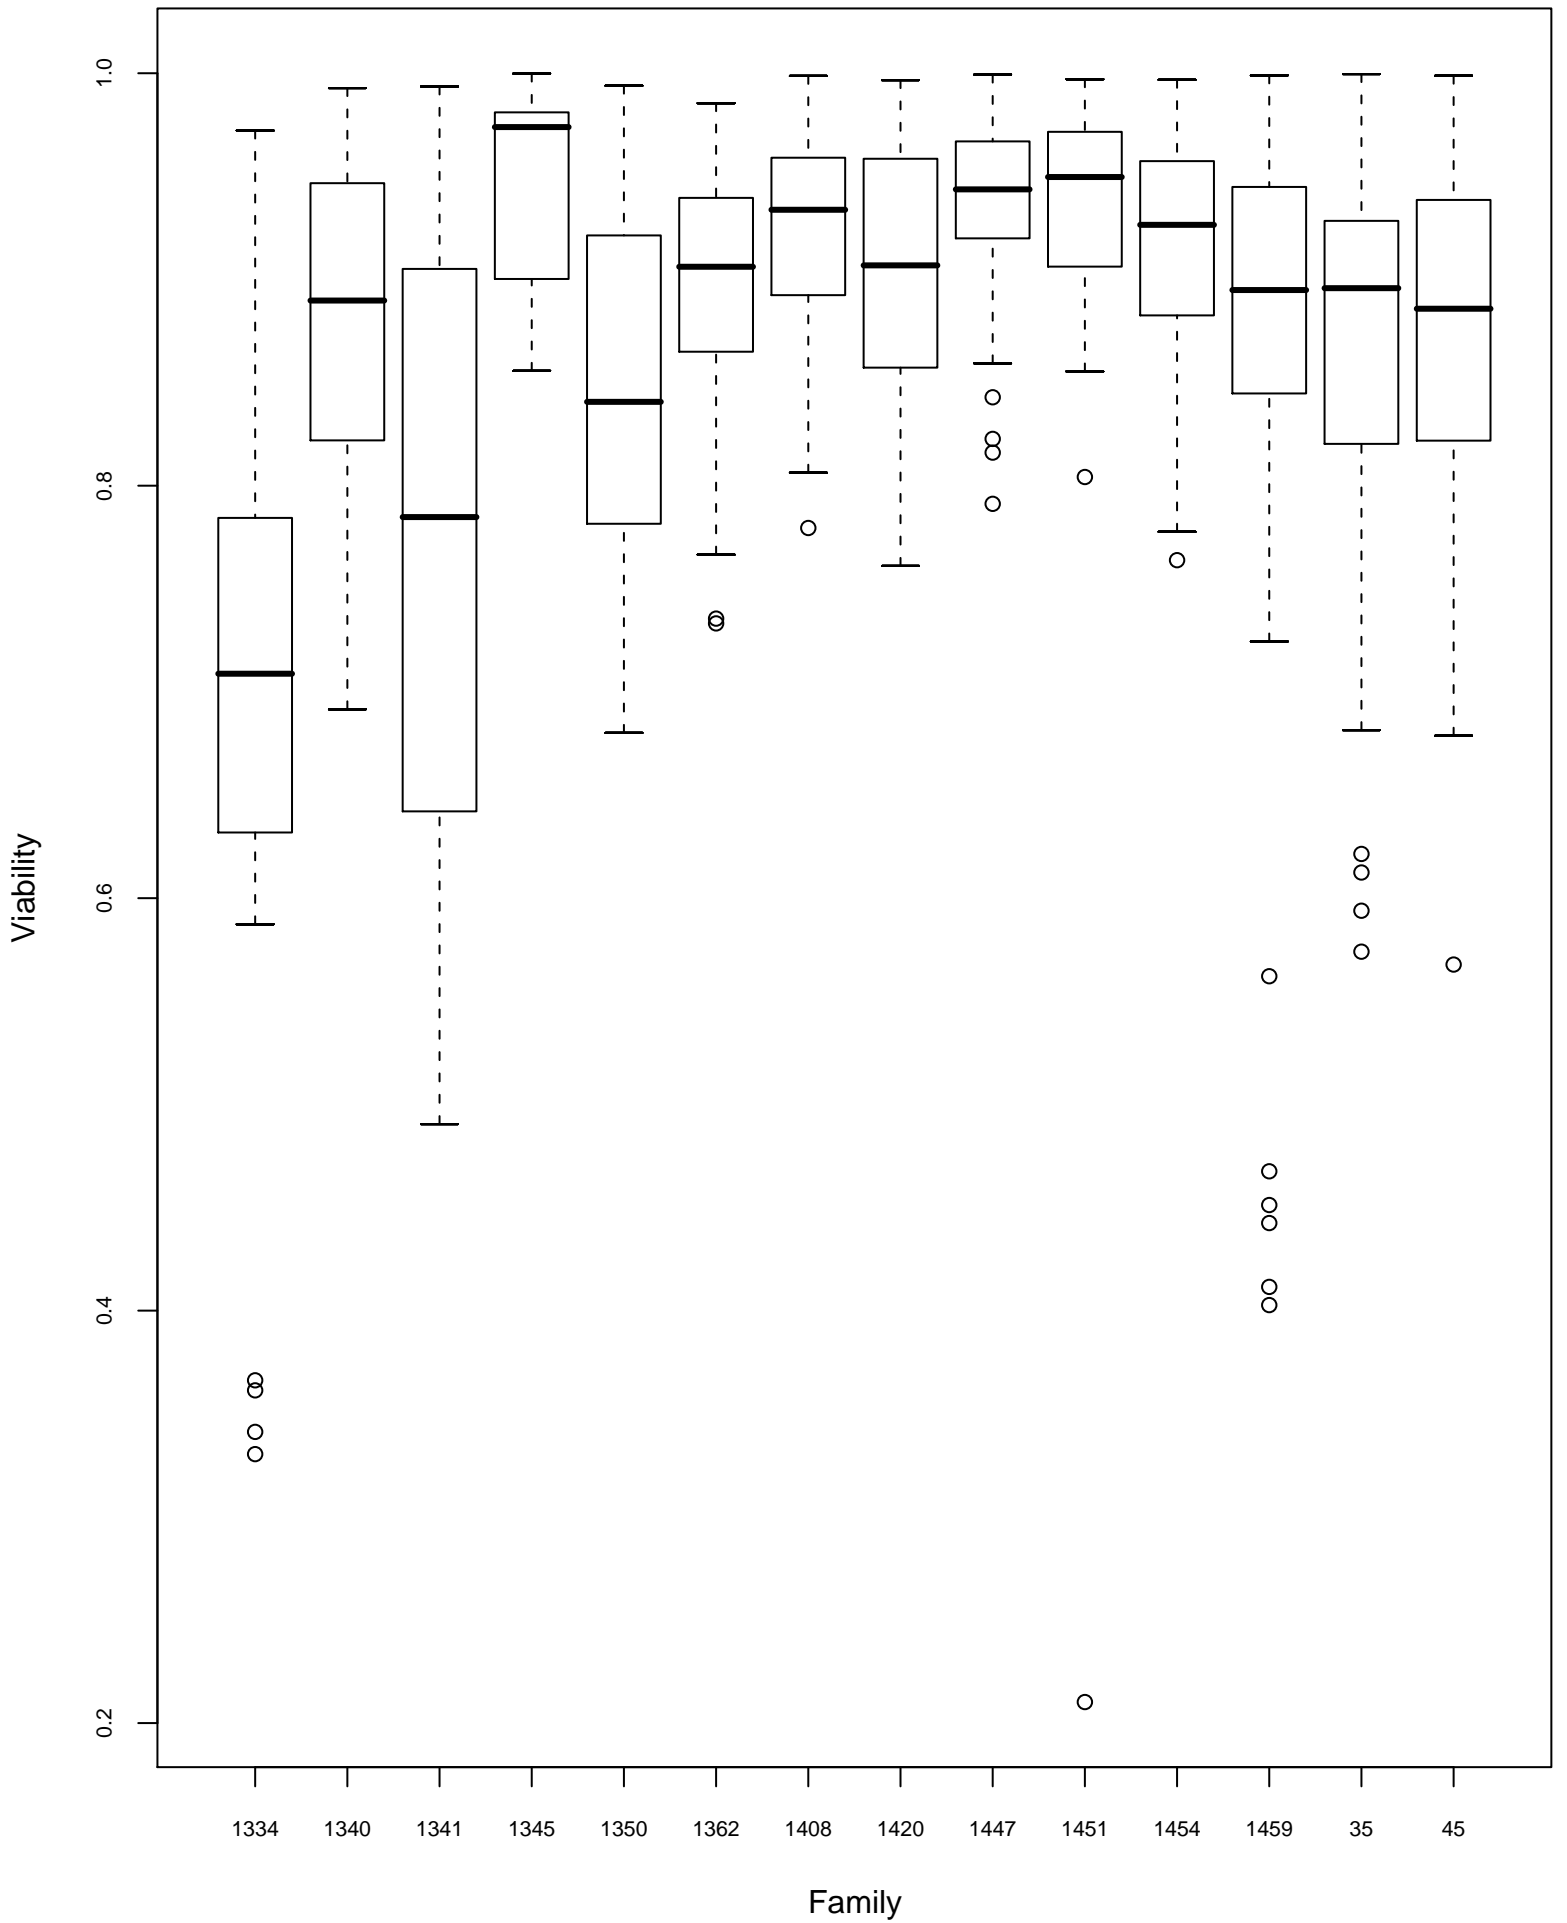



# Drug Teni, dose 0.004 (mM)

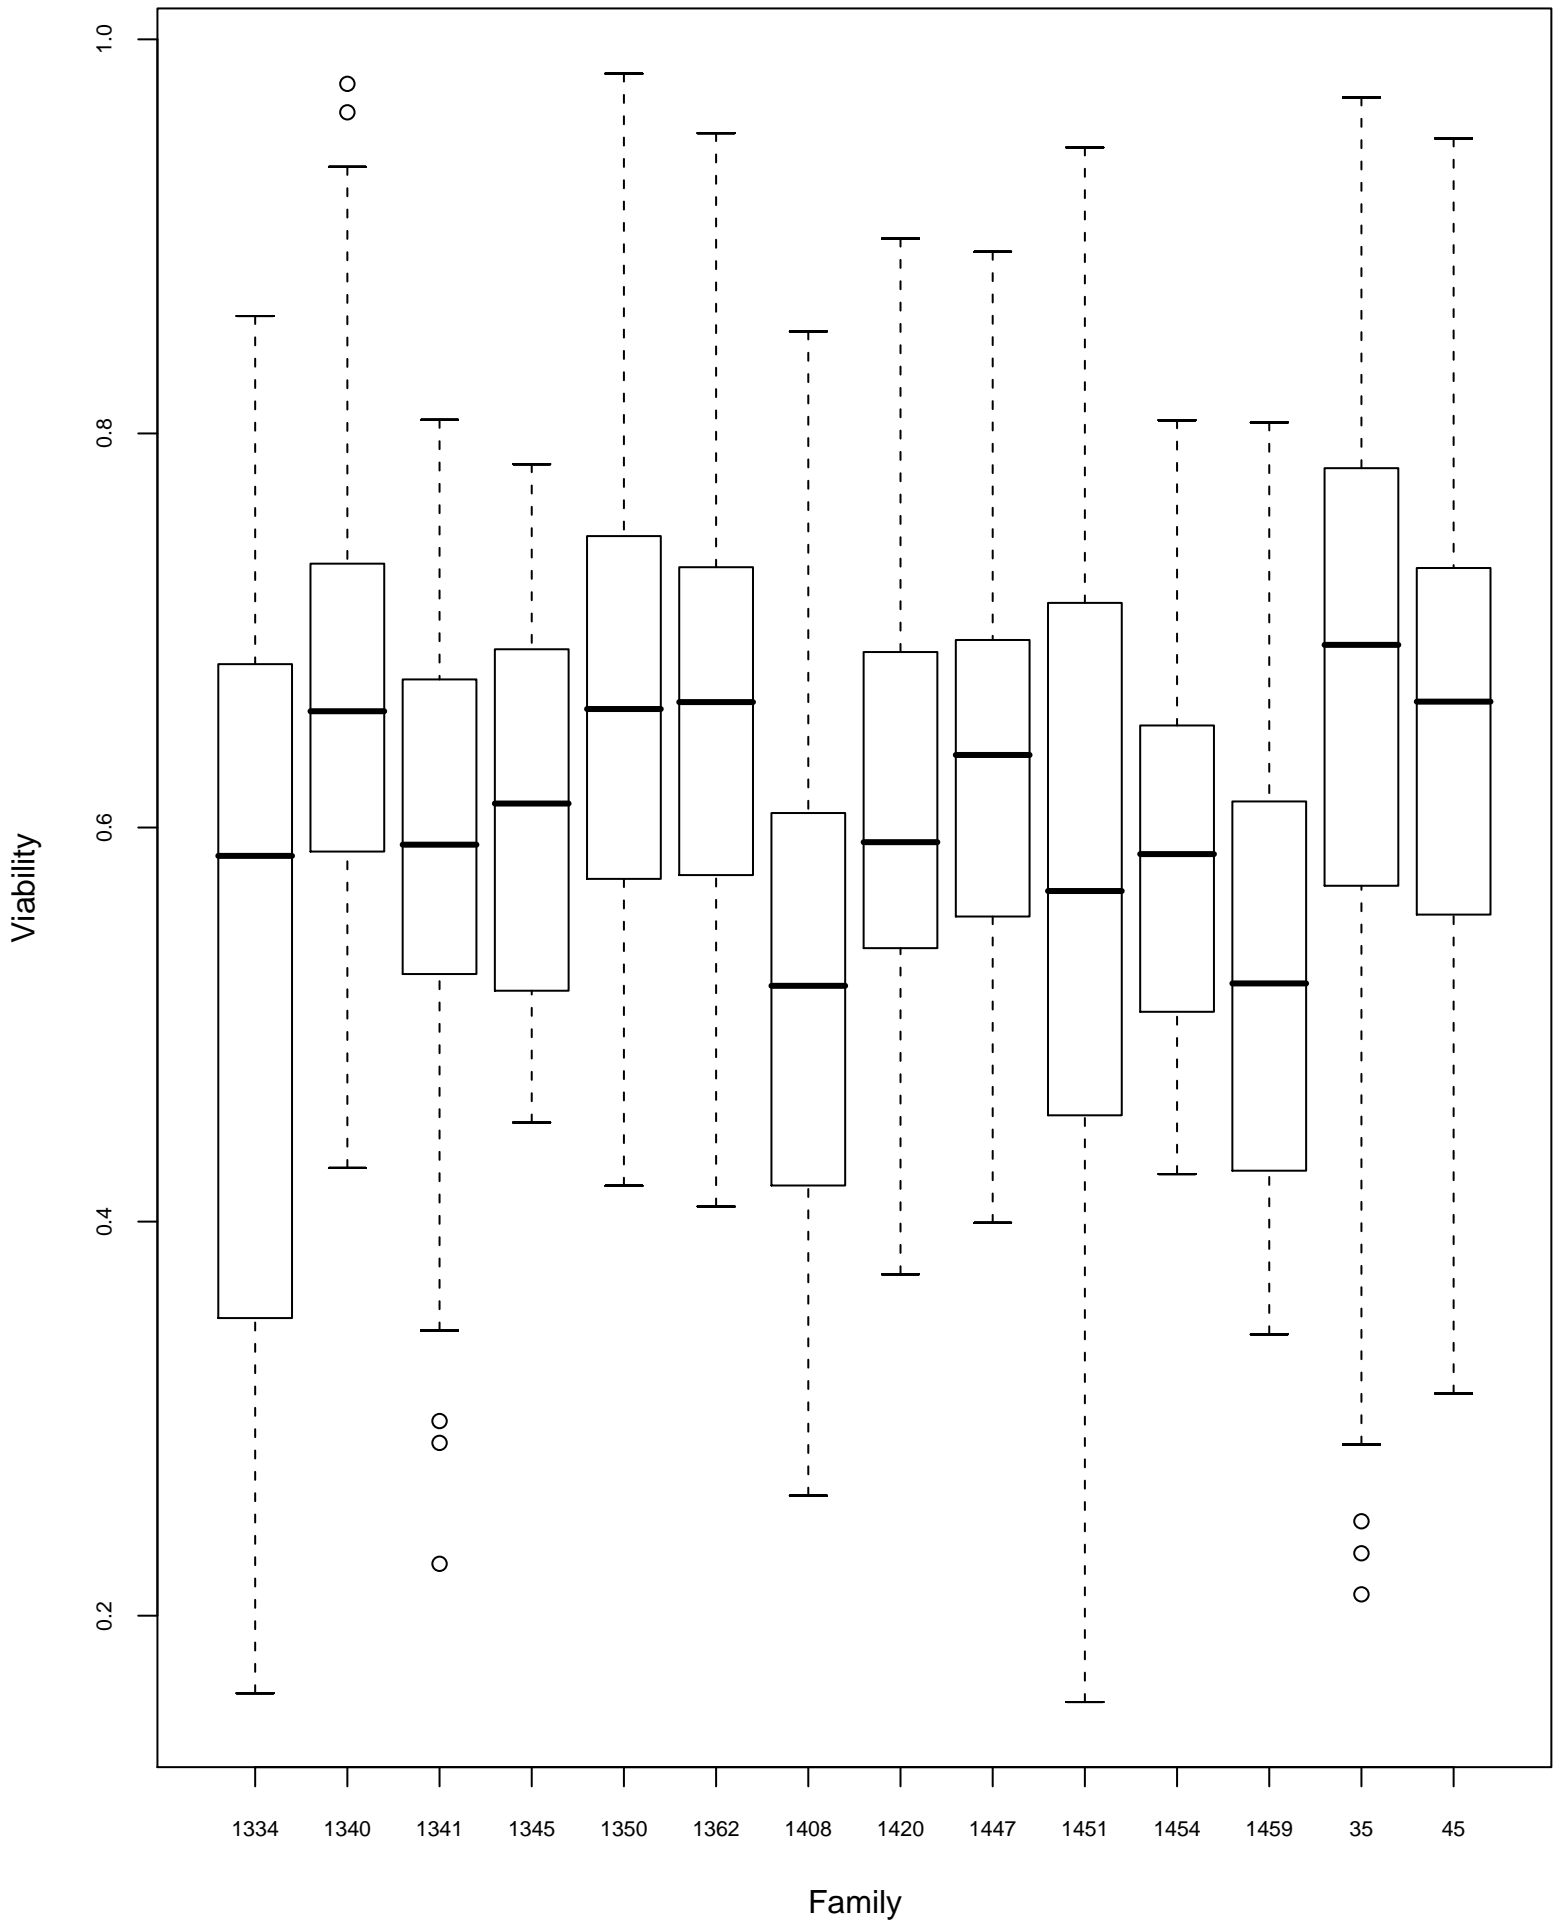

# Drug Teni, dose 0.0016 (mM)

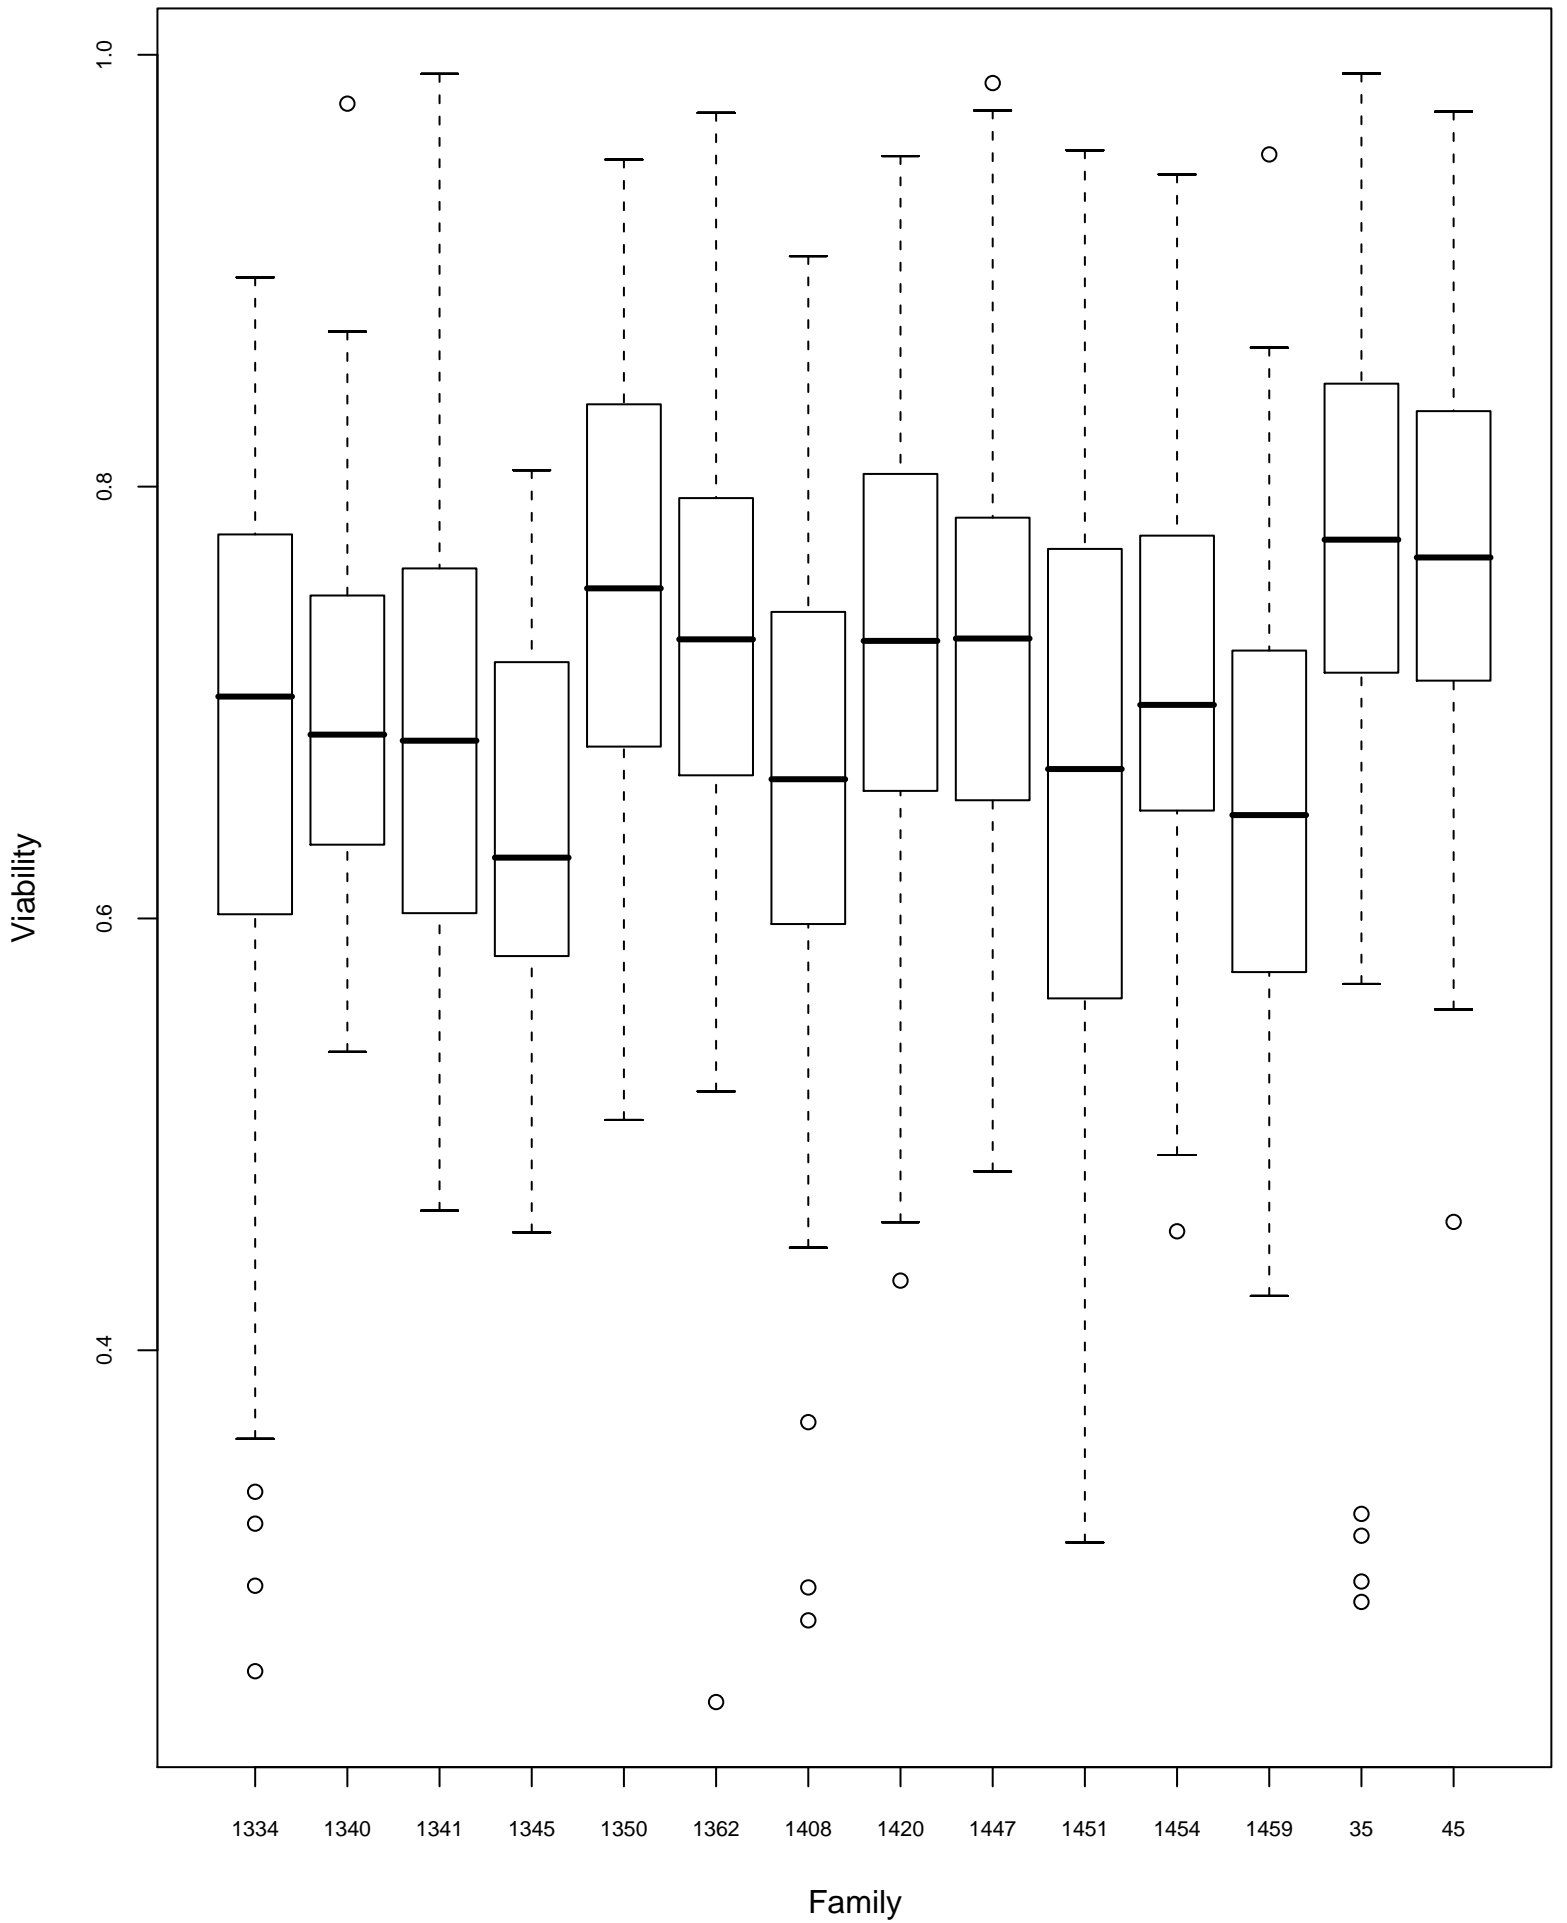

# Drug Teni, dose 0.00064 (mM)

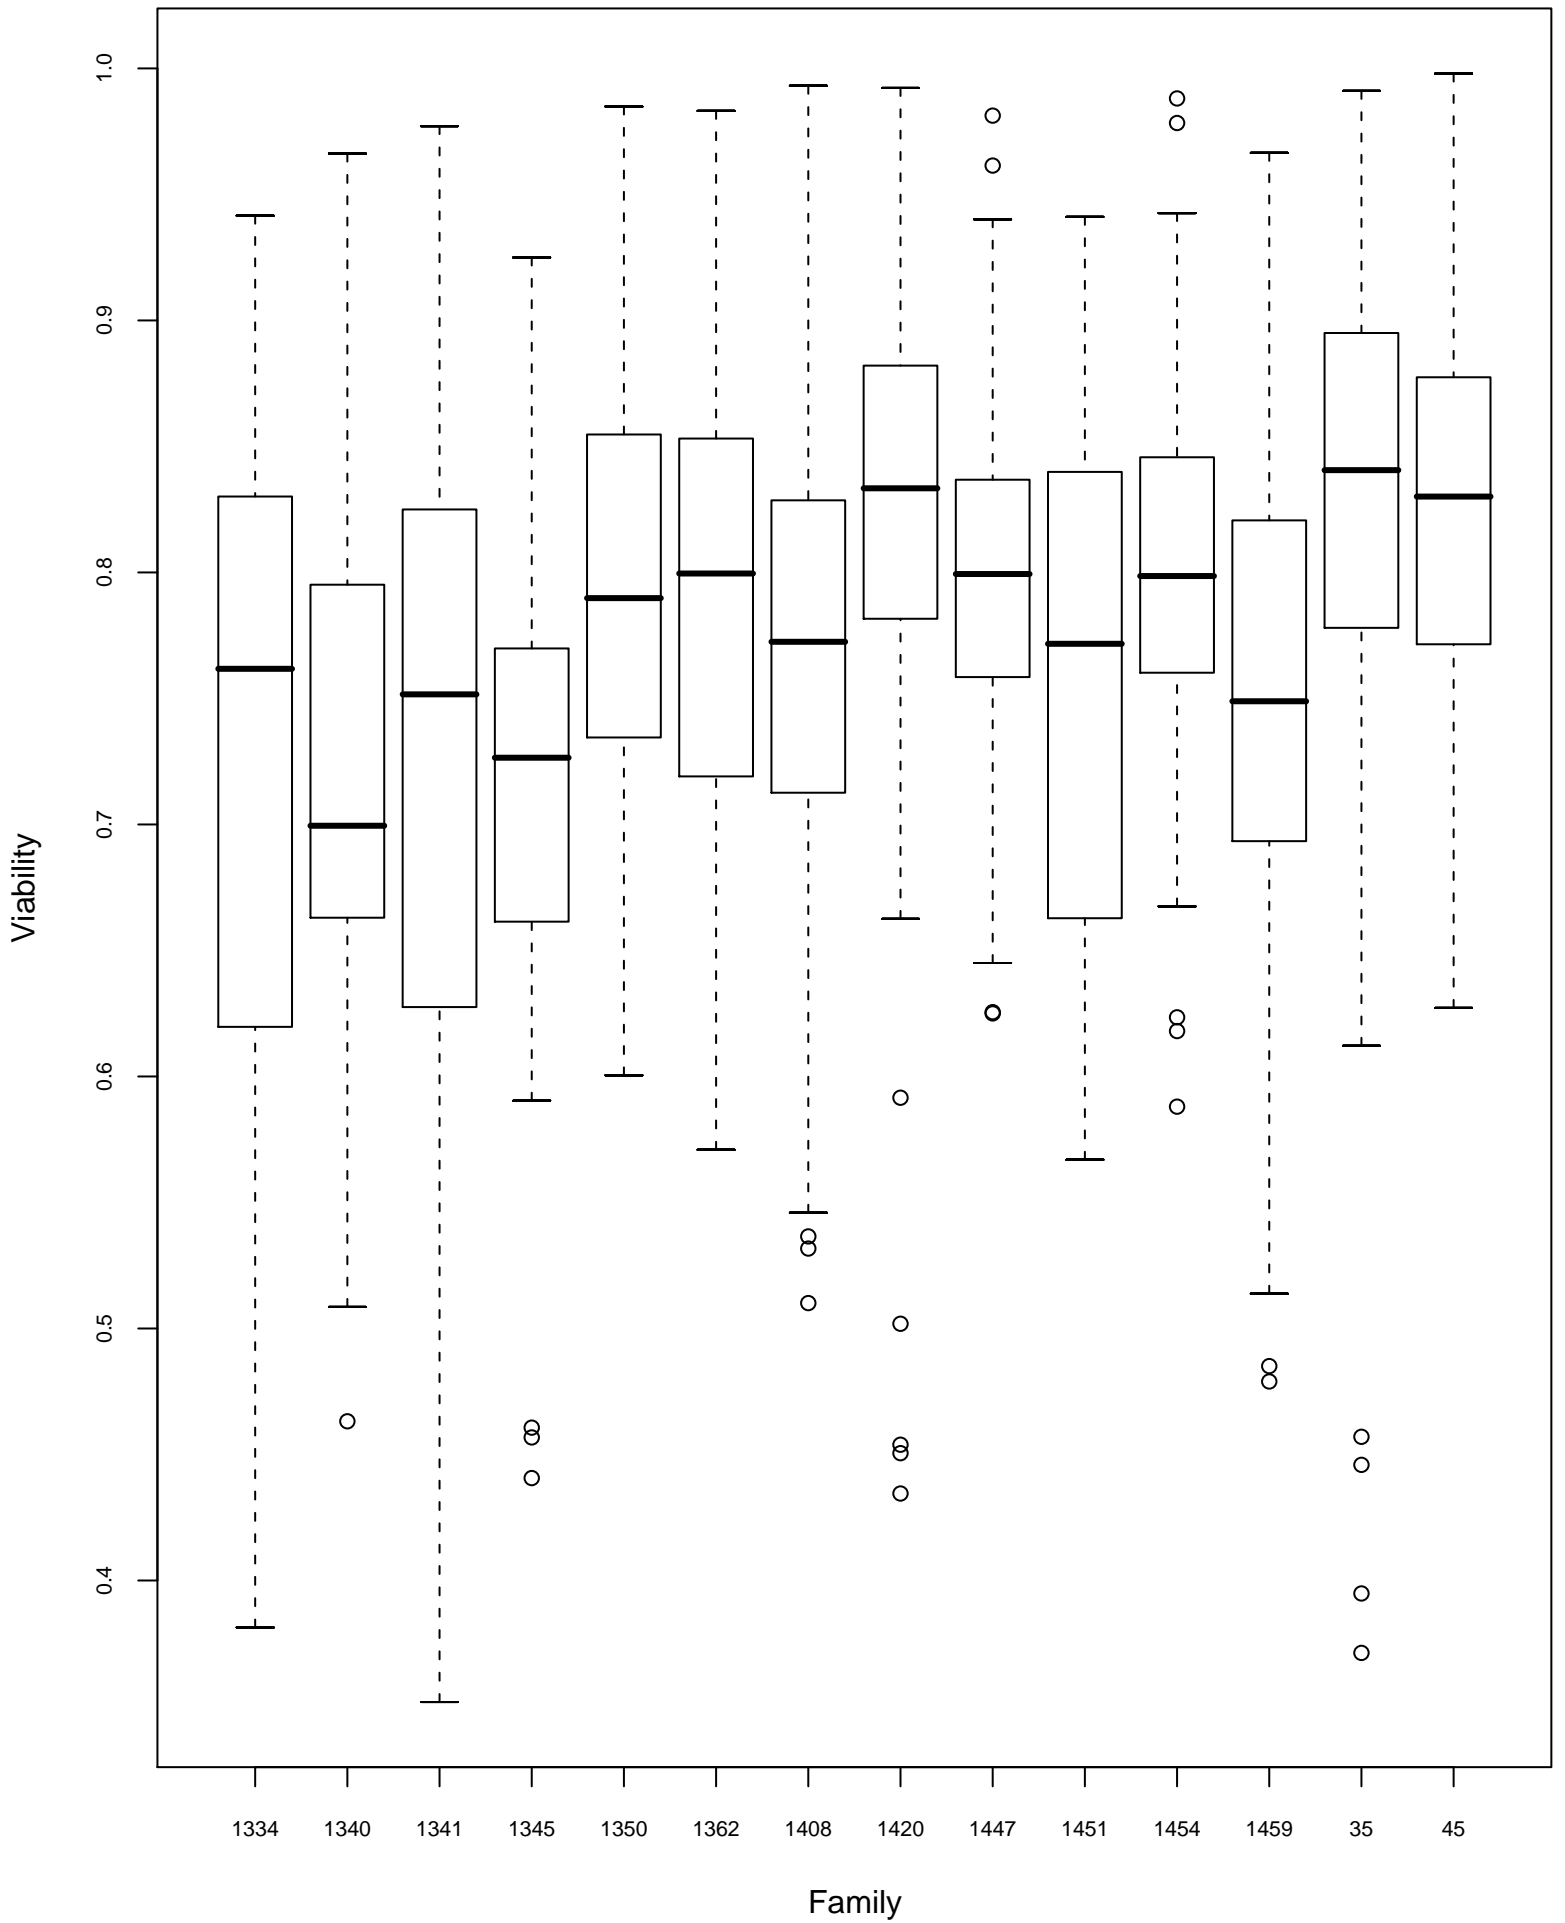

# Drug Teni, dose 0.000256 (mM)

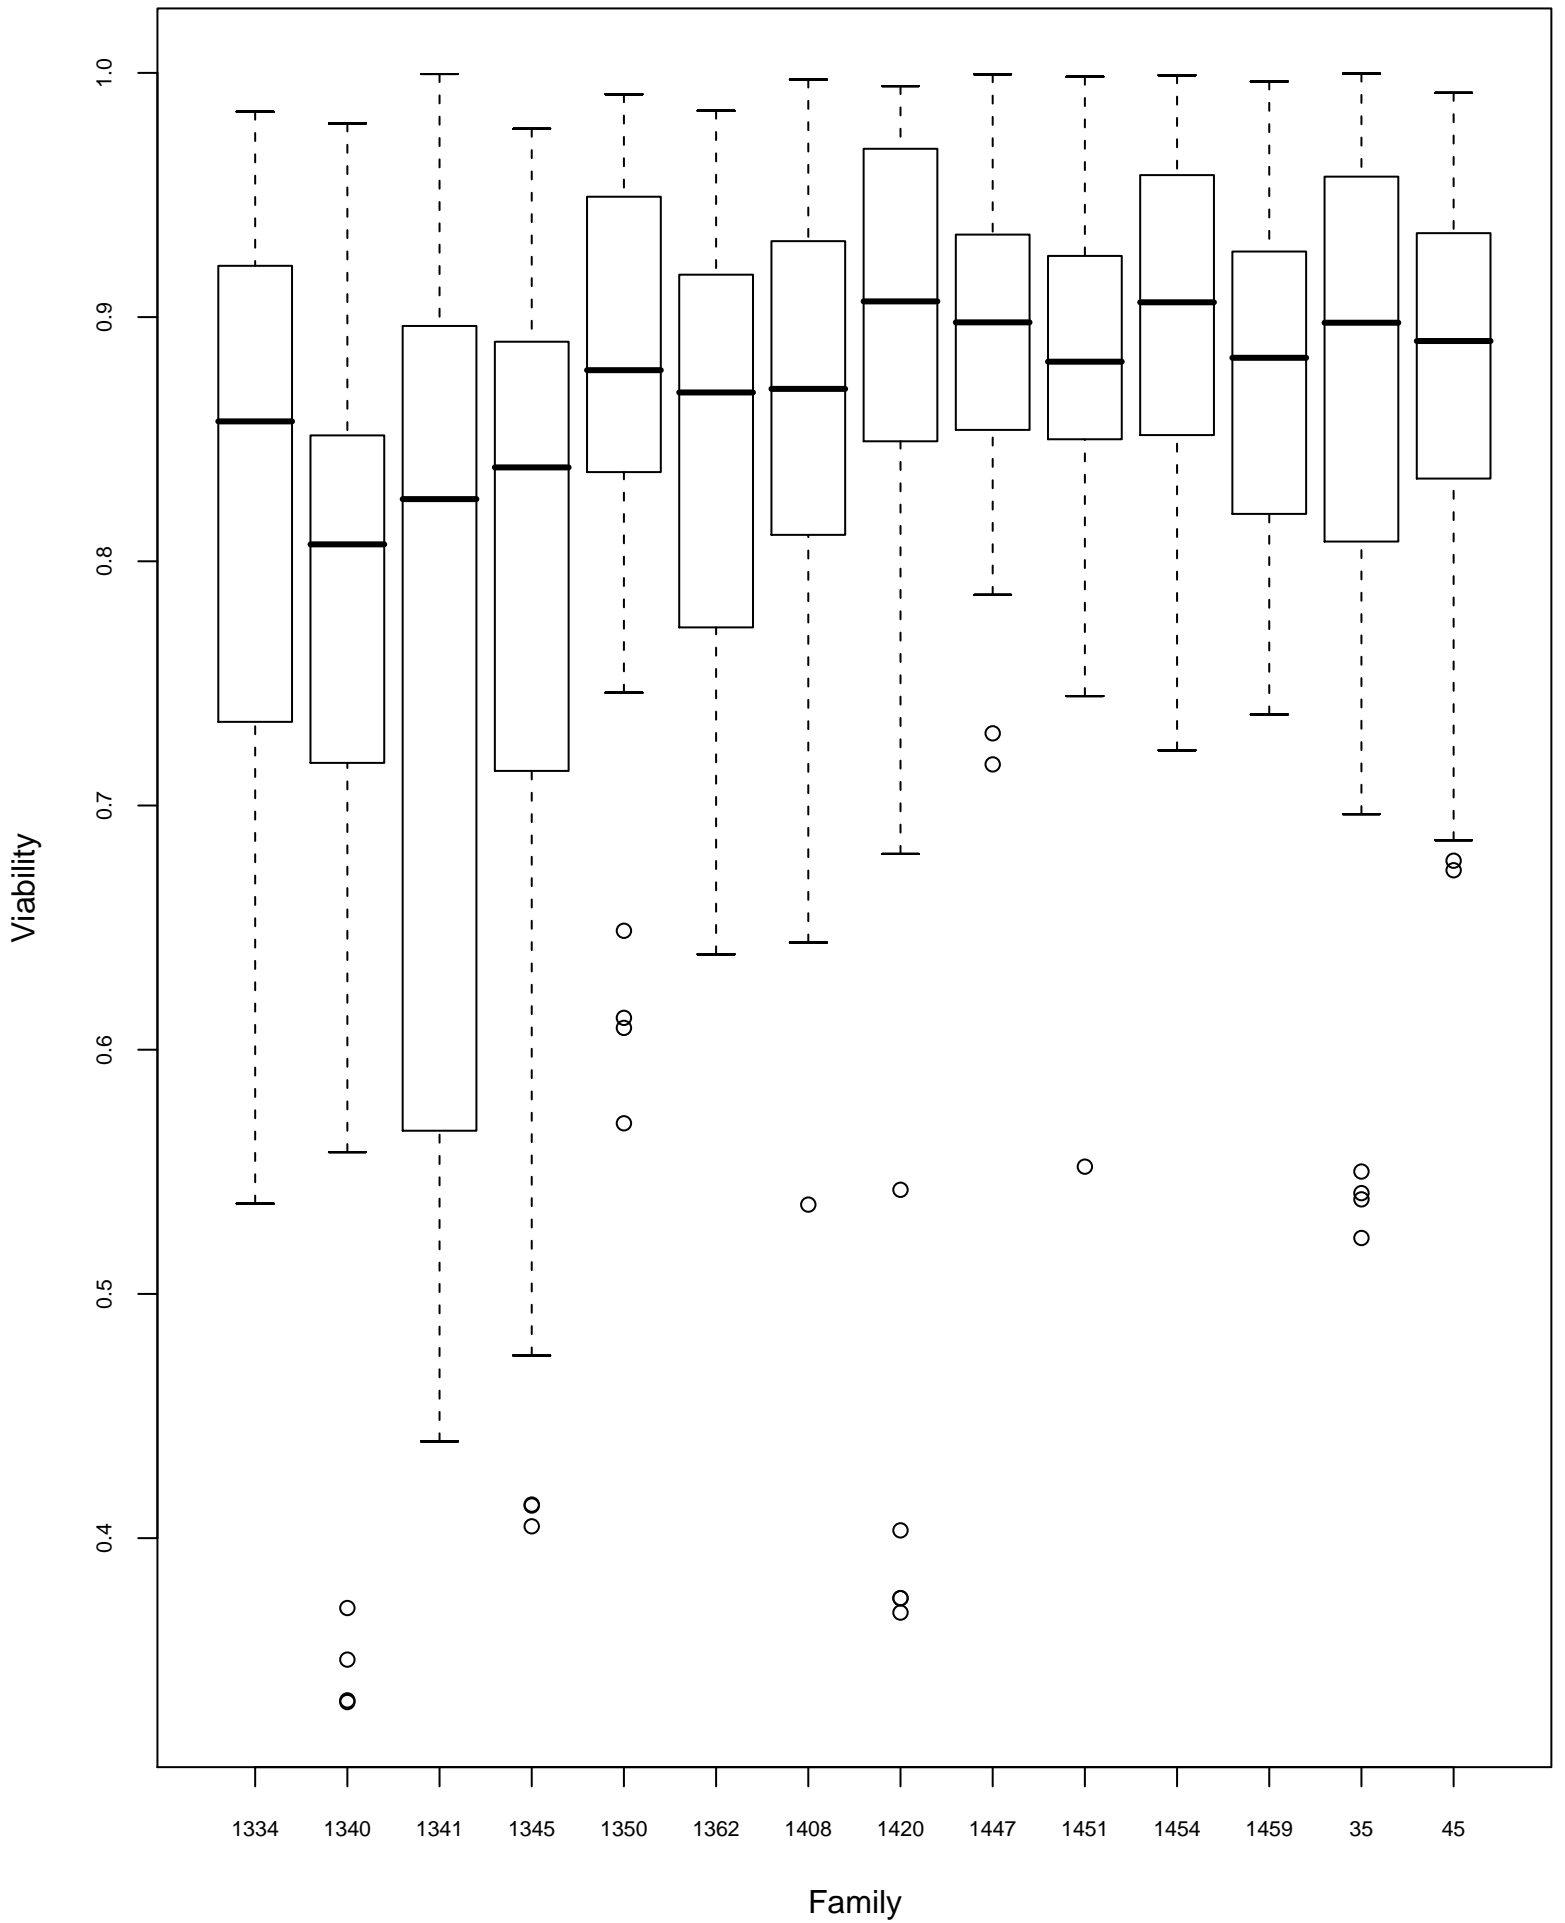

# Drug Topo, dose 3e-05 (mM)

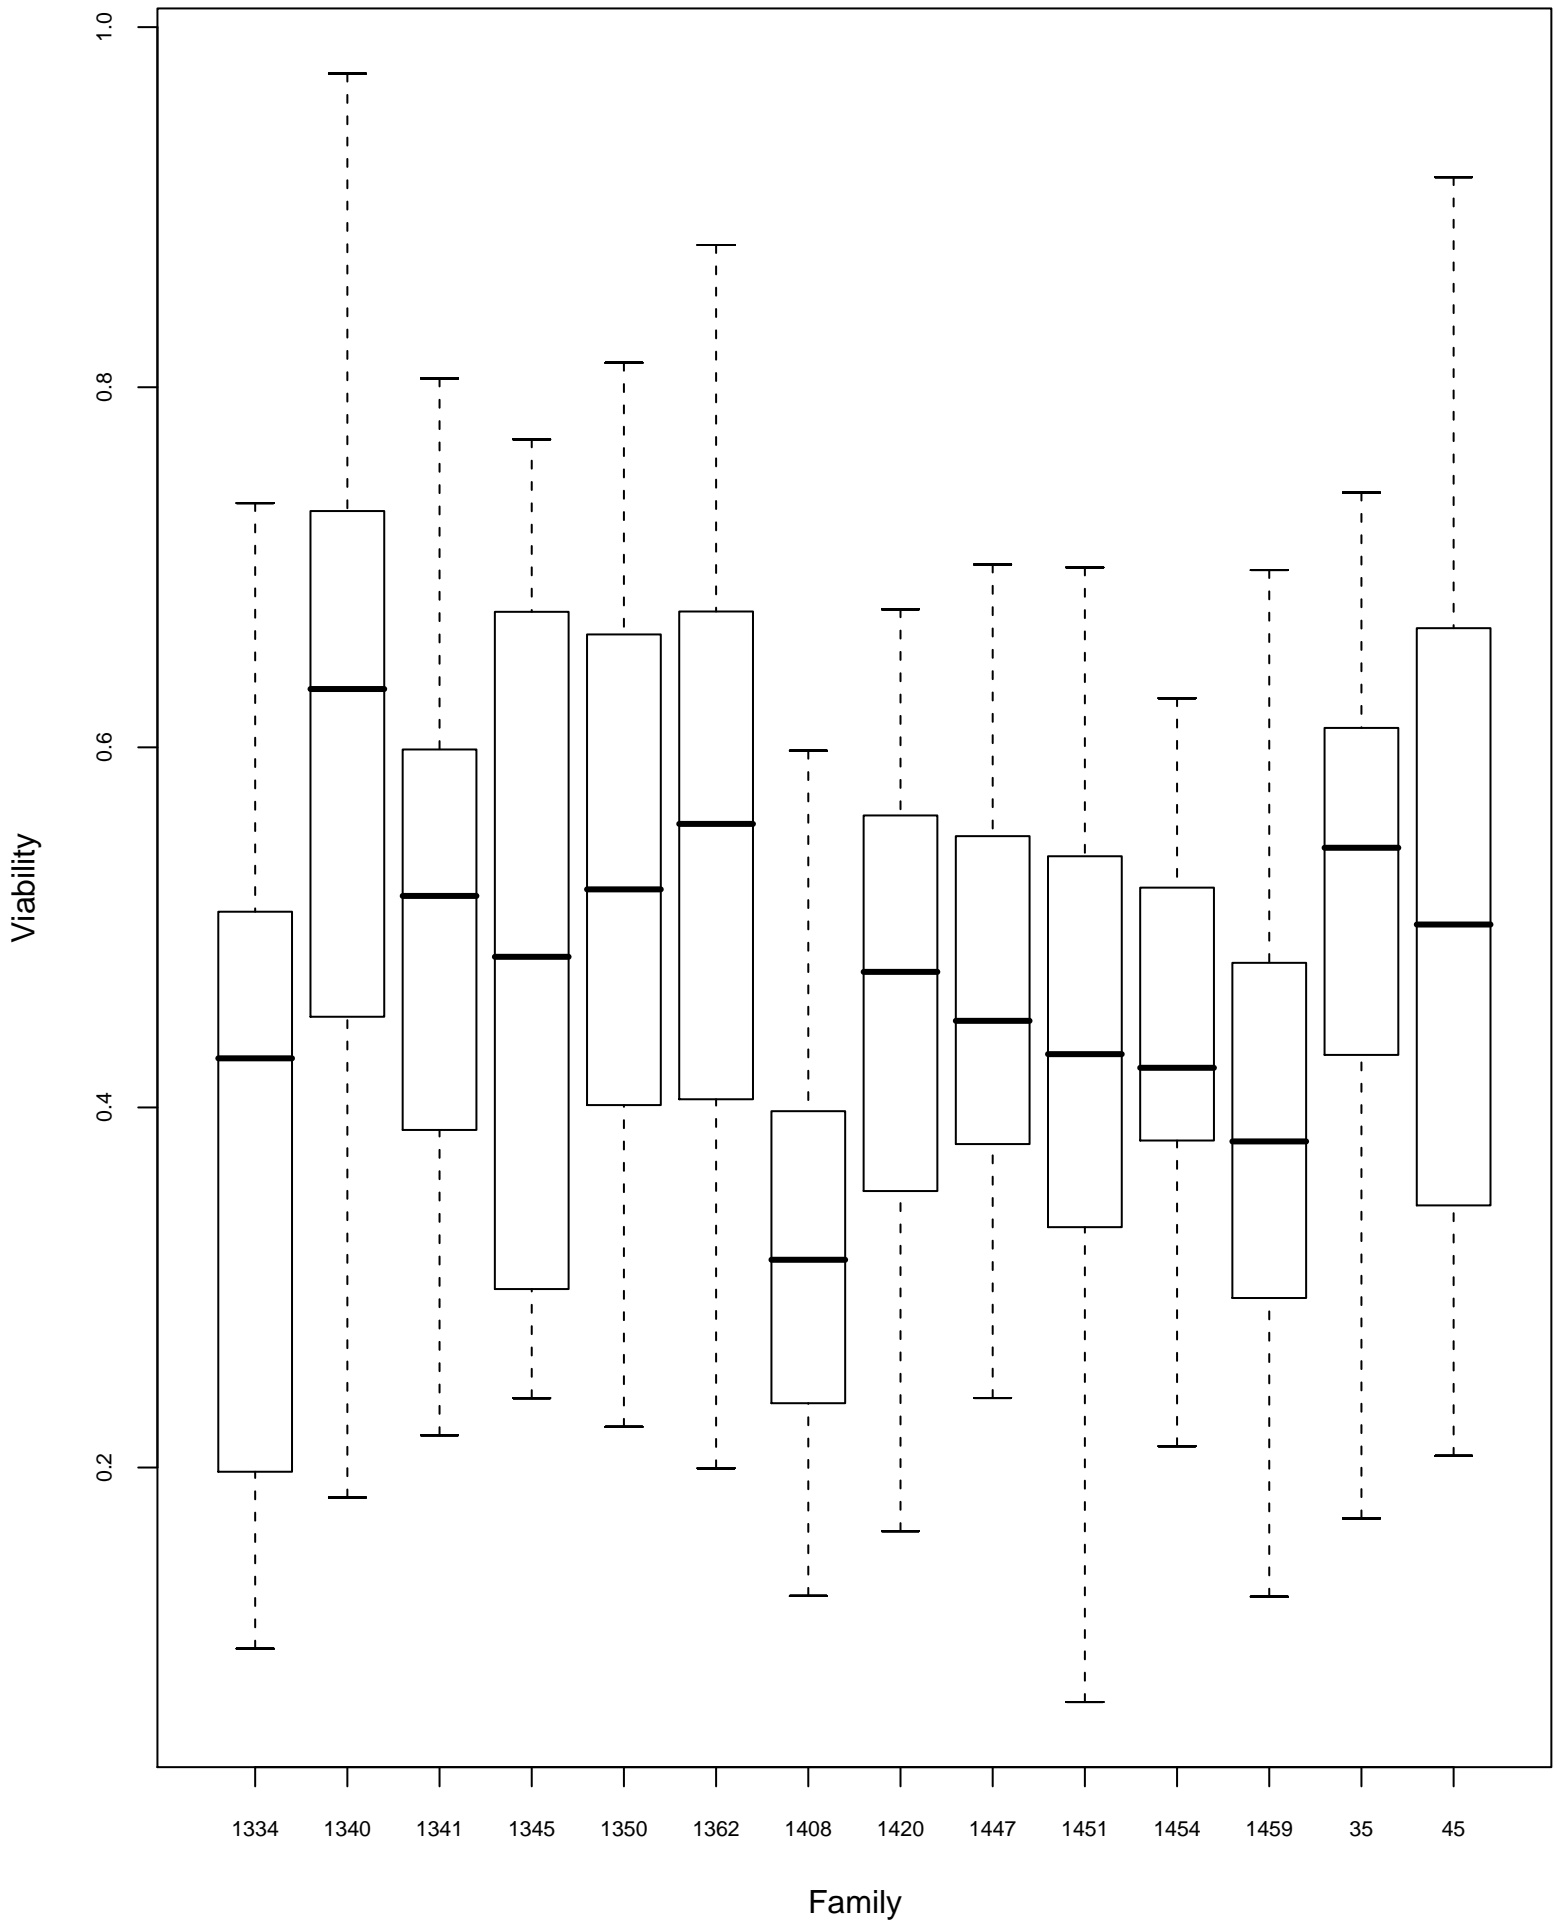

# Drug Topo, dose 1.4e-05 (mM)

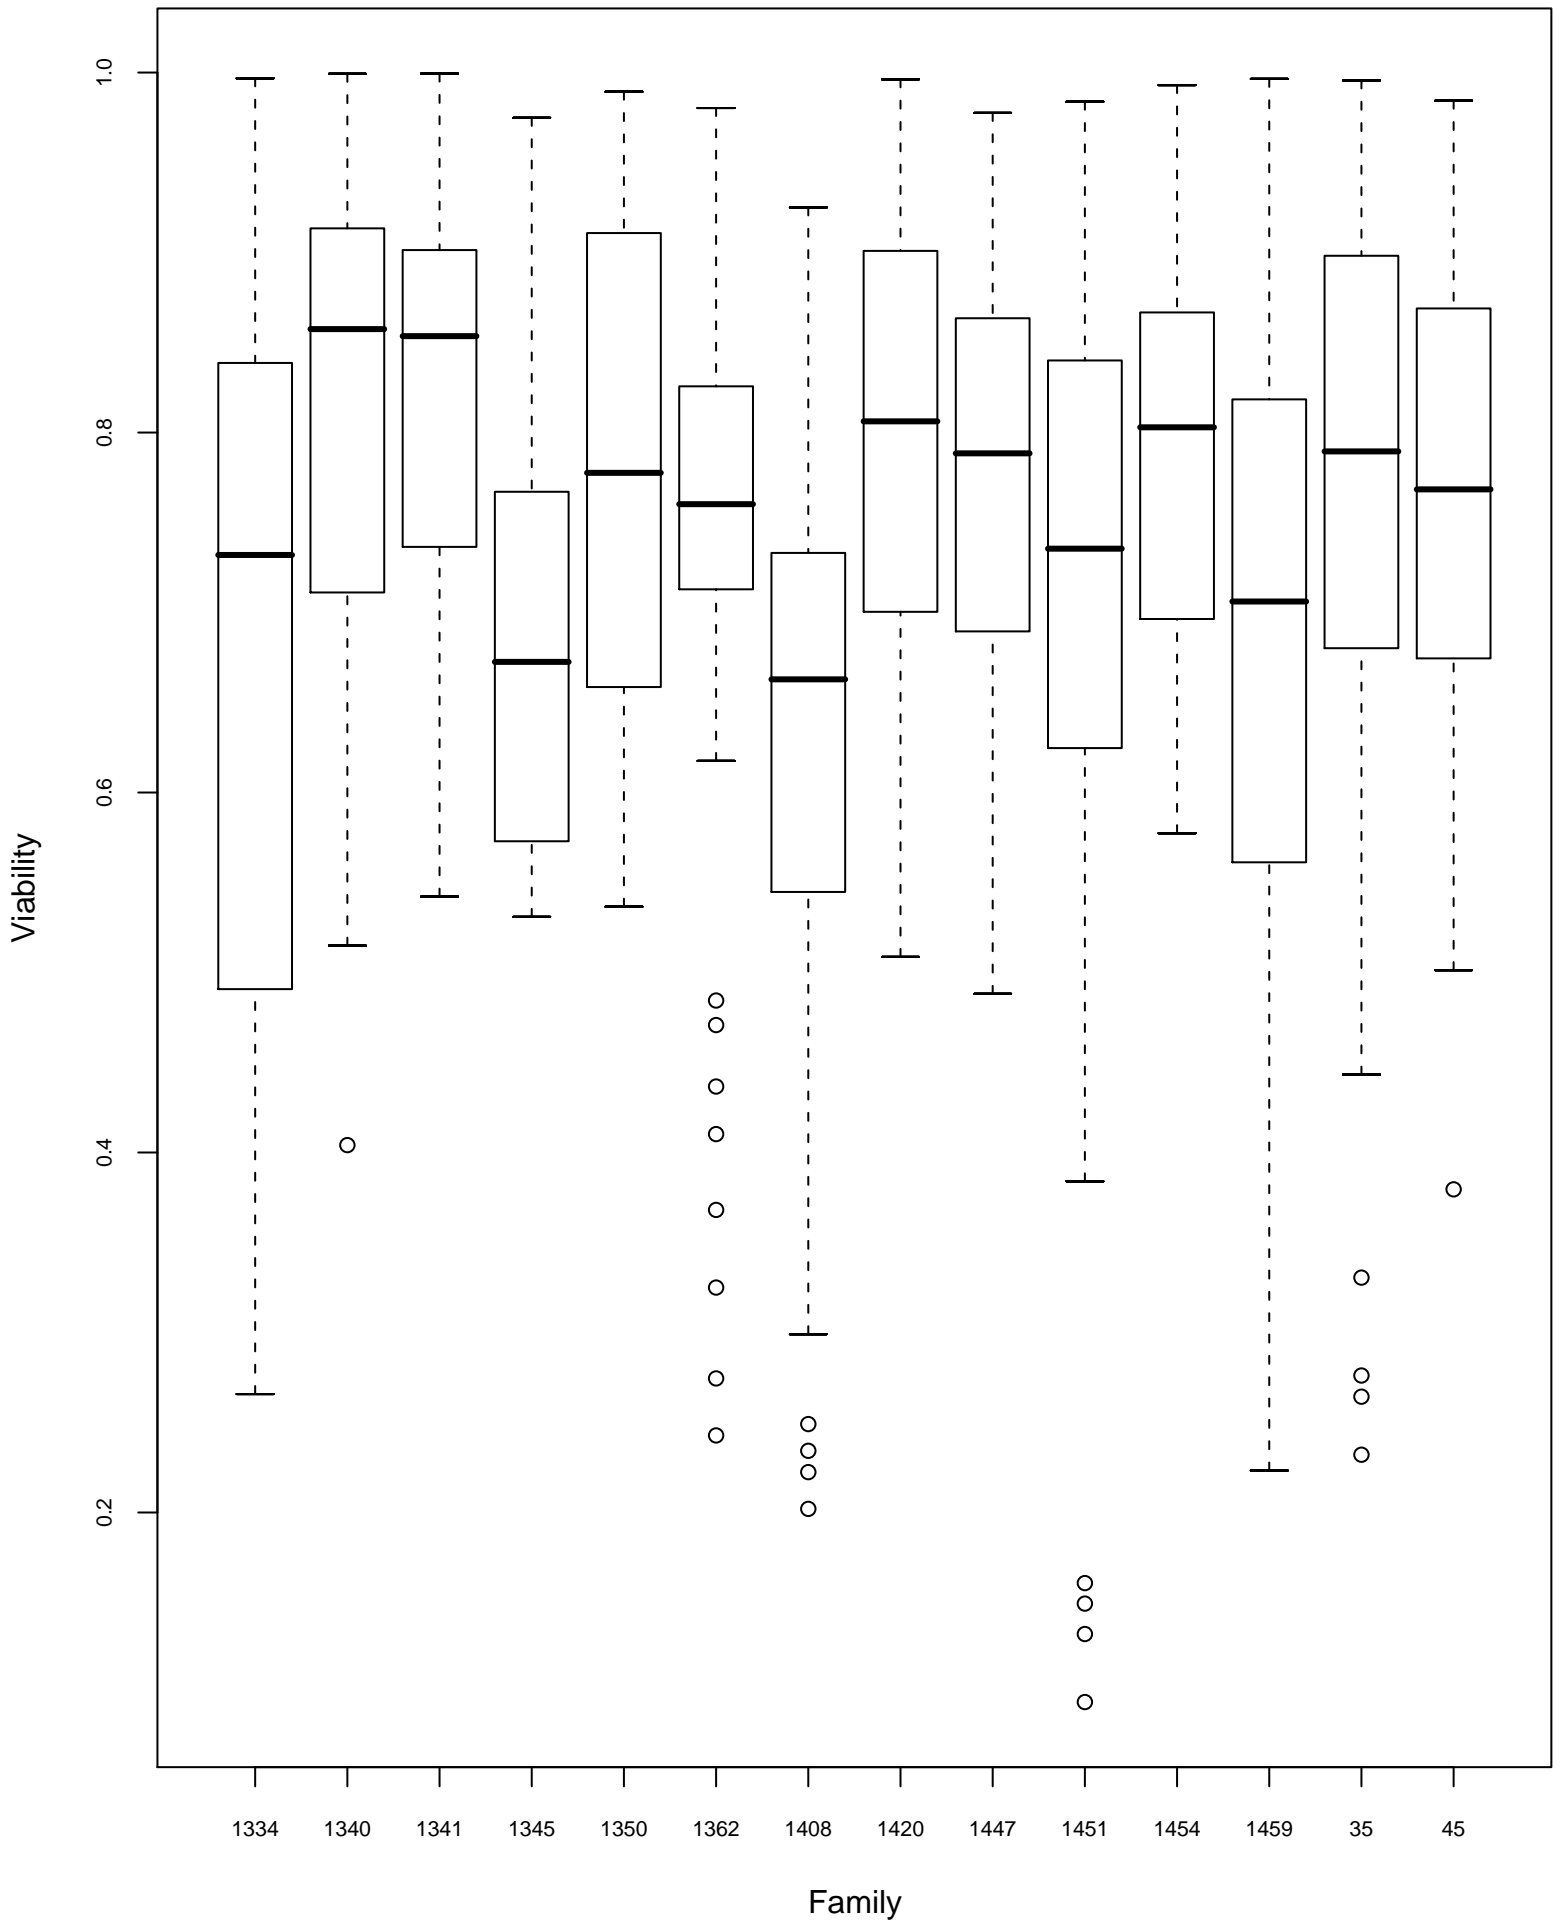

# Drug Topo, dose 6e-06 (mM)

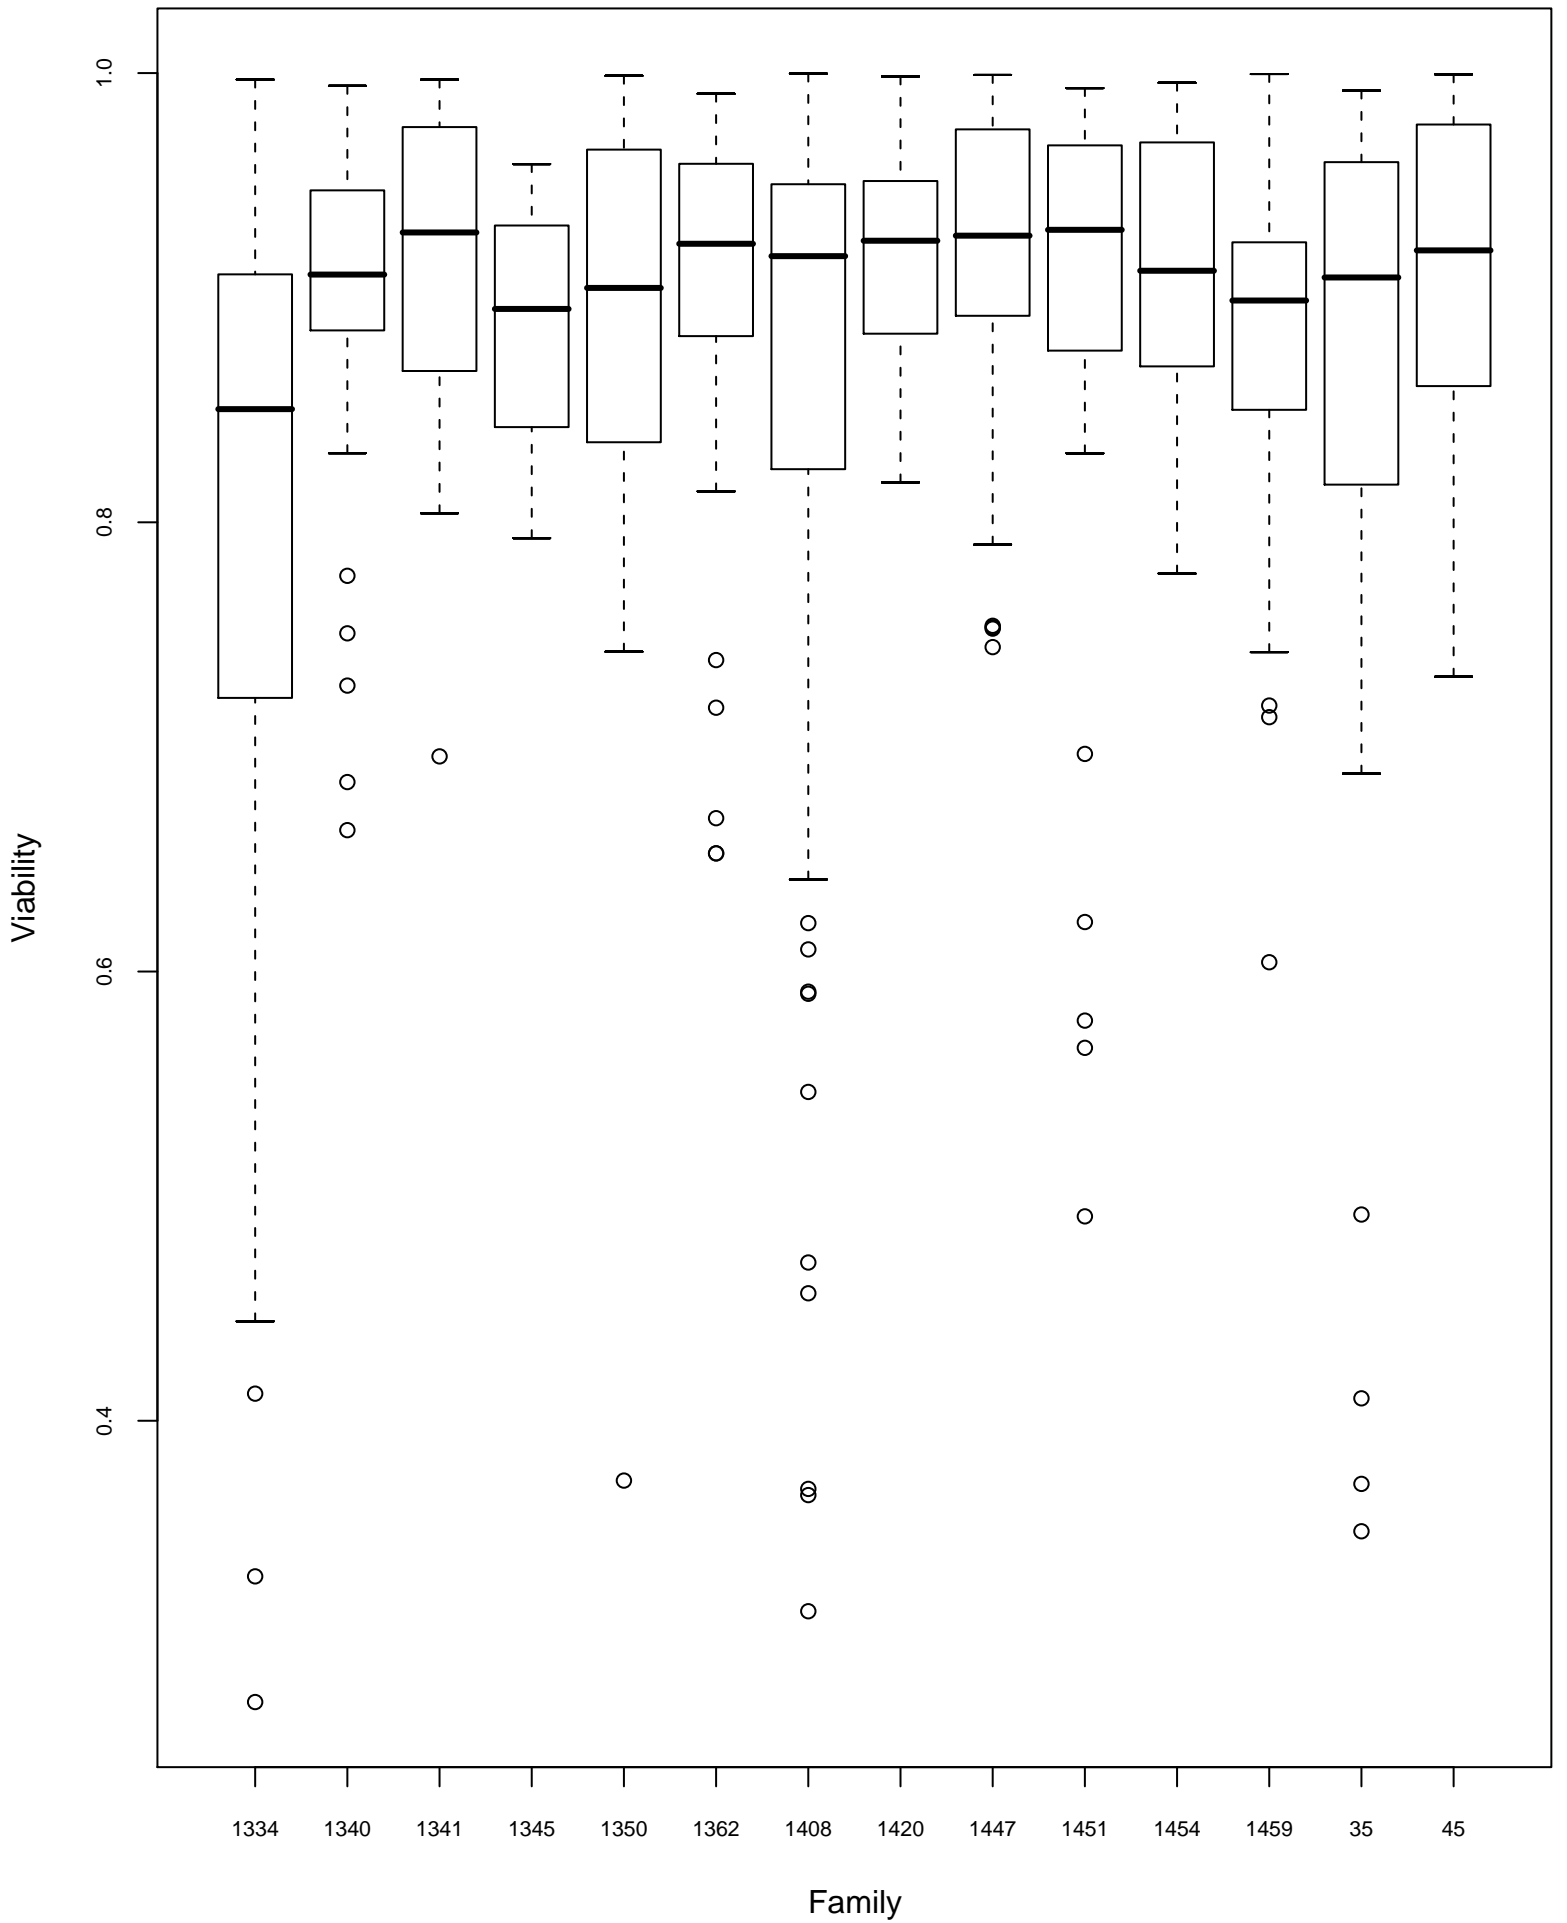

# Drug Topo, dose 3e-06 (mM)

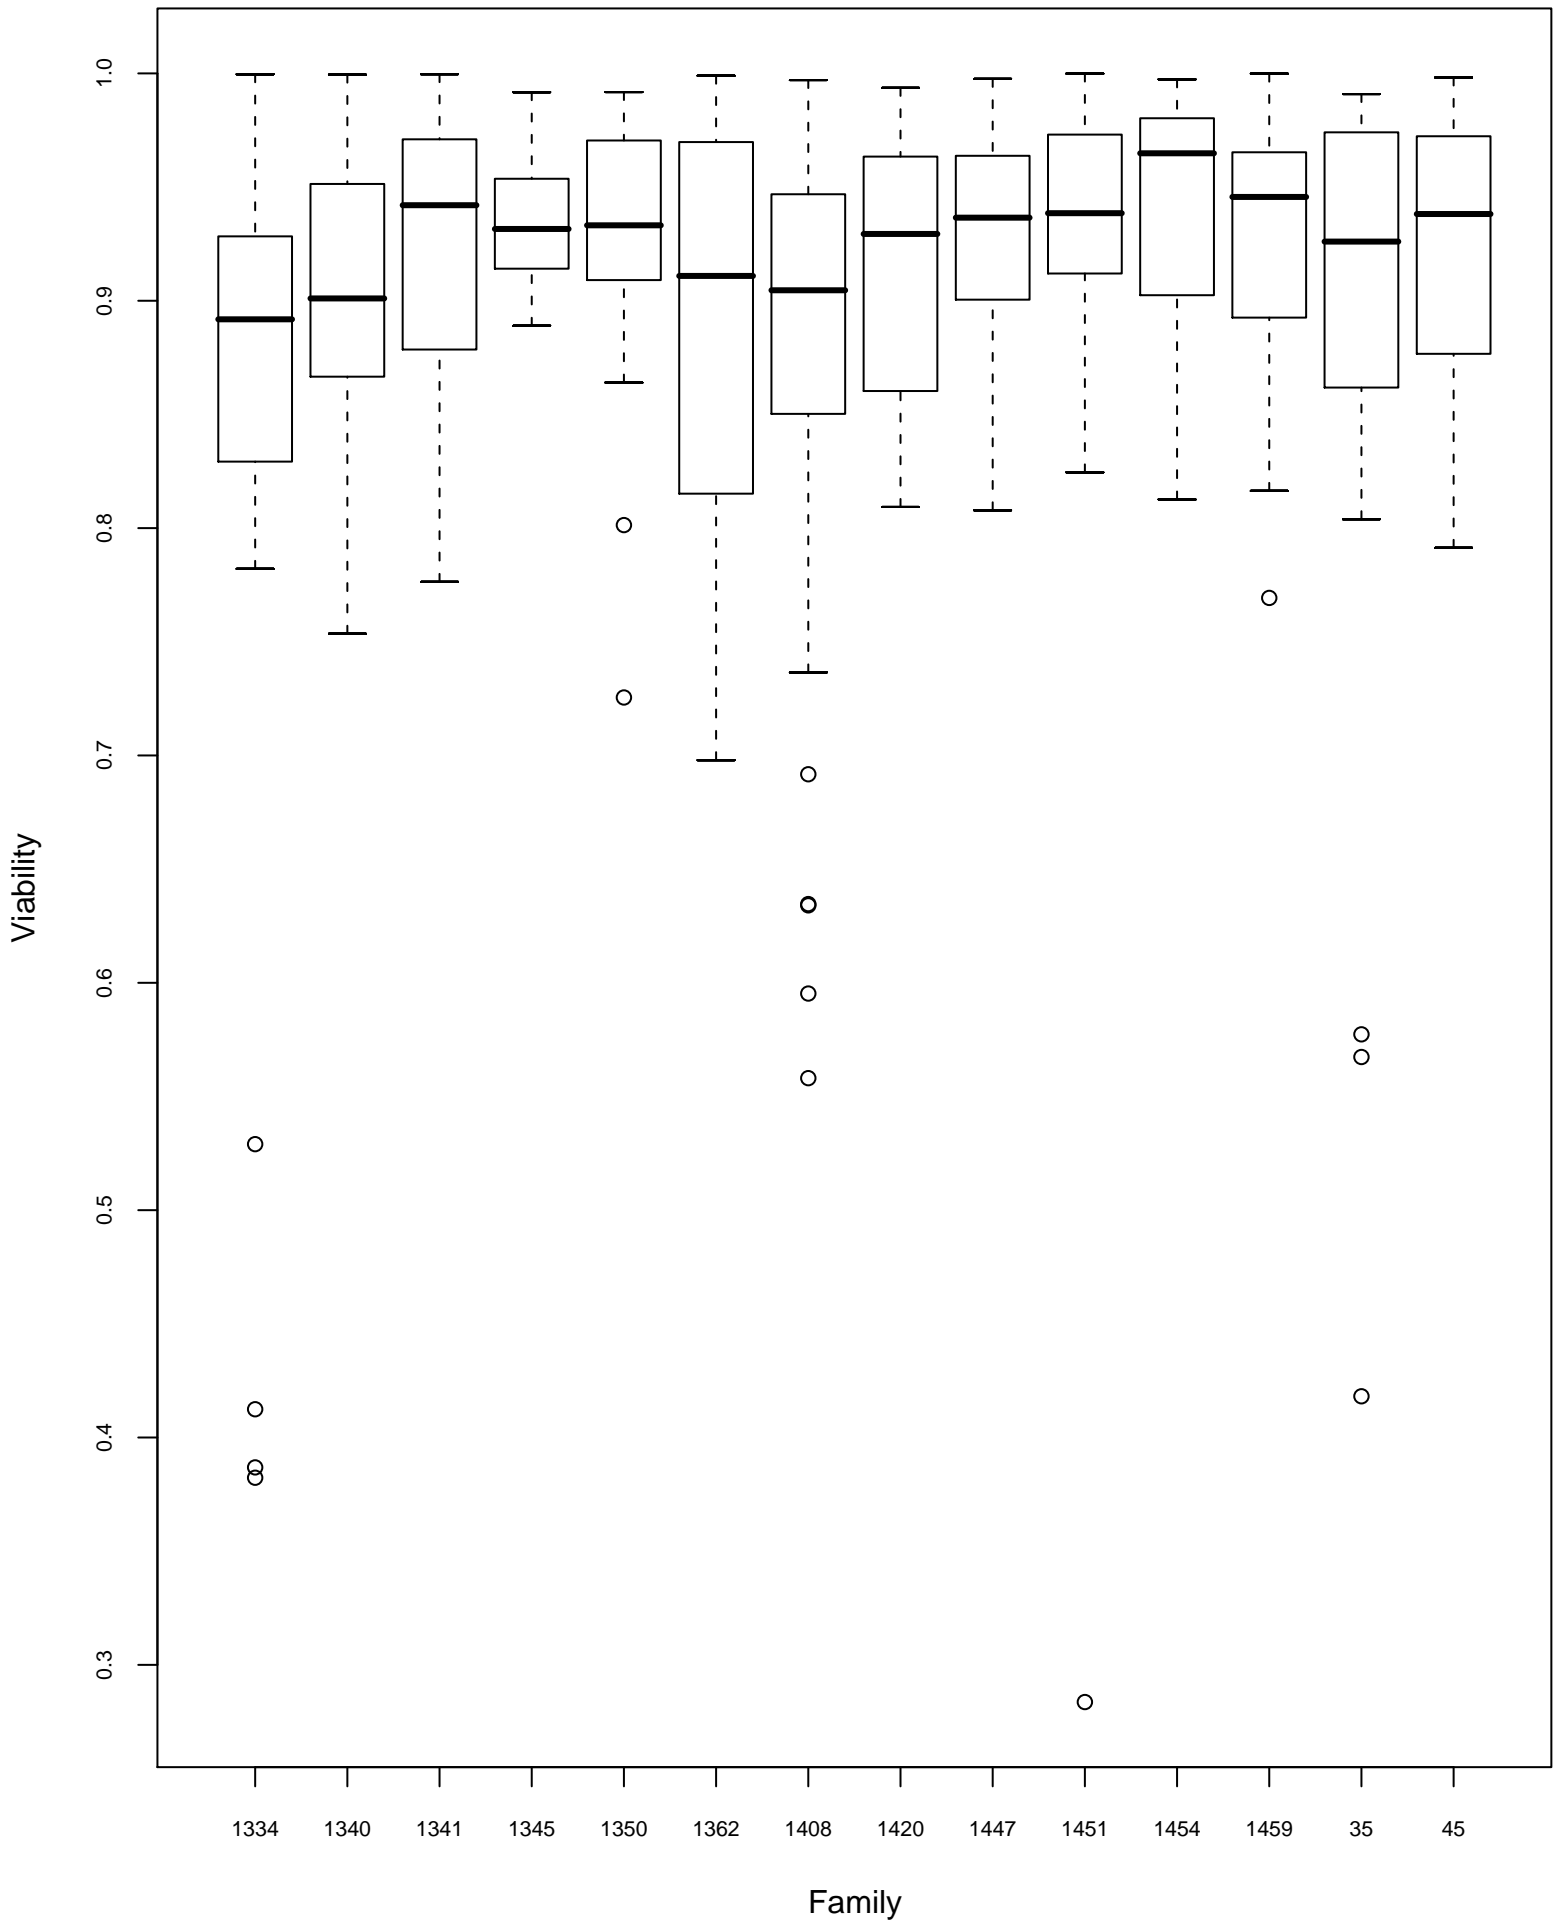



# Drug Vinb, dose 4e-05 (mM)

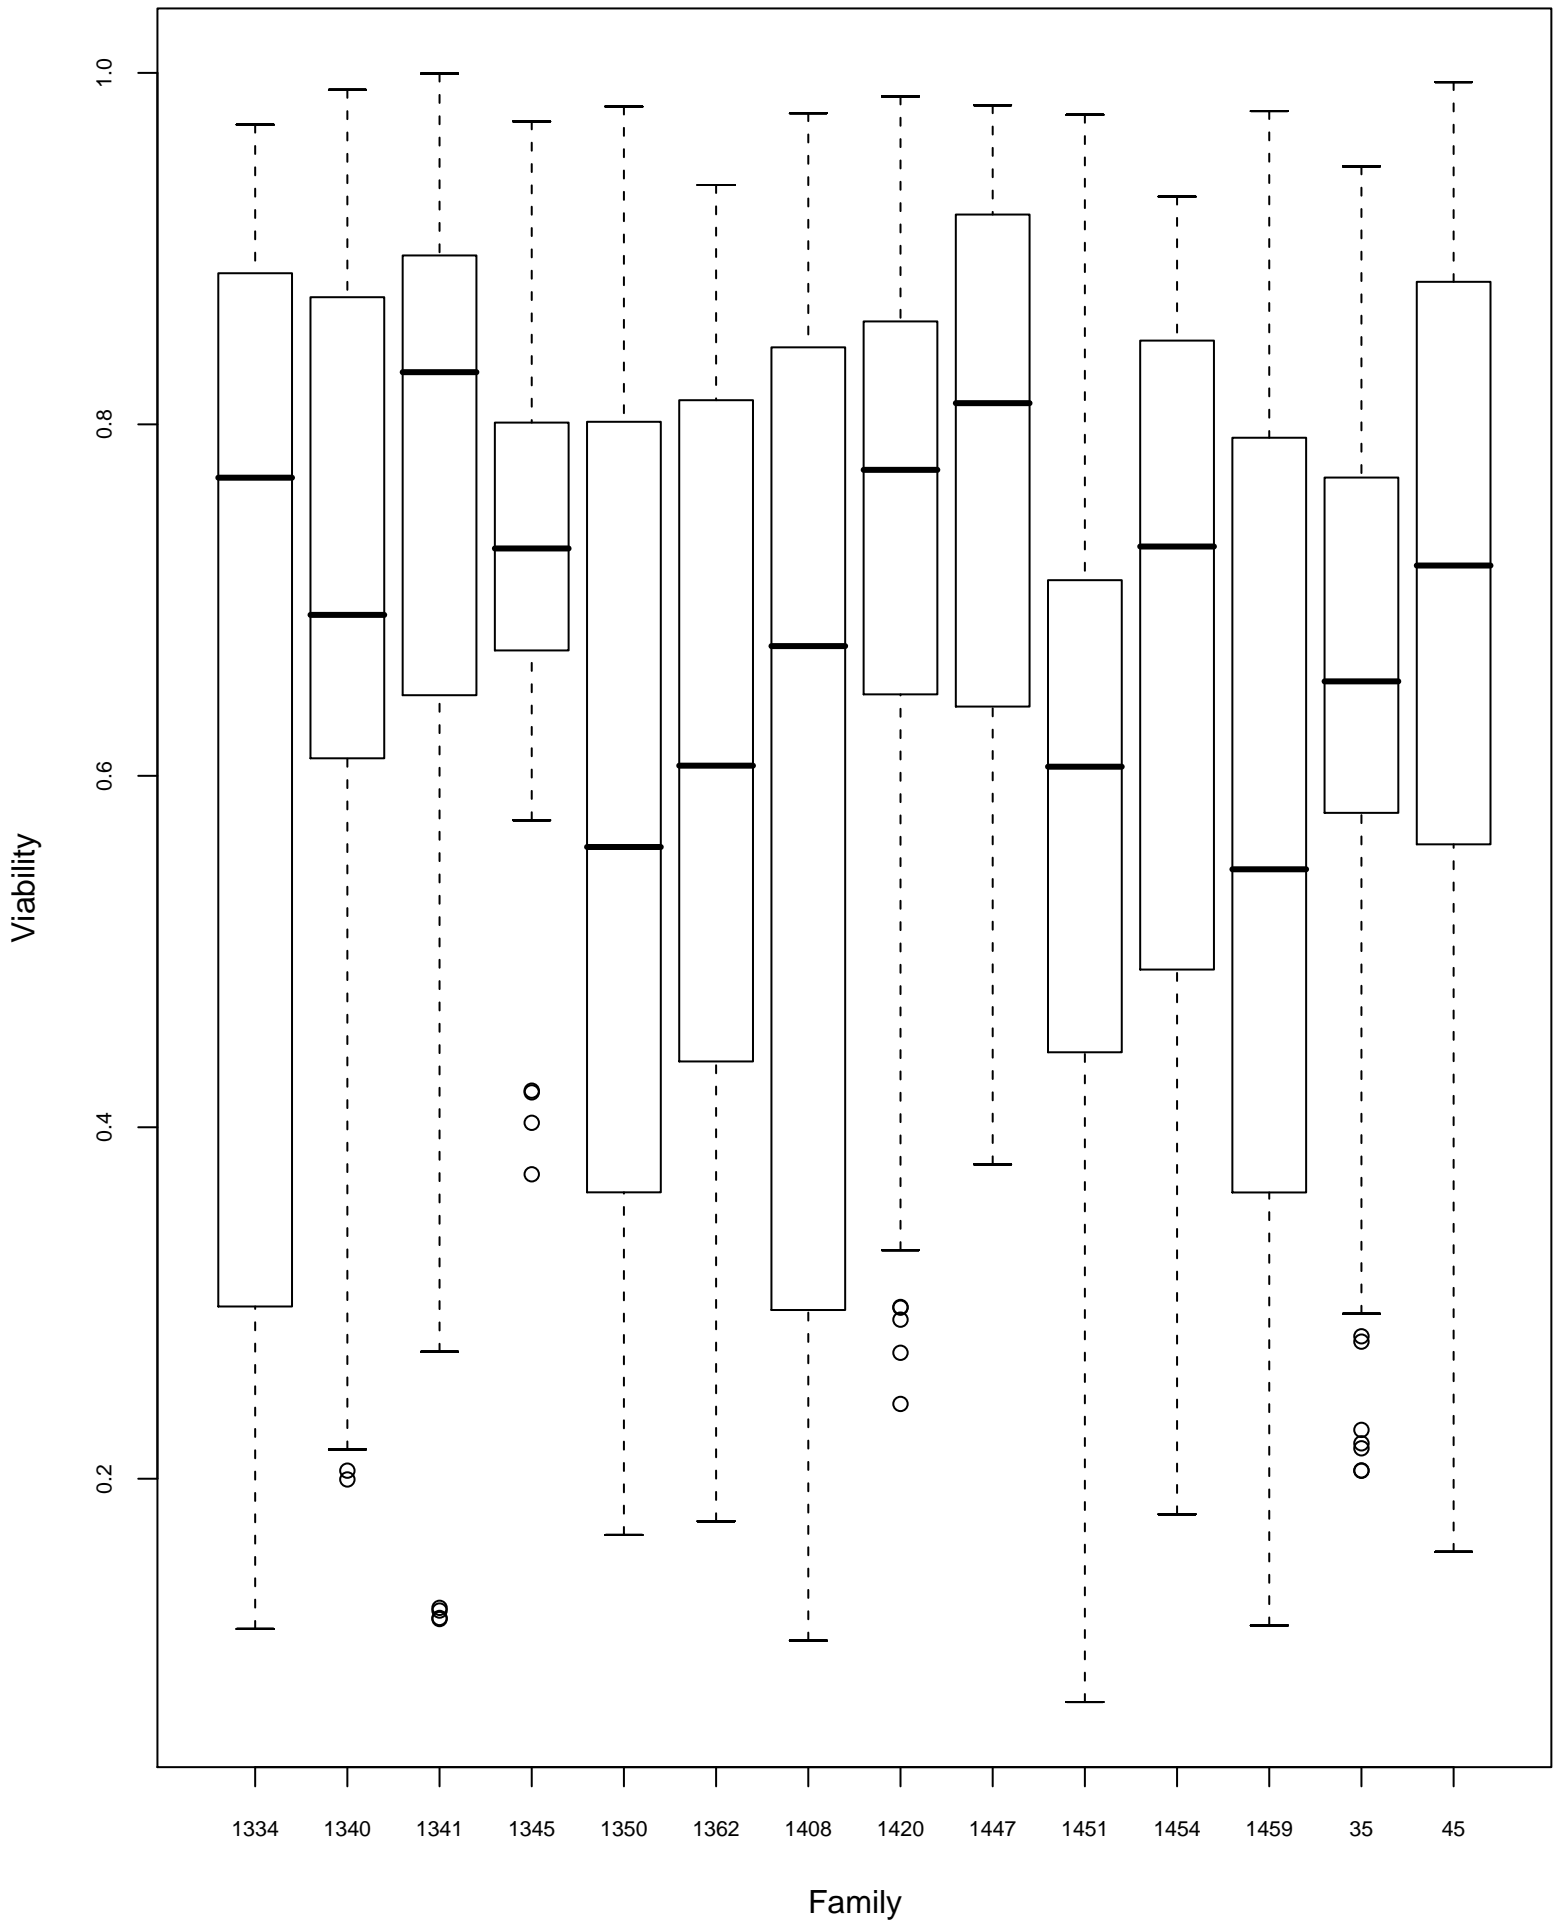

# Drug Vinb, dose 2e-05 (mM)

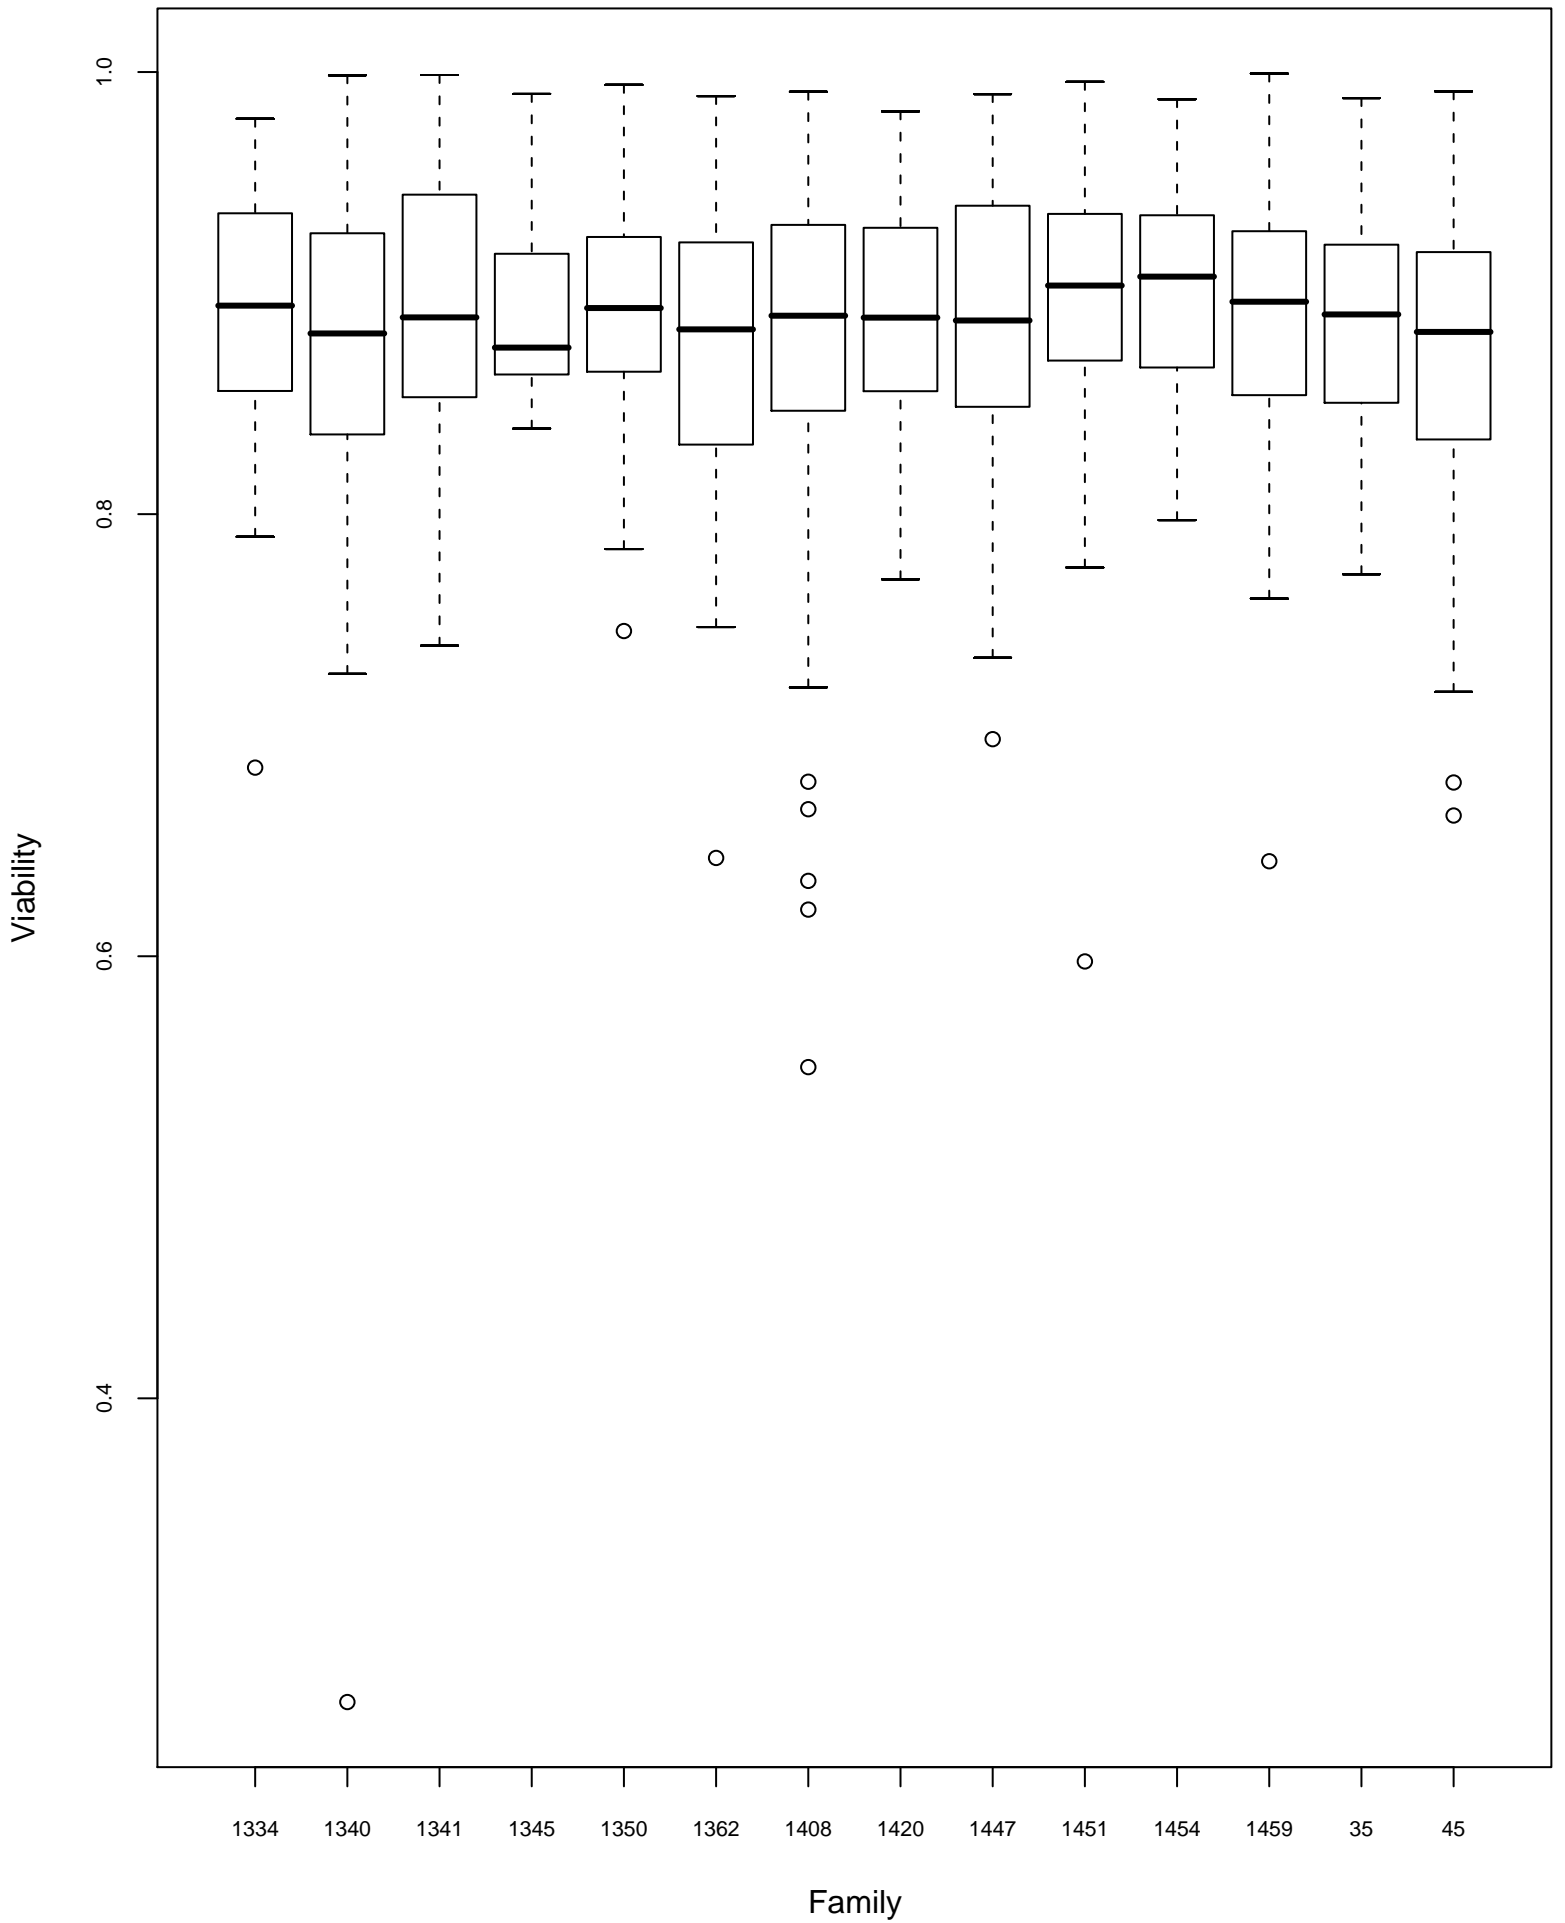

# Drug Vinb, dose 1e-05 (mM)

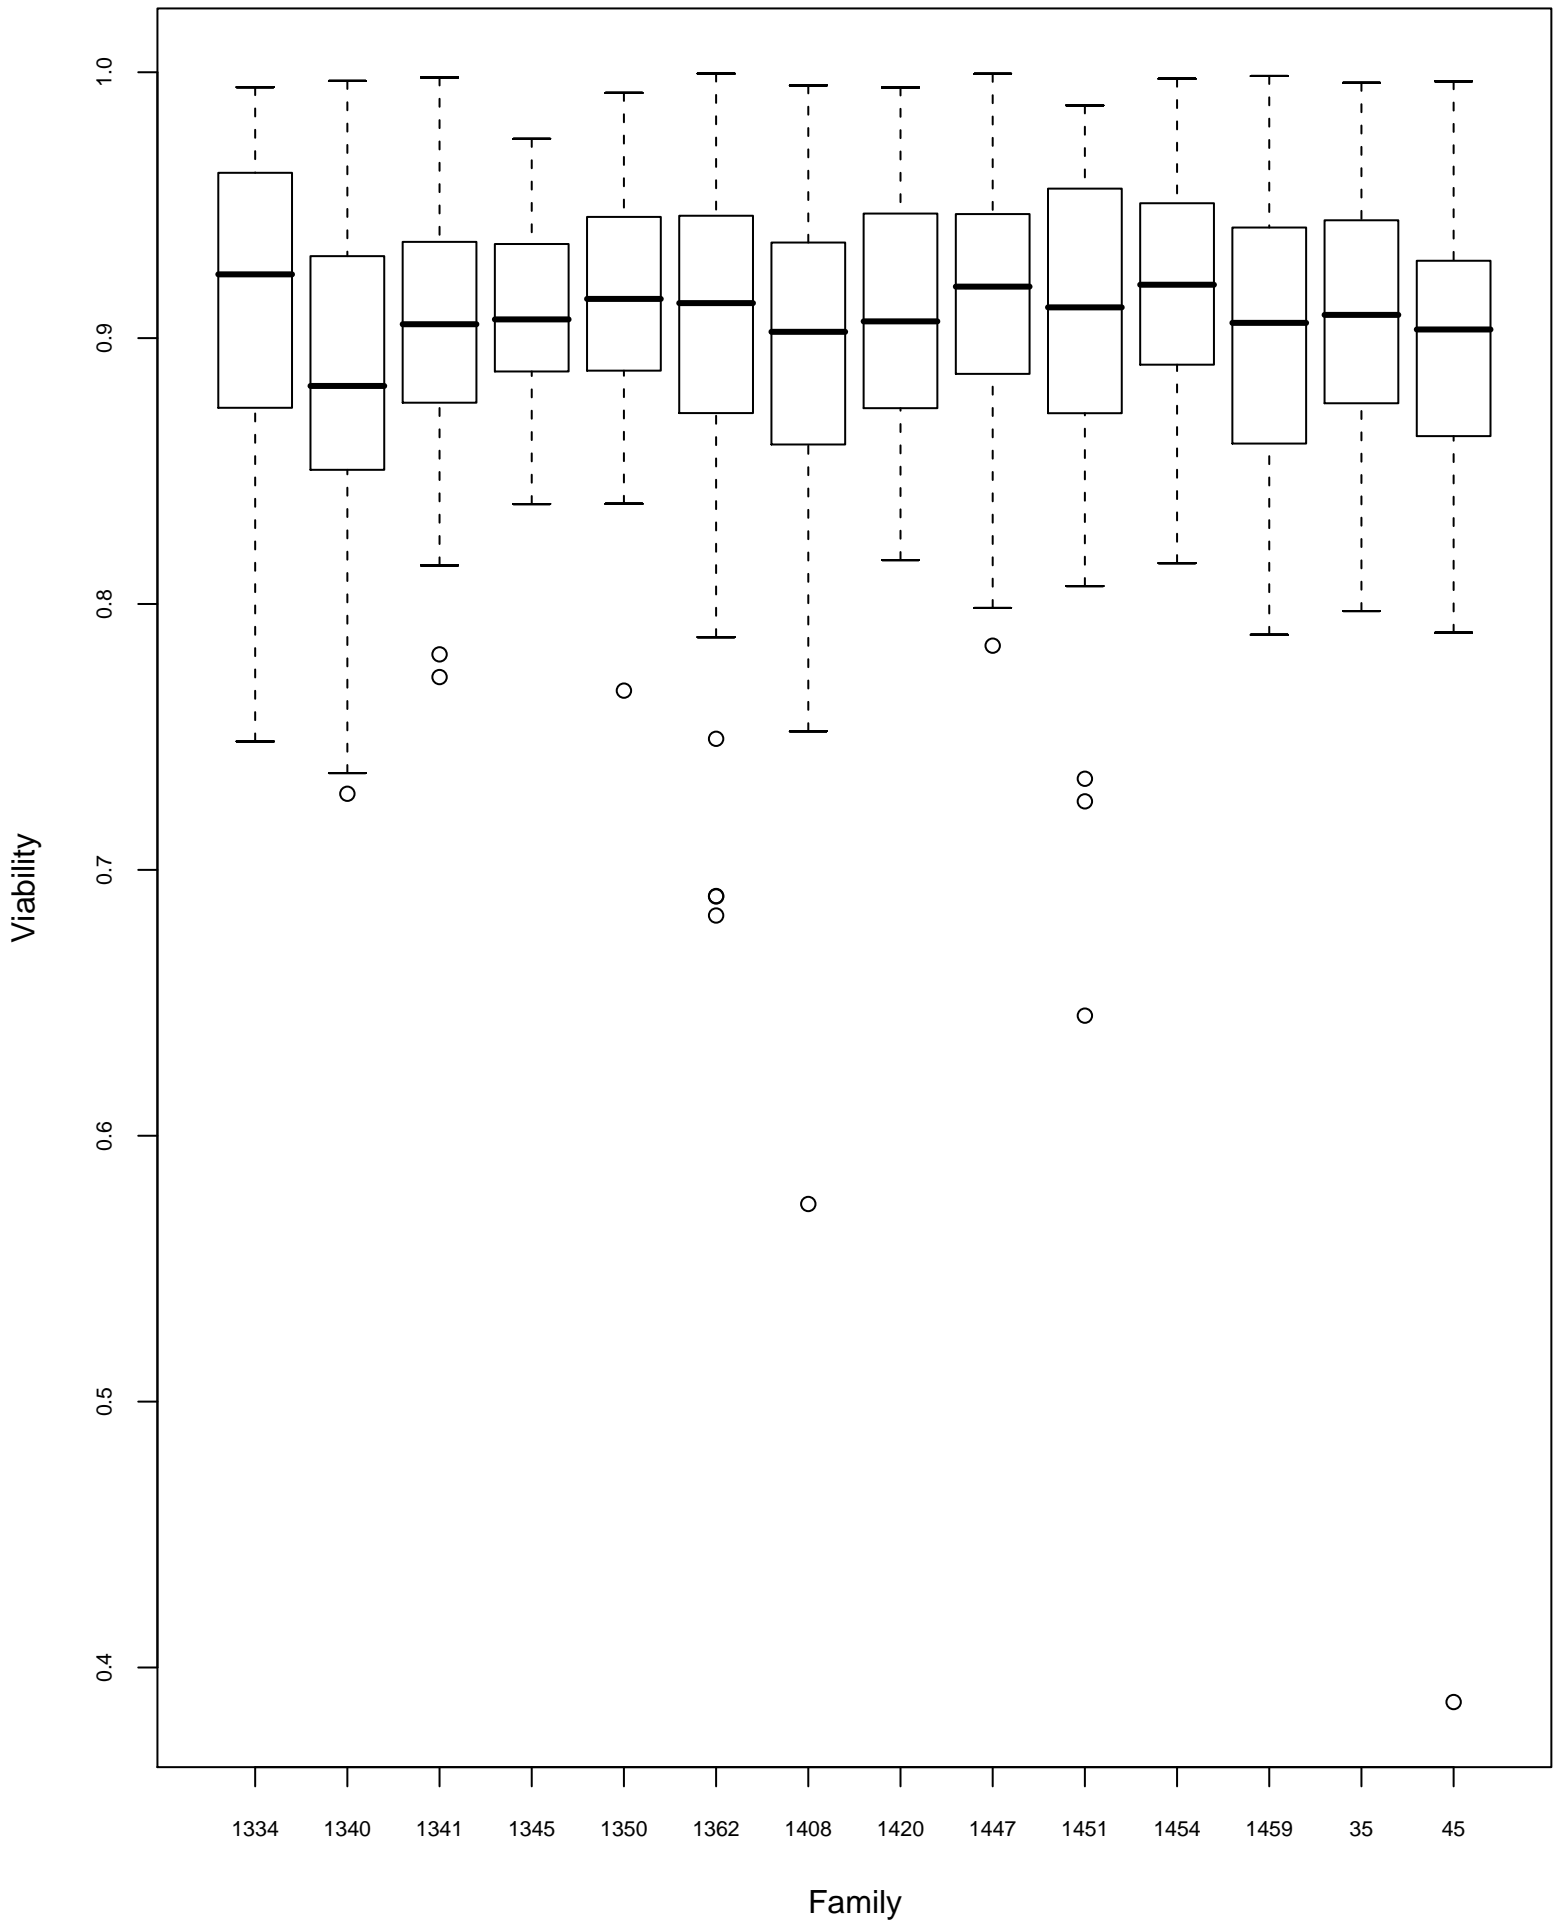

# Drug Vinb, dose 5e-06 (mM)

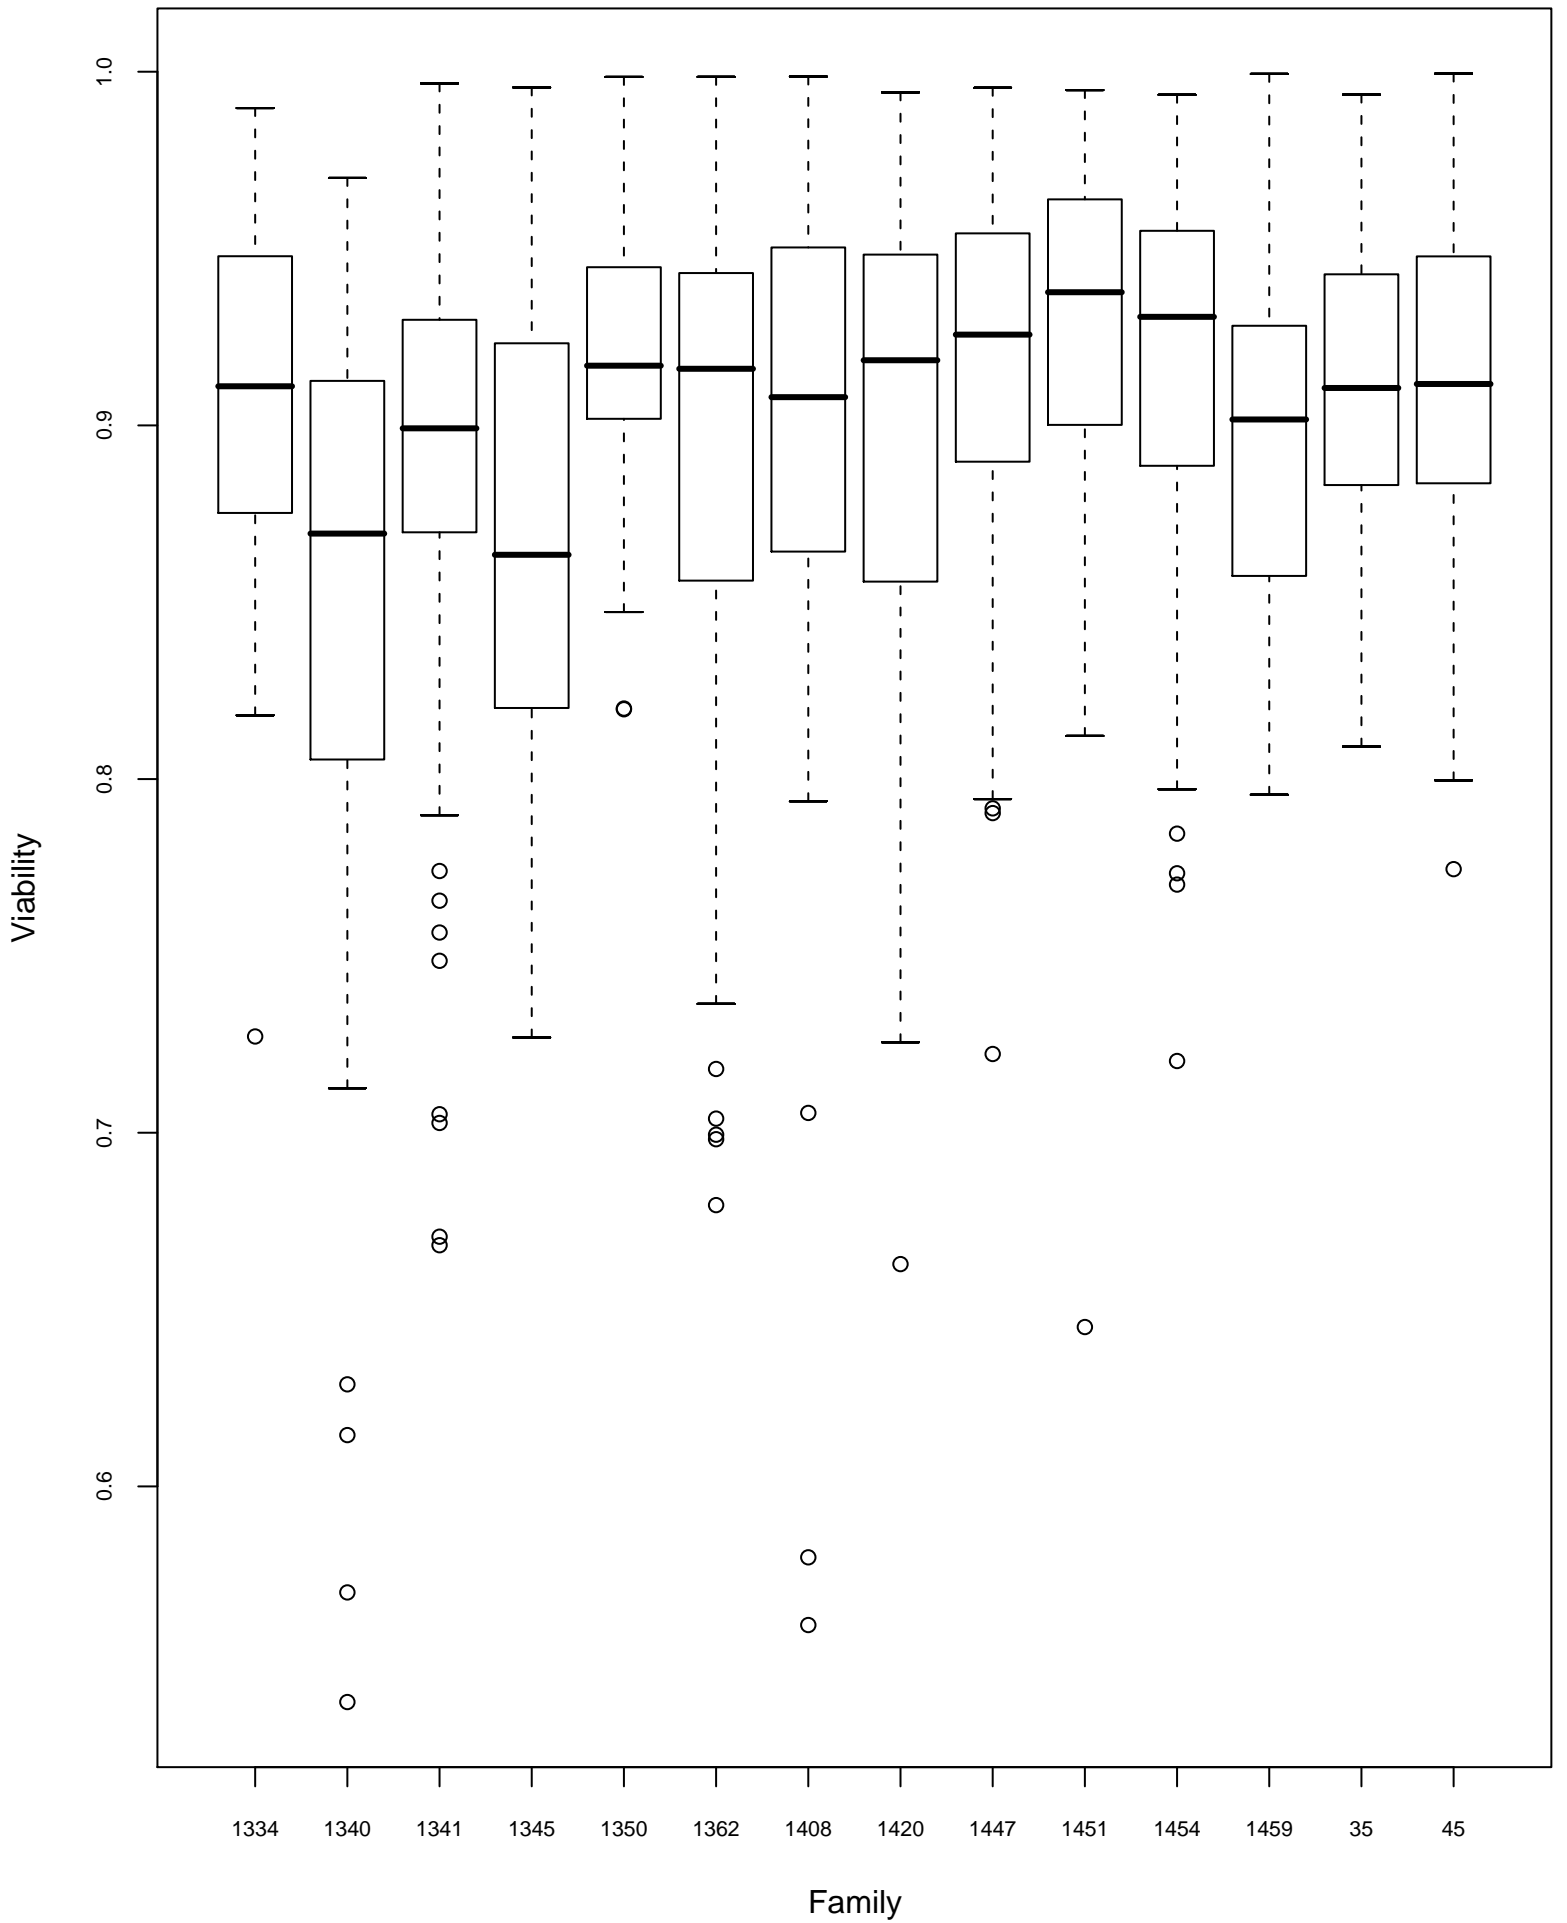

# Drug Vinc, dose 0.0001 (mM)

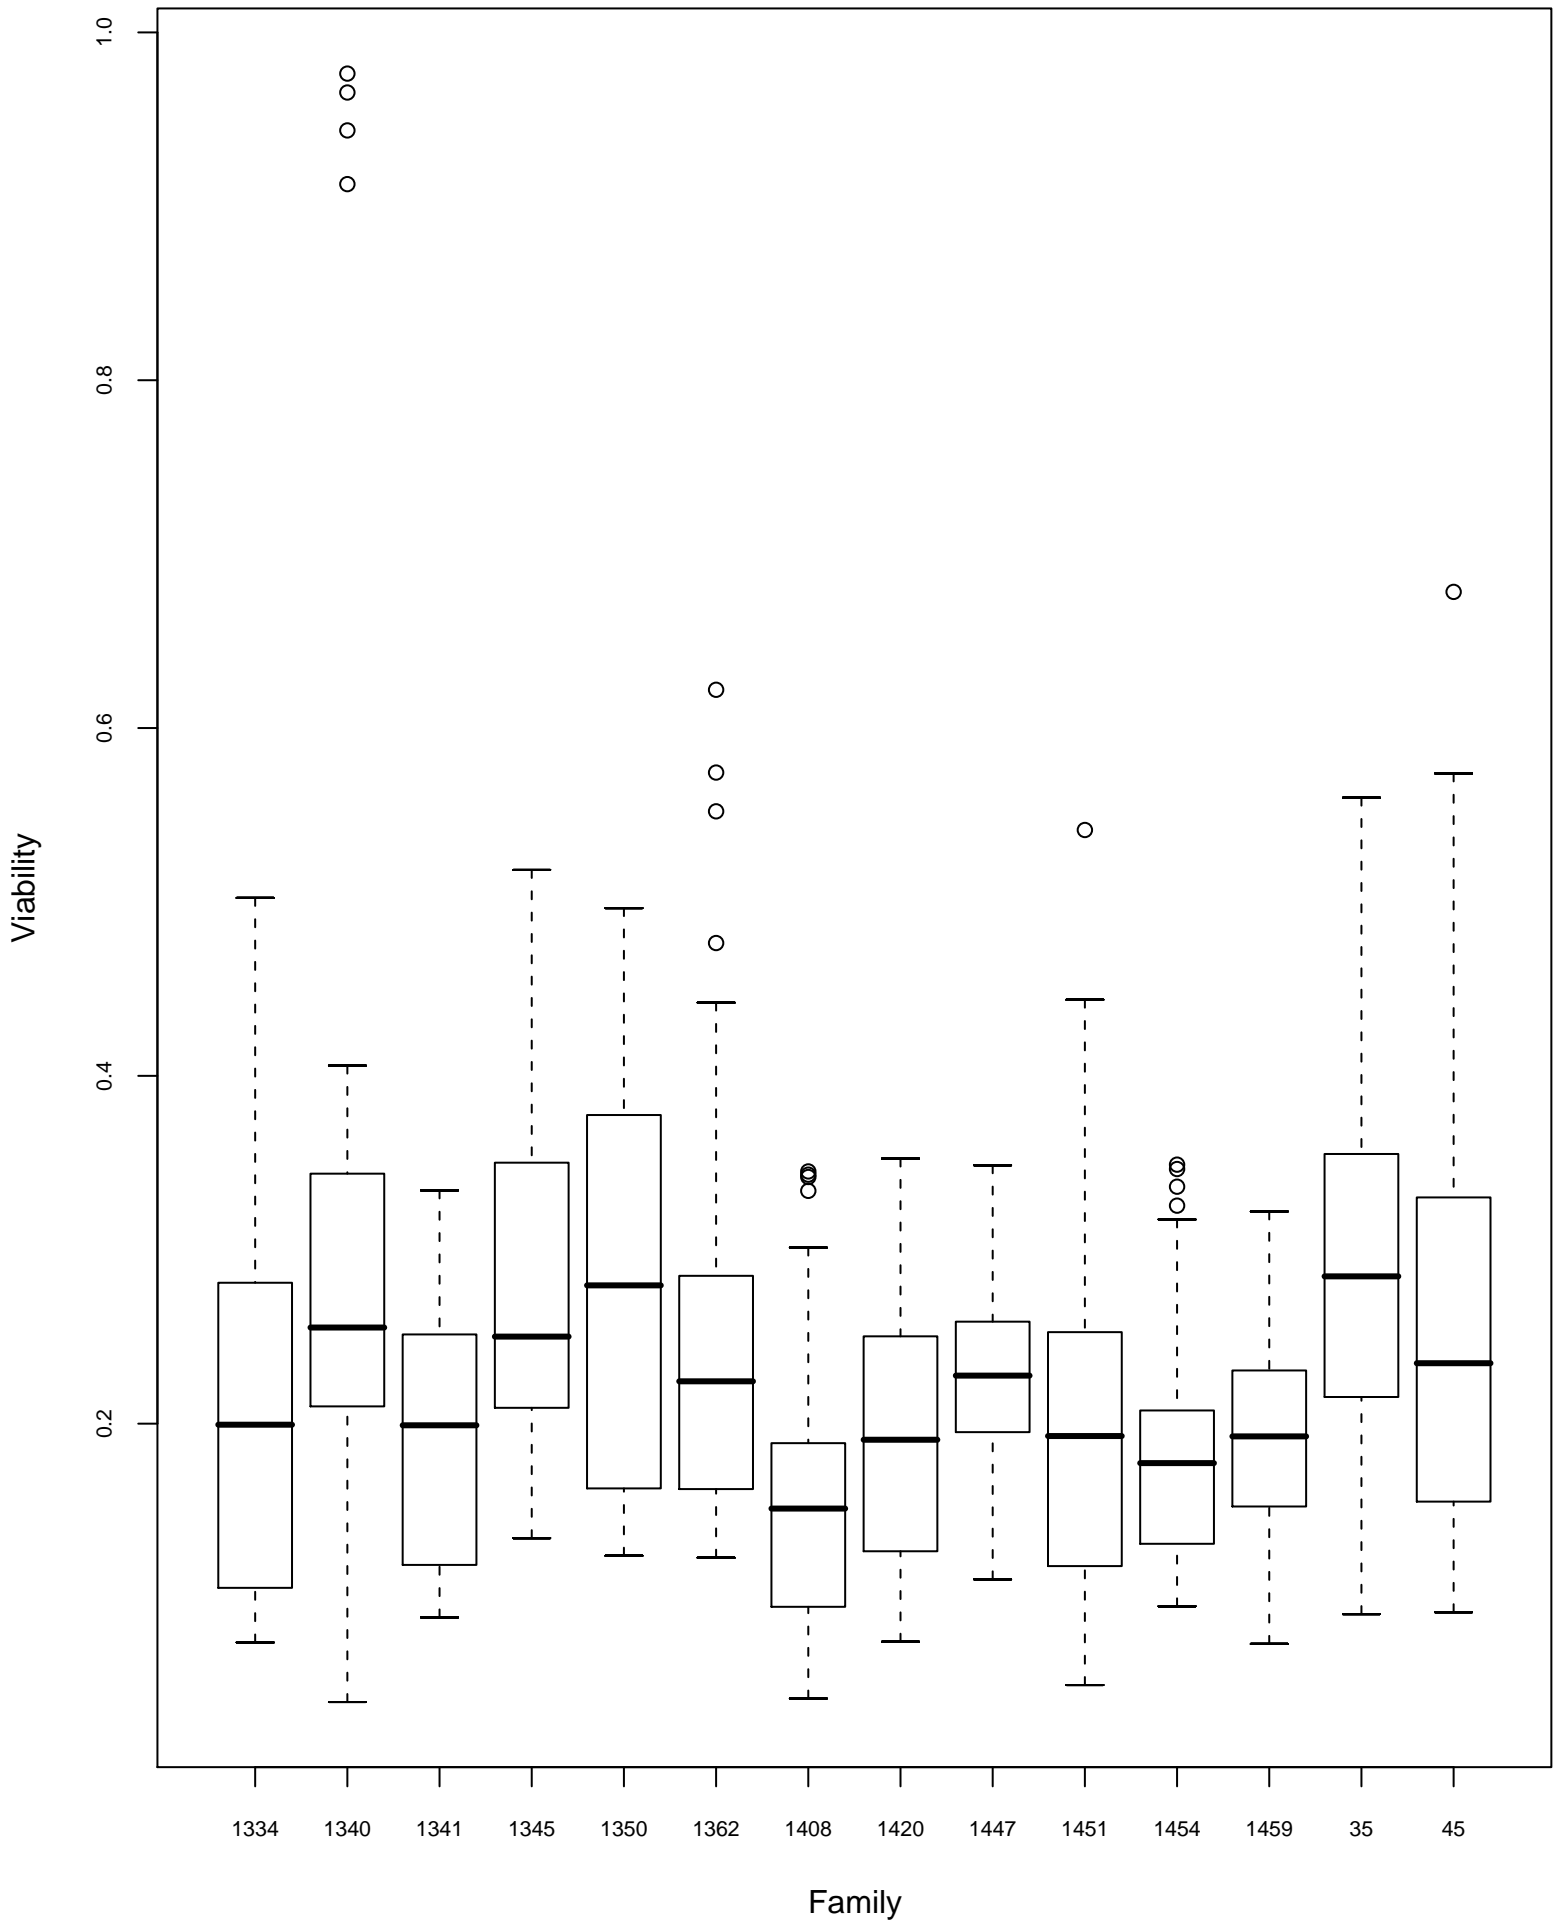

# Drug Vinc, dose 5e-05 (mM)

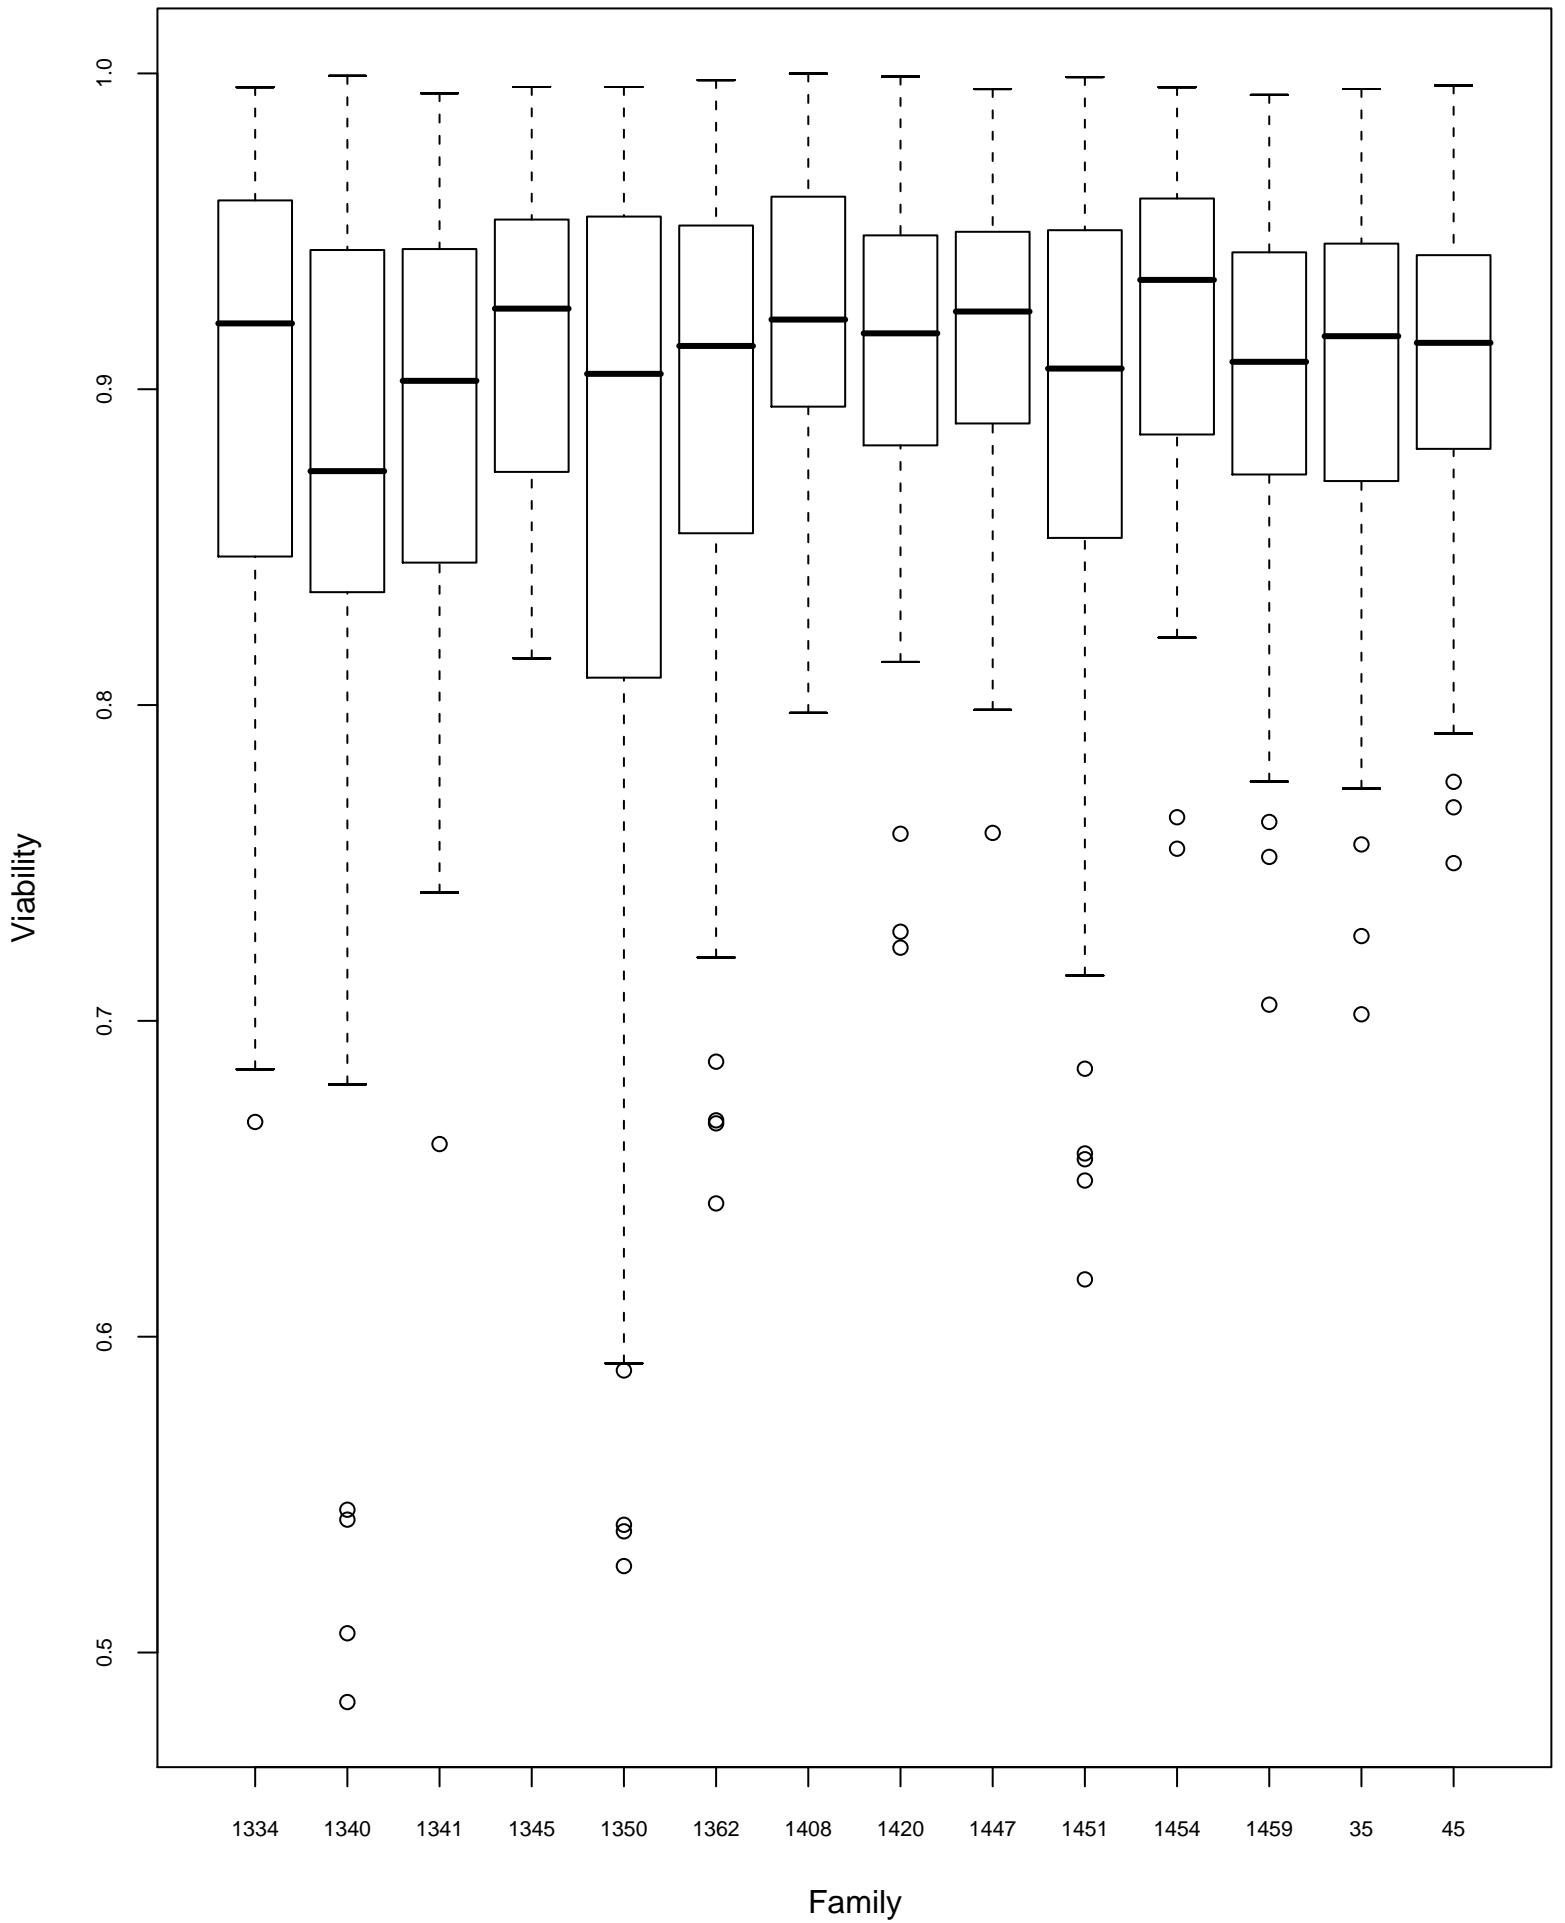

# Drug Vinc, dose 2.5e-05 (mM)

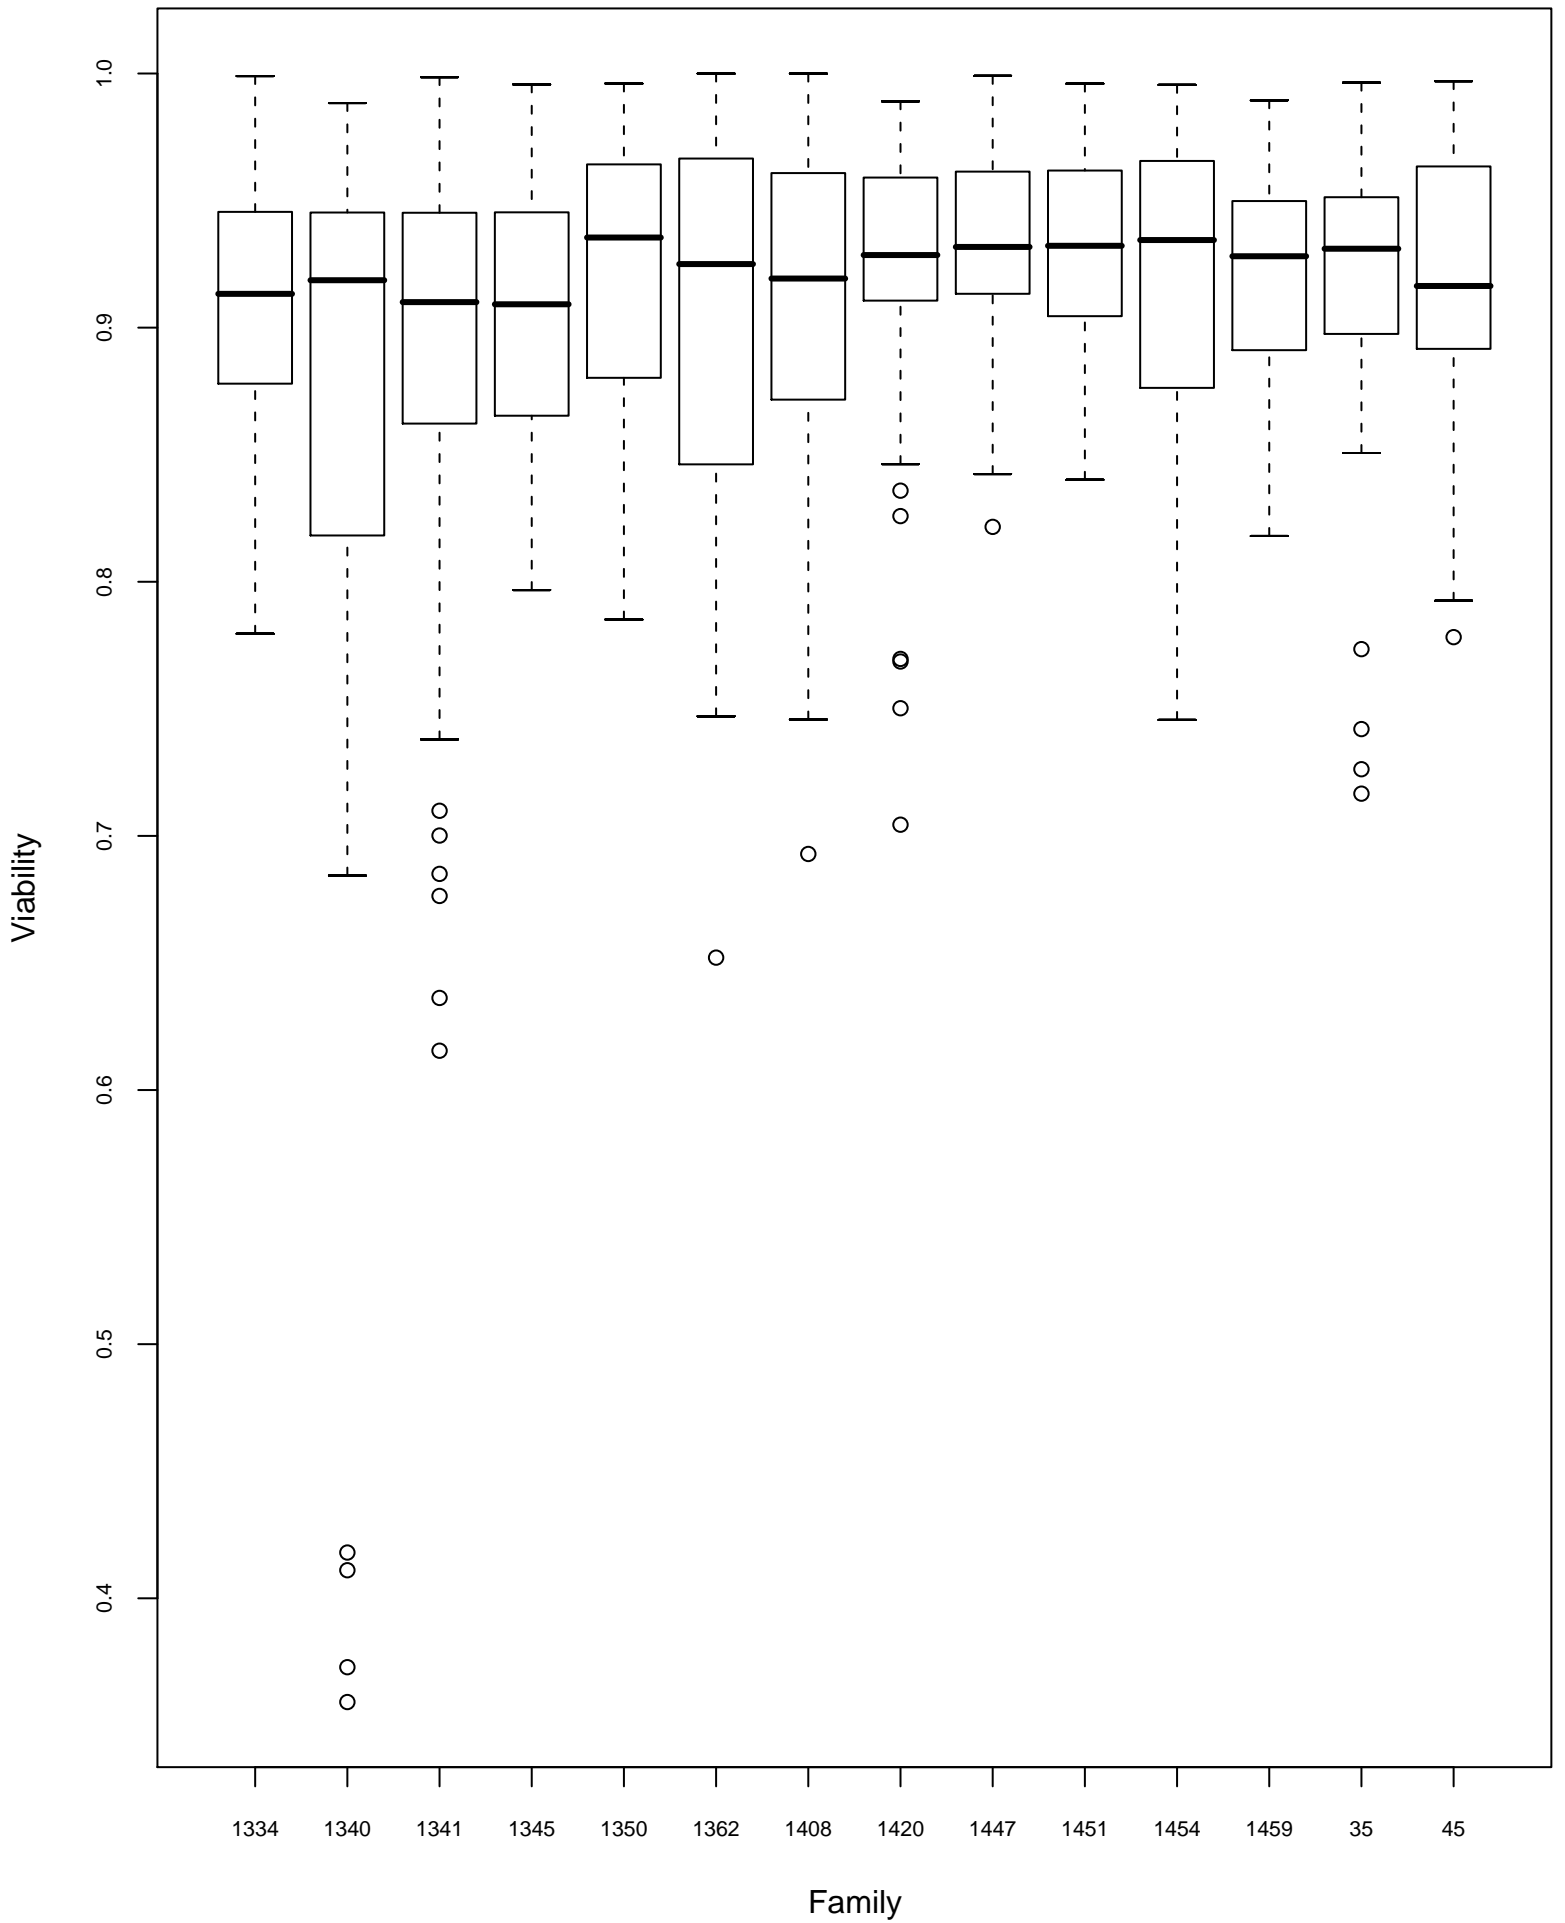

# Drug Vinc, dose 1.25e-05 (mM)

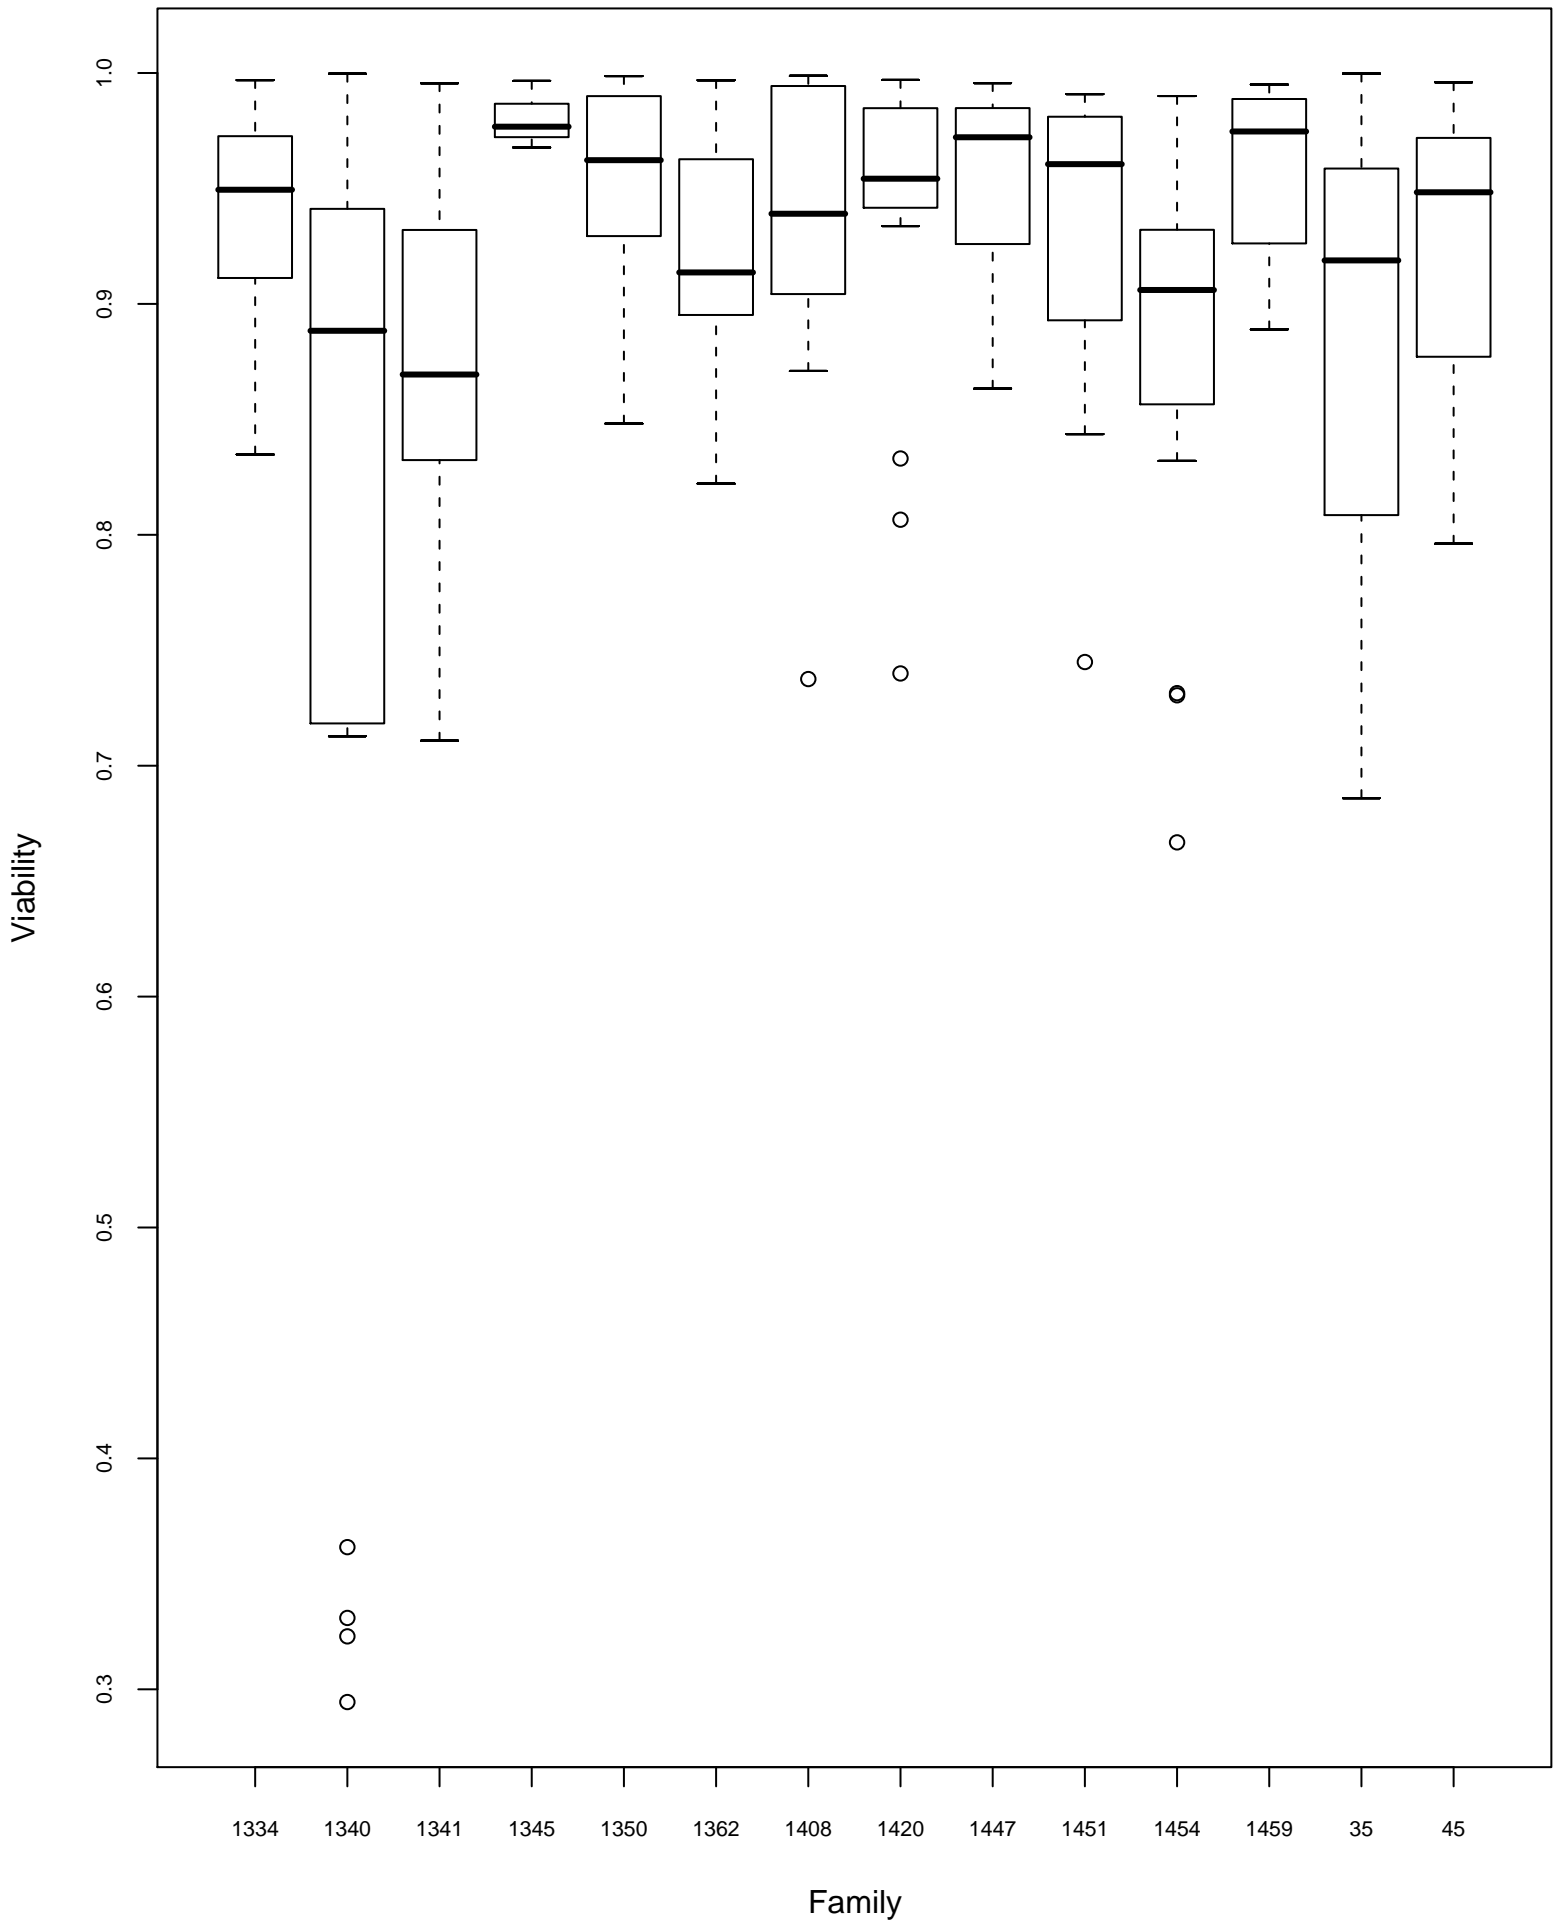



# Drug Vino, dose 0.0002 (mM)

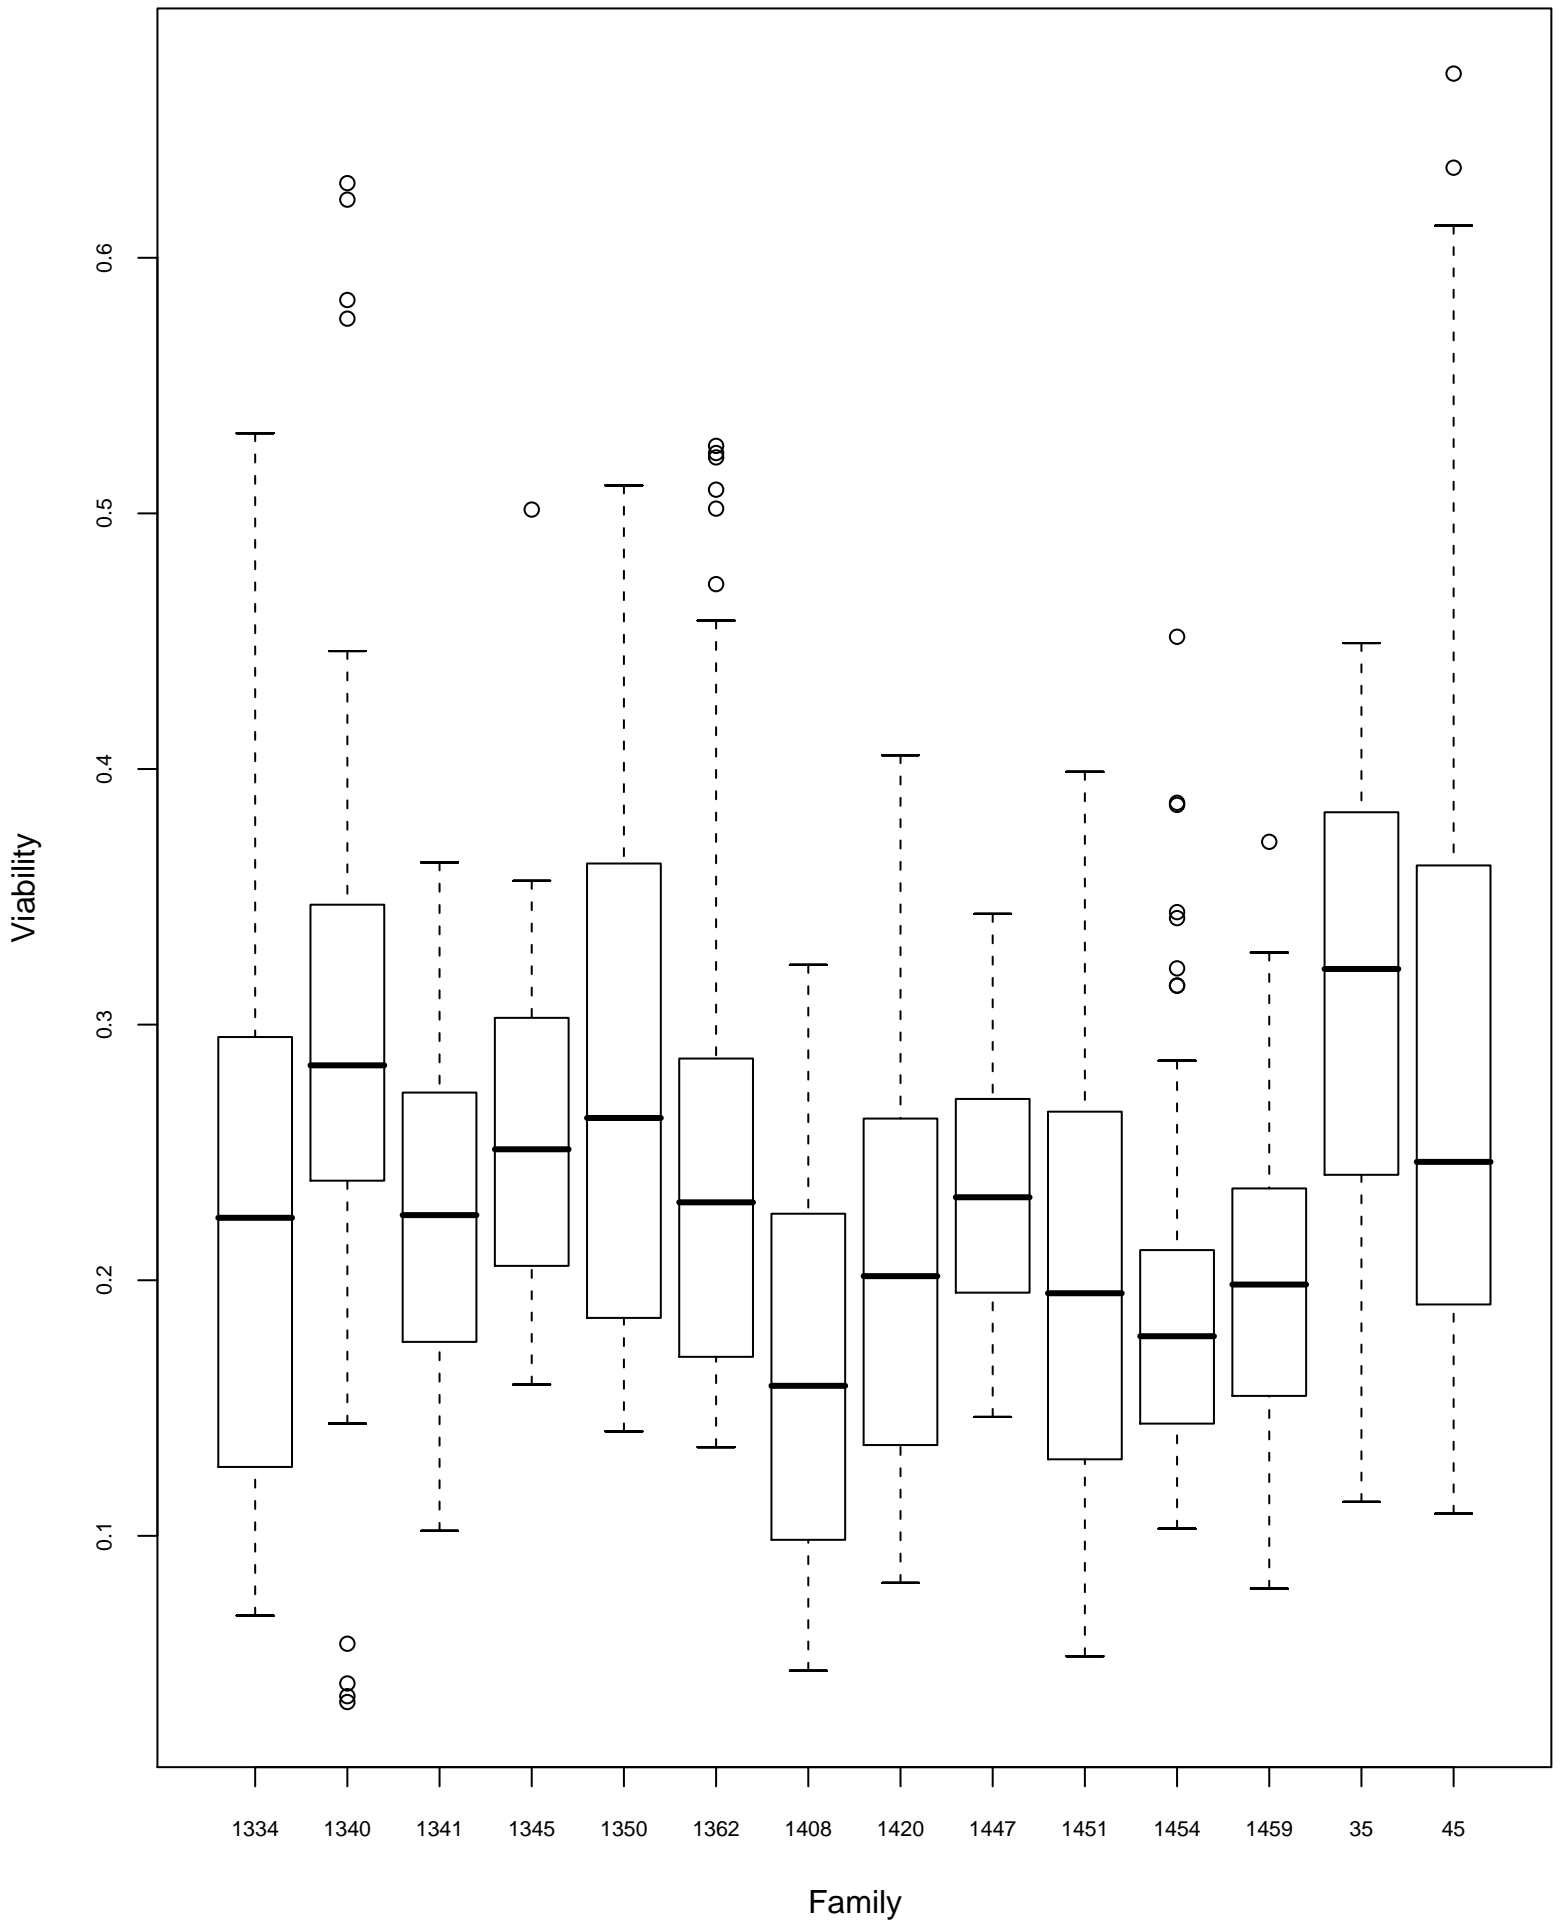

# Drug Viro, dose 0.0001333 (mM)

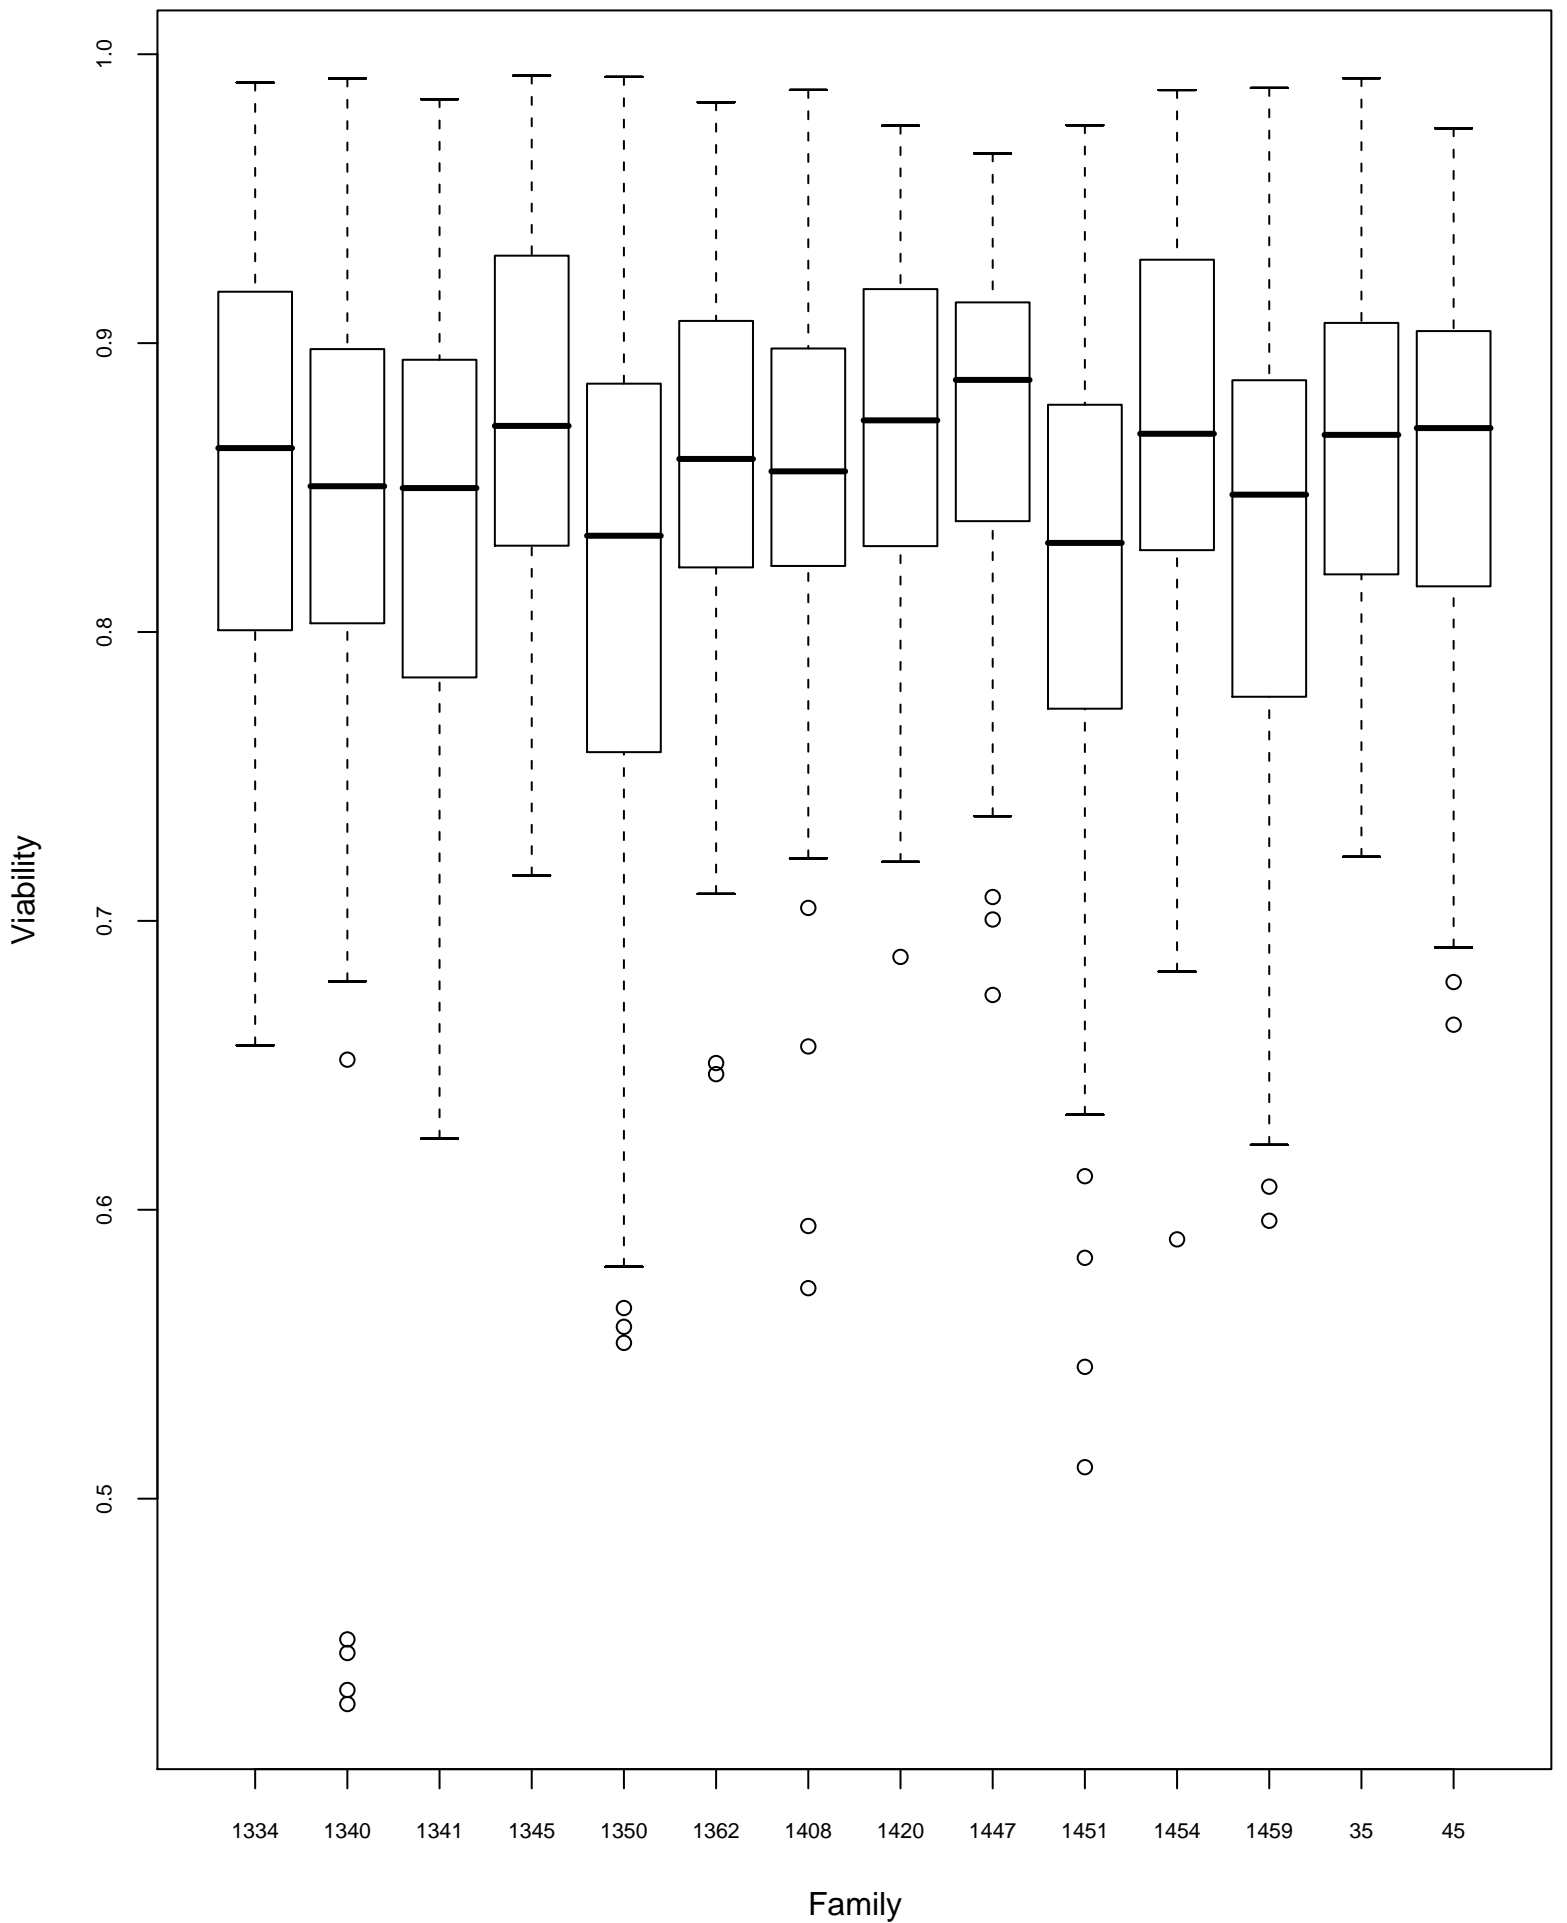

# Drug VINO, dose 8.89e-05 (mM)

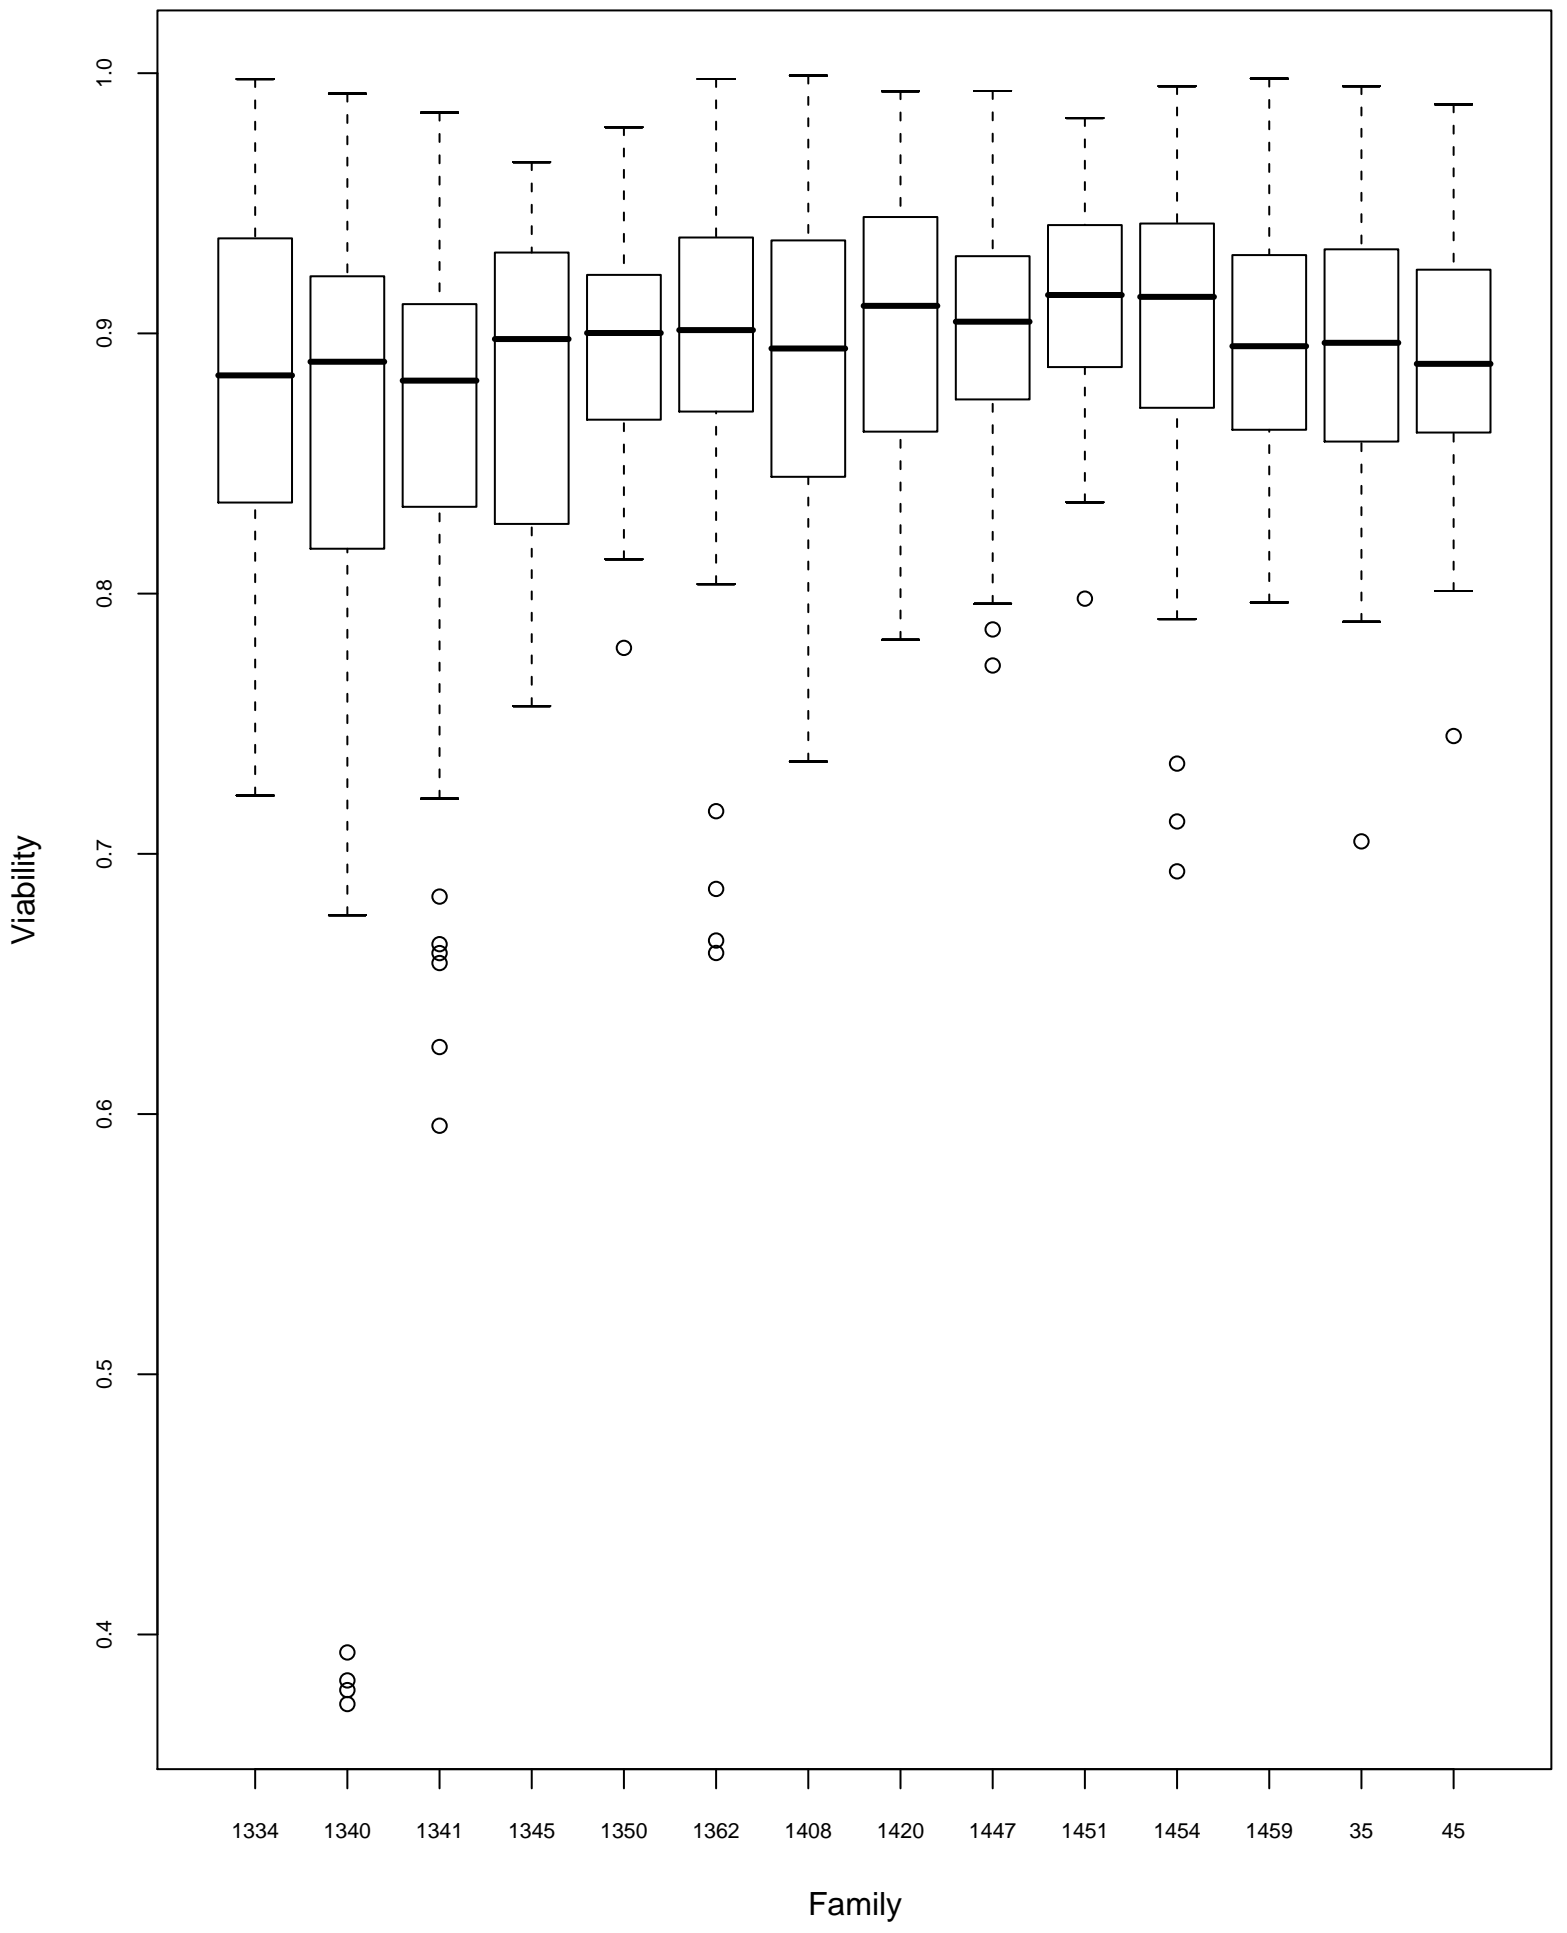

# Drug Vino, dose 5.93e-05 (mM)

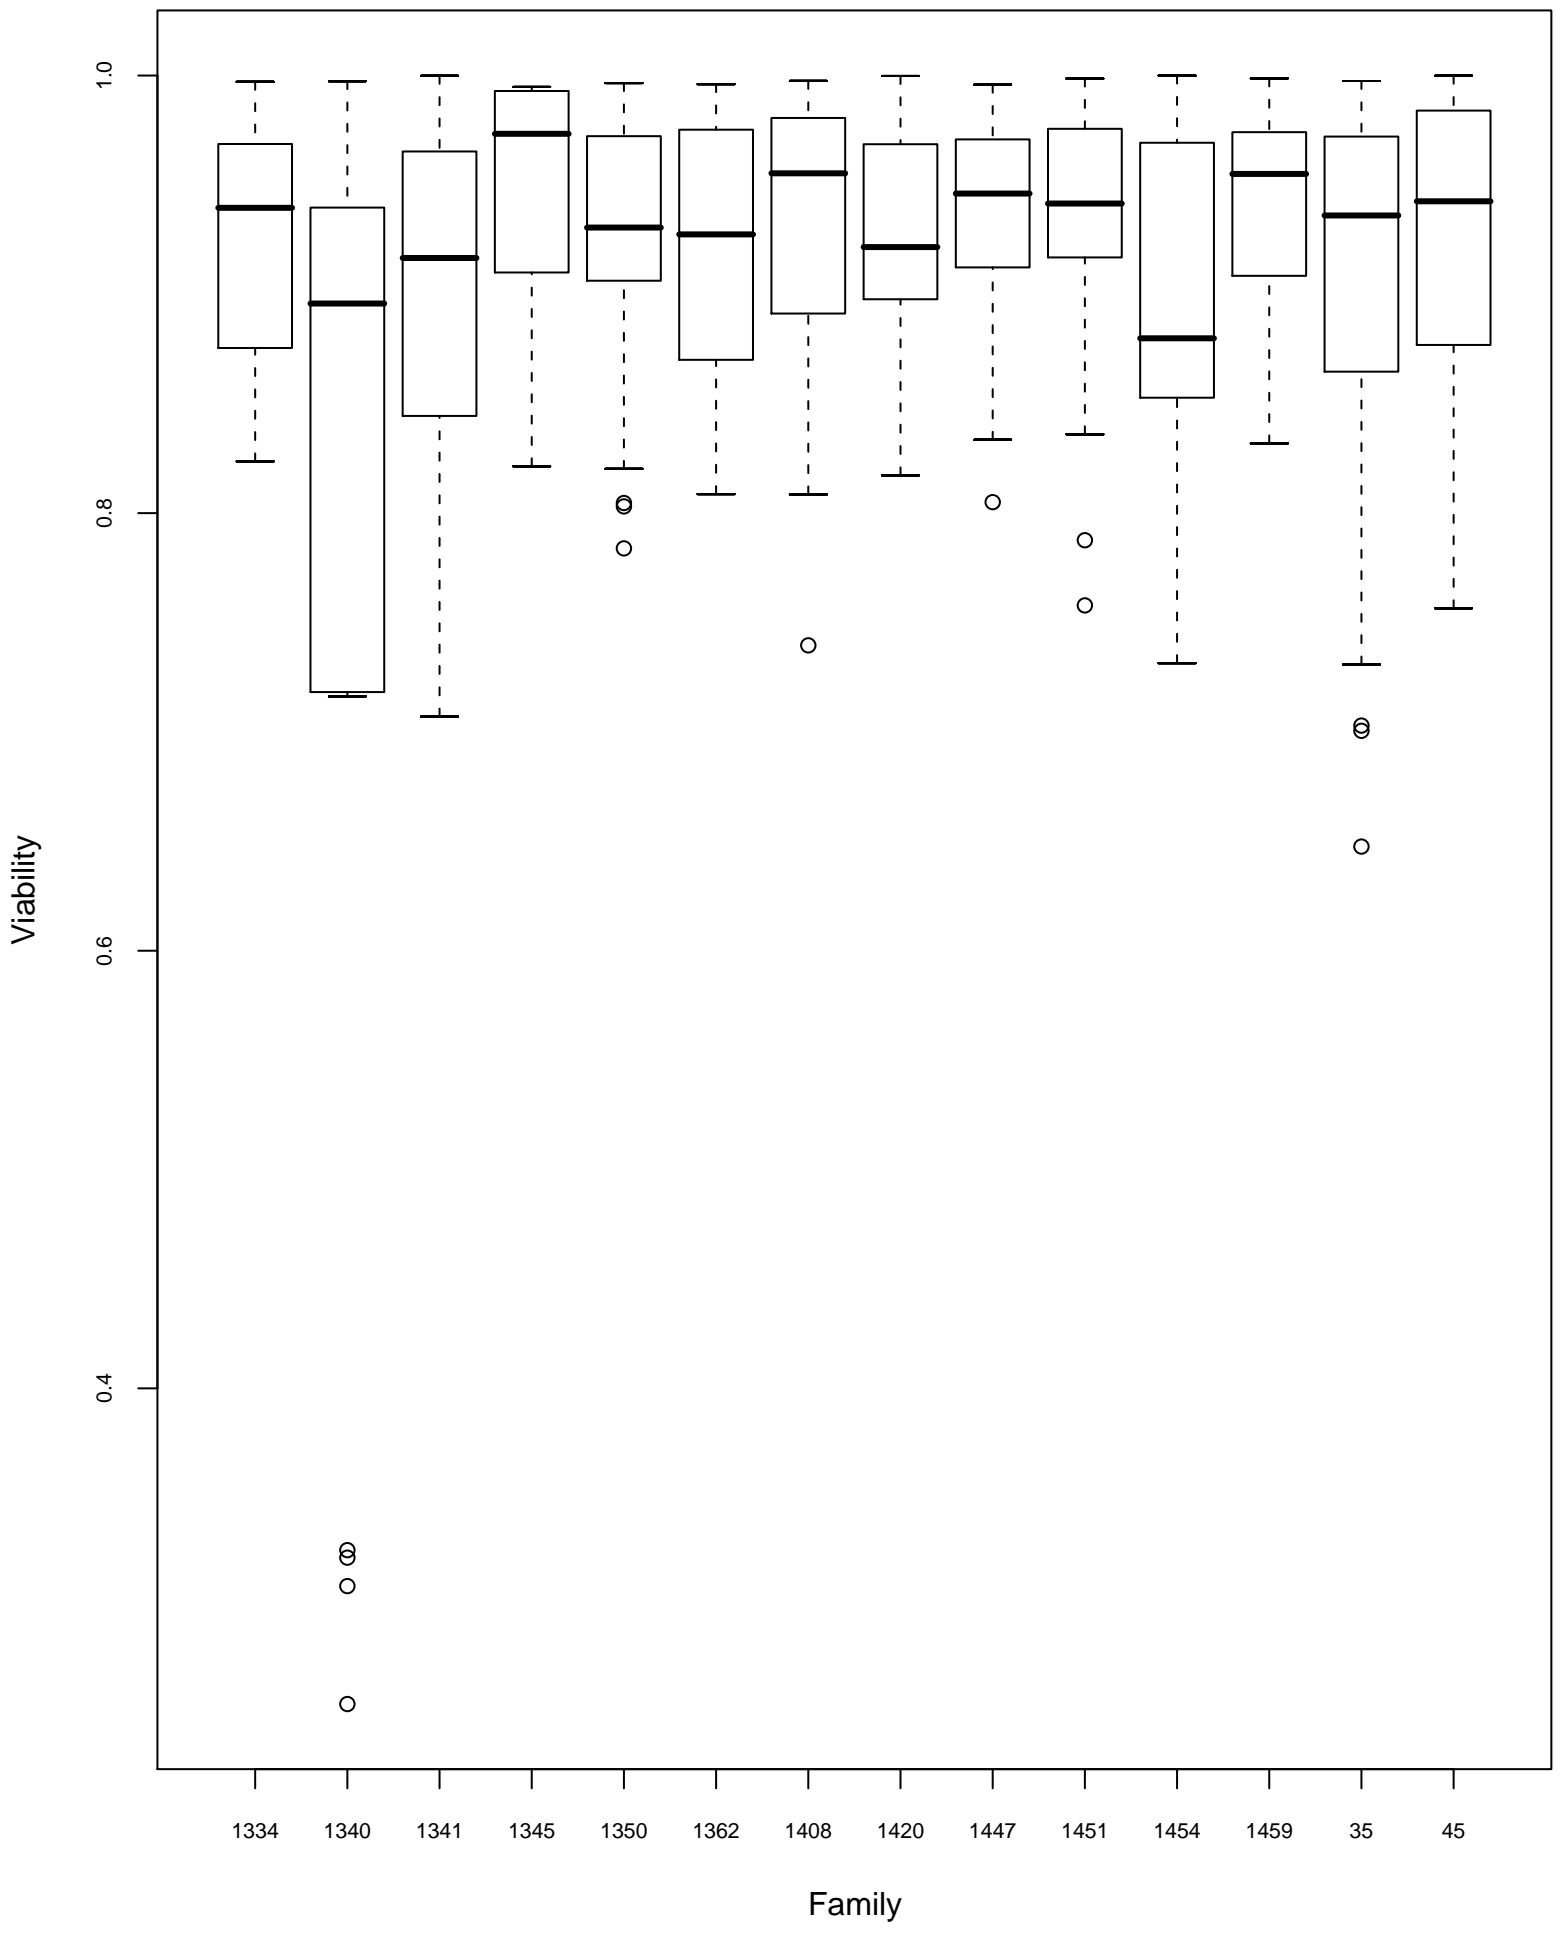

Supplement: NIHMS336613-supplement-figure_1.pdf [file NIHMS336613-supplement-figure_1.pdf]
