# Supplementary material
Source: PubMed Central journal article supplement (PMC3399590)

# Drug 5FU

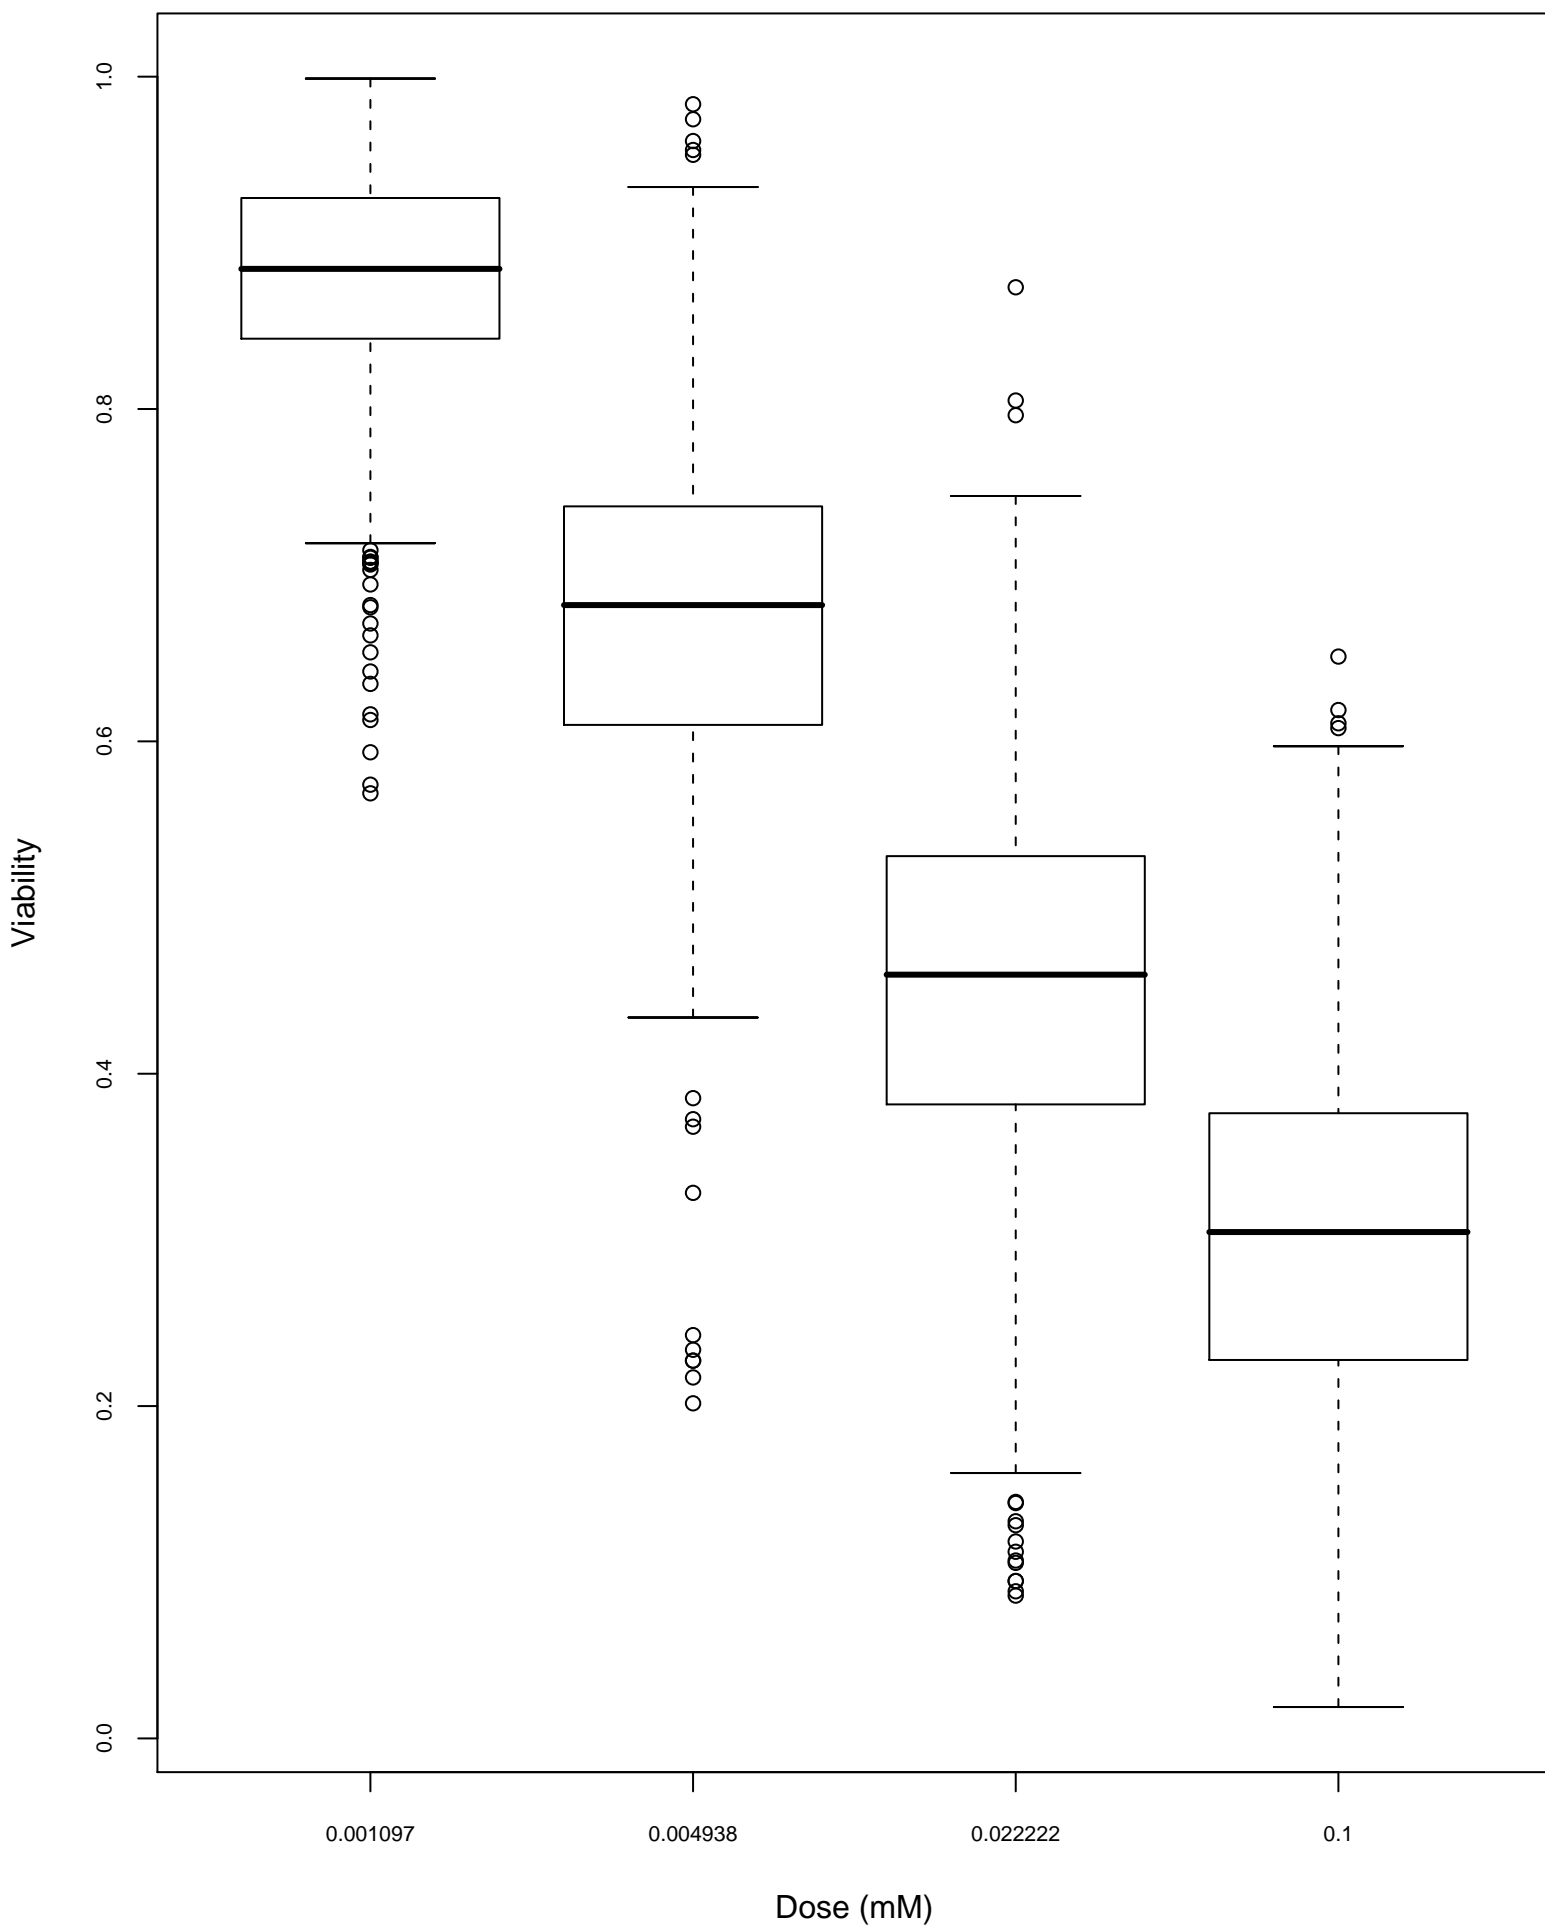

# Drug Arsen

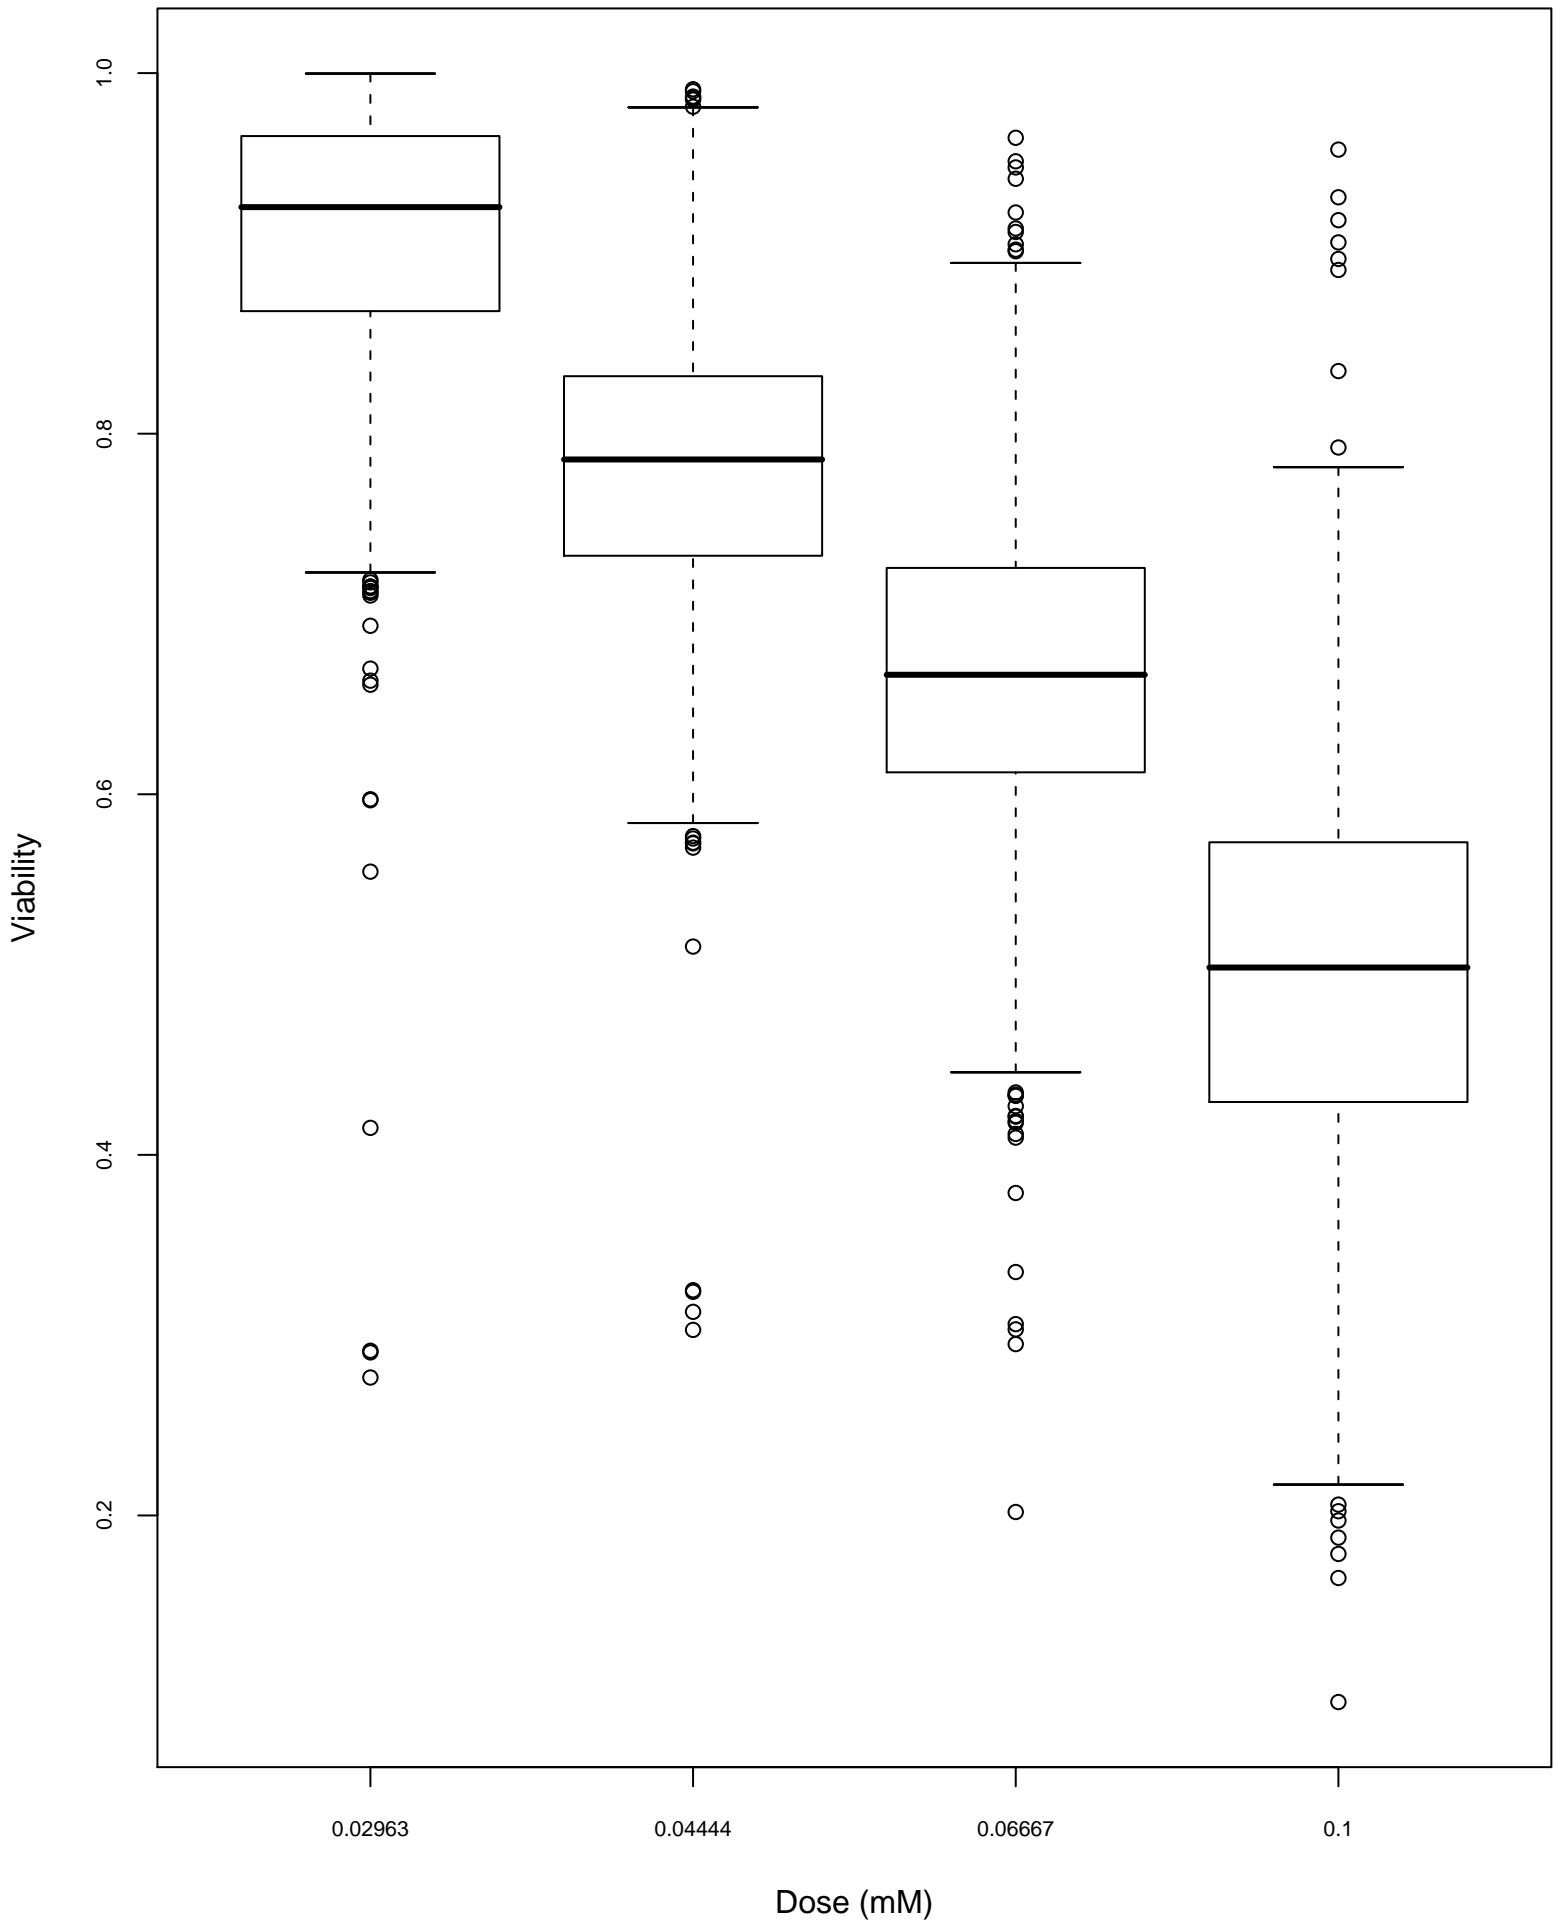

# Drug Aza

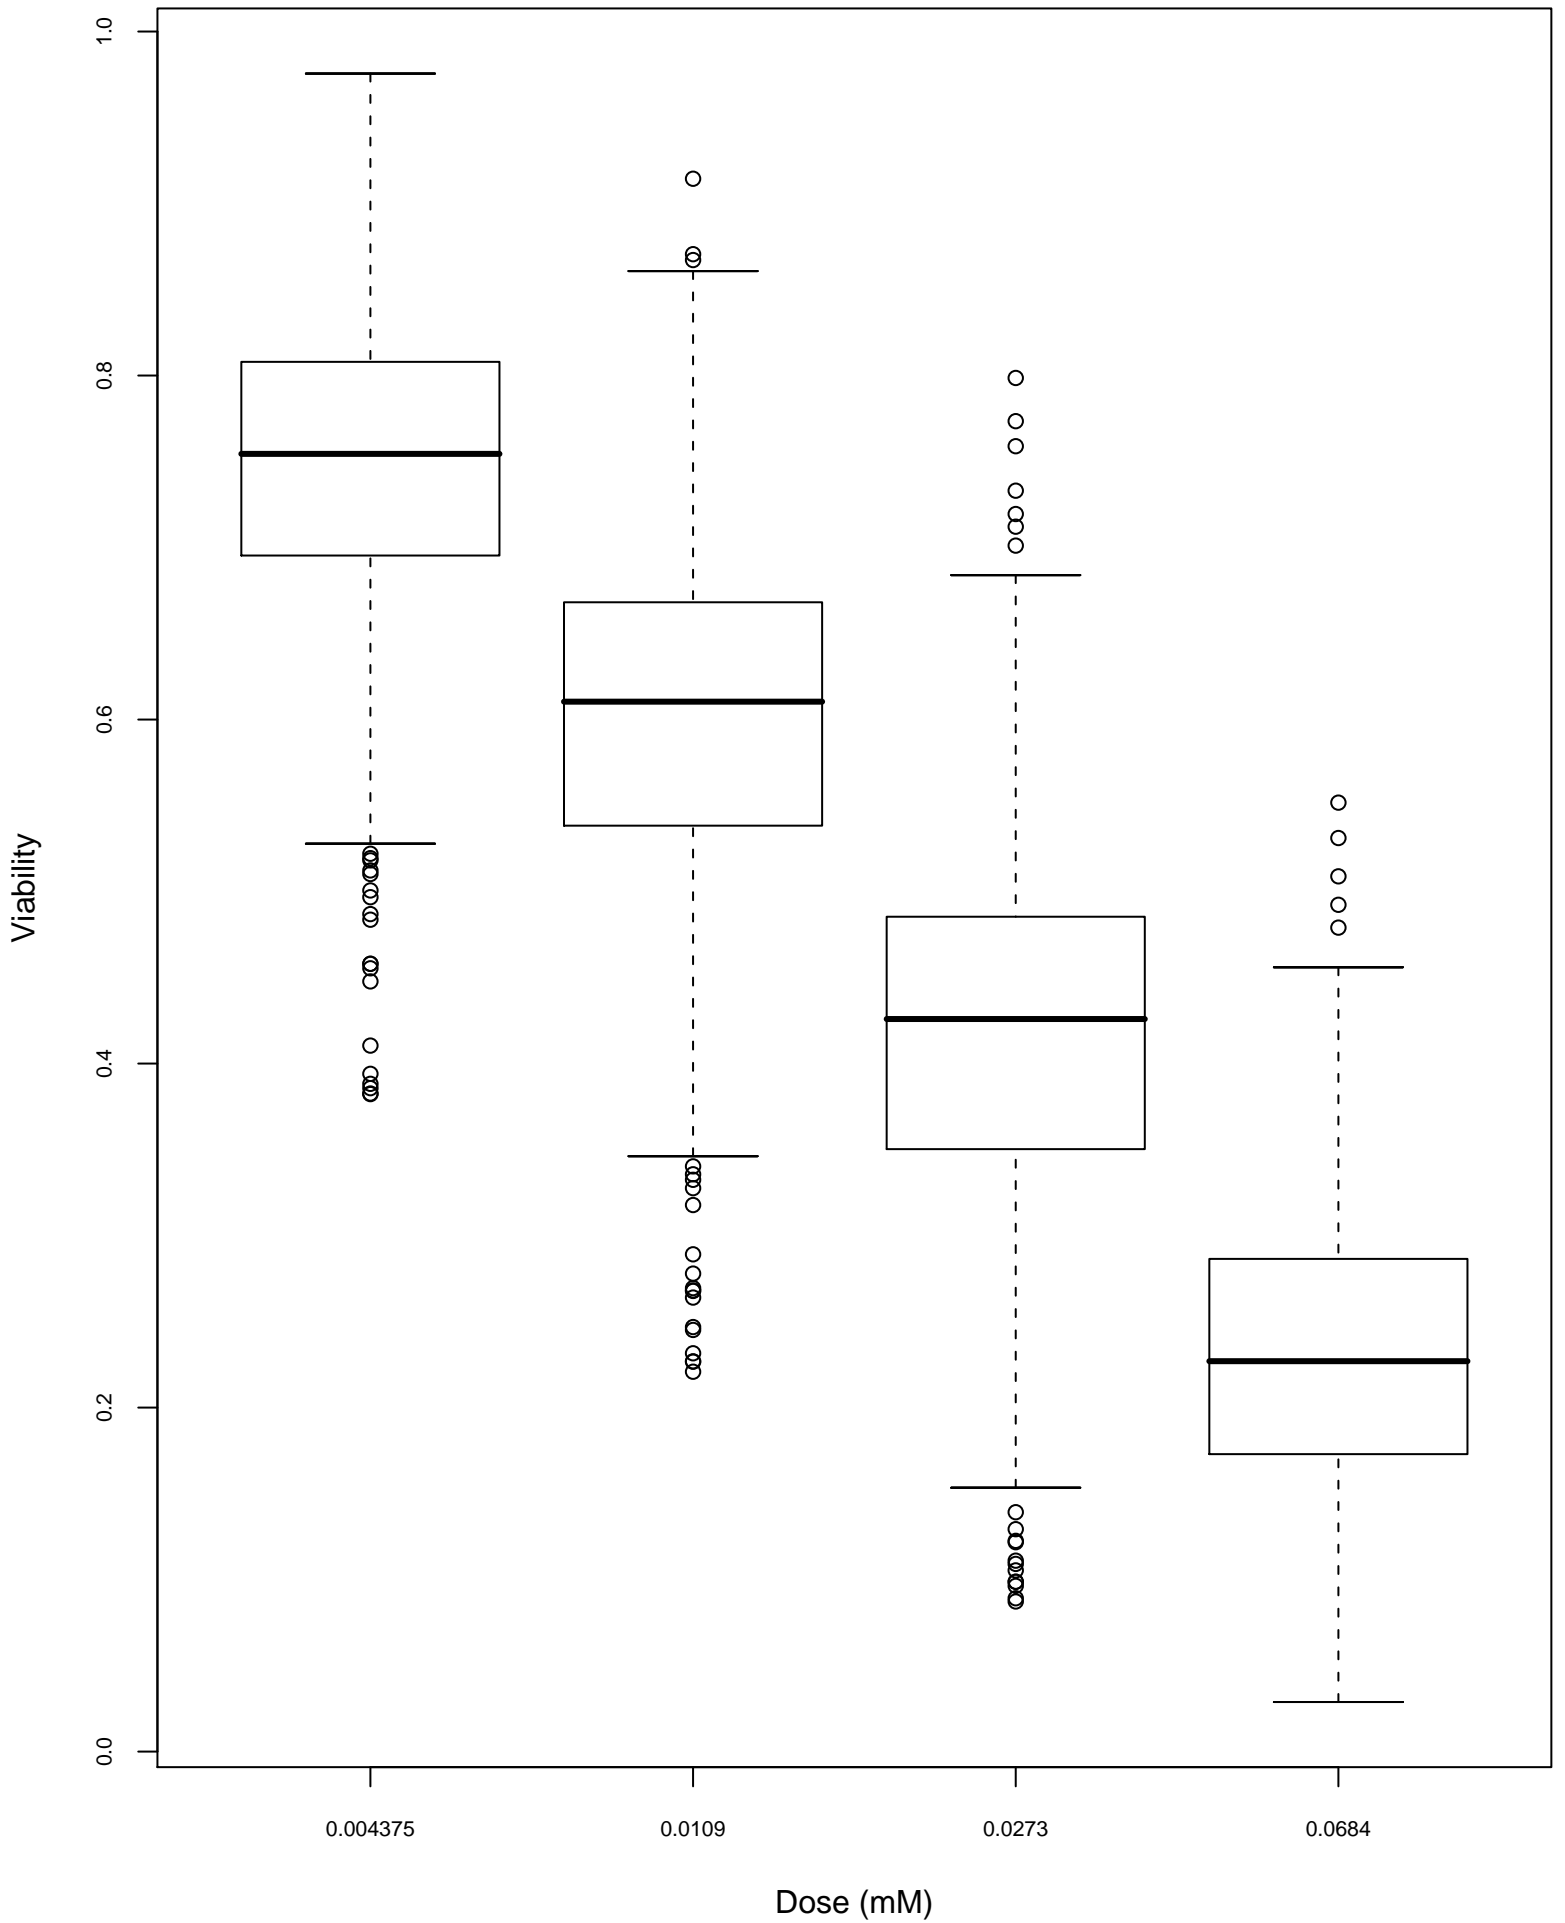

# Drug Bleo

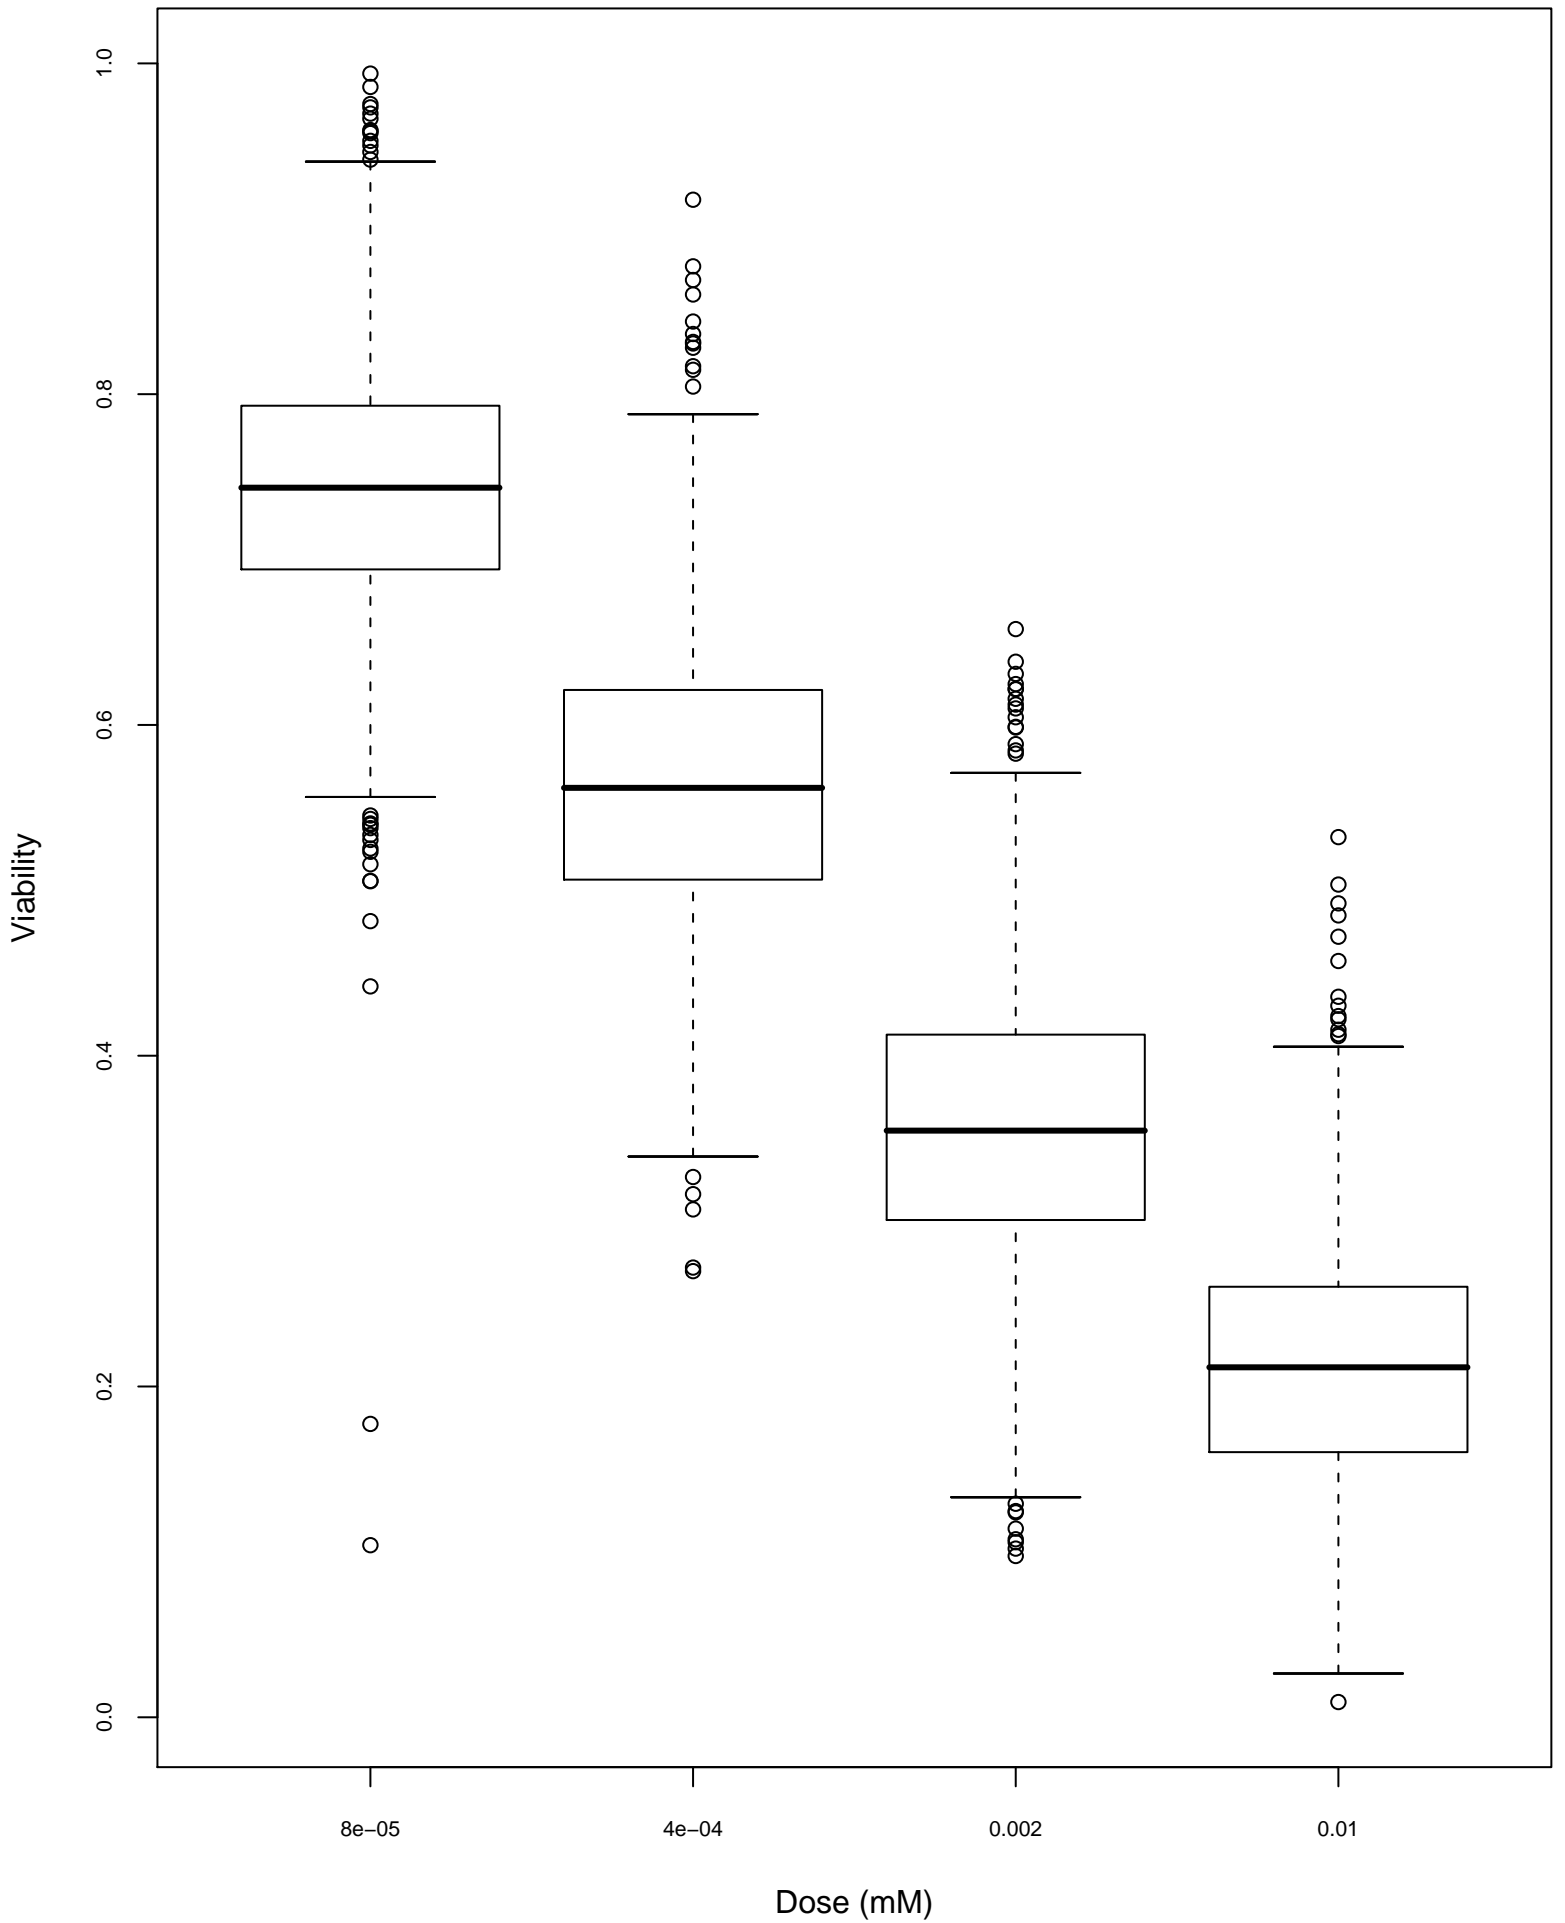

# Drug Busulf

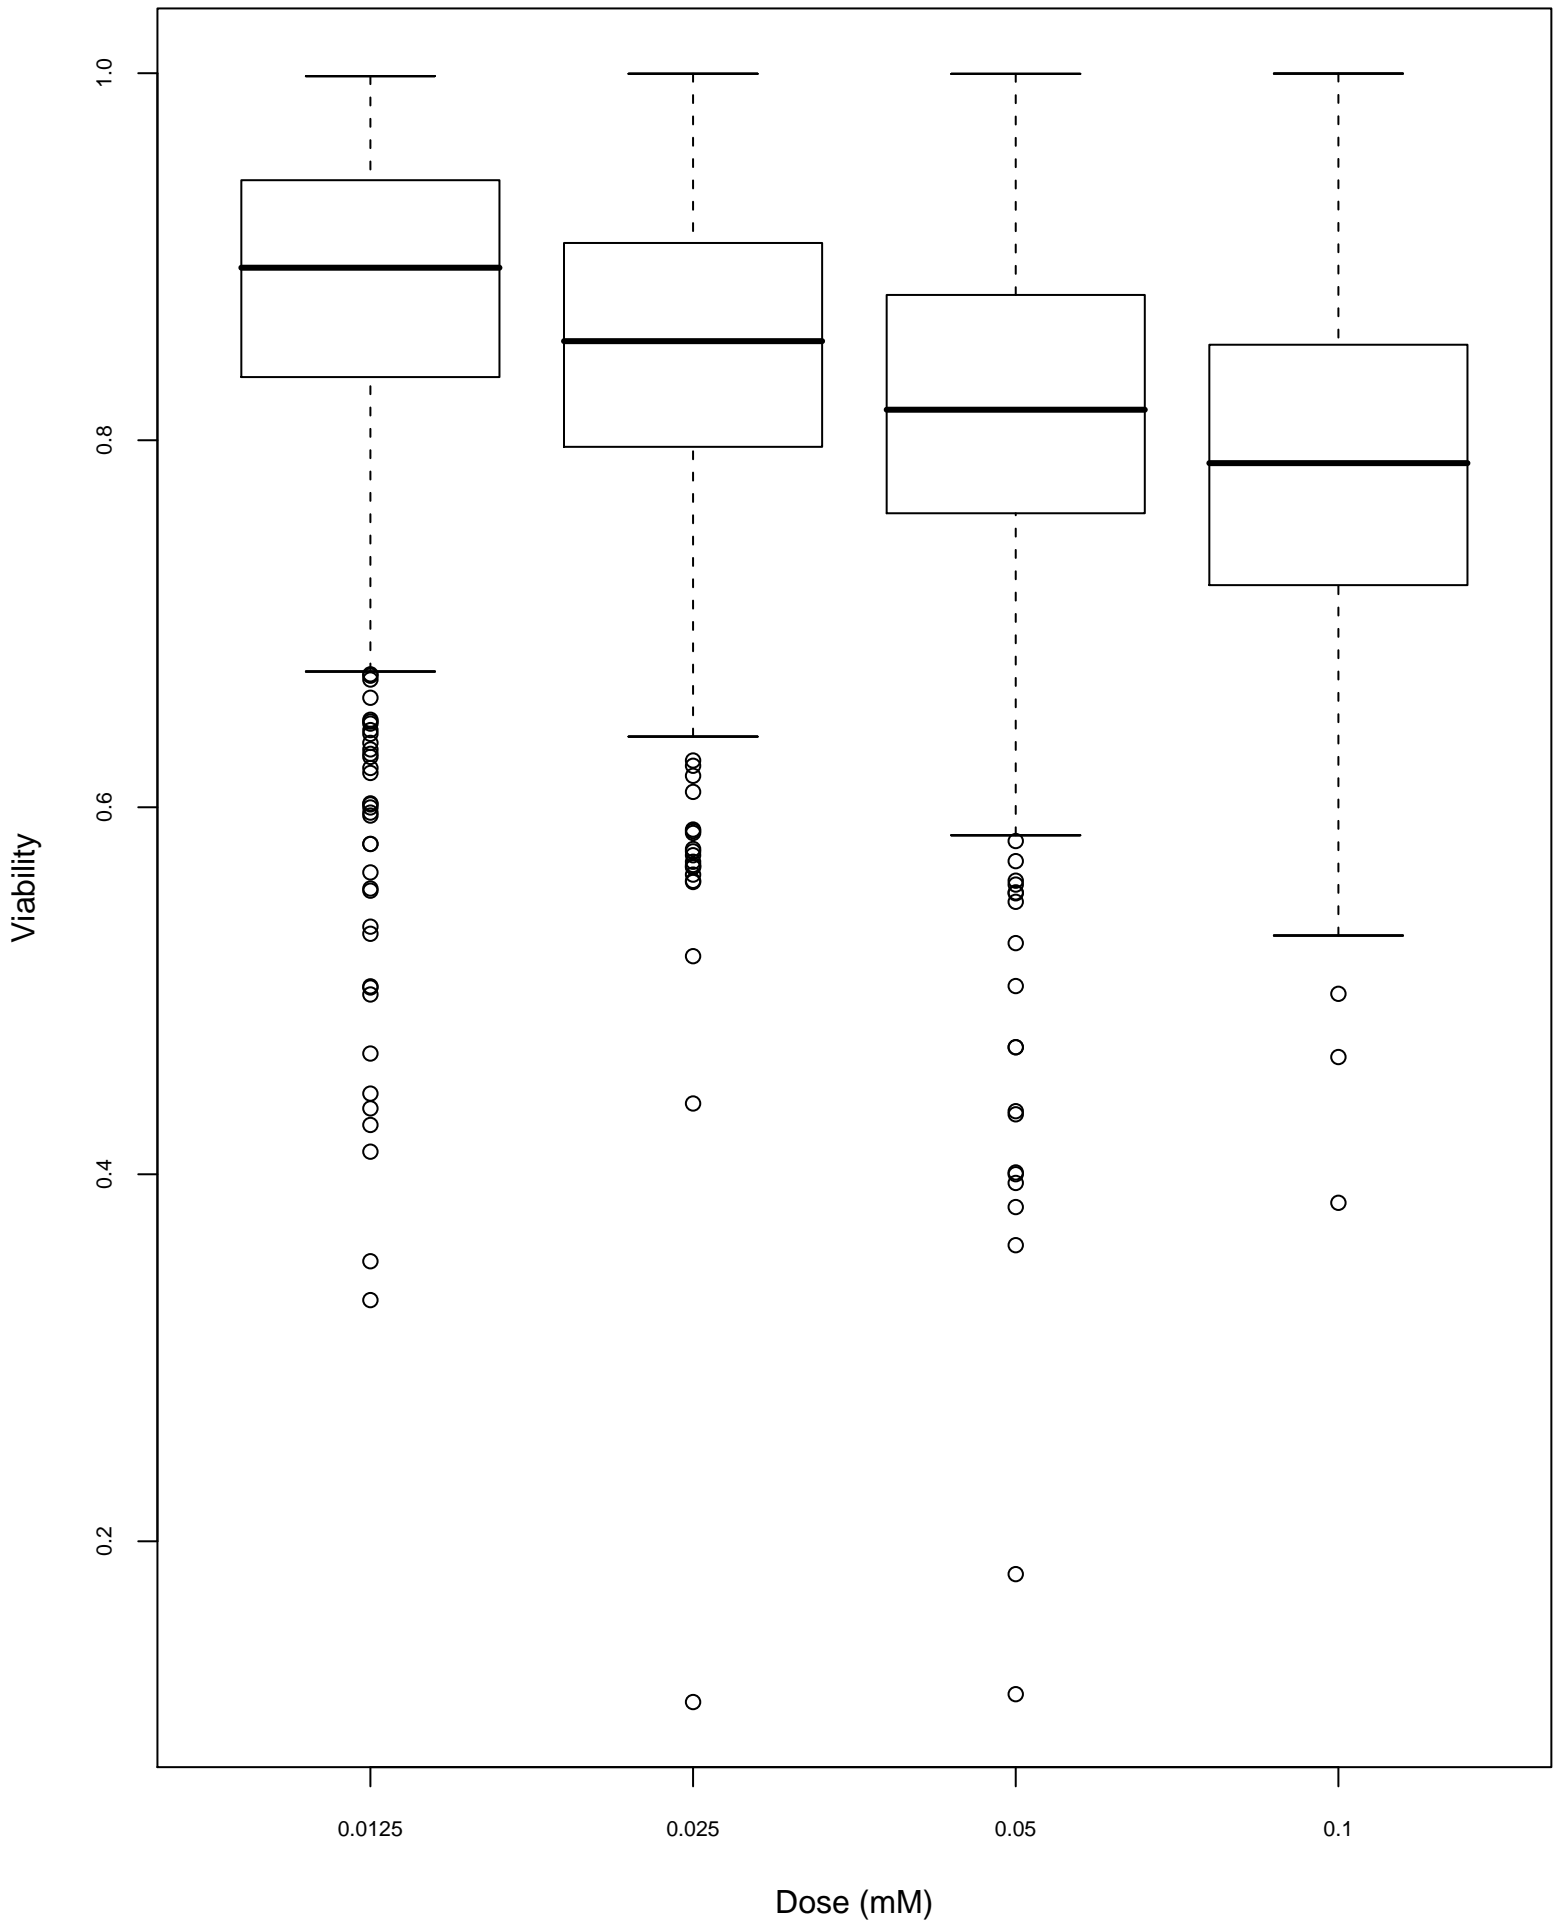

# Drug Carbo

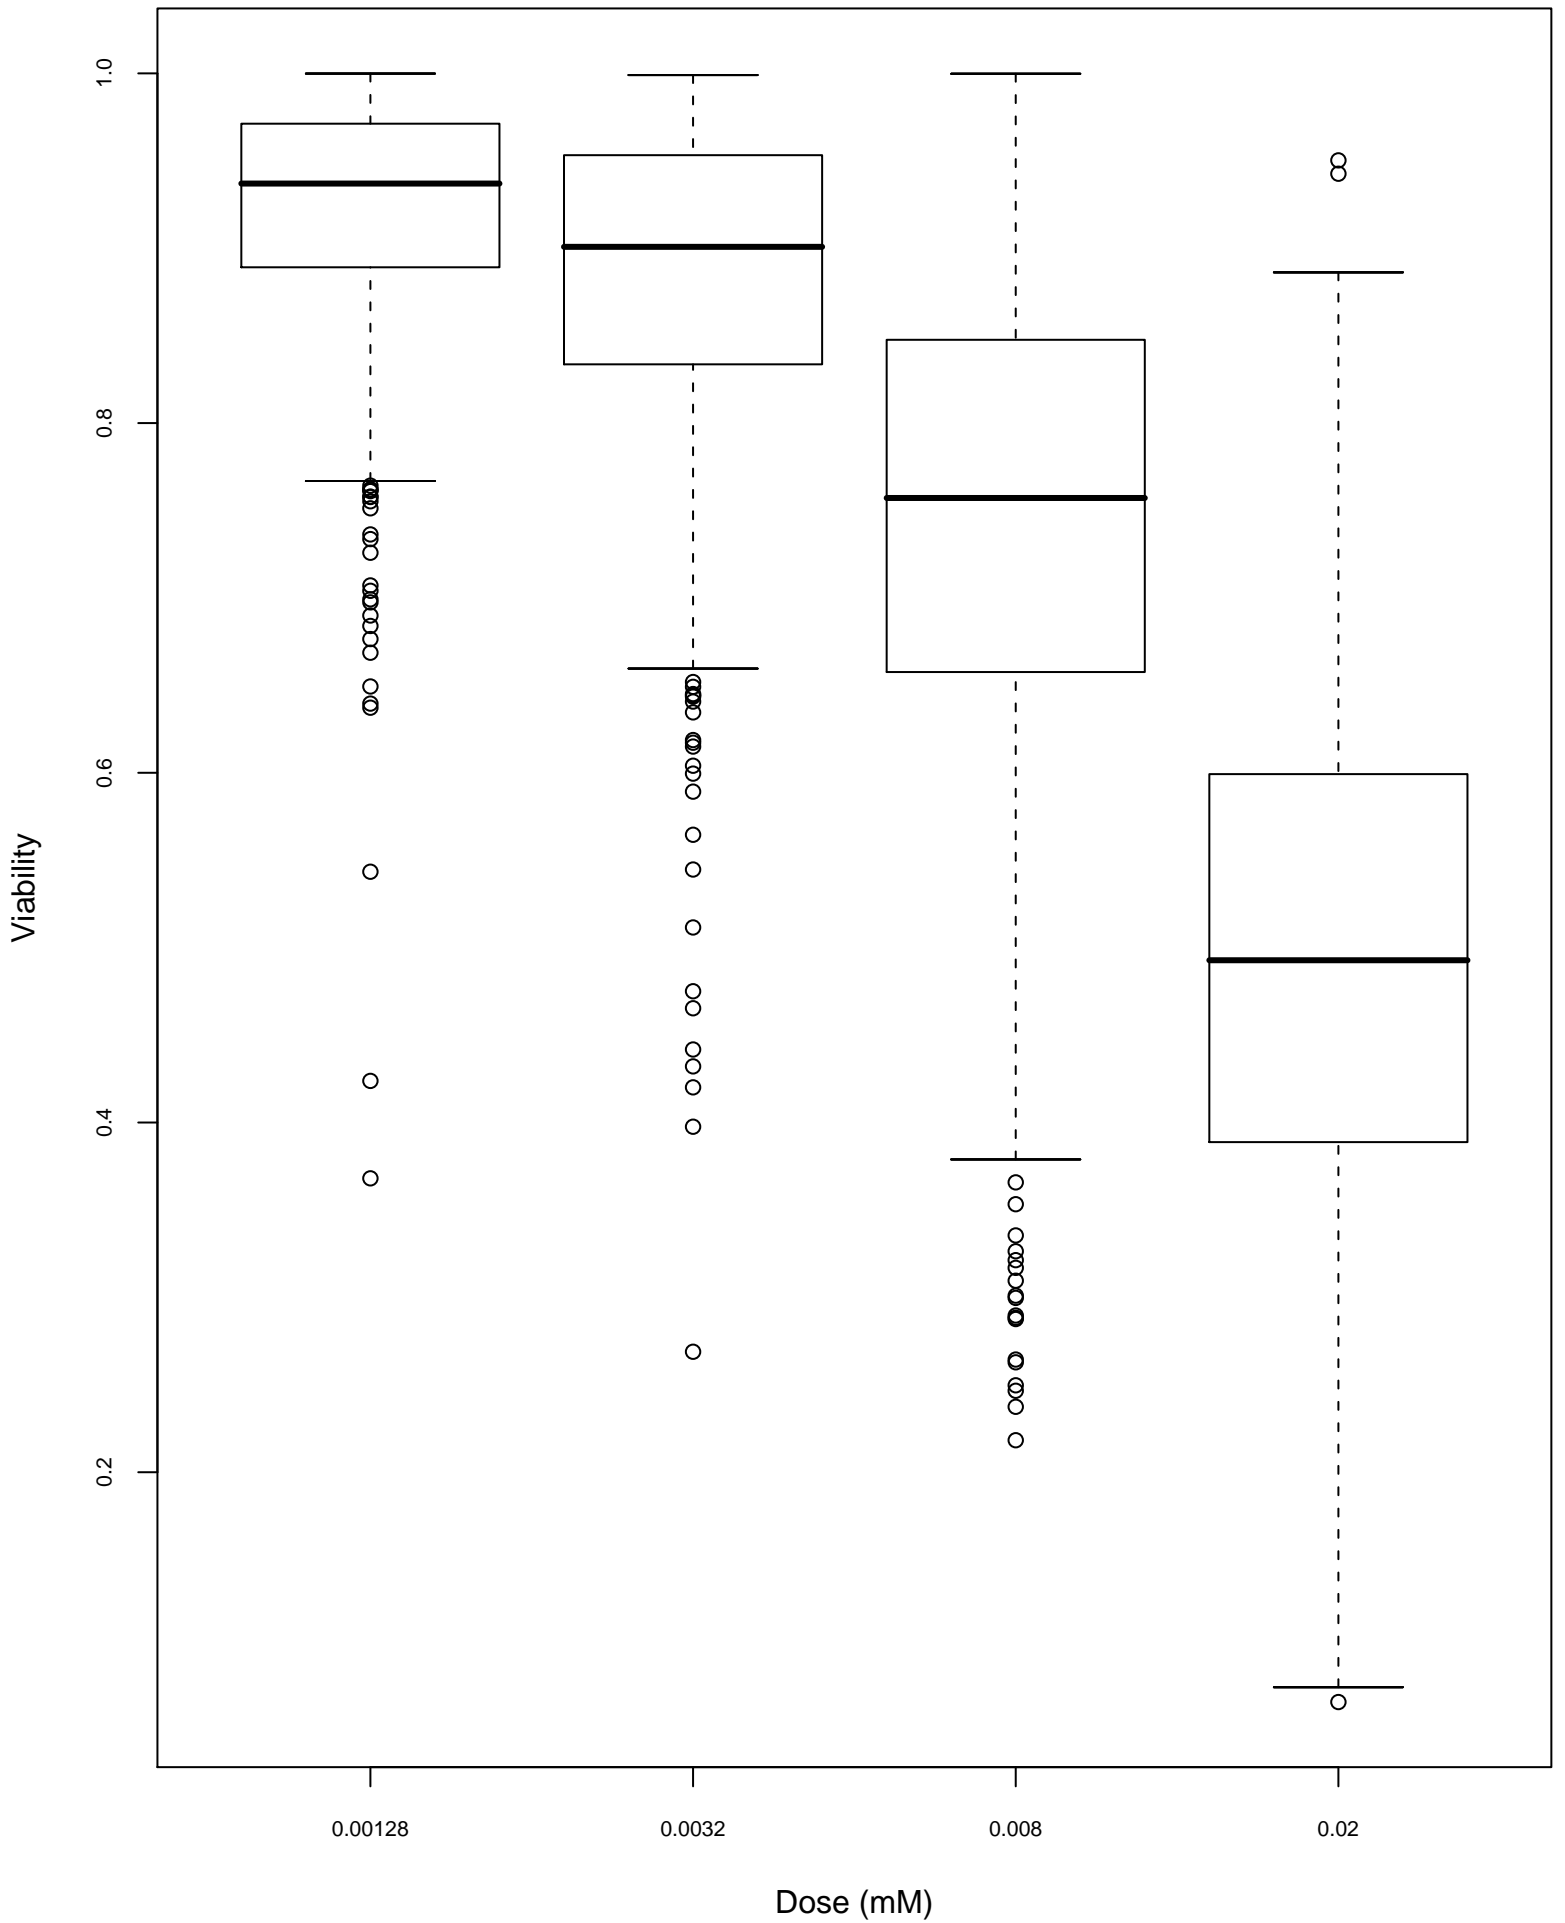

# Drug Clad

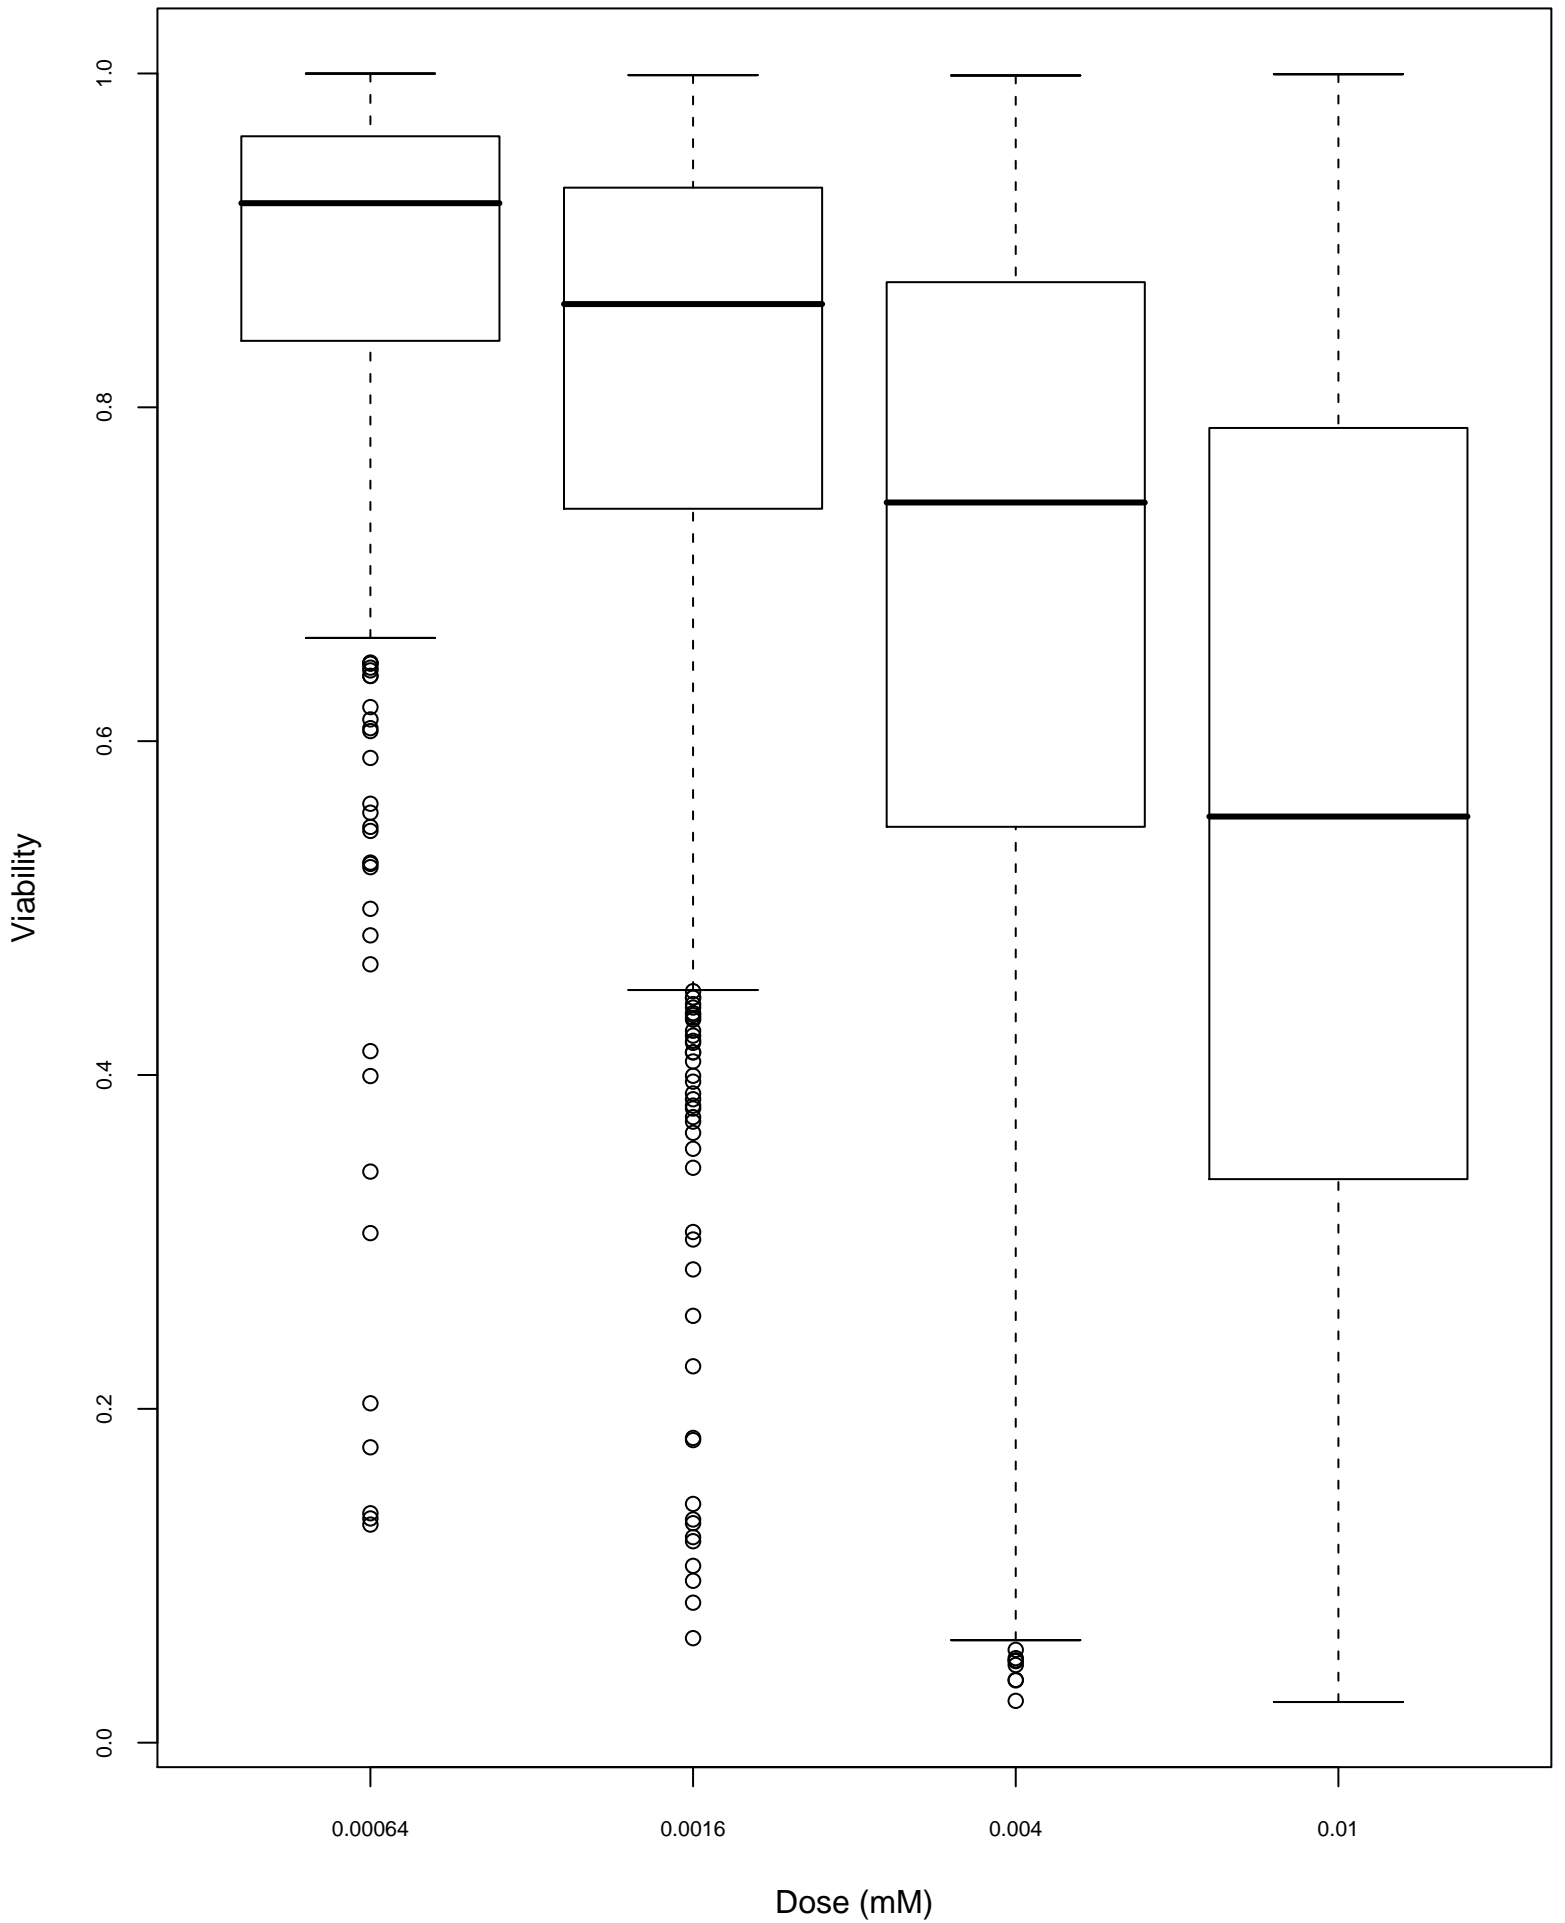

# Drug Cytar

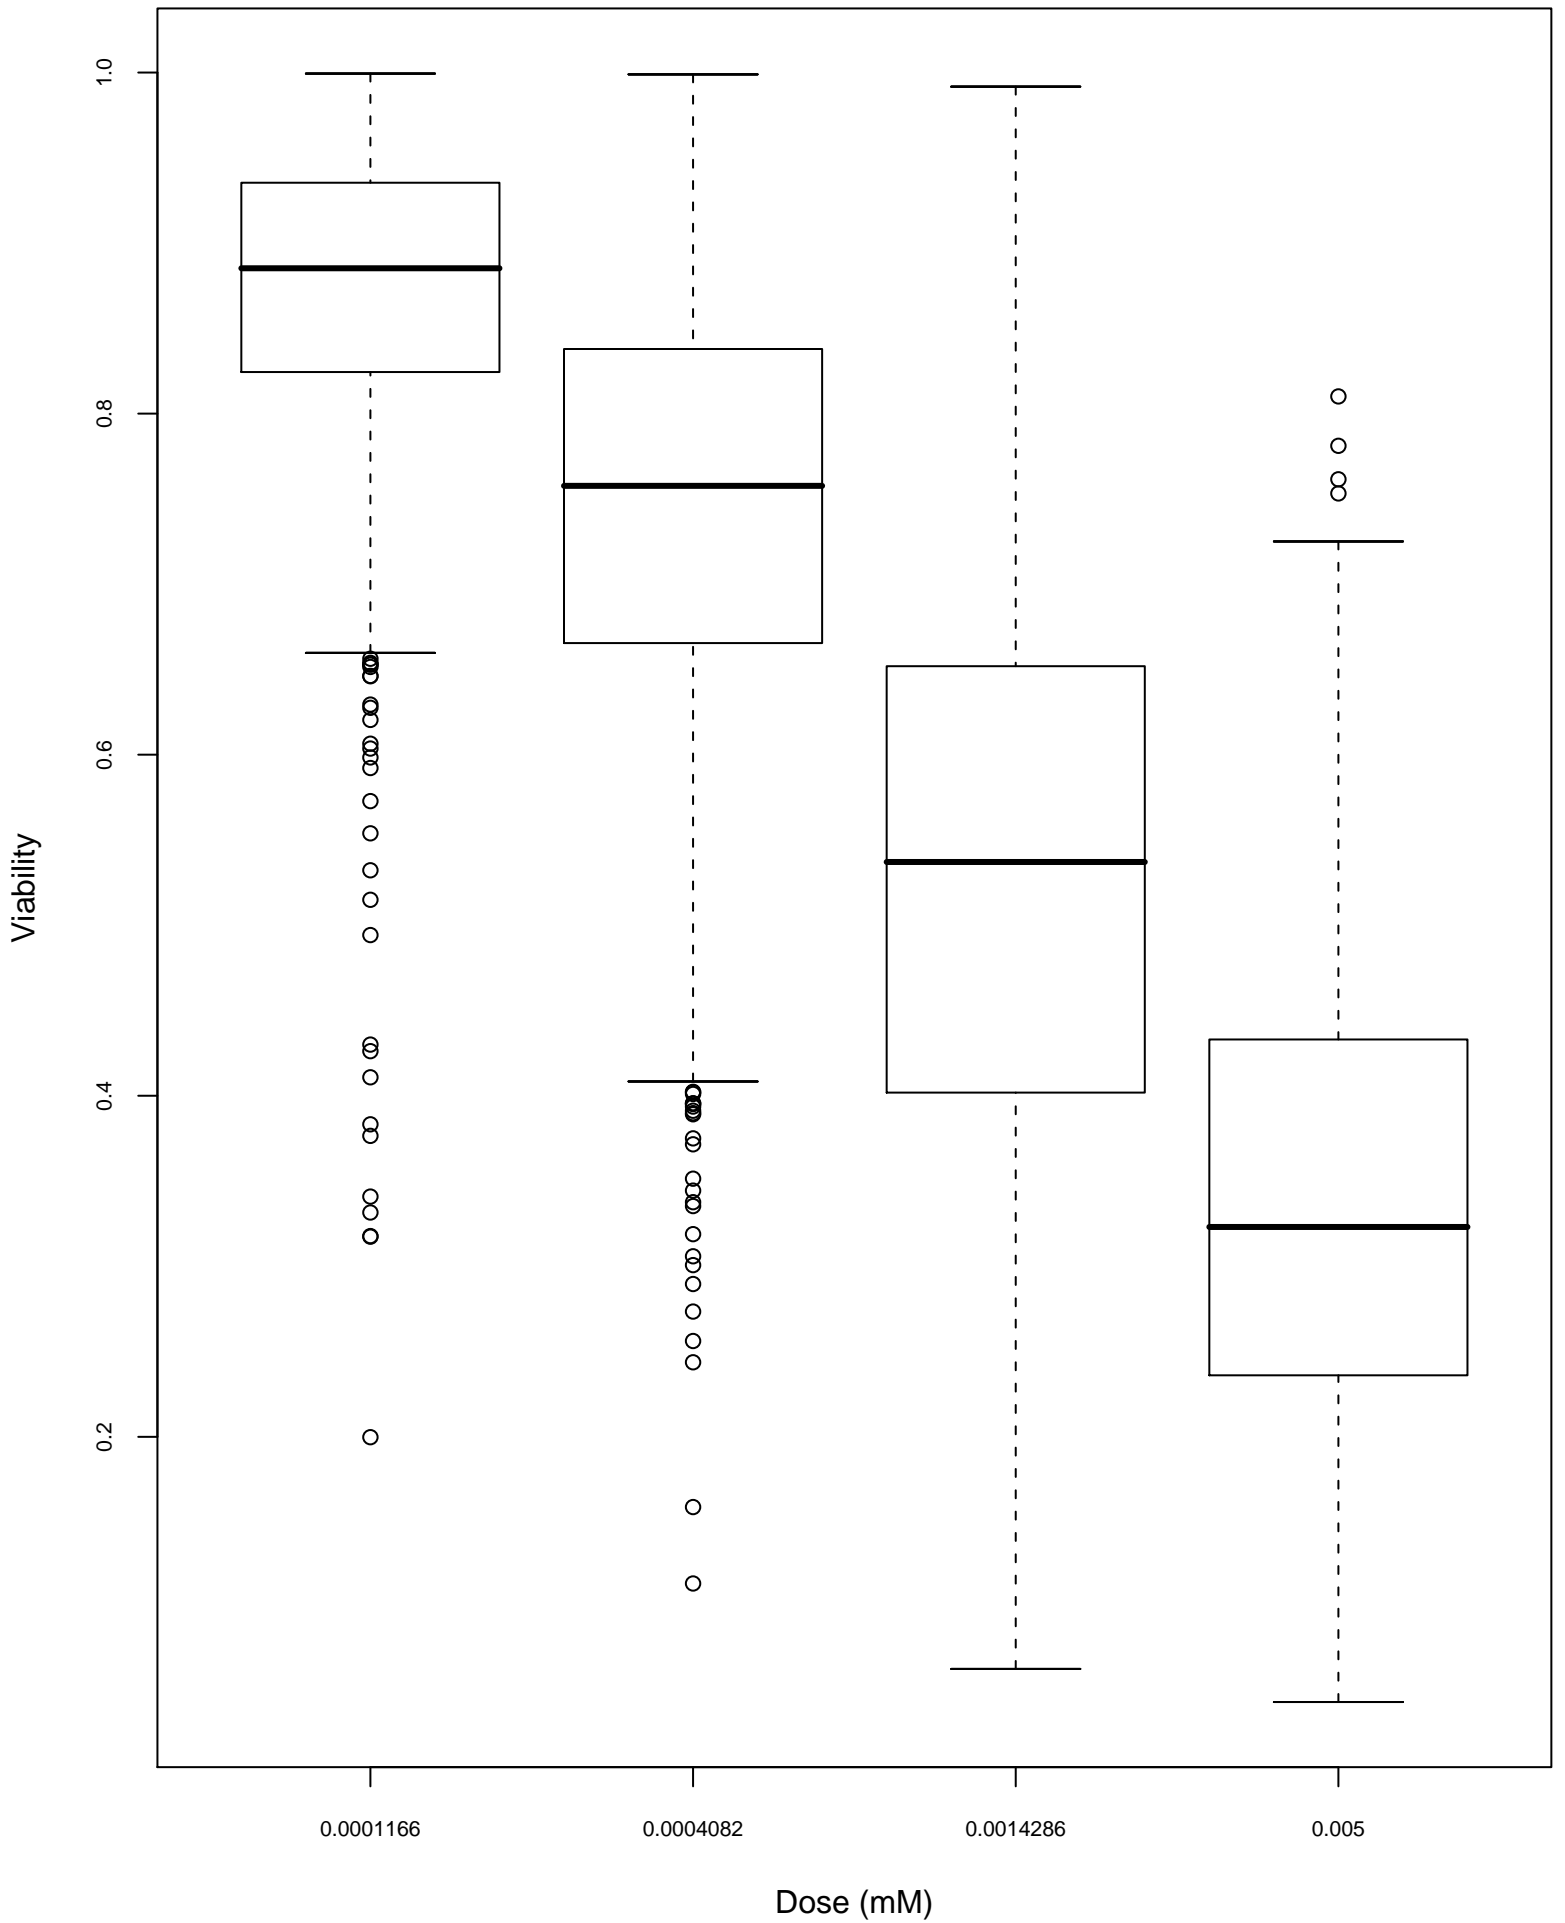



# Drug Daun

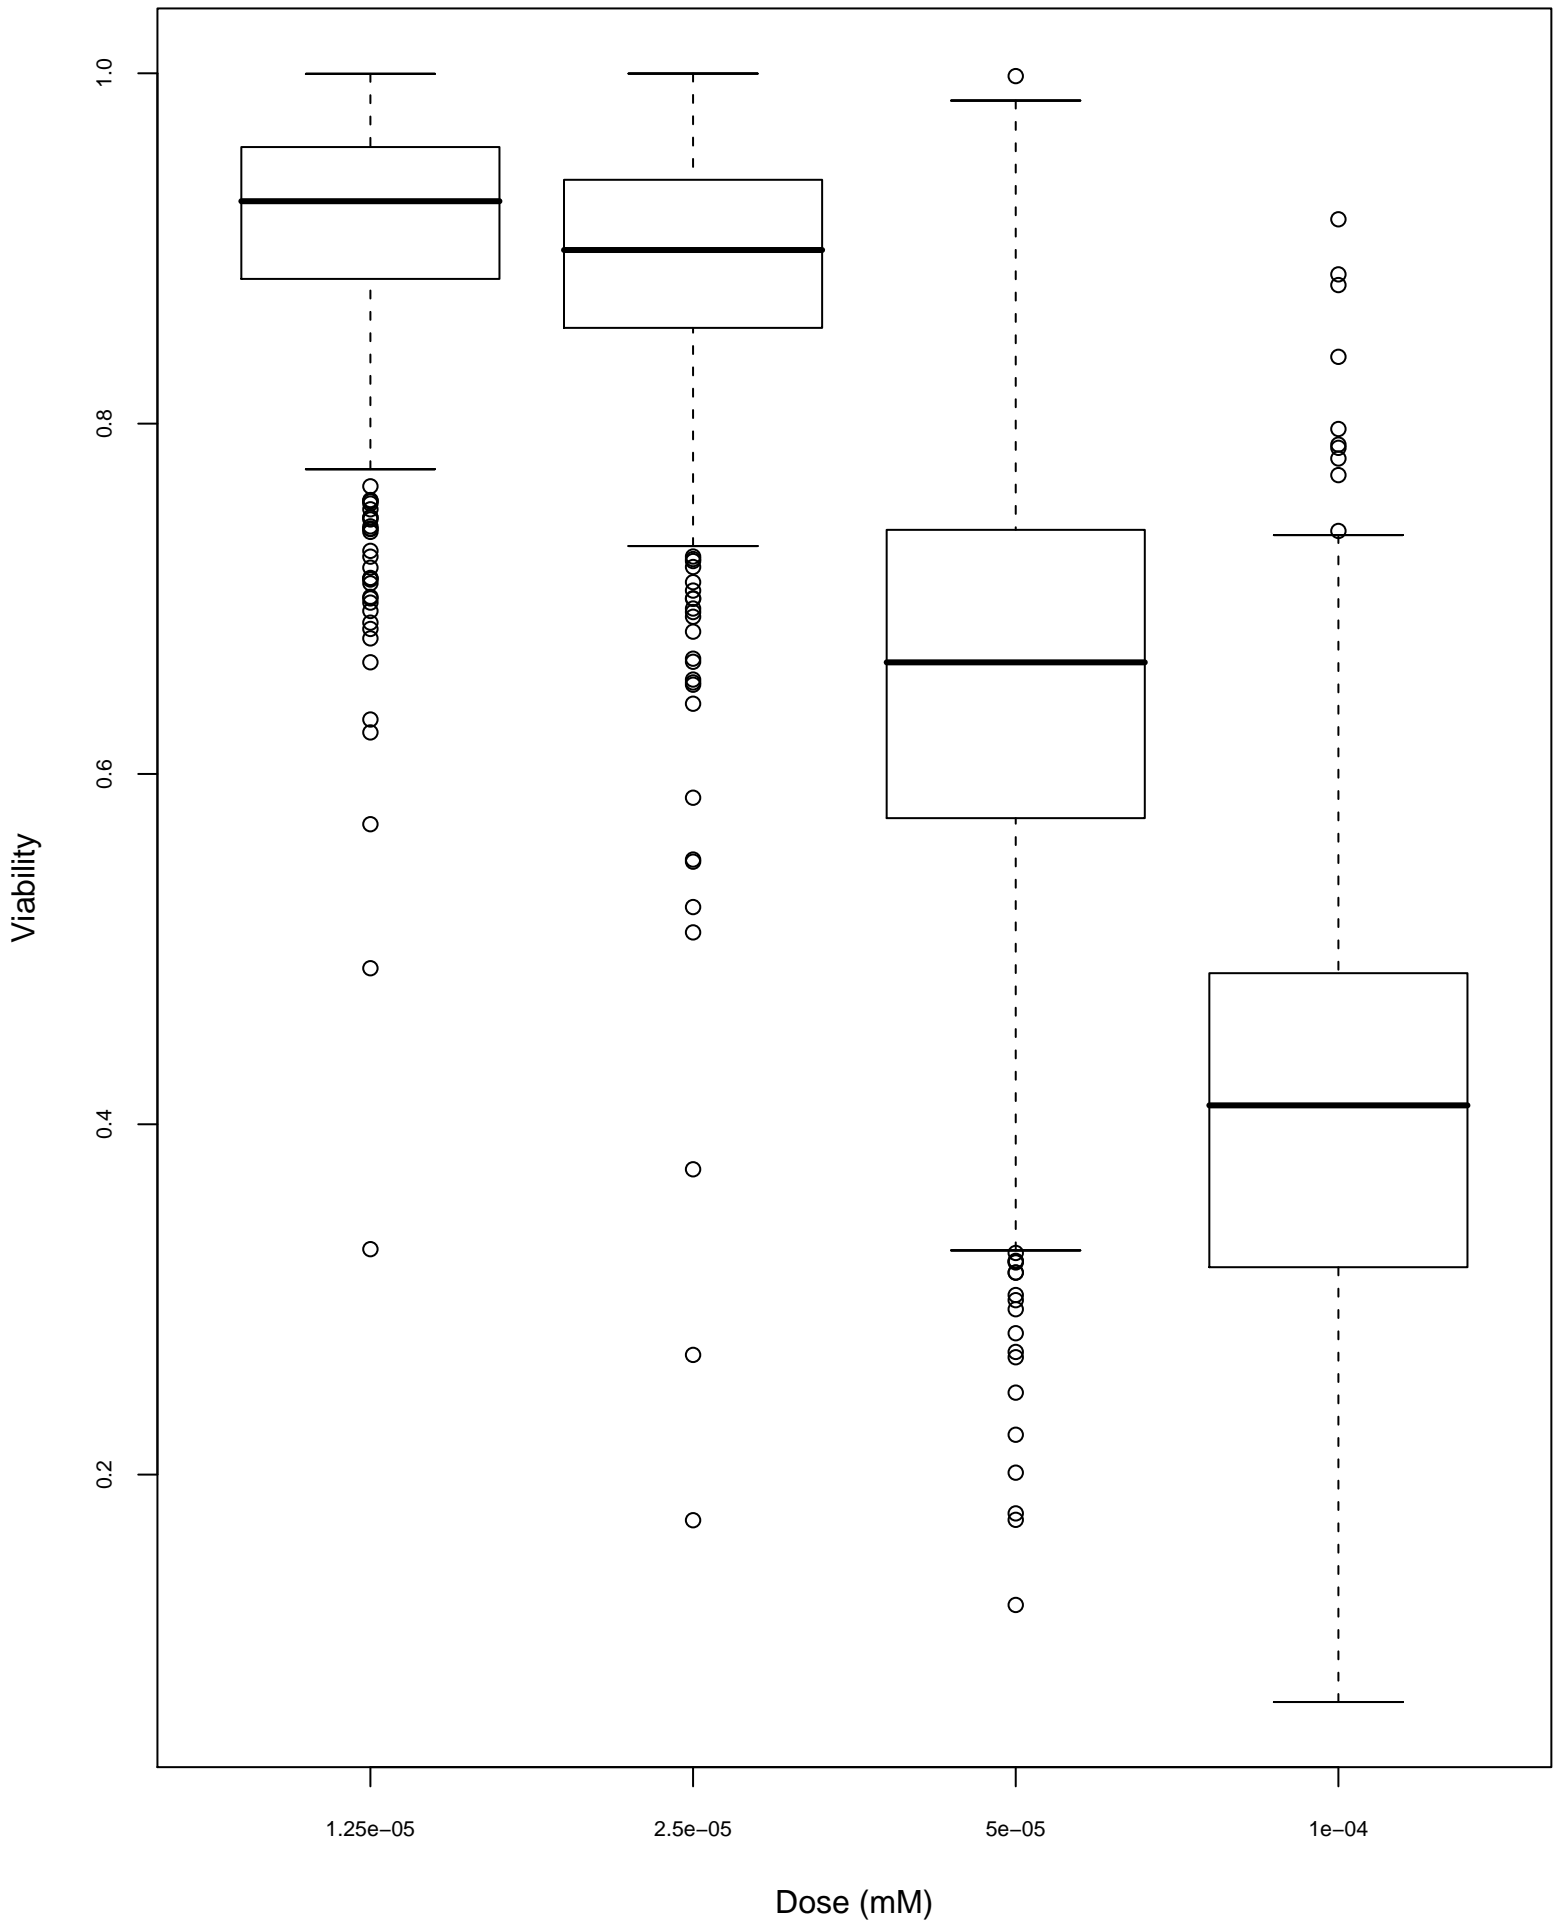

# Drug Doc

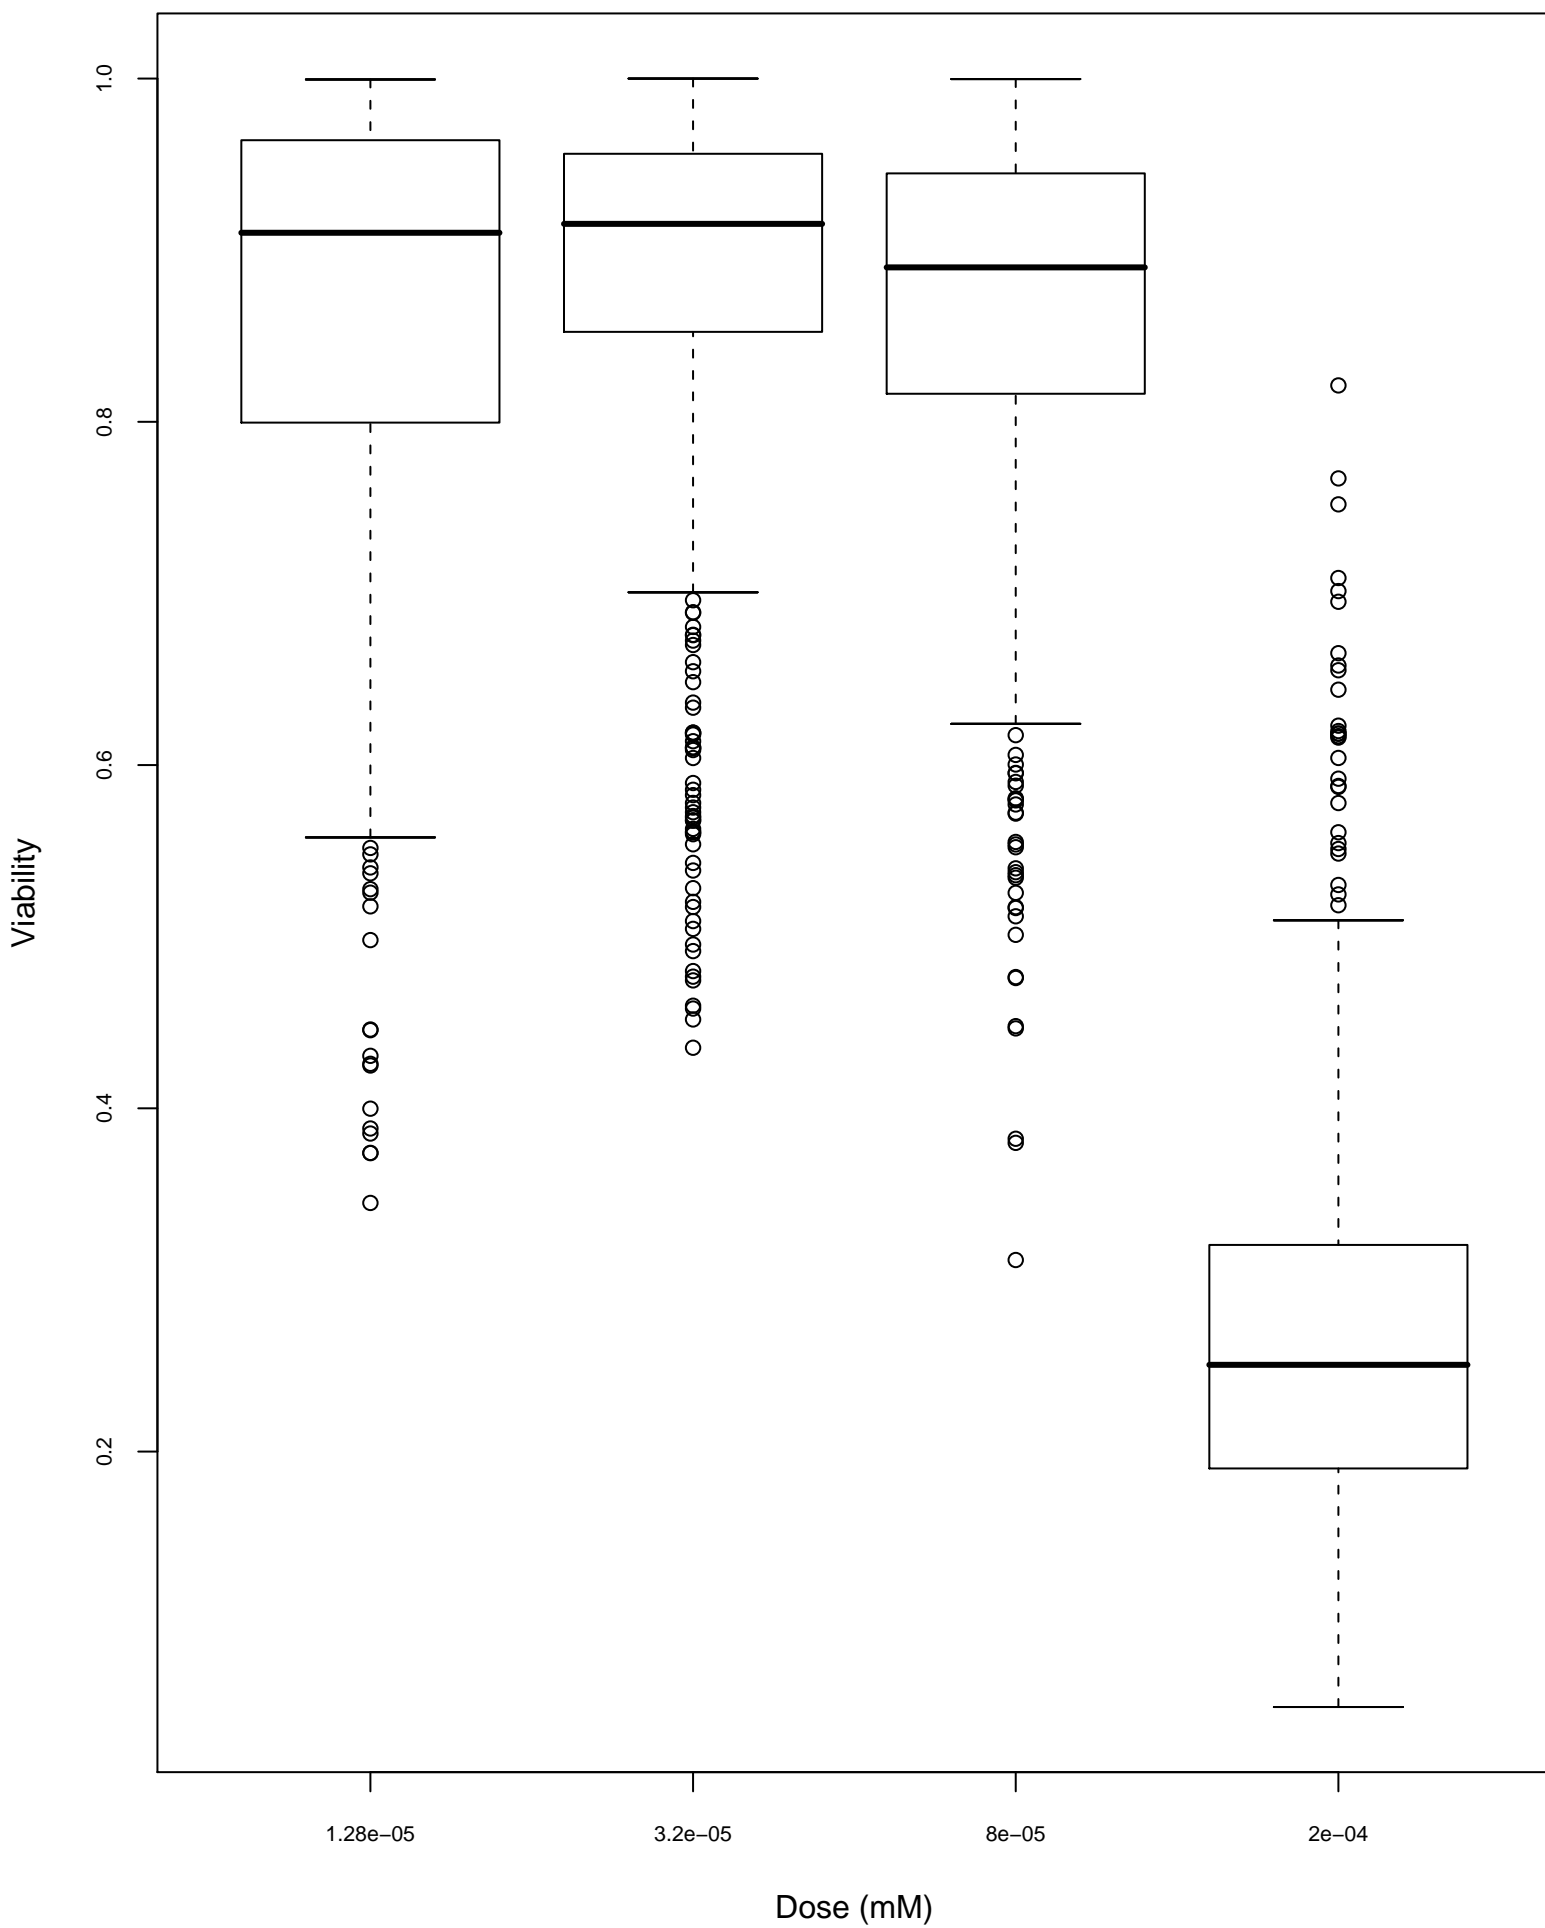

# Drug Dox

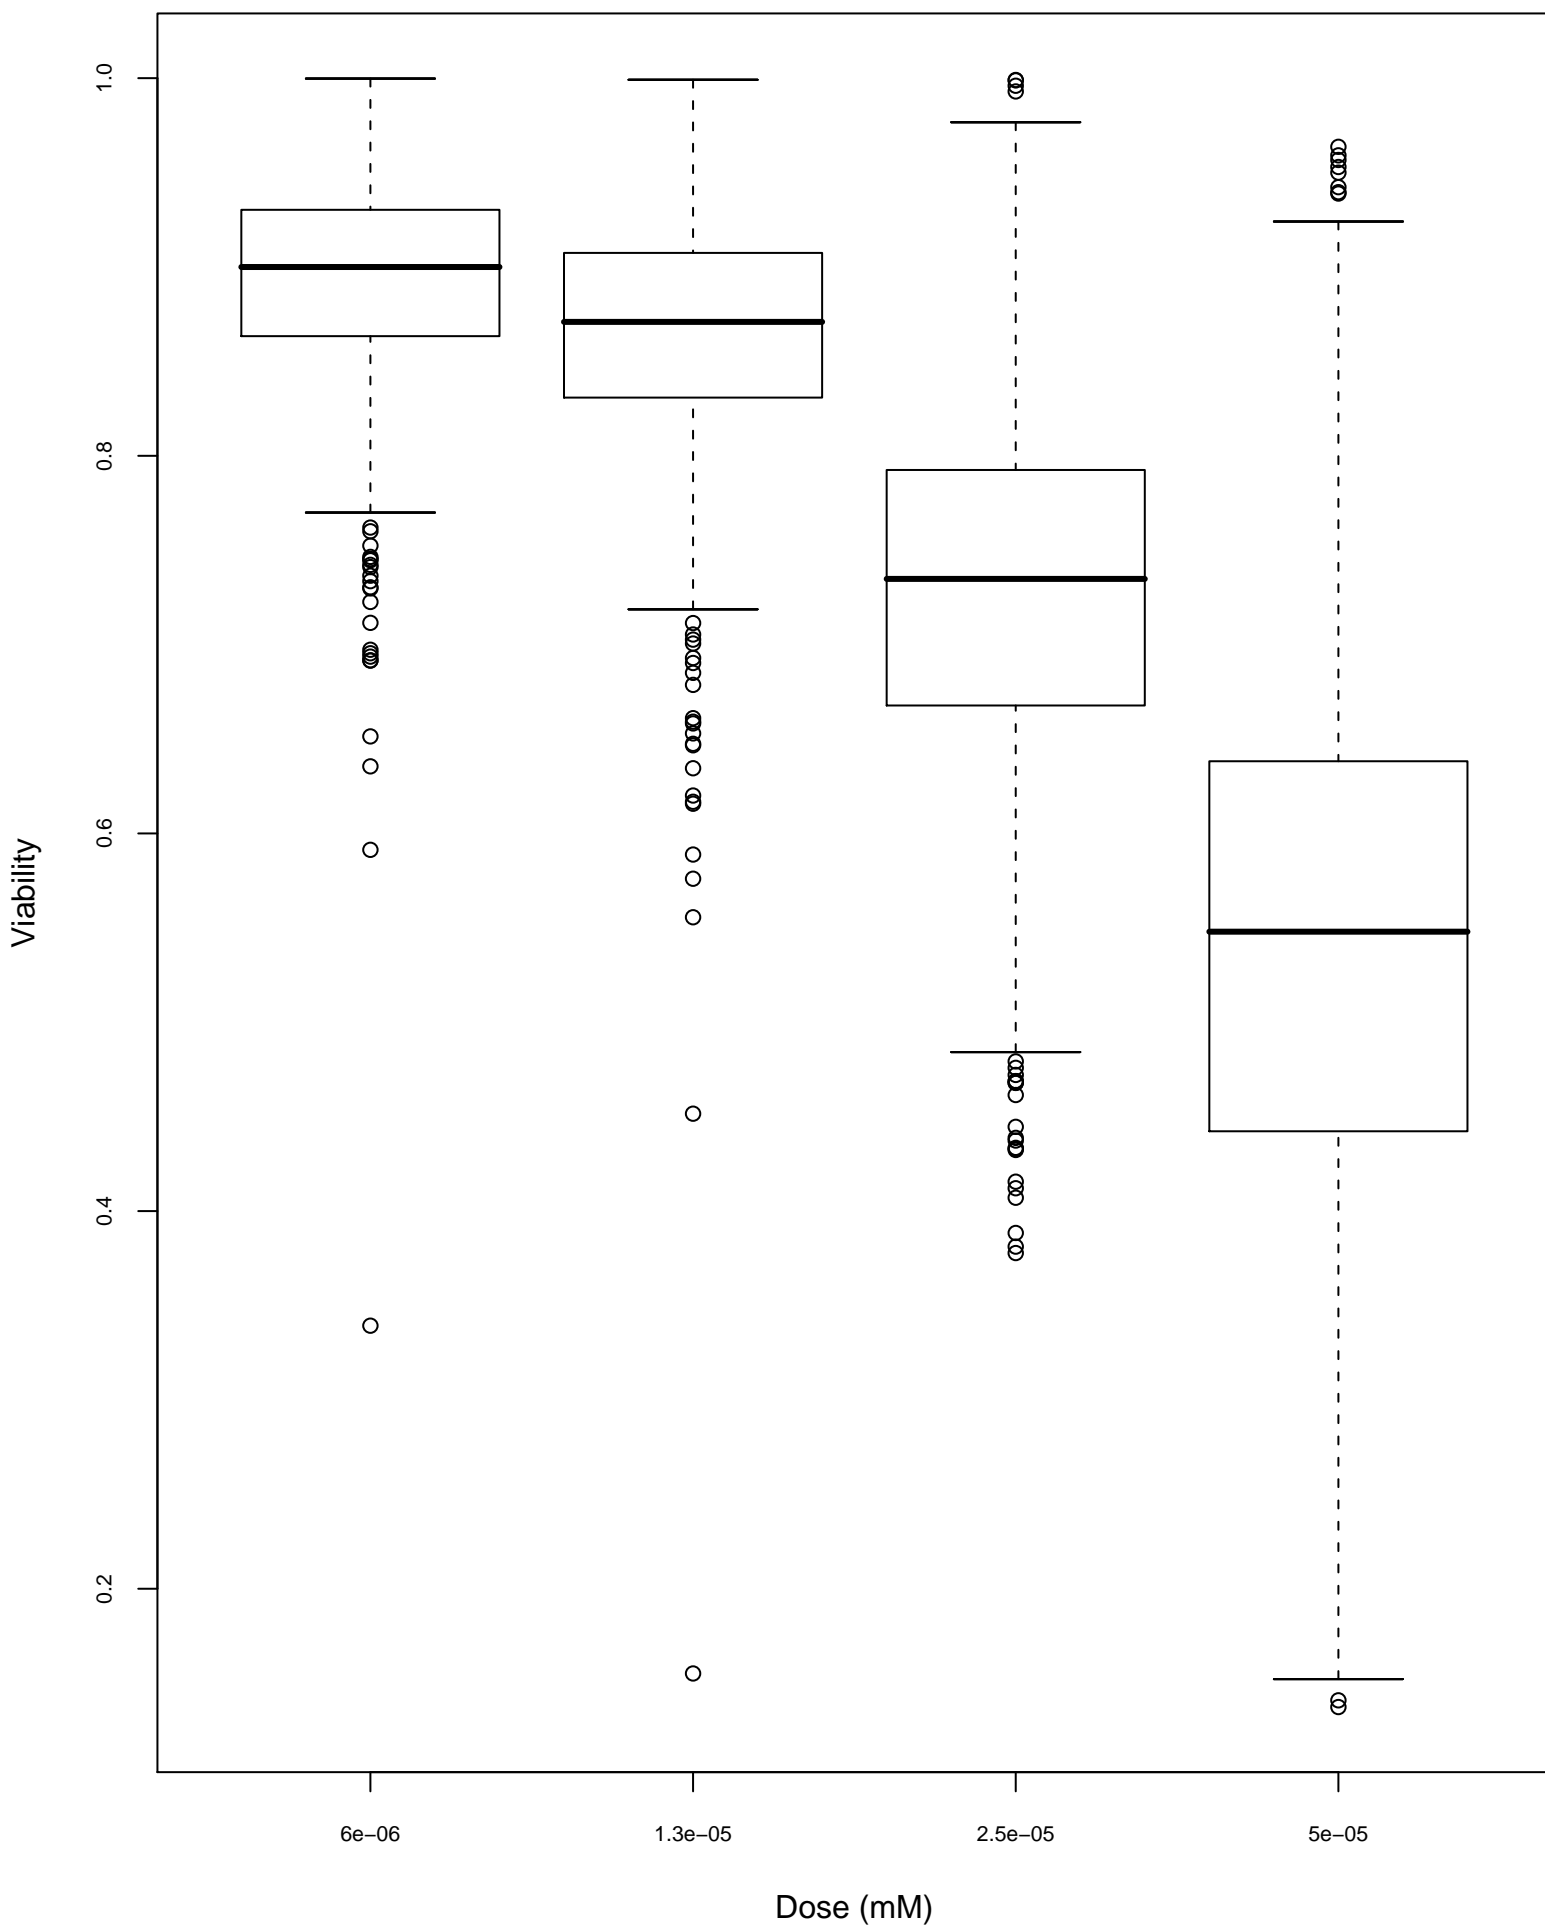

# Drug Epi

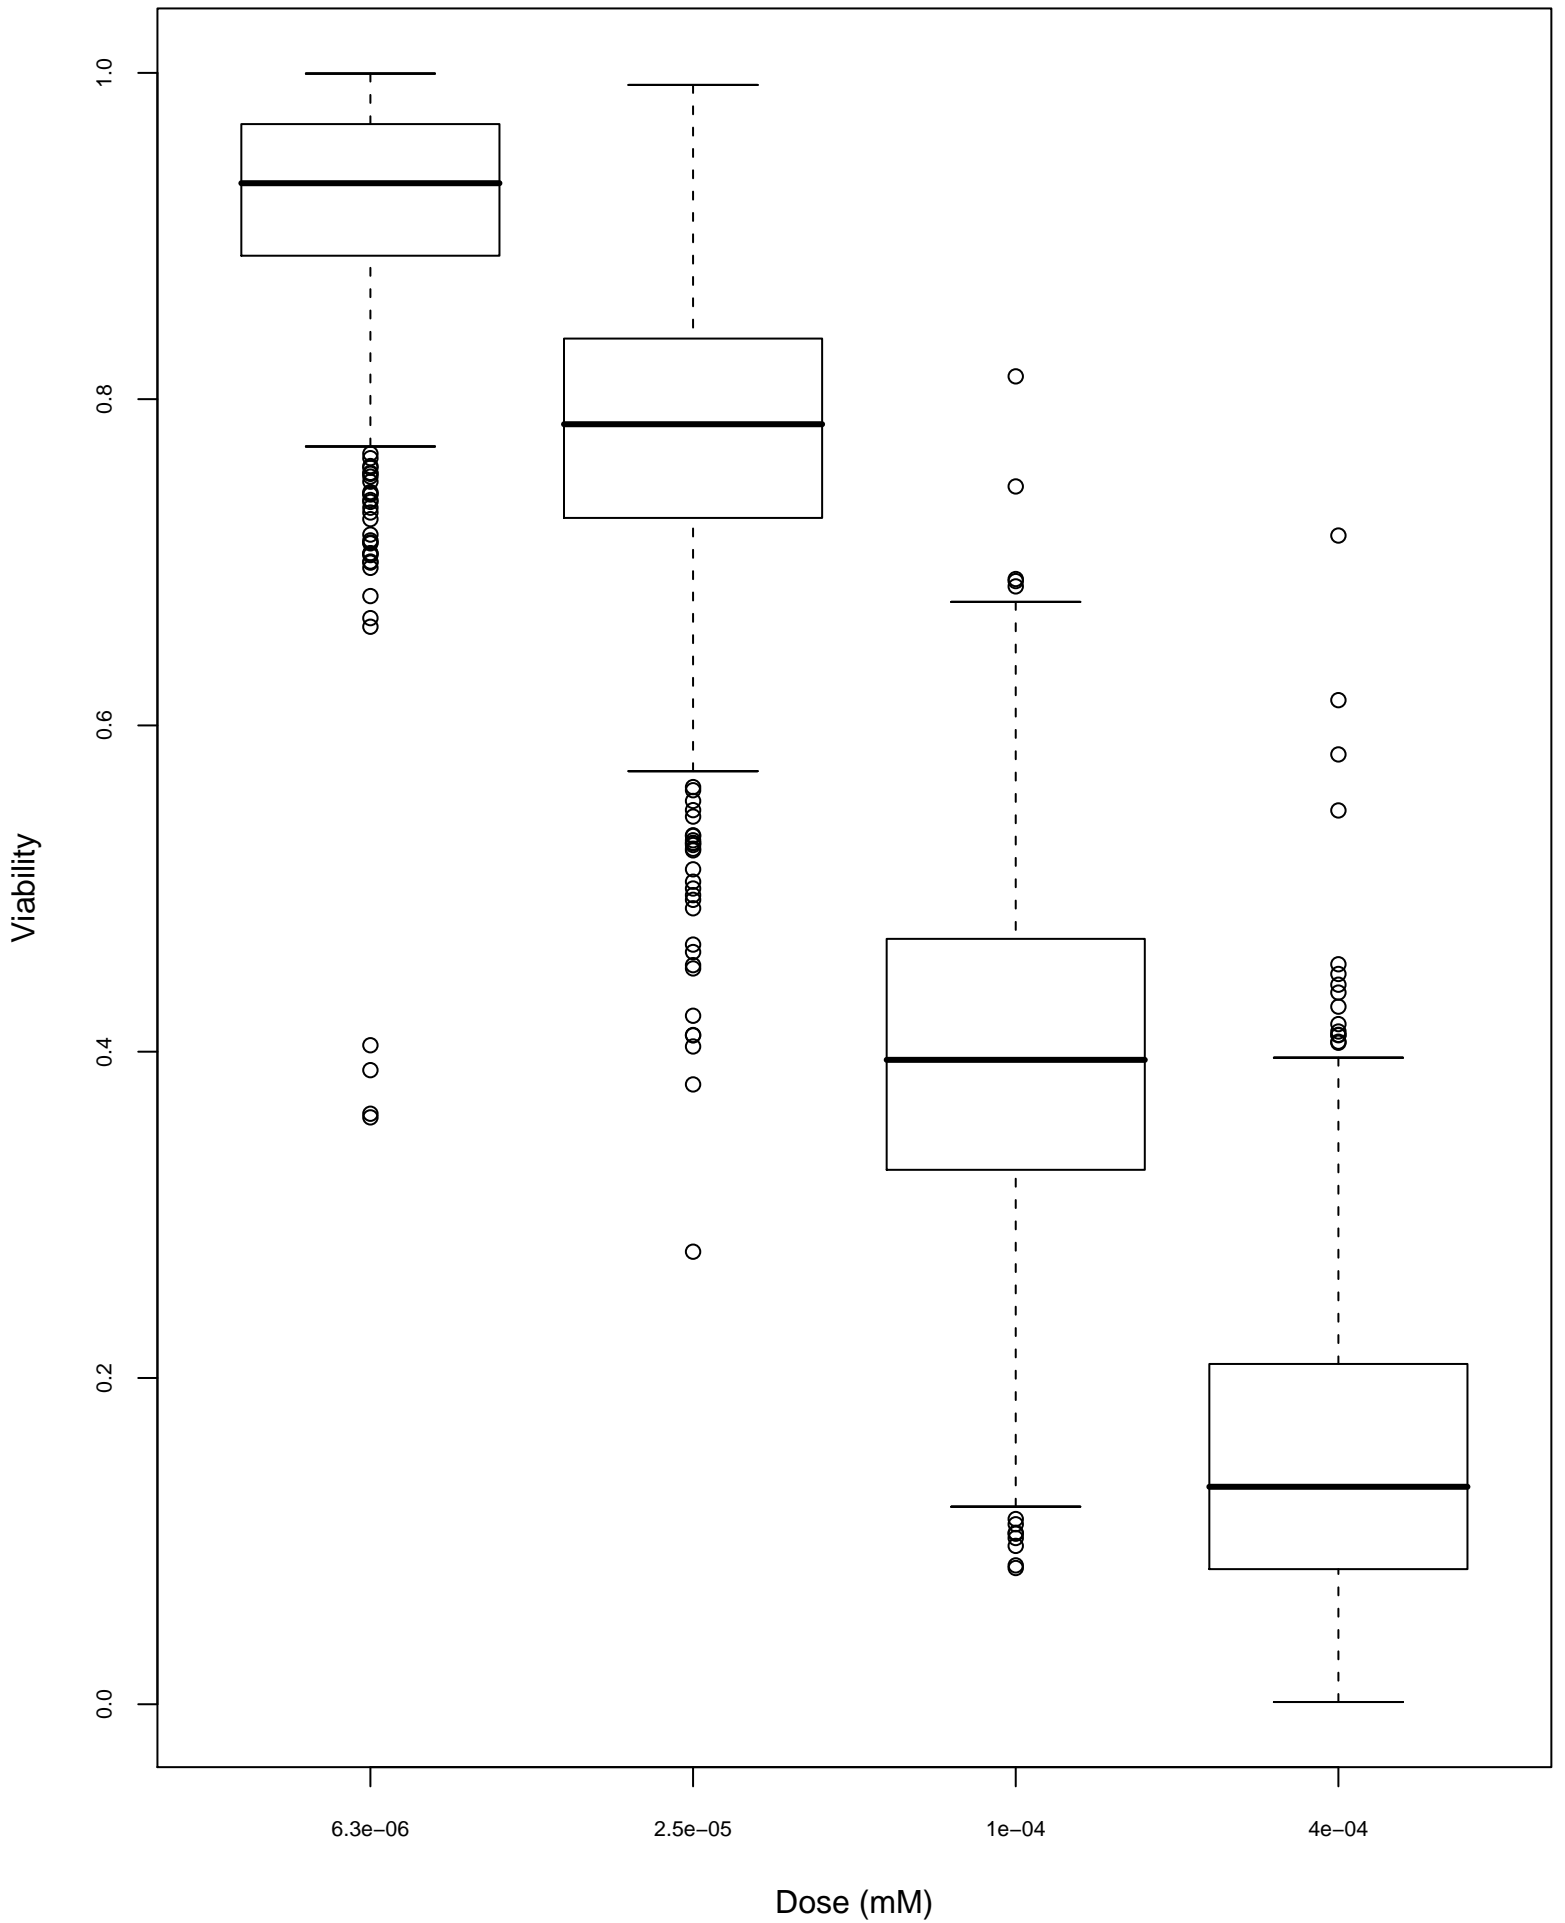

# Drug Etop

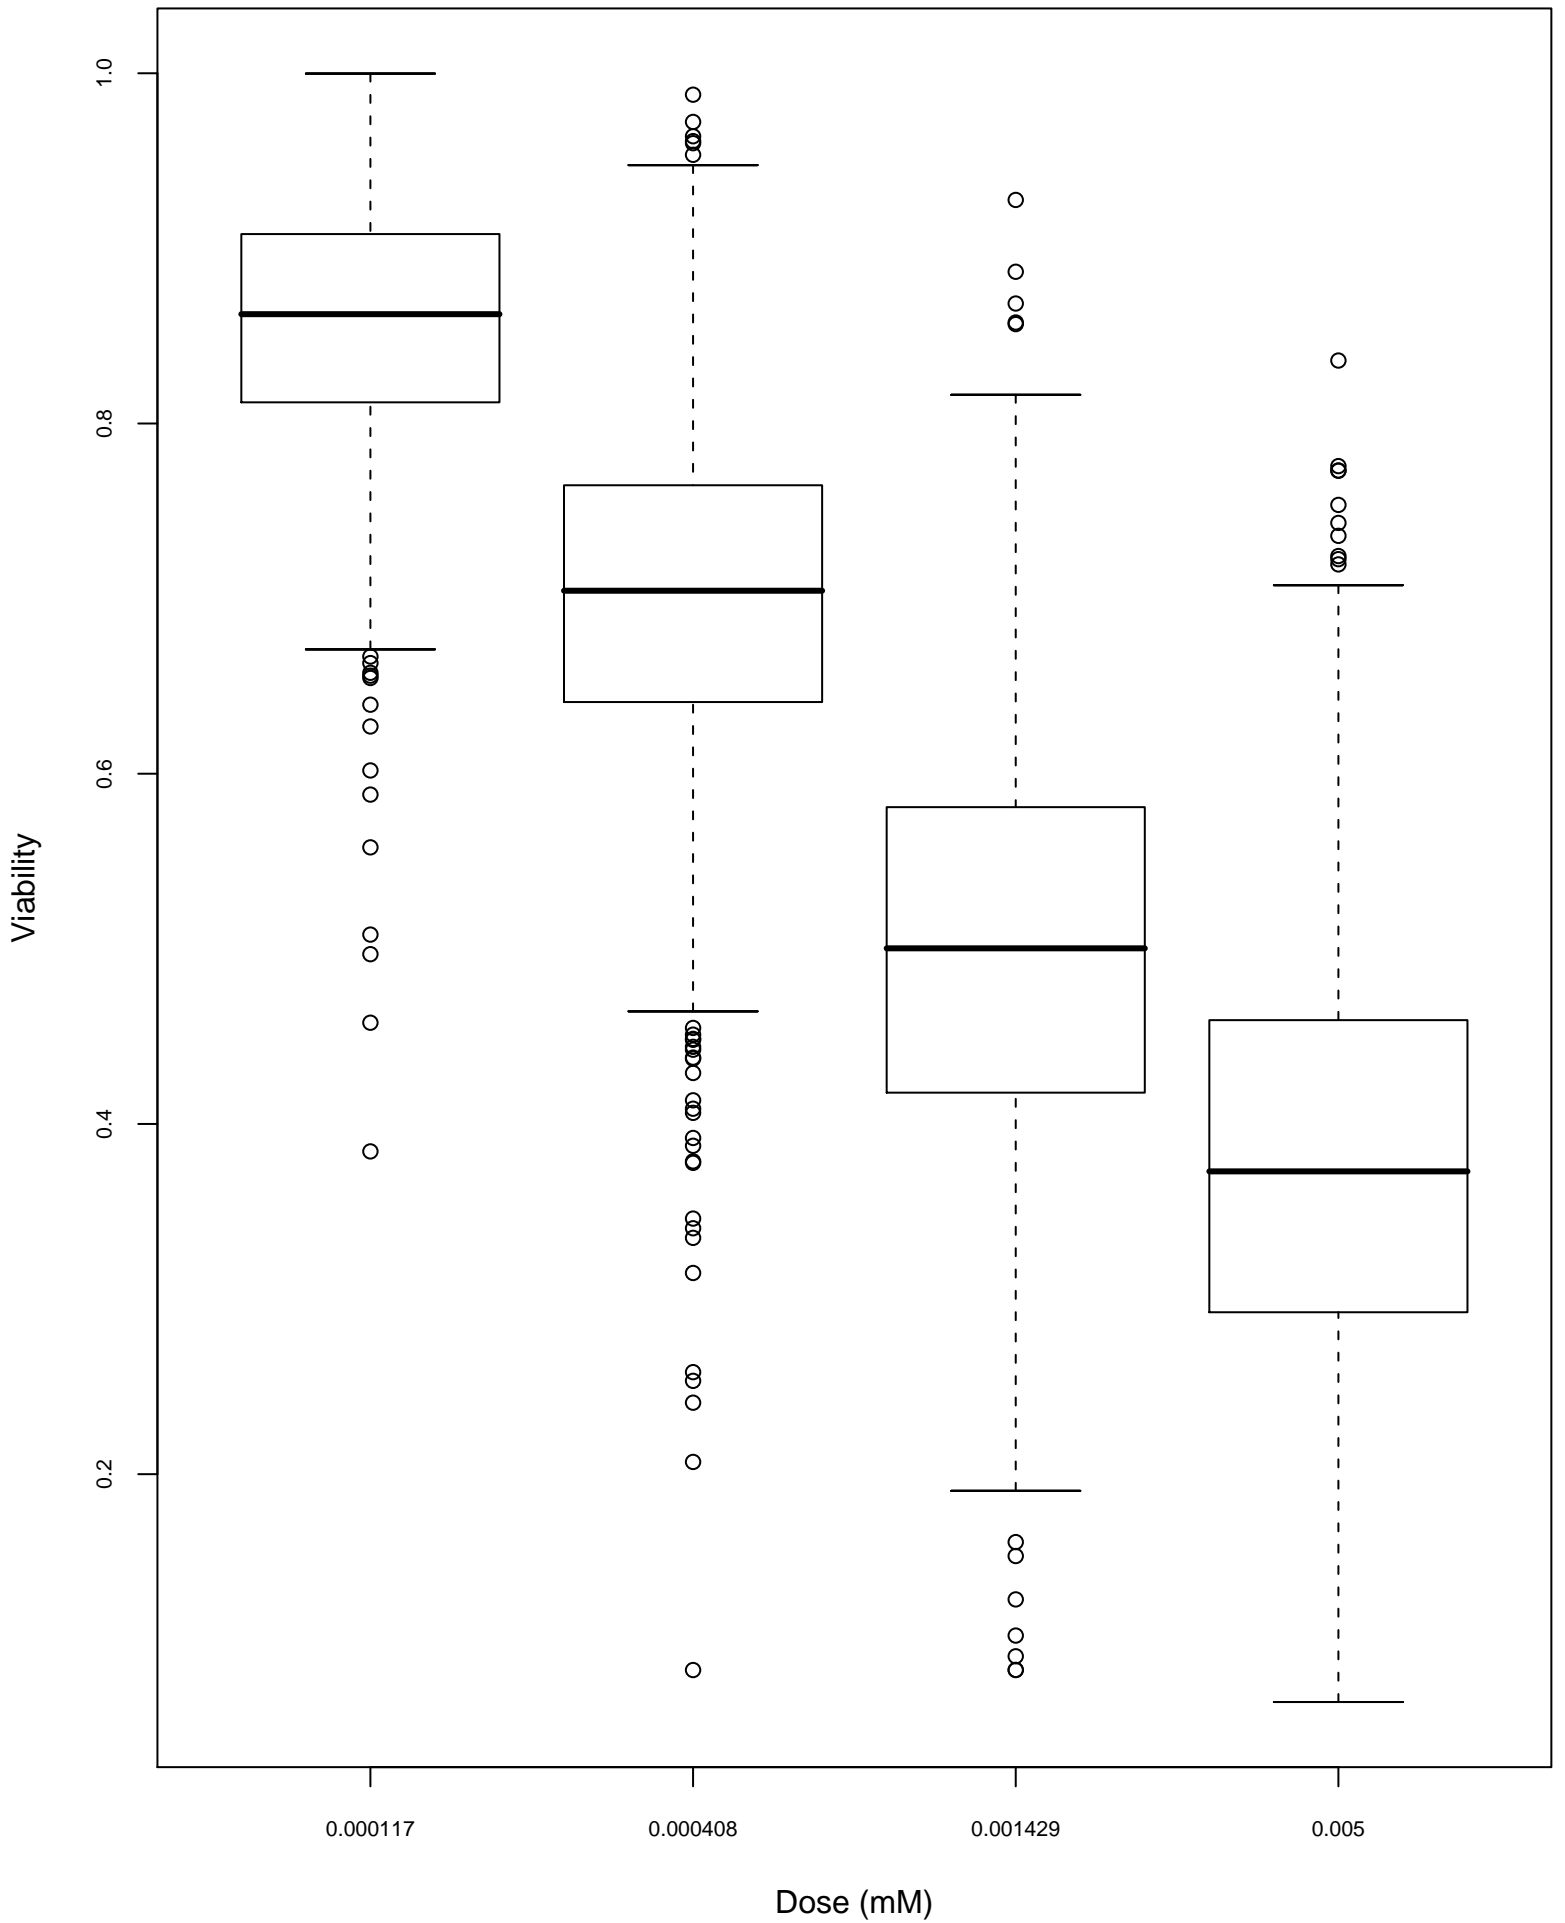

# Drug Flox

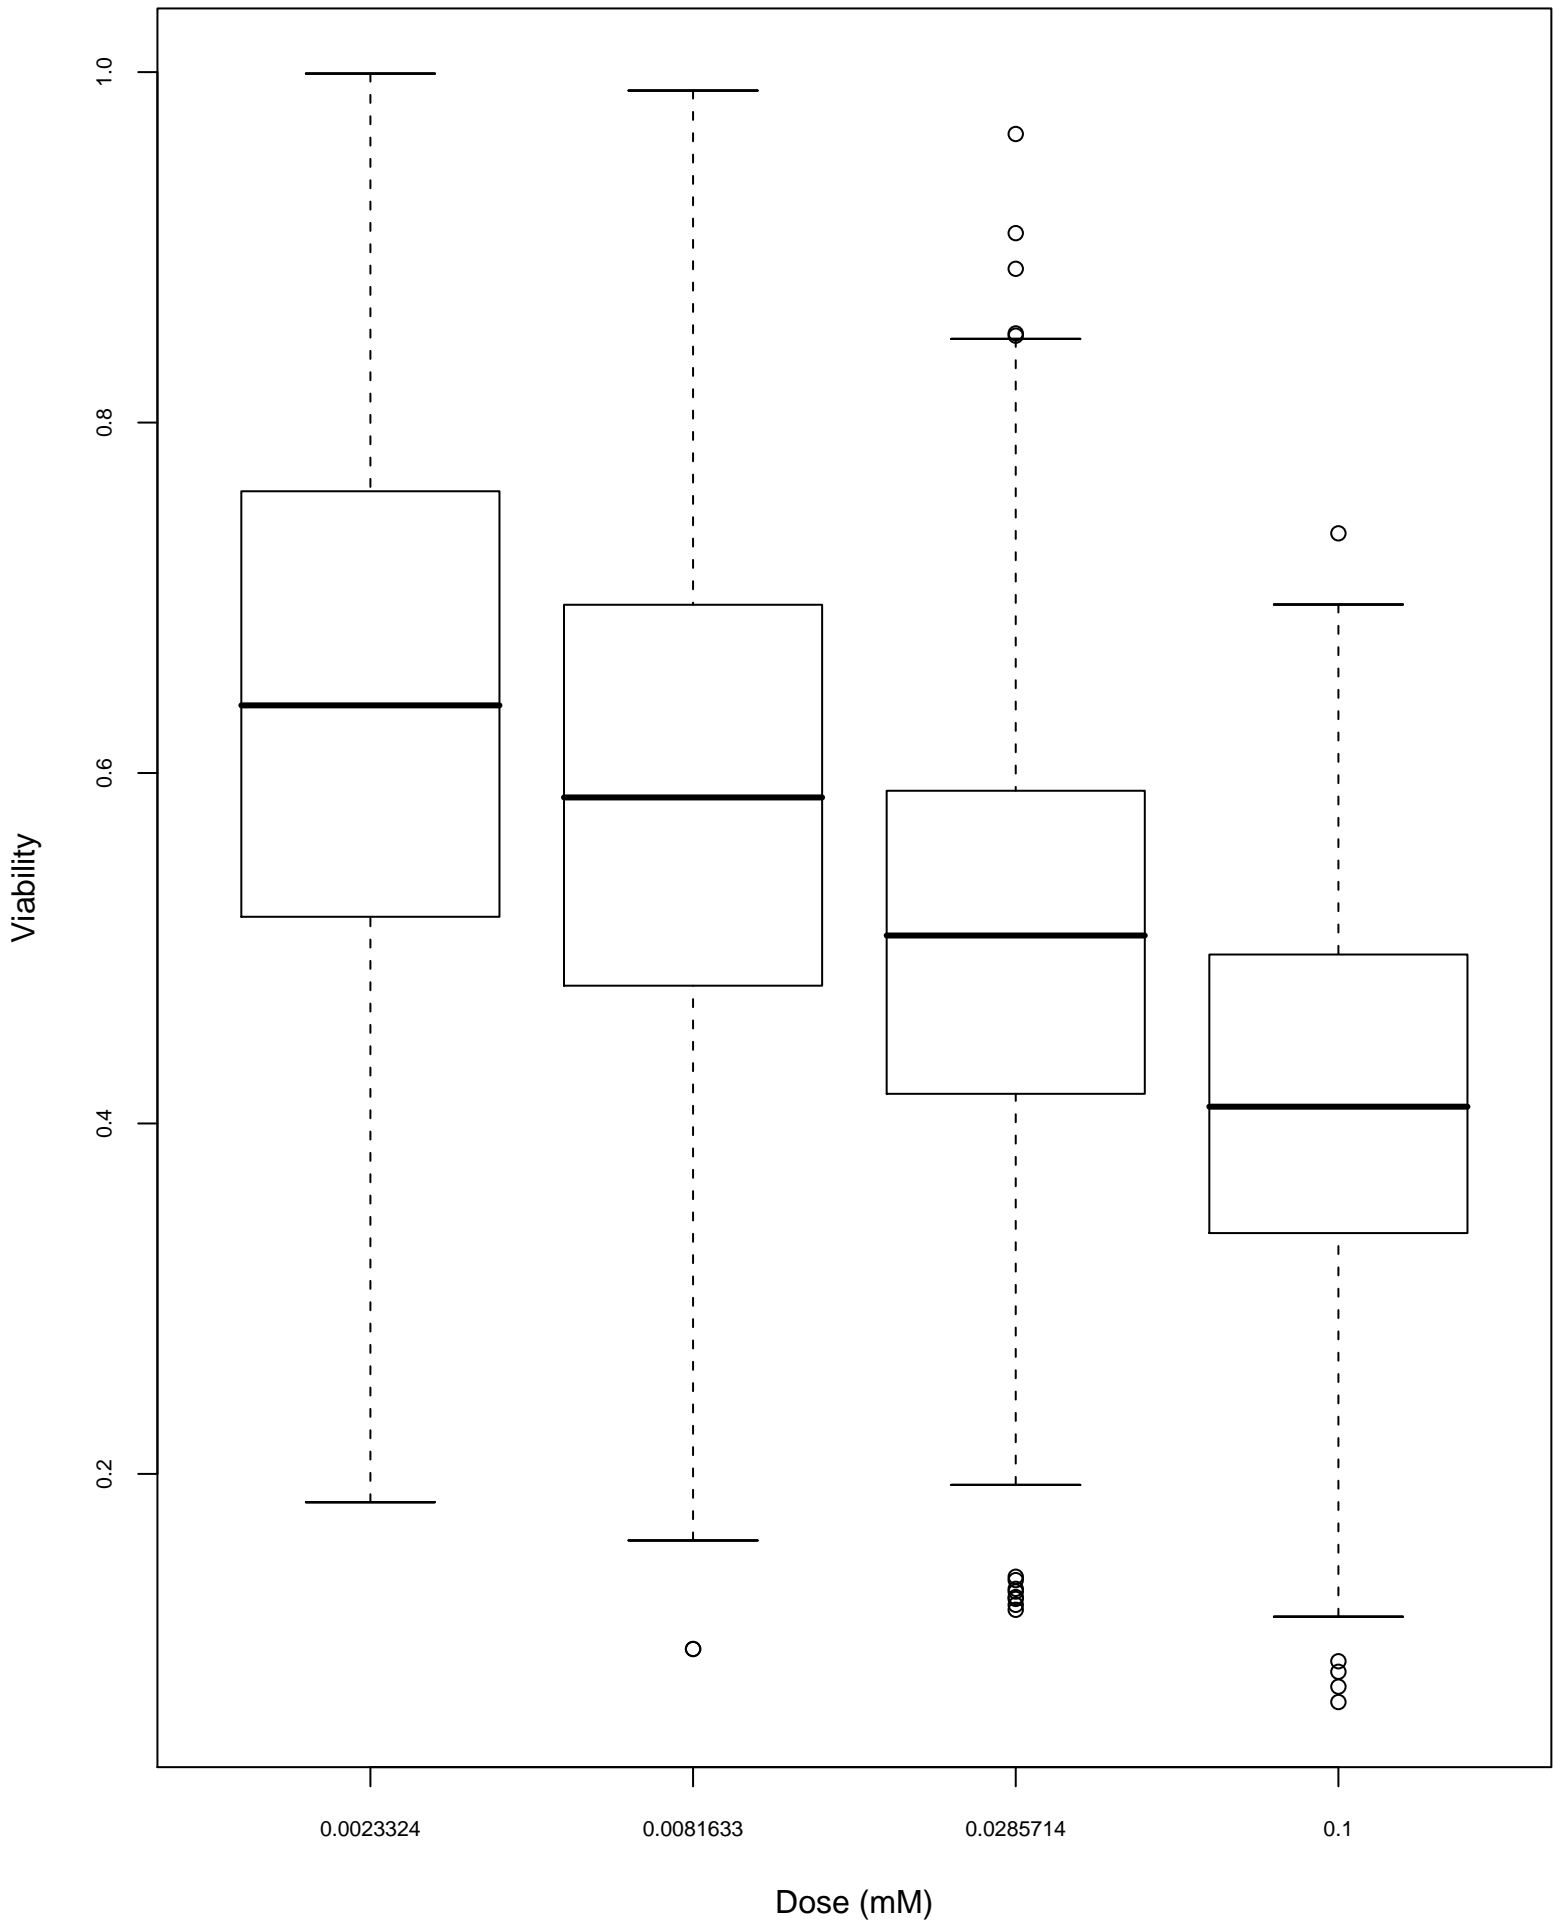

# Drug Flud

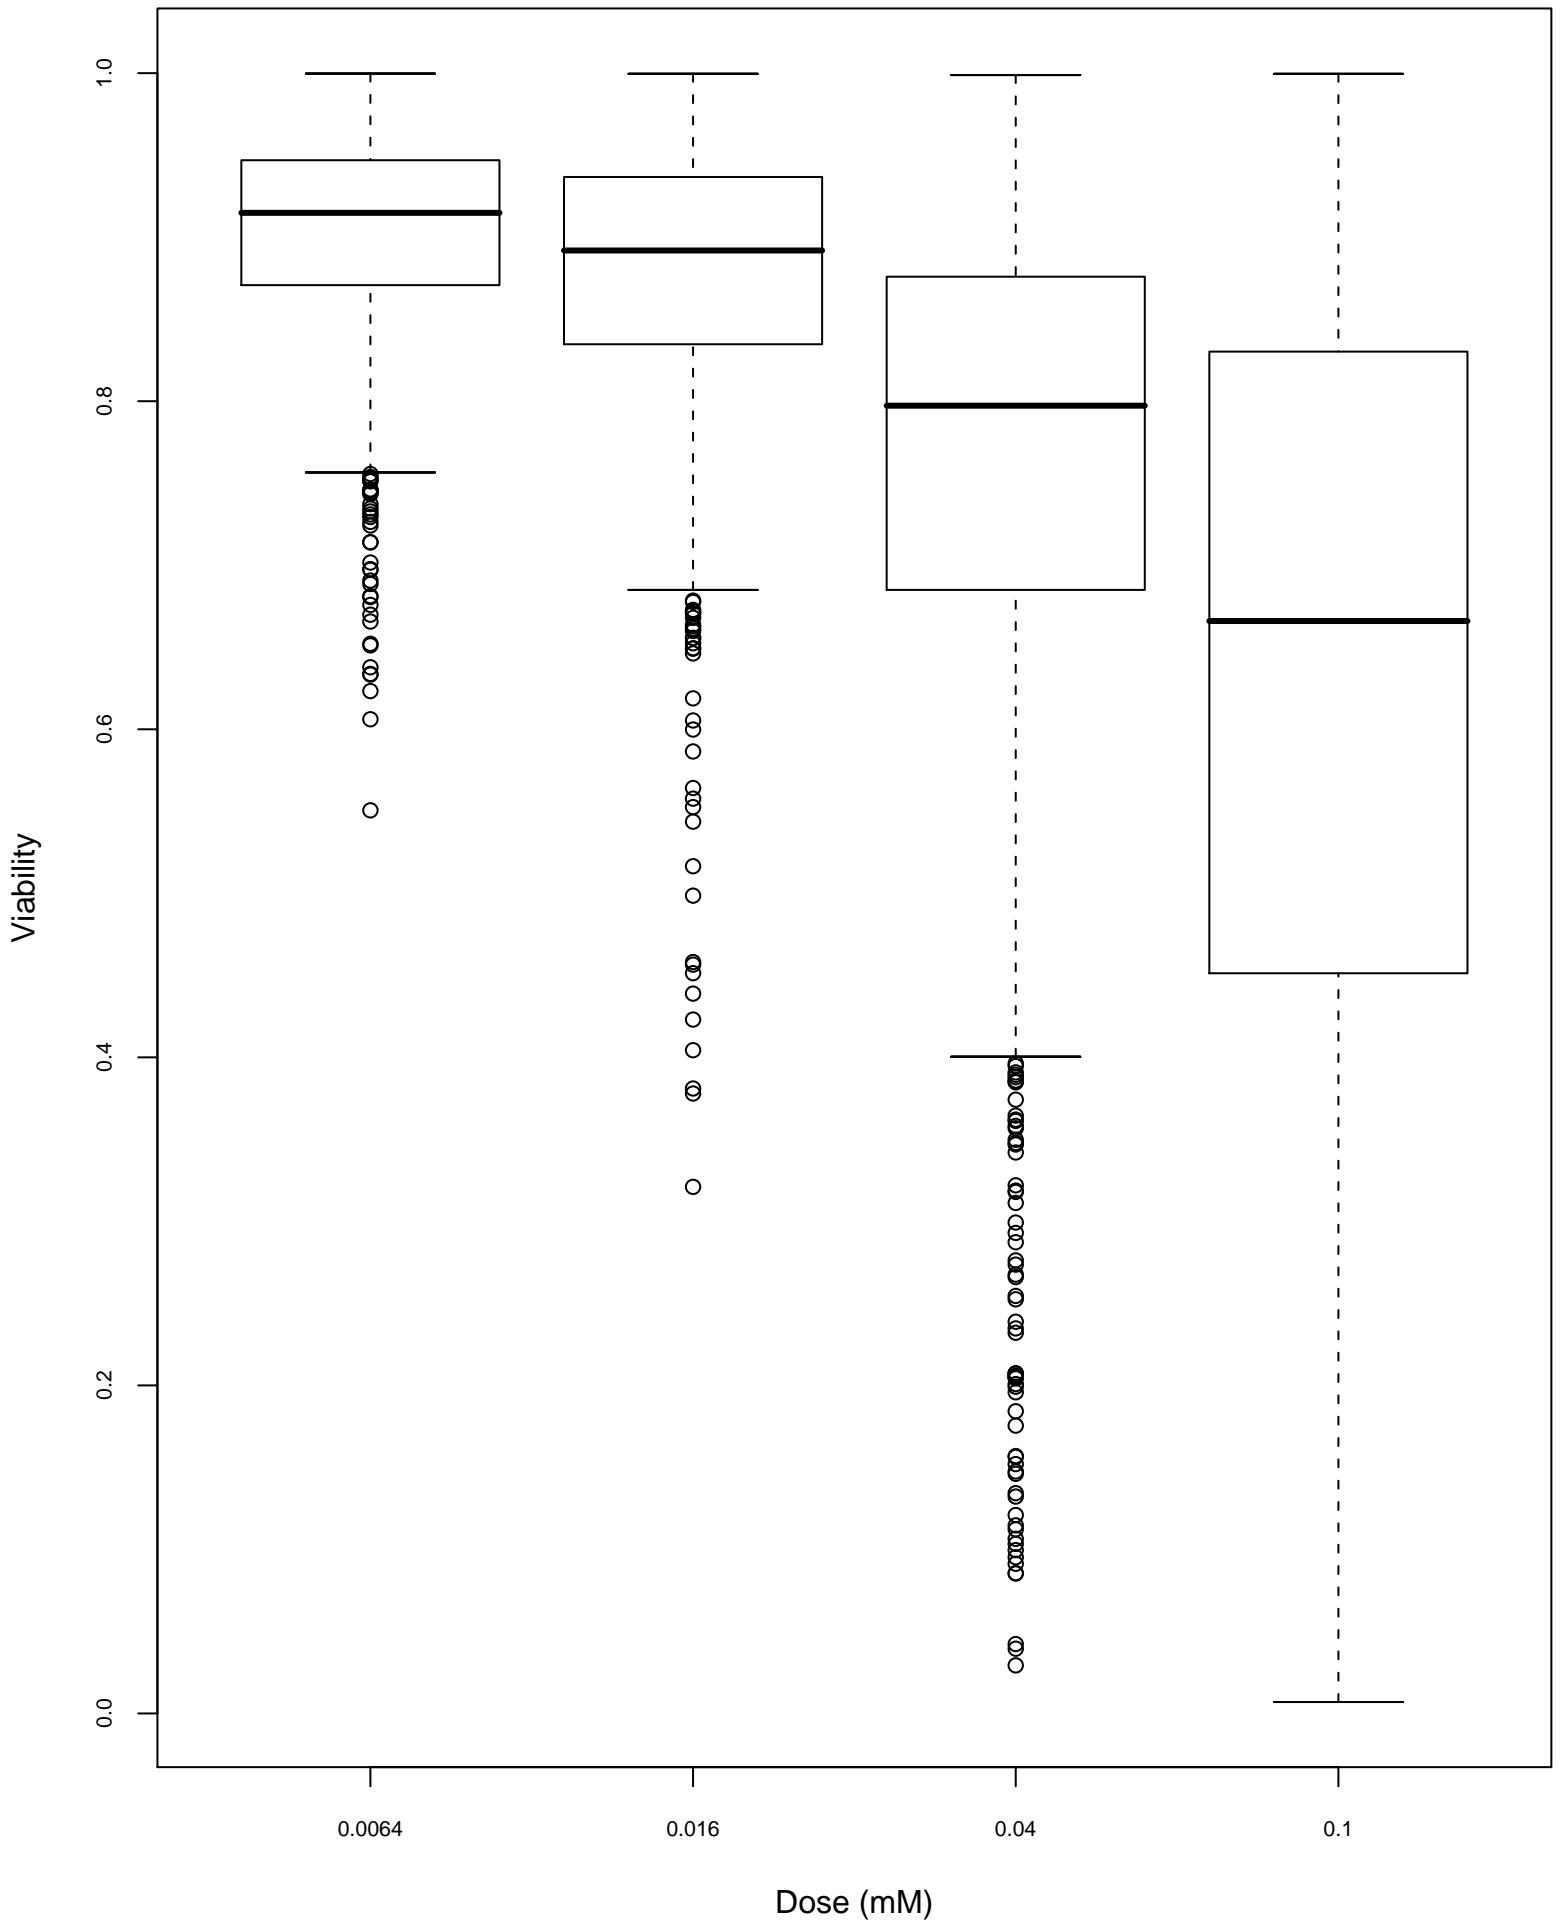

# Drug Gem

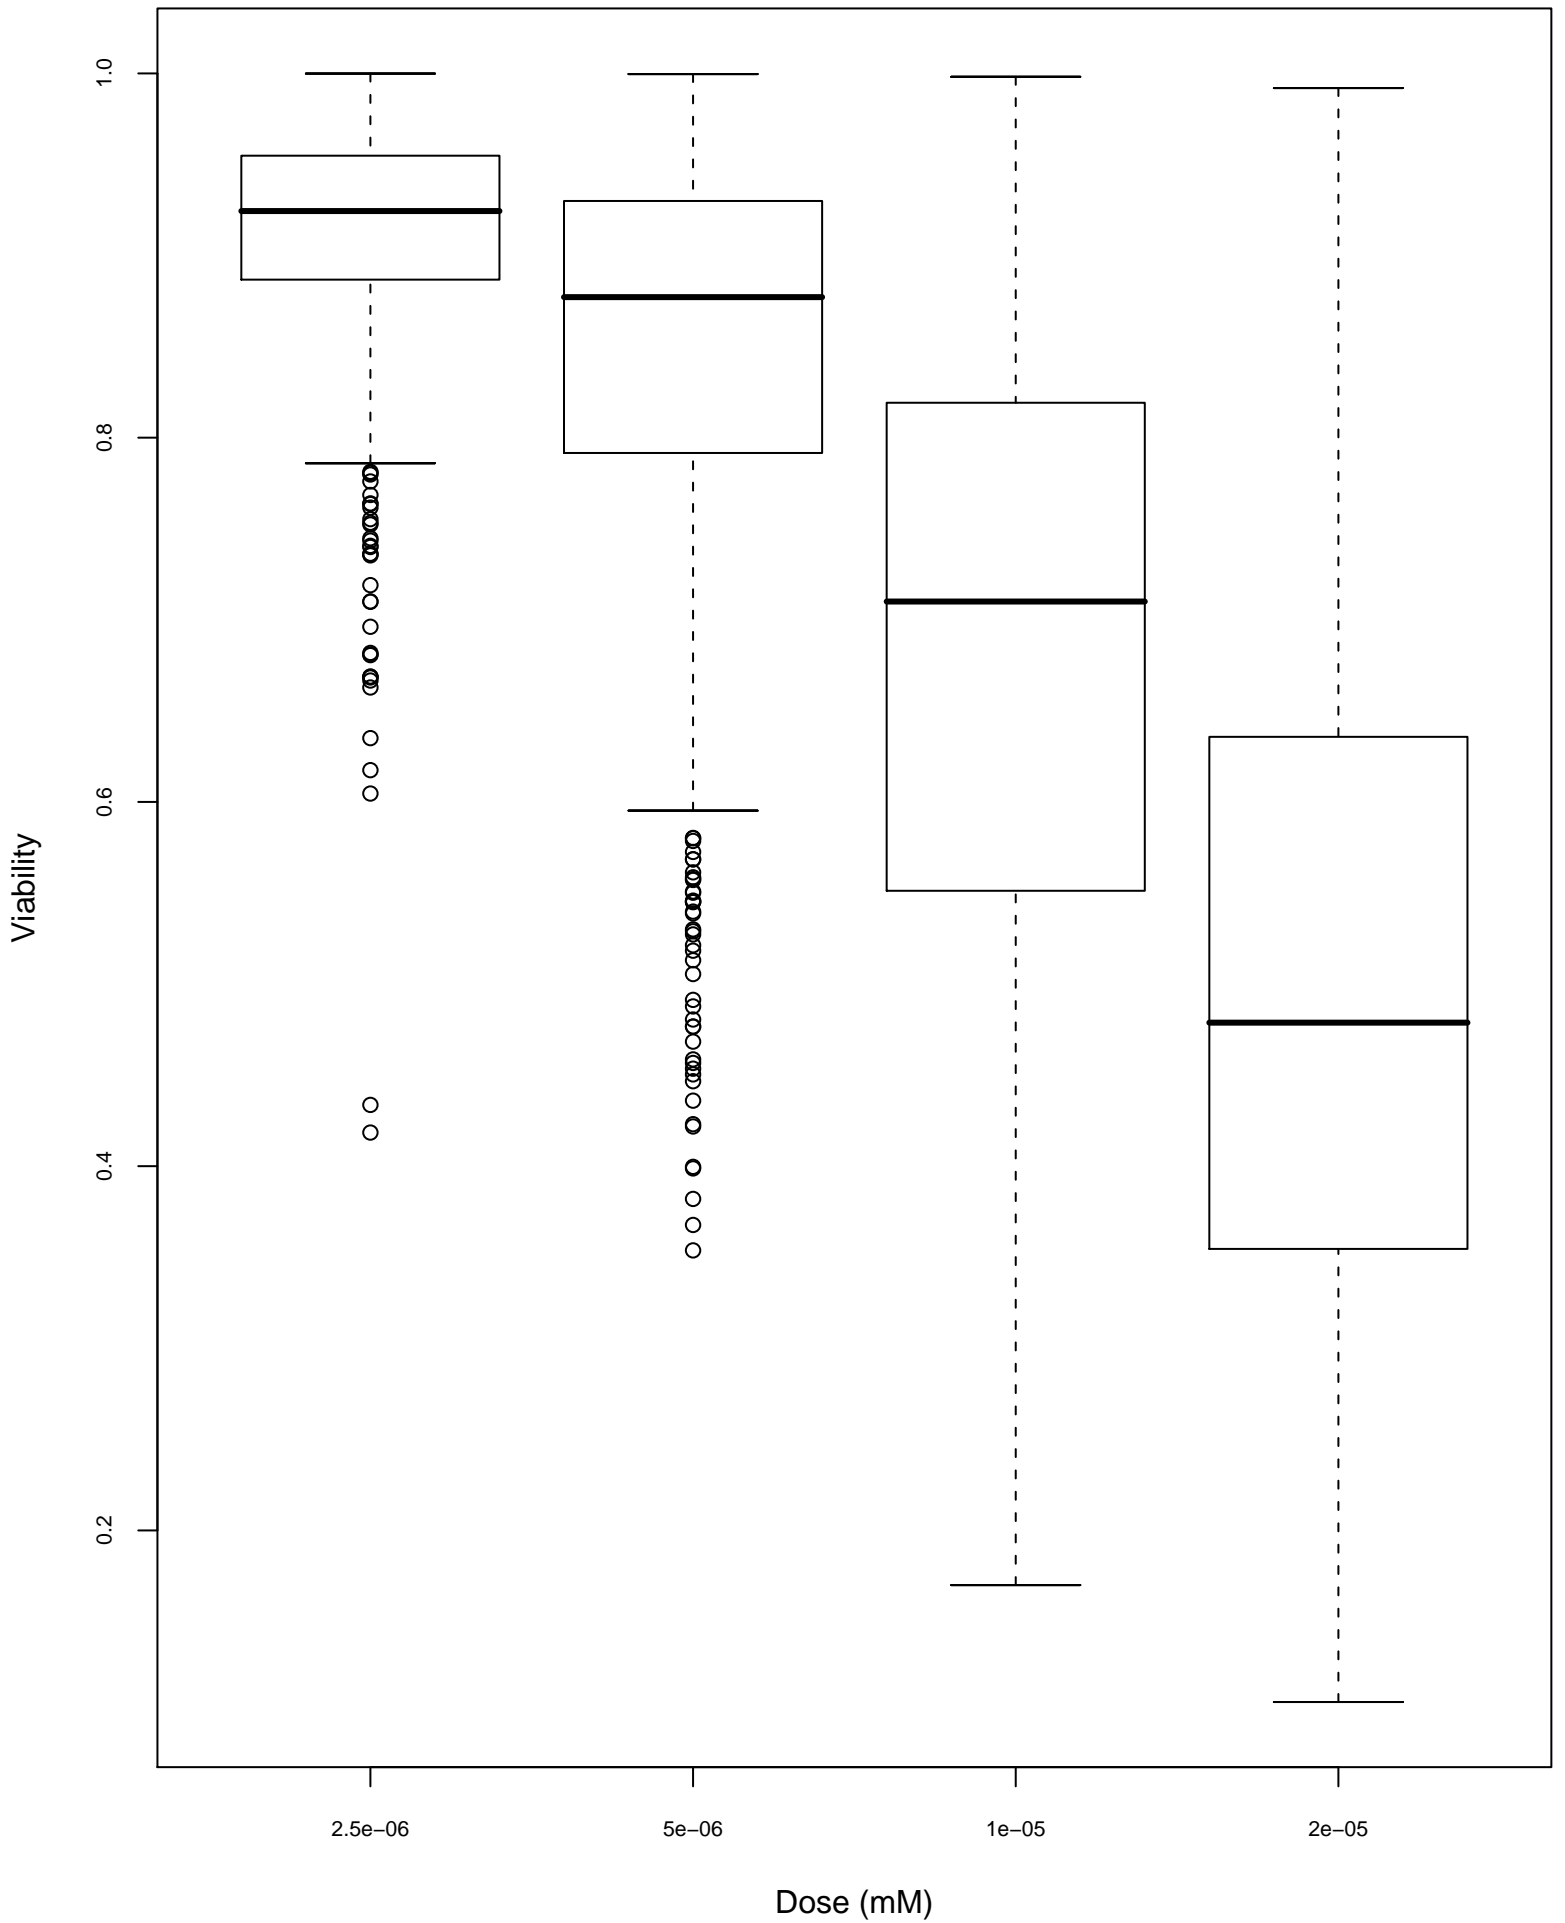



# Drug Hydrox

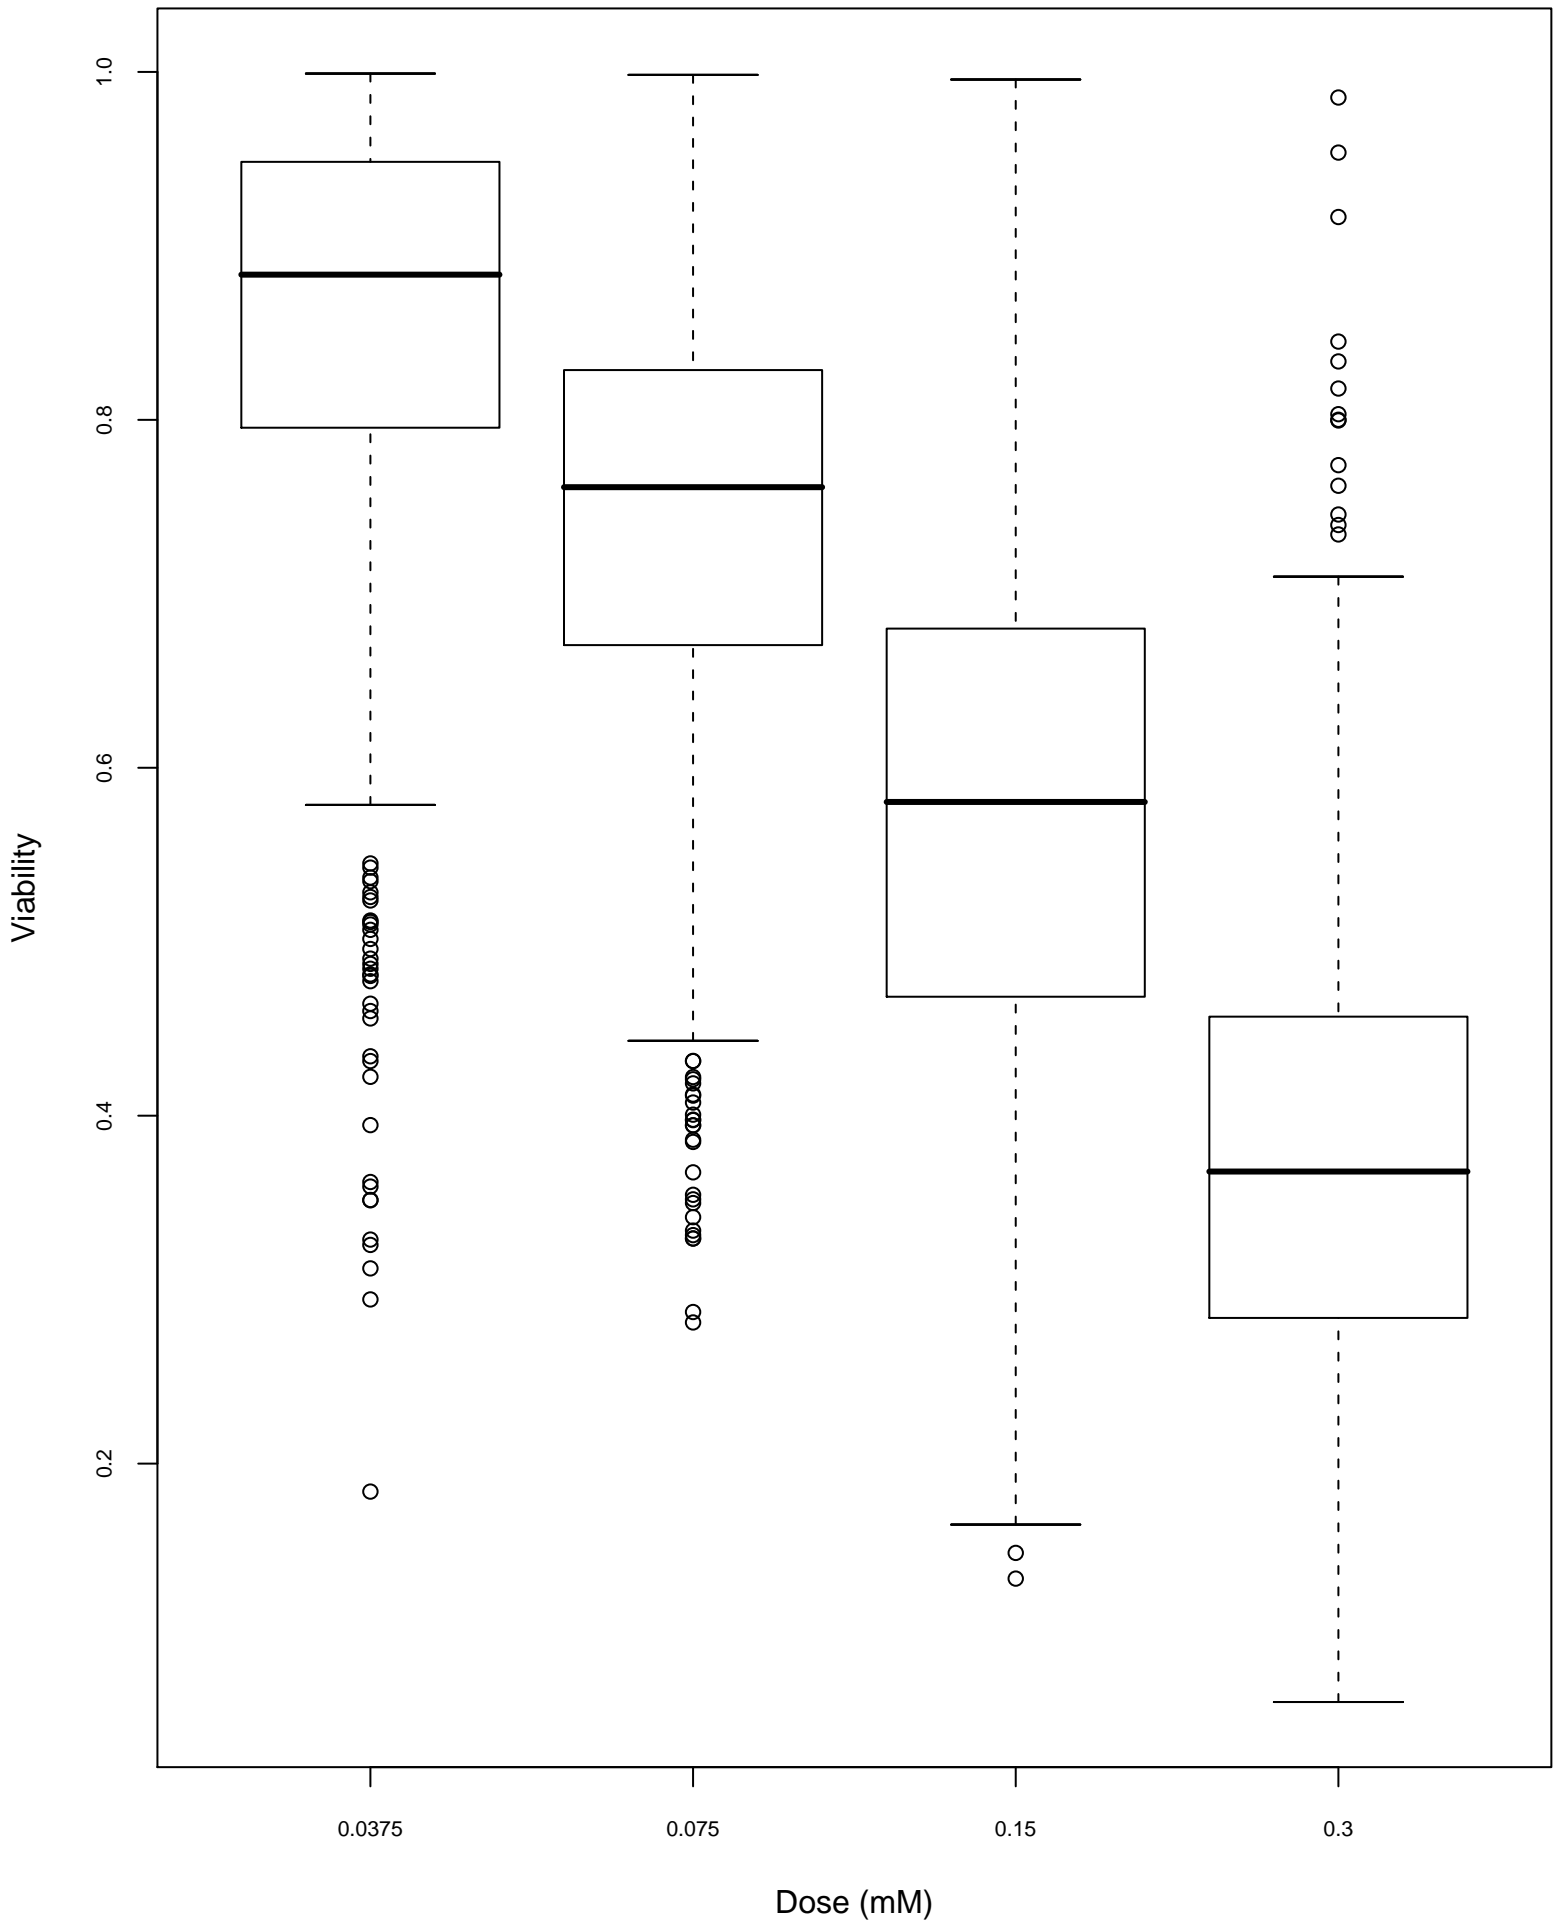

# Drug Ida

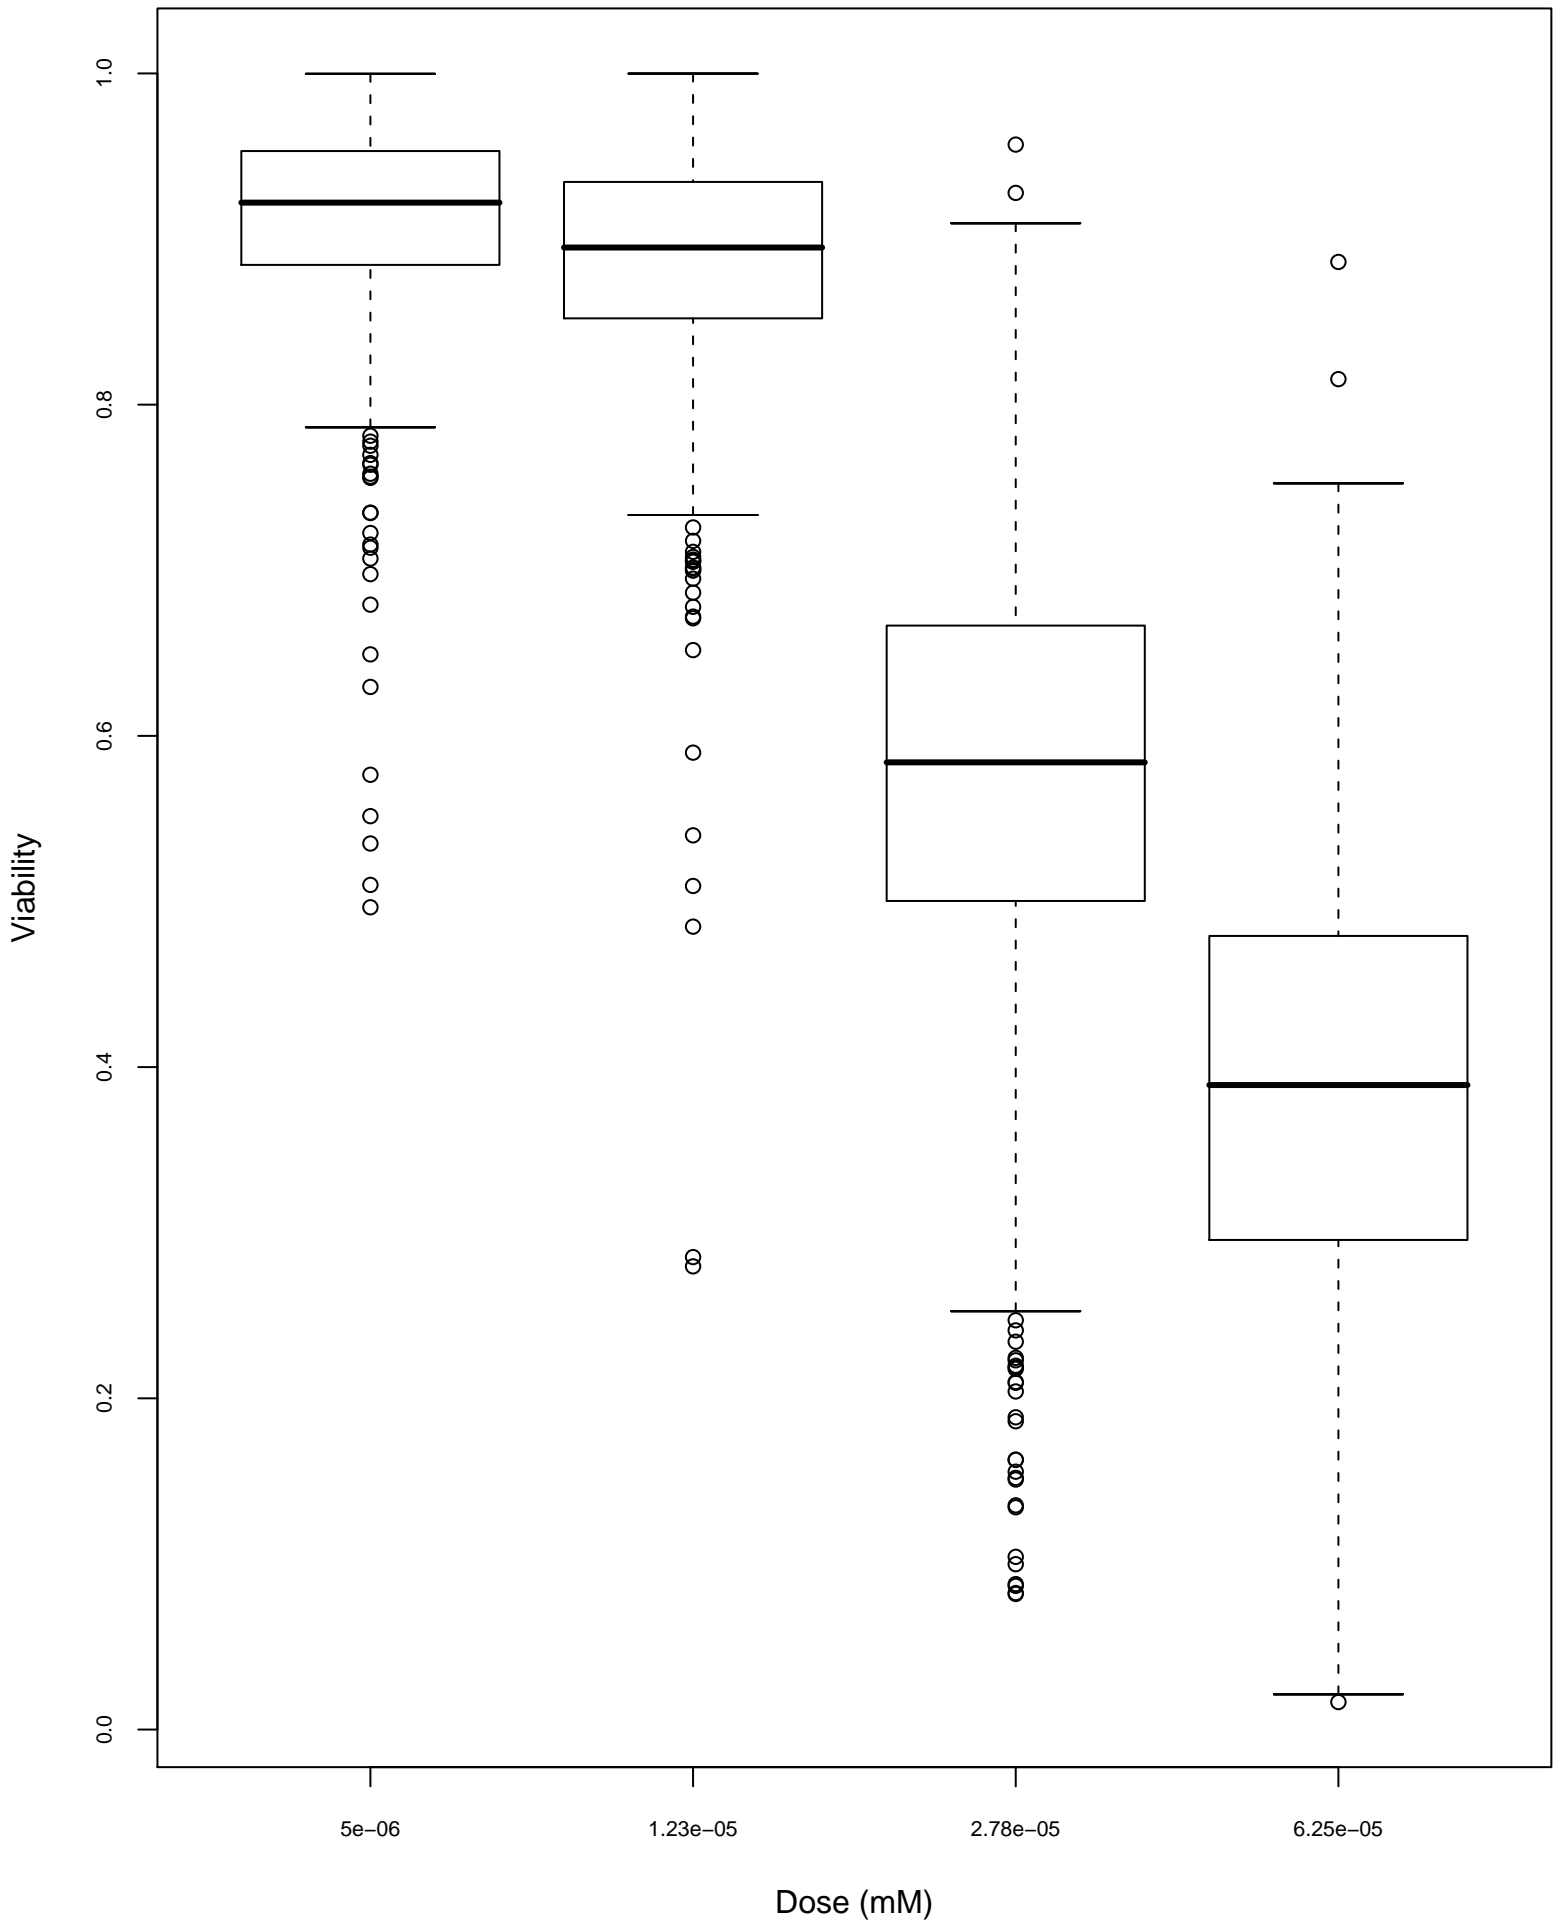

# Drug Mitom

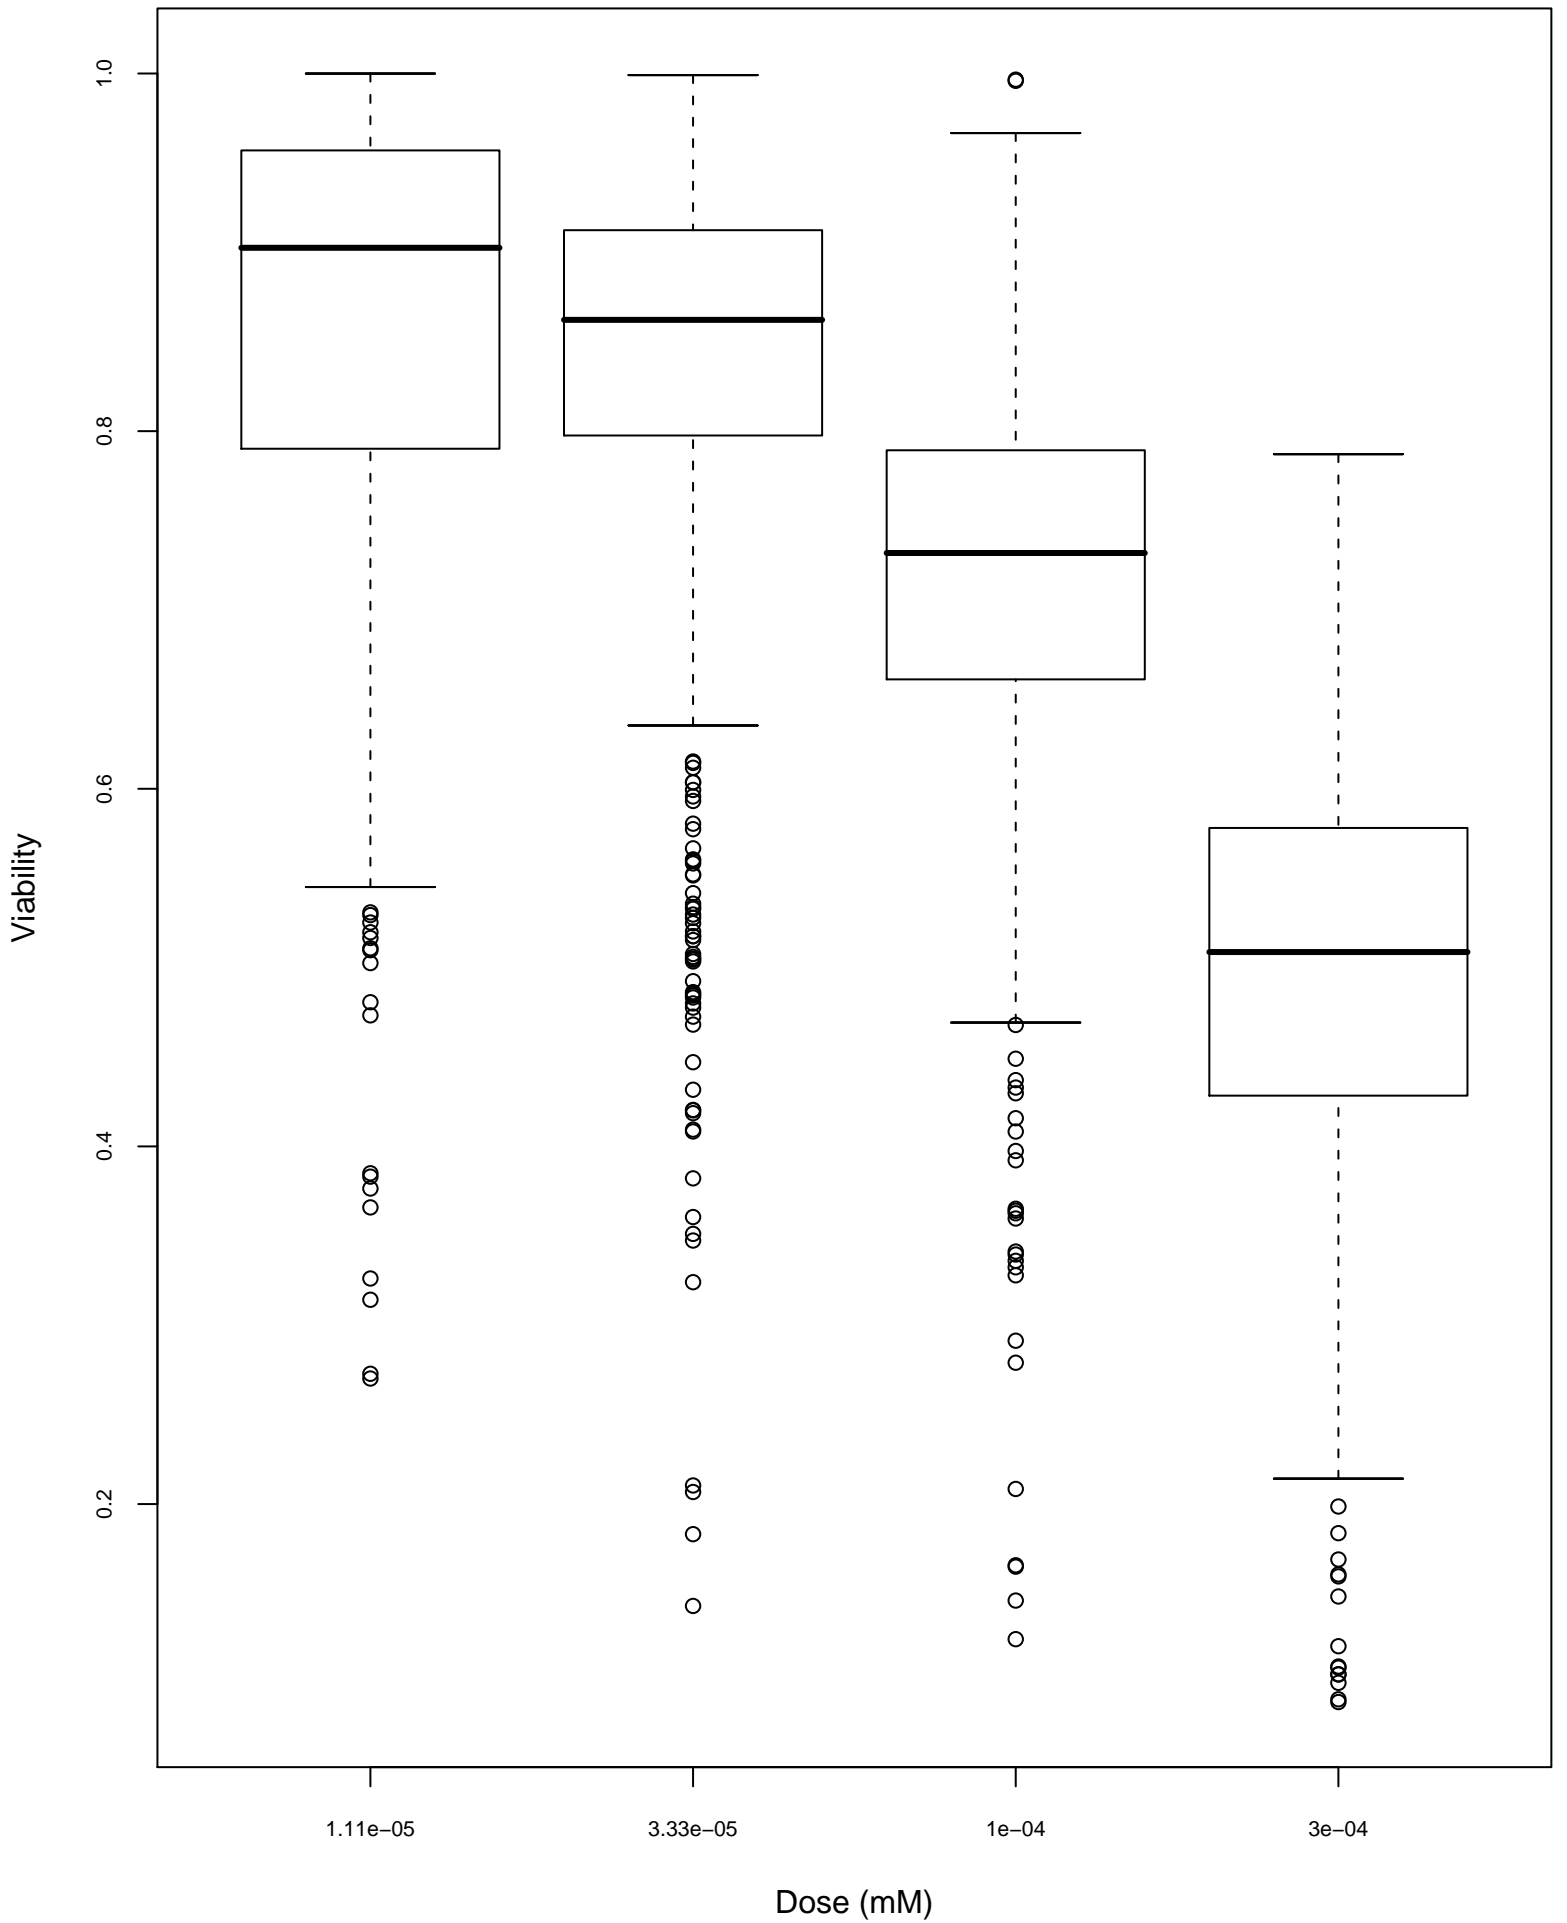

# Drug Mitox

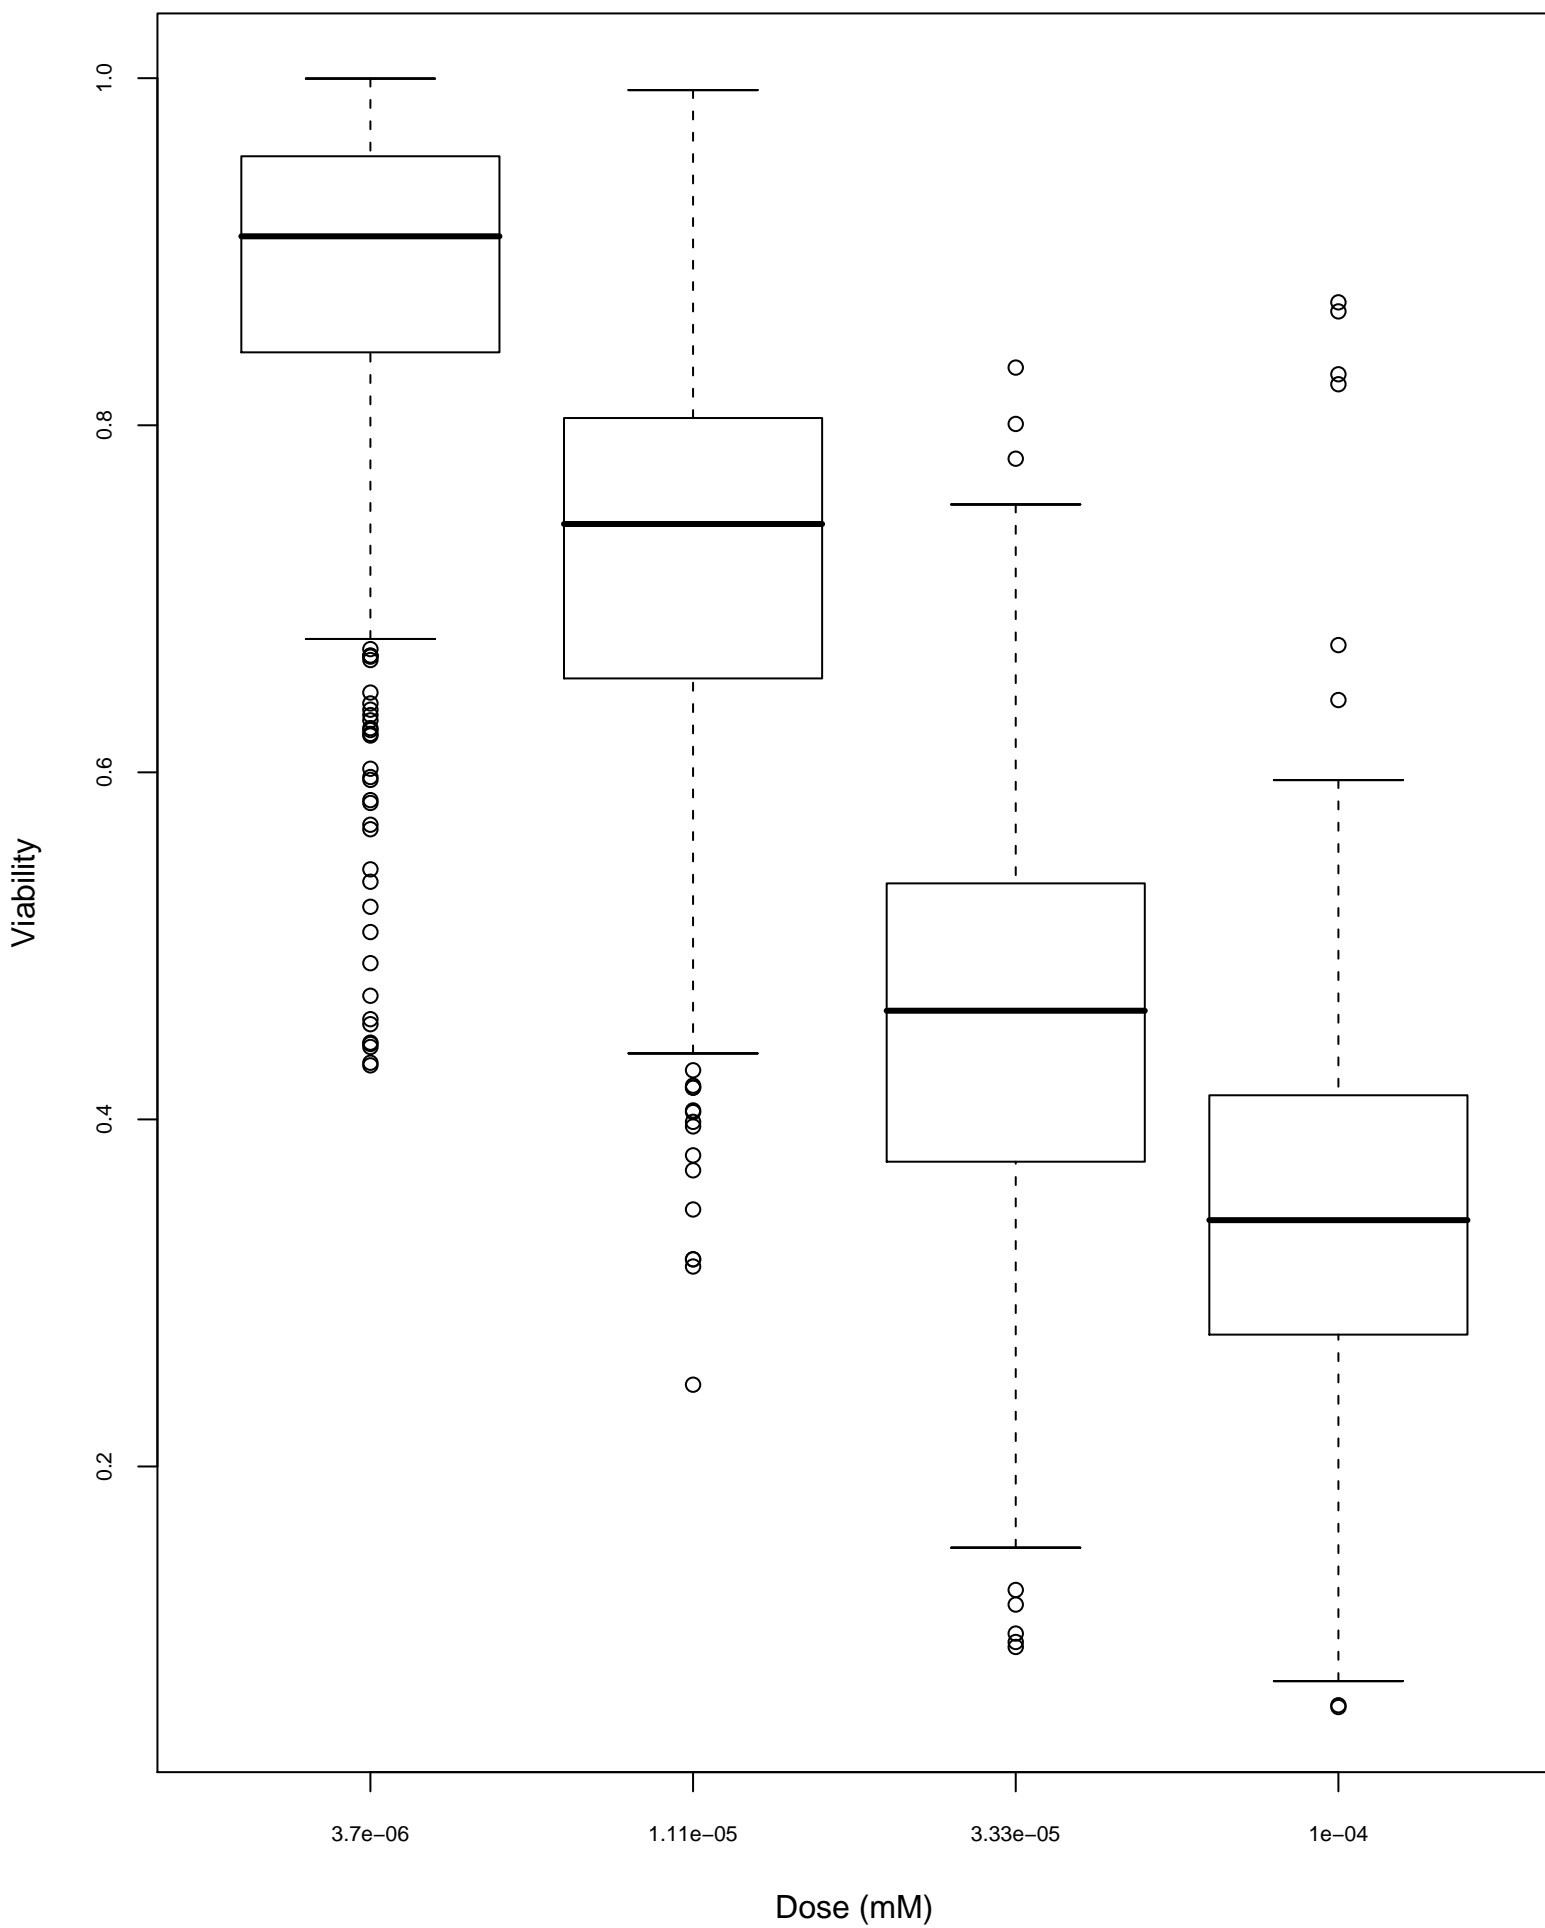

# Drug Oxal

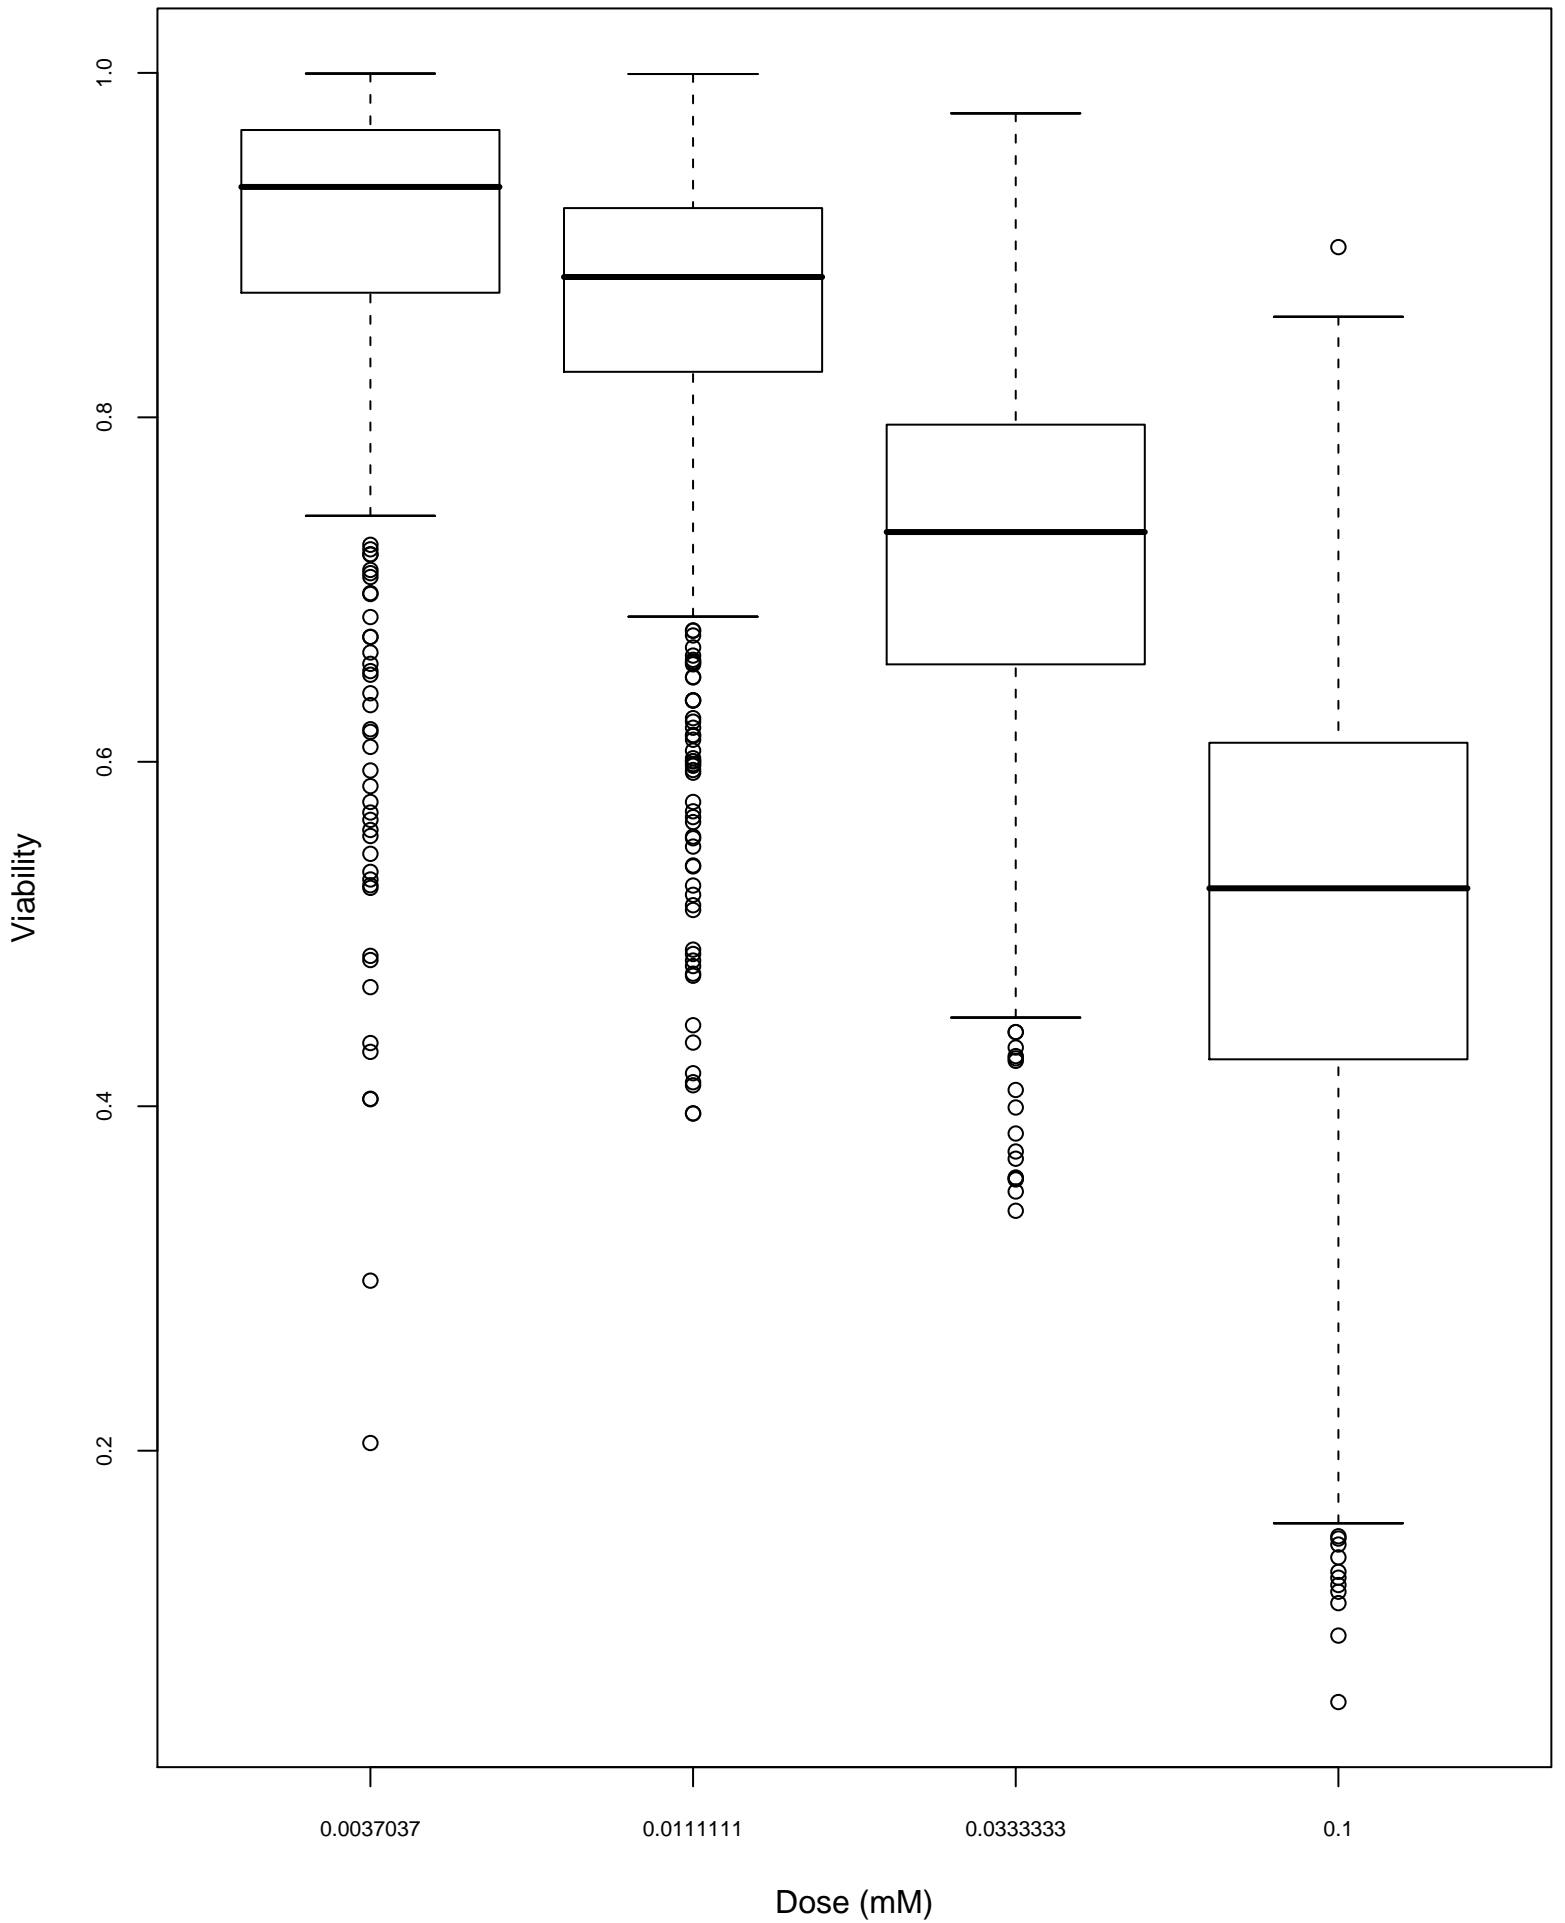

# Drug Pac

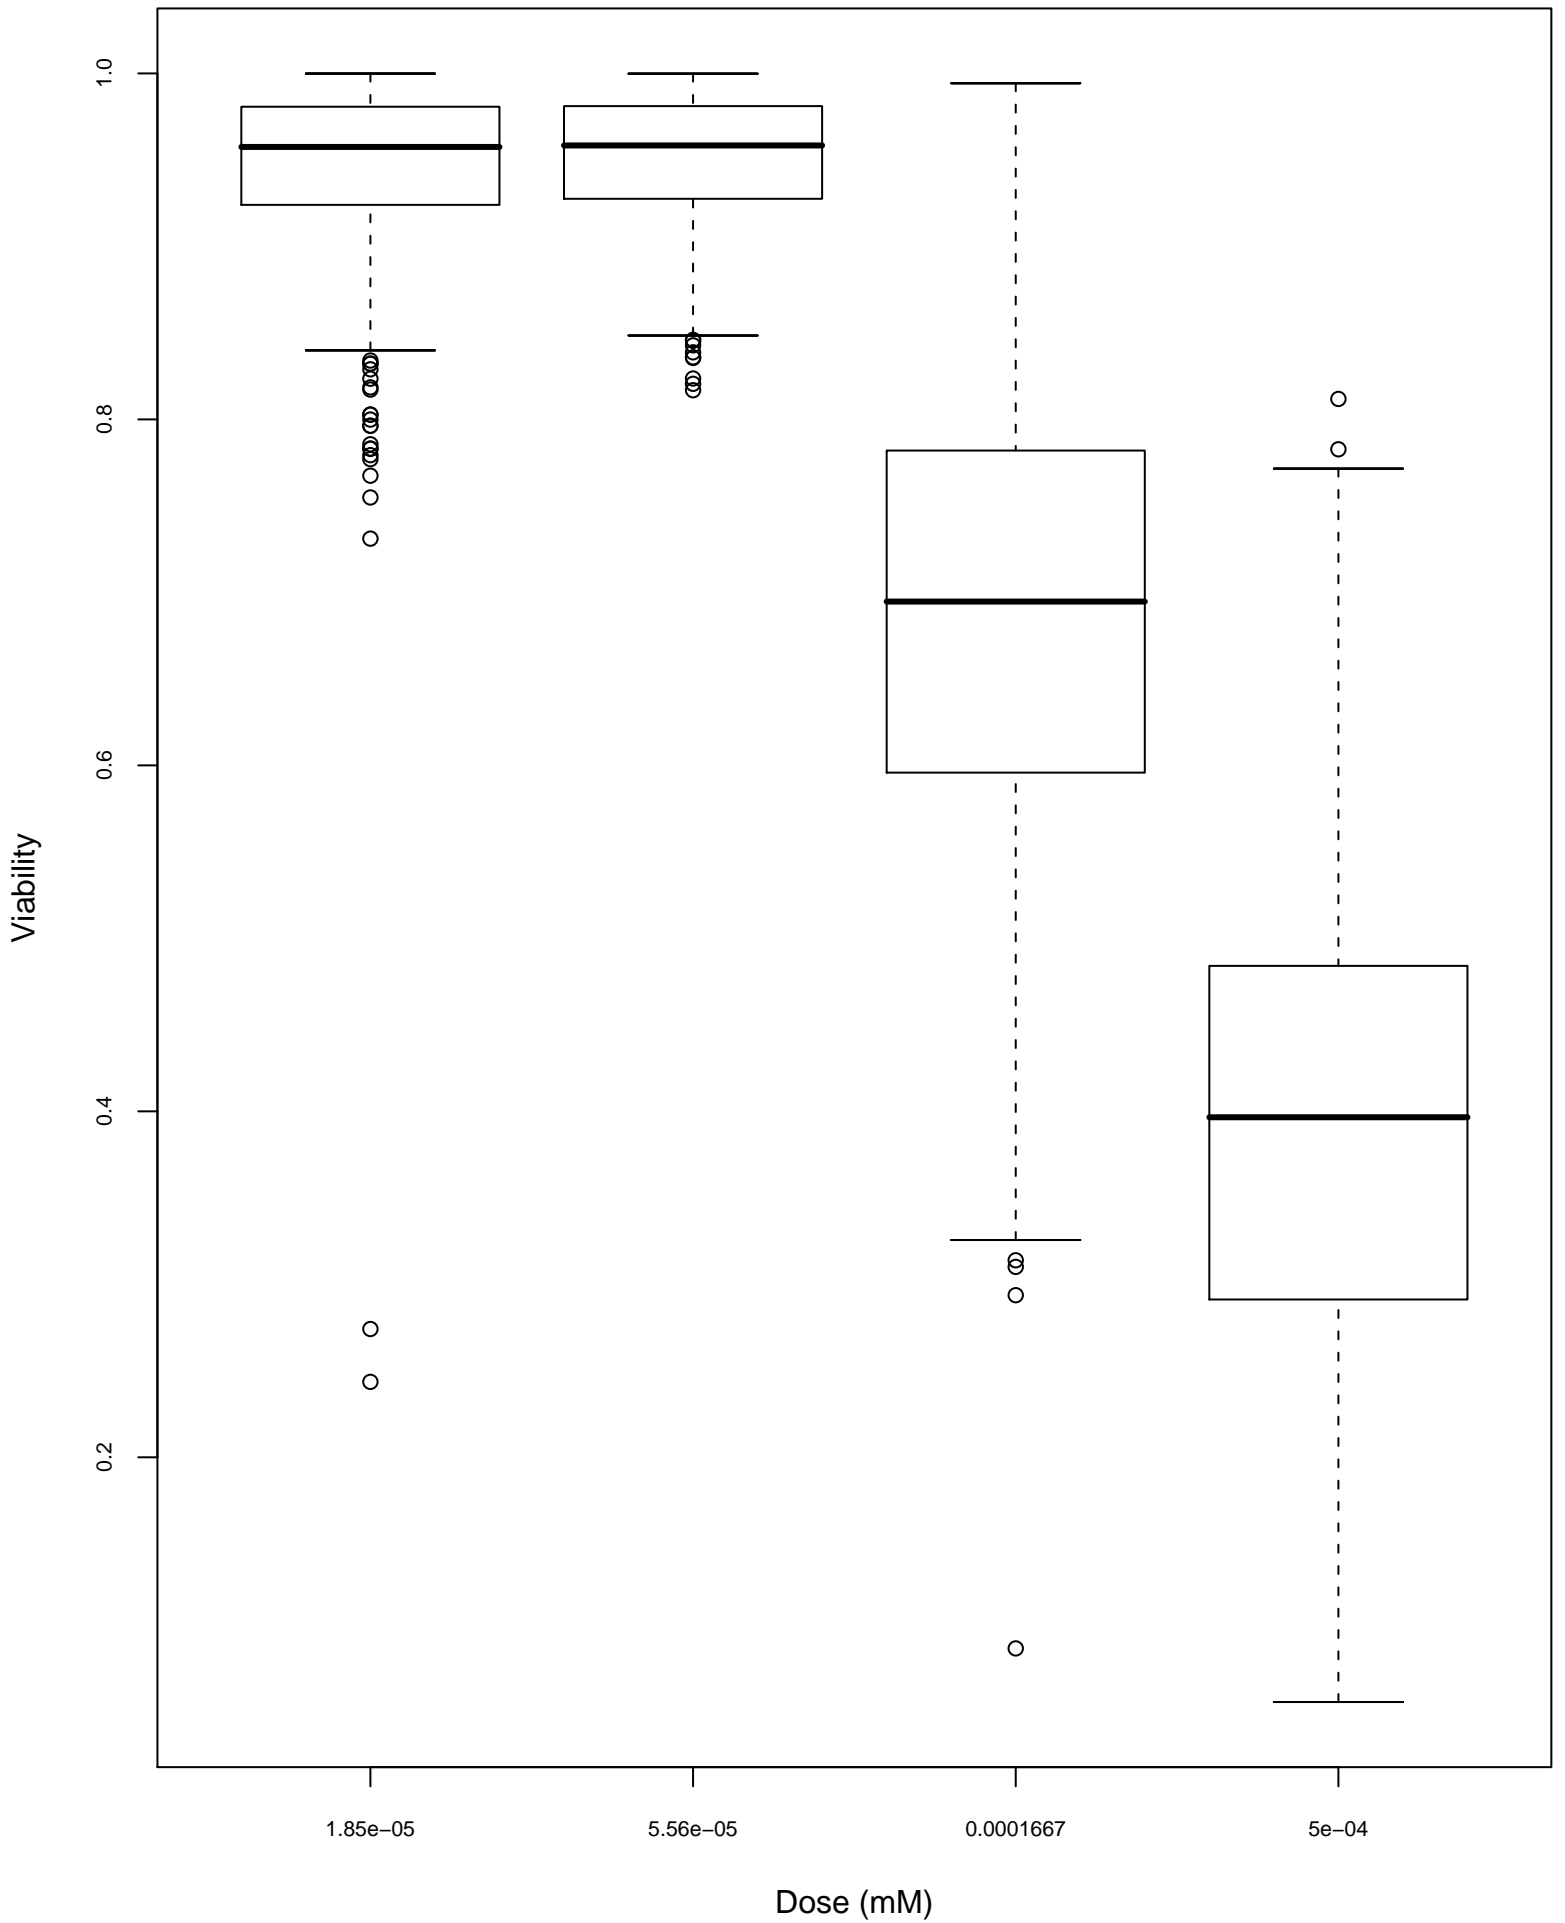

# Drug Rapa

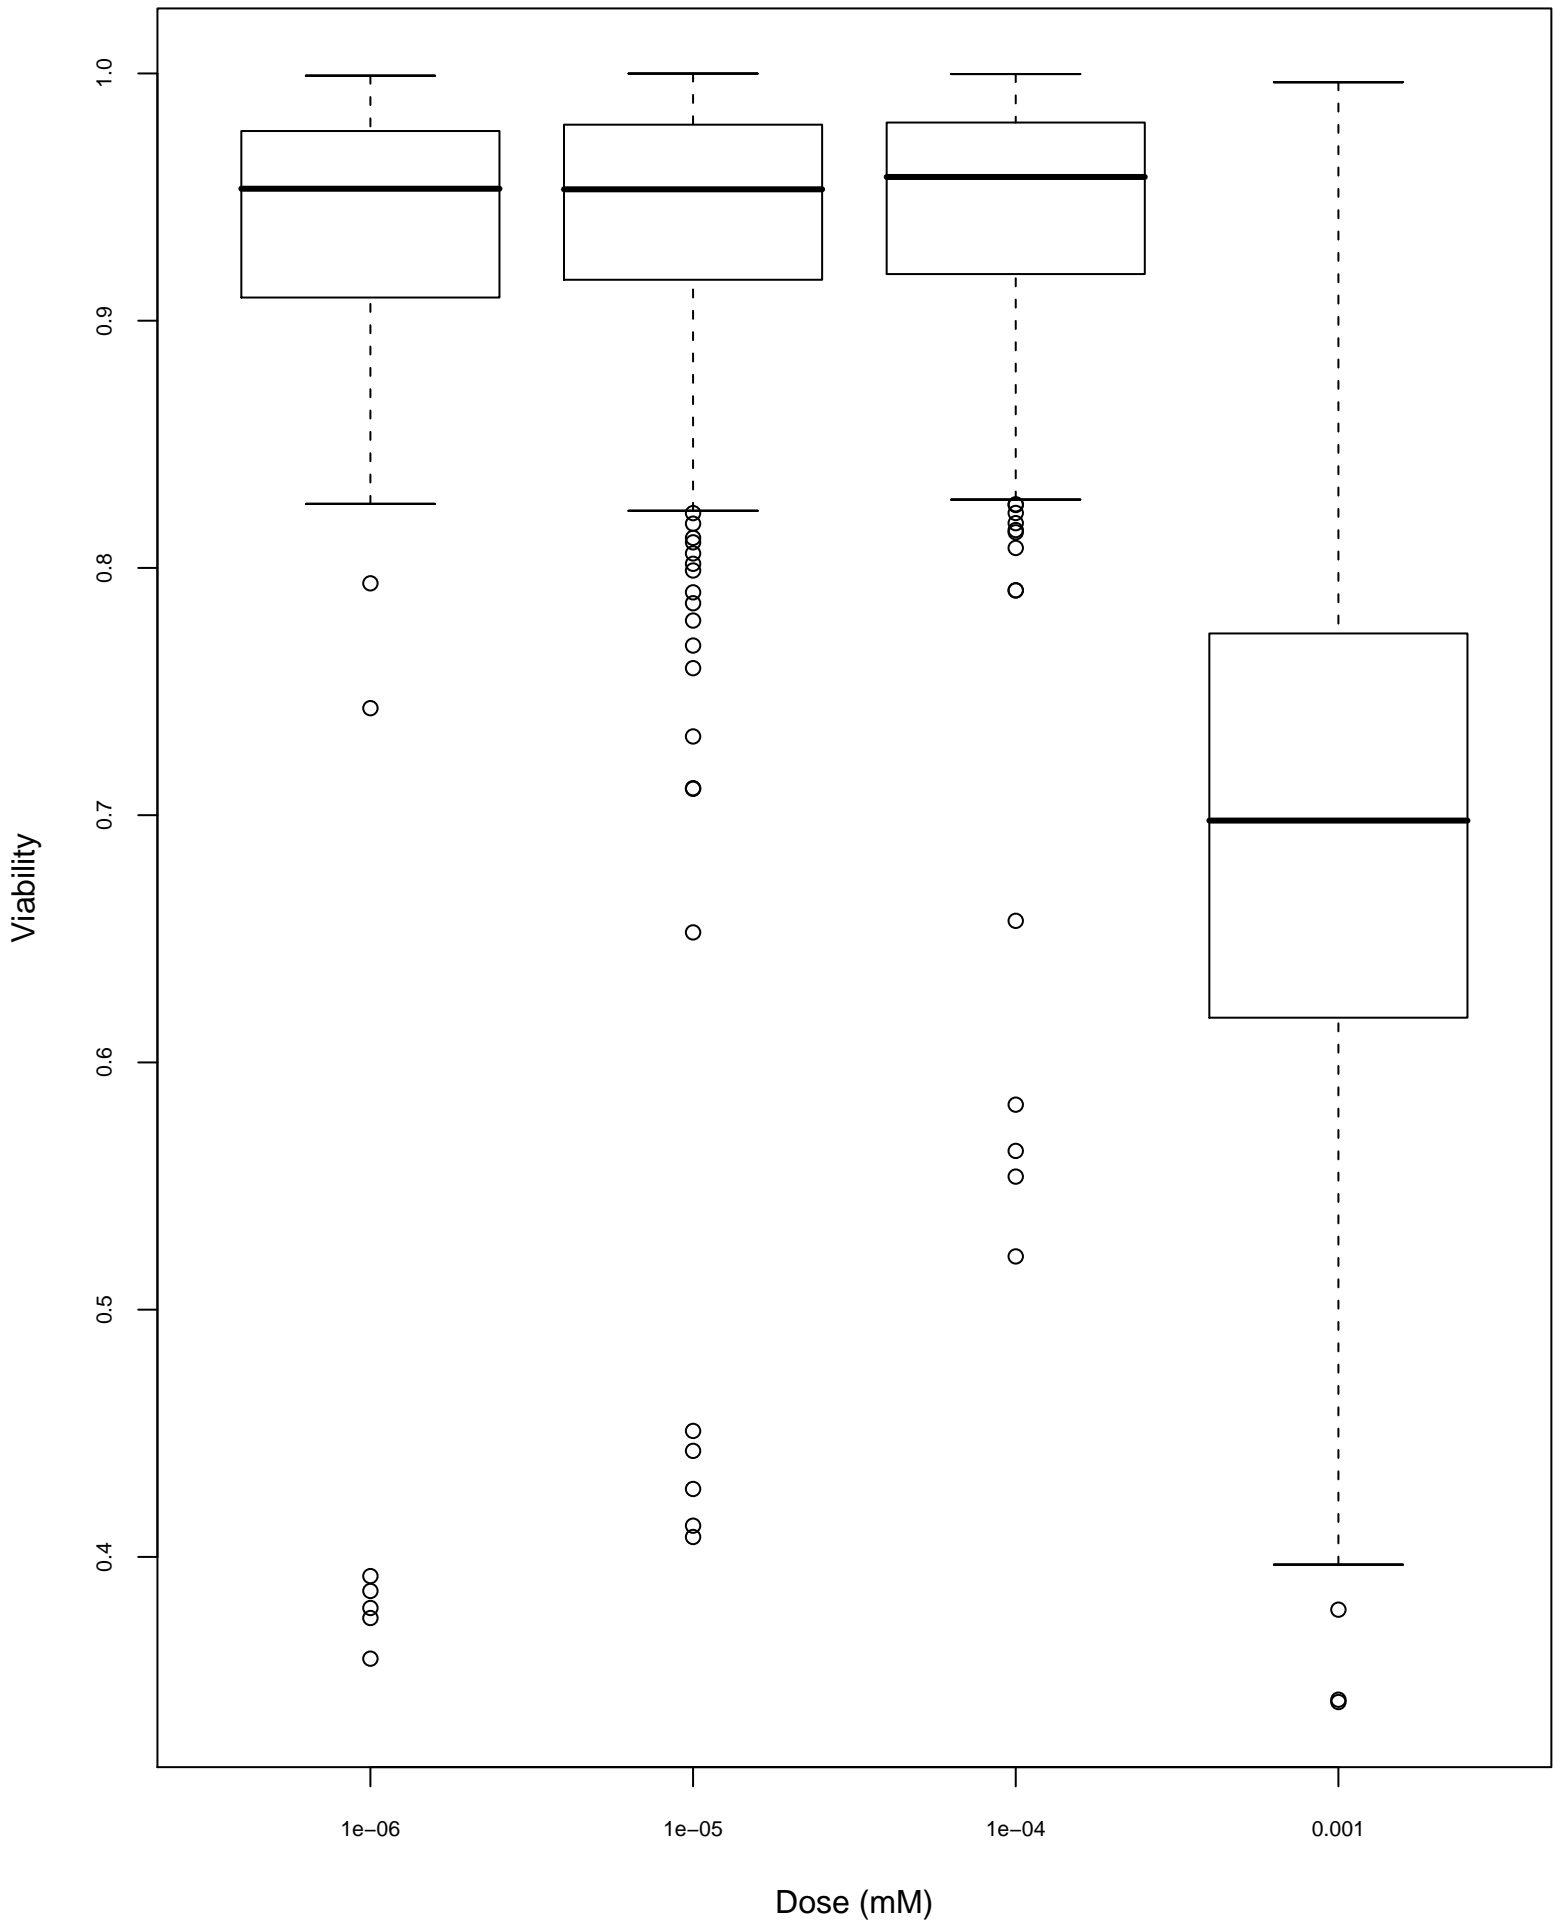

# Drug Temo

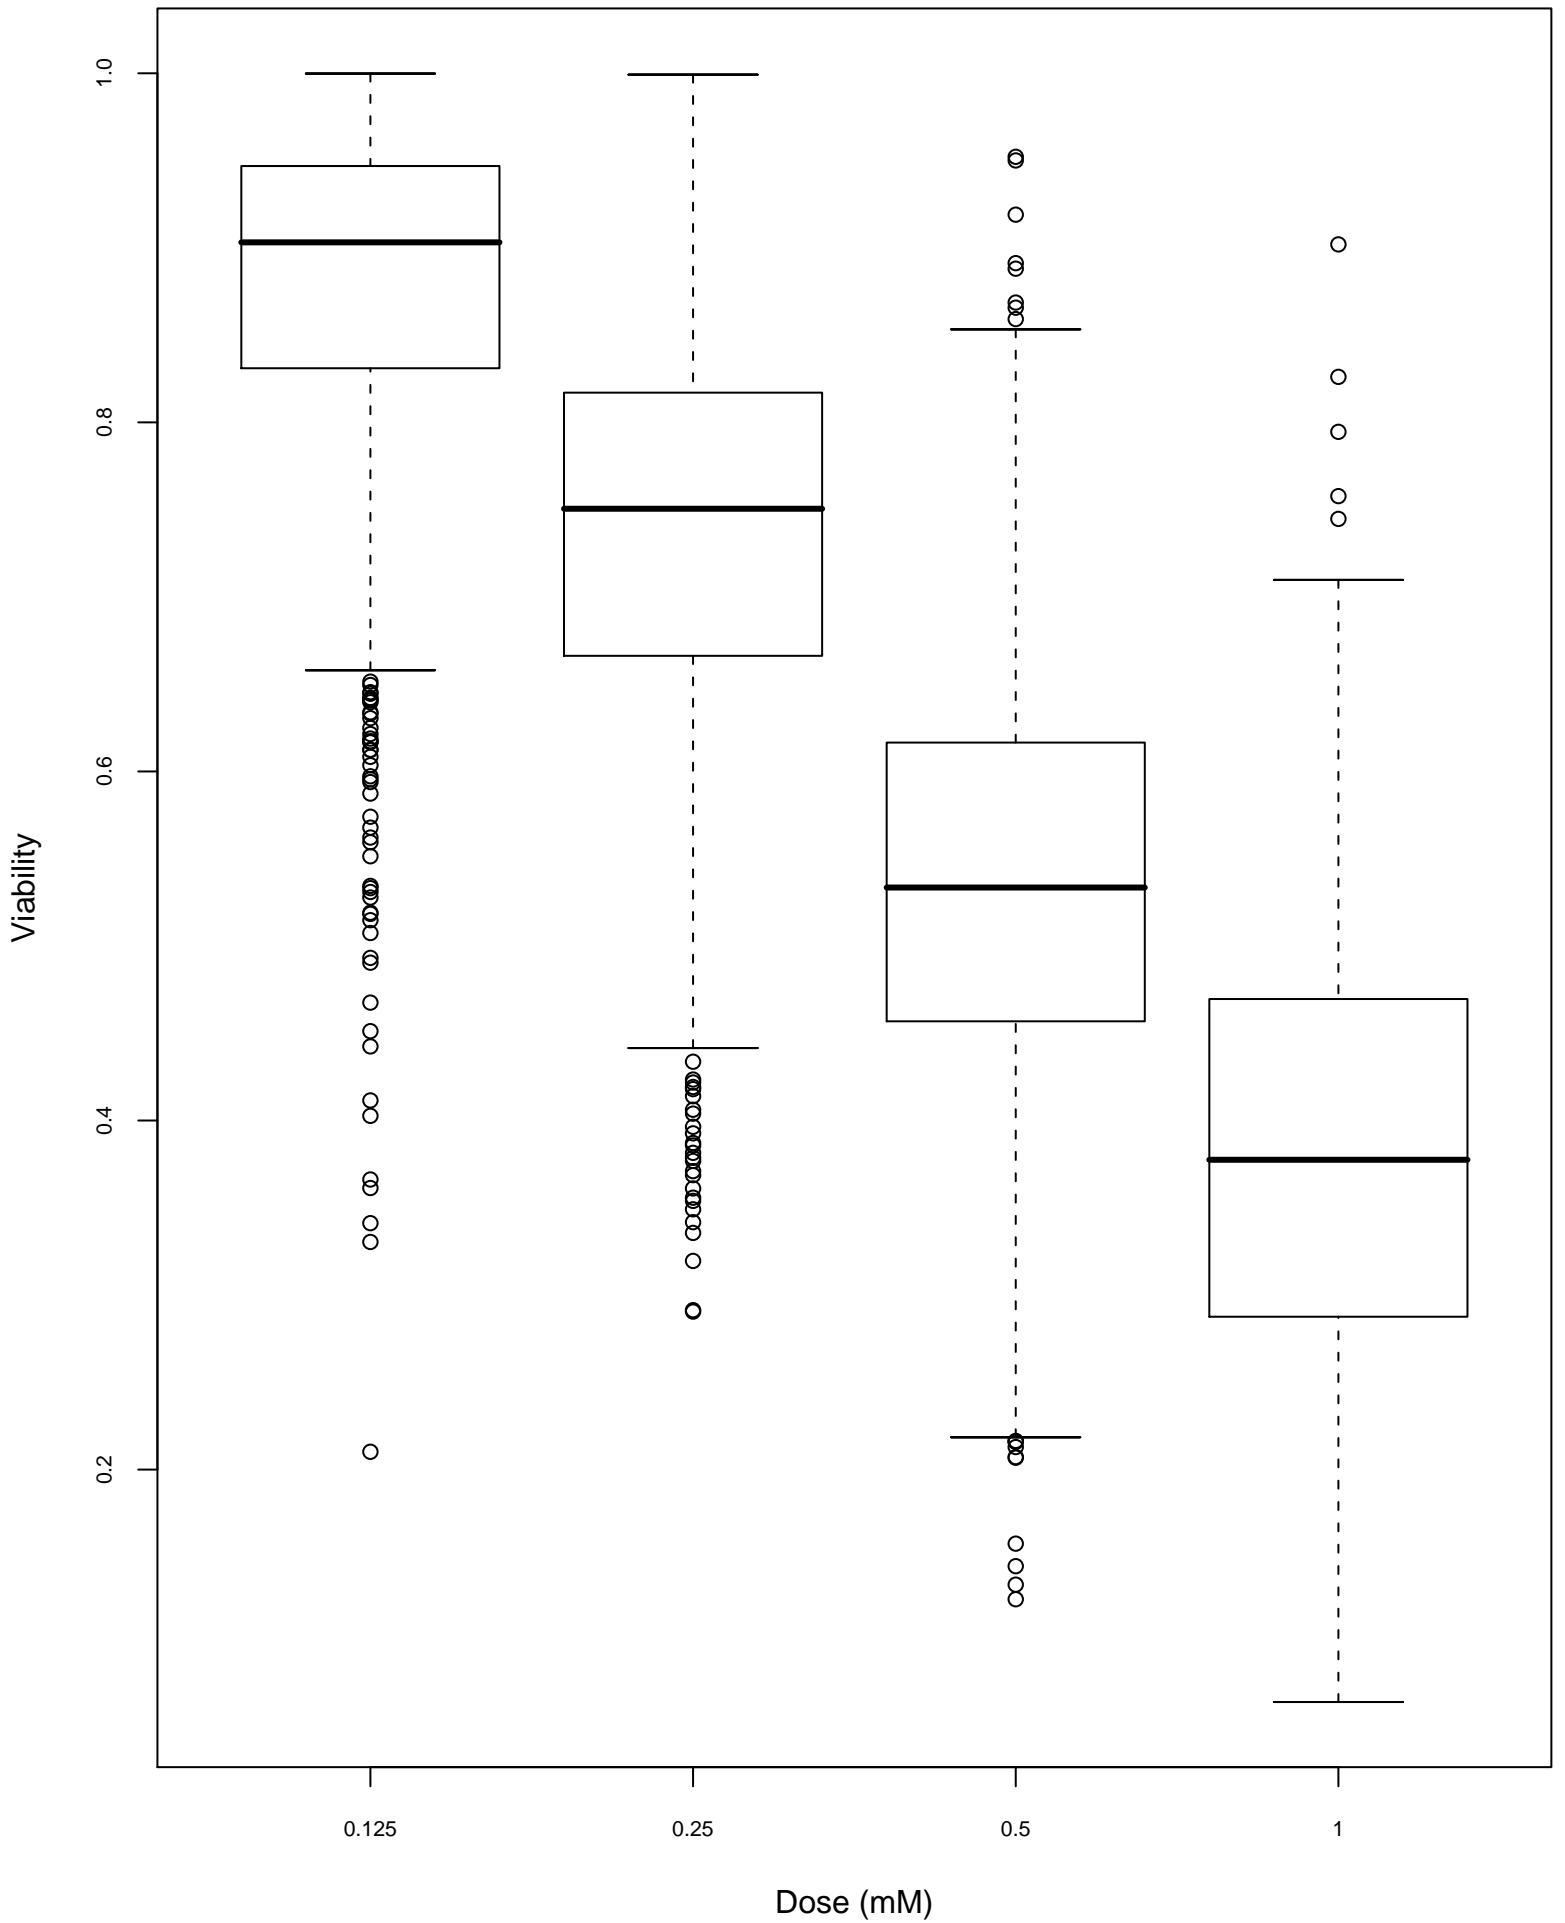



# Drug Teni

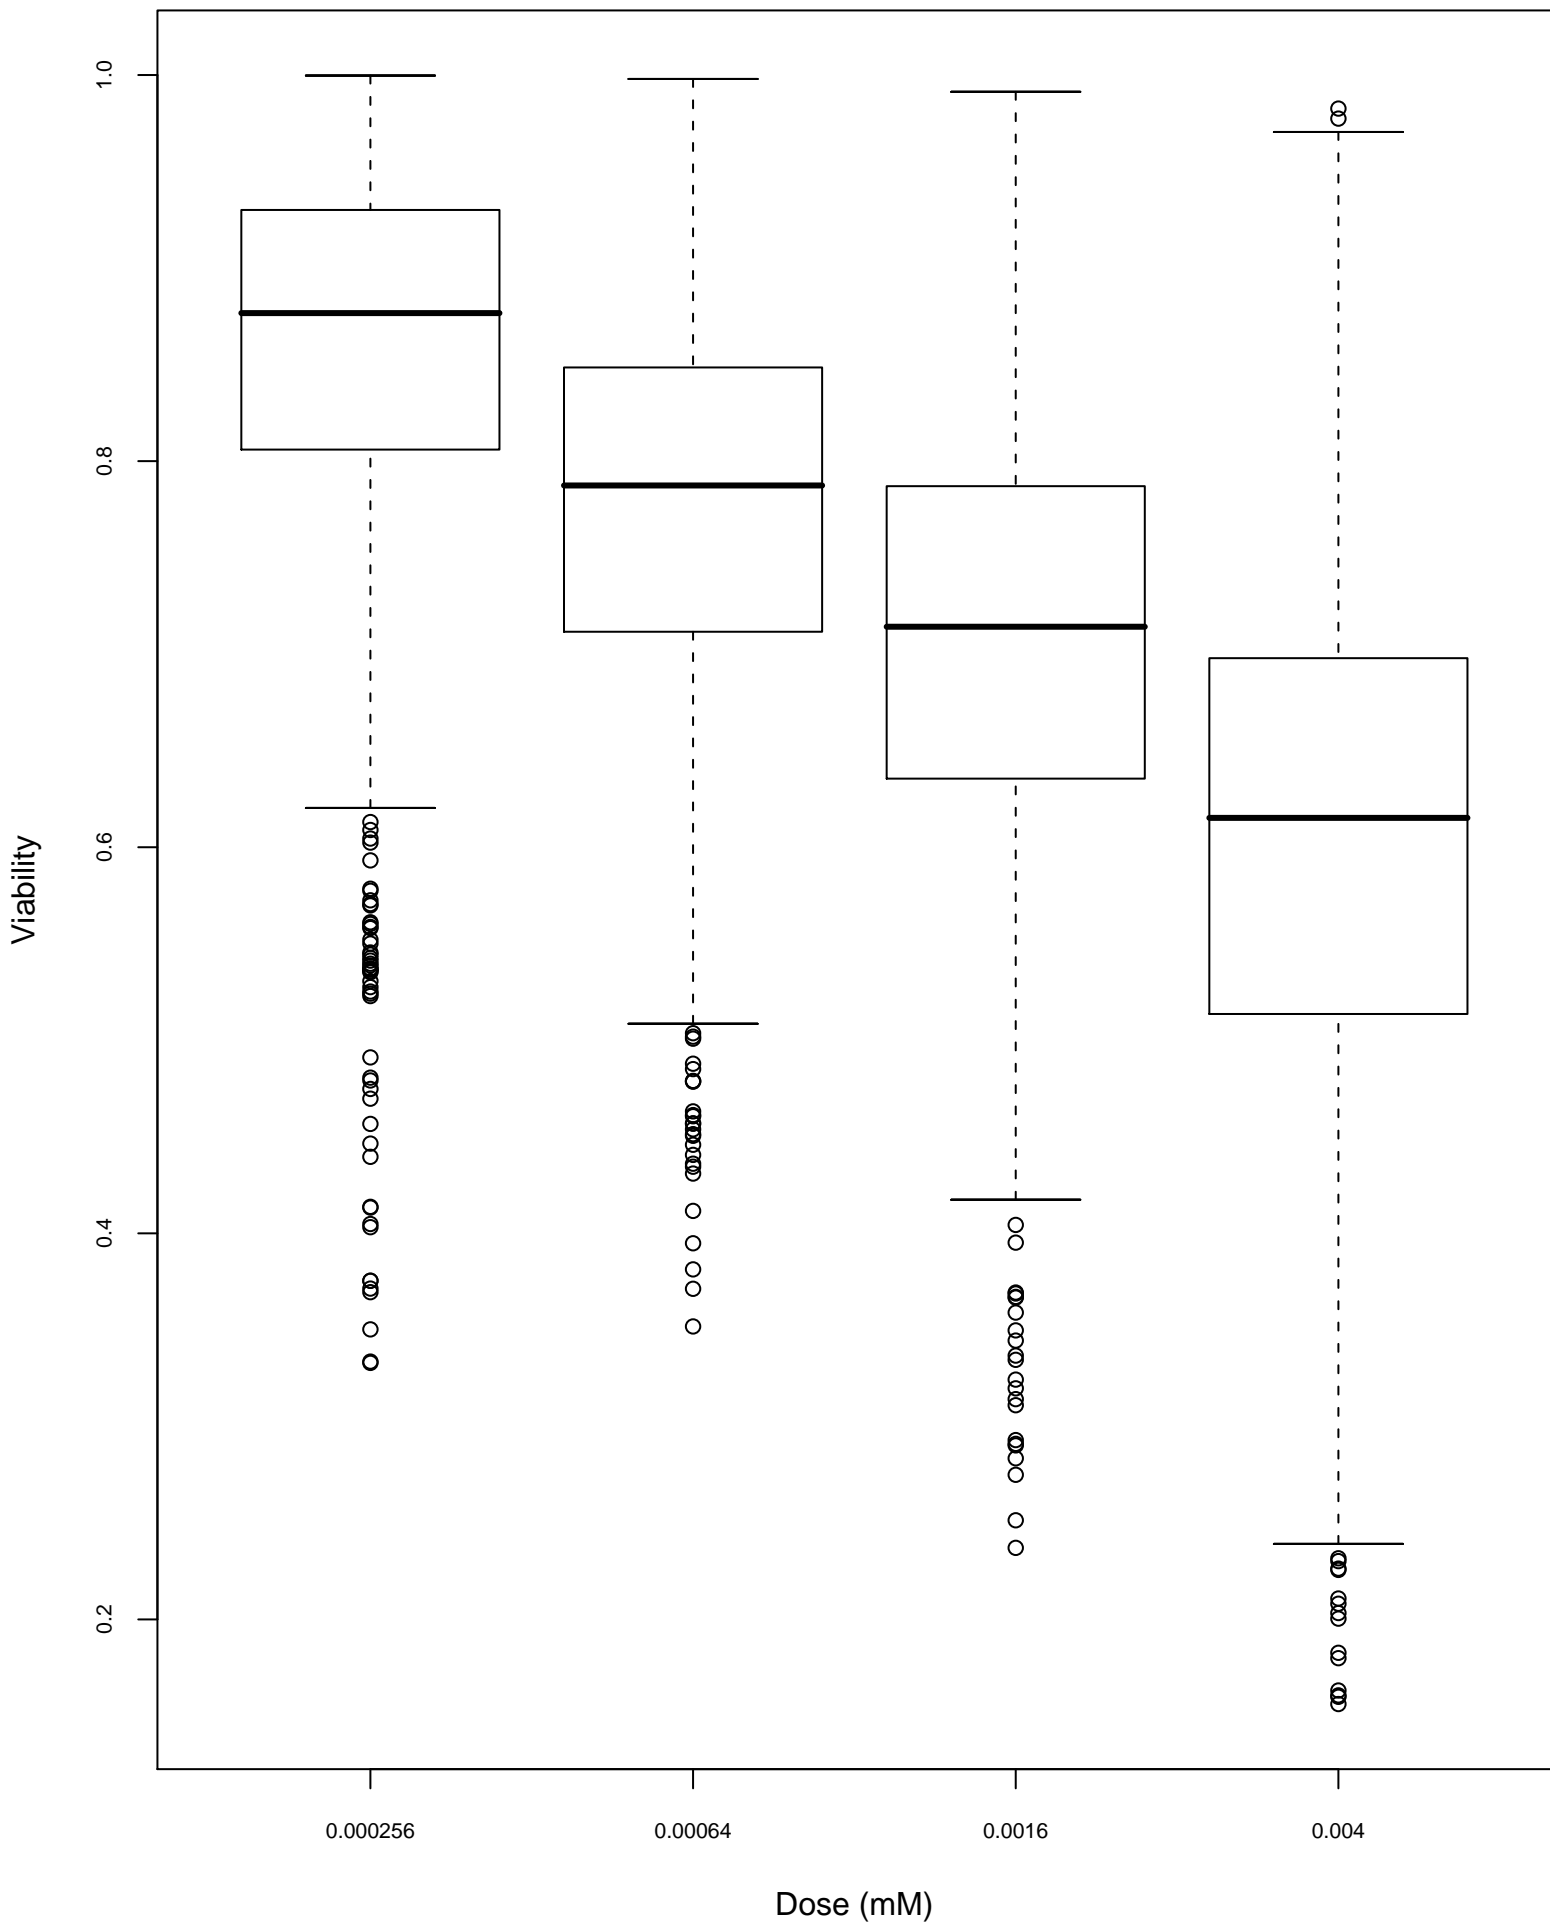

# Drug Topo

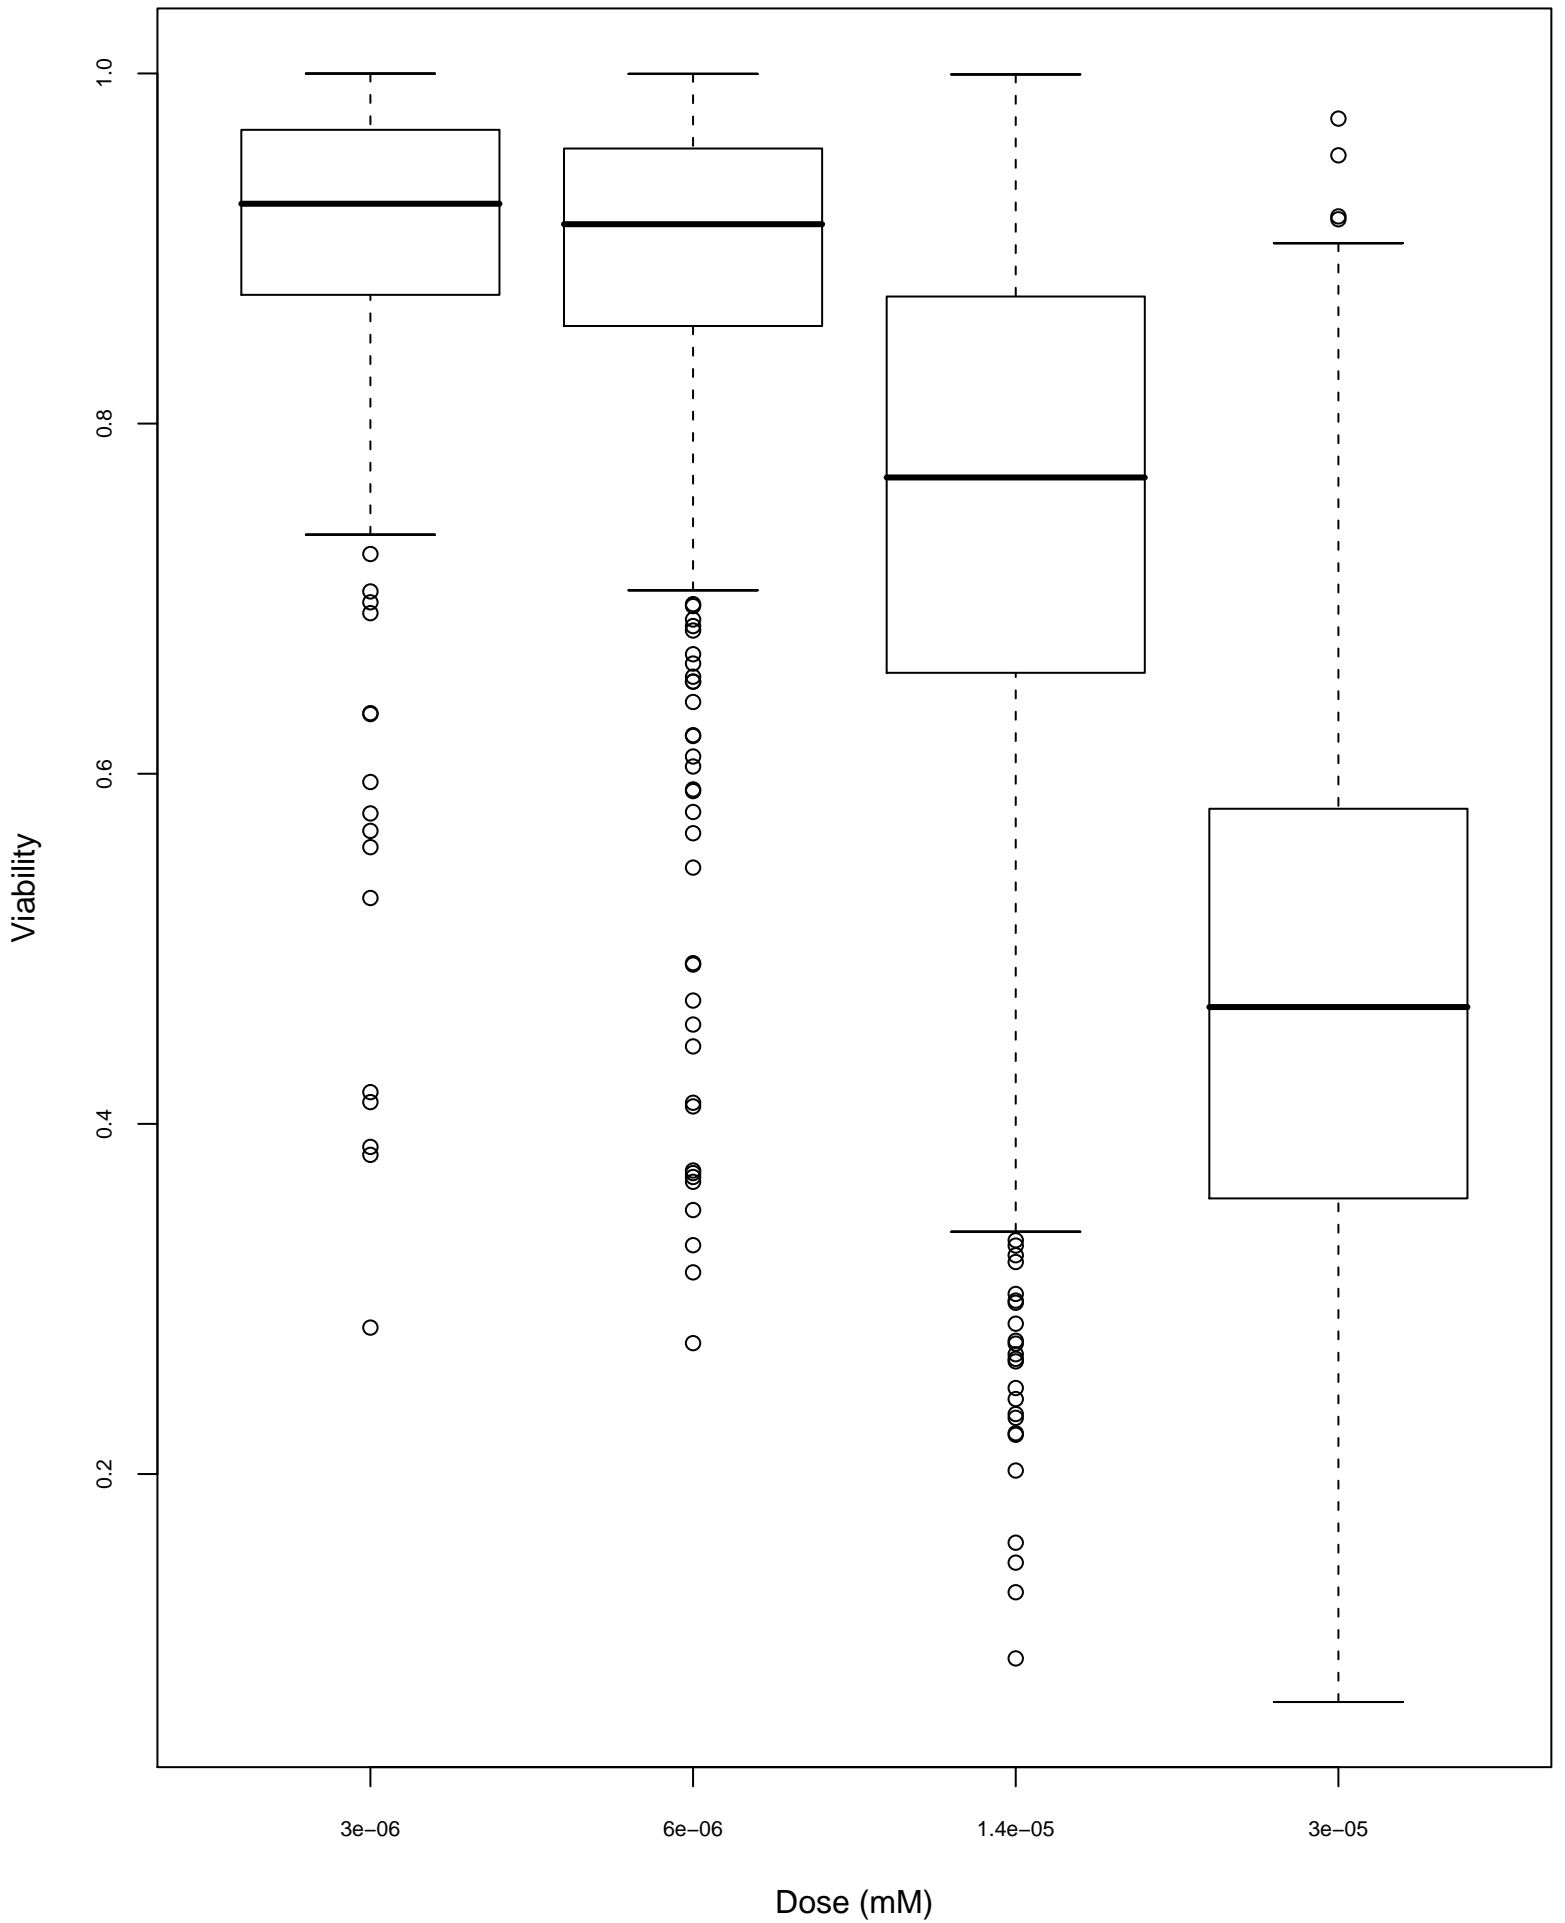

# Drug Vinb

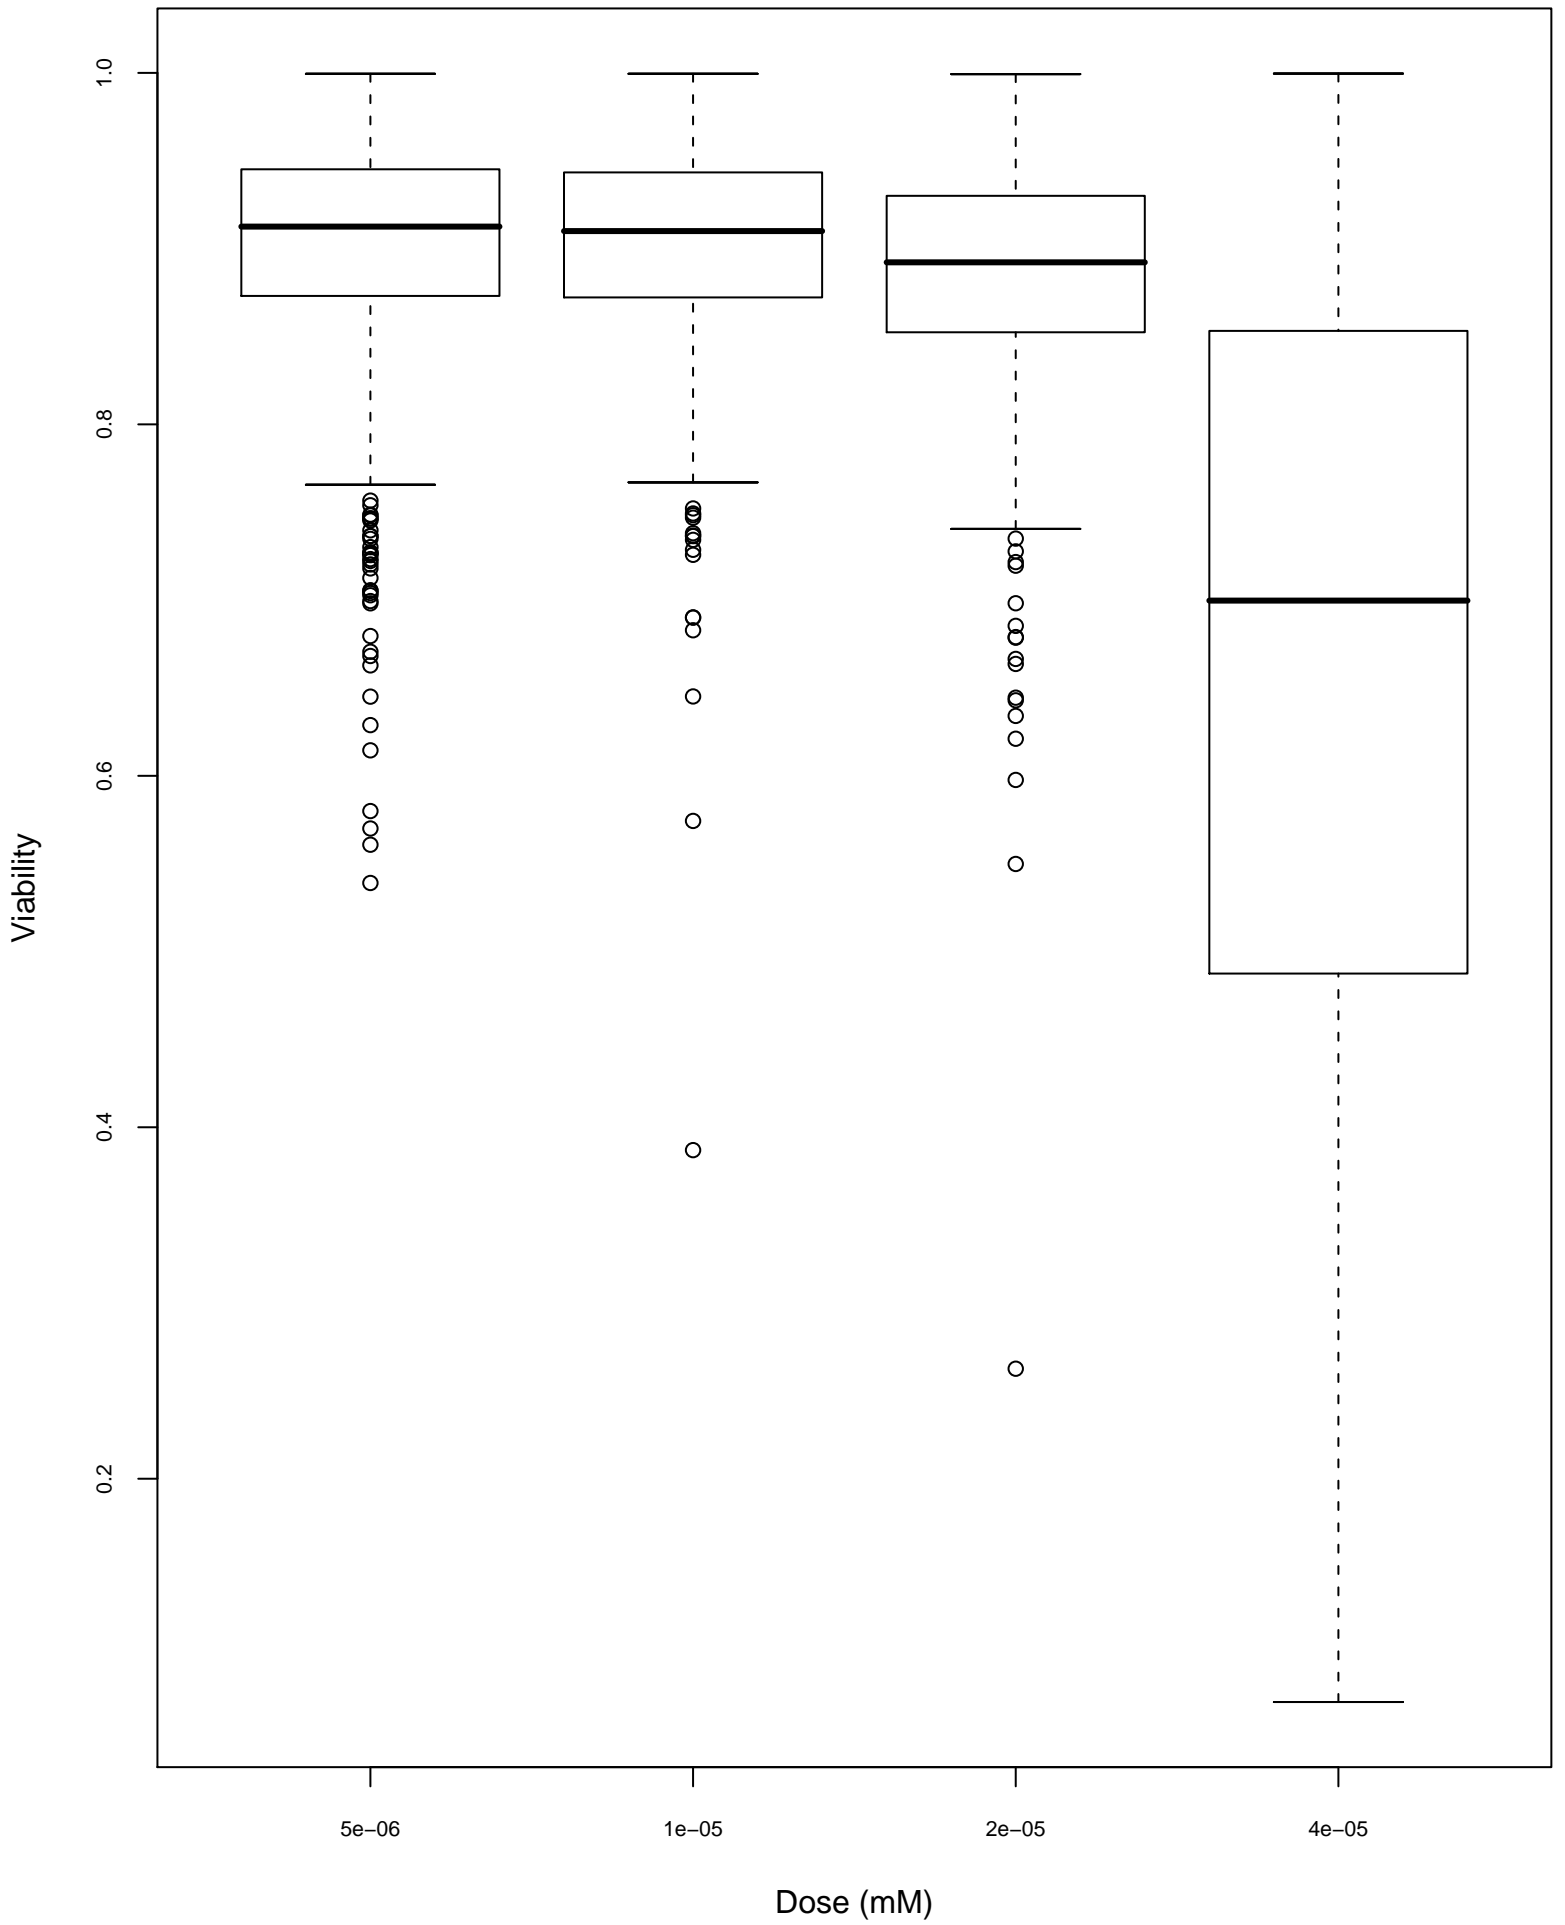

# Drug Vinc

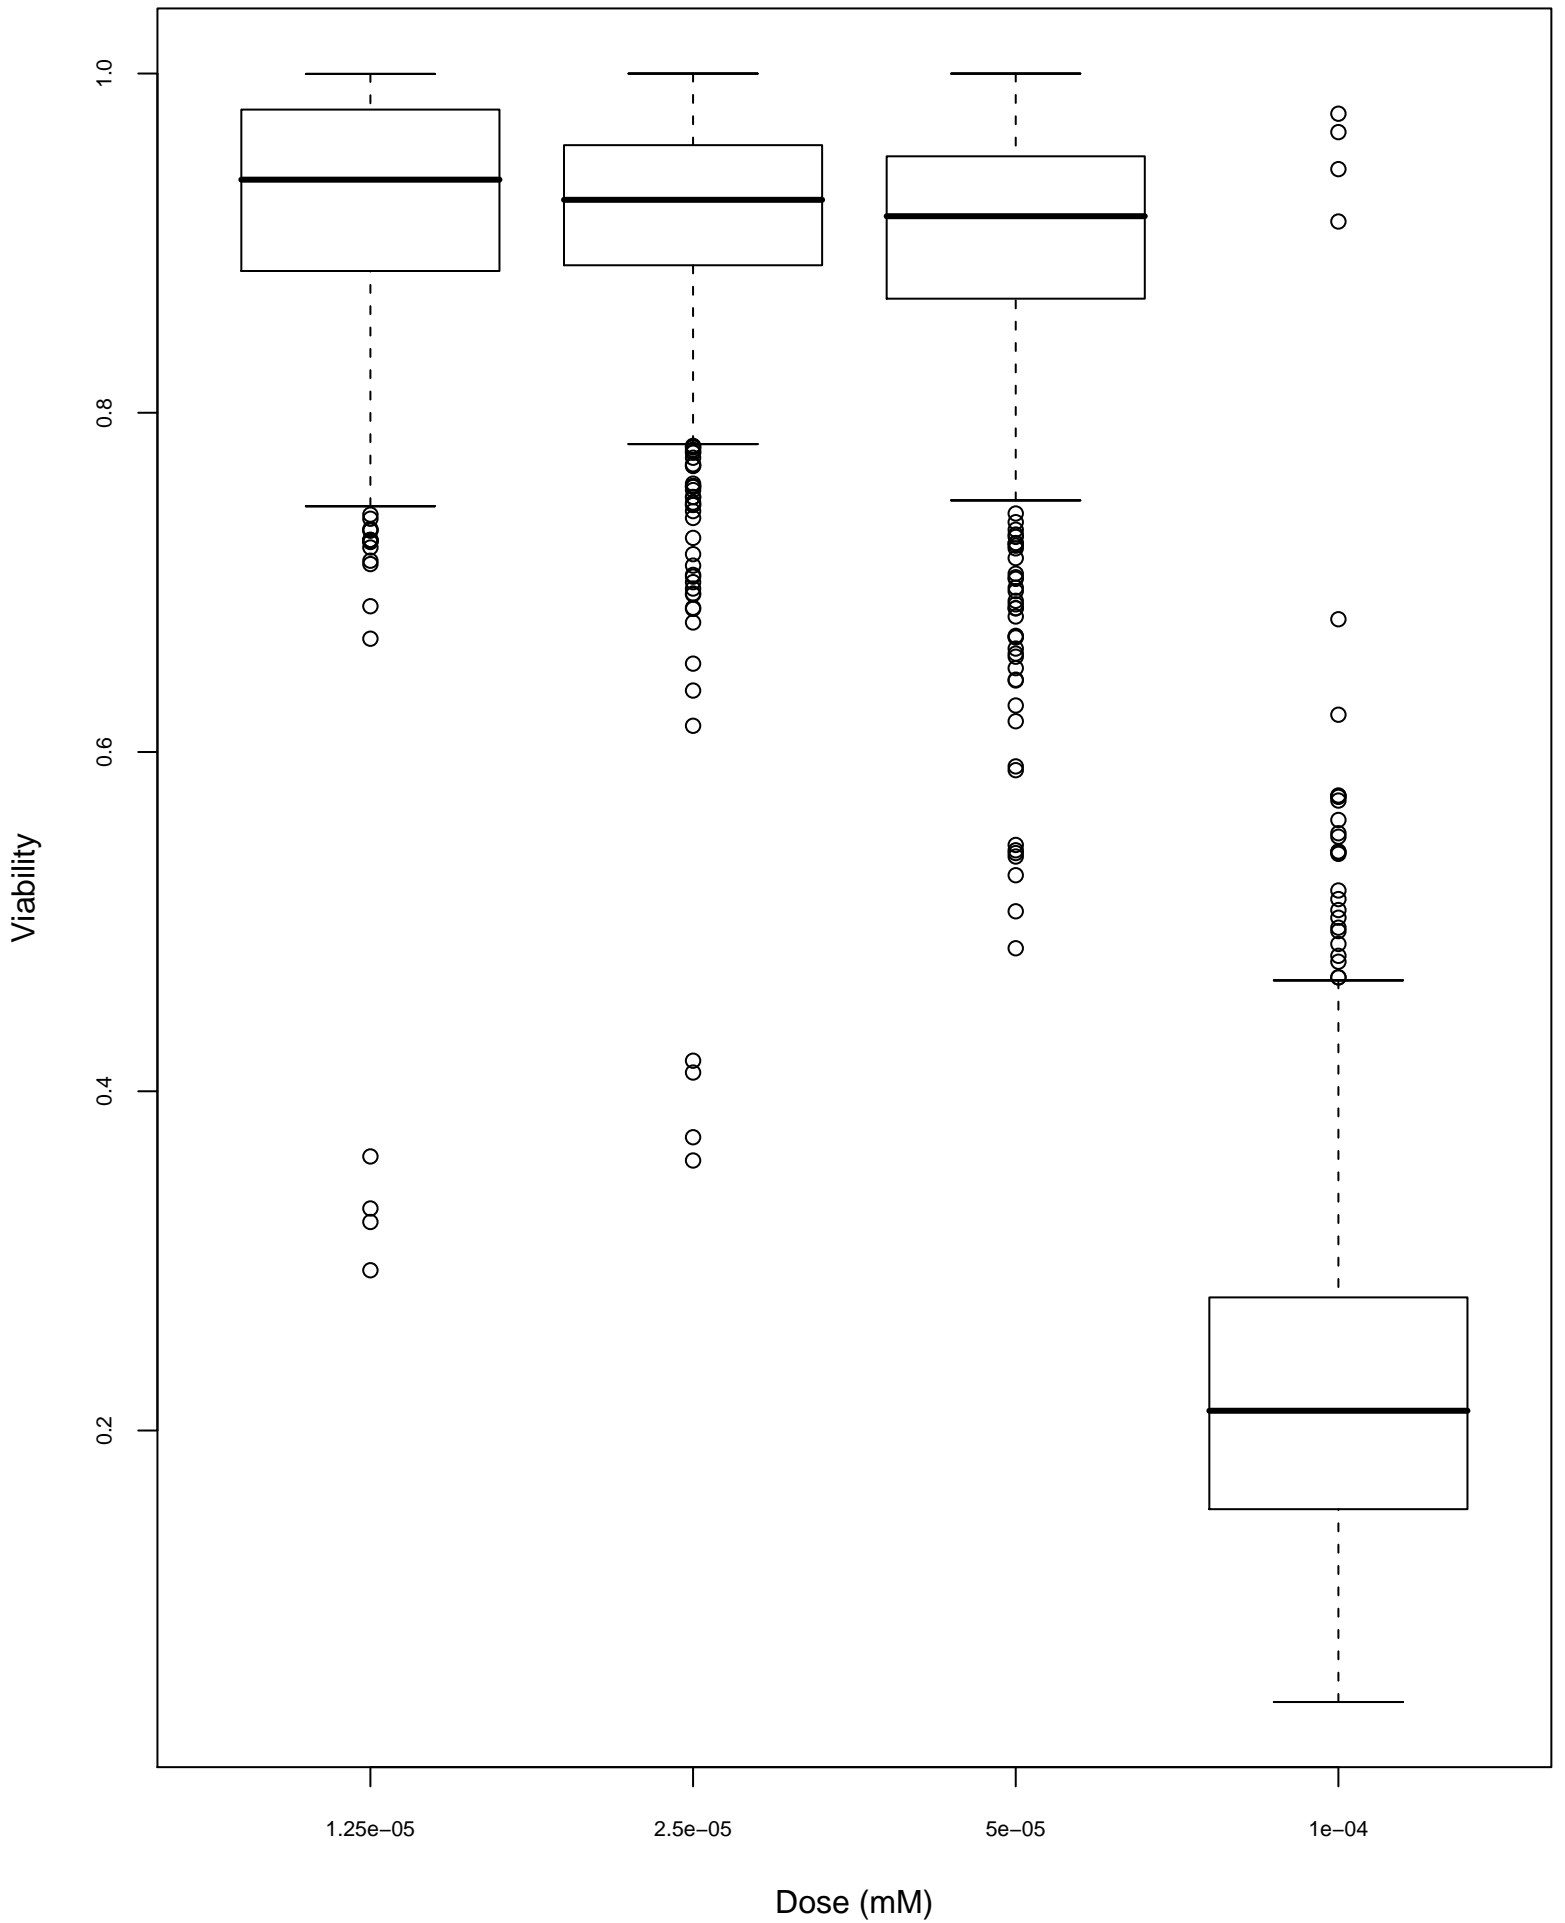

# Drug Viro

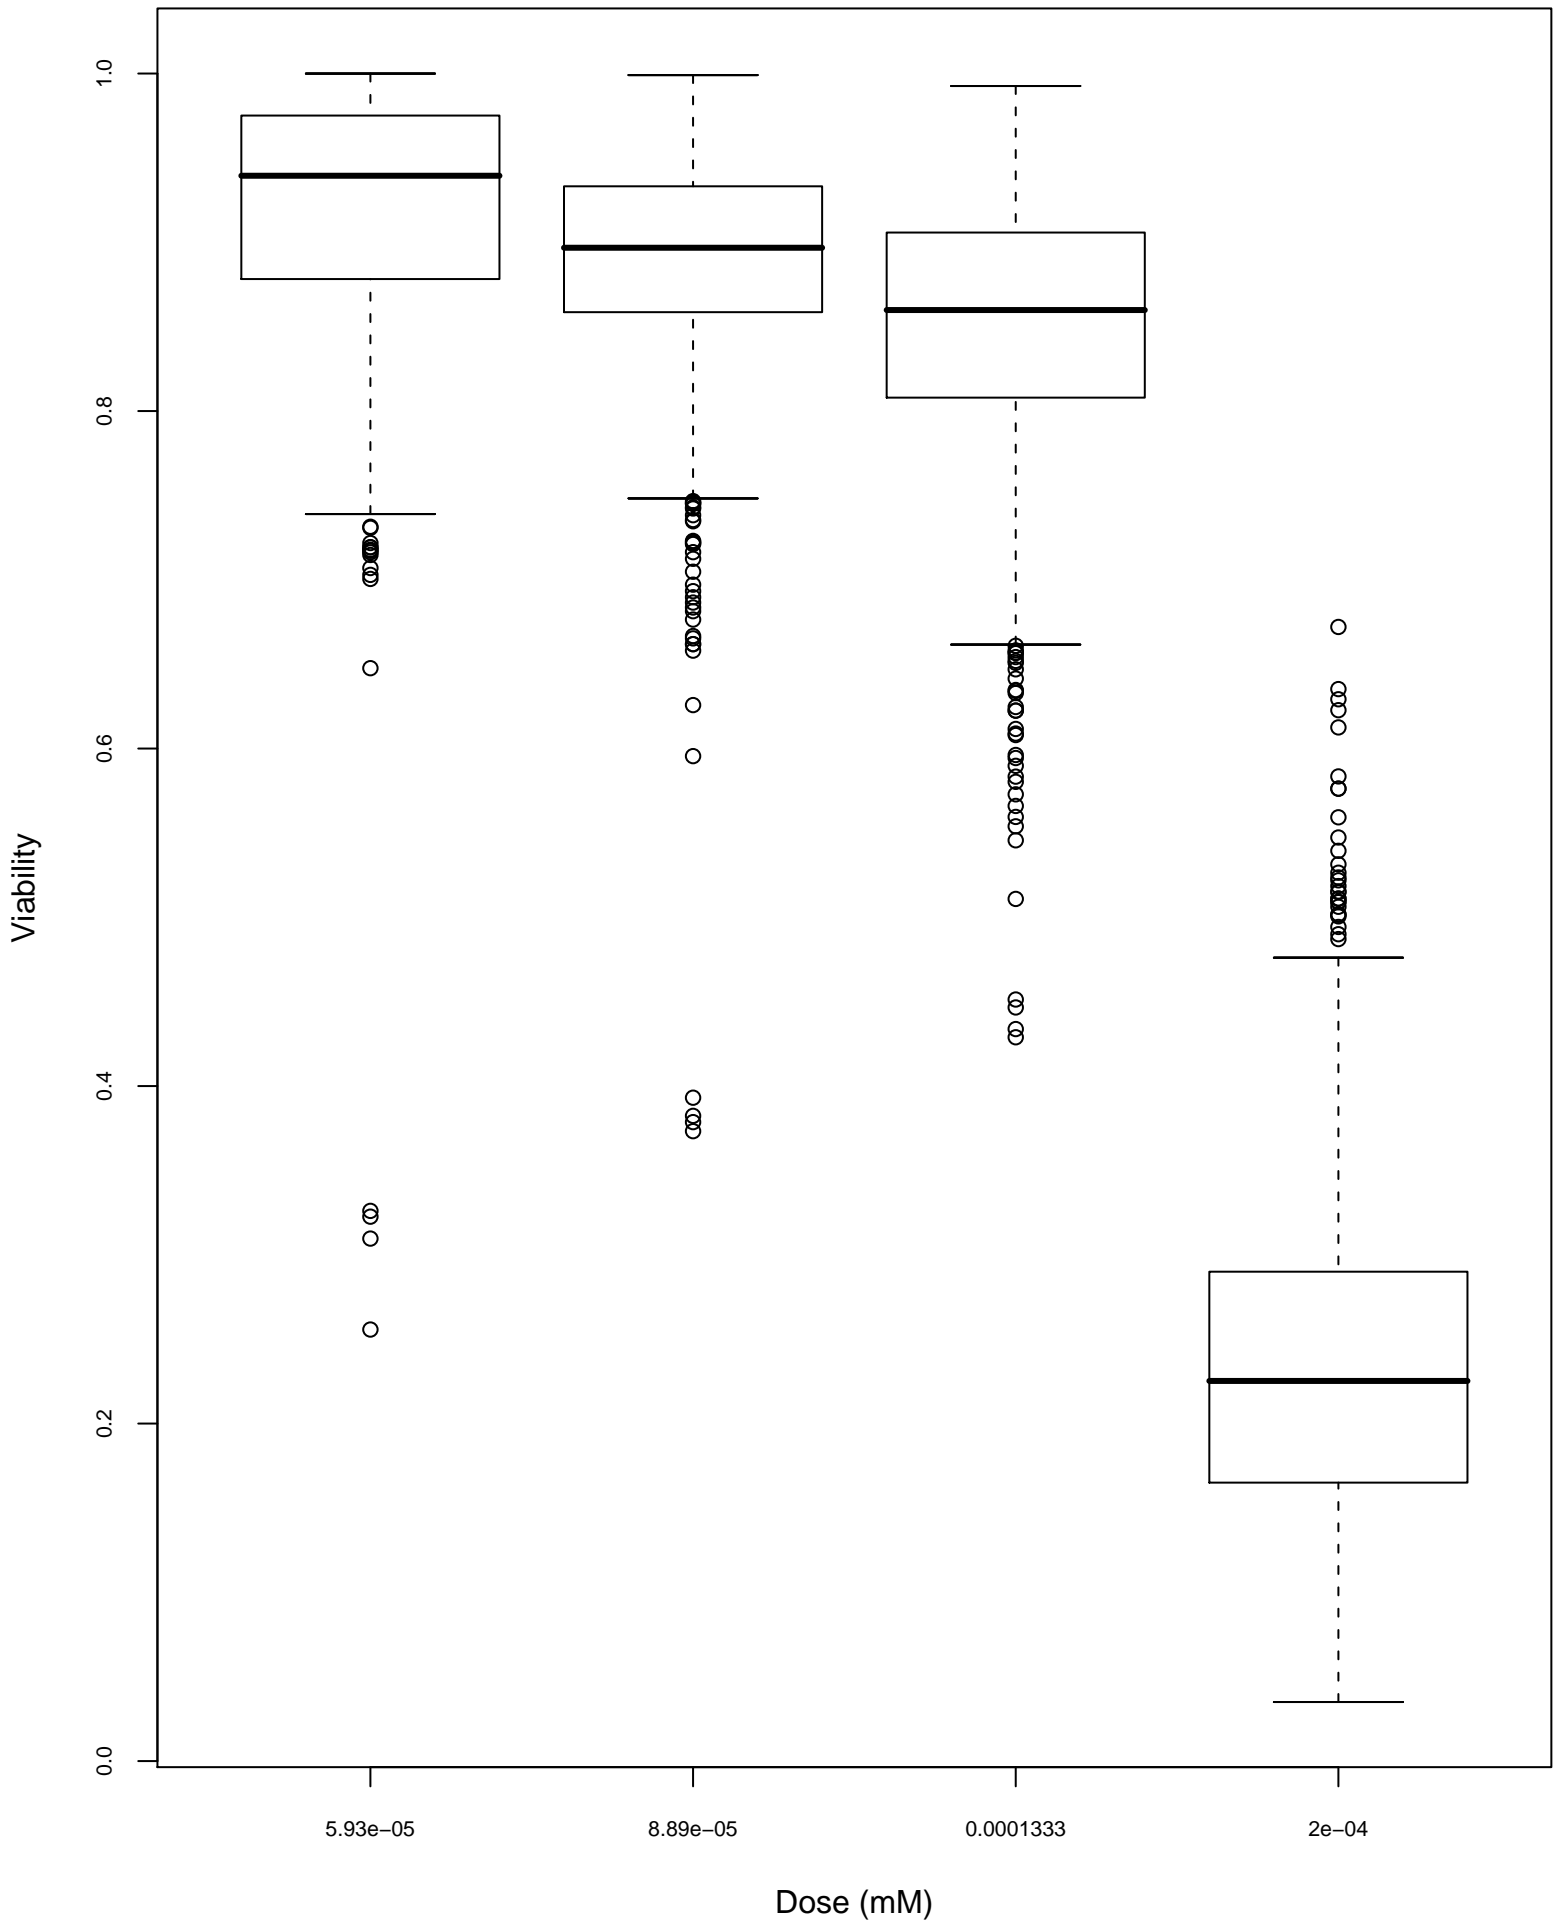

Supplement: NIHMS336613-supplement-figure_2.pdf [file NIHMS336613-supplement-figure_2.pdf]
