# Supplementary material
Source: PubMed Central journal article supplement (PMC3399590)

# 2-chloro-2'-deoxyadenosine (Clad)

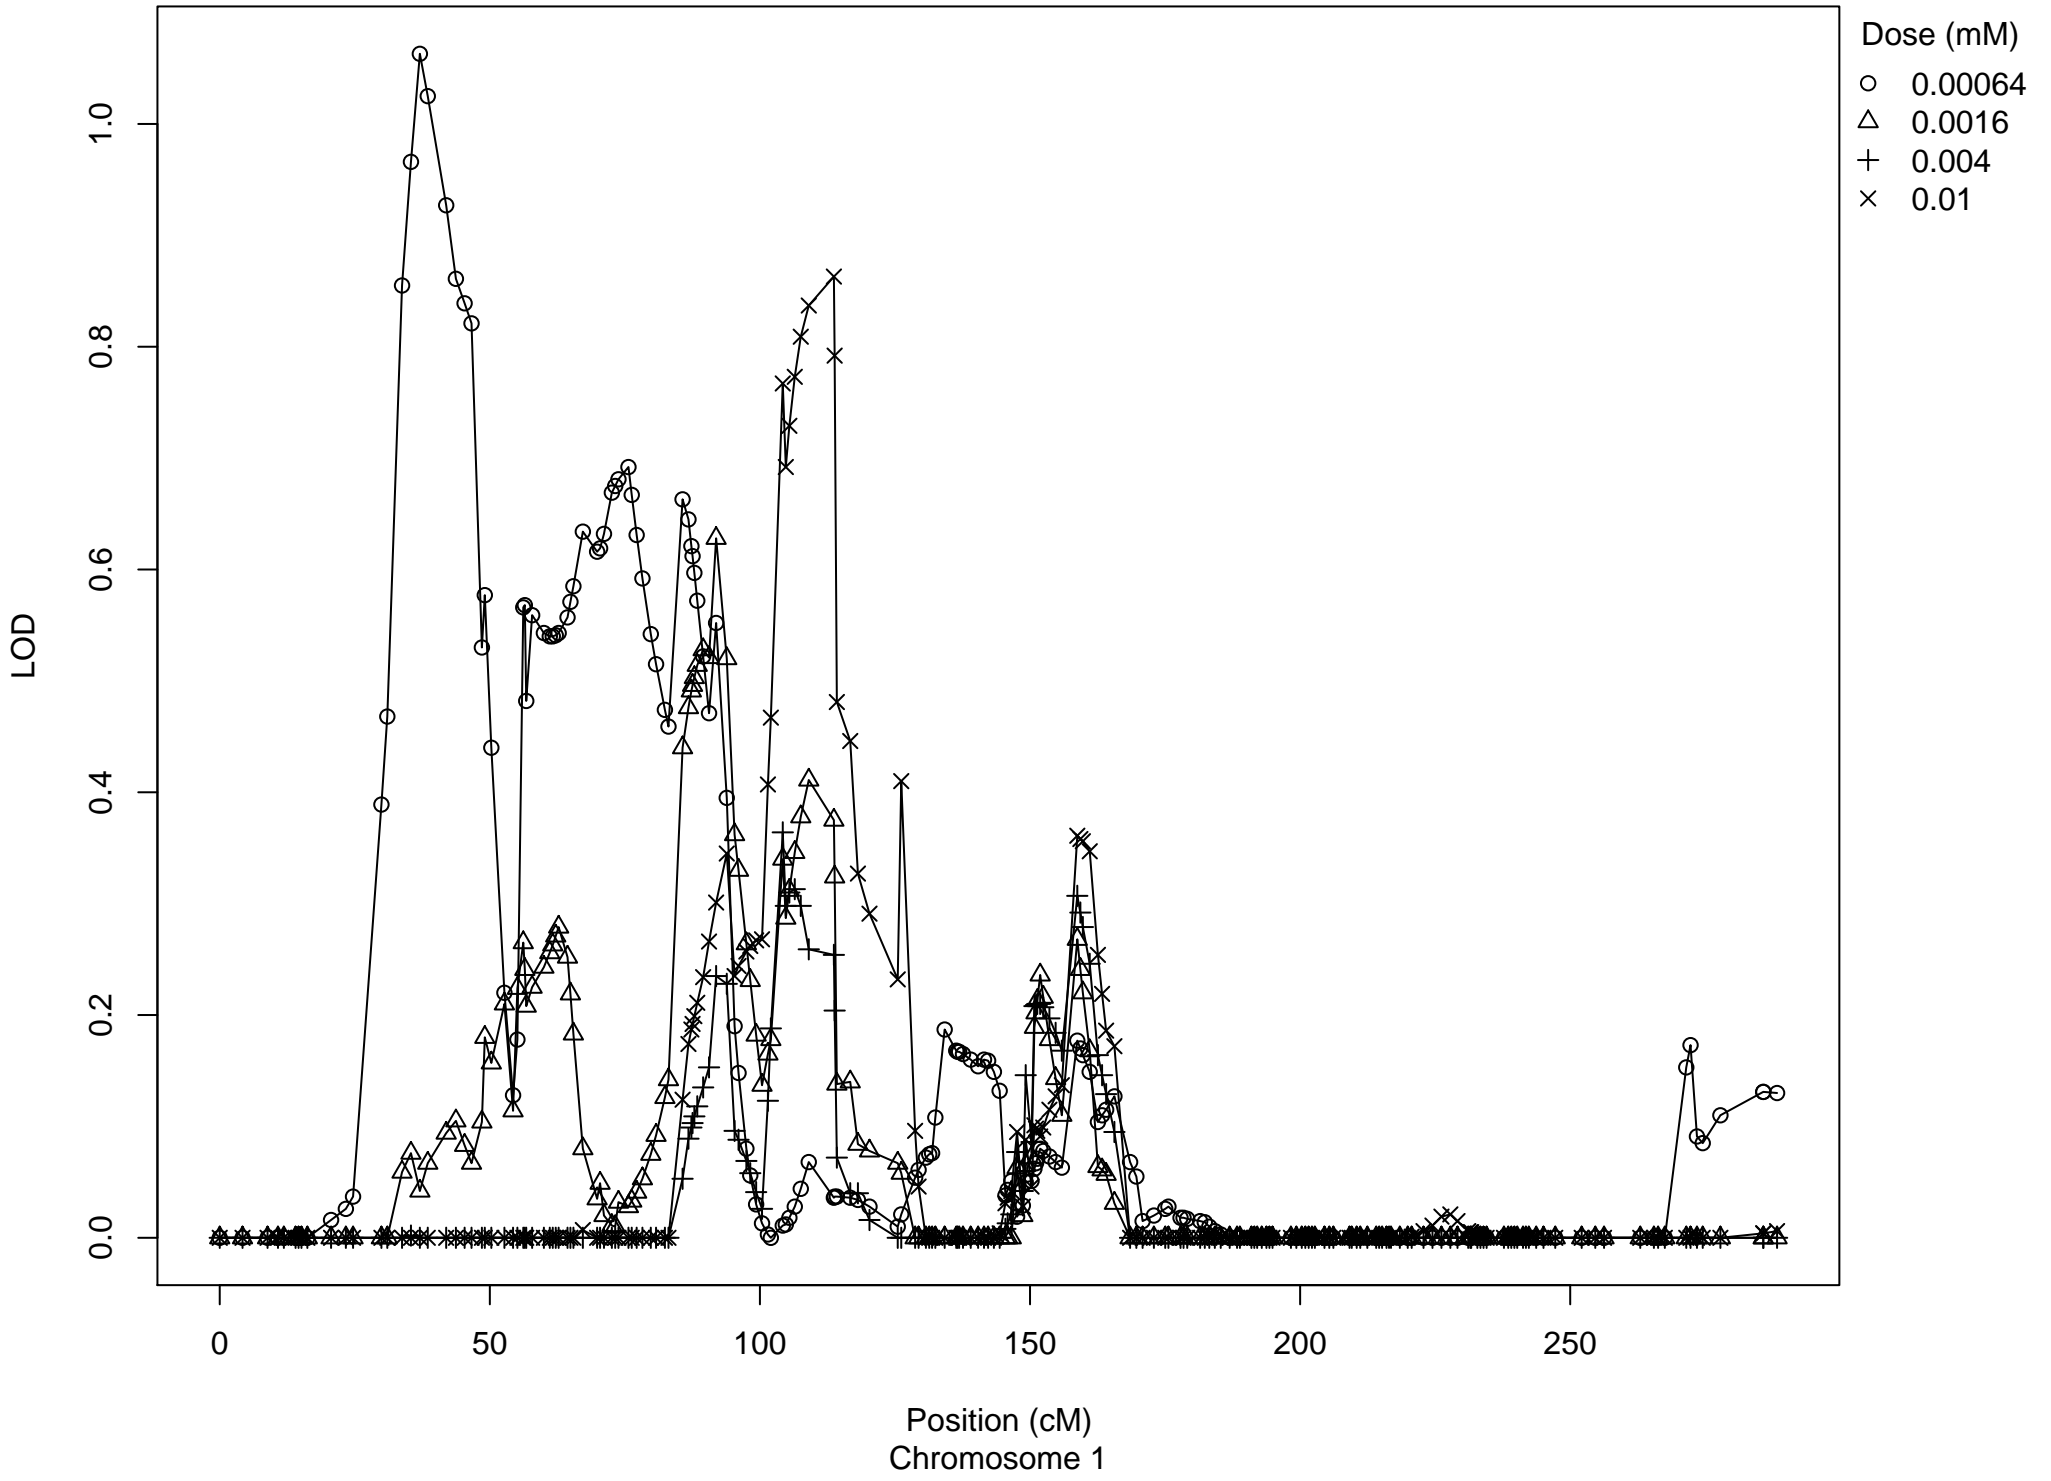

# 2-chloro-2'-deoxyadenosine (Clad)

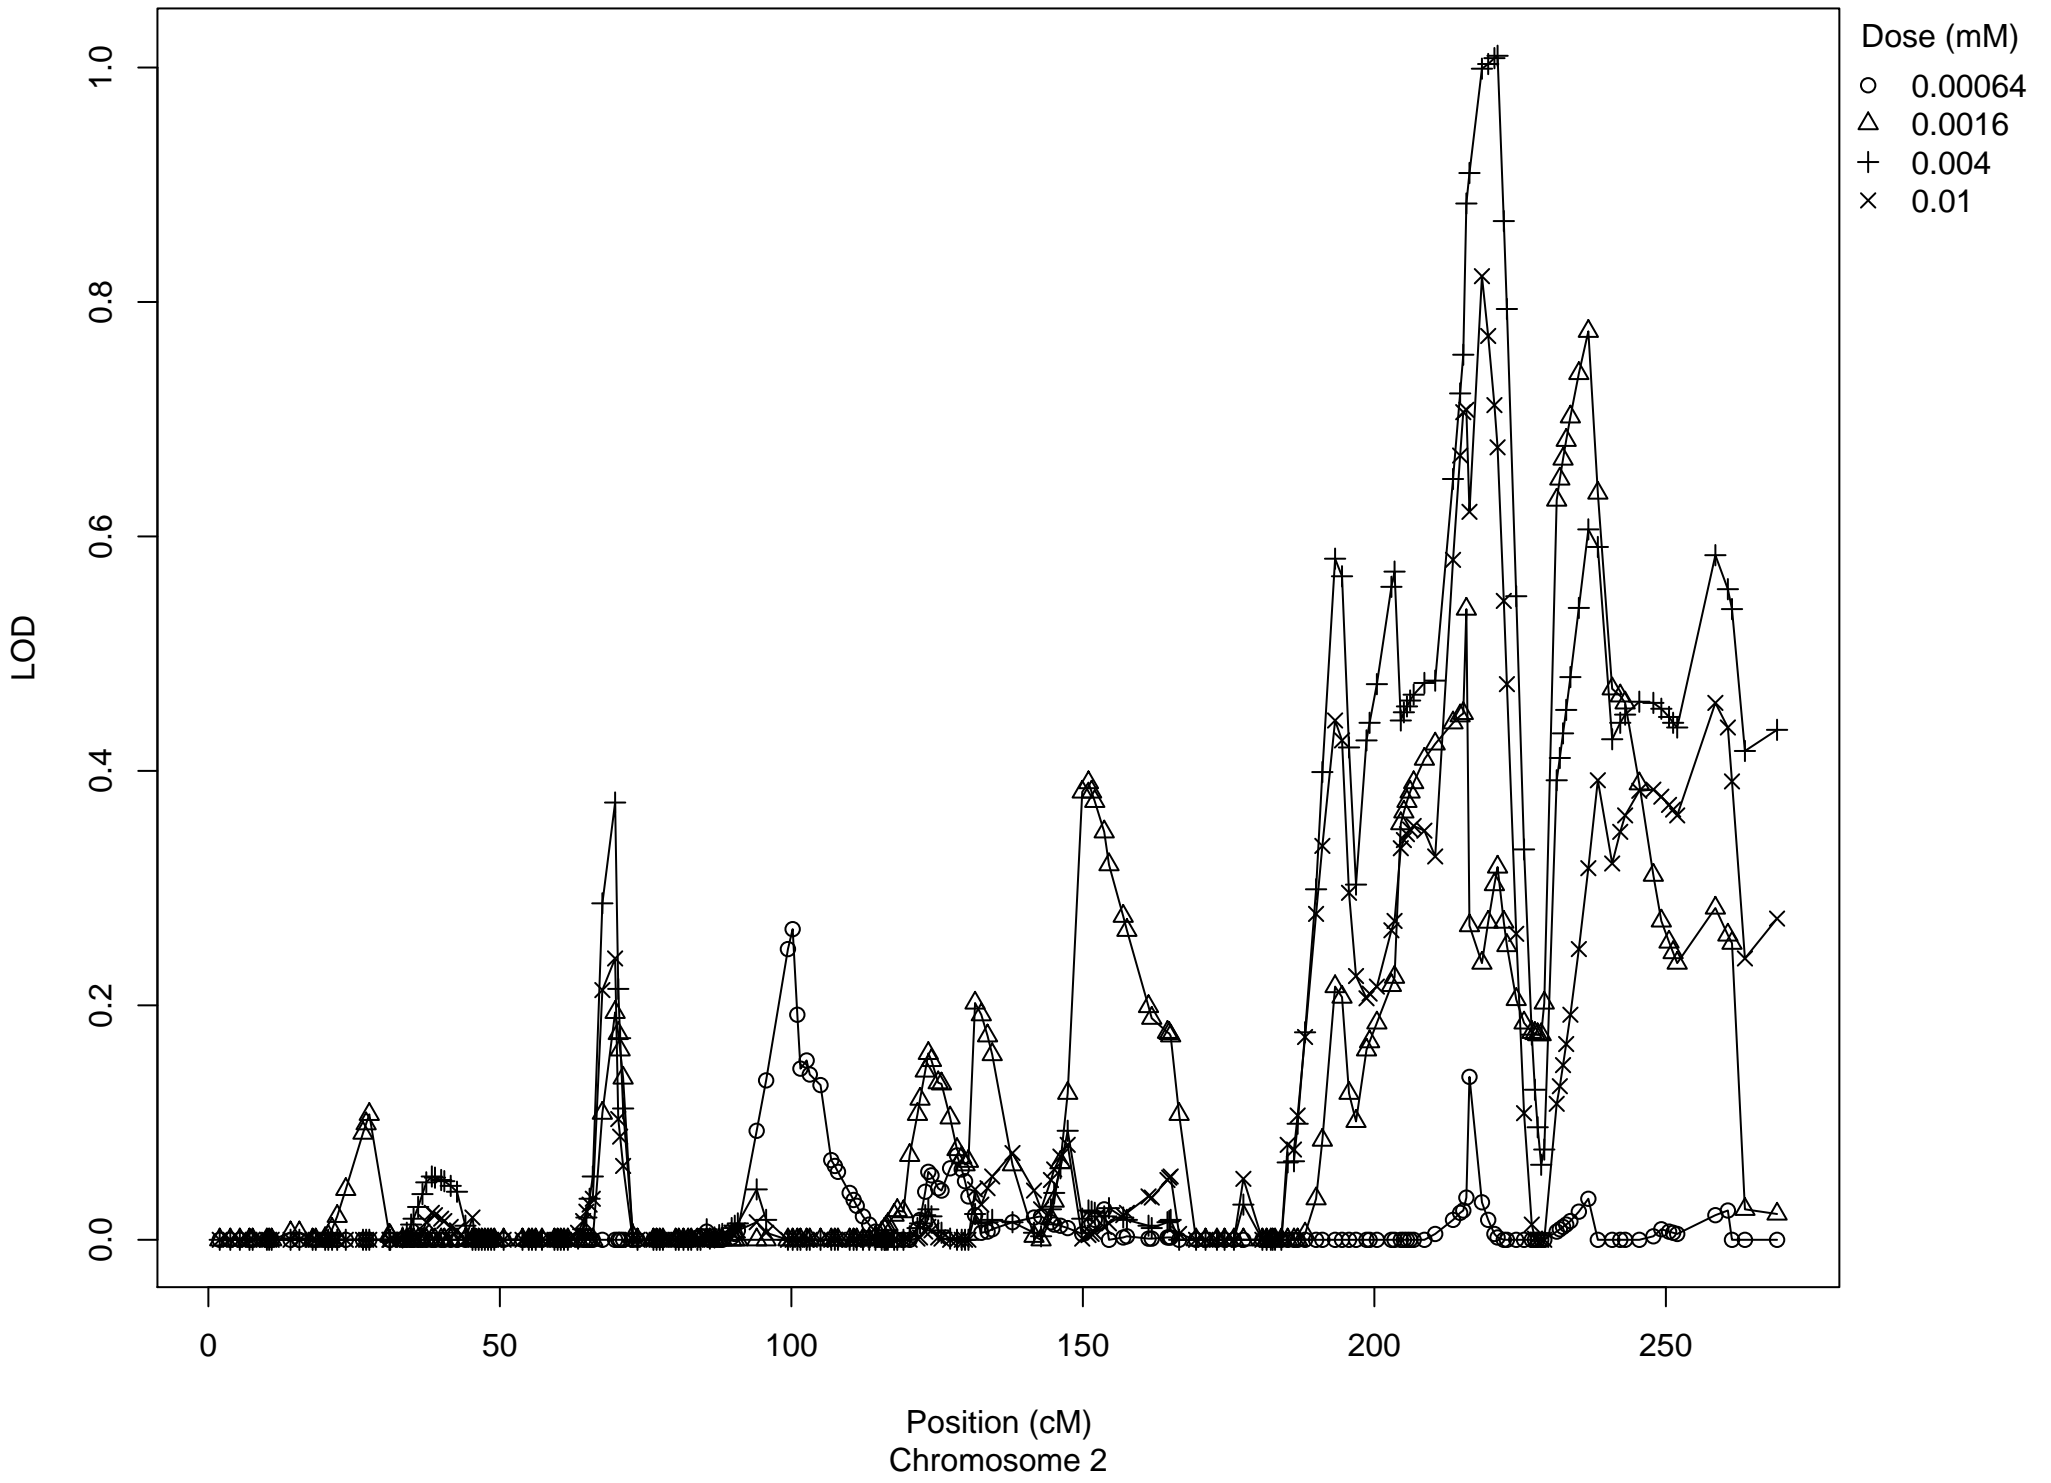

# 2-chloro-2'-deoxyadenosine (Clad)

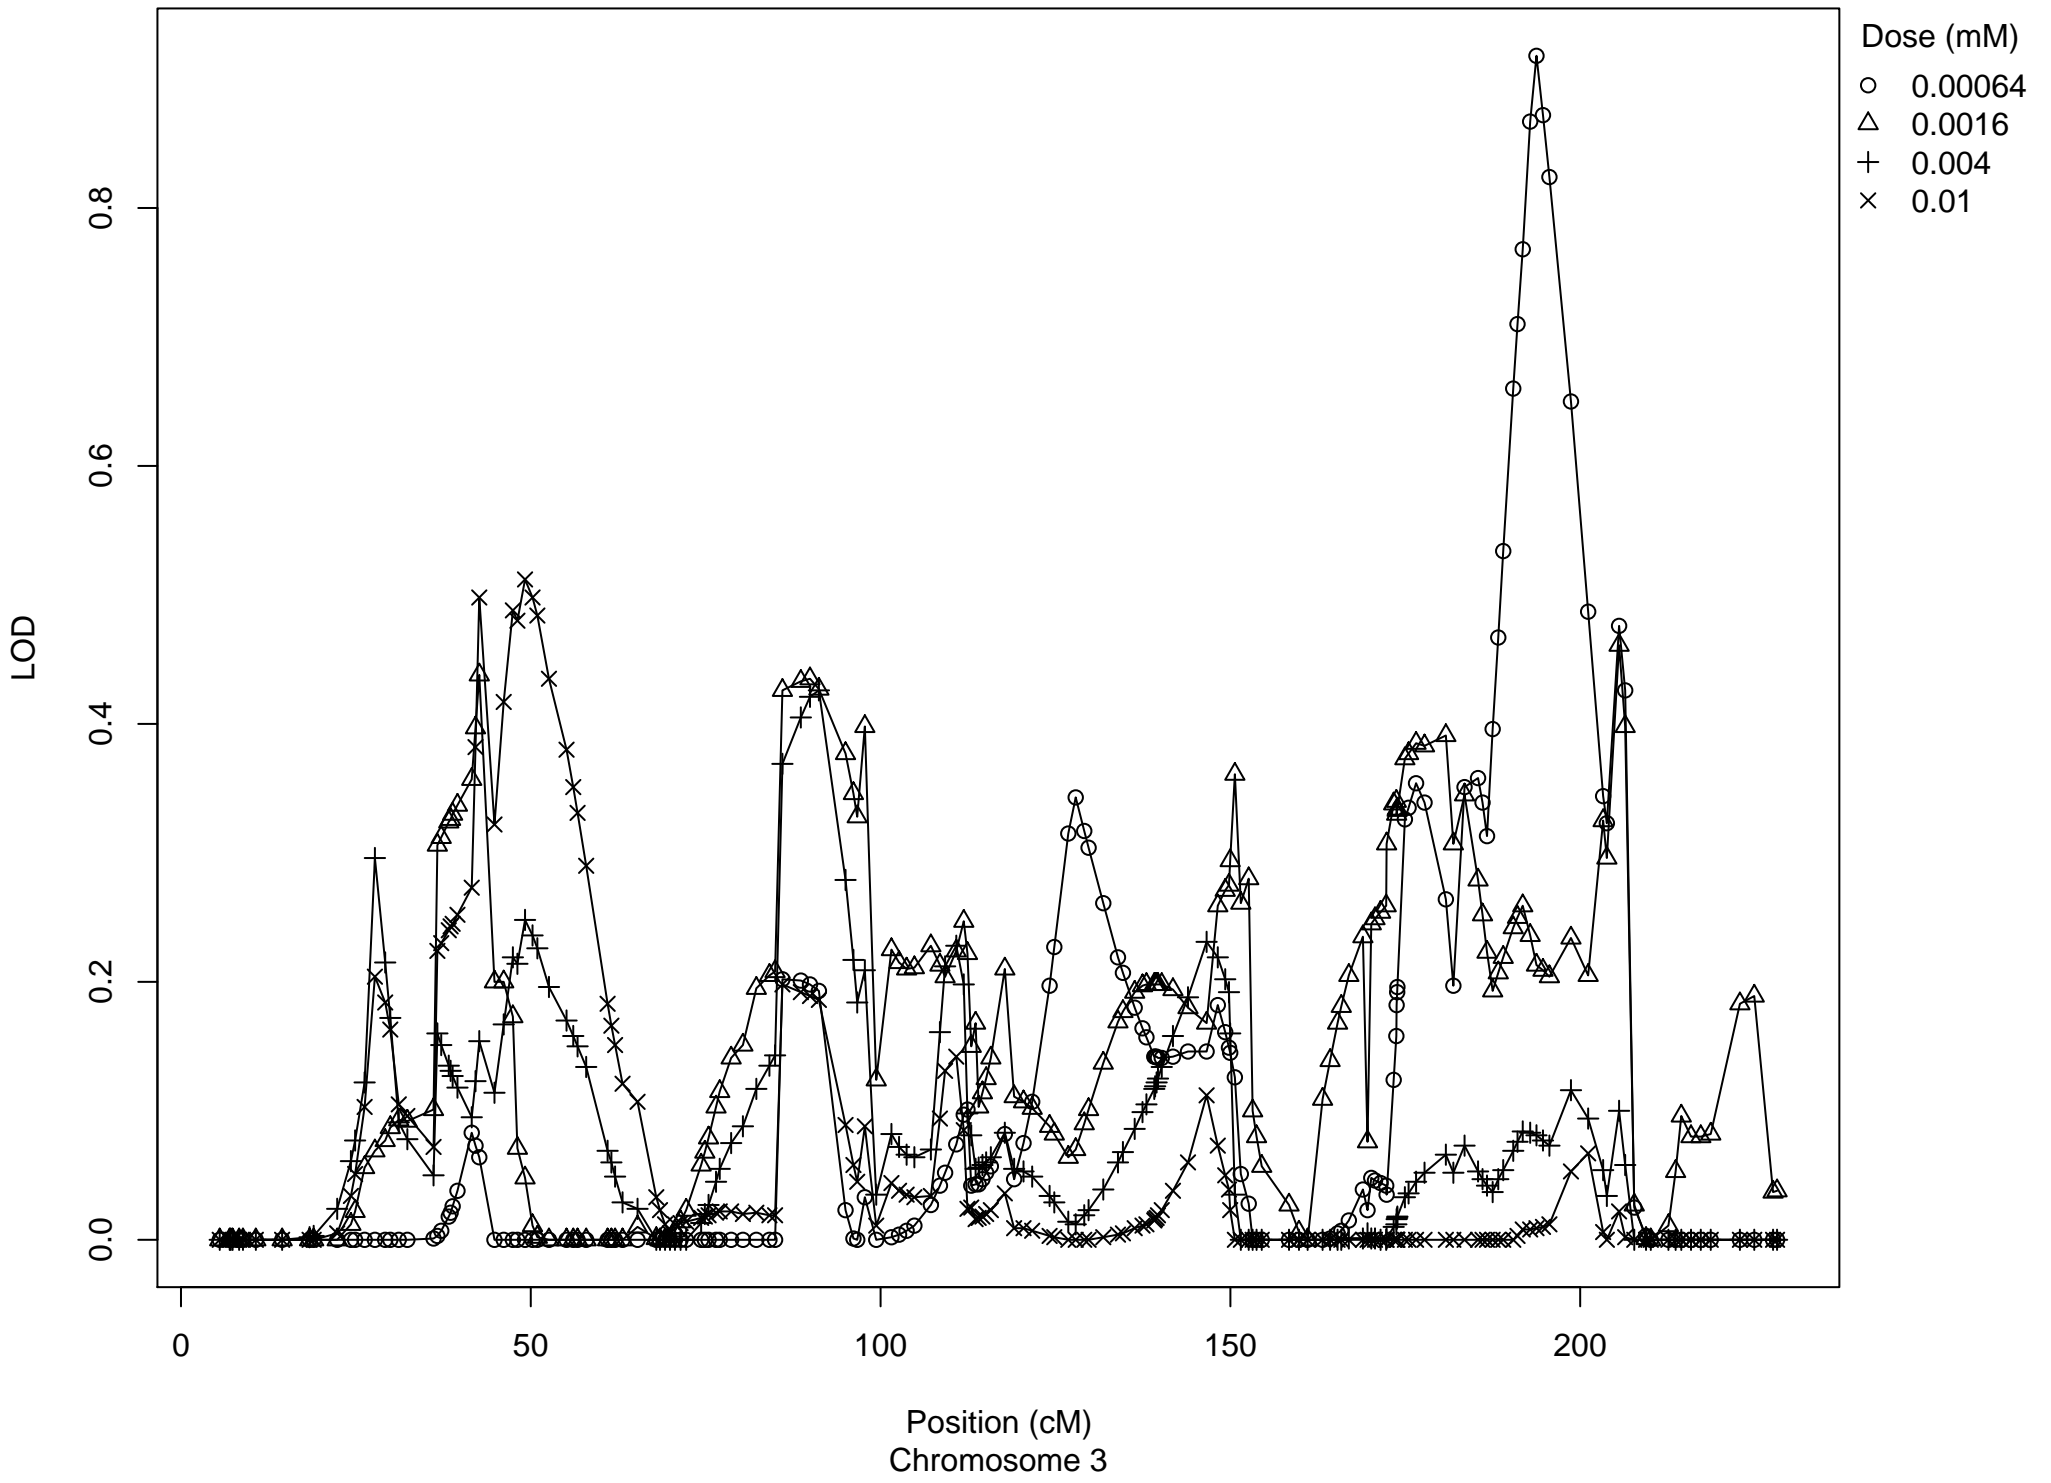

# 2-chloro-2'-deoxyadenosine (Clad)

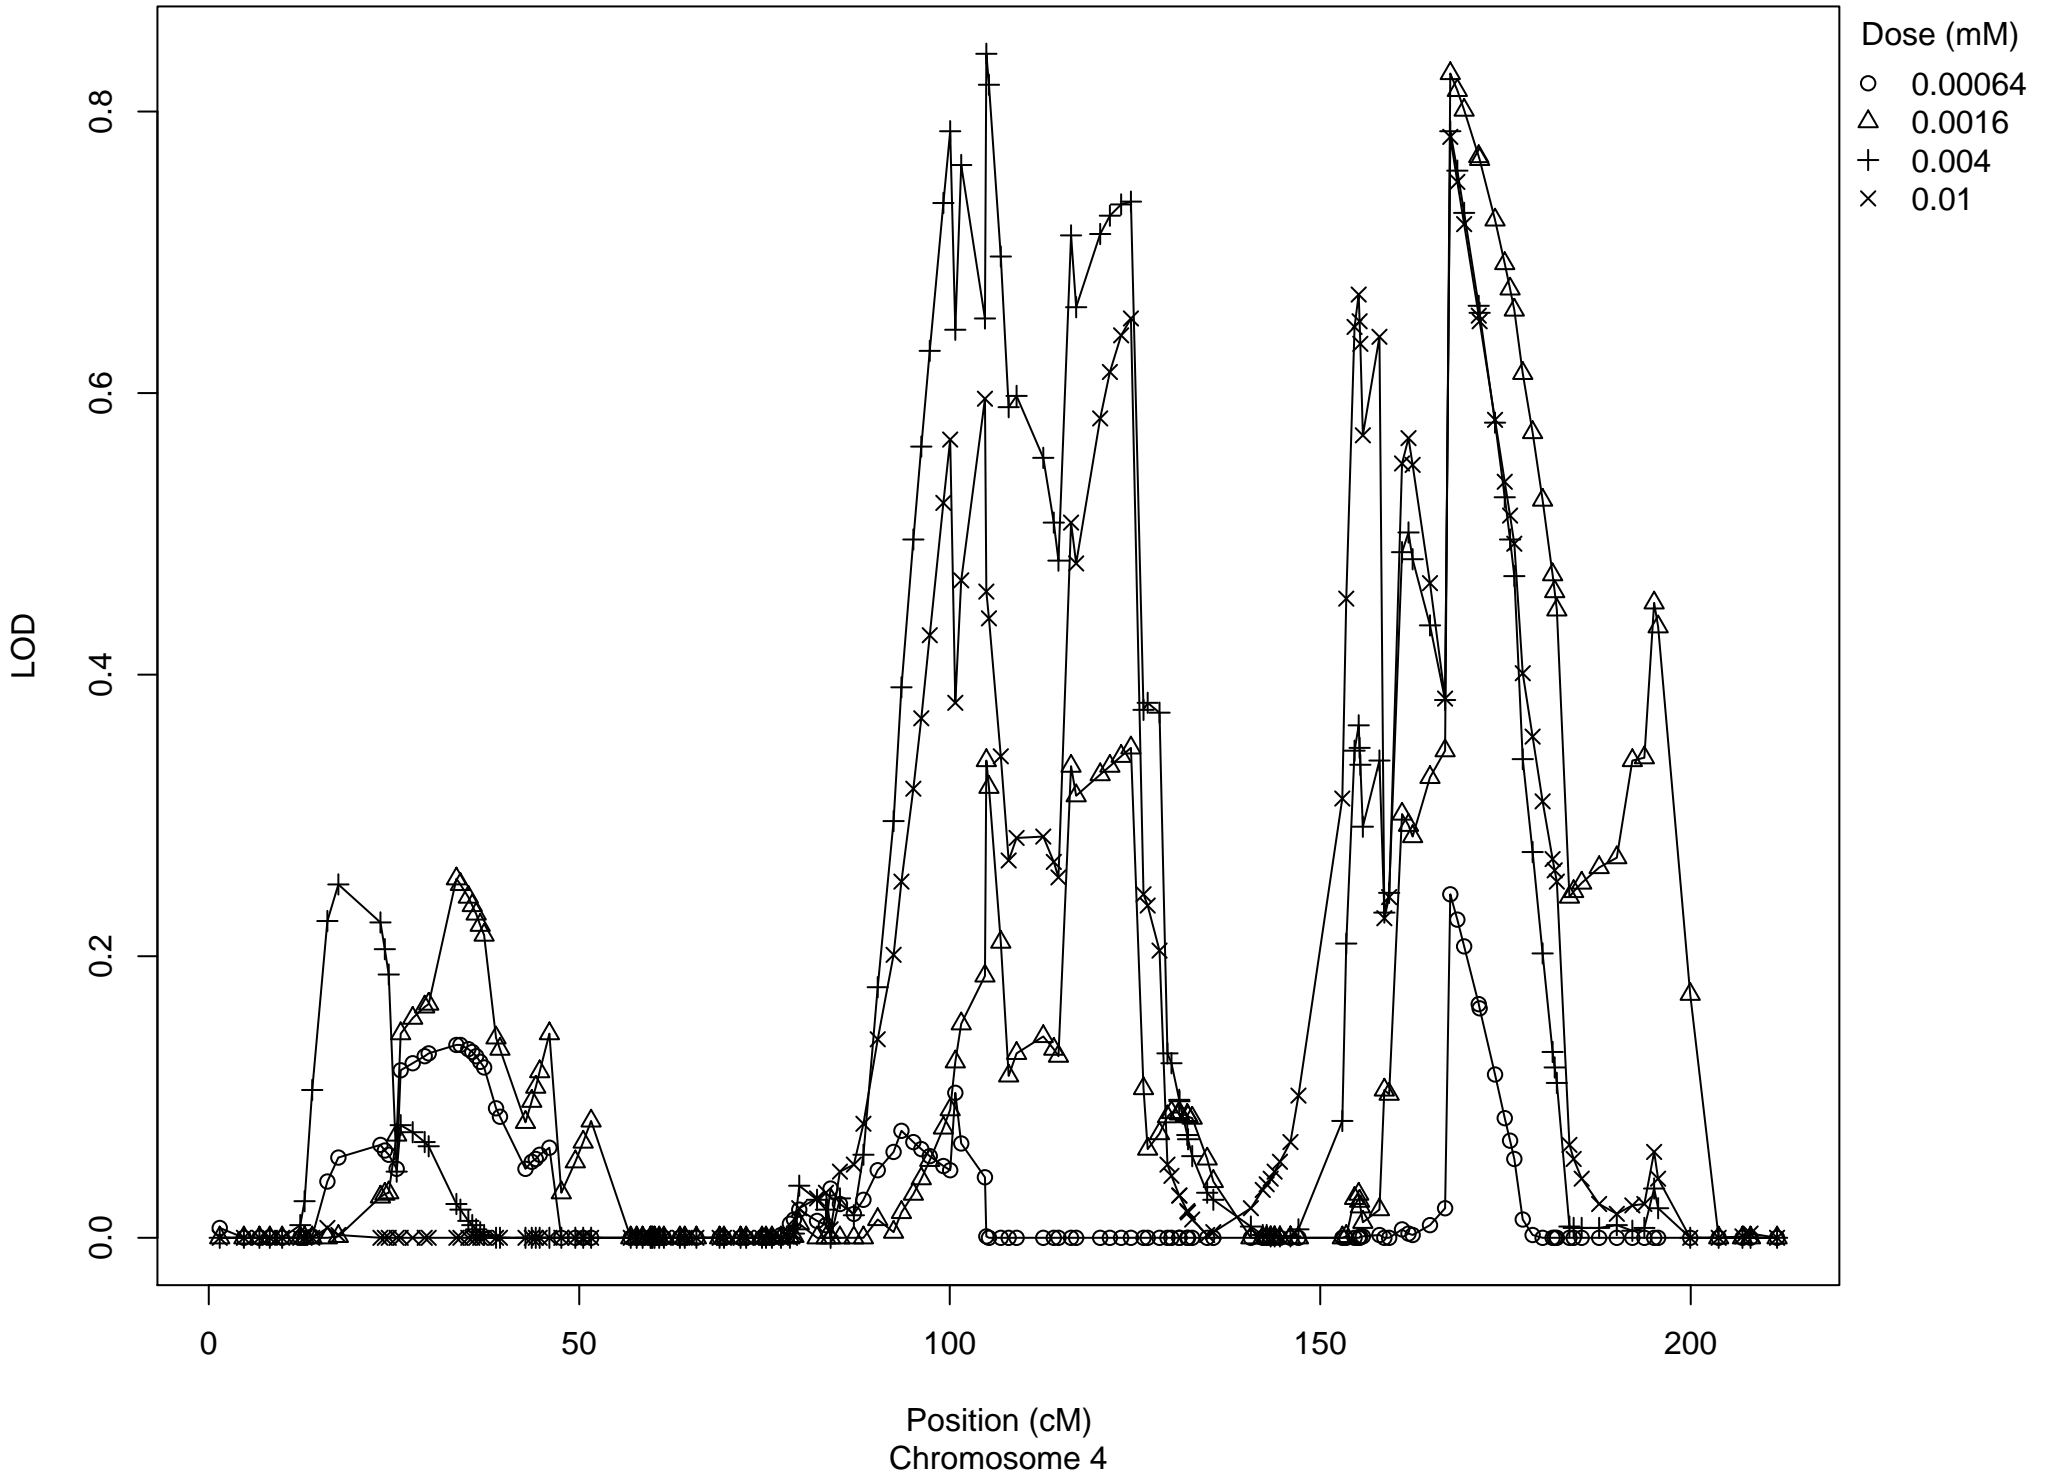

# 2-chloro-2'-deoxyadenosine (Clad)

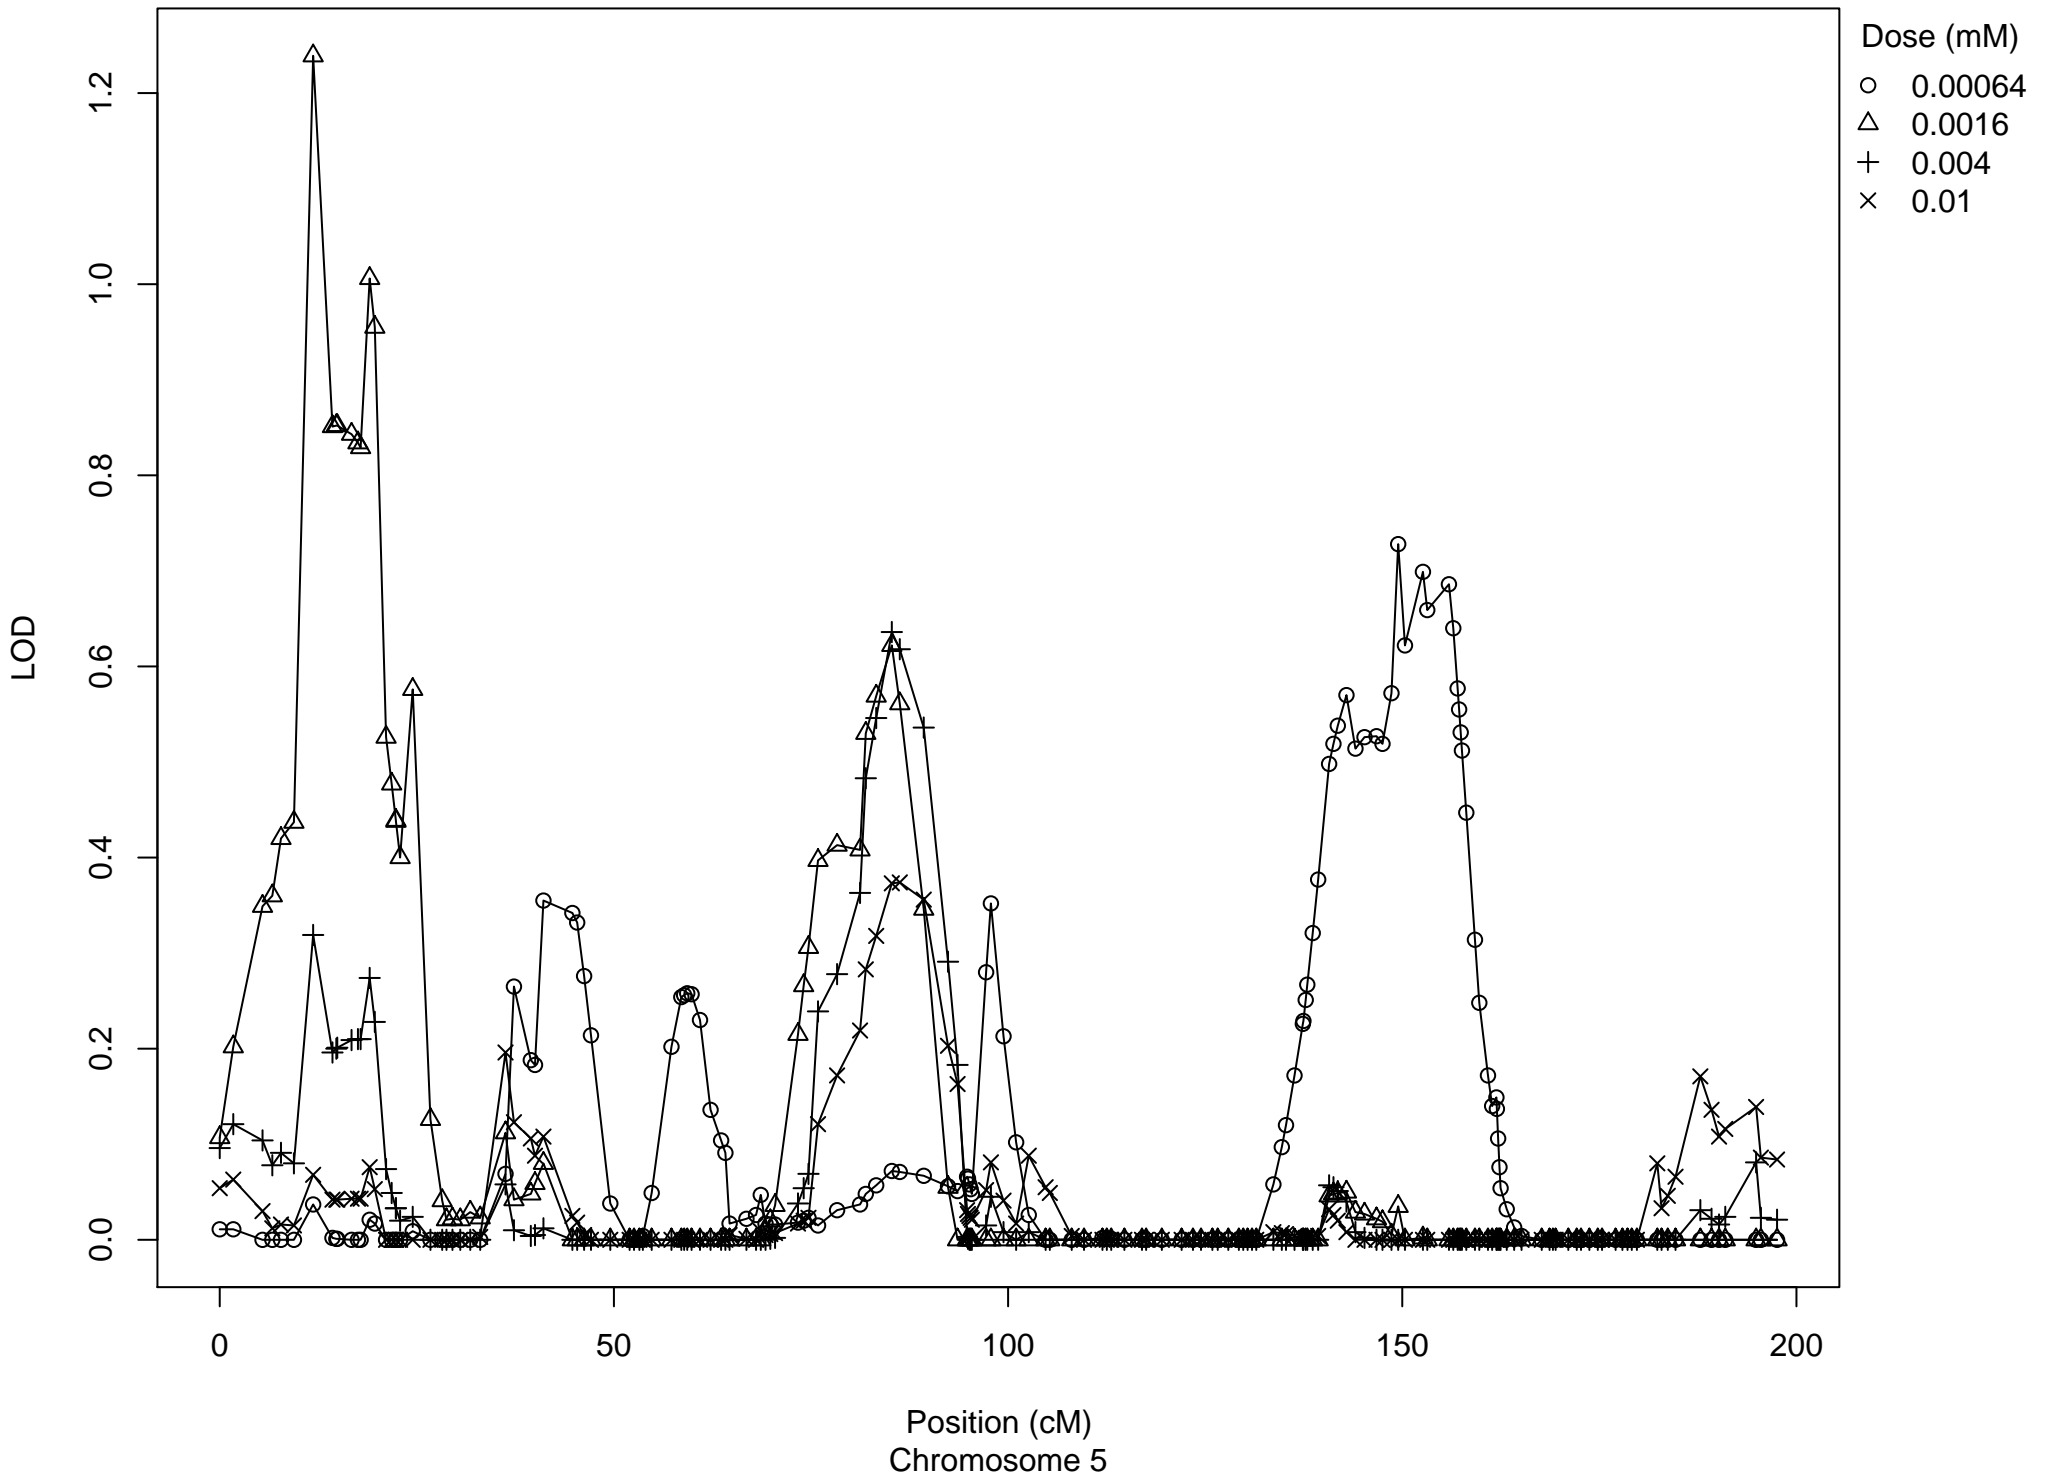

# 2-chloro-2'-deoxyadenosine (Clad)

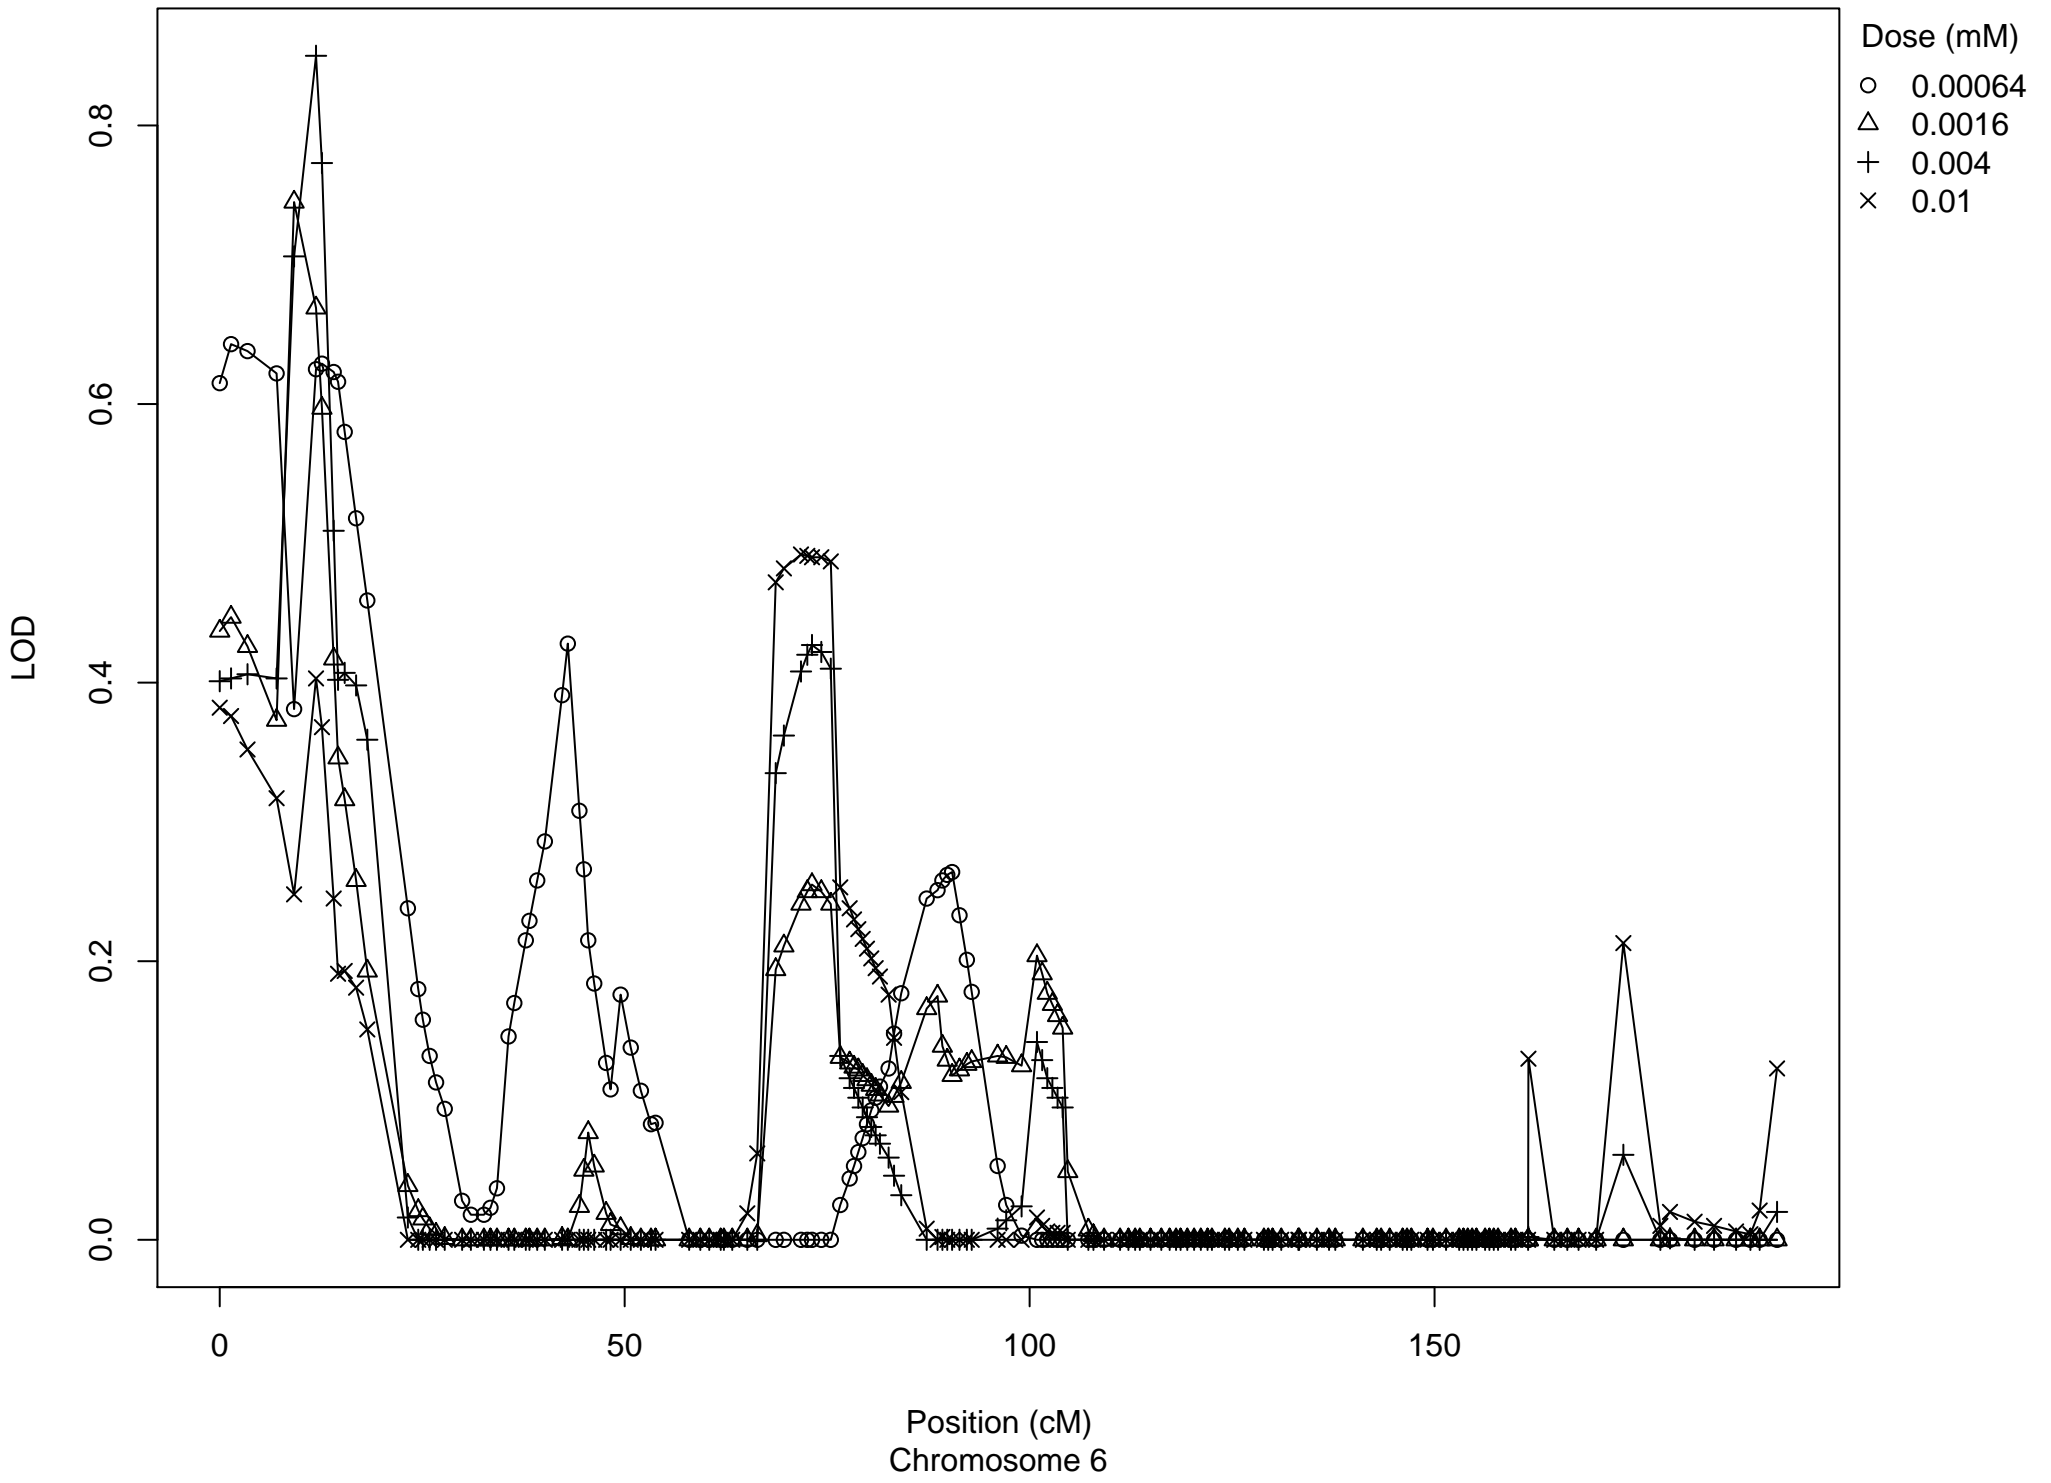

# 2-chloro-2'-deoxyadenosine (Clad)

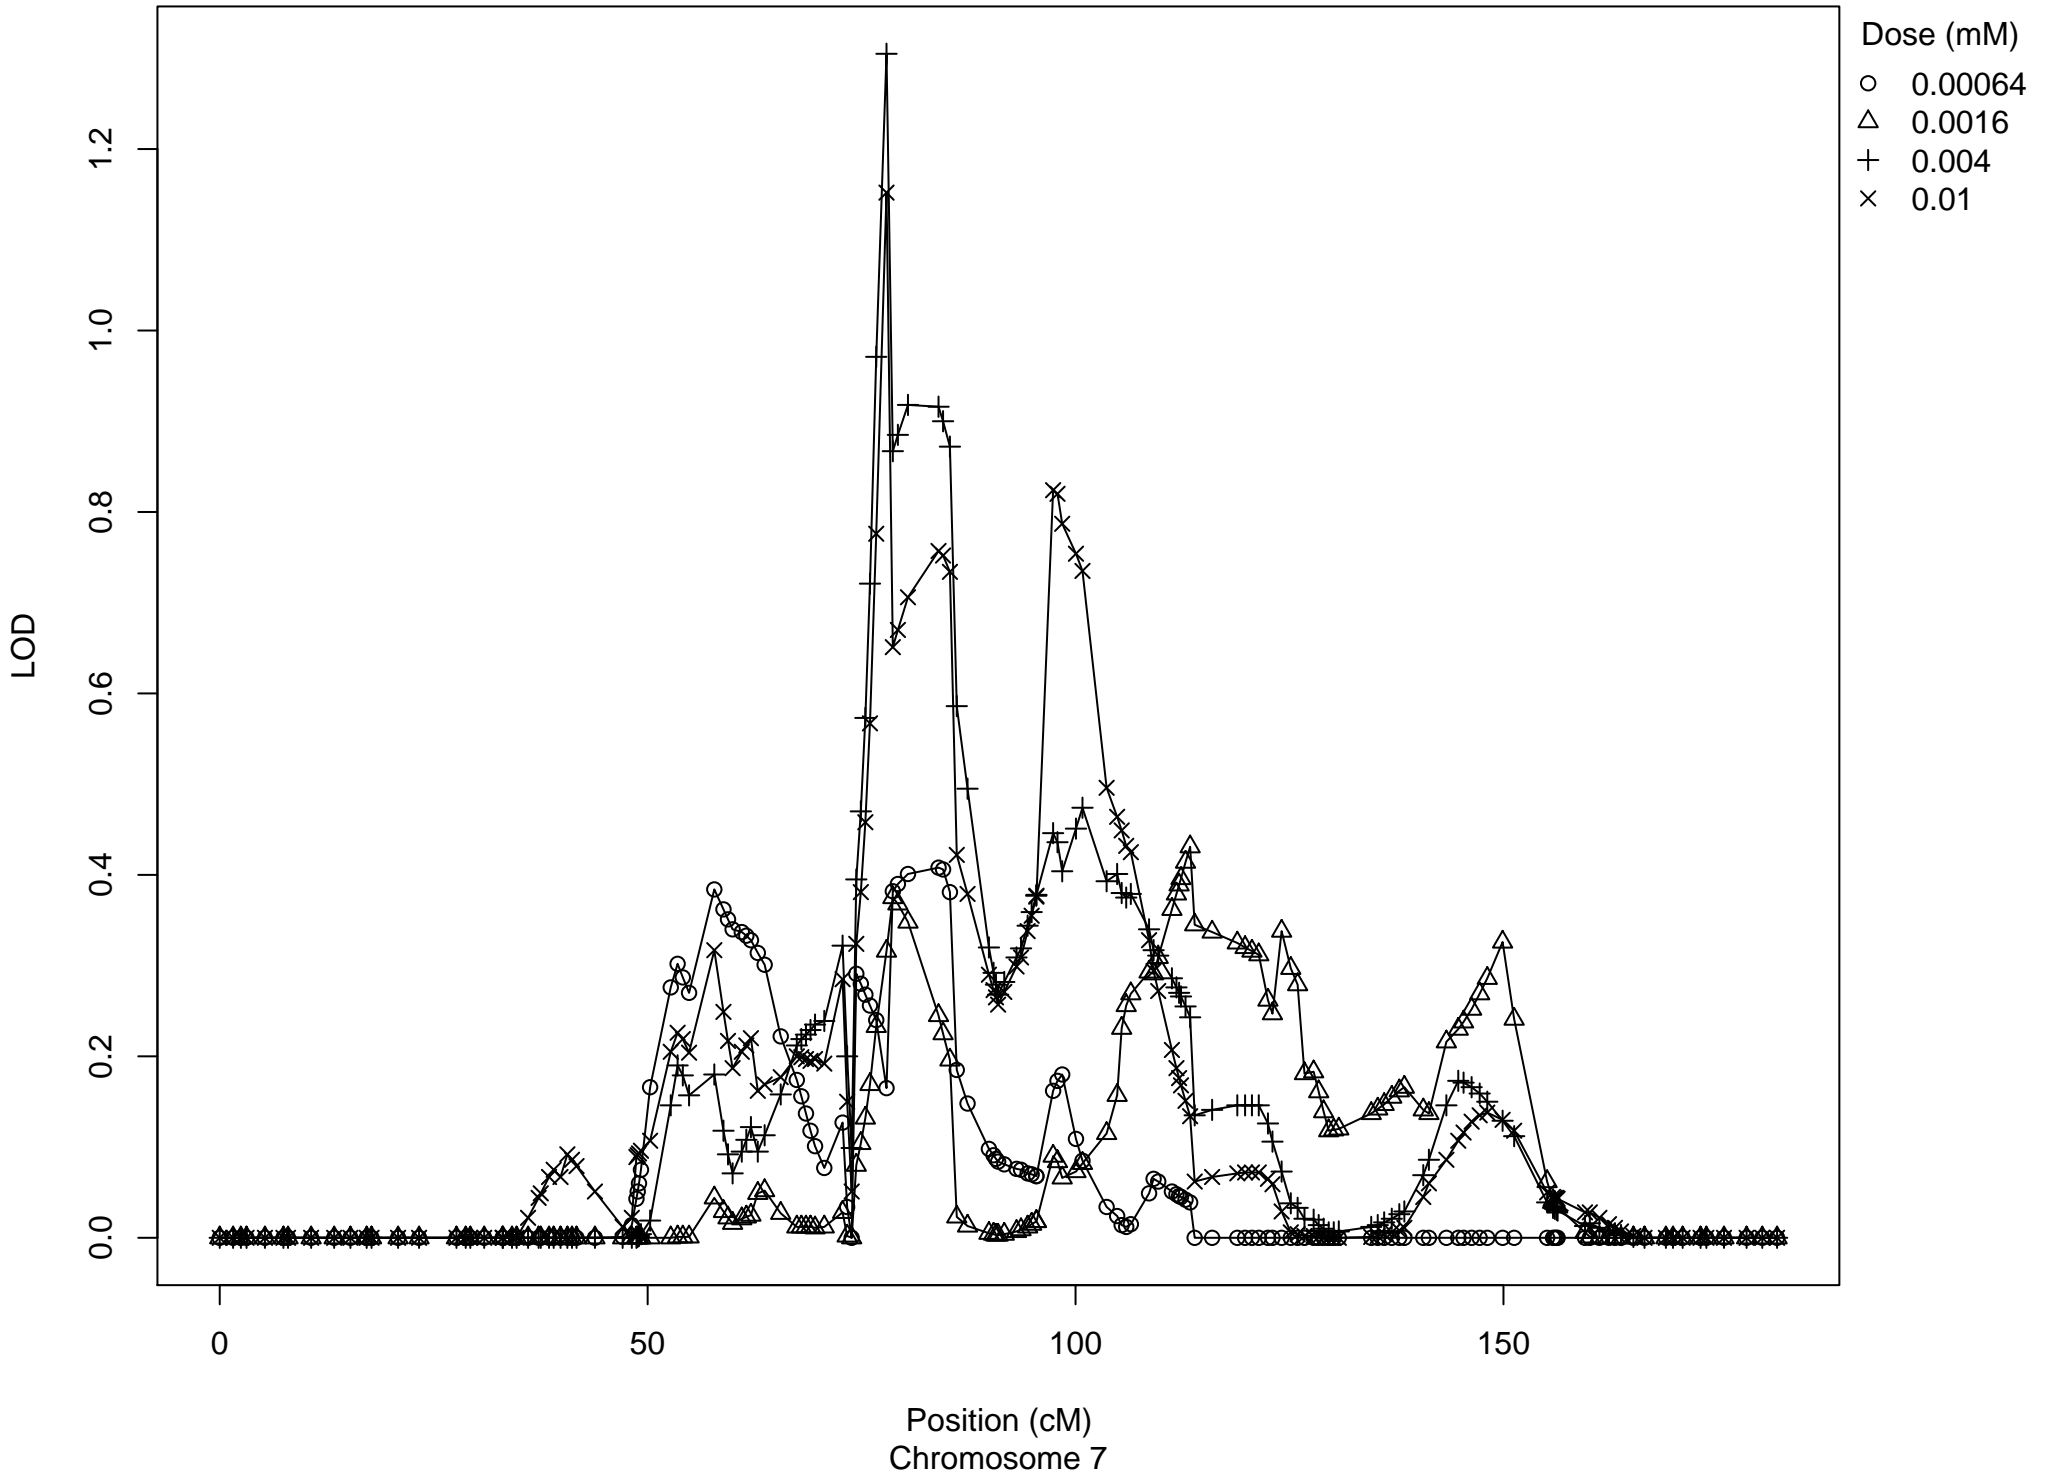

# 2-chloro-2'-deoxyadenosine (Clad)

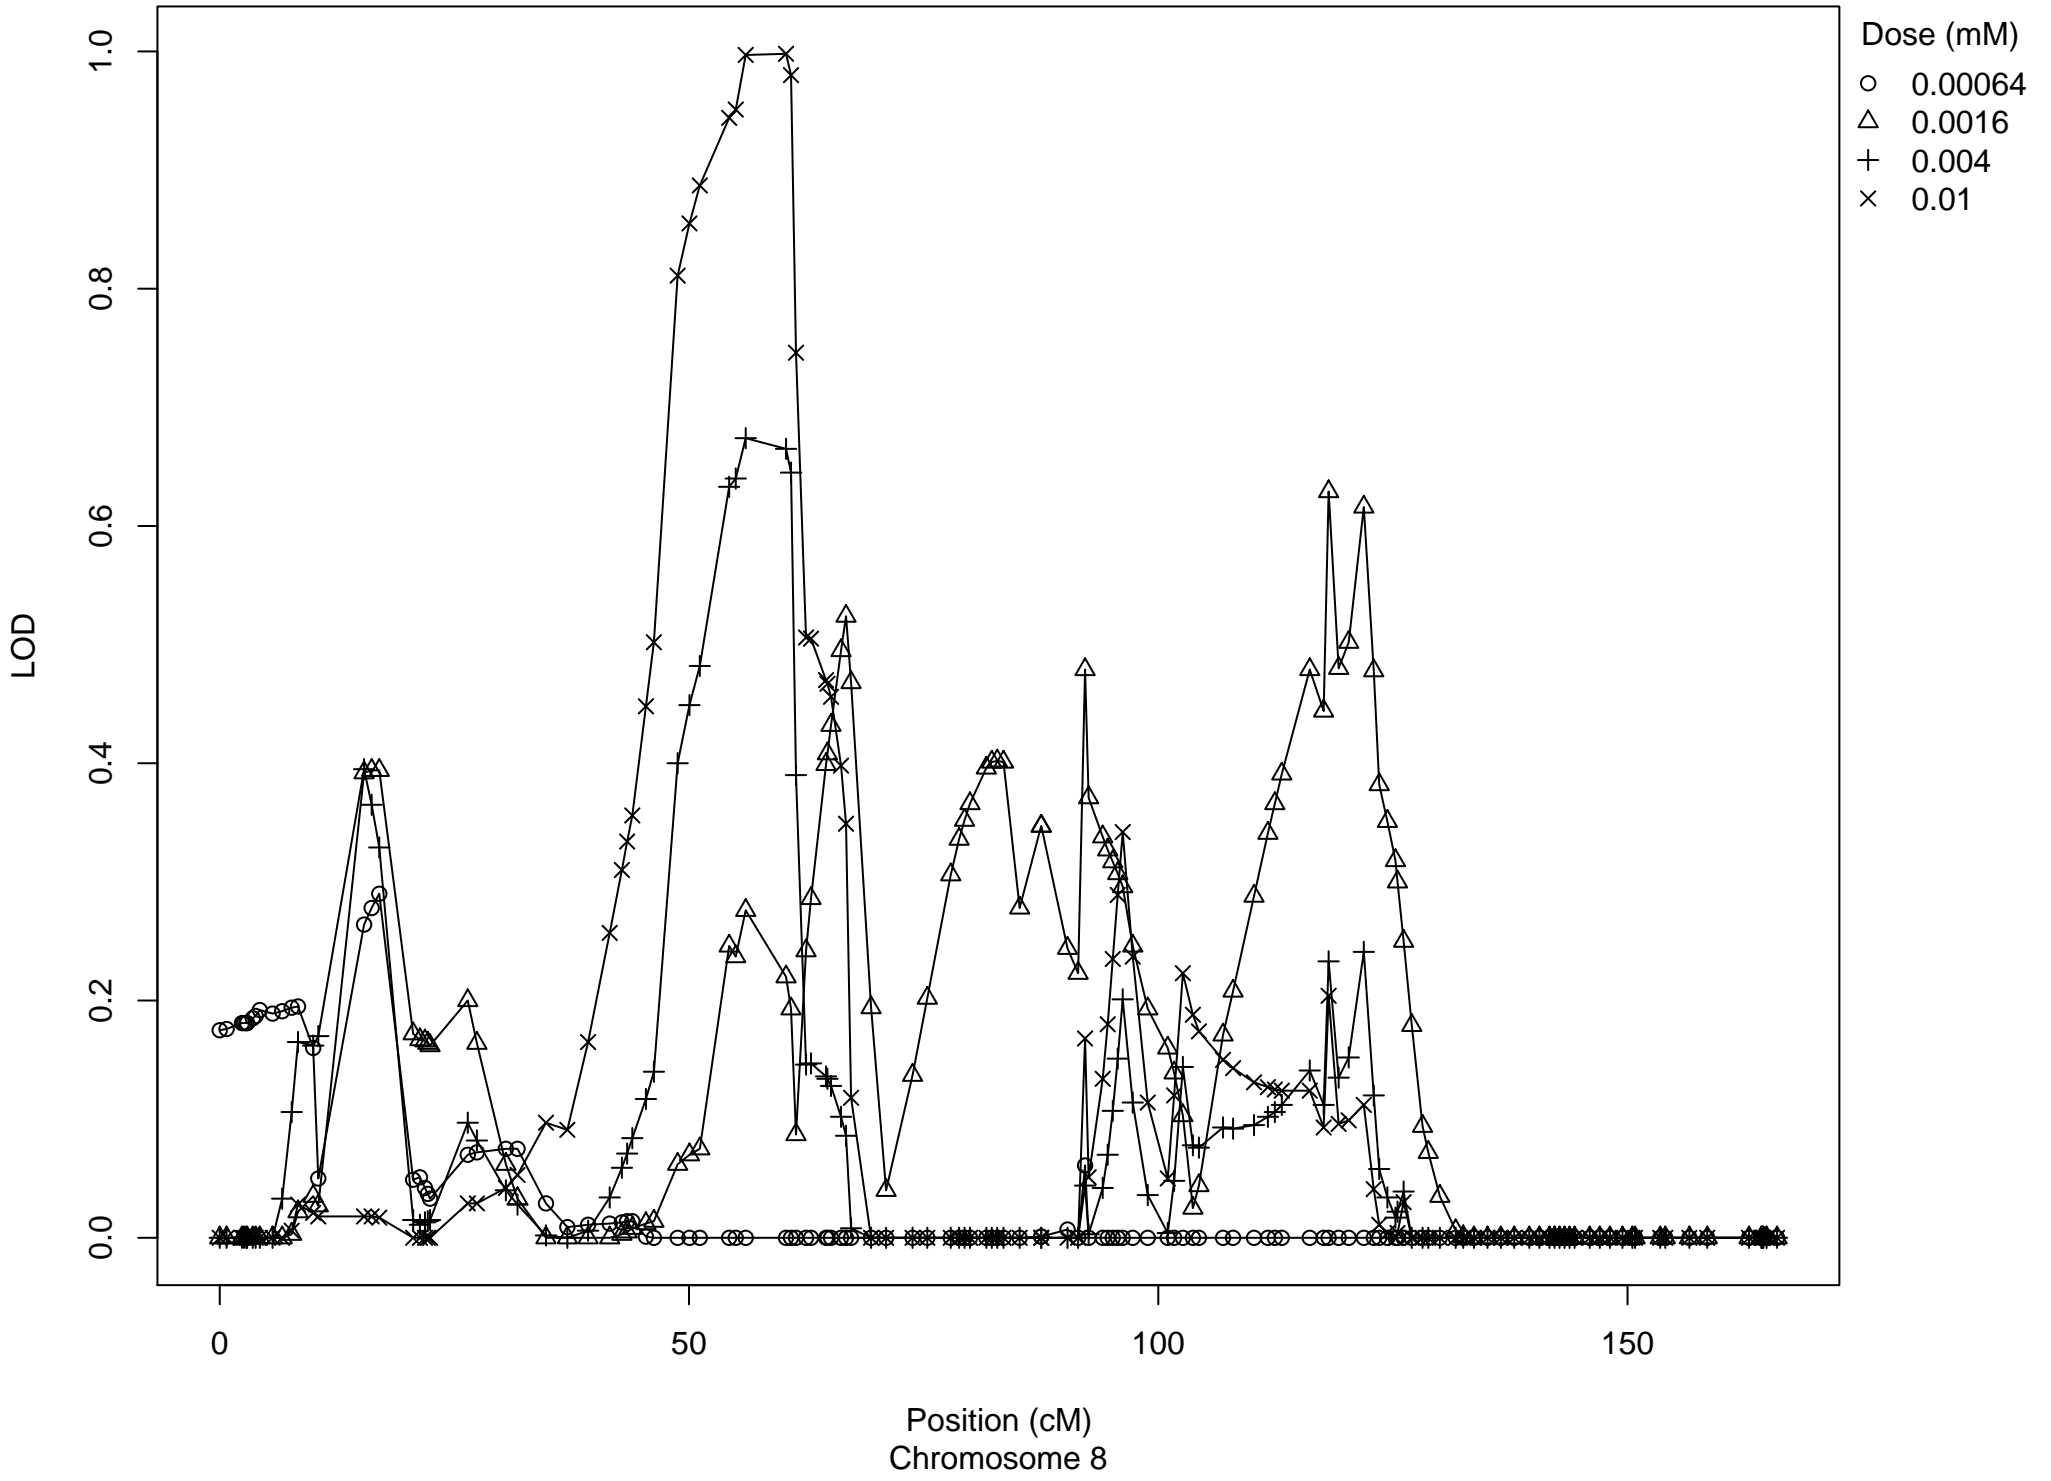



# 2-chloro-2'-deoxyadenosine (Clad)

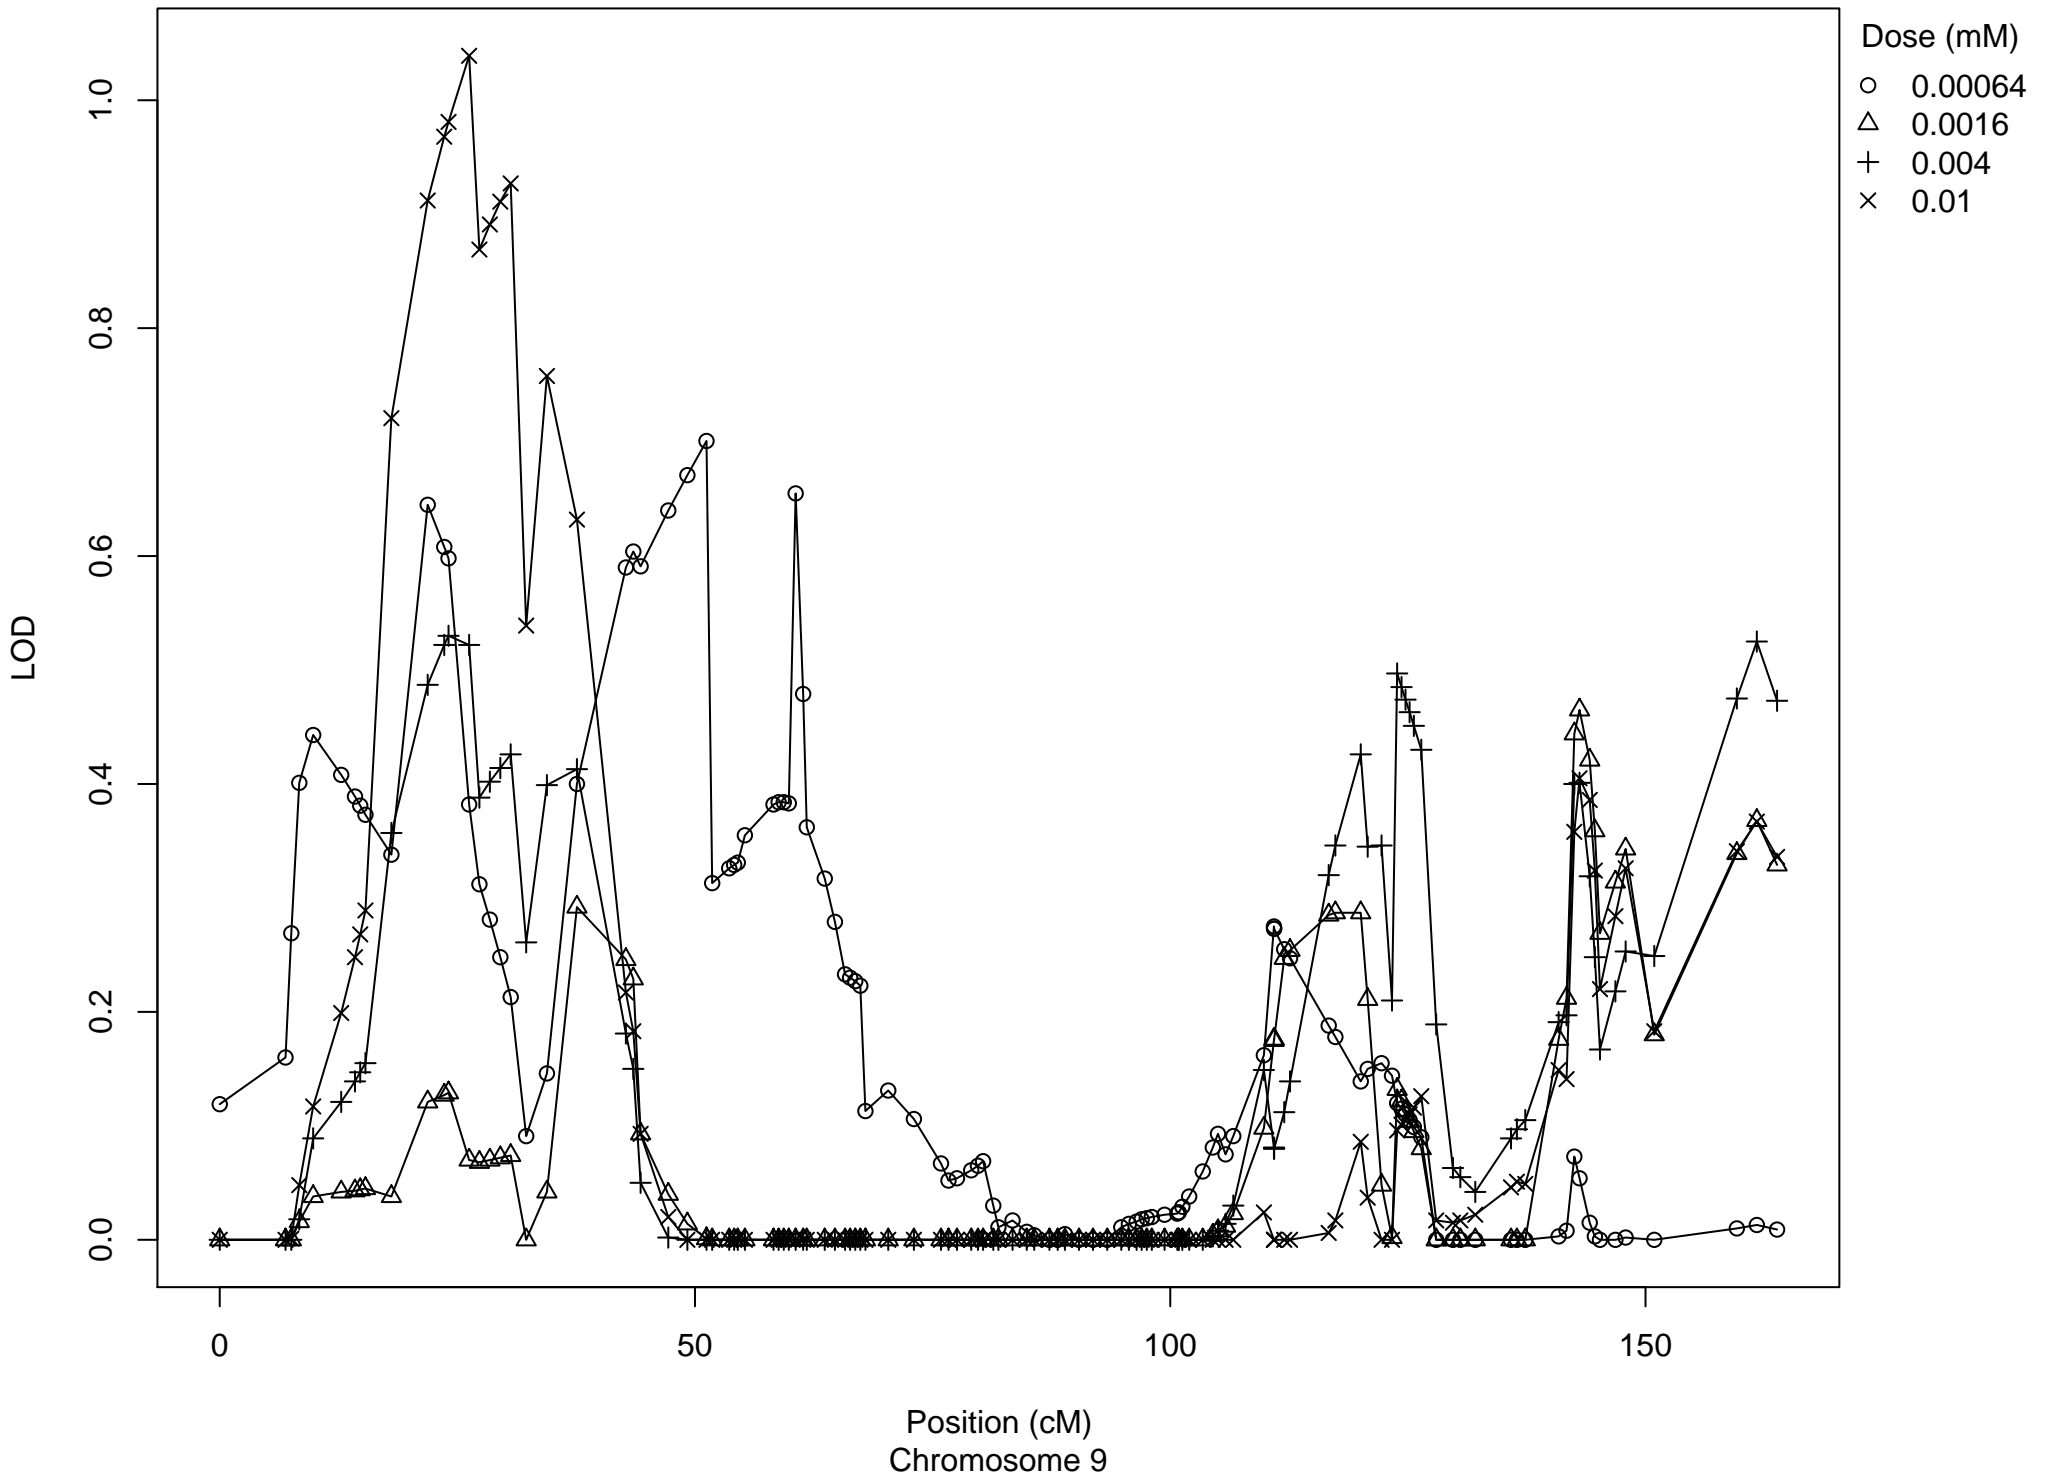

# 2-chloro-2'-deoxyadenosine (Clad)

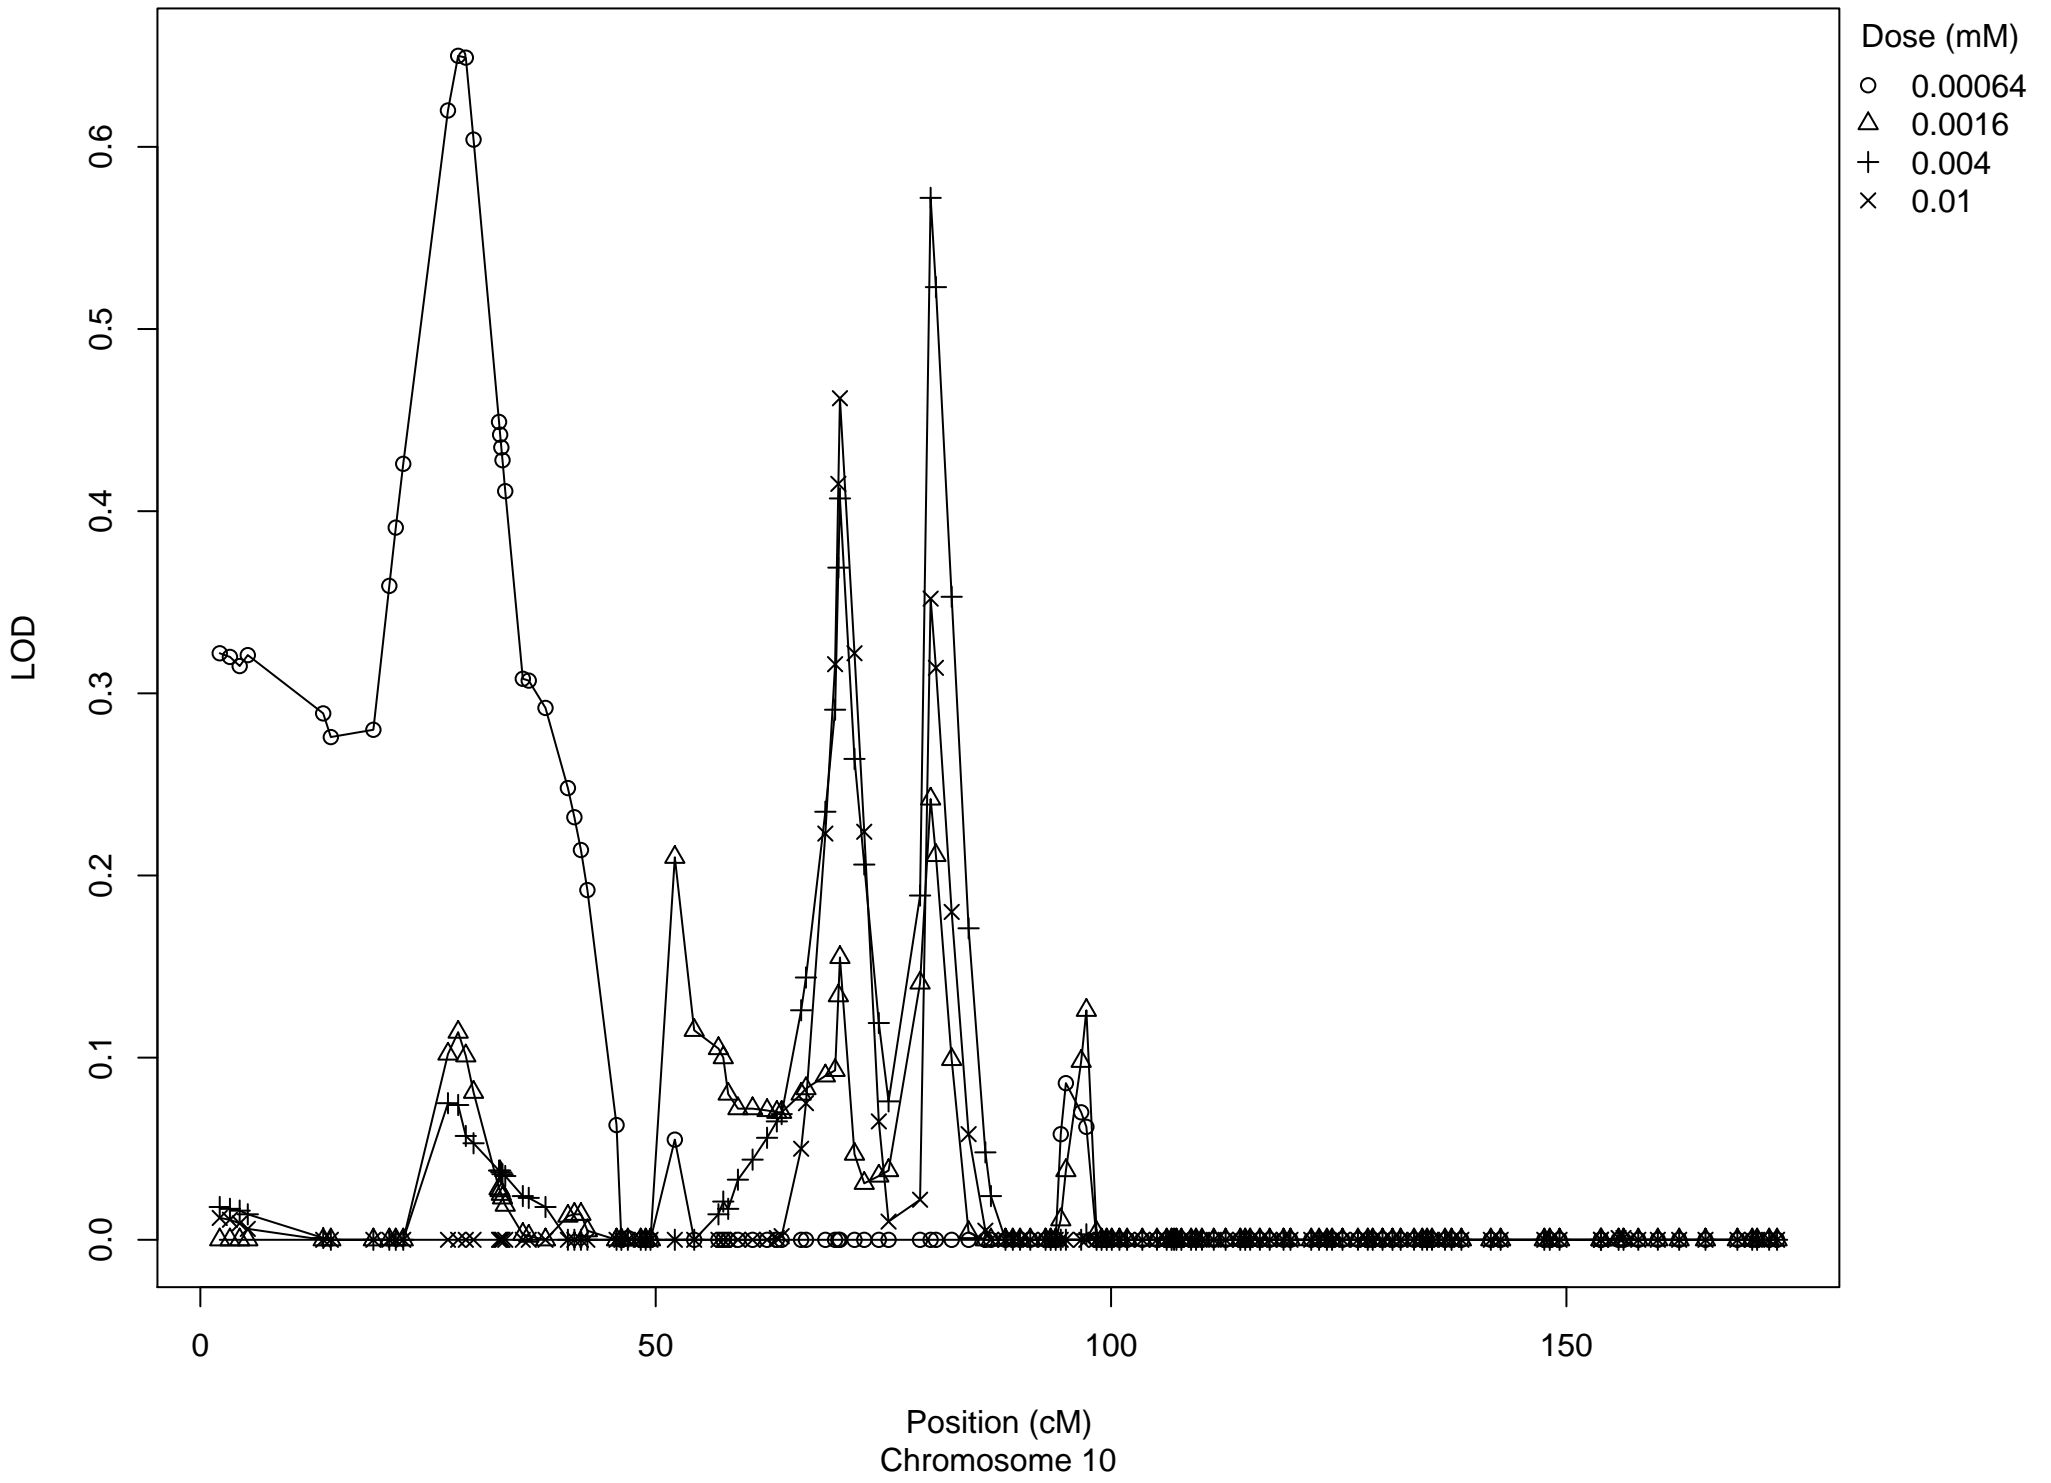

# 2-chloro-2'-deoxyadenosine (Clad)

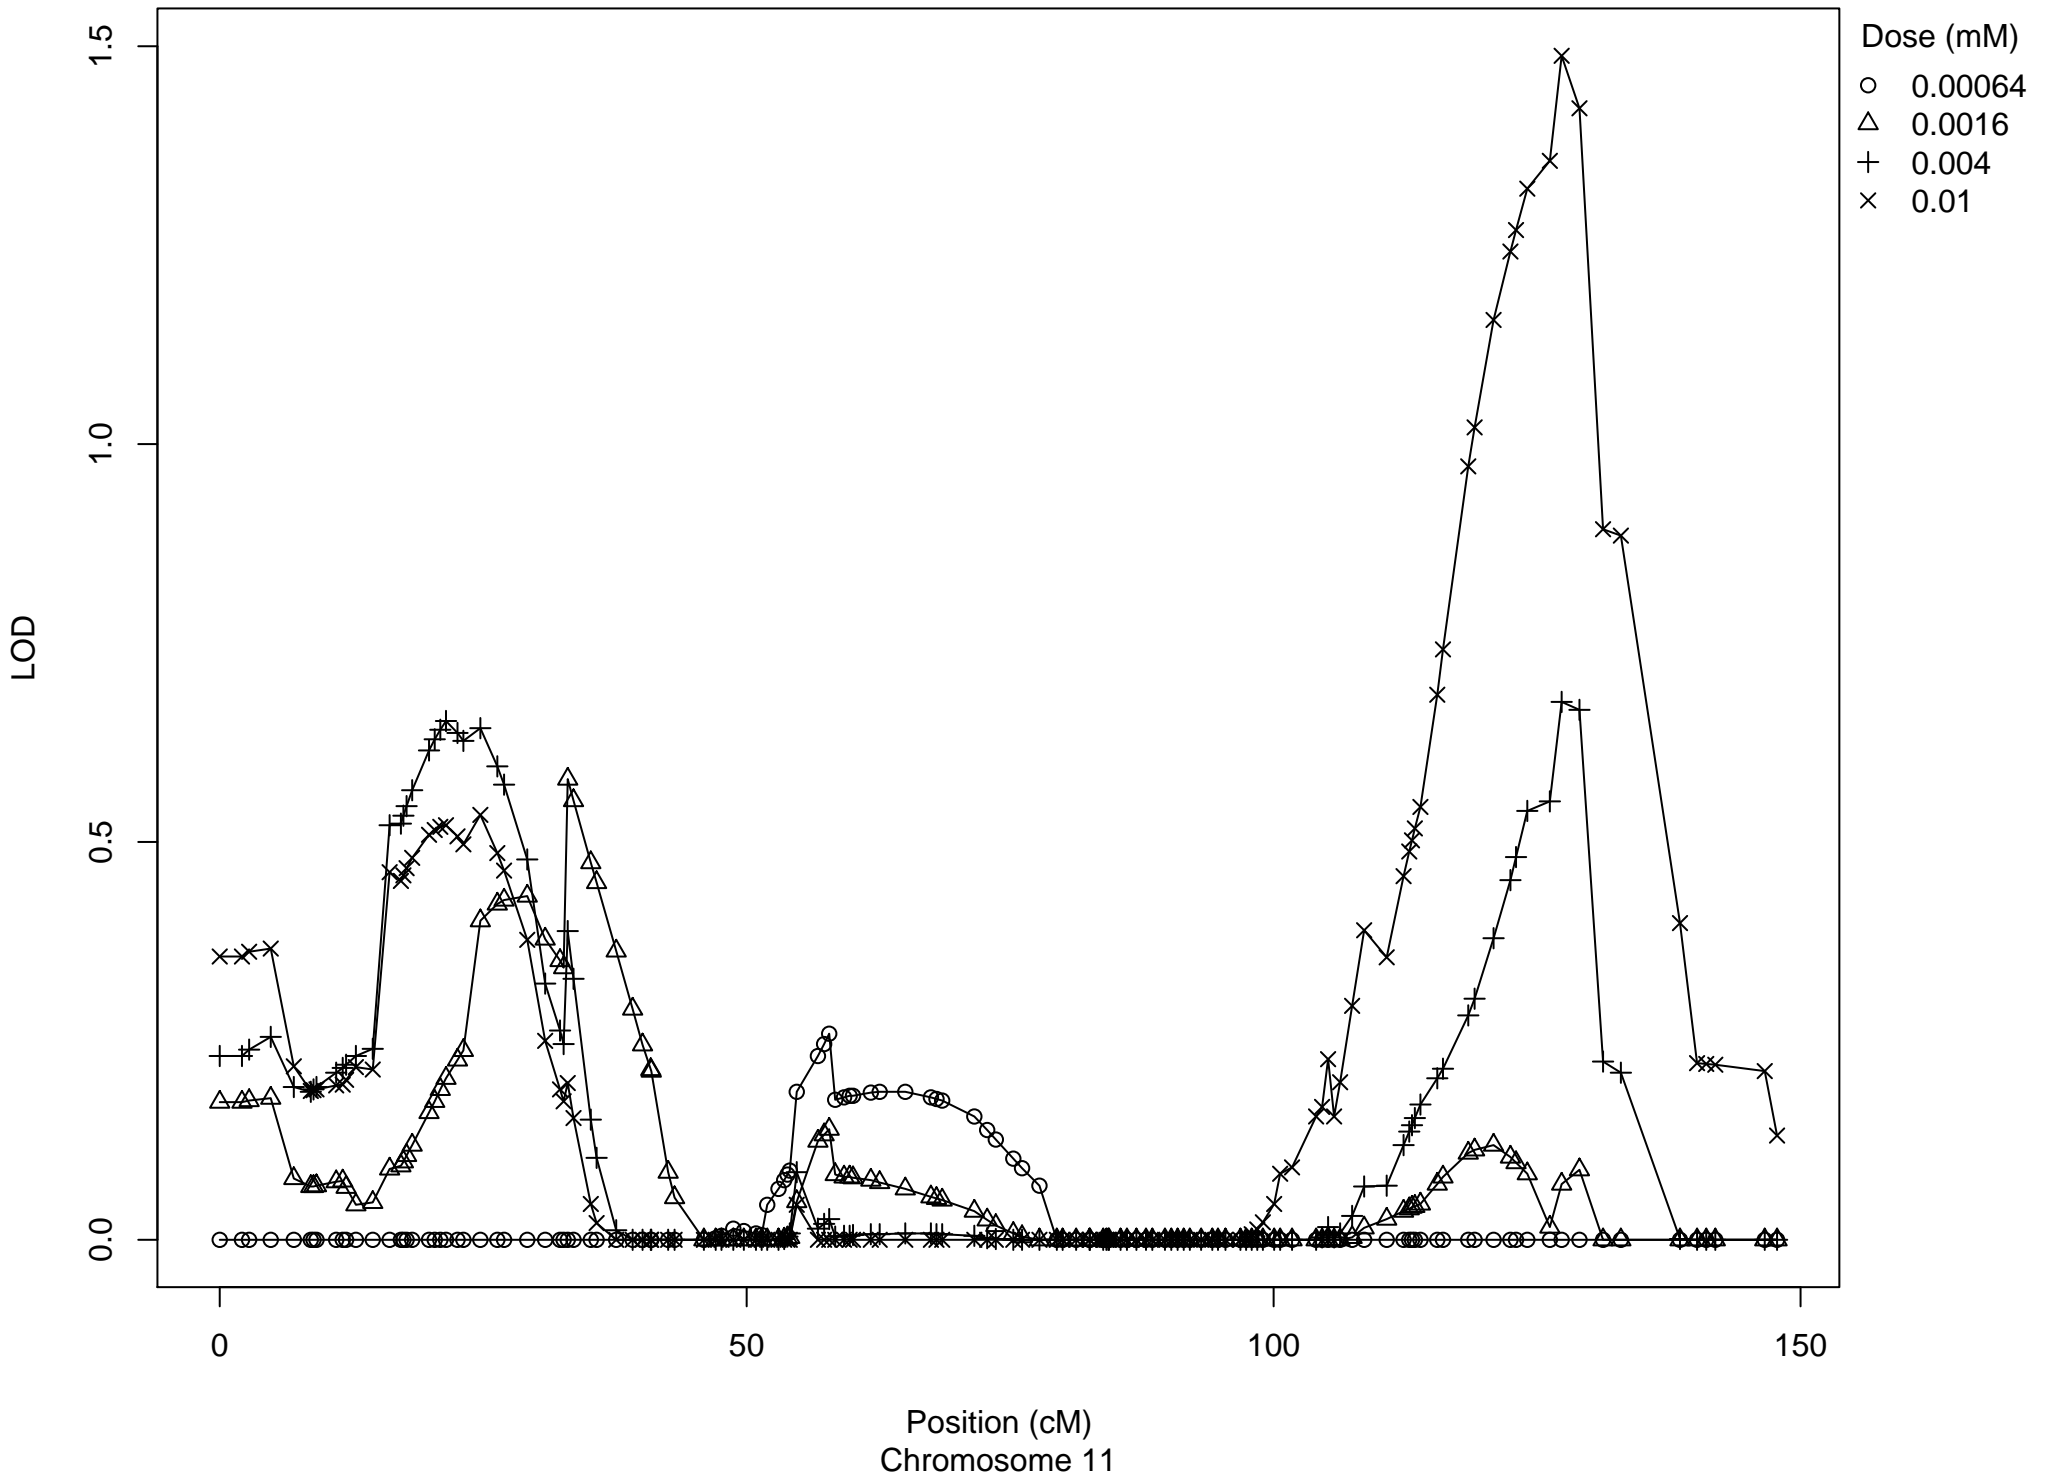

# 2-chloro-2'-deoxyadenosine (Clad)

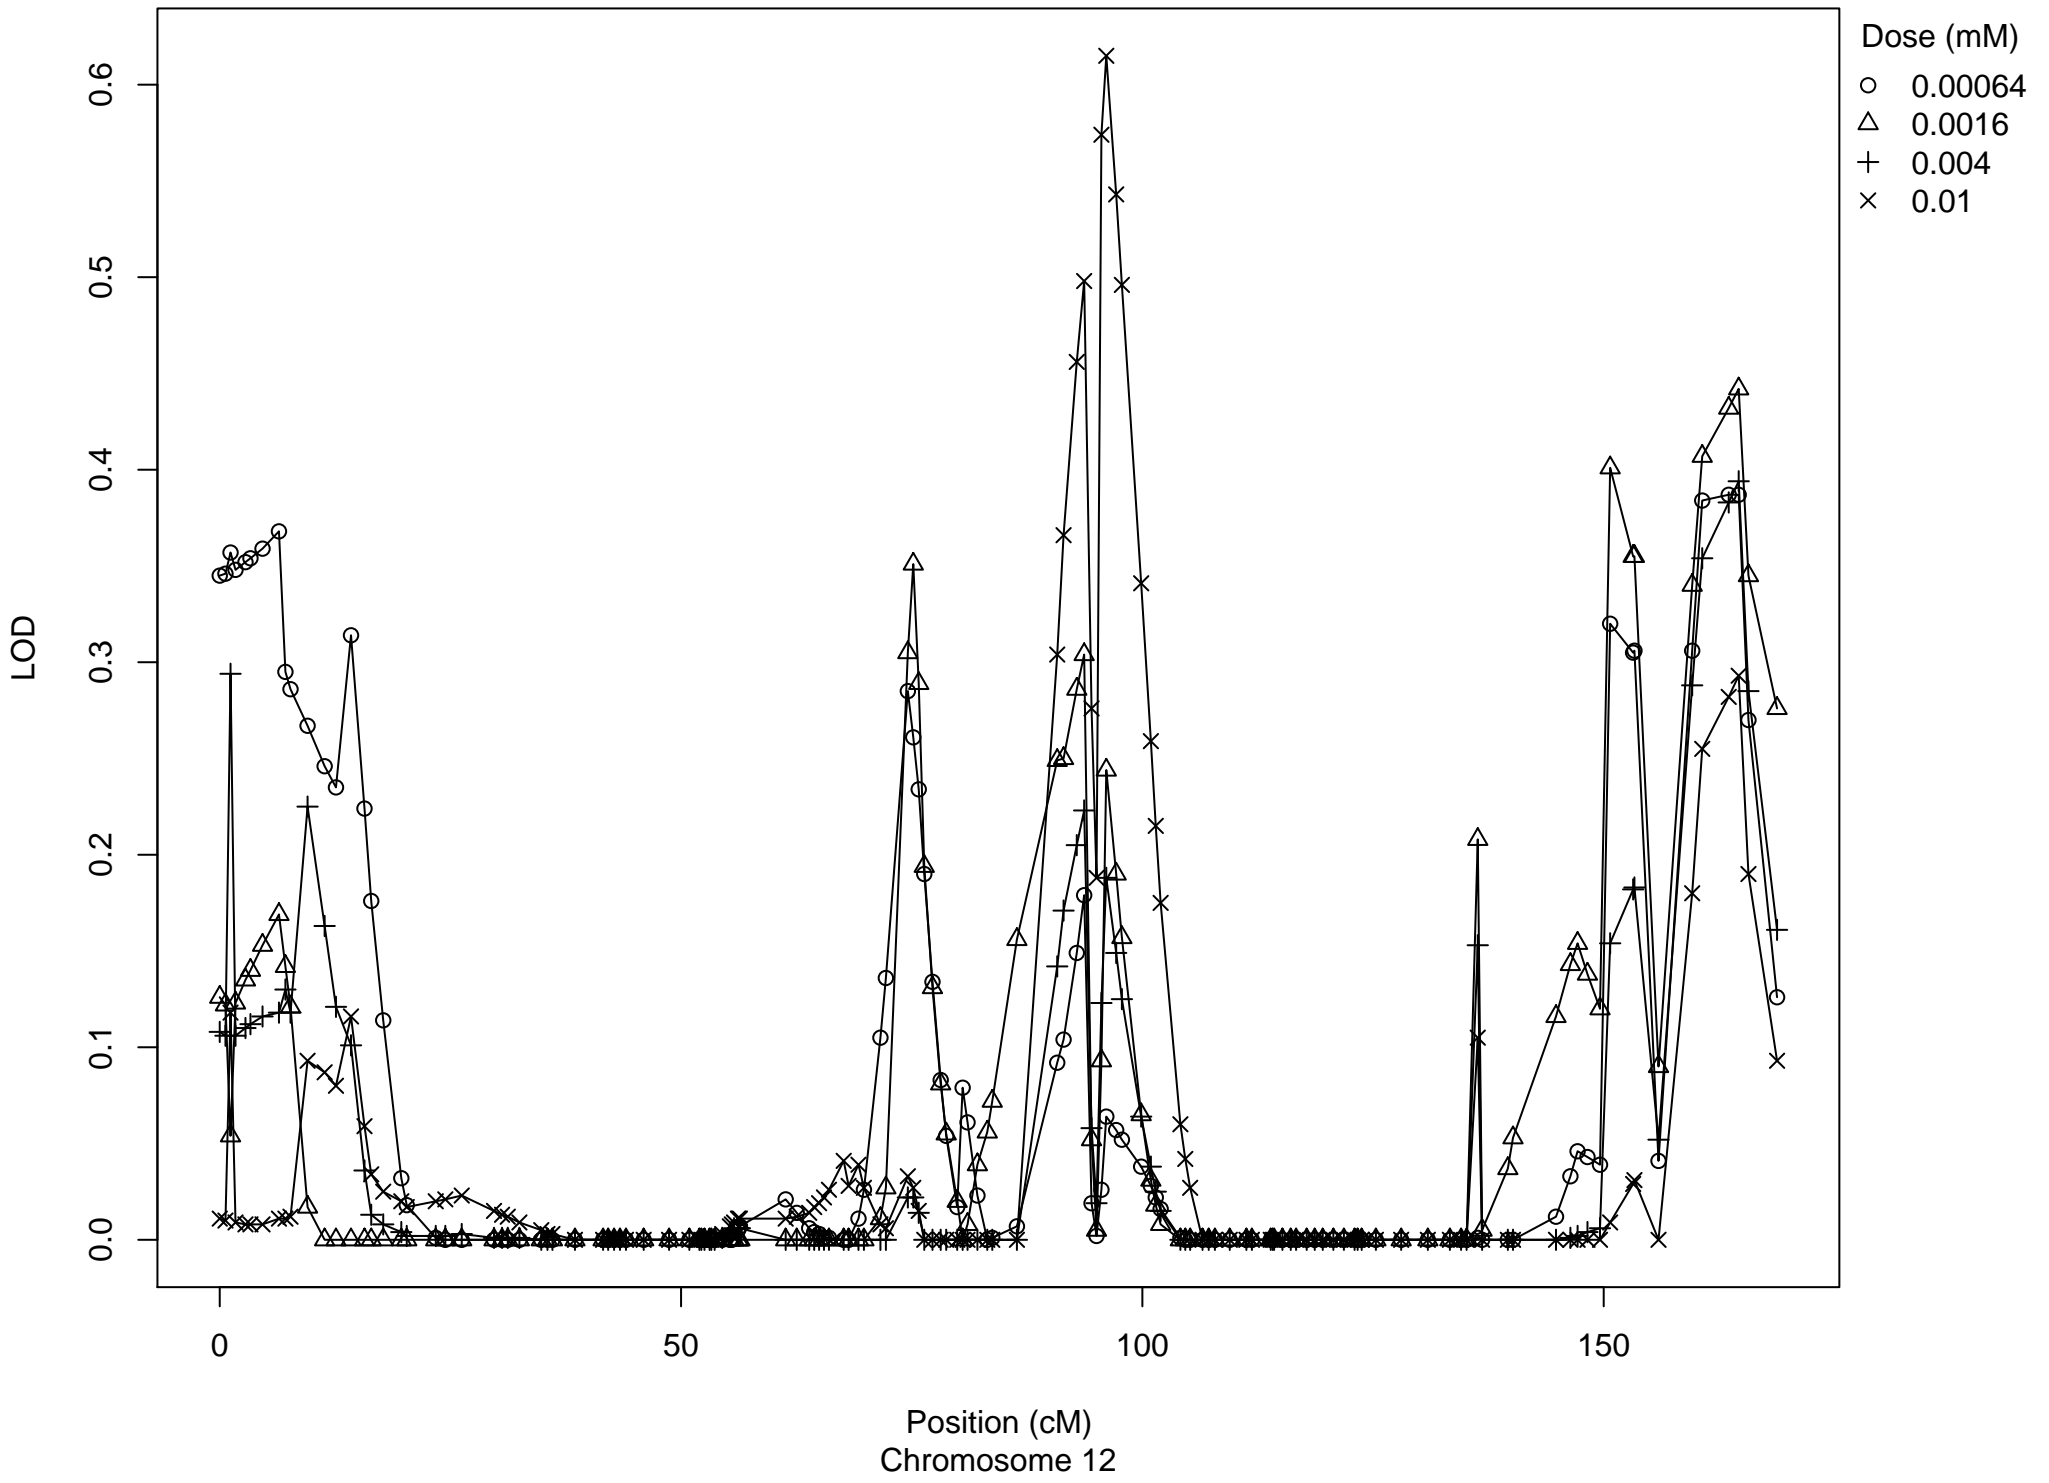

# 2-chloro-2'-deoxyadenosine (Clad)

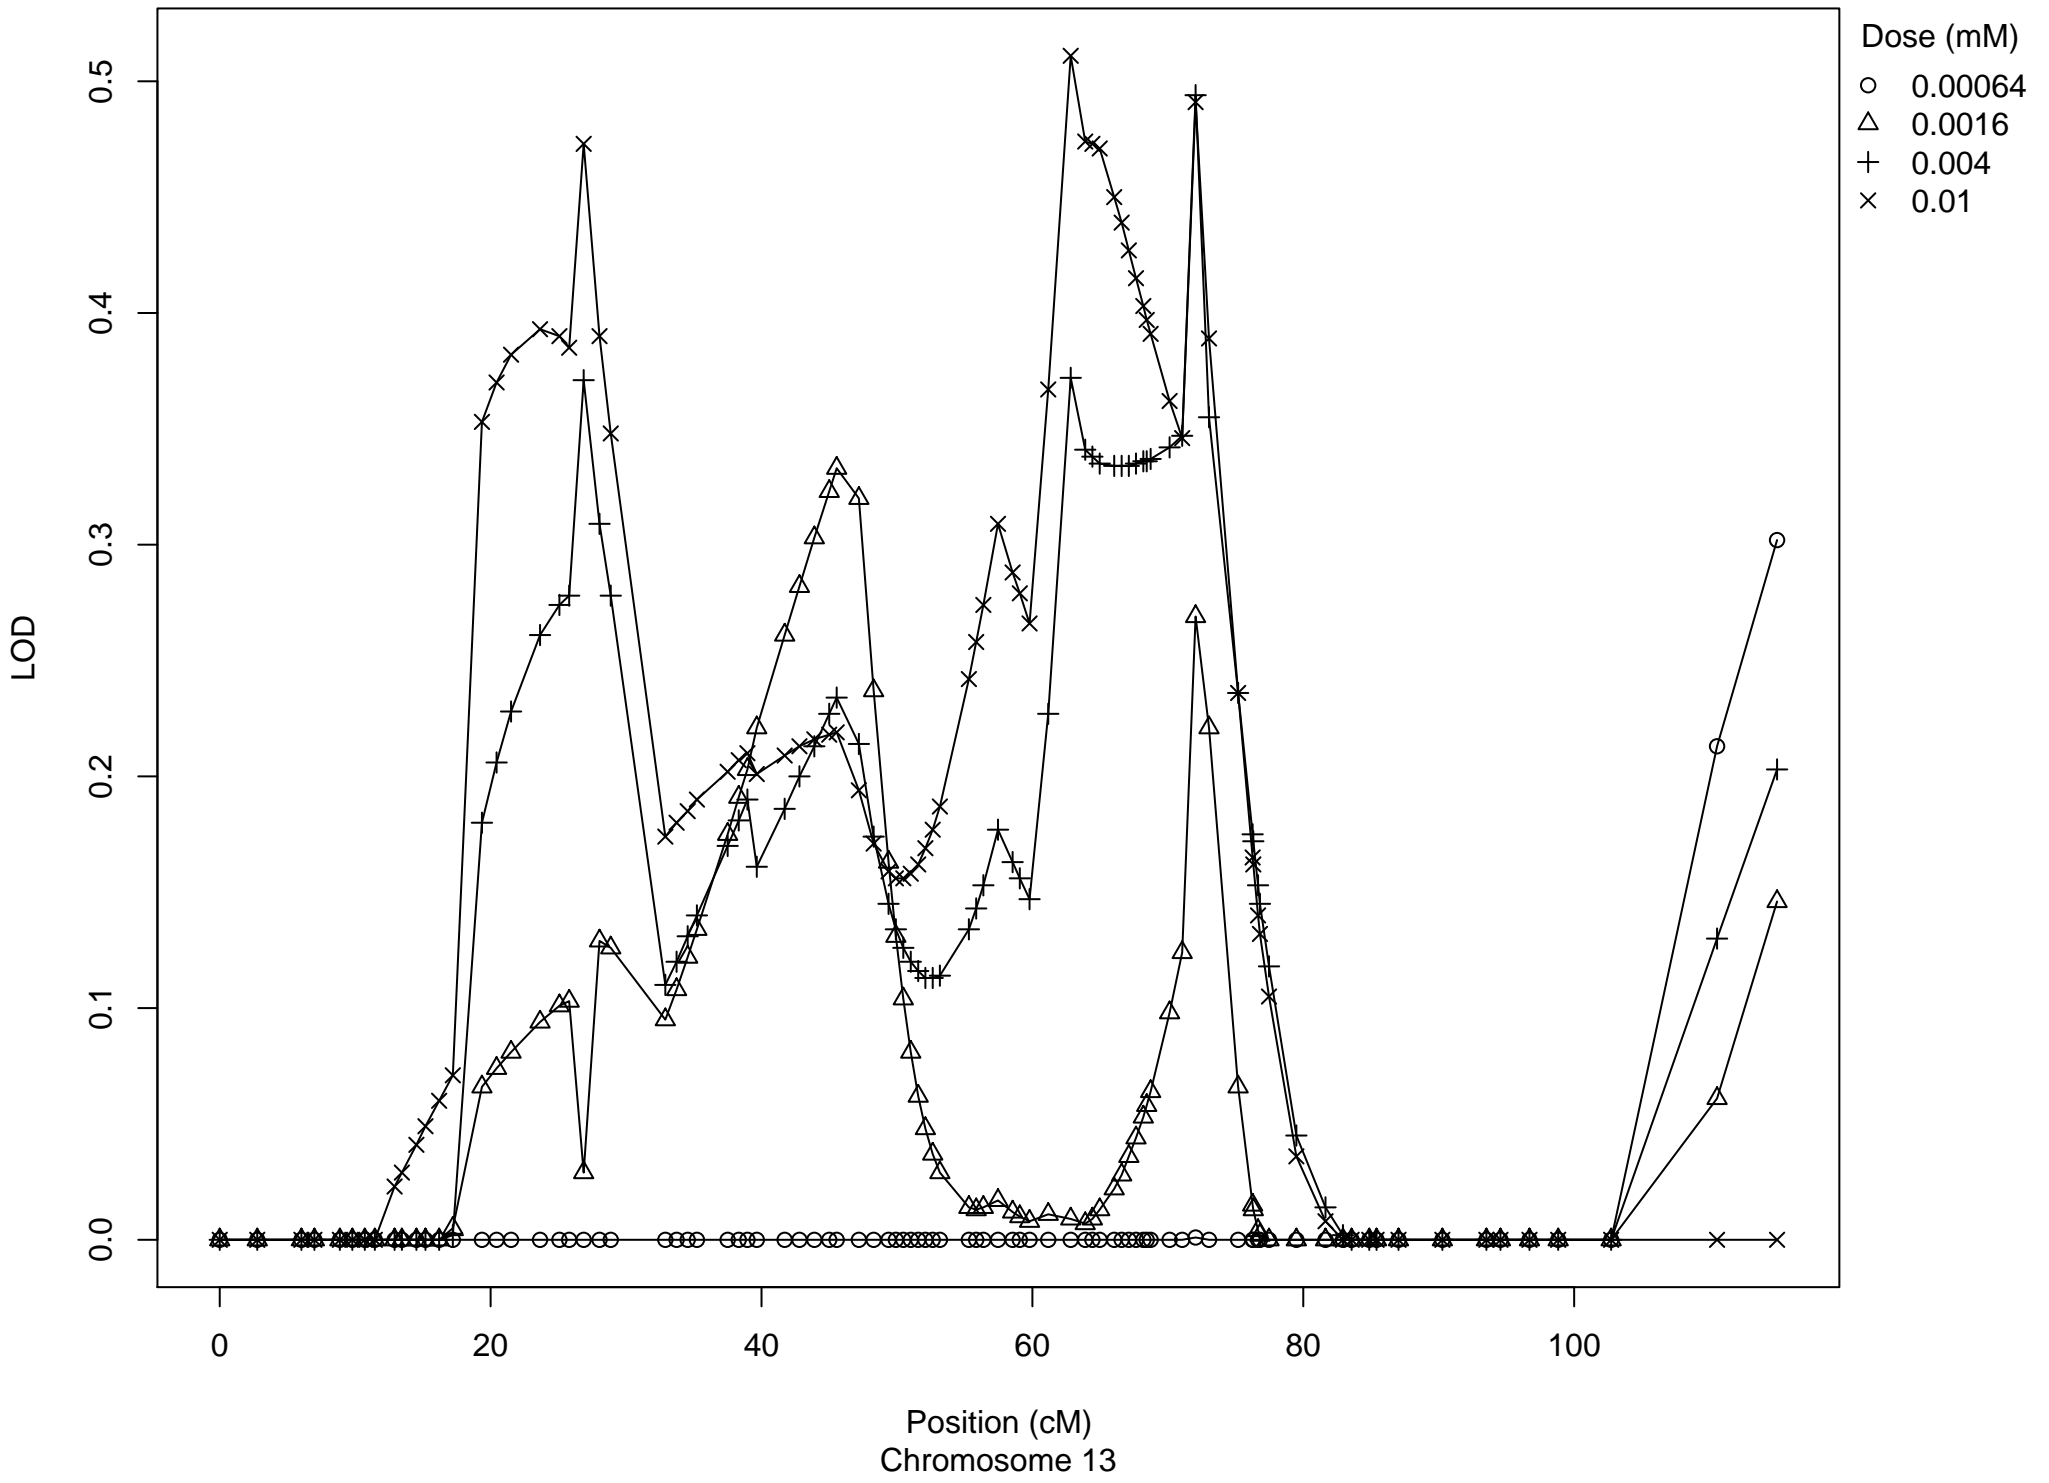

# 2-chloro-2'-deoxyadenosine (Clad)

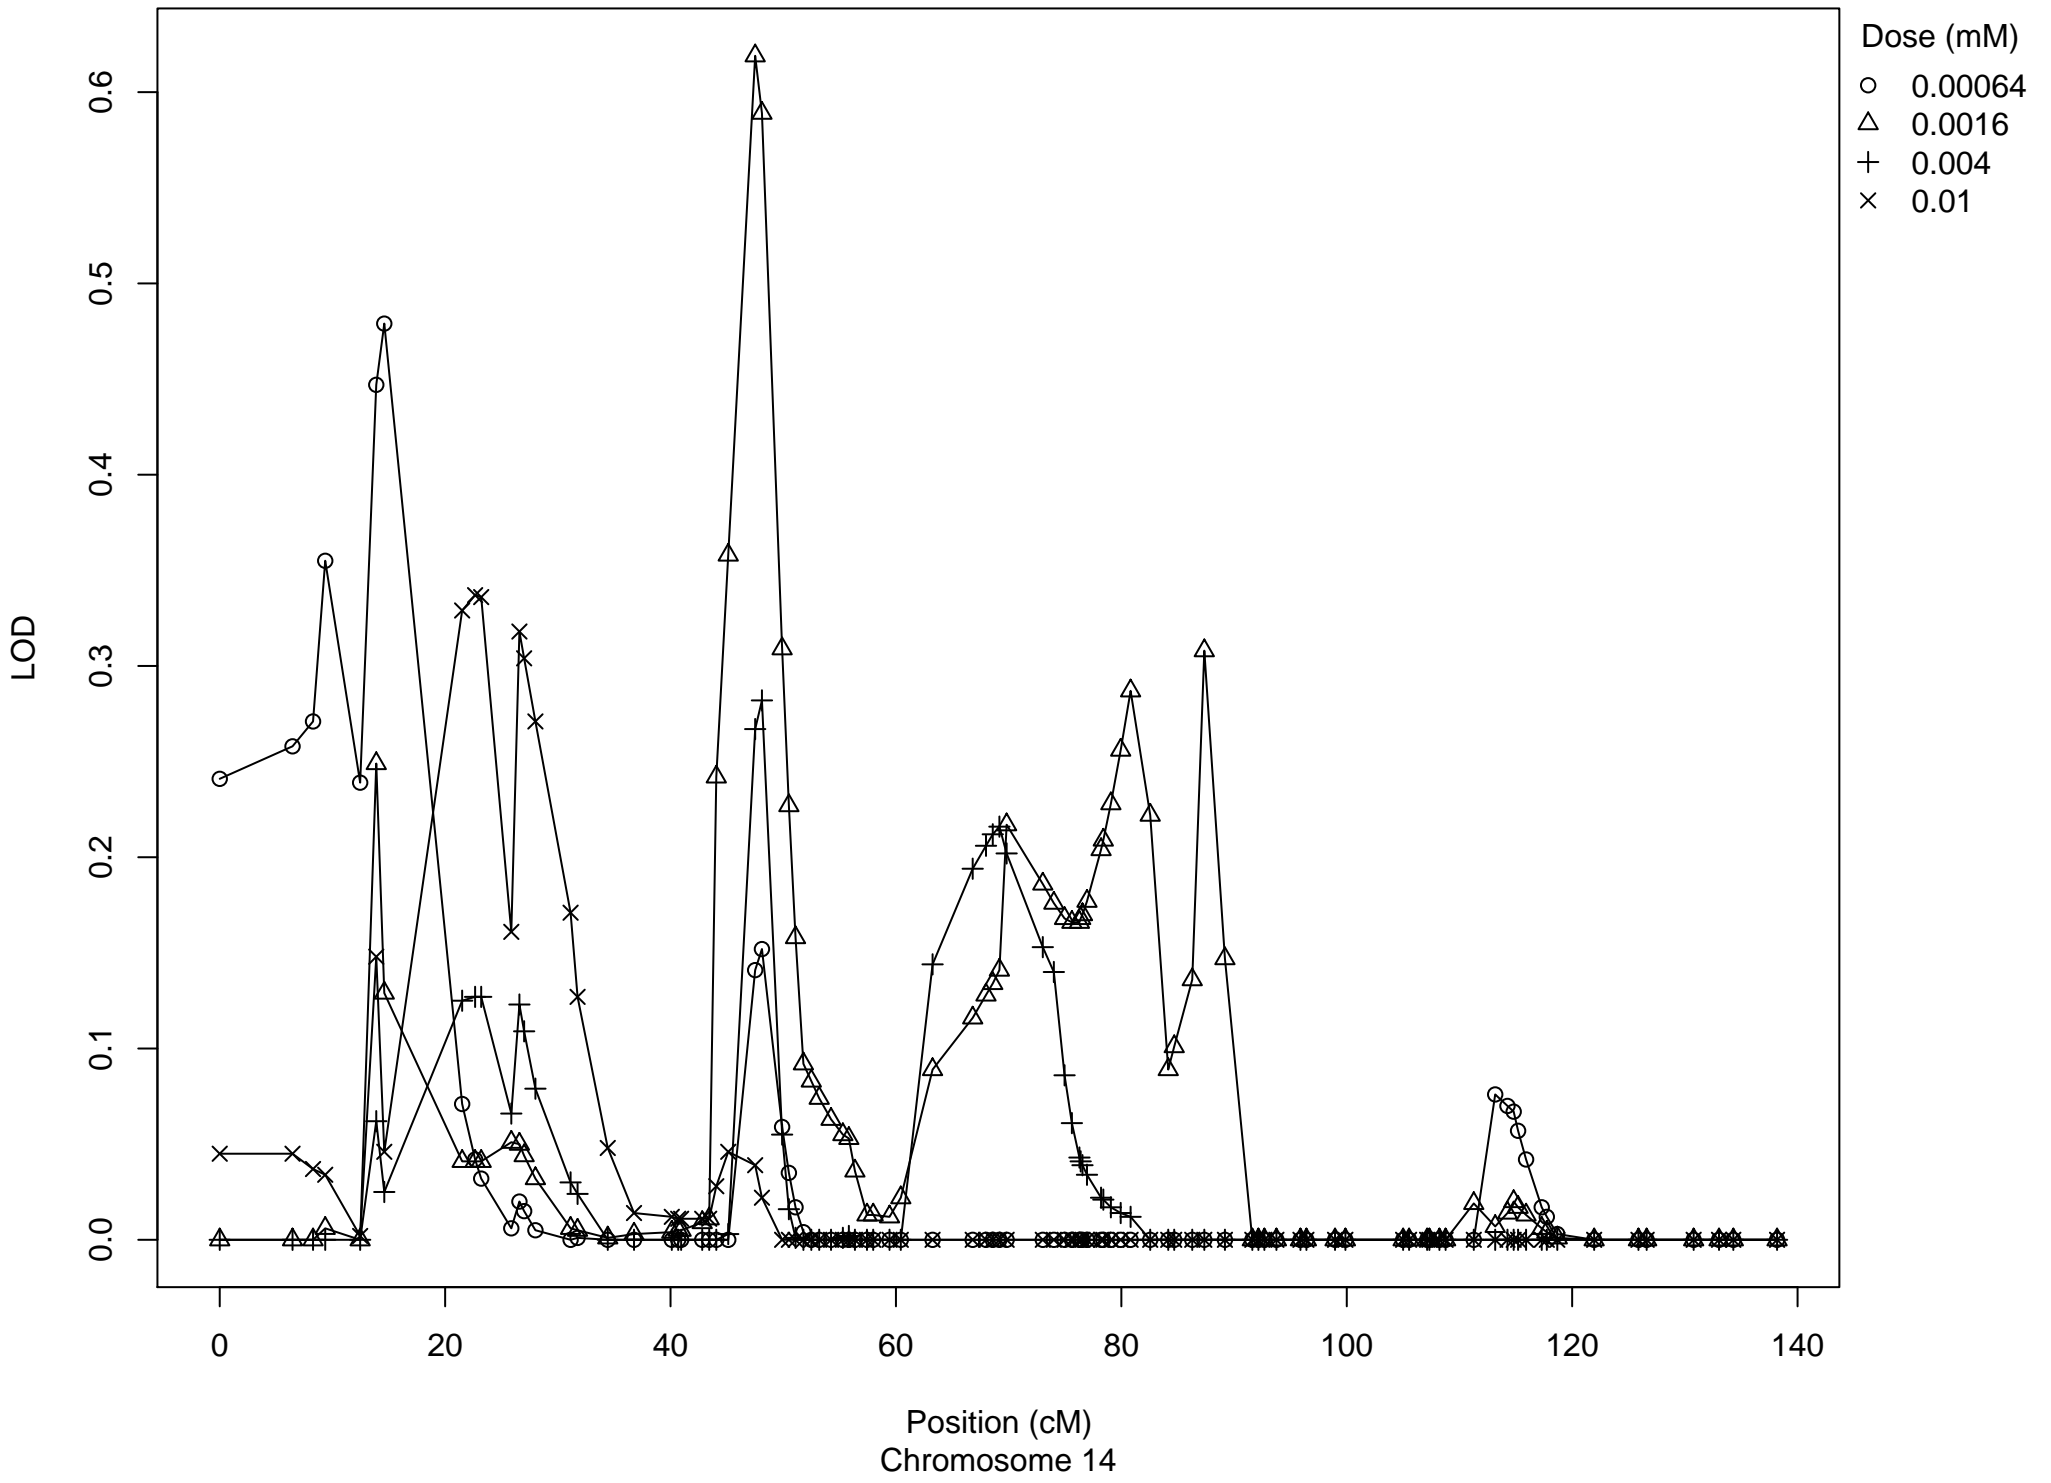

# 2-chloro-2'-deoxyadenosine (Clad)

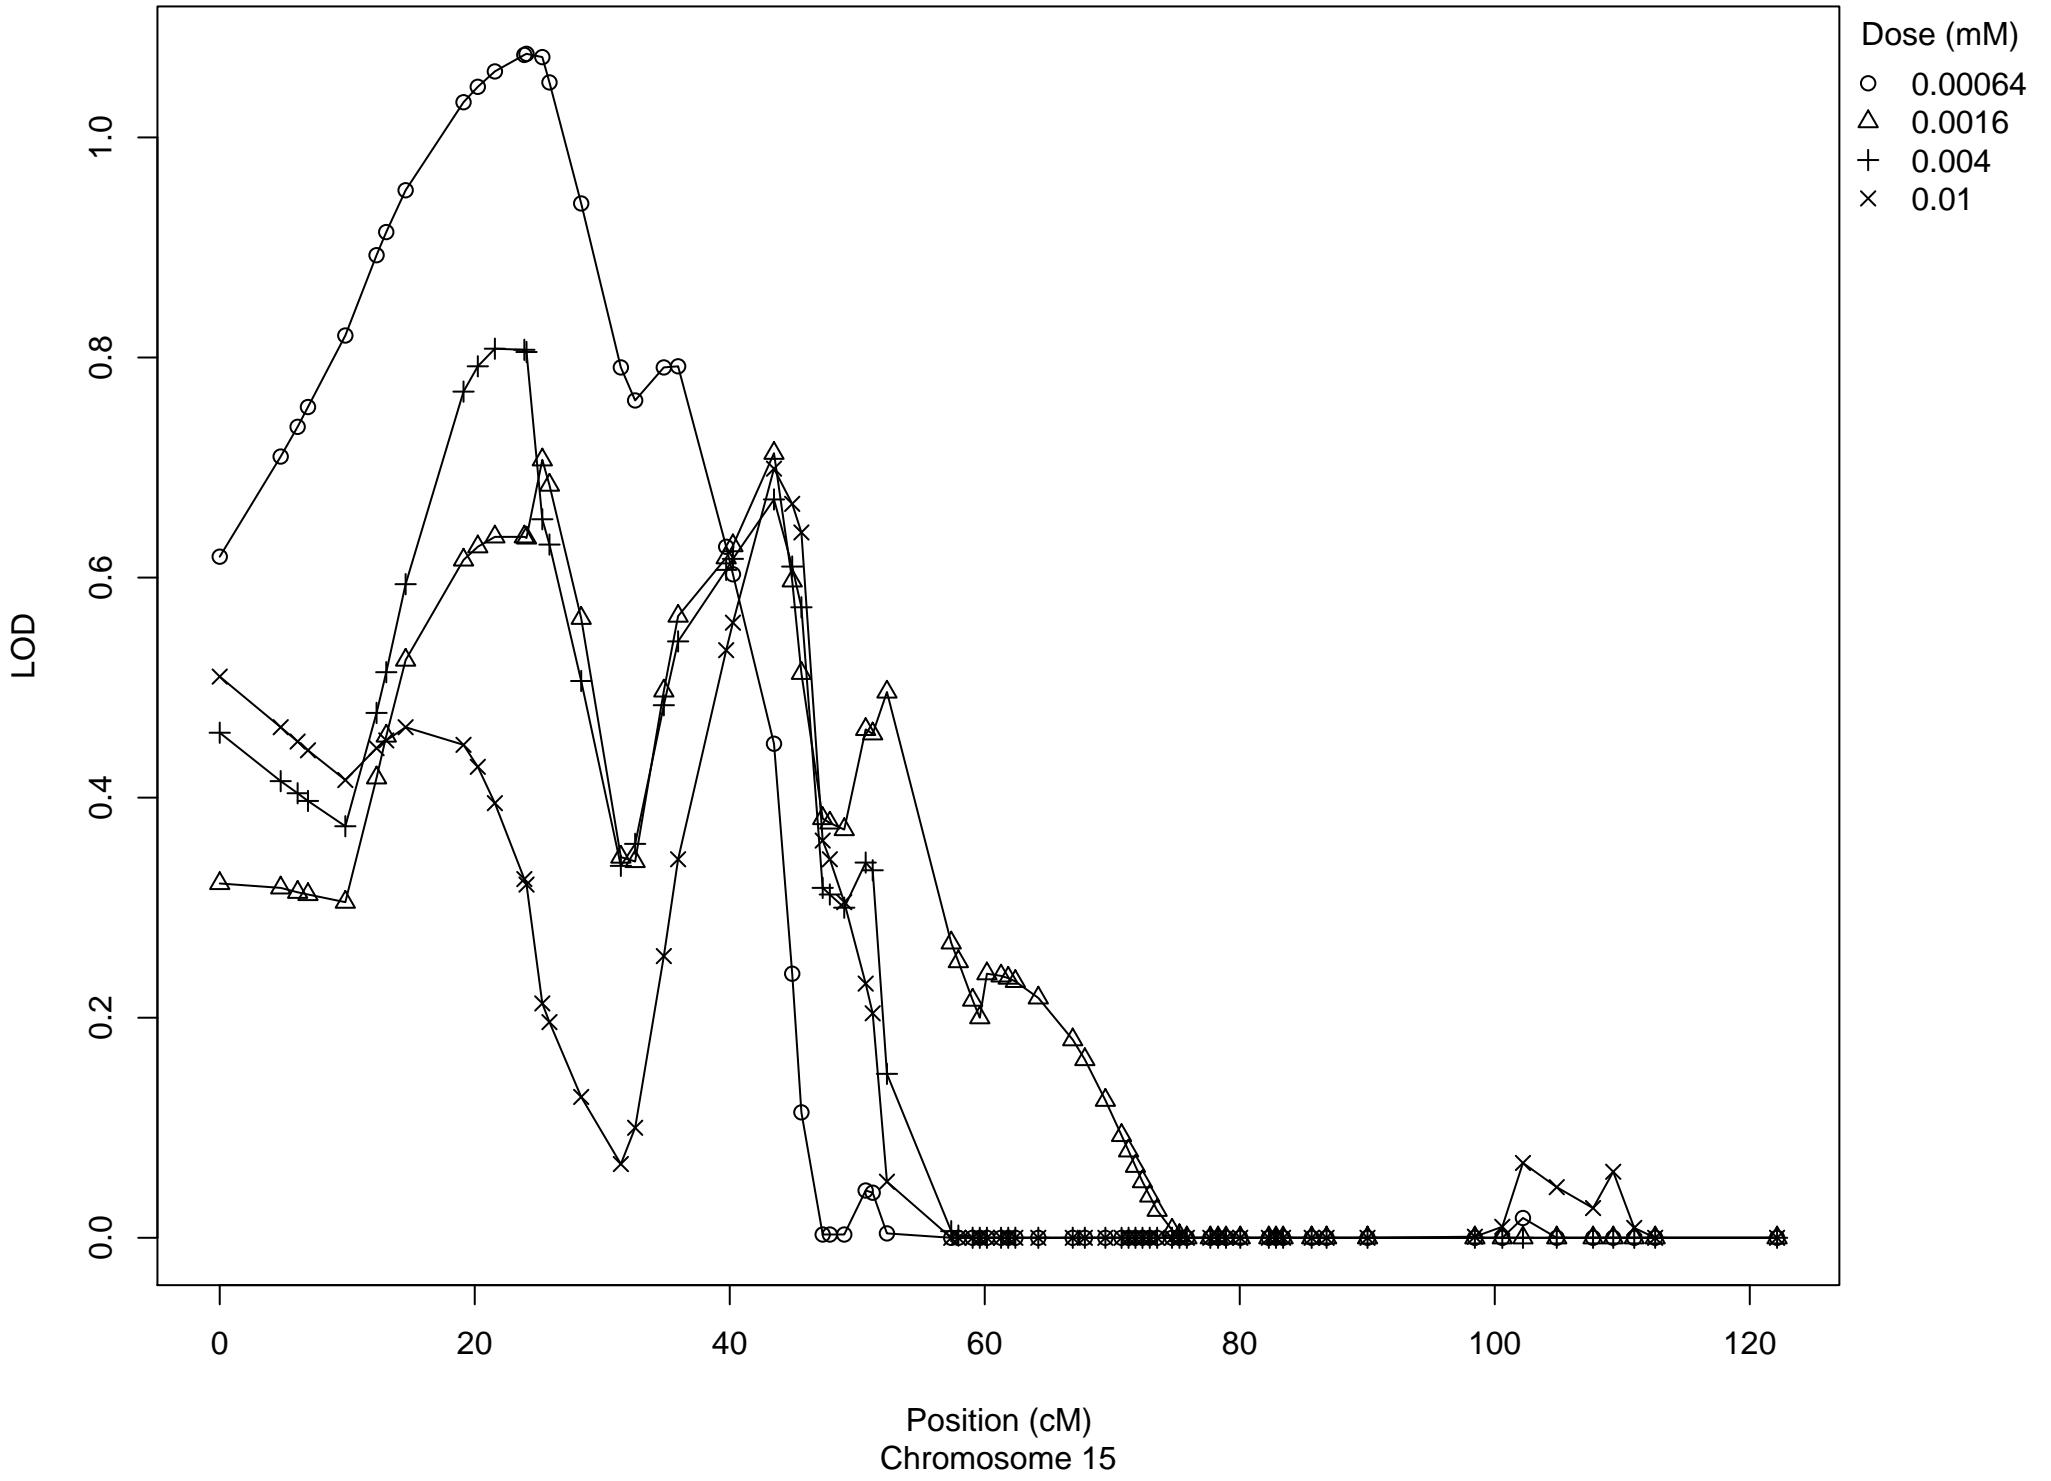

# 2-chloro-2'-deoxyadenosine (Clad)

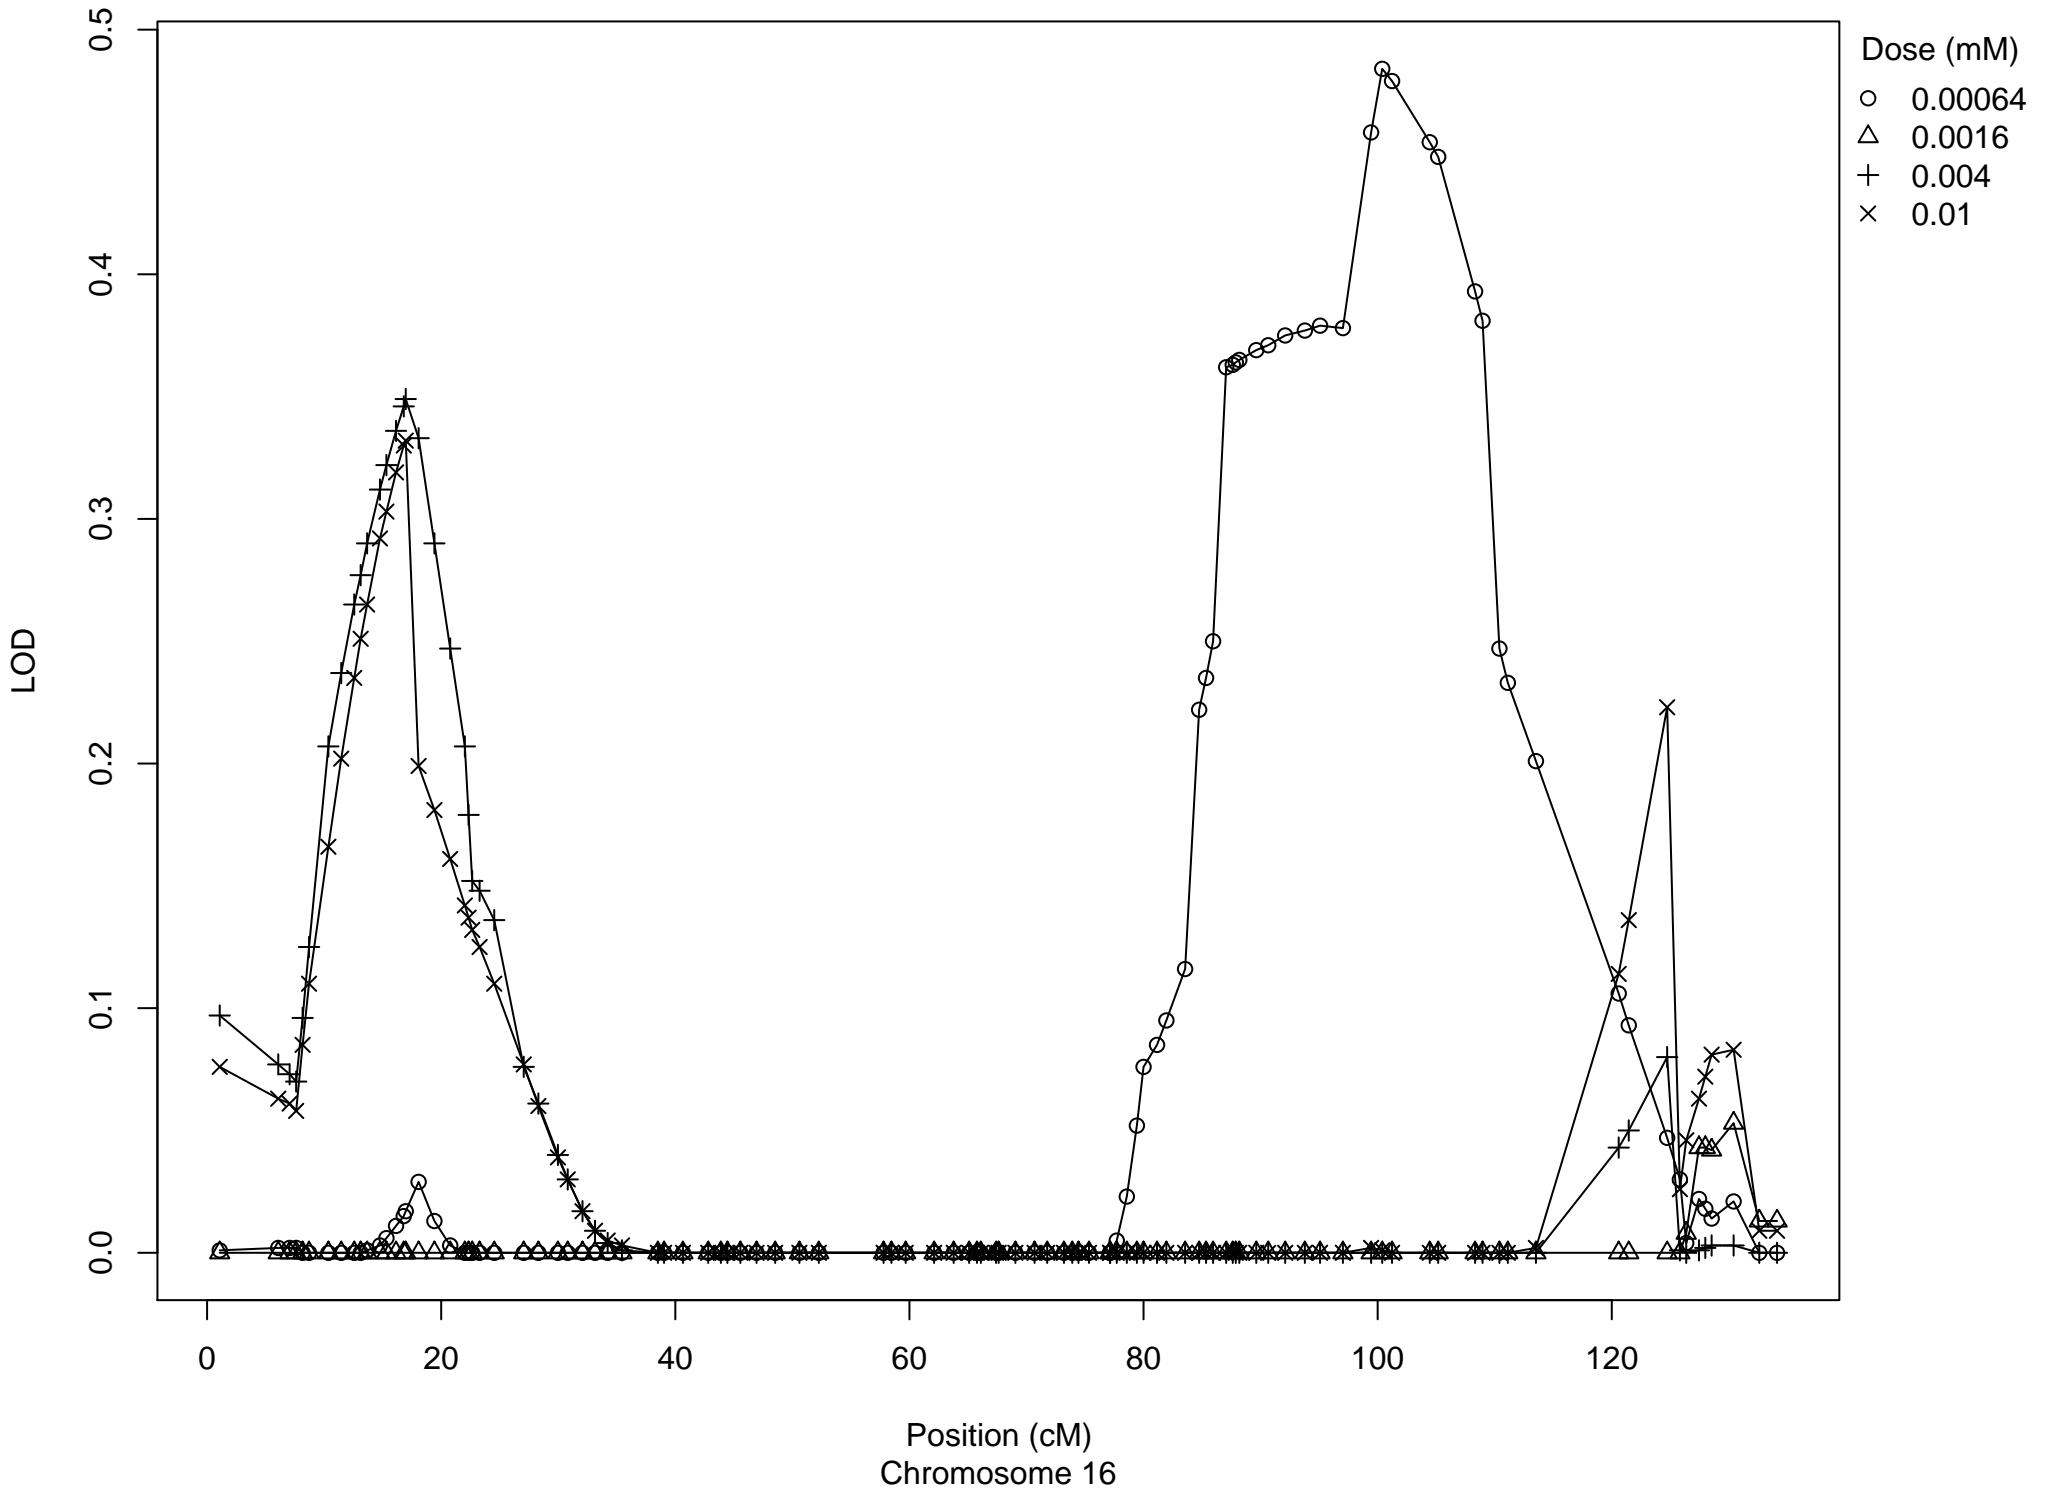



# 2-chloro-2'-deoxyadenosine (Clad)

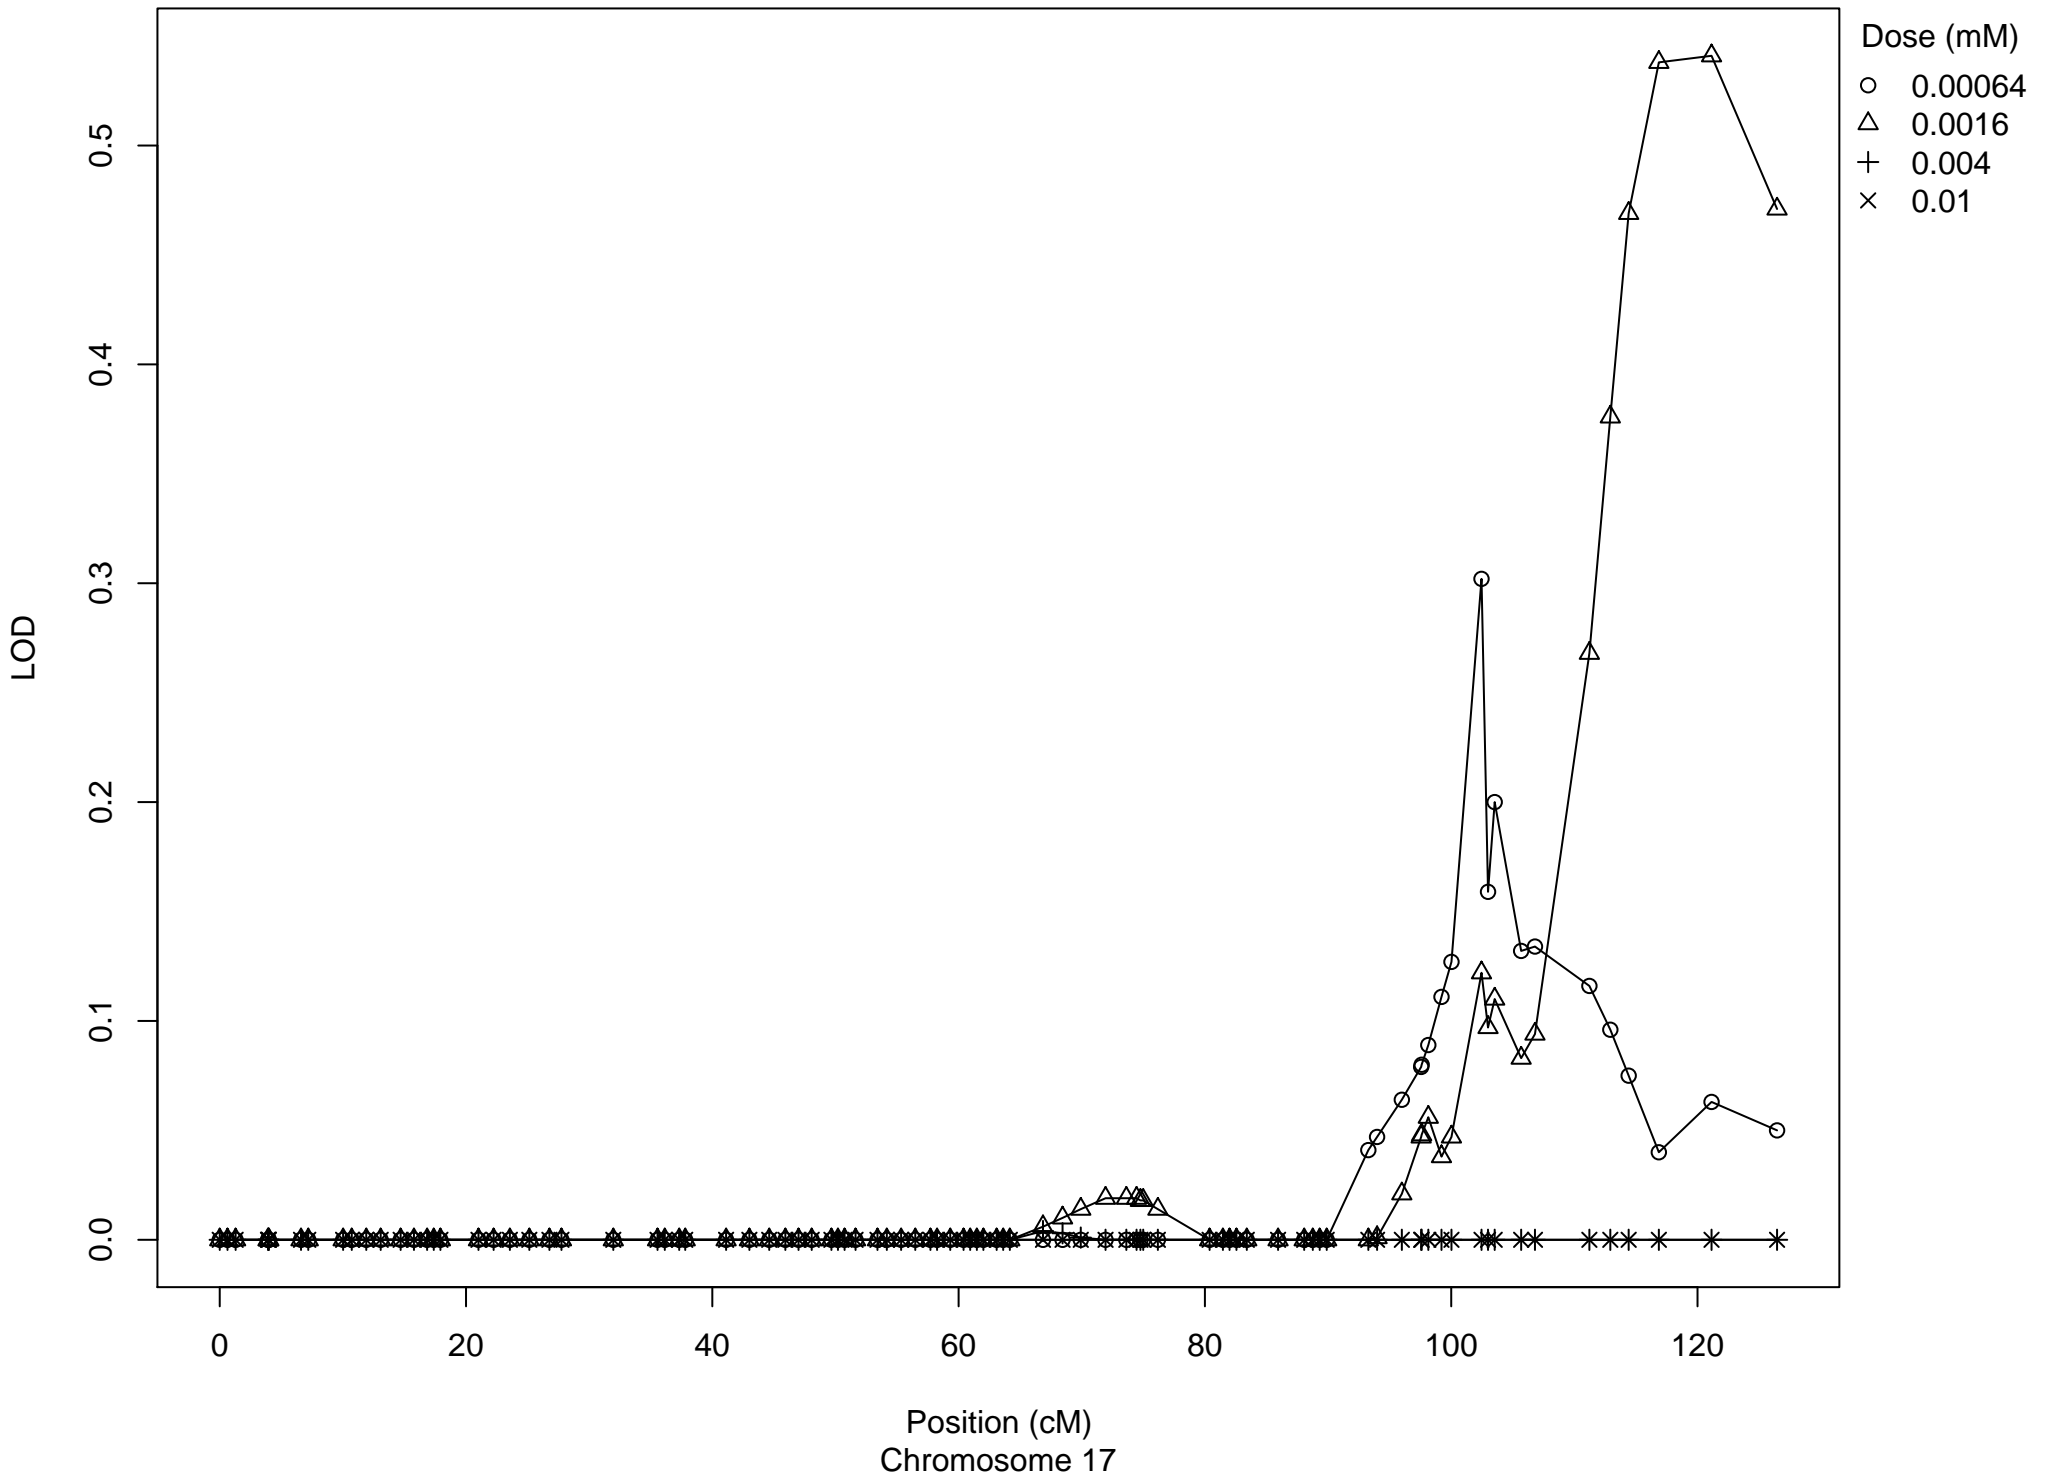

# 2-chloro-2'-deoxyadenosine (Clad)

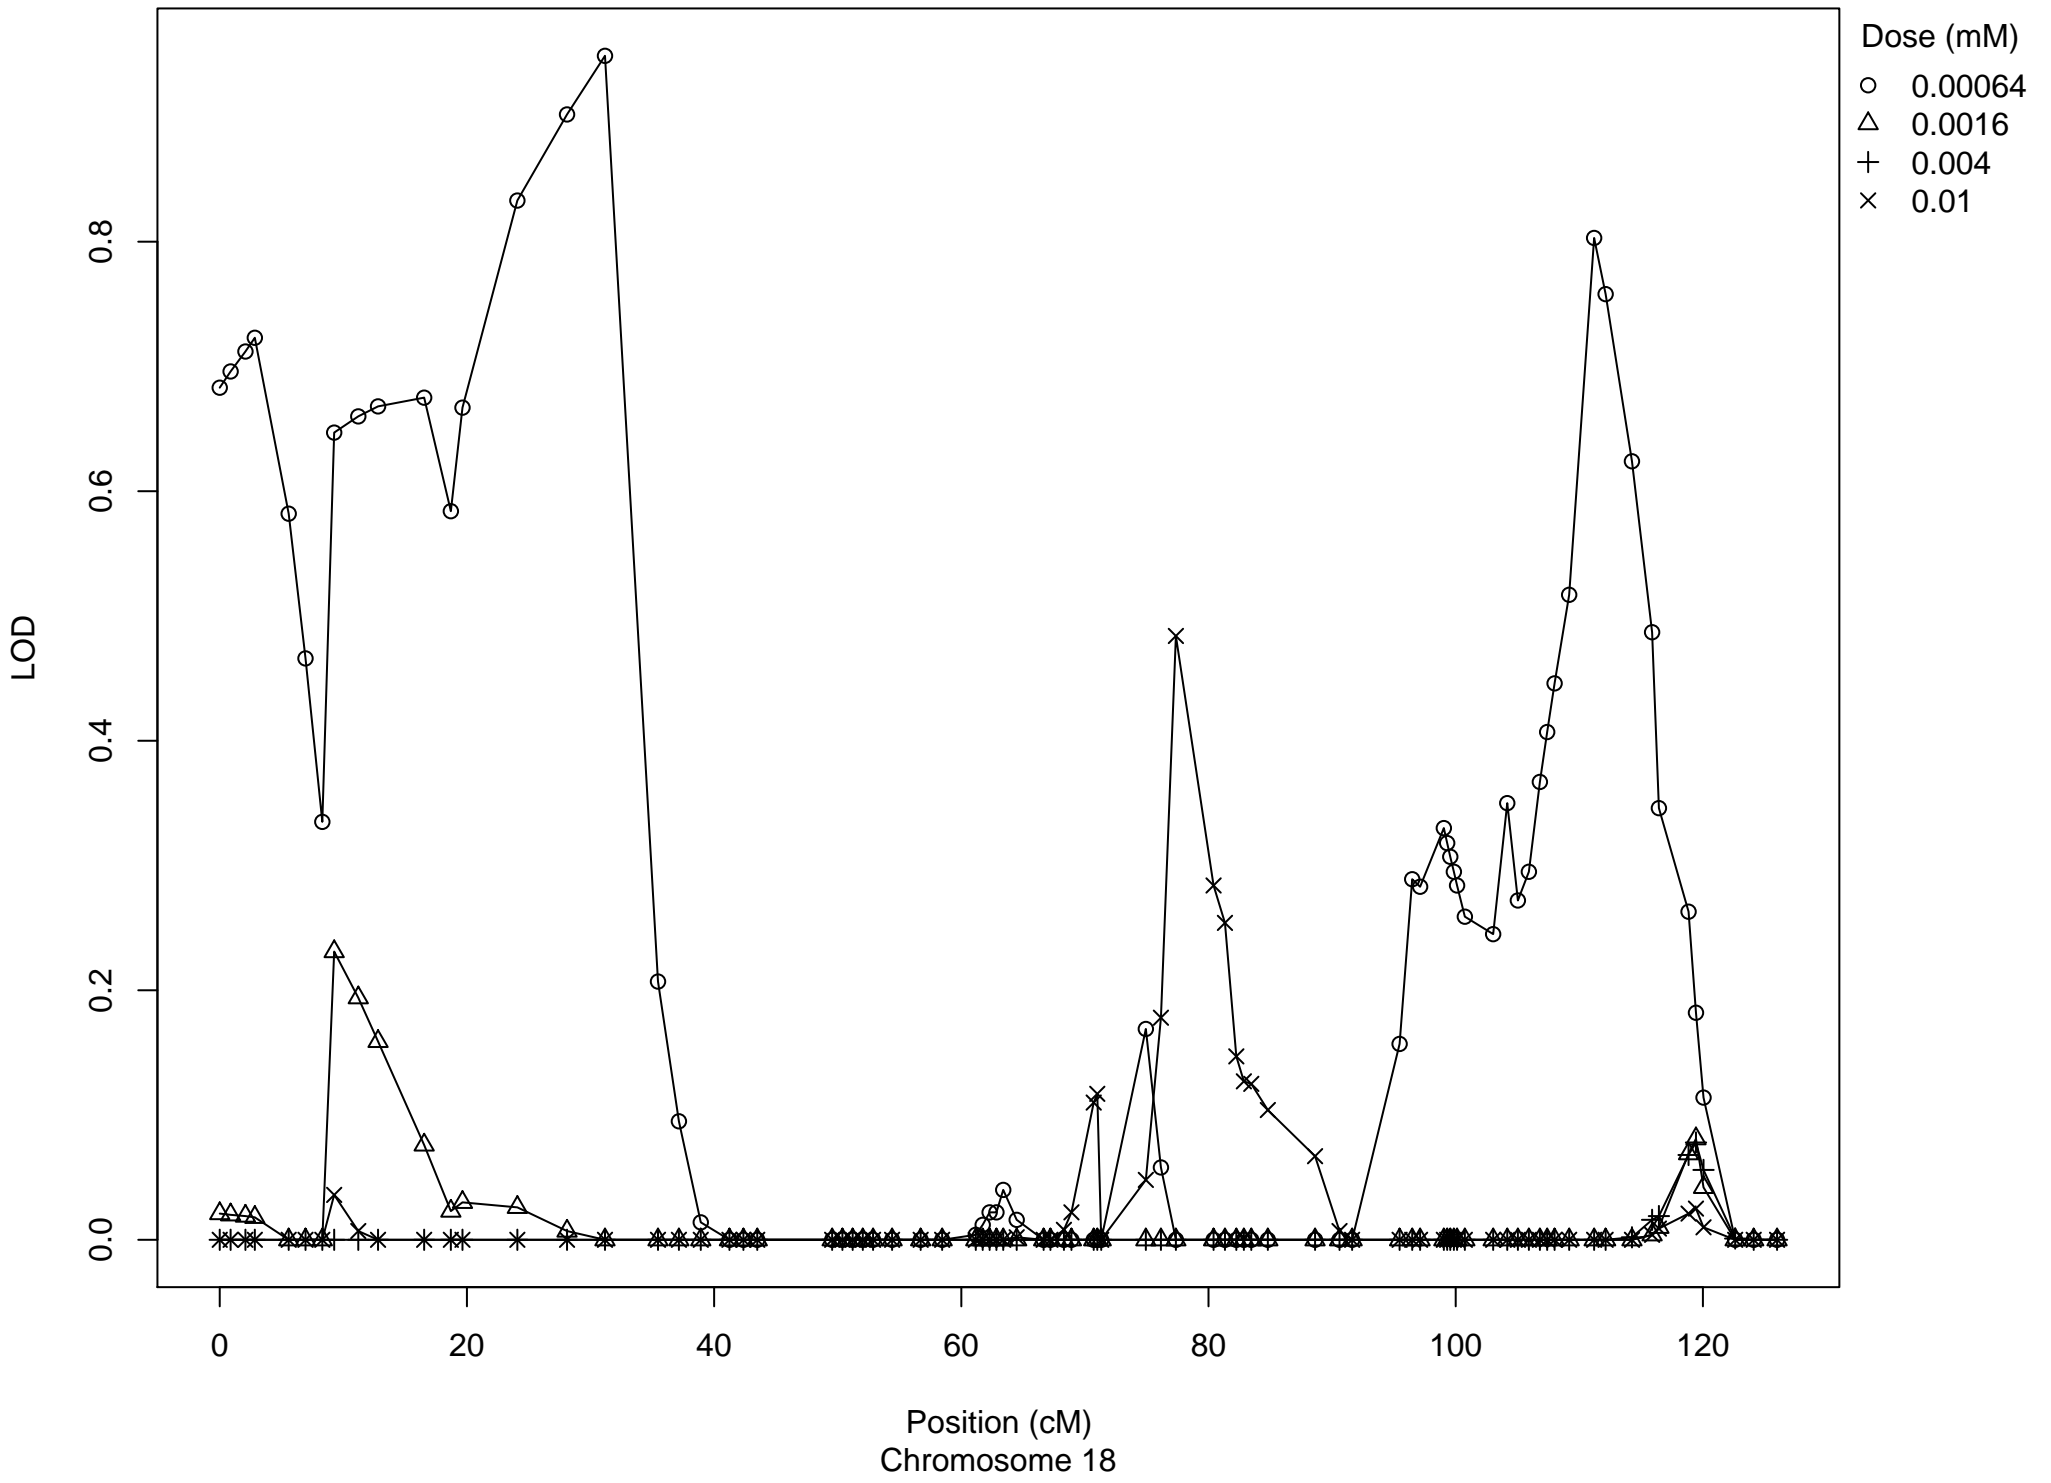

# 2-chloro-2'-deoxyadenosine (Clad)

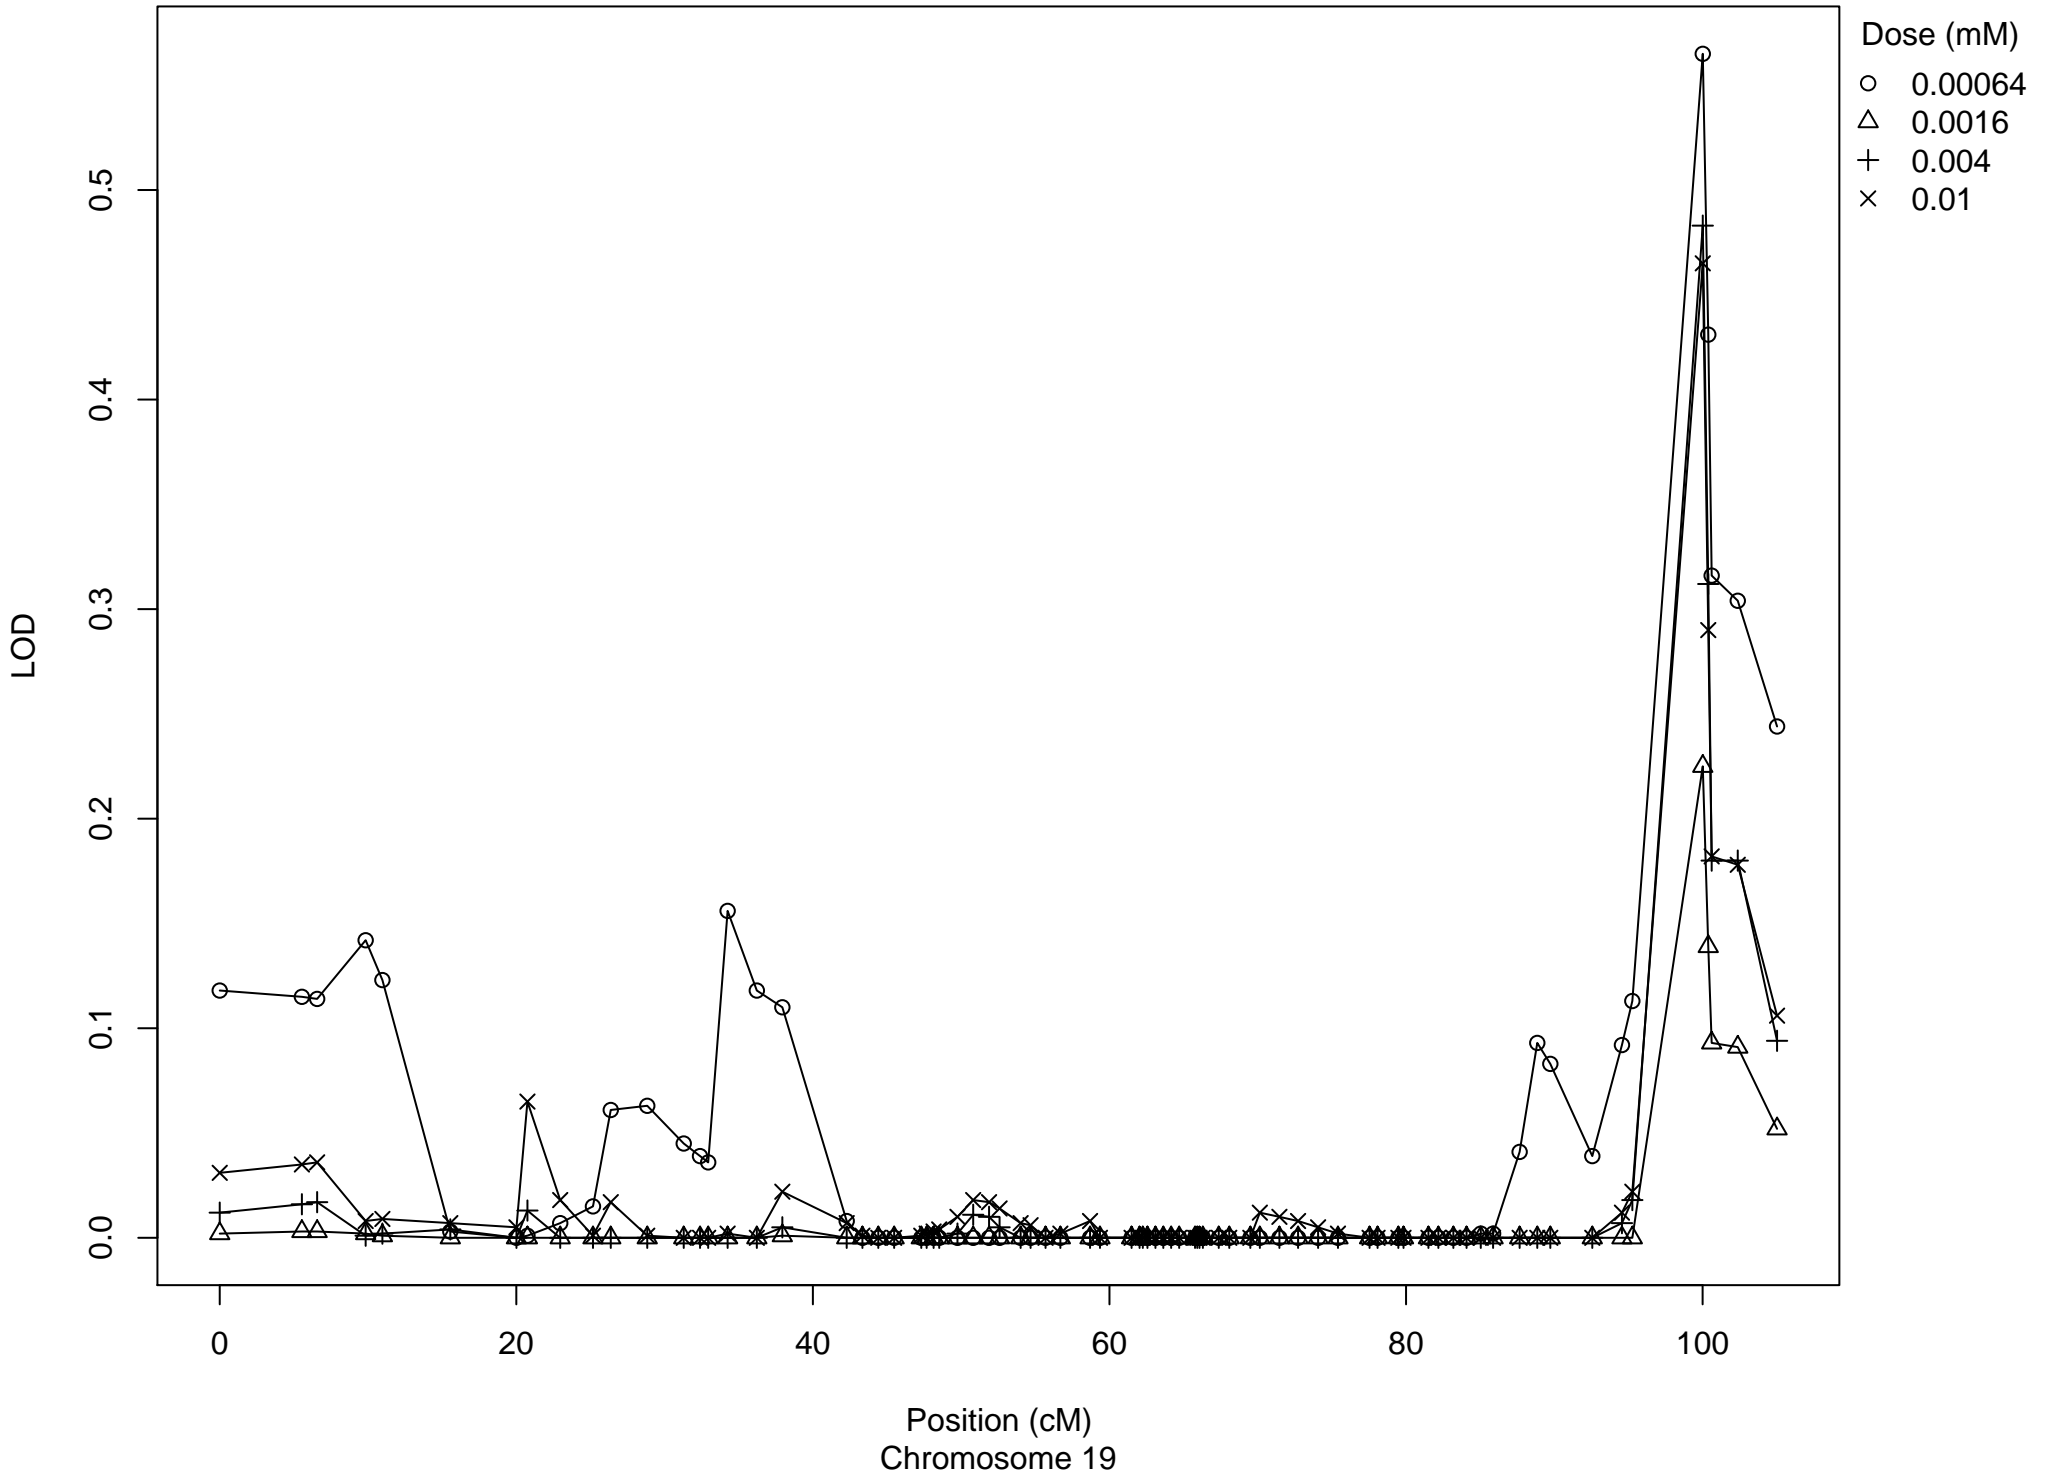

# 2-chloro-2'-deoxyadenosine (Clad)

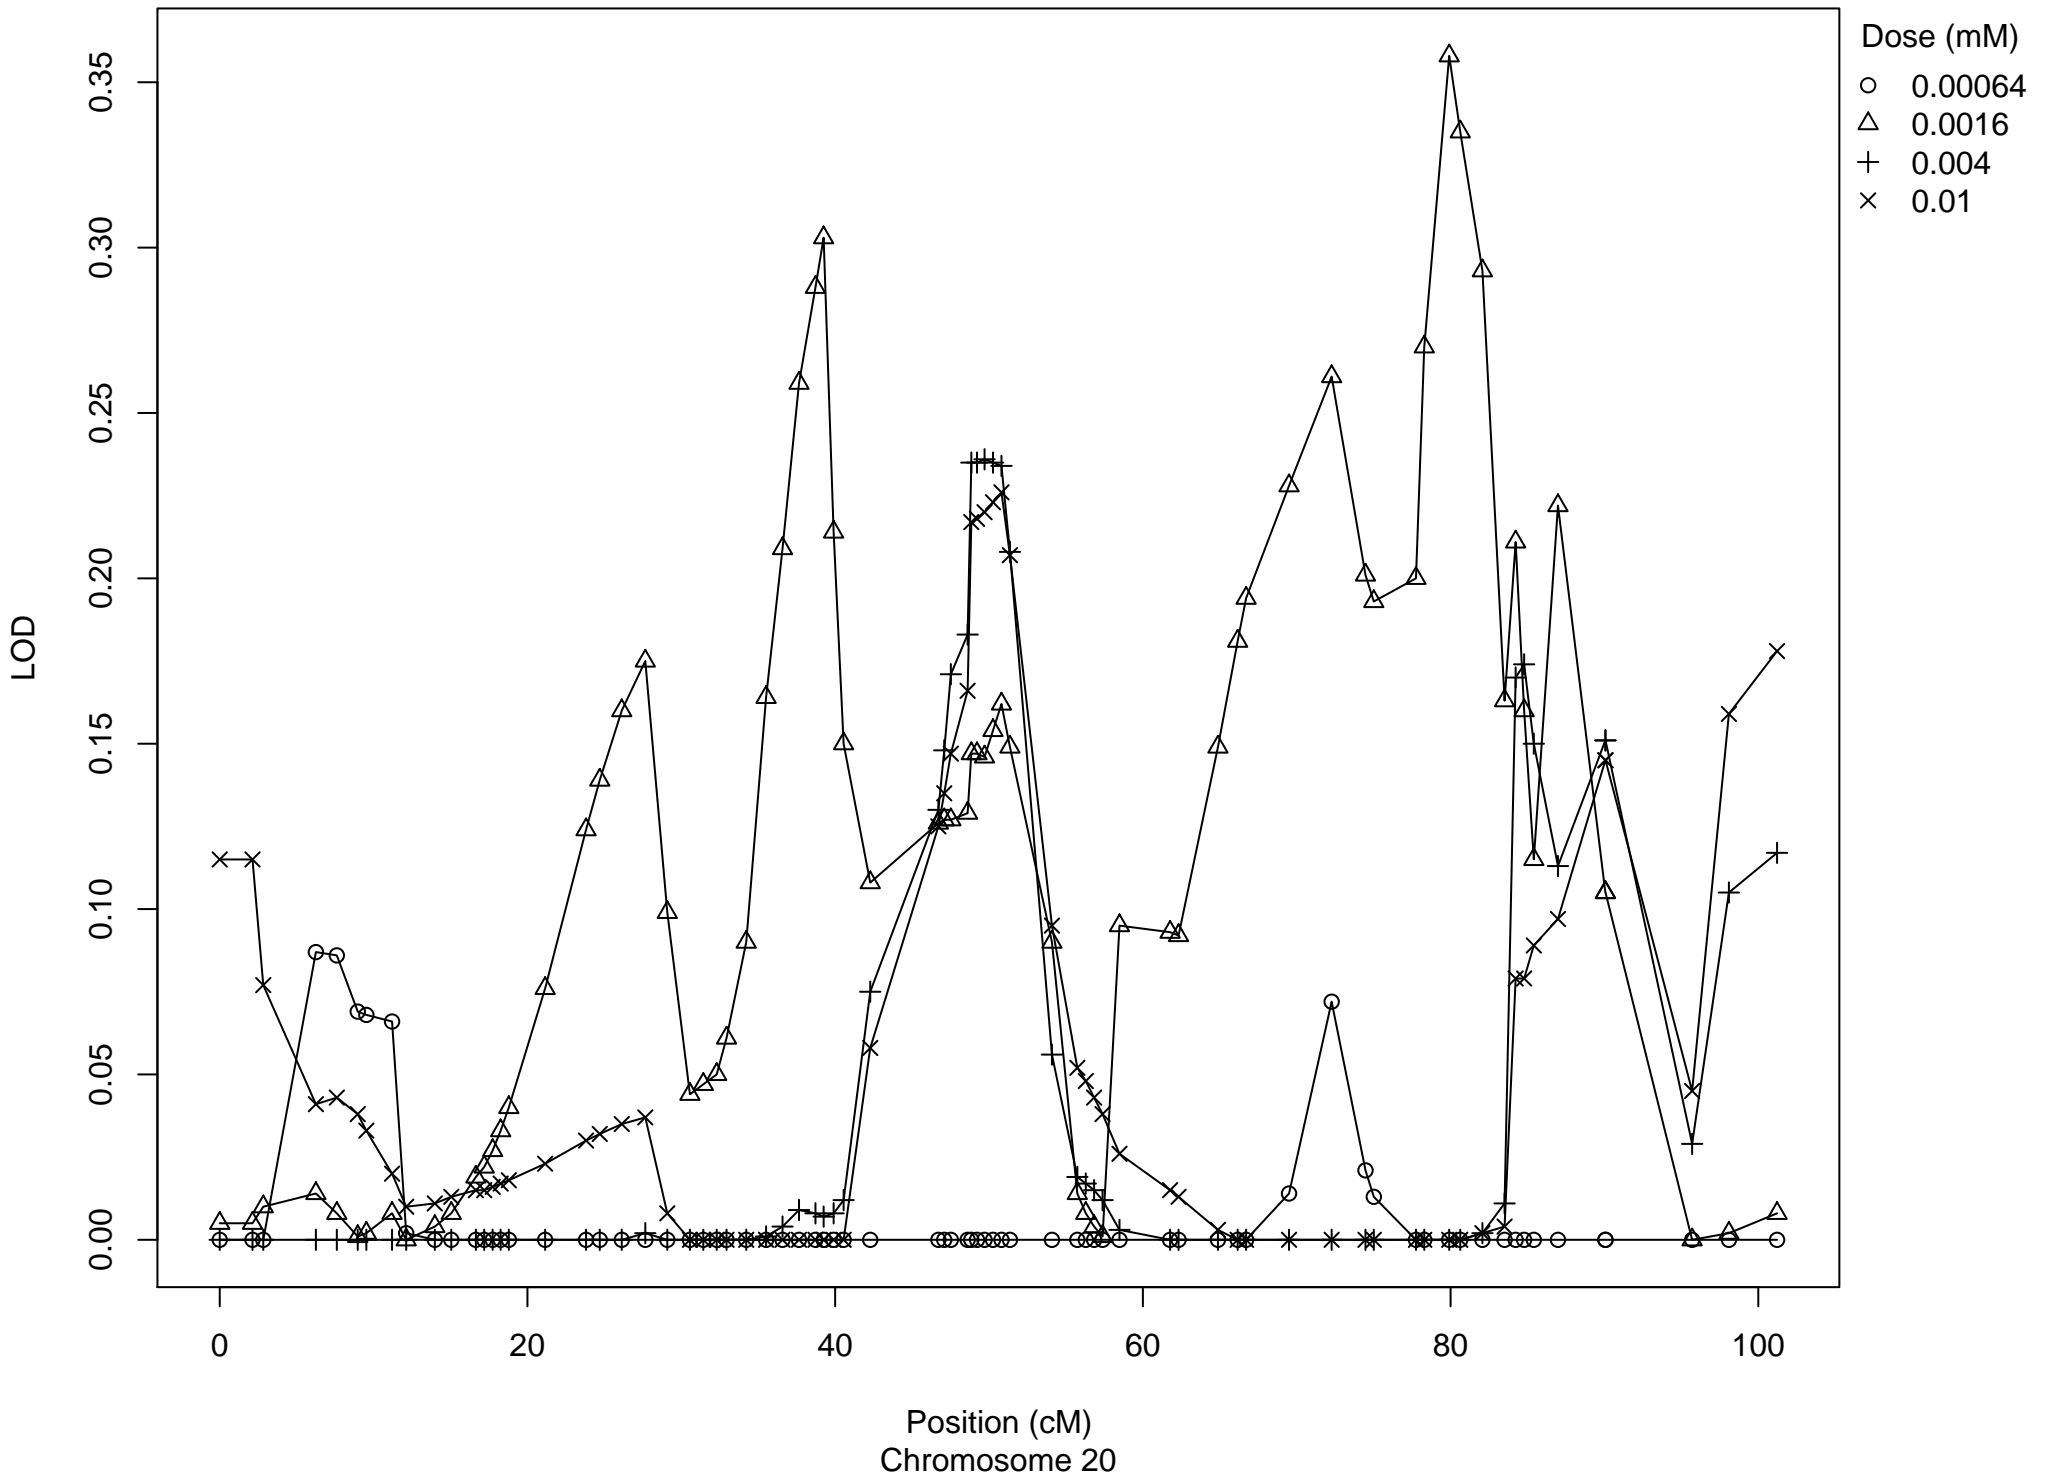

# 2-chloro-2'-deoxyadenosine (Clad)

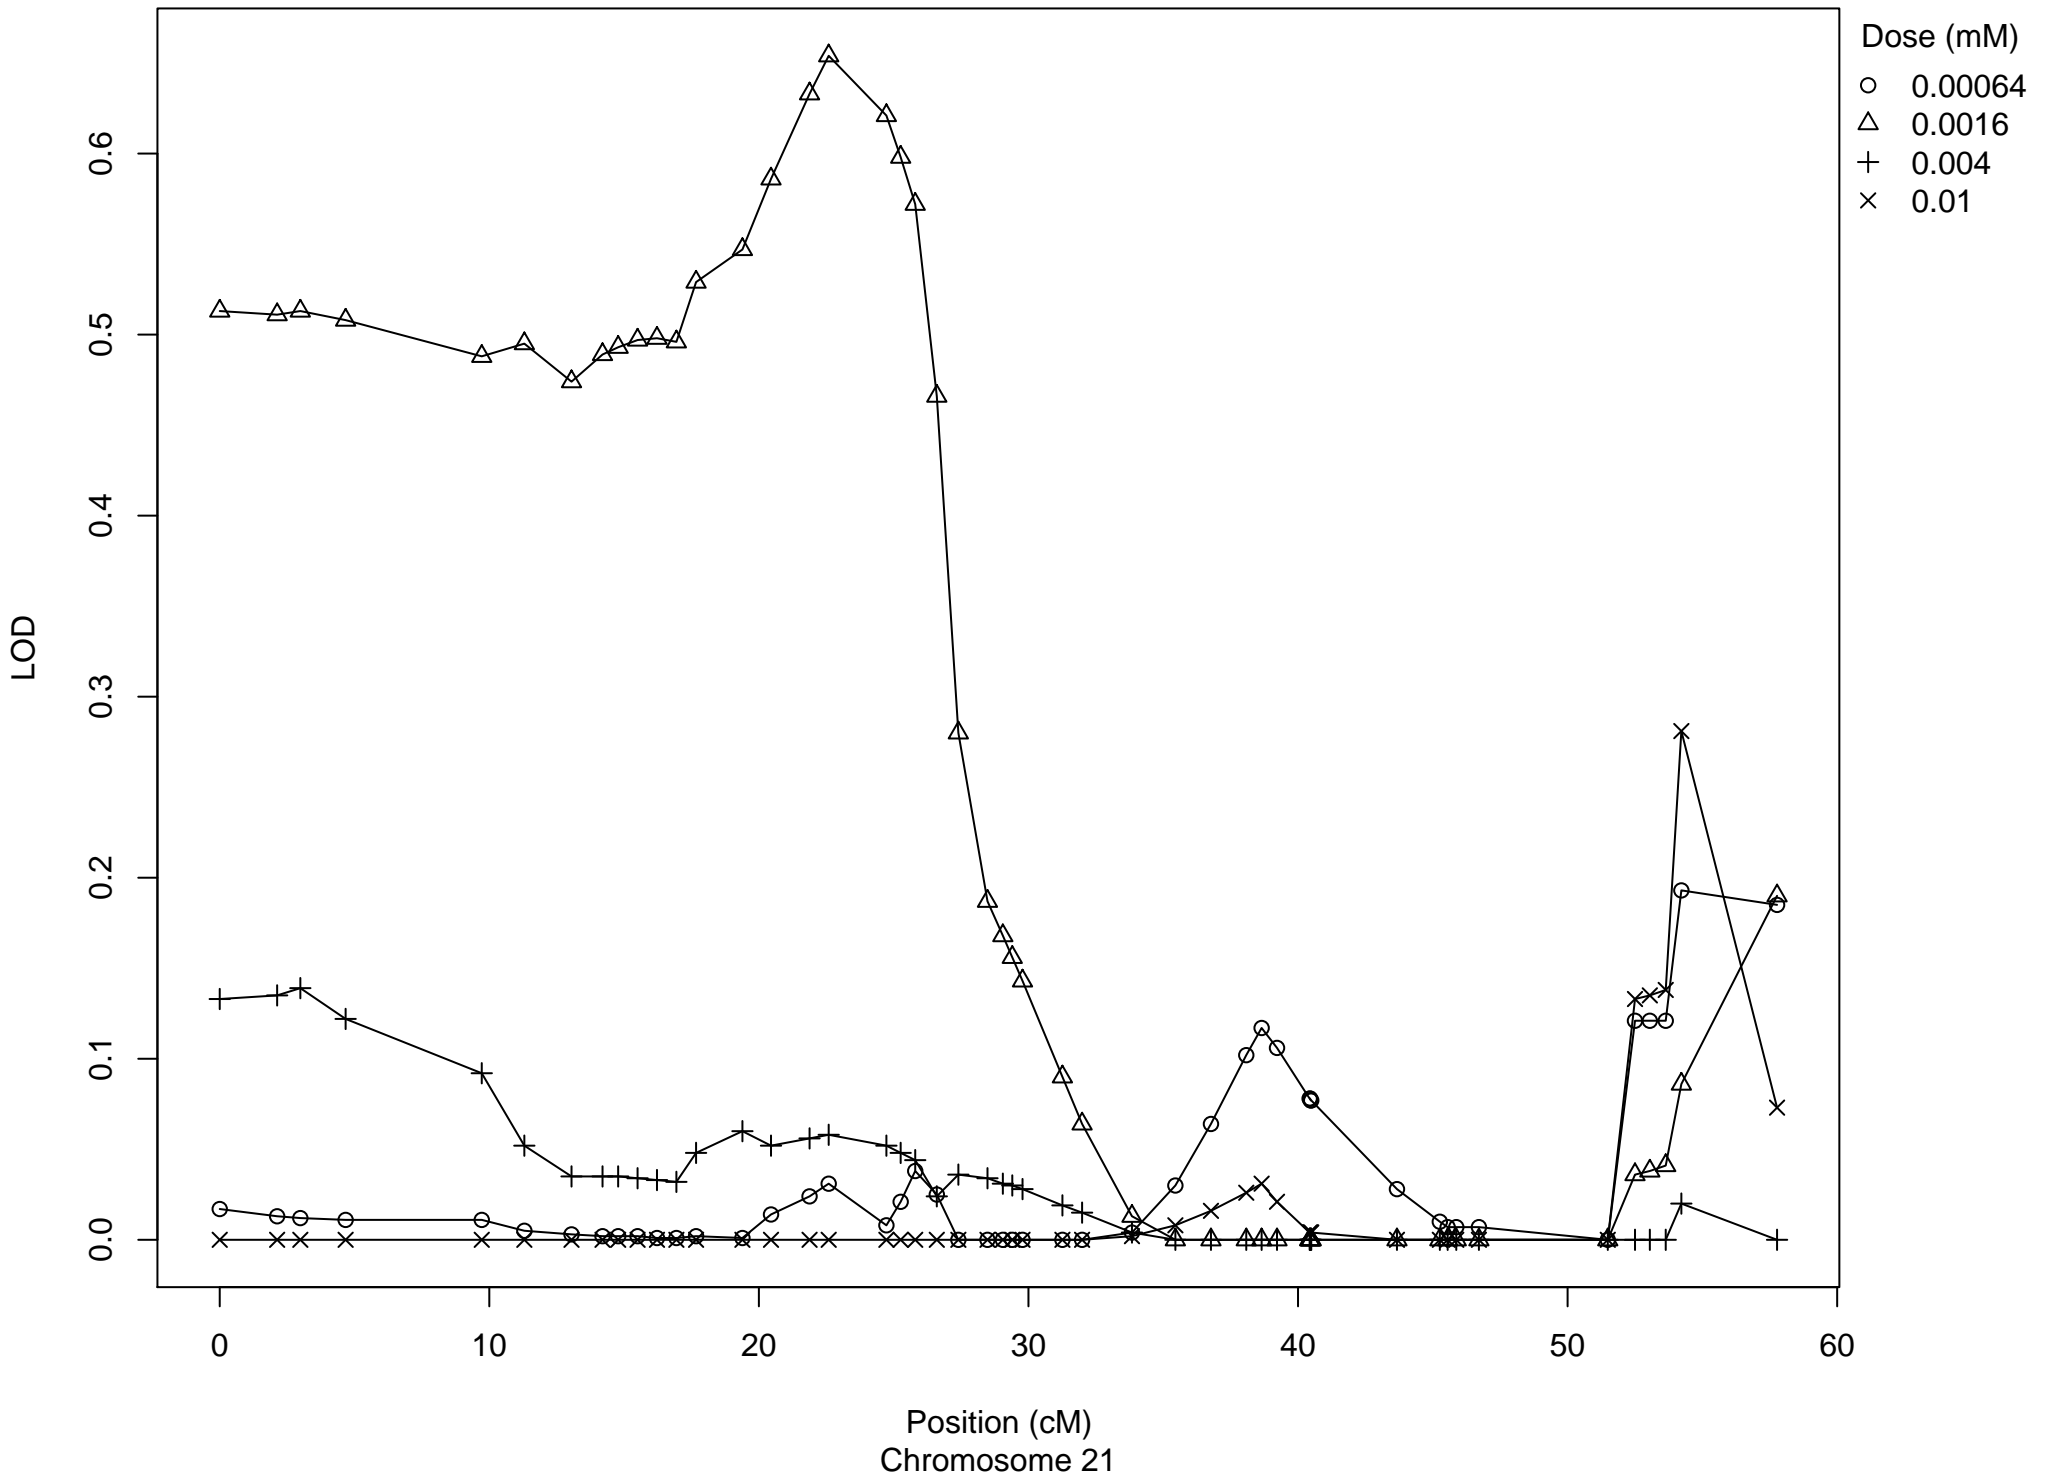

# 2-chloro-2'-deoxyadenosine (Clad)

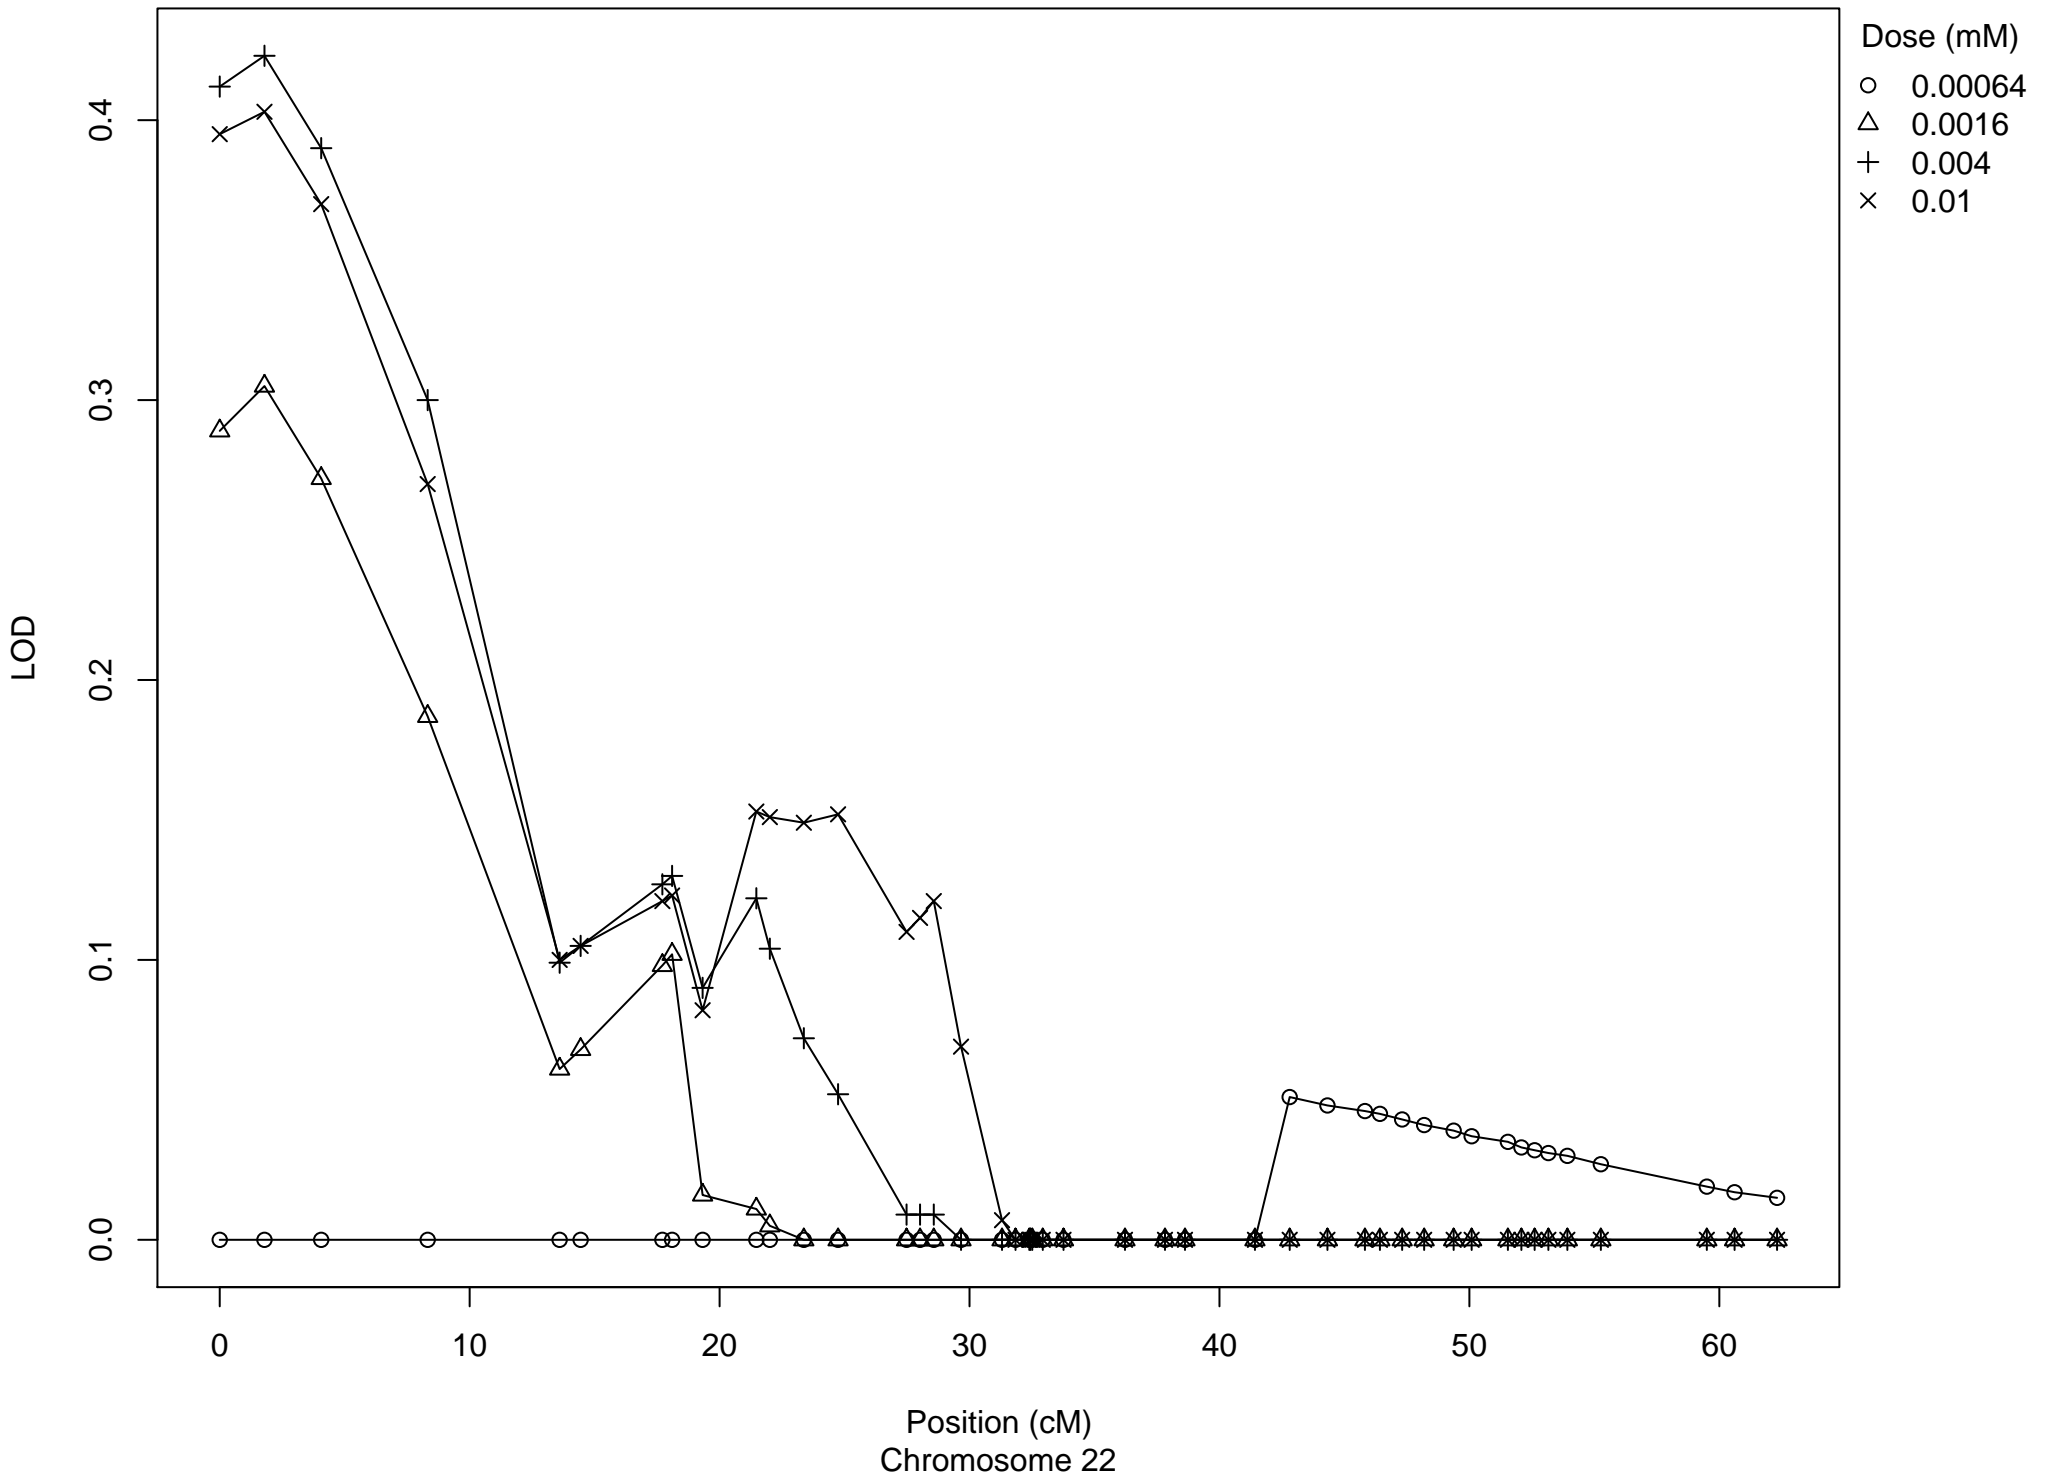

# 2-fluoroadenine-9-beta-d-arabinofuranoside (Flud)

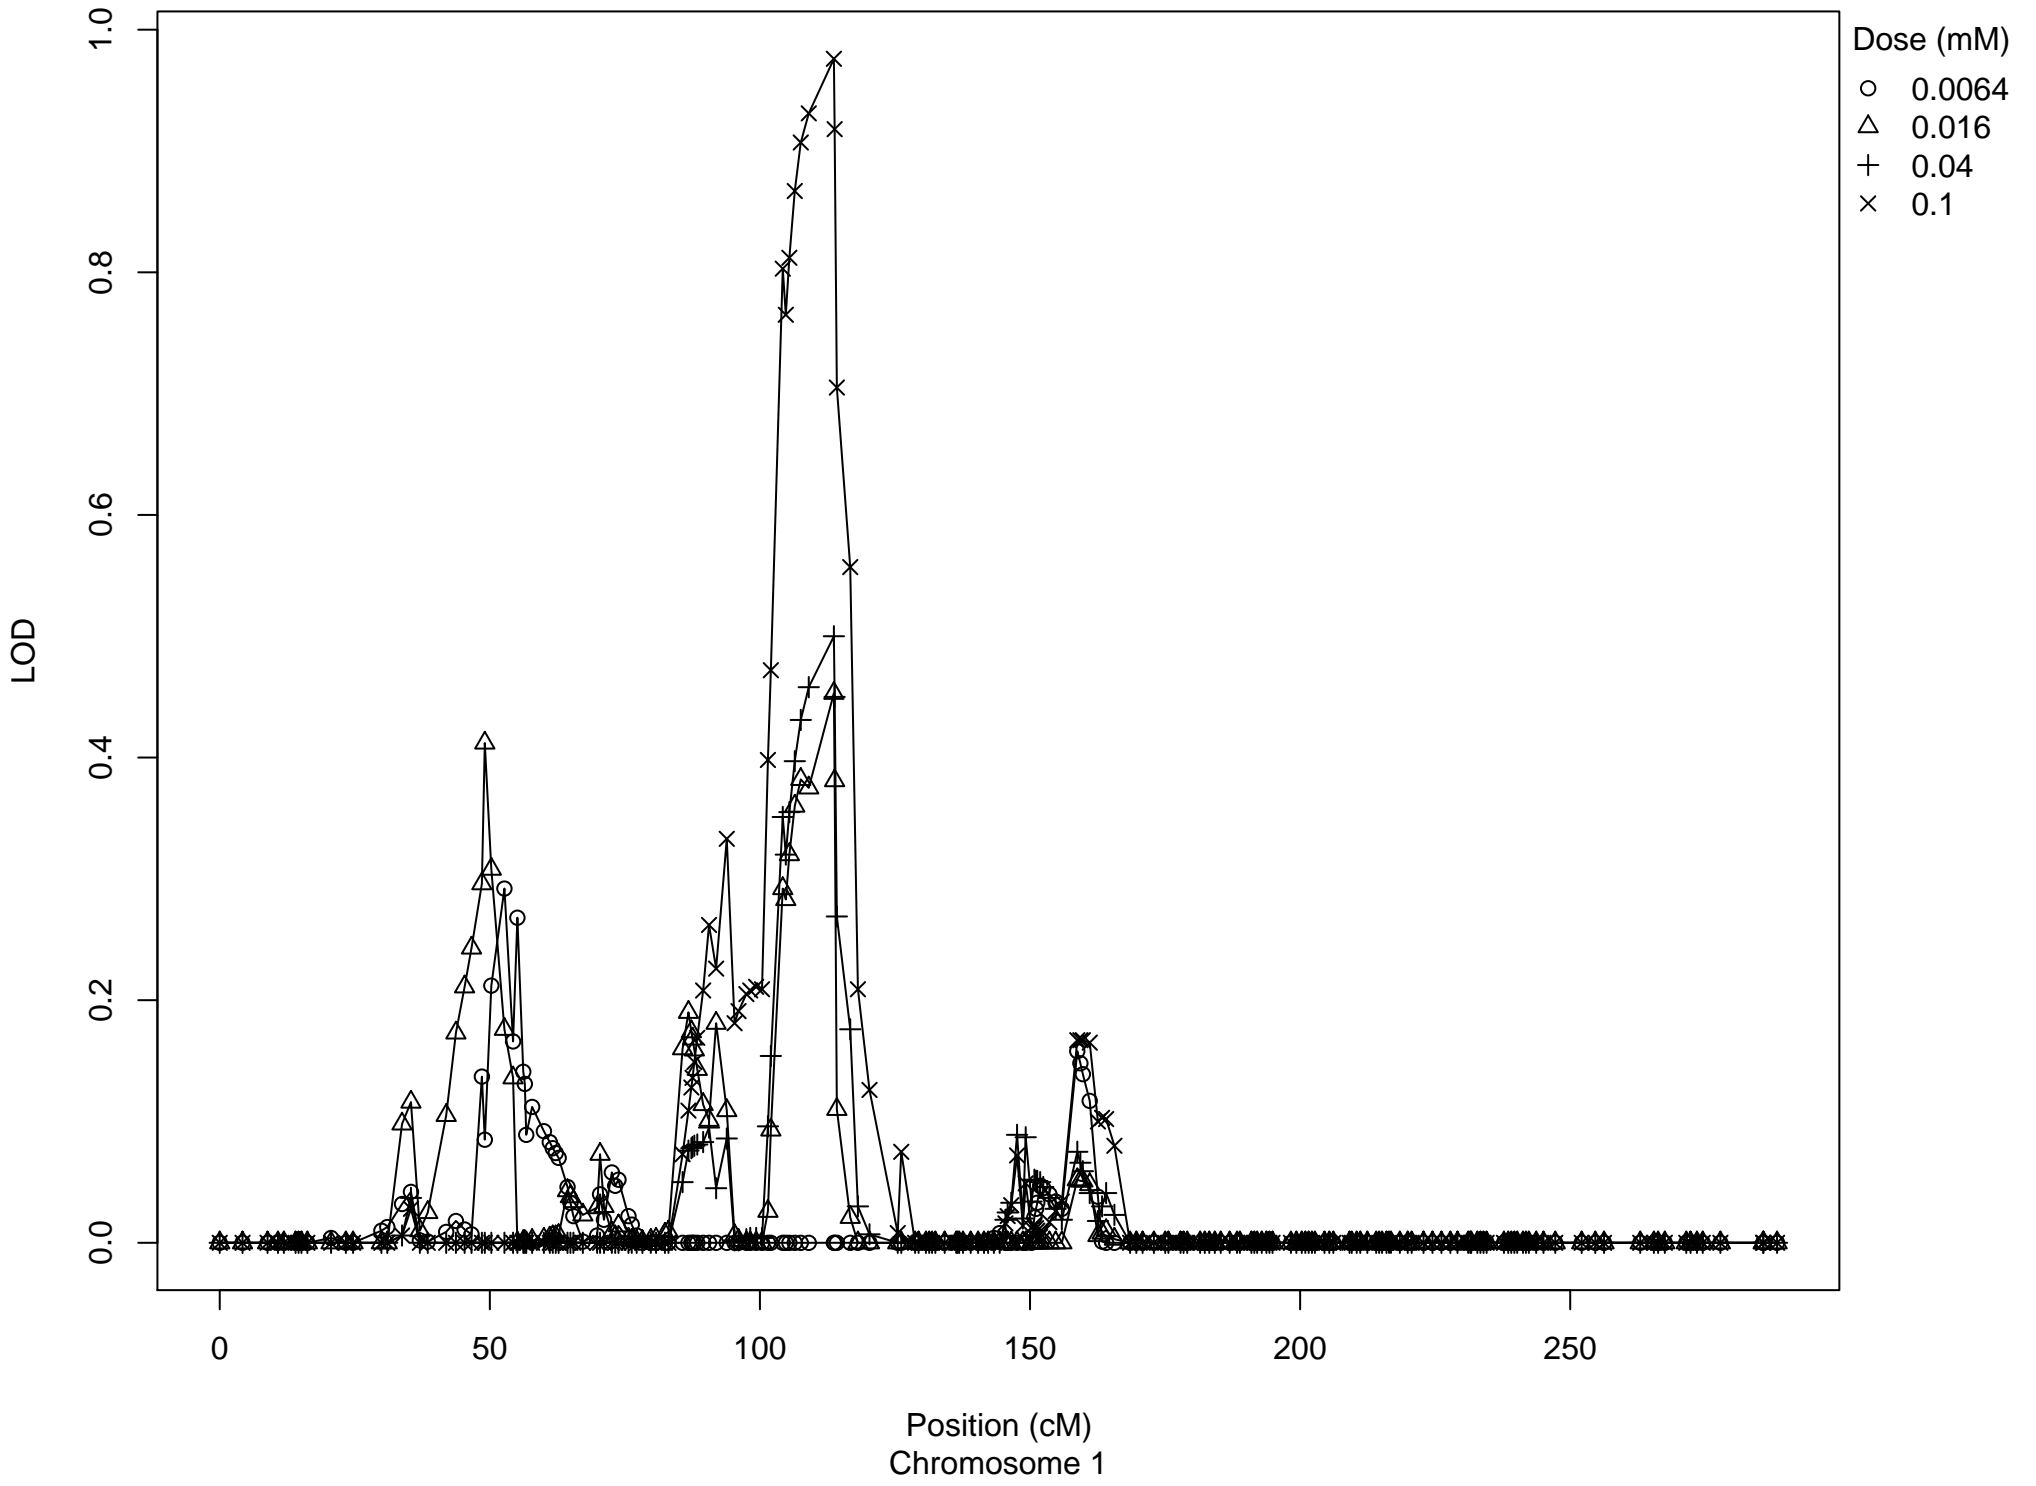

# 2-fluoroadenine-9-beta-d-arabinofuranoside (Flud)

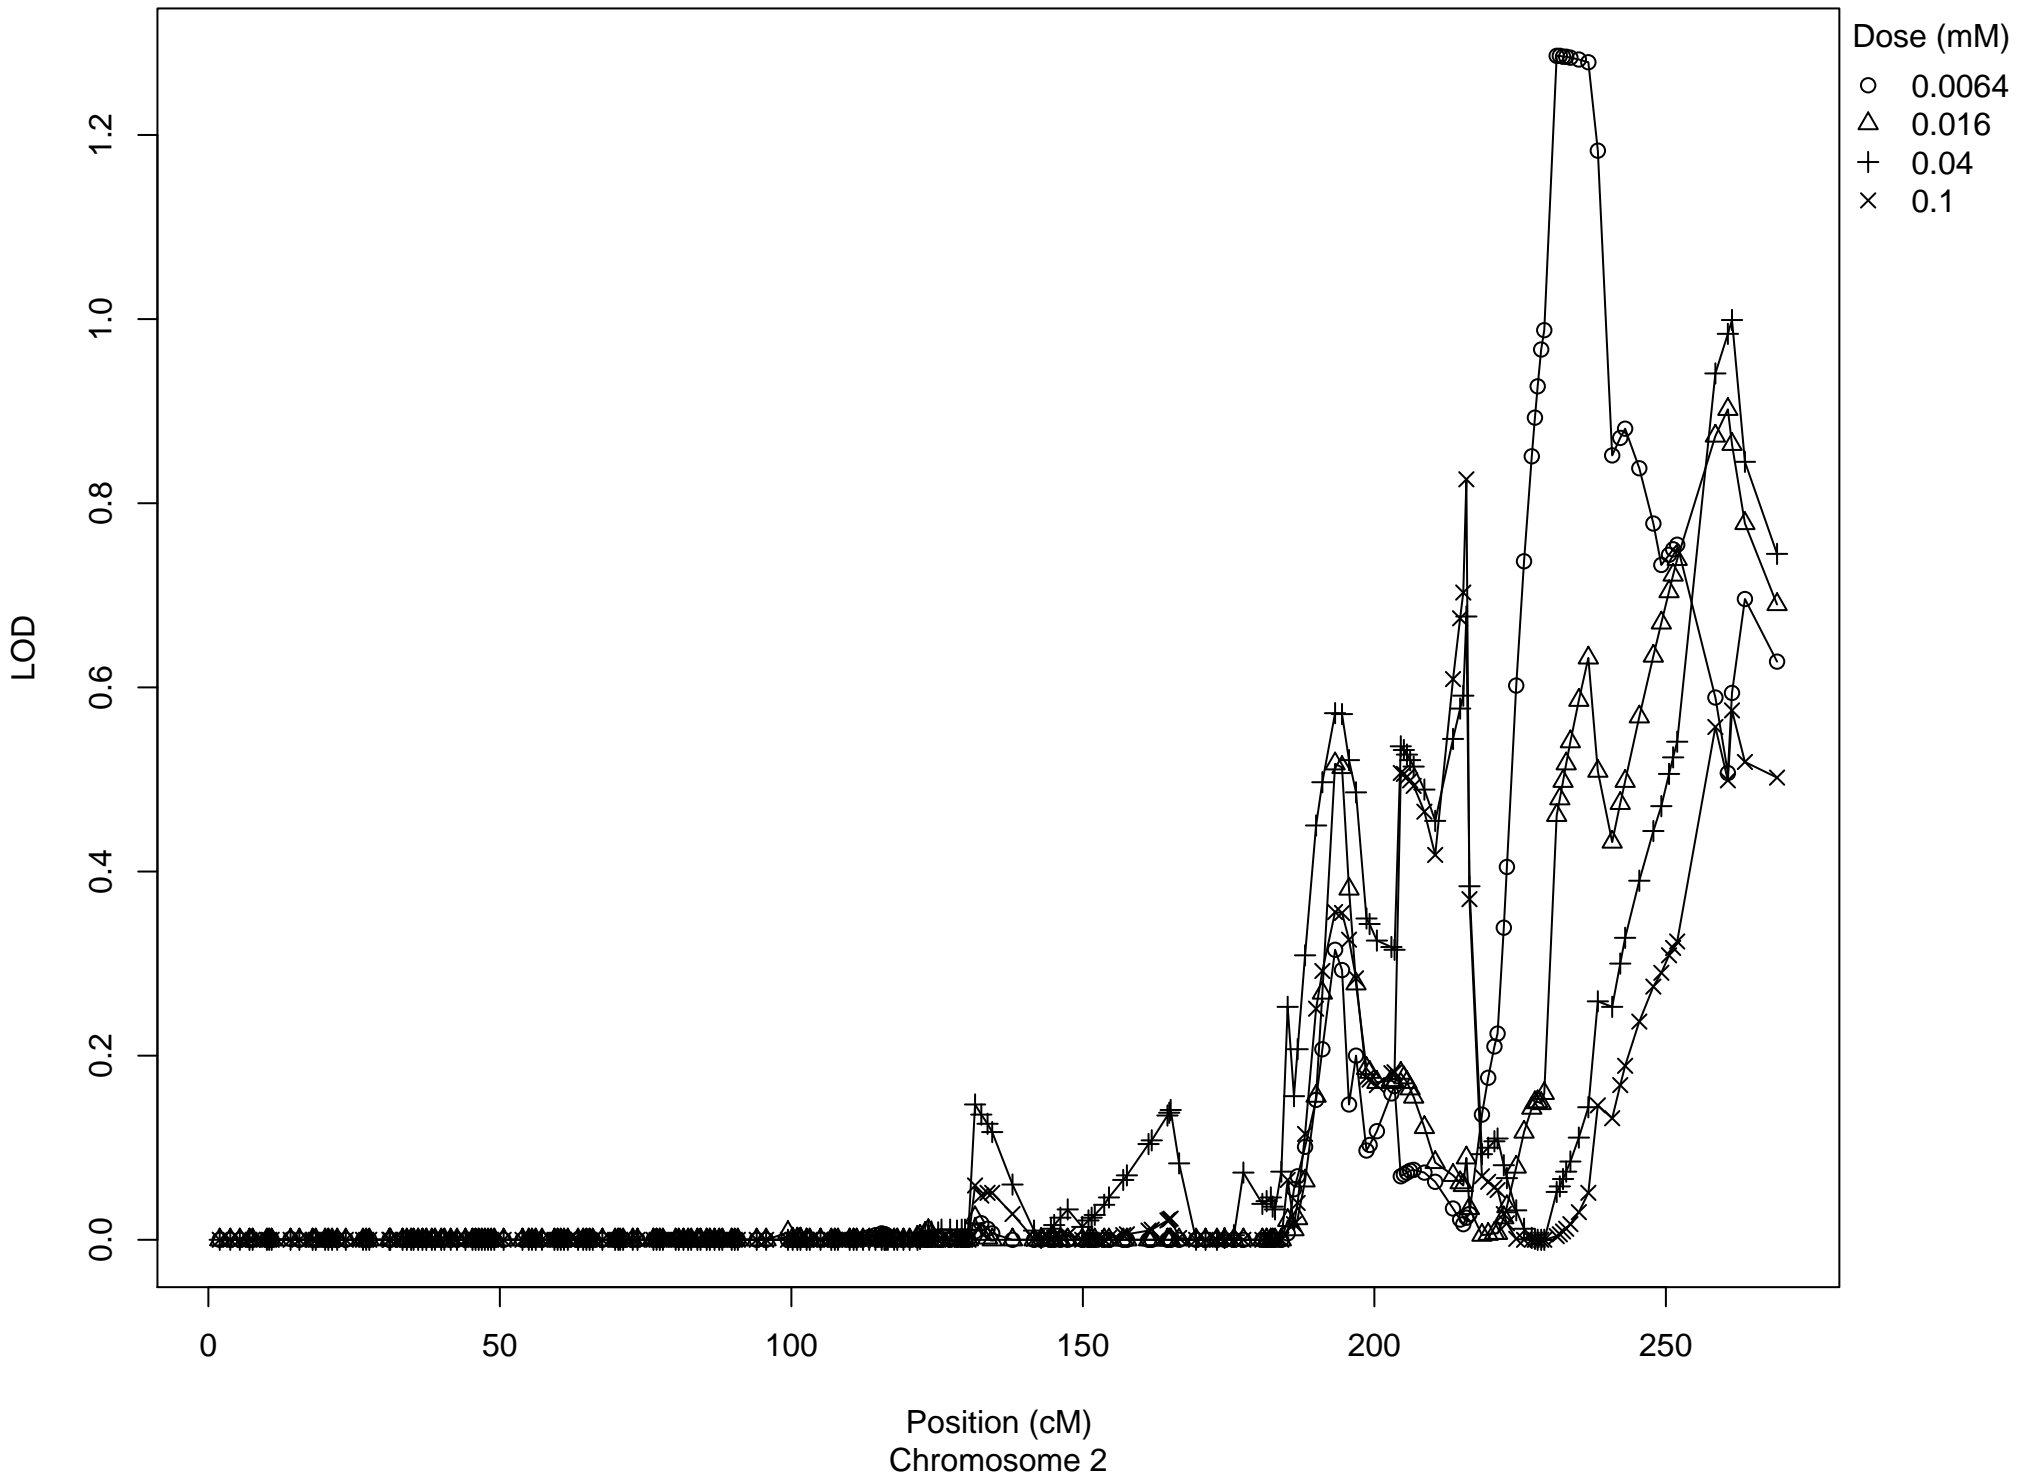



# 2-fluoroadenine-9-beta-d-arabinofuranoside (Flud)

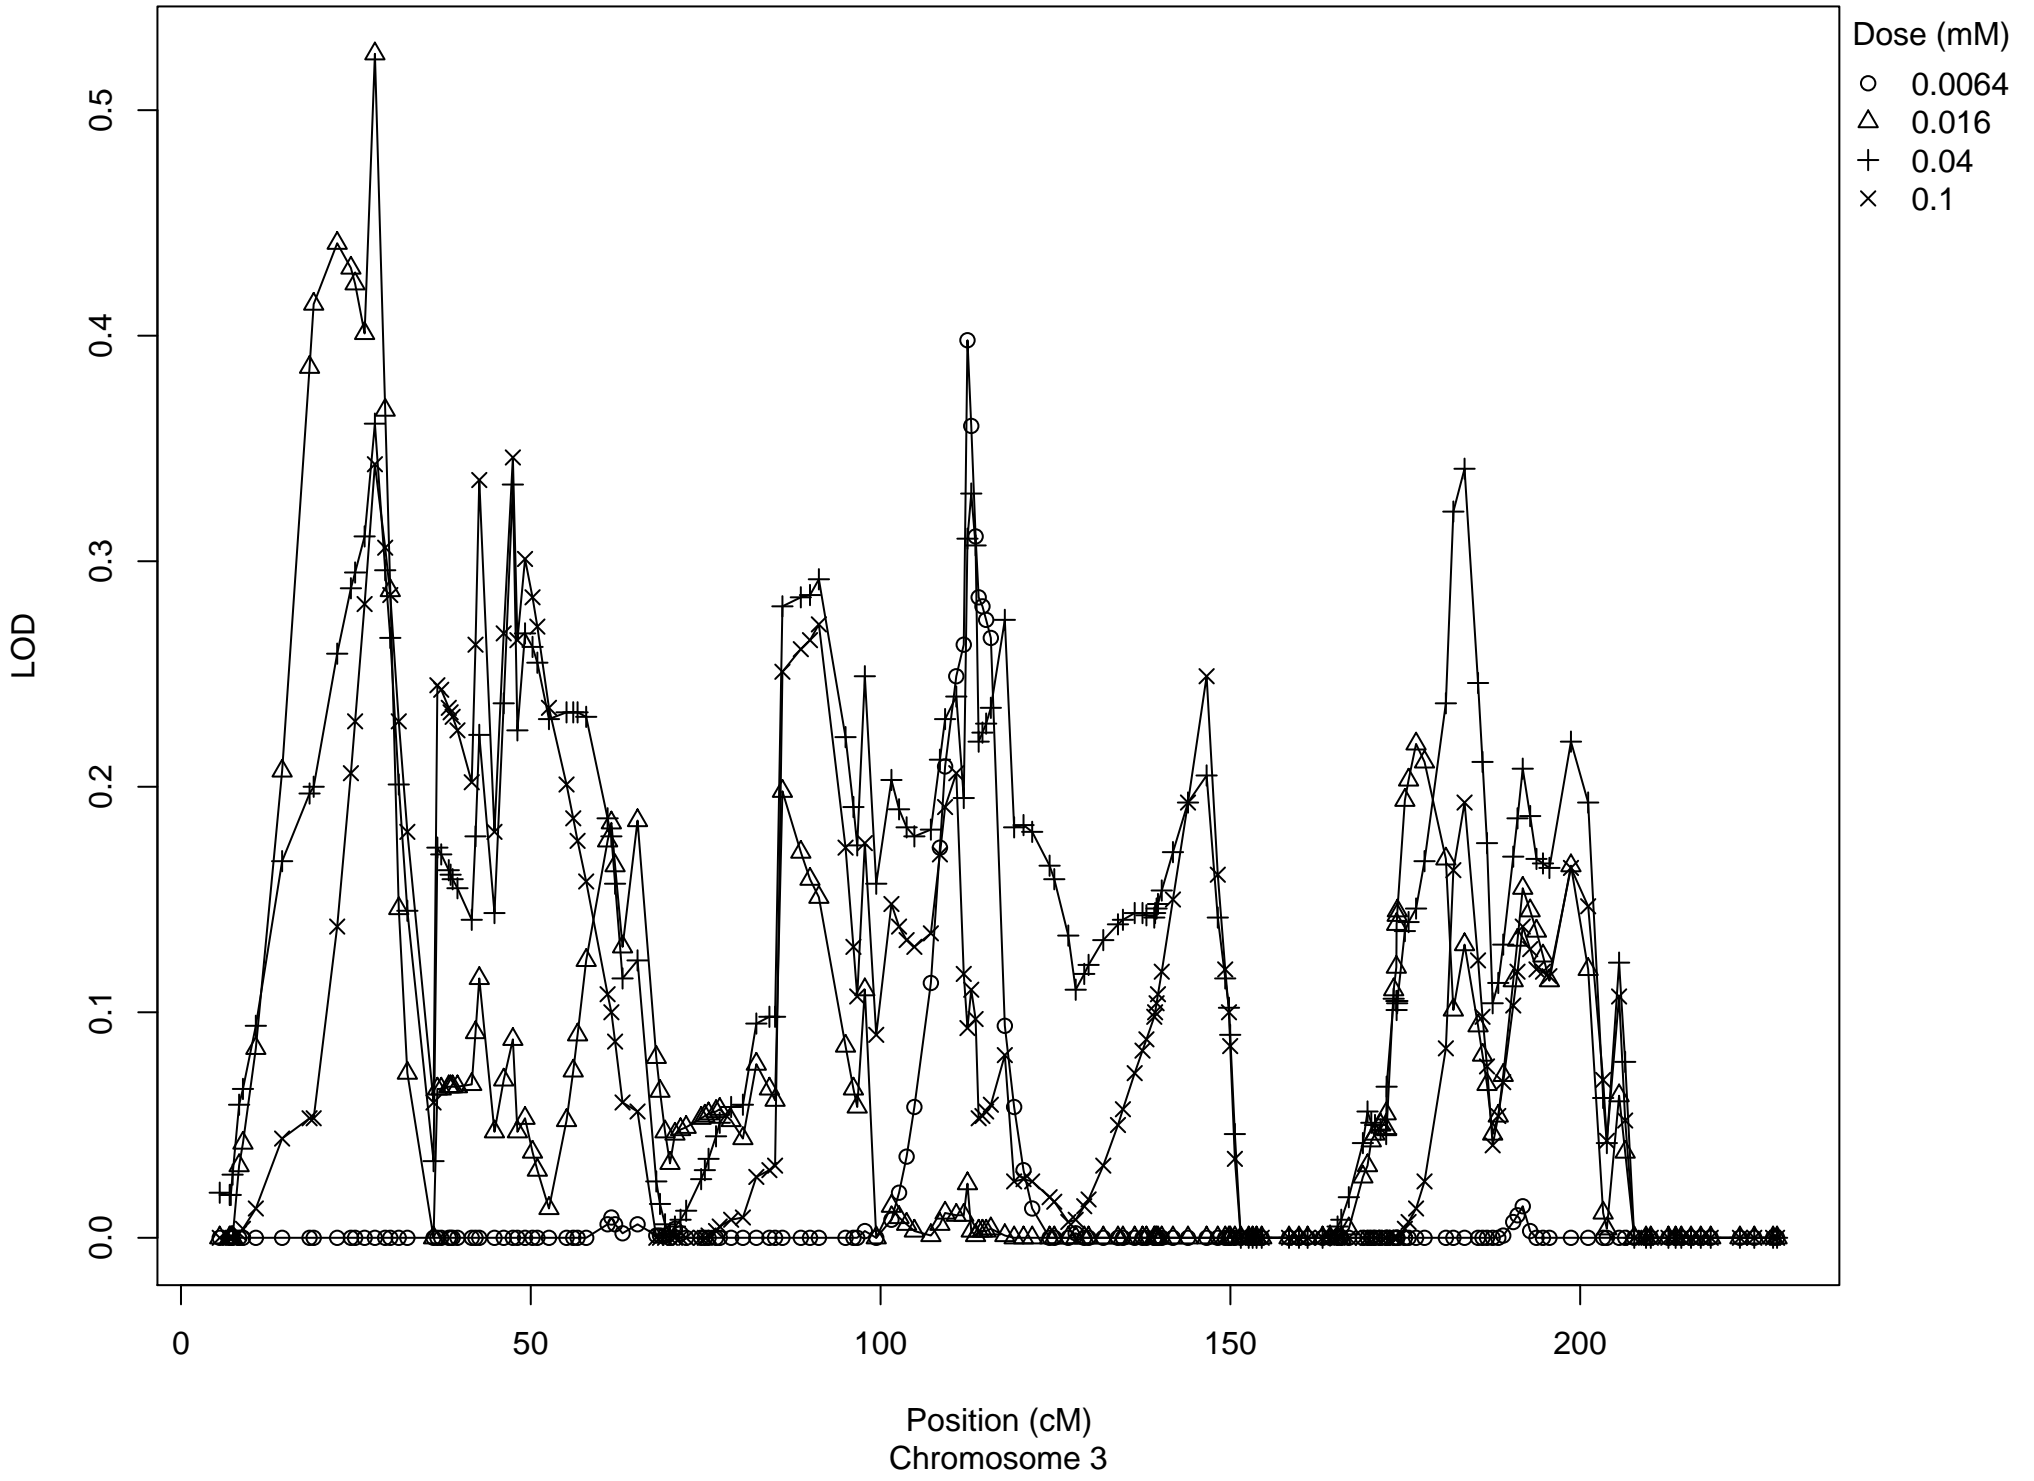

# 2-fluoroadenine-9-beta-d-arabinofuranoside (Flud)

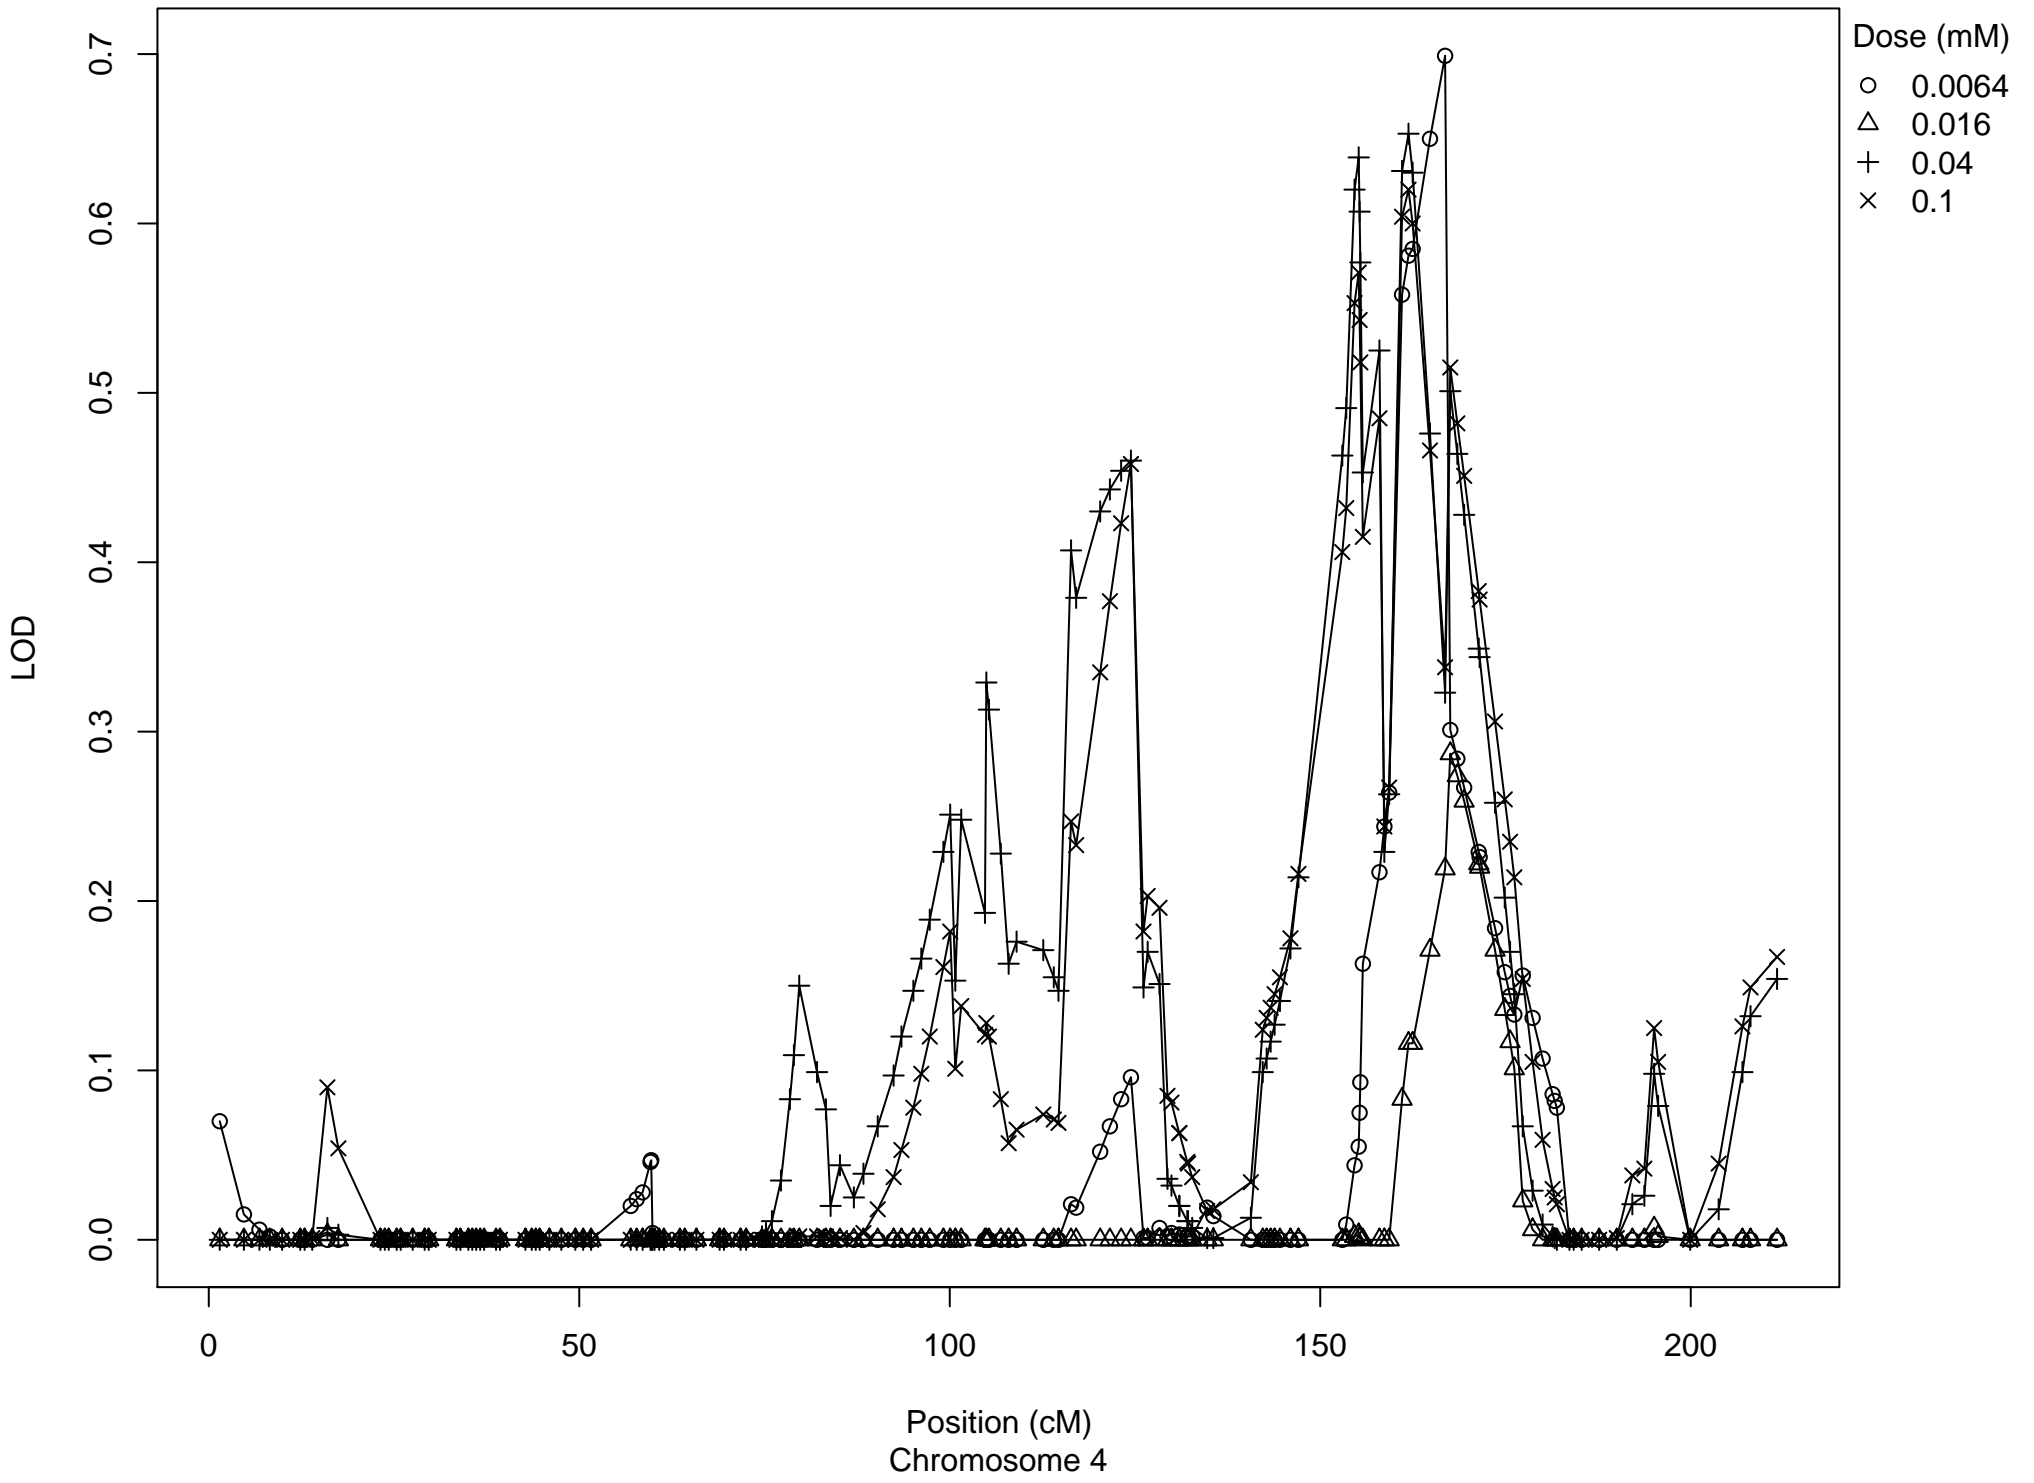

# 2-fluoroadenine-9-beta-d-arabinofuranoside (Flud)

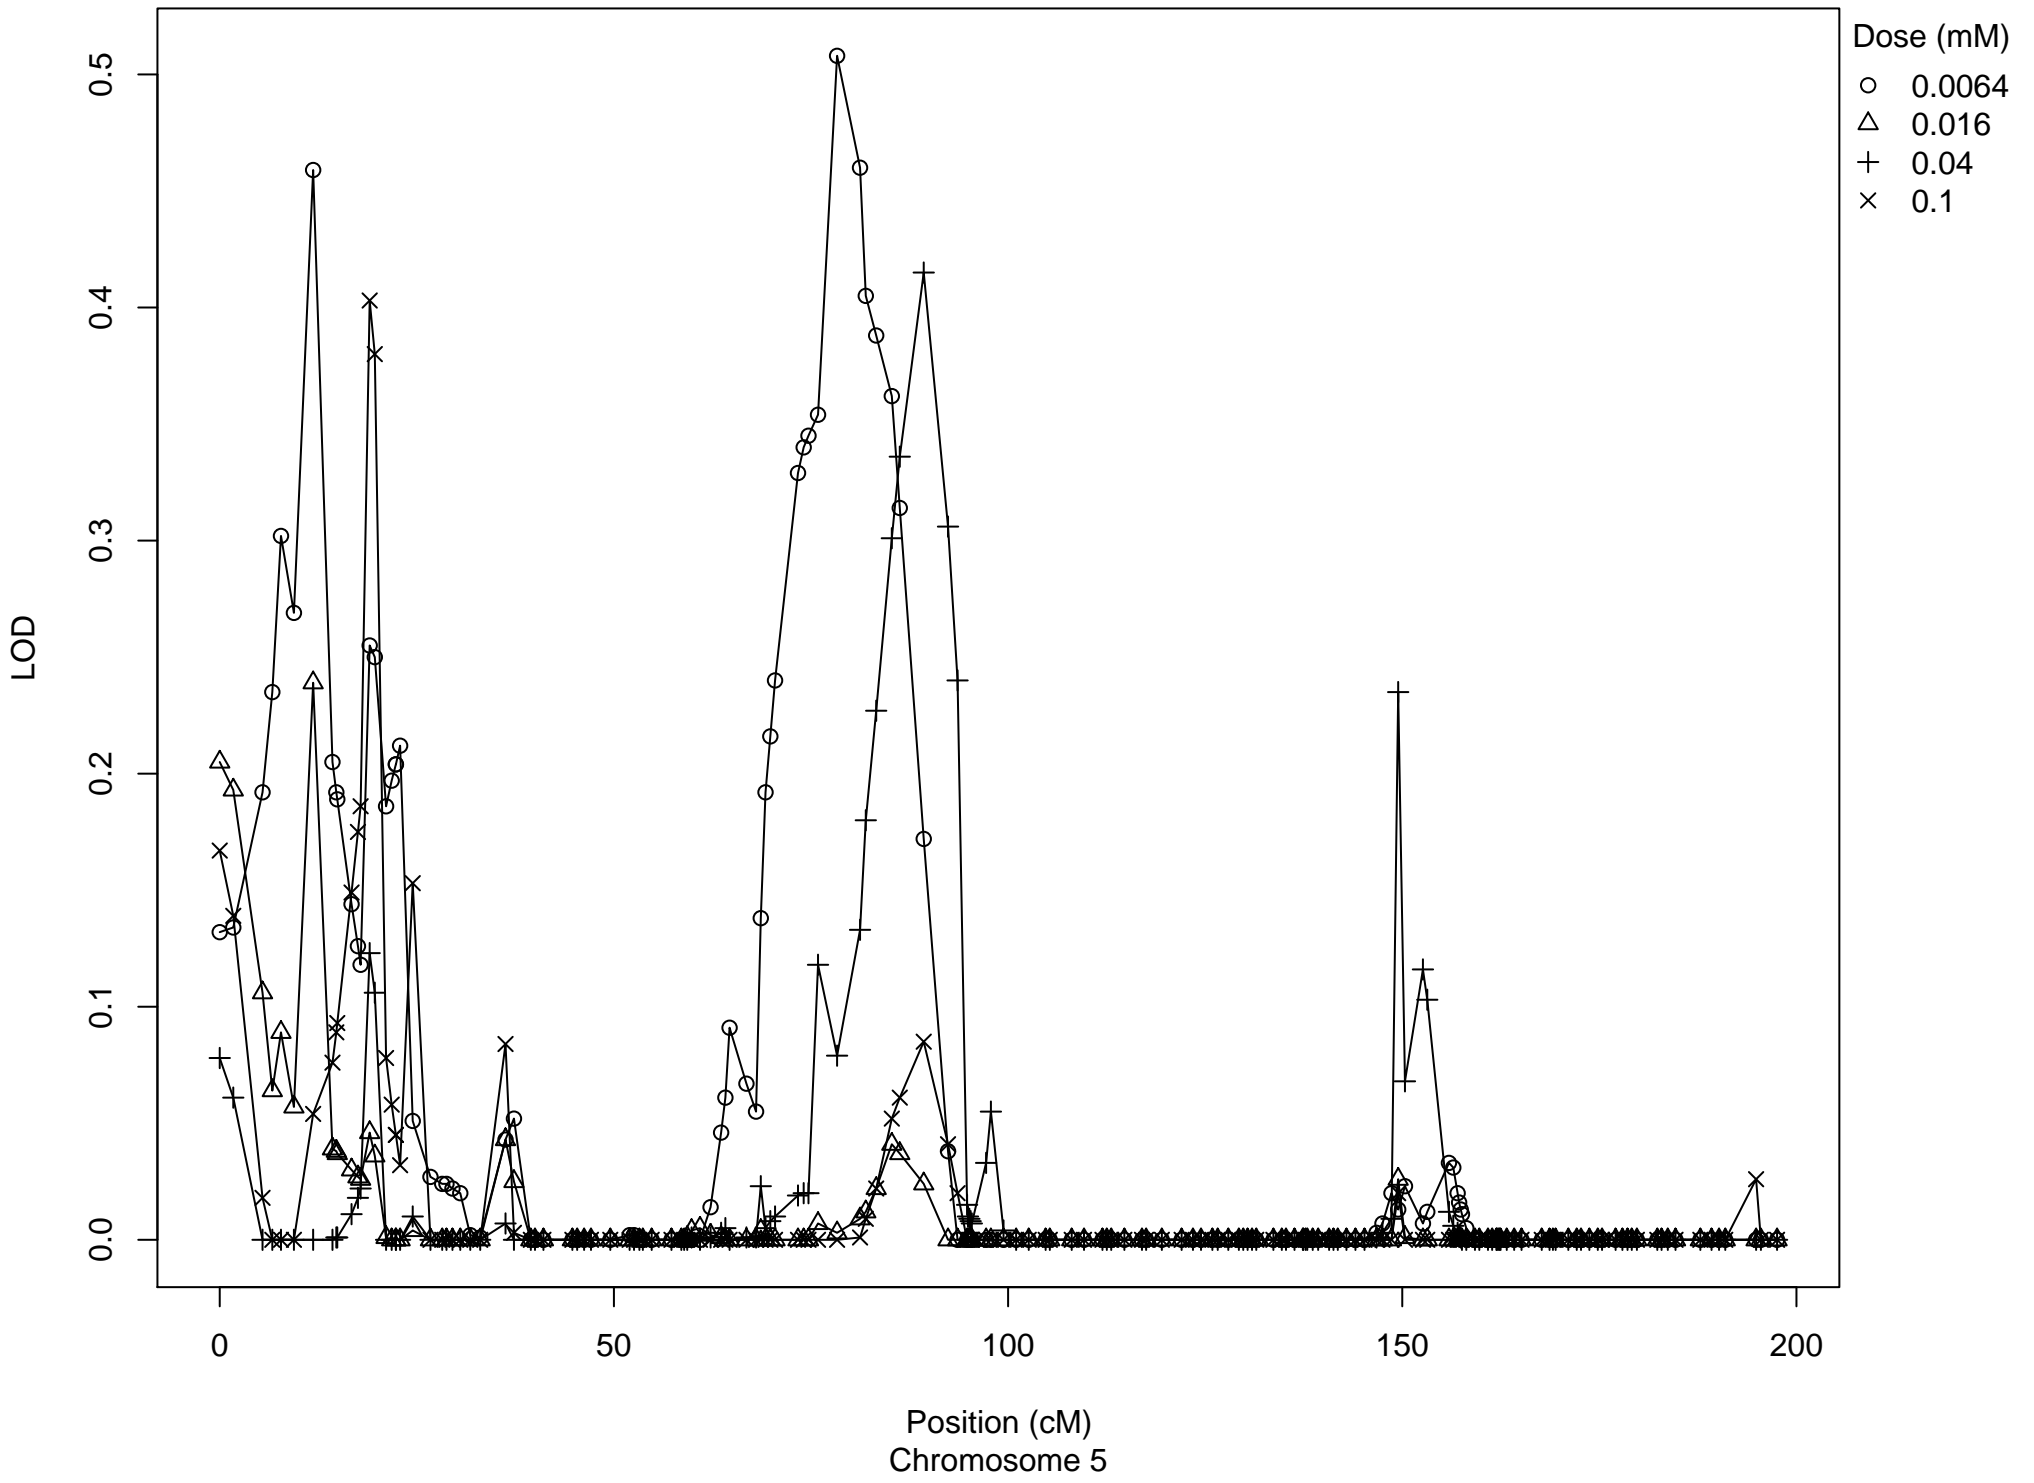

# 2-fluoroadenine-9-beta-d-arabinofuranoside (Flud)

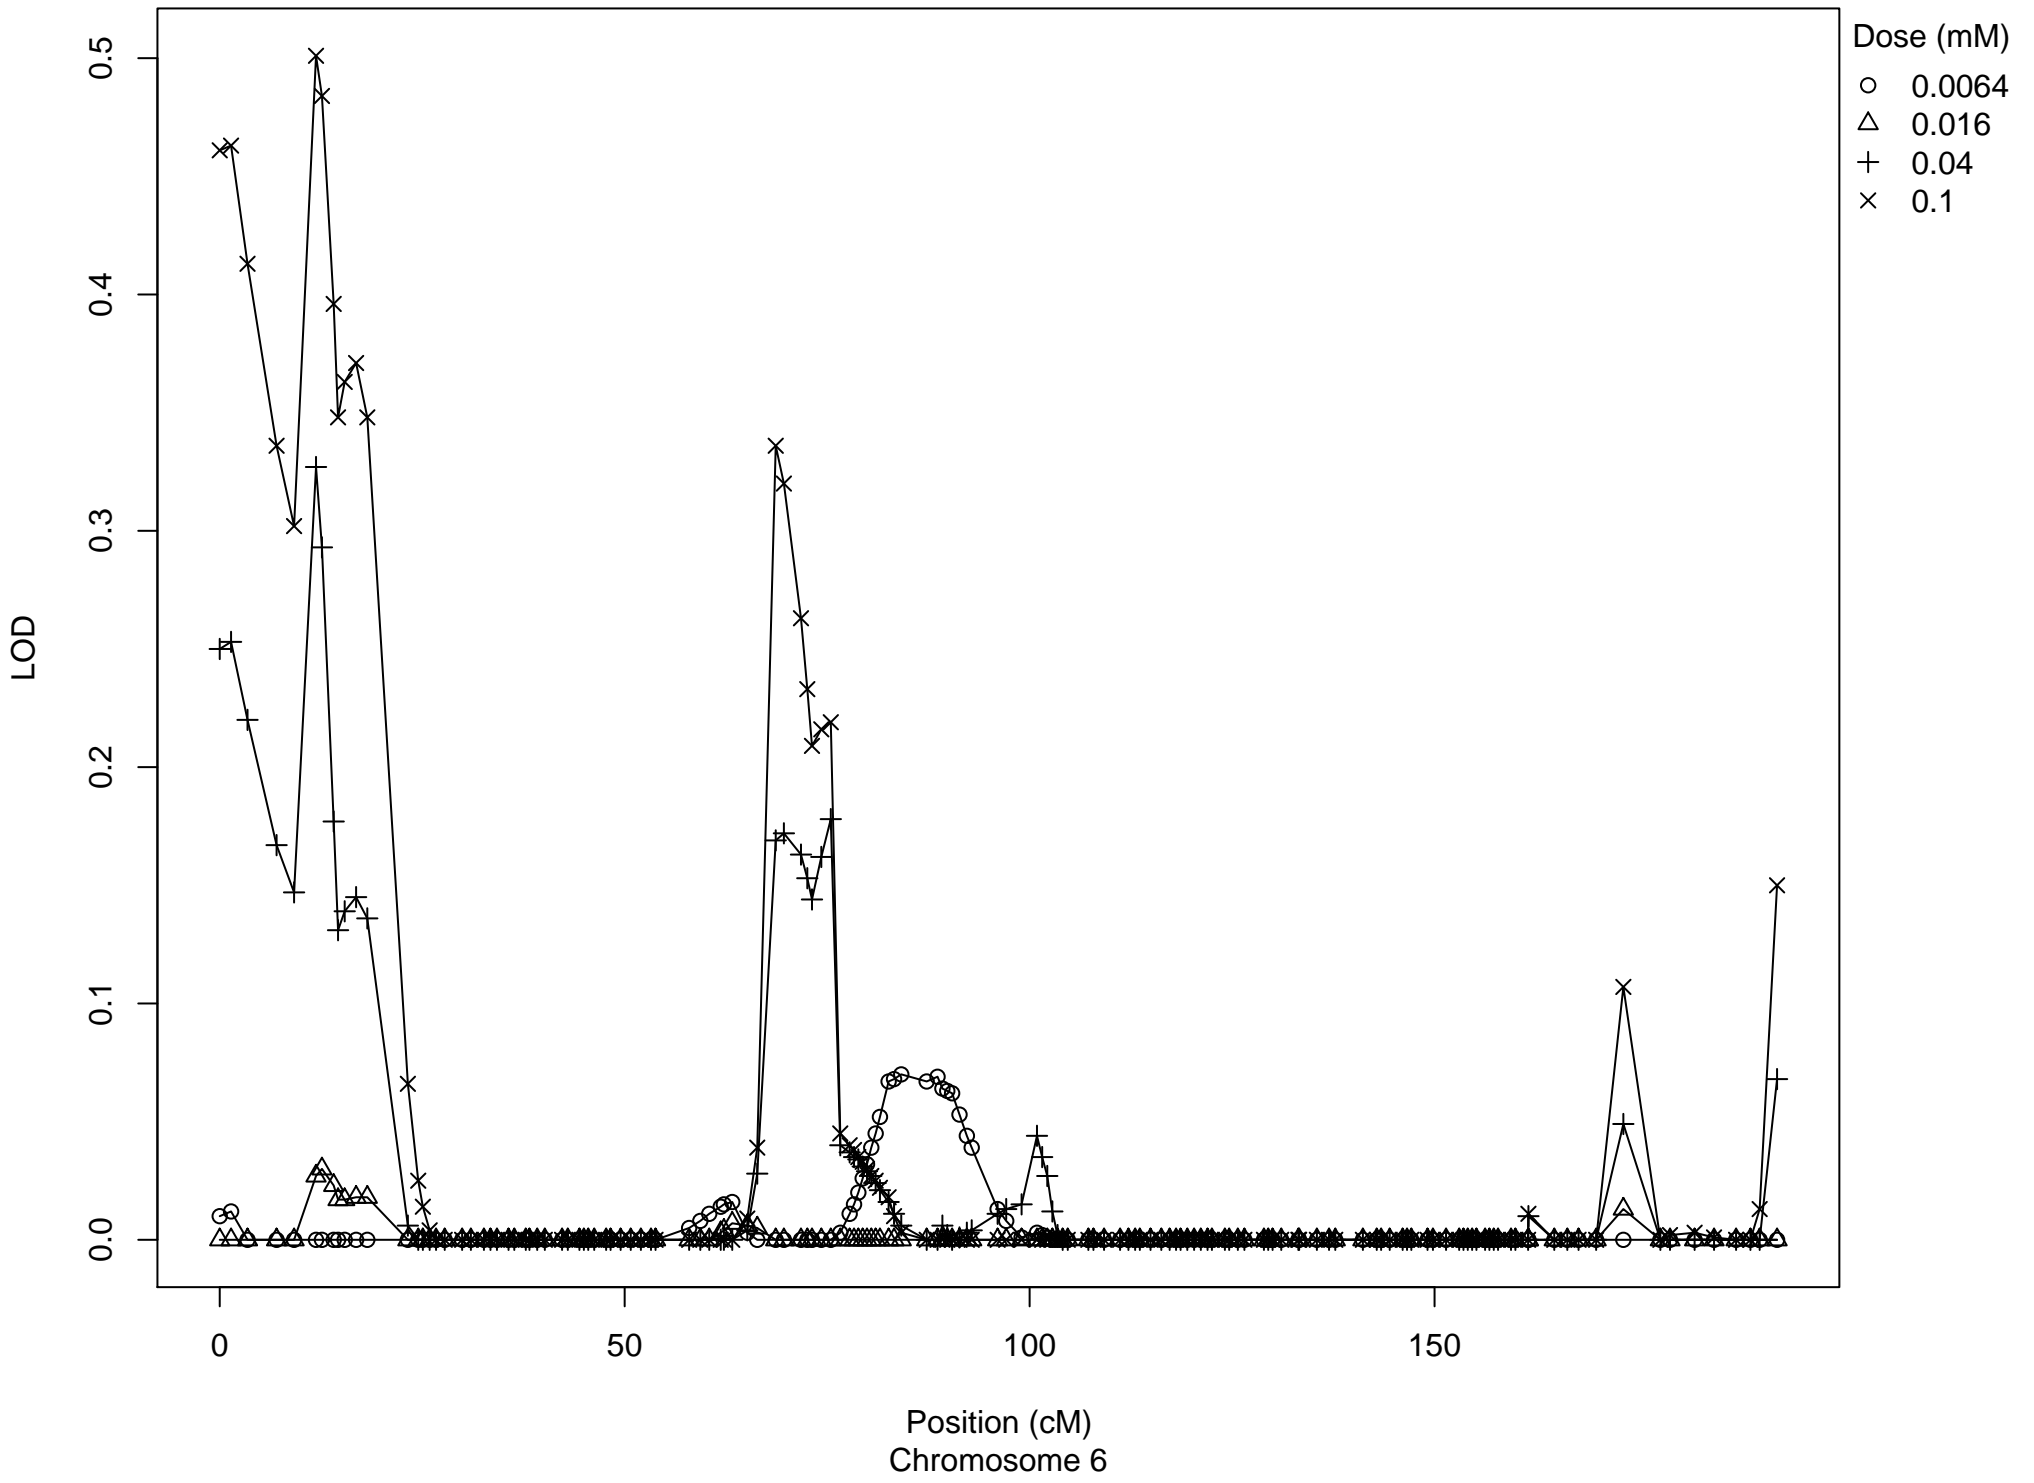

# 2-fluoroadenine-9-beta-d-arabinofuranoside (Flud)

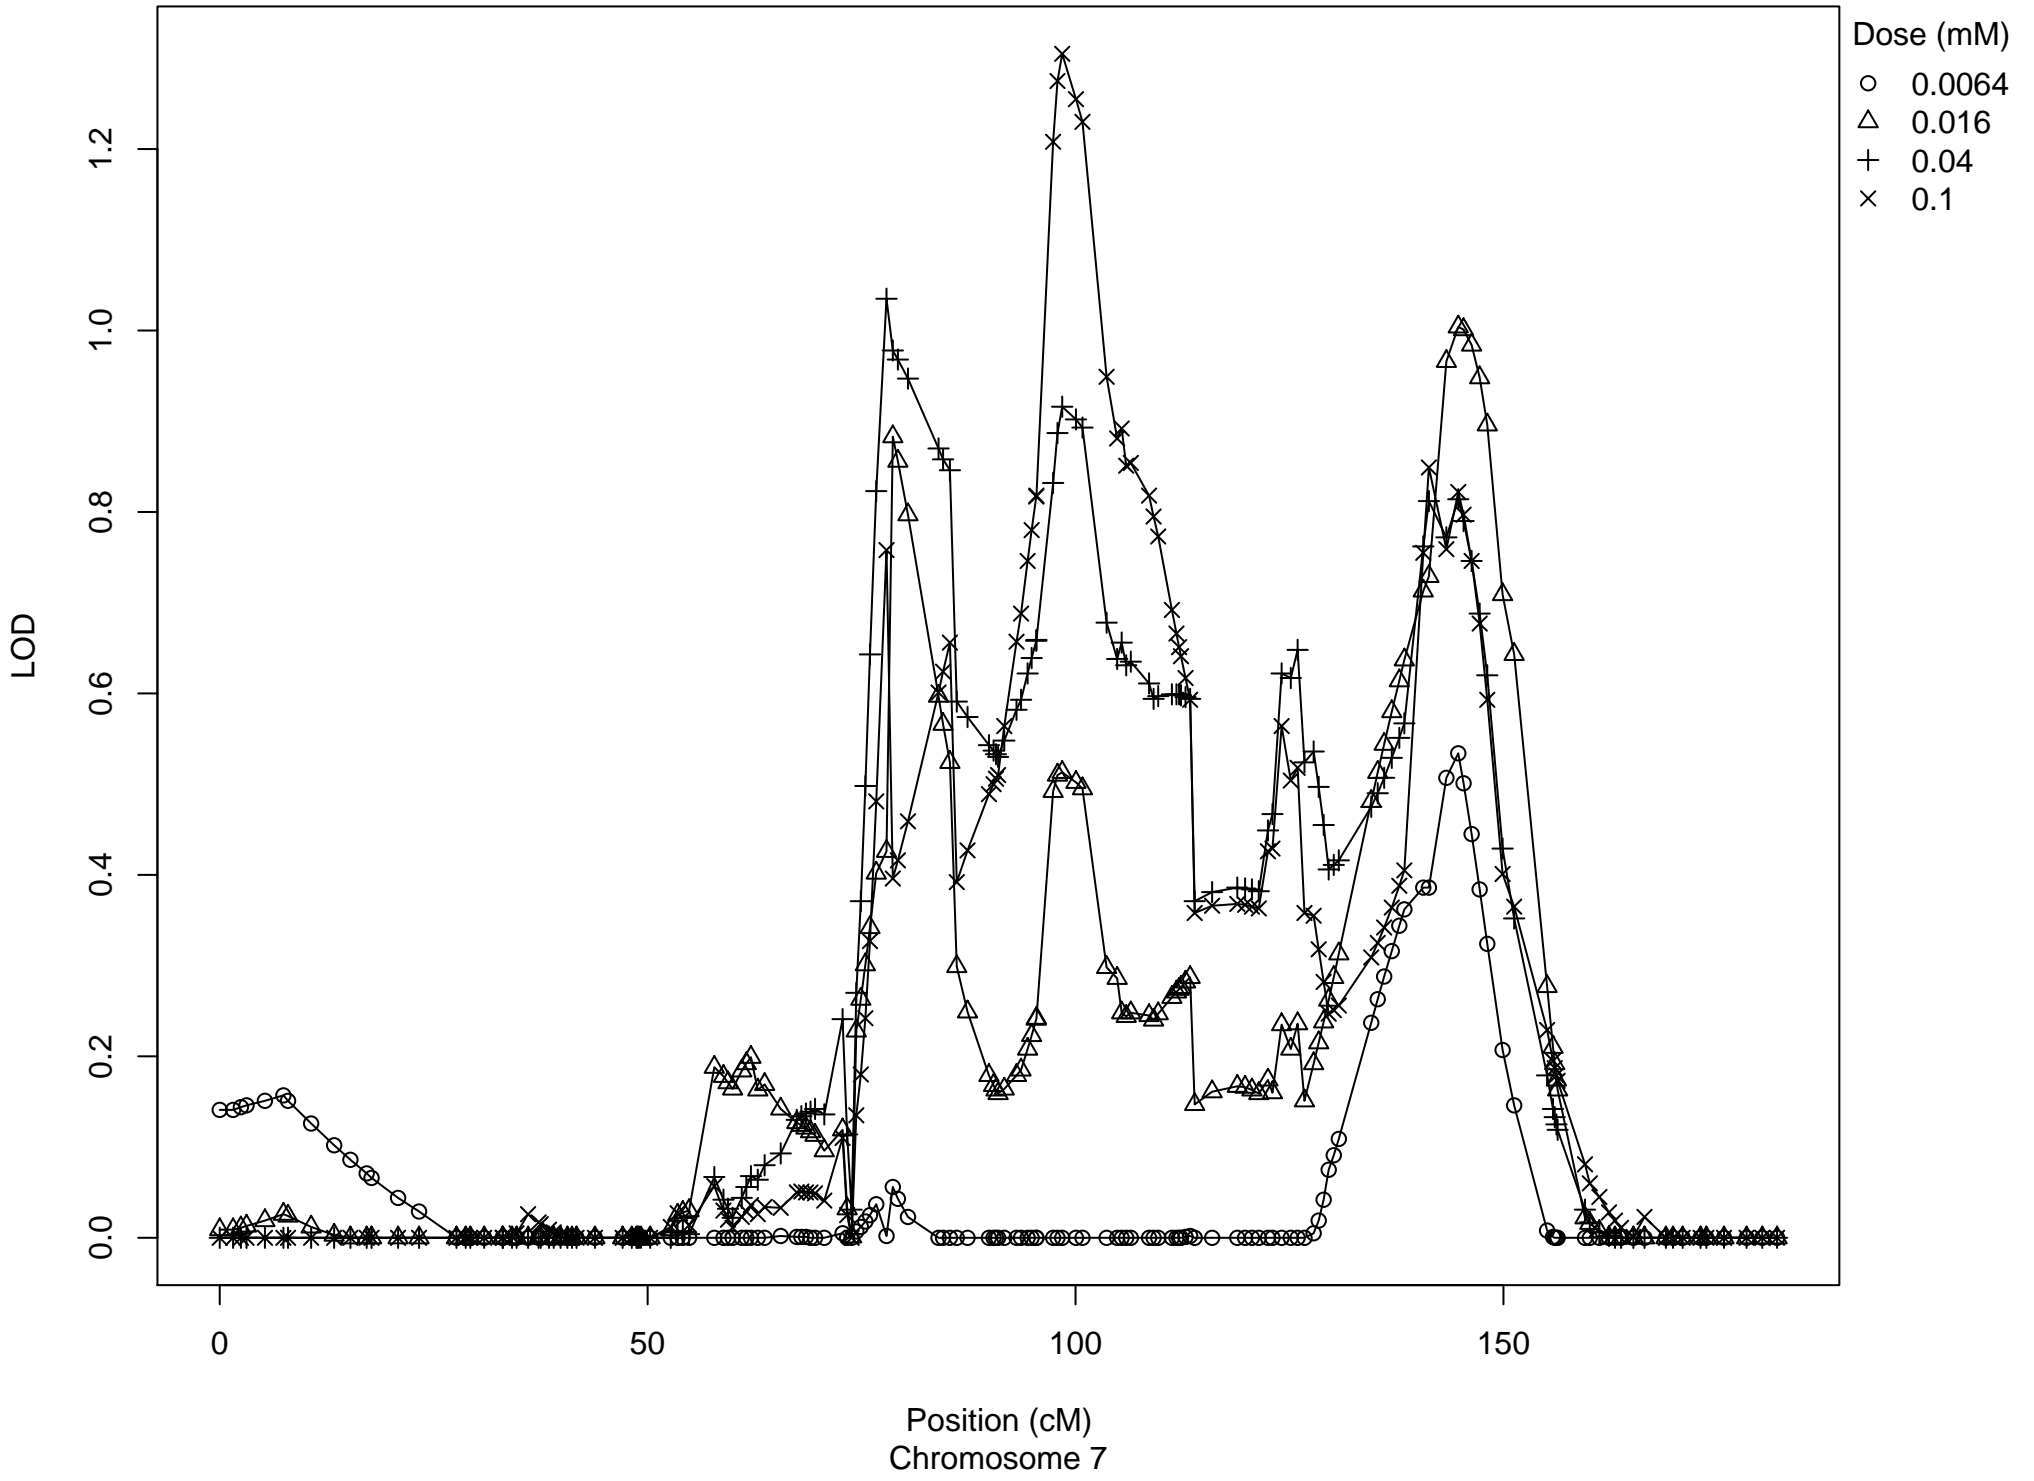

# 2-fluoroadenine-9-beta-d-arabinofuranoside (Flud)

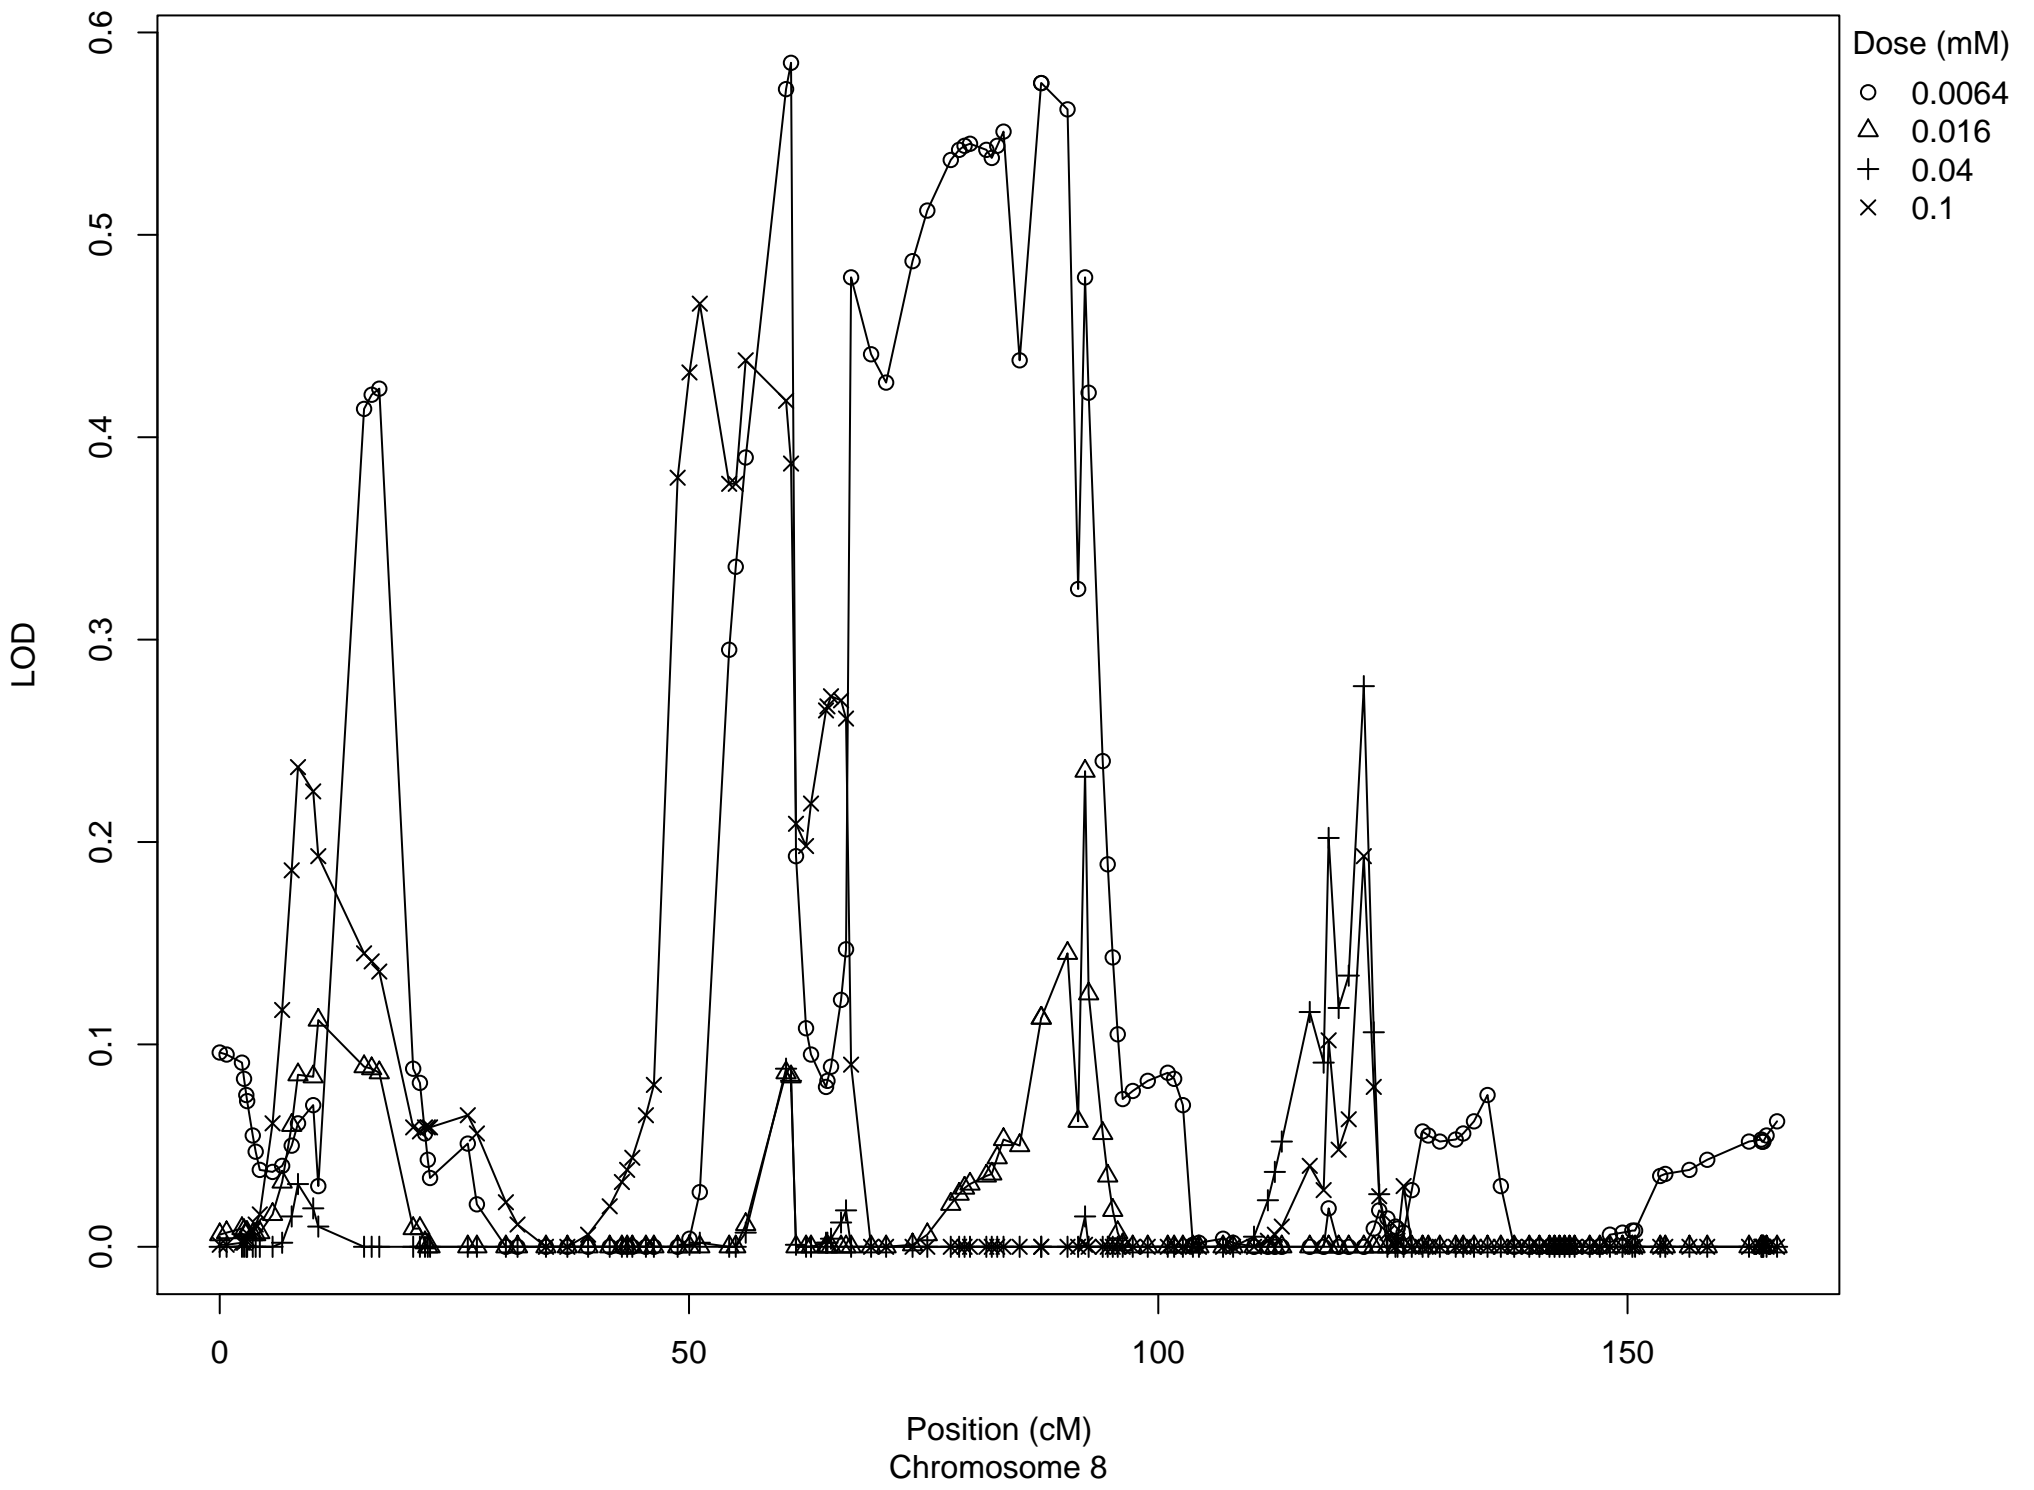

# 2-fluoroadenine-9-beta-d-arabinofuranoside (Flud)

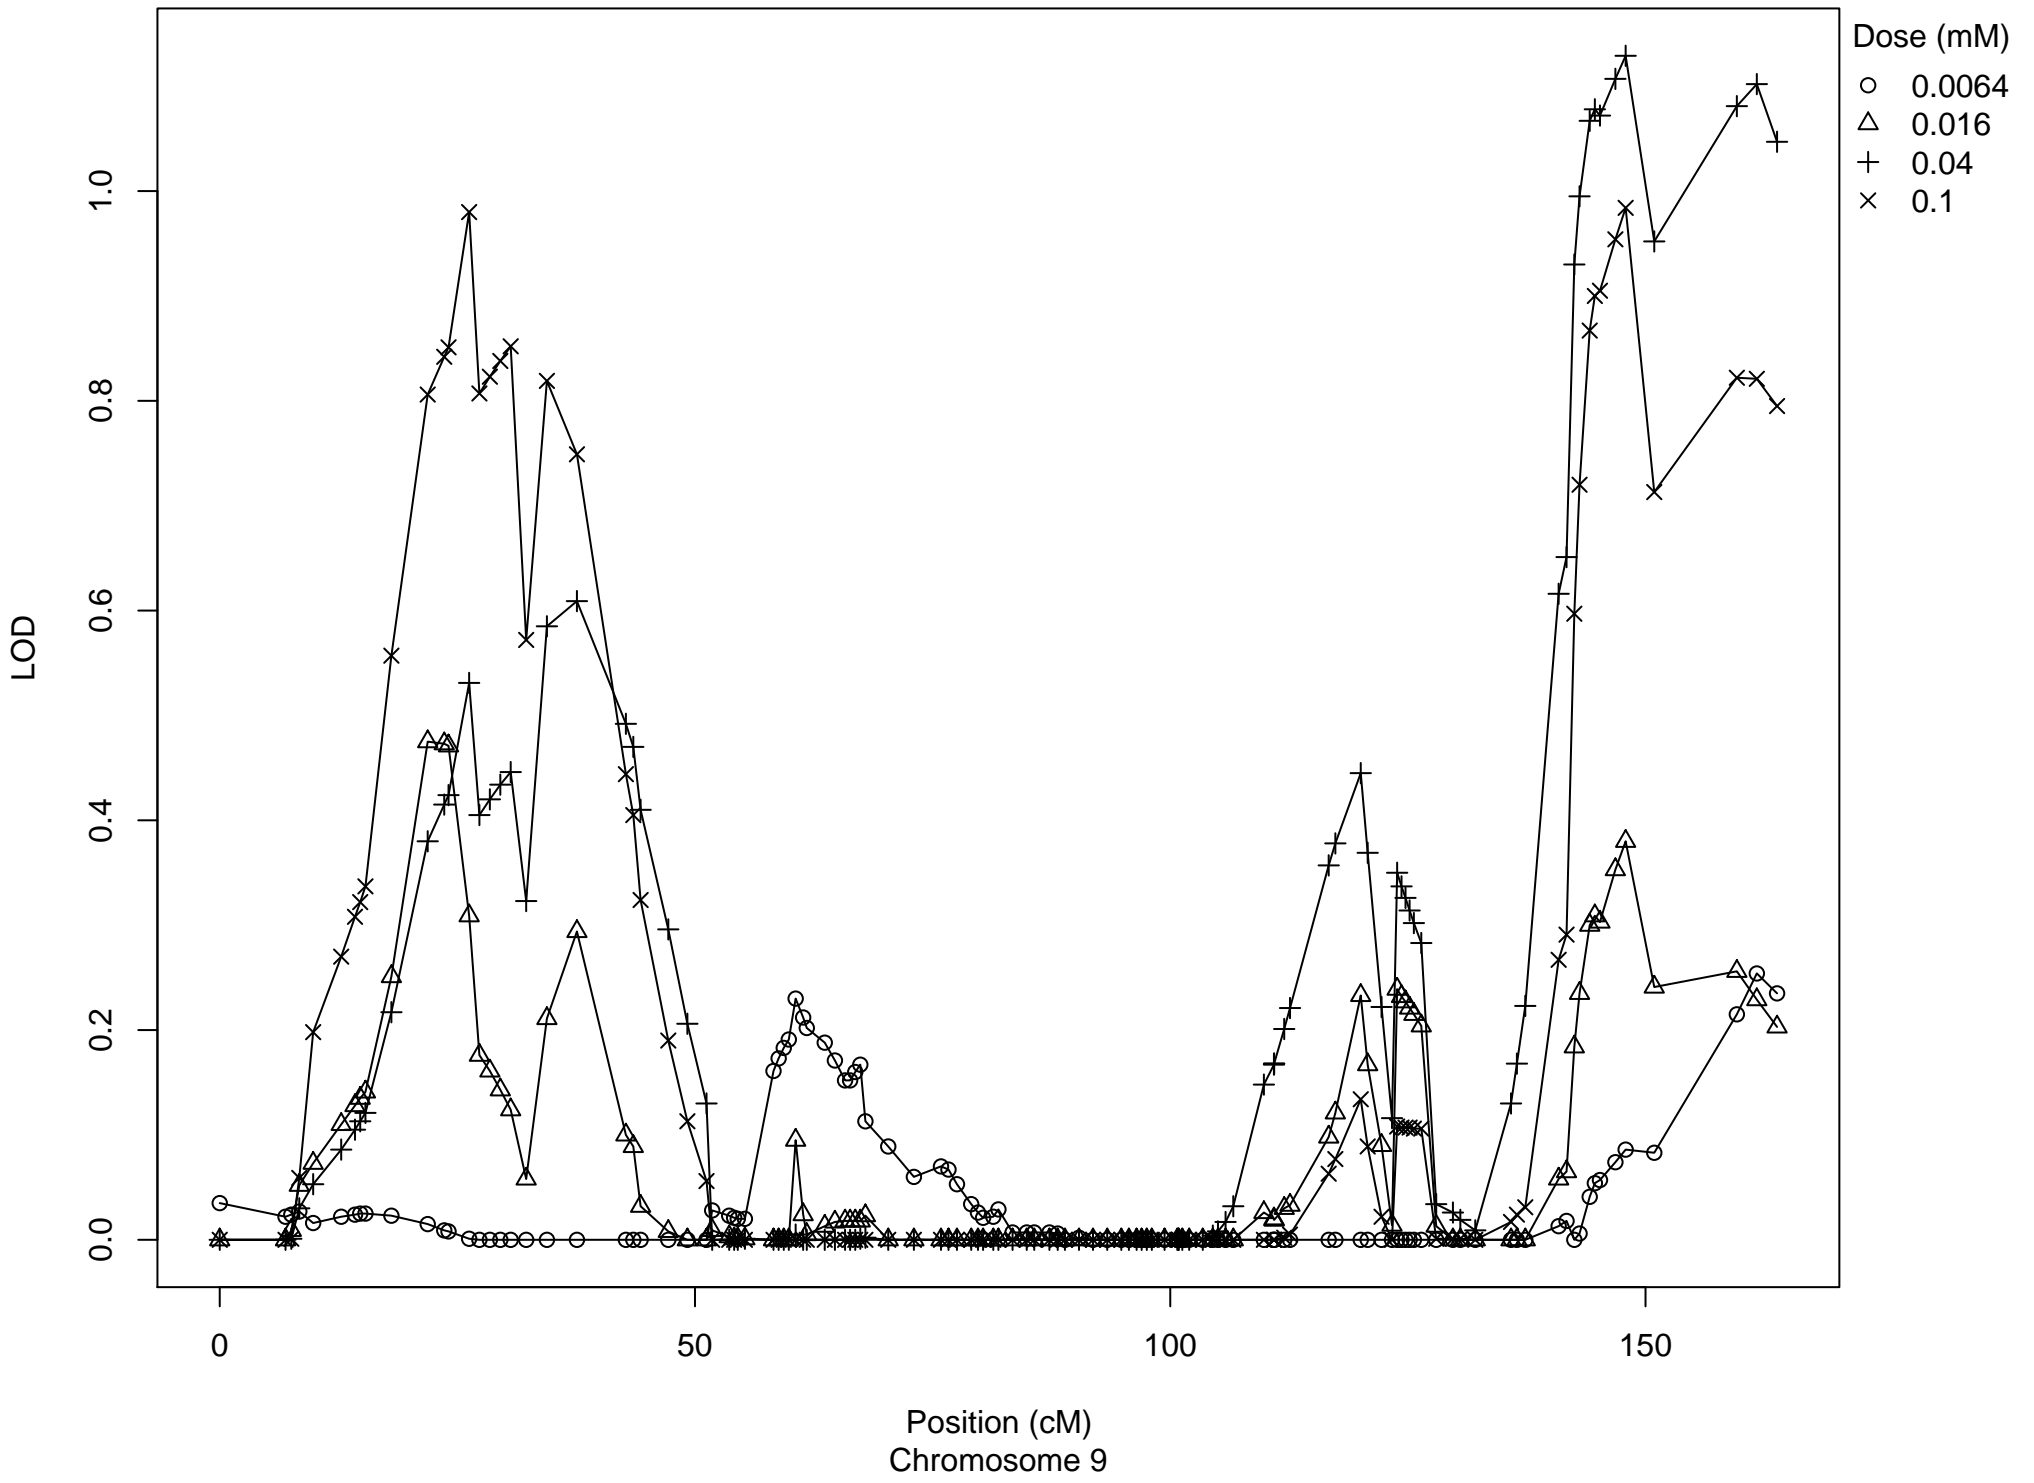

# 2-fluoroadenine-9-beta-d-arabinofuranoside (Flud)

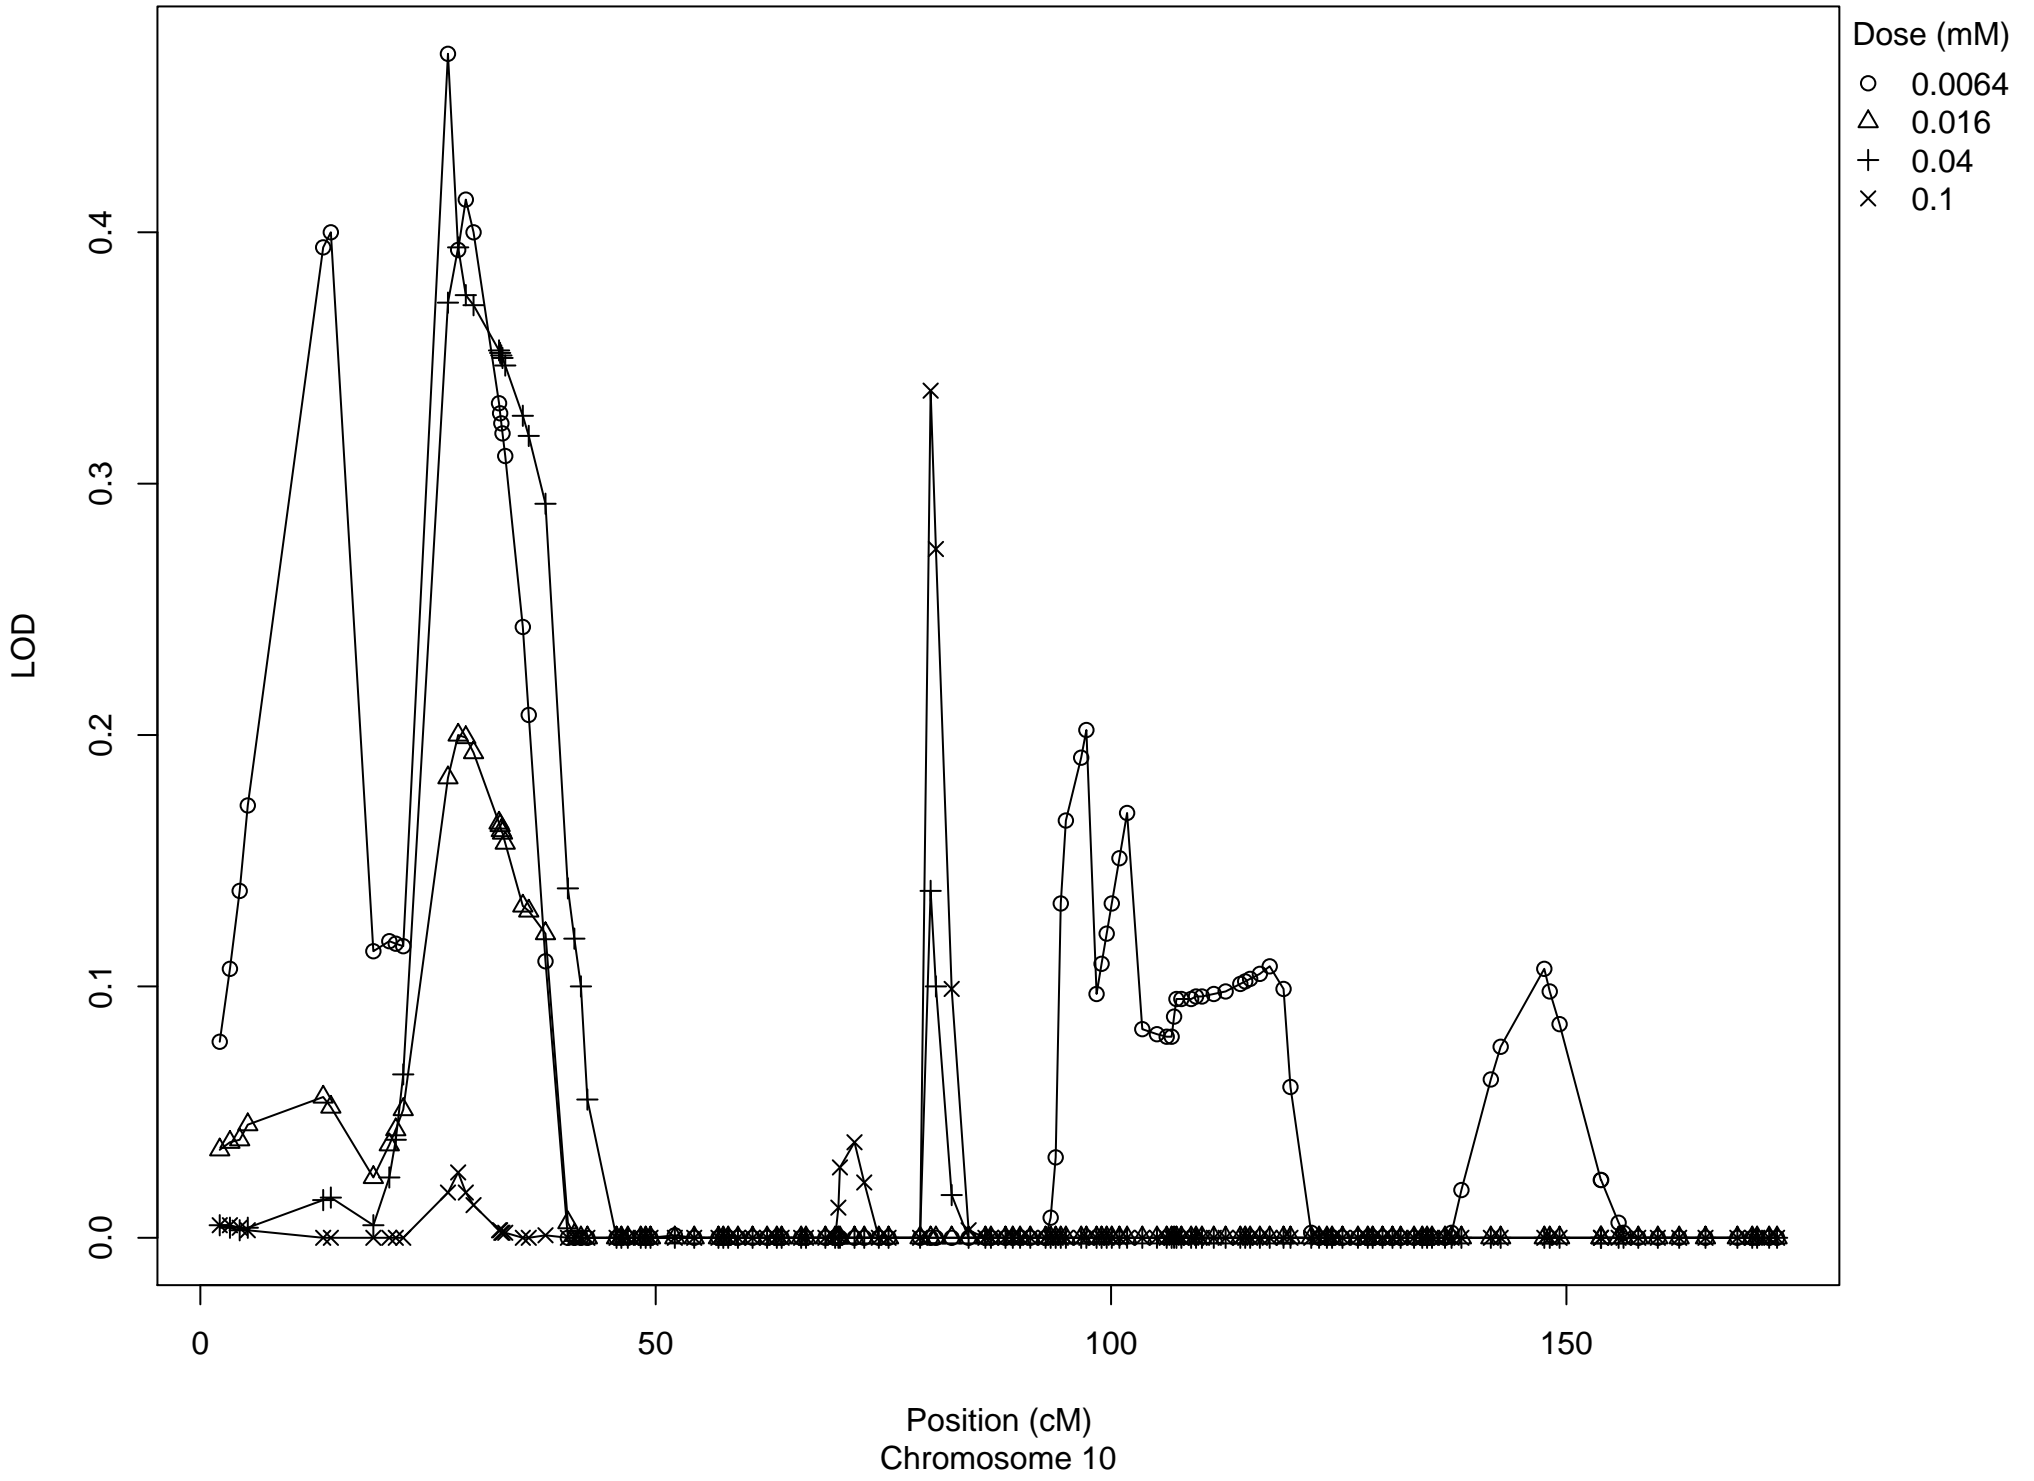



# 2-fluoroadenine-9-beta-d-arabinofuranoside (Flud)

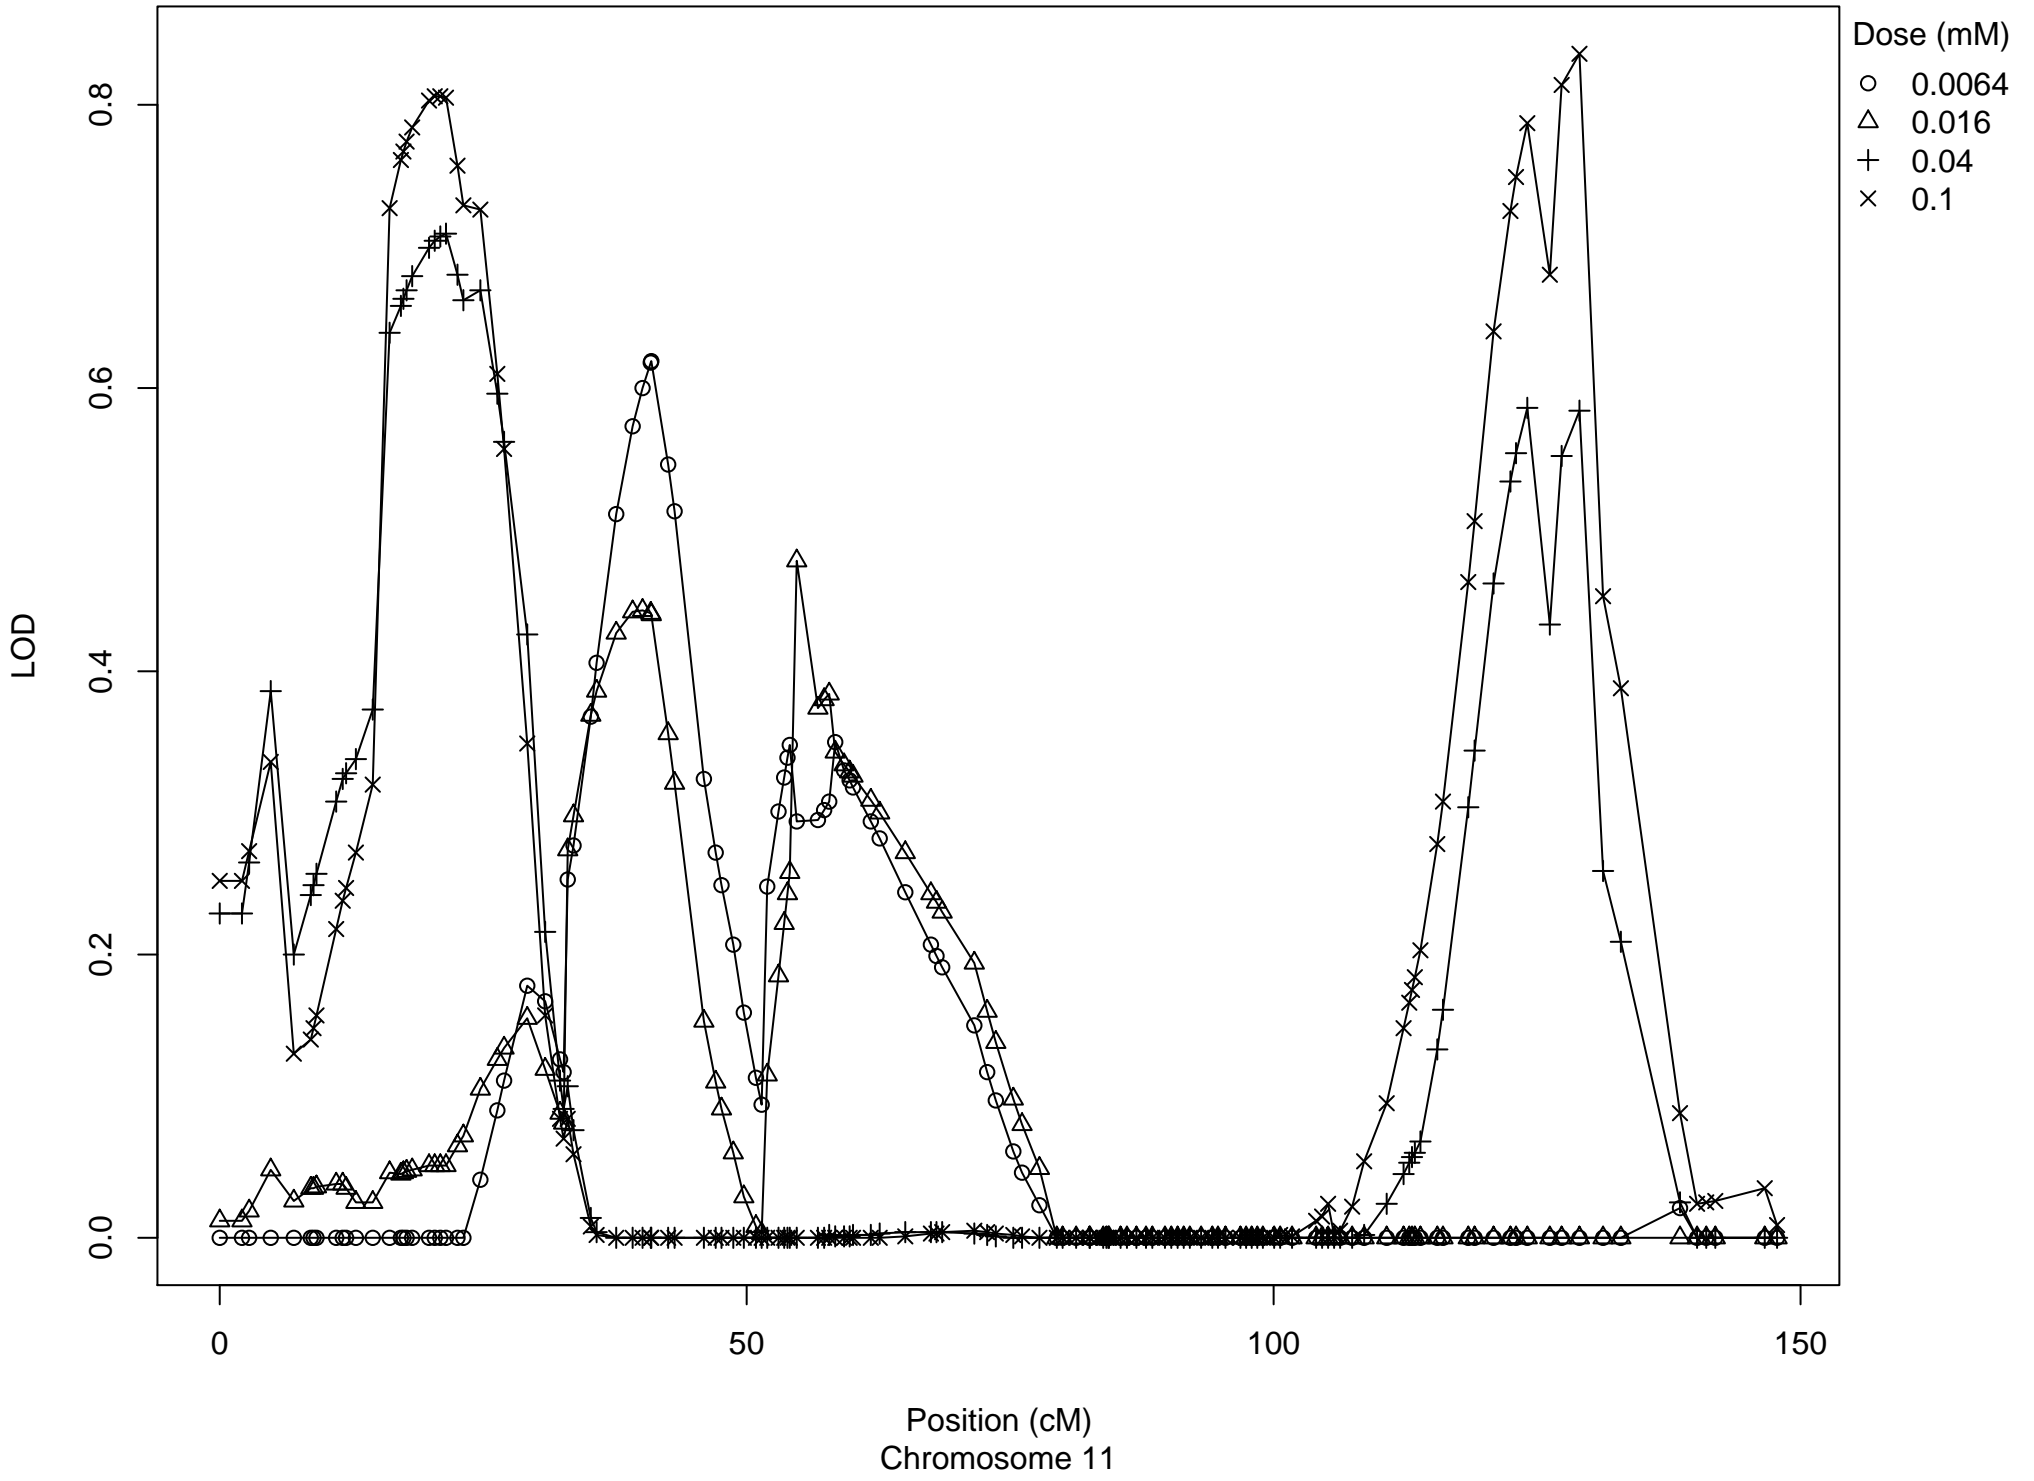

# 2-fluoroadenine-9-beta-d-arabinofuranoside (Flud)

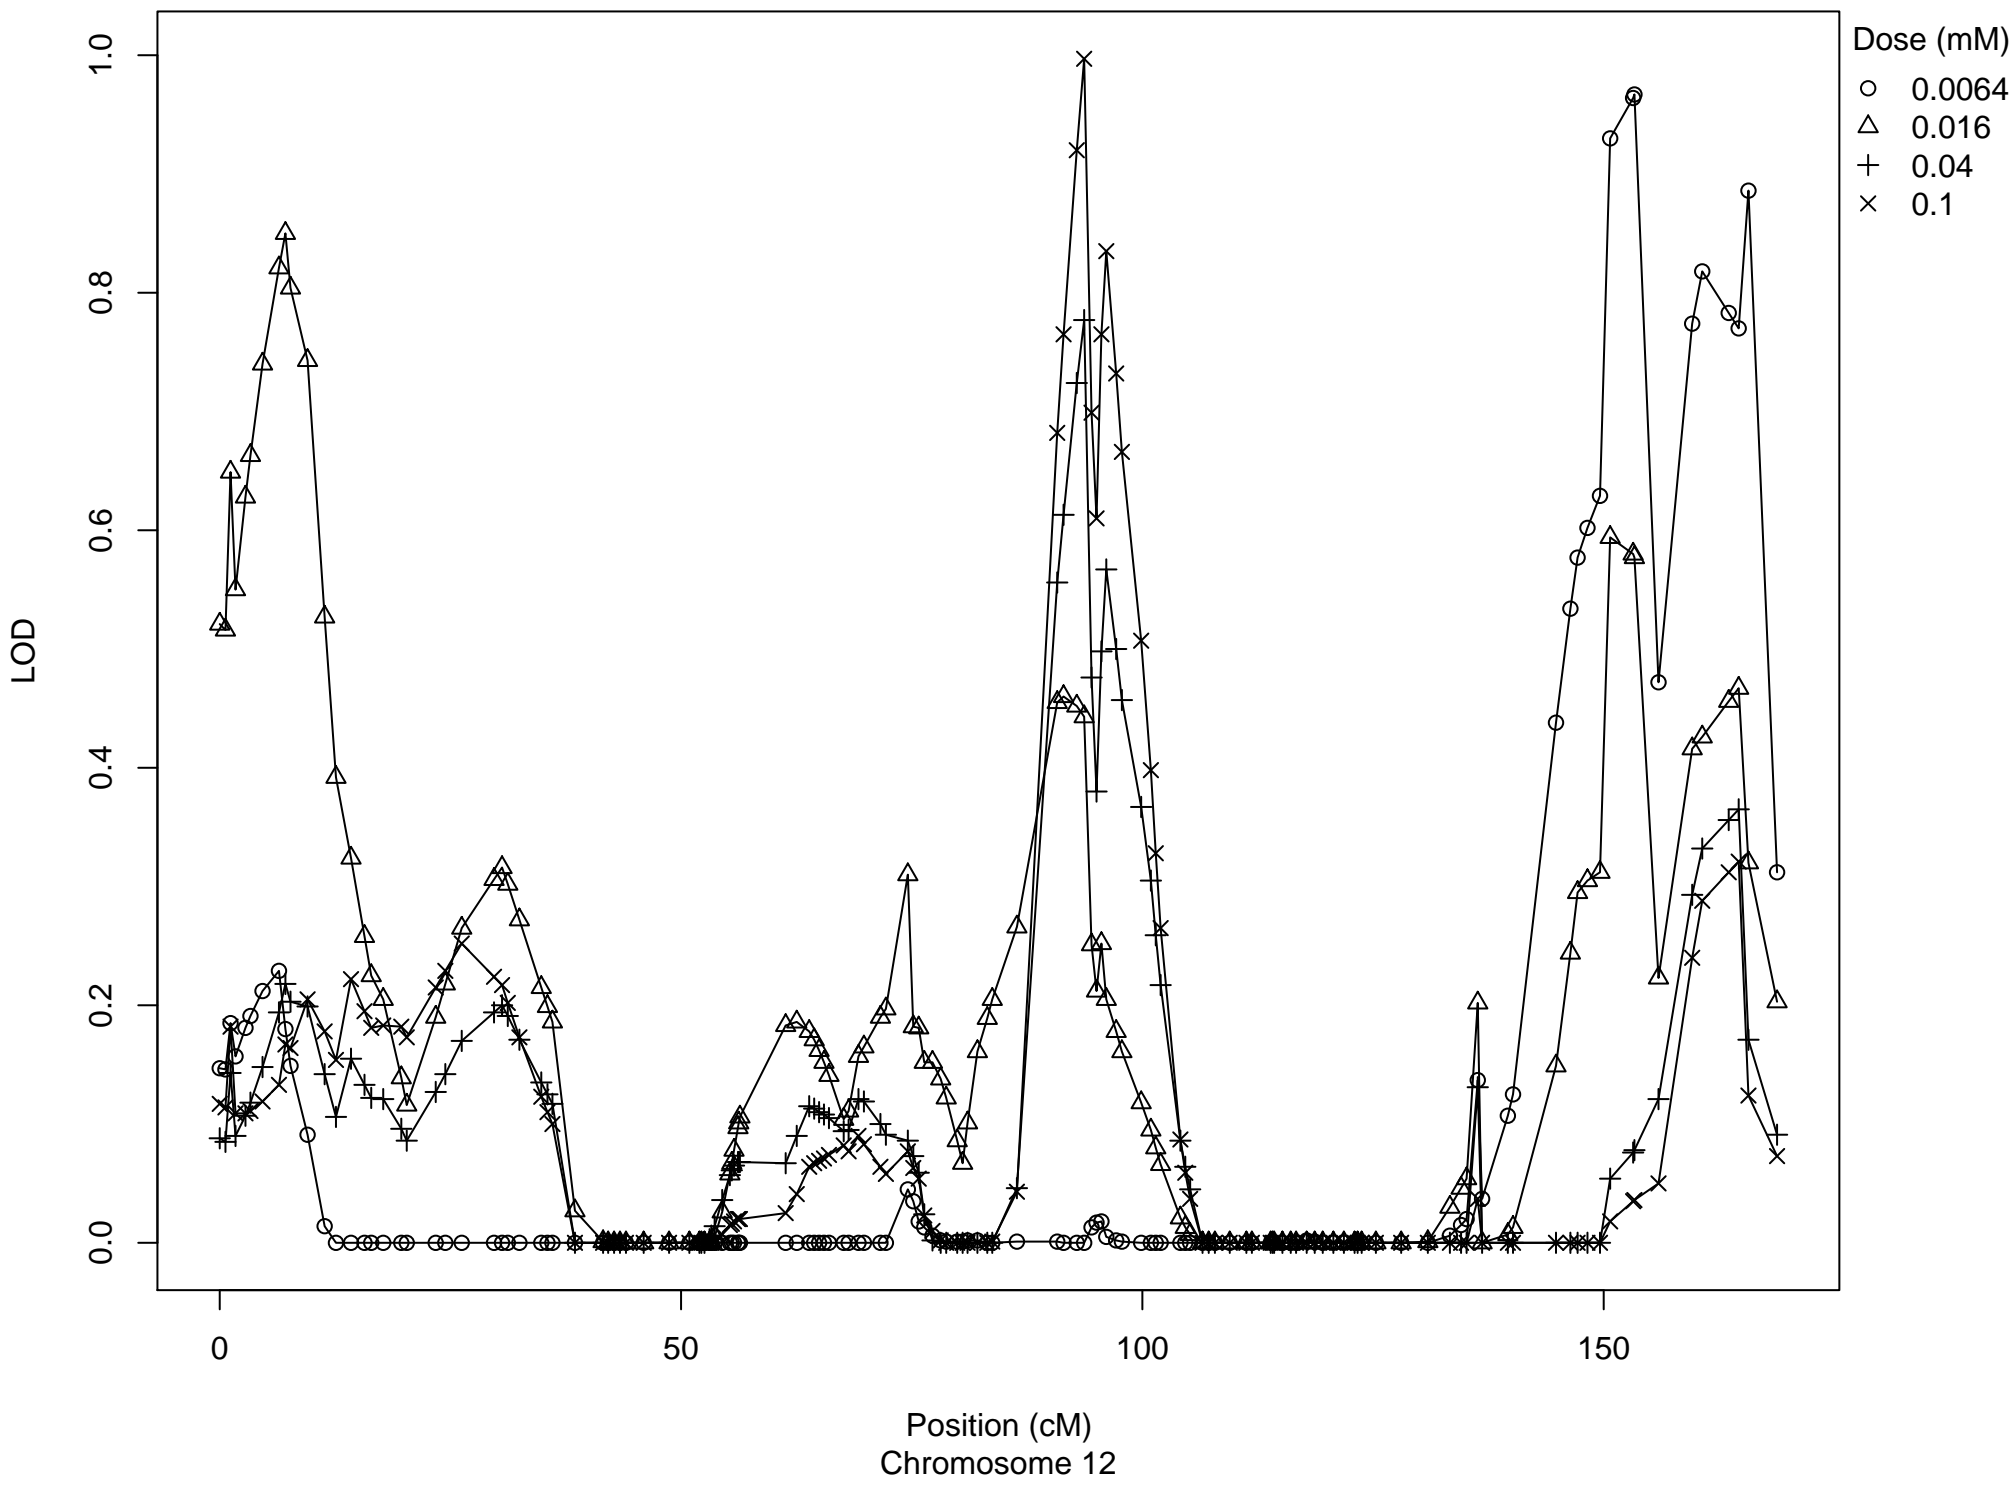

# 2-fluoroadenine-9-beta-d-arabinofuranoside (Flud)

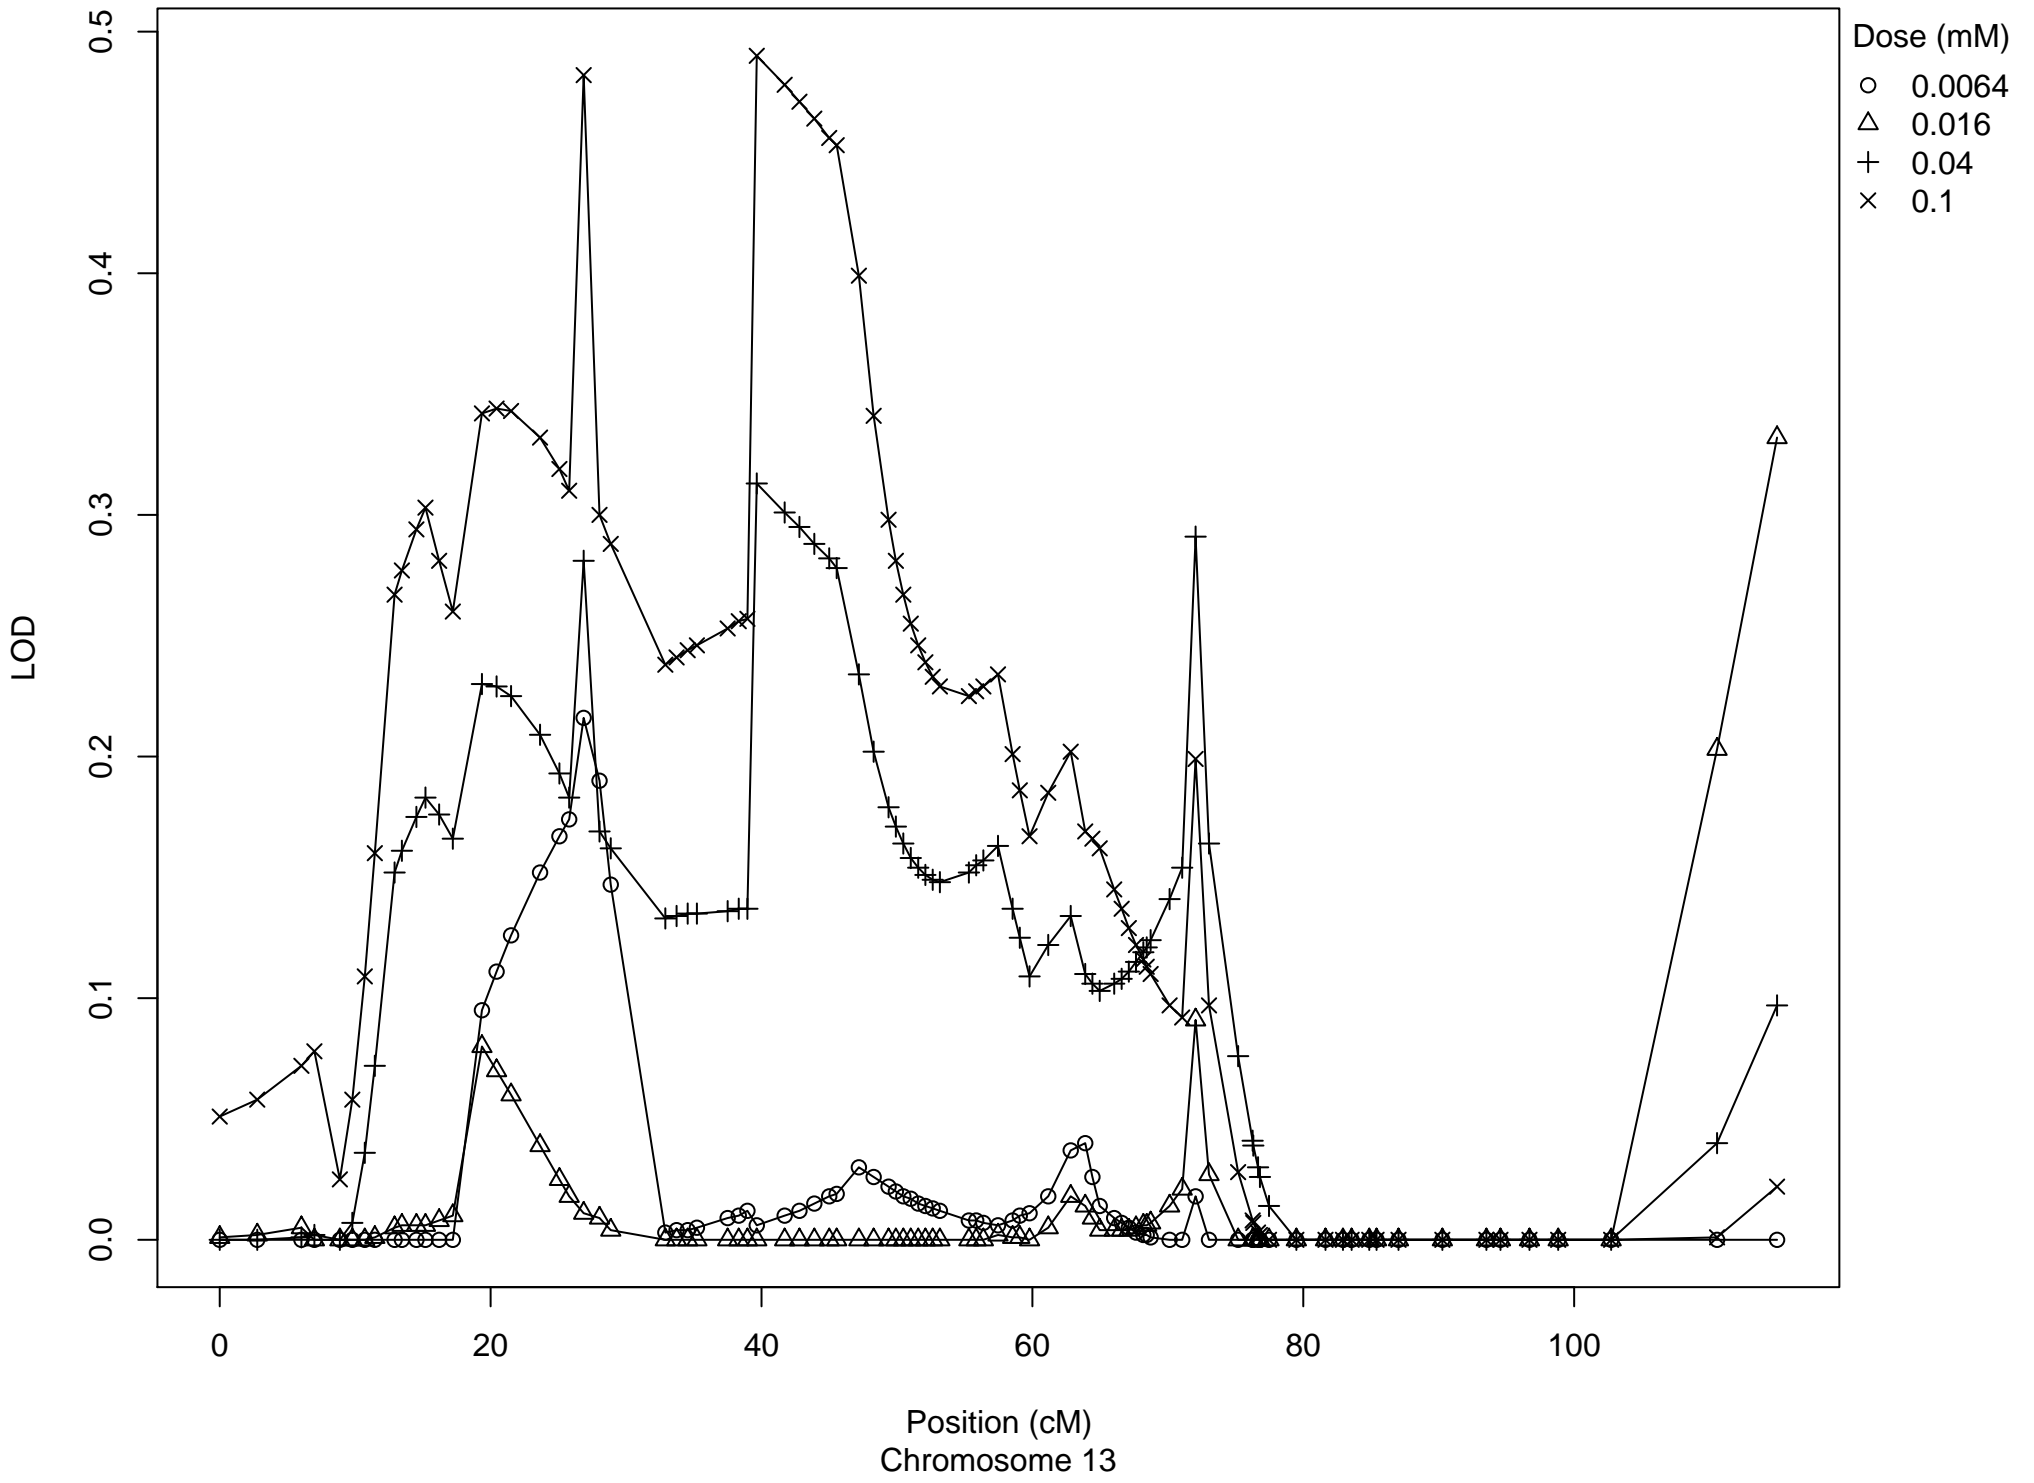

# 2-fluoroadenine-9-beta-d-arabinofuranoside (Flud)

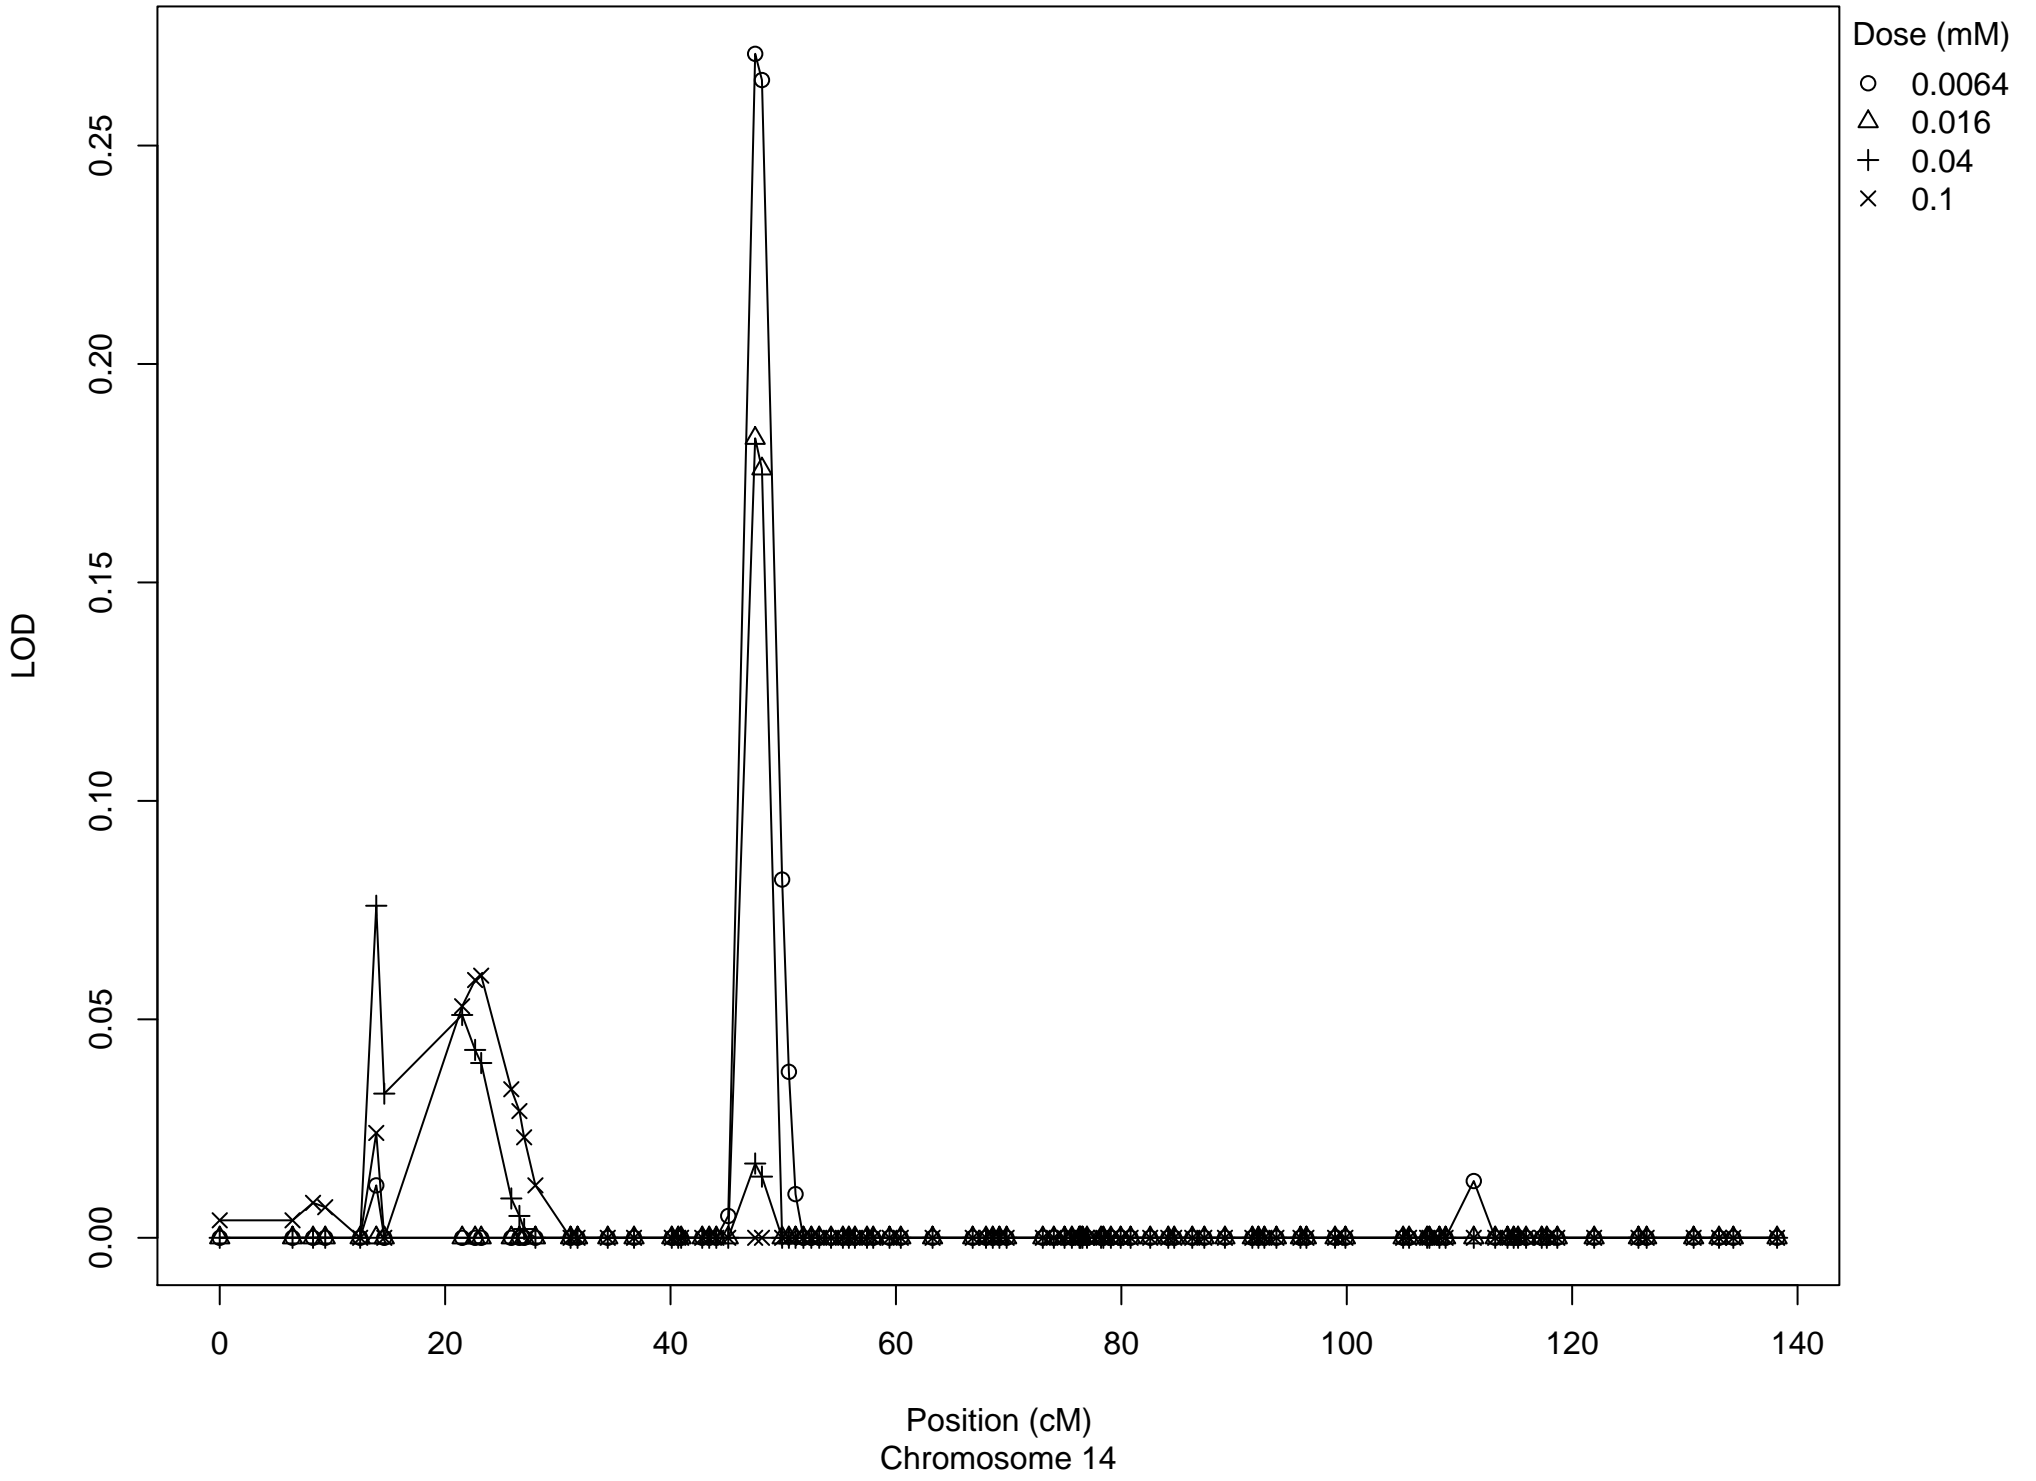

# 2-fluoroadenine-9-beta-d-arabinofuranoside (Flud)

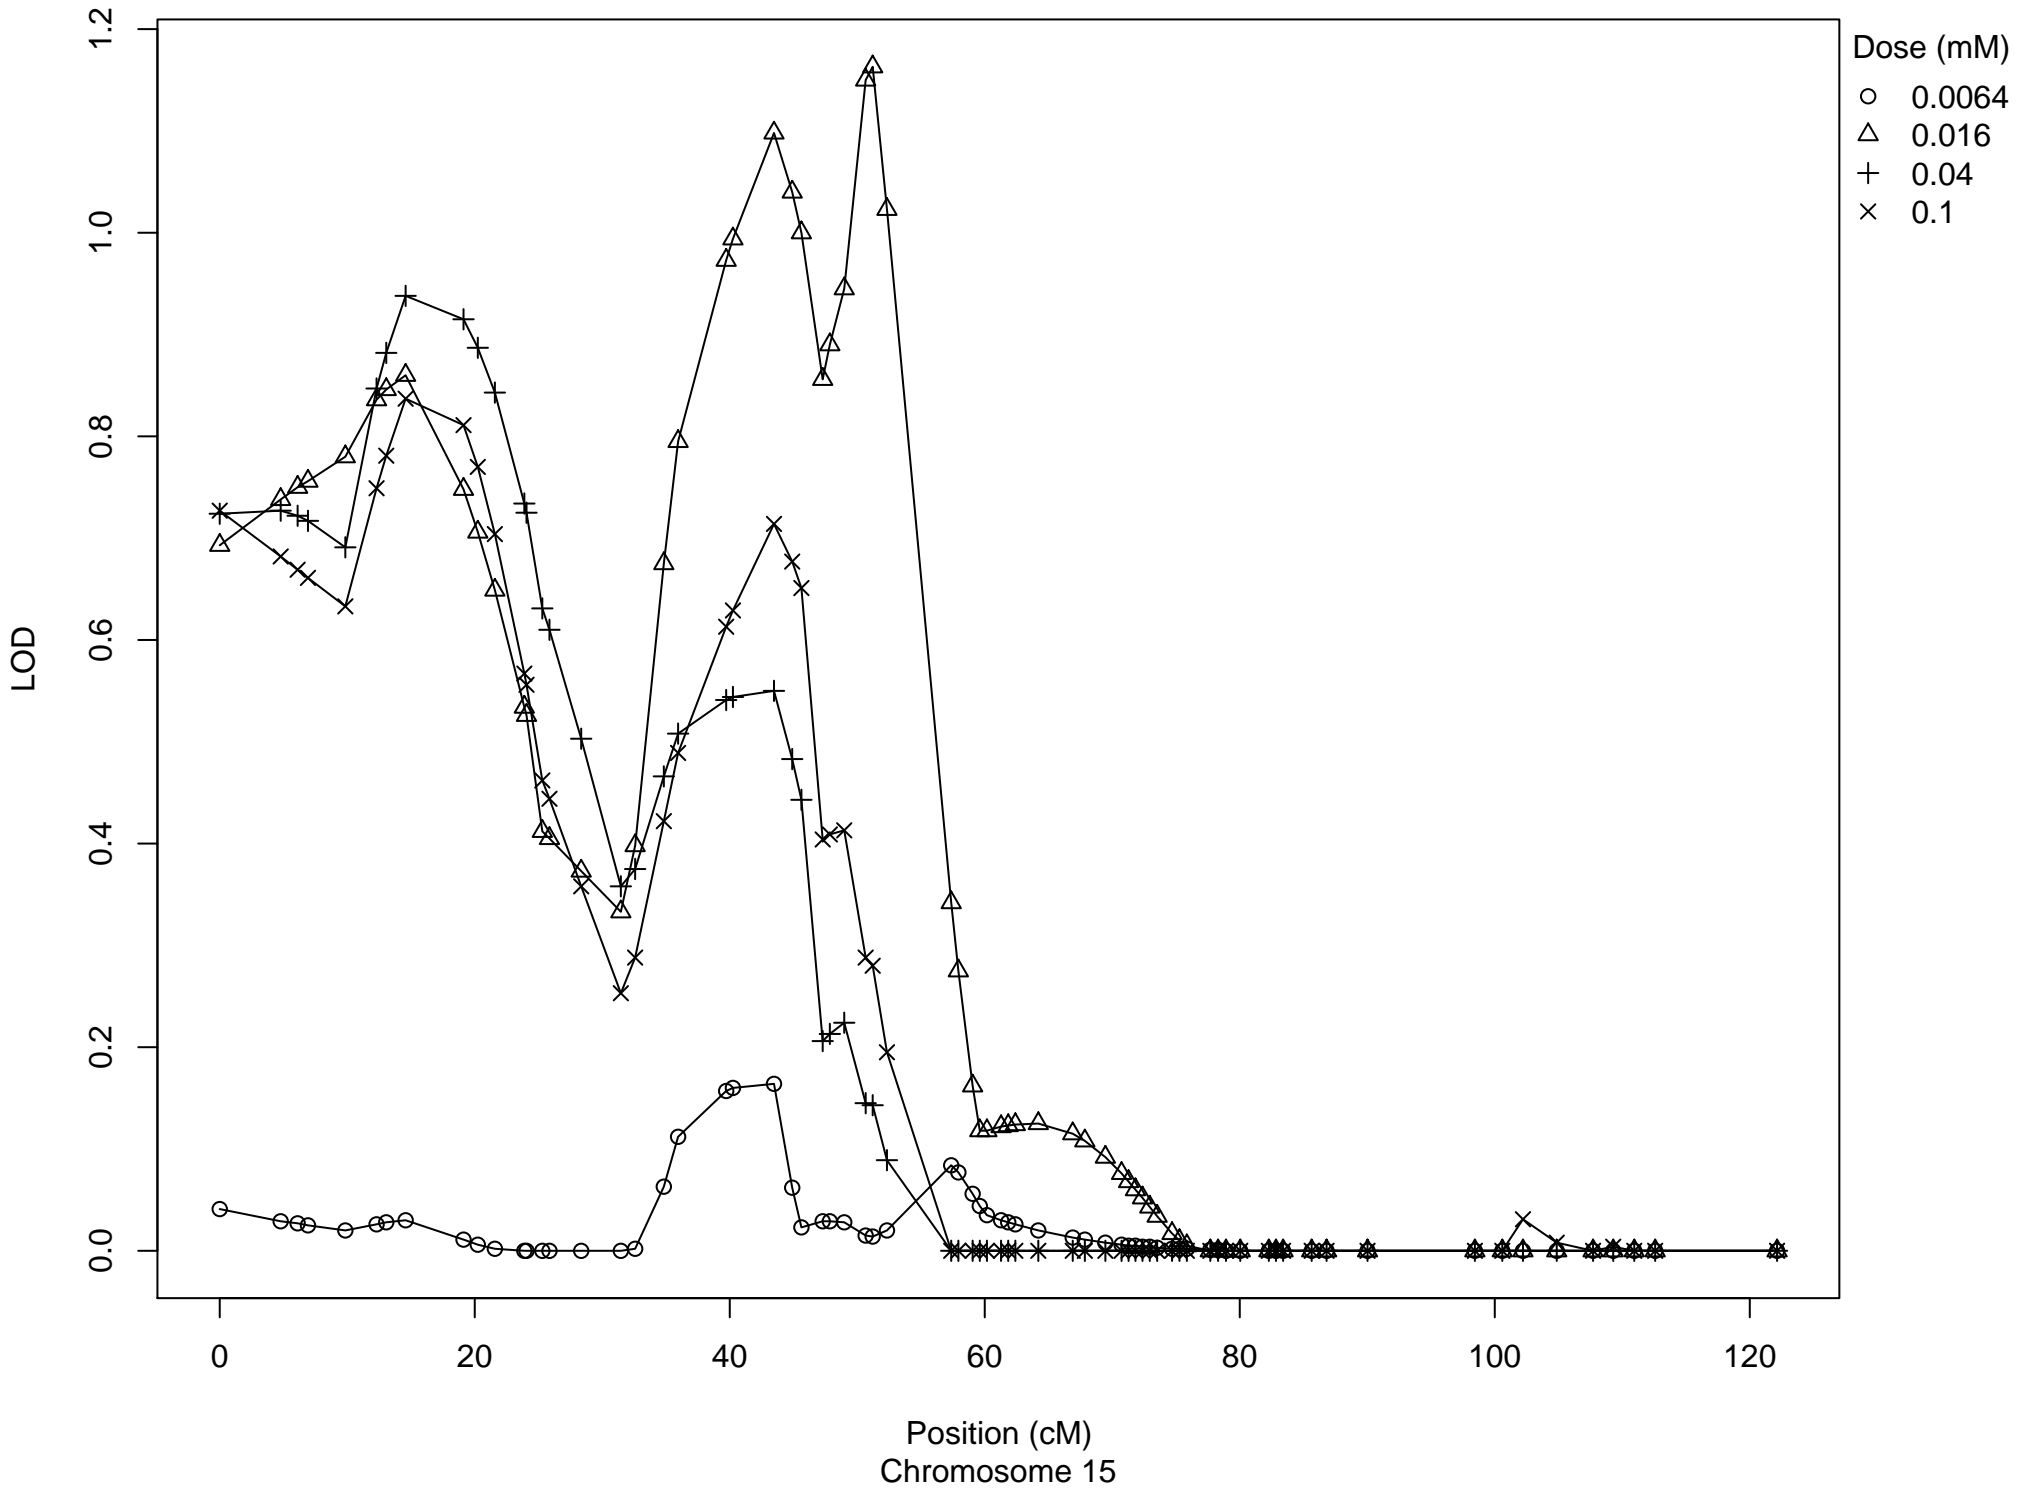

# 2-fluoroadenine-9-beta-d-arabinofuranoside (Flud)

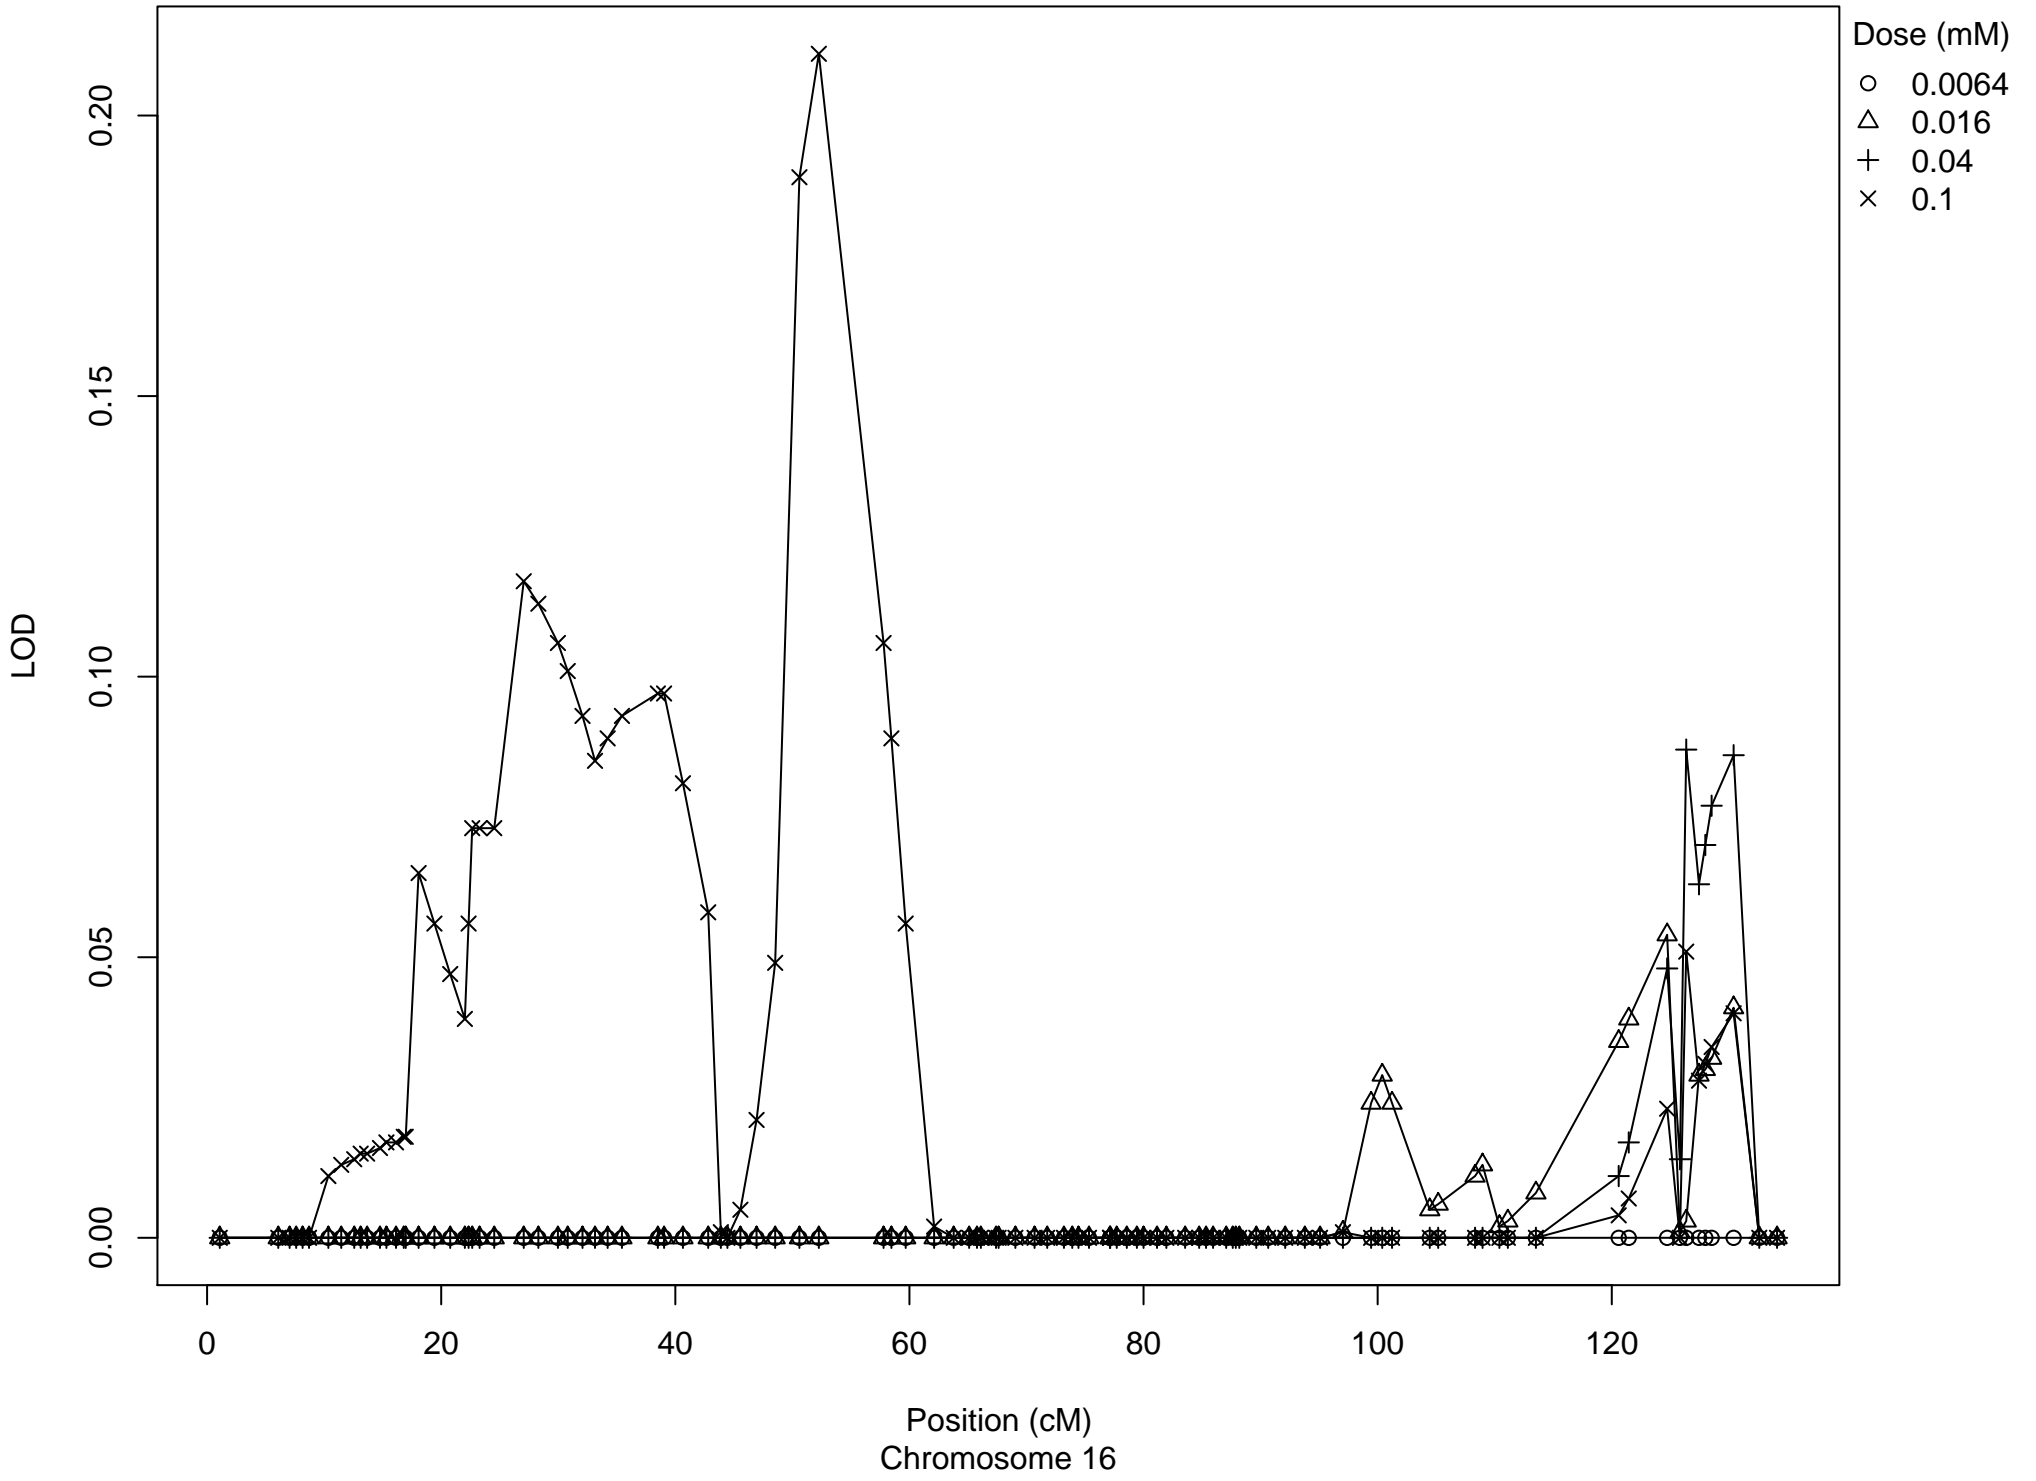

# 2-fluoroadenine-9-beta-d-arabinofuranoside (Flud)

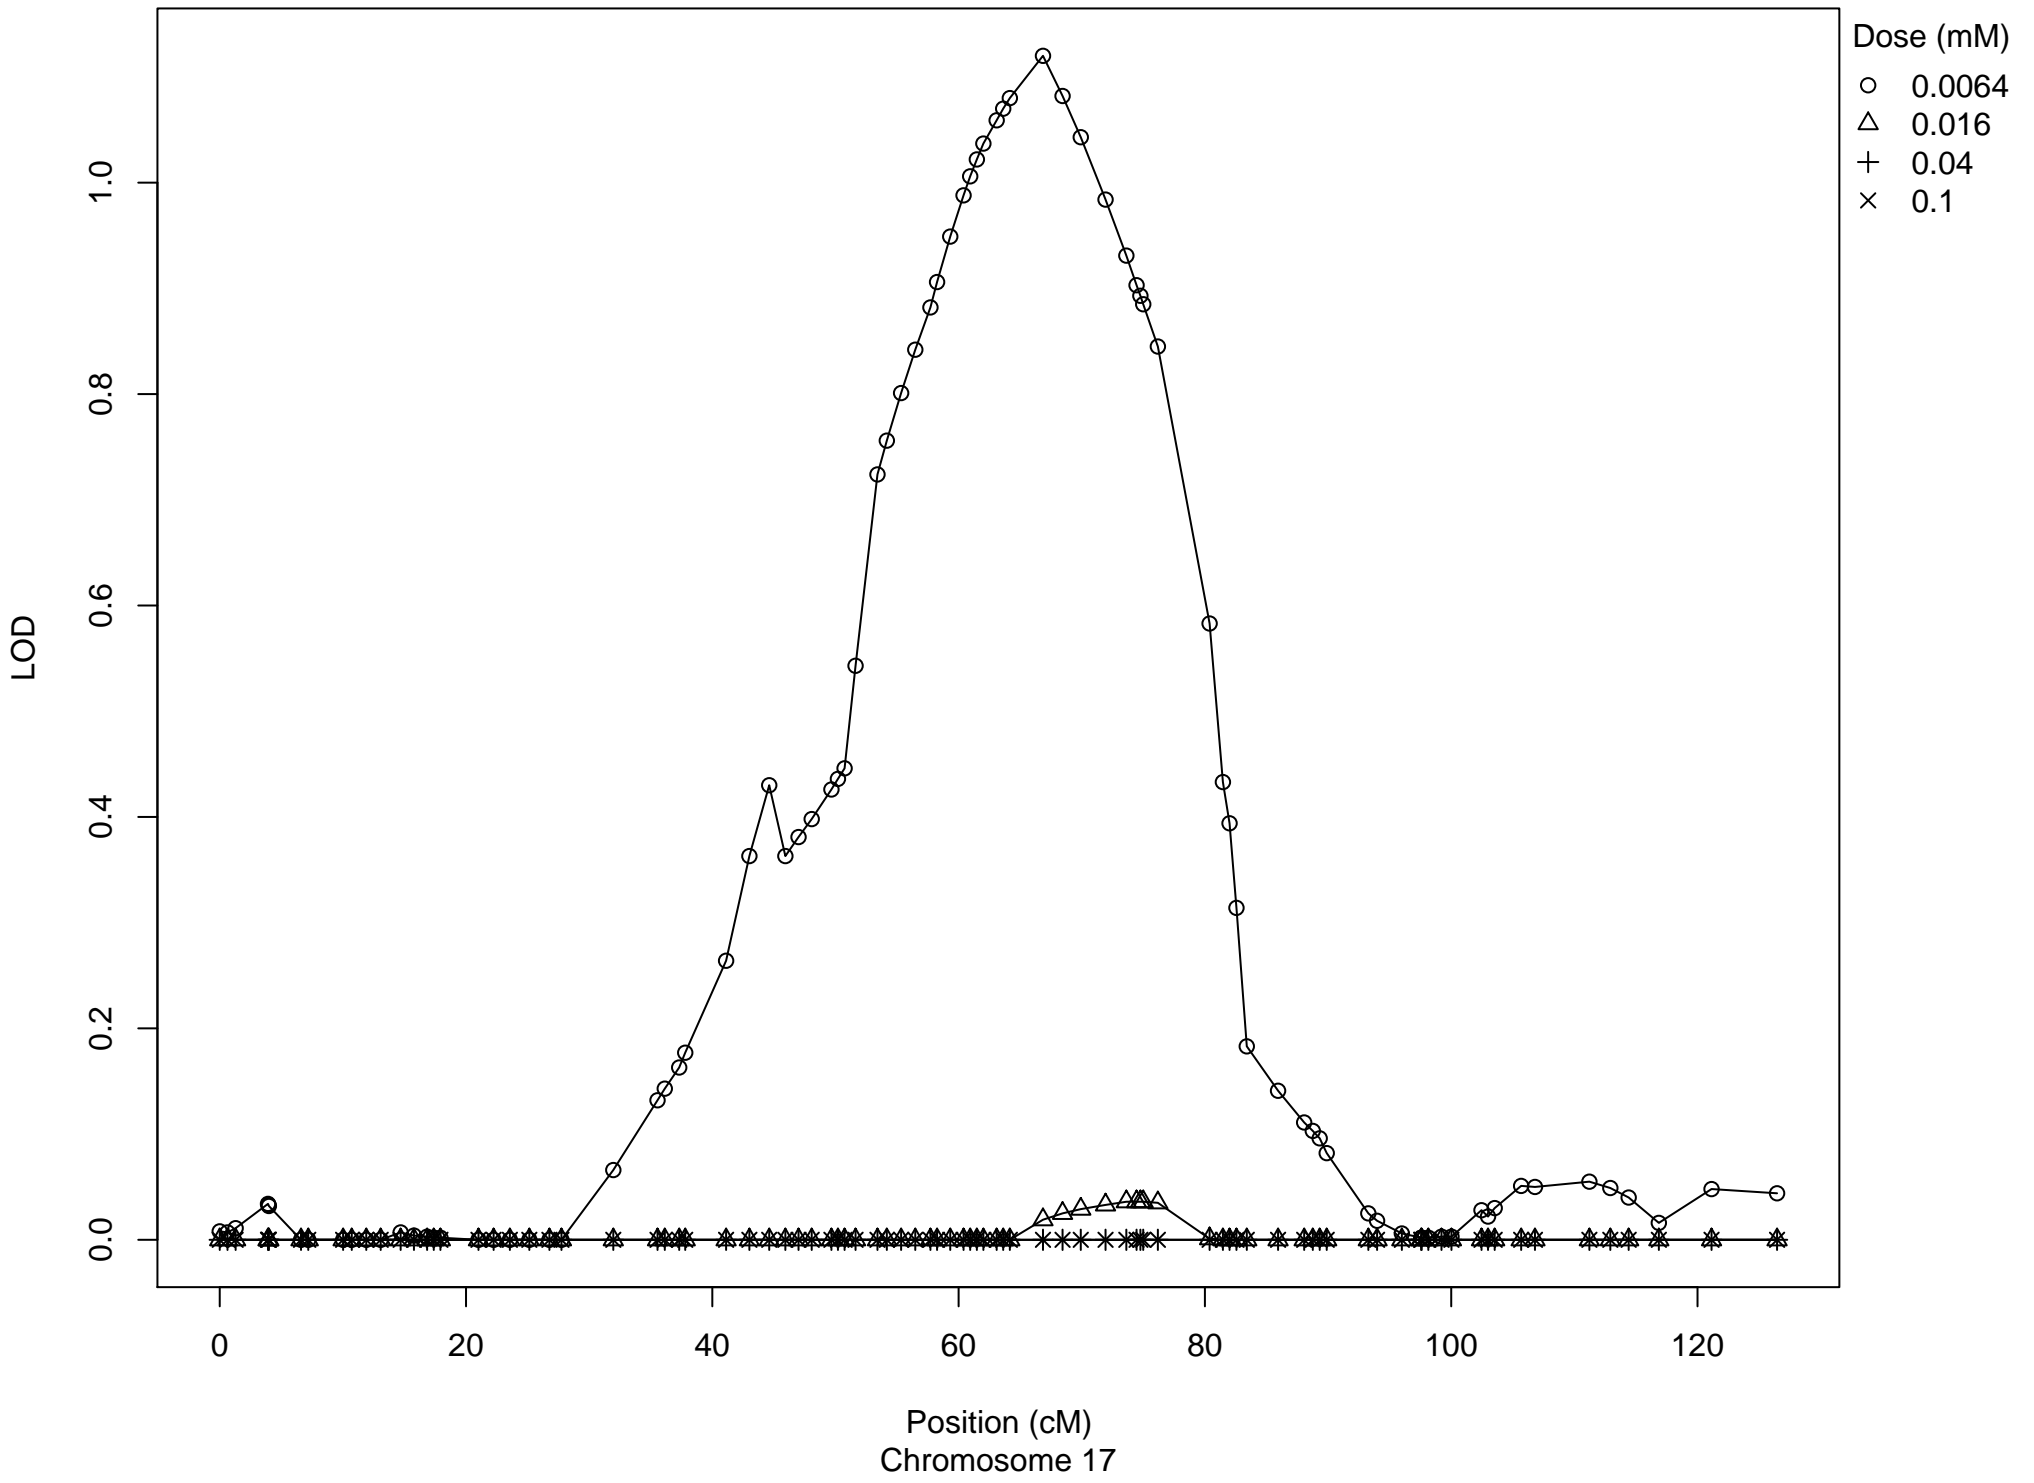

# 2-fluoroadenine-9-beta-d-arabinofuranoside (Flud)

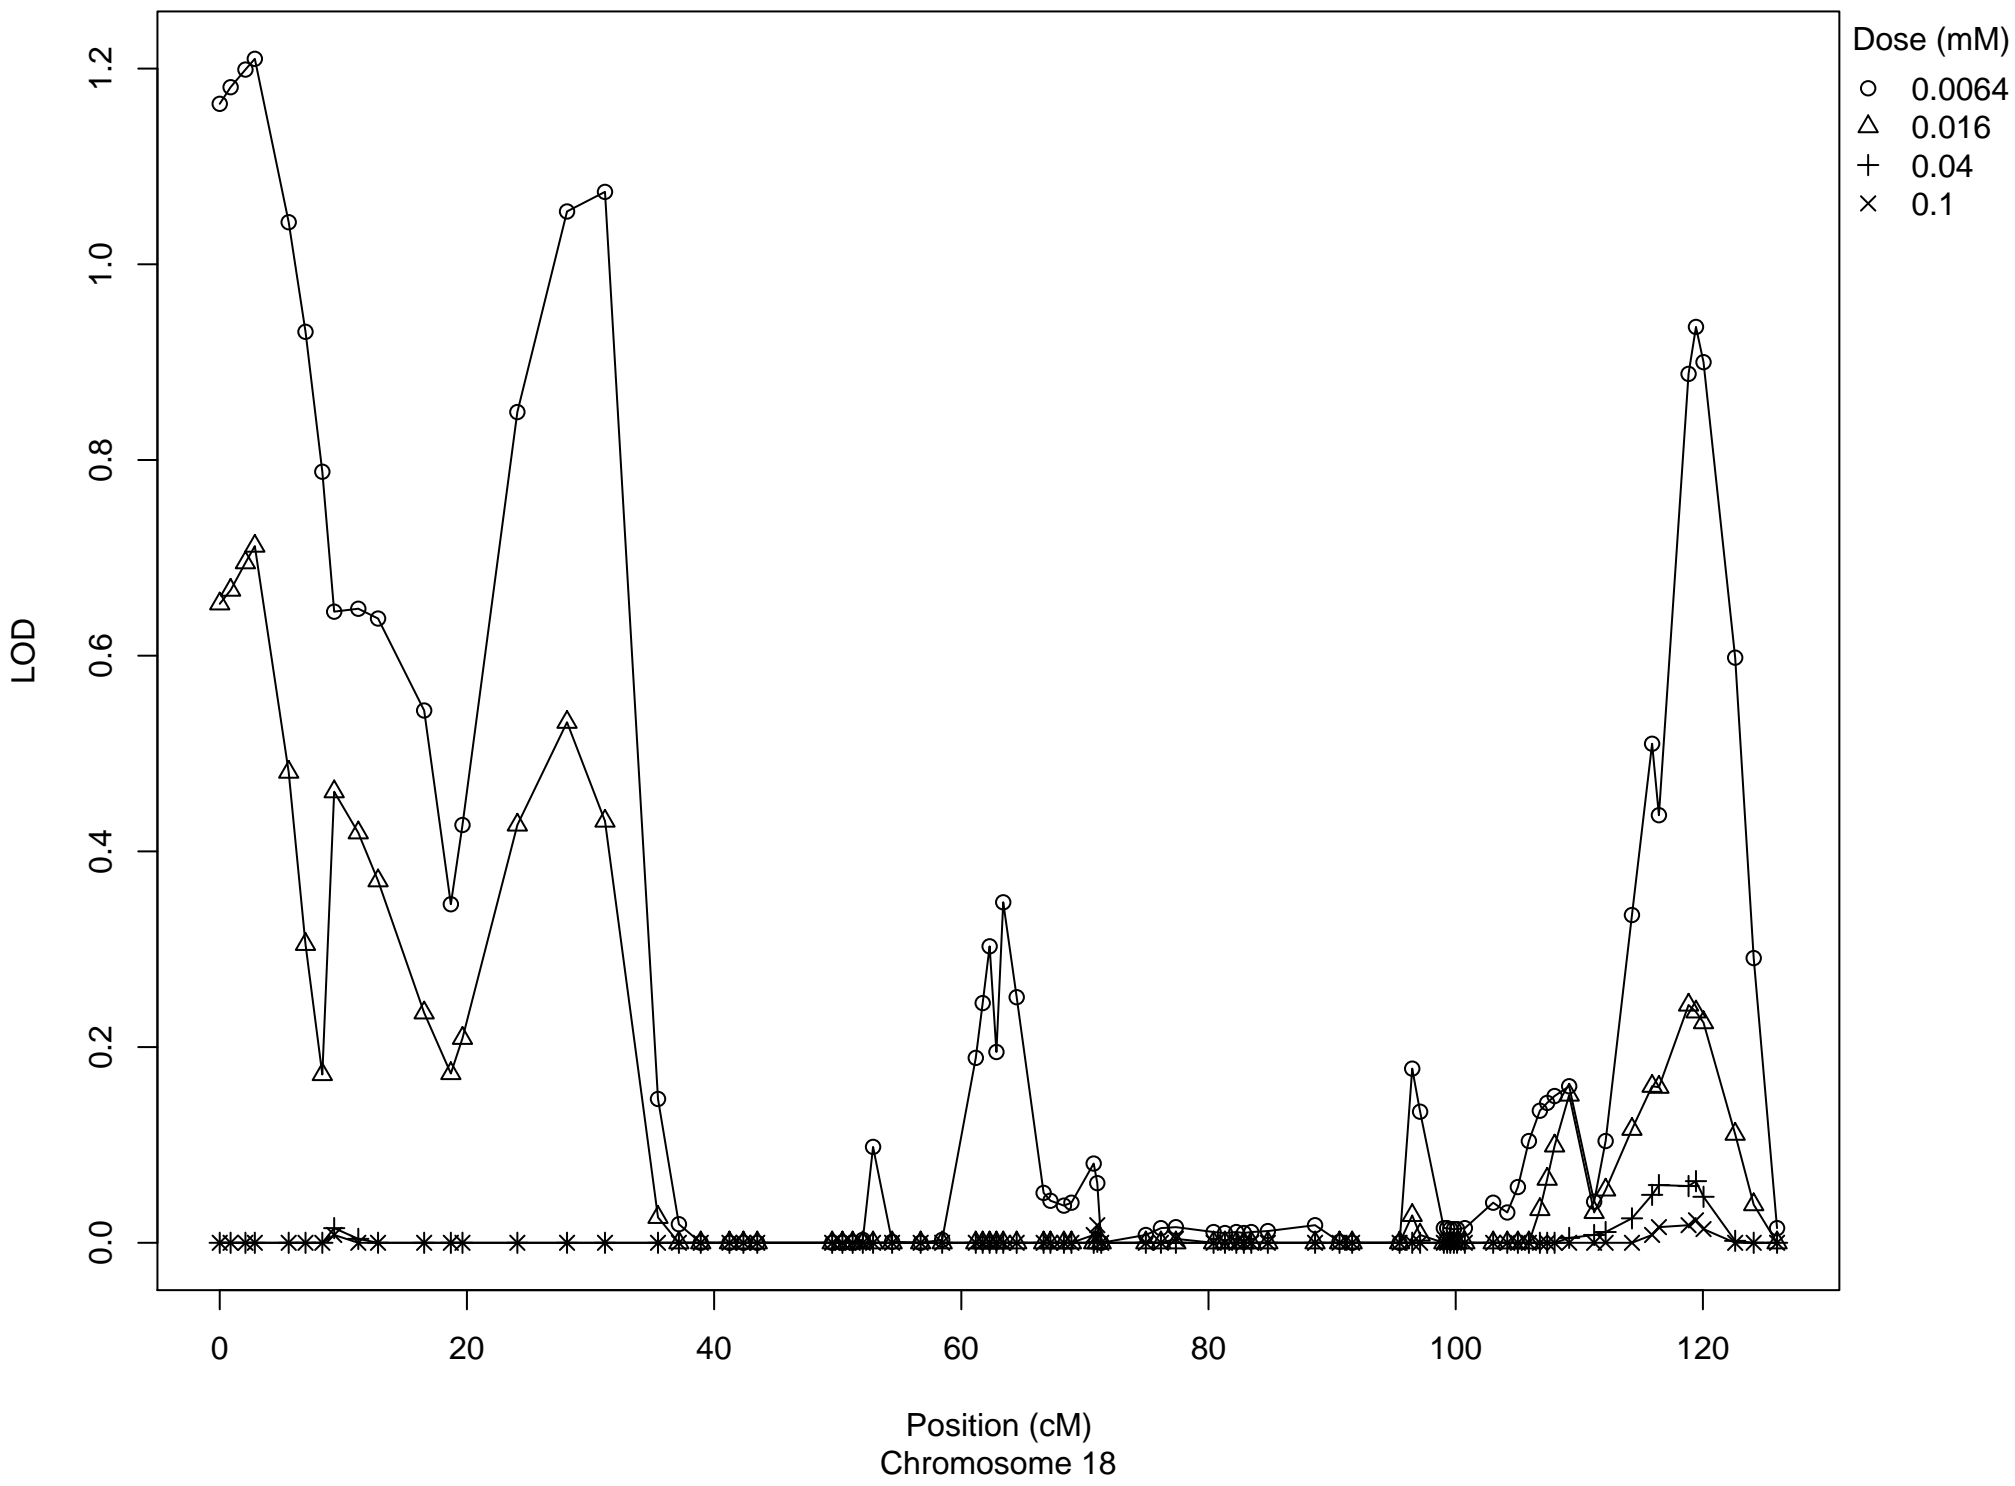



# 2-fluoroadenine-9-beta-d-arabinofuranoside (Flud)

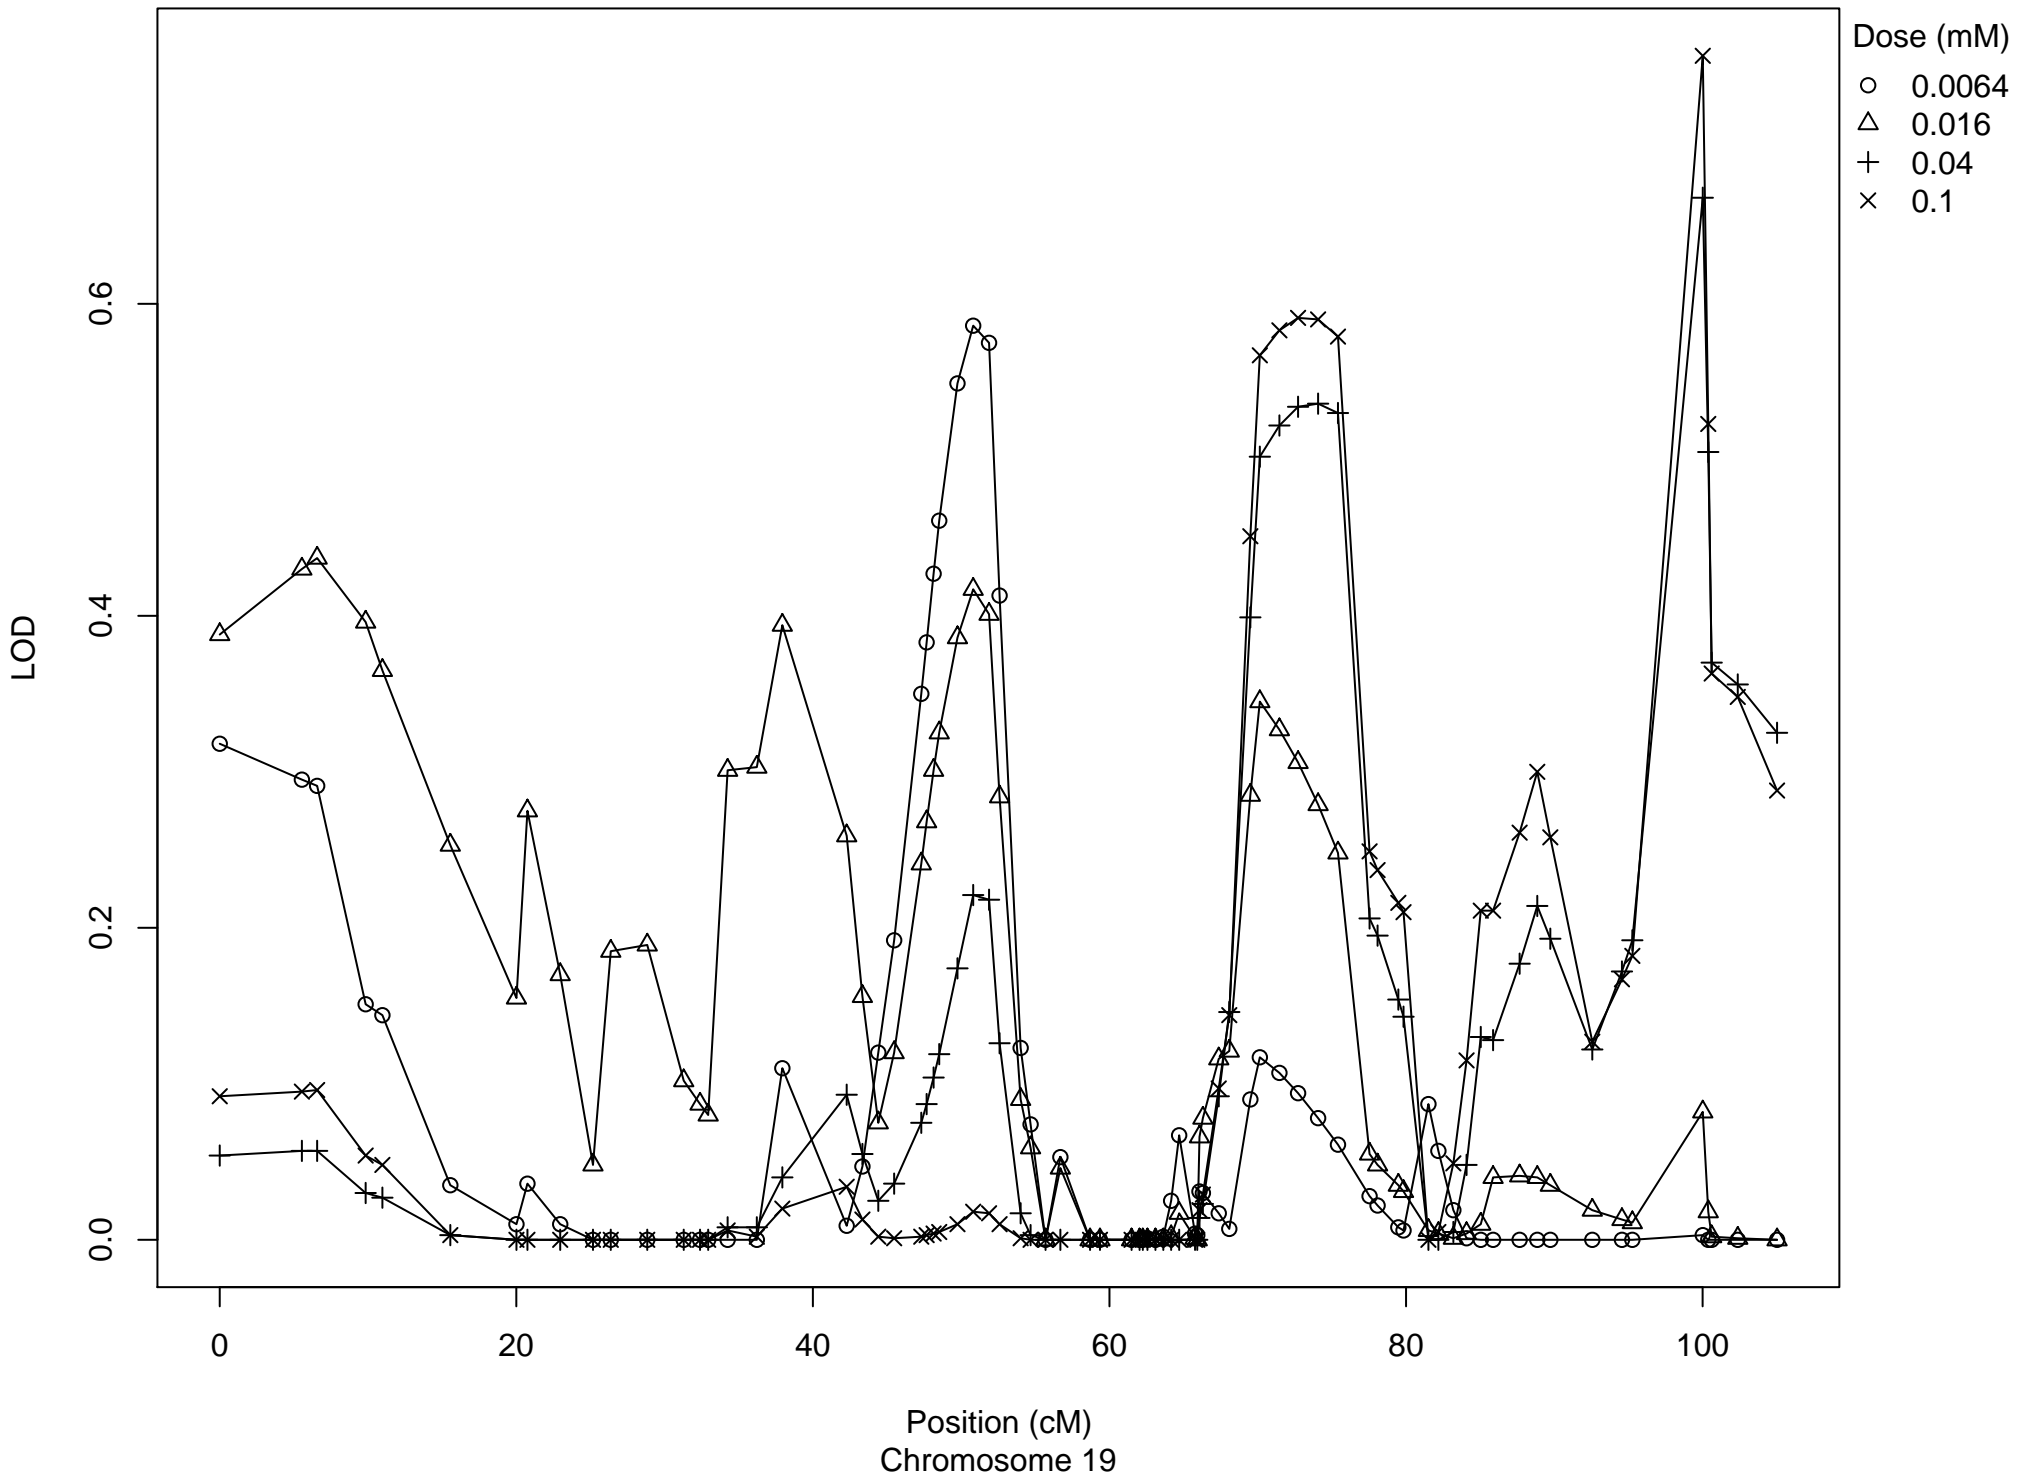

# 2-fluoroadenine-9-beta-d-arabinofuranoside (Flud)

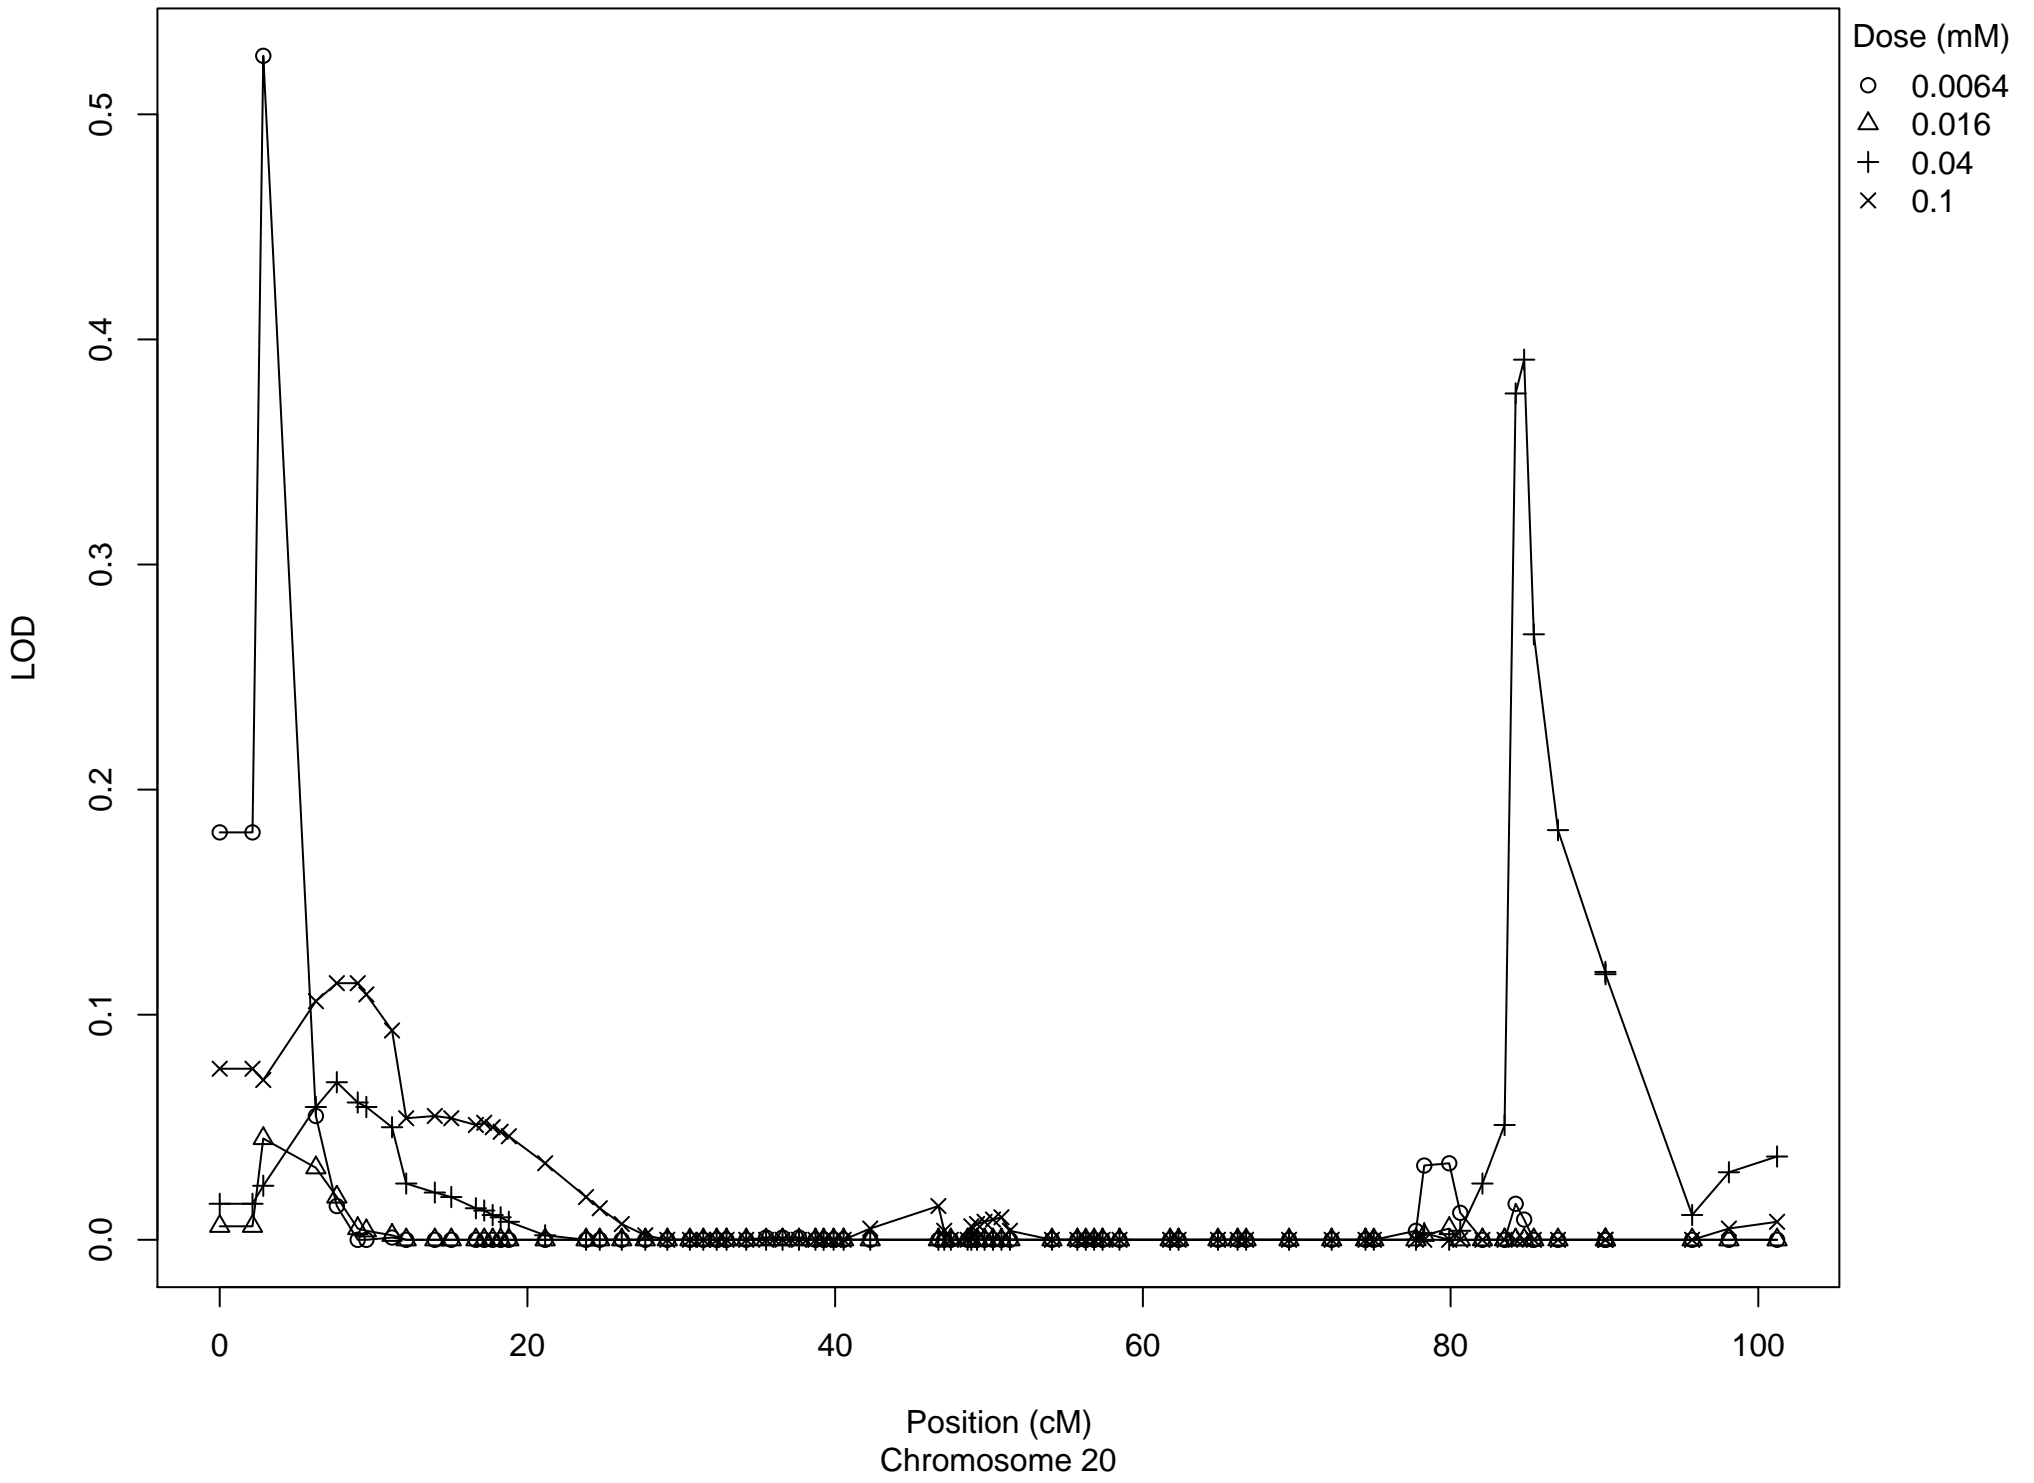

# 2-fluoroadenine-9-beta-d-arabinofuranoside (Flud)

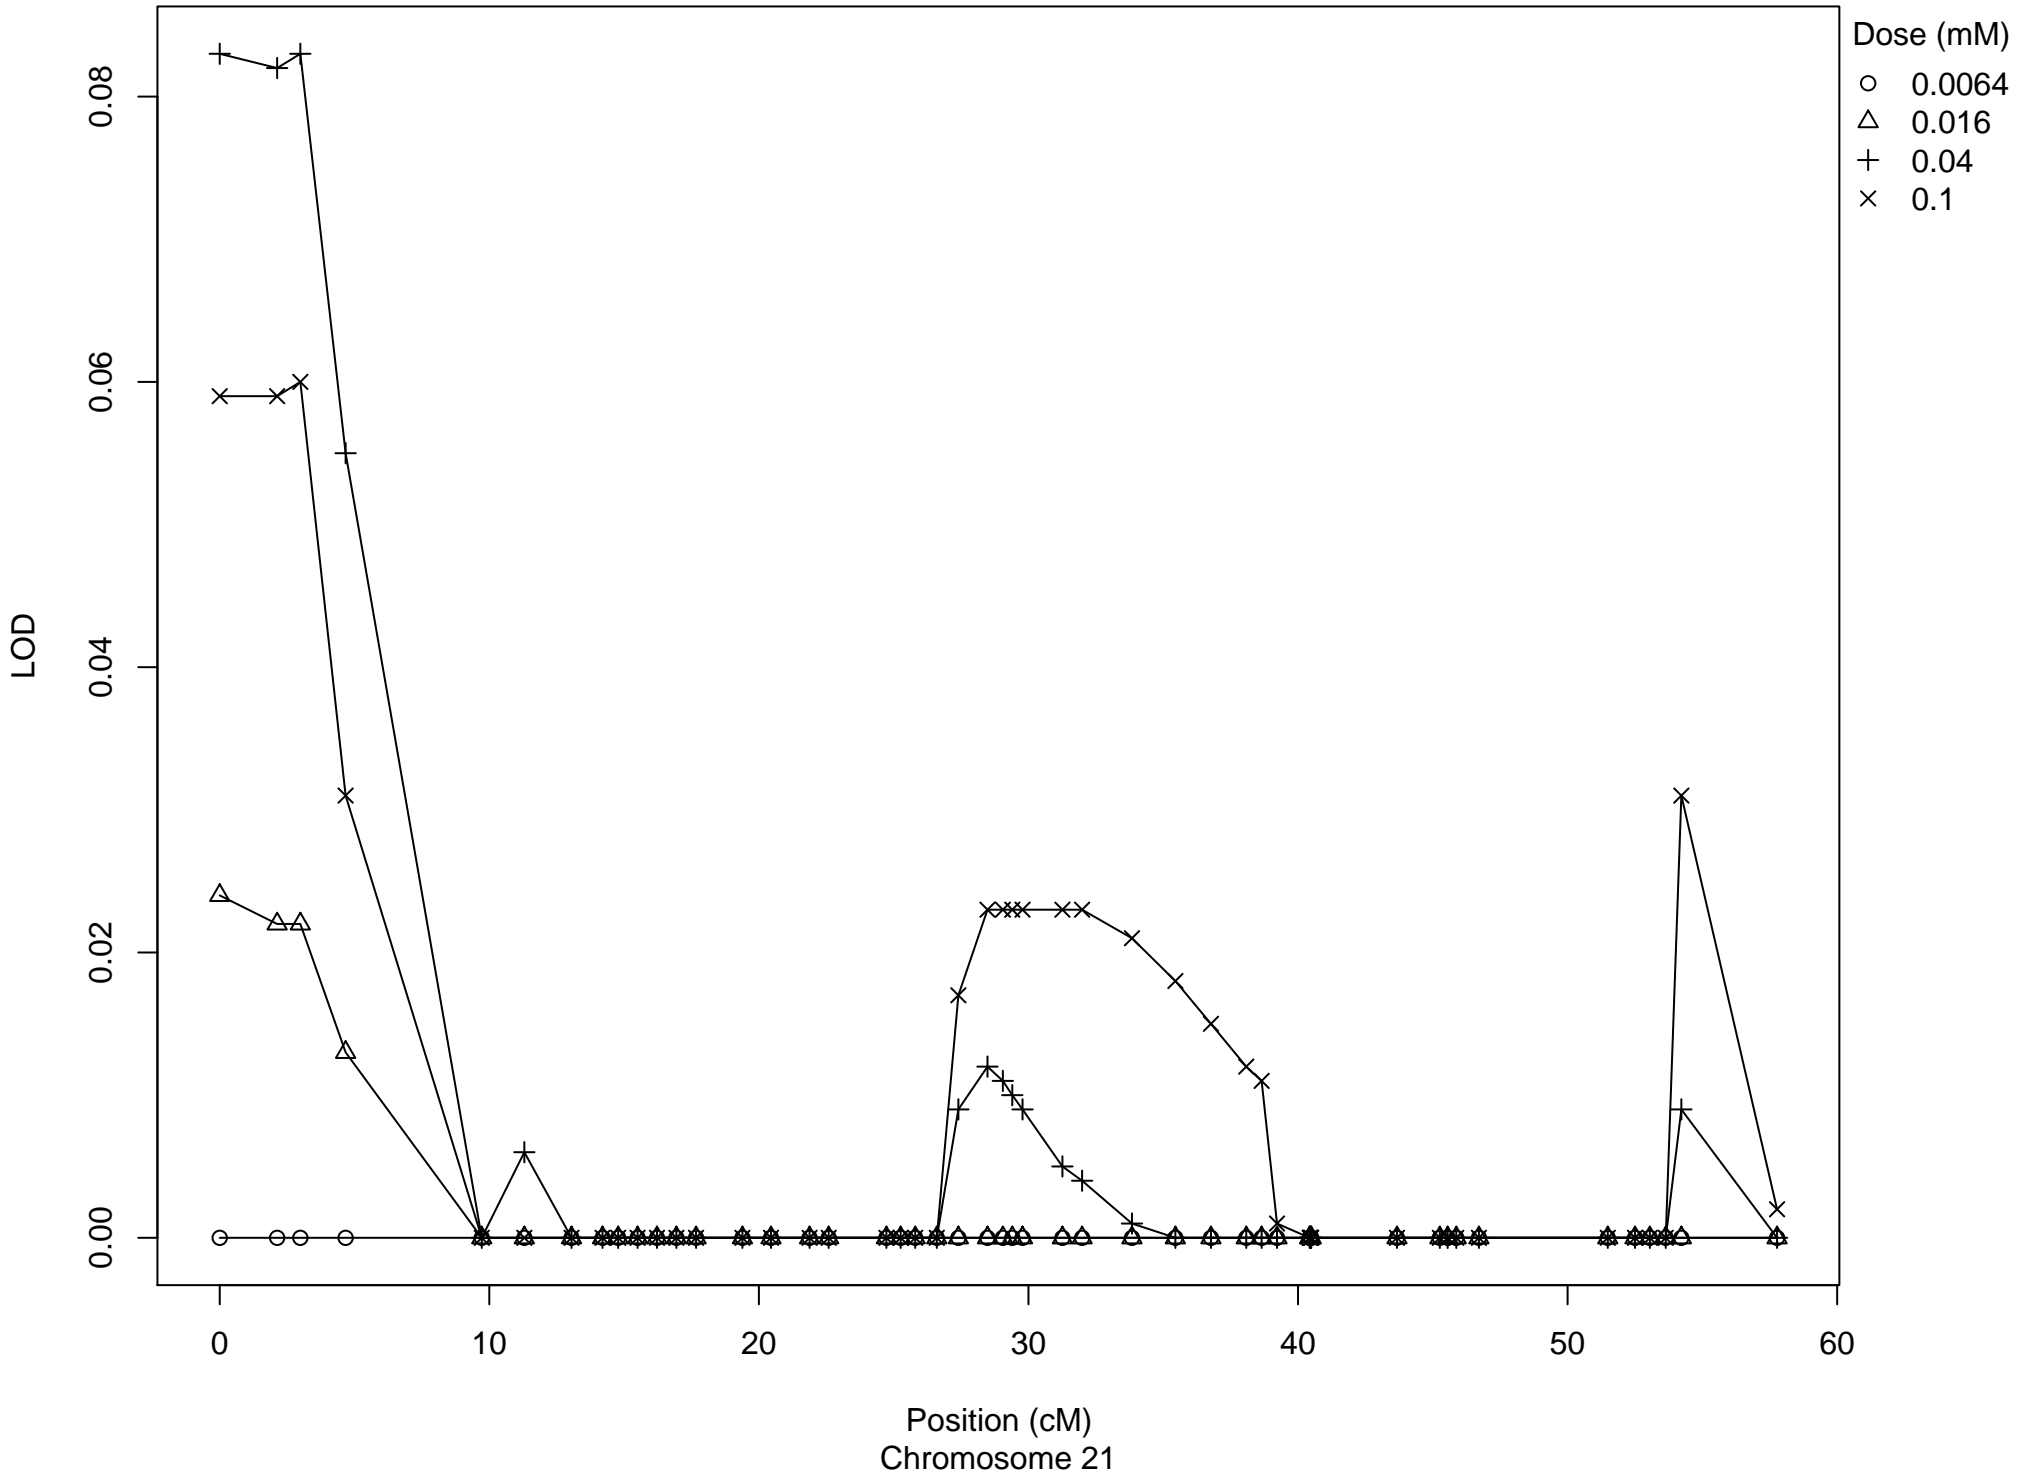

# 2-fluoroadenine-9-beta-d-arabinofuranoside (Flud)

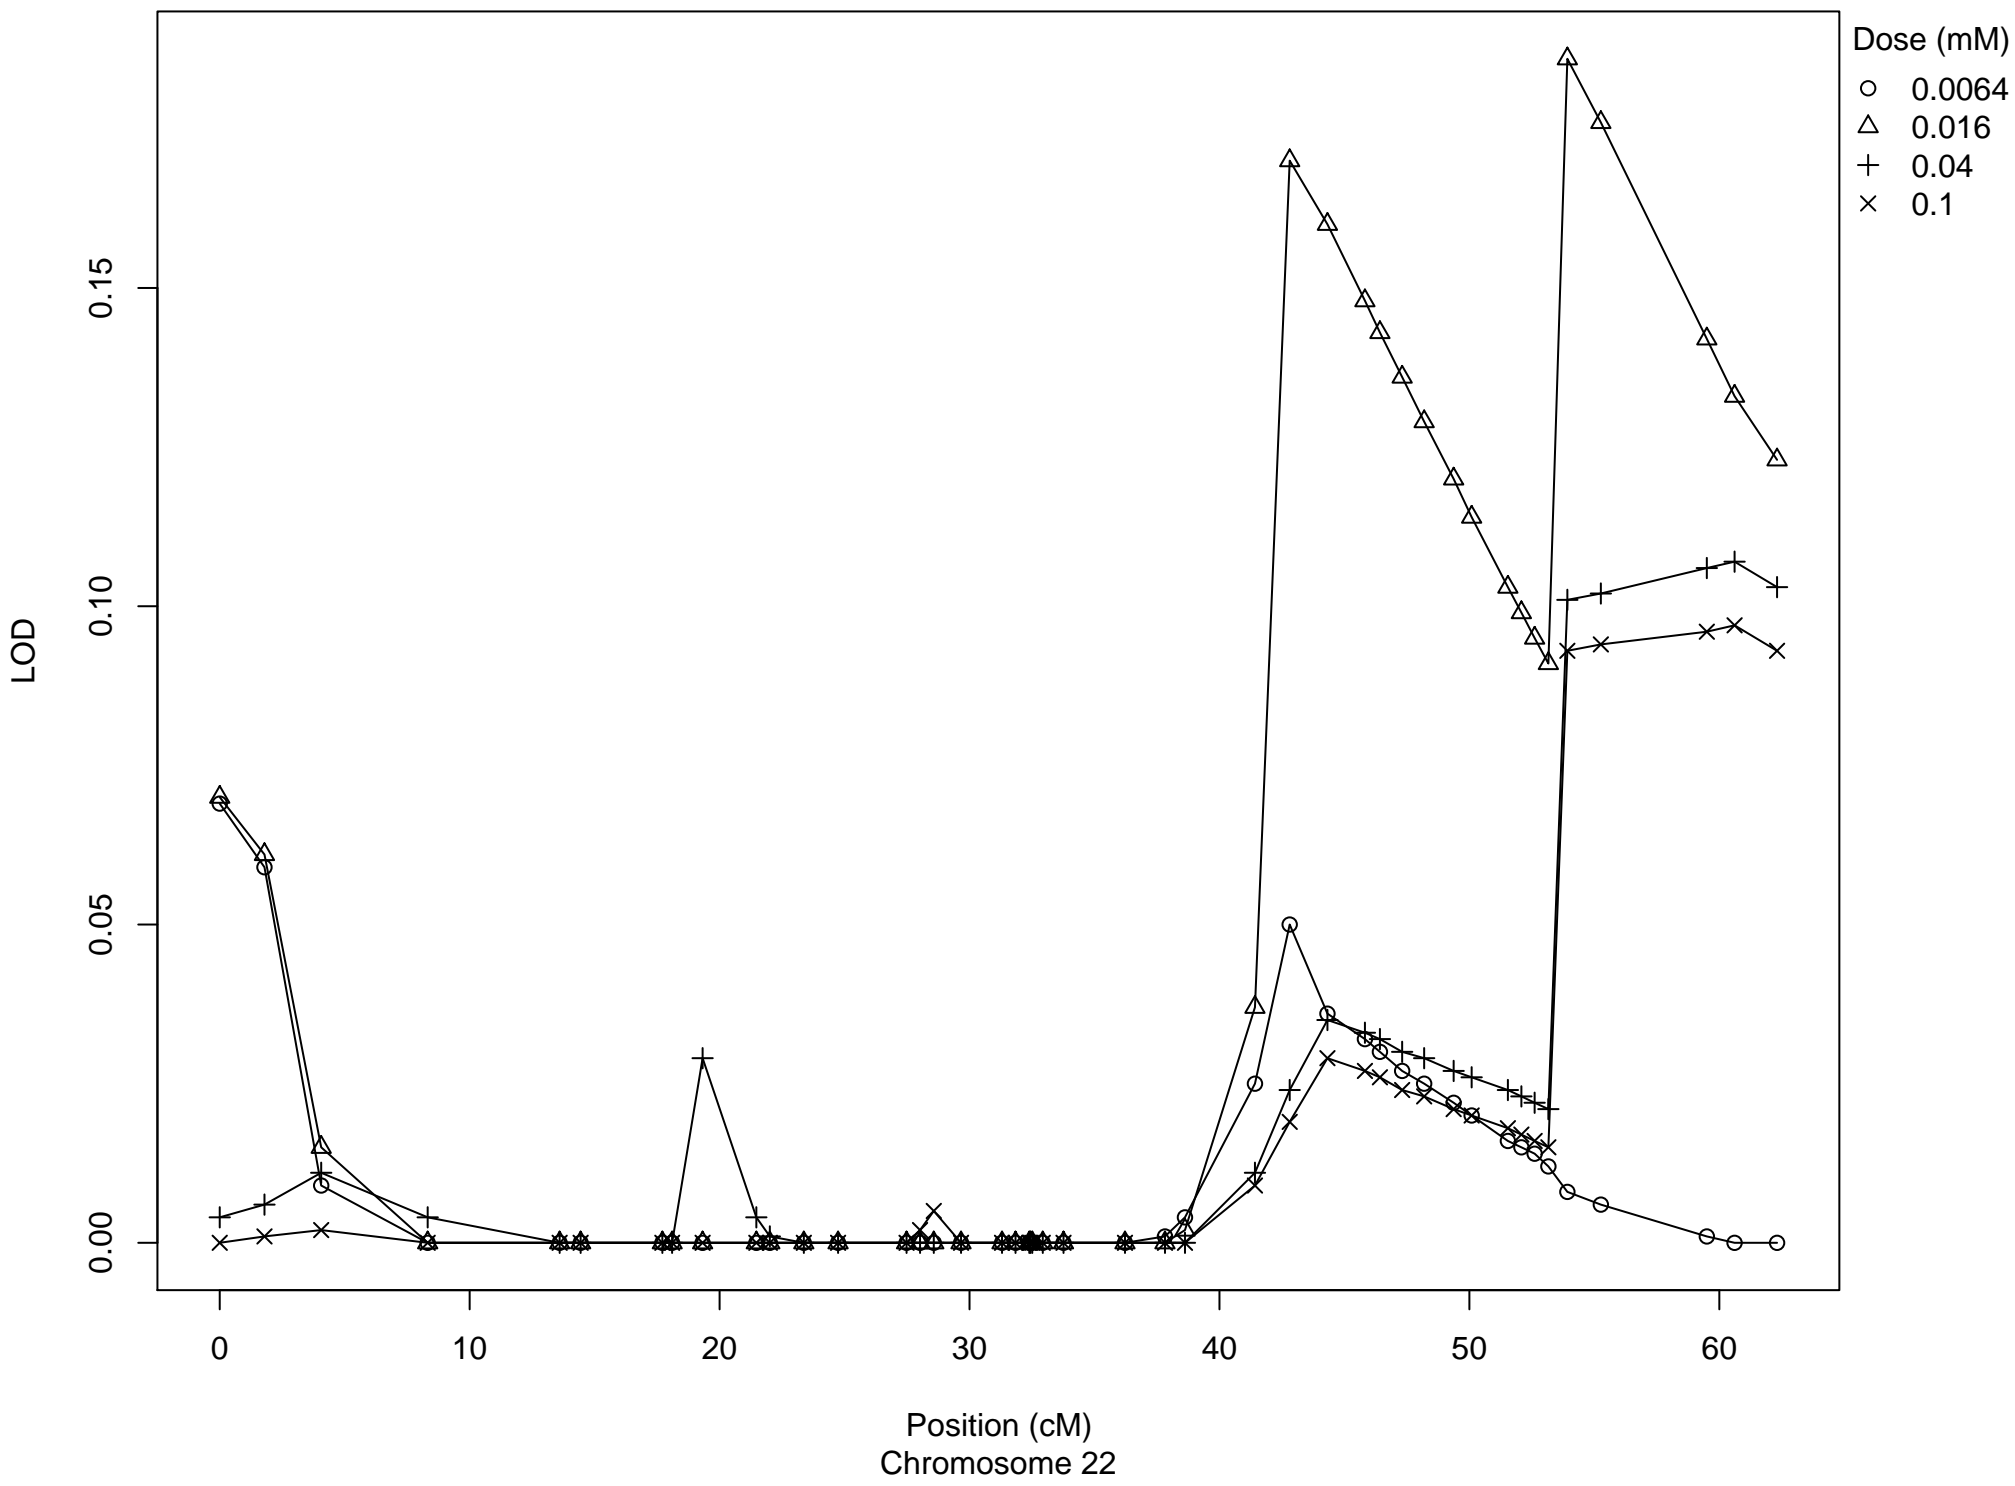

# 5-azacytidine (Aza)

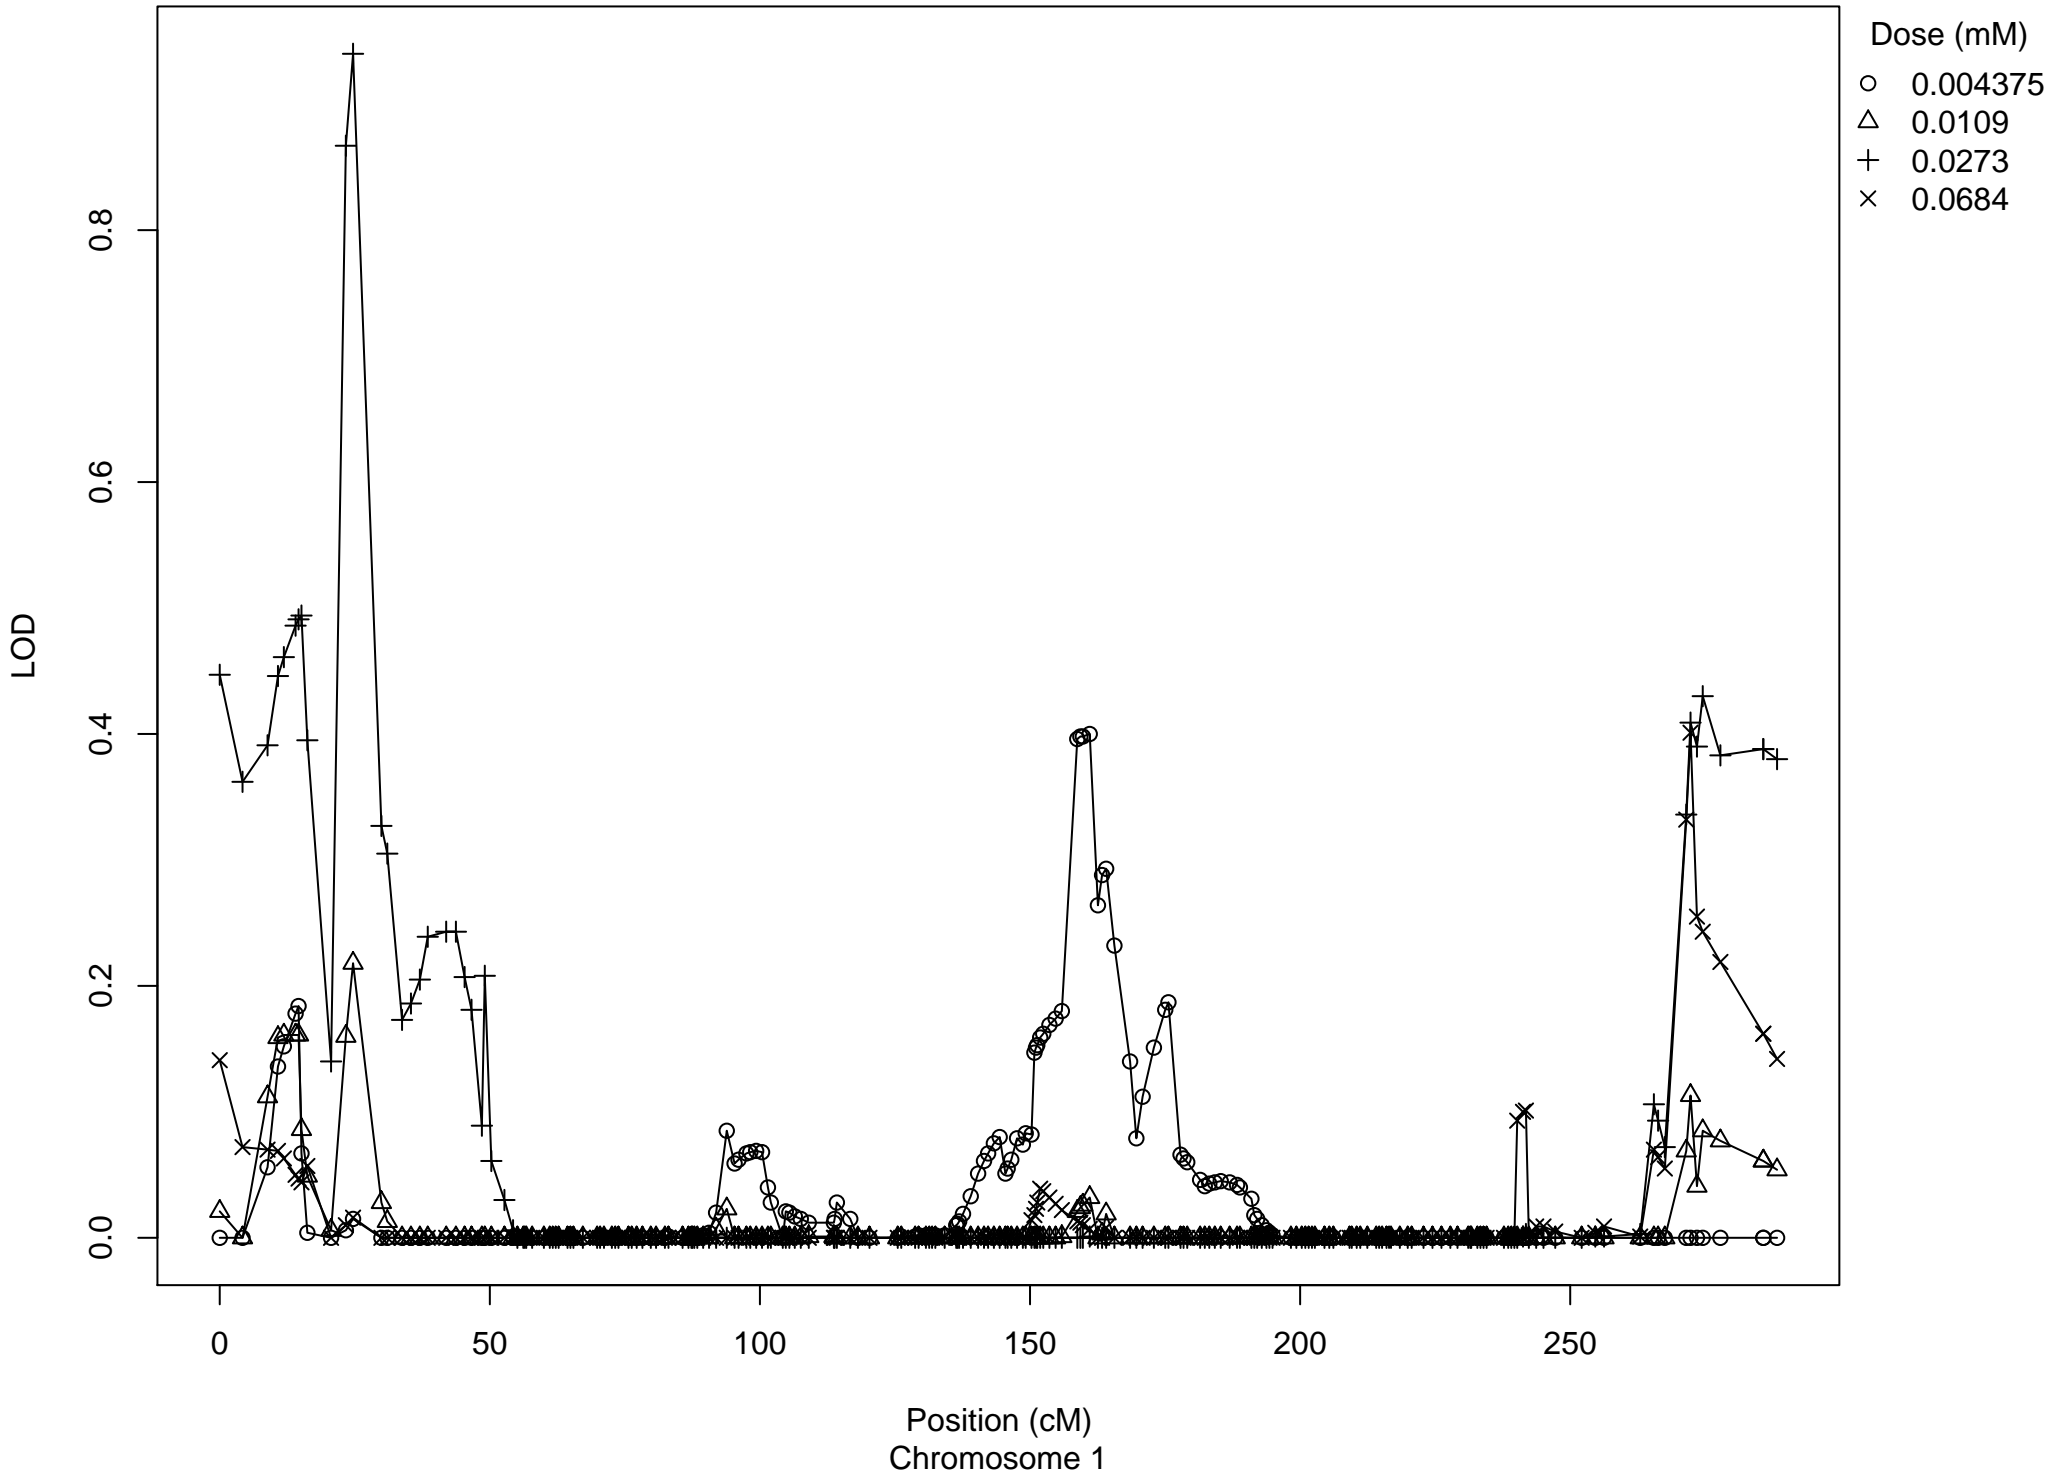

# 5-azacytidine (Aza)

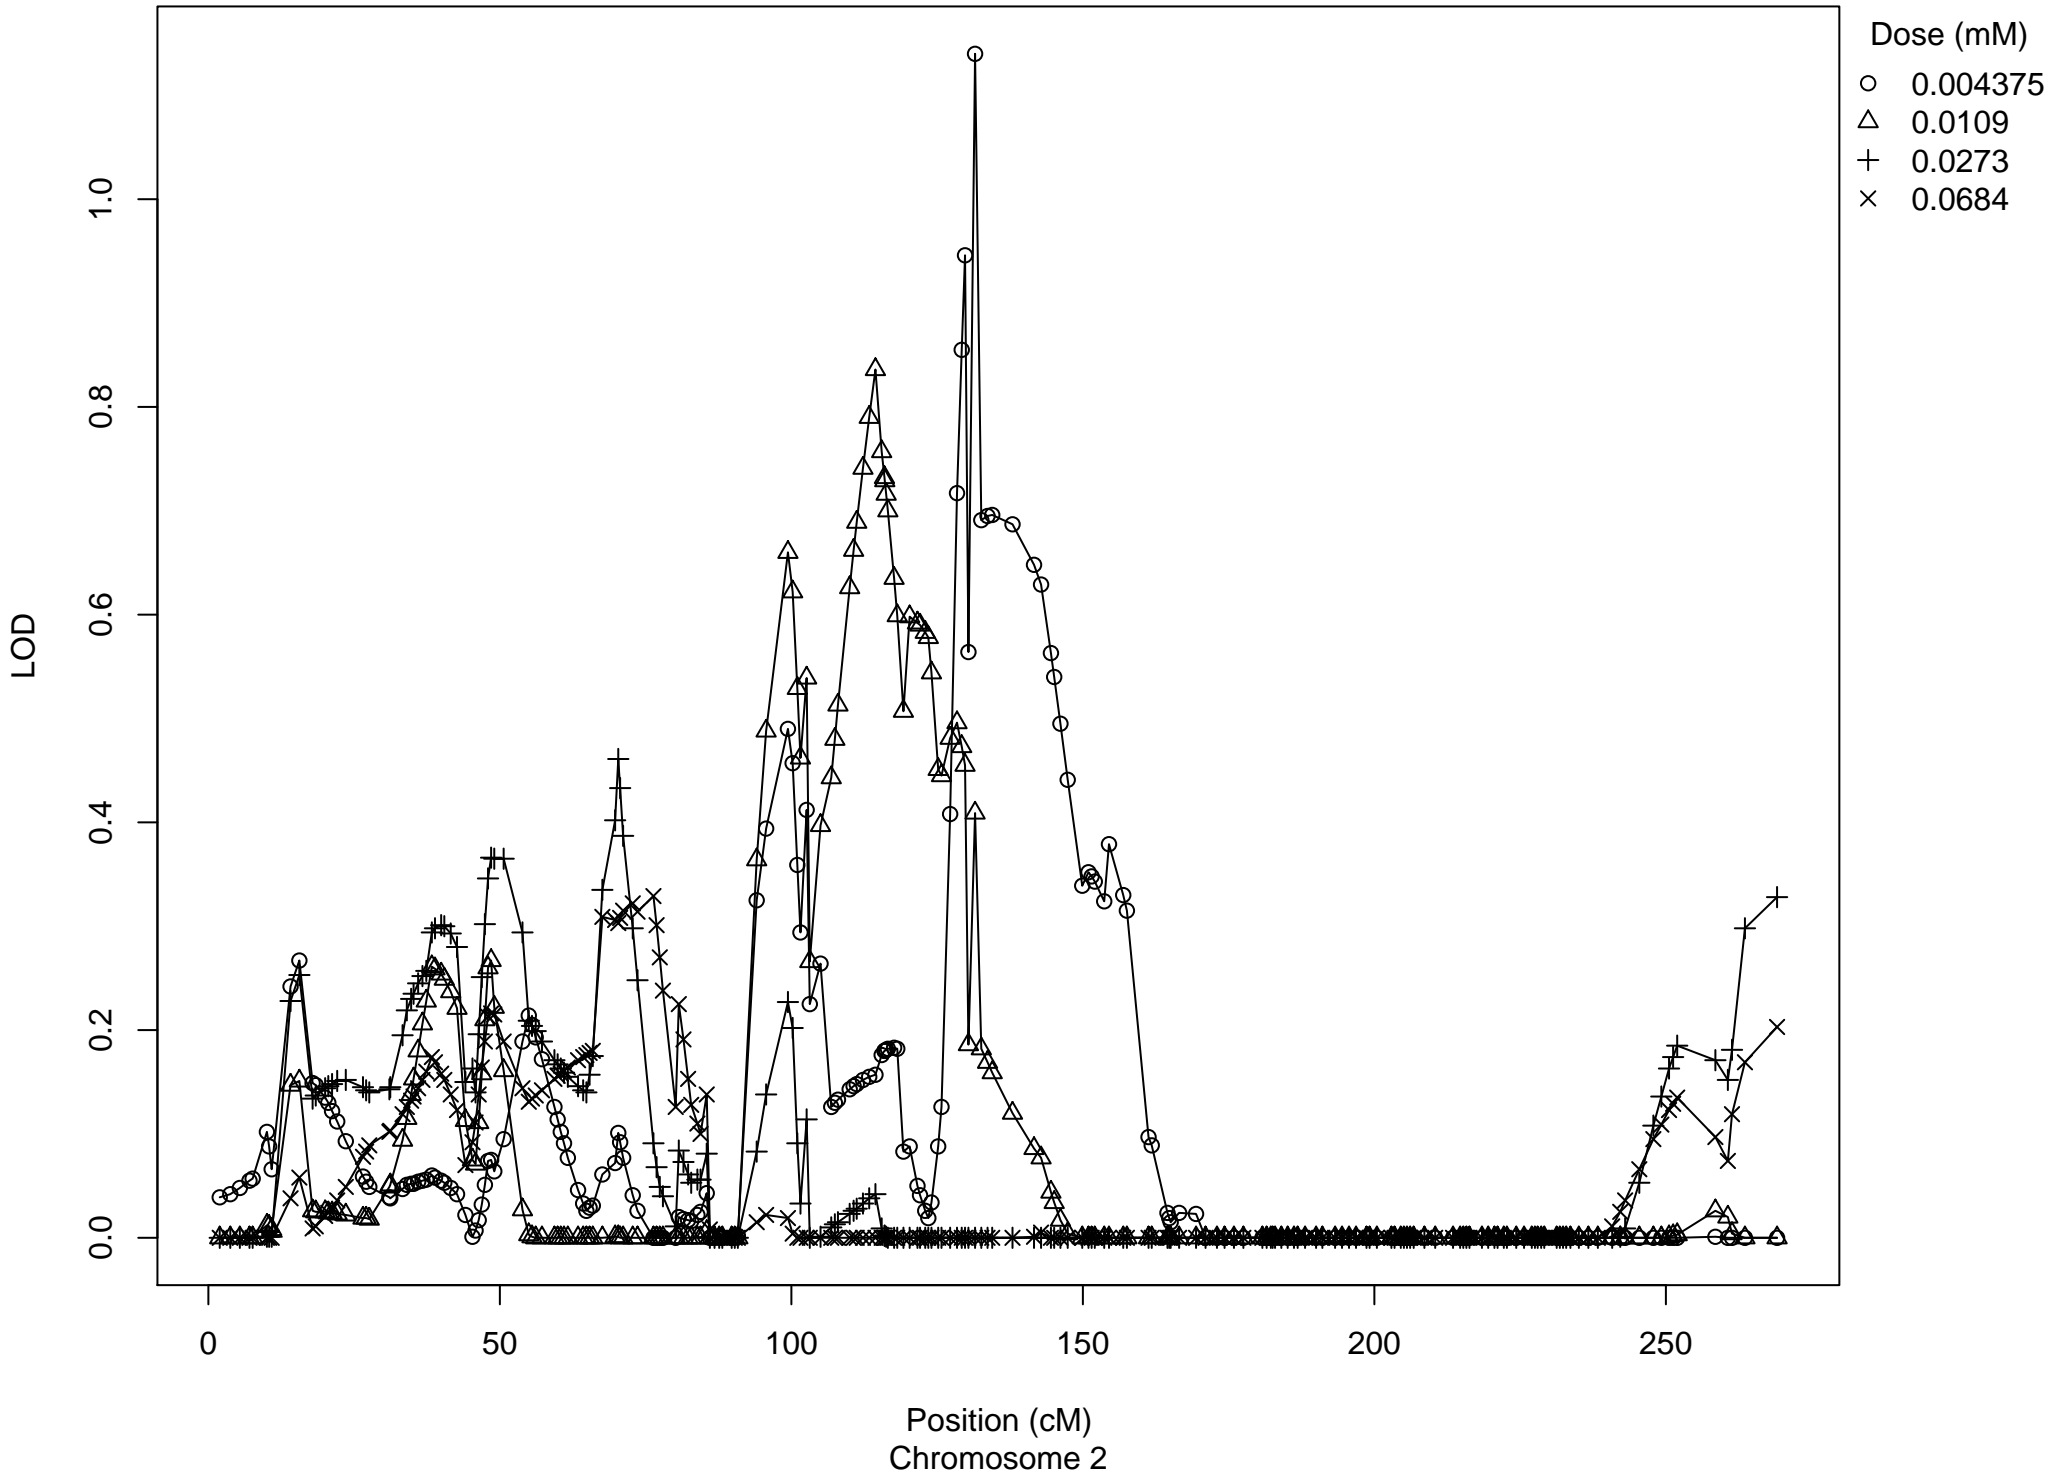

# 5-azacytidine (Aza)

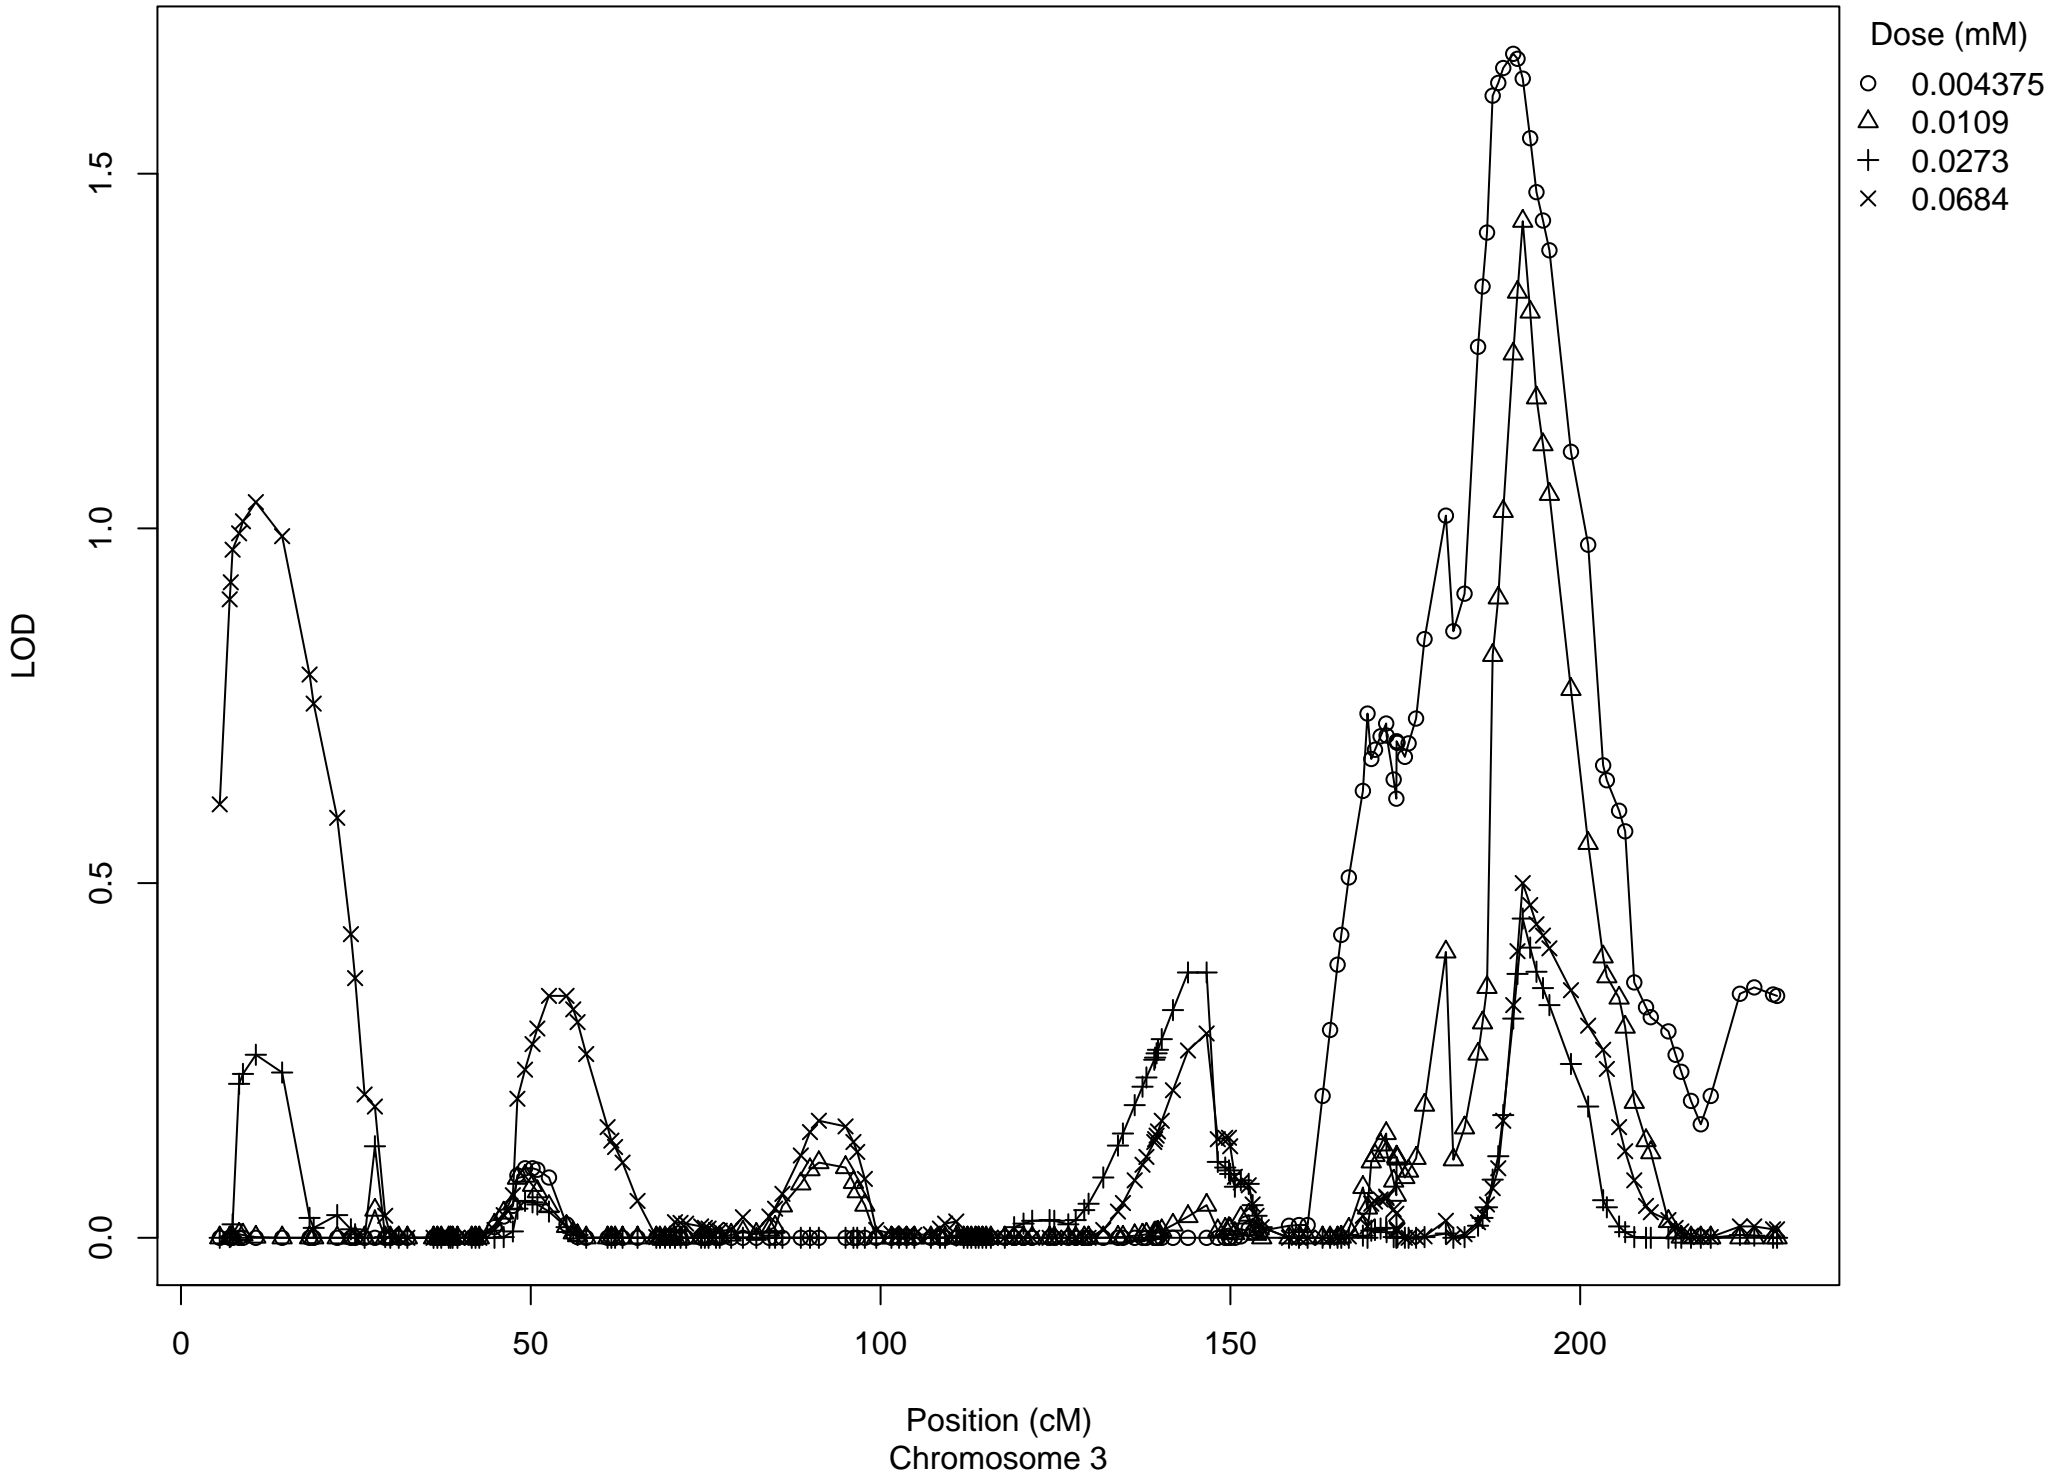

# 5-azacytidine (Aza)

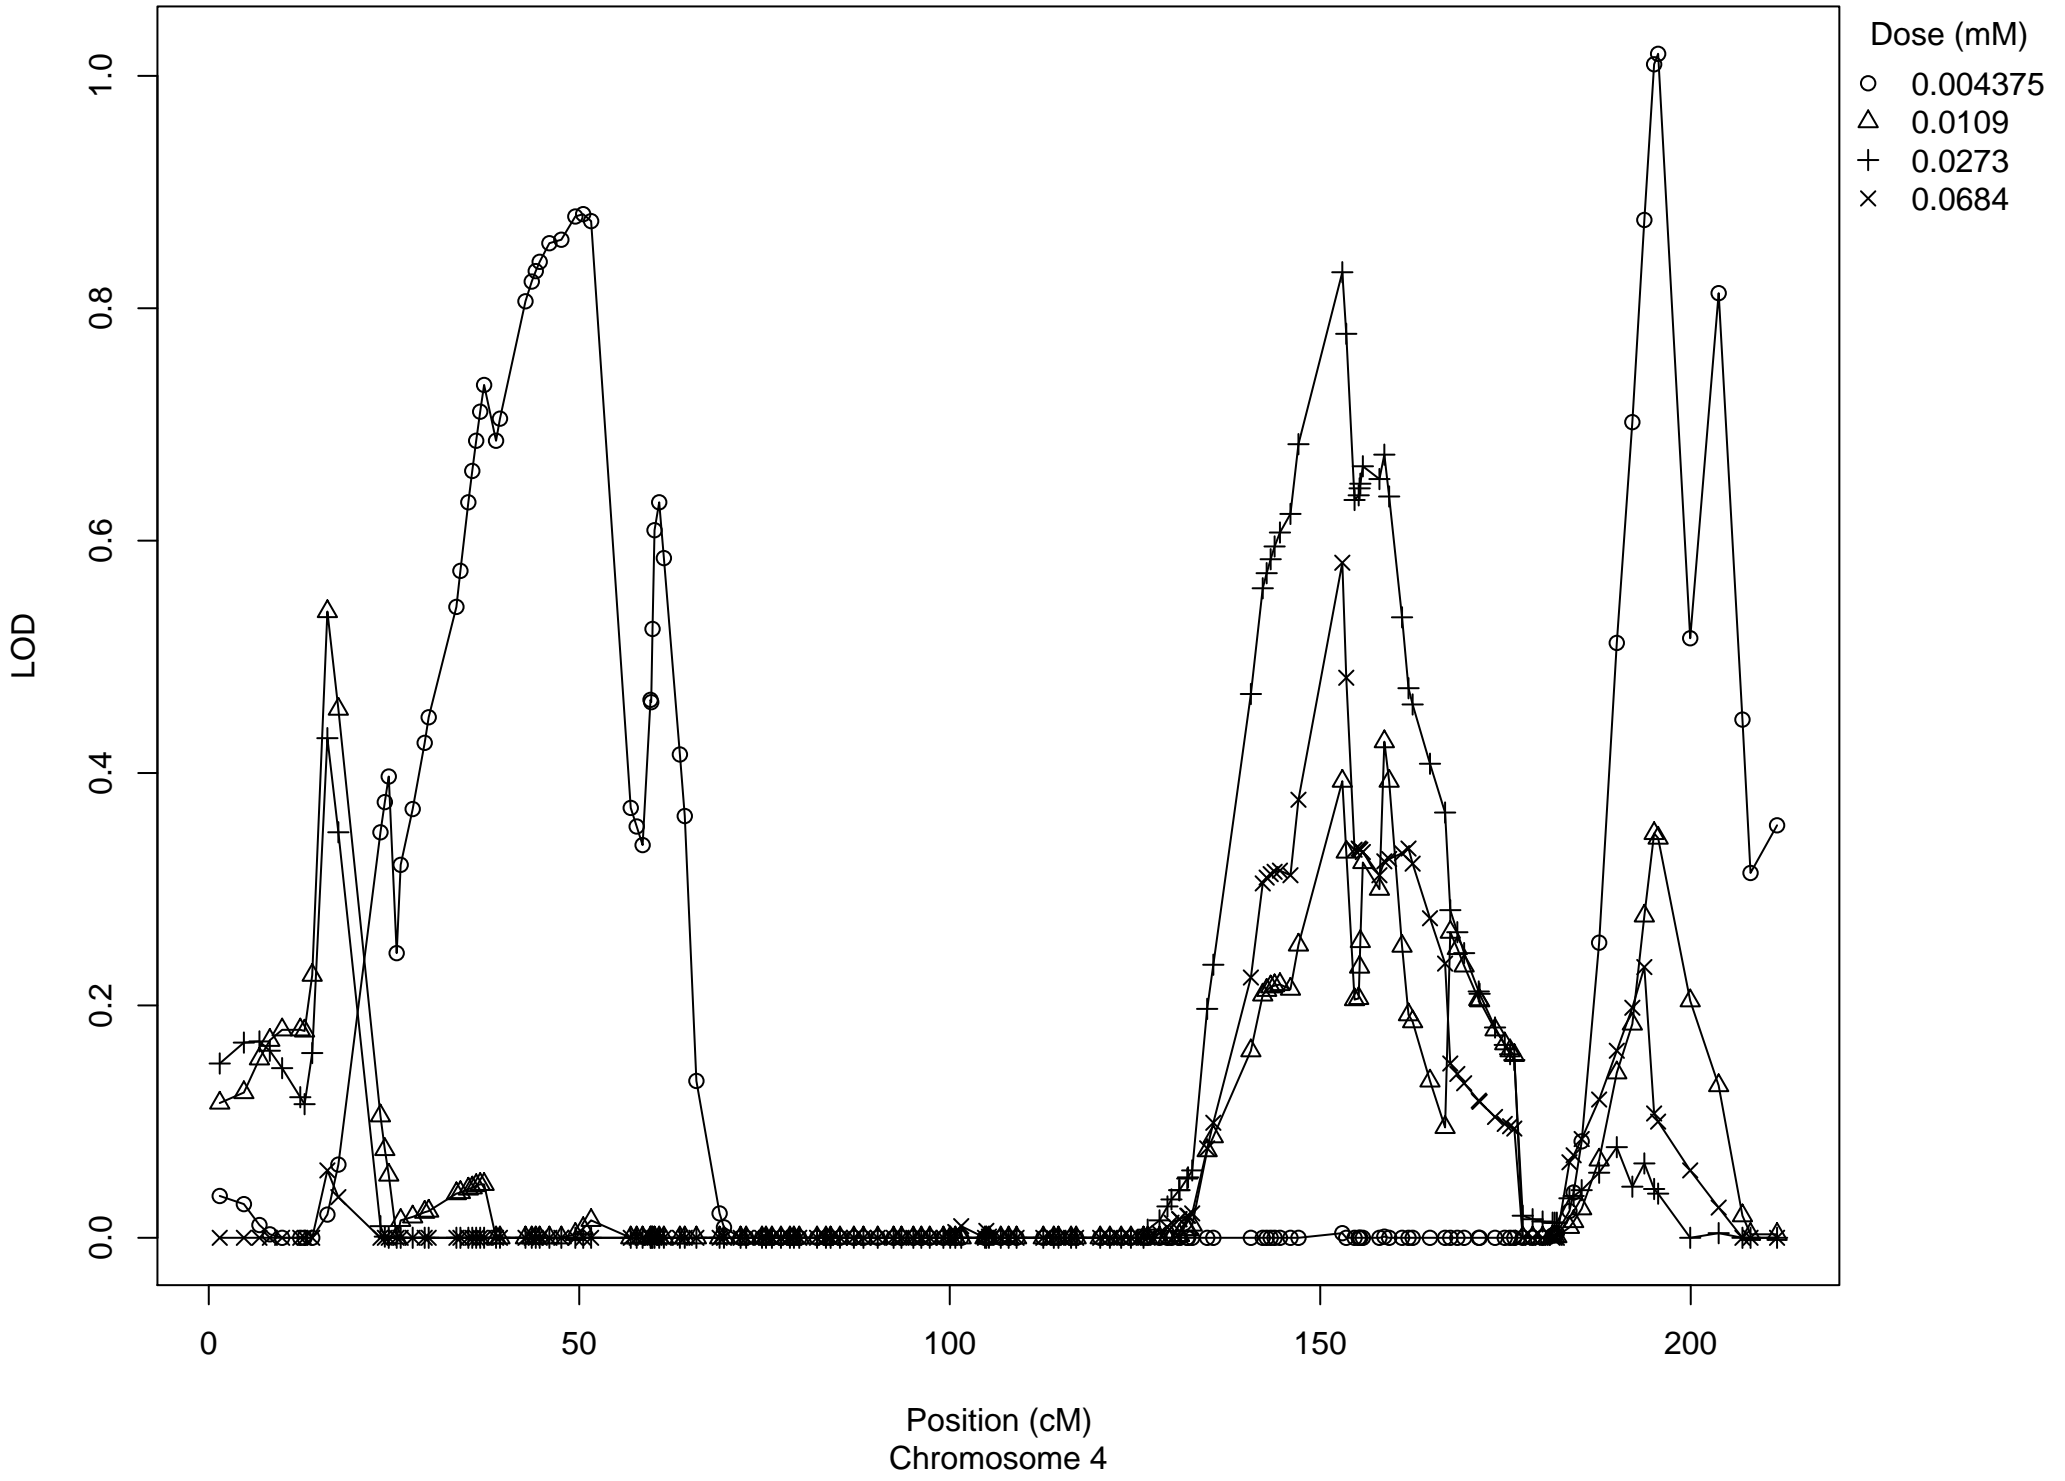



# 5-azacytidine (Aza)

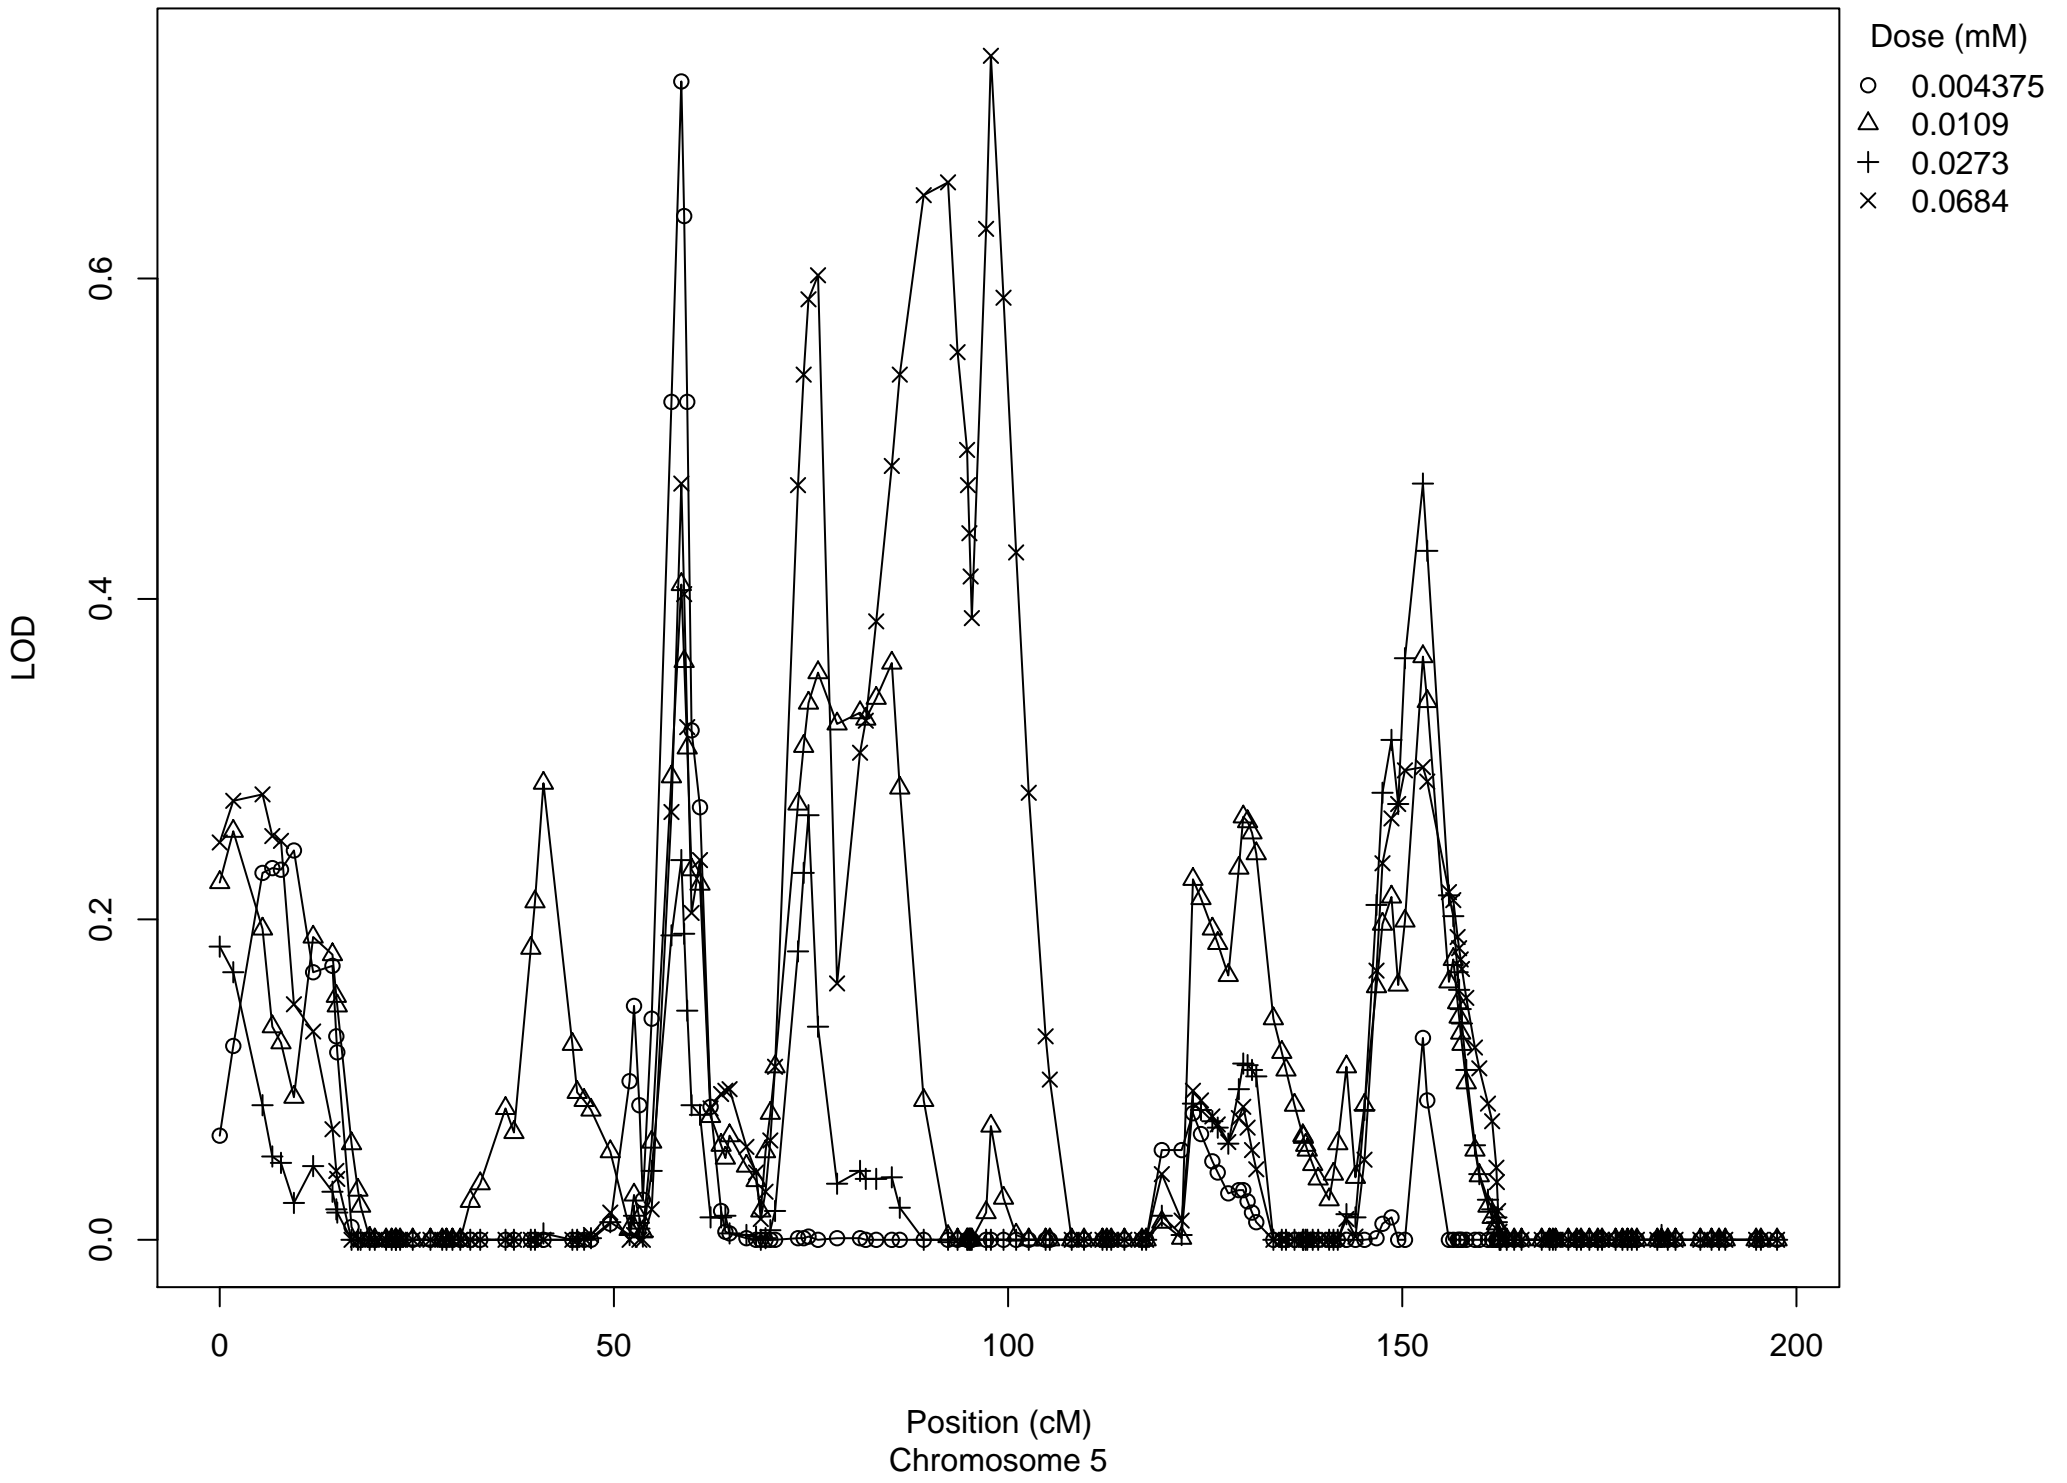

# 5-azacytidine (Aza)

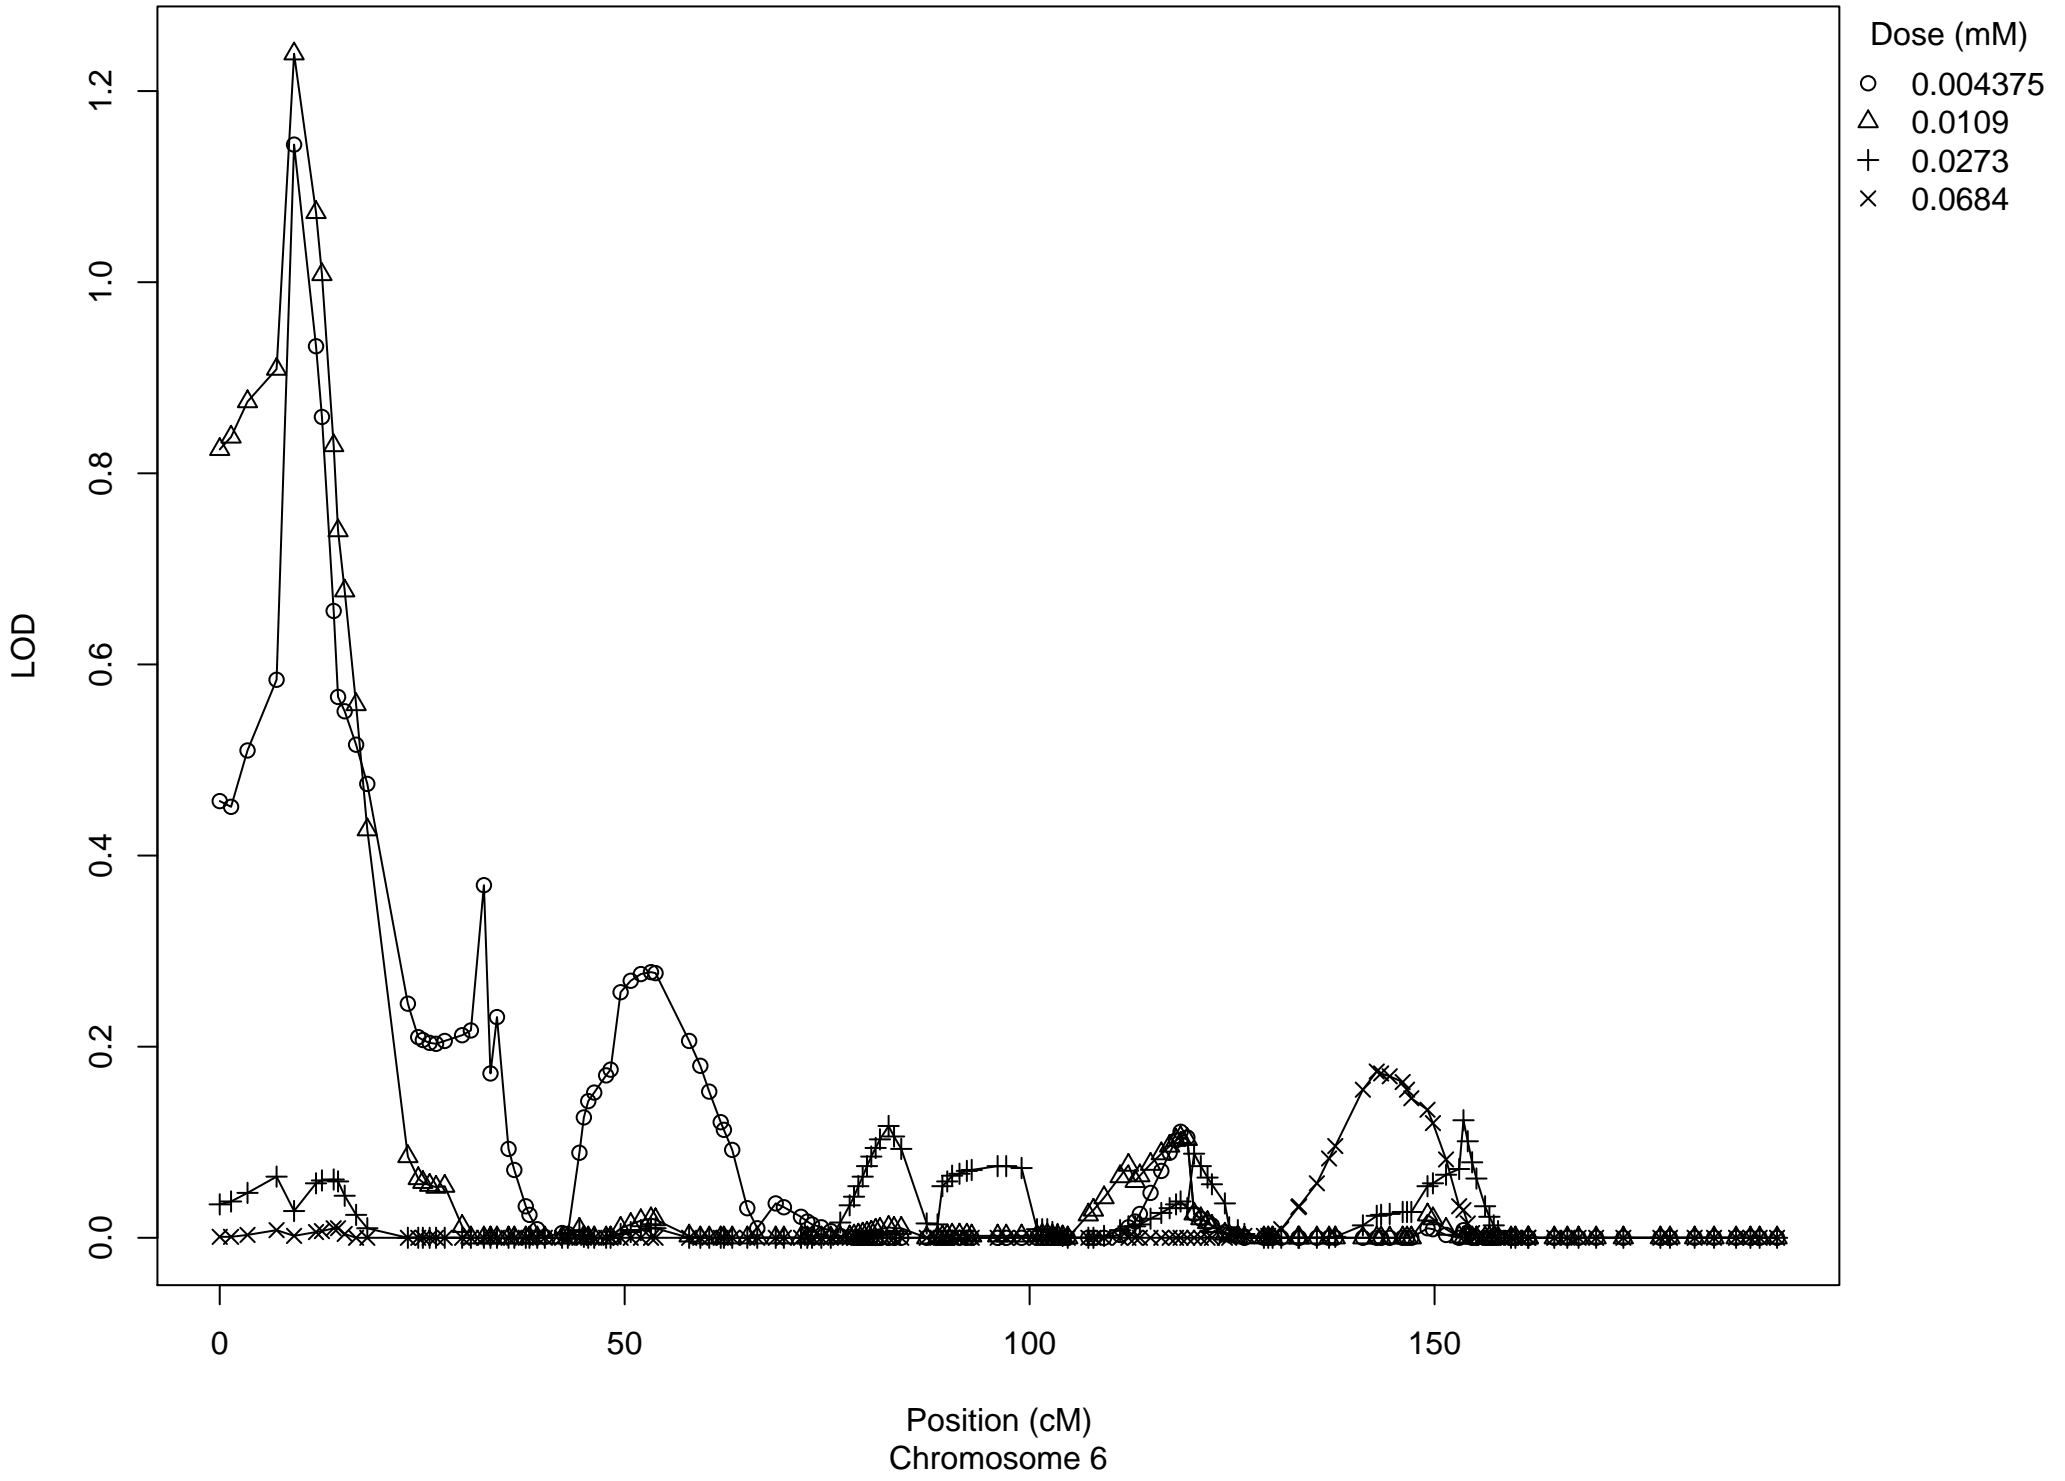

# 5-azacytidine (Aza)

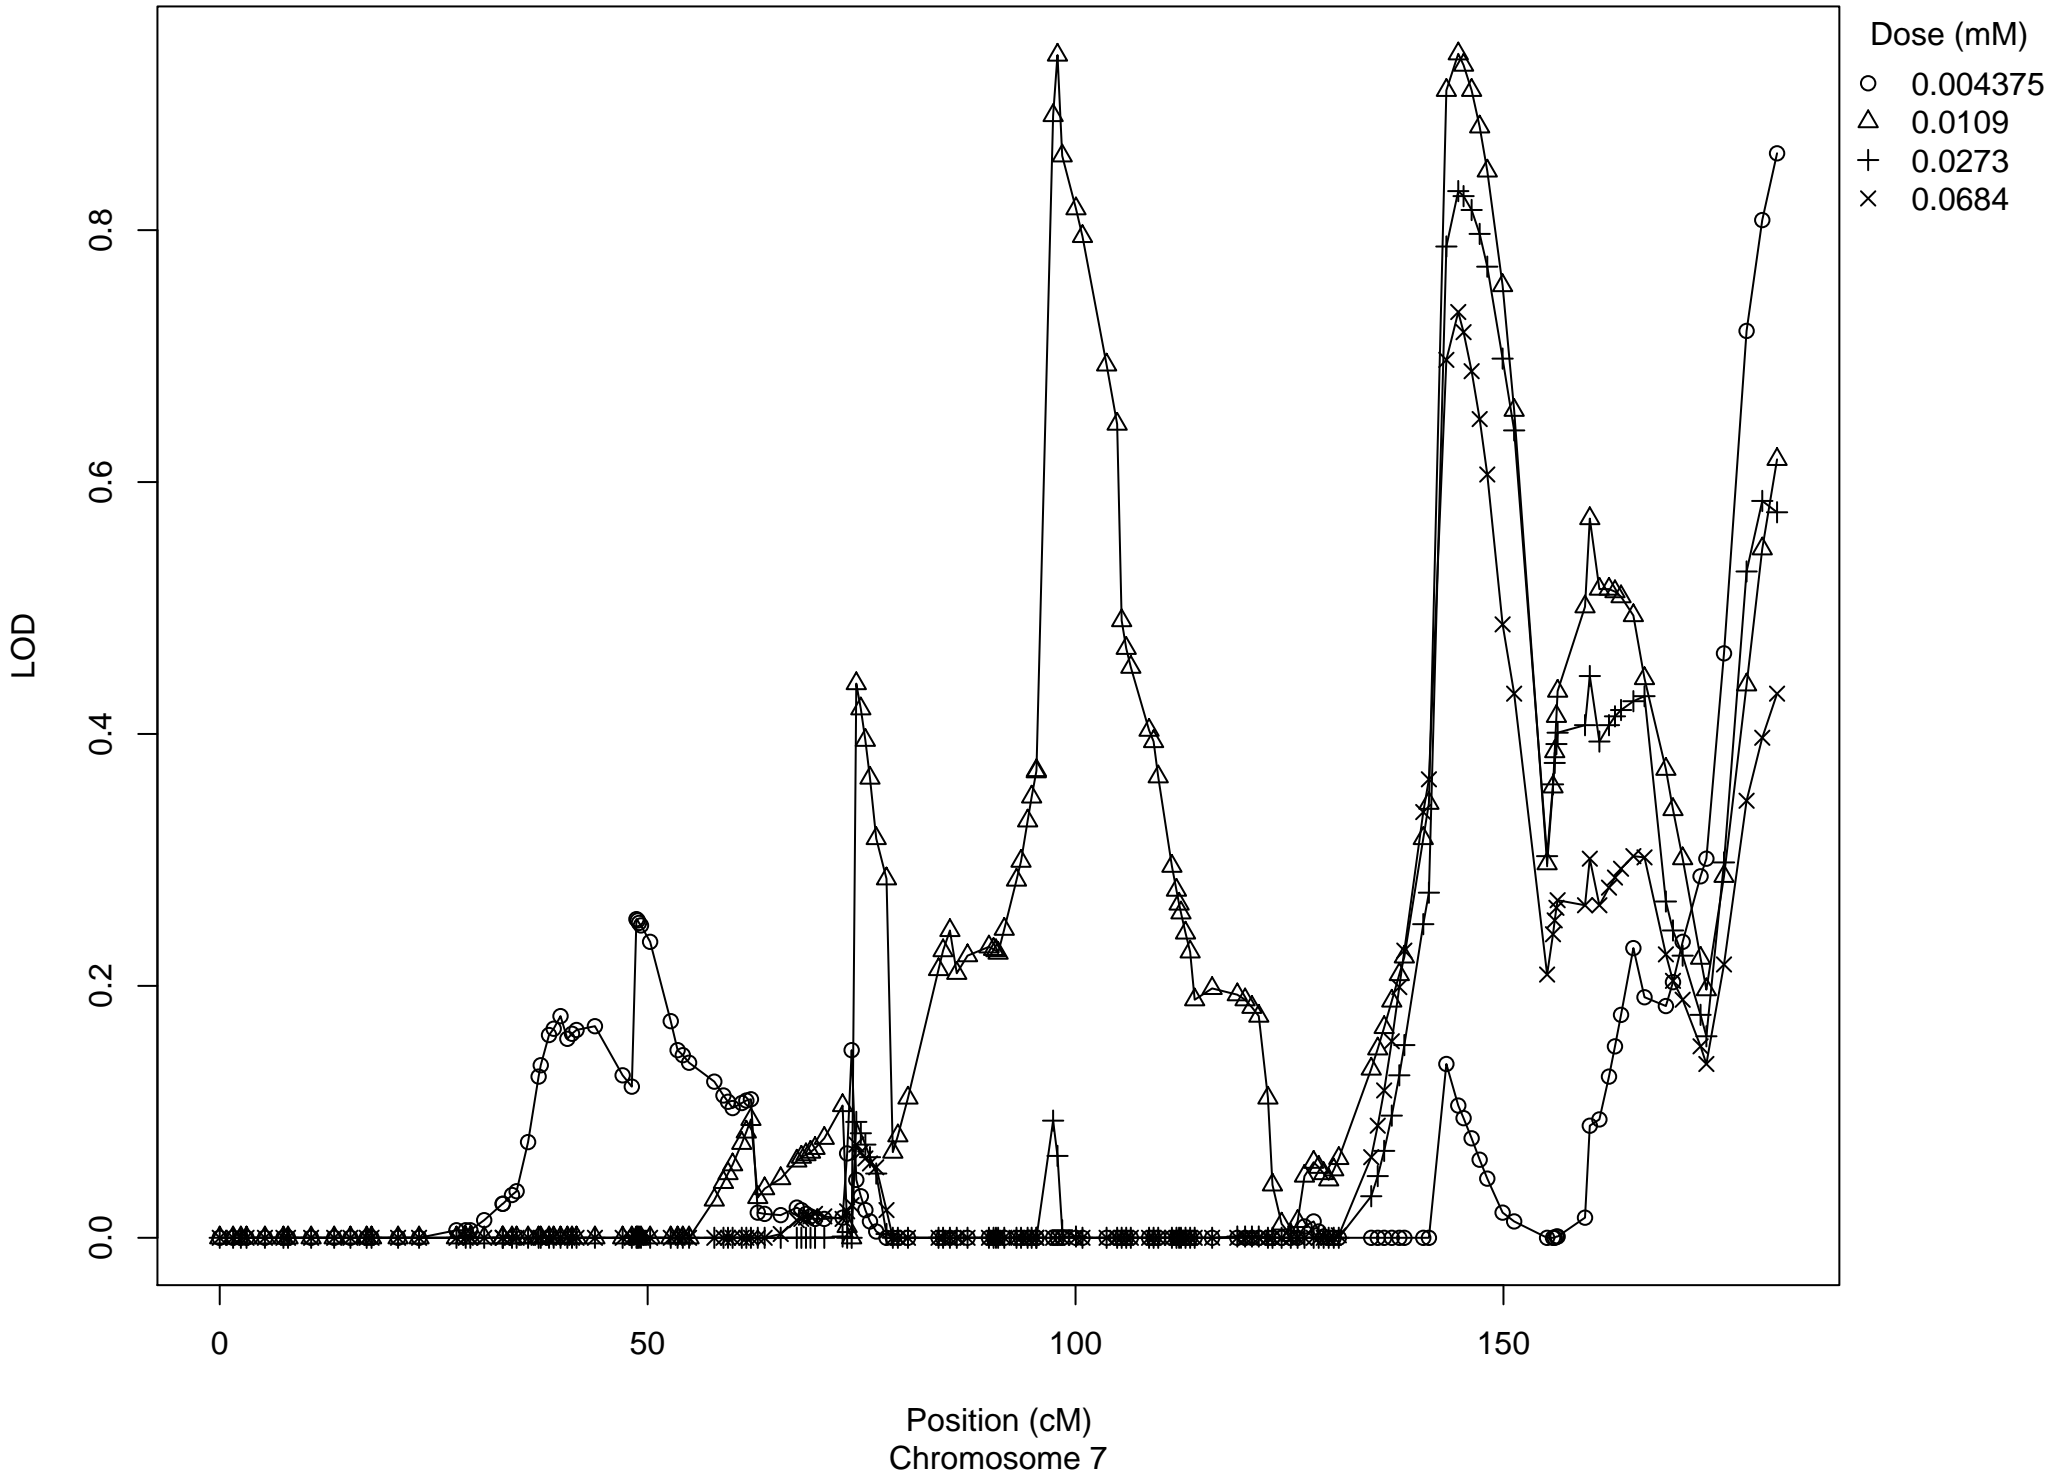

# 5-azacytidine (Aza)

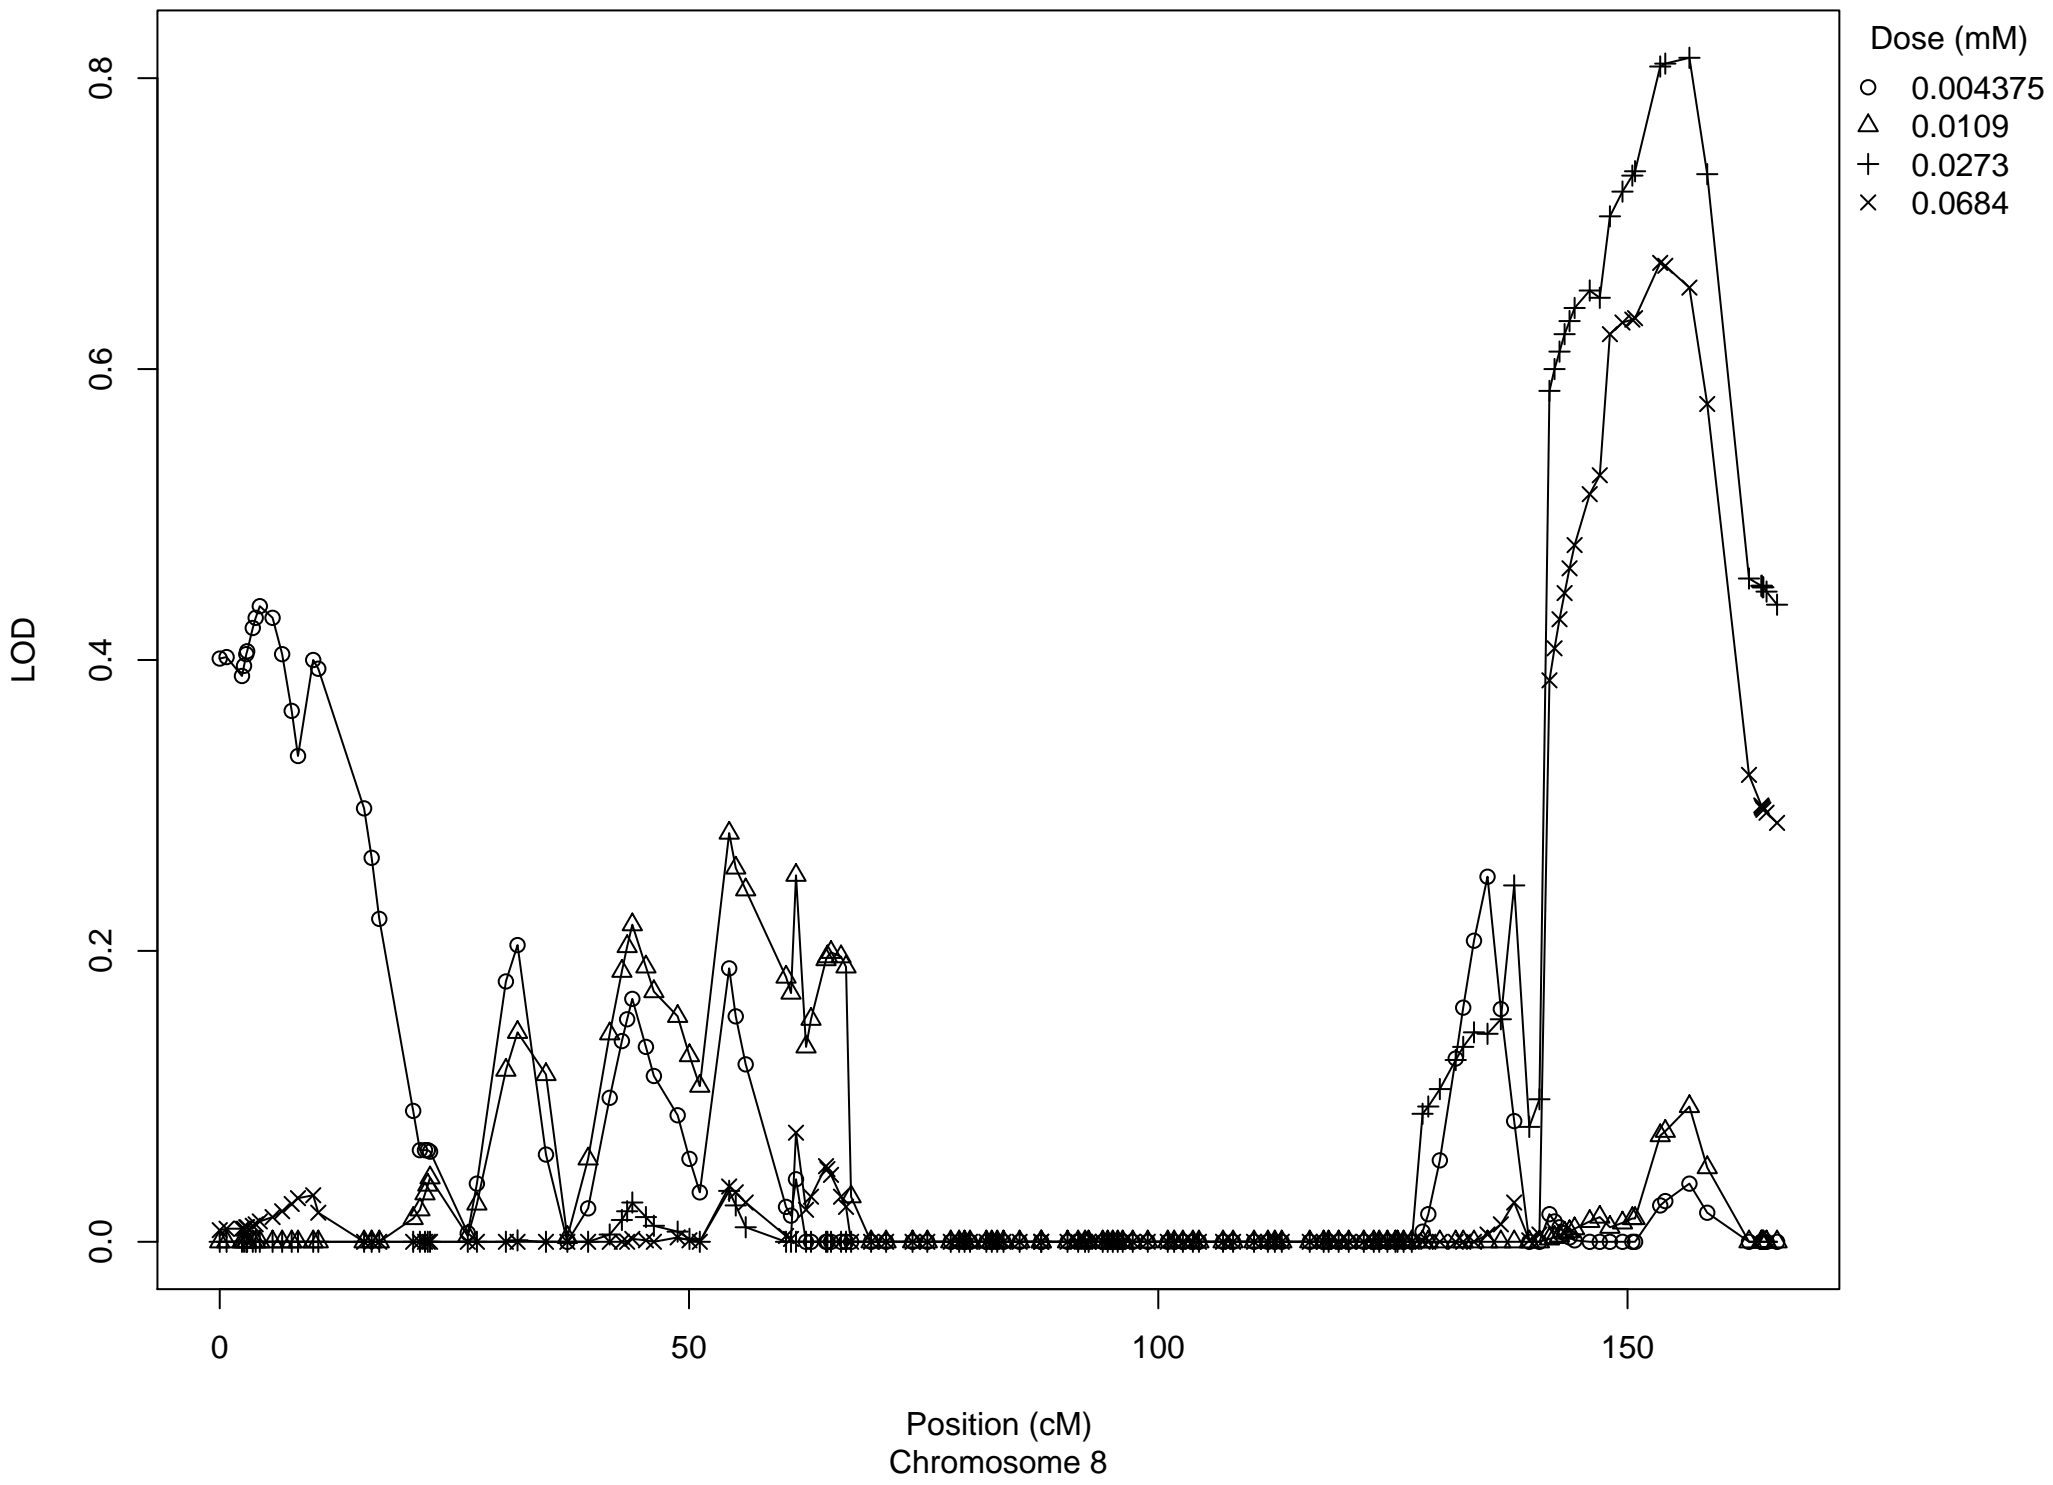

# 5-azacytidine (Aza)

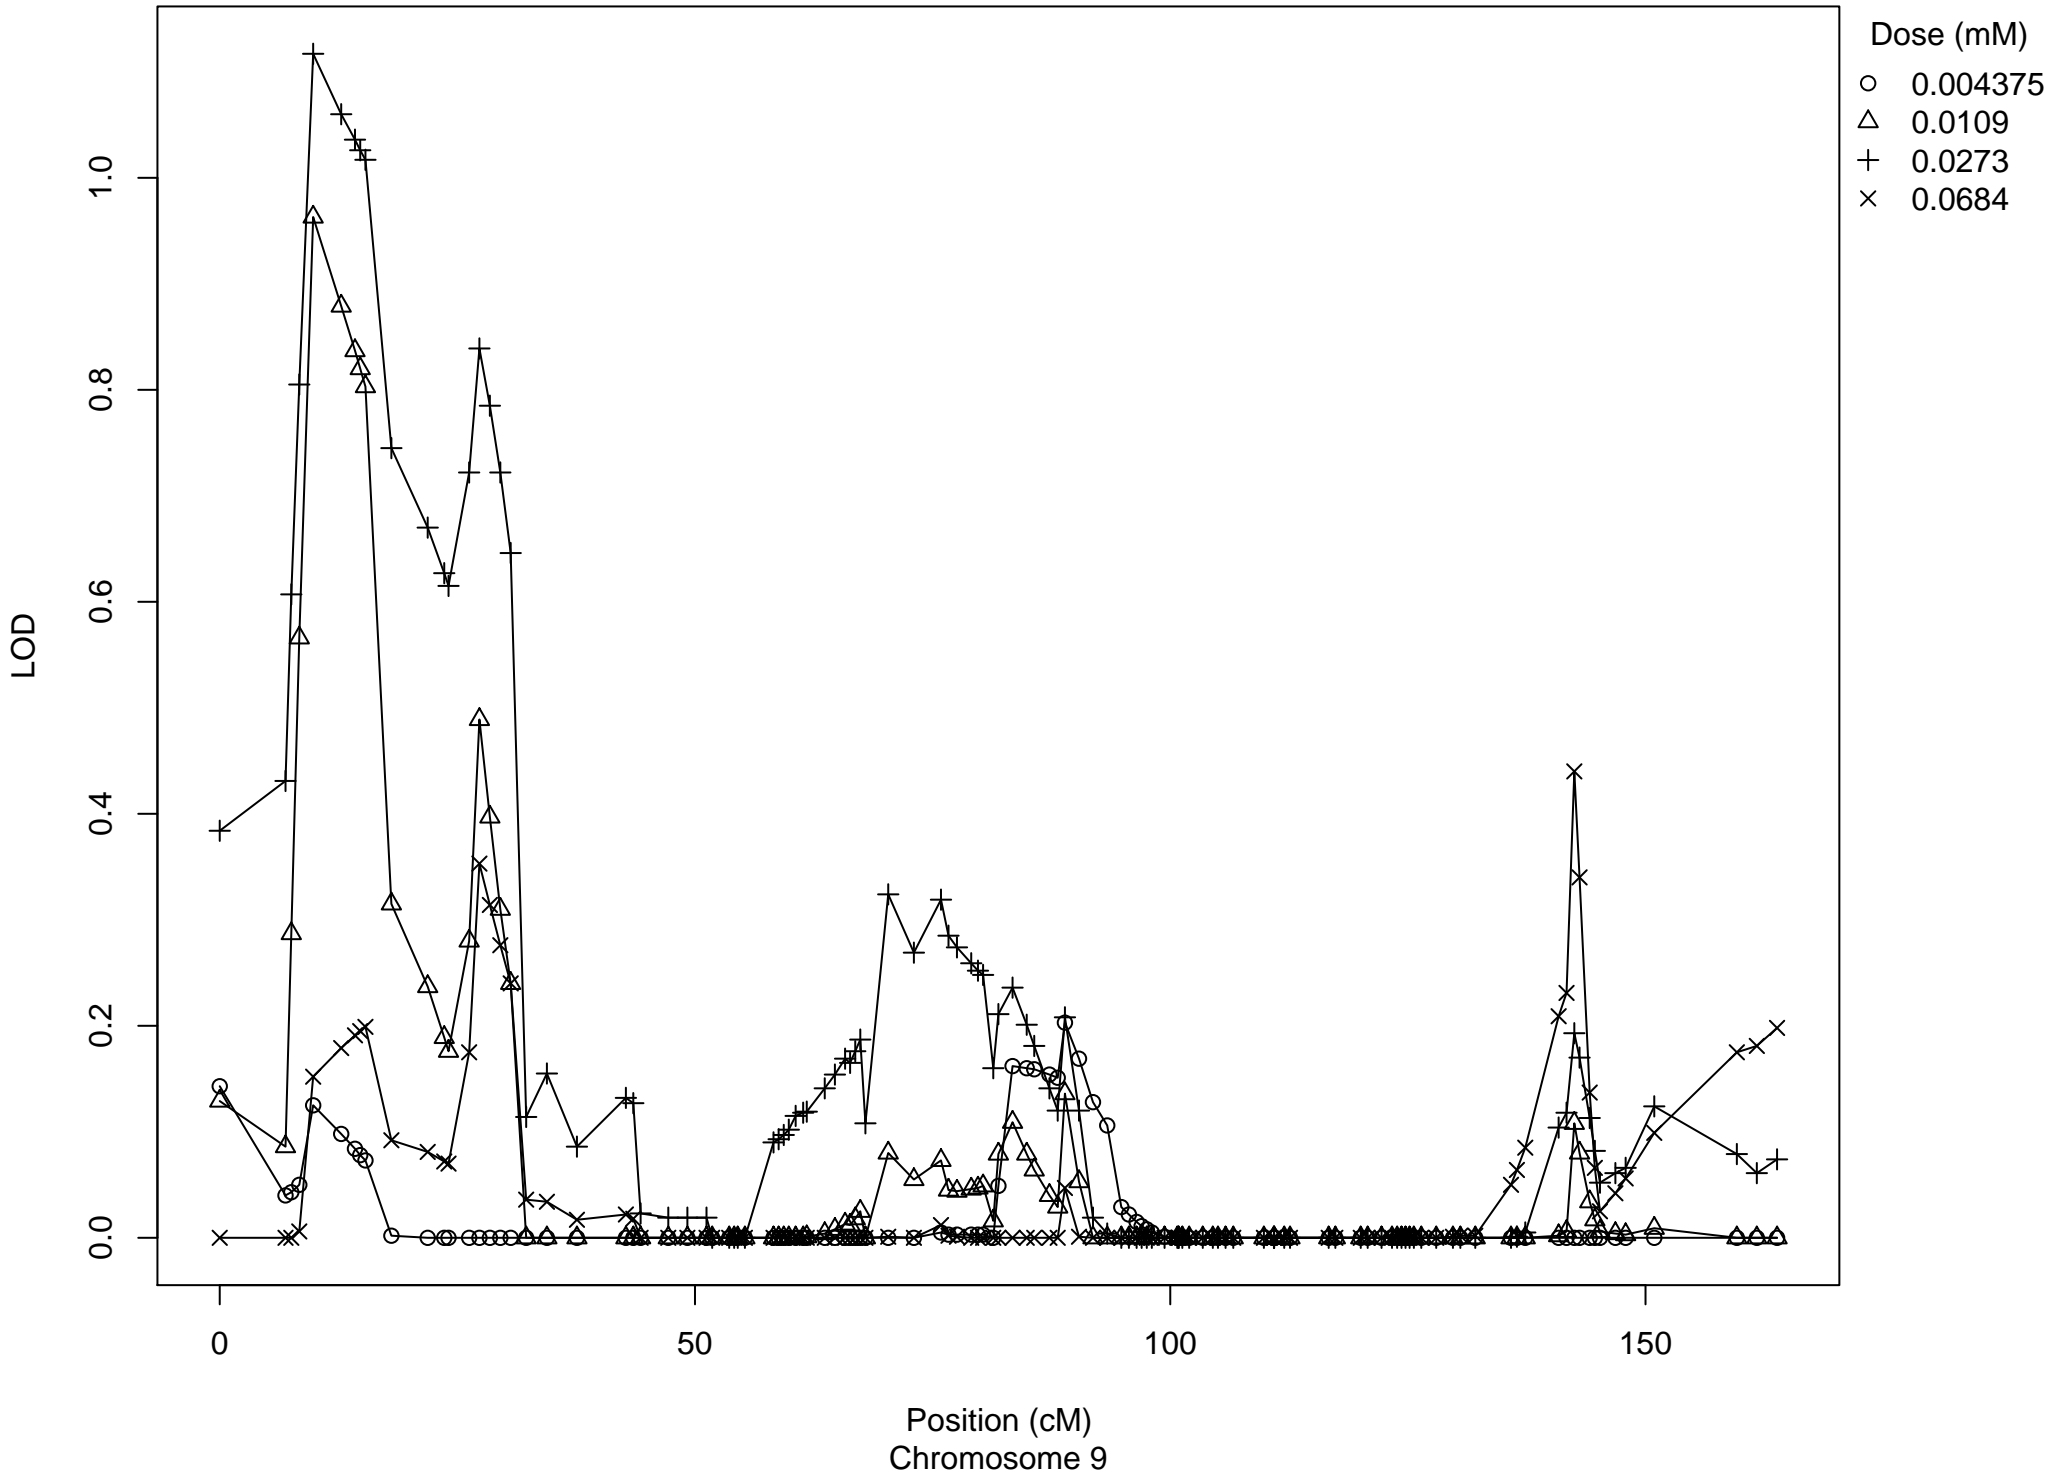

# 5-azacytidine (Aza)

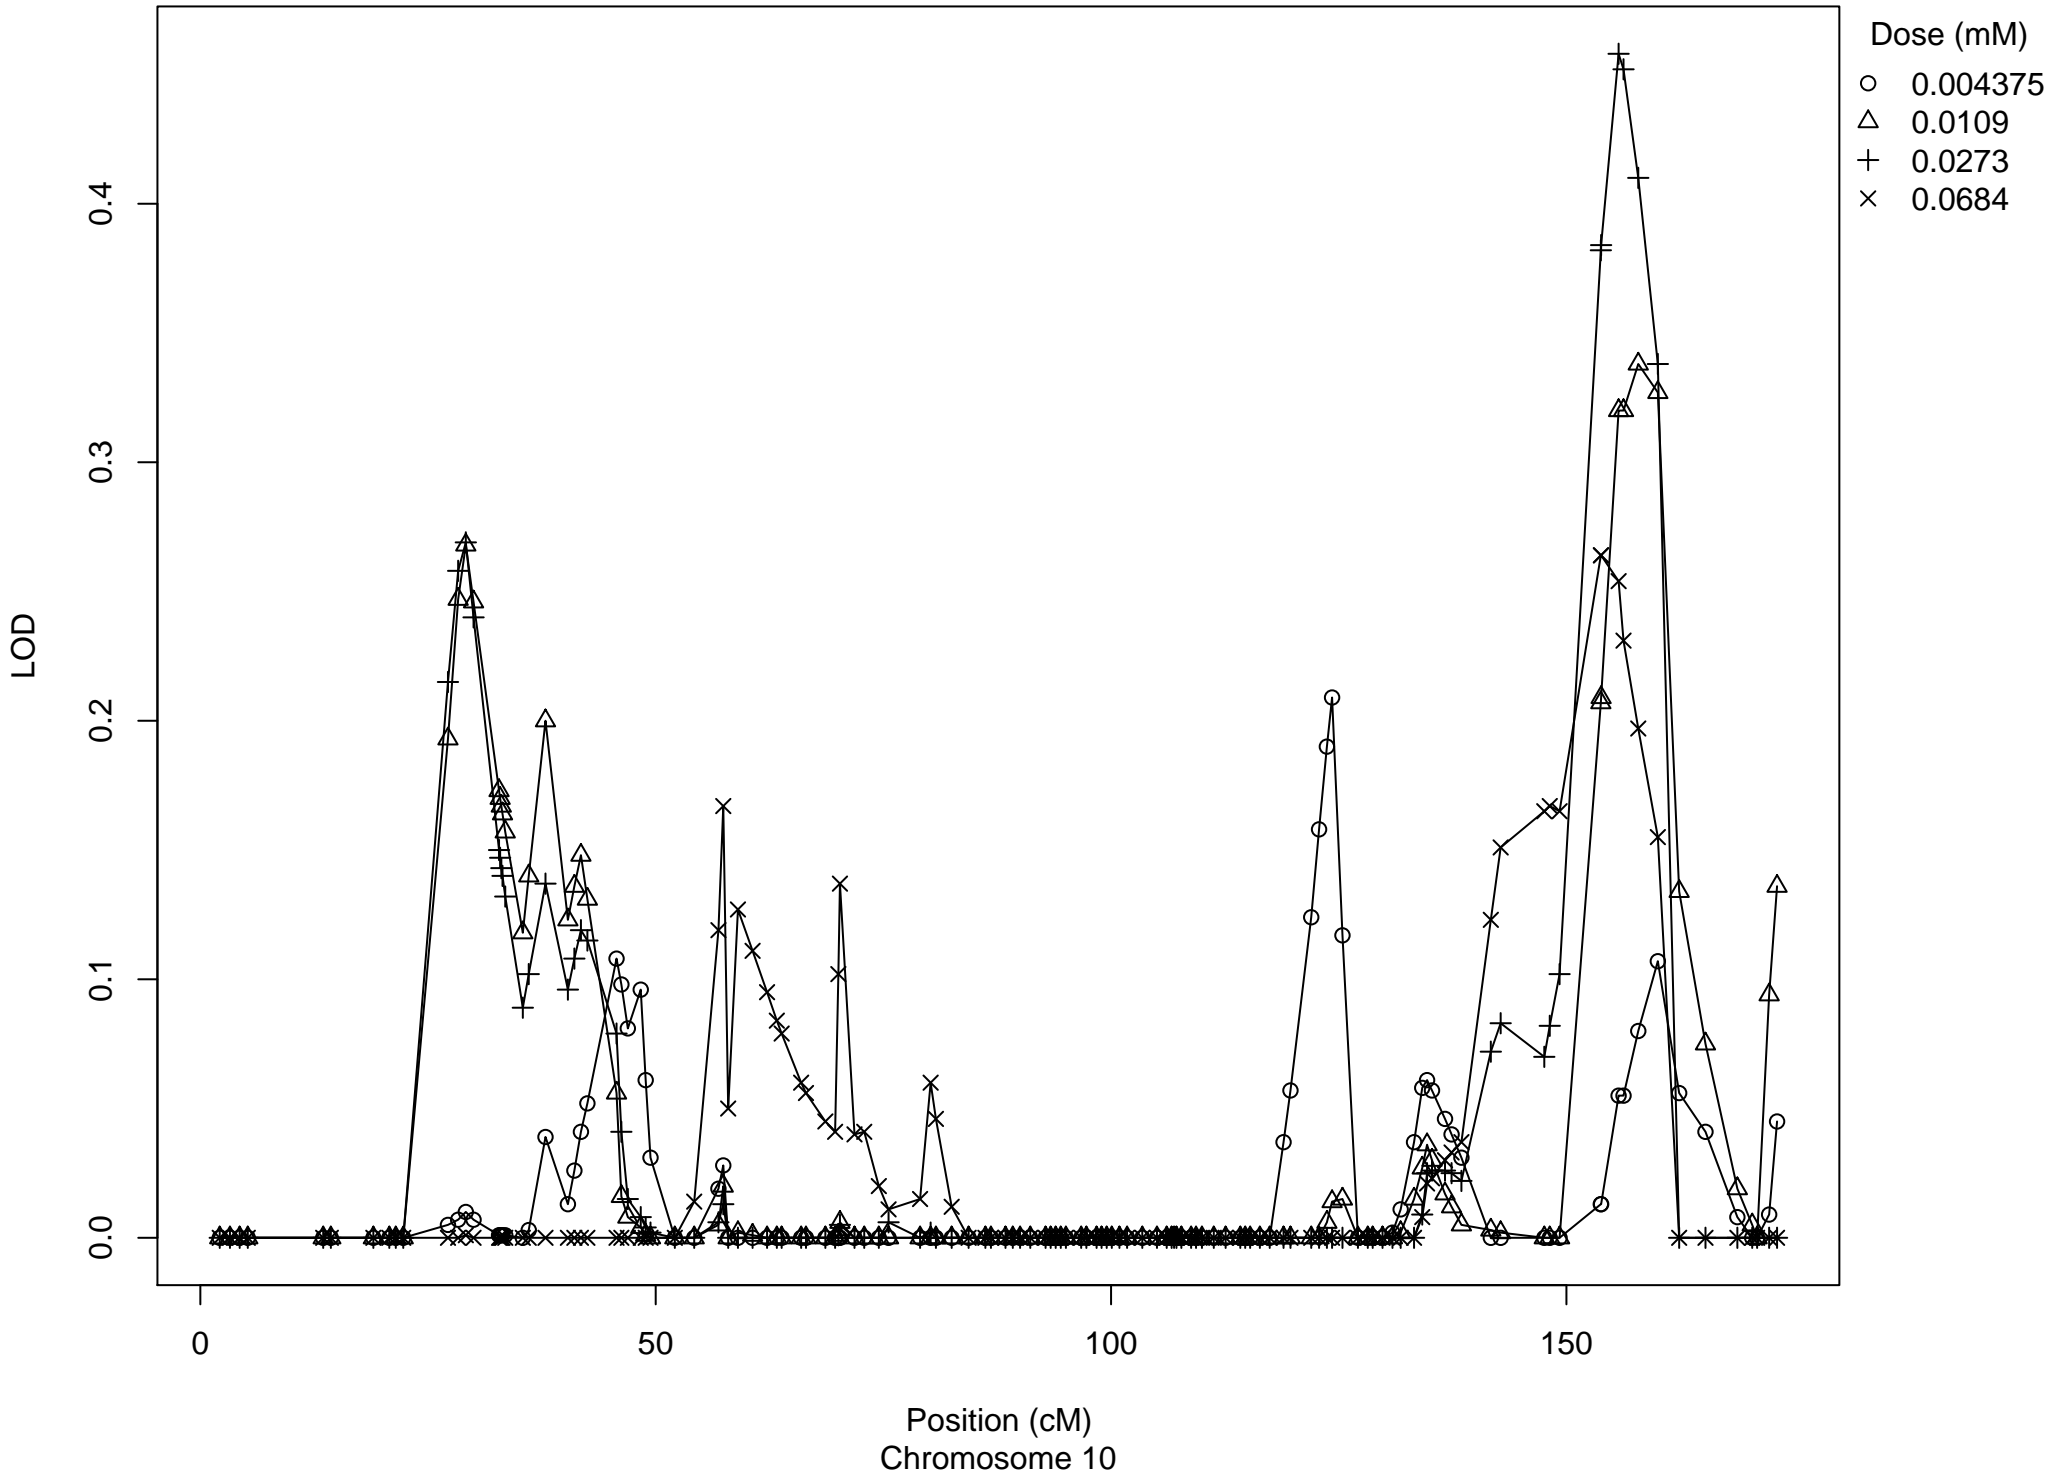

# 5-azacytidine (Aza)

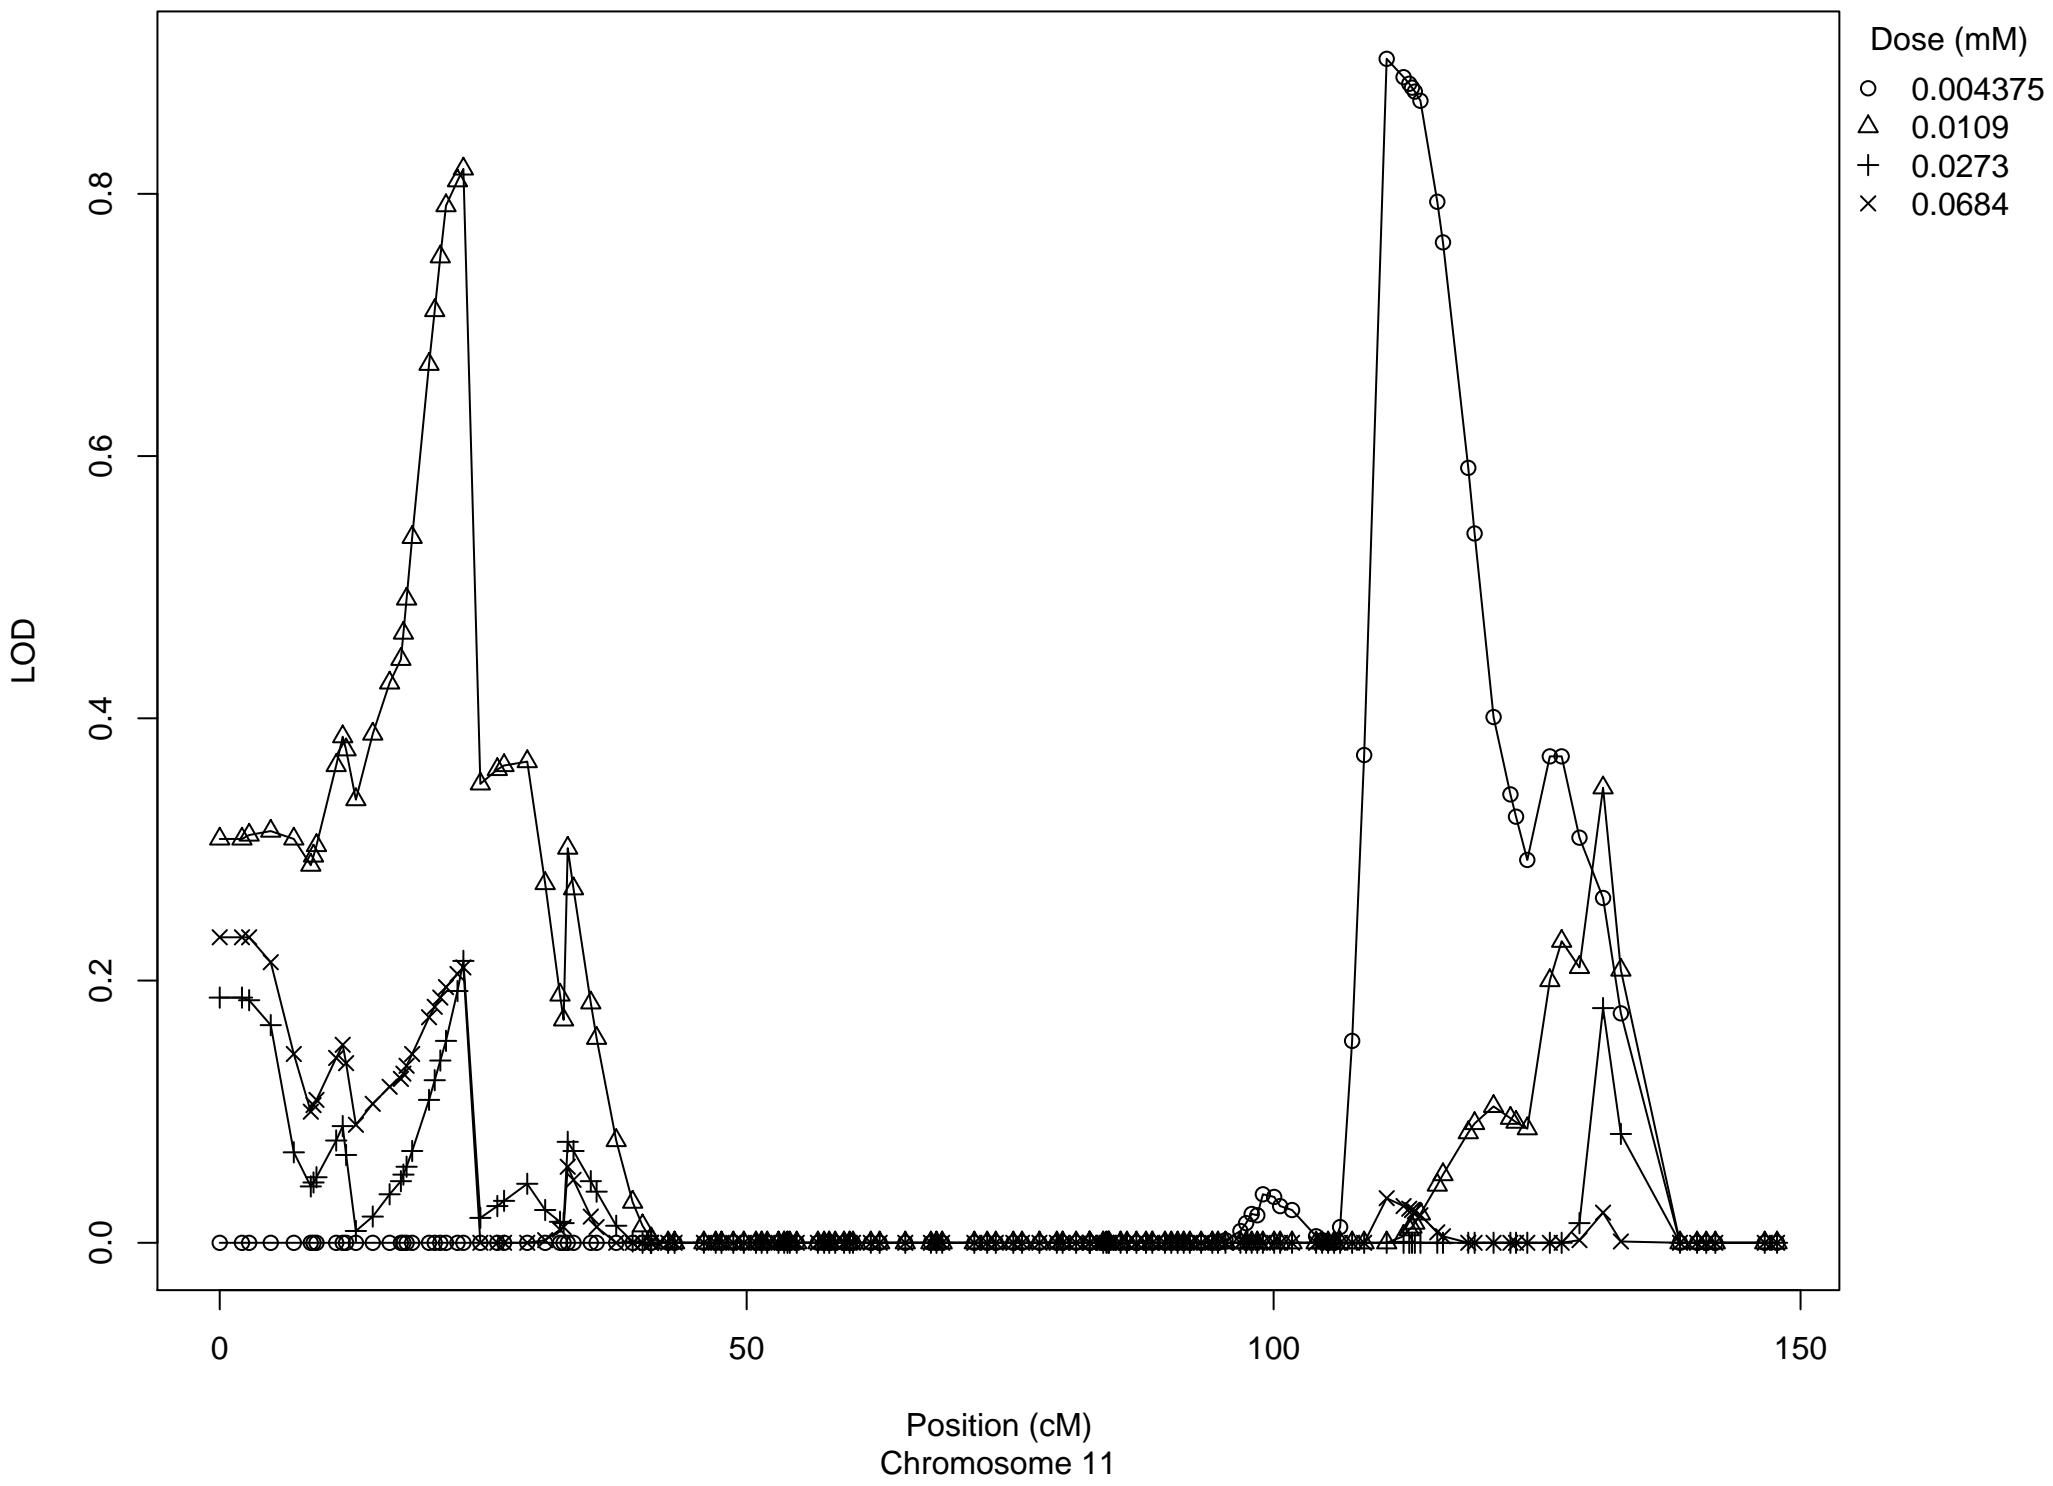

# 5-azacytidine (Aza)

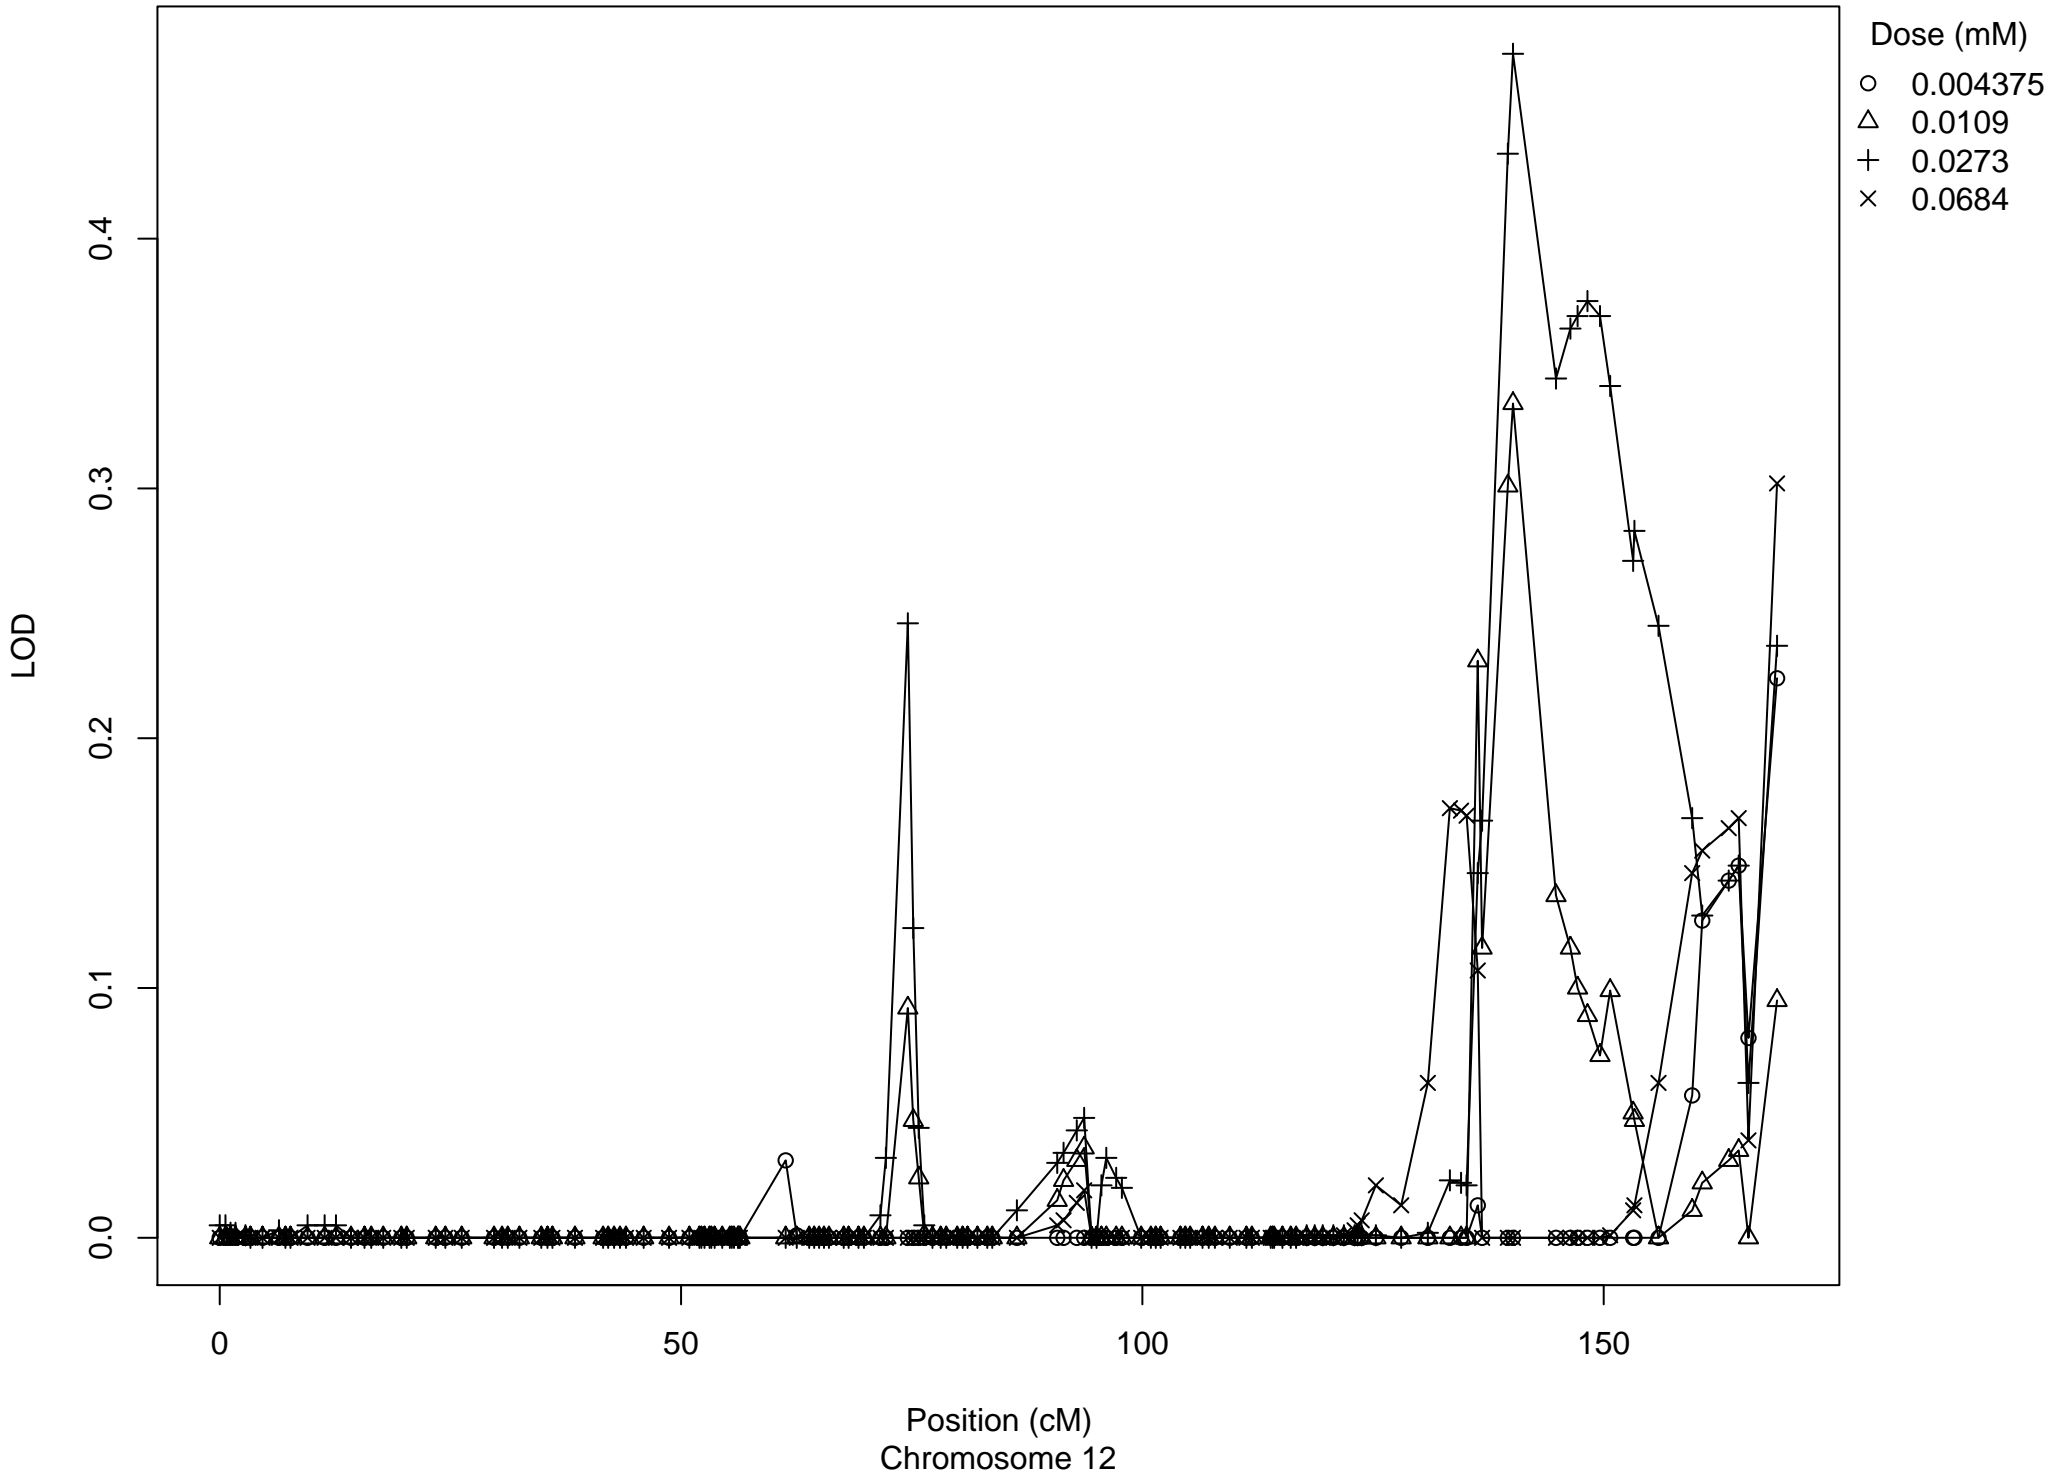



# 5-azacytidine (Aza)

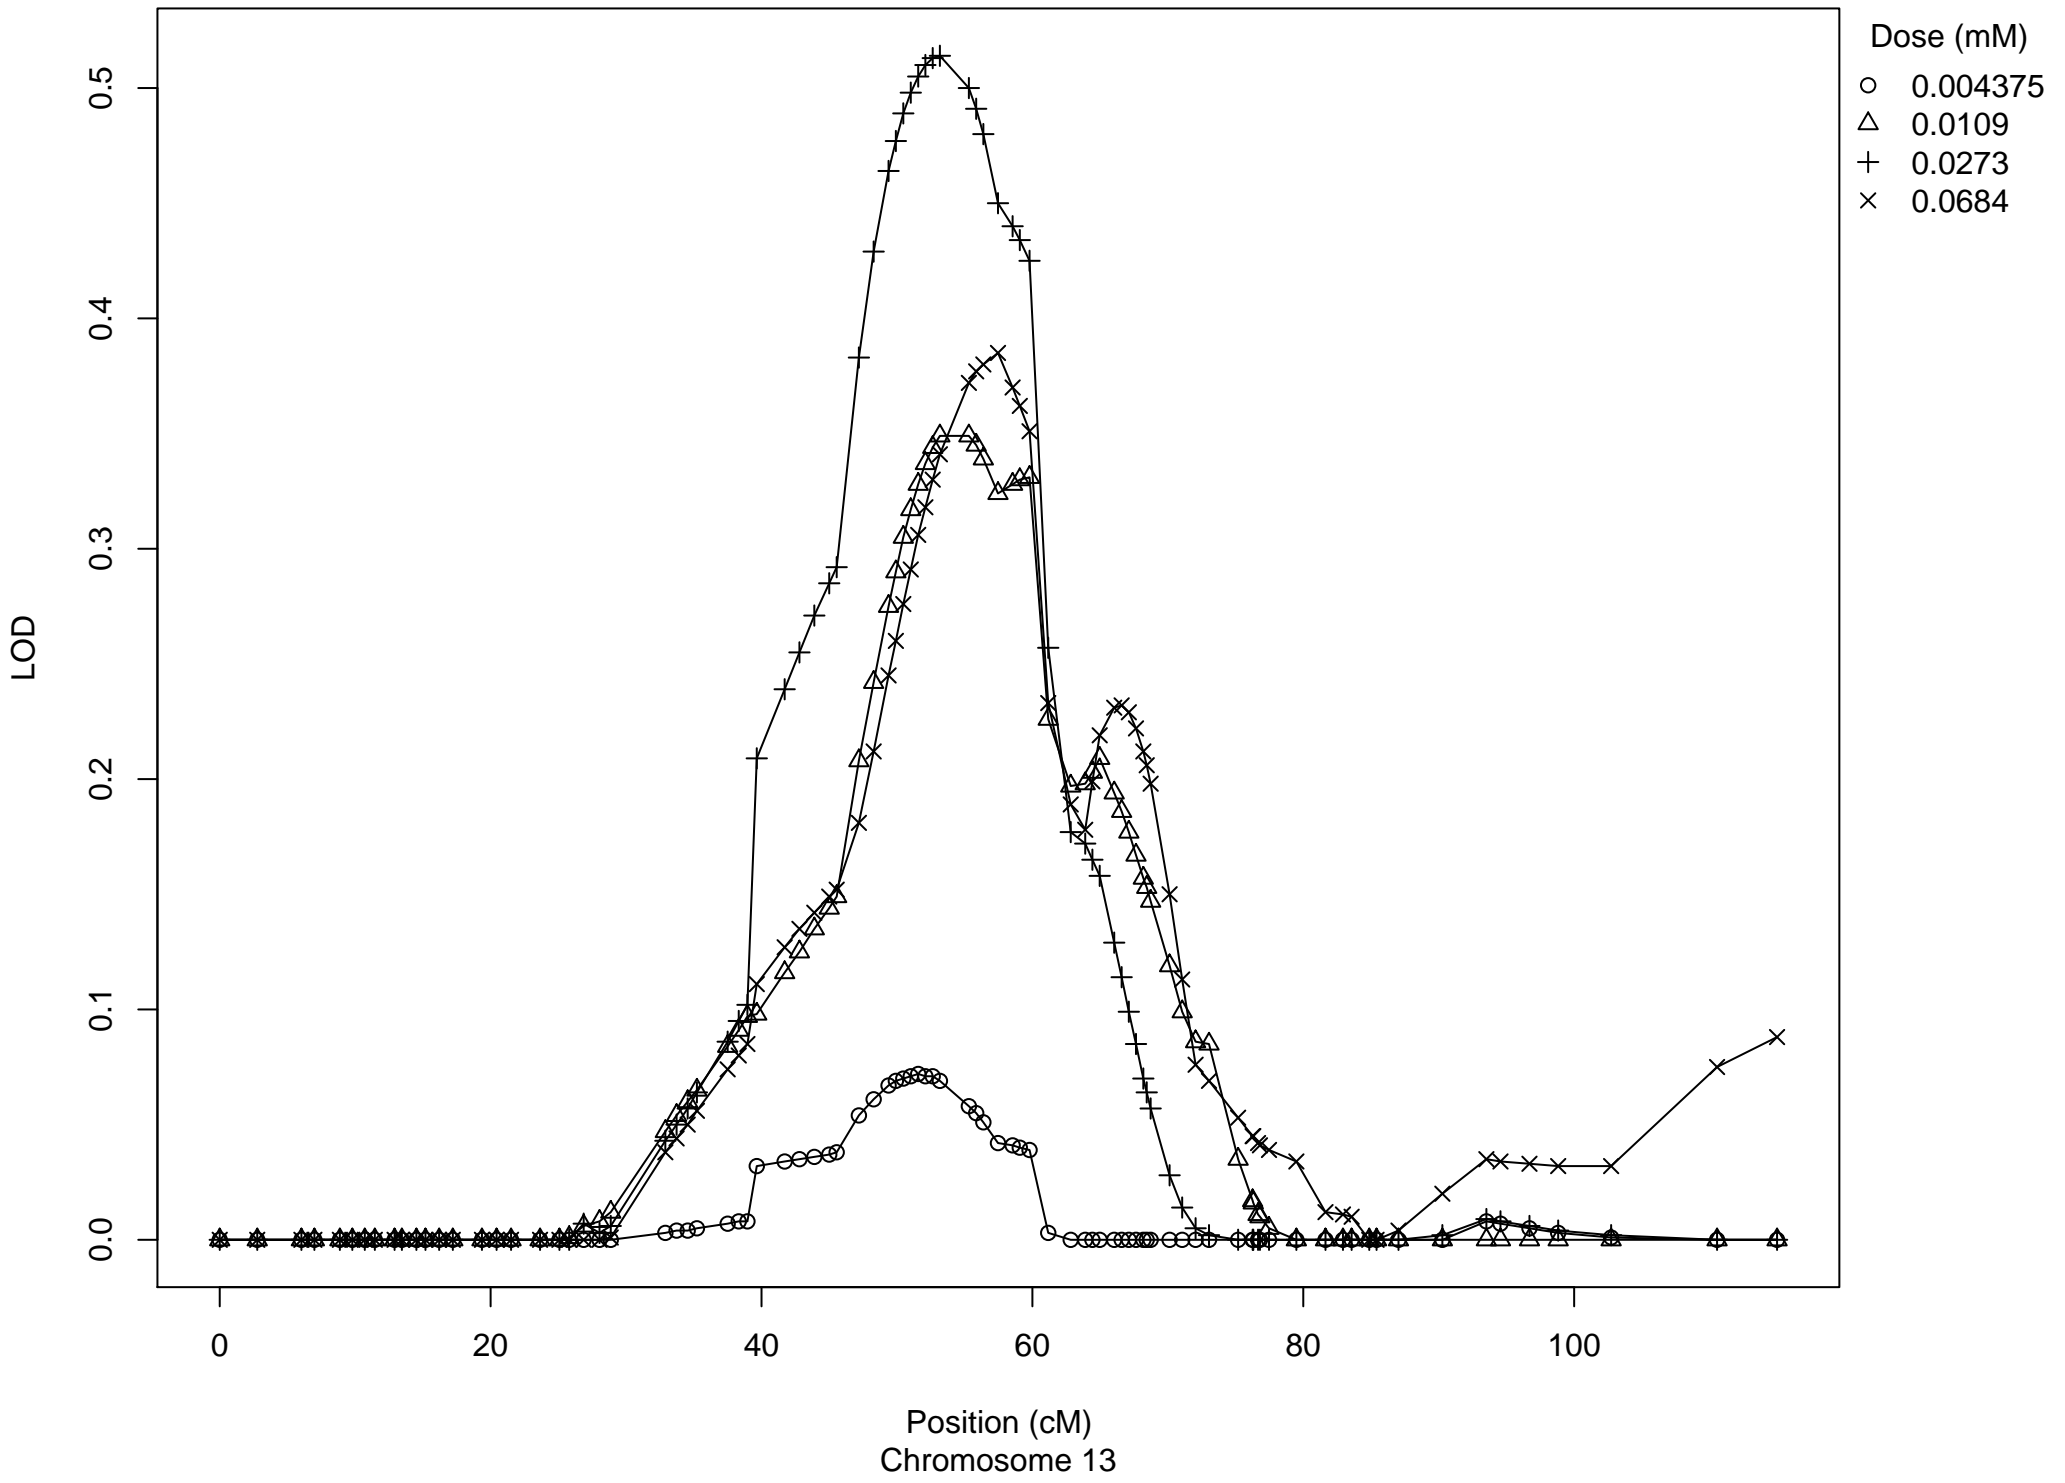

# 5-azacytidine (Aza)

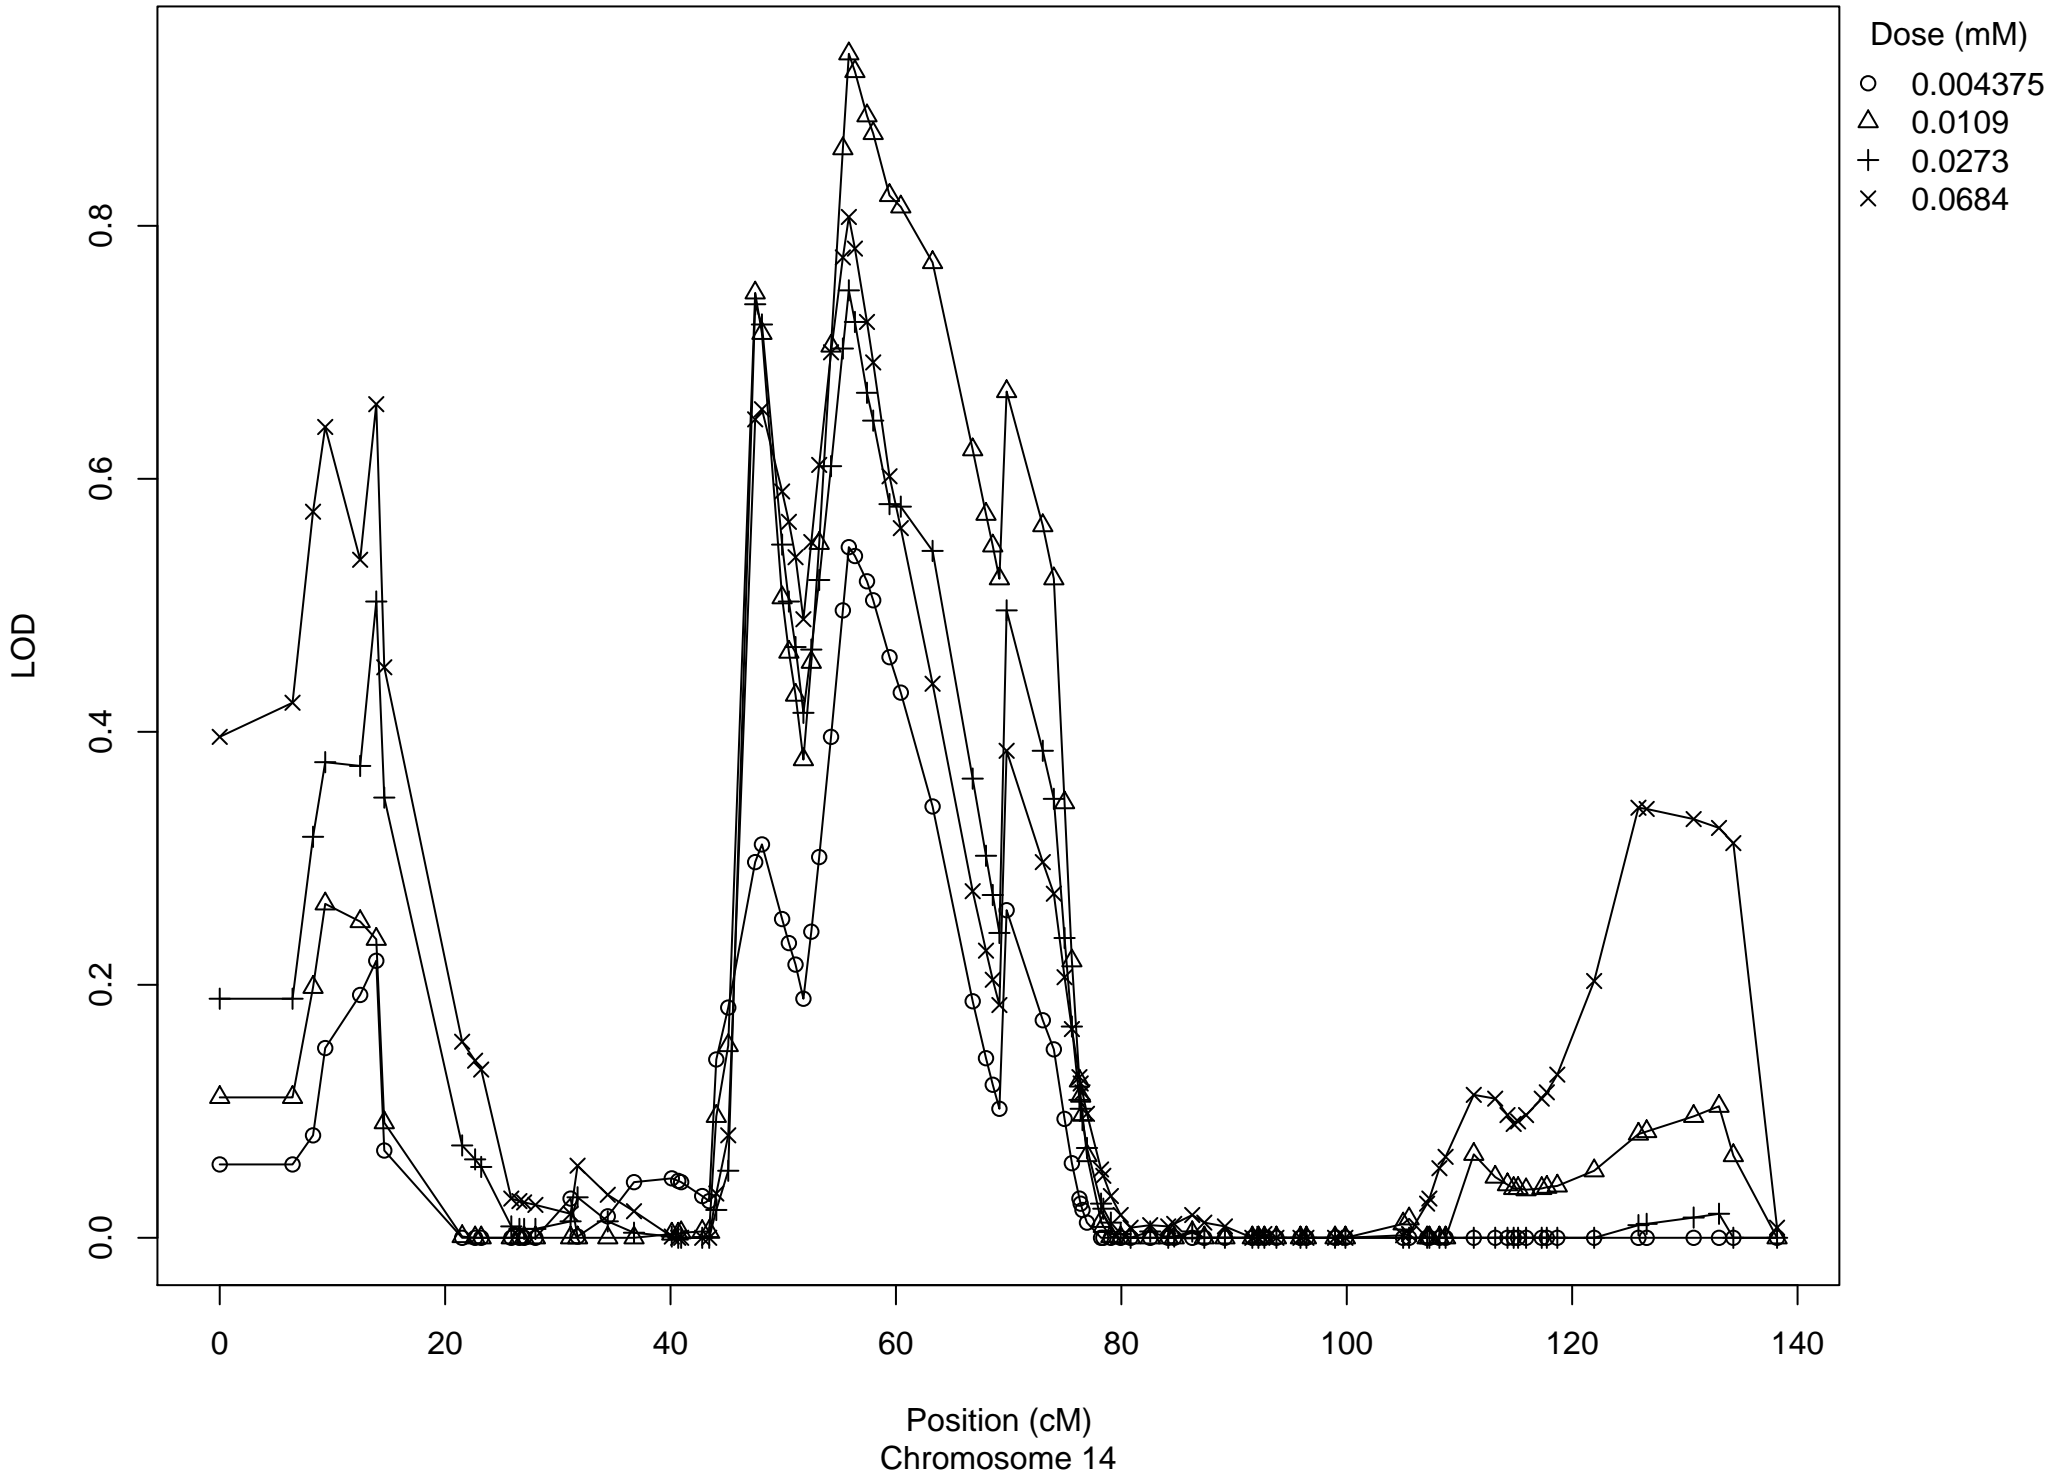

# 5-azacytidine (Aza)

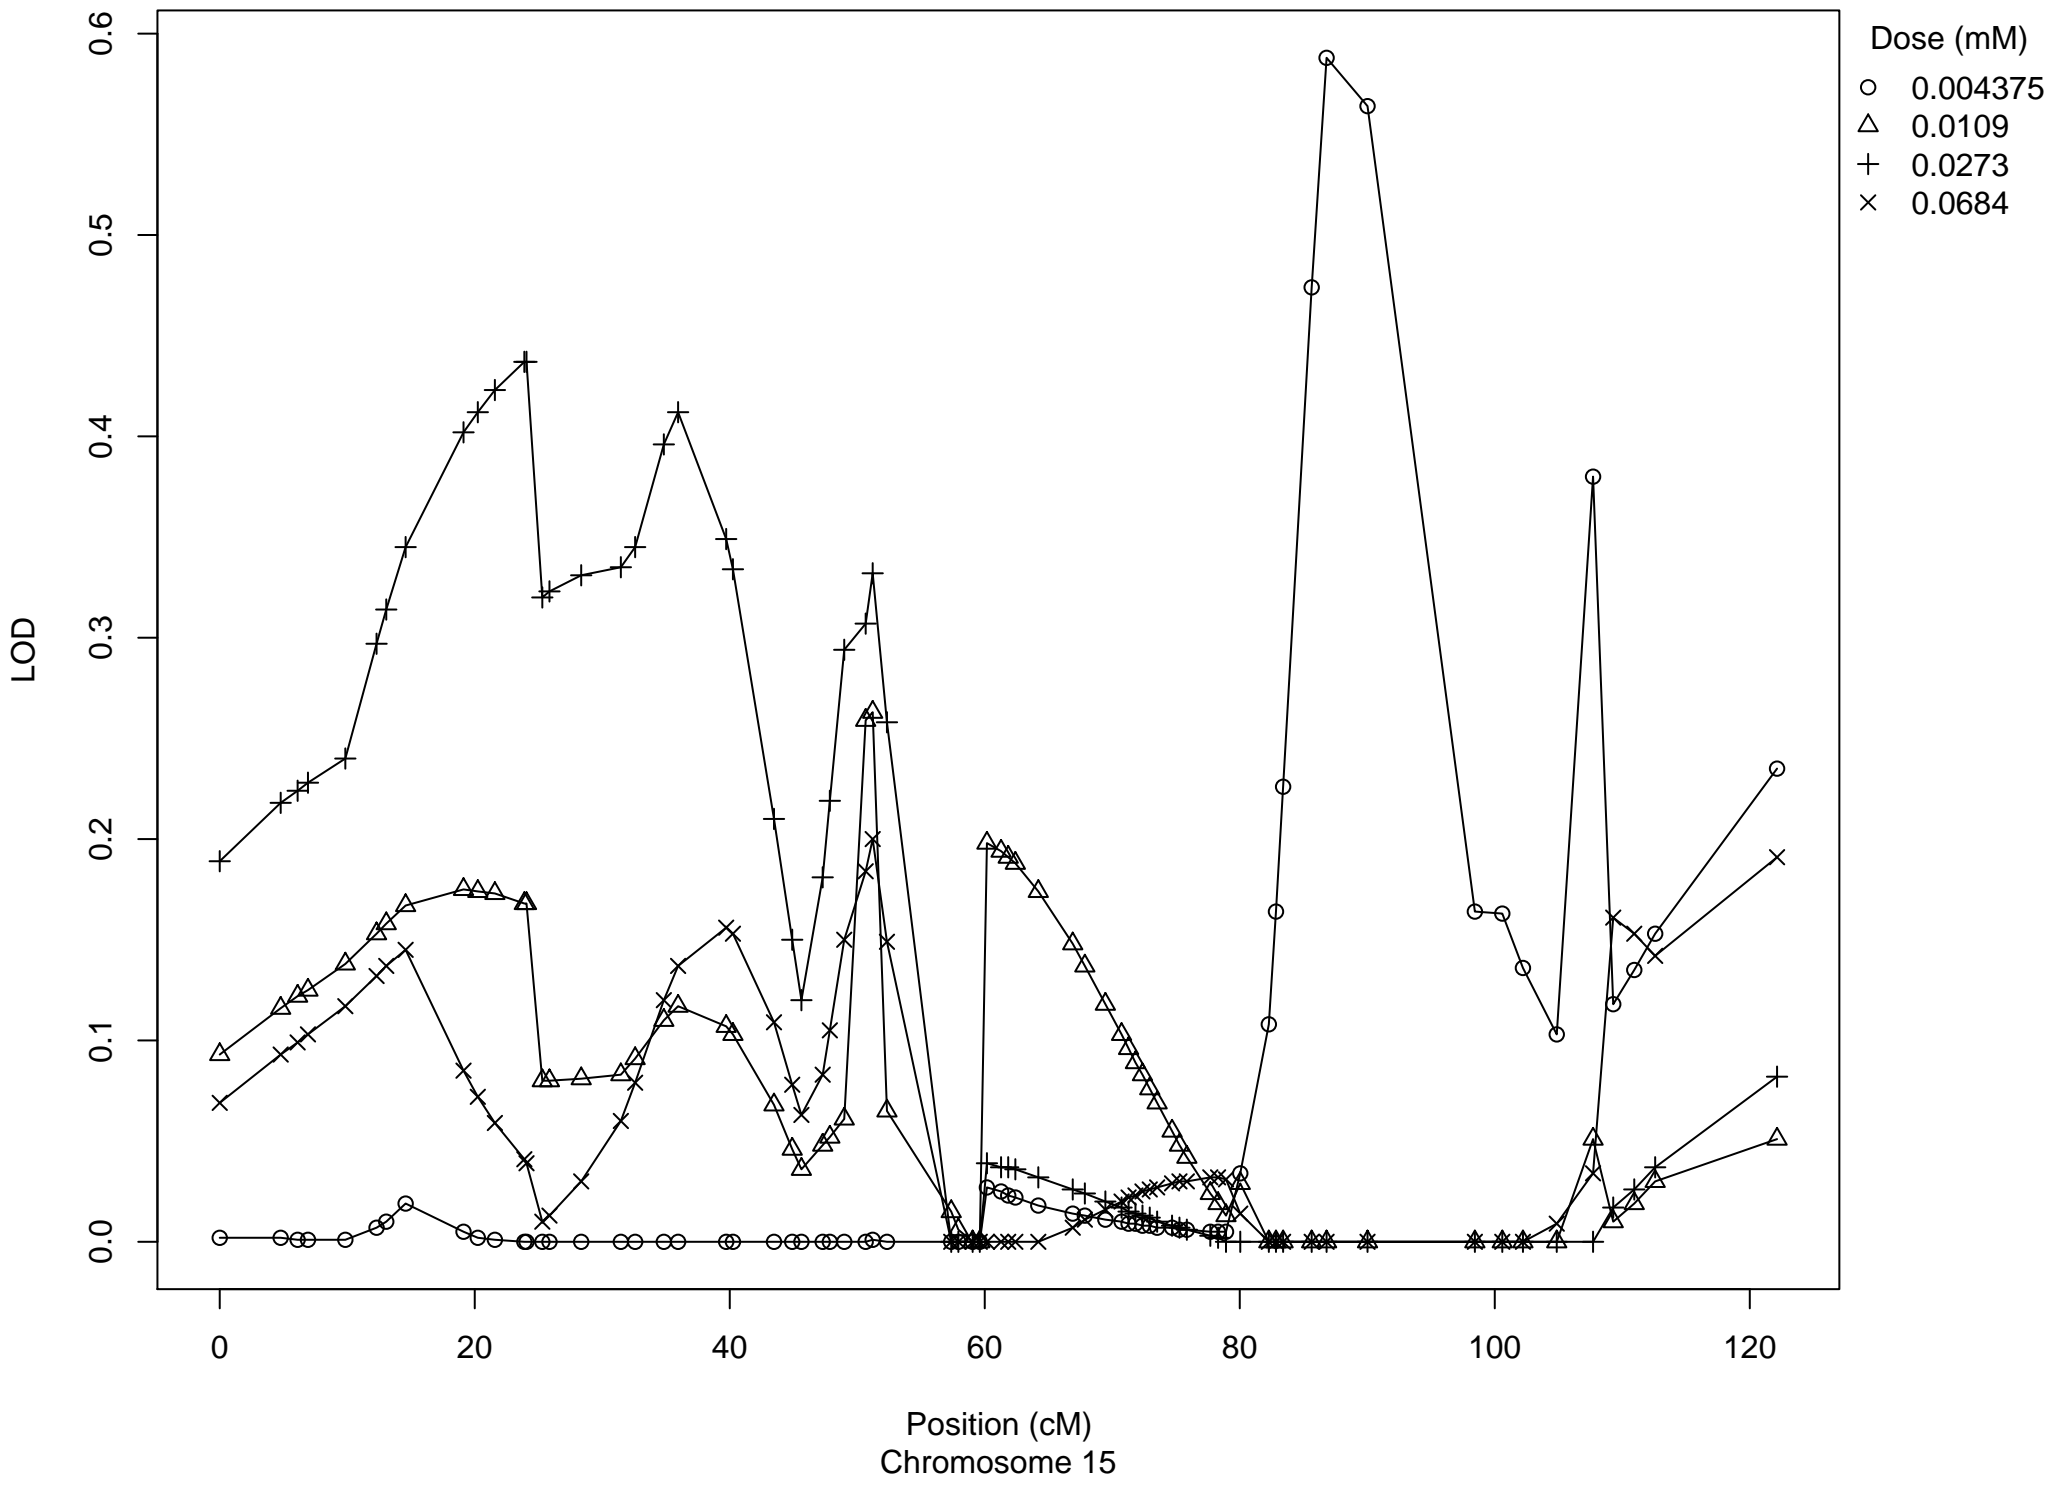

# 5-azacytidine (Aza)

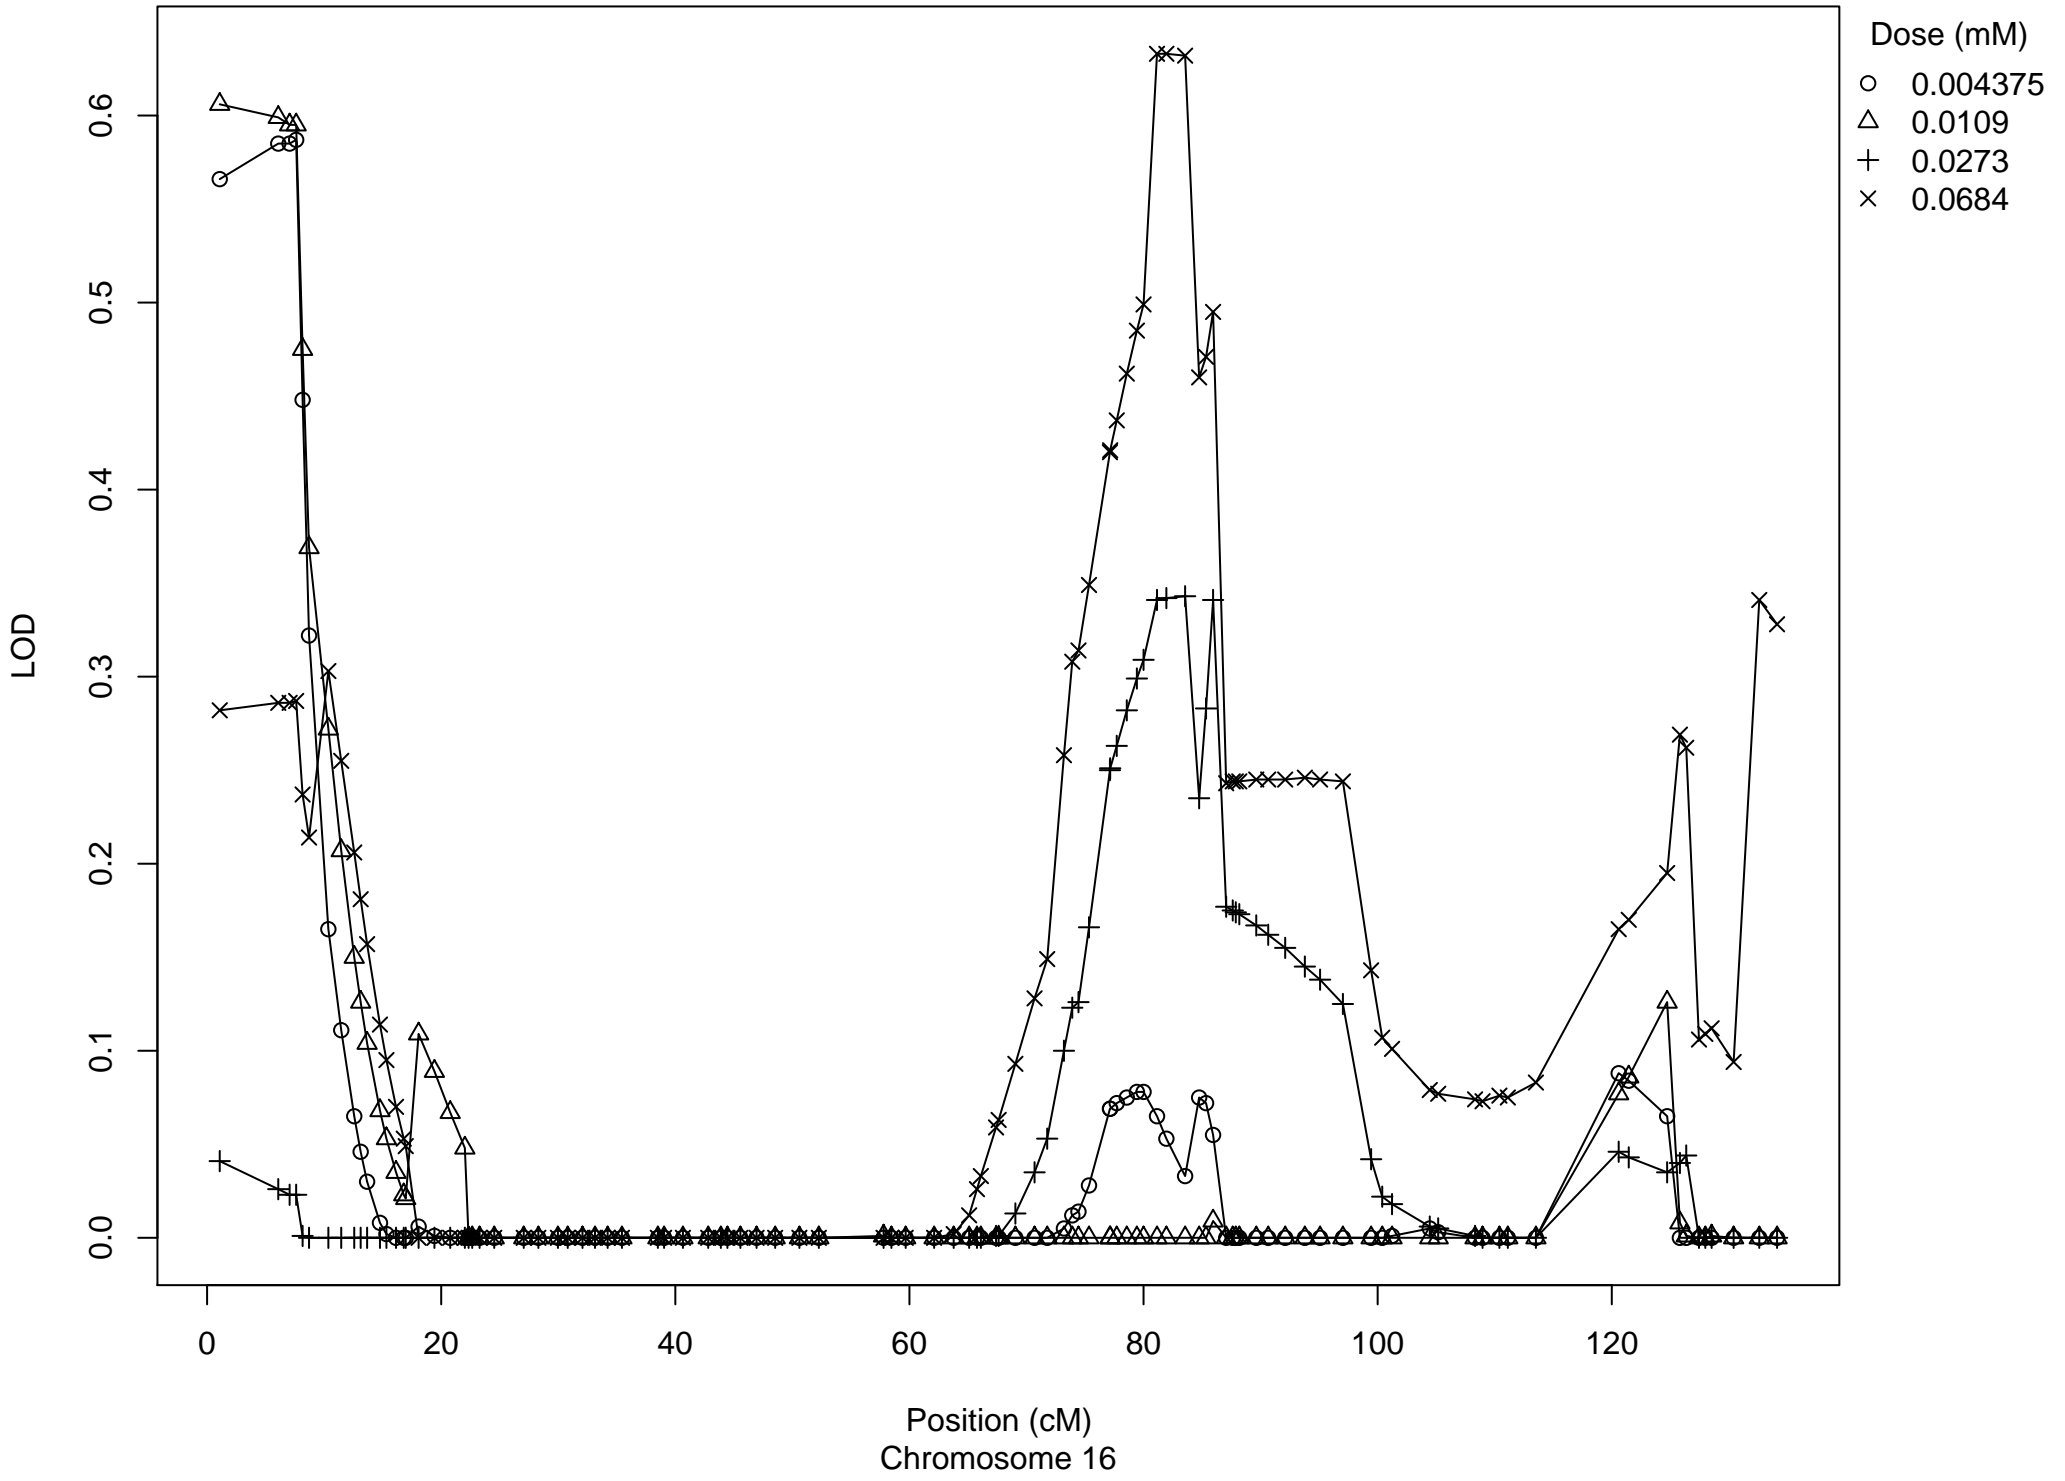

# 5-azacytidine (Aza)

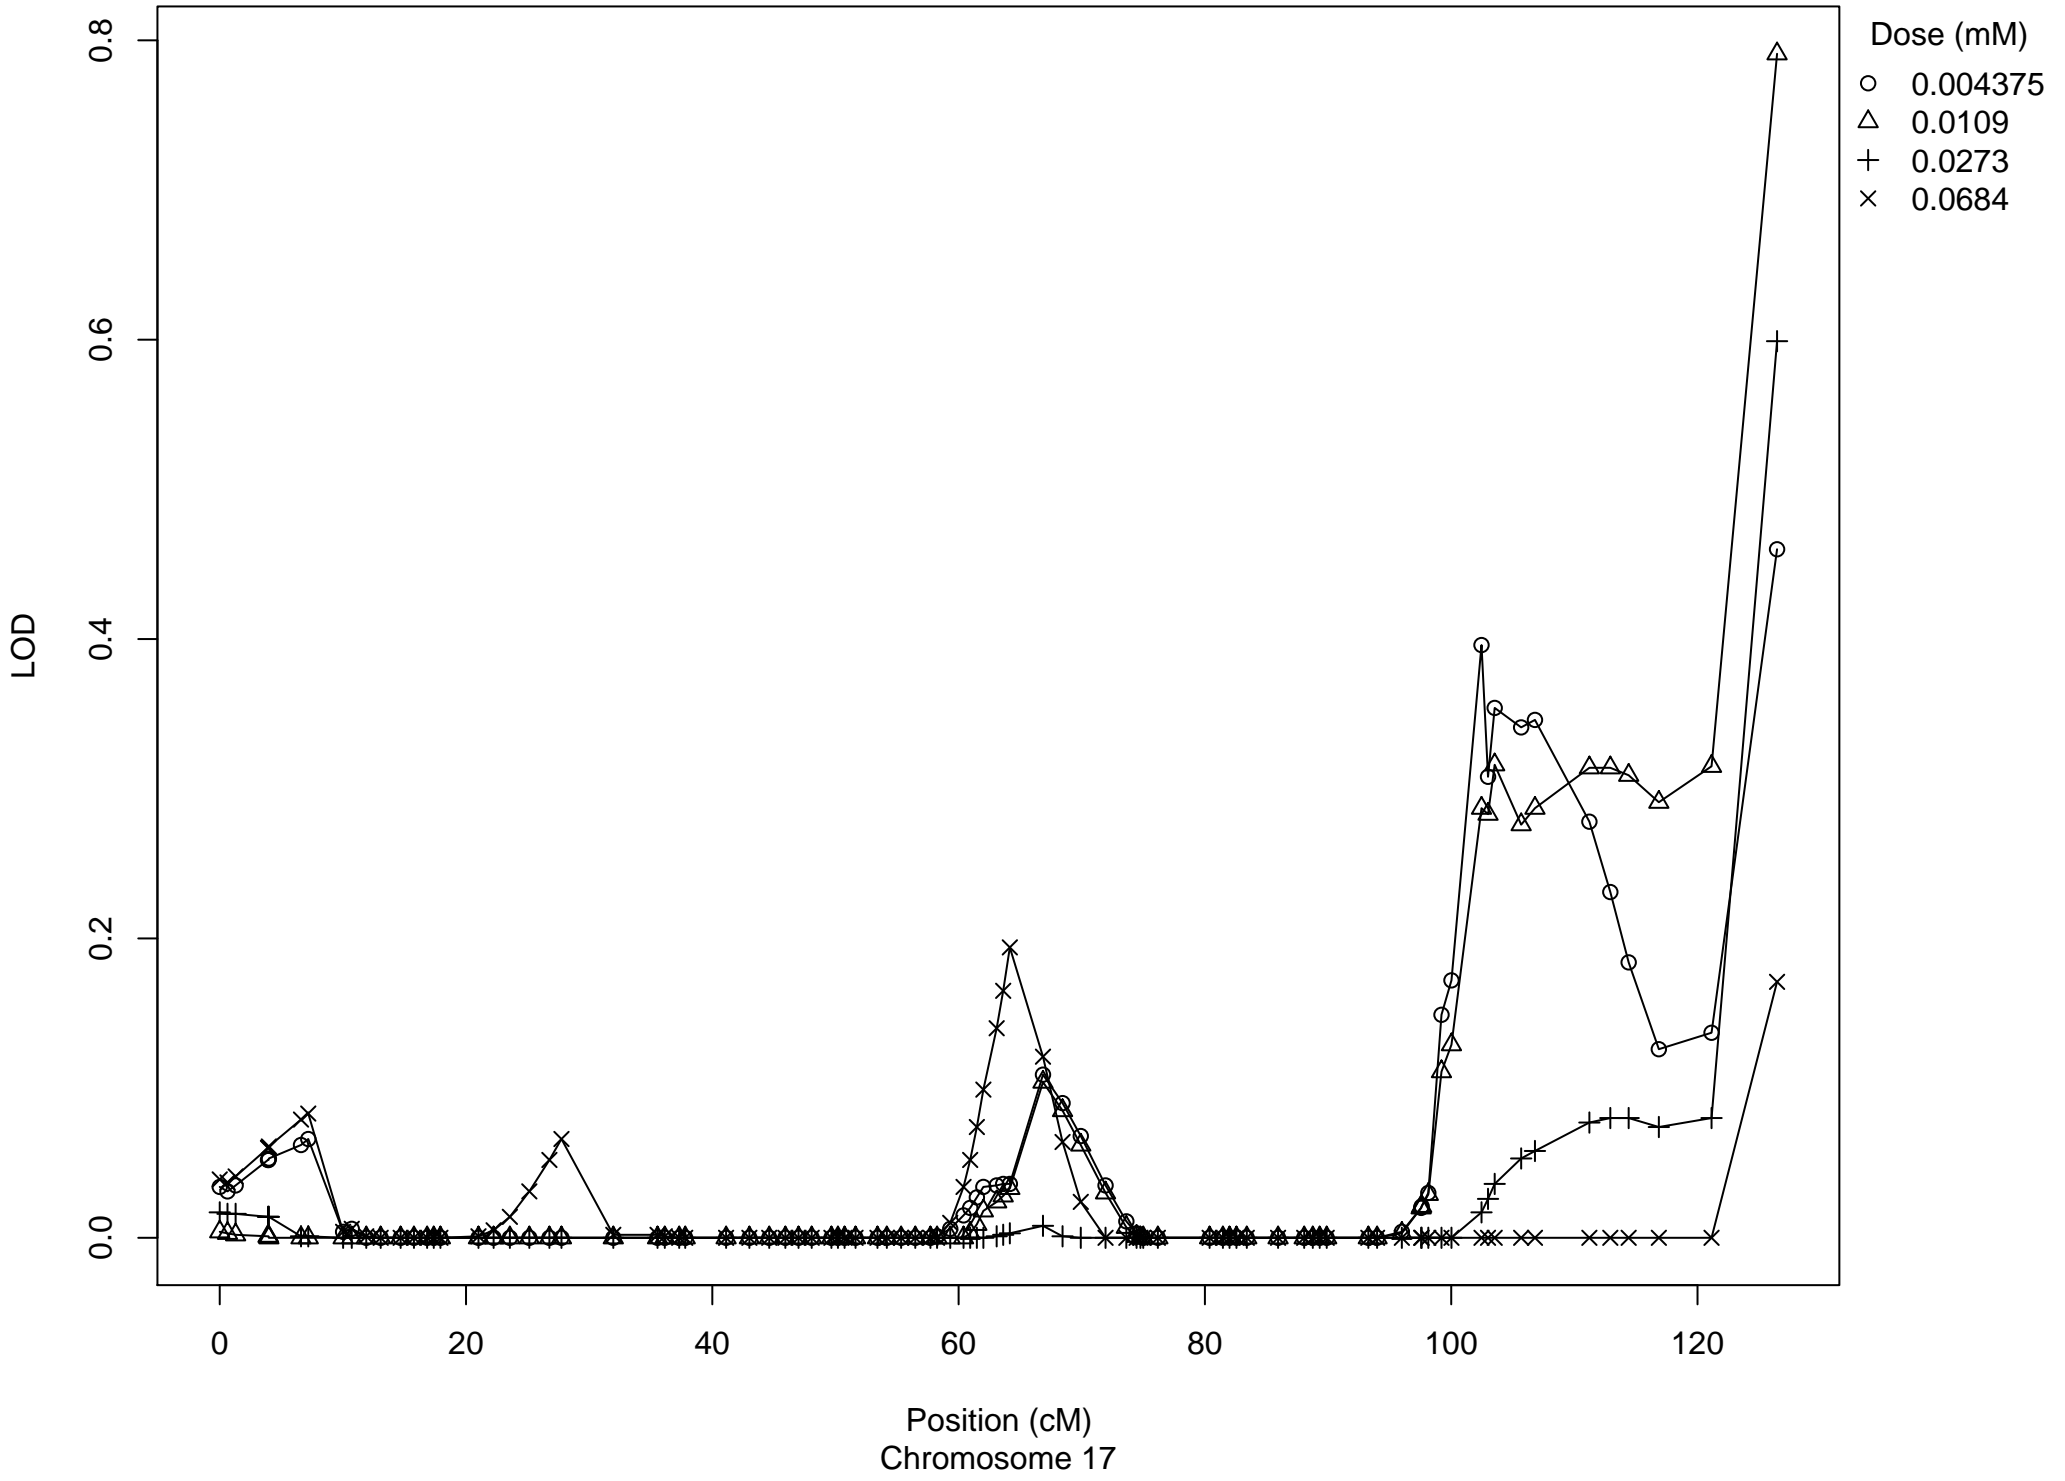

# 5-azacytidine (Aza)

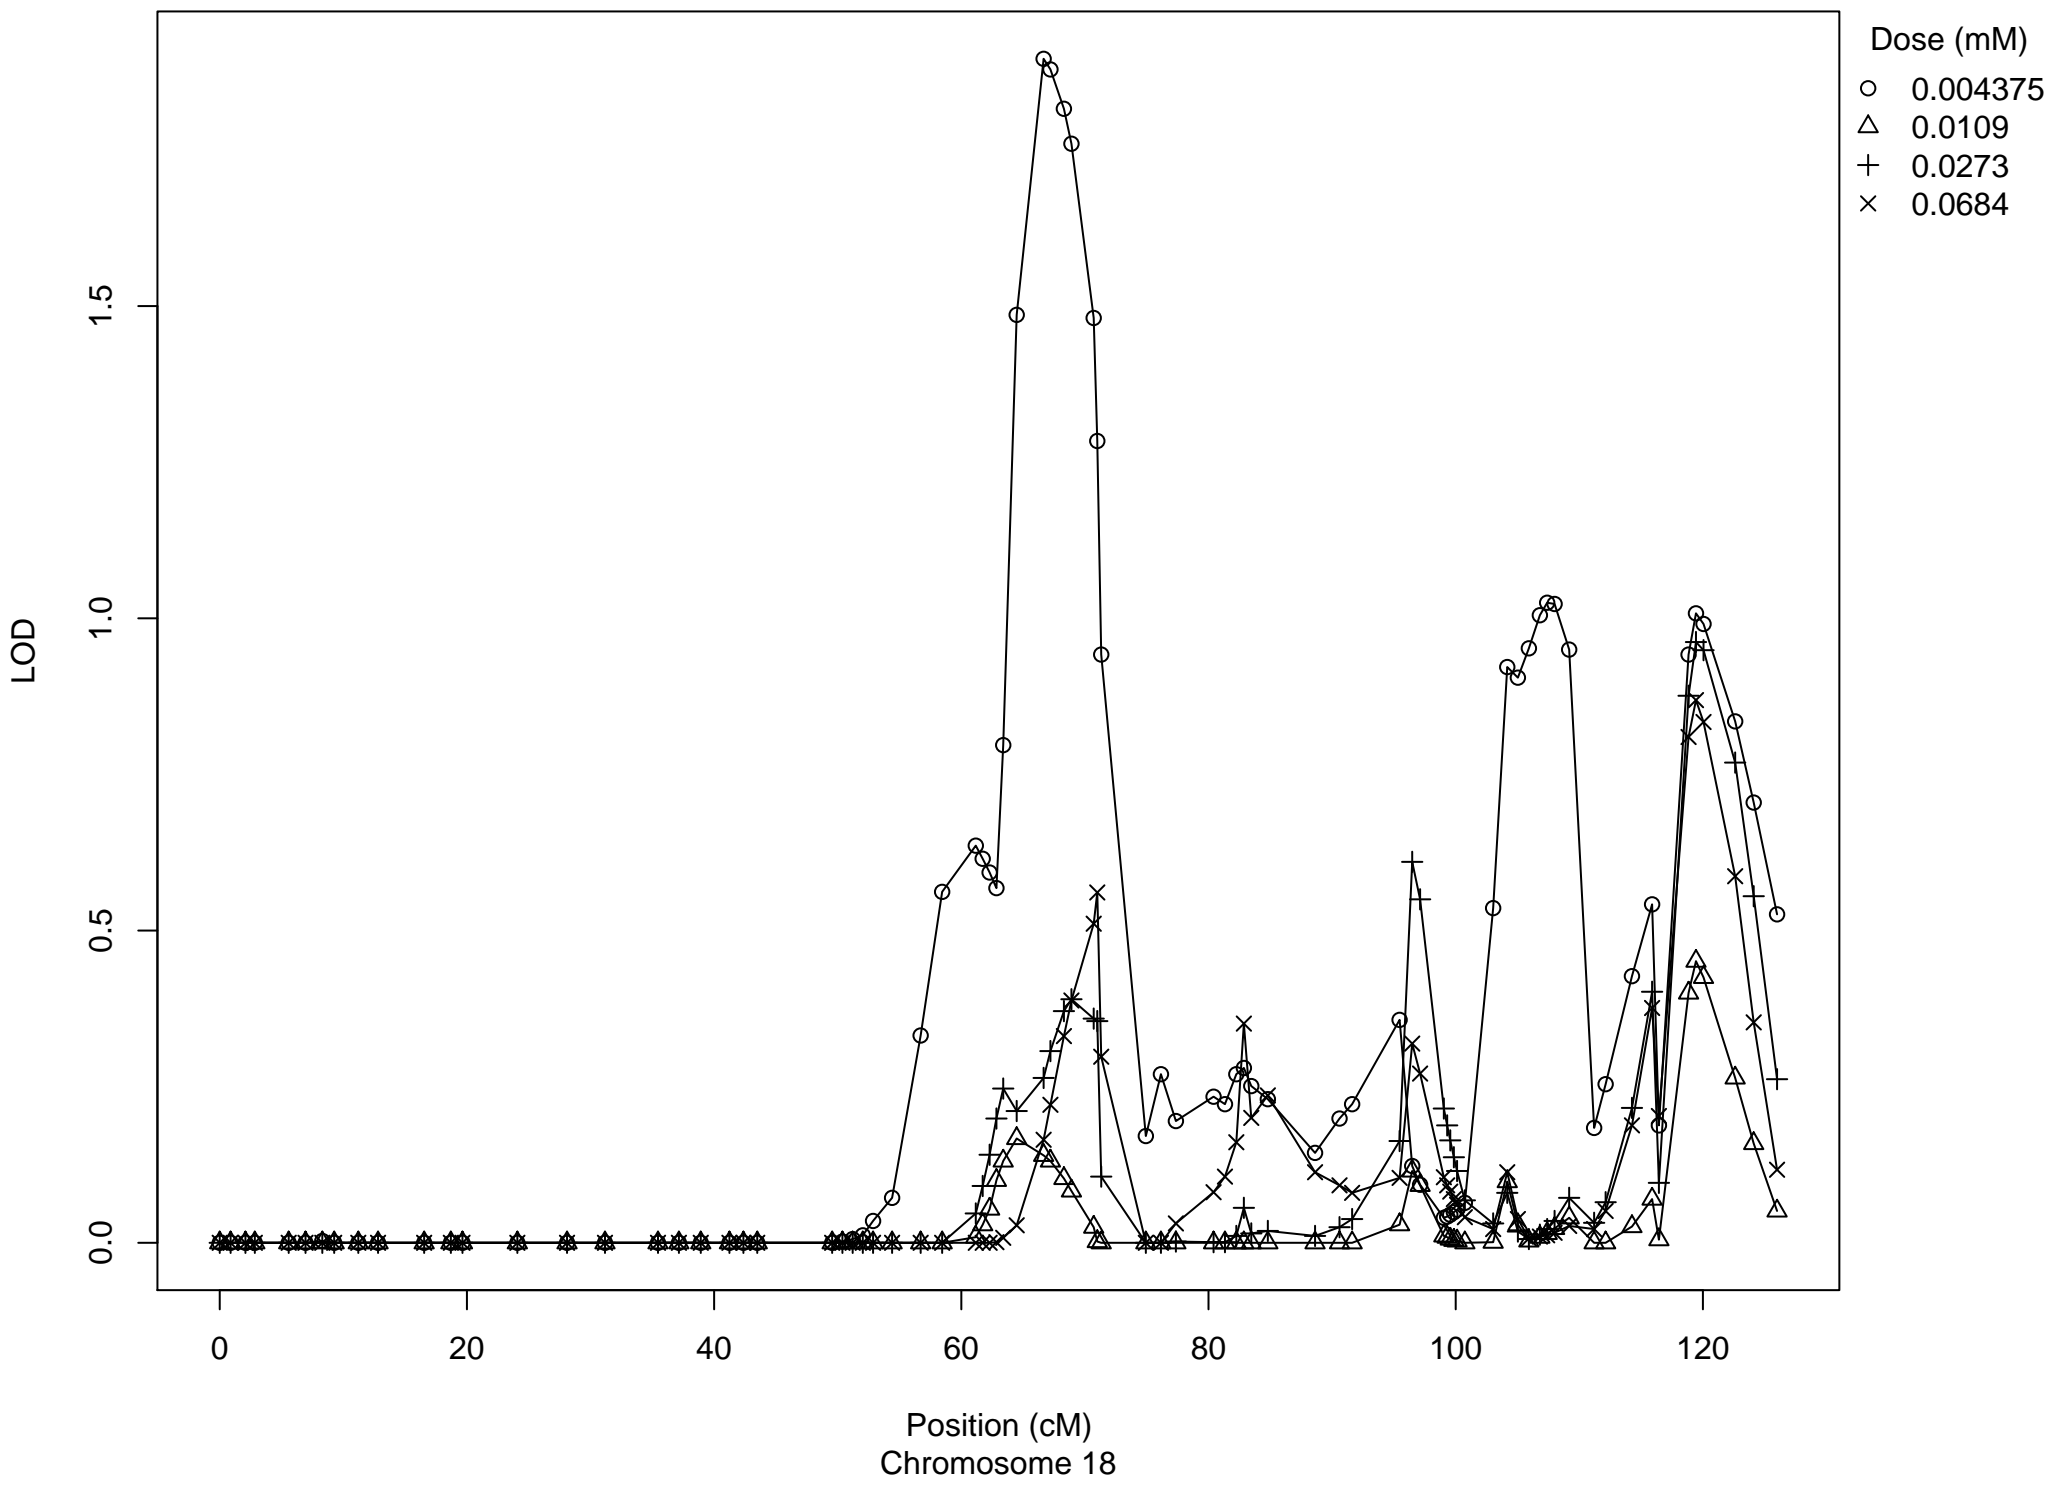

# 5-azacytidine (Aza)

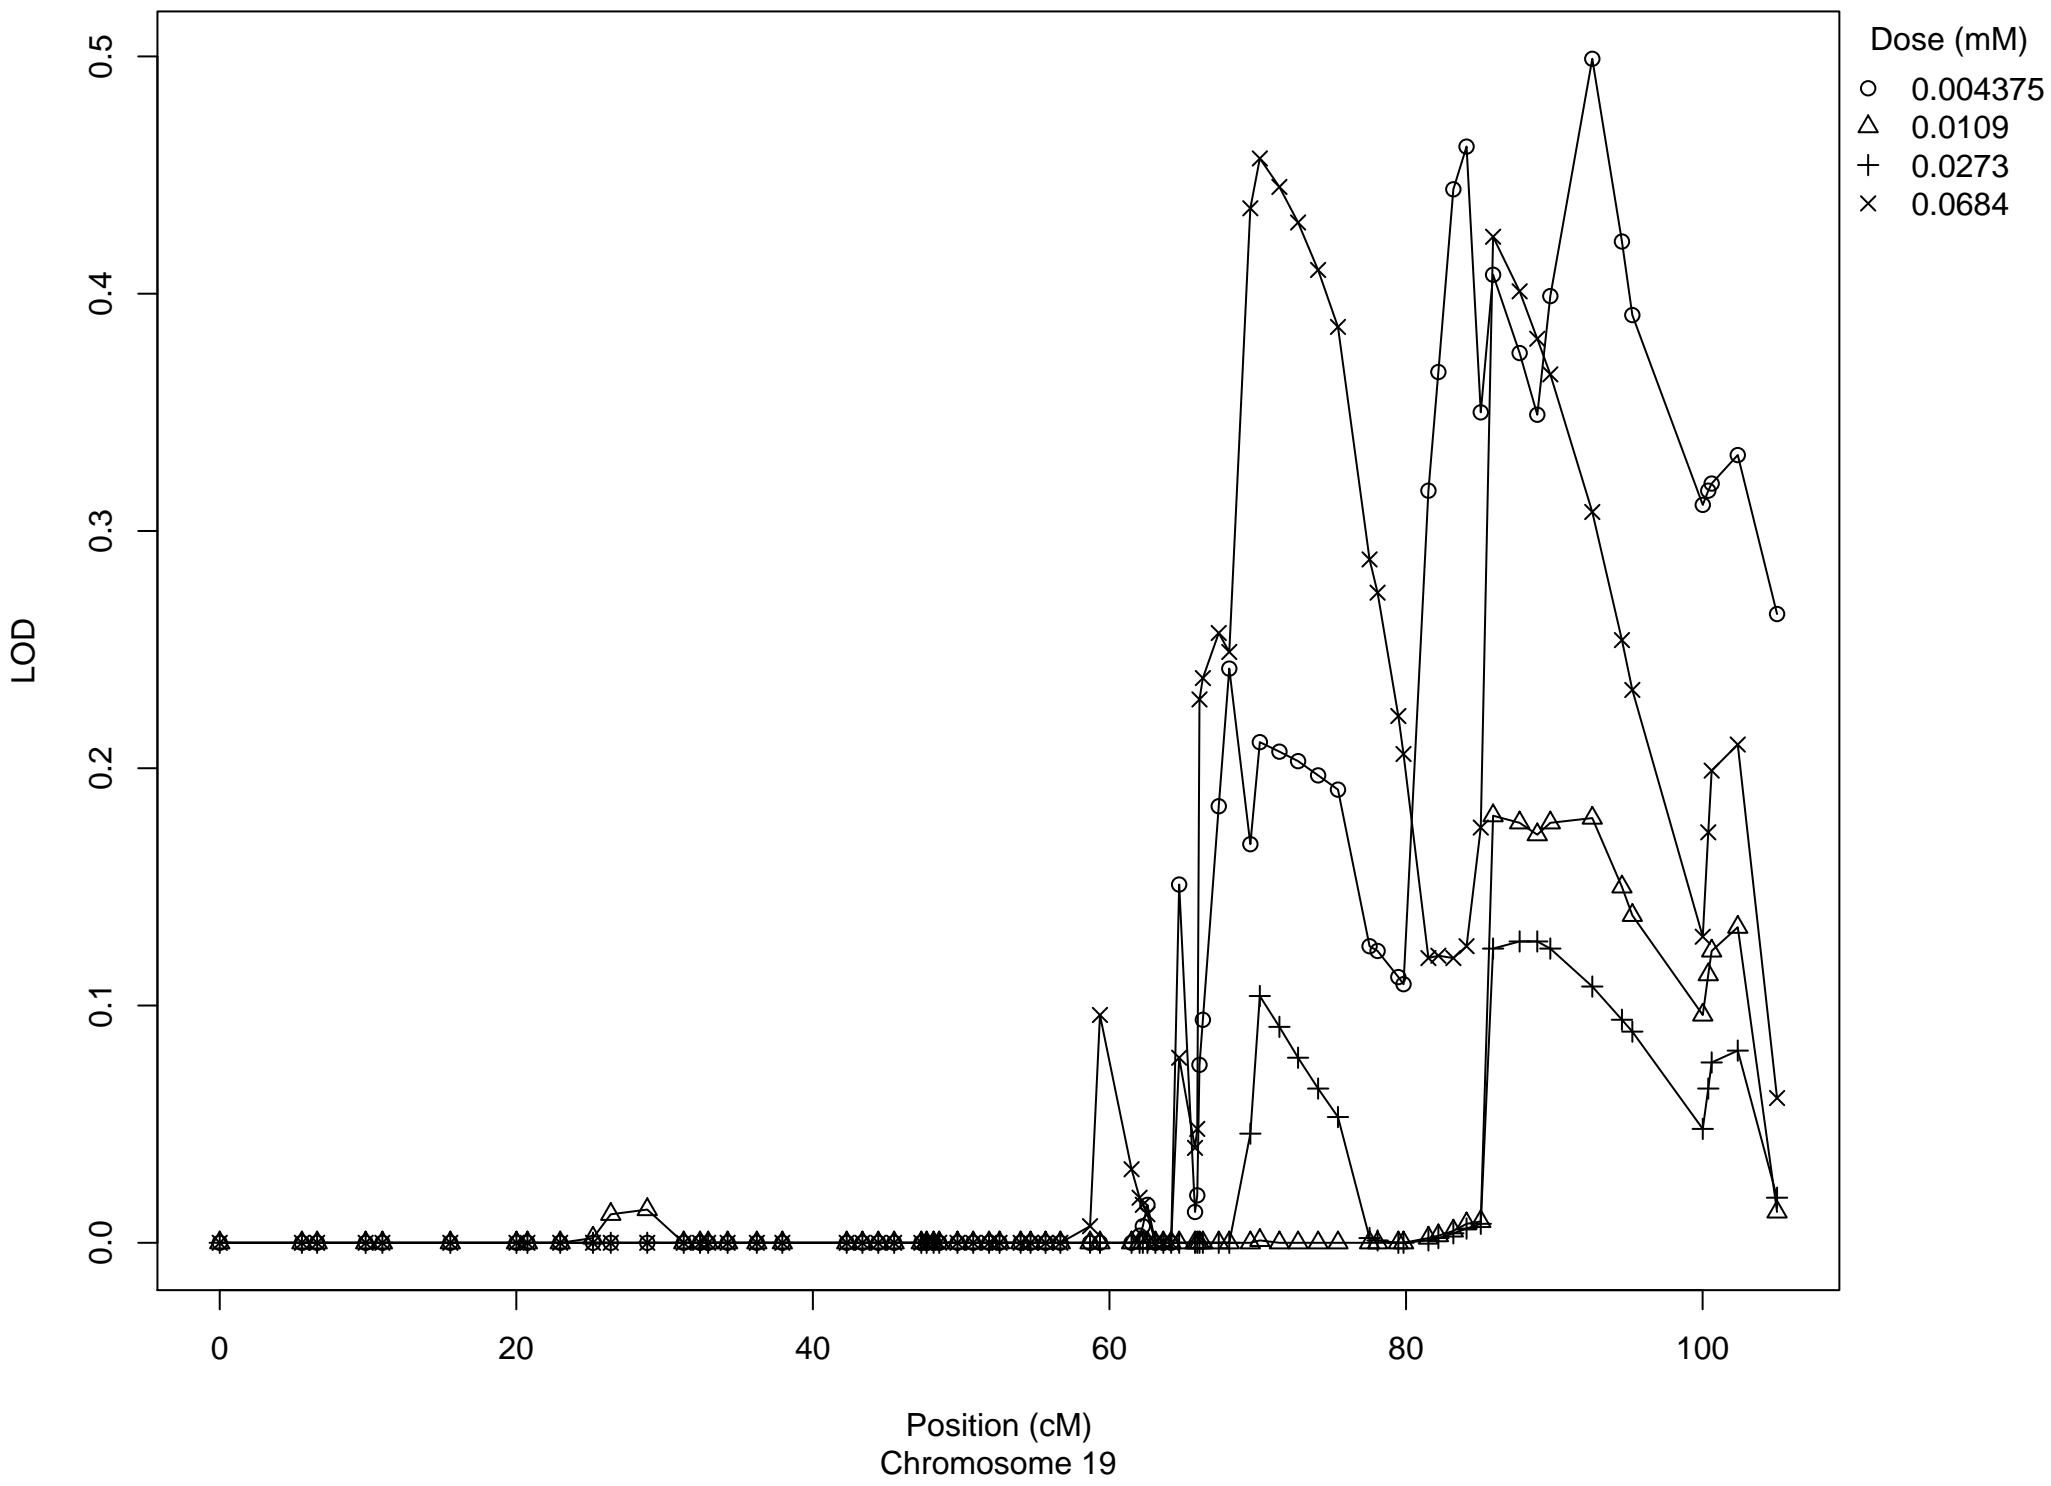

# 5-azacytidine (Aza)

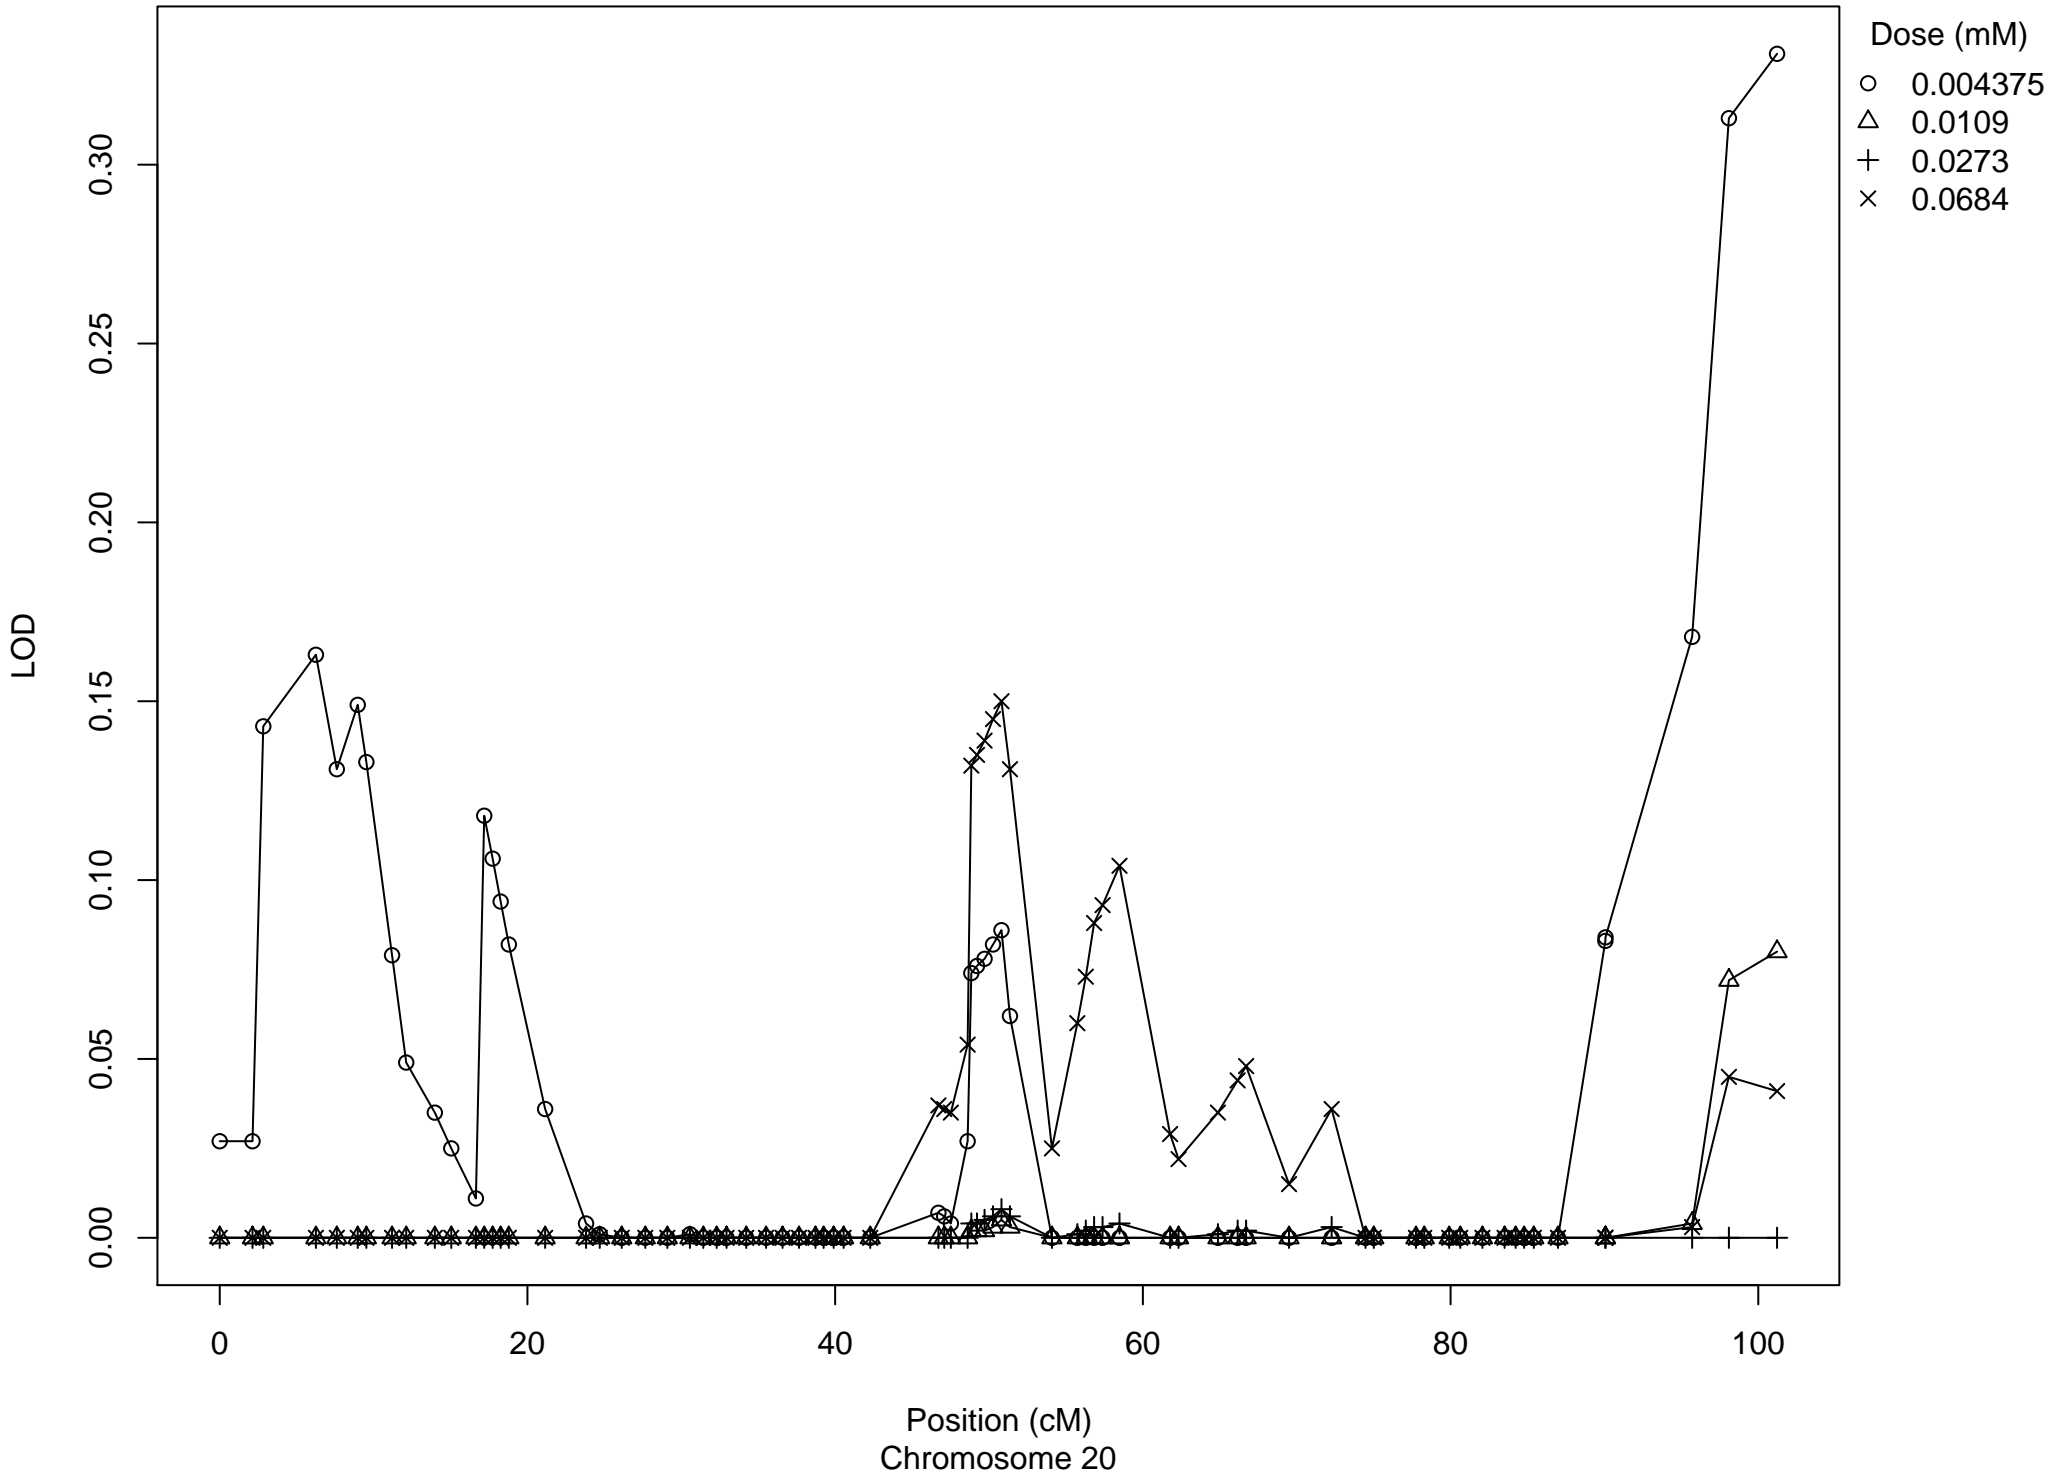



# 5-azacytidine (Aza)

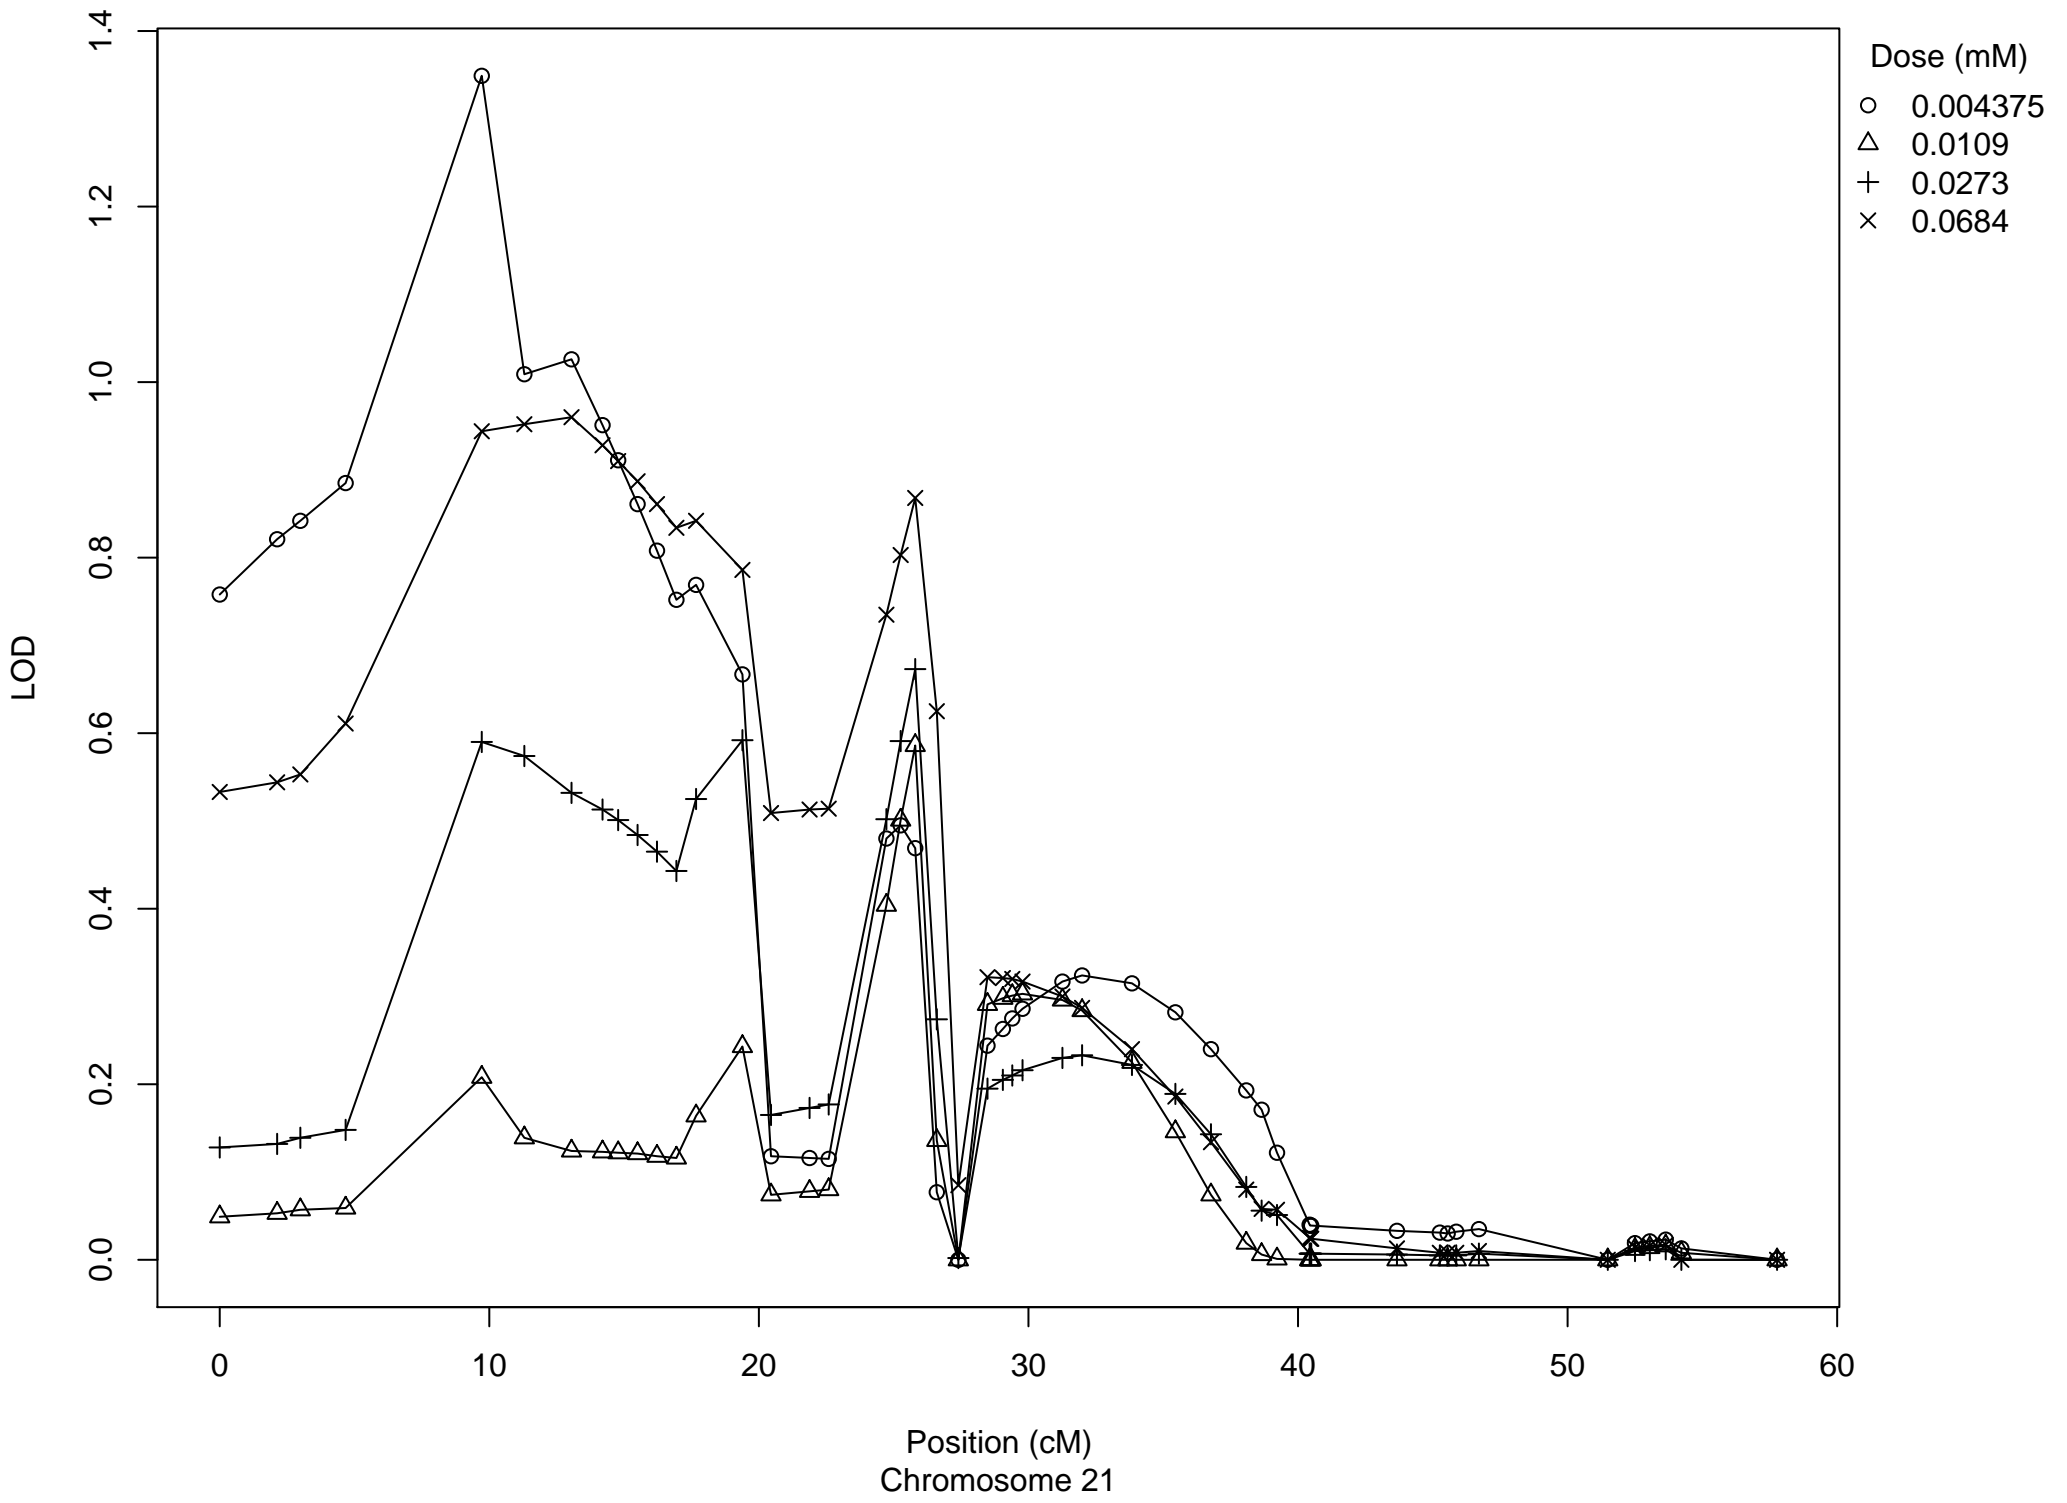

# 5-azacytidine (Aza)

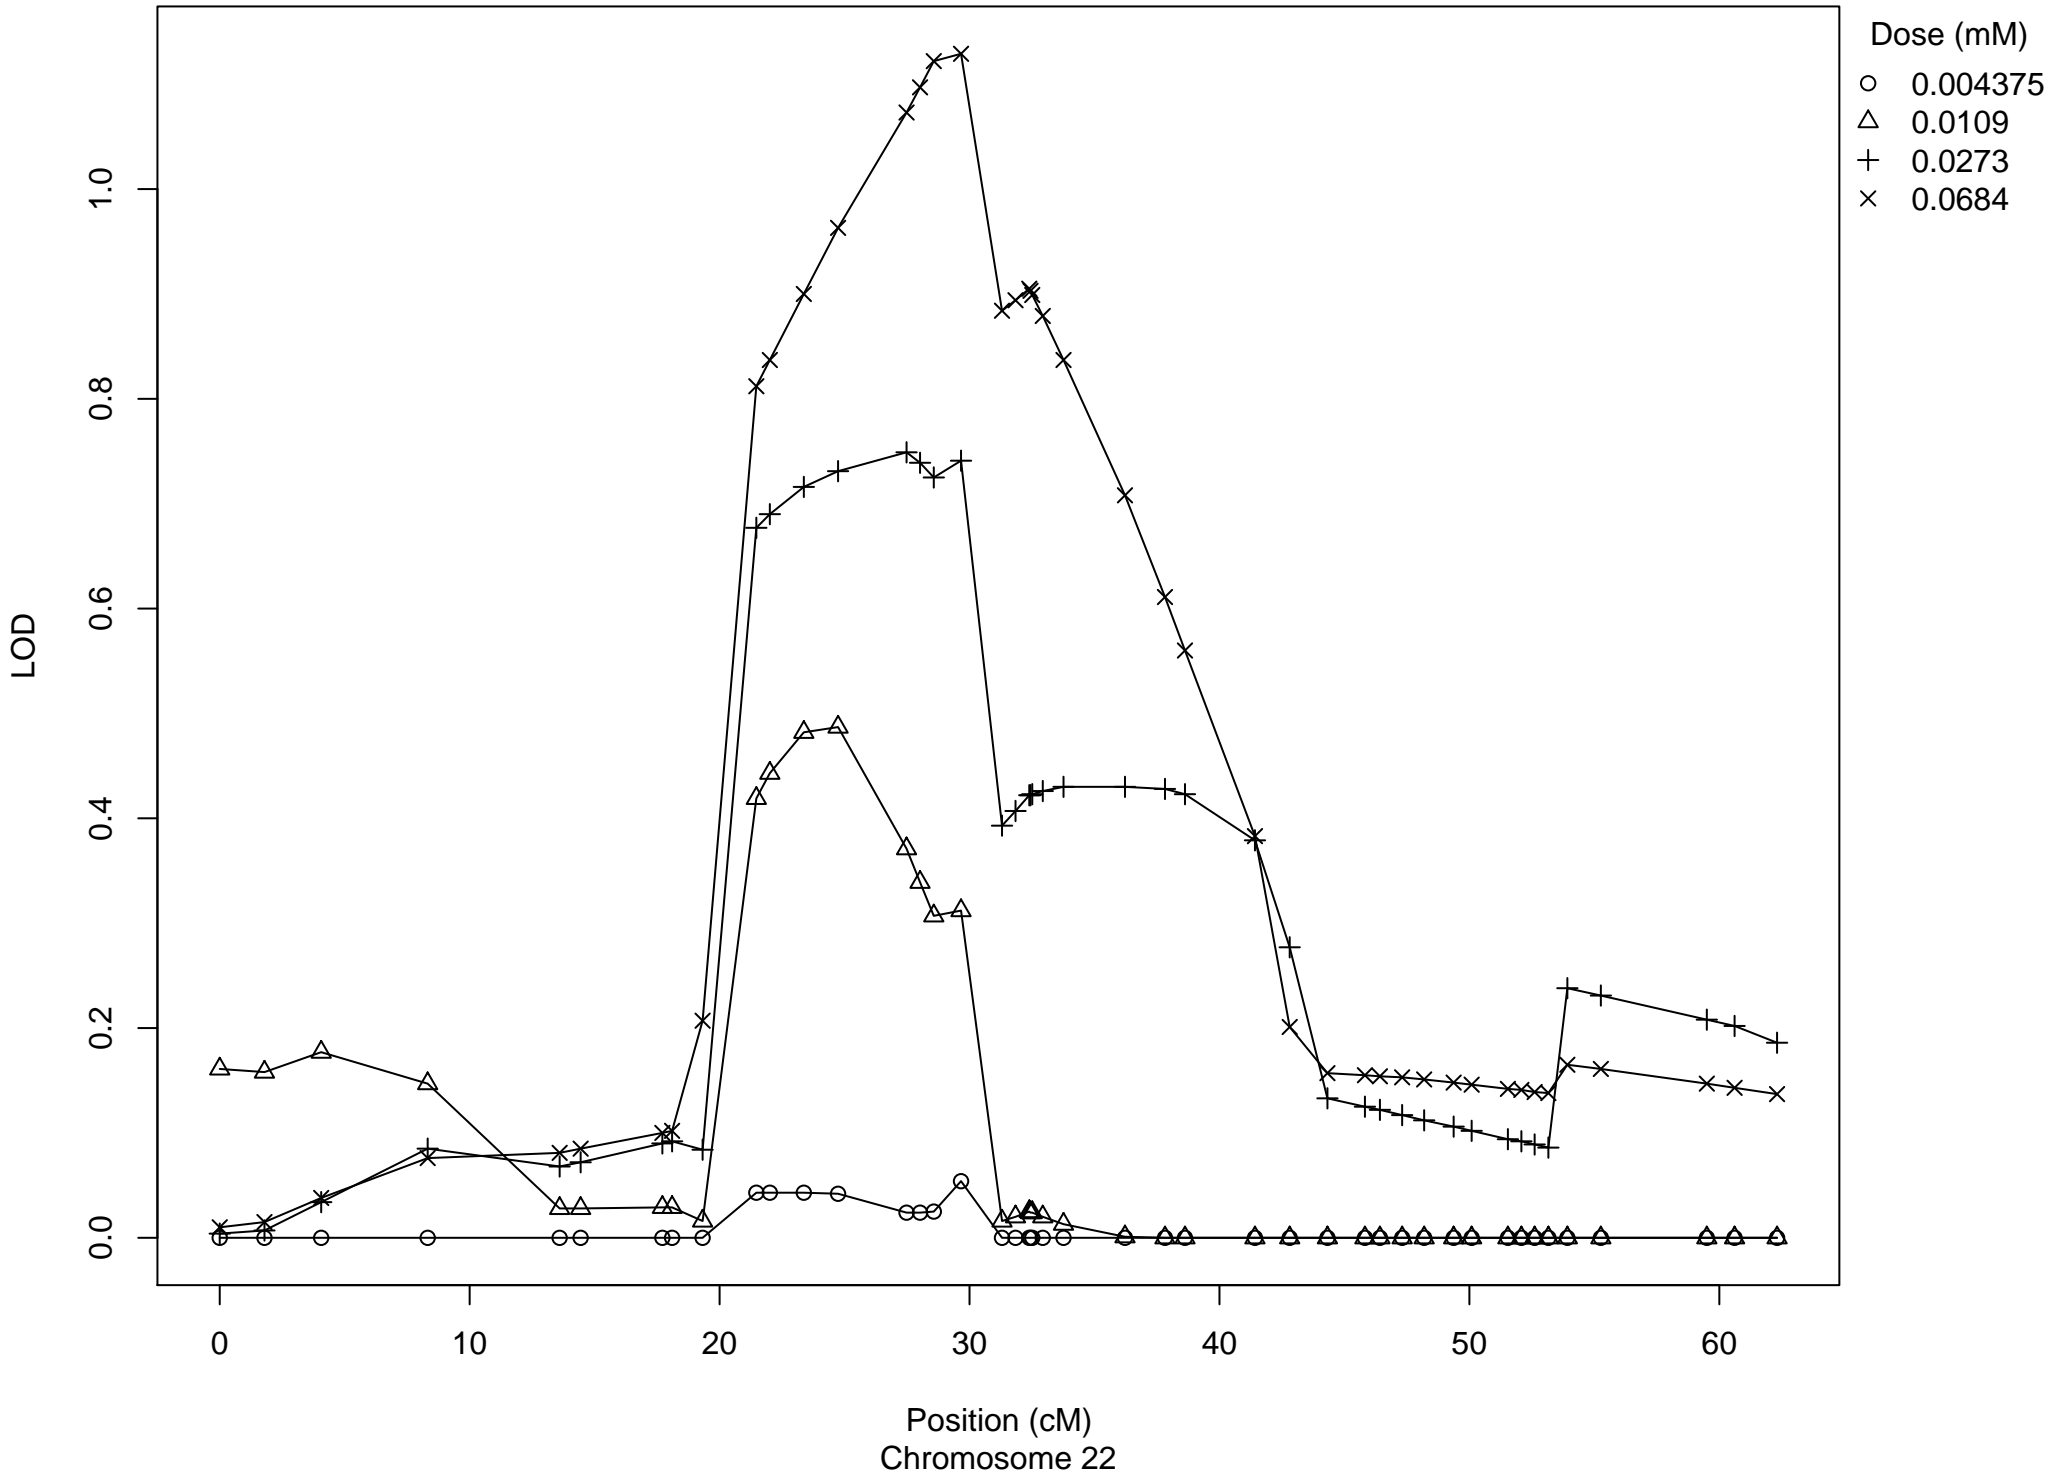

# 5-Fluoro-2-deoxyuridine (Flox)

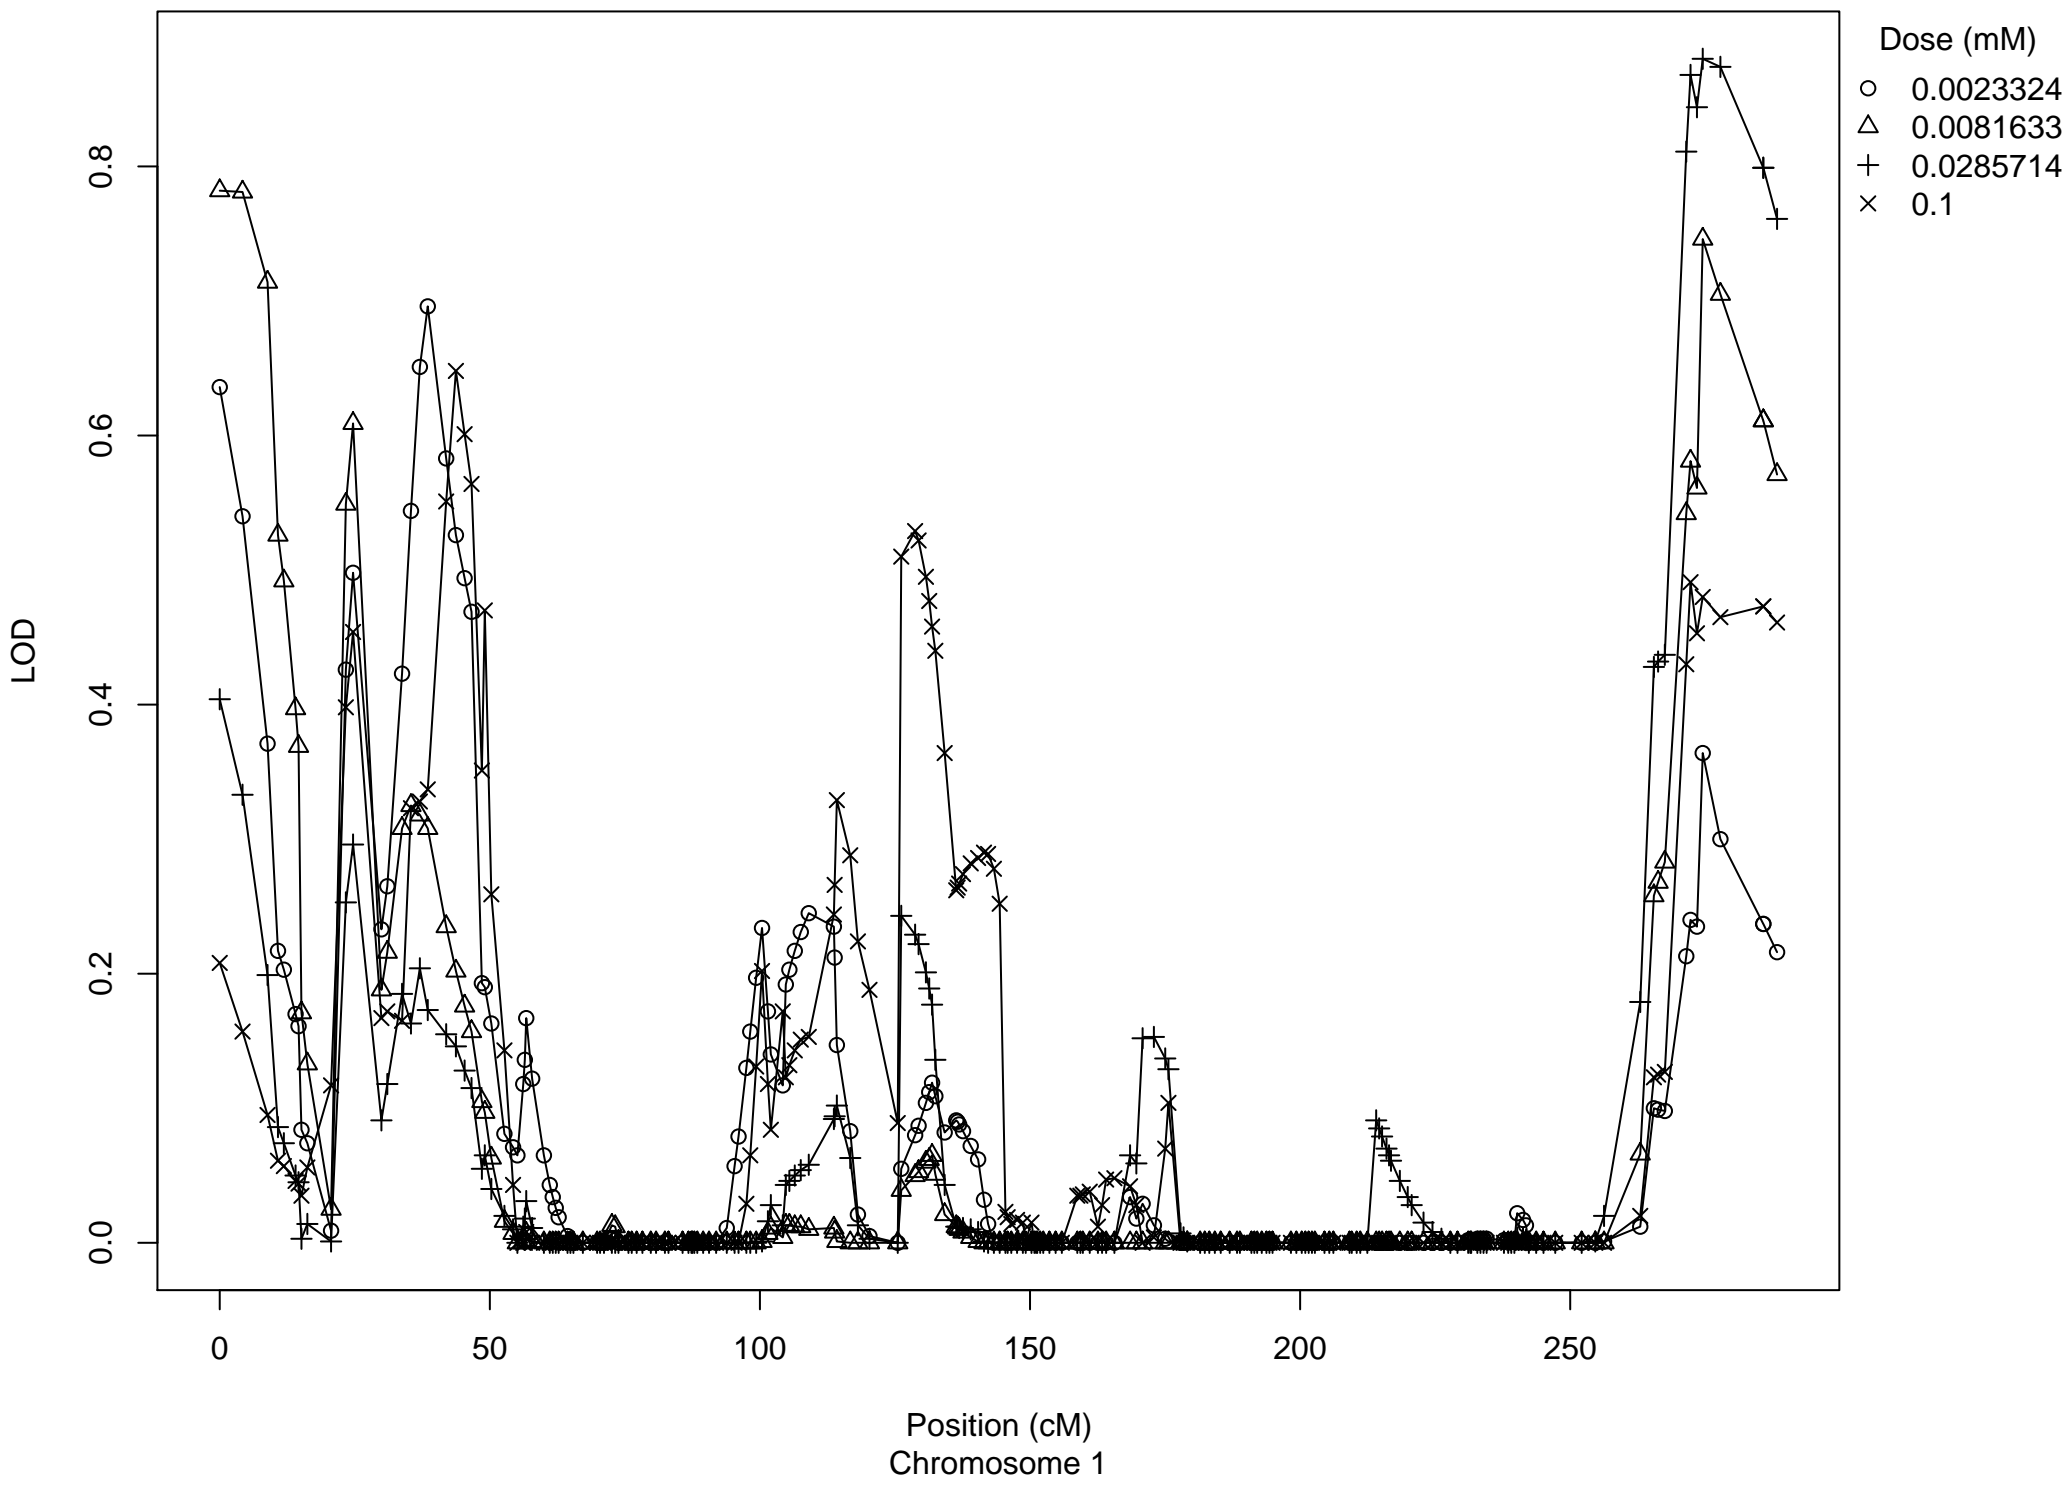

# 5-Fluoro-2-deoxyuridine (Flox)

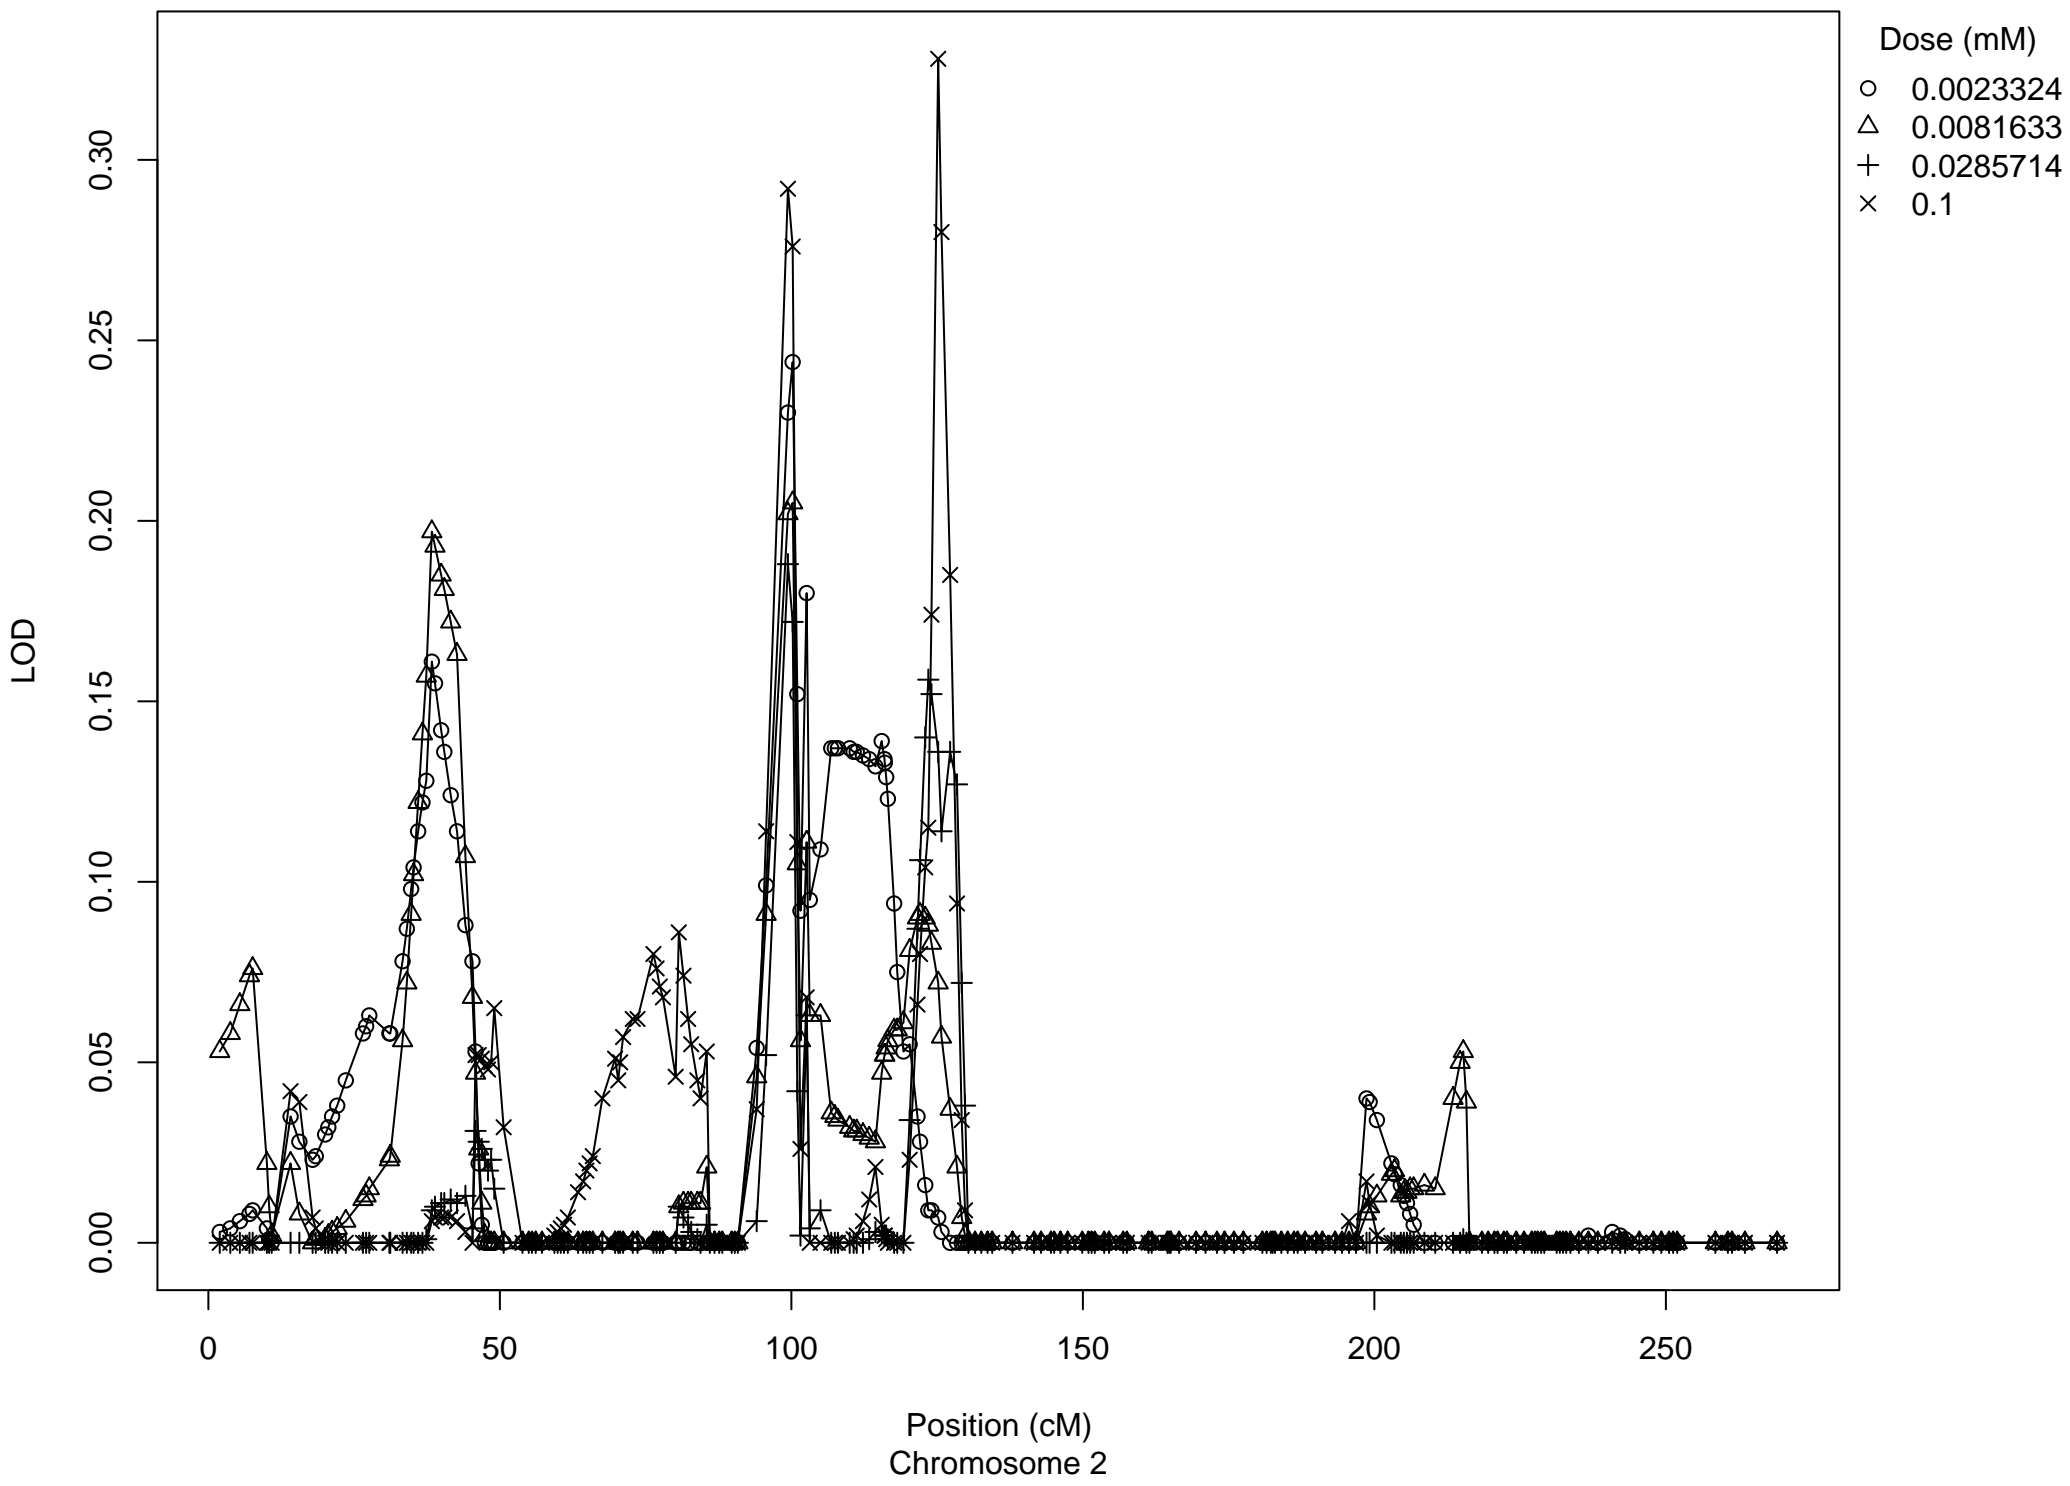

# 5-Fluoro-2-deoxyuridine (Flox)

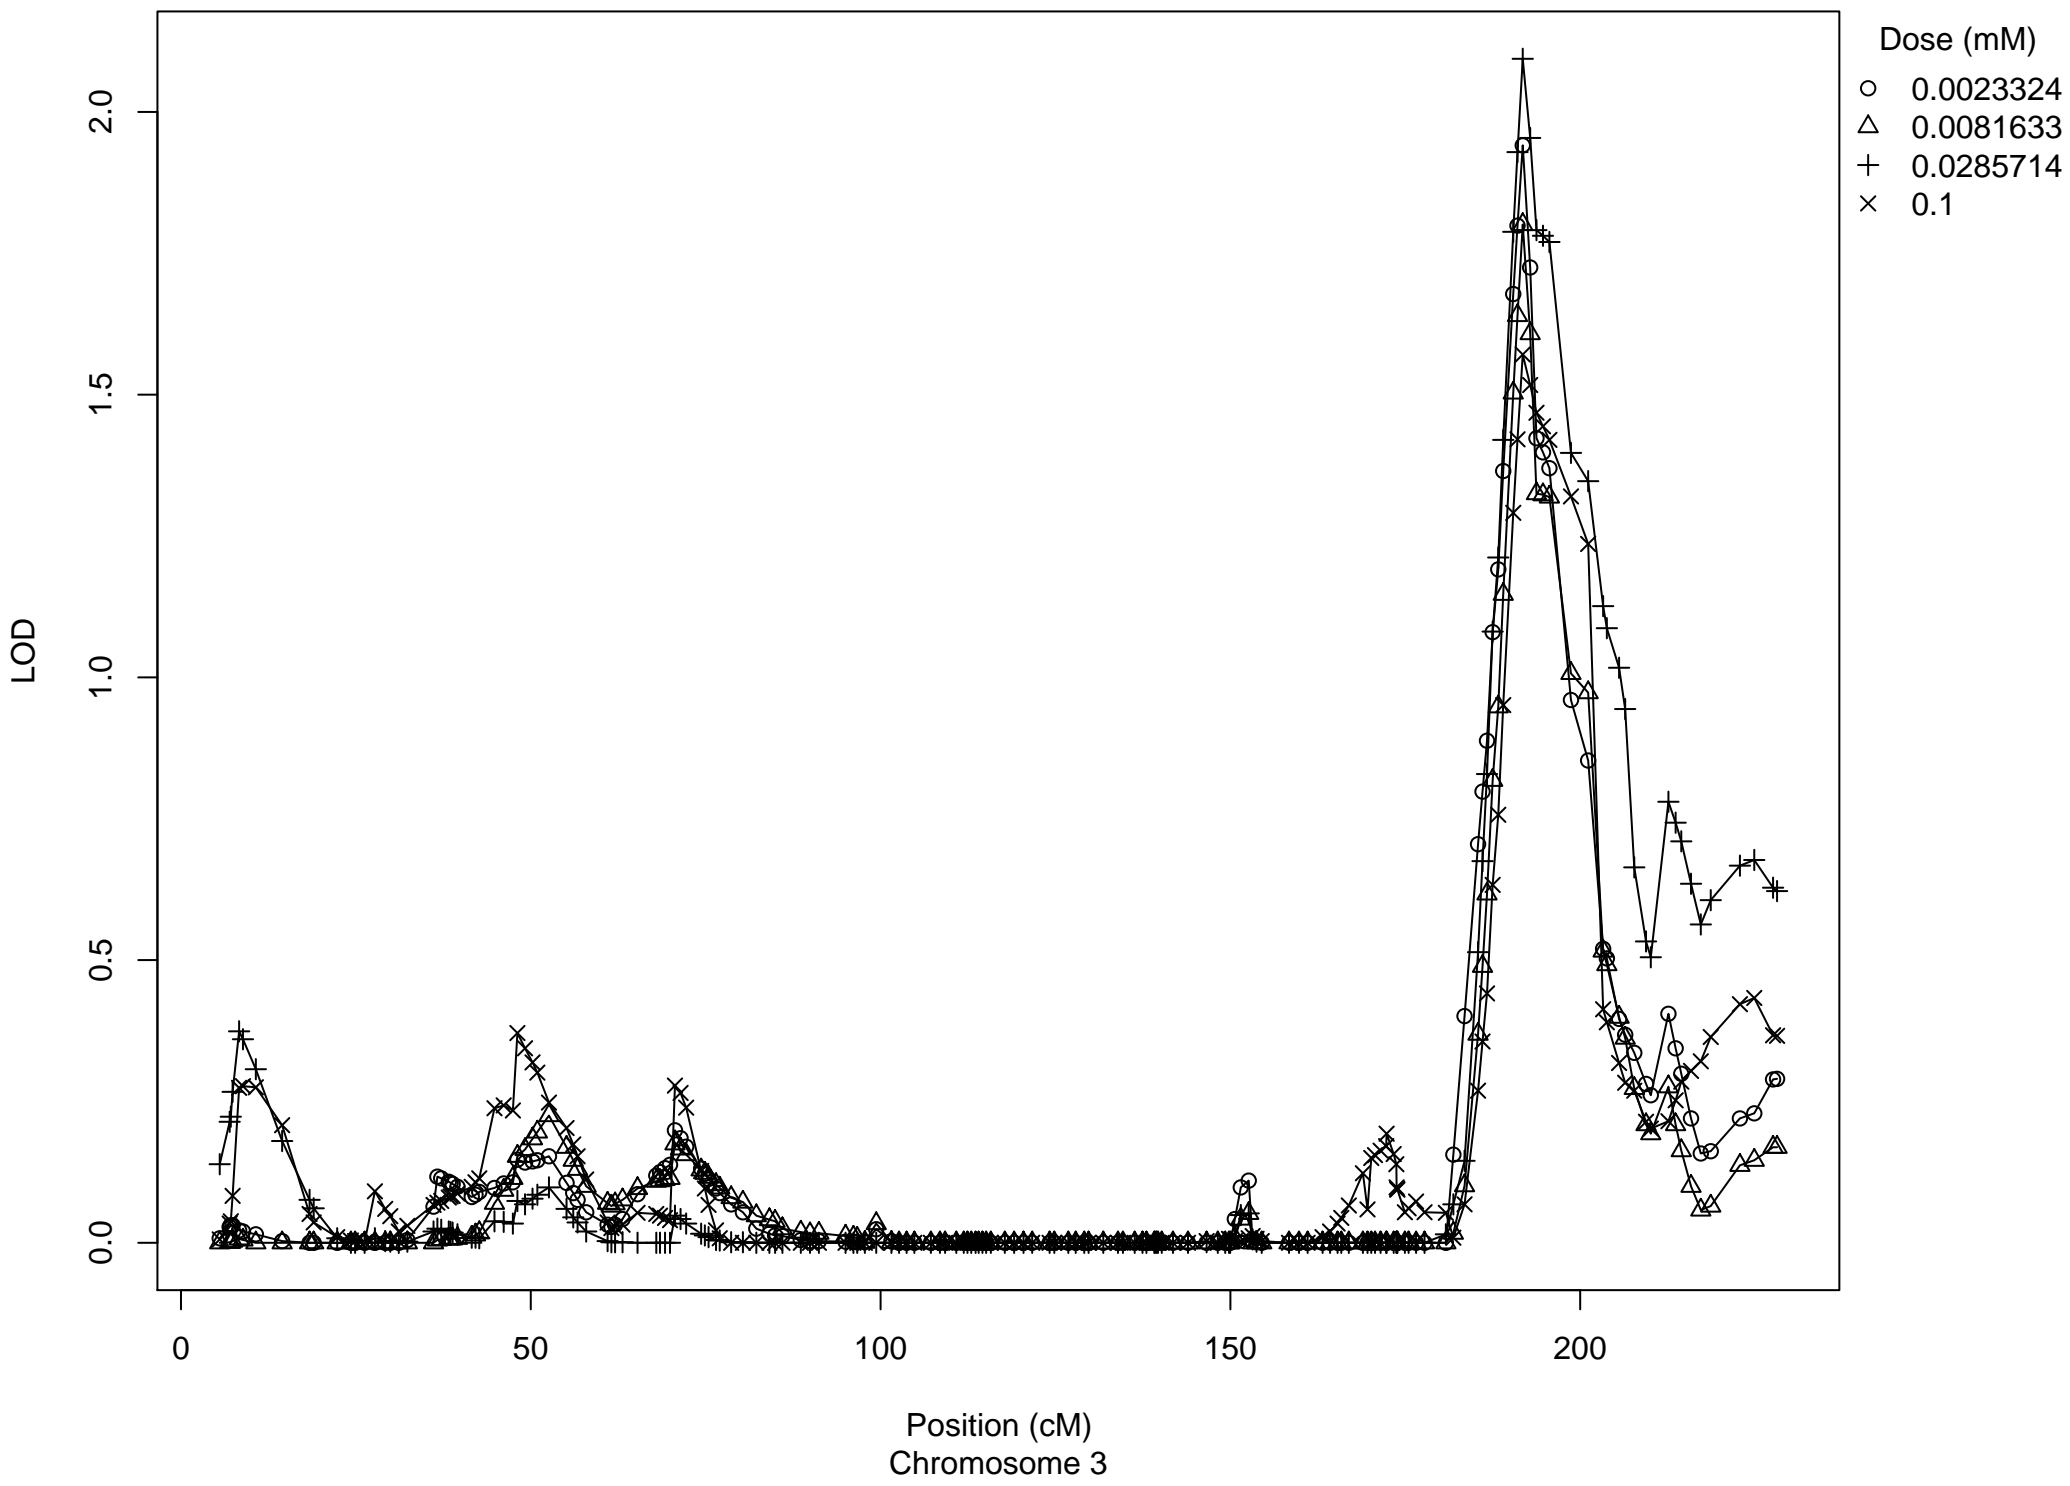

# 5-Fluoro-2-deoxyuridine (Flox)

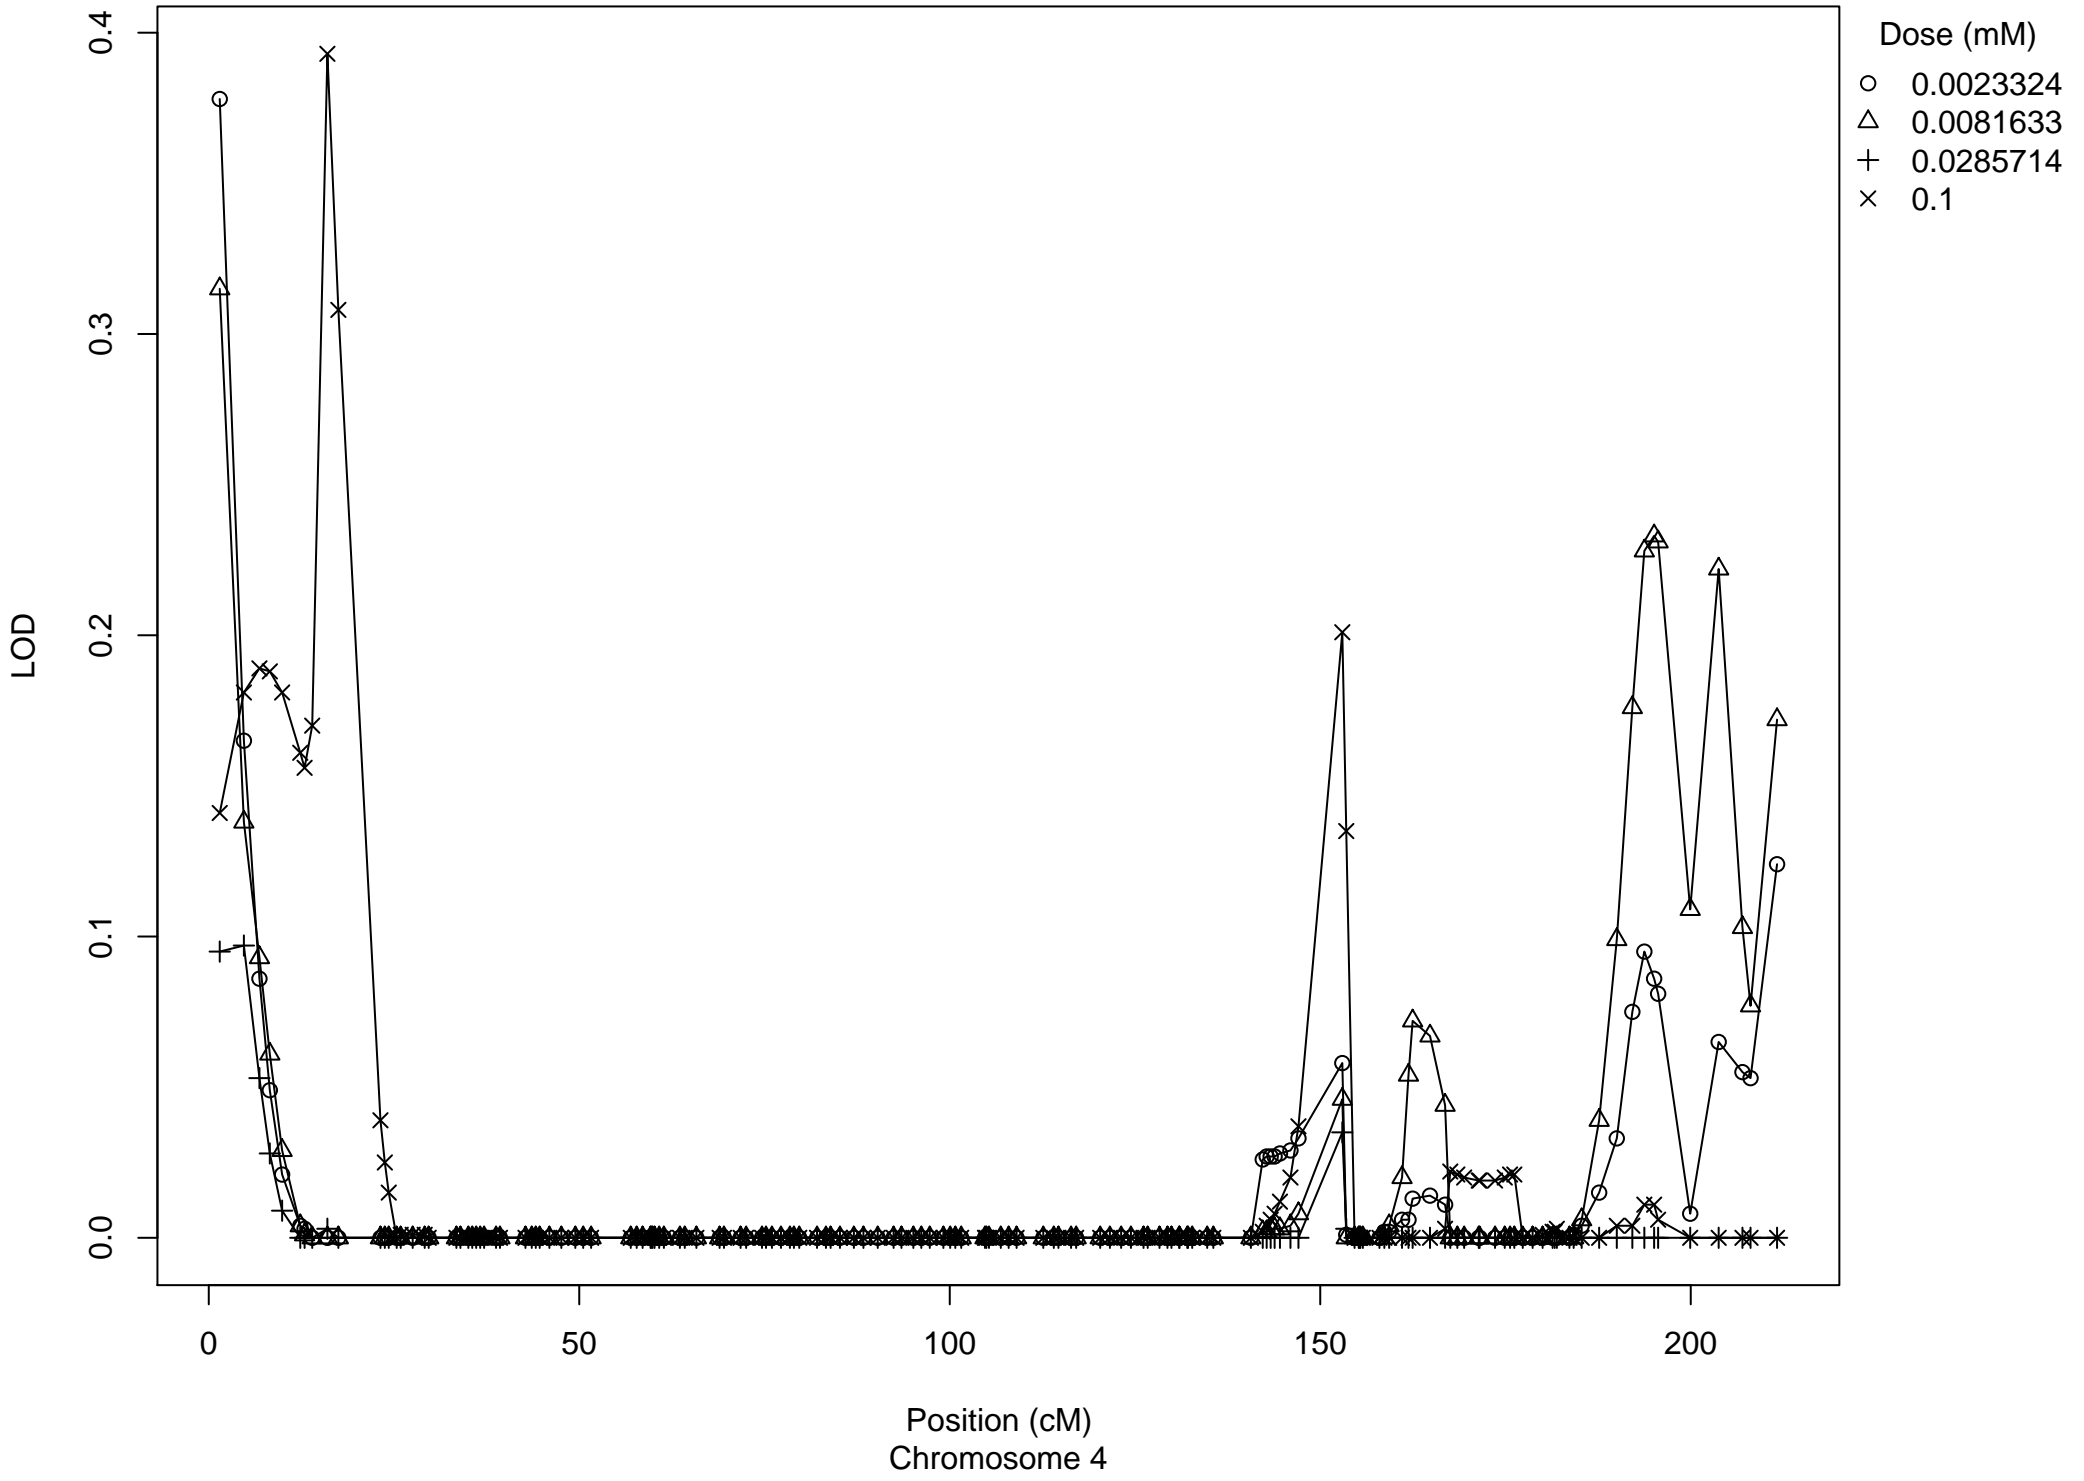

# 5-Fluoro-2-deoxyuridine (Flox)

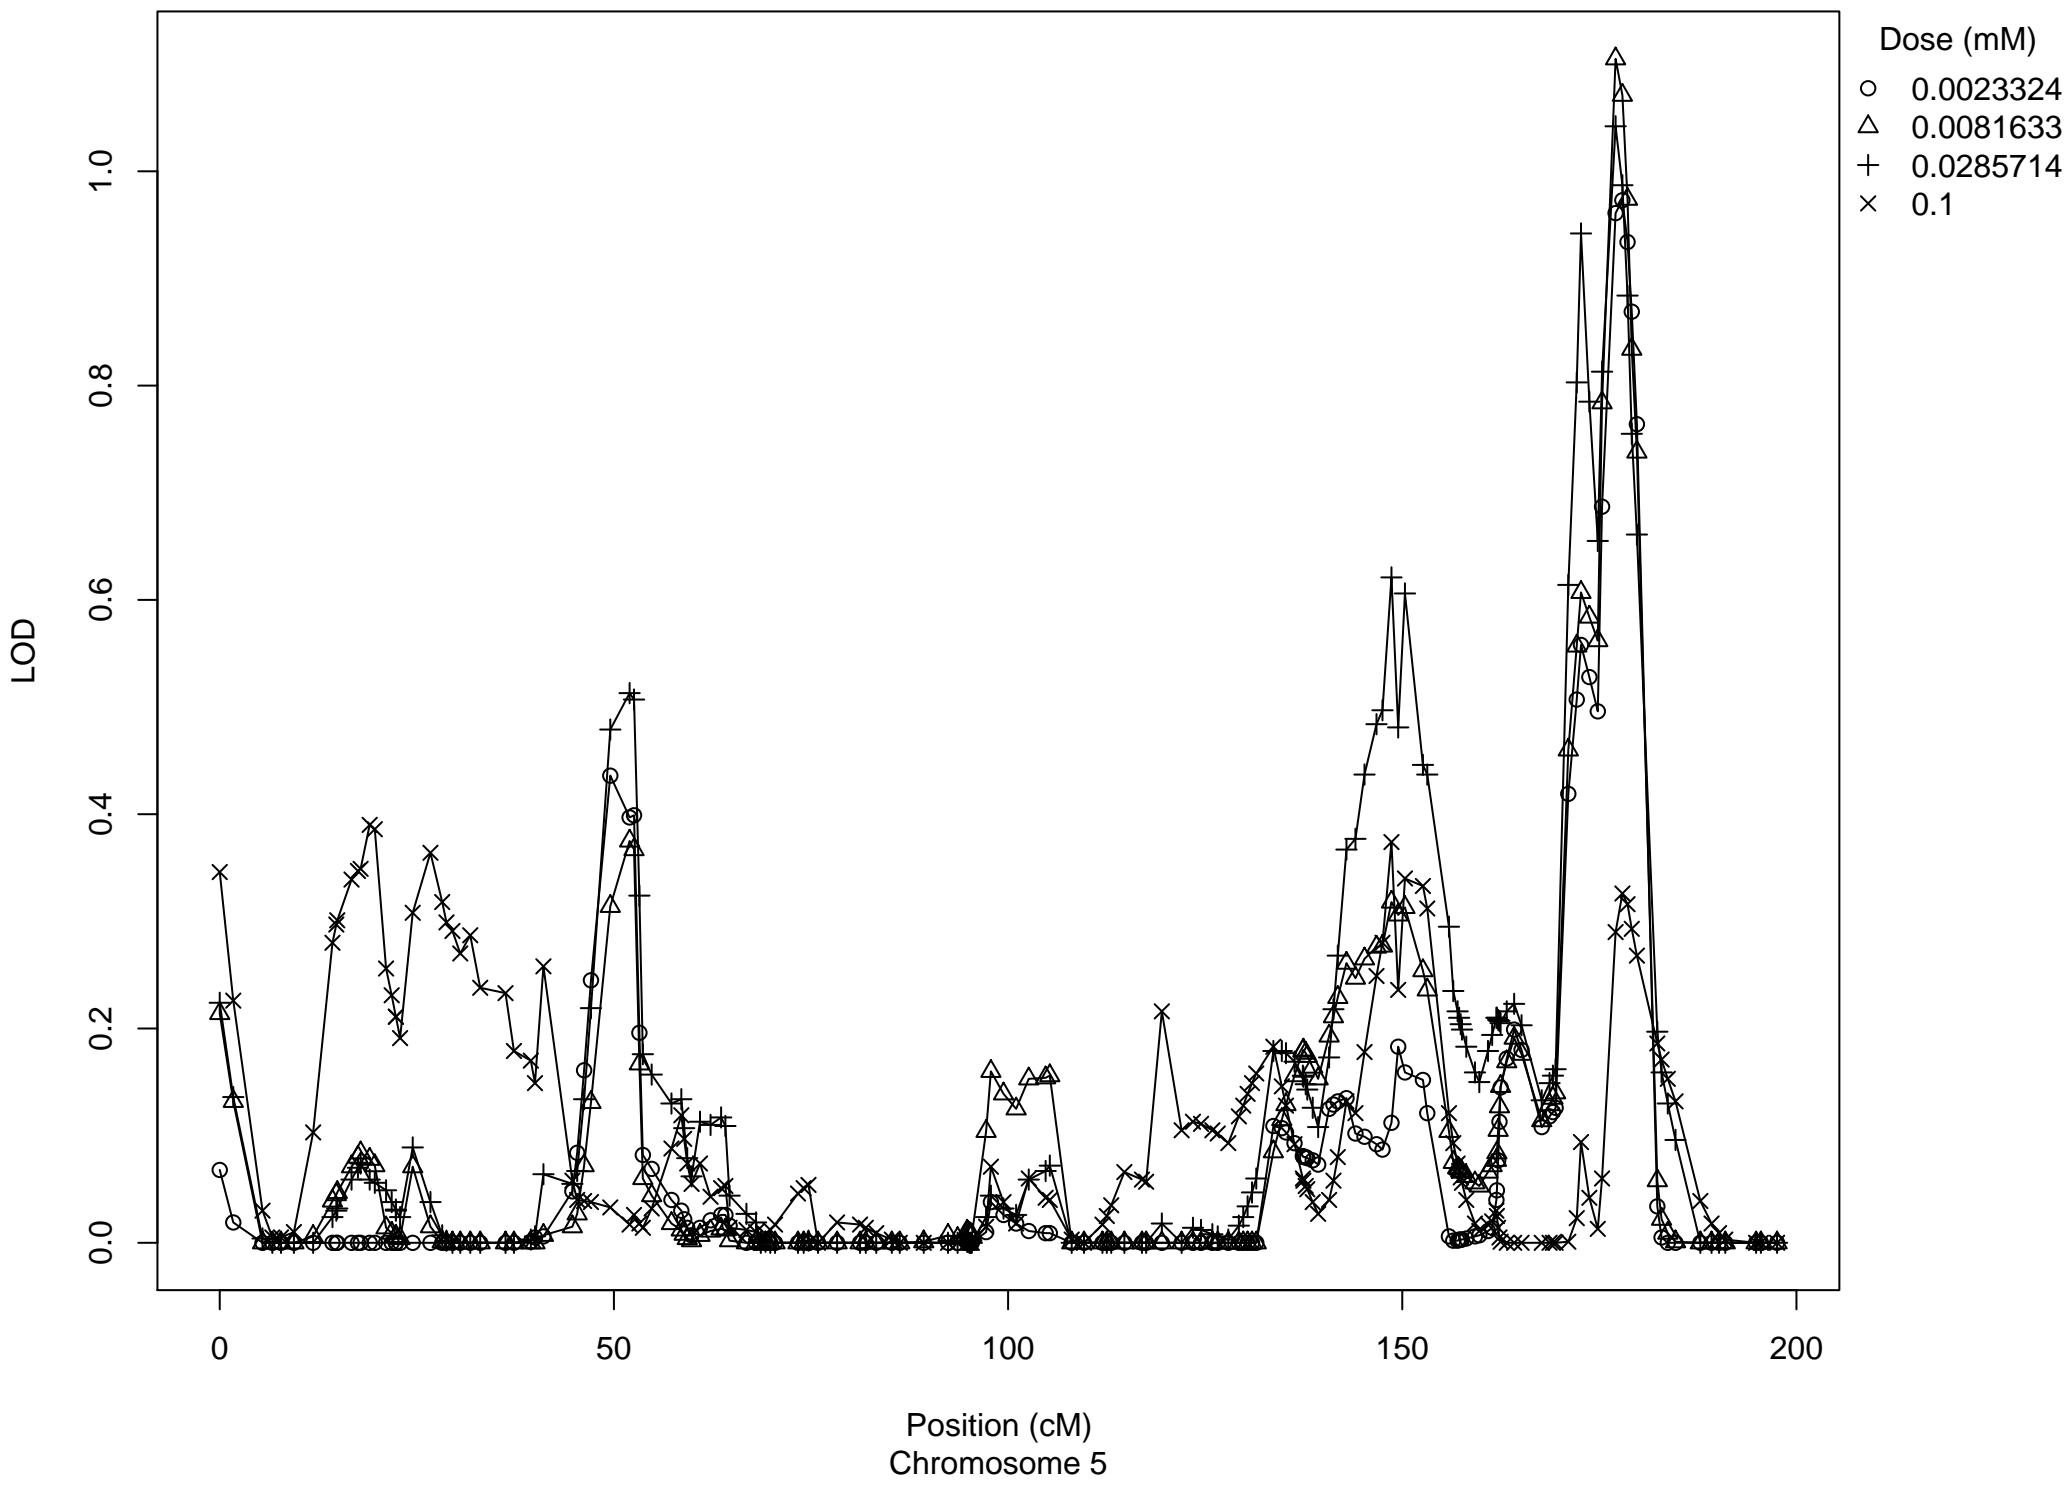

# 5-Fluoro-2-deoxyuridine (Flox)

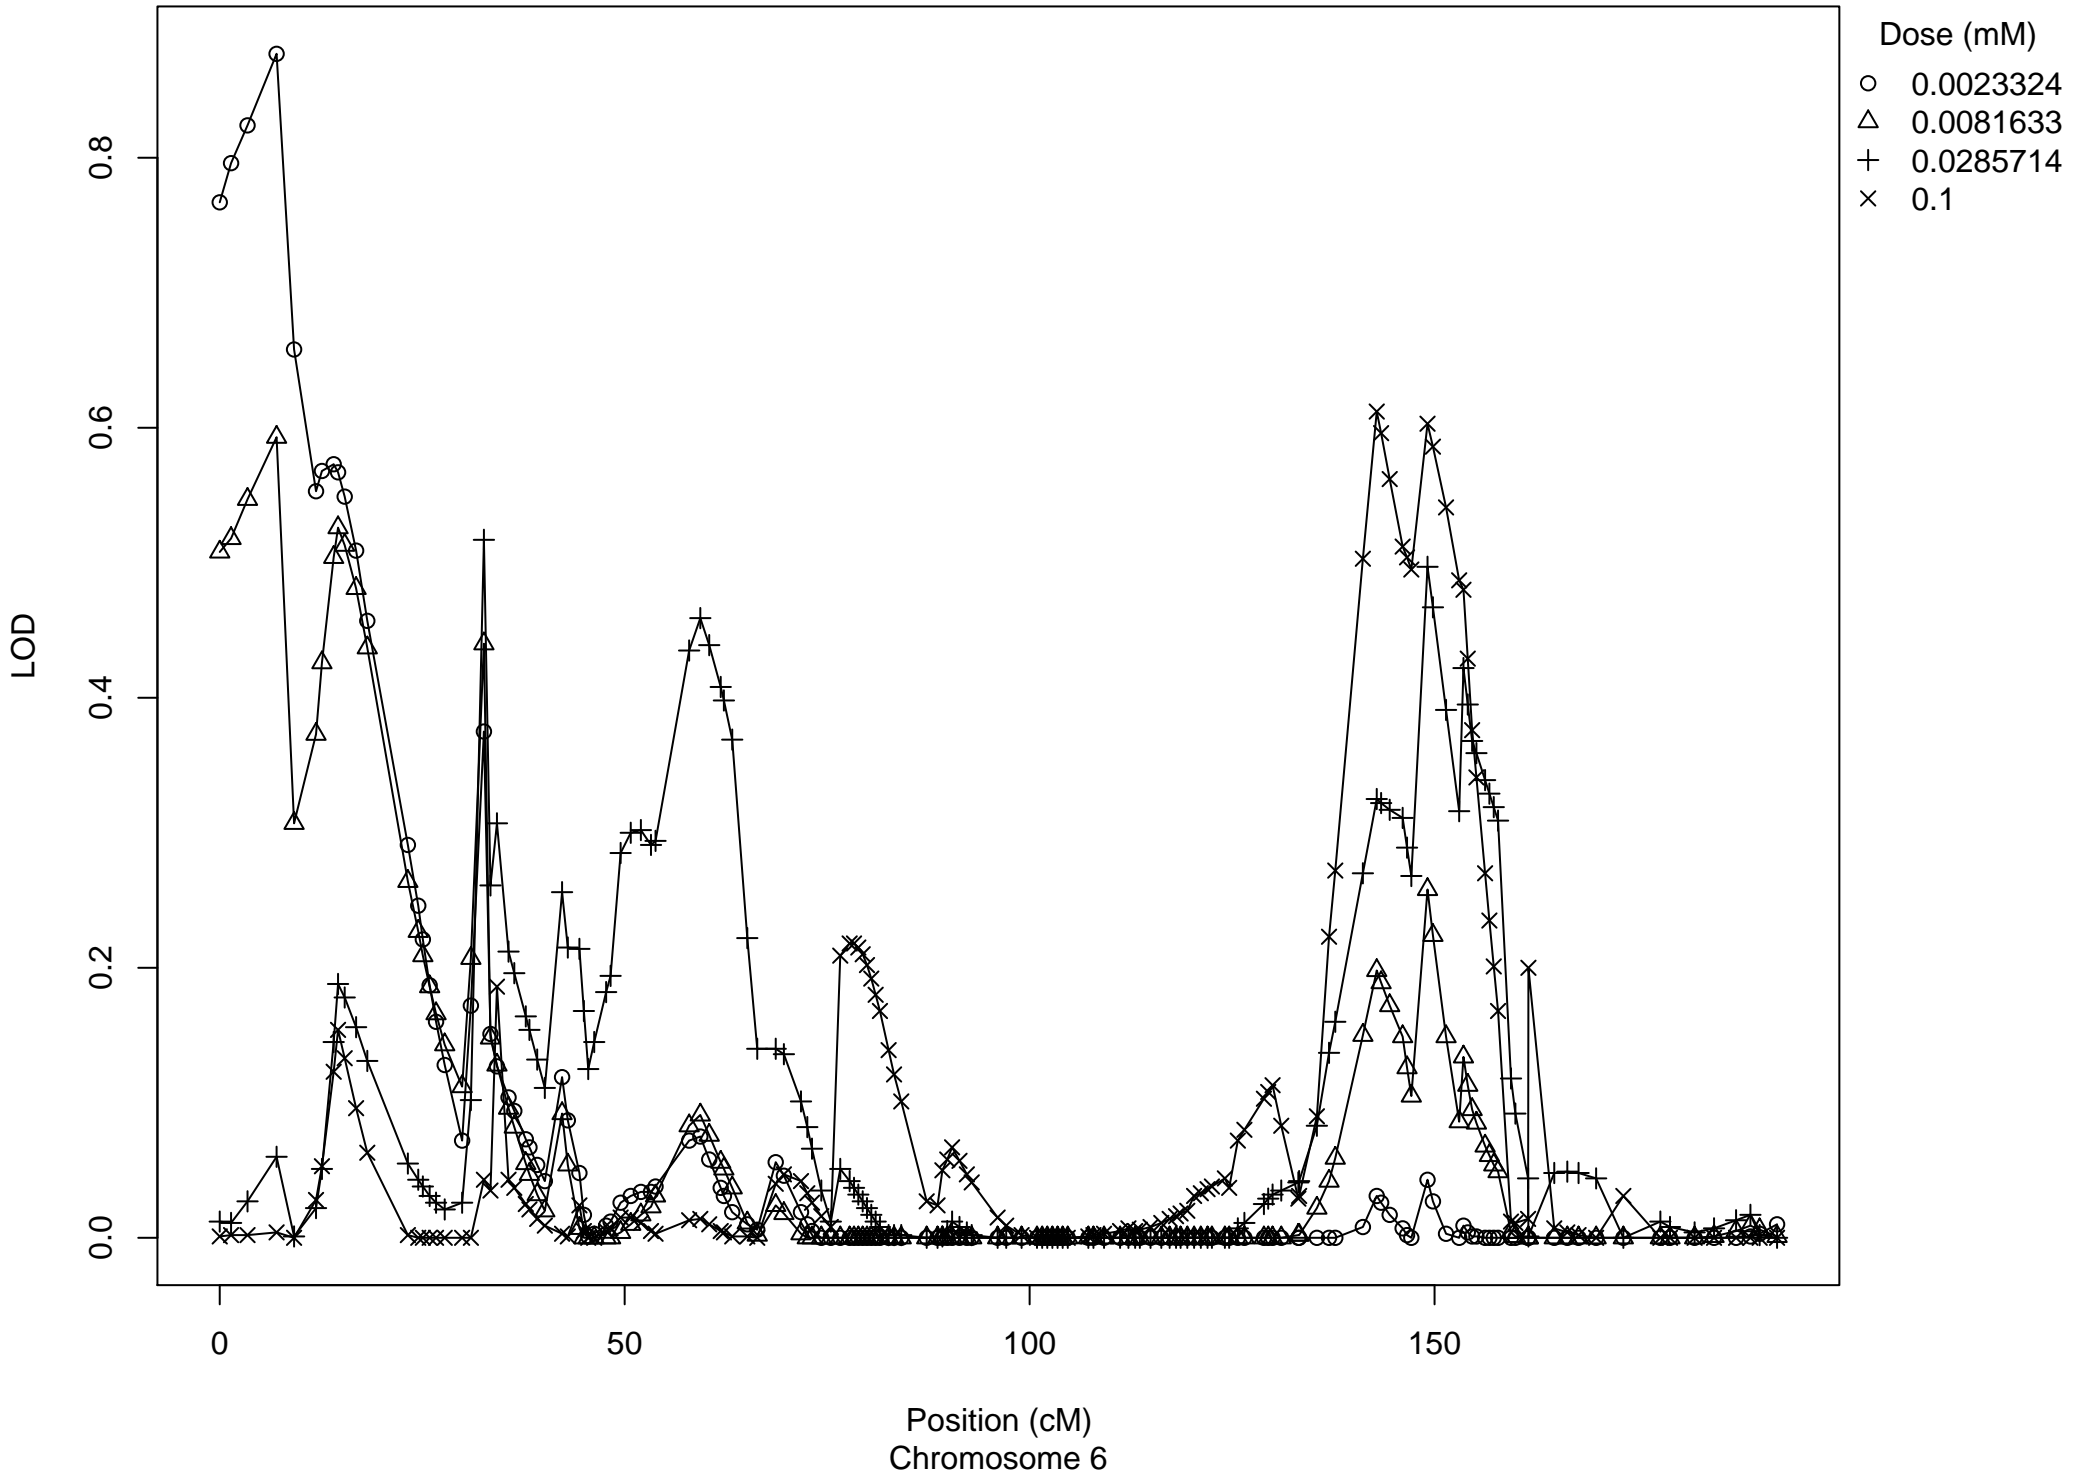



# 5-Fluoro-2-deoxyuridine (Flox)

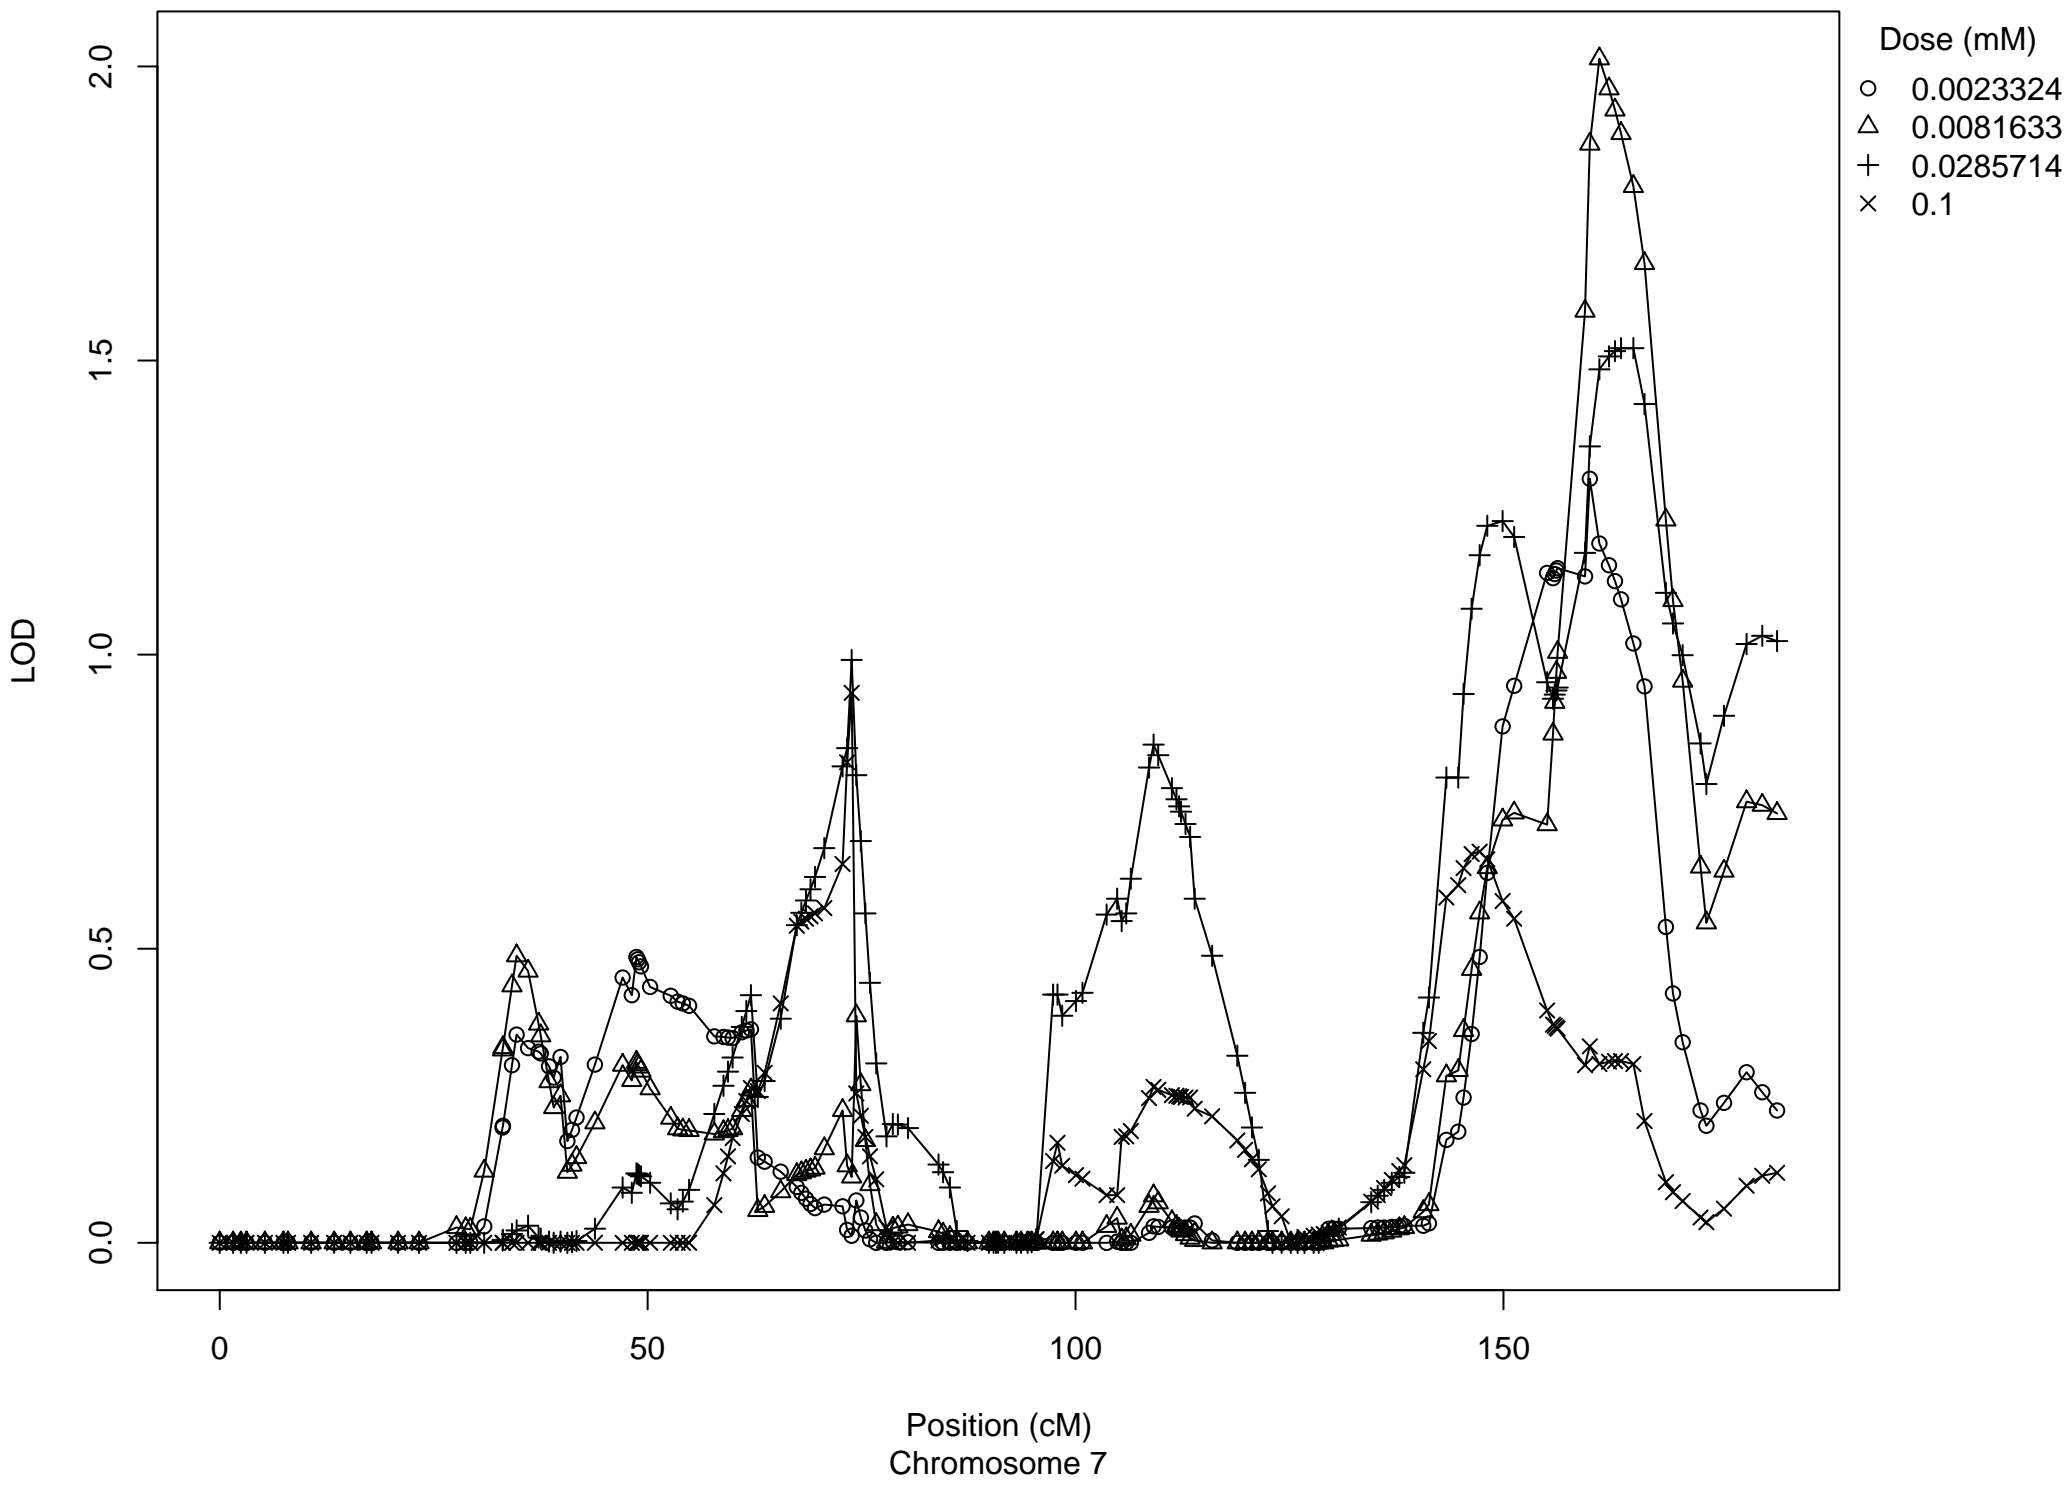

# 5-Fluoro-2-deoxyuridine (Flox)

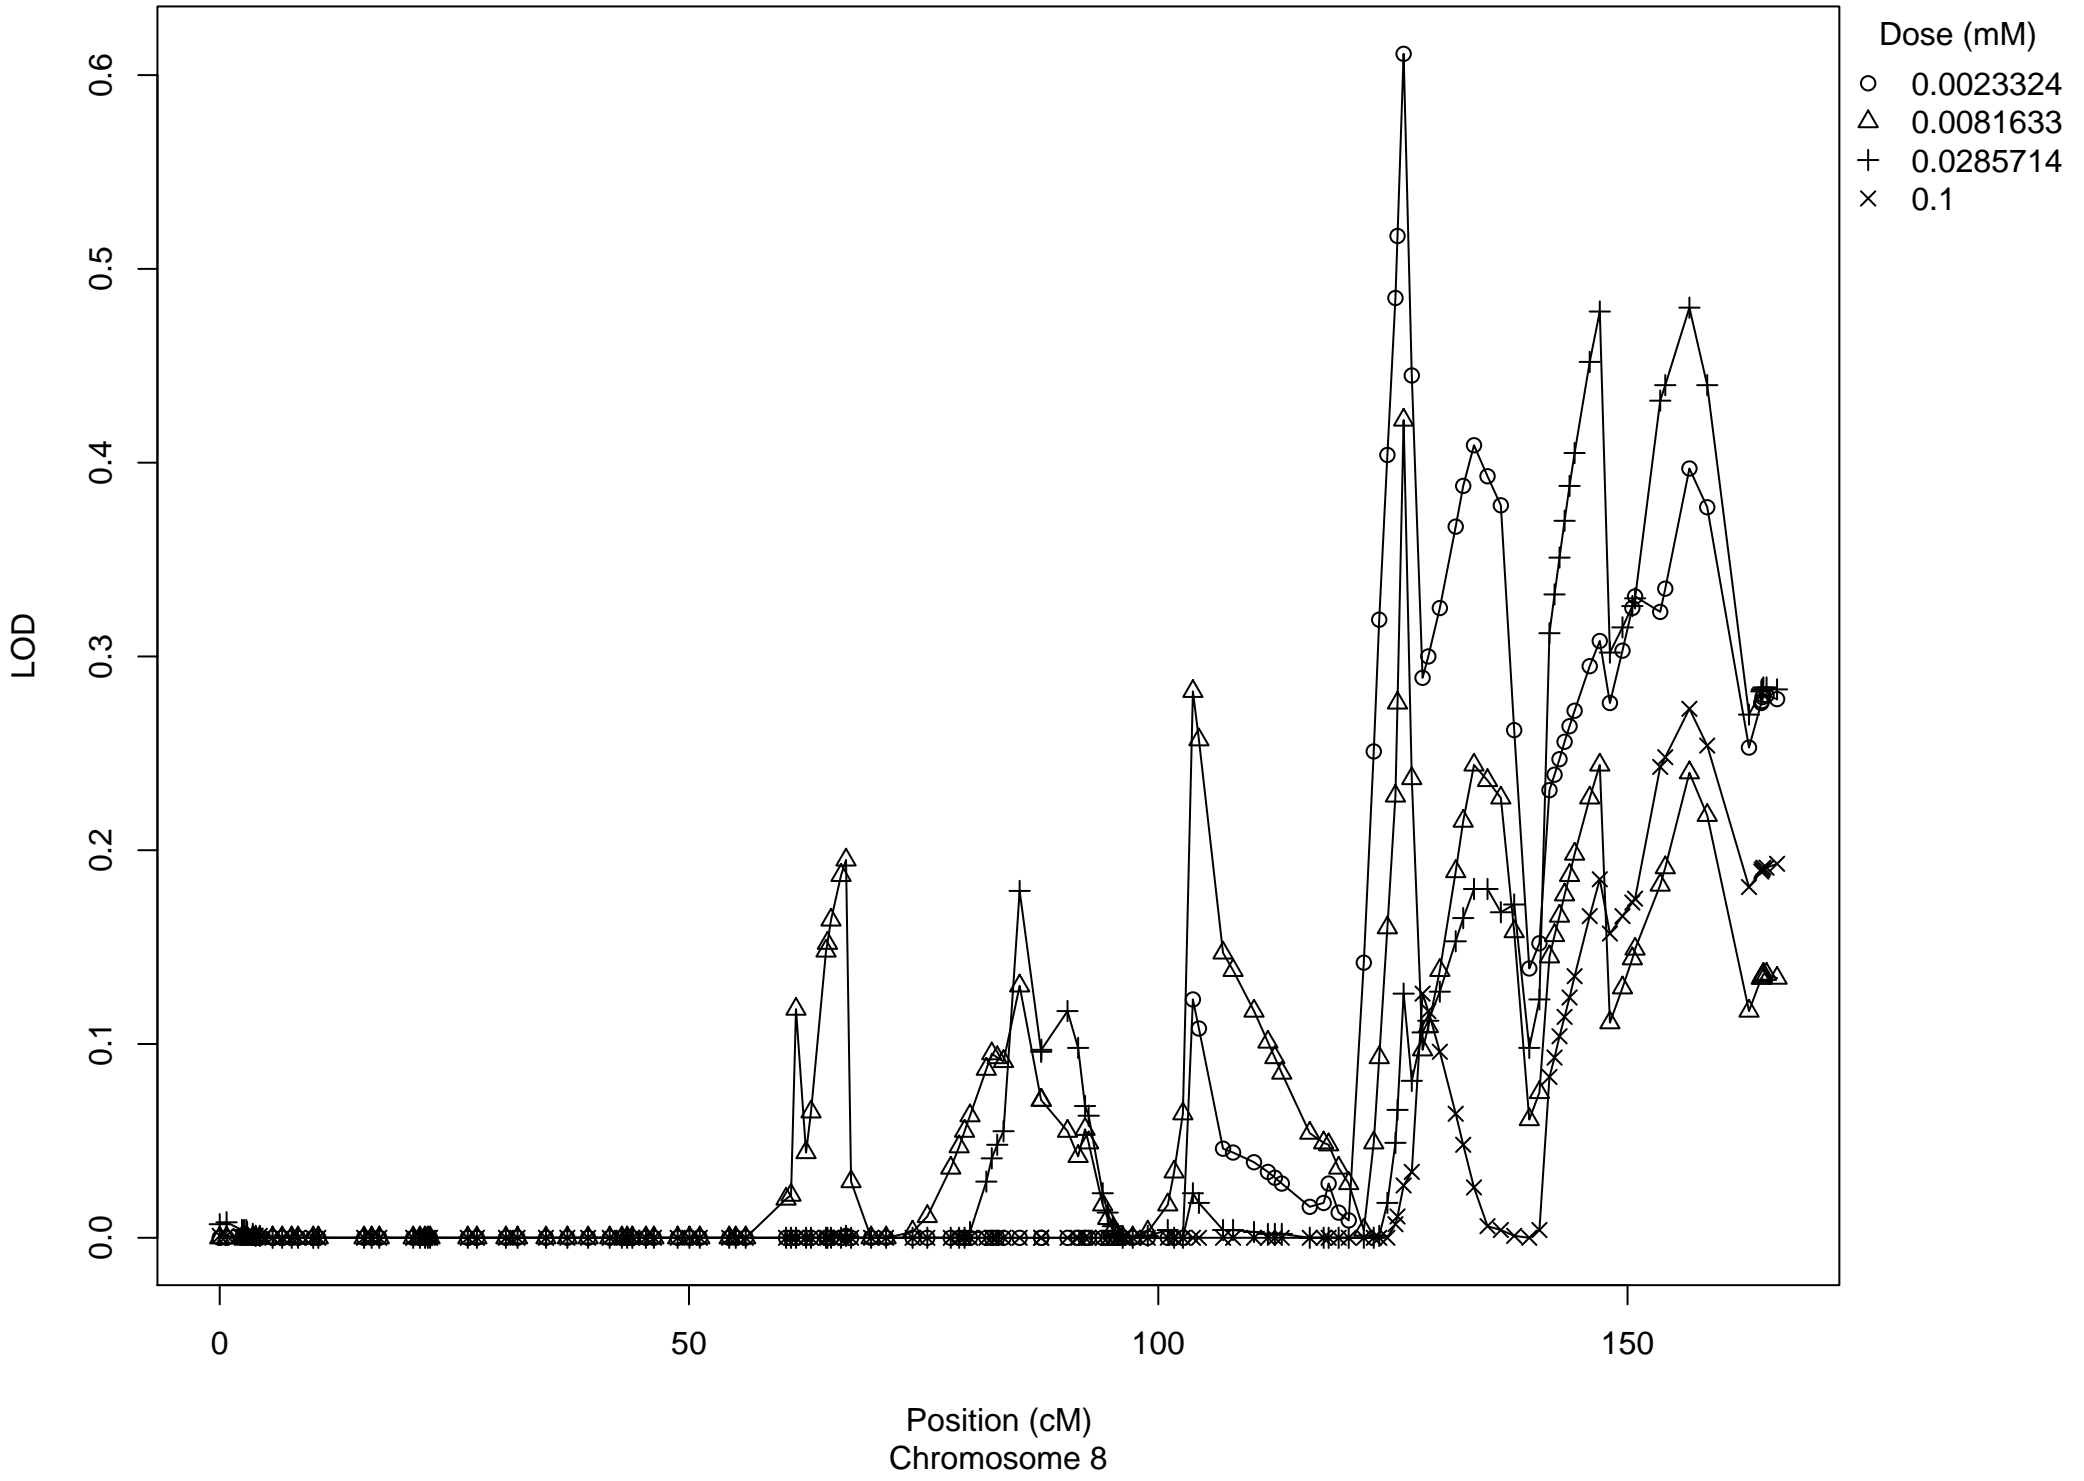

# 5-Fluoro-2-deoxyuridine (Flox)

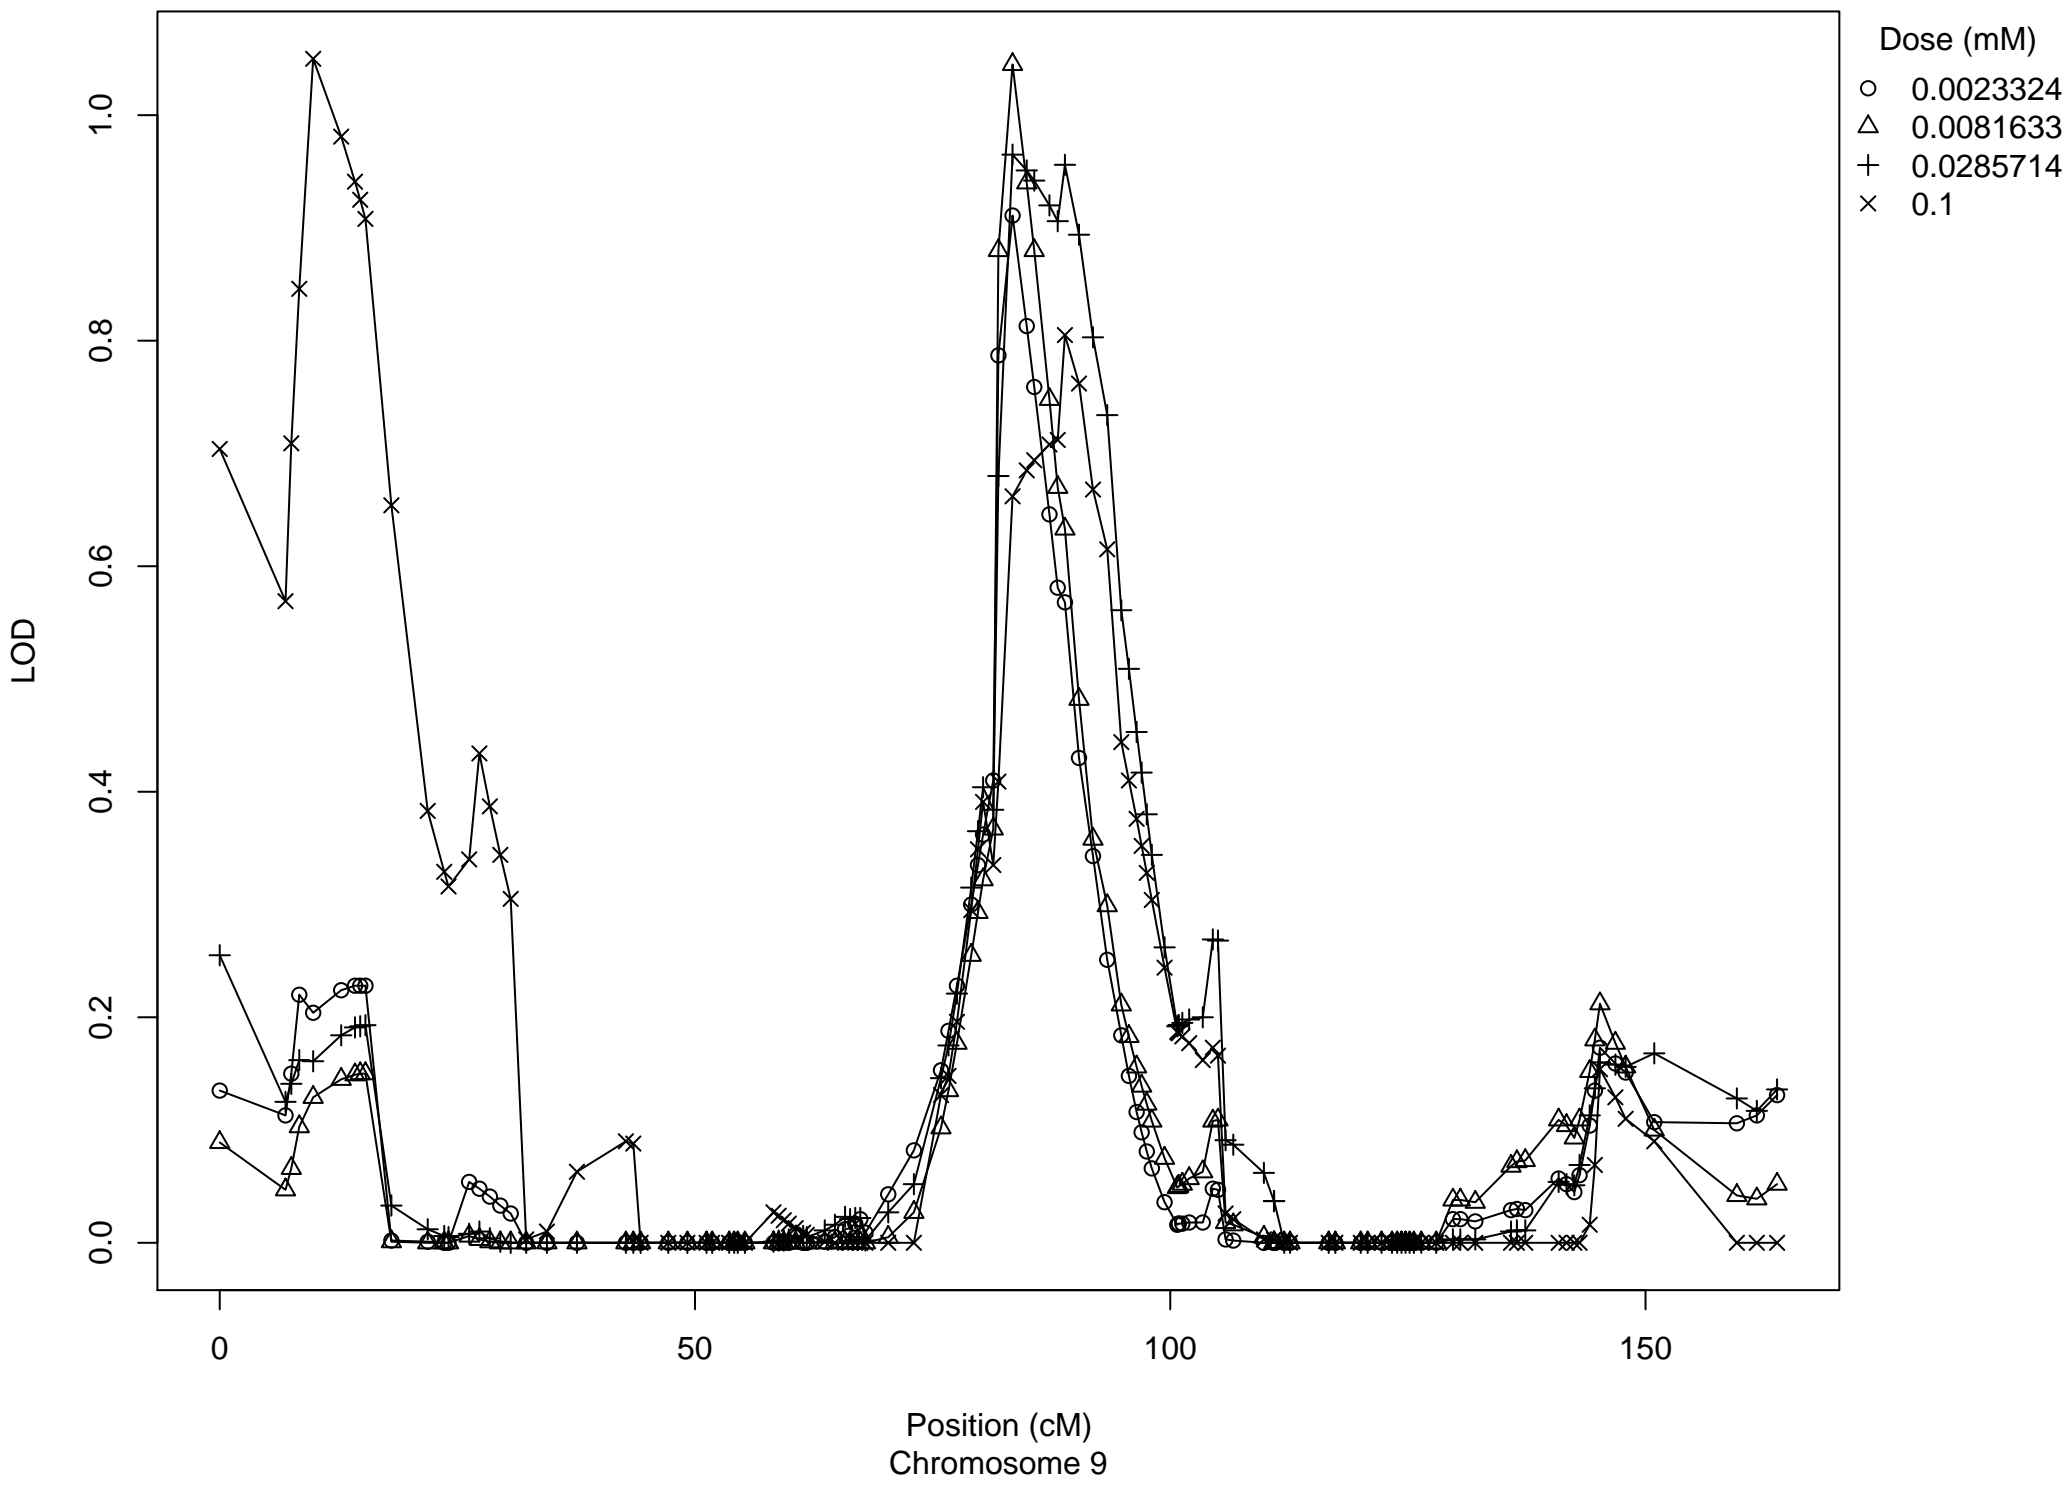

# 5-Fluoro-2-deoxyuridine (Flox)

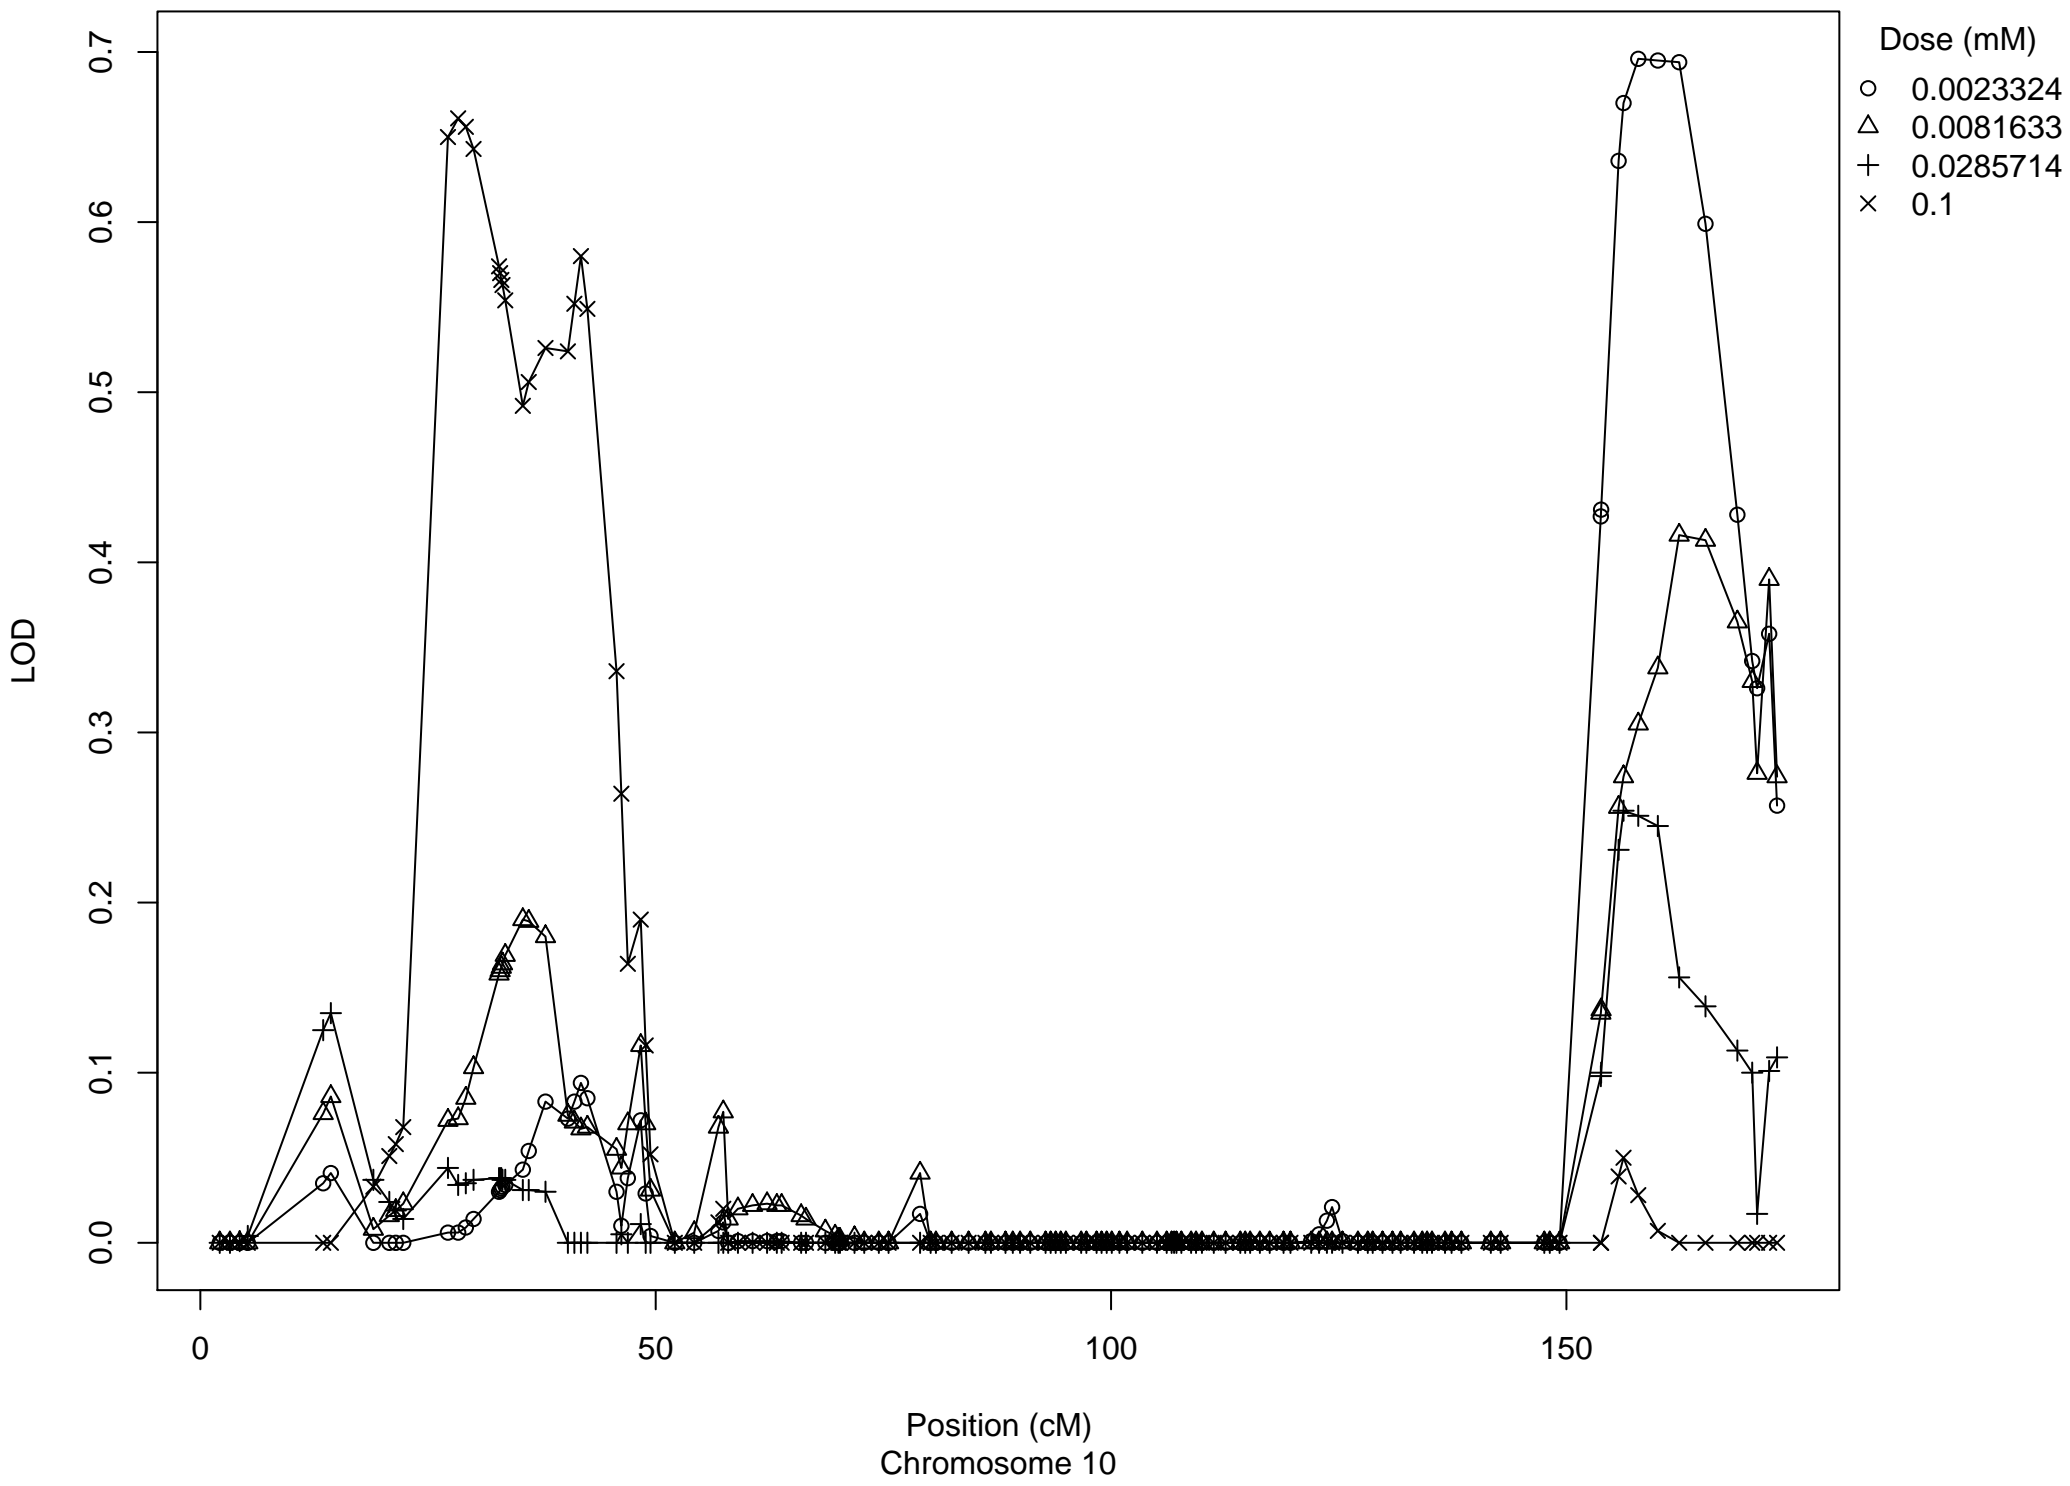

# 5-Fluoro-2-deoxyuridine (Flox)

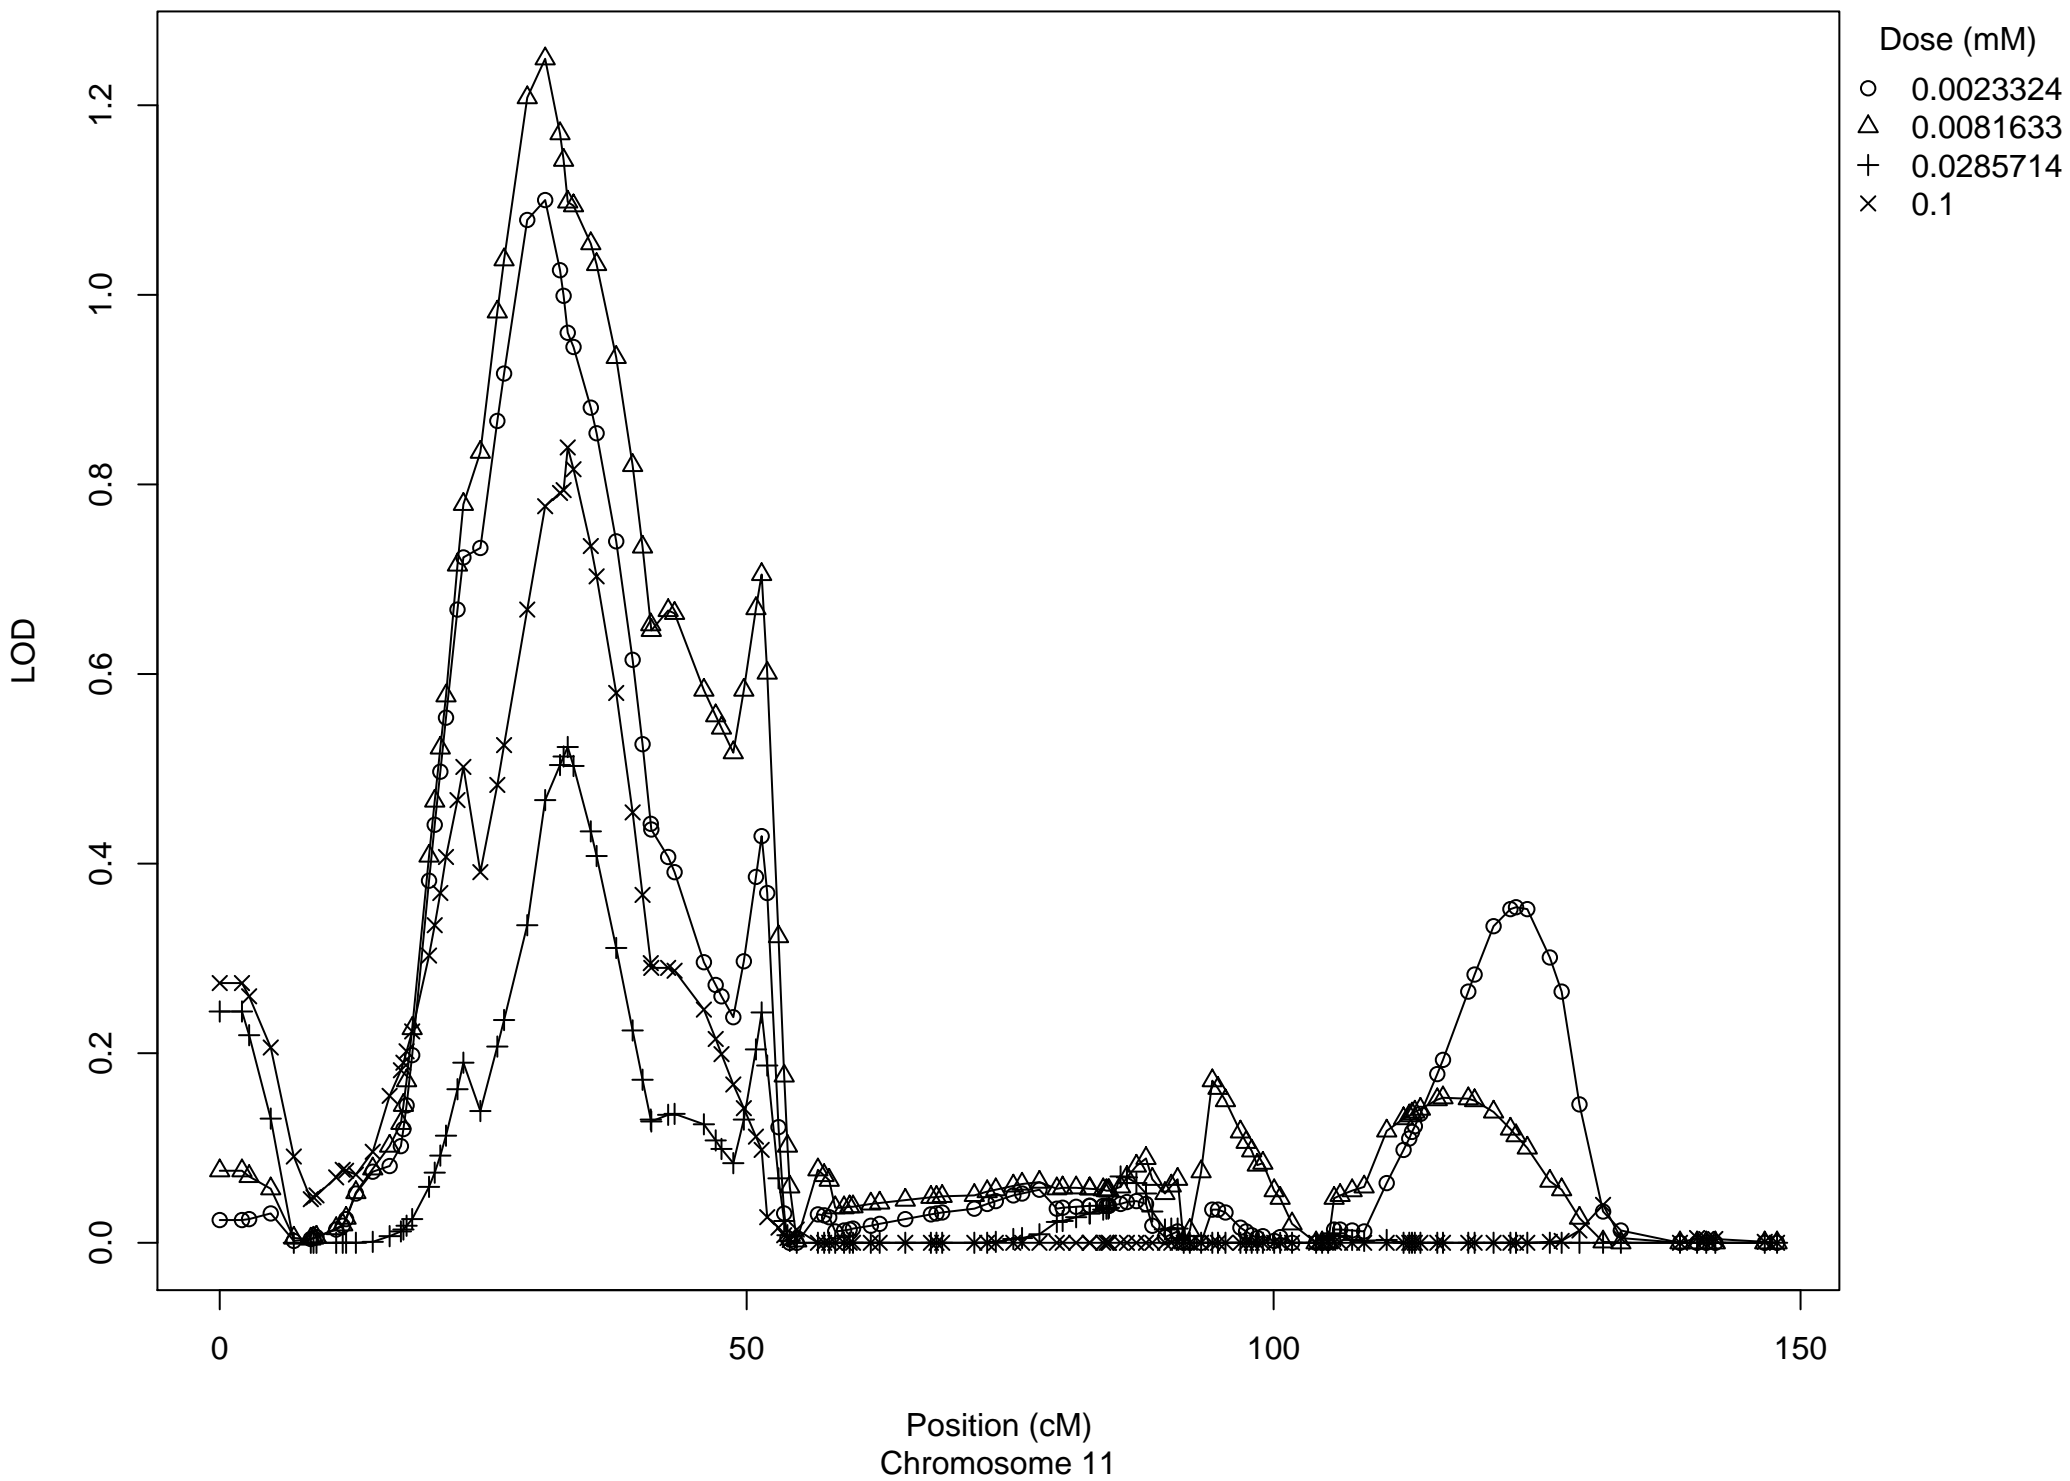

# 5-Fluoro-2-deoxyuridine (Flox)

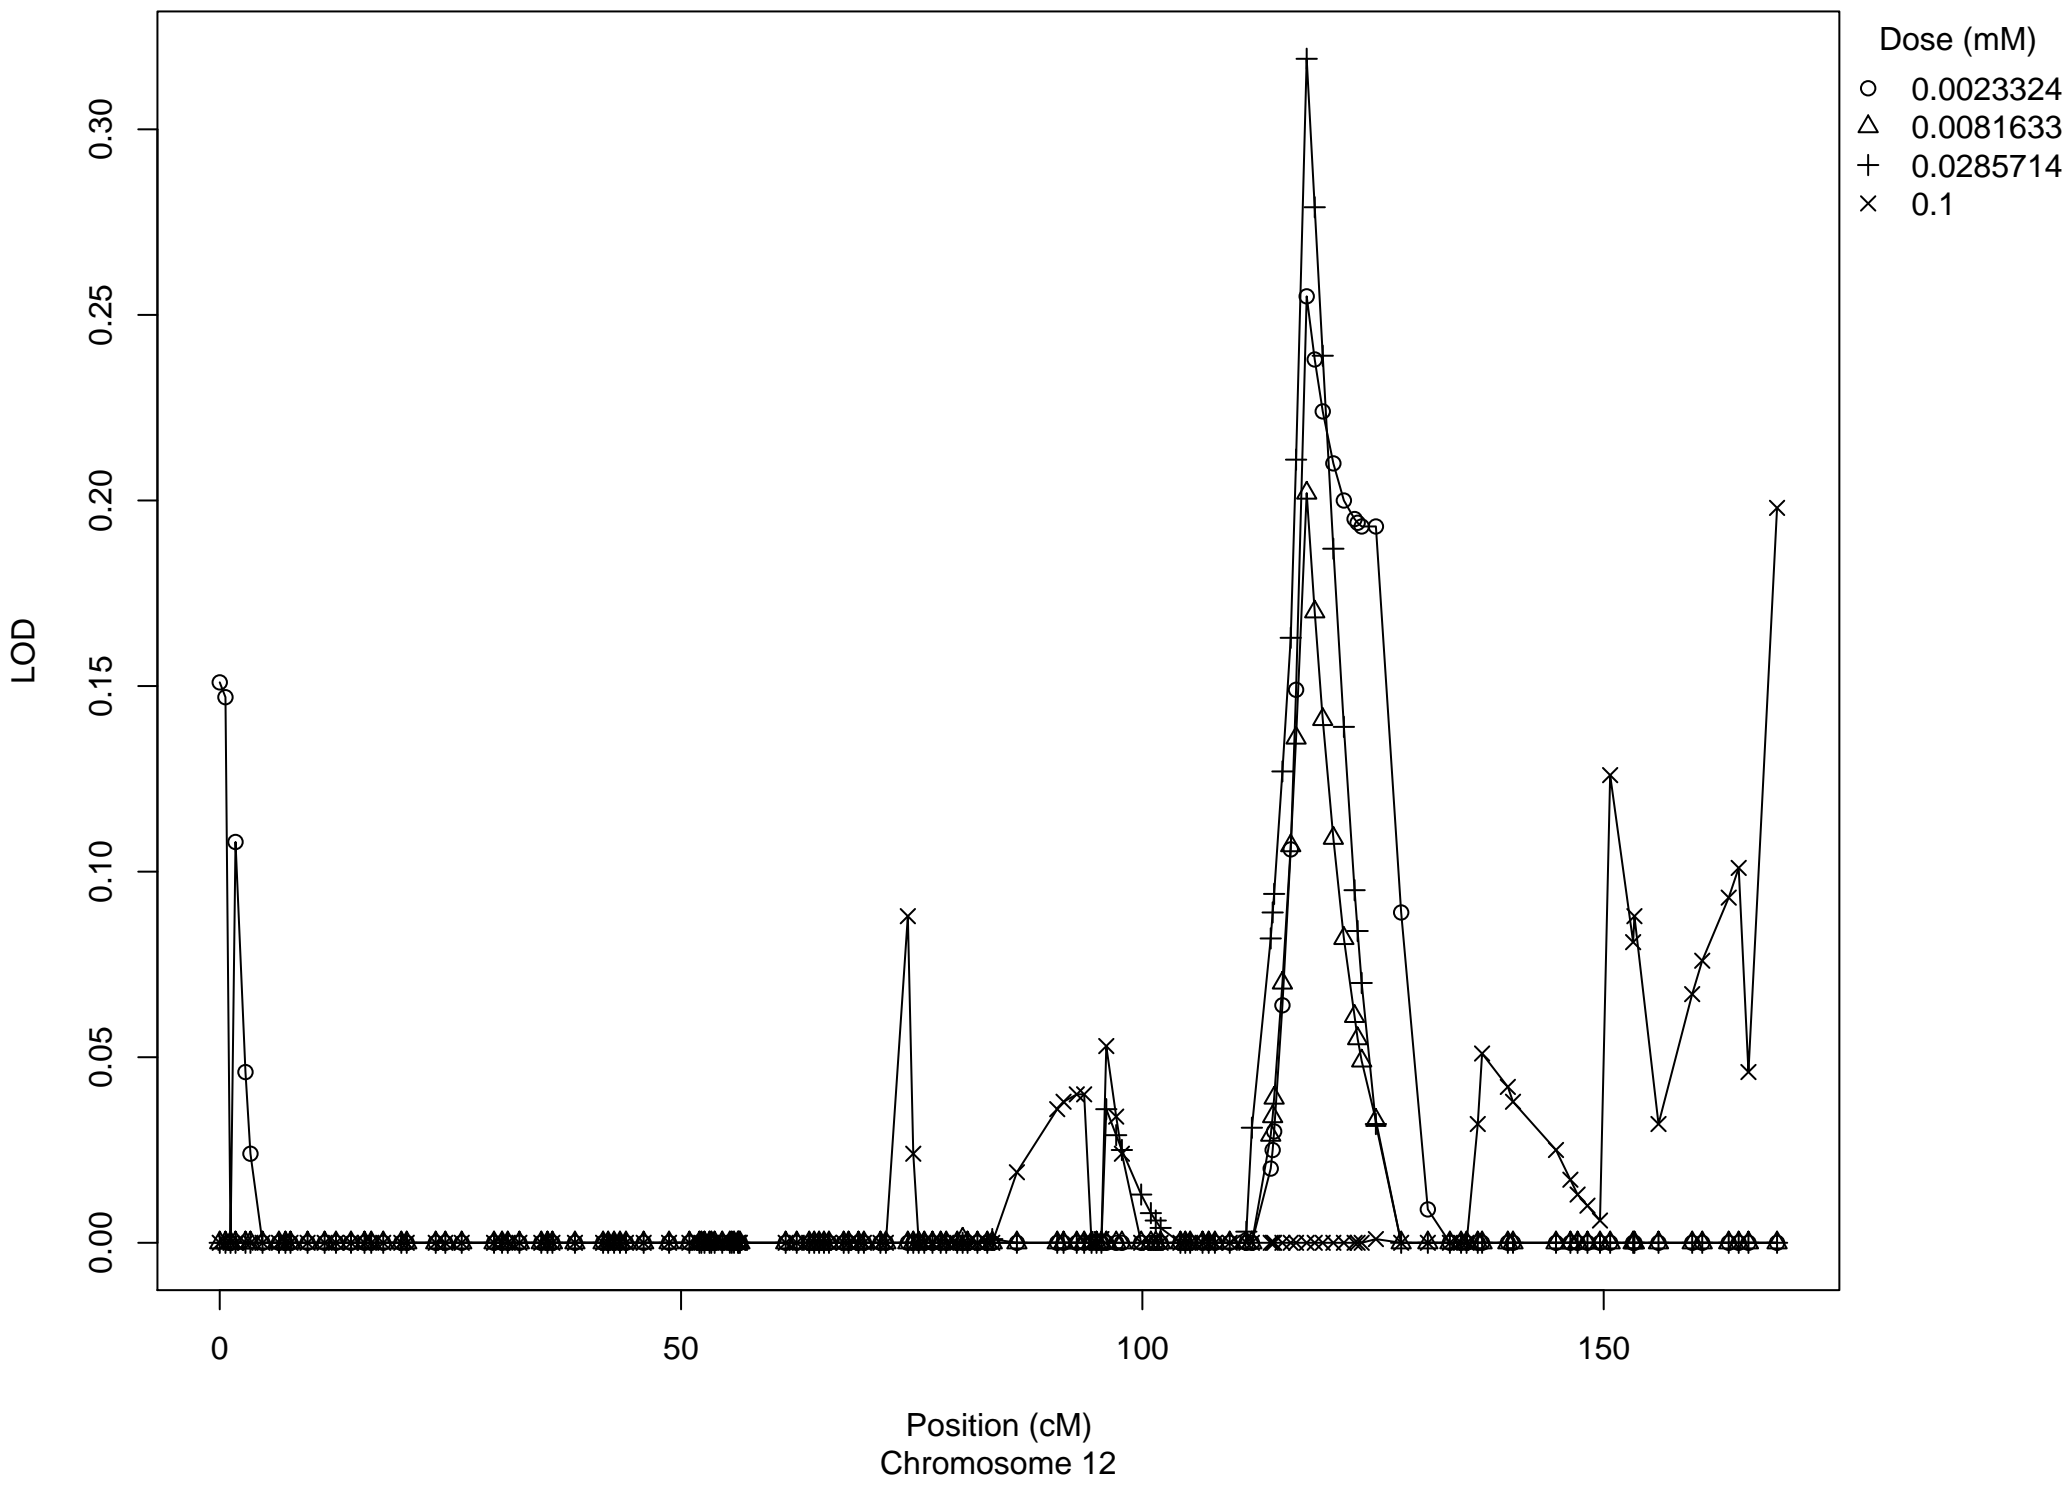

# 5-Fluoro-2-deoxyuridine (Flox)

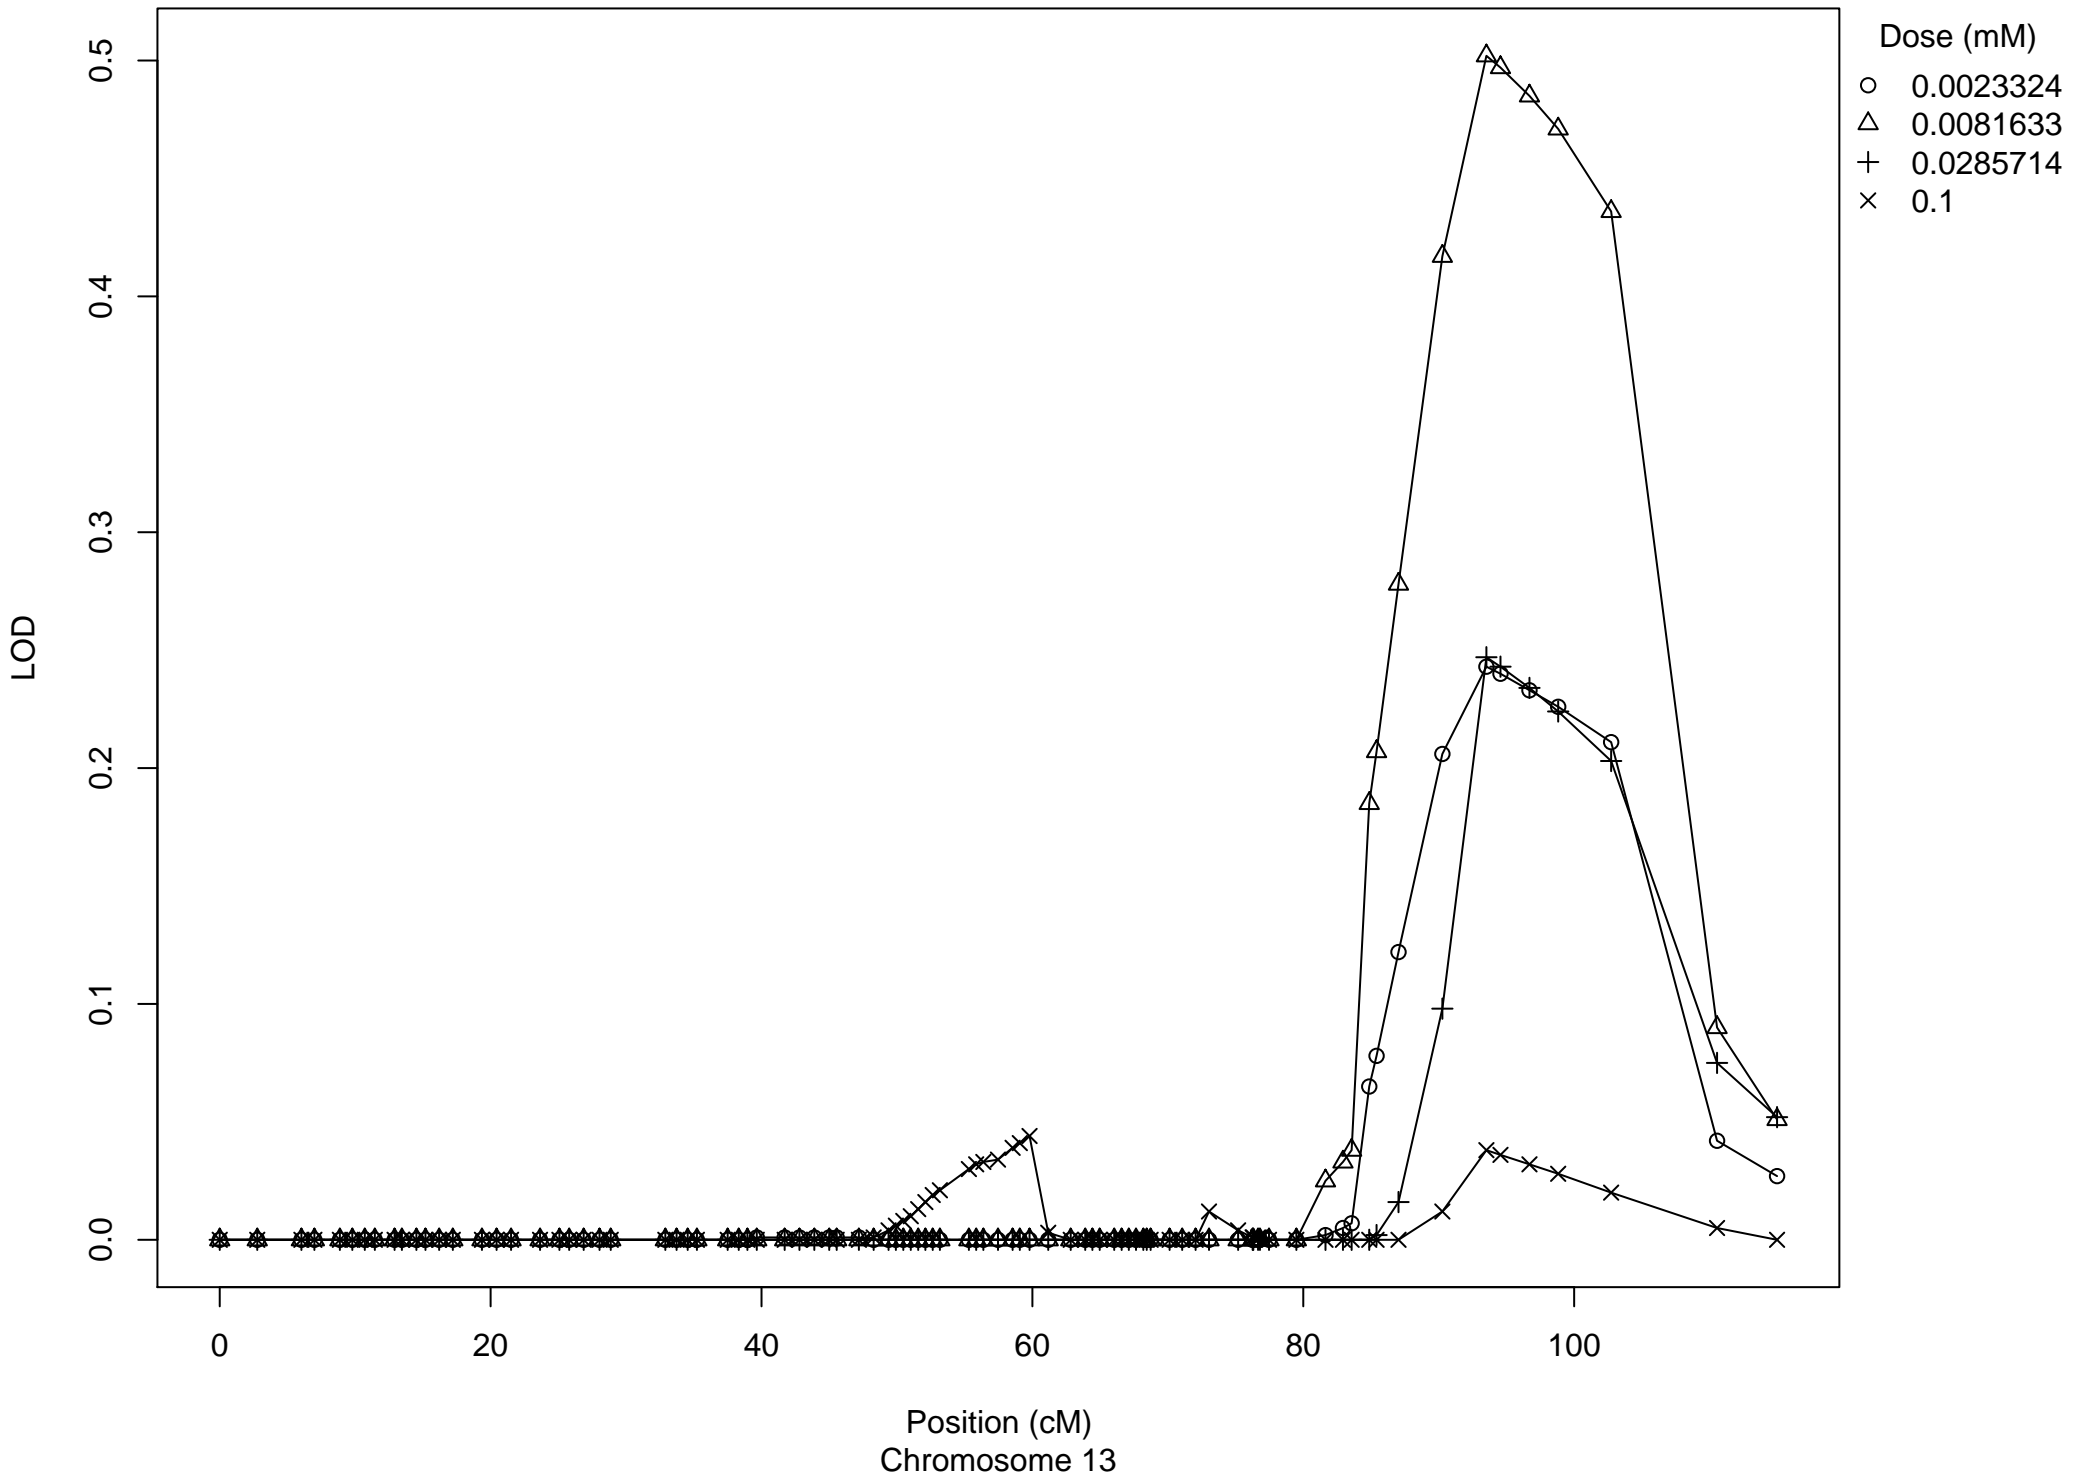

# 5-Fluoro-2-deoxyuridine (Flox)

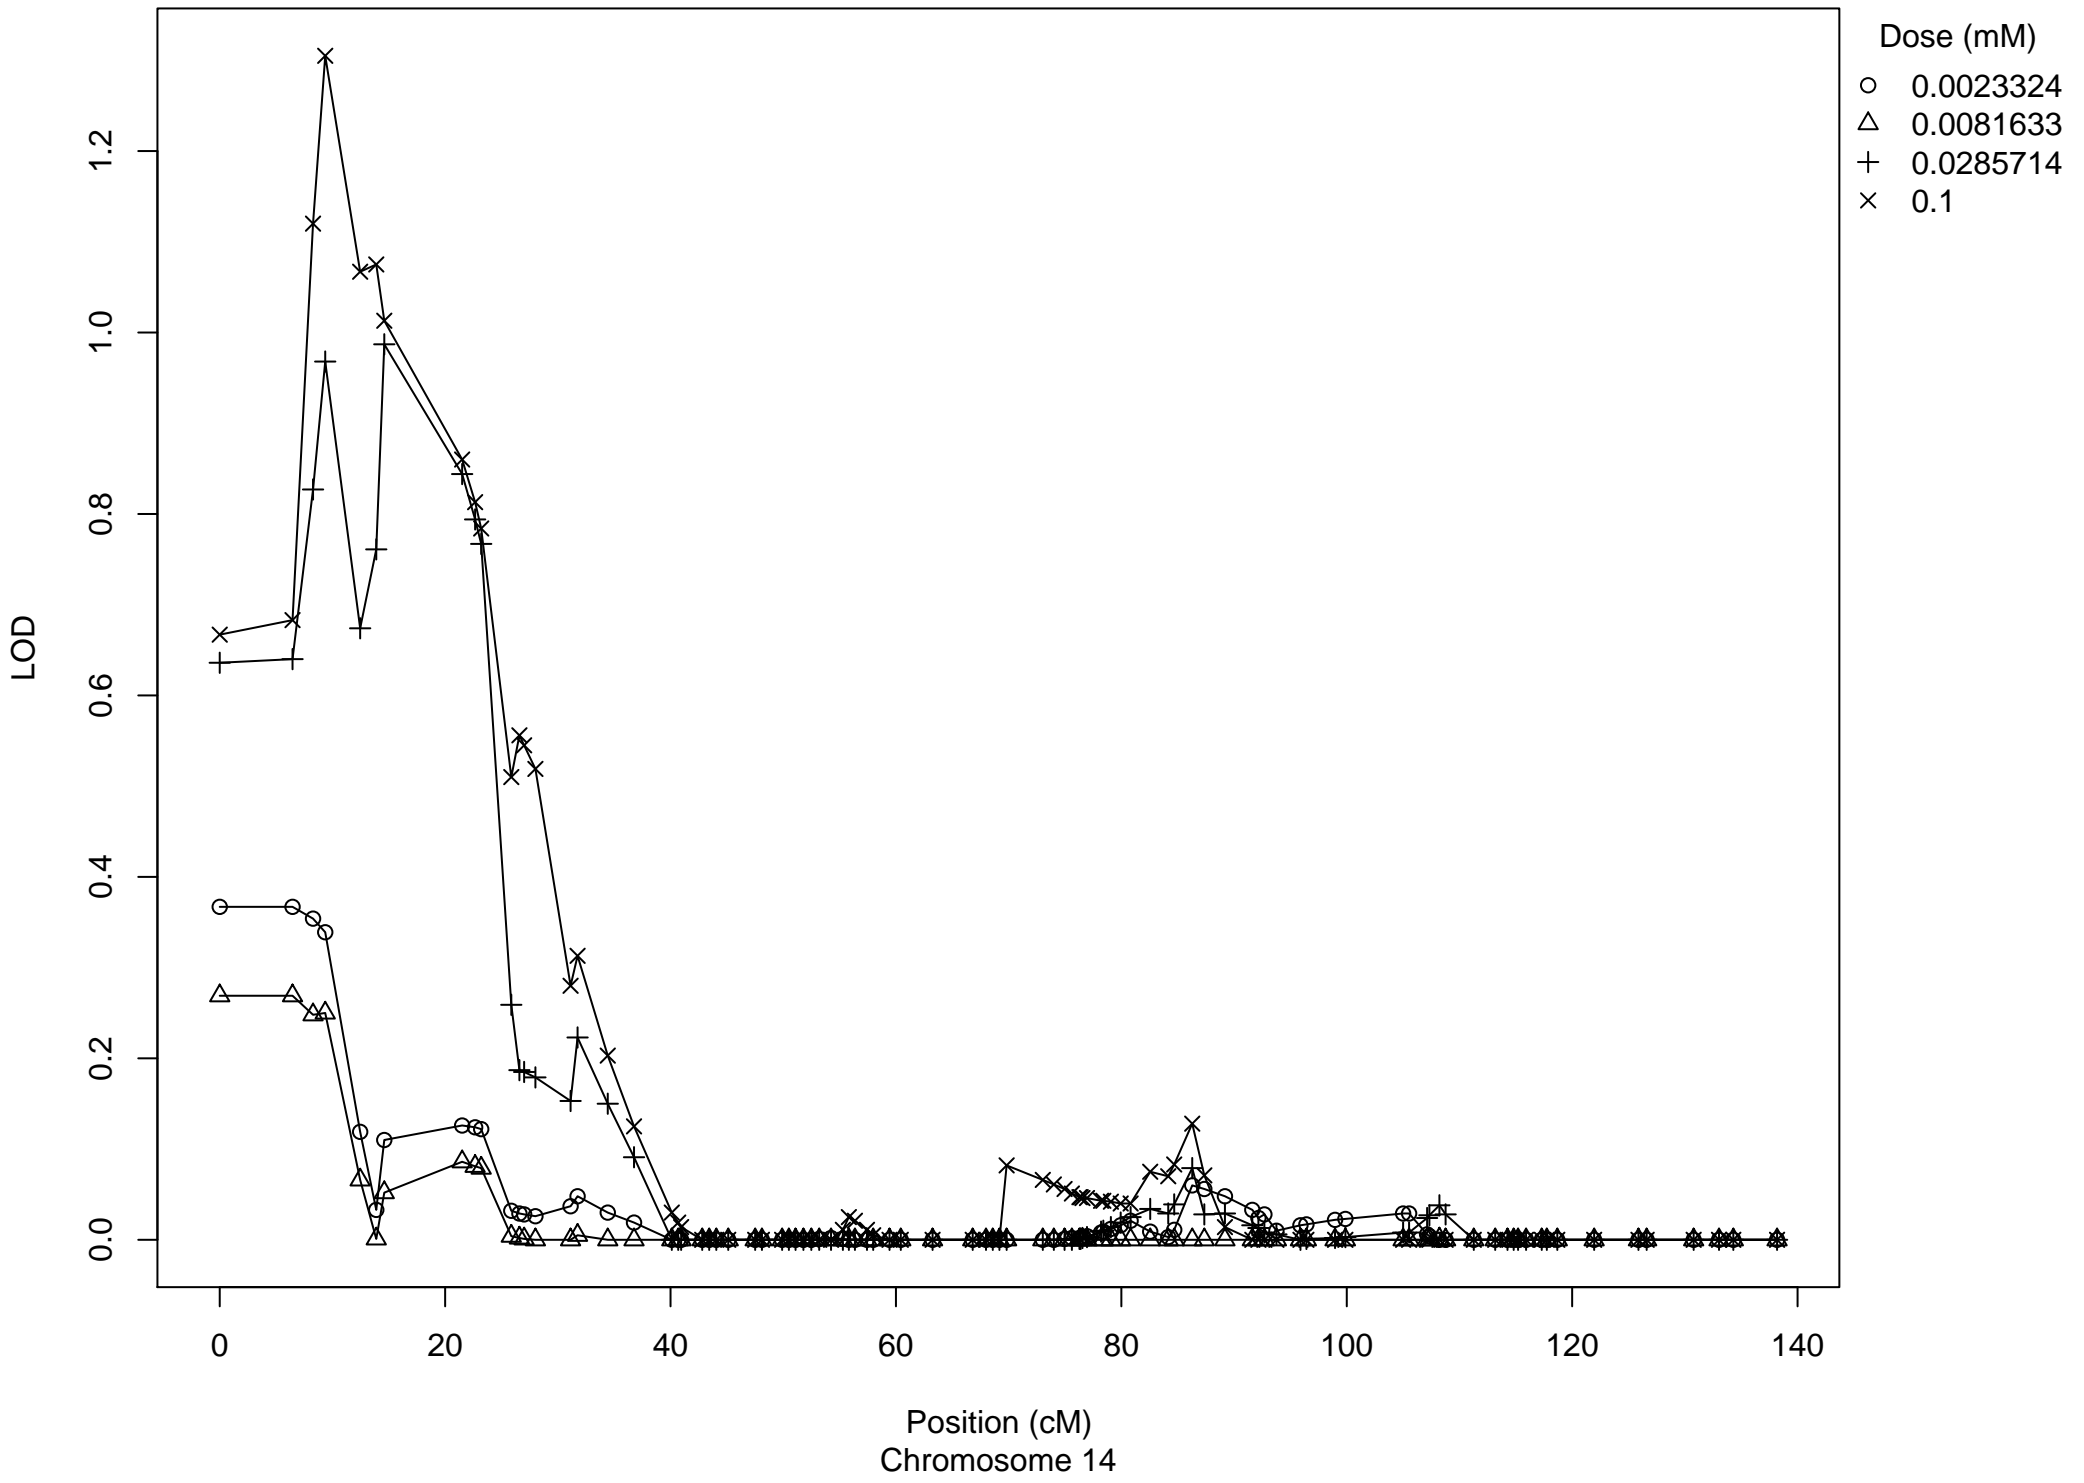



# 5-Fluoro-2-deoxyuridine (Flox)

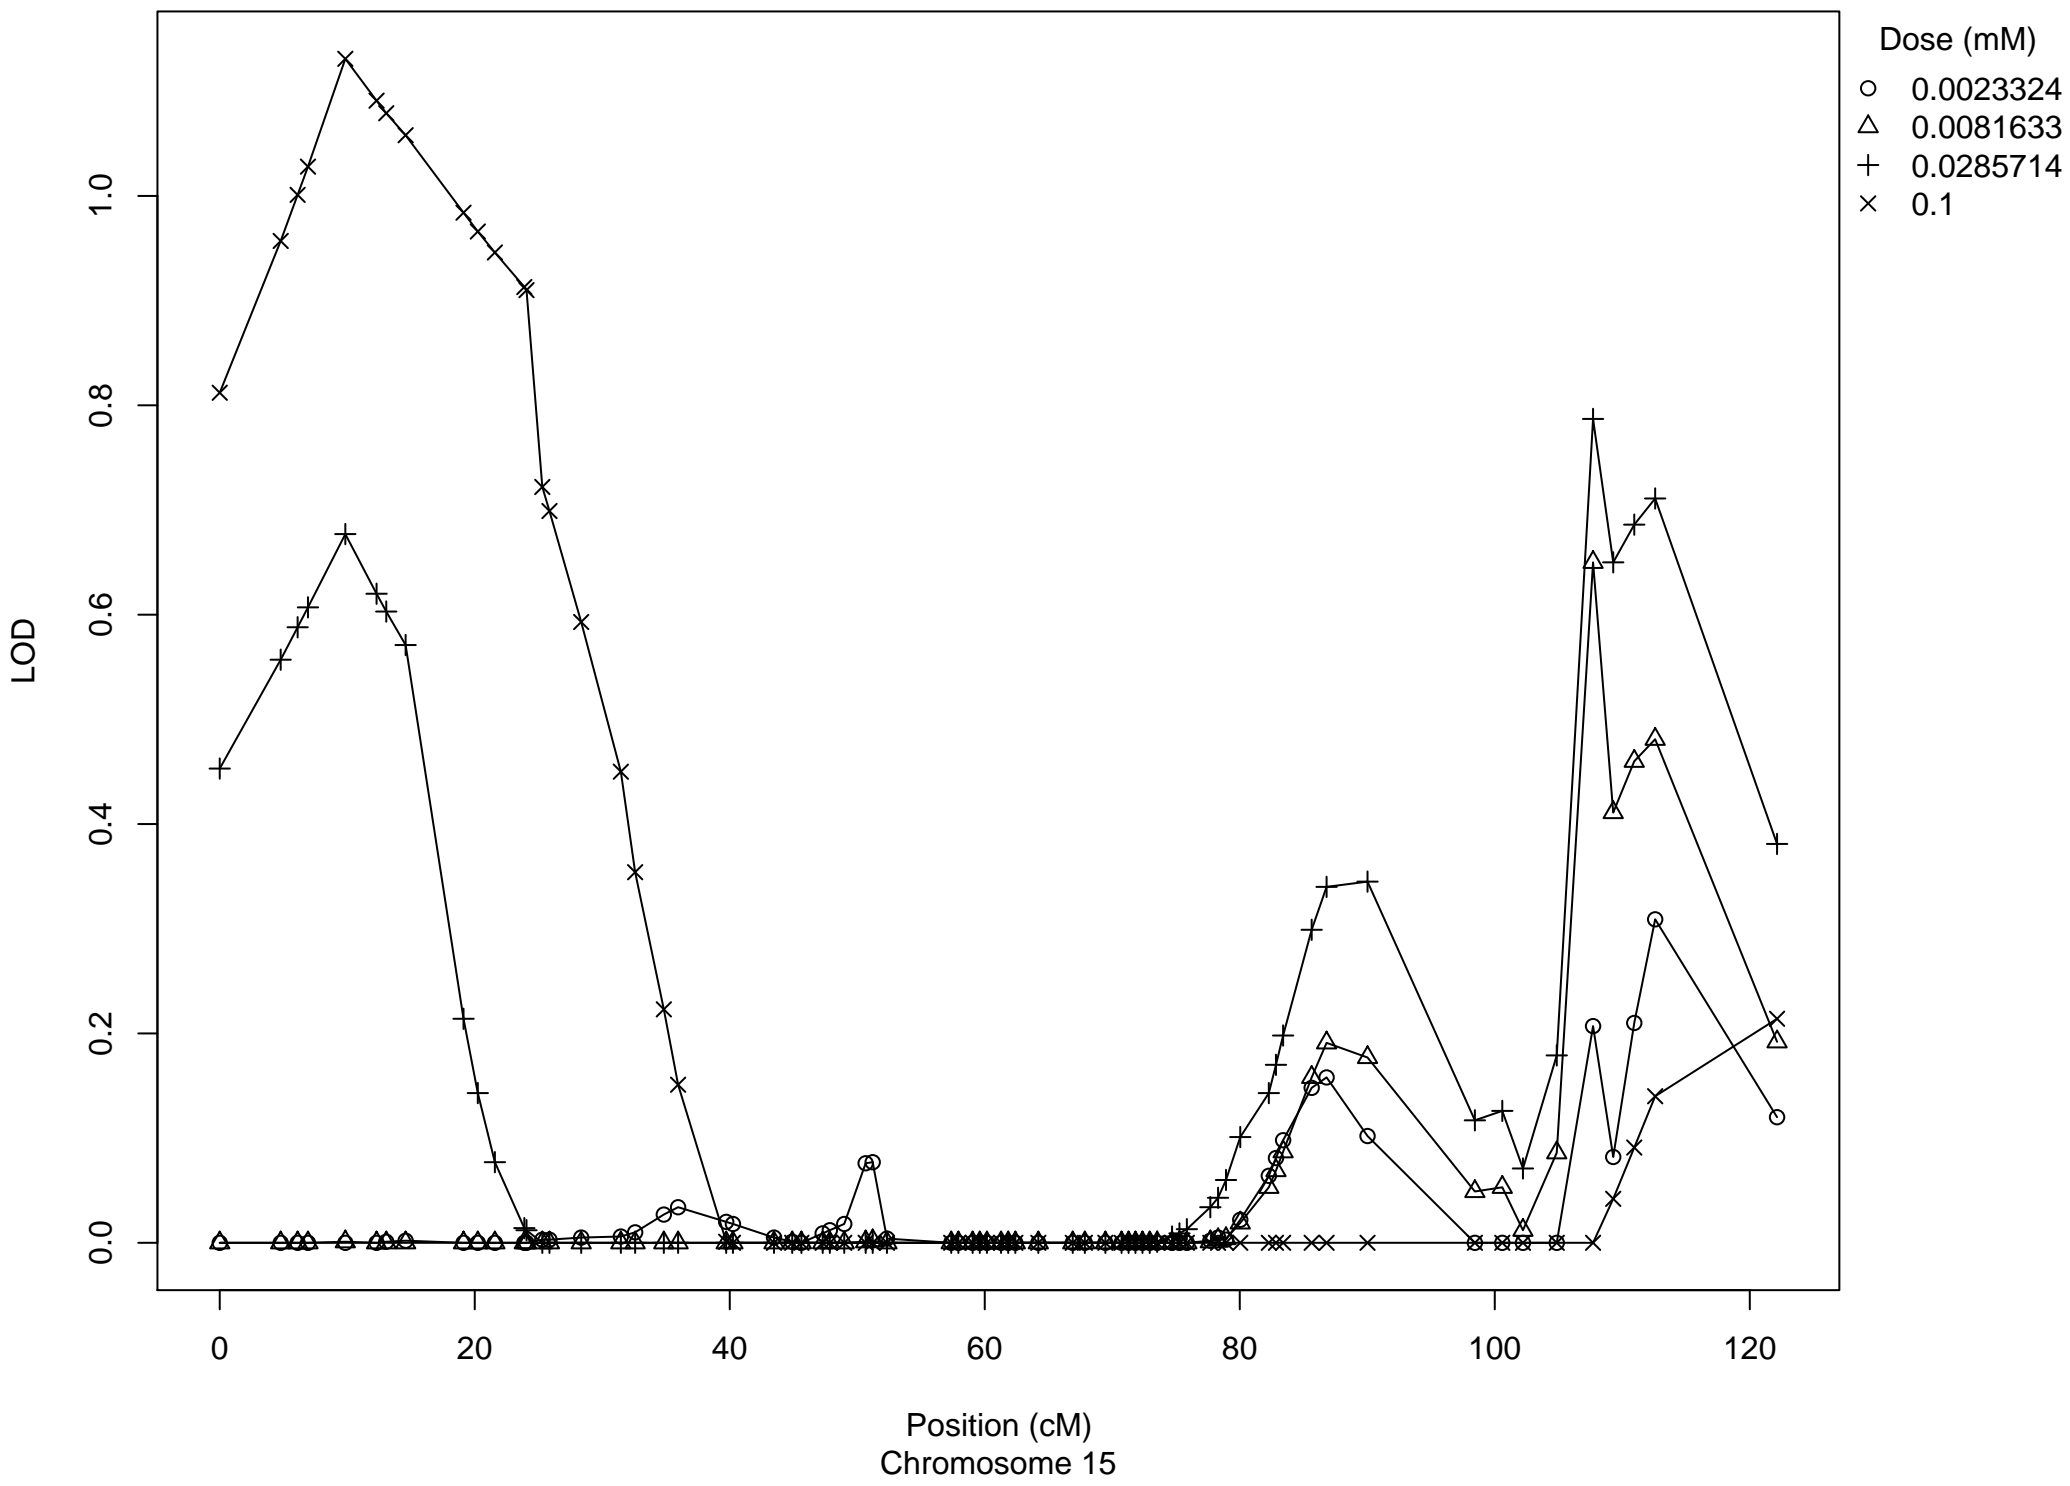

# 5-Fluoro-2-deoxyuridine (Flox)

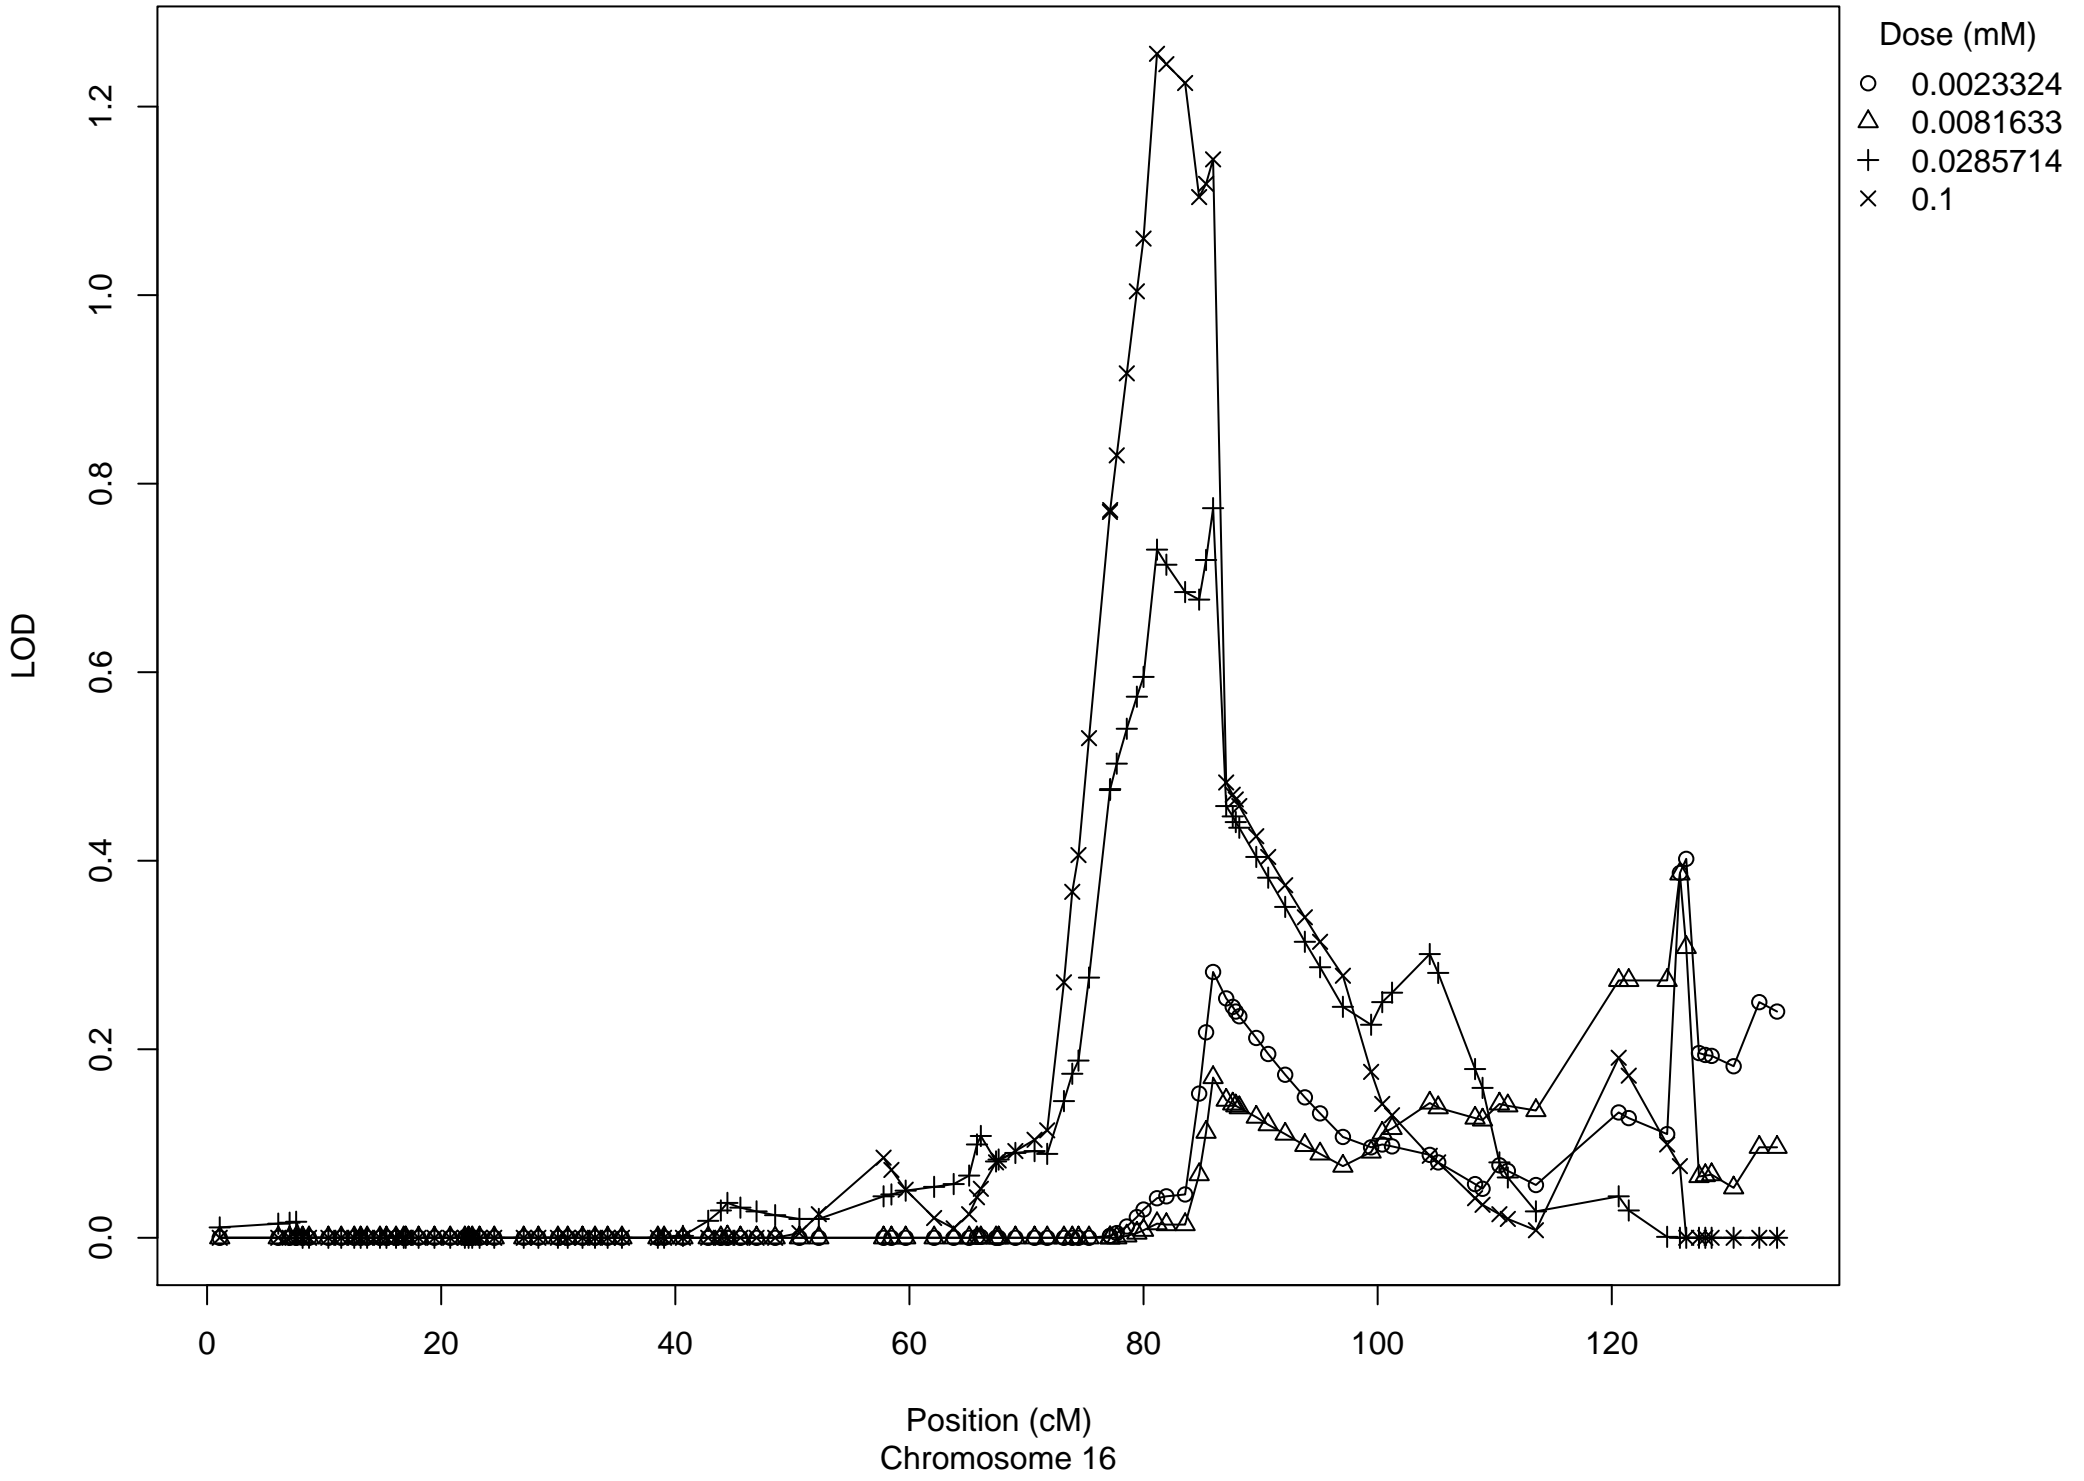

# 5-Fluoro-2-deoxyuridine (Flox)

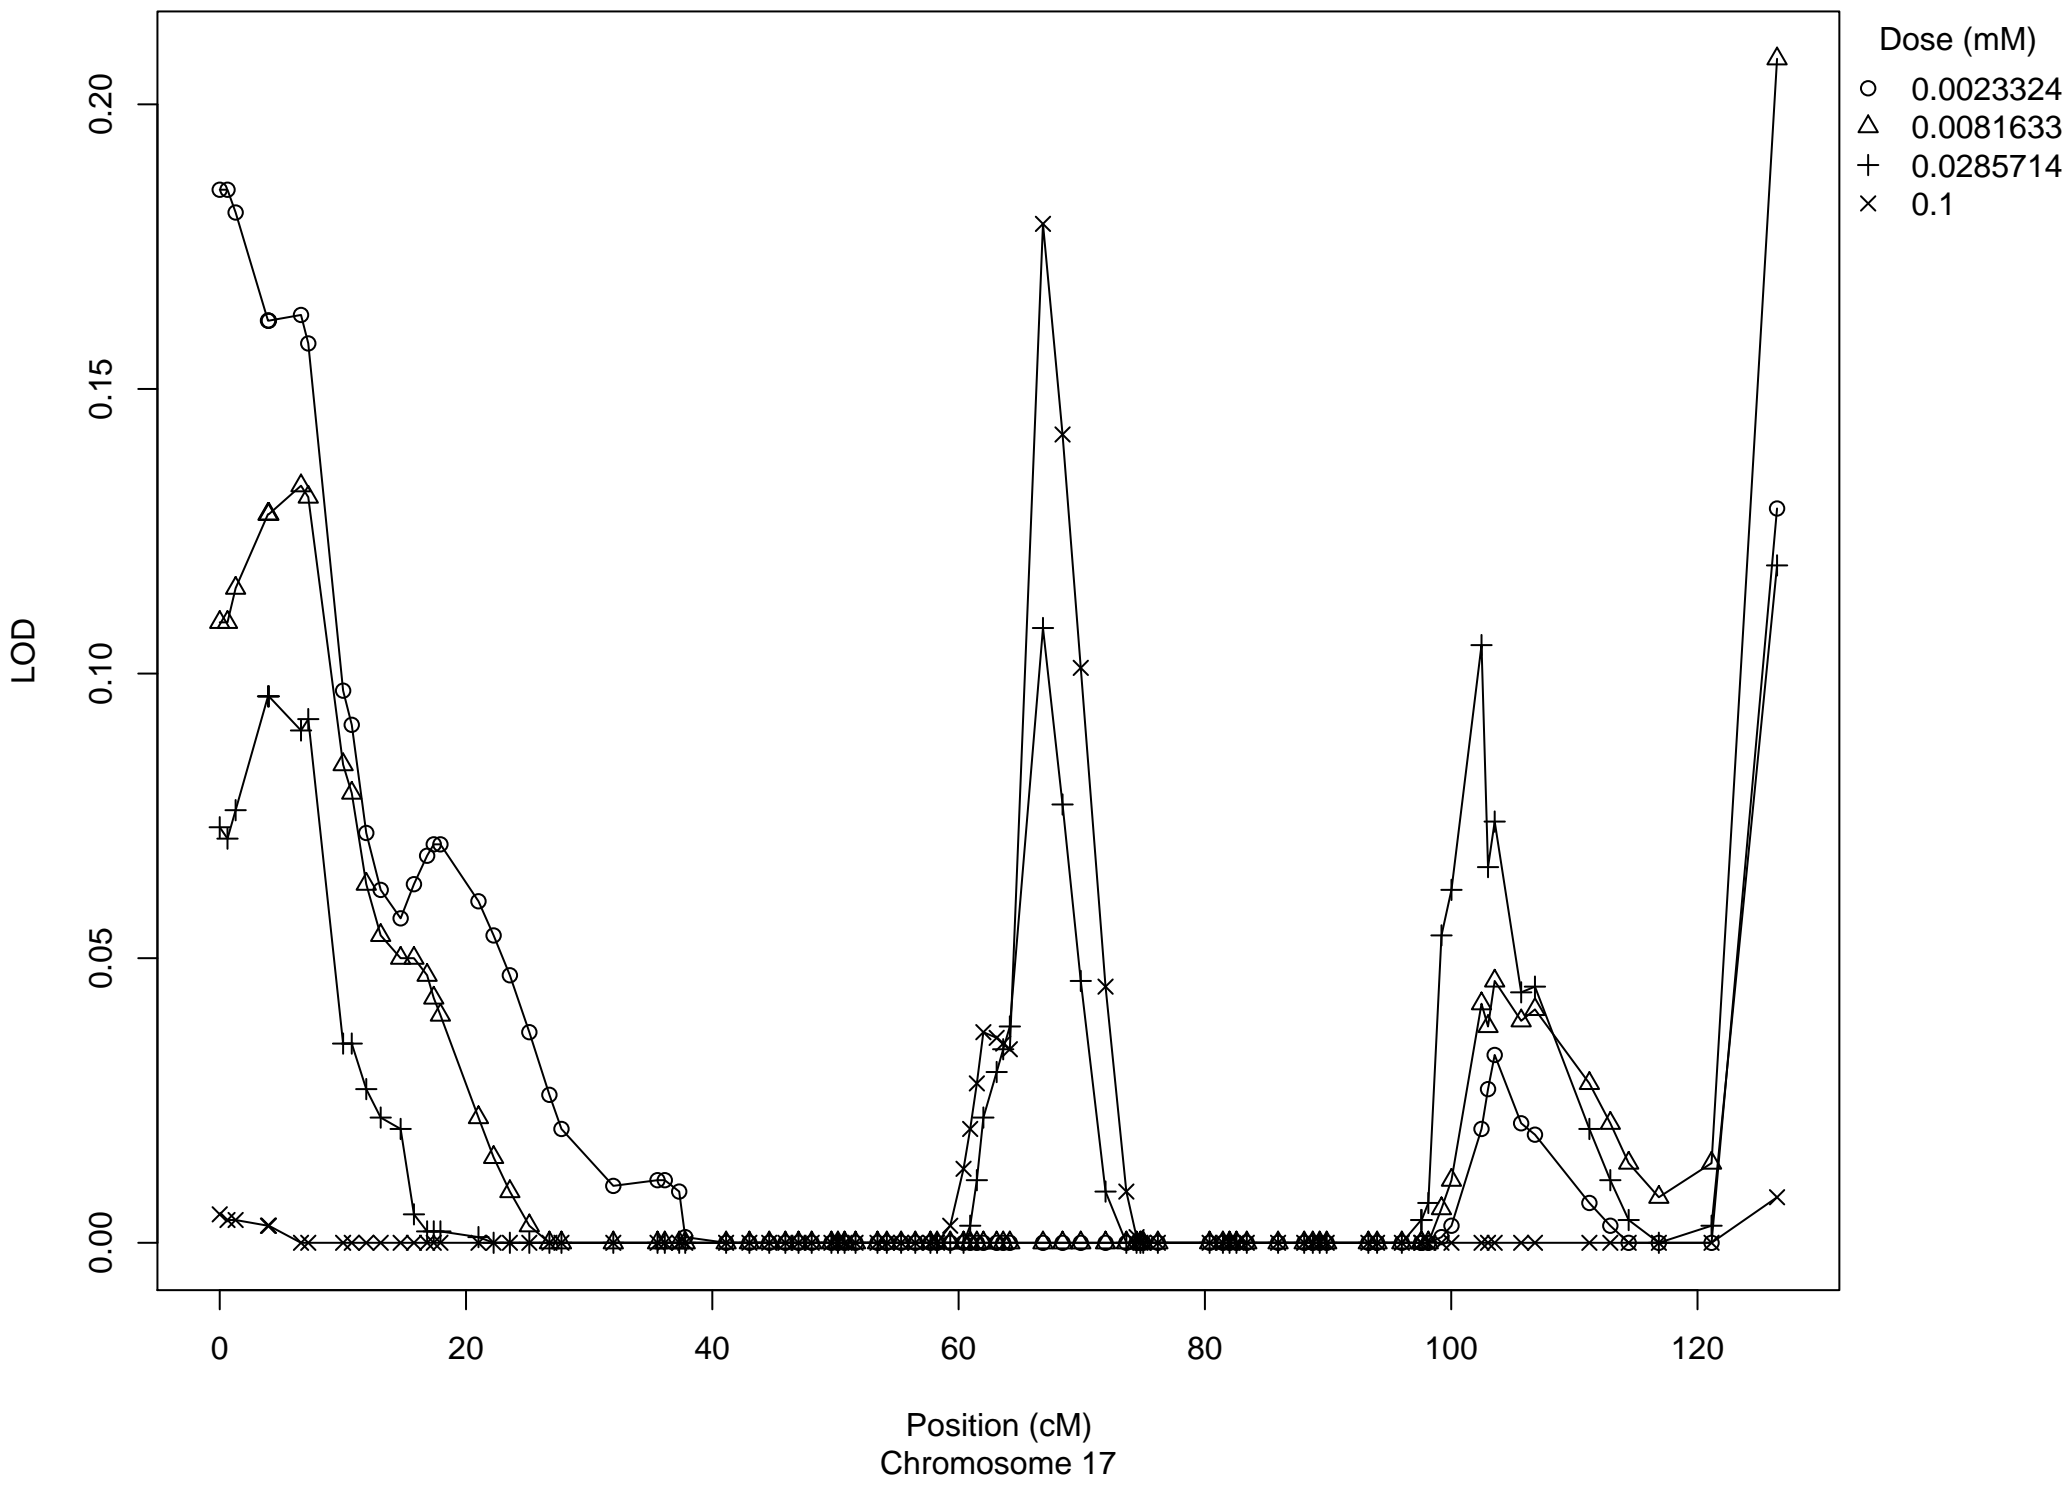

# 5-Fluoro-2-deoxyuridine (Flox)

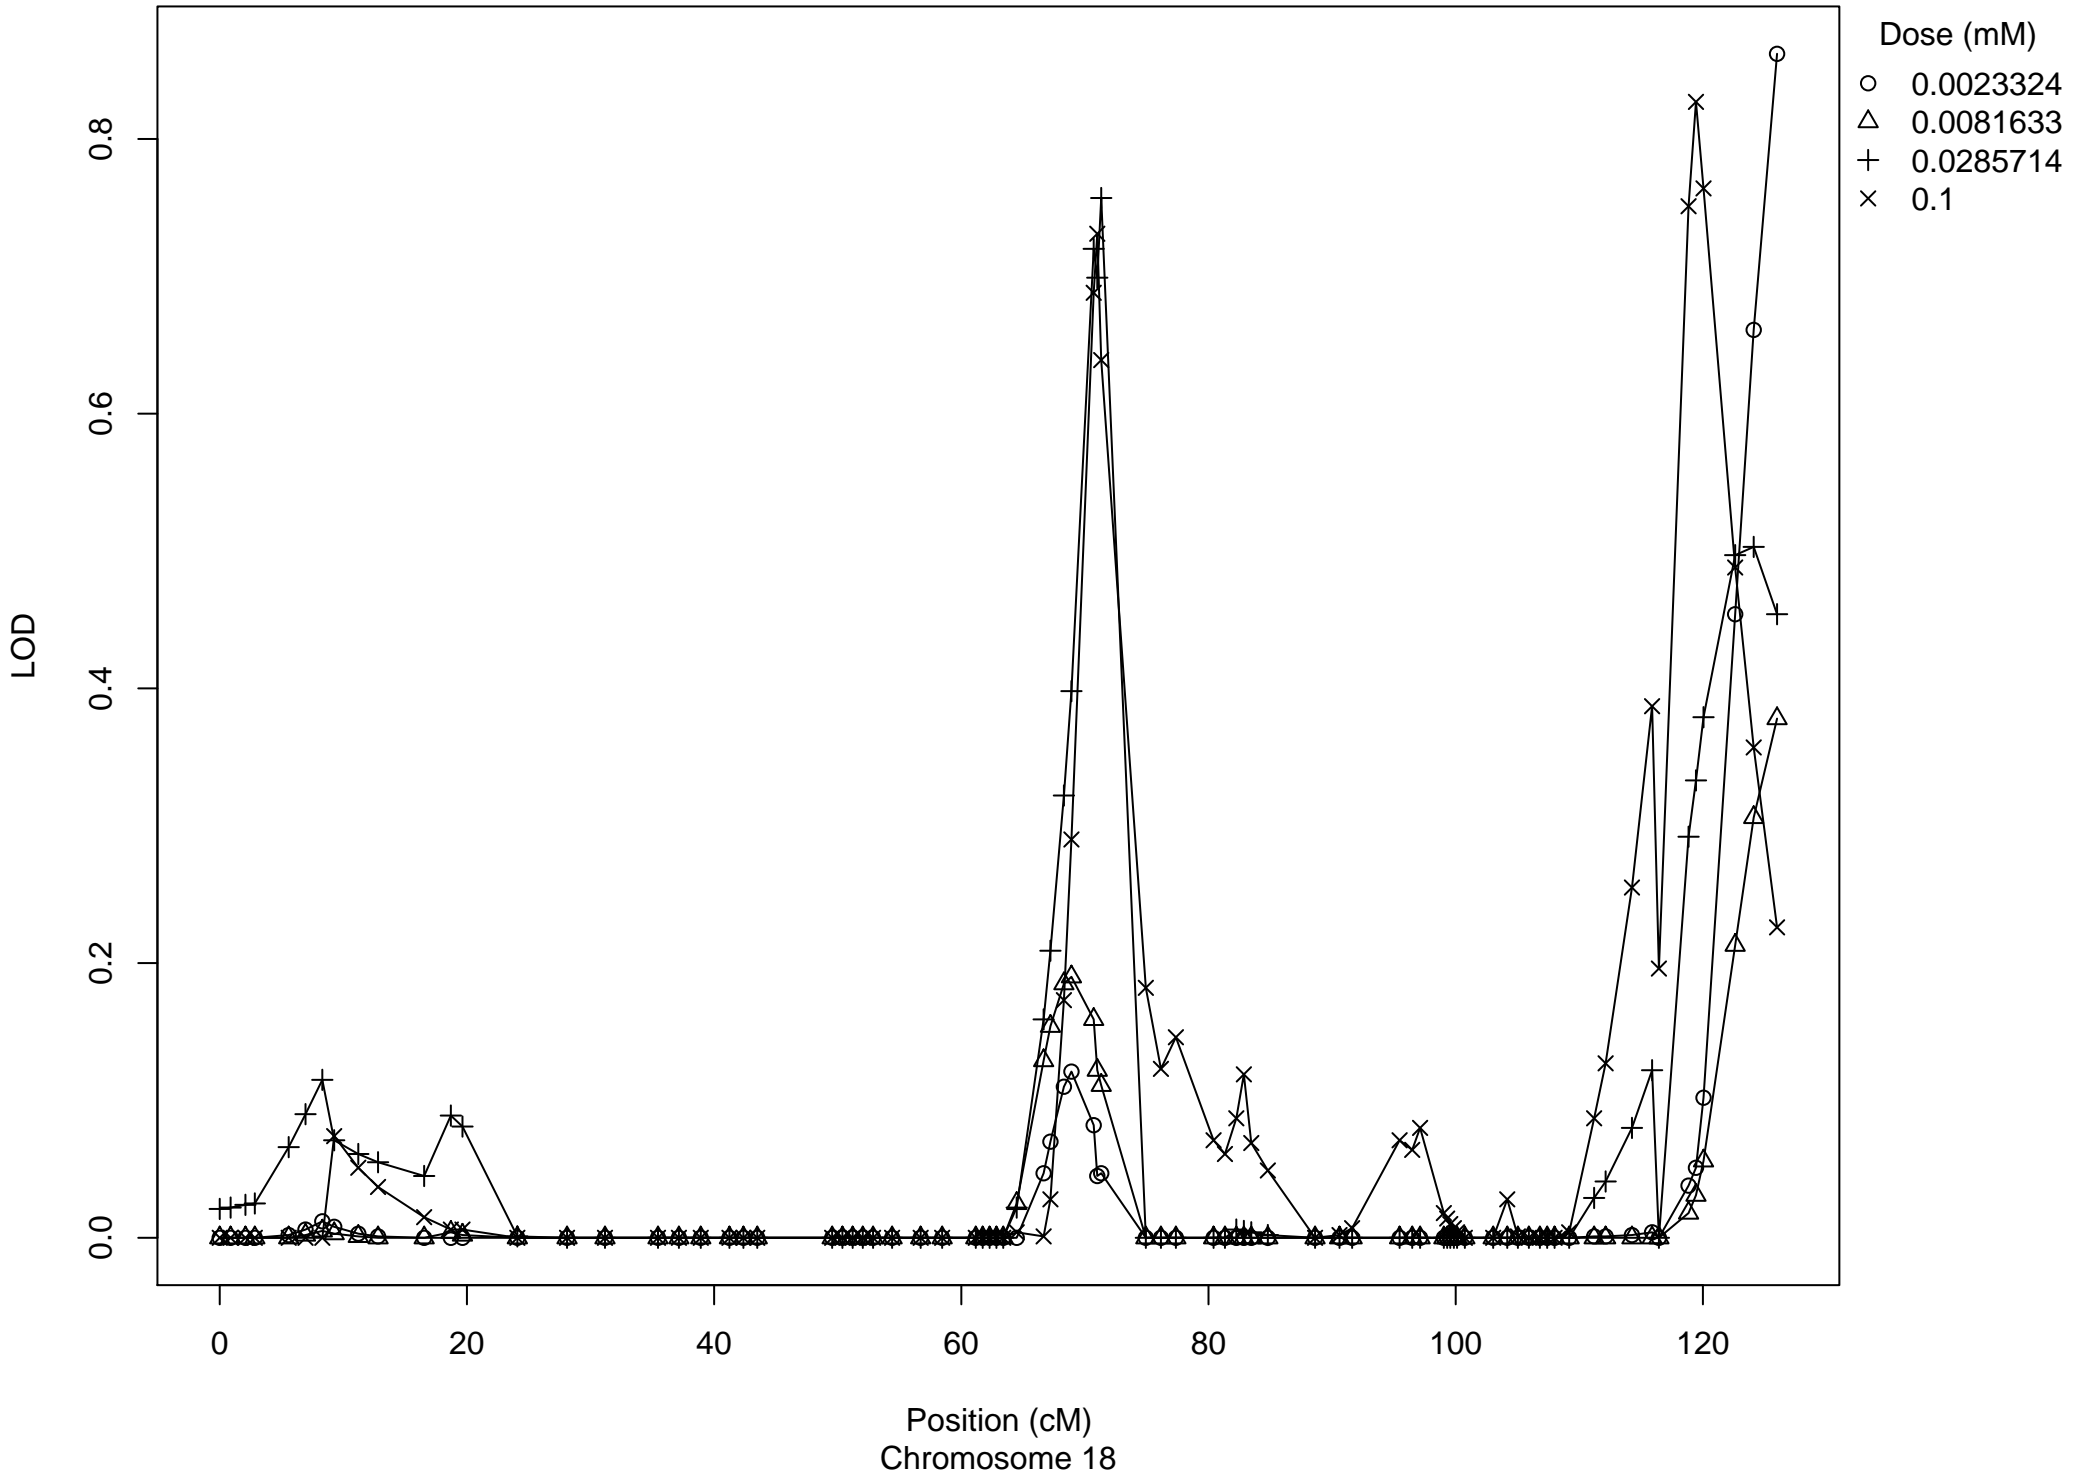

# 5-Fluoro-2-deoxyuridine (Flox)

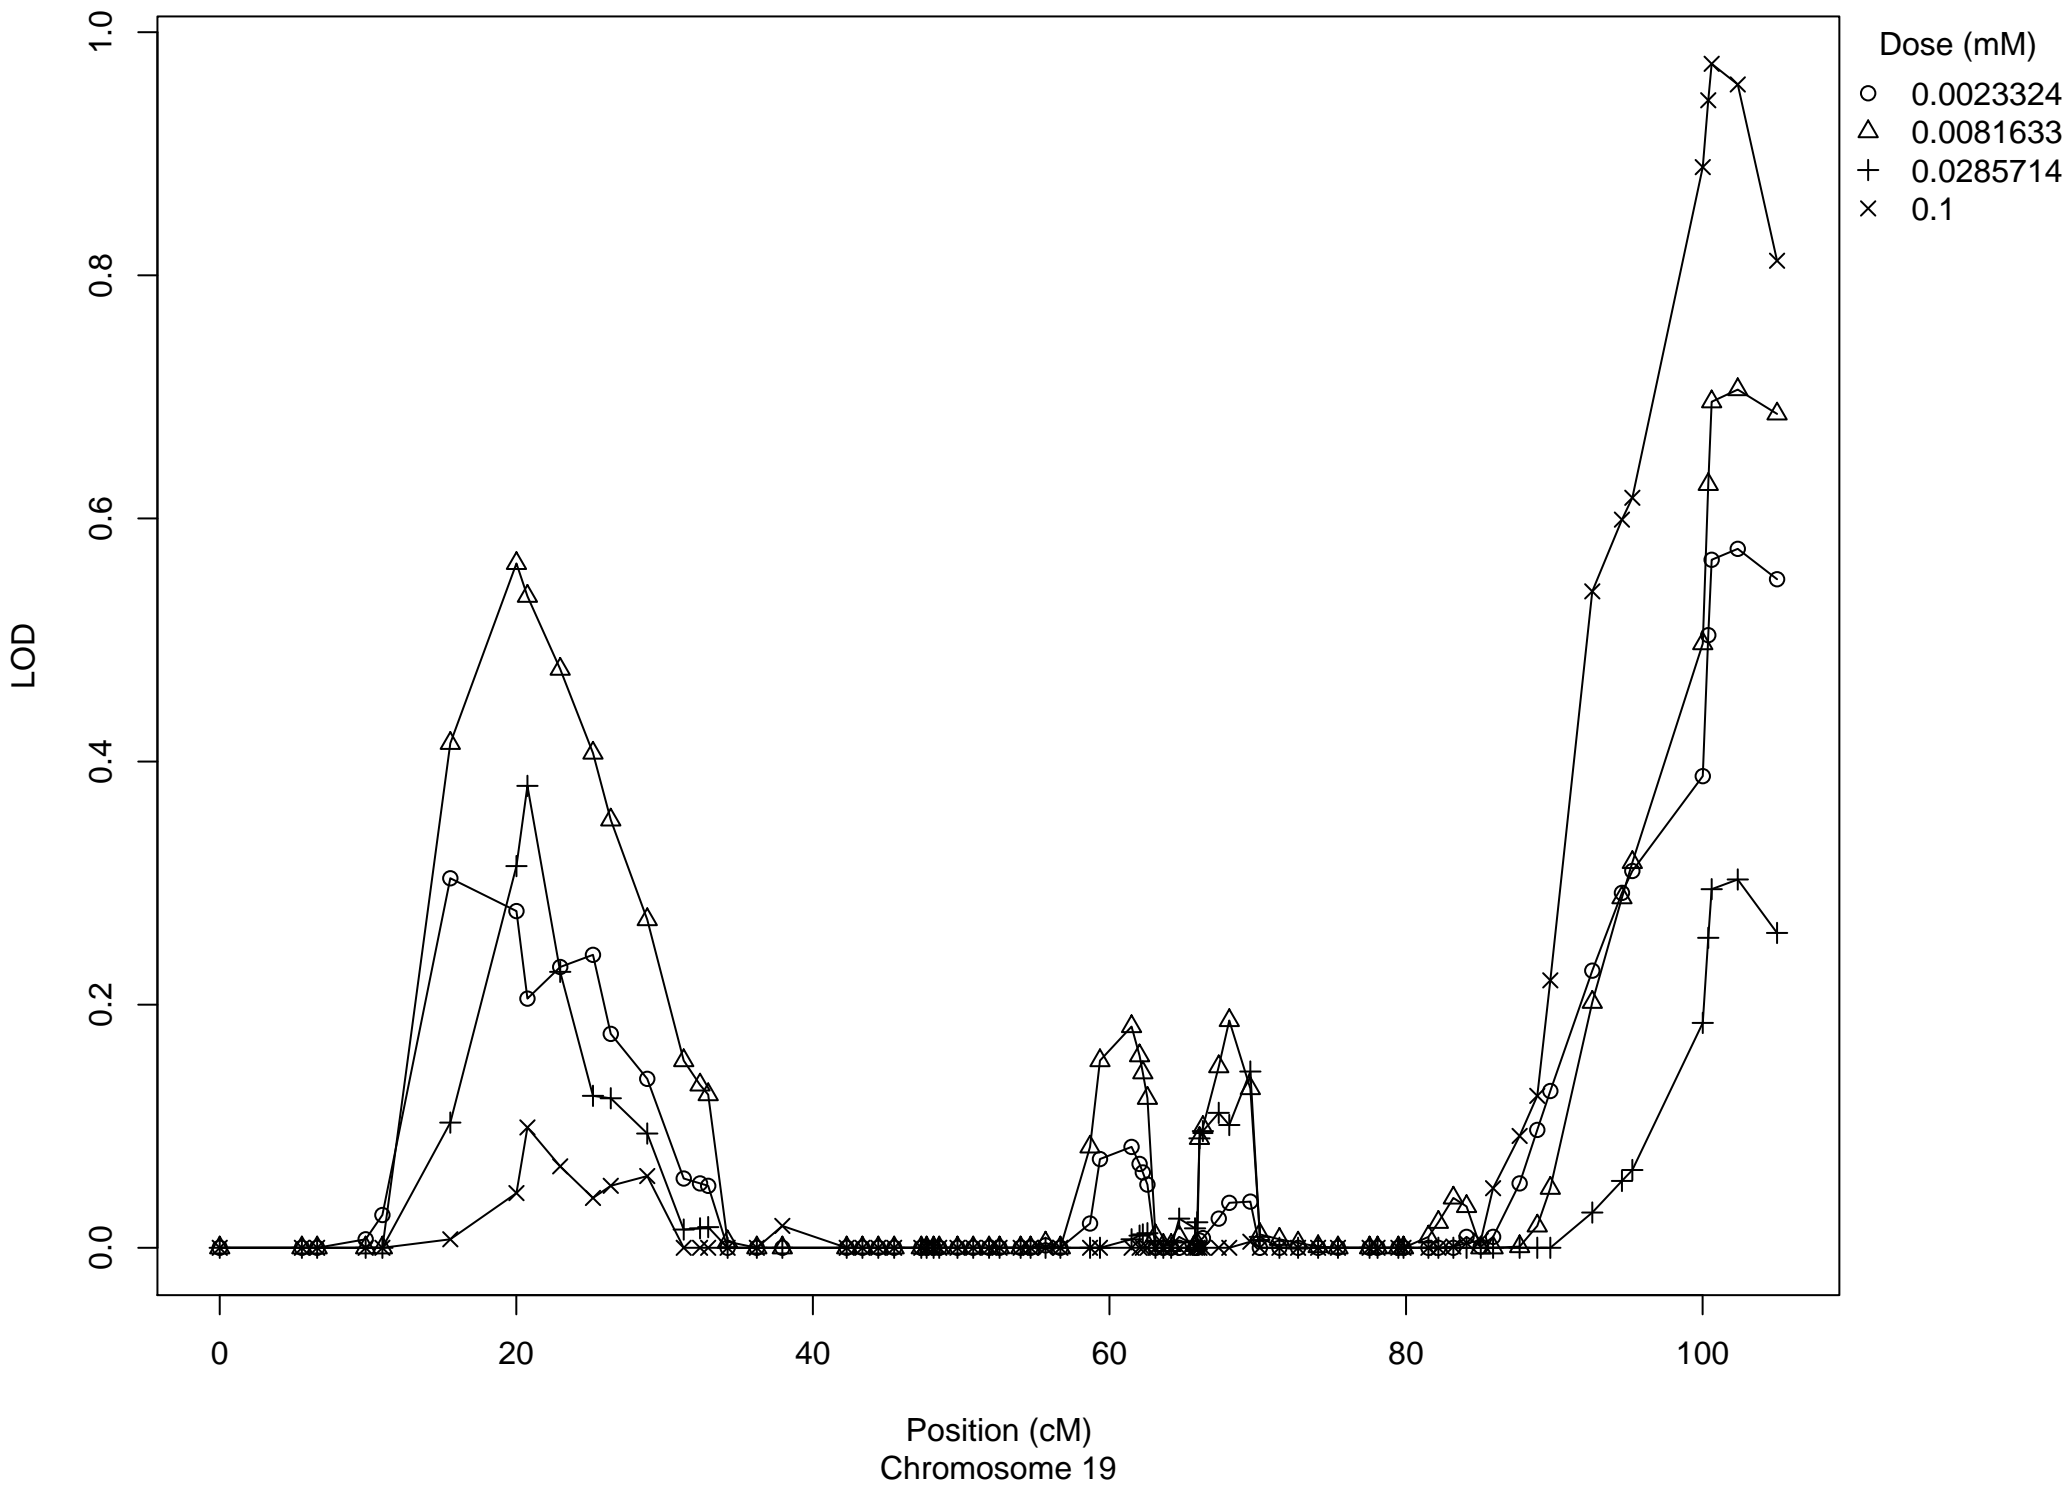

# 5-Fluoro-2-deoxyuridine (Flox)

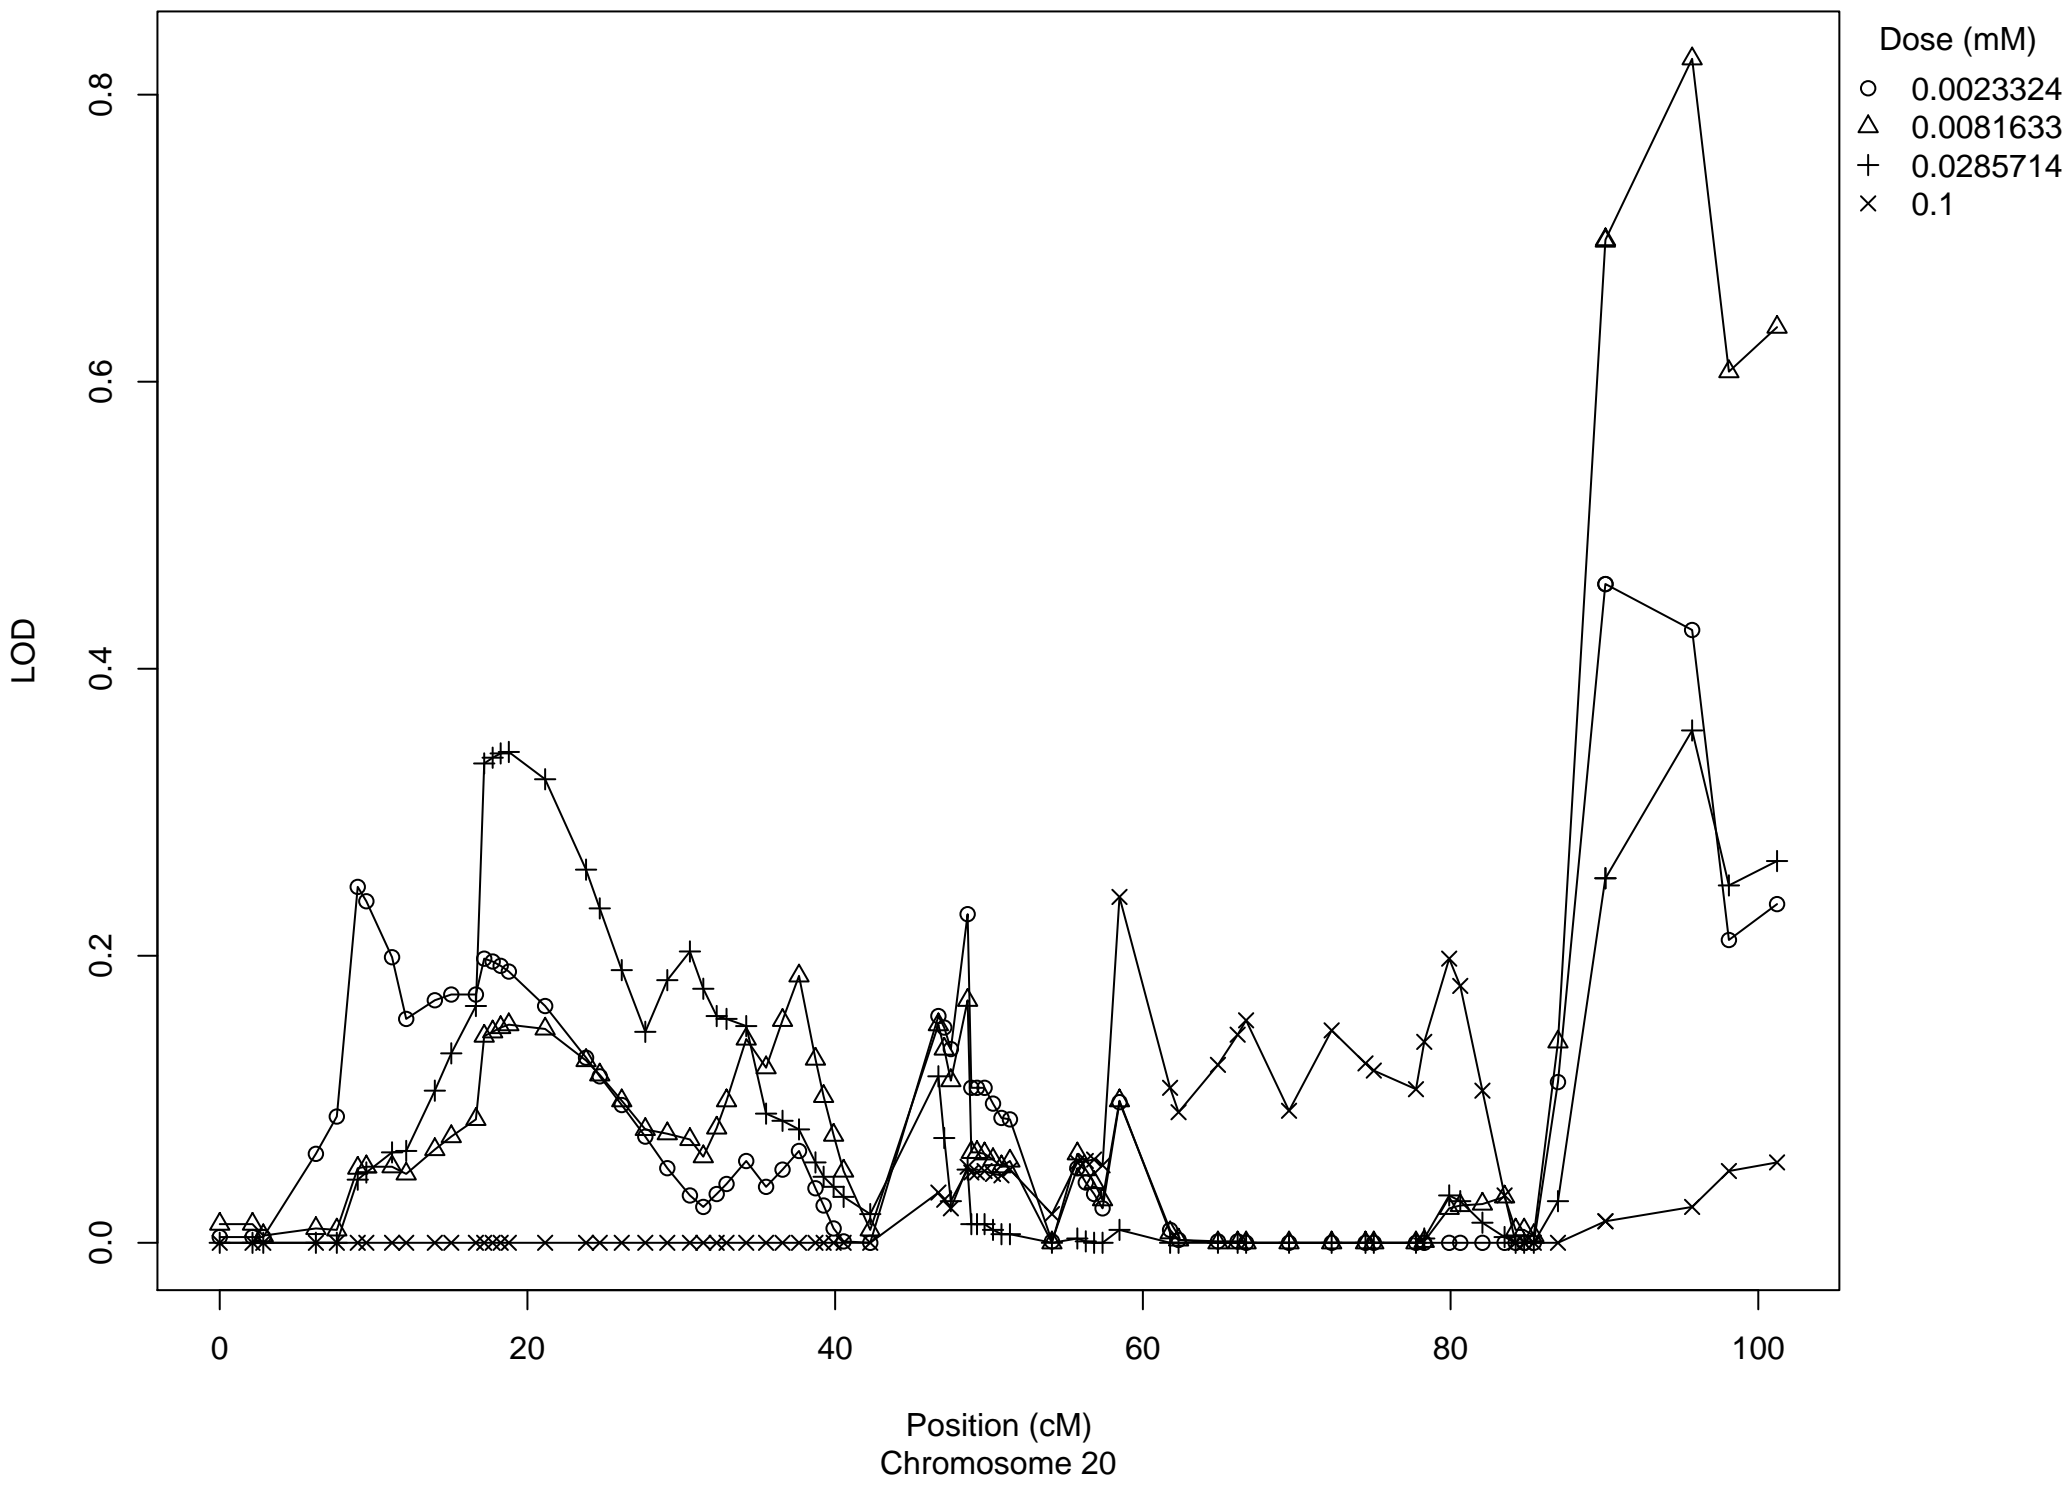

# 5-Fluoro-2-deoxyuridine (Flox)

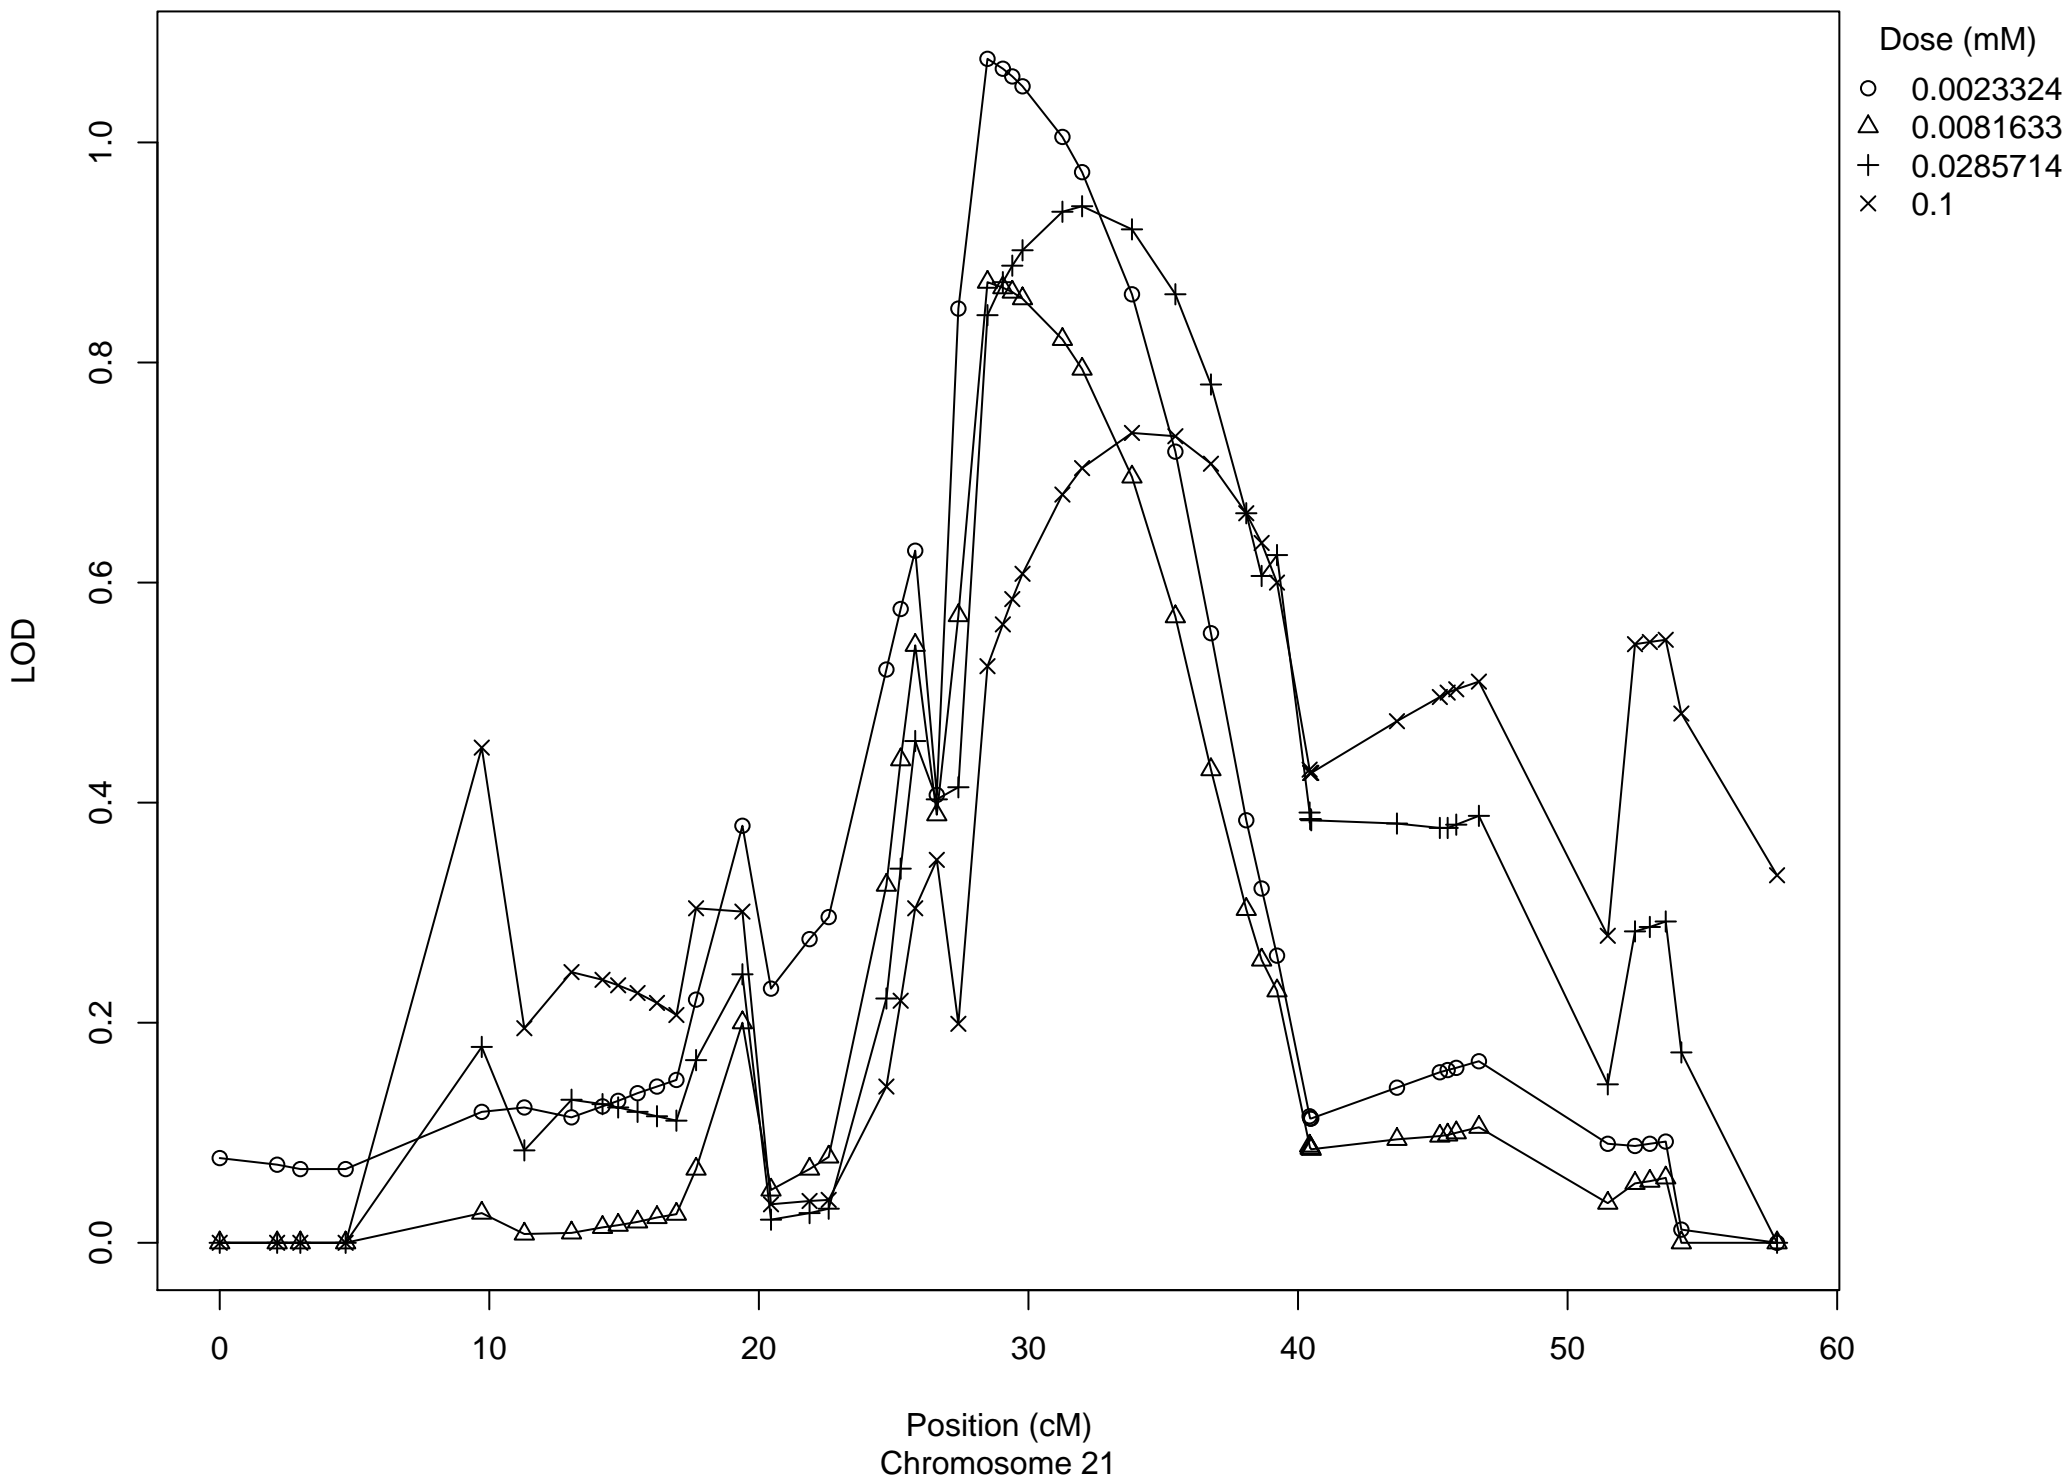

# 5-Fluoro-2-deoxyuridine (Flox)

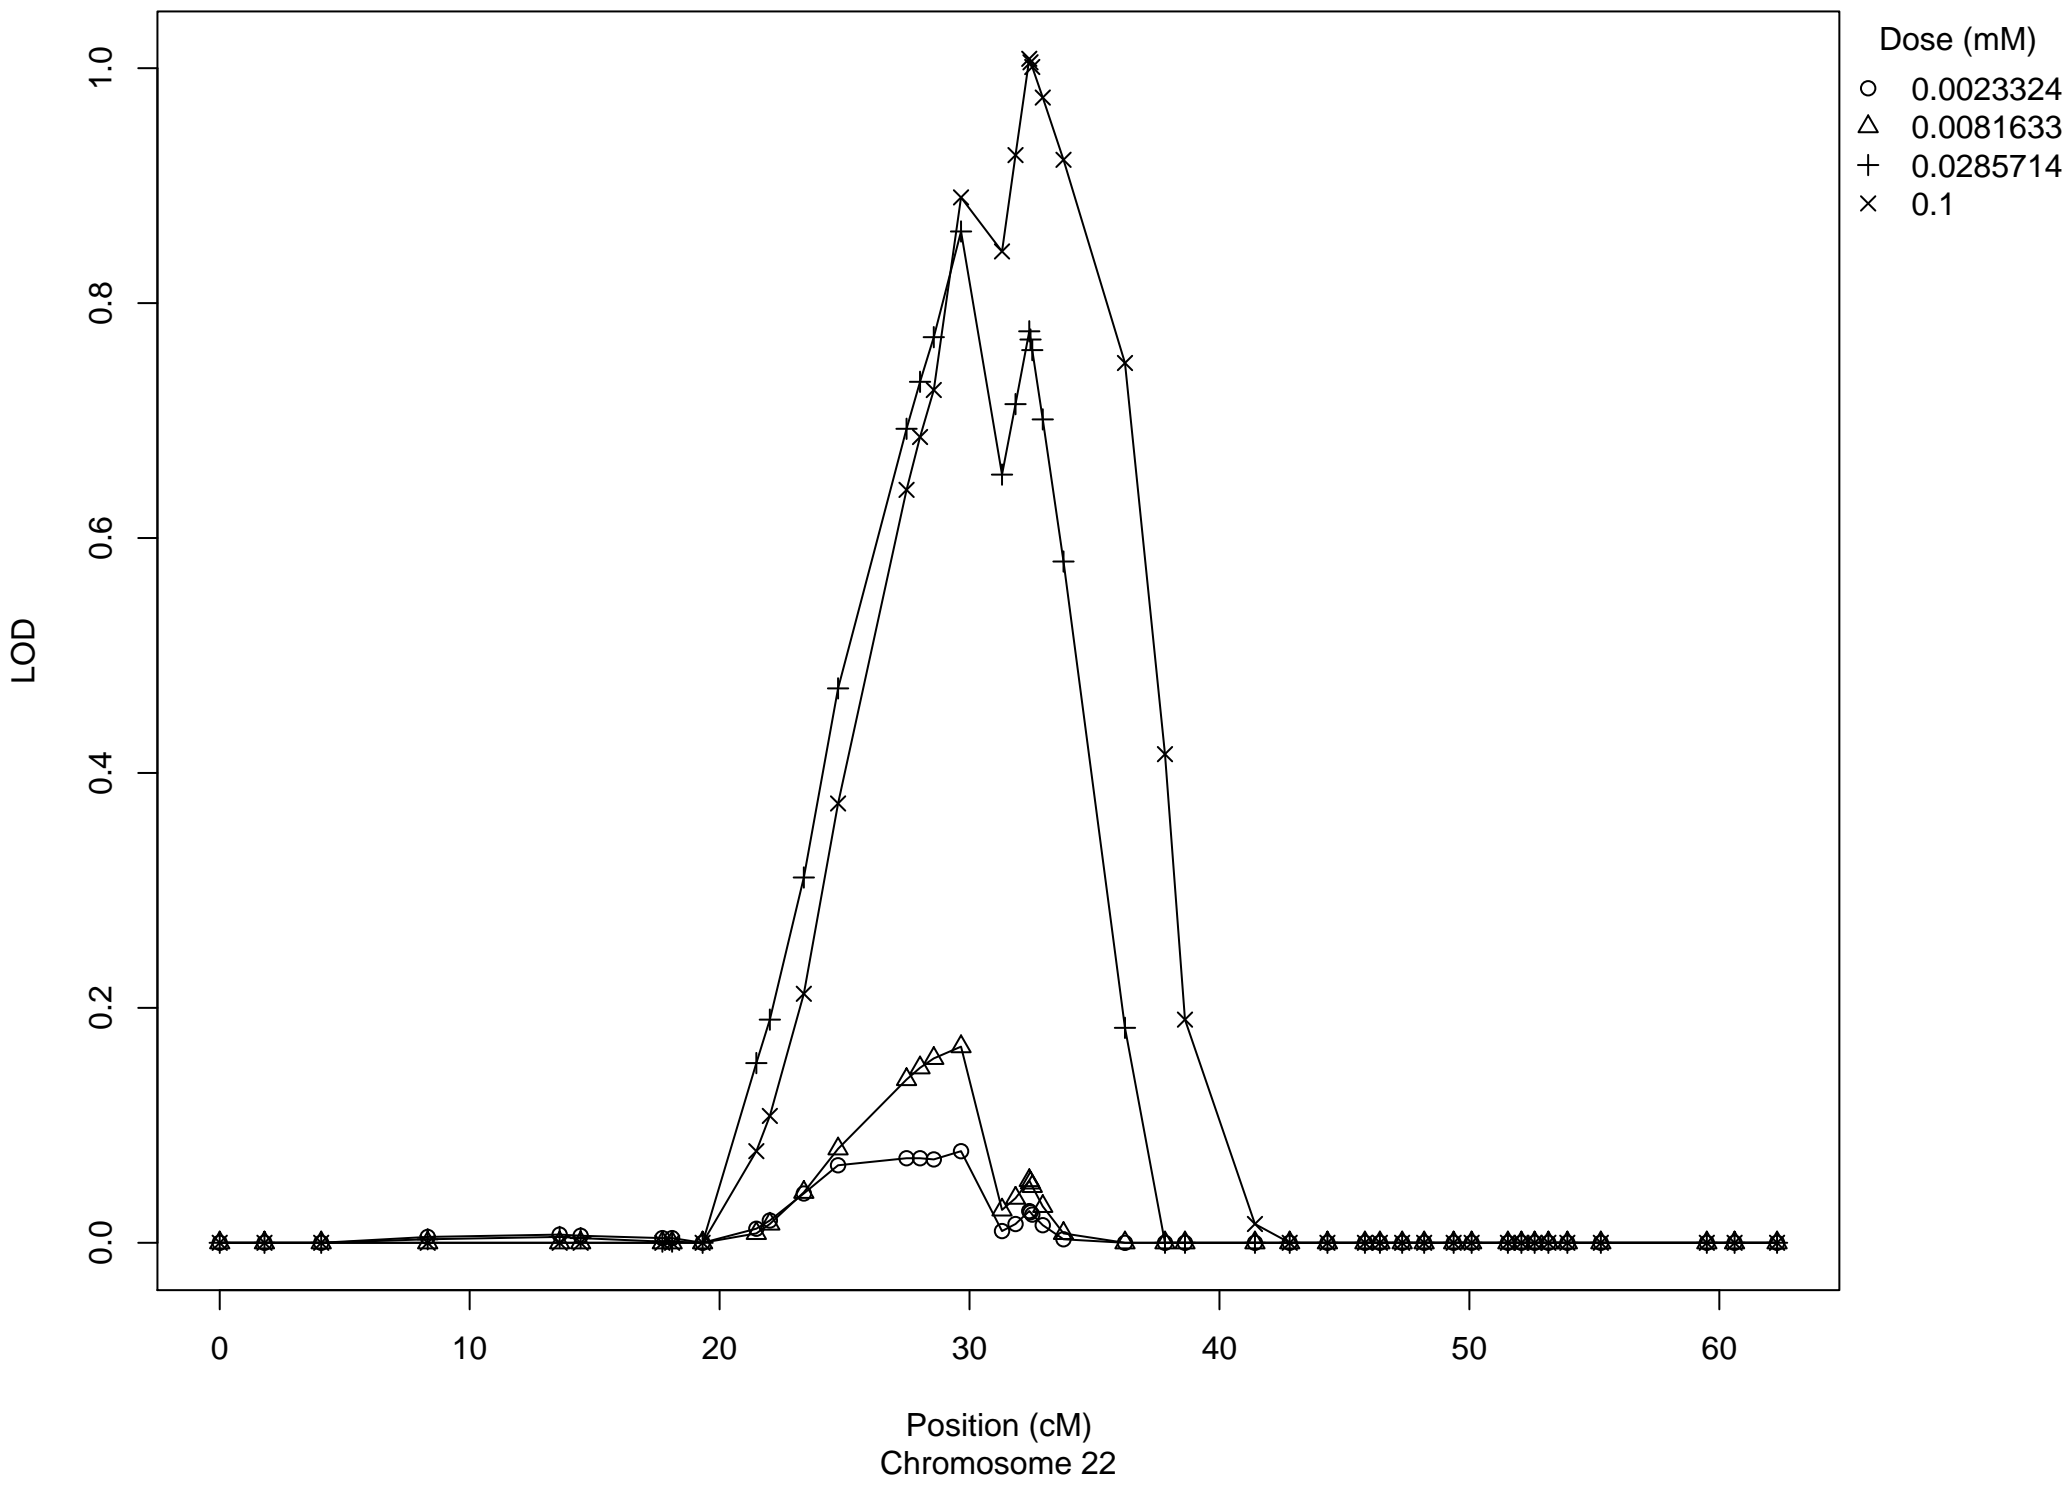



# 5-Fluorouracil (5FU)

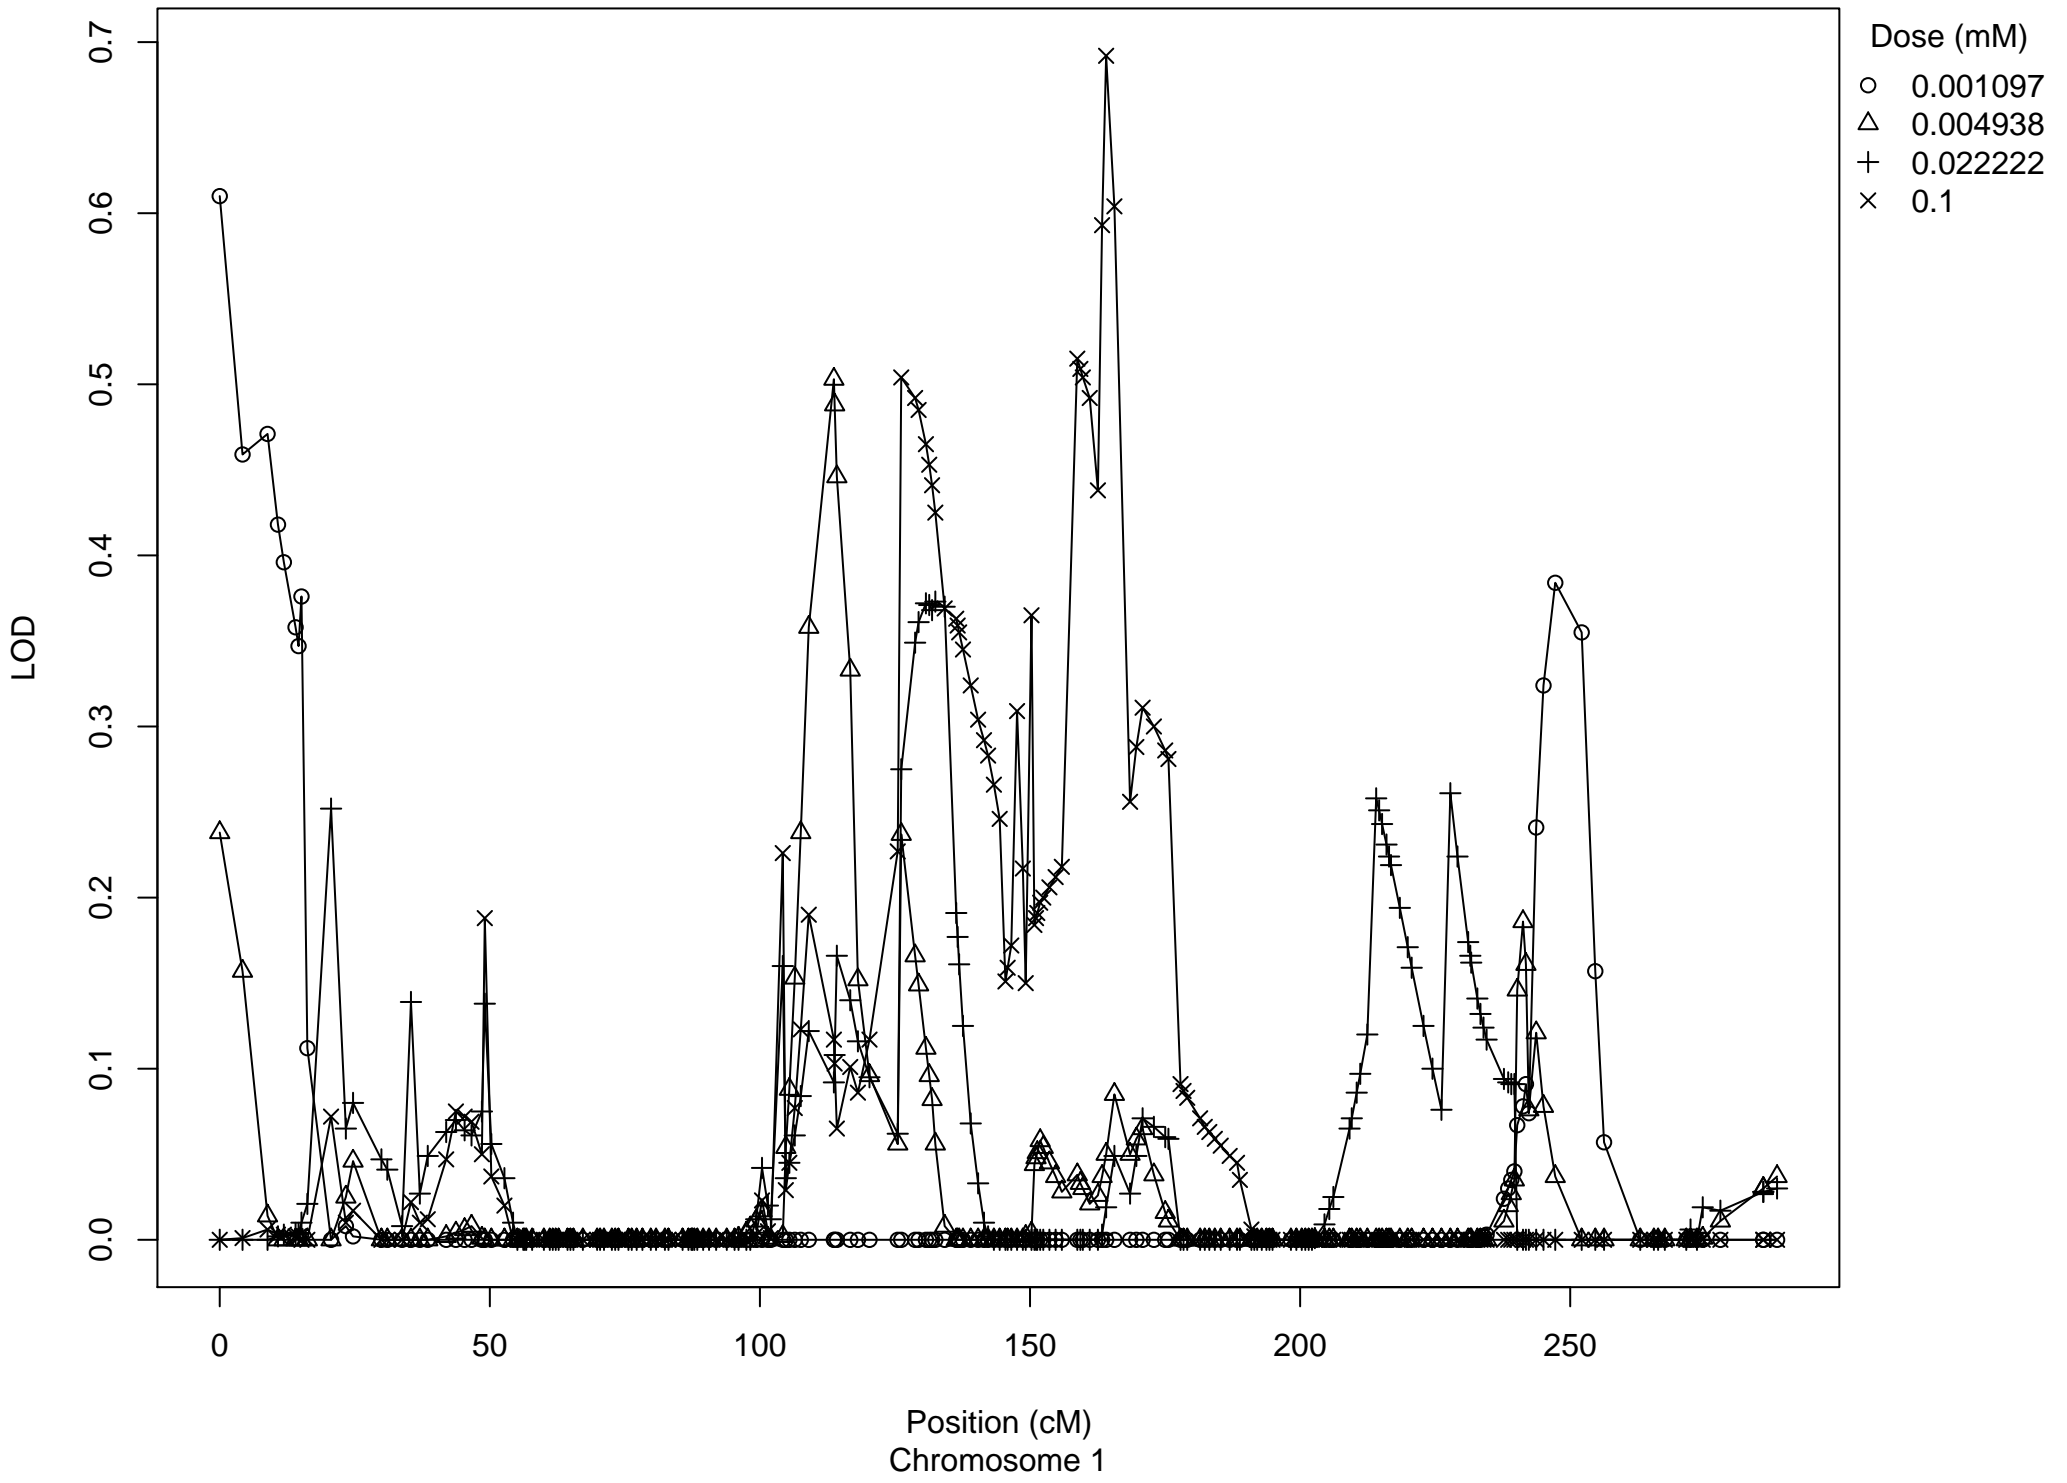

# 5-Fluorouracil (5FU)

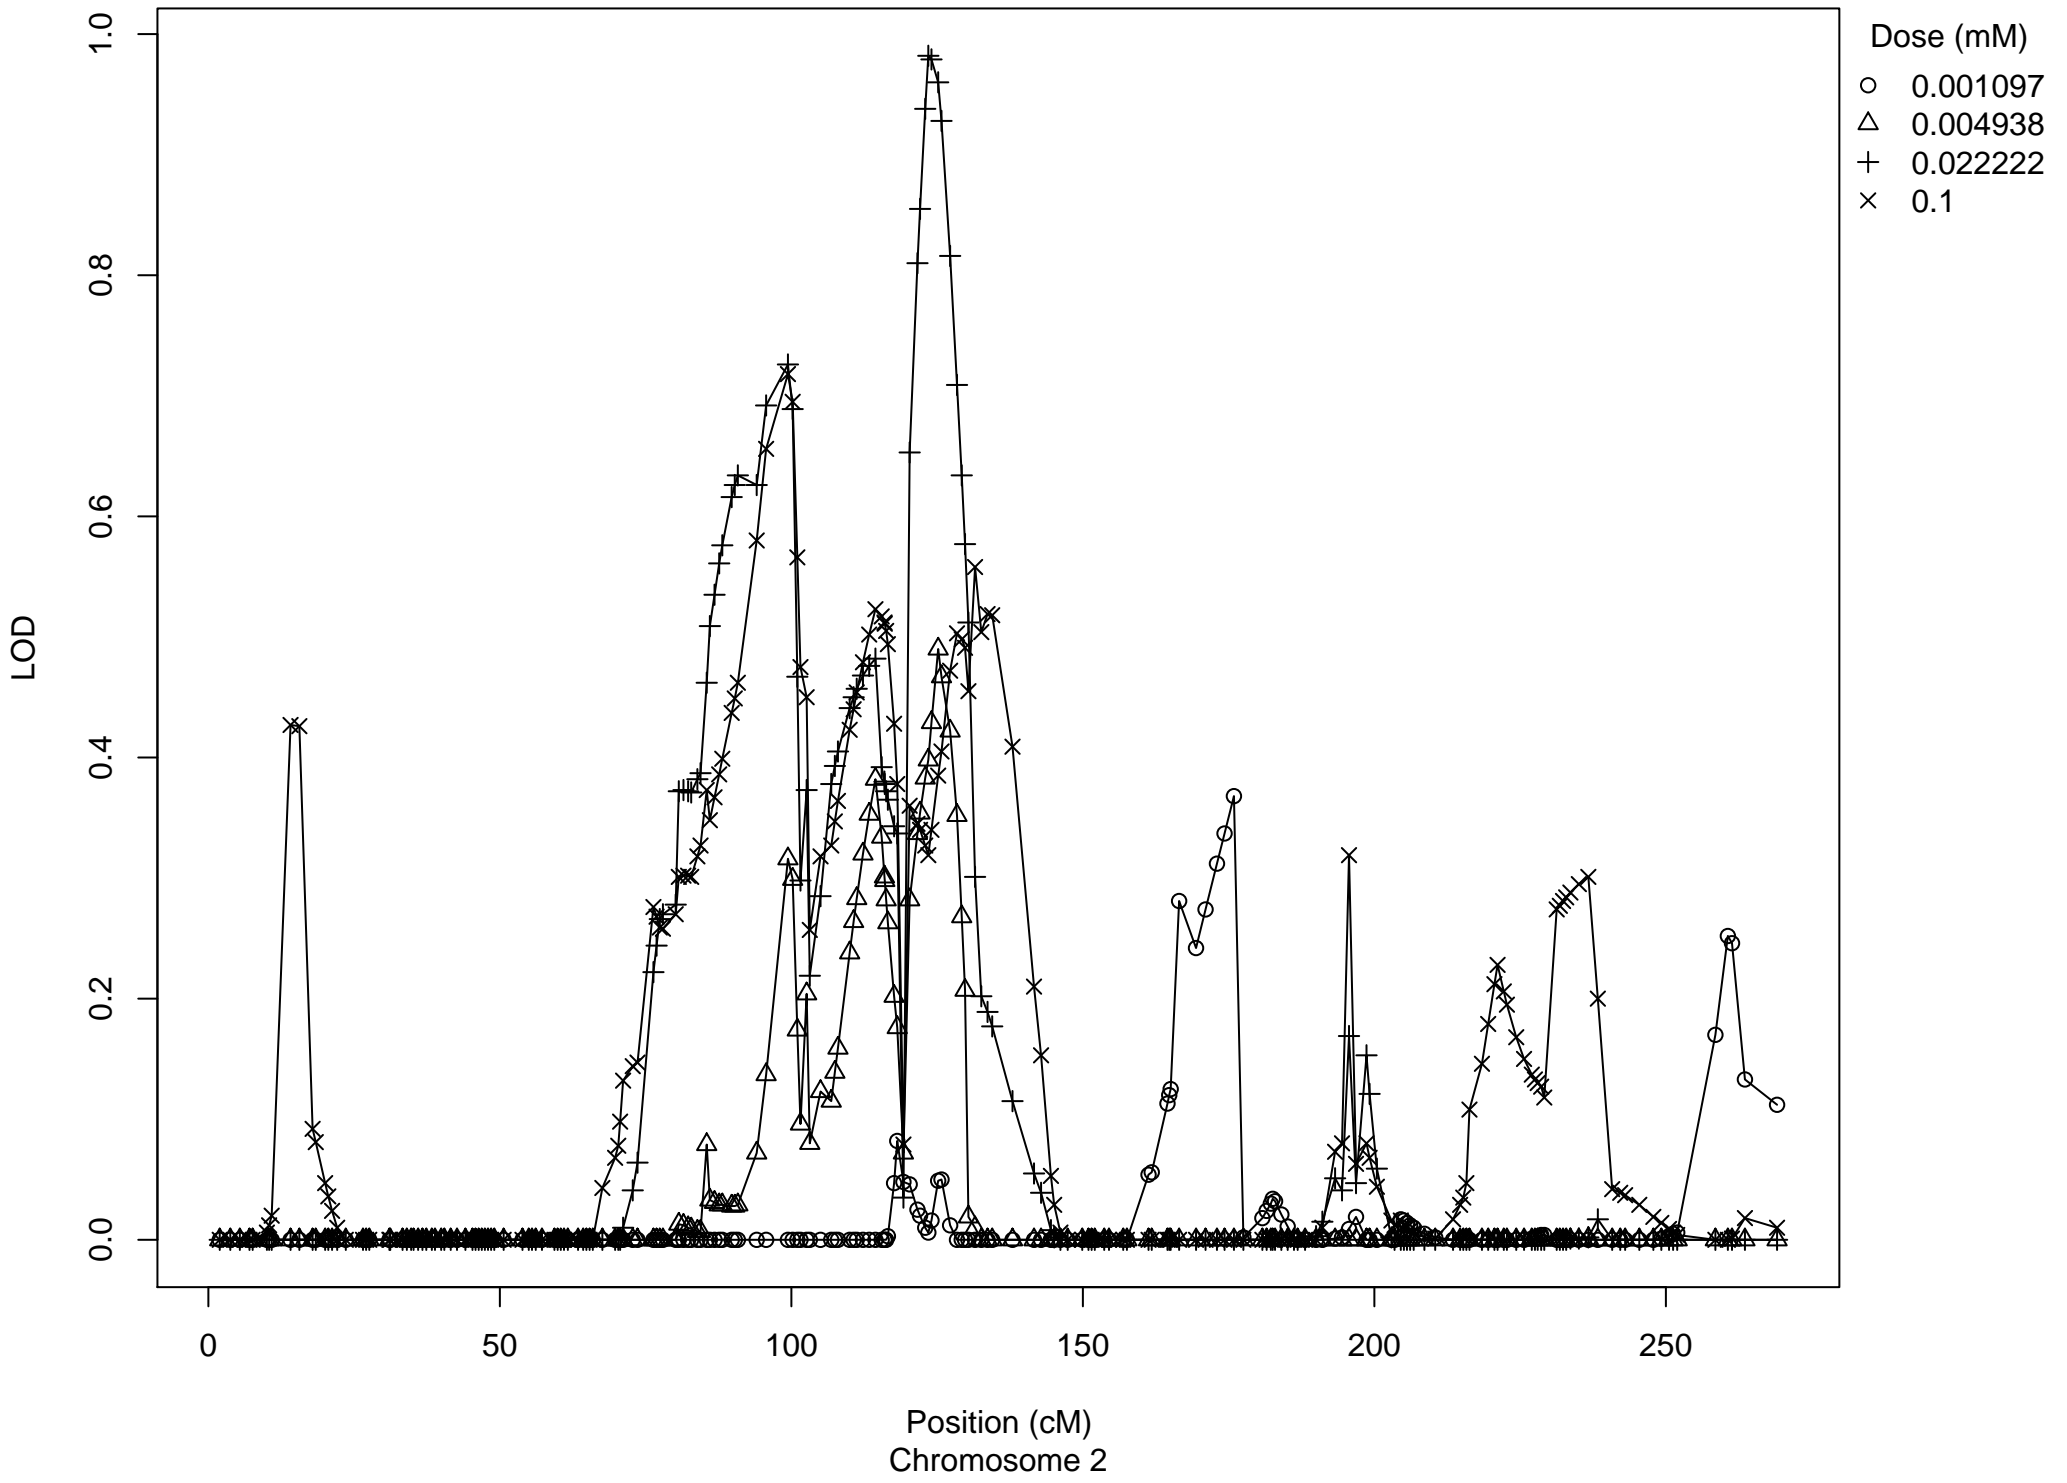

# 5-Fluorouracil (5FU)

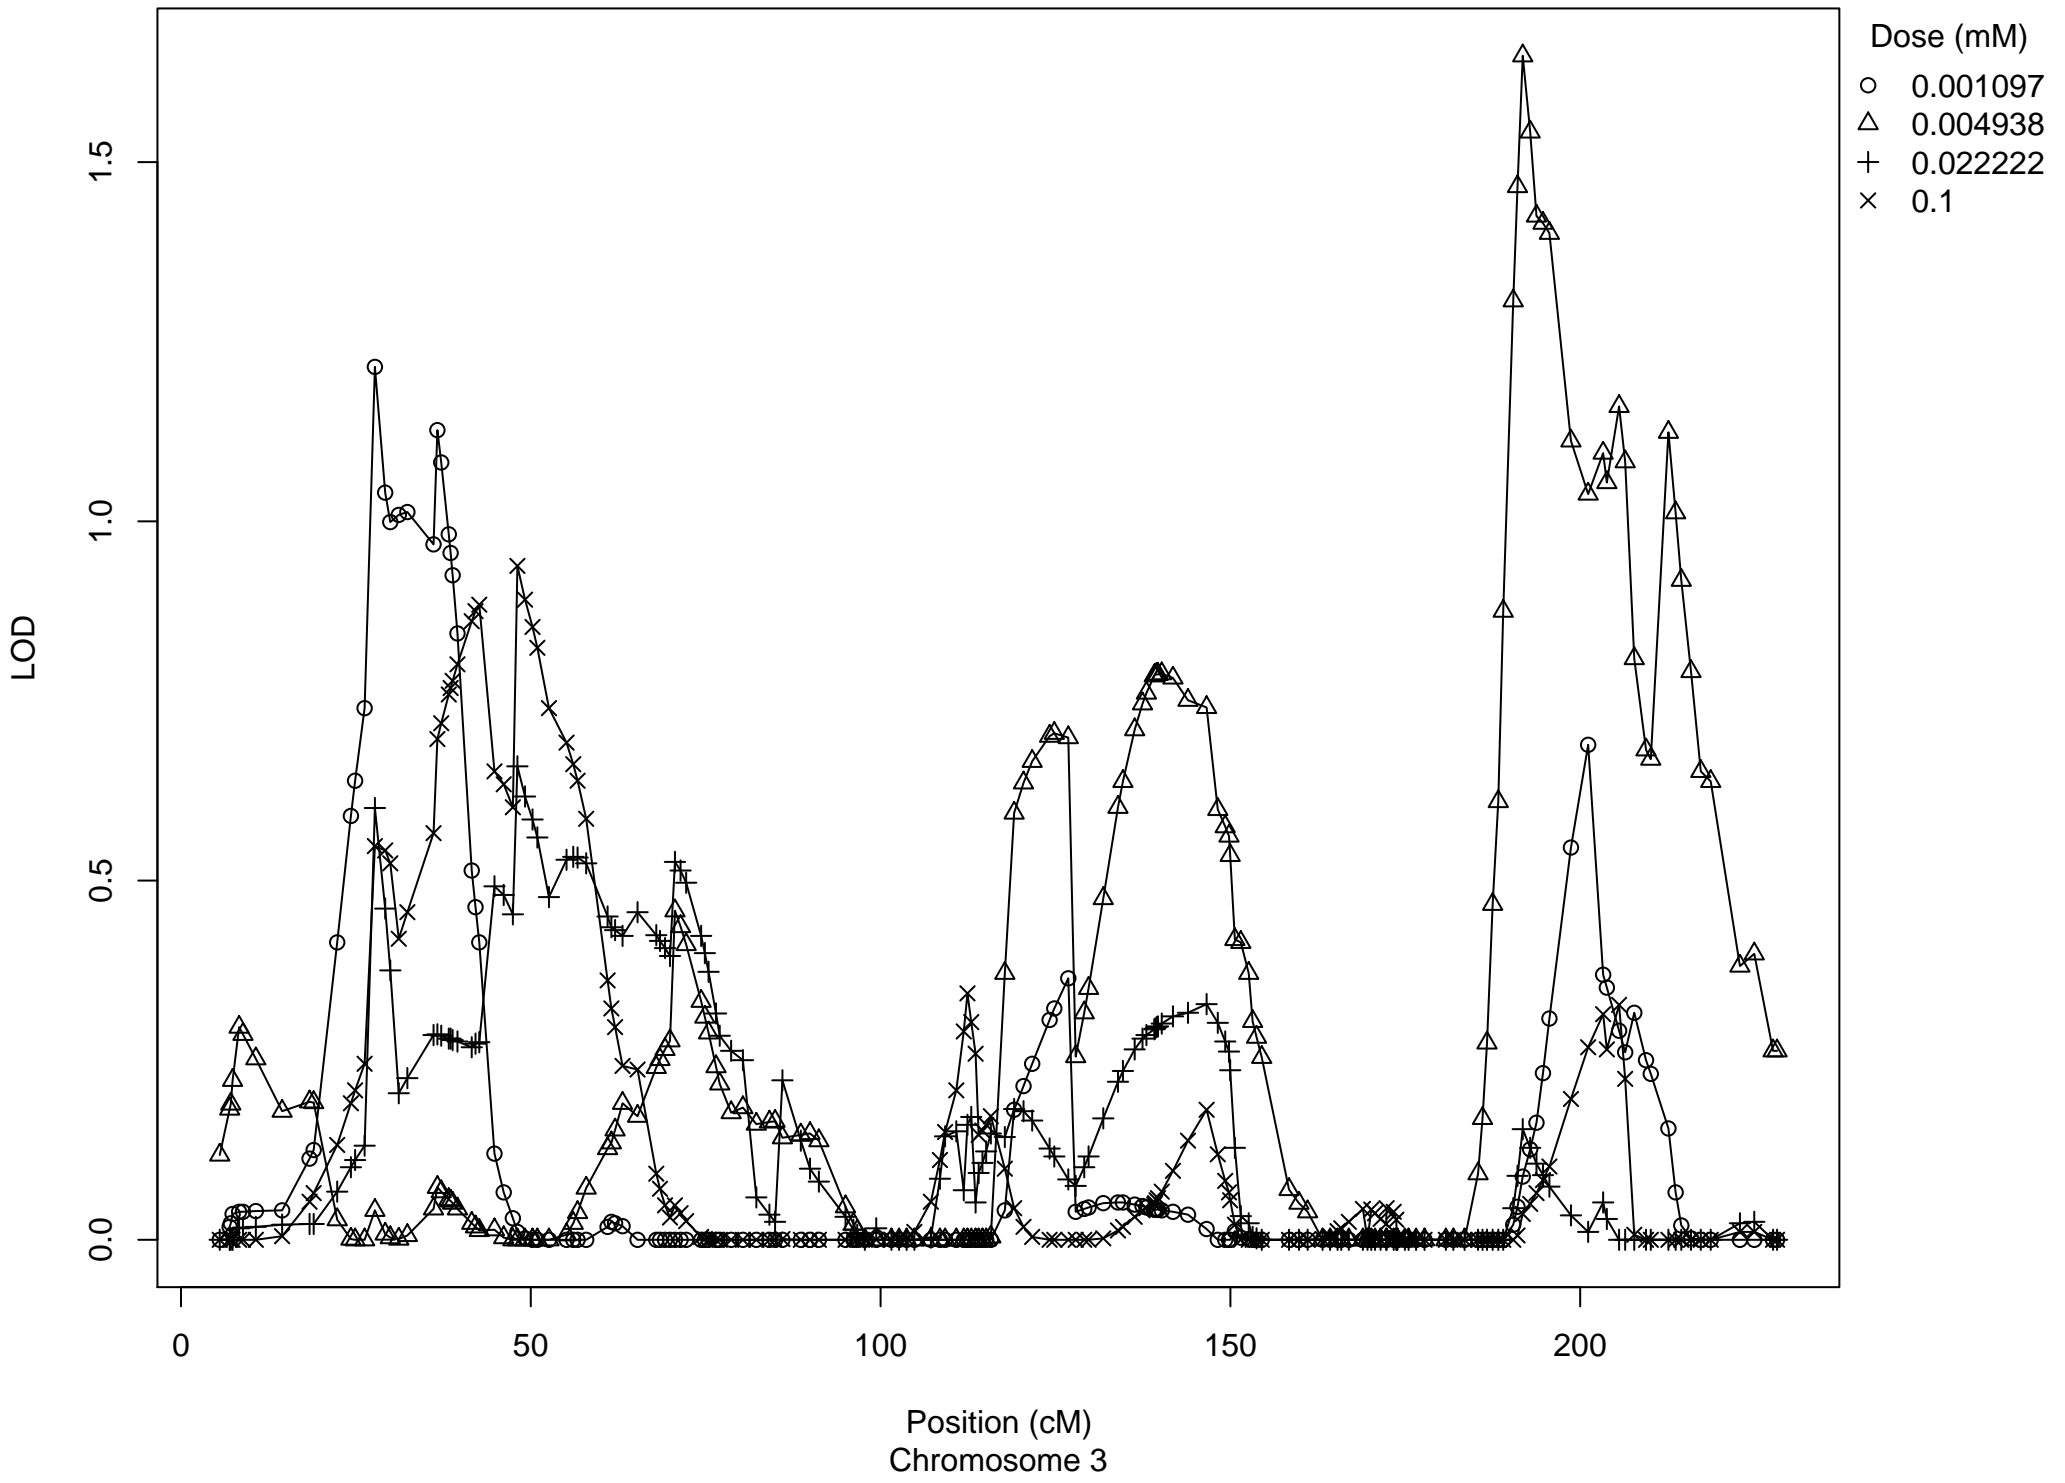

# 5-Fluorouracil (5FU)

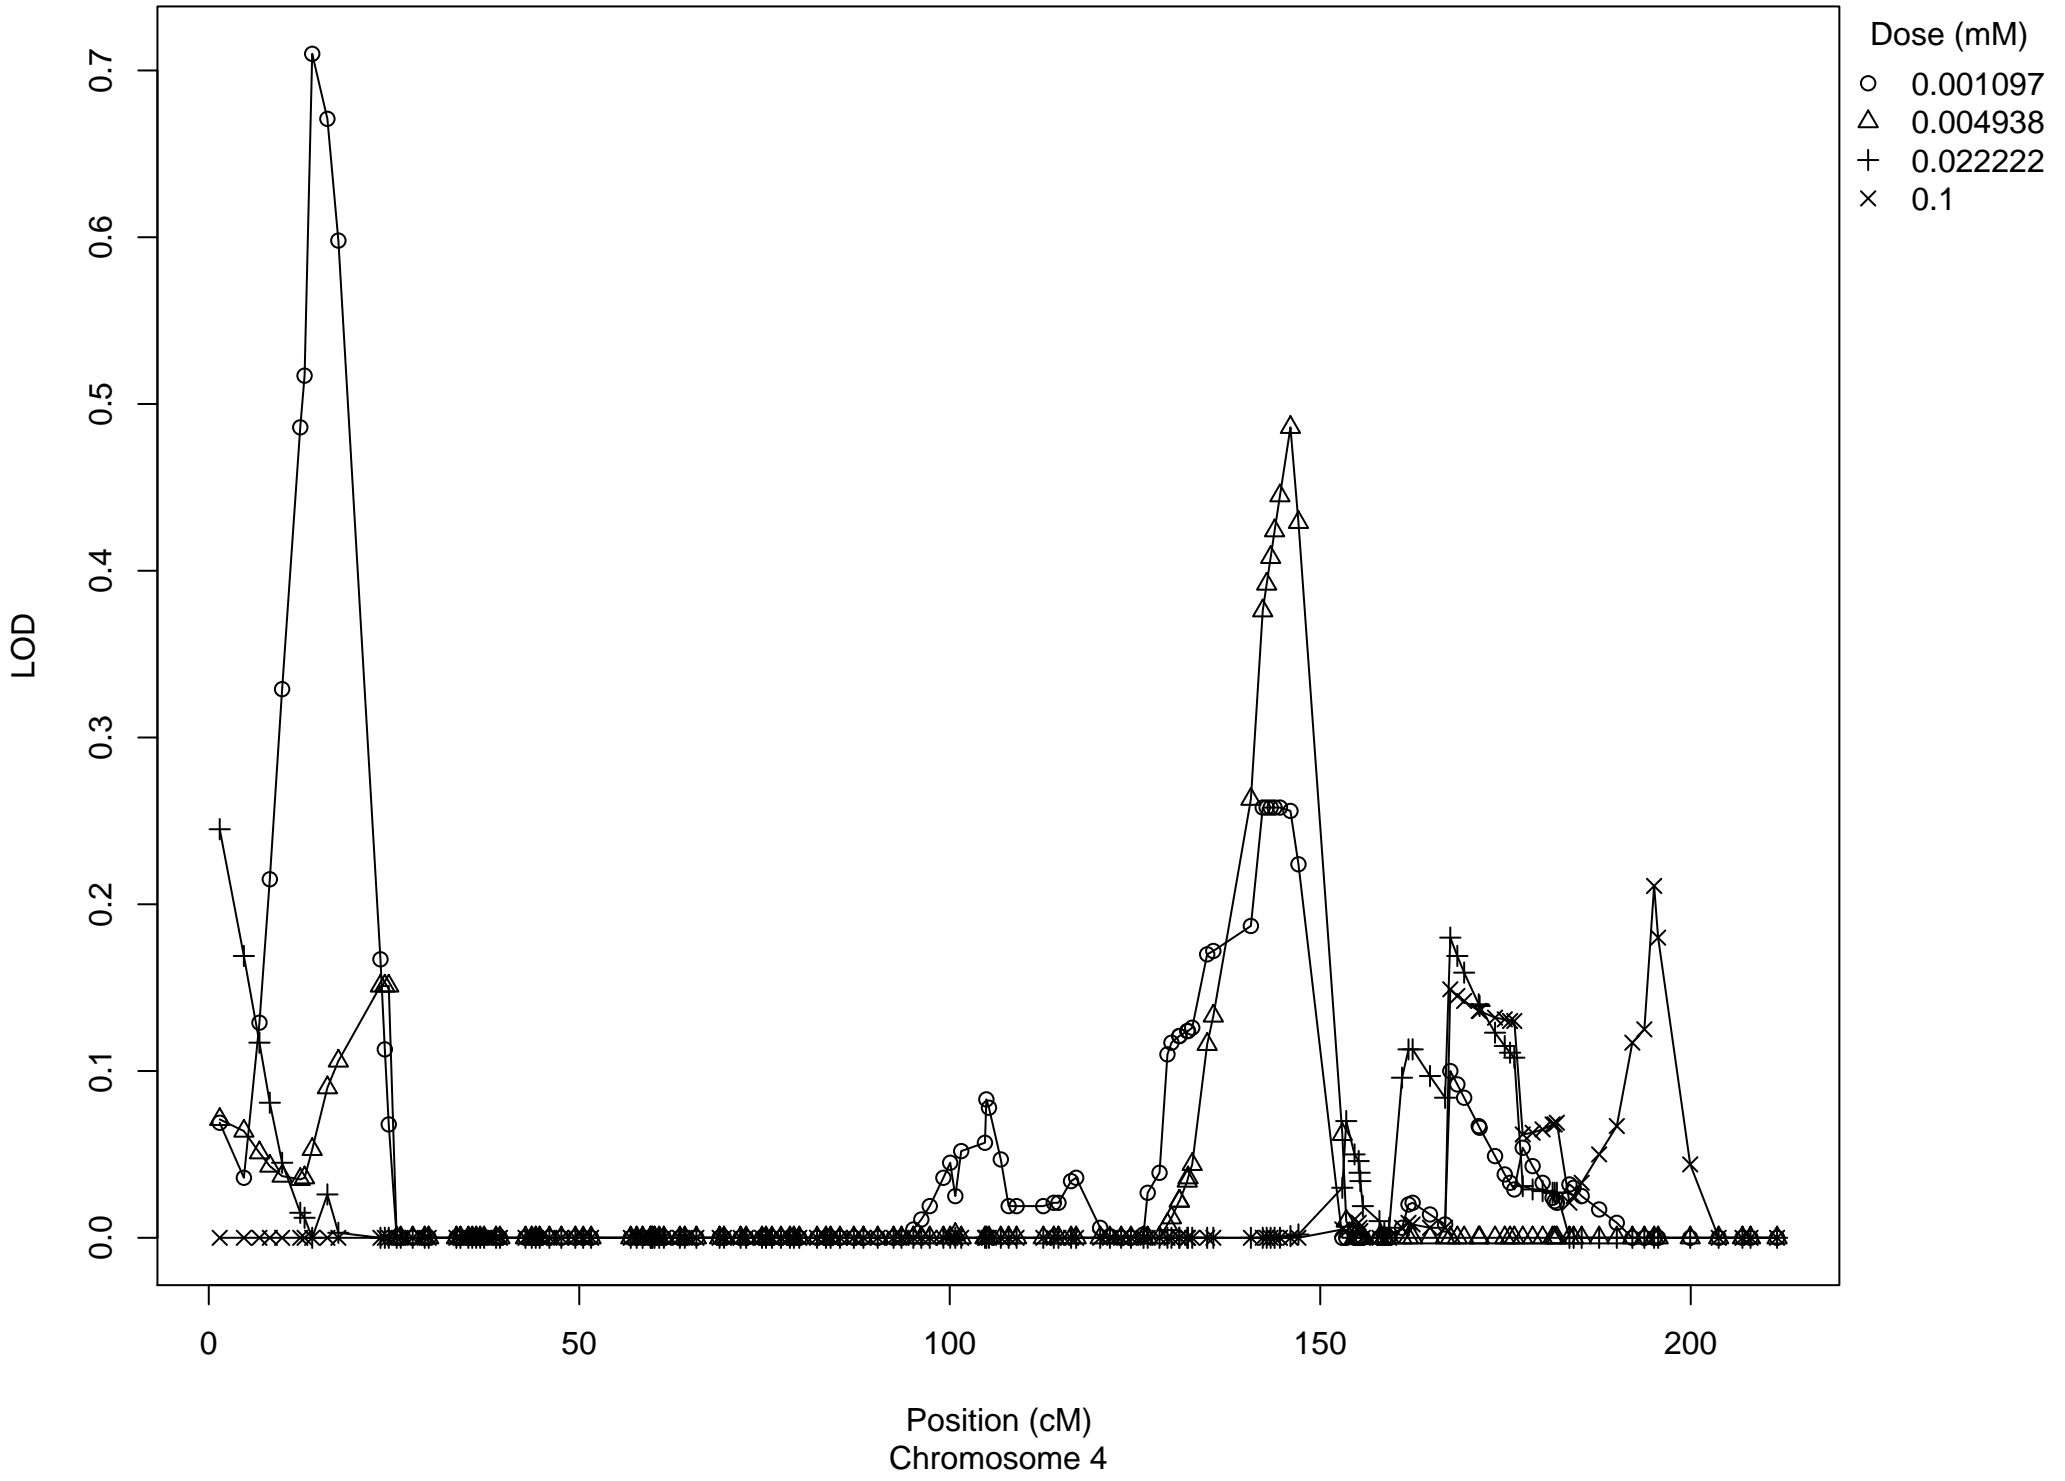

# 5-Fluorouracil (5FU)

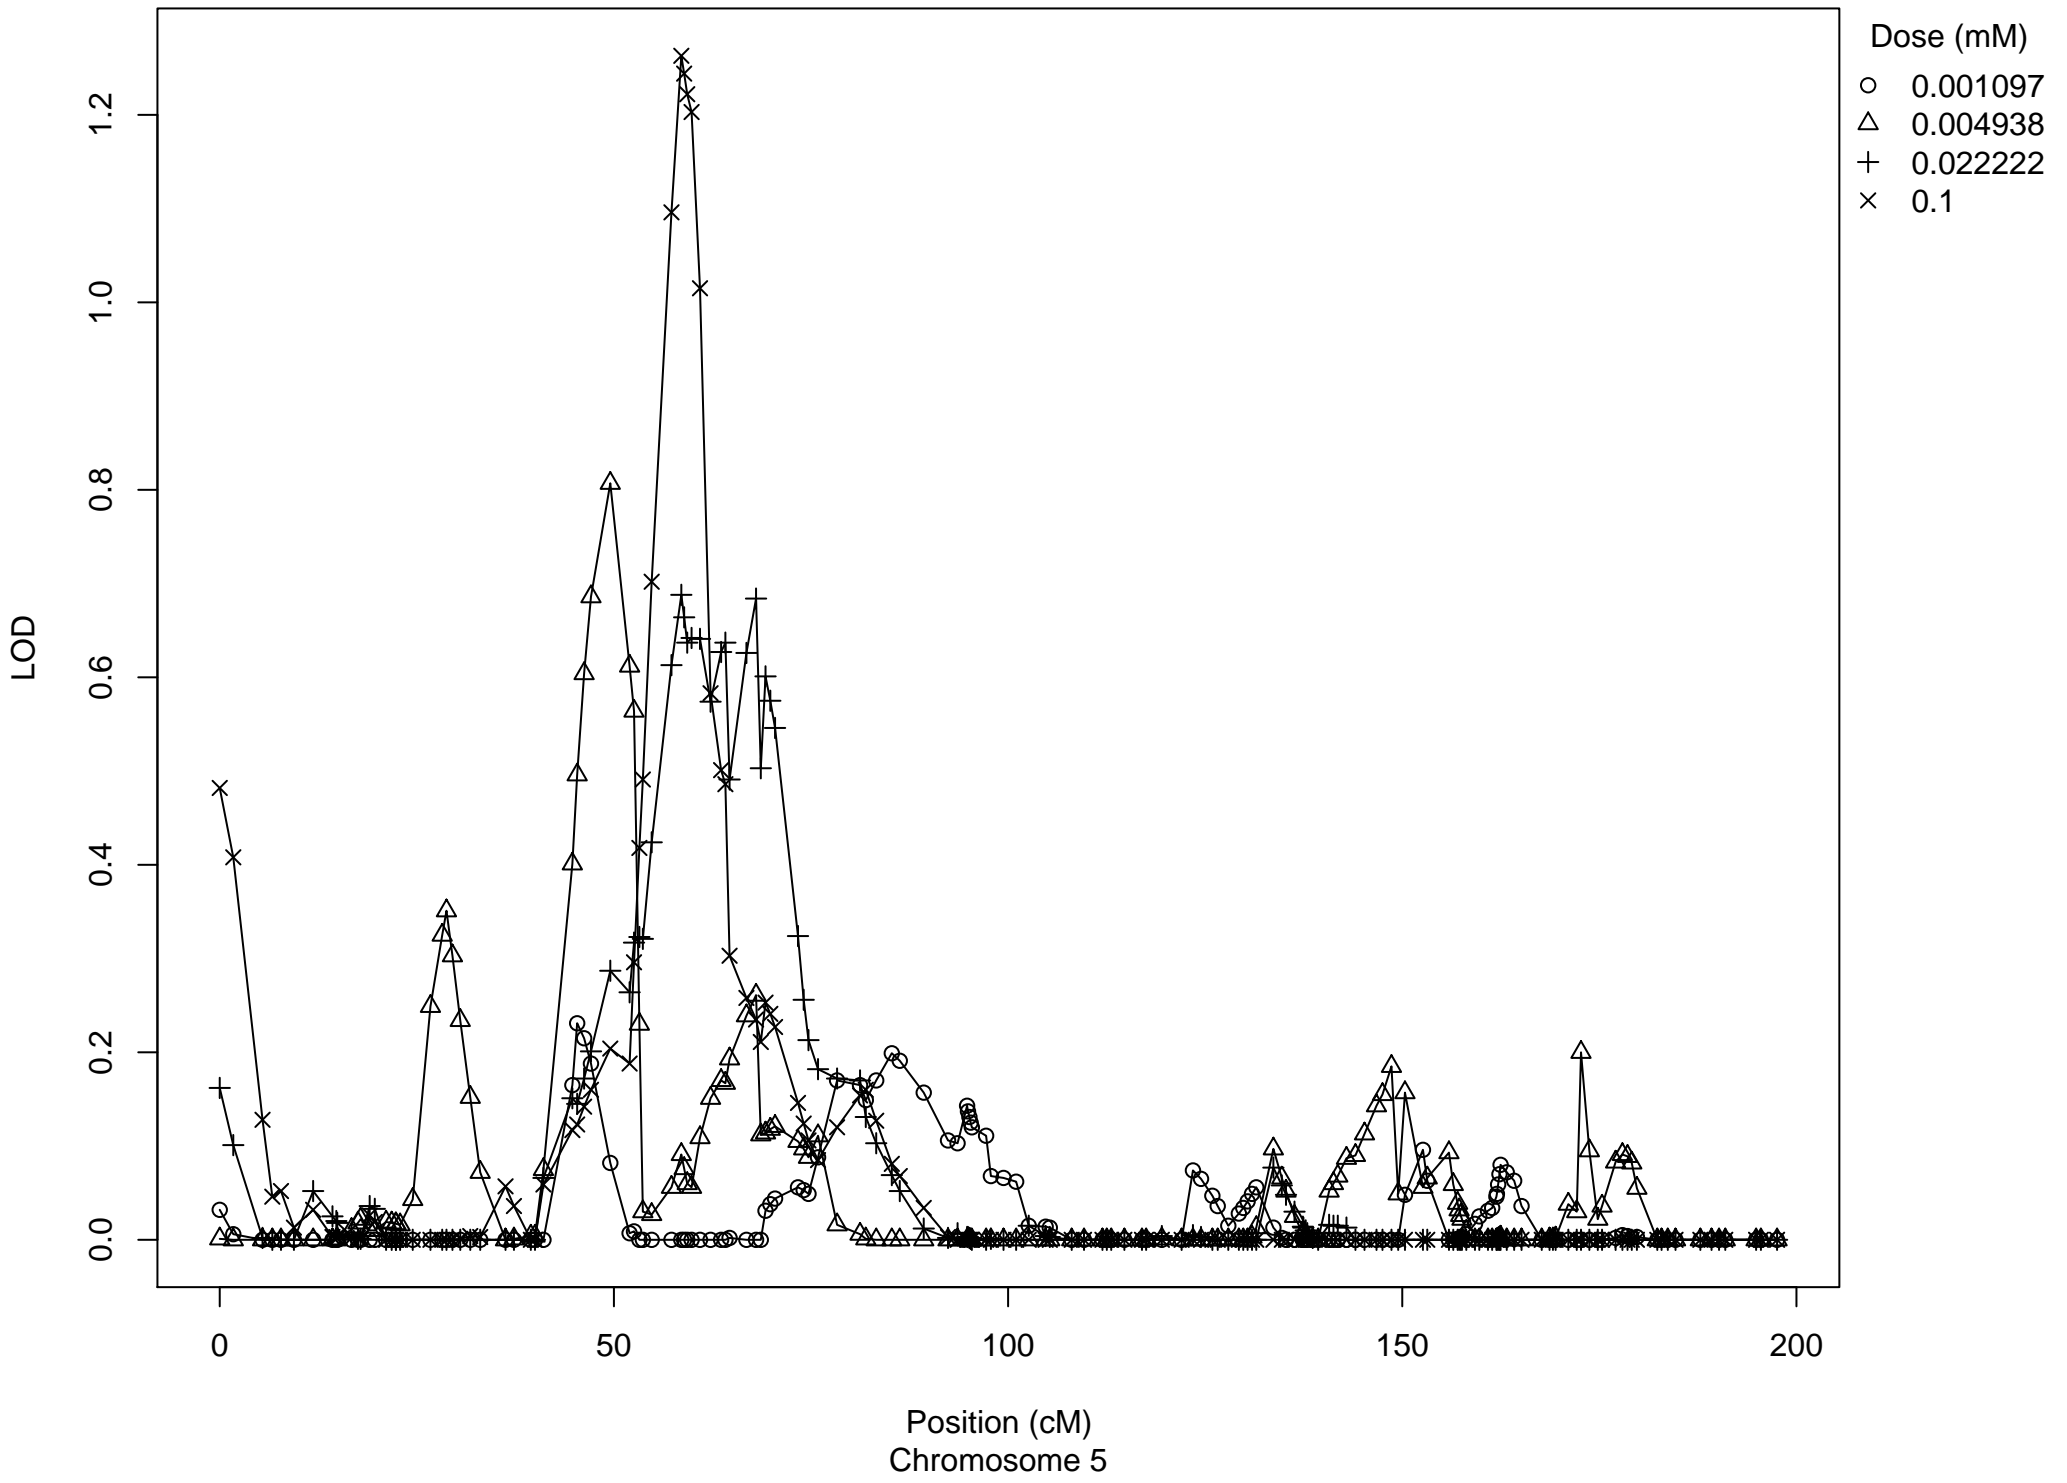

# 5-Fluorouracil (5FU)

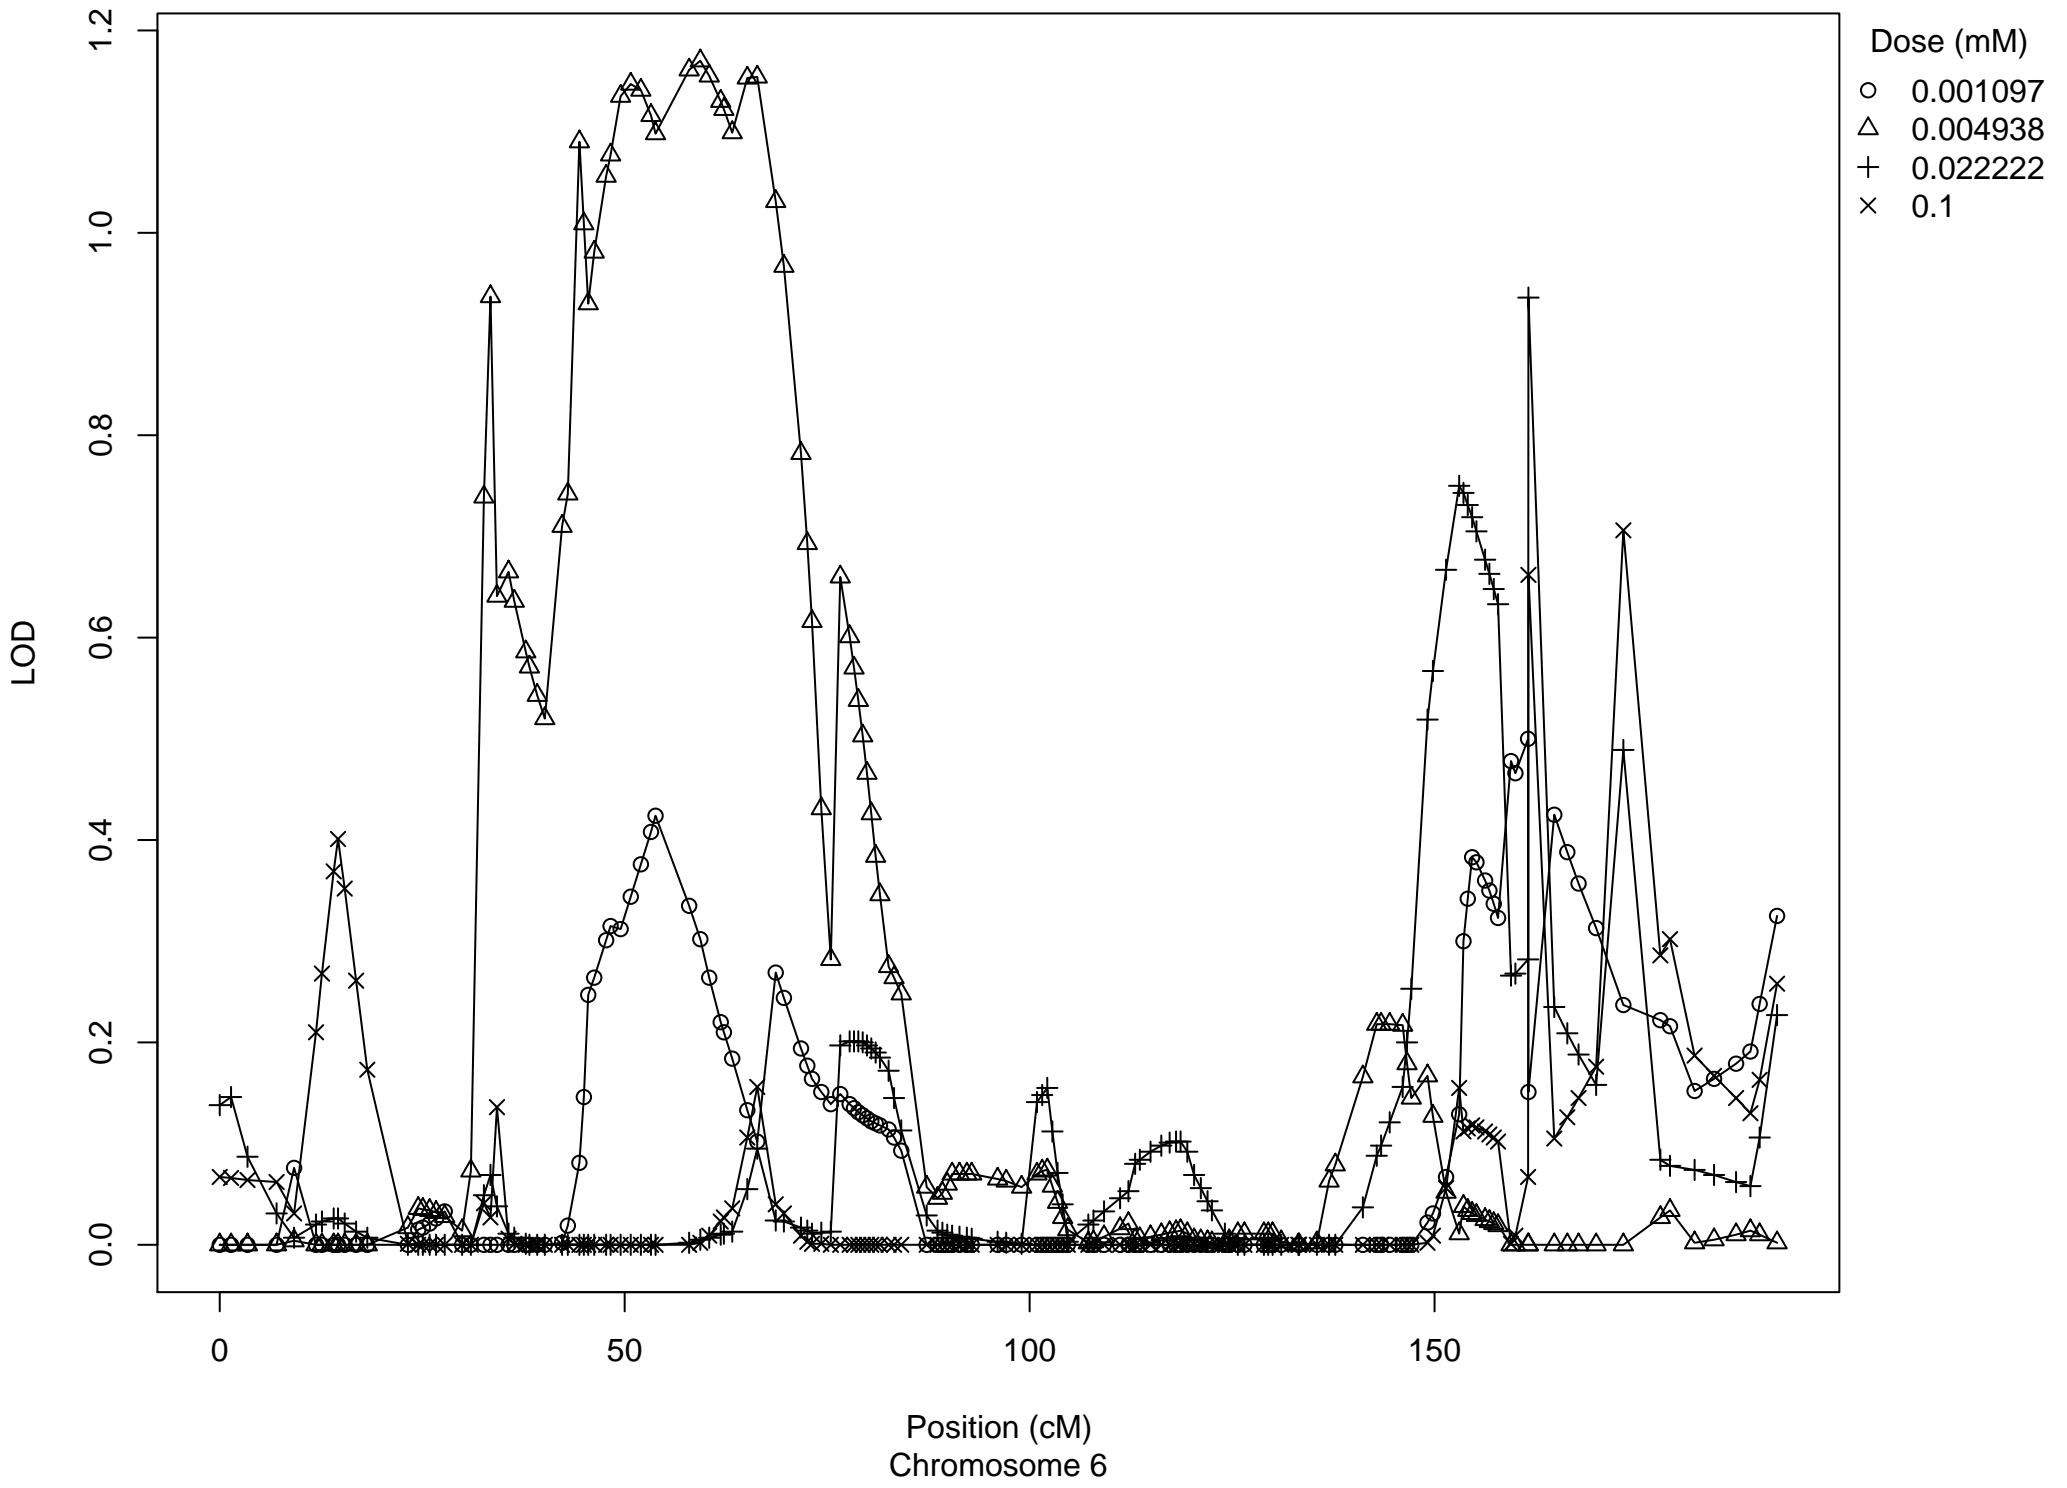

# 5-Fluorouracil (5FU)

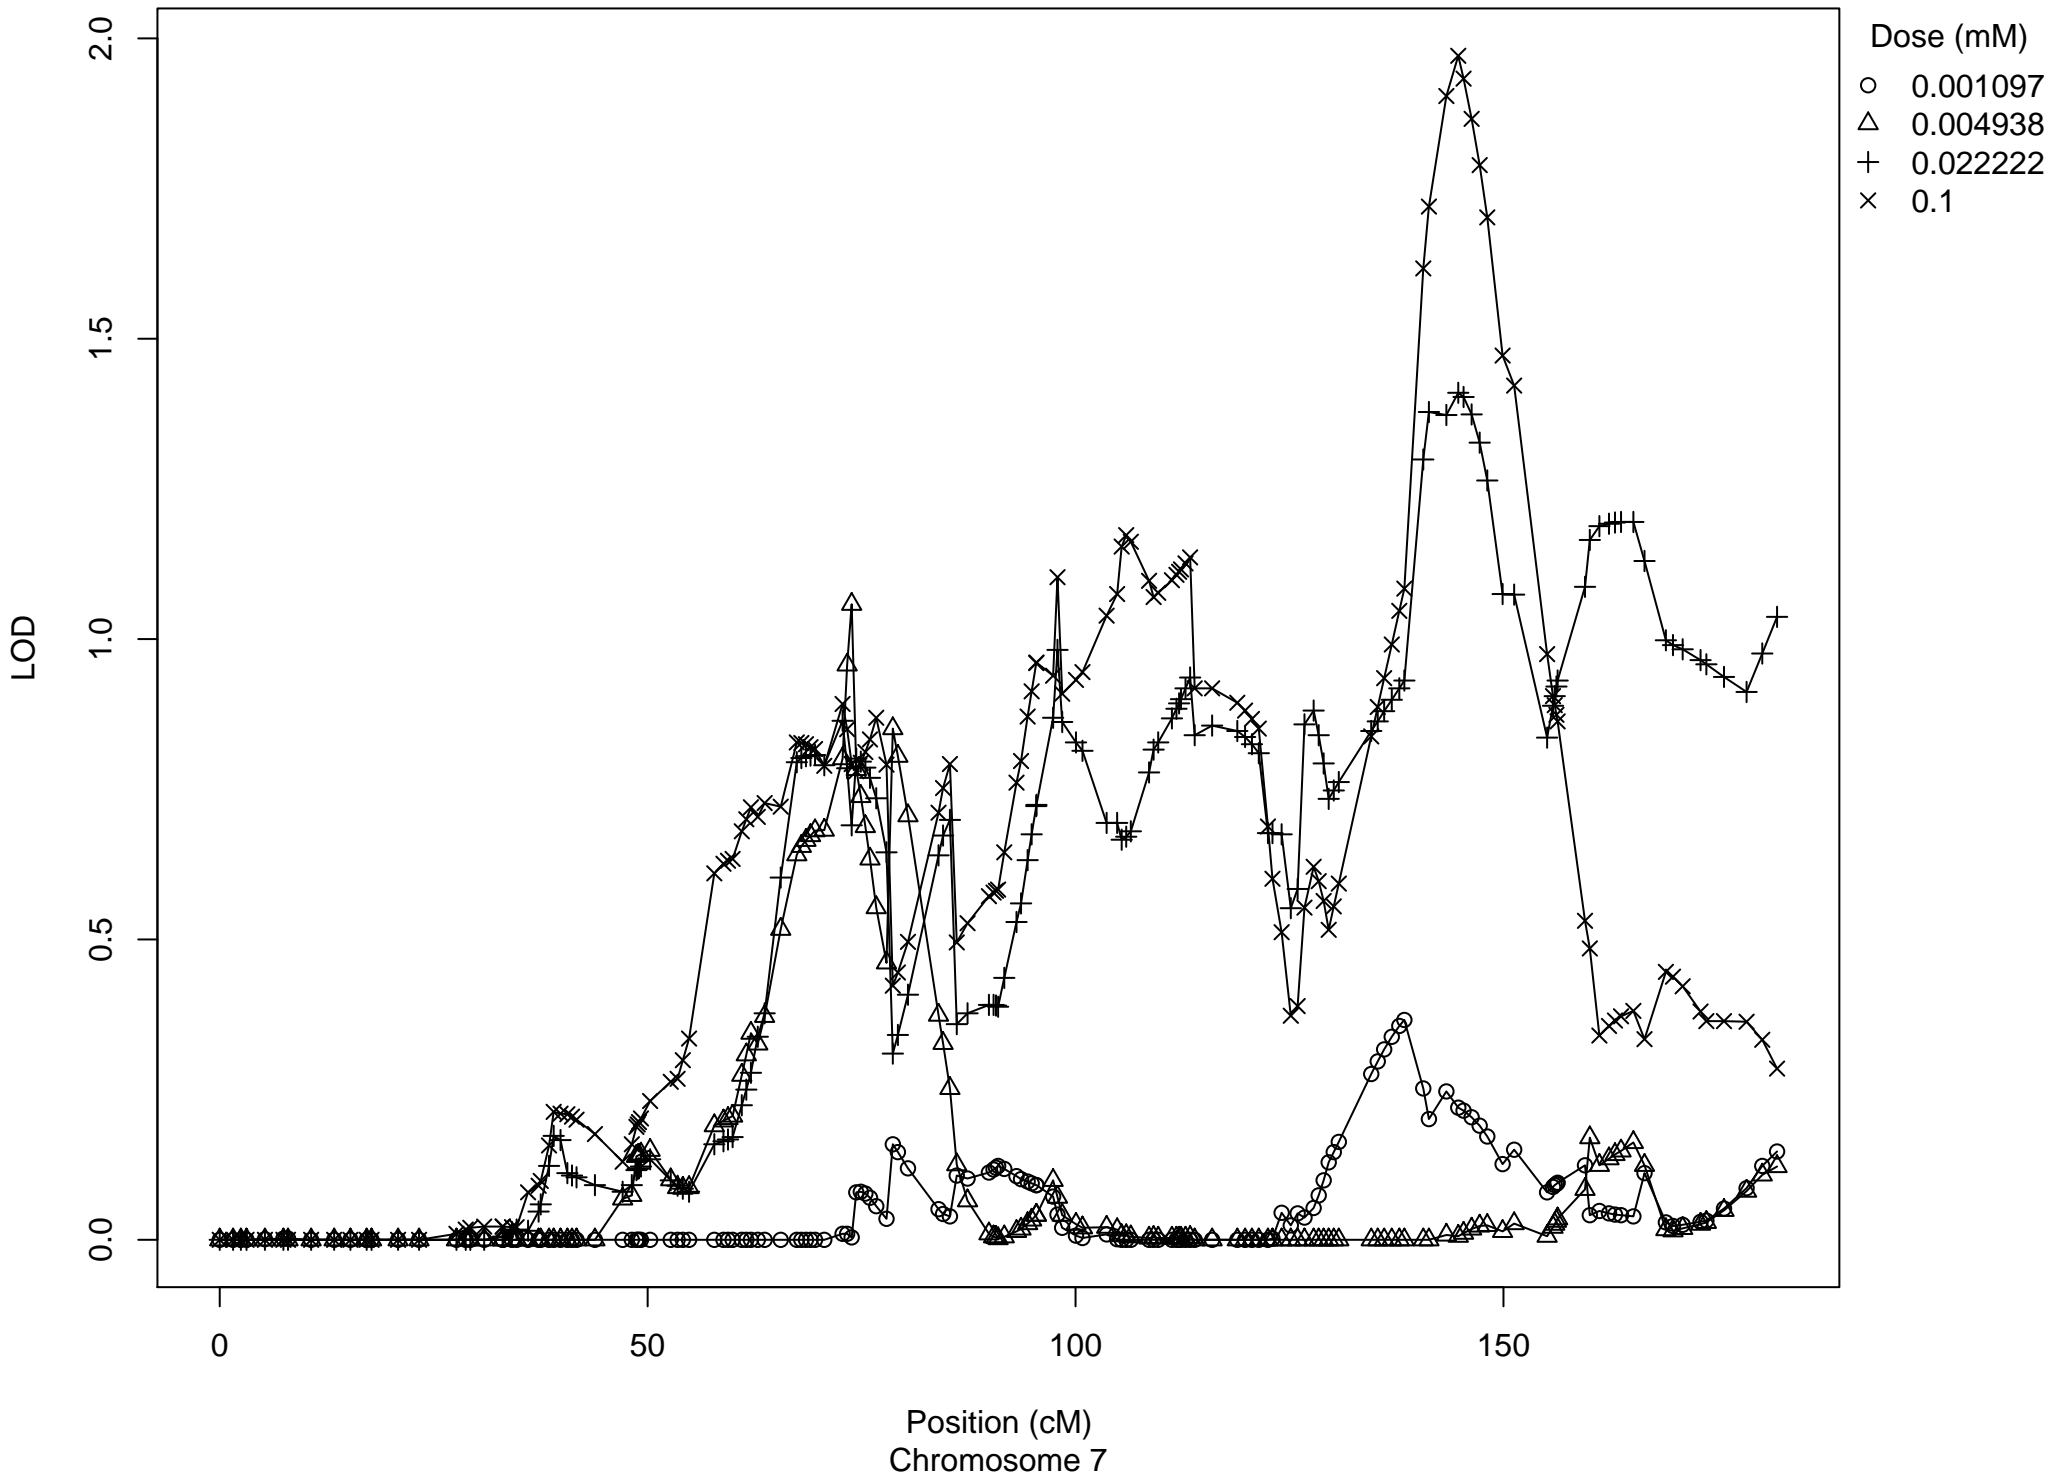

# 5-Fluorouracil (5FU)

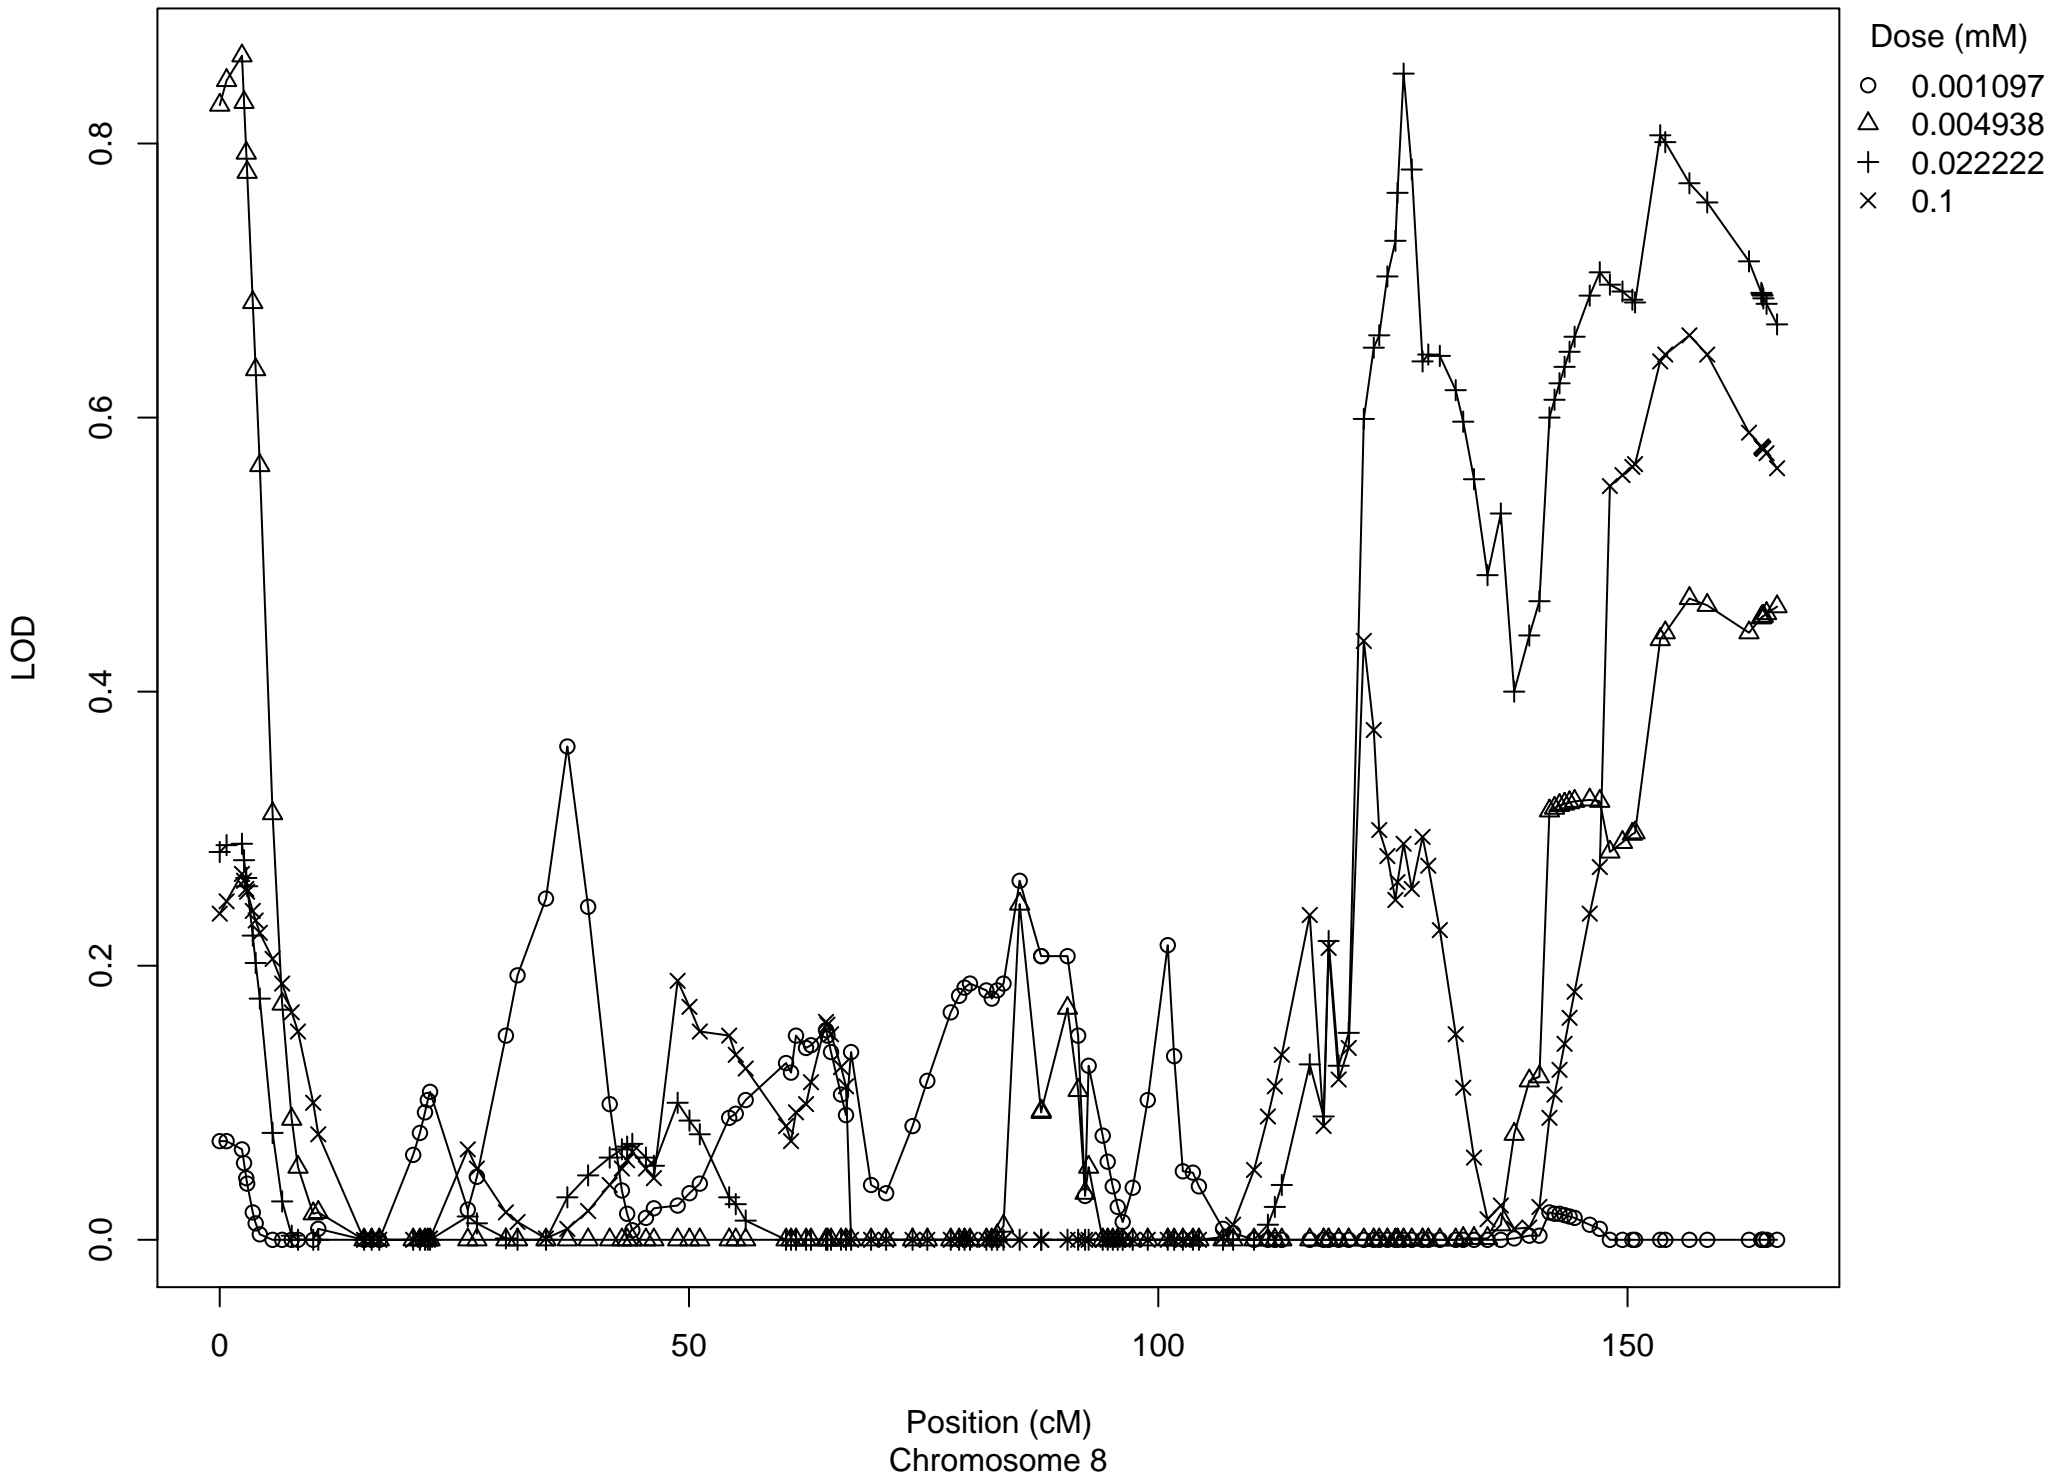



# 5-Fluorouracil (5FU)

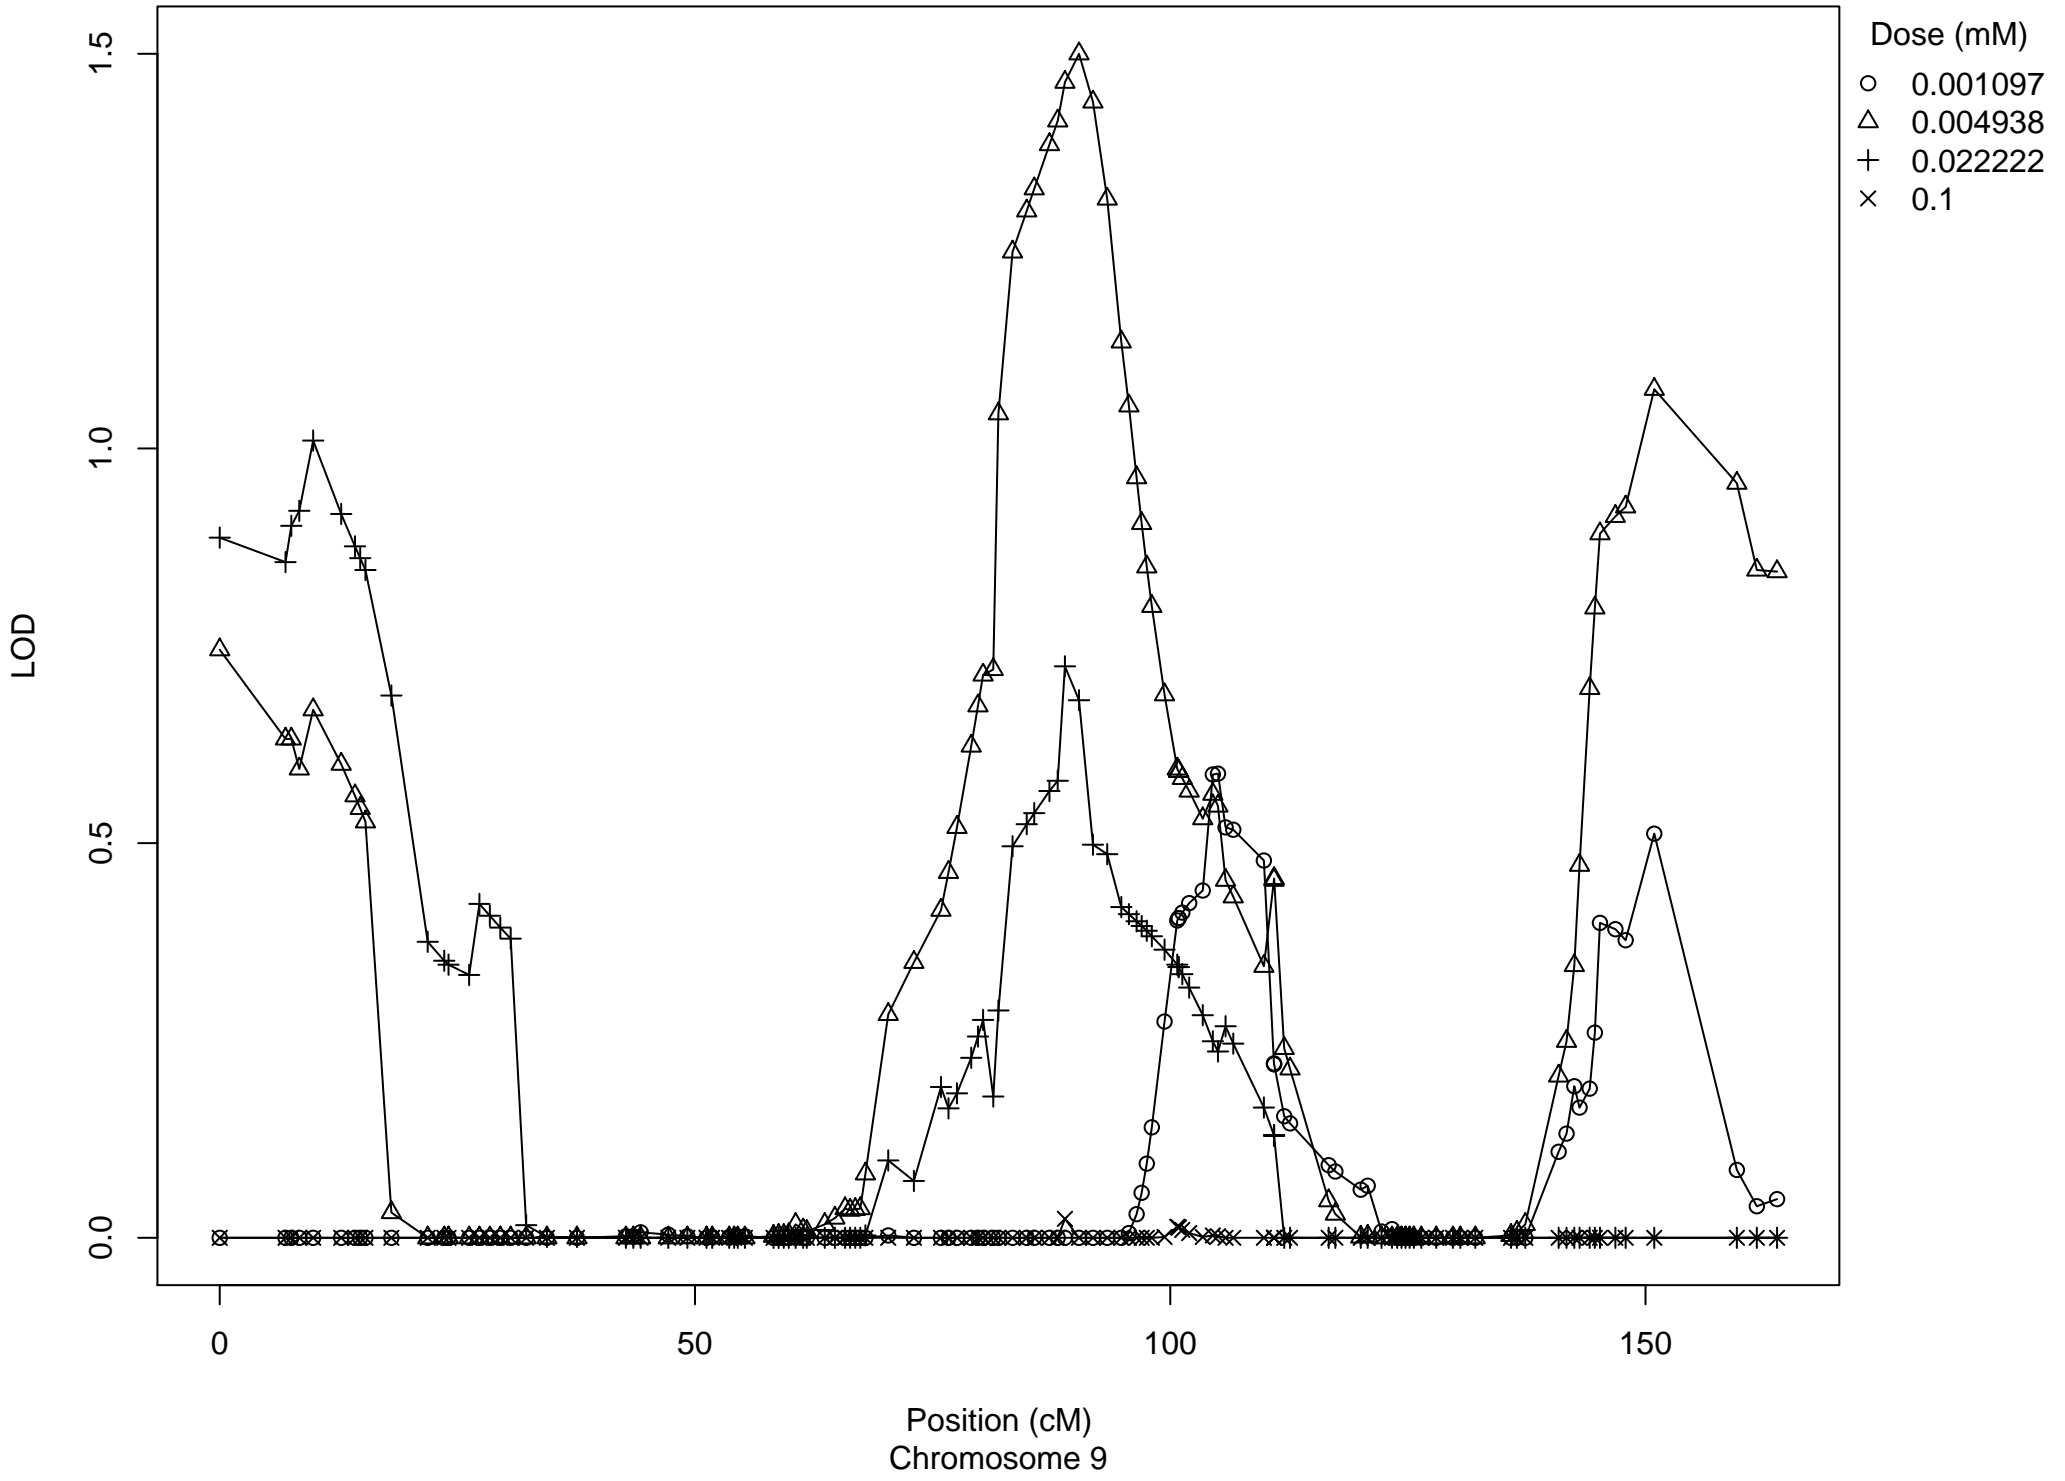

# 5-Fluorouracil (5FU)

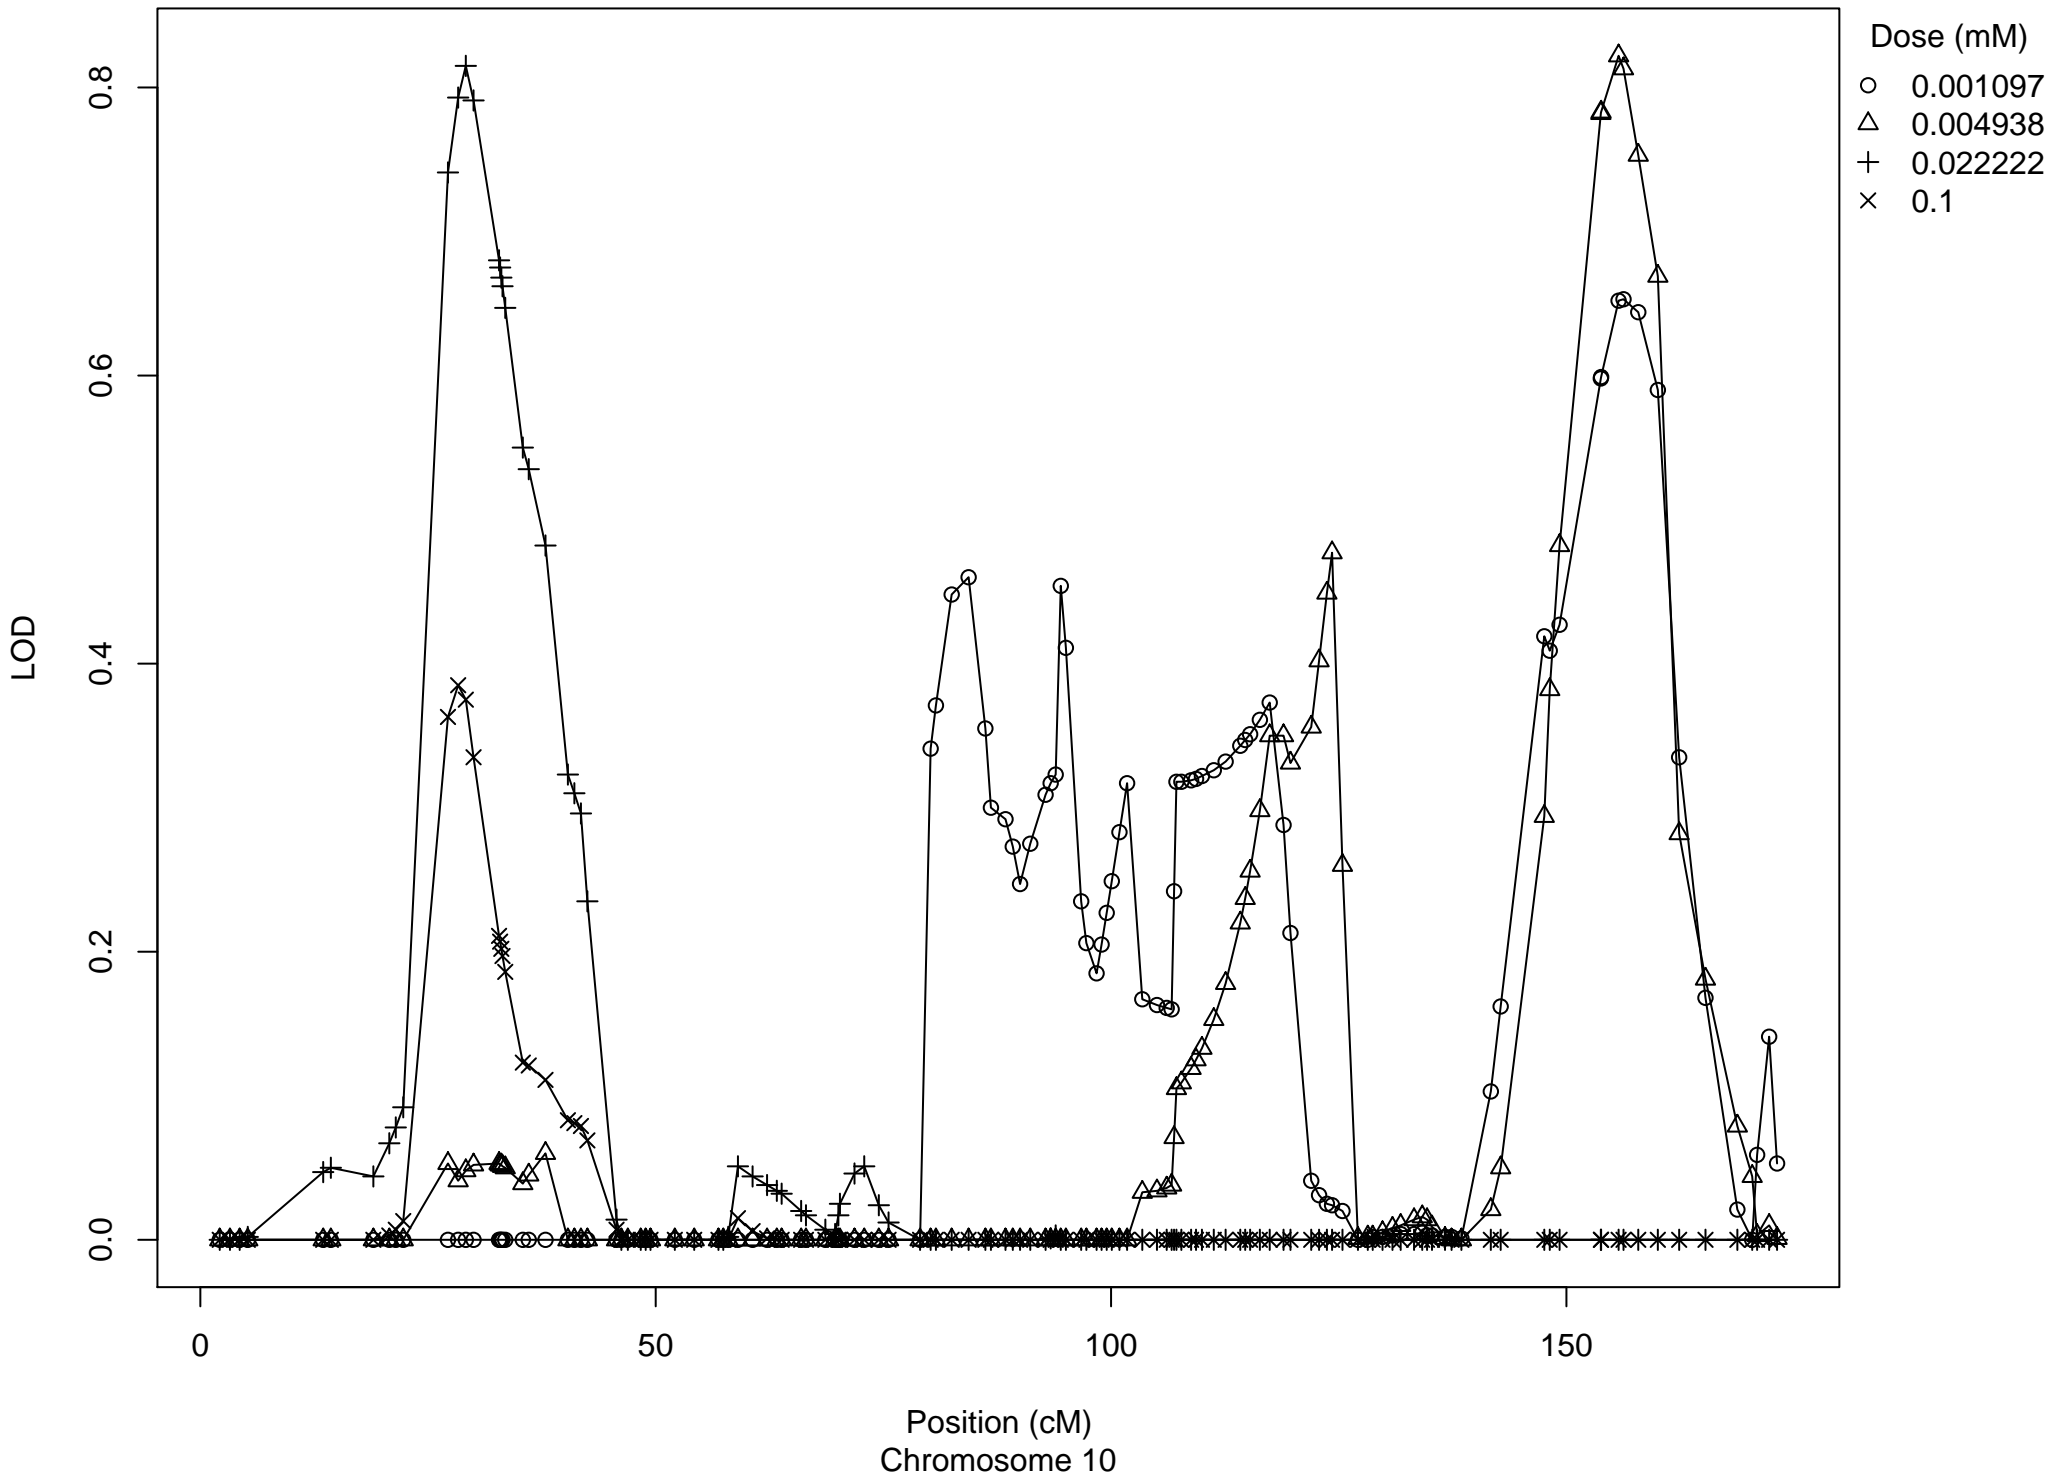

# 5-Fluorouracil (5FU)

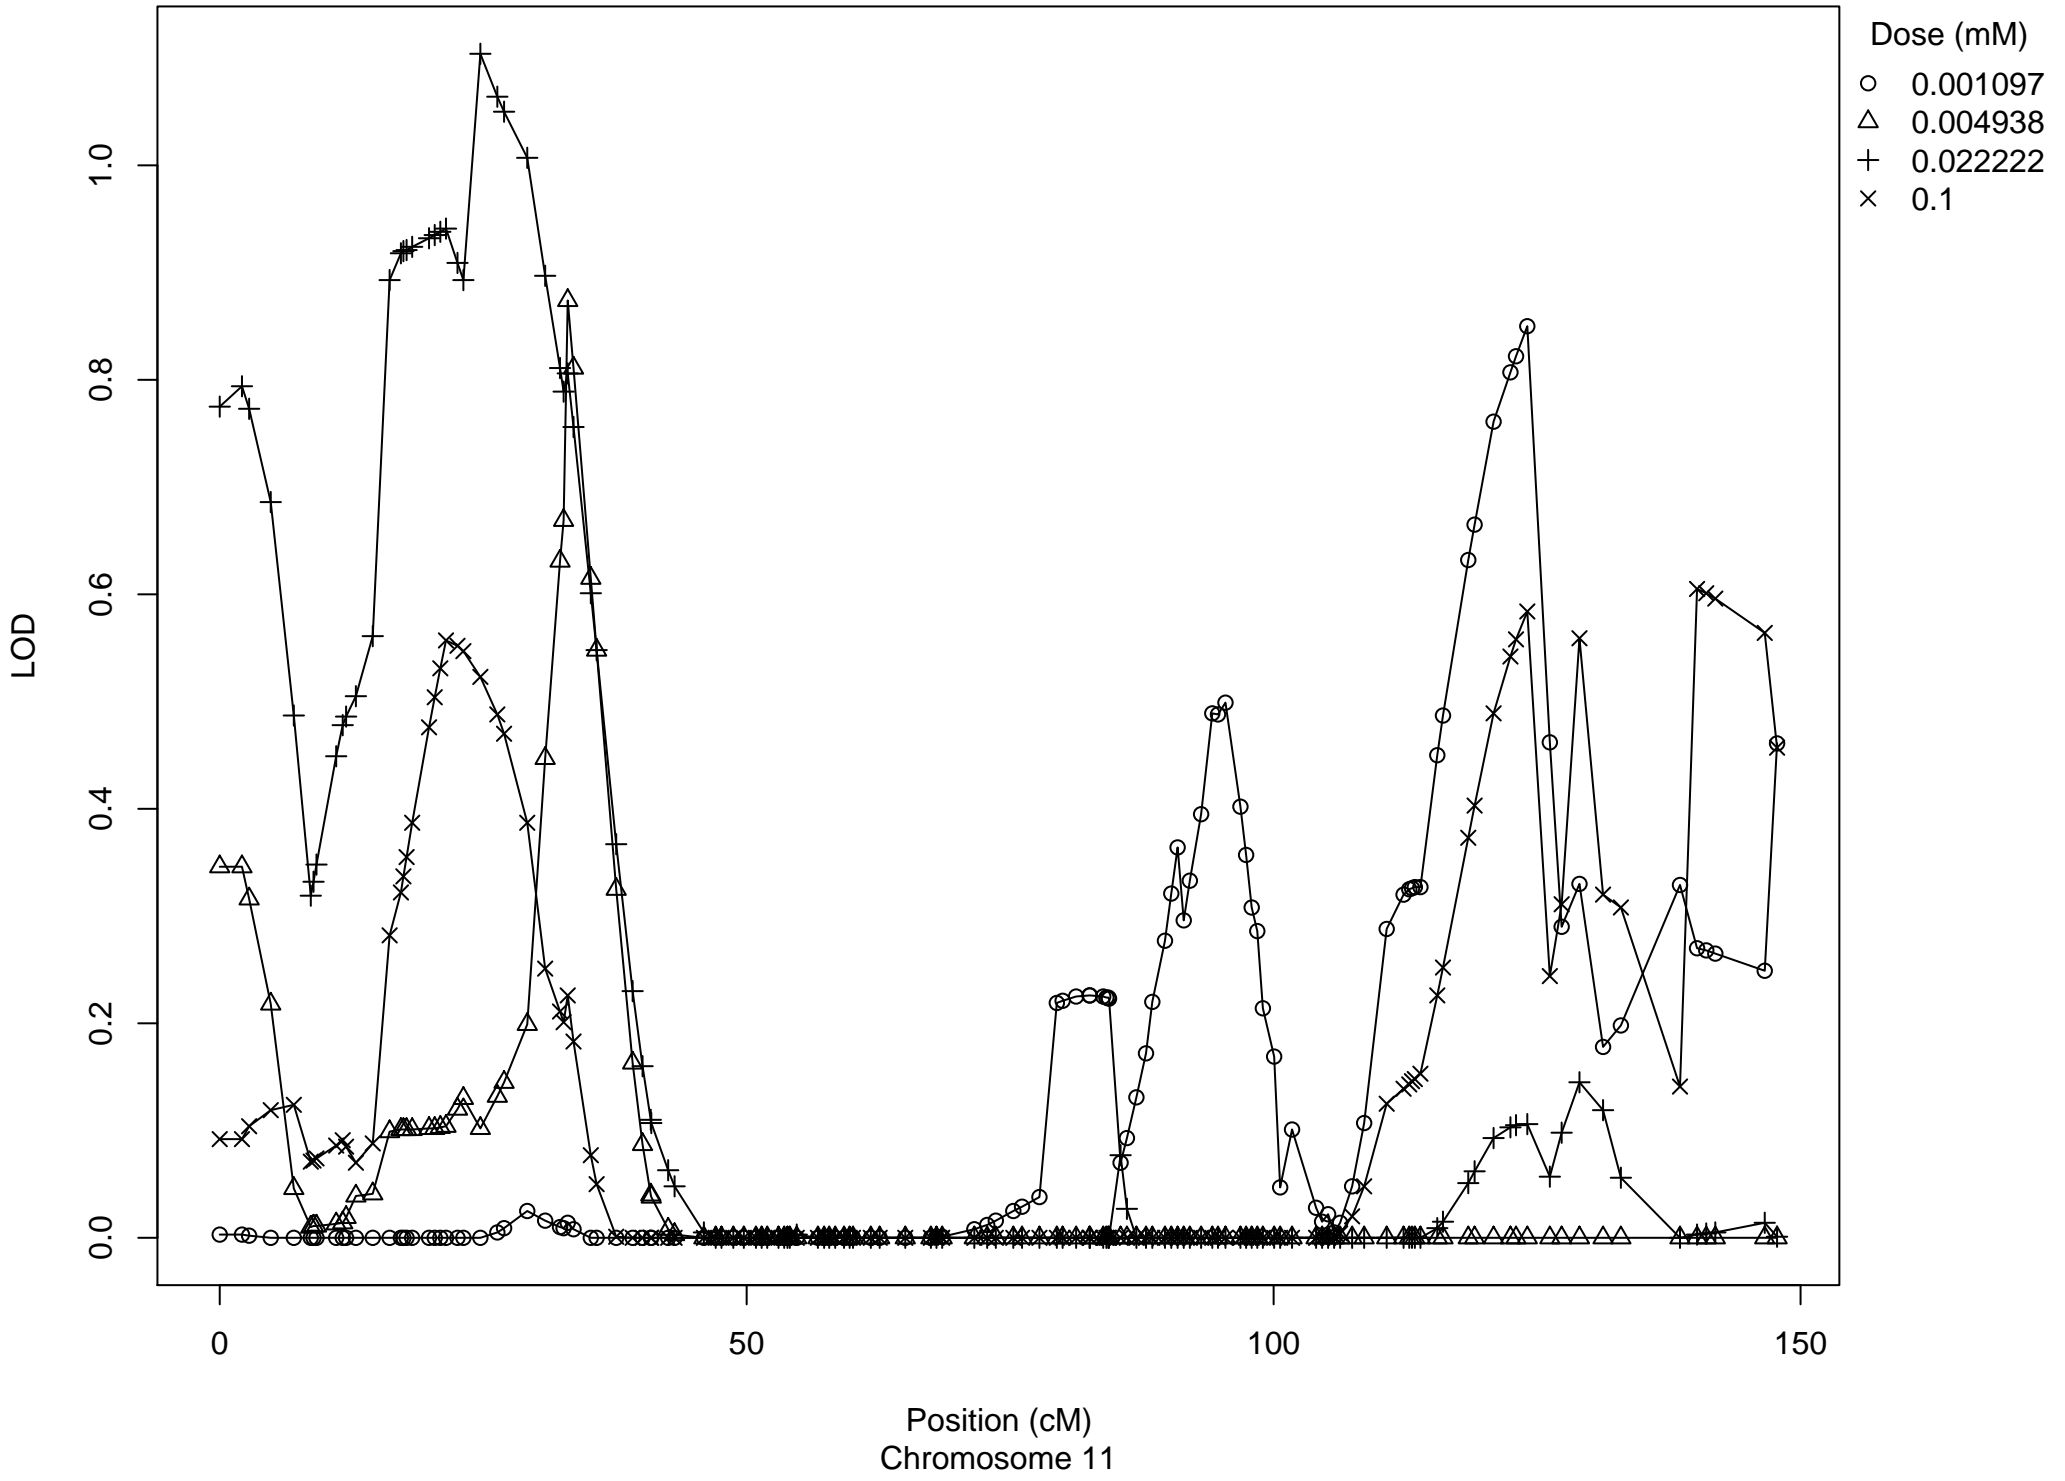

# 5-Fluorouracil (5FU)

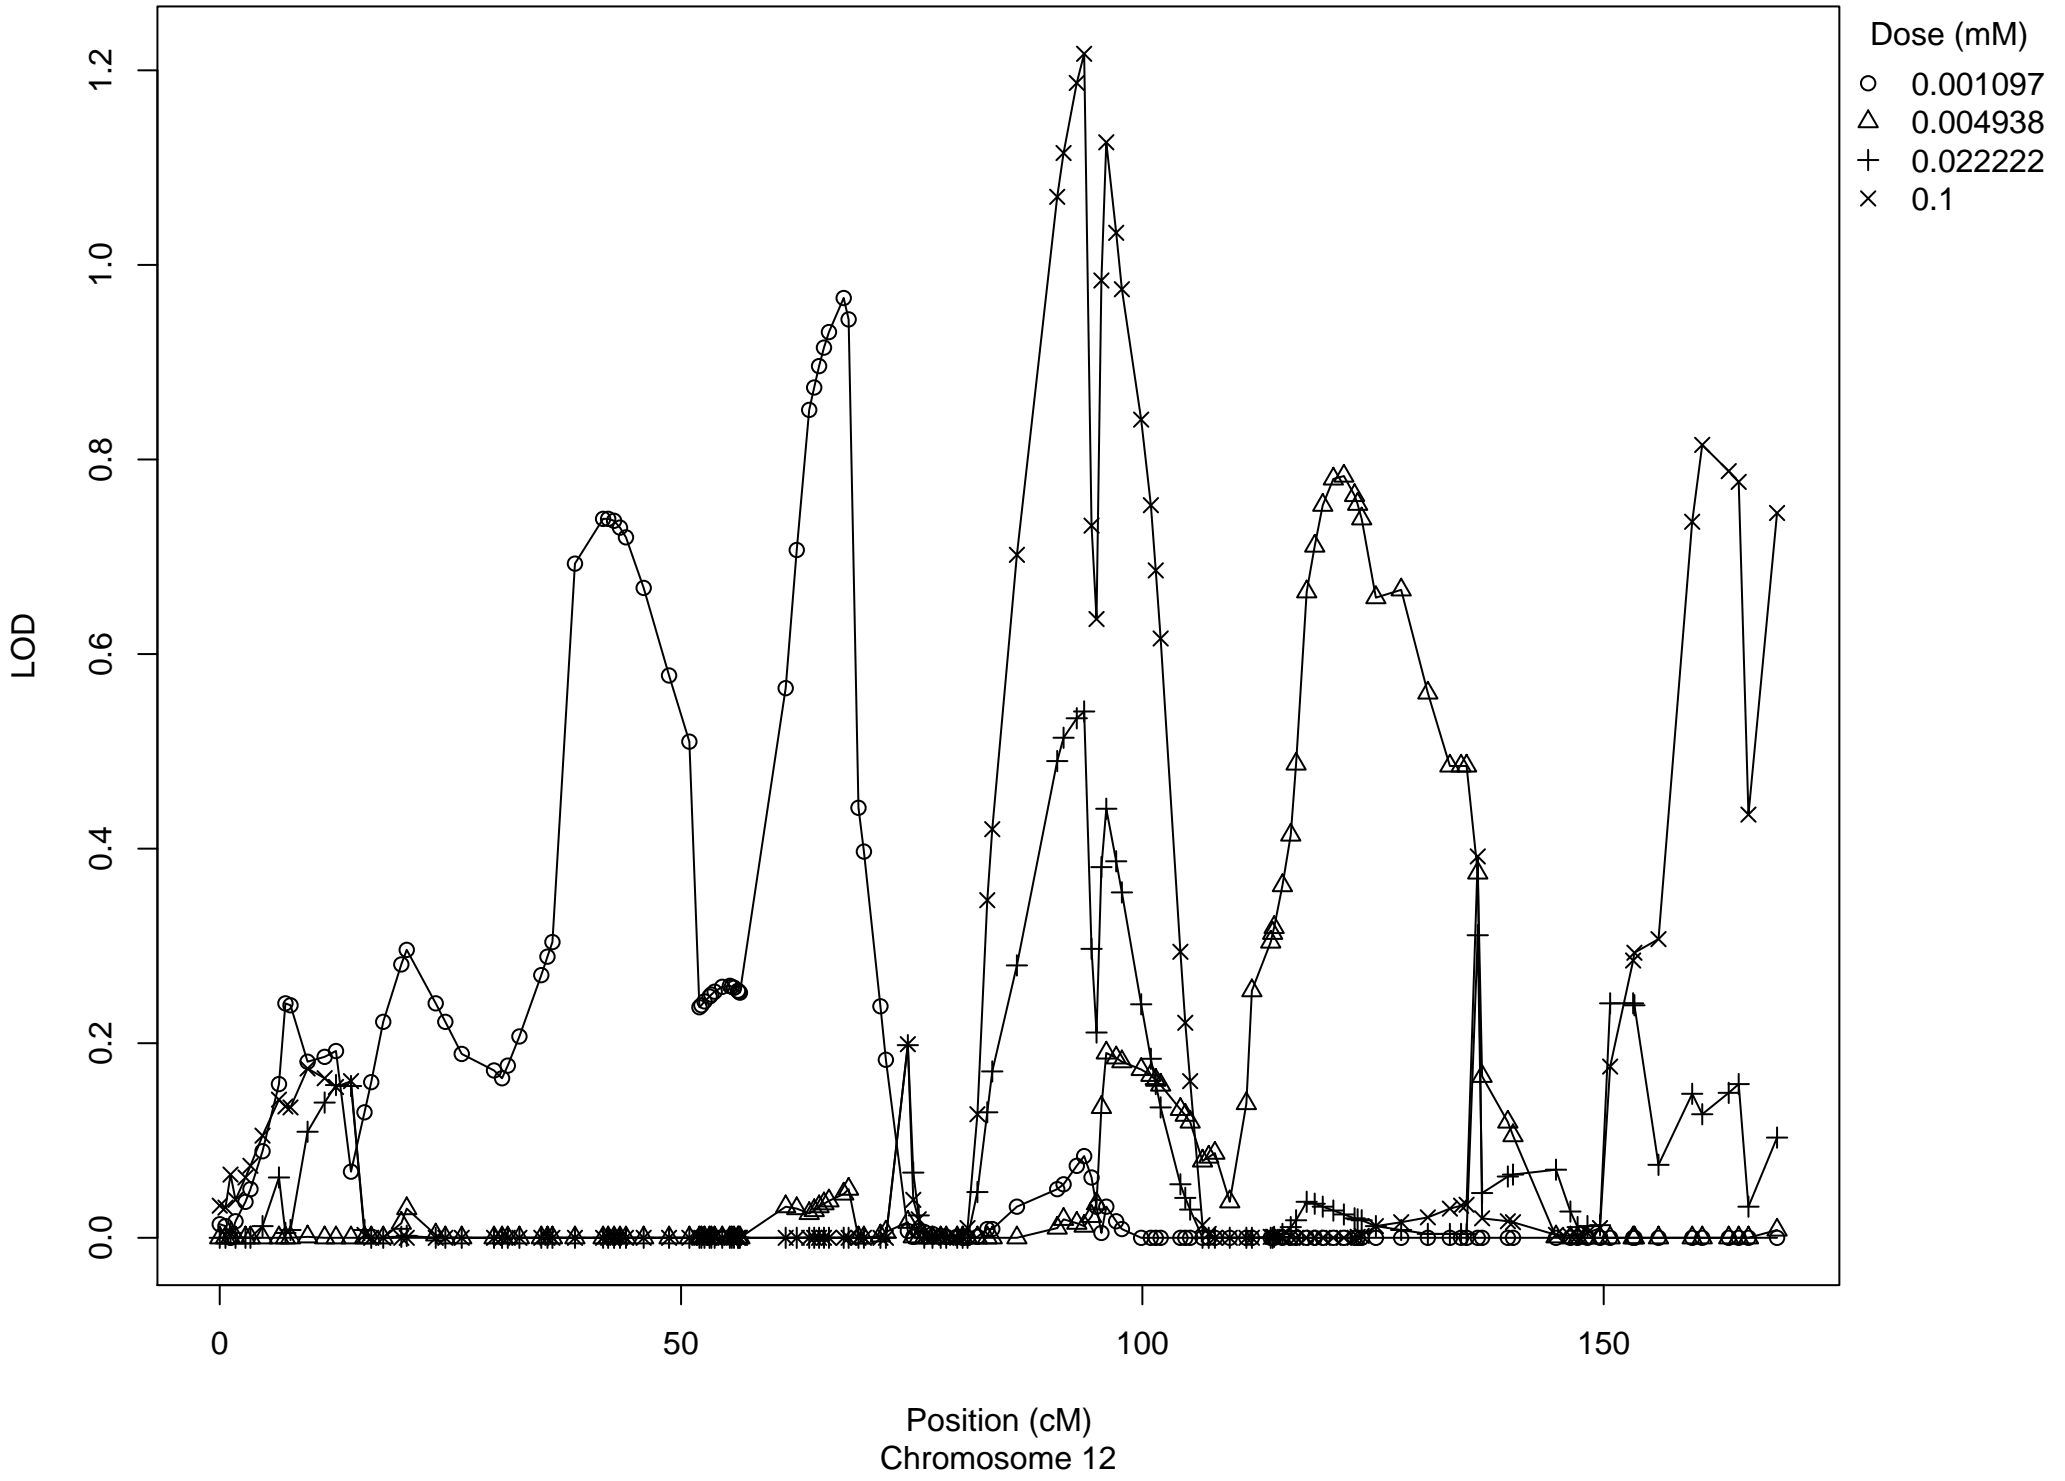

# 5-Fluorouracil (5FU)

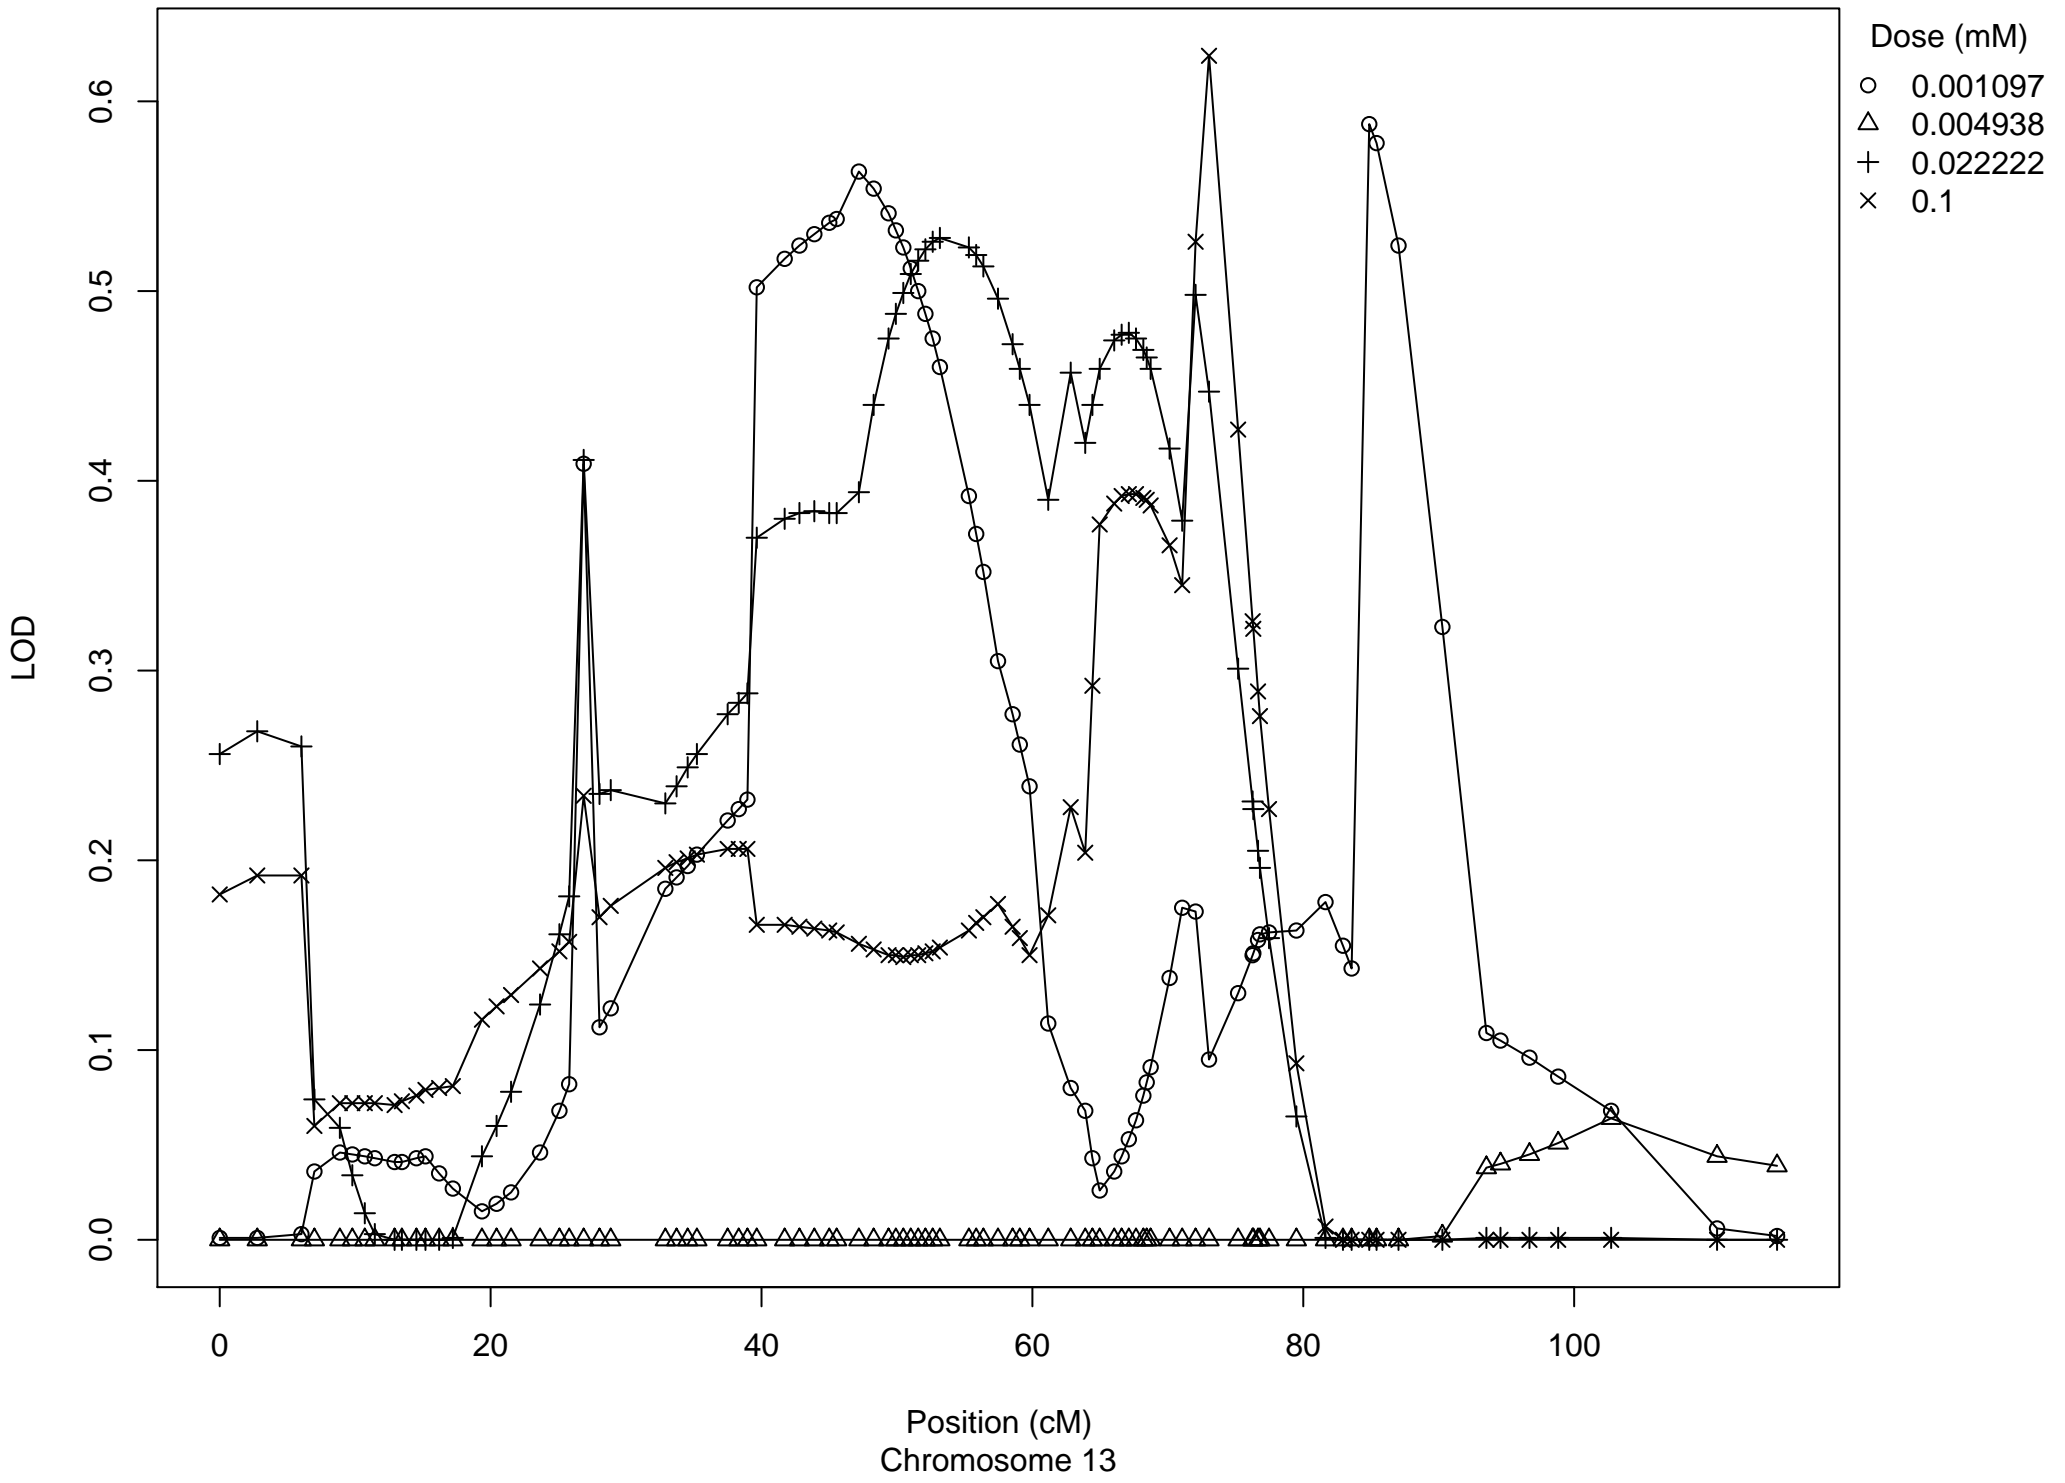

# 5-Fluorouracil (5FU)

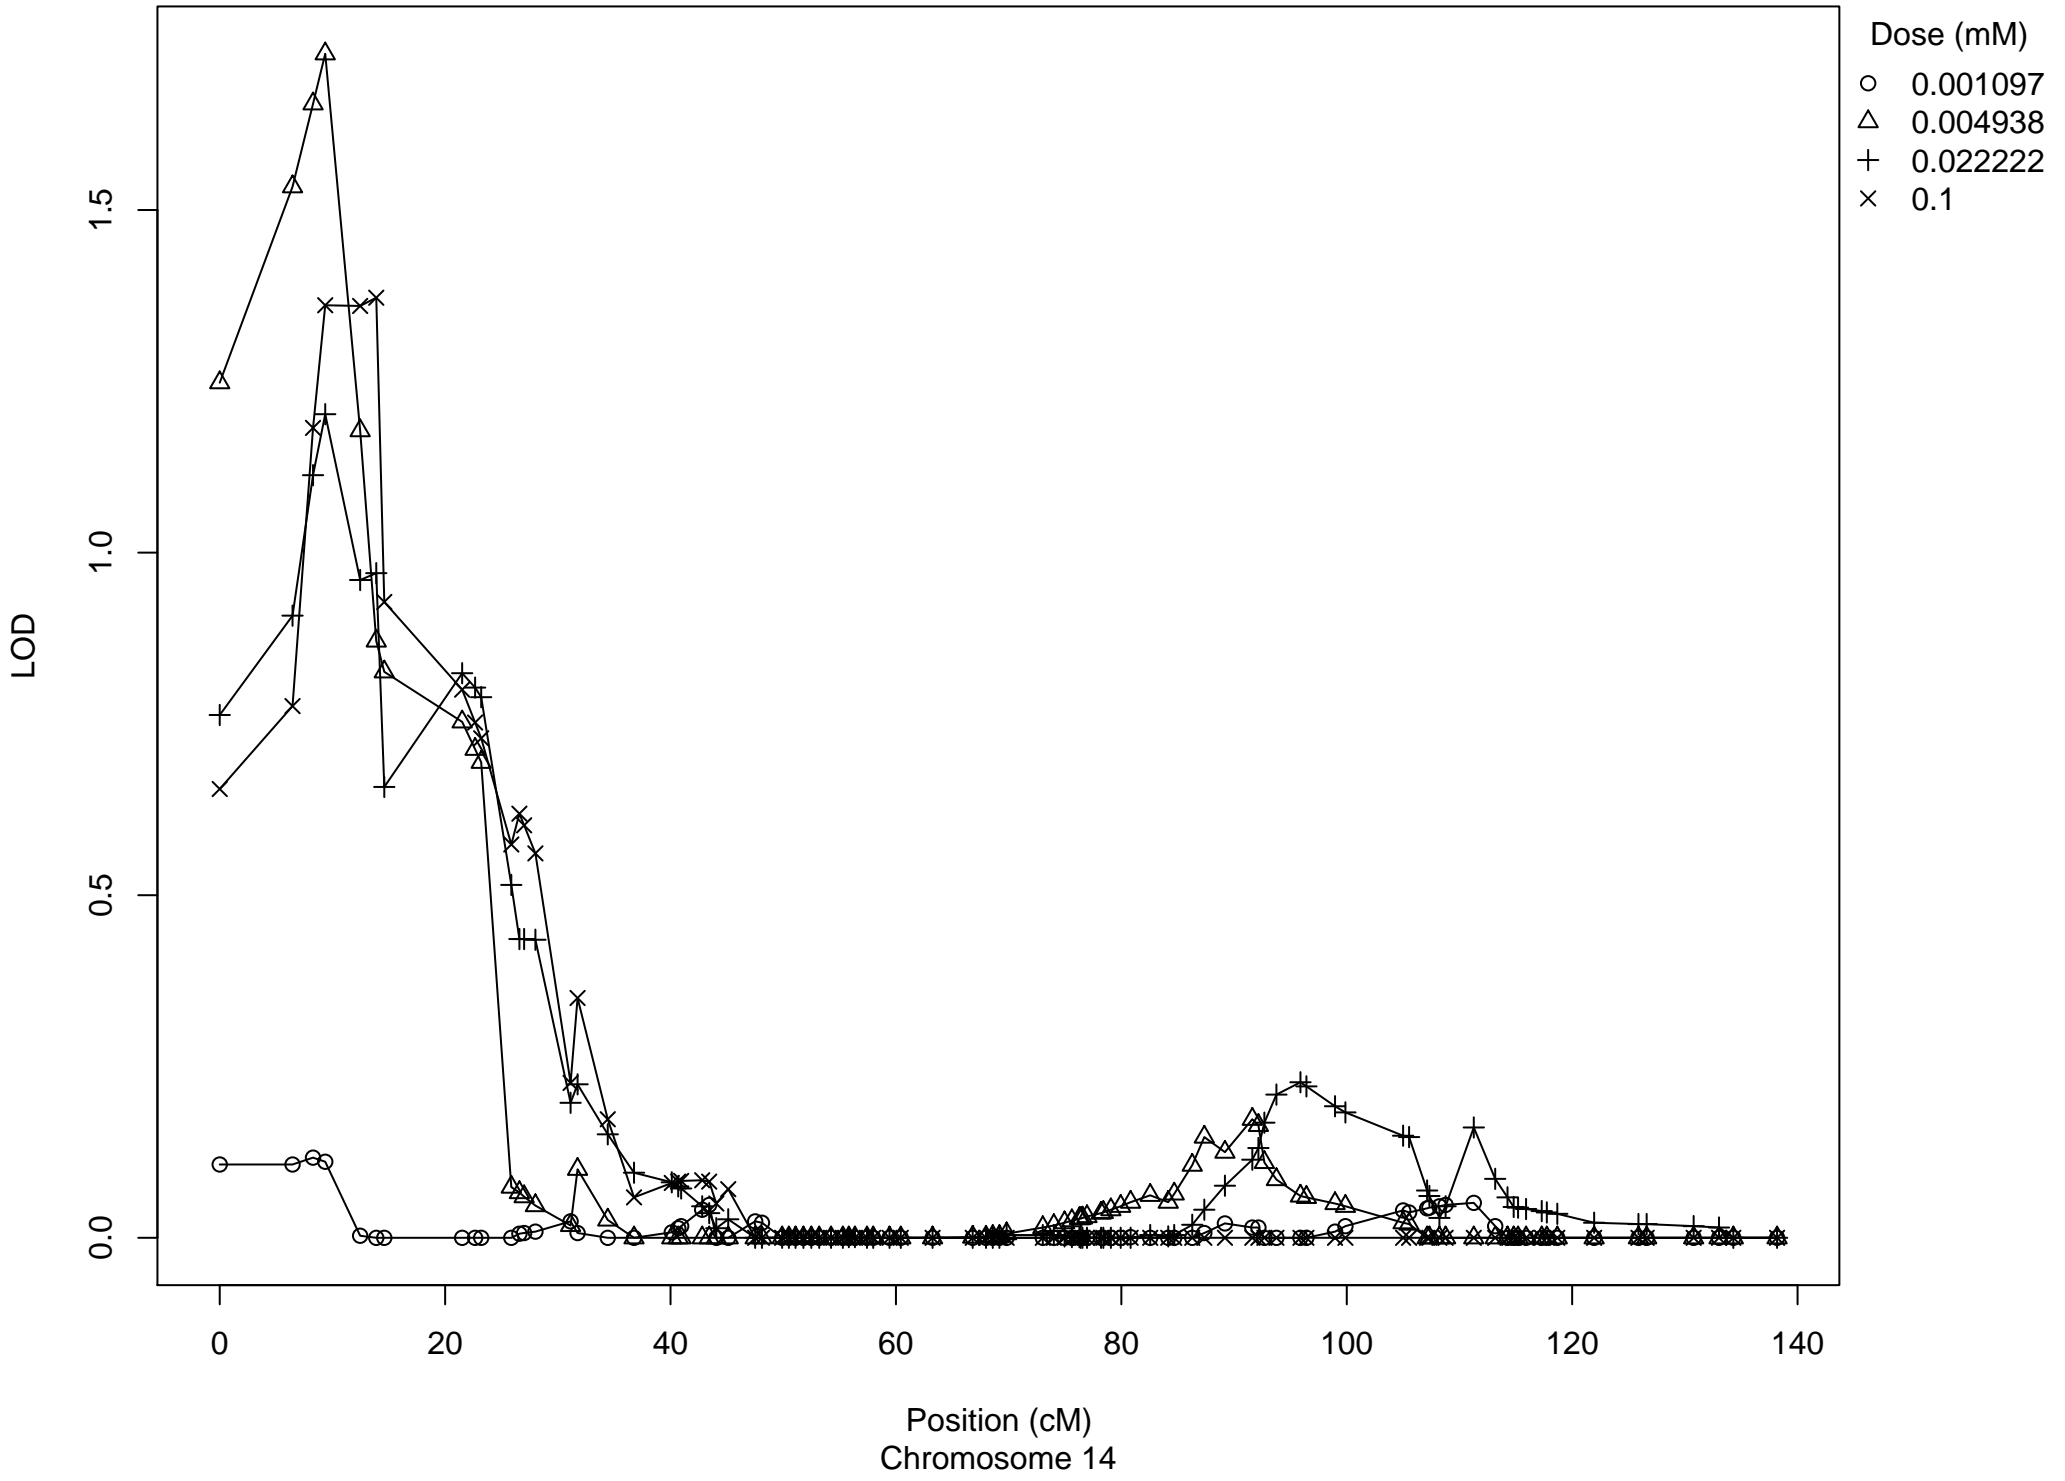

# 5-Fluorouracil (5FU)

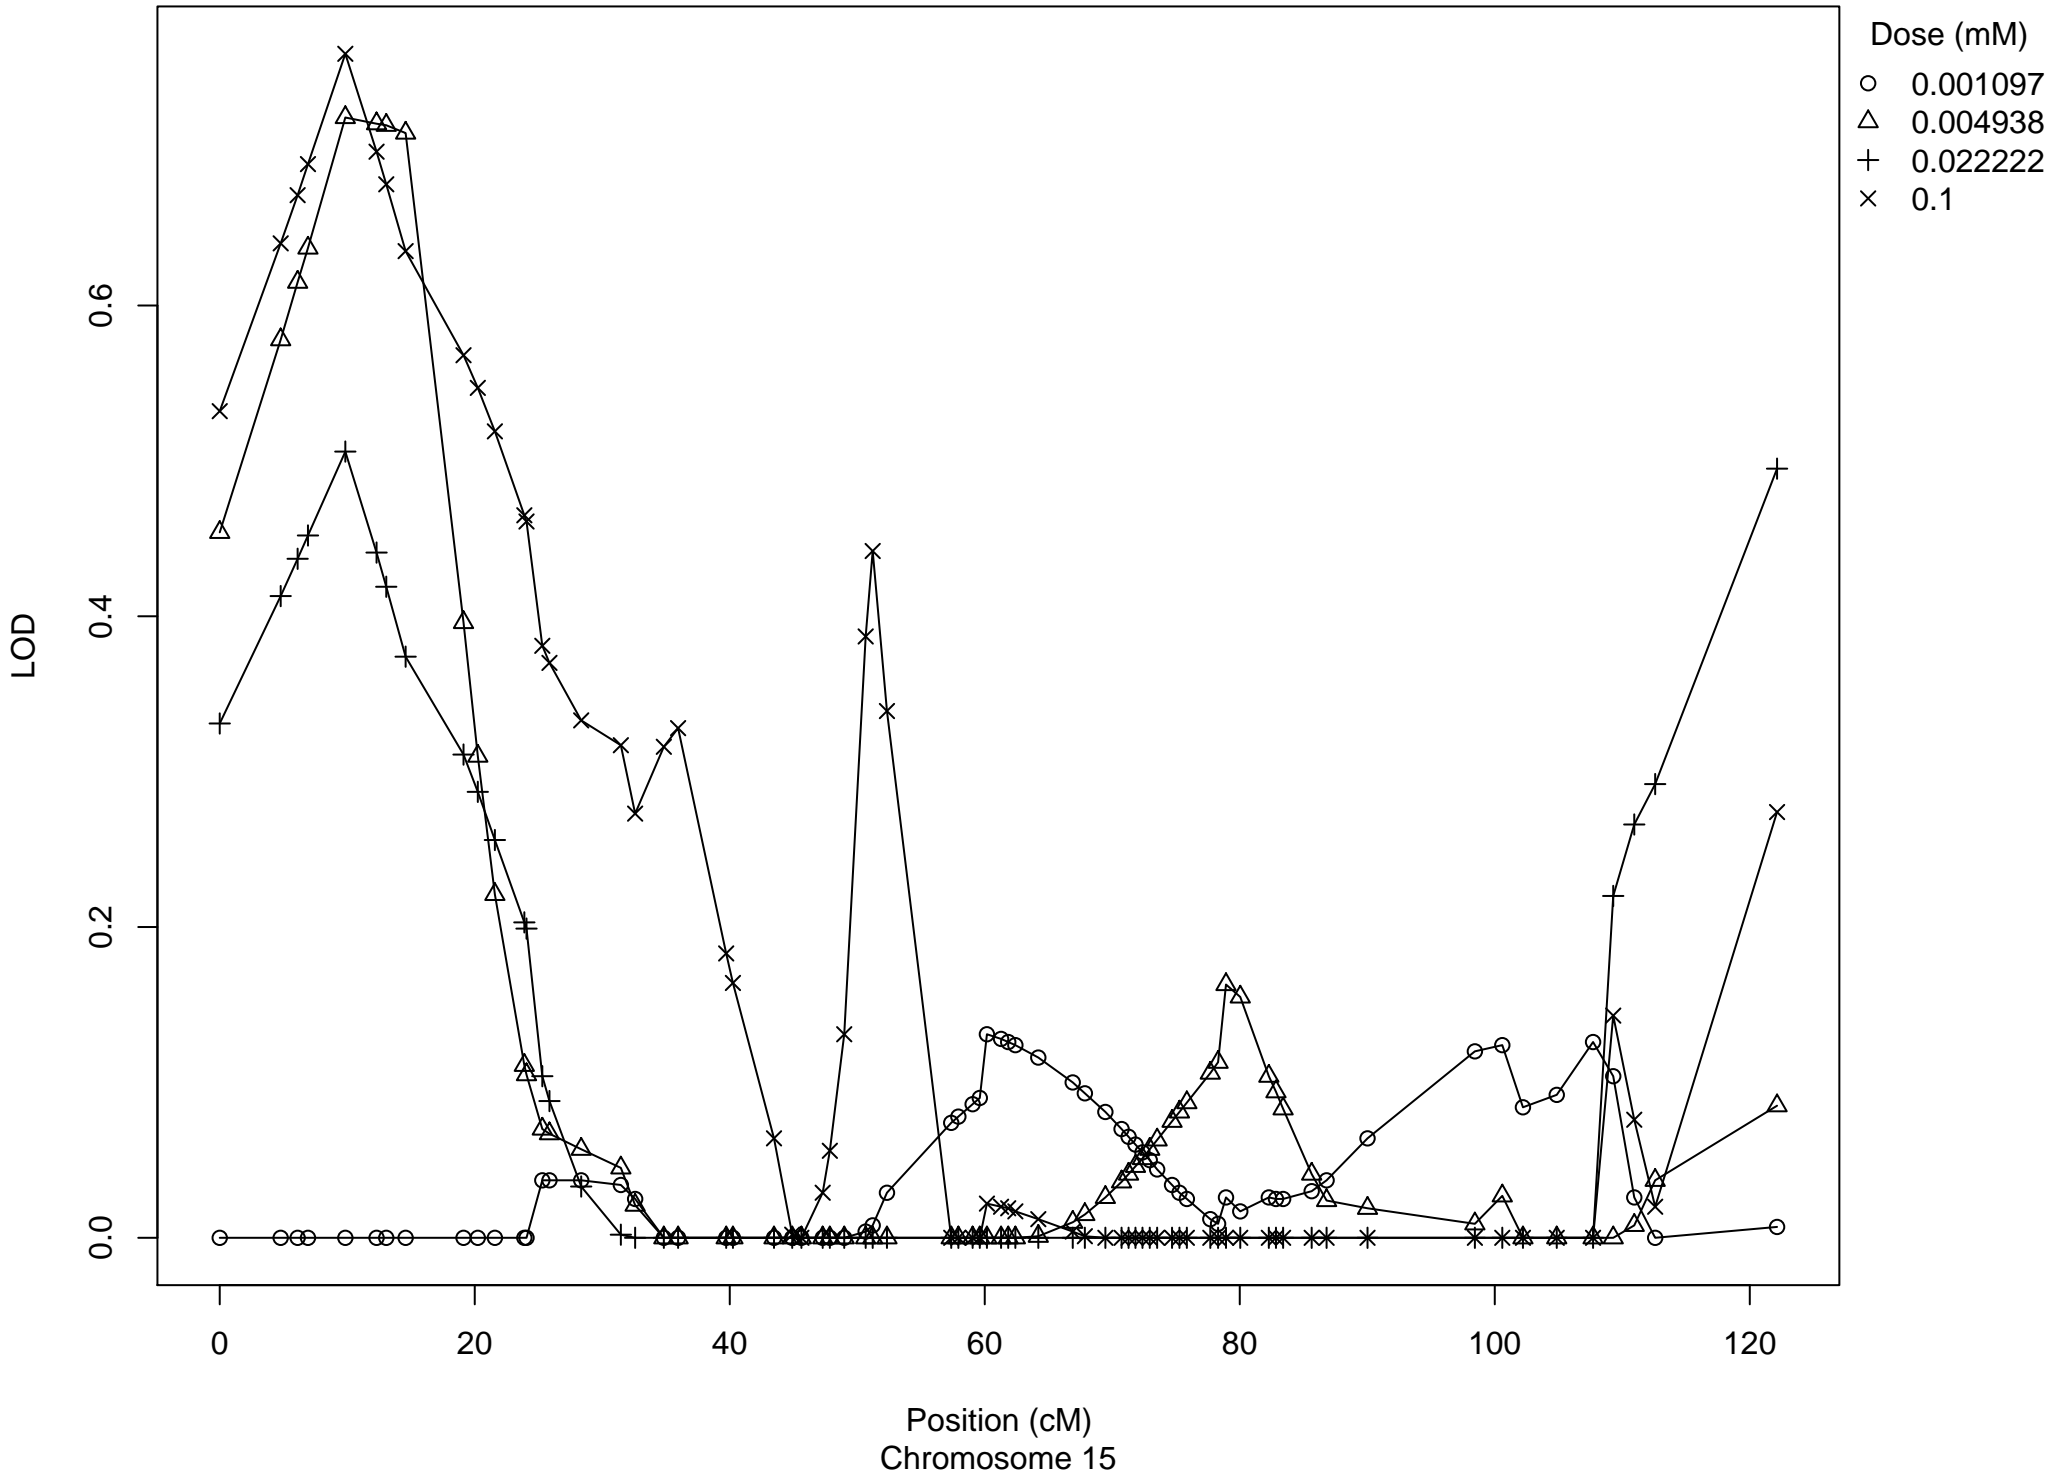

# 5-Fluorouracil (5FU)

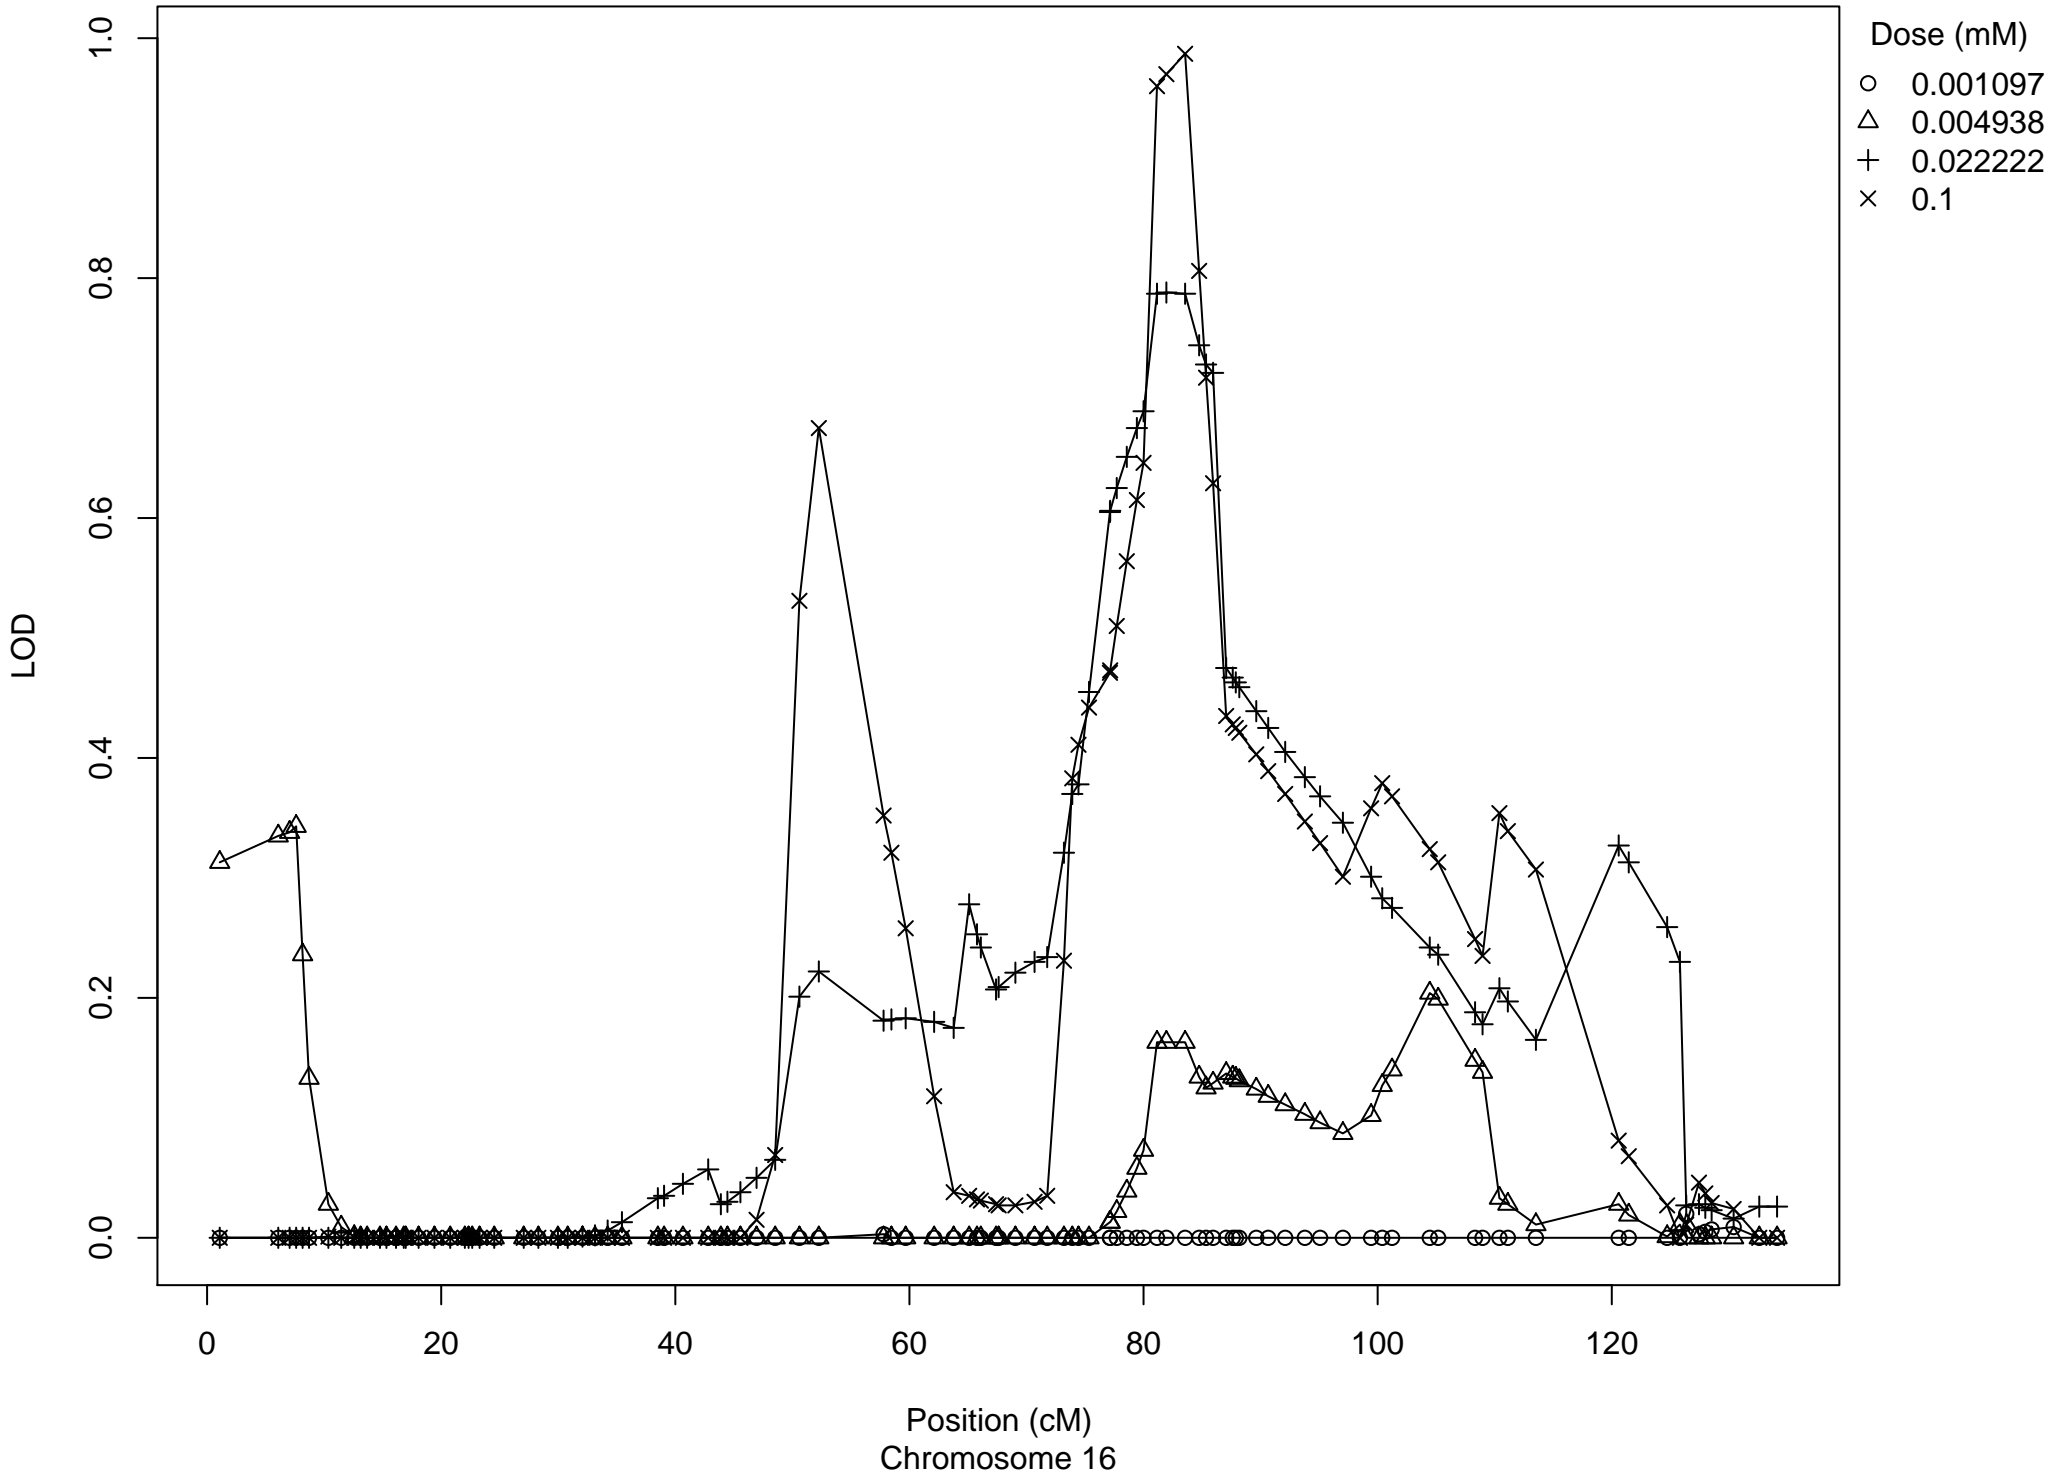



# 5-Fluorouracil (5FU)

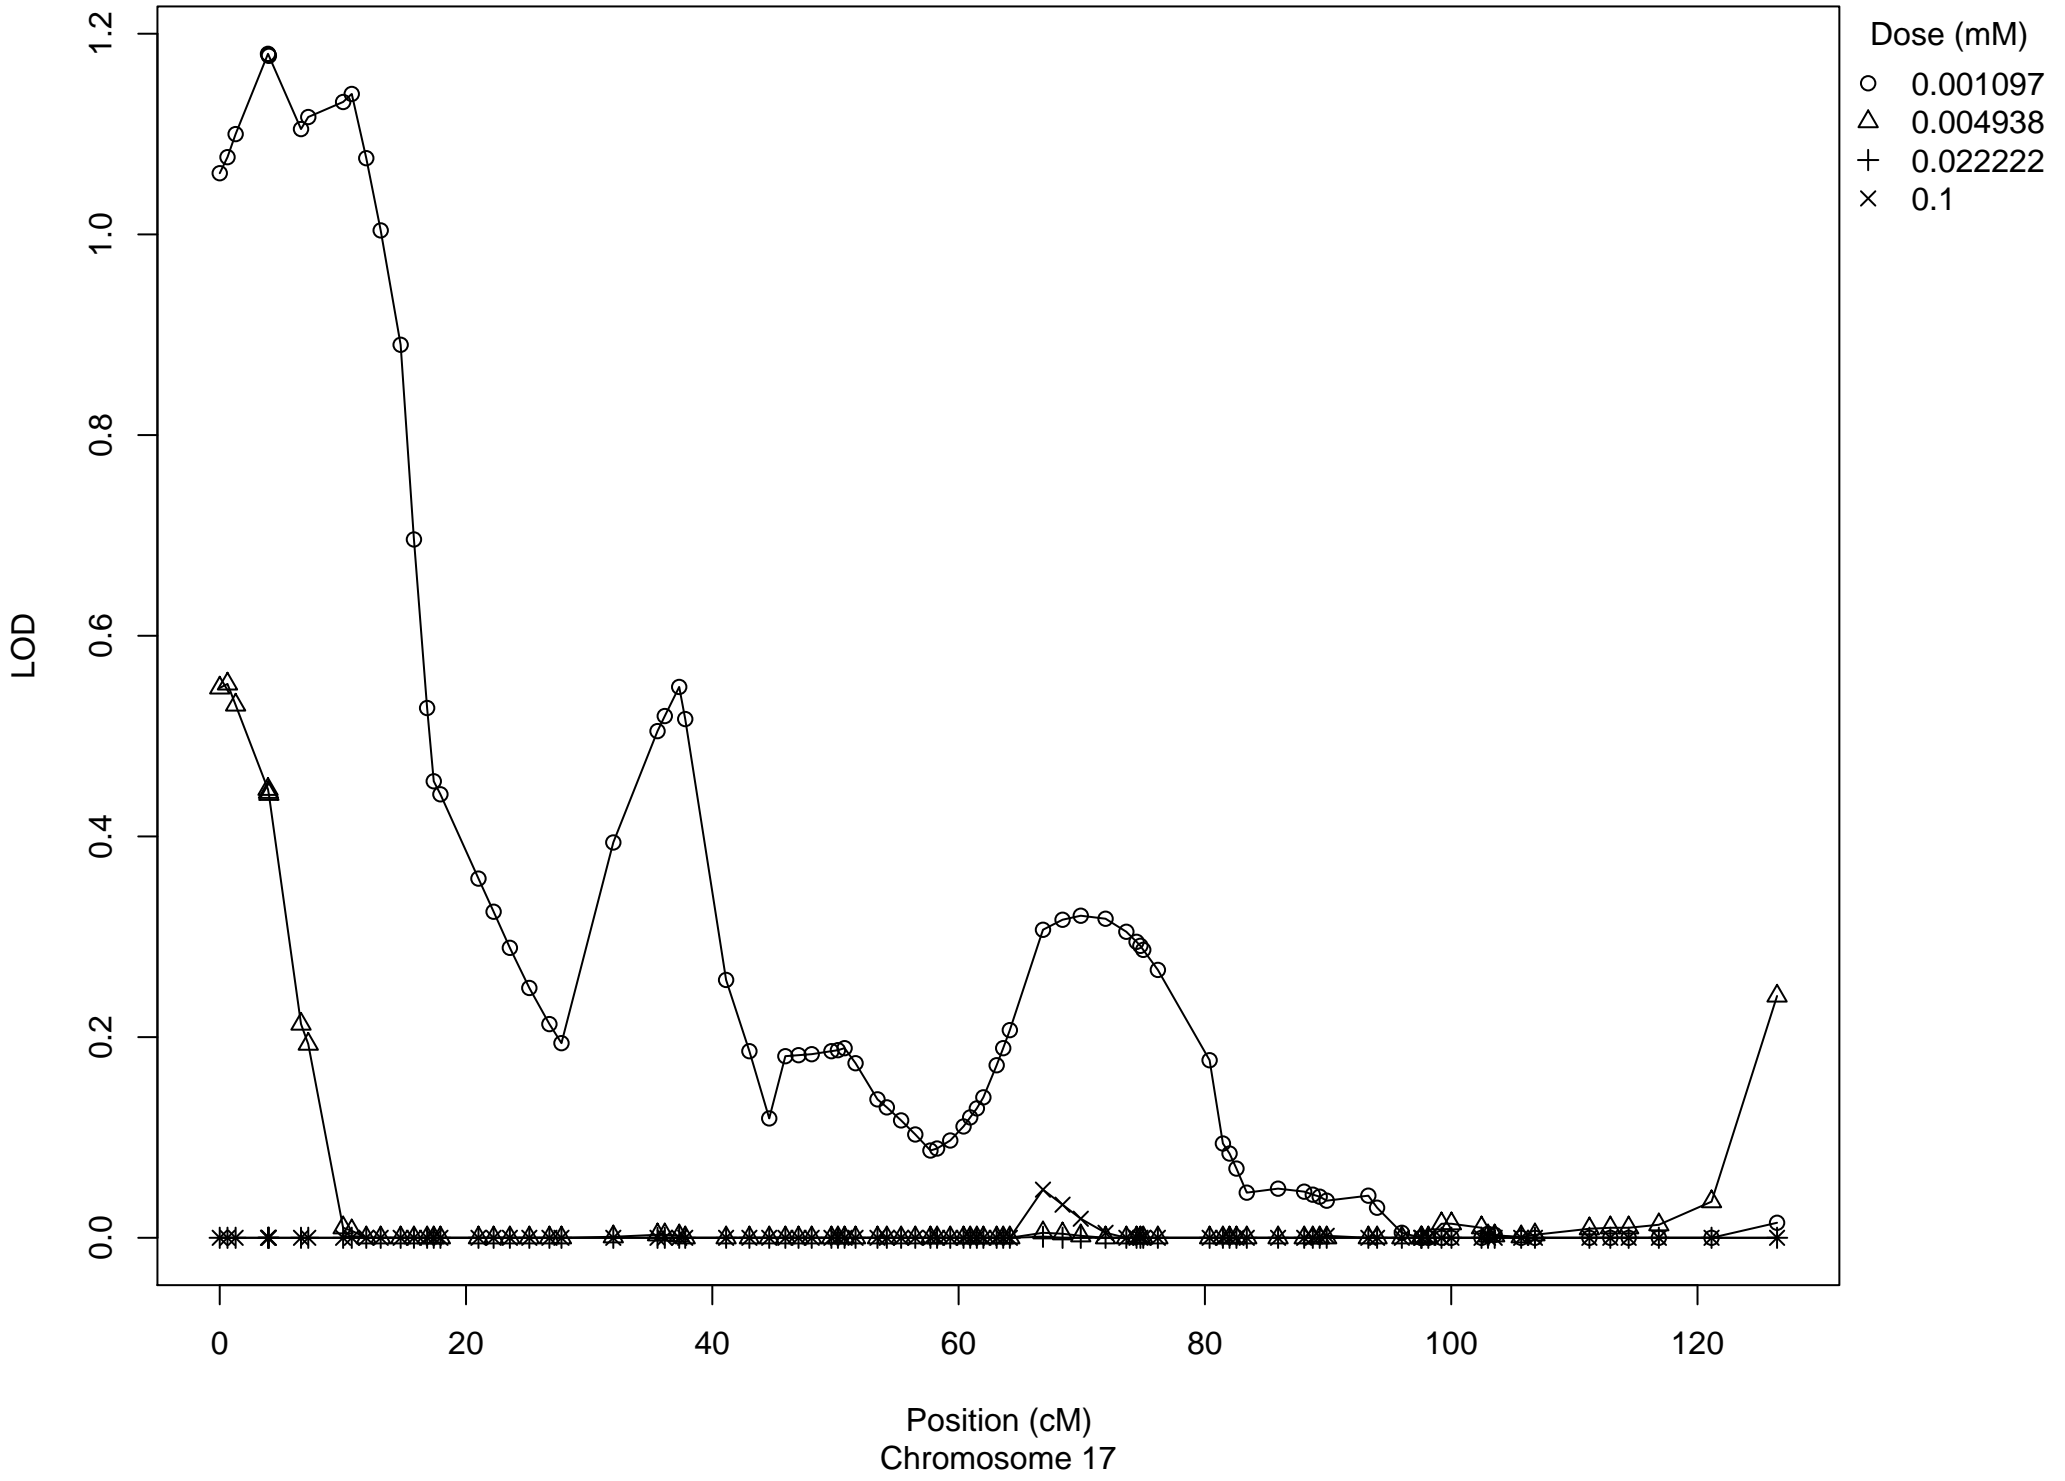

# 5-Fluorouracil (5FU)

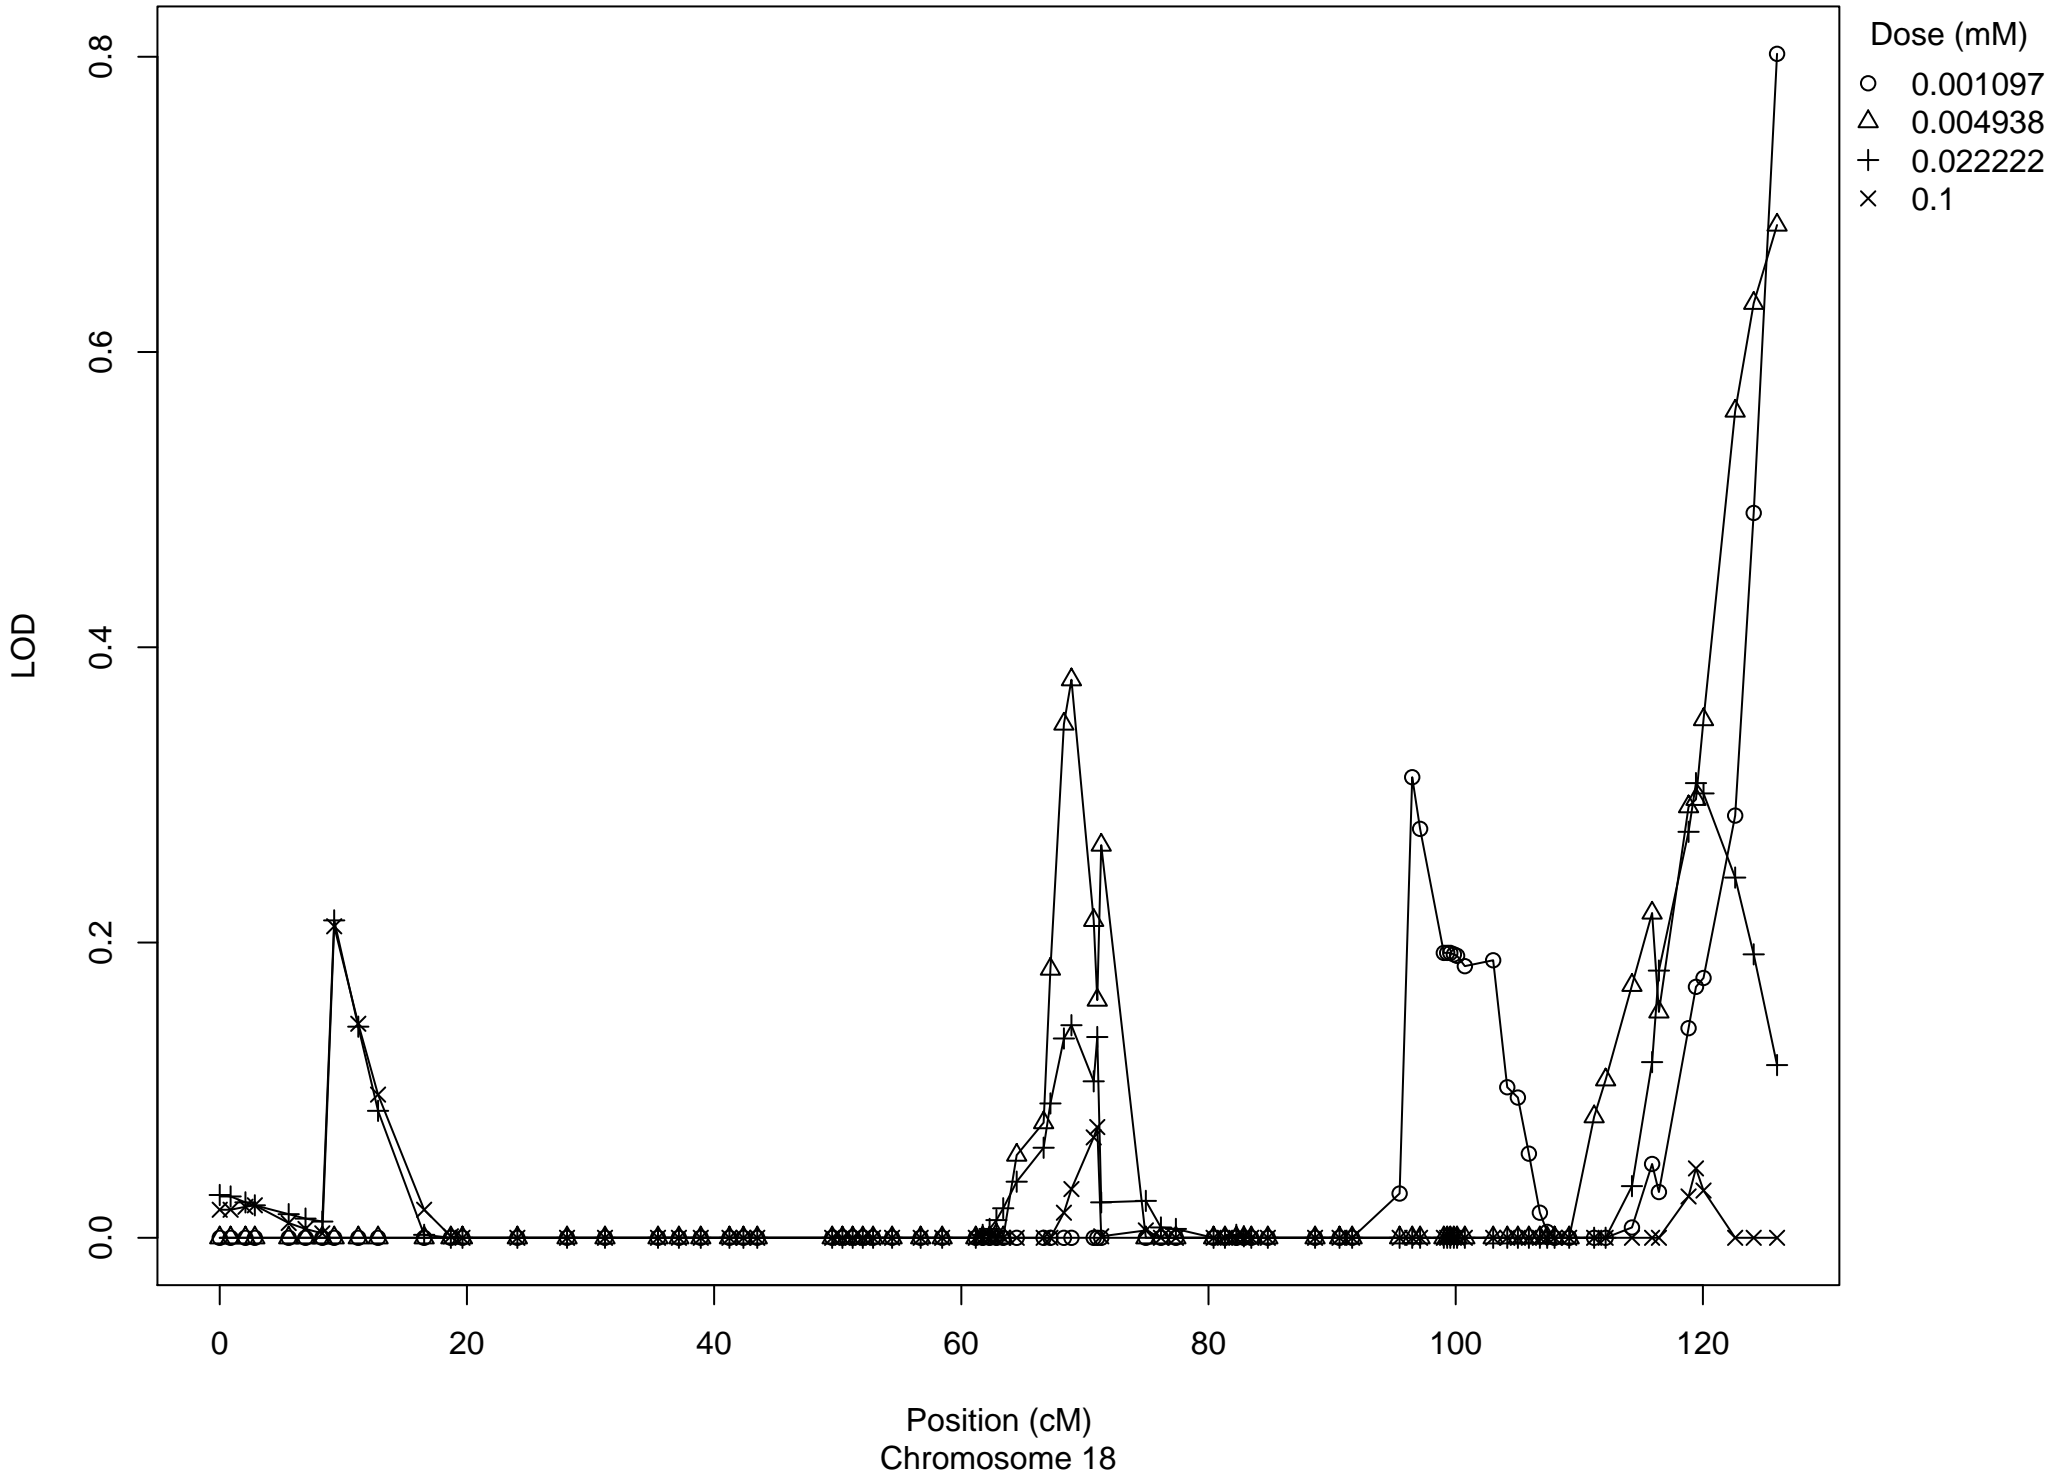

# 5-Fluorouracil (5FU)

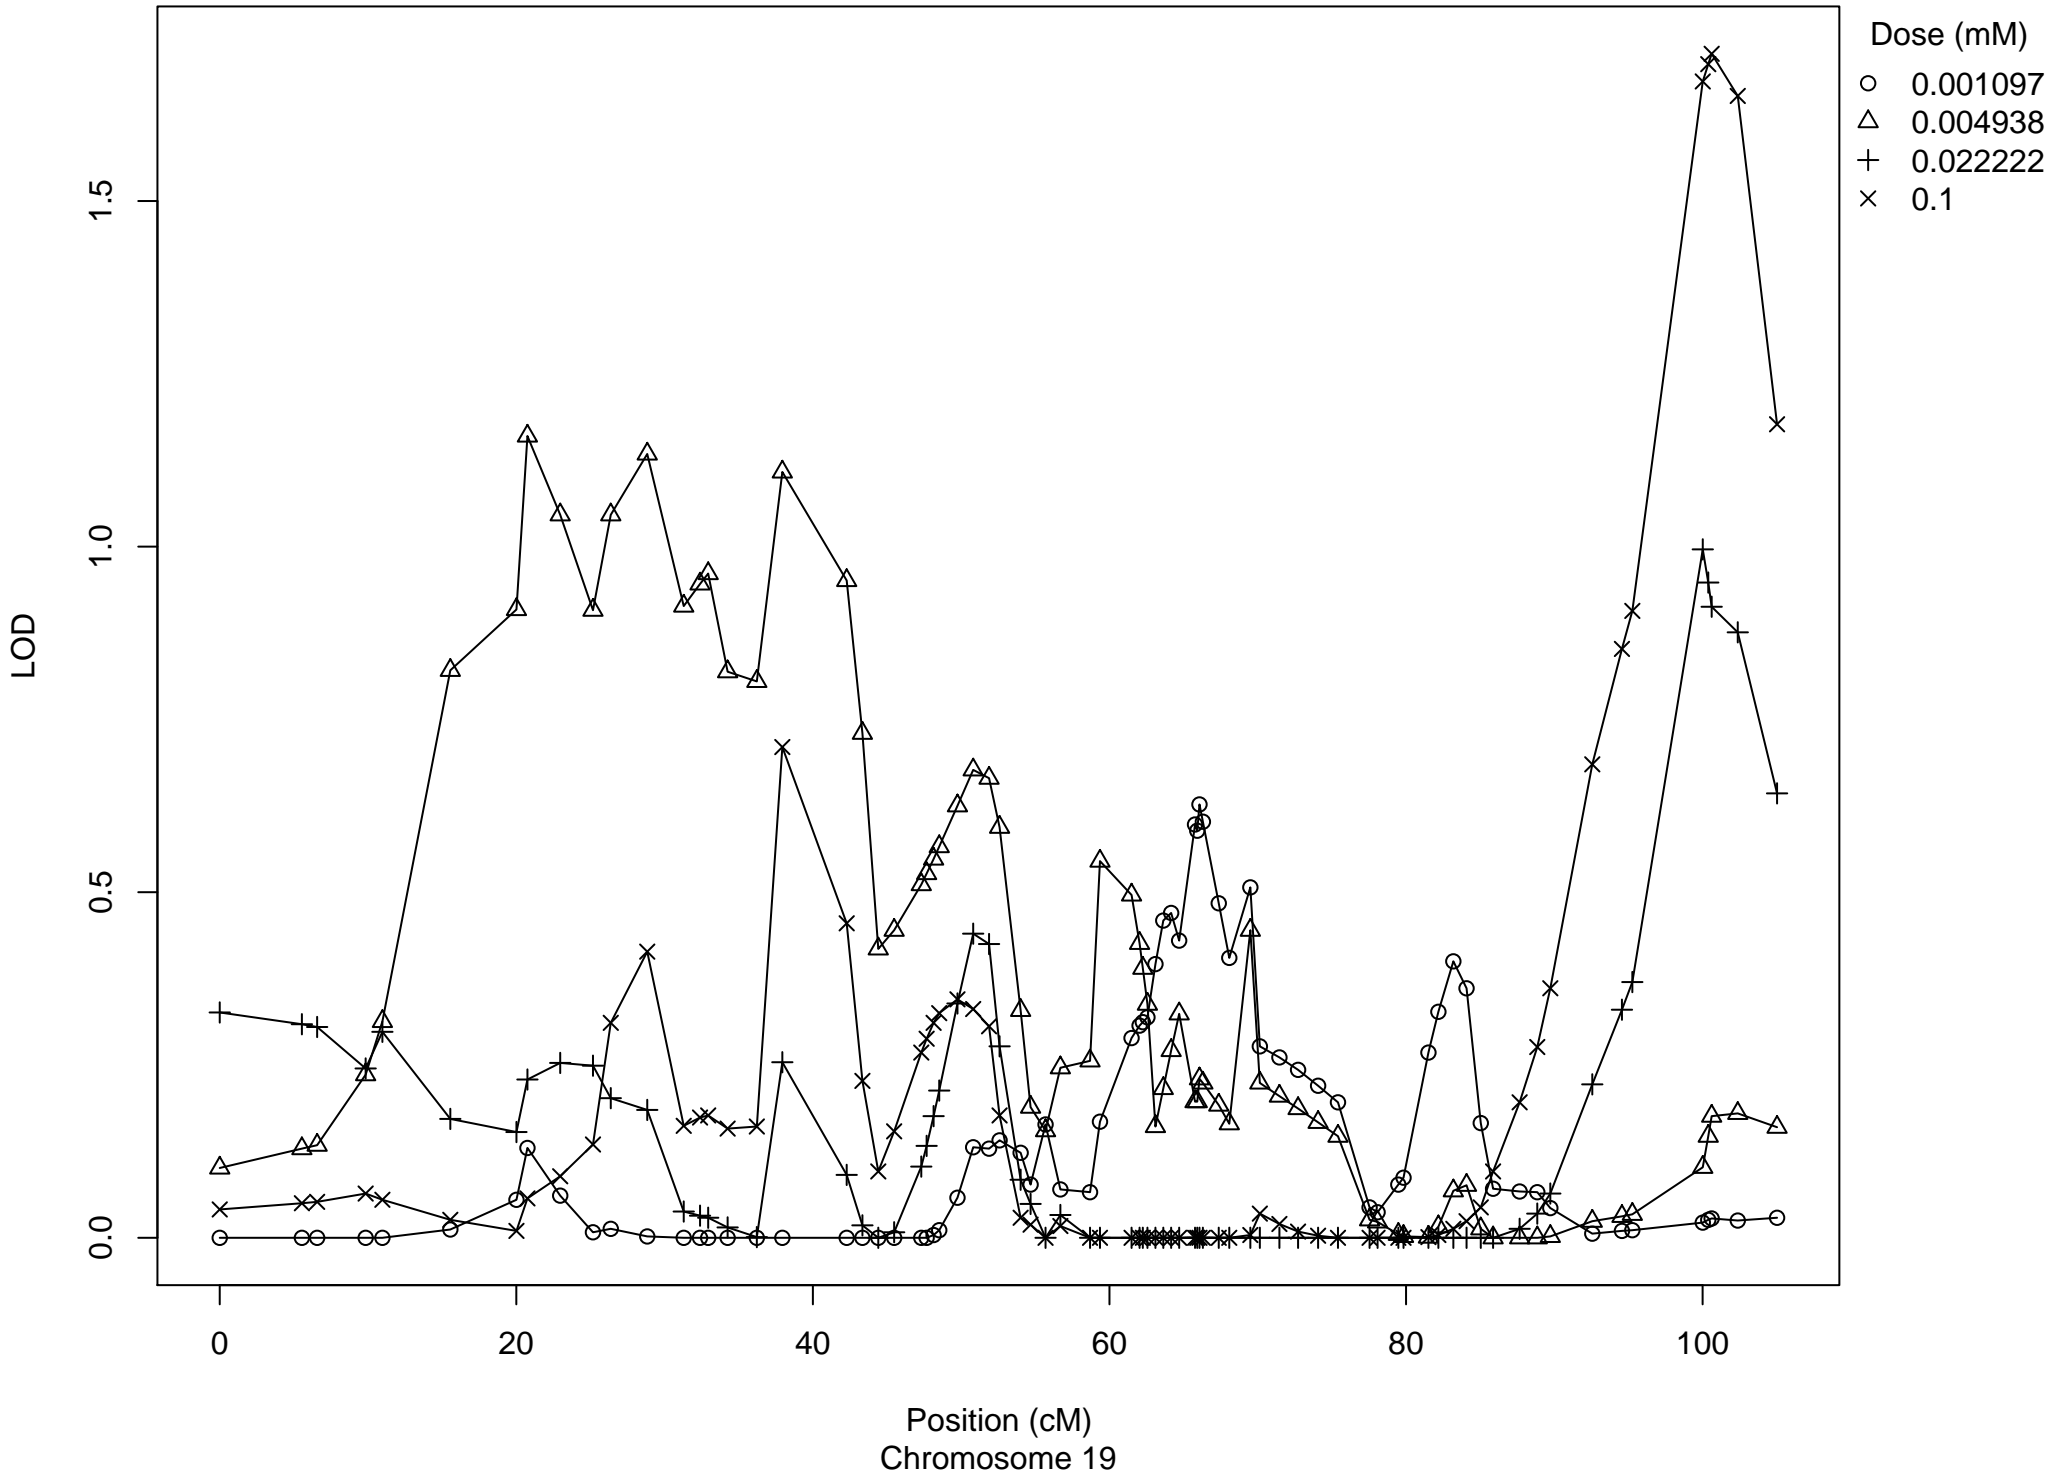

# 5-Fluorouracil (5FU)

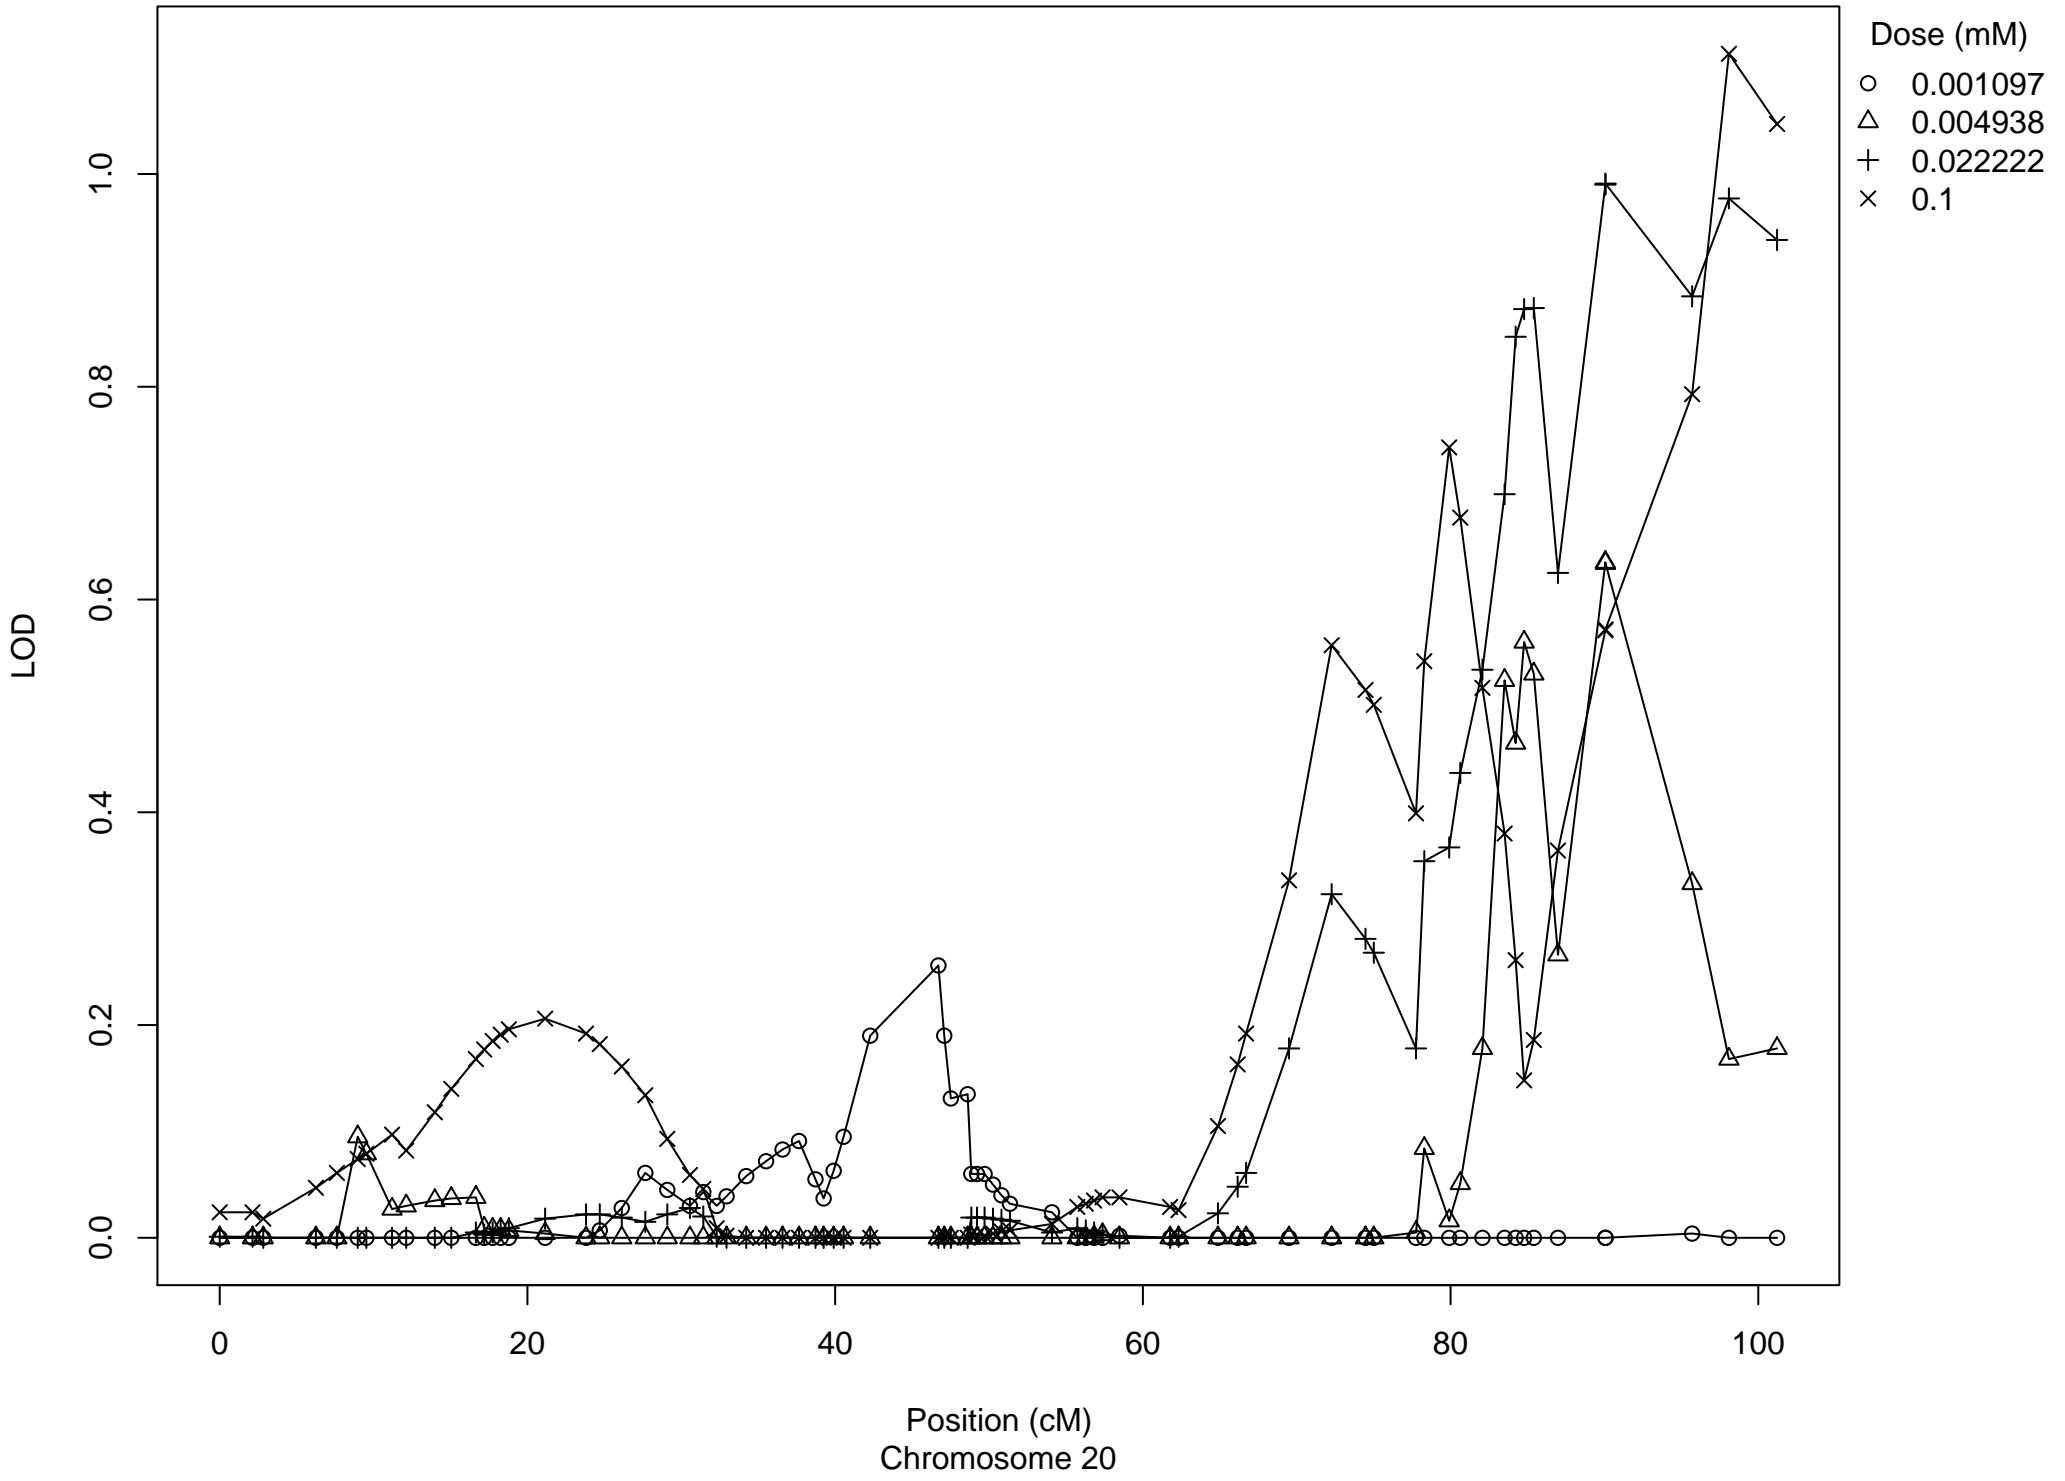

# 5-Fluorouracil (5FU)

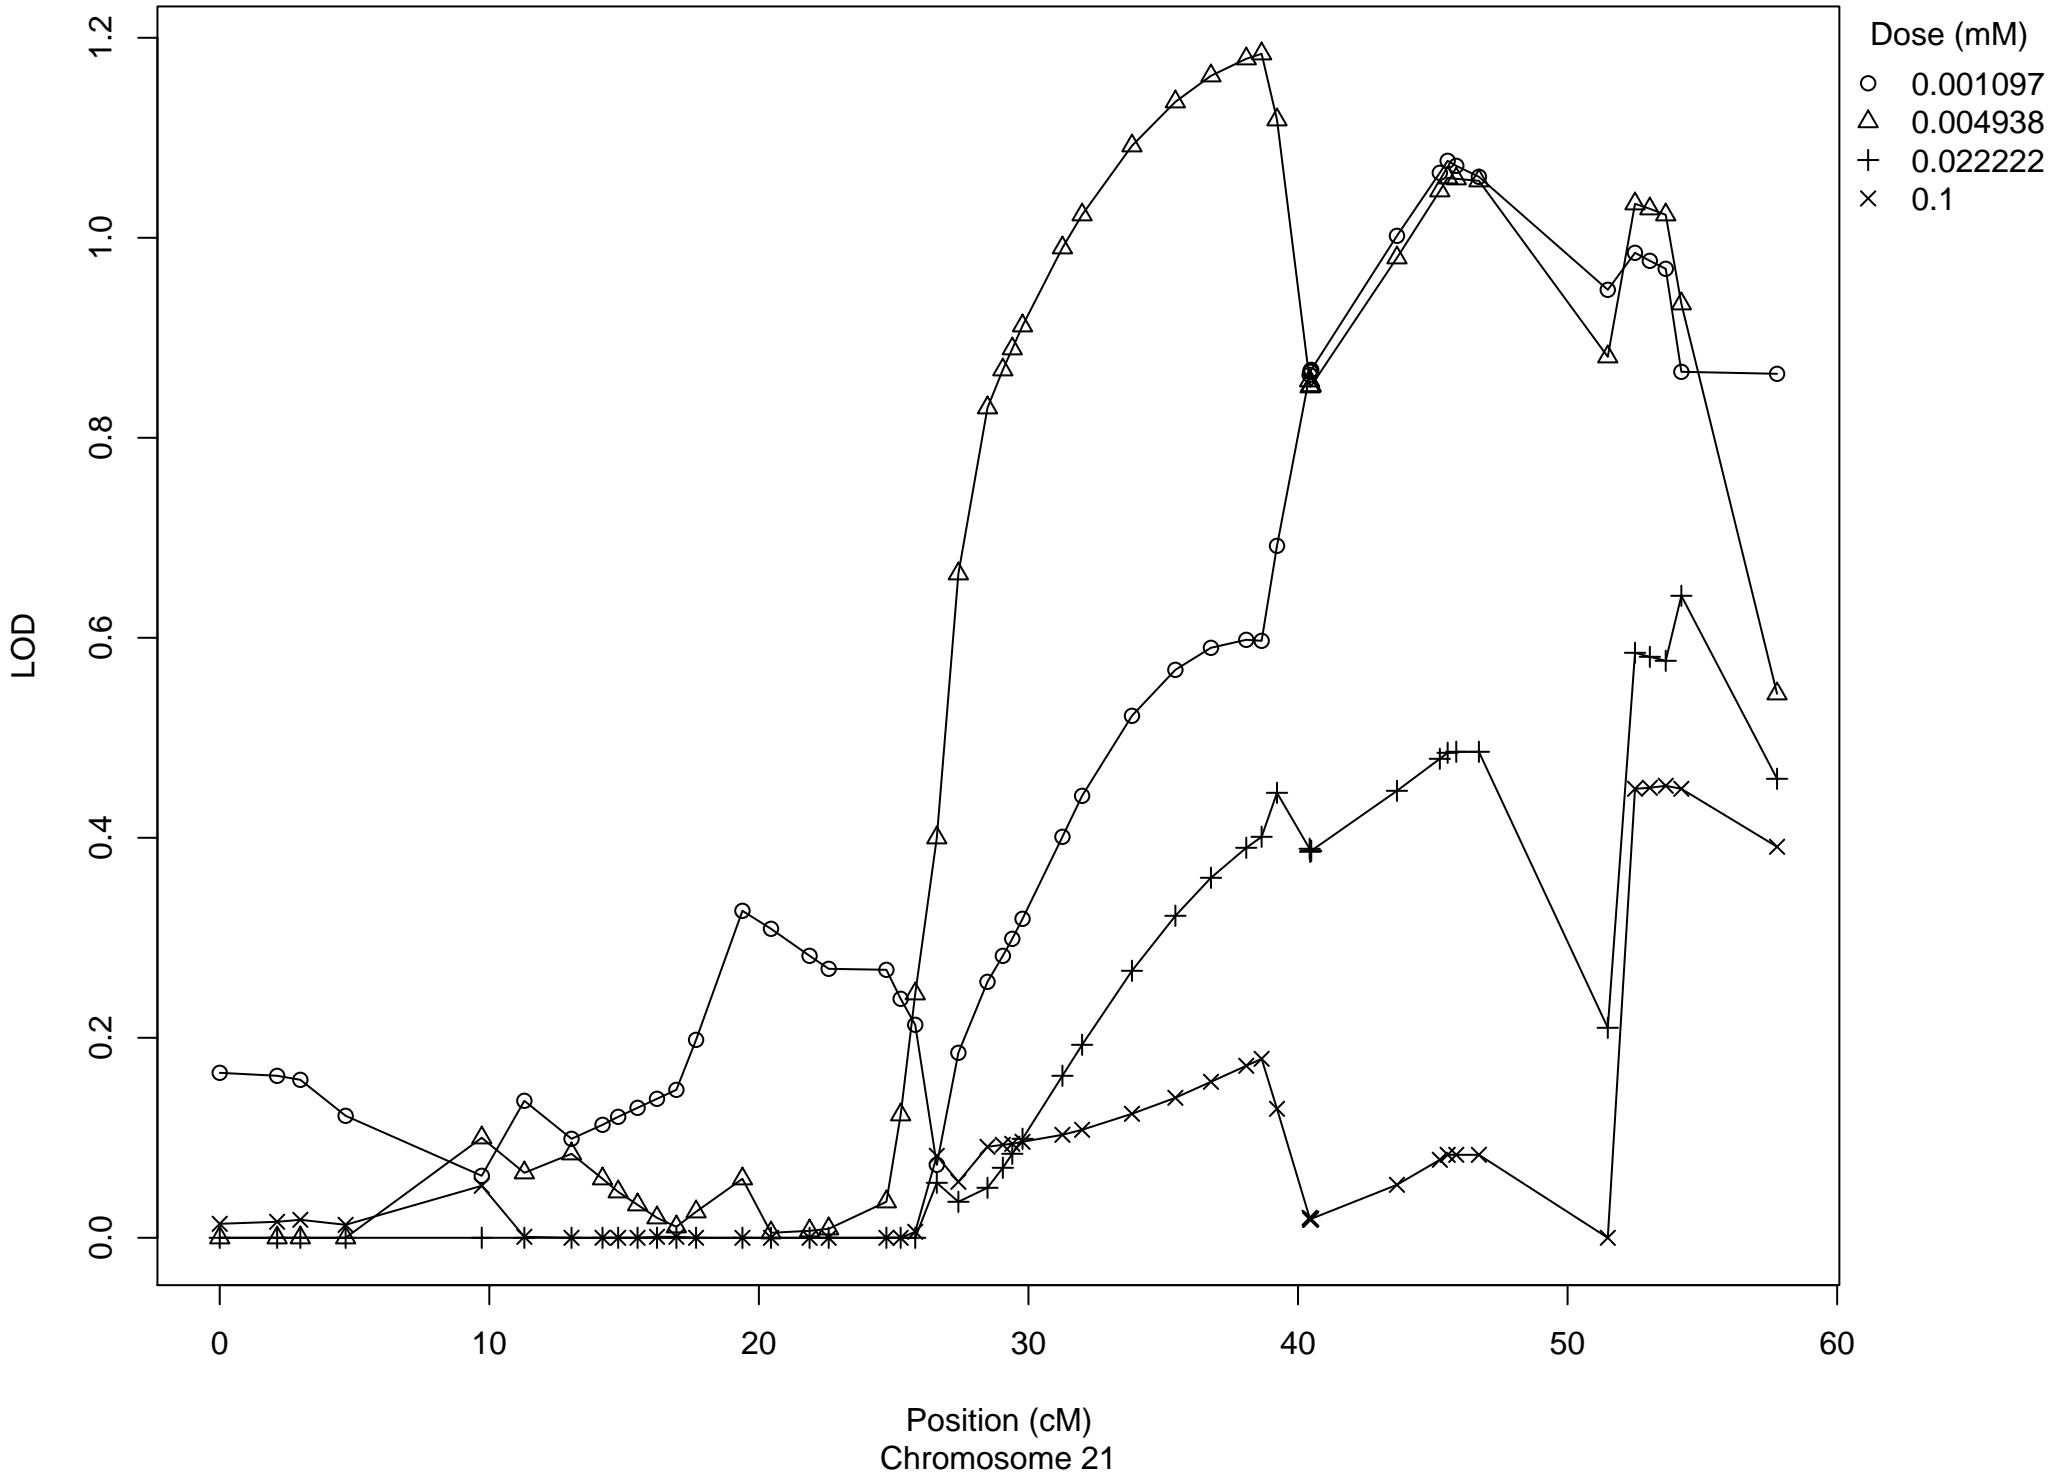

# 5-Fluorouracil (5FU)

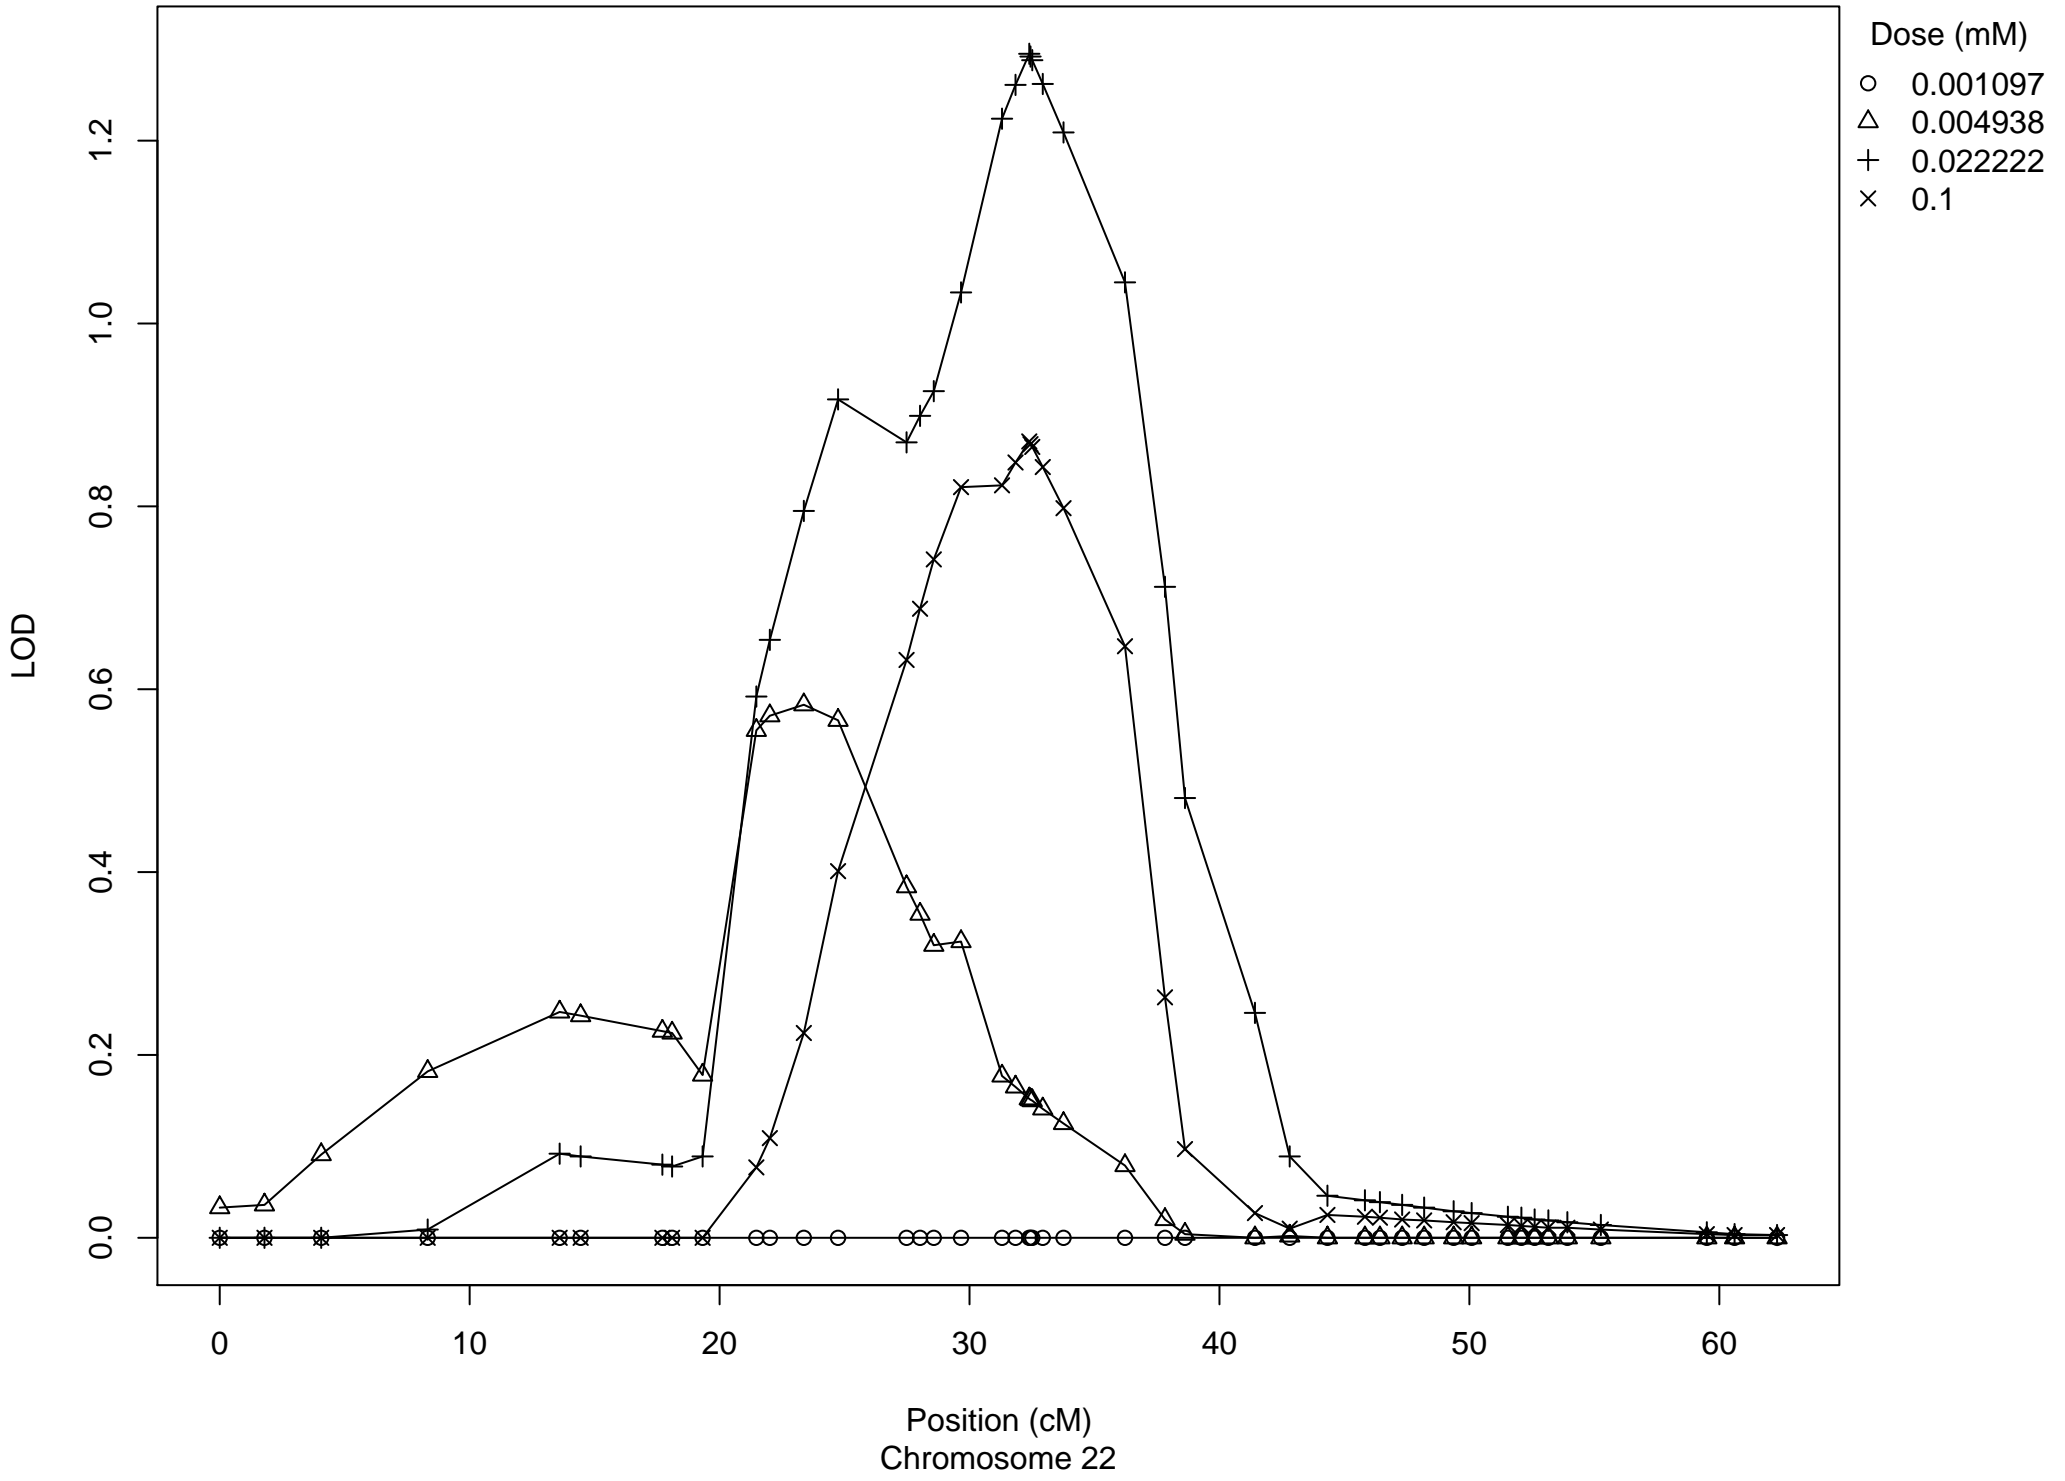

# Arsenic III Oxide (Arsen)

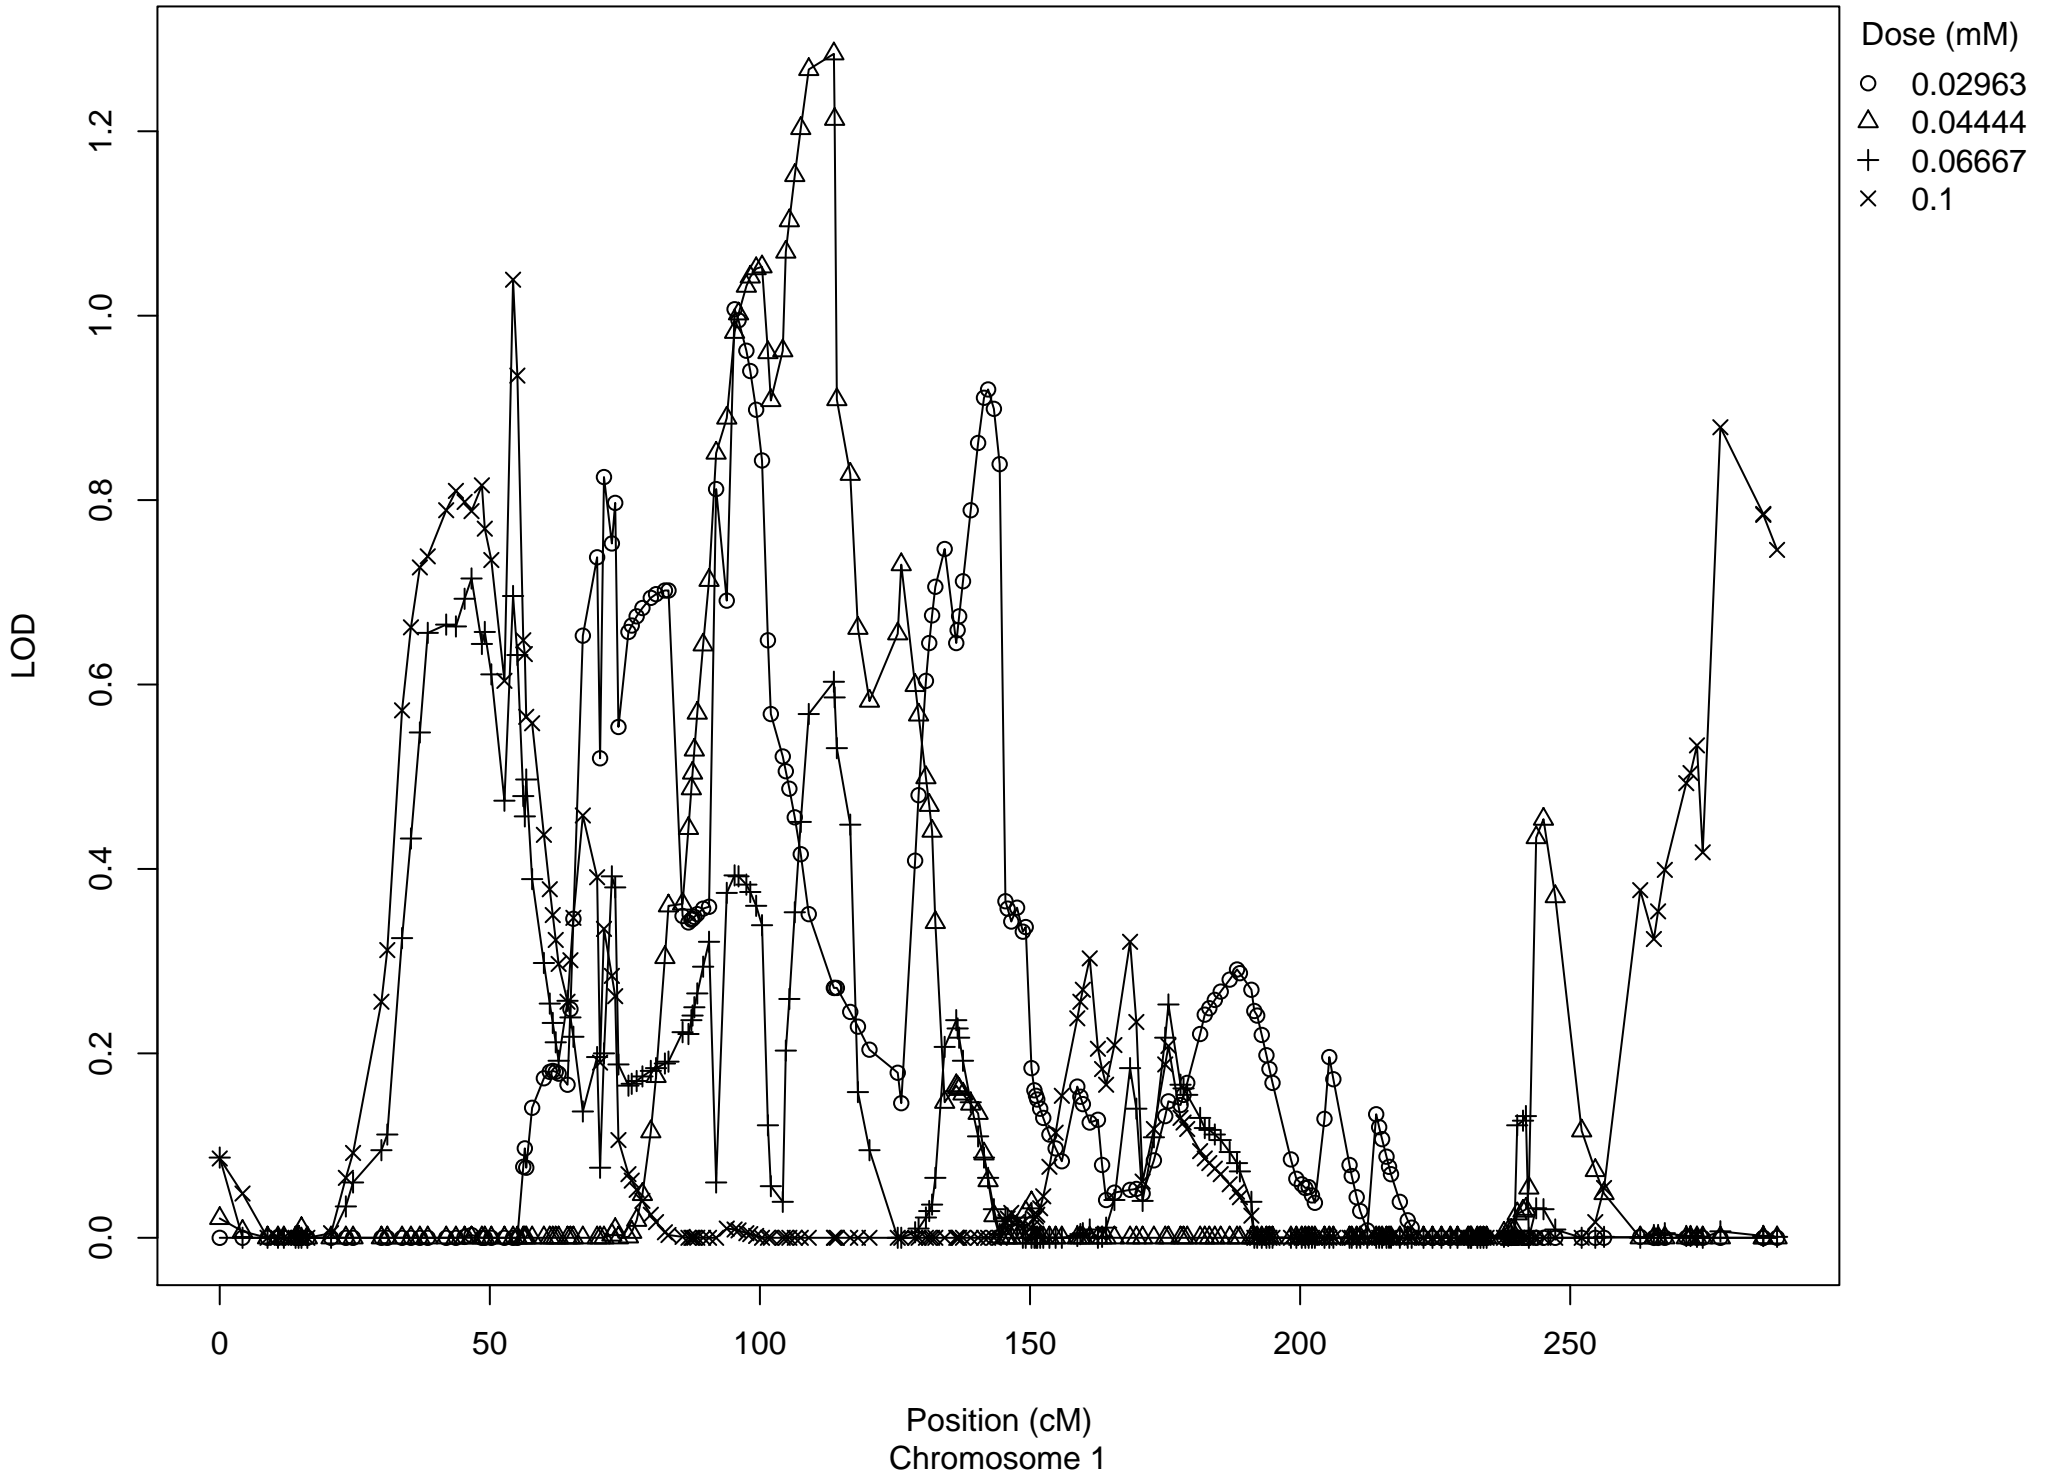

# Arsenic III Oxide (Arsen)

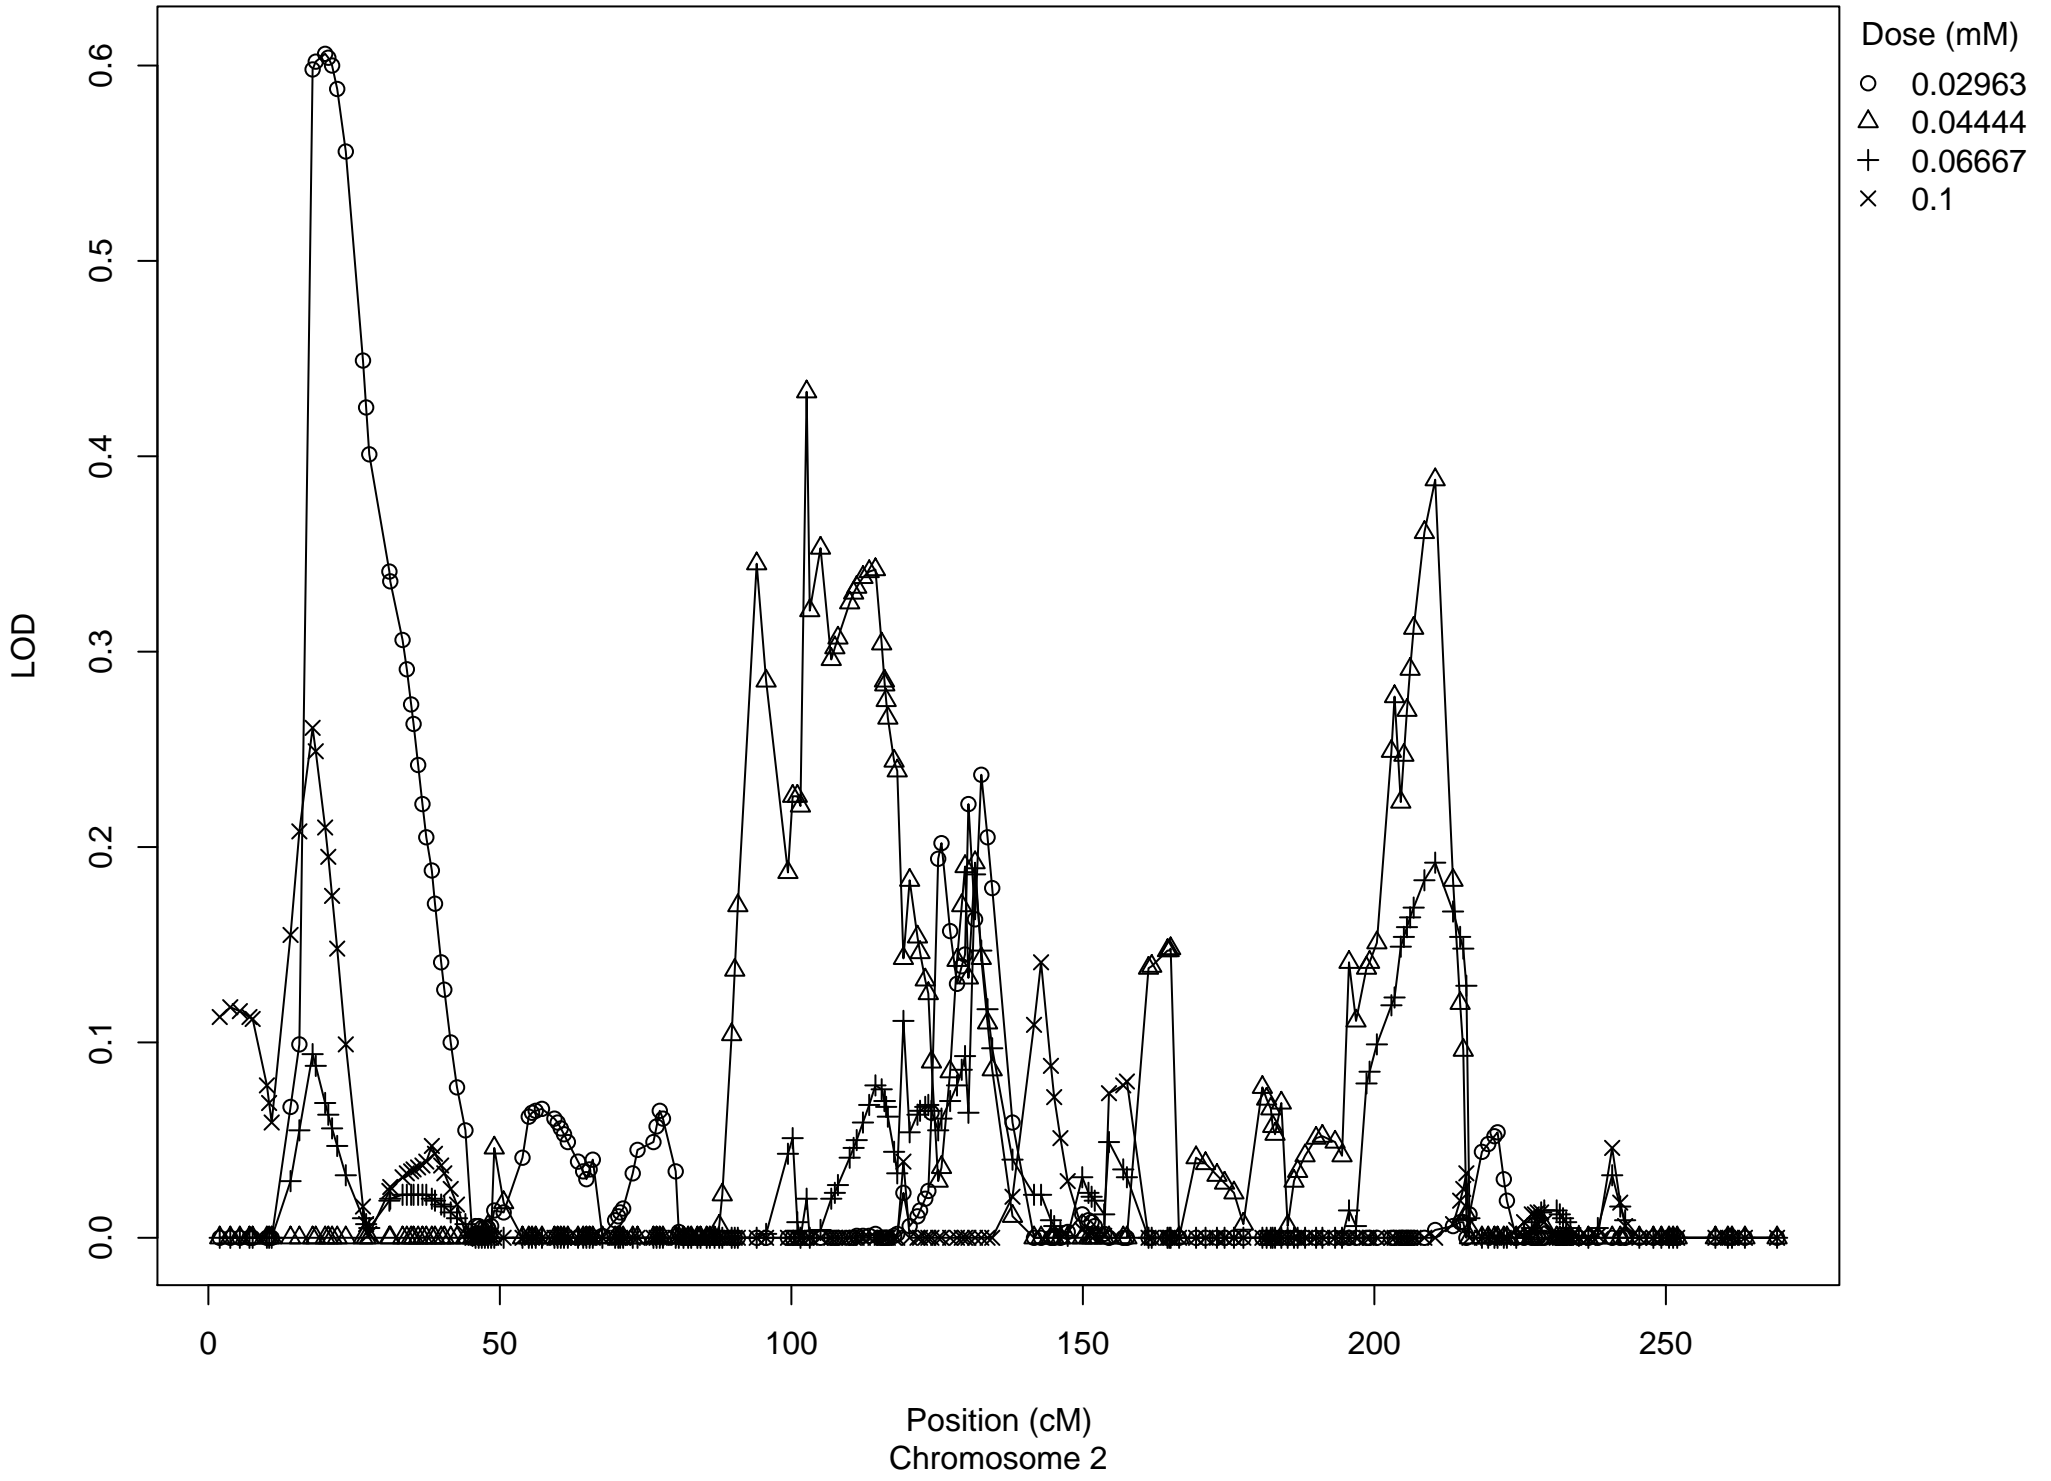



# Arsenic III Oxide (Arsen)

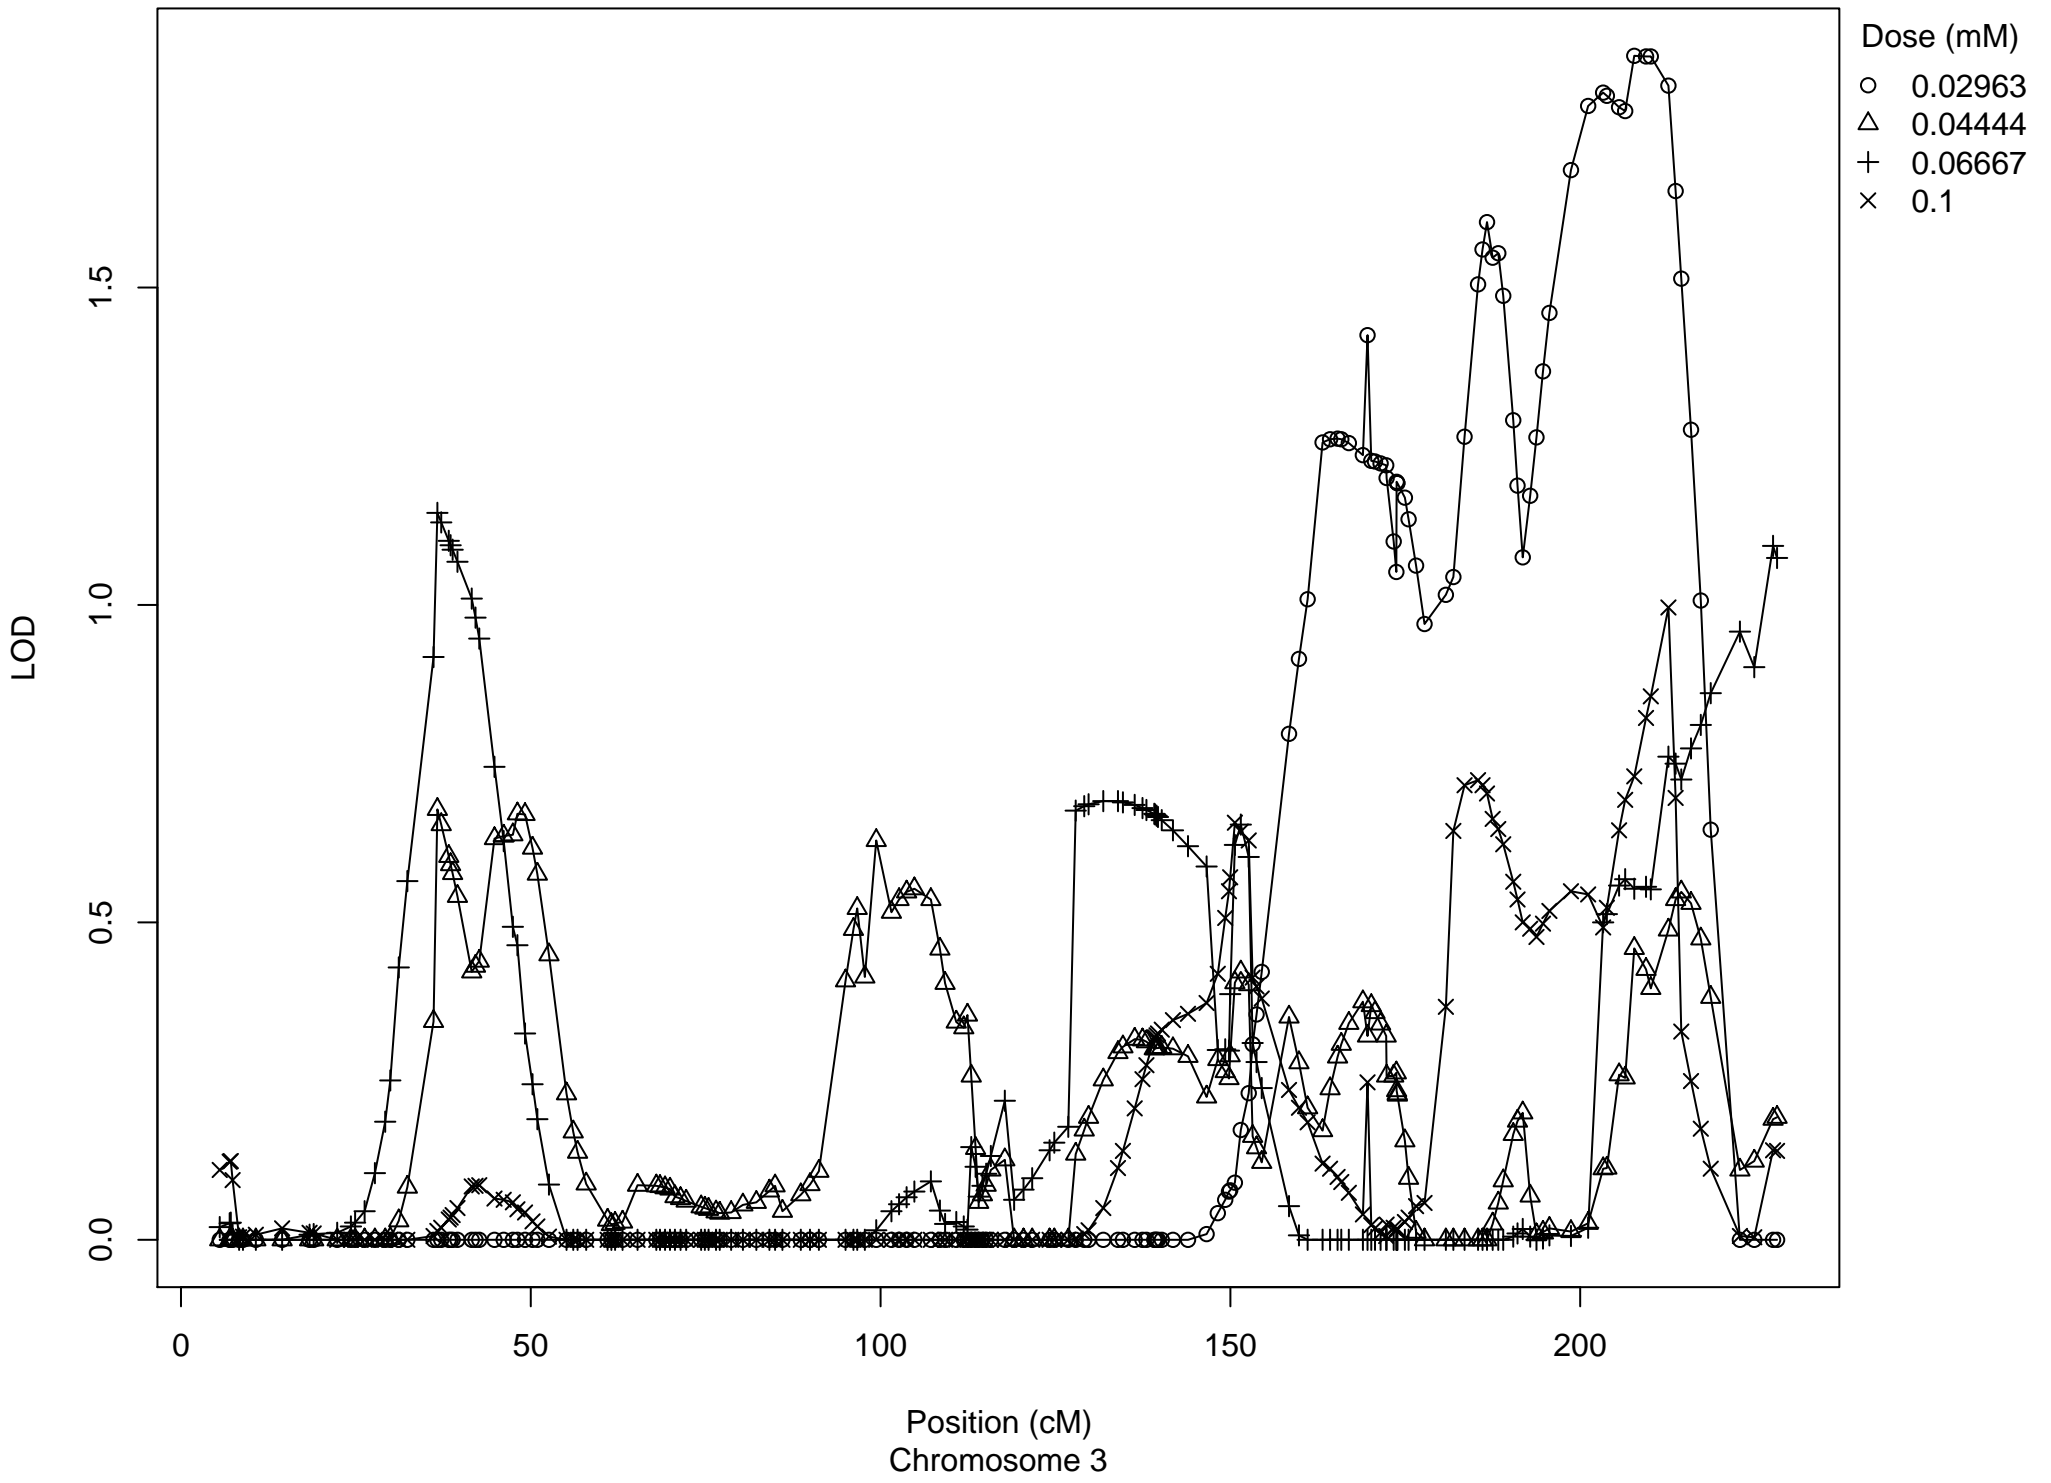

# Arsenic III Oxide (Arsen)

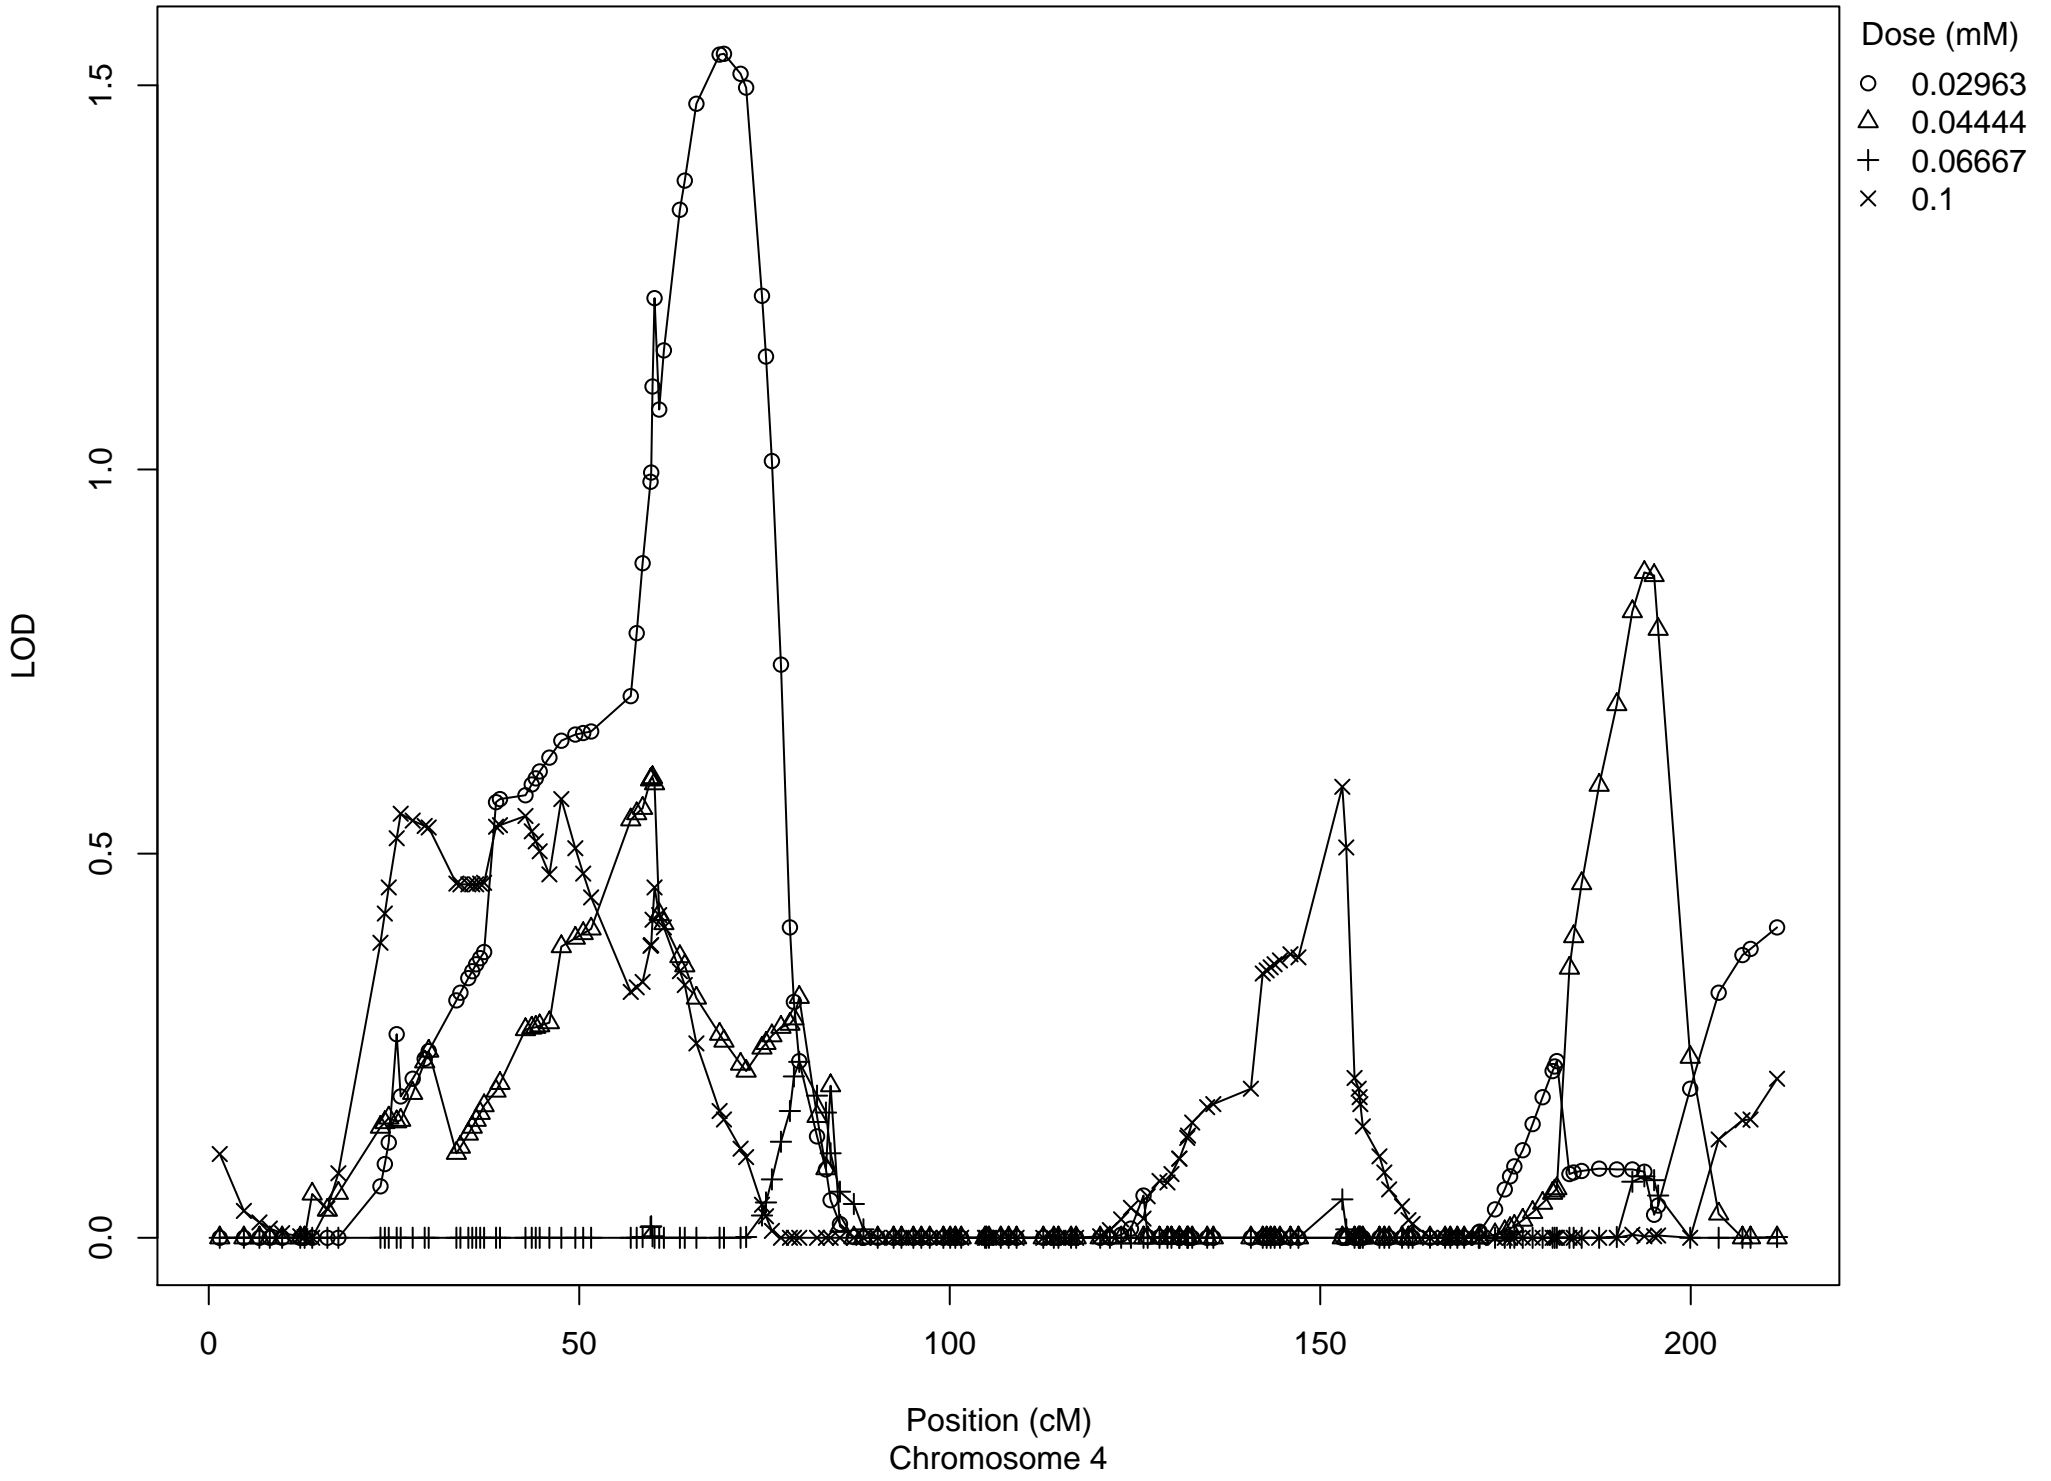

# Arsenic III Oxide (Arsen)

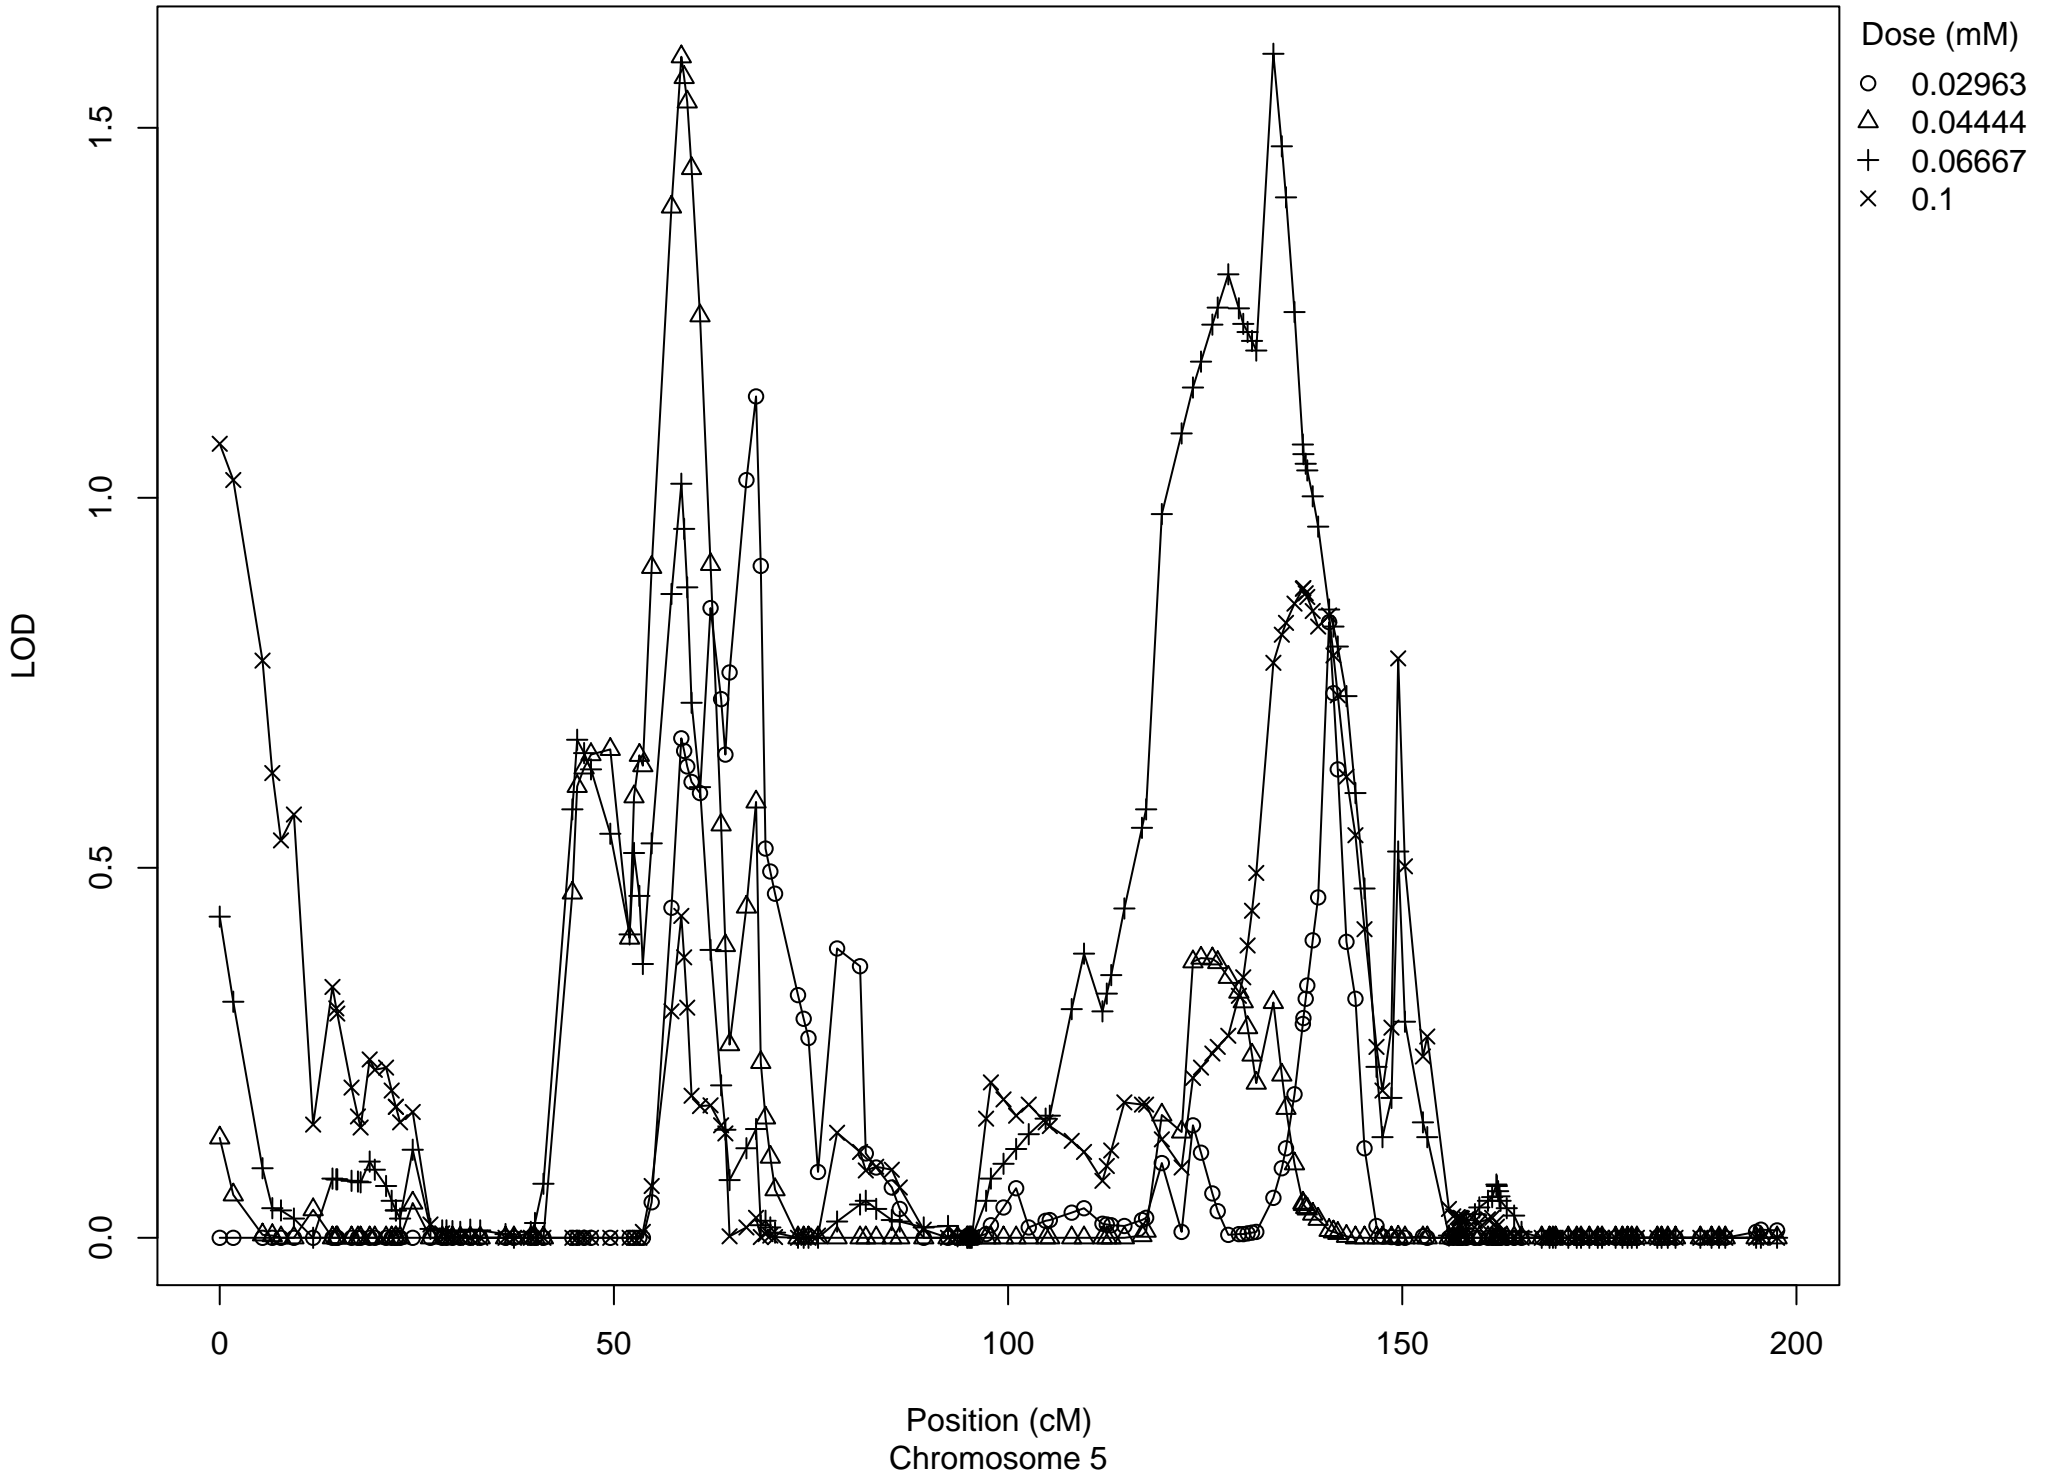

# Arsenic III Oxide (Arsen)

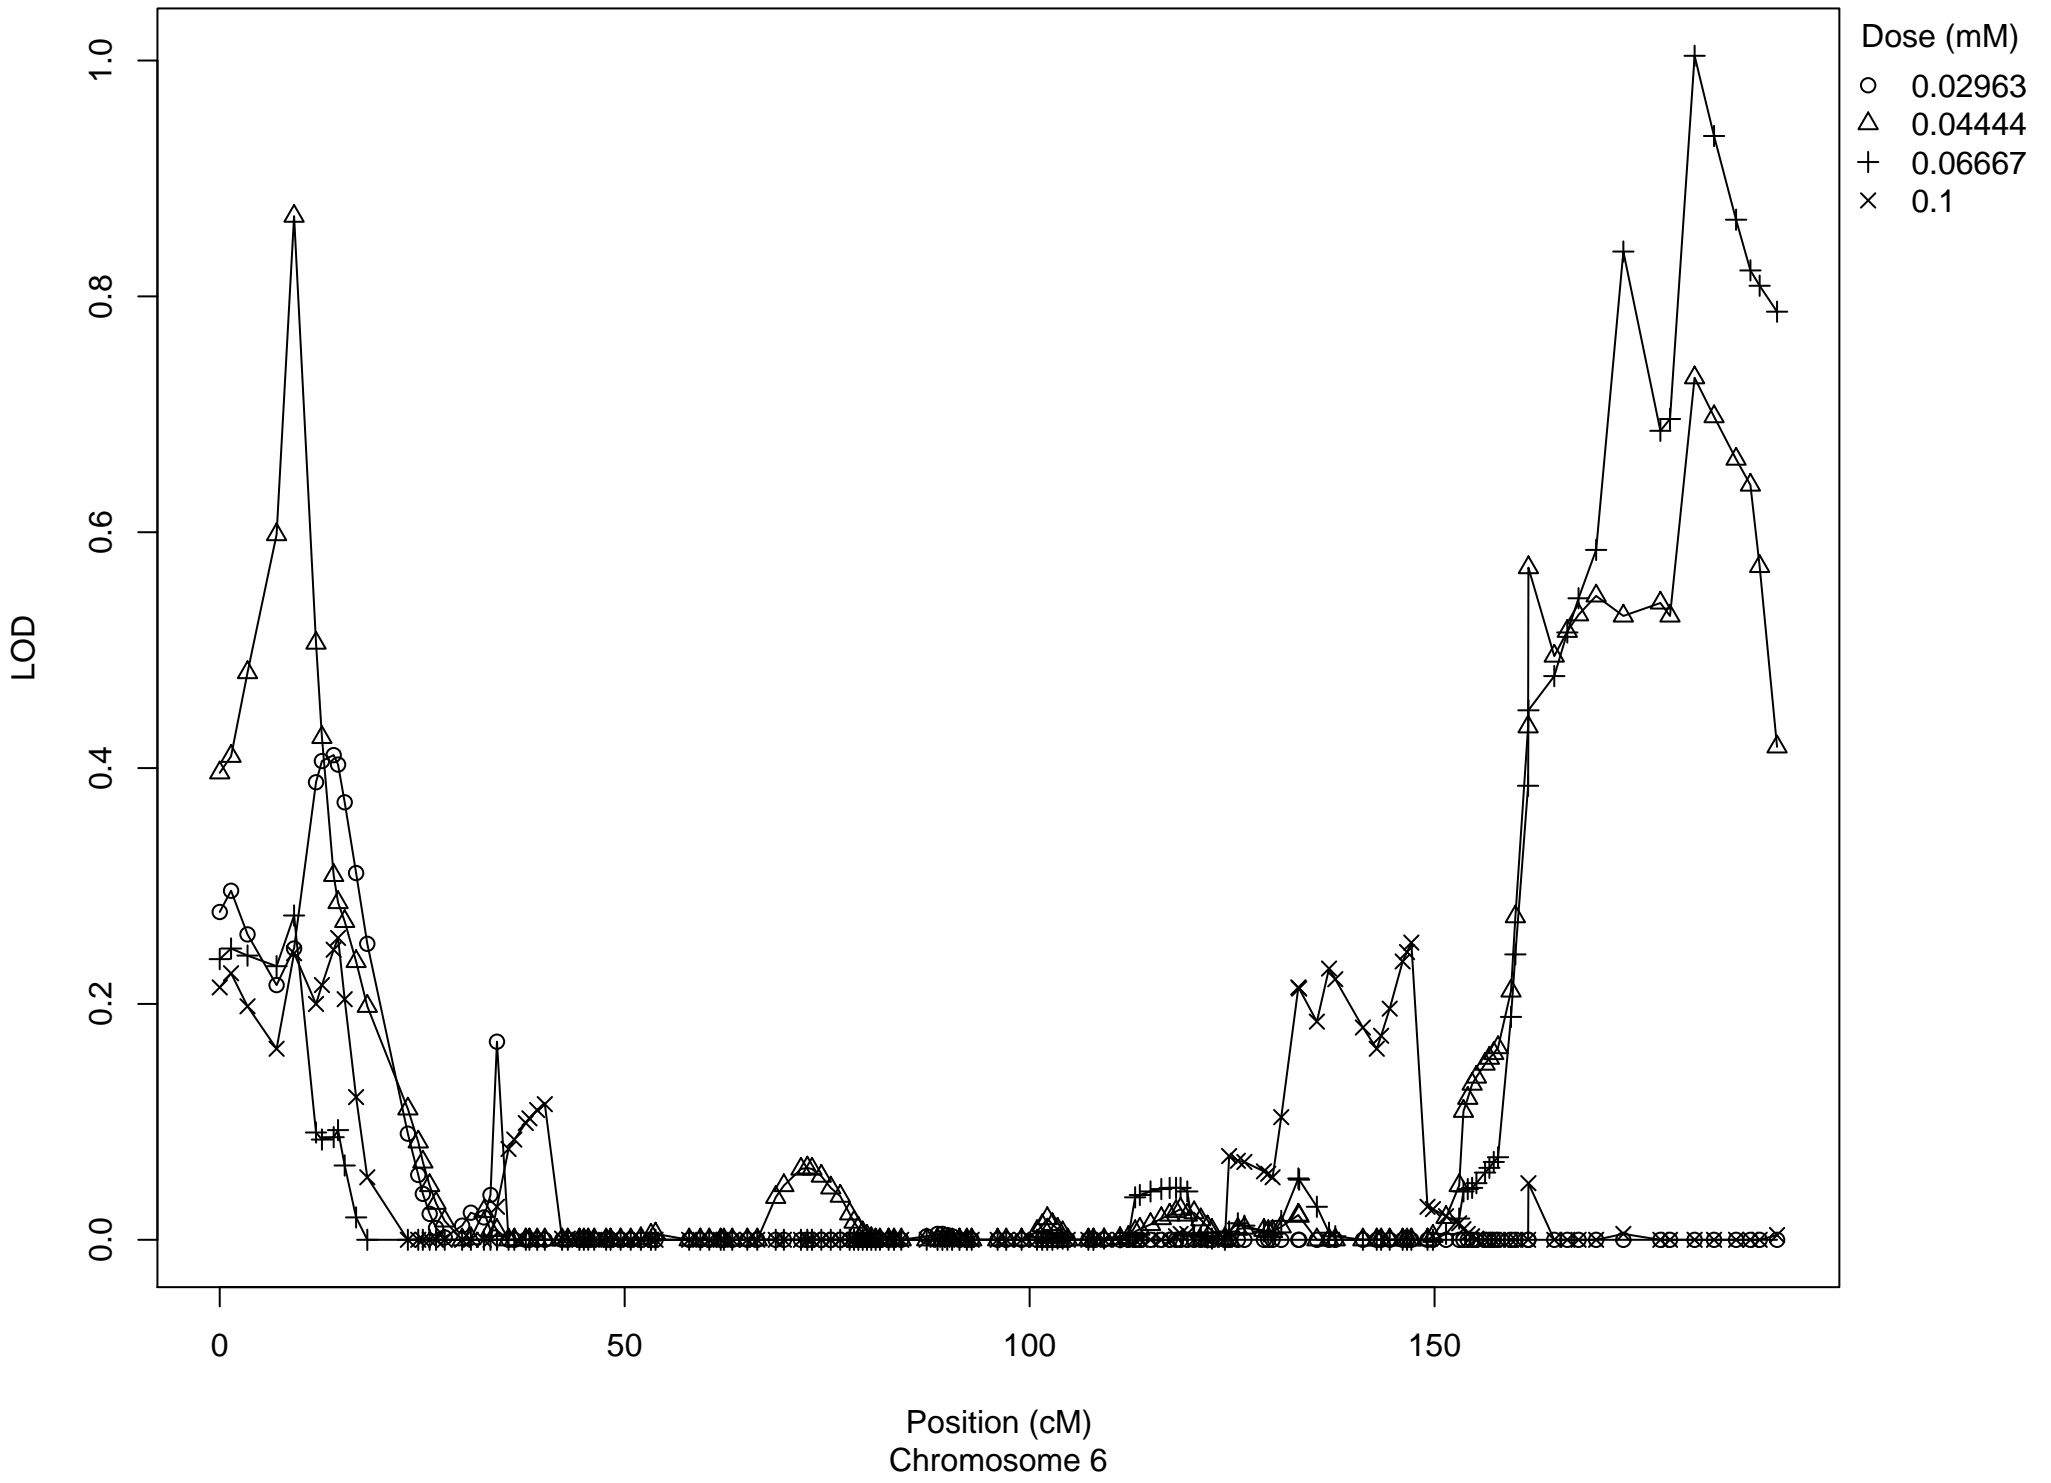

# Arsenic III Oxide (Arsen)

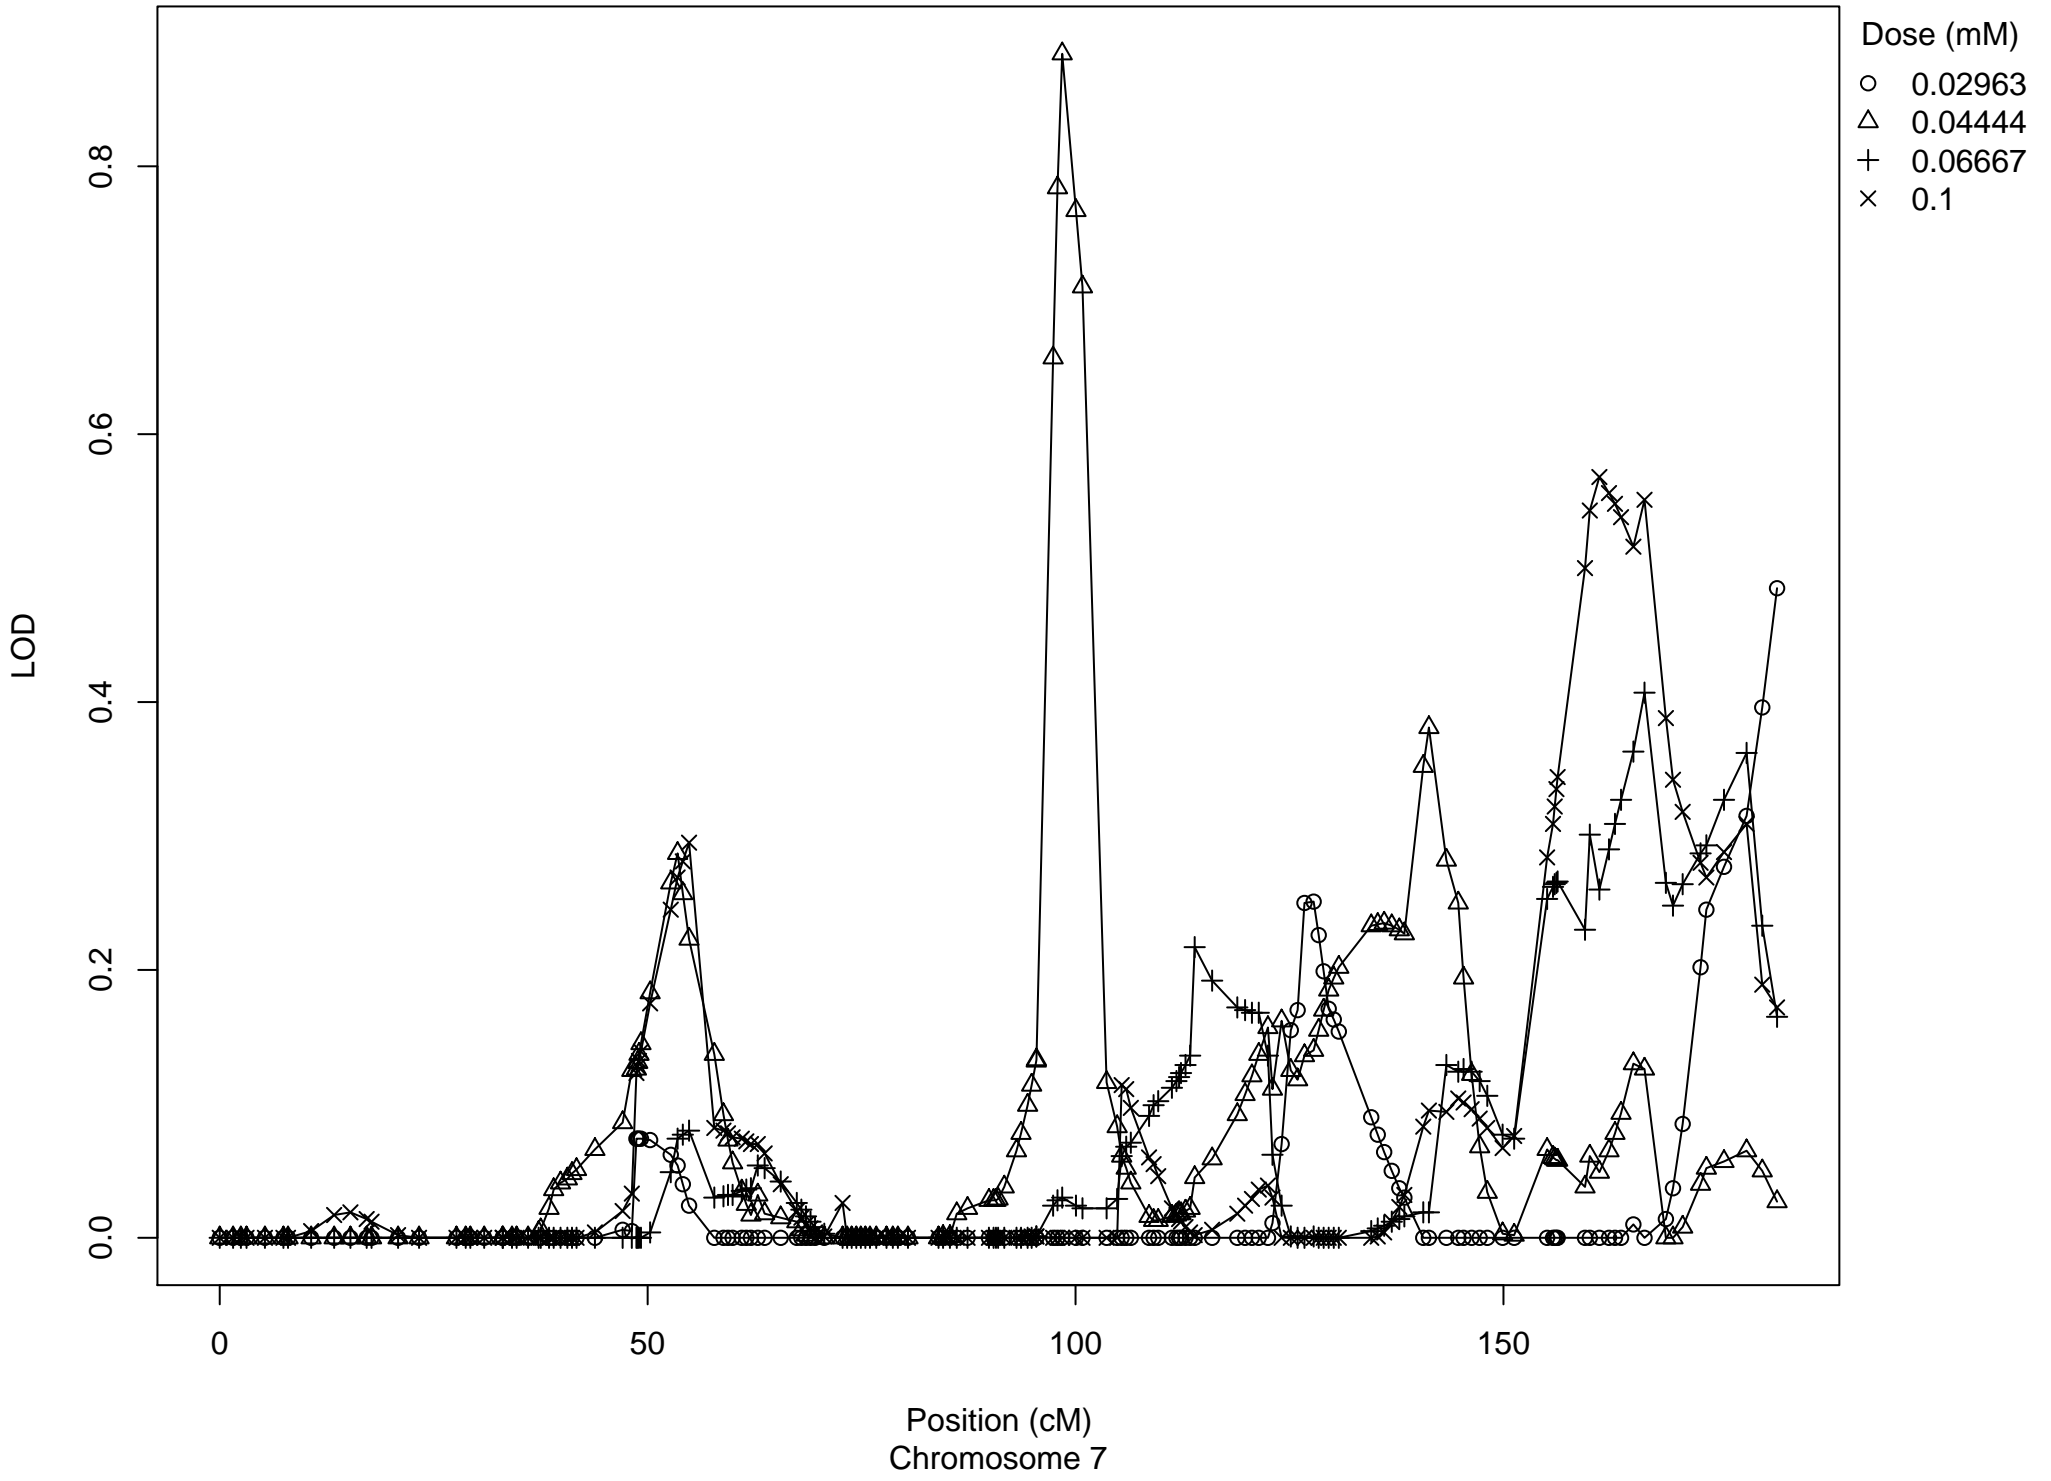

# Arsenic III Oxide (Arsen)

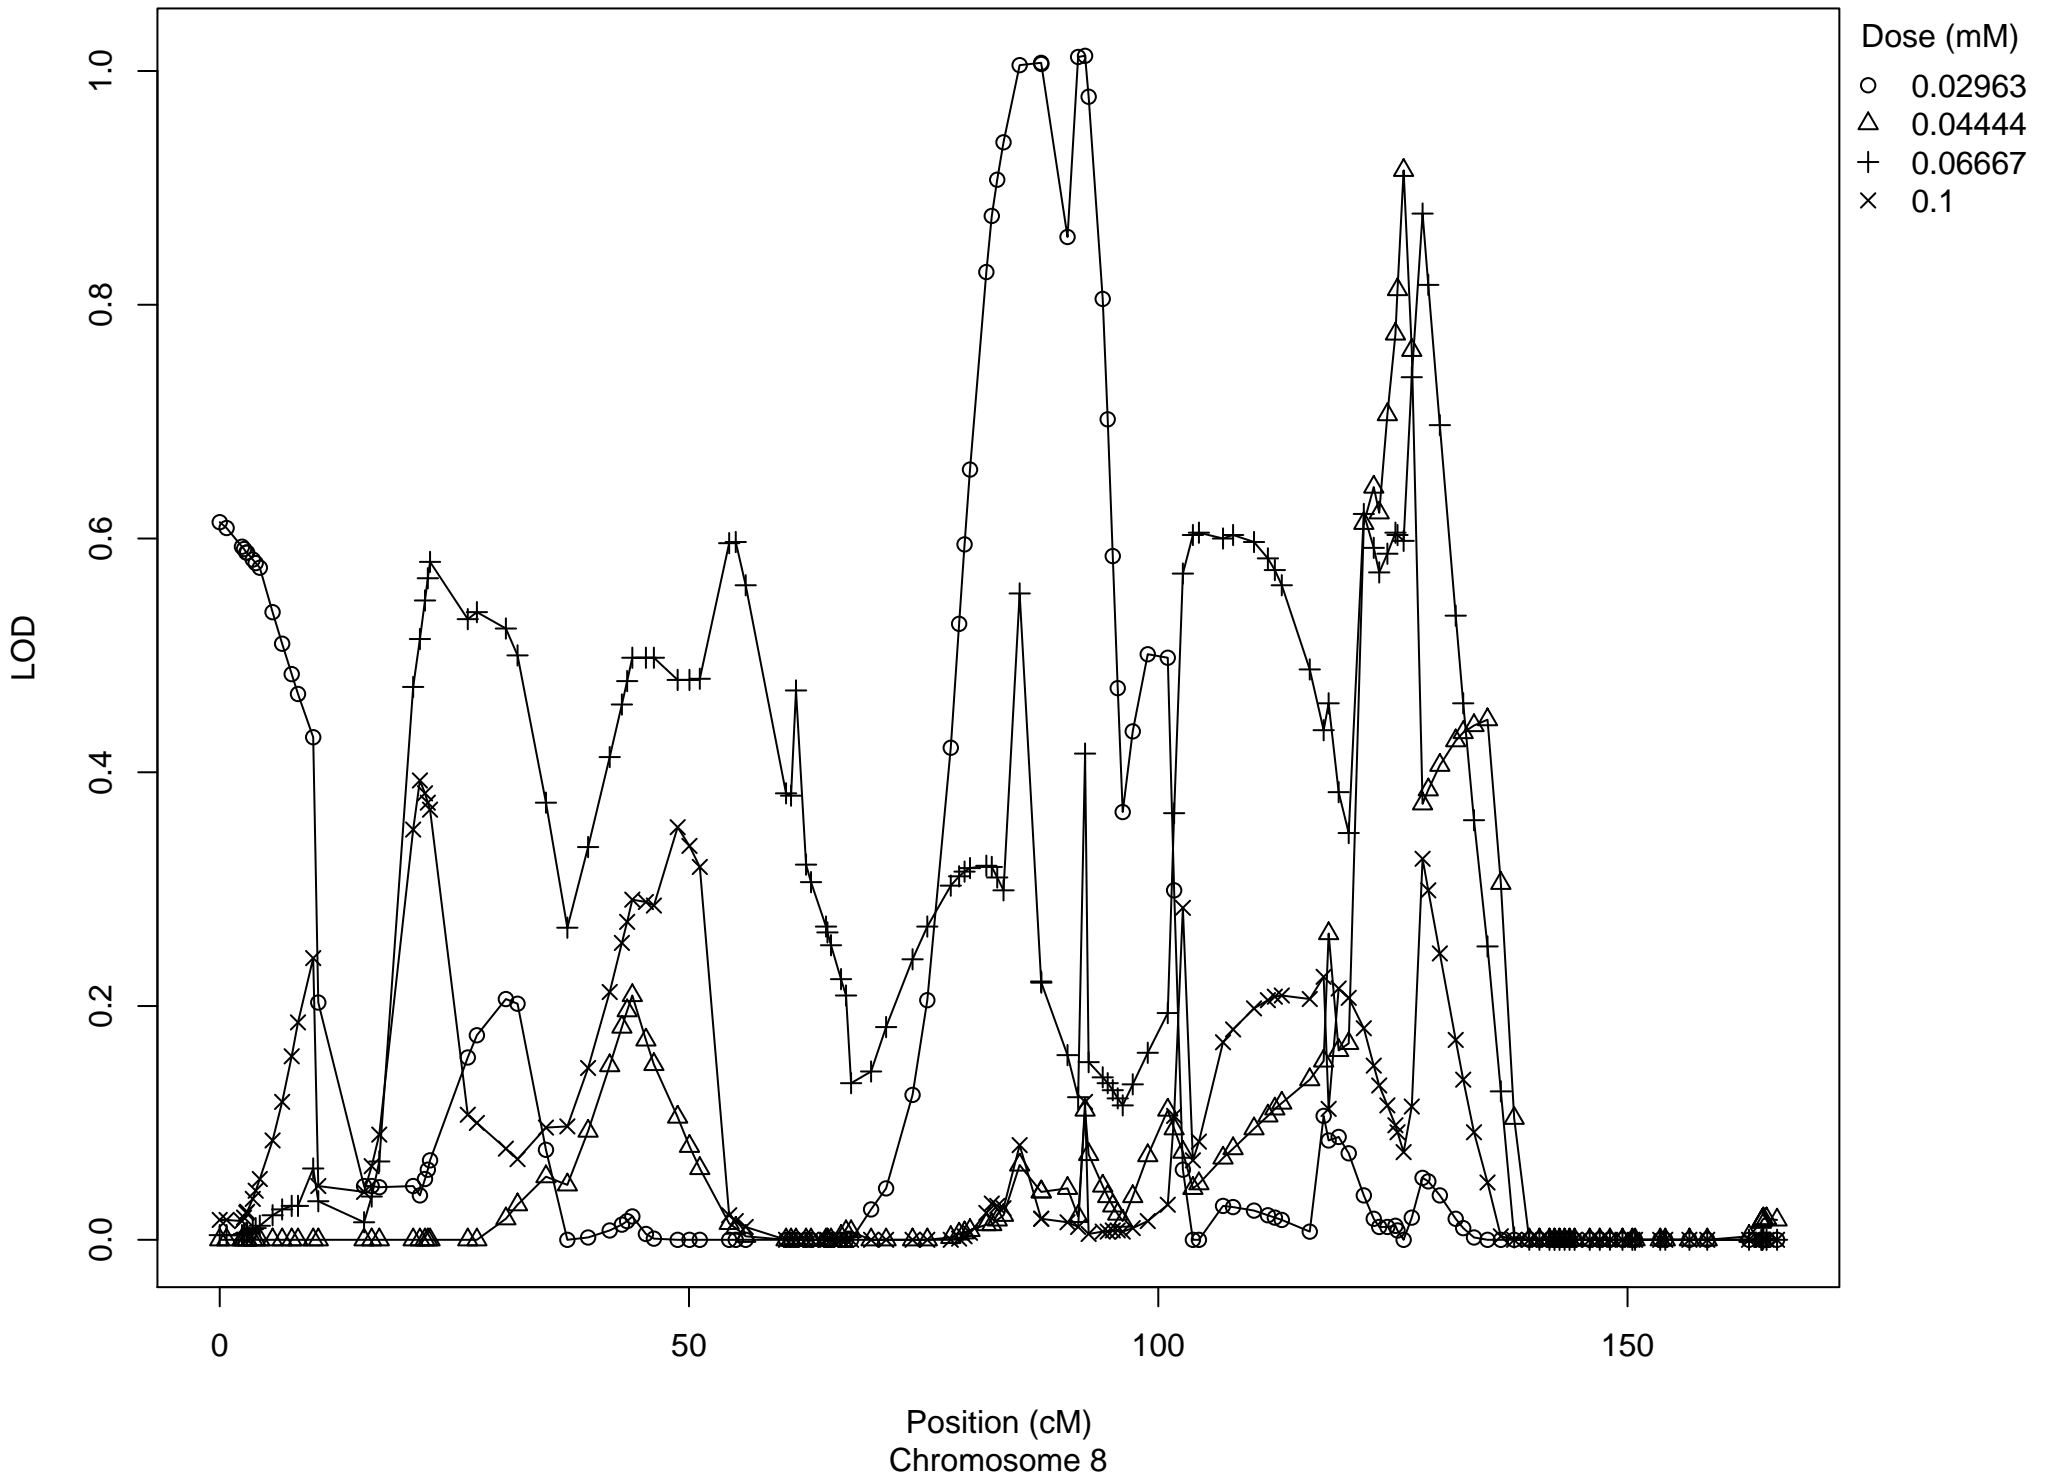

# Arsenic III Oxide (Arsen)

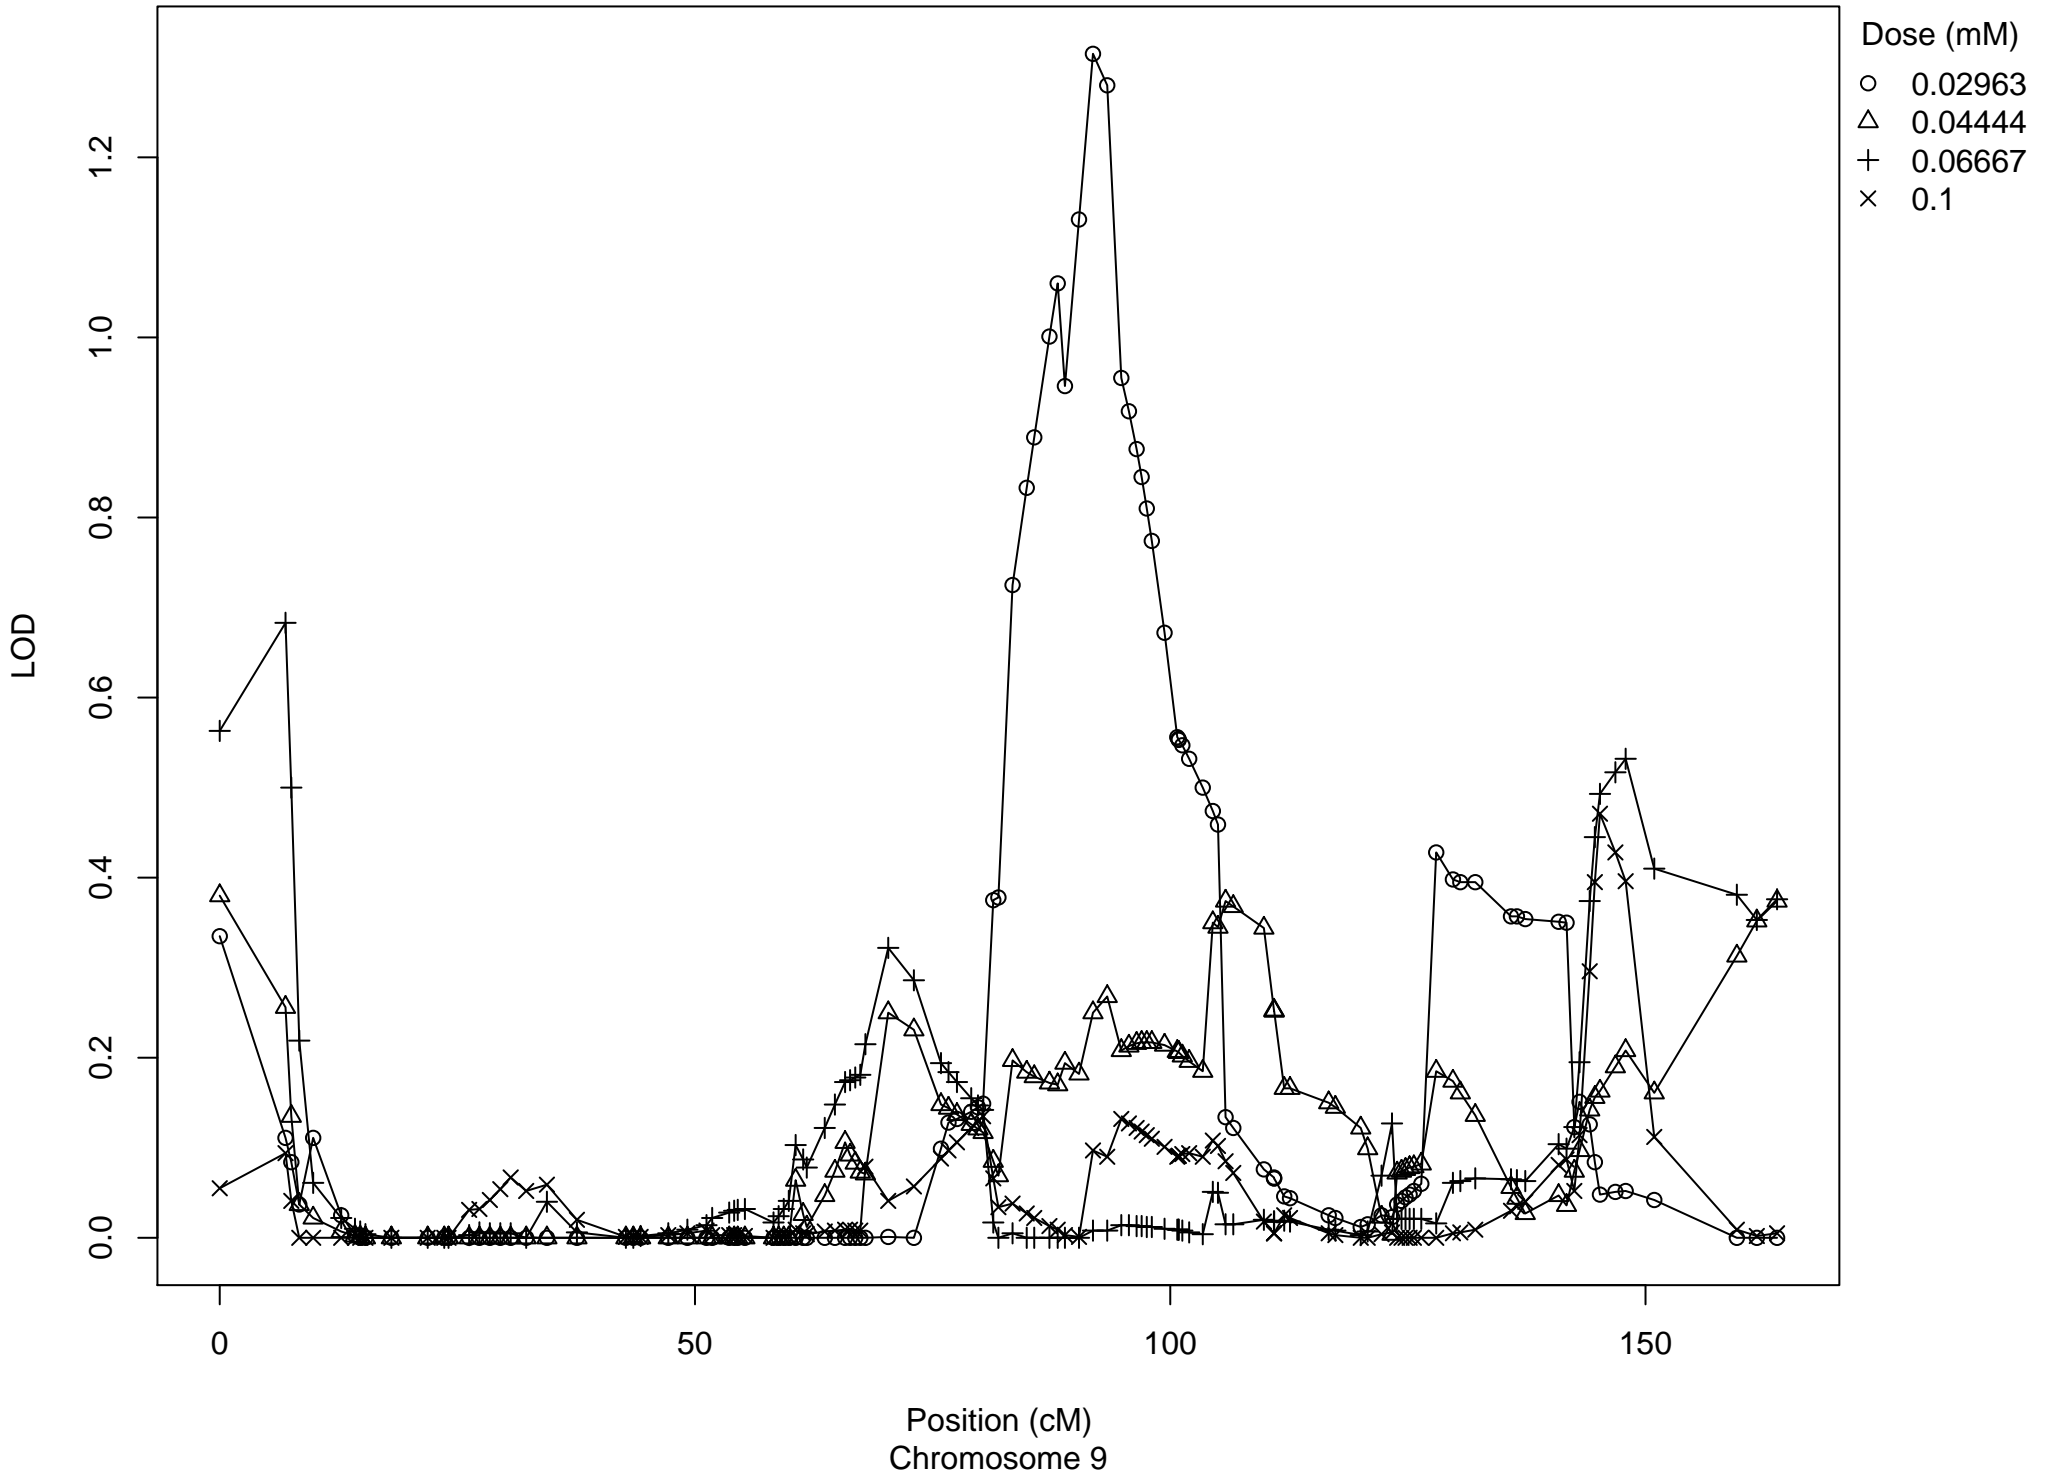

# Arsenic III Oxide (Arsen)

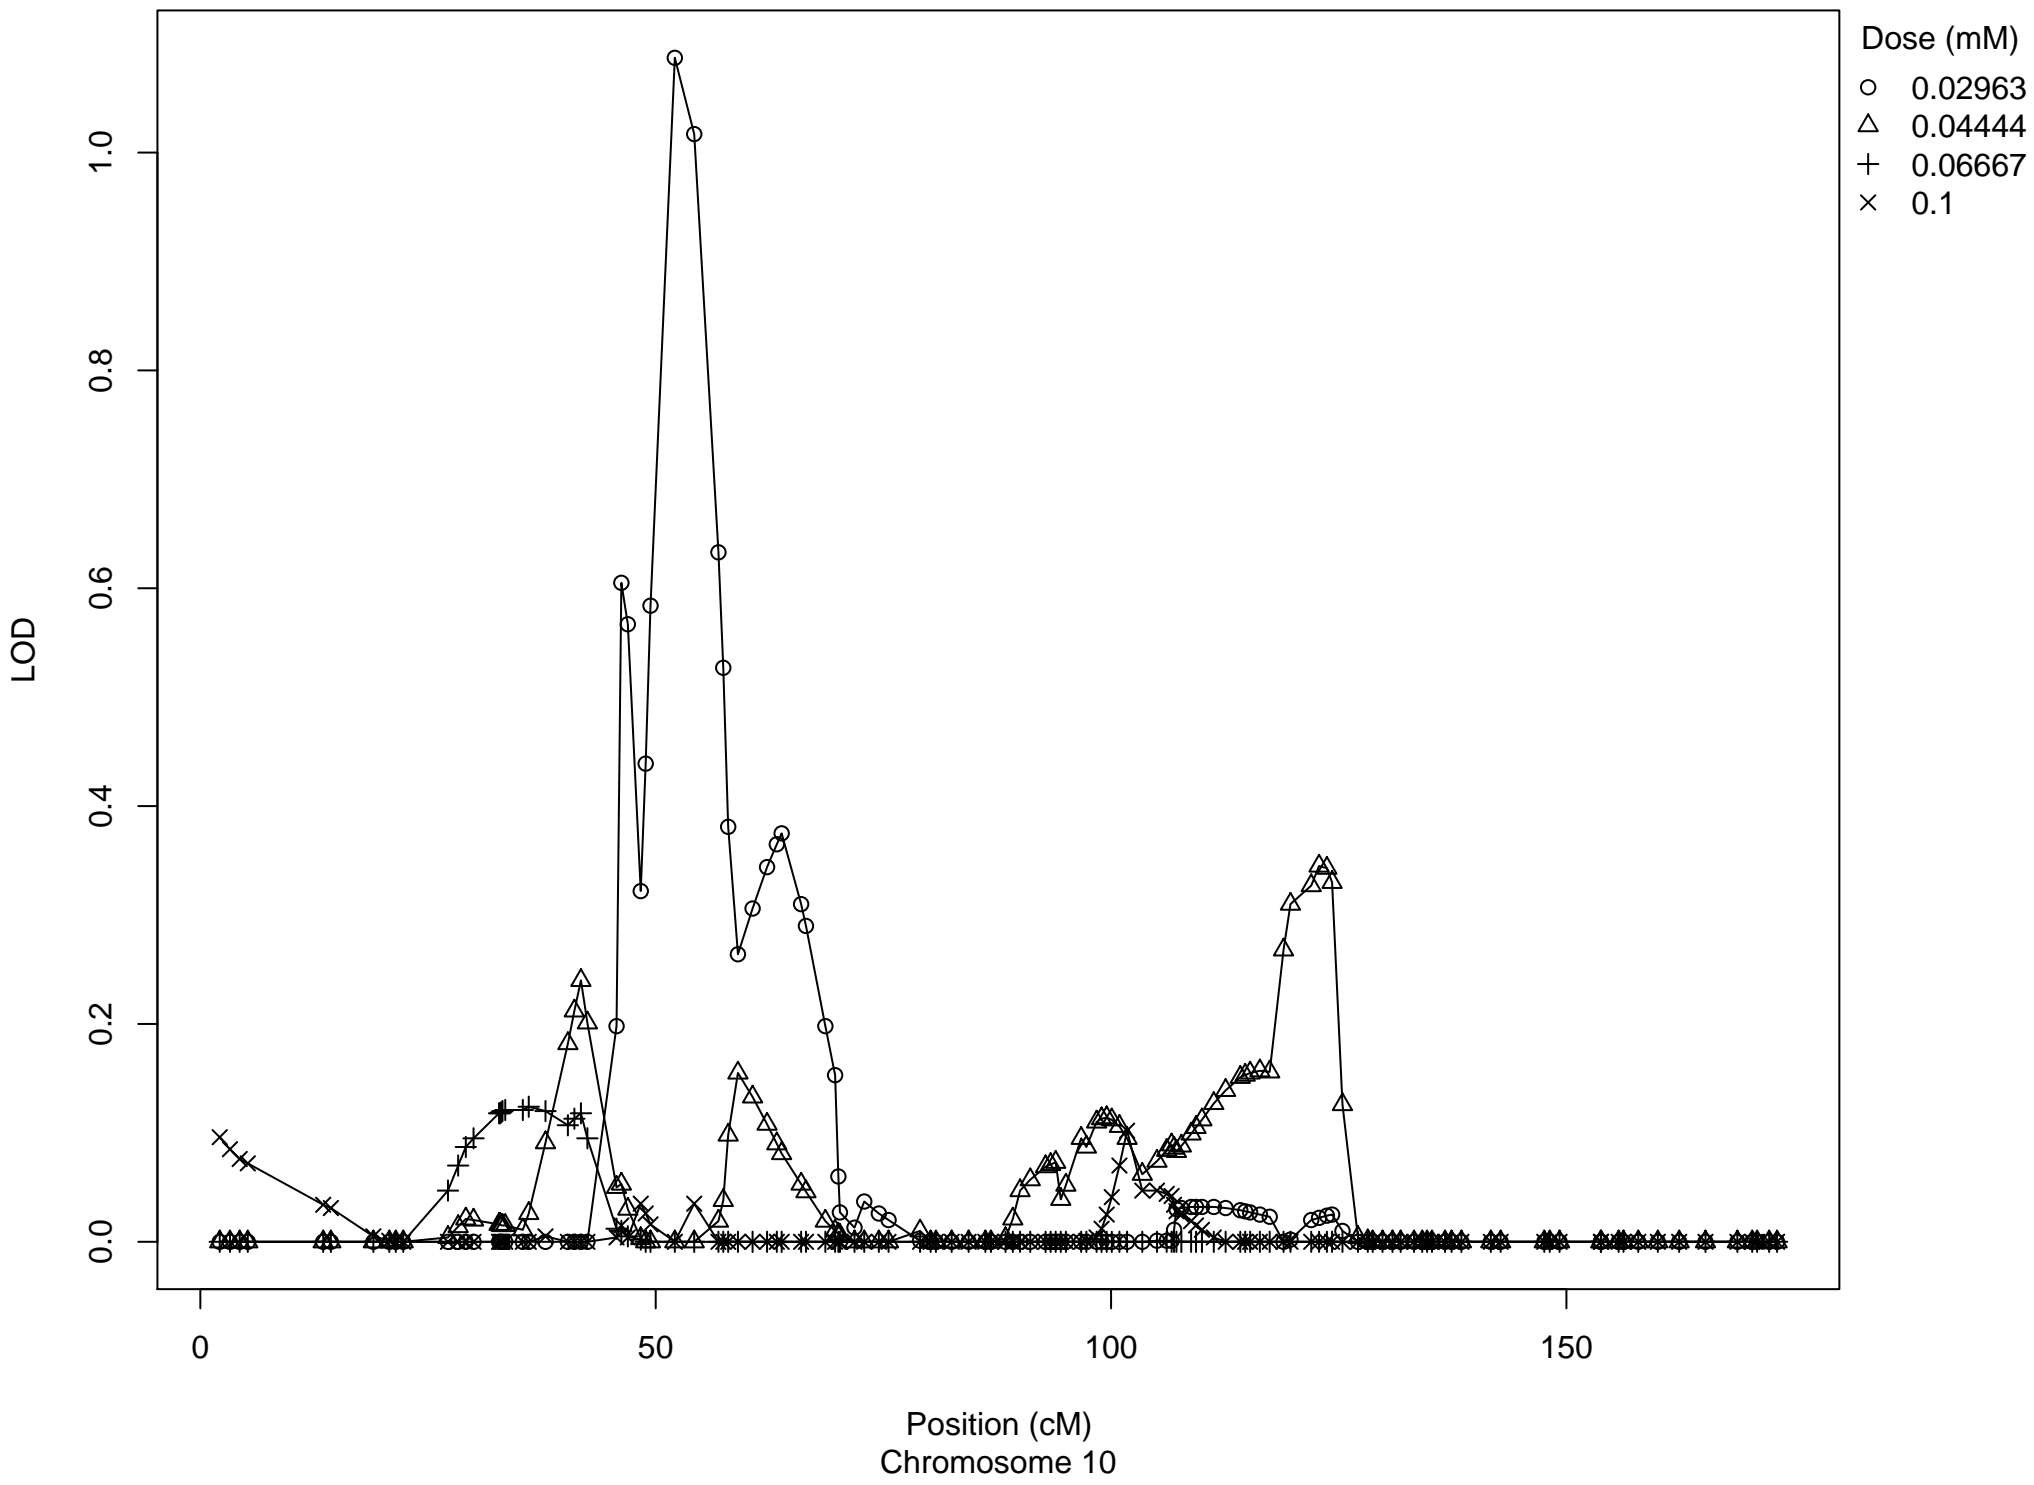



# Arsenic III Oxide (Arsen)

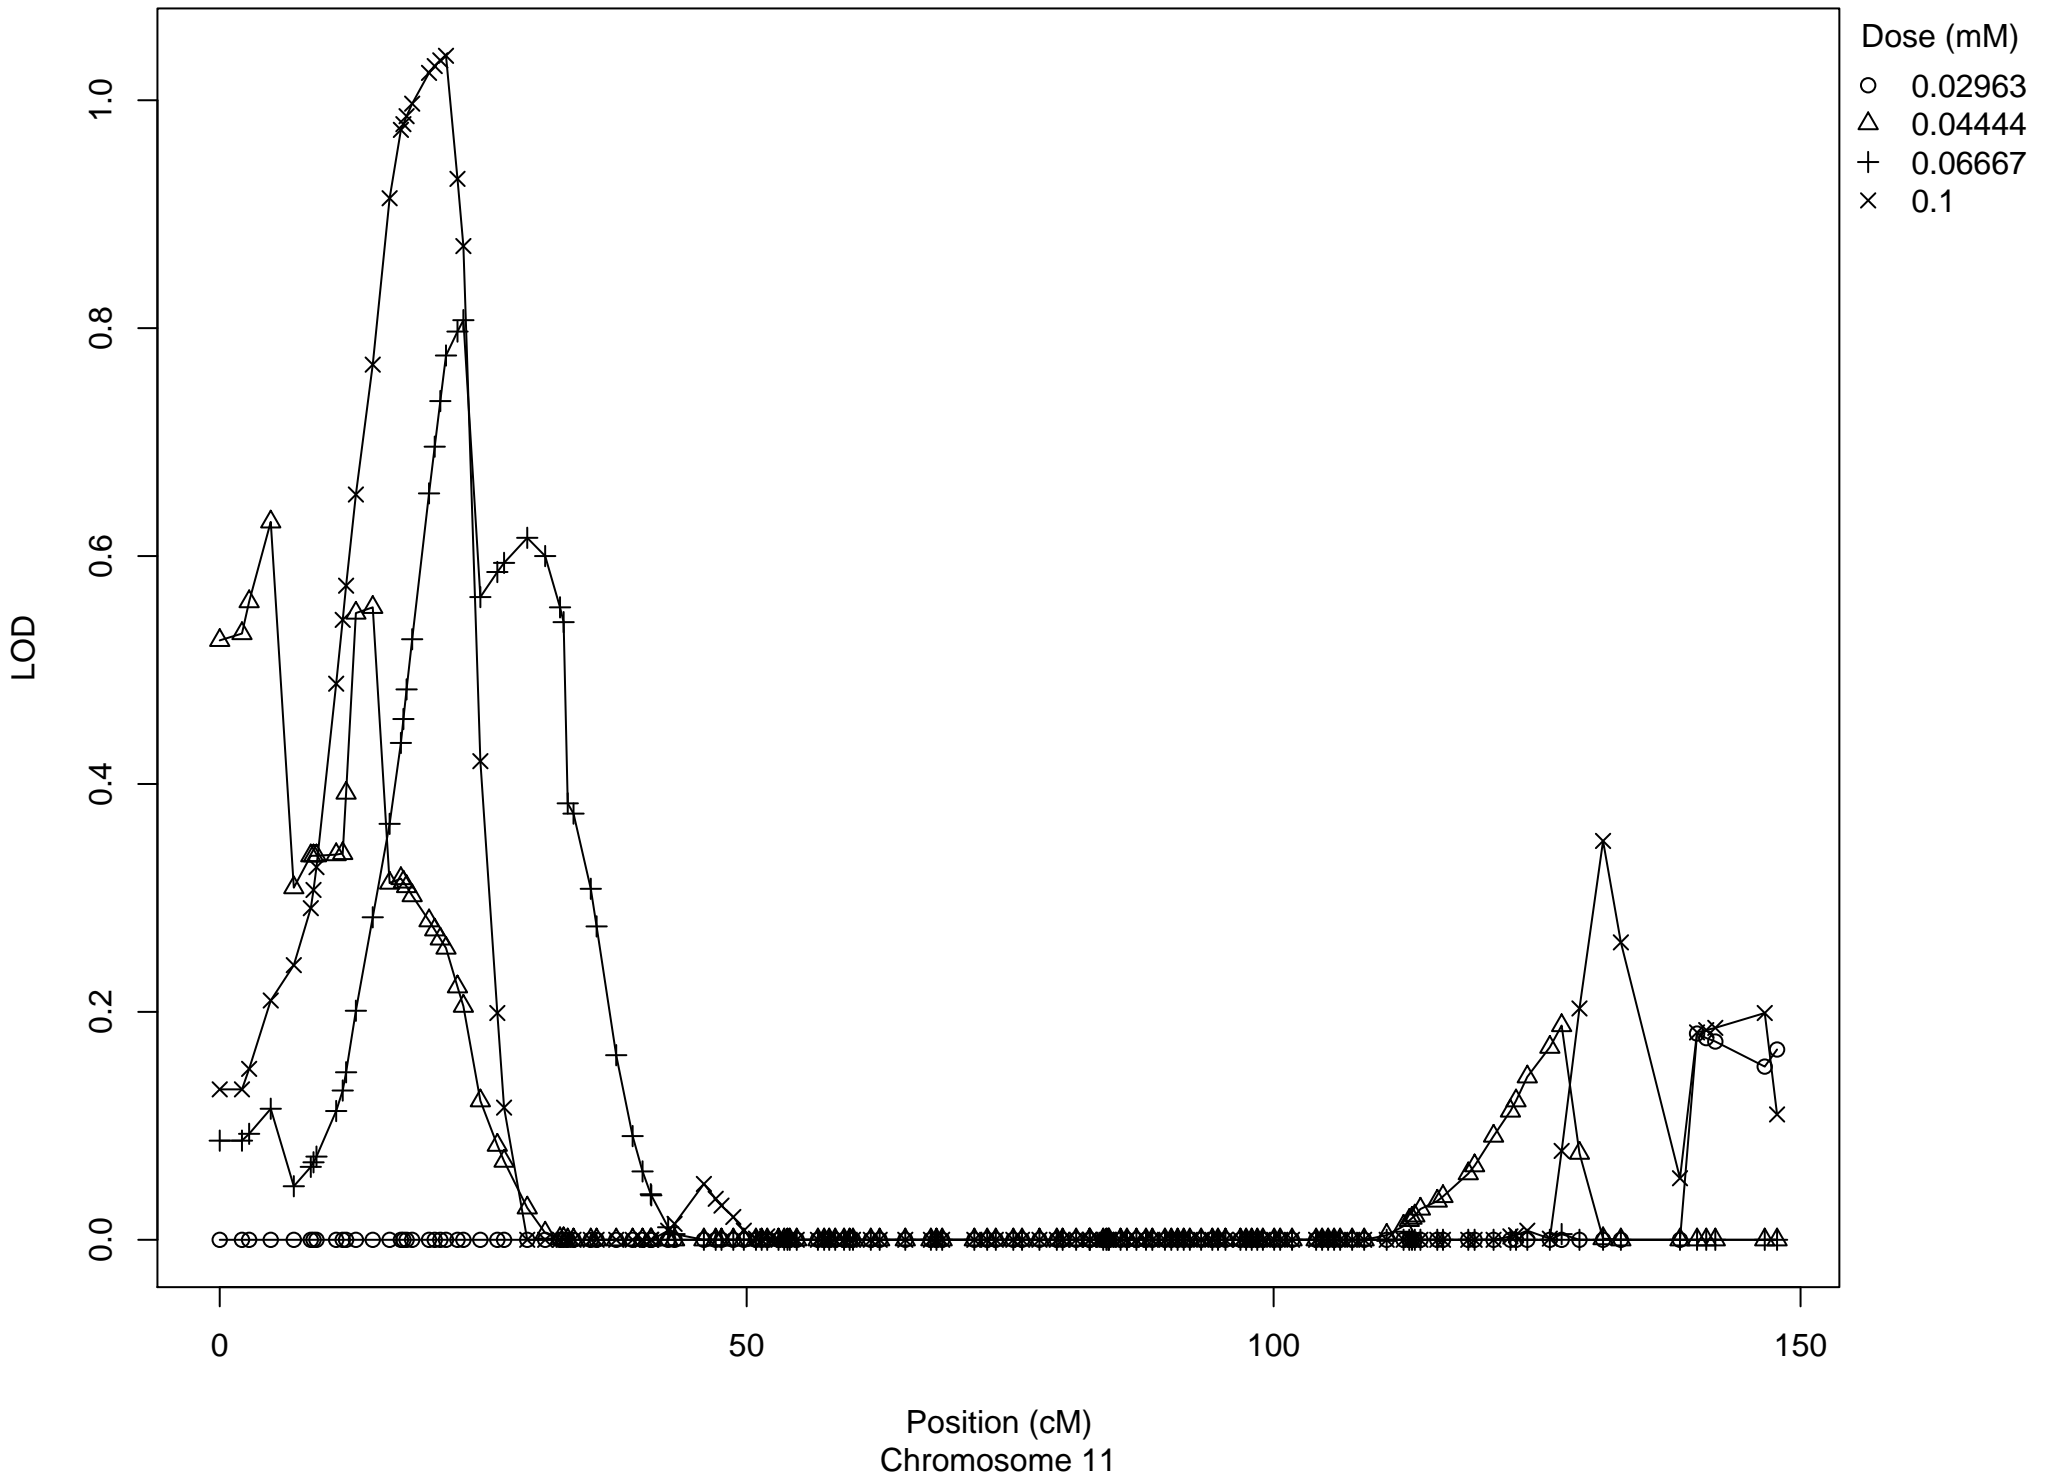

# Arsenic III Oxide (Arsen)

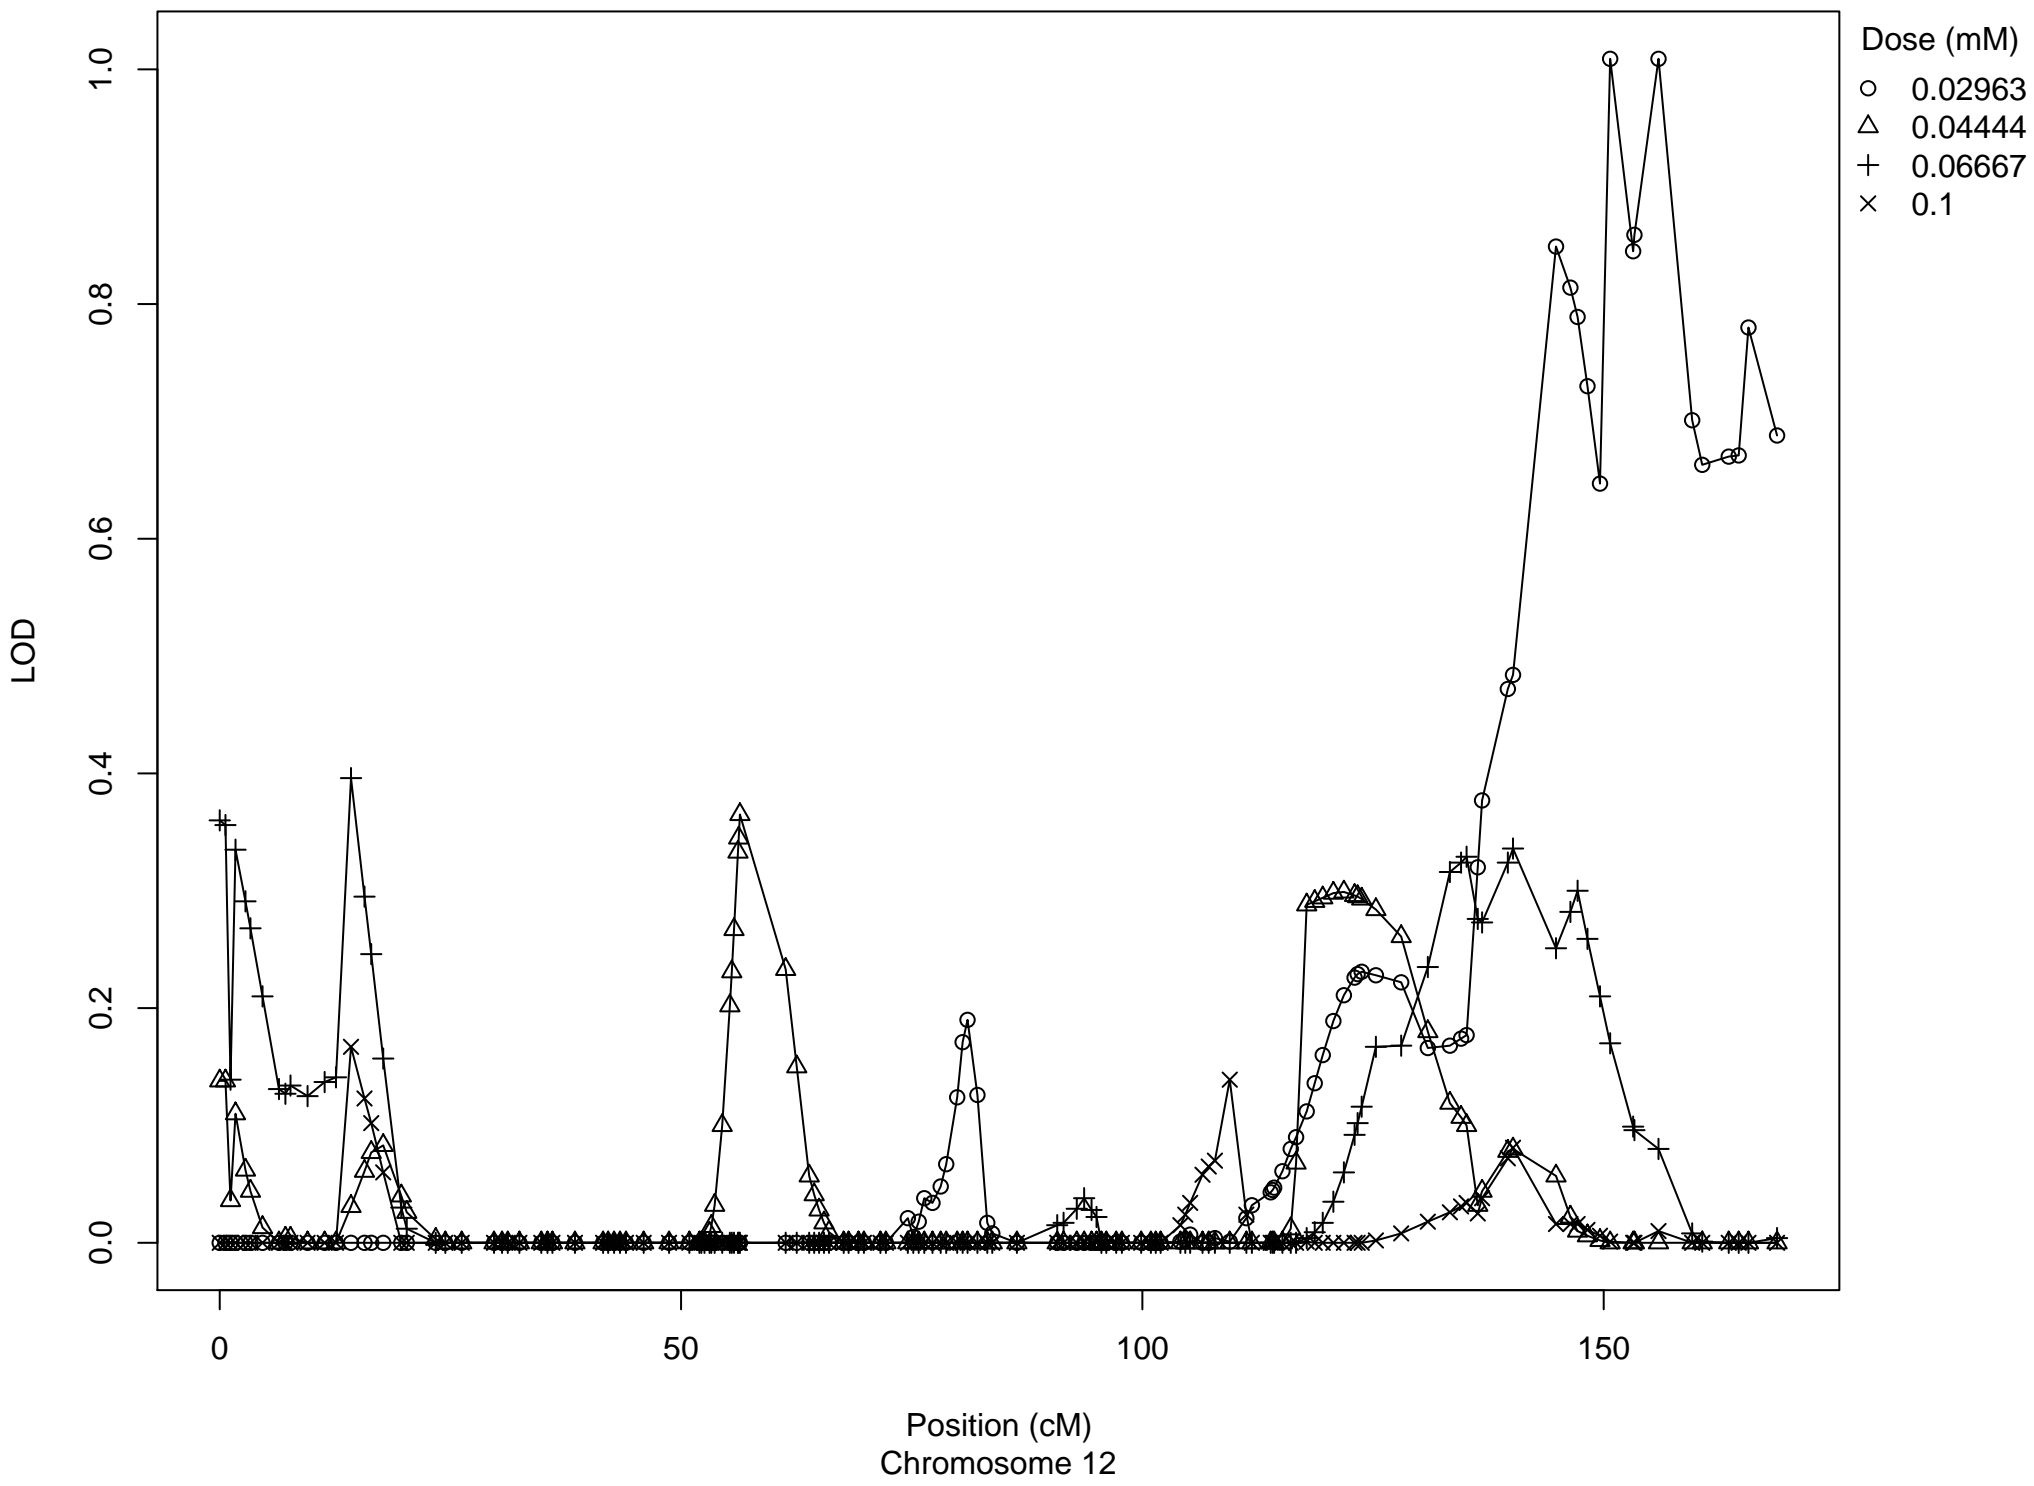

# Arsenic III Oxide (Arsen)

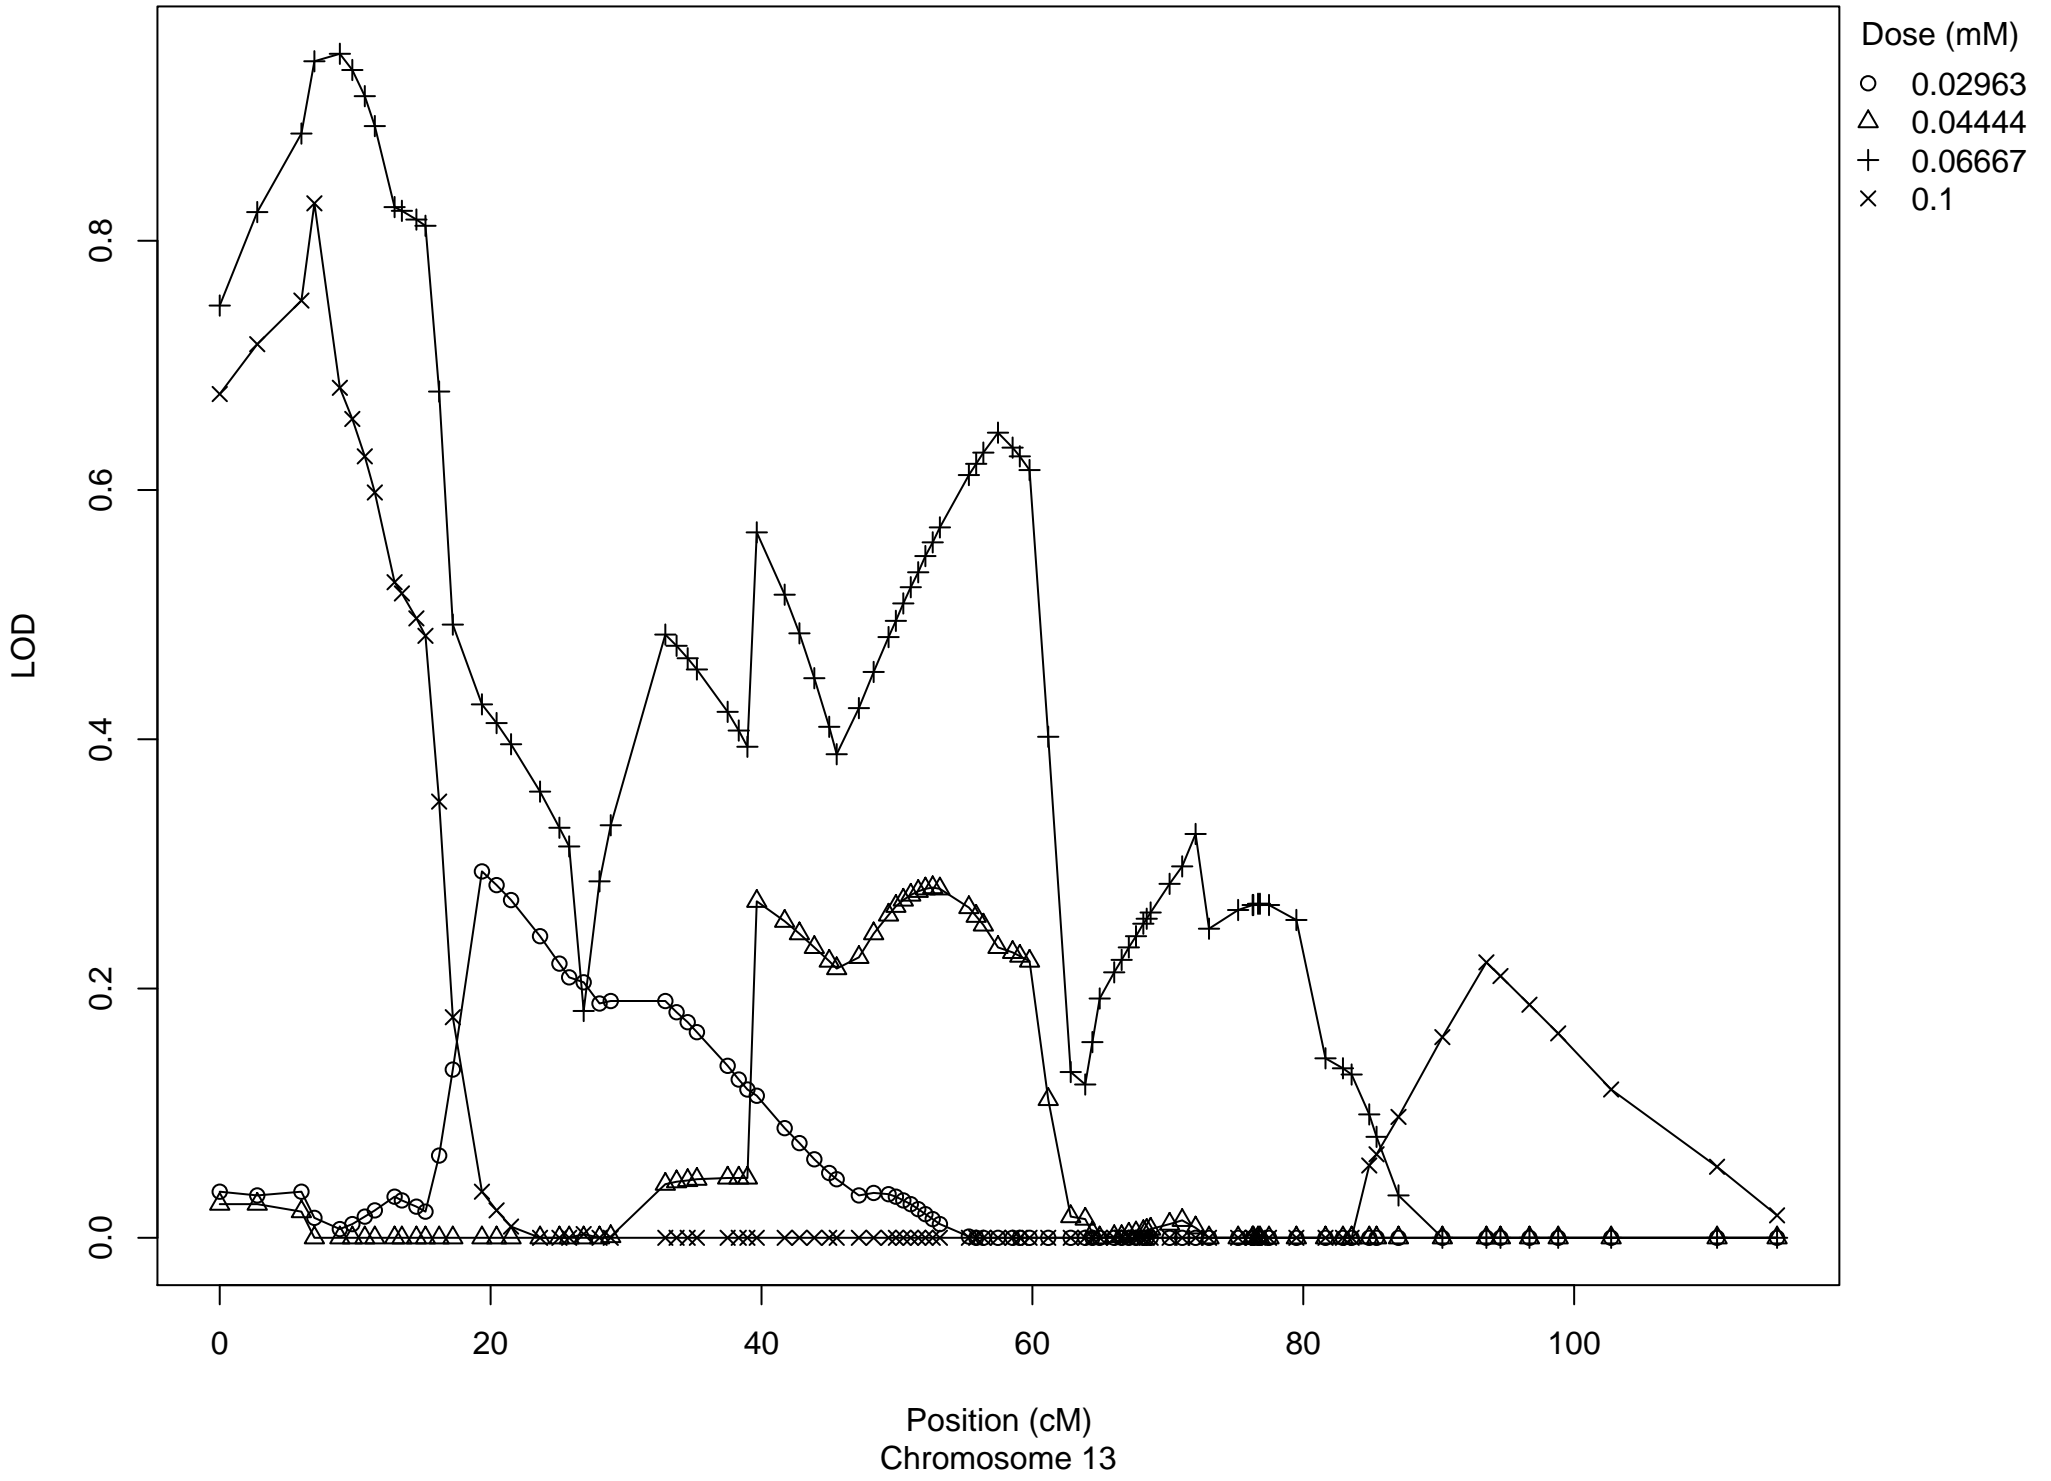

# Arsenic III Oxide (Arsen)

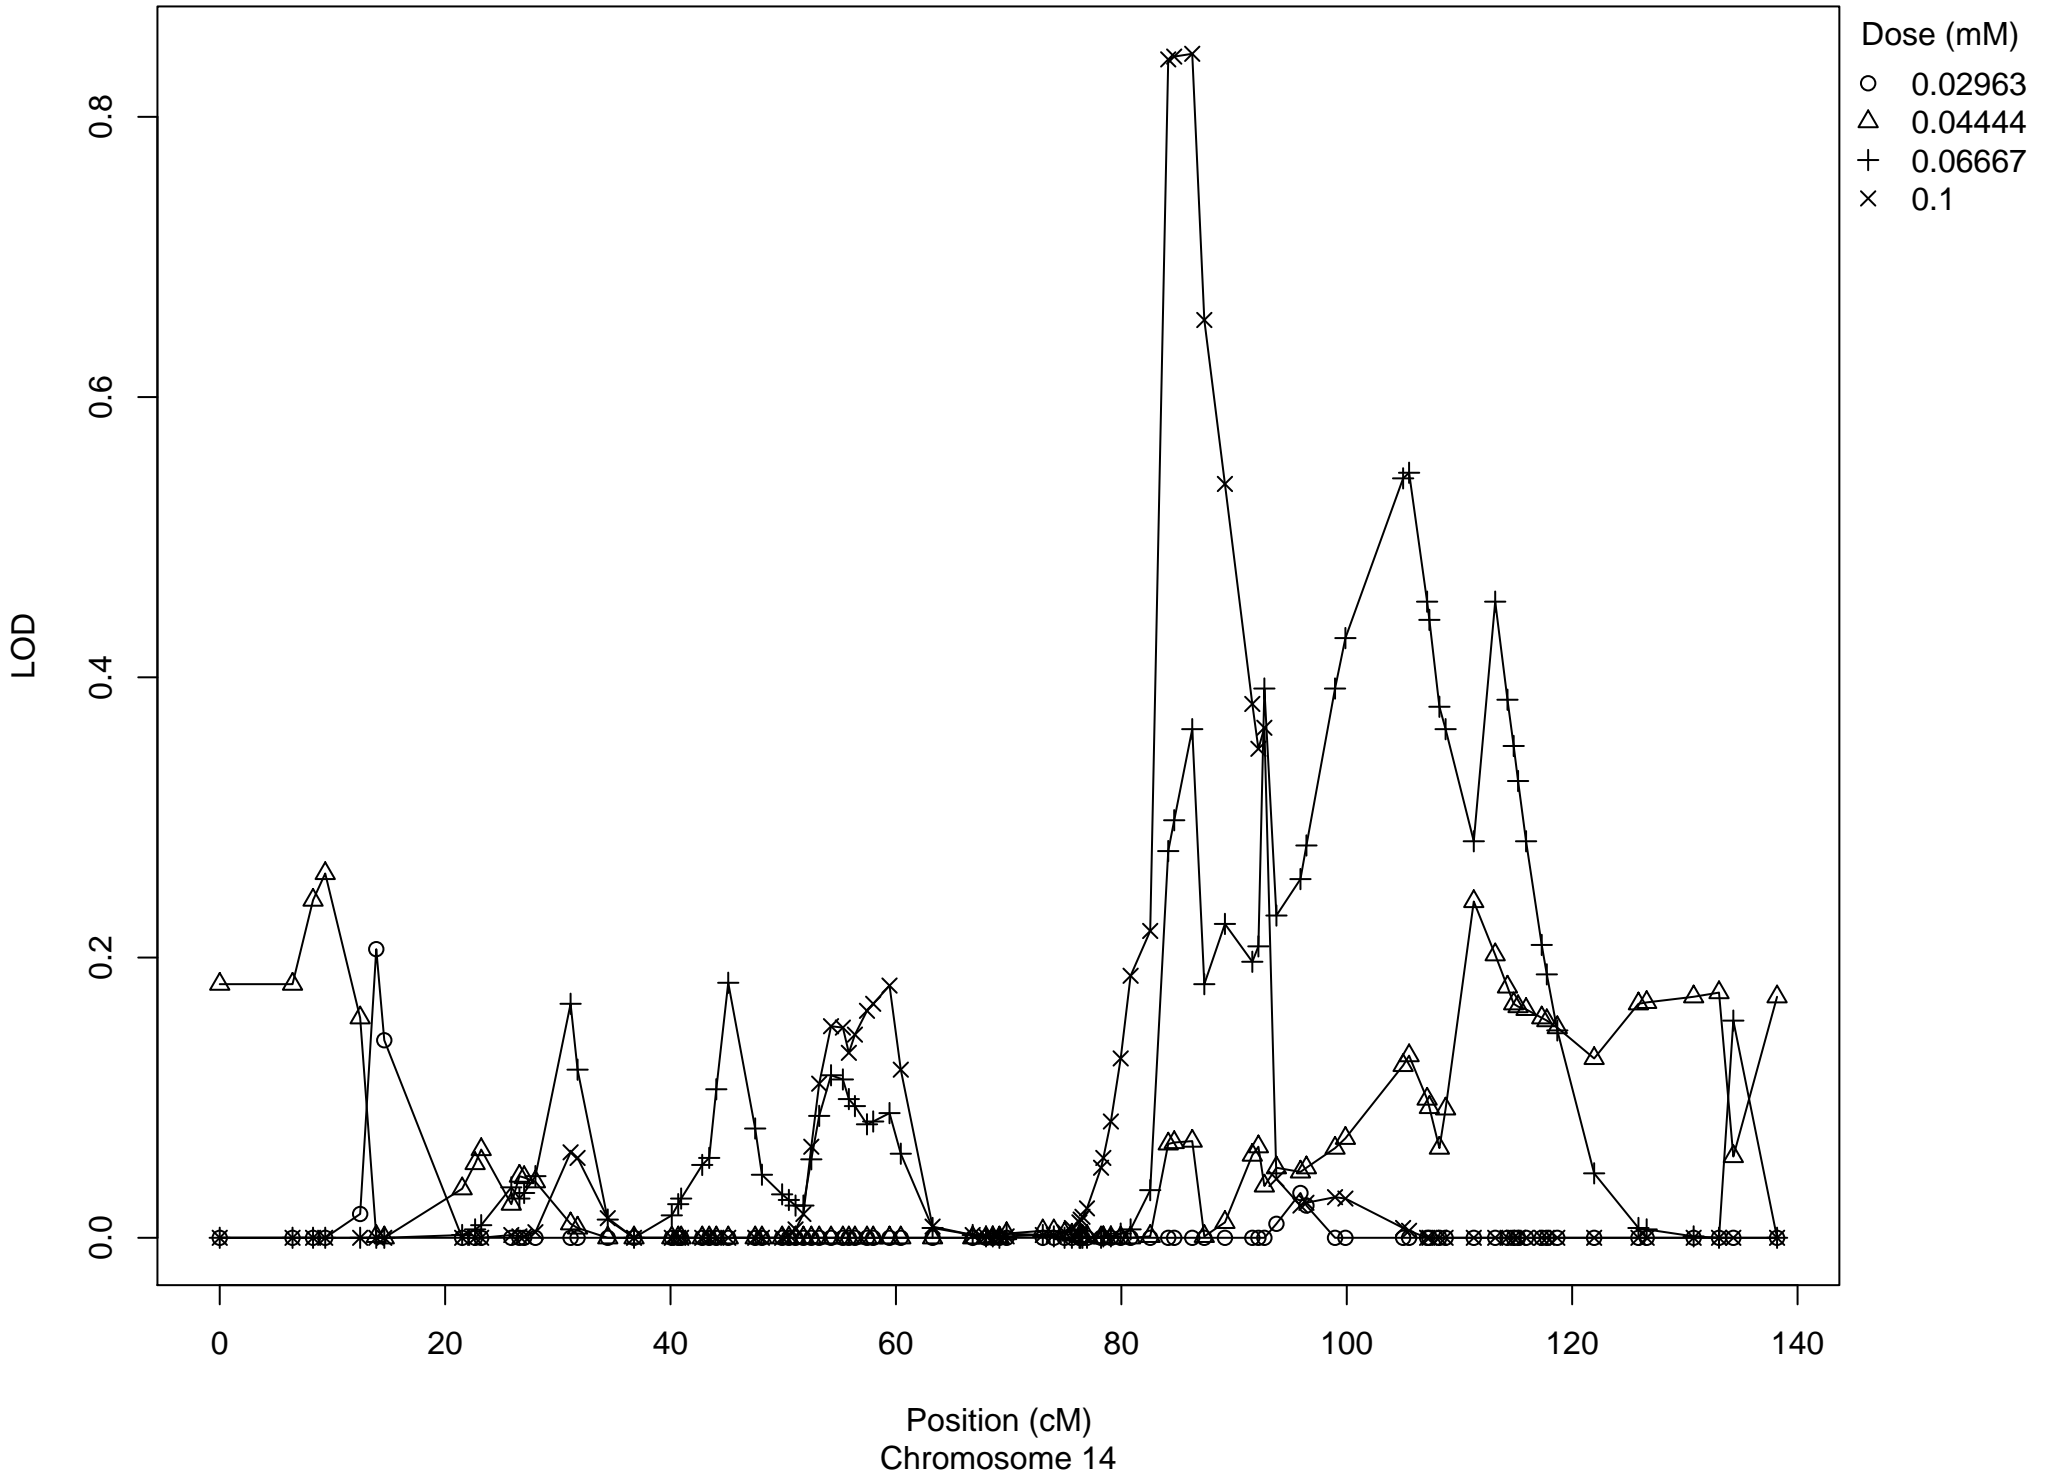

# Arsenic III Oxide (Arsen)

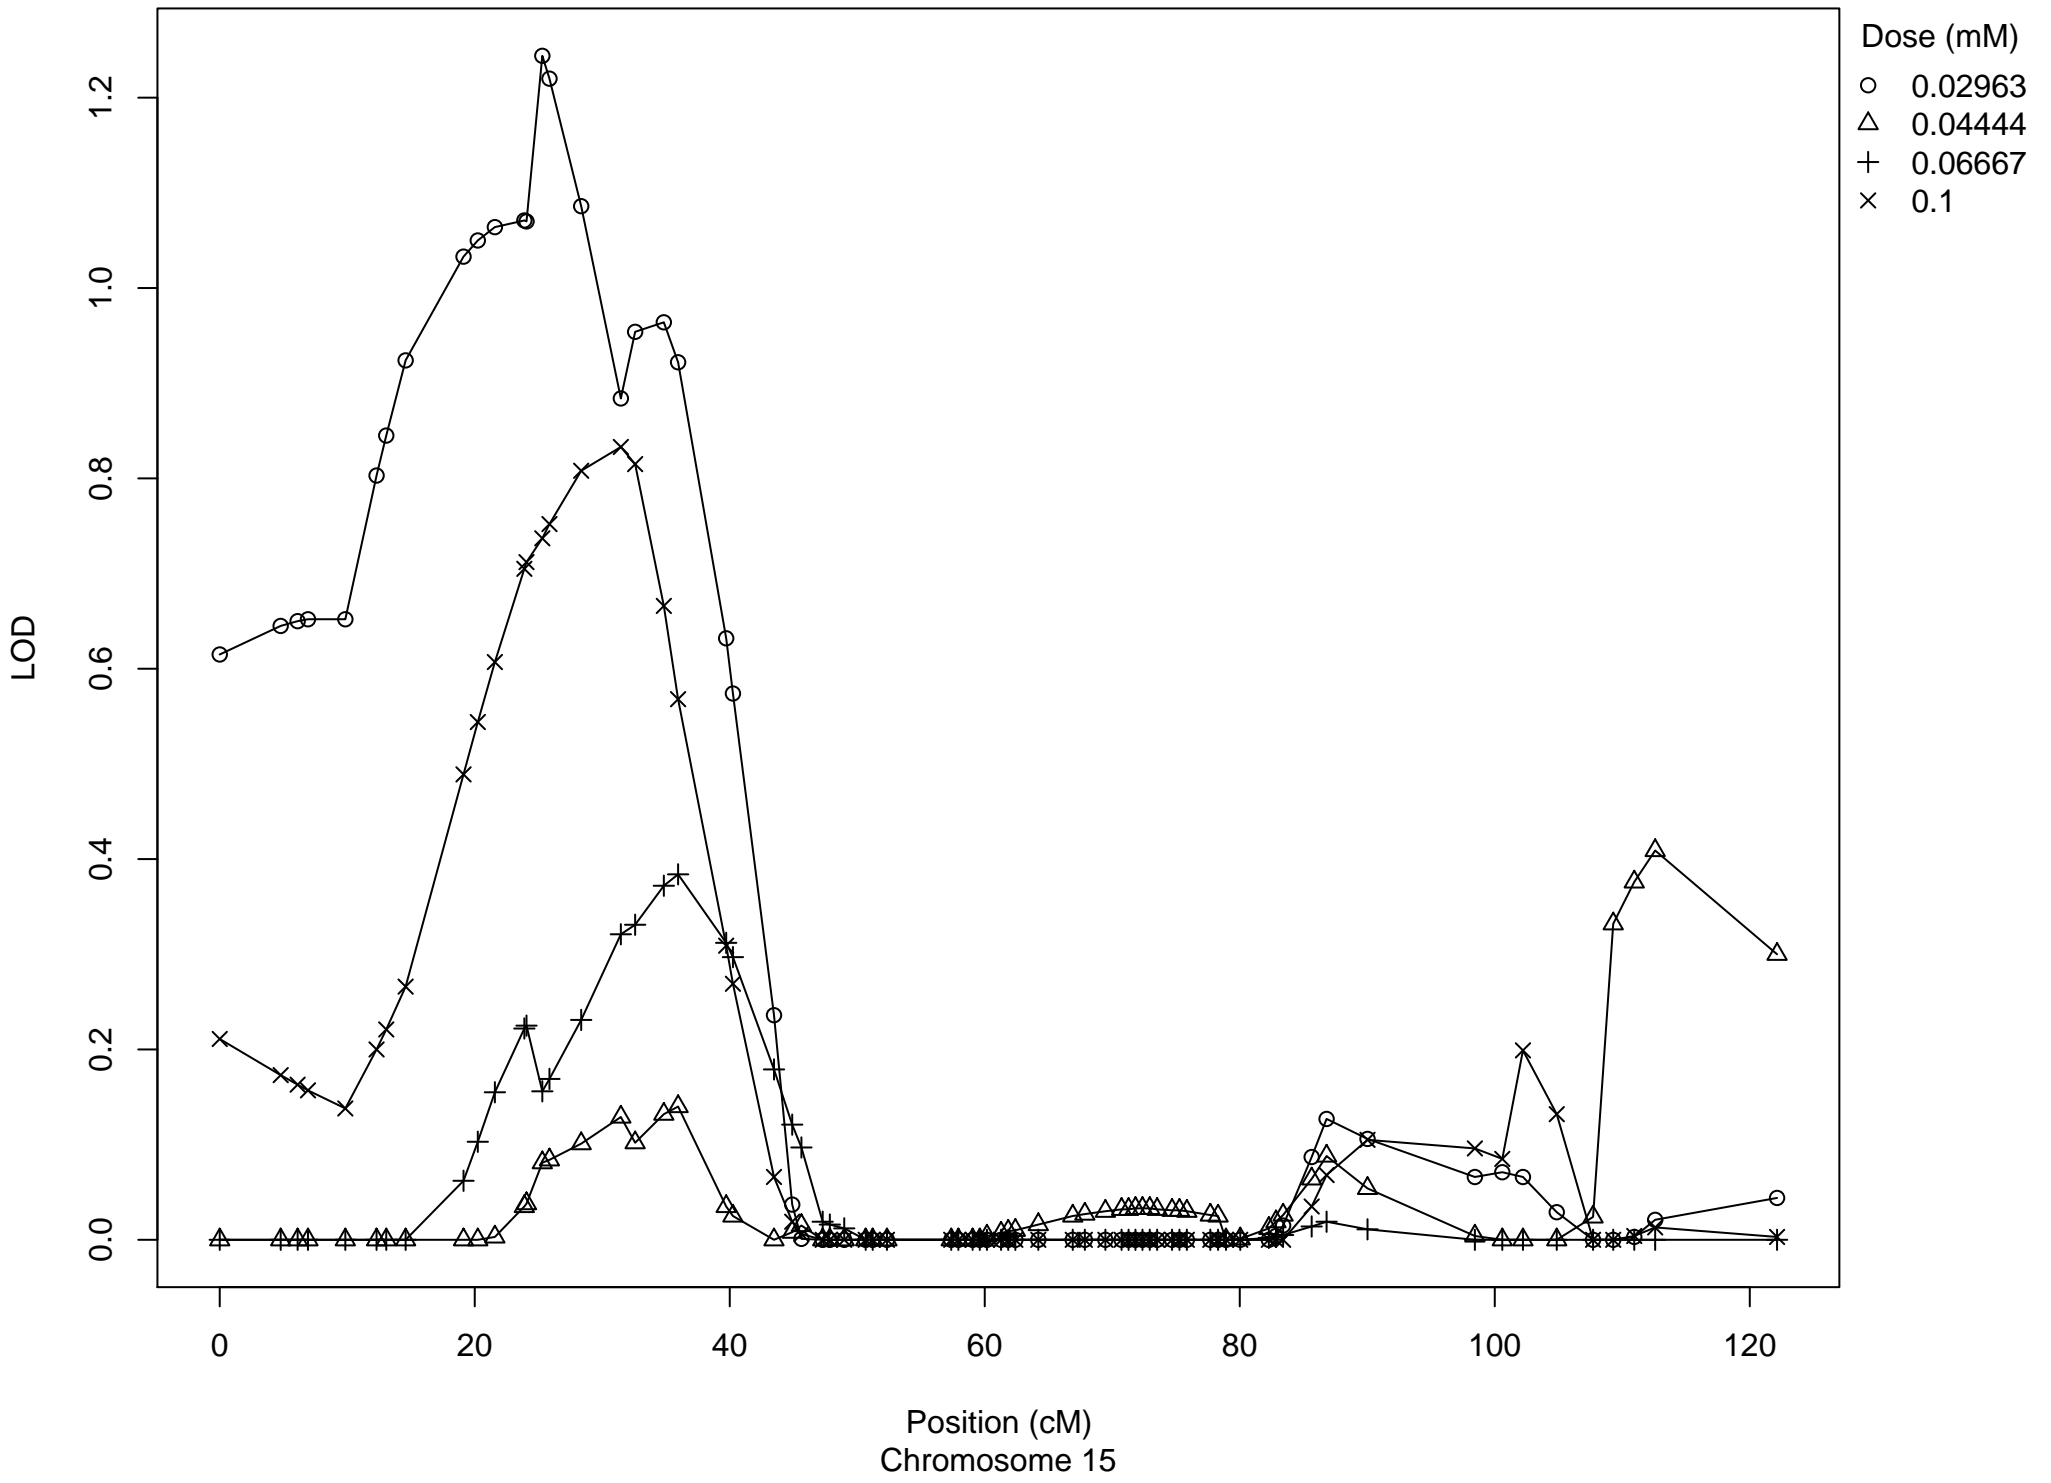

# Arsenic III Oxide (Arsen)

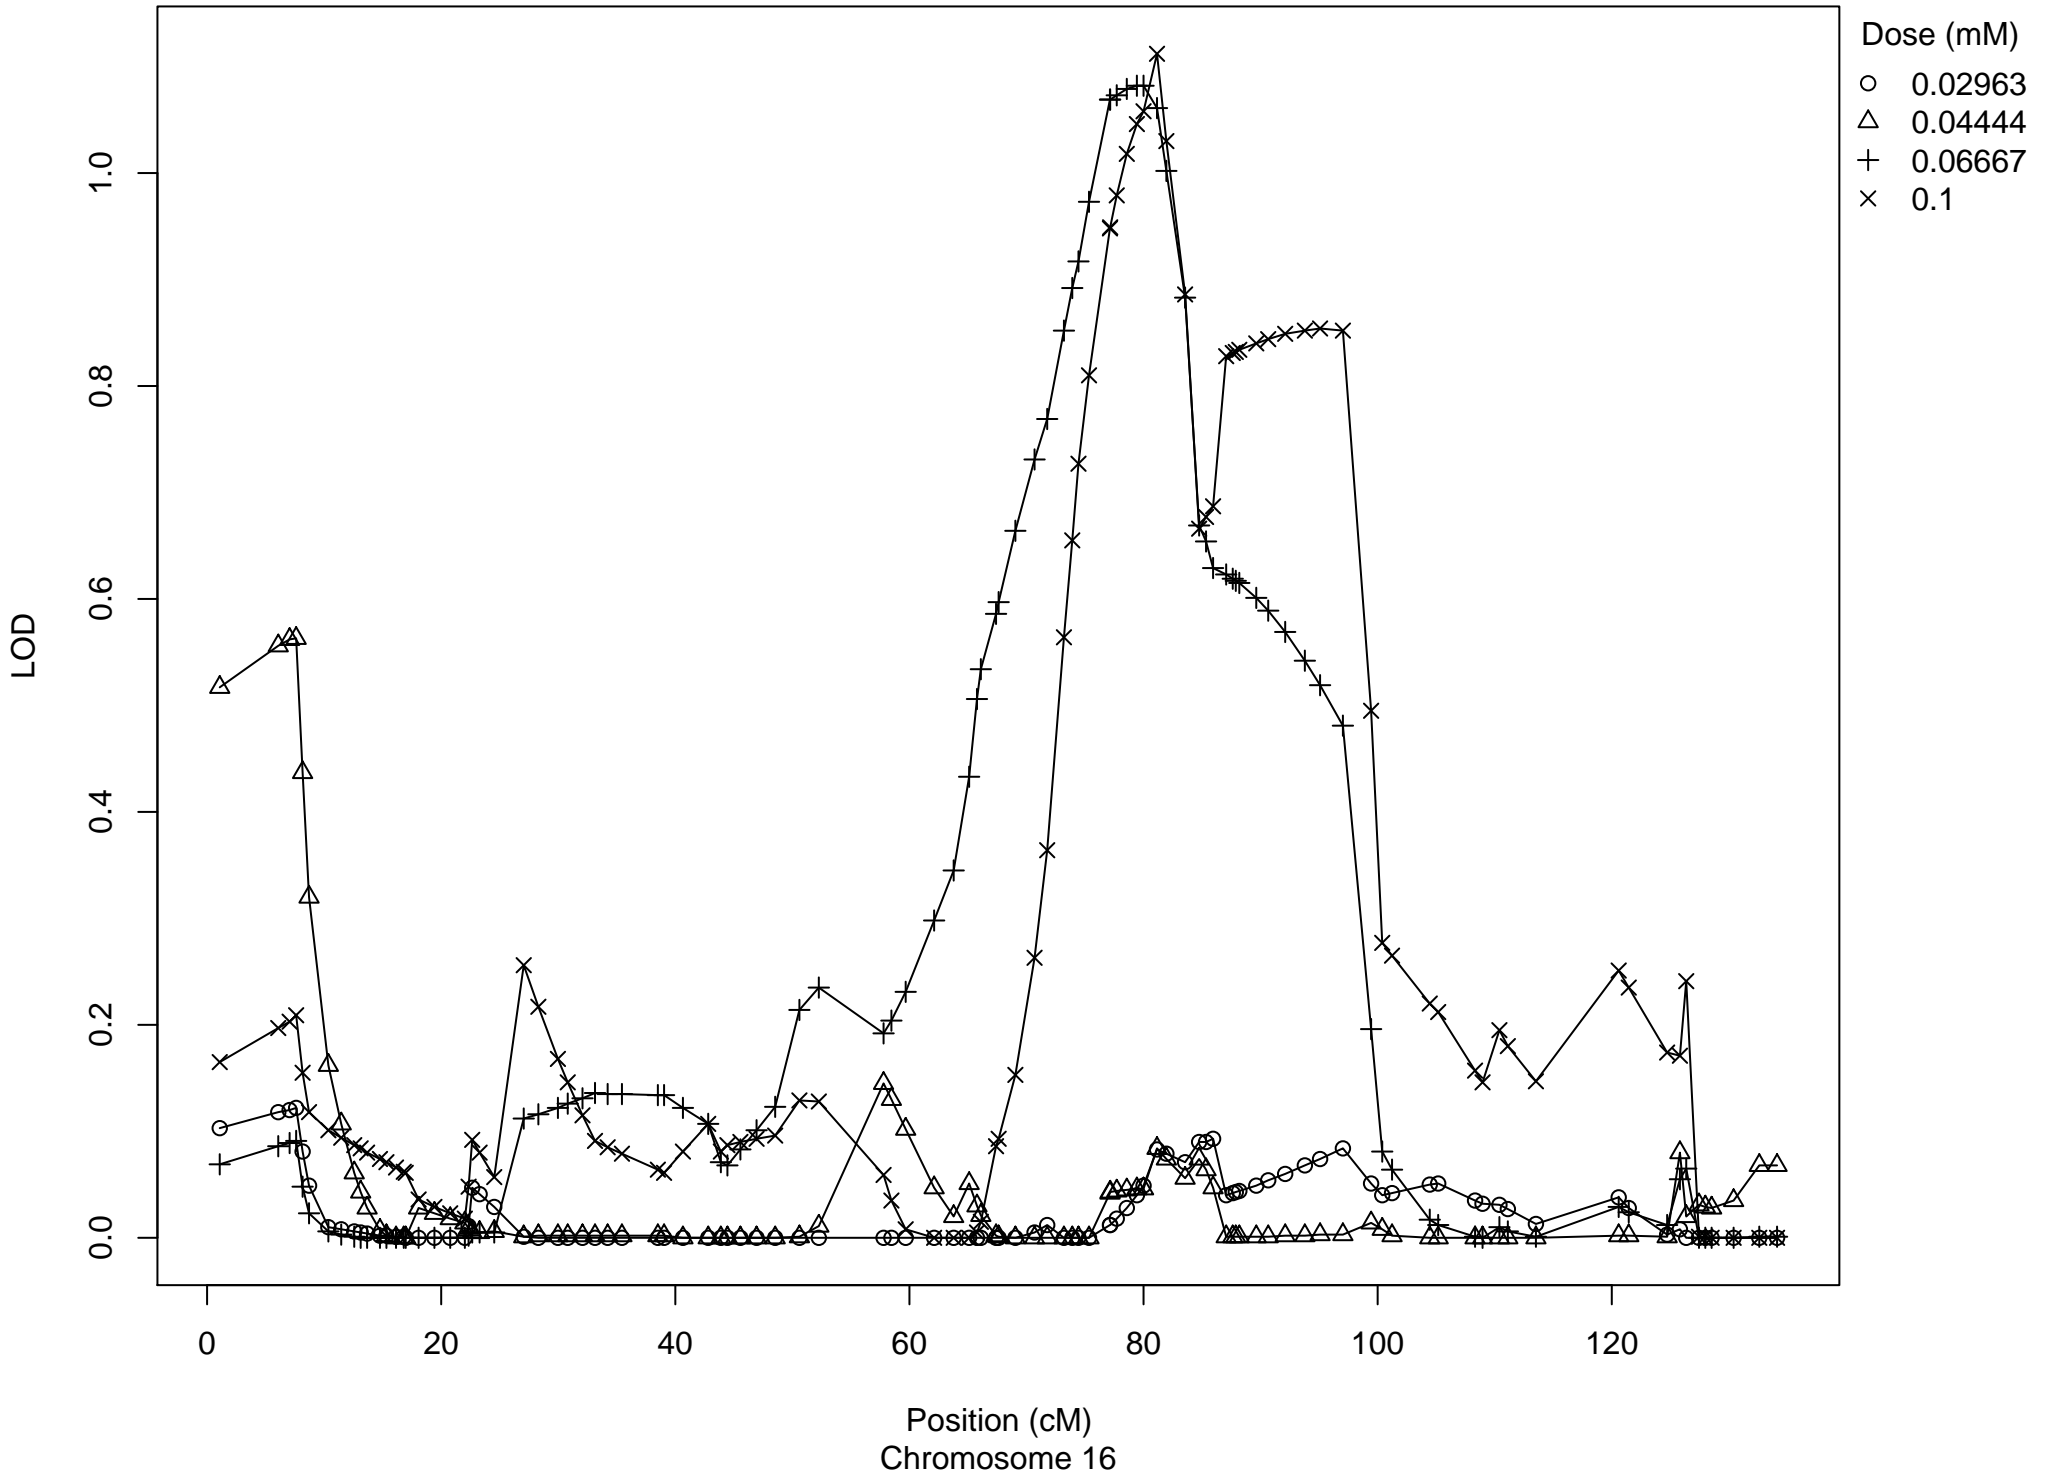

# Arsenic III Oxide (Arsen)

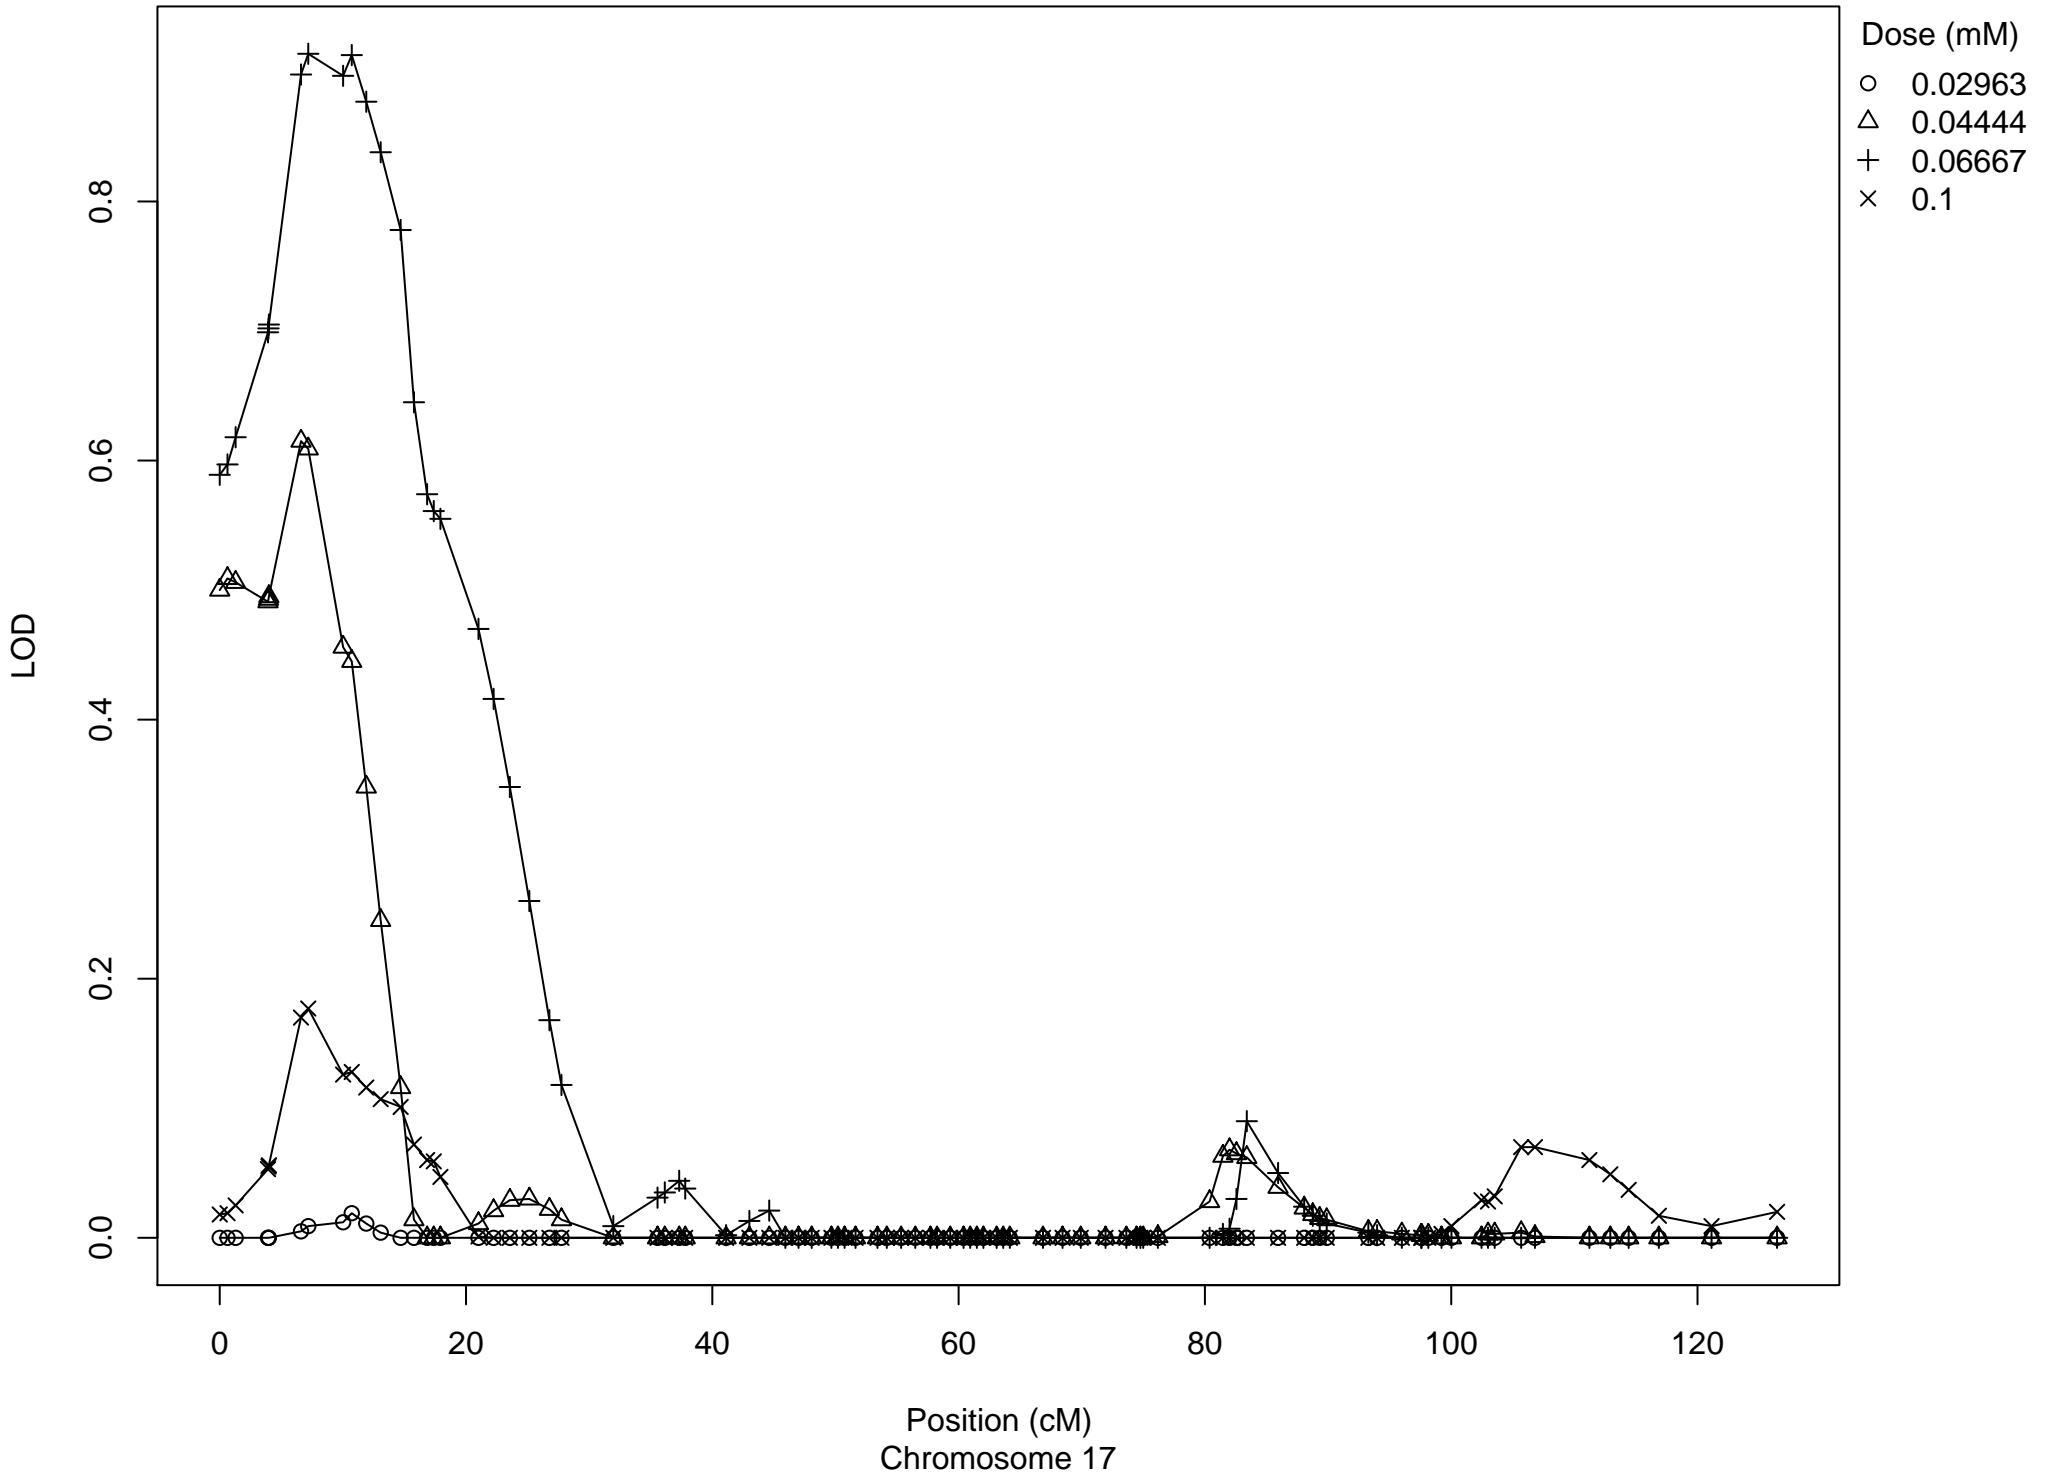

# Arsenic III Oxide (Arsen)

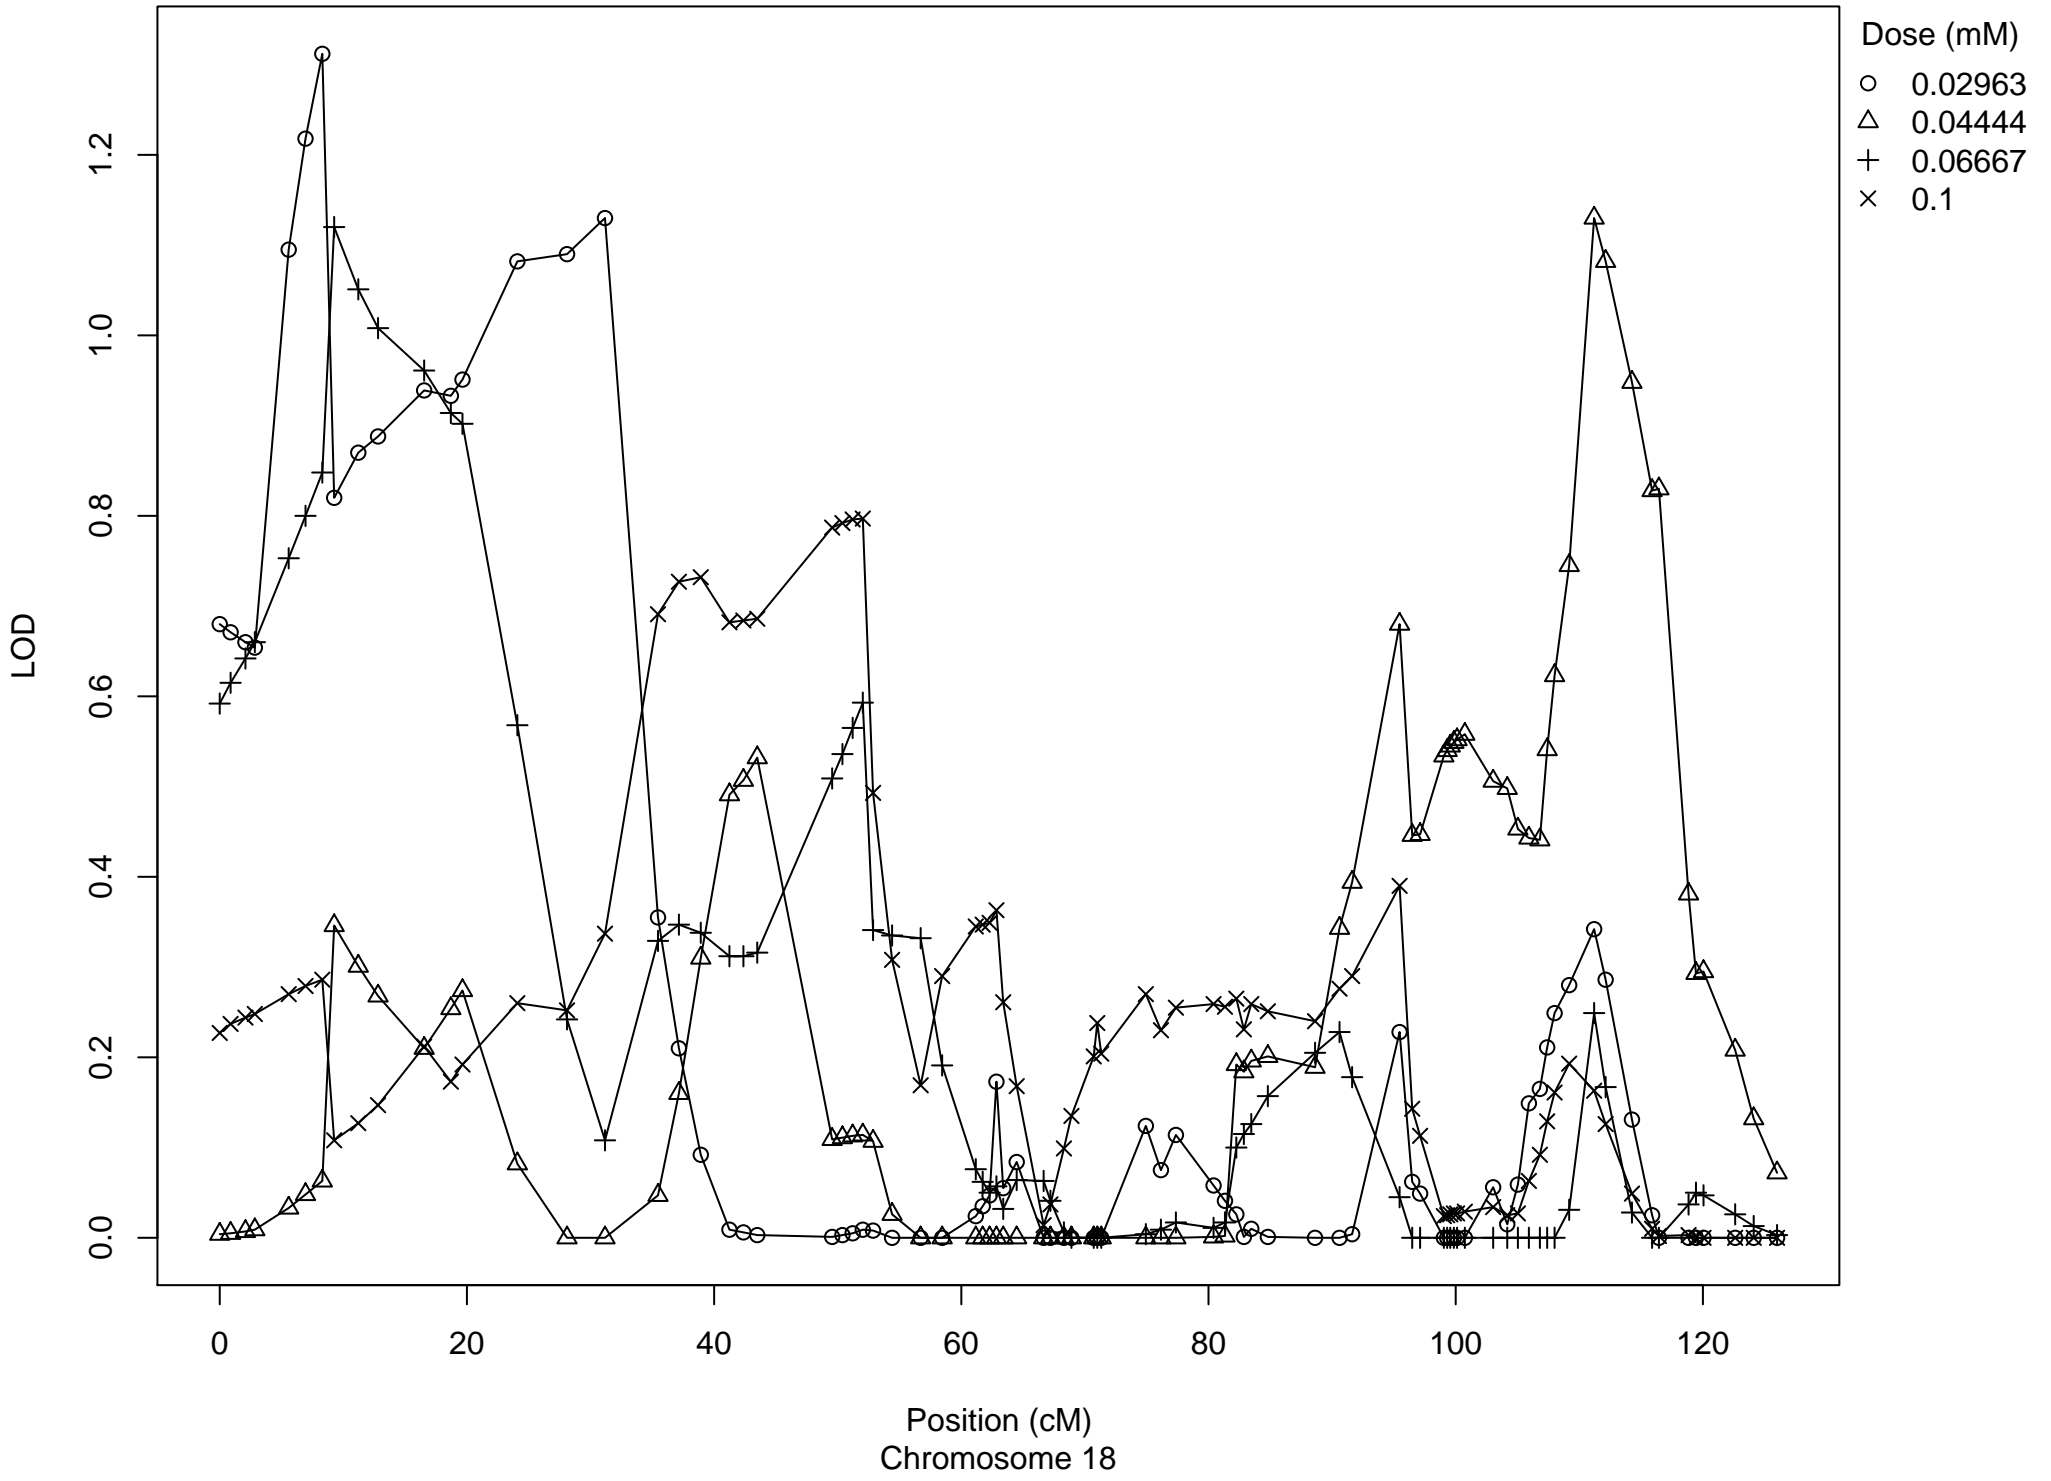



# Arsenic III Oxide (Arsen)

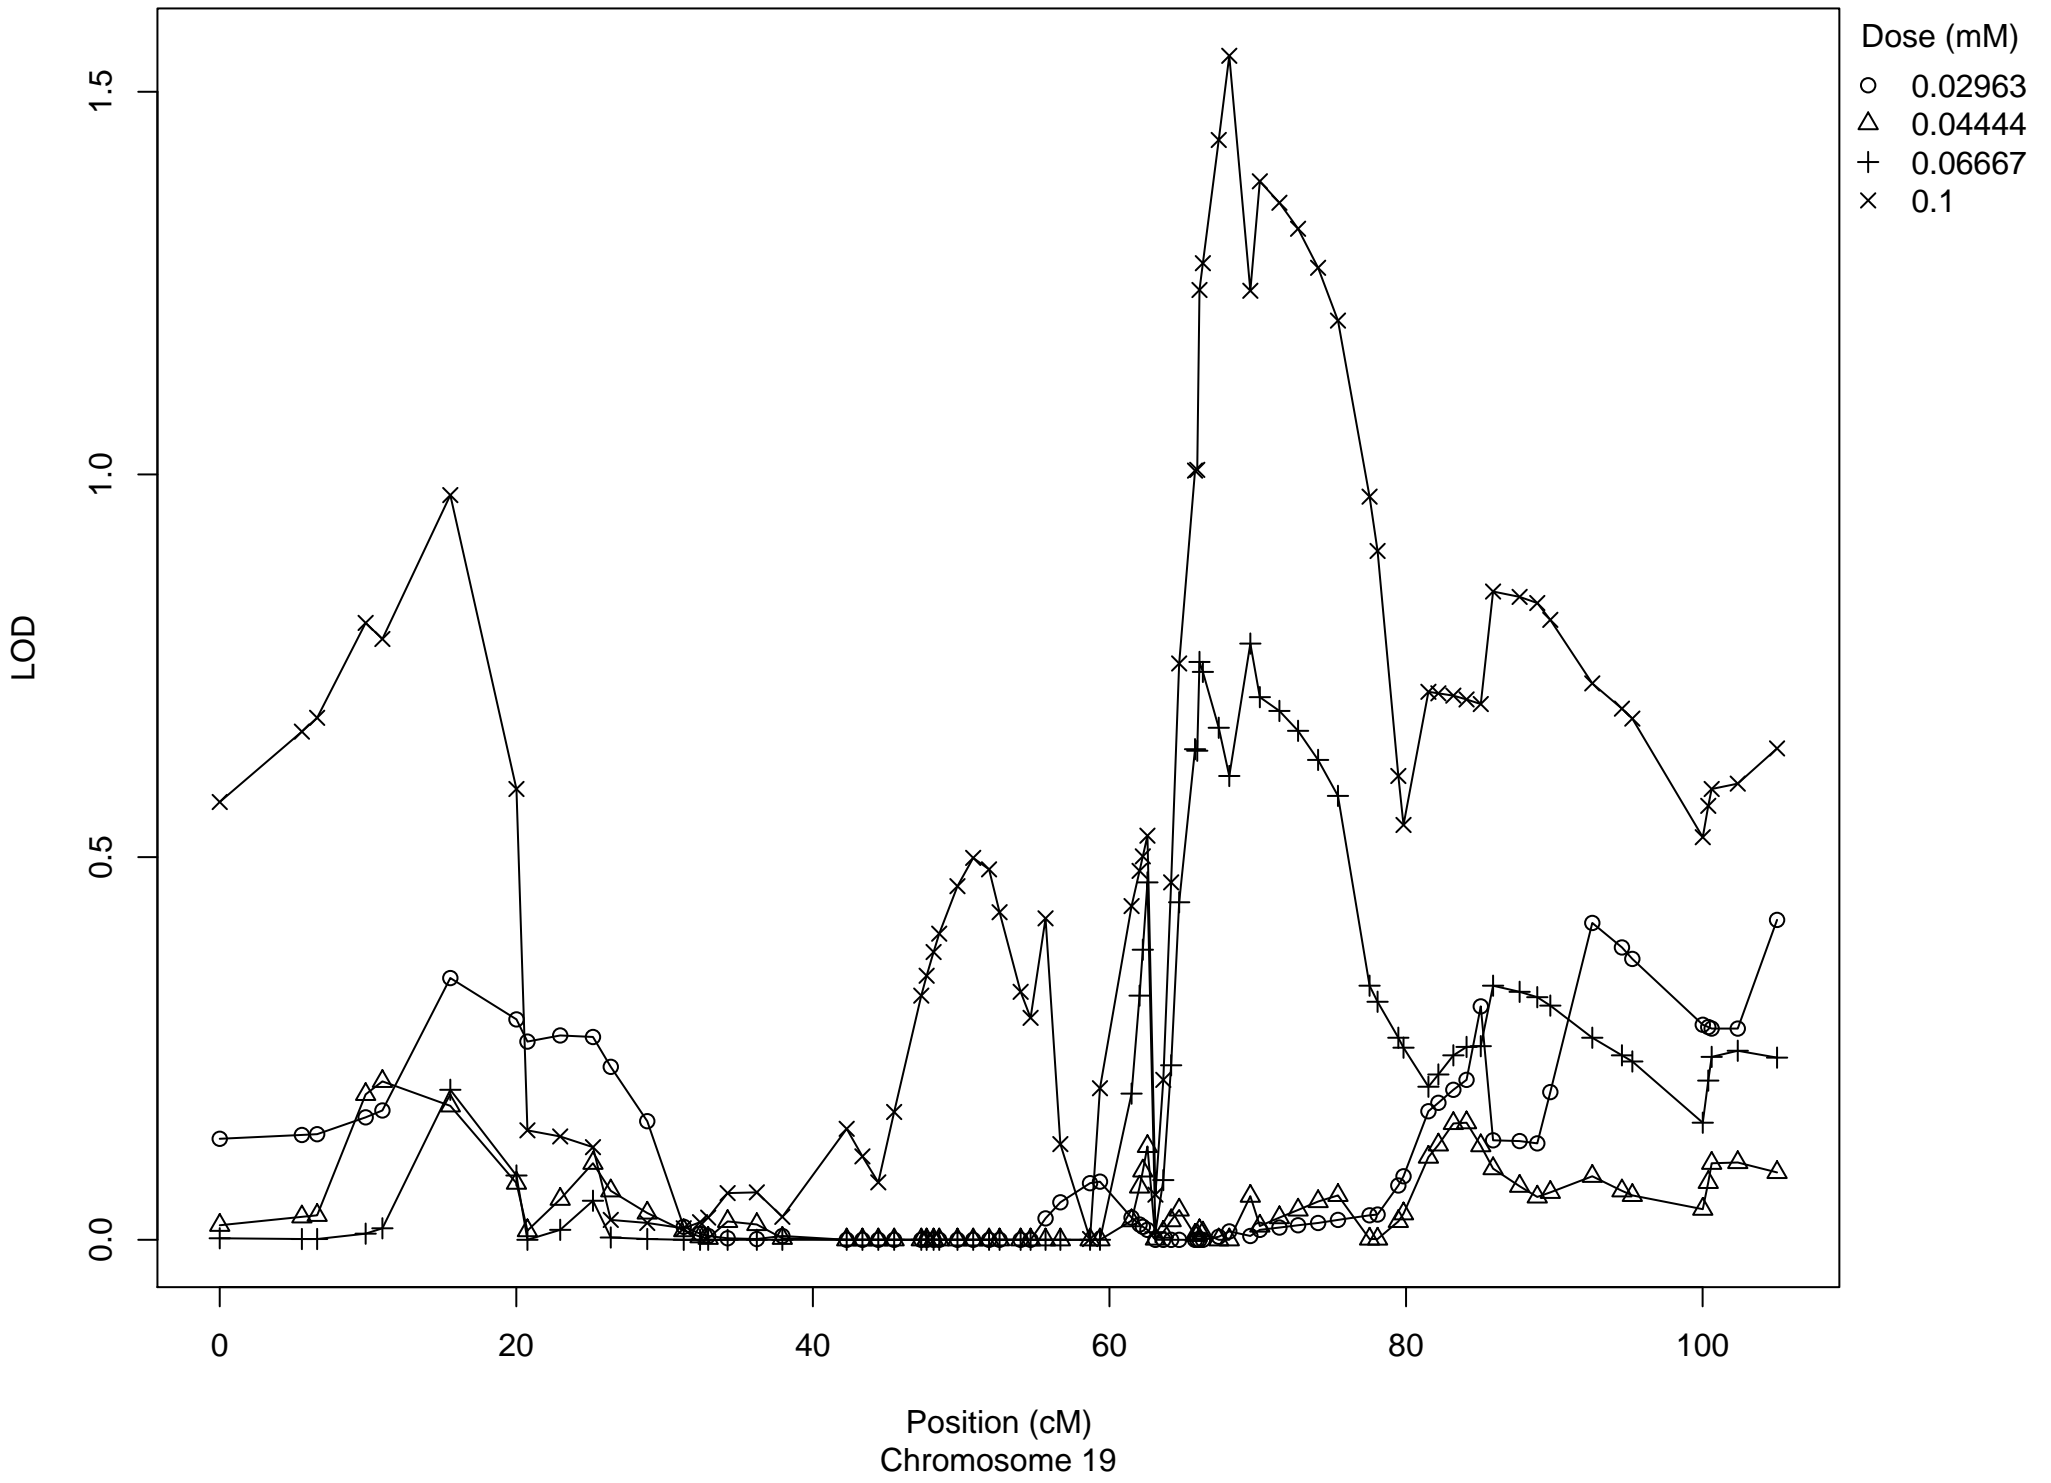

# Arsenic III Oxide (Arsen)

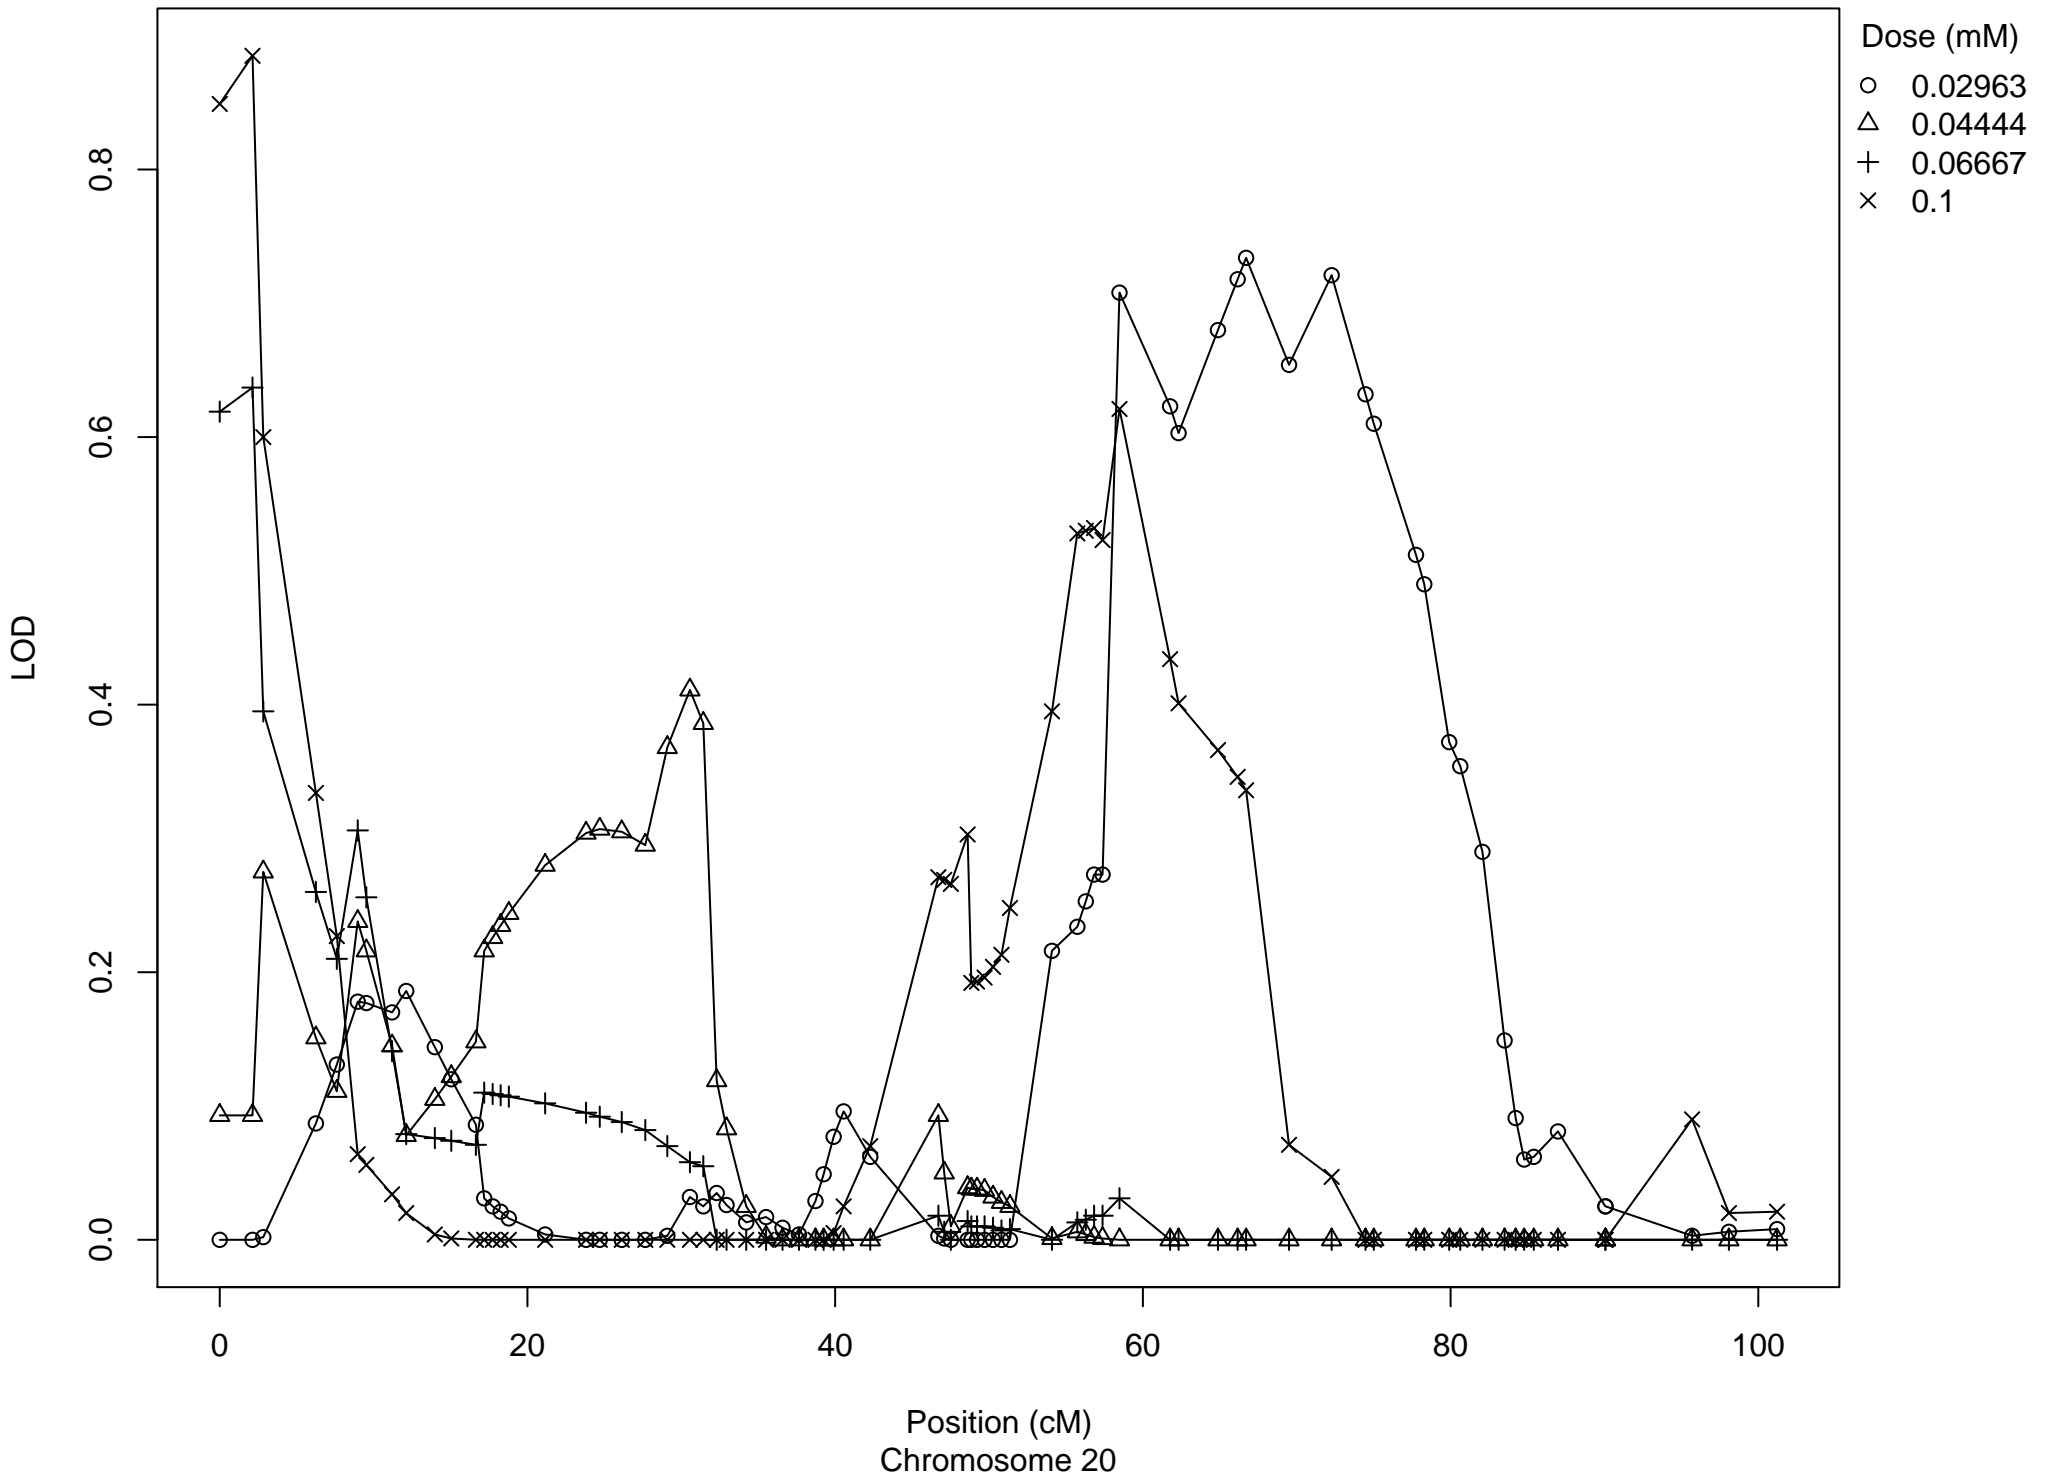

# Arsenic III Oxide (Arsen)

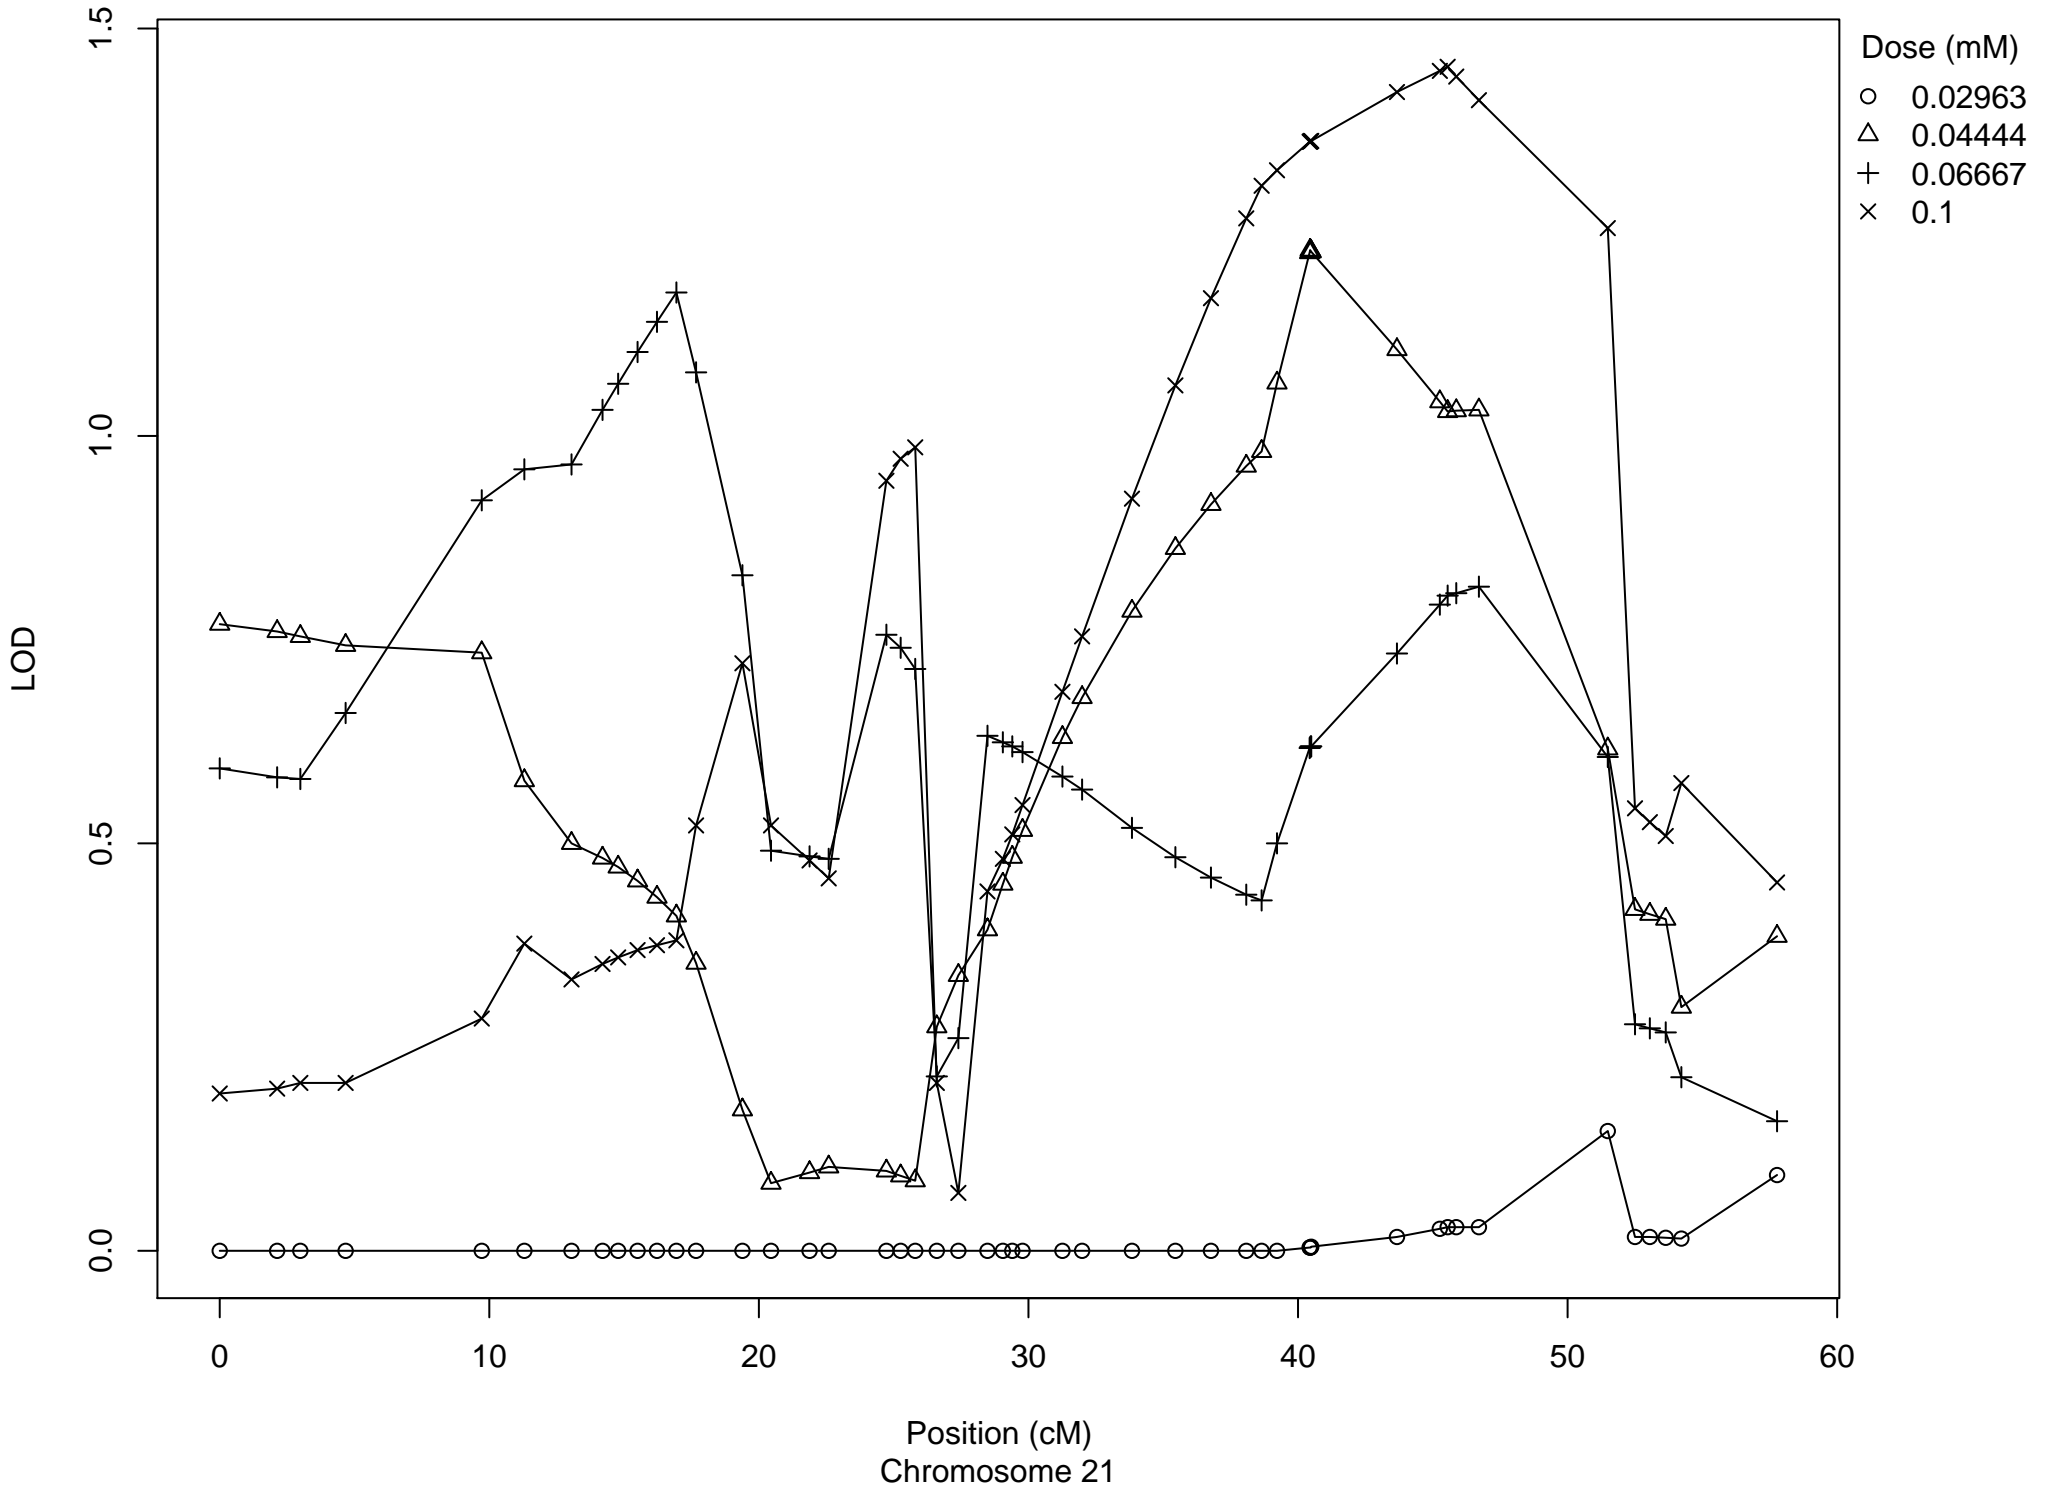

# Arsenic III Oxide (Arsen)

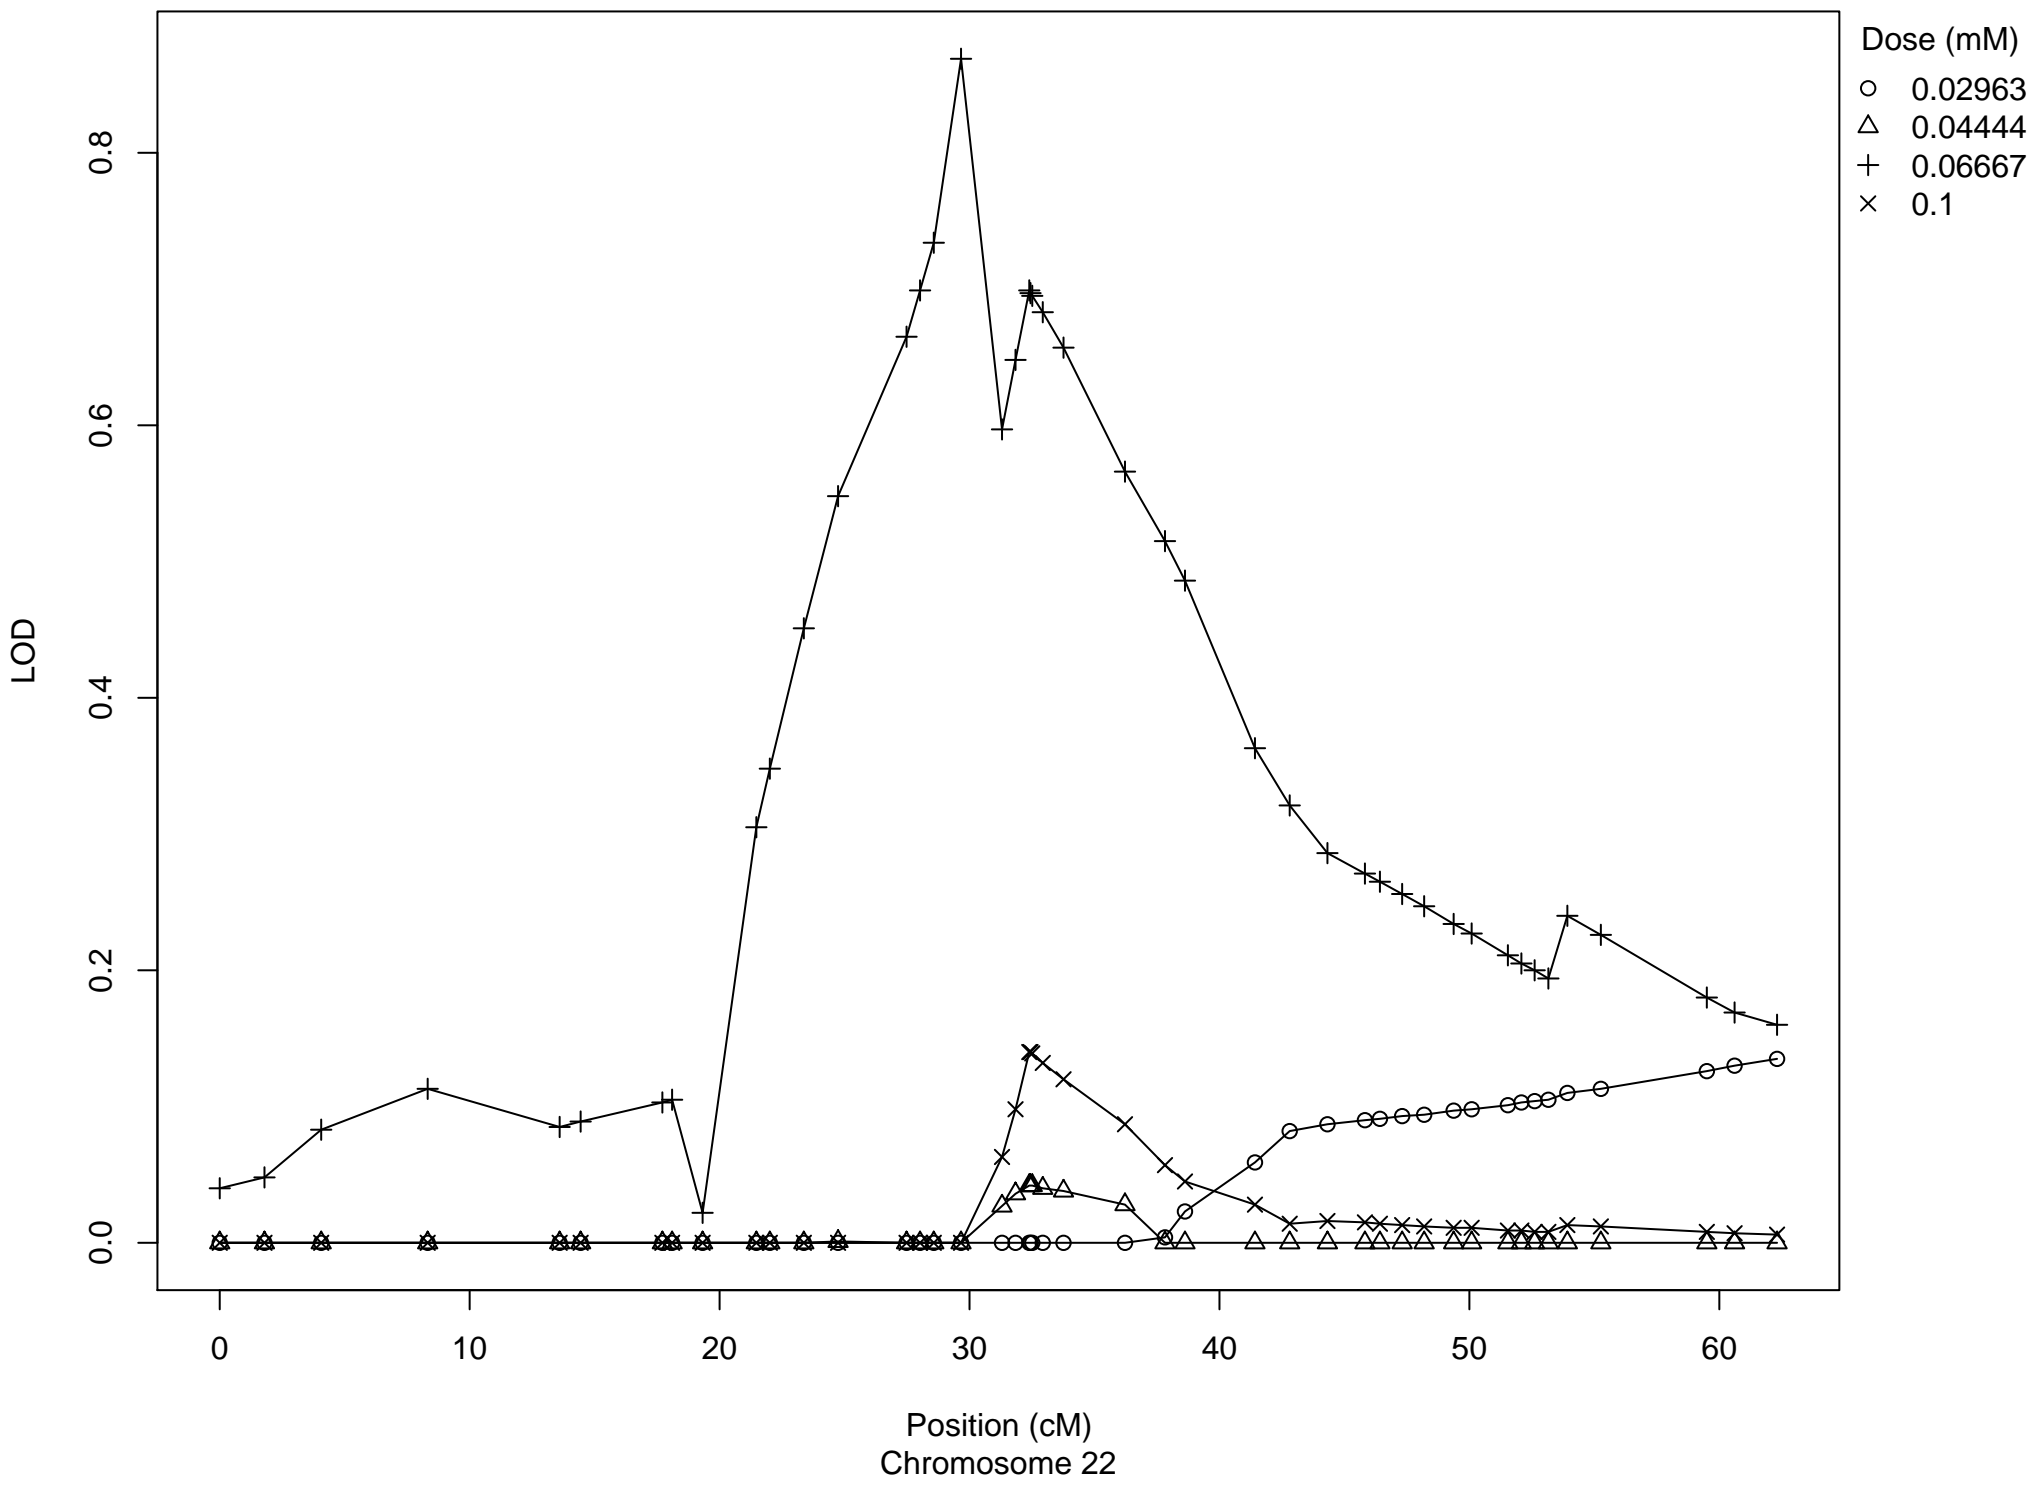

# Bleomycin sulfate (Bleo)

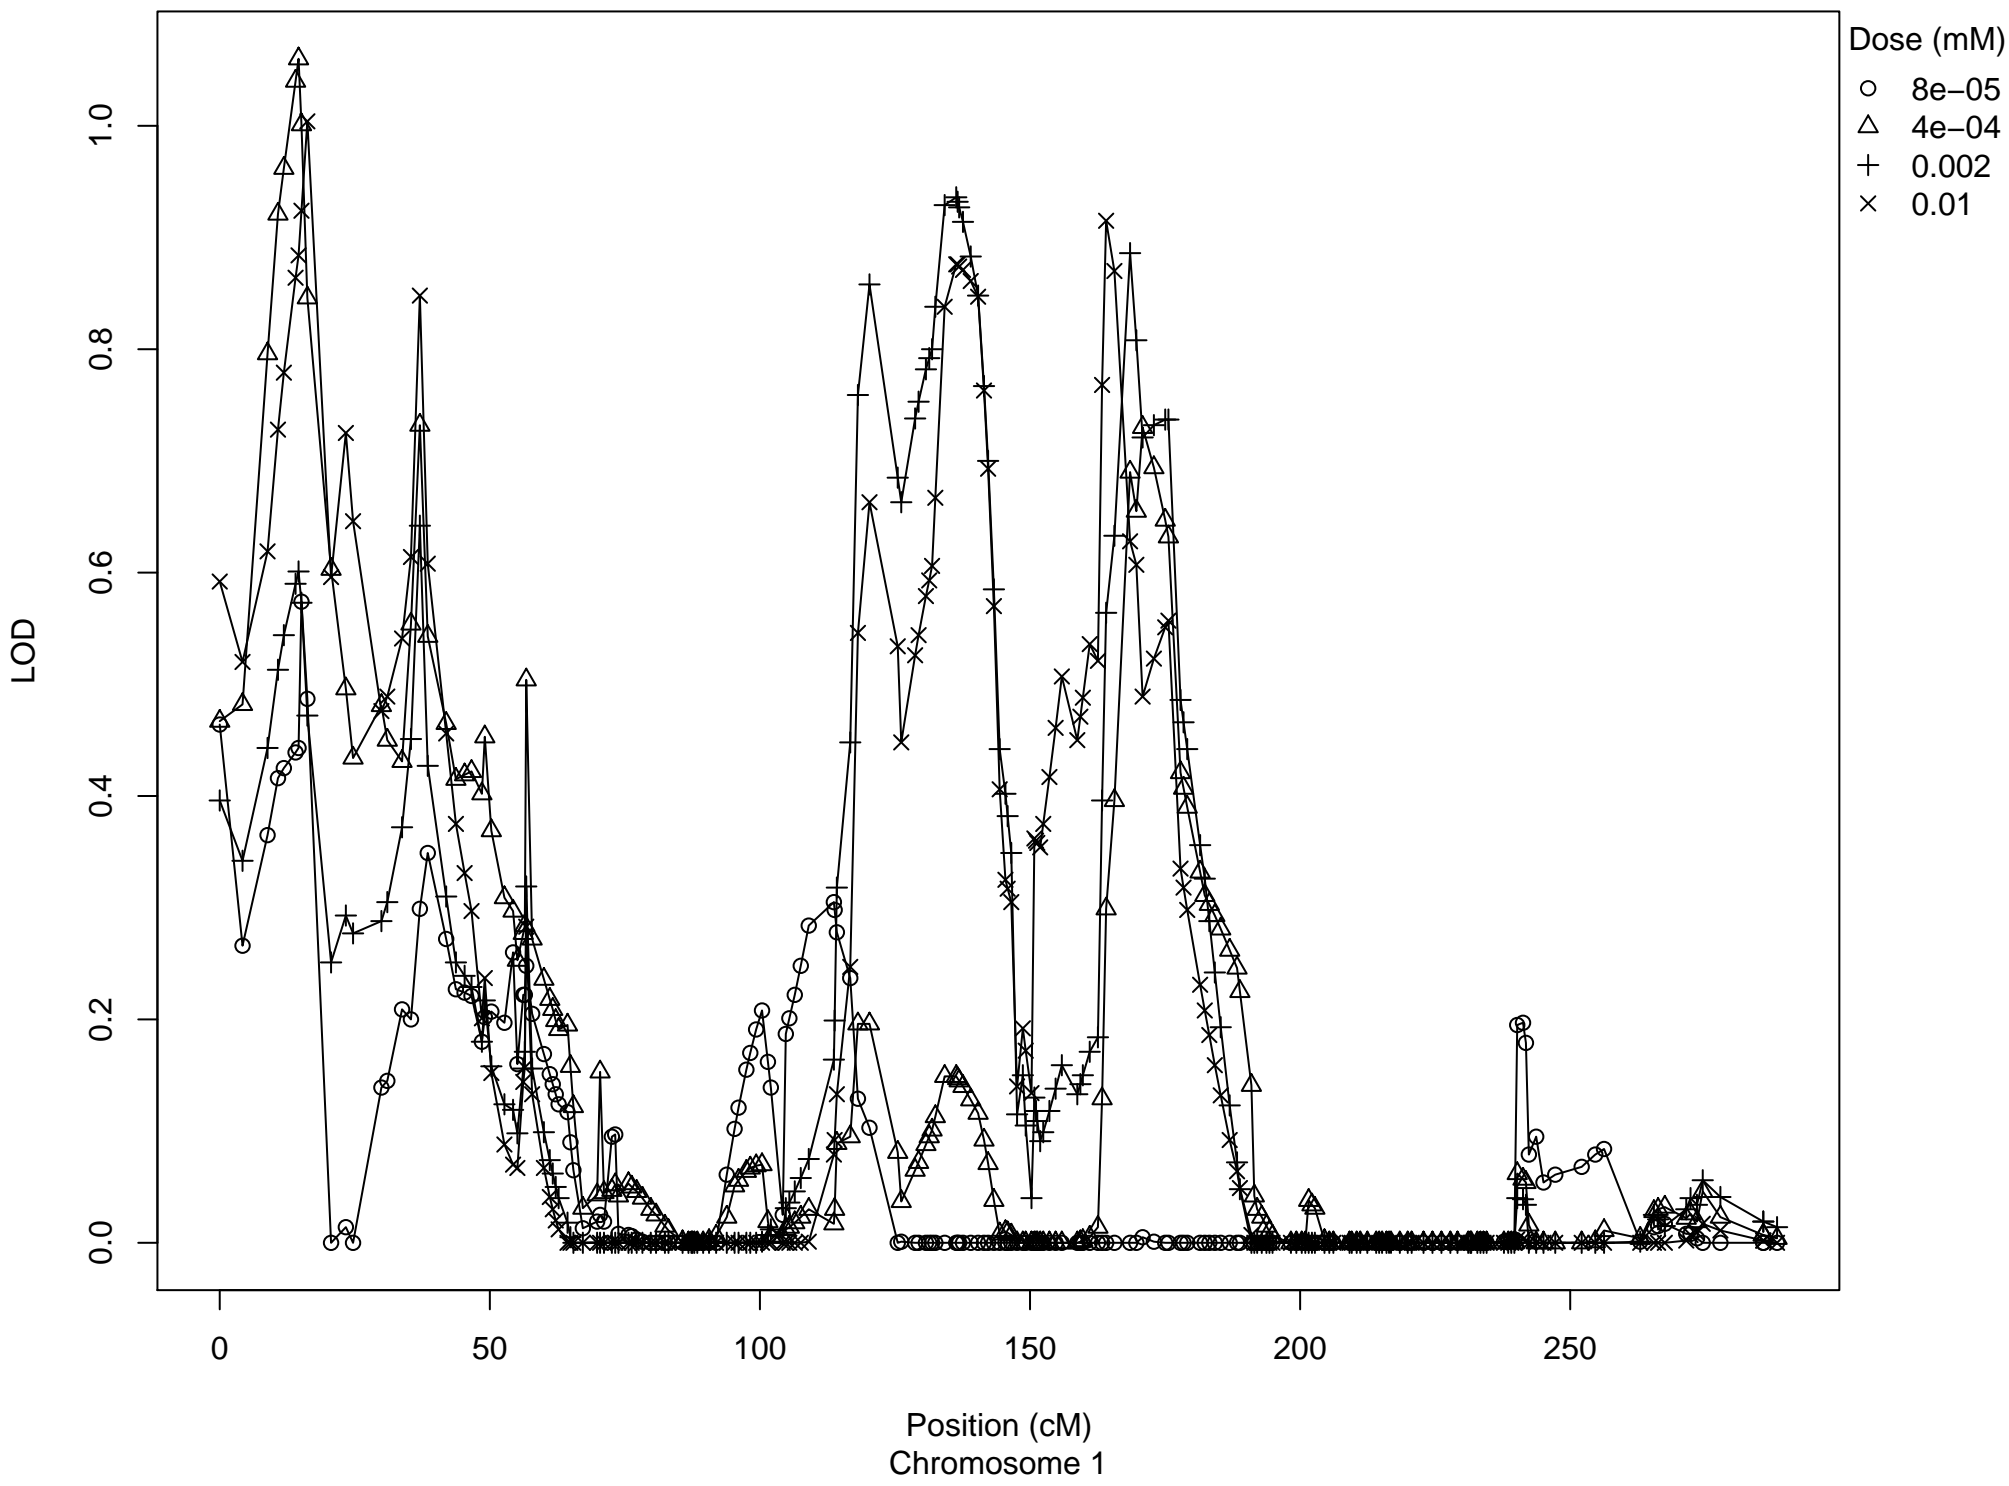

# Bleomycin sulfate (Bleo)

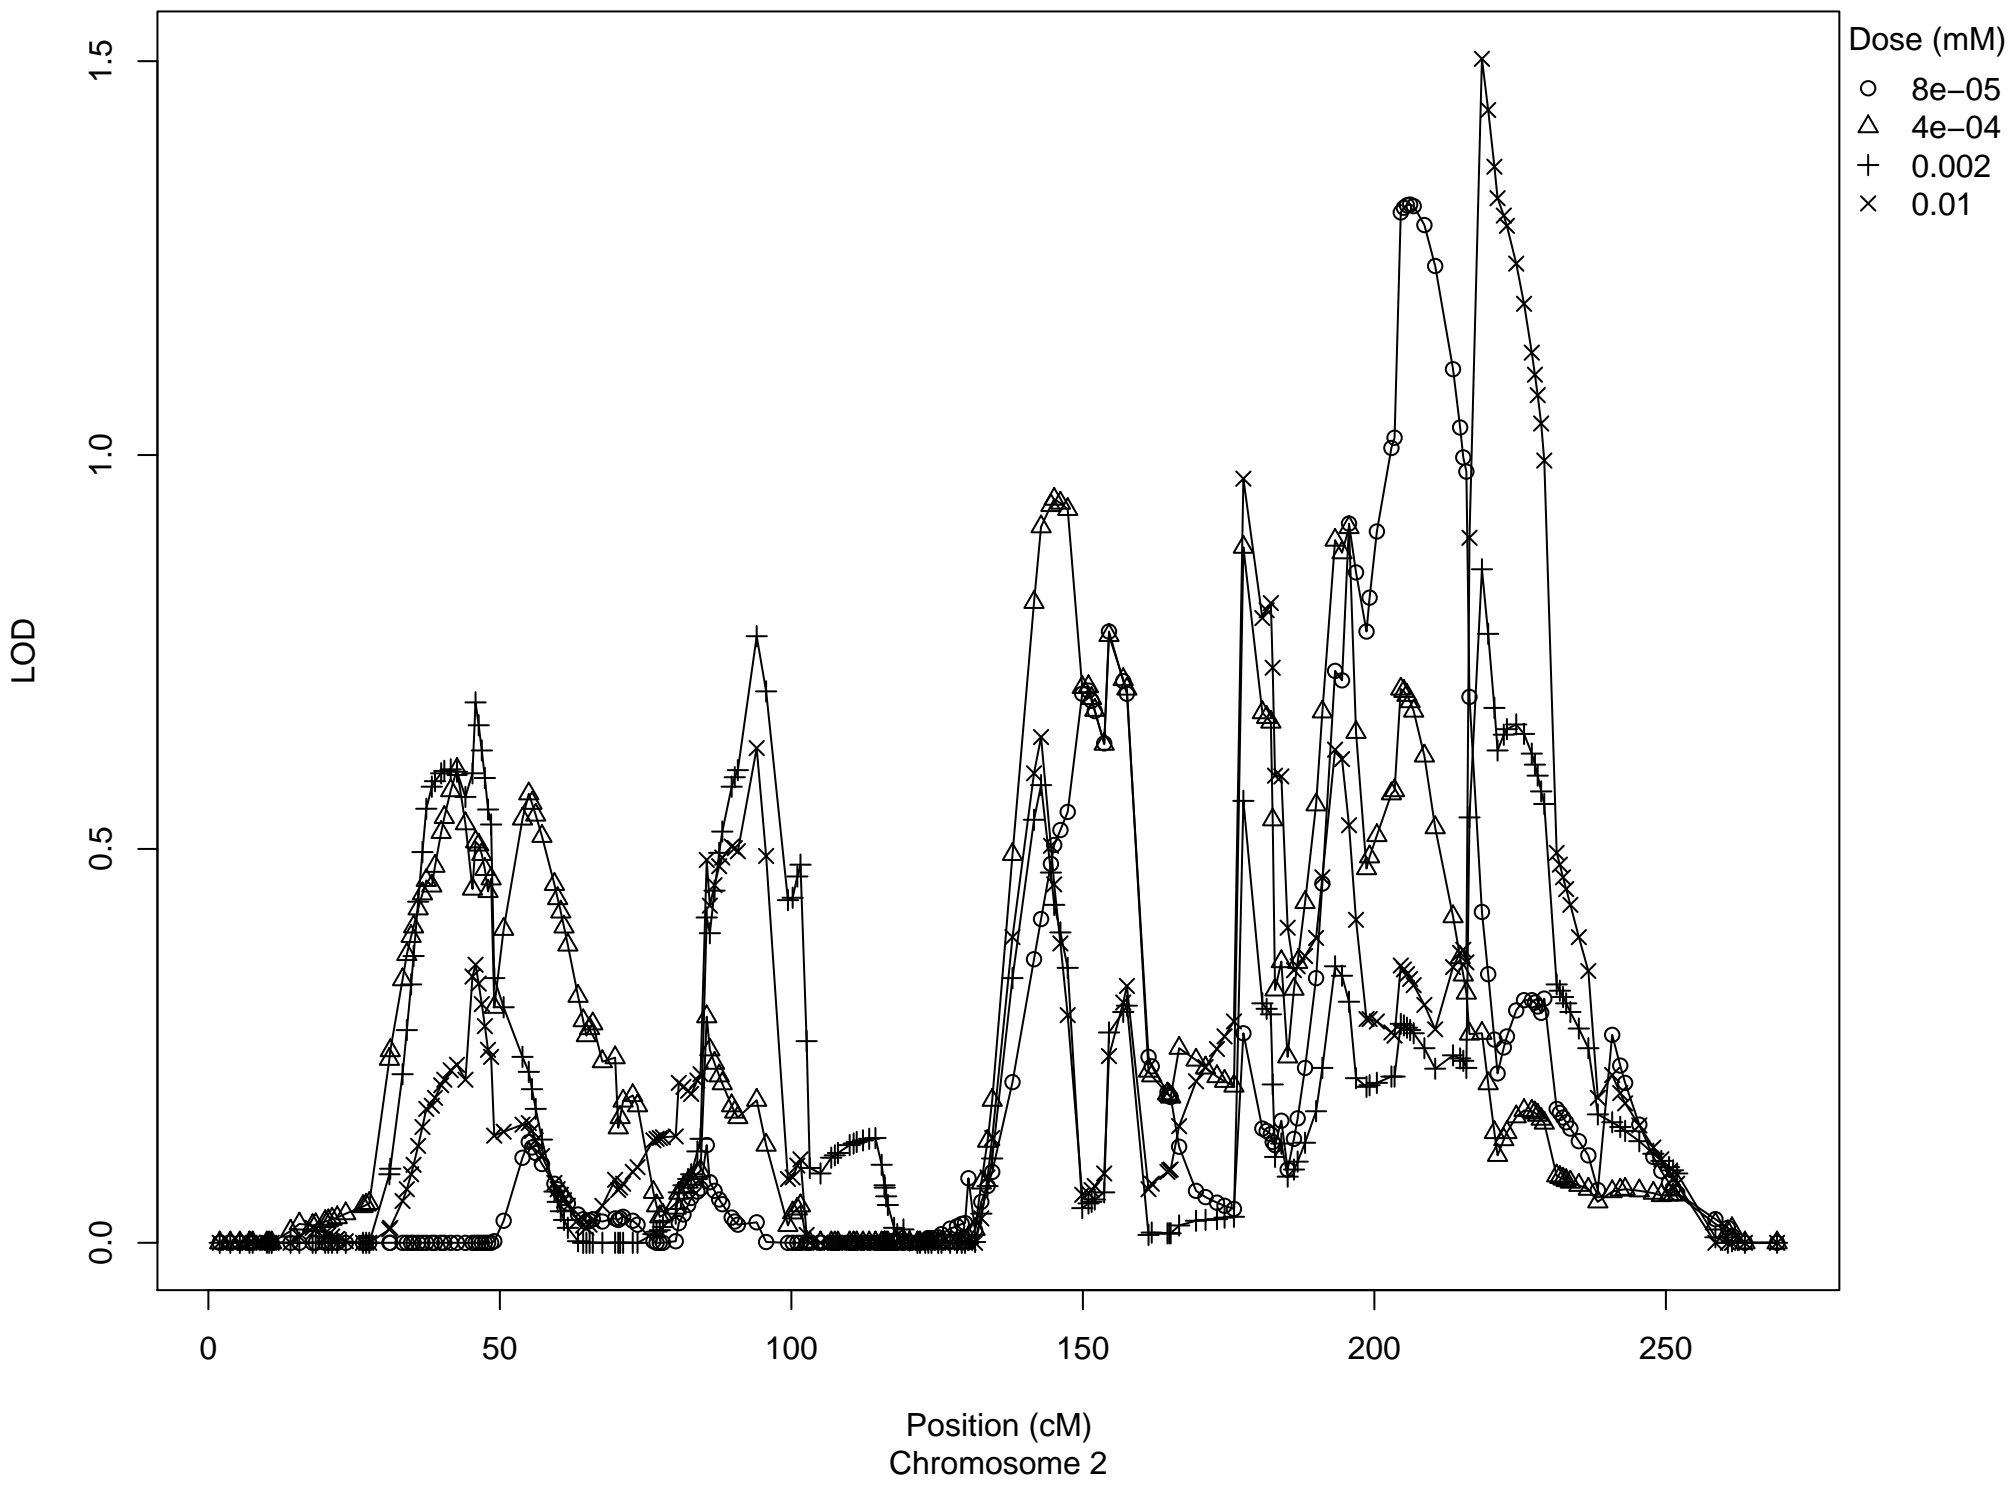

# Bleomycin sulfate (Bleo)

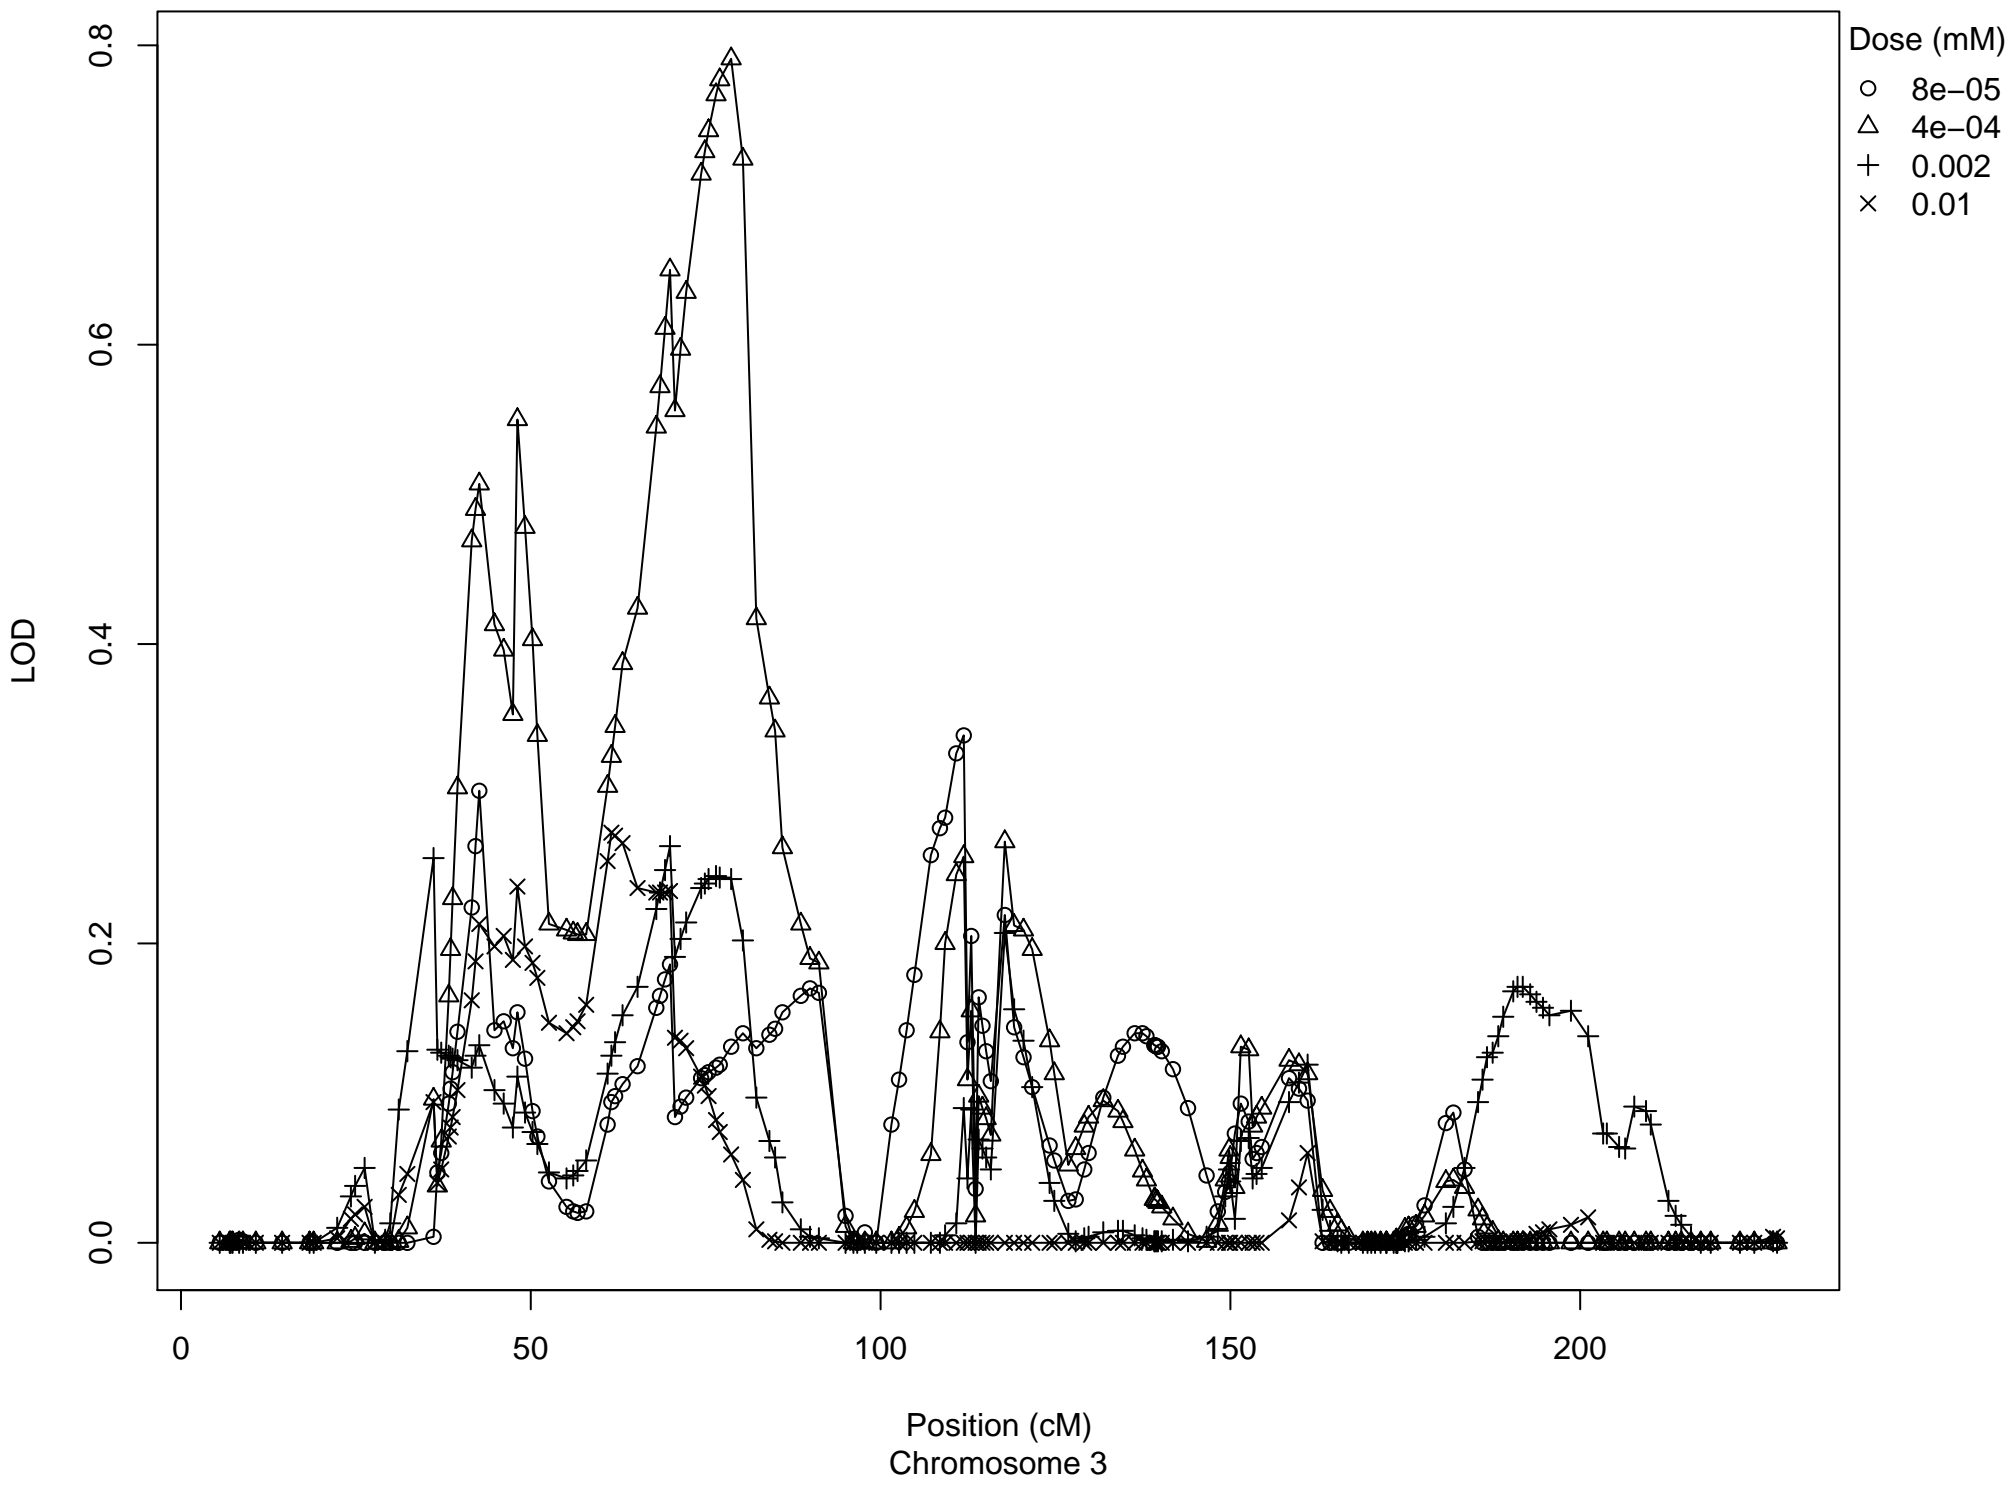

# Bleomycin sulfate (Bleo)

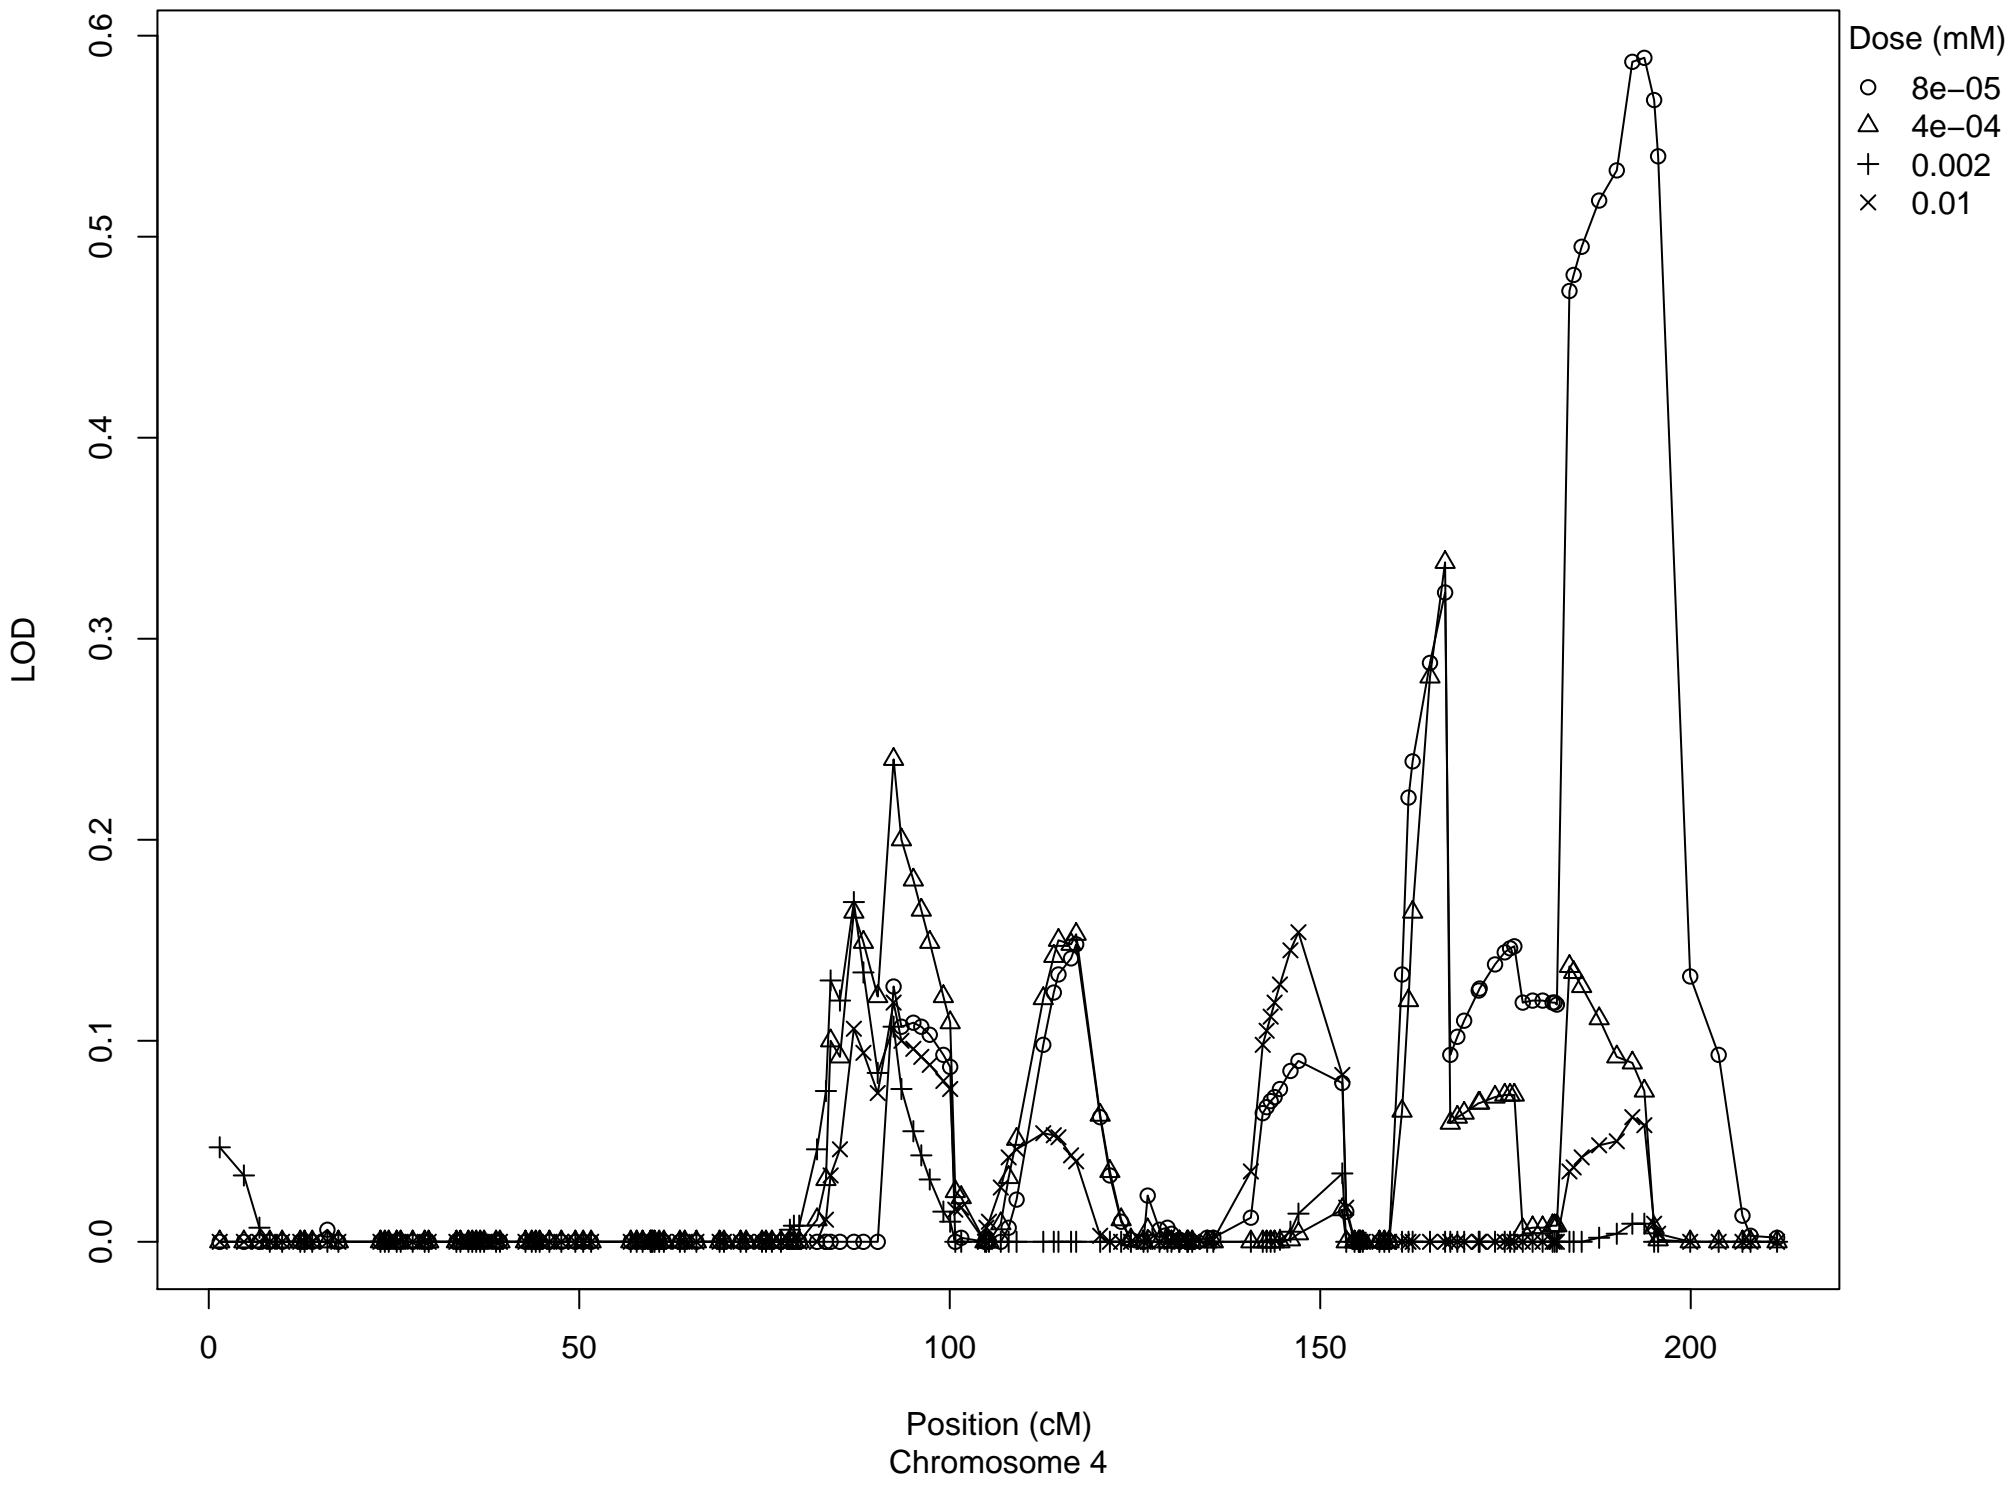



# Bleomycin sulfate (Bleo)

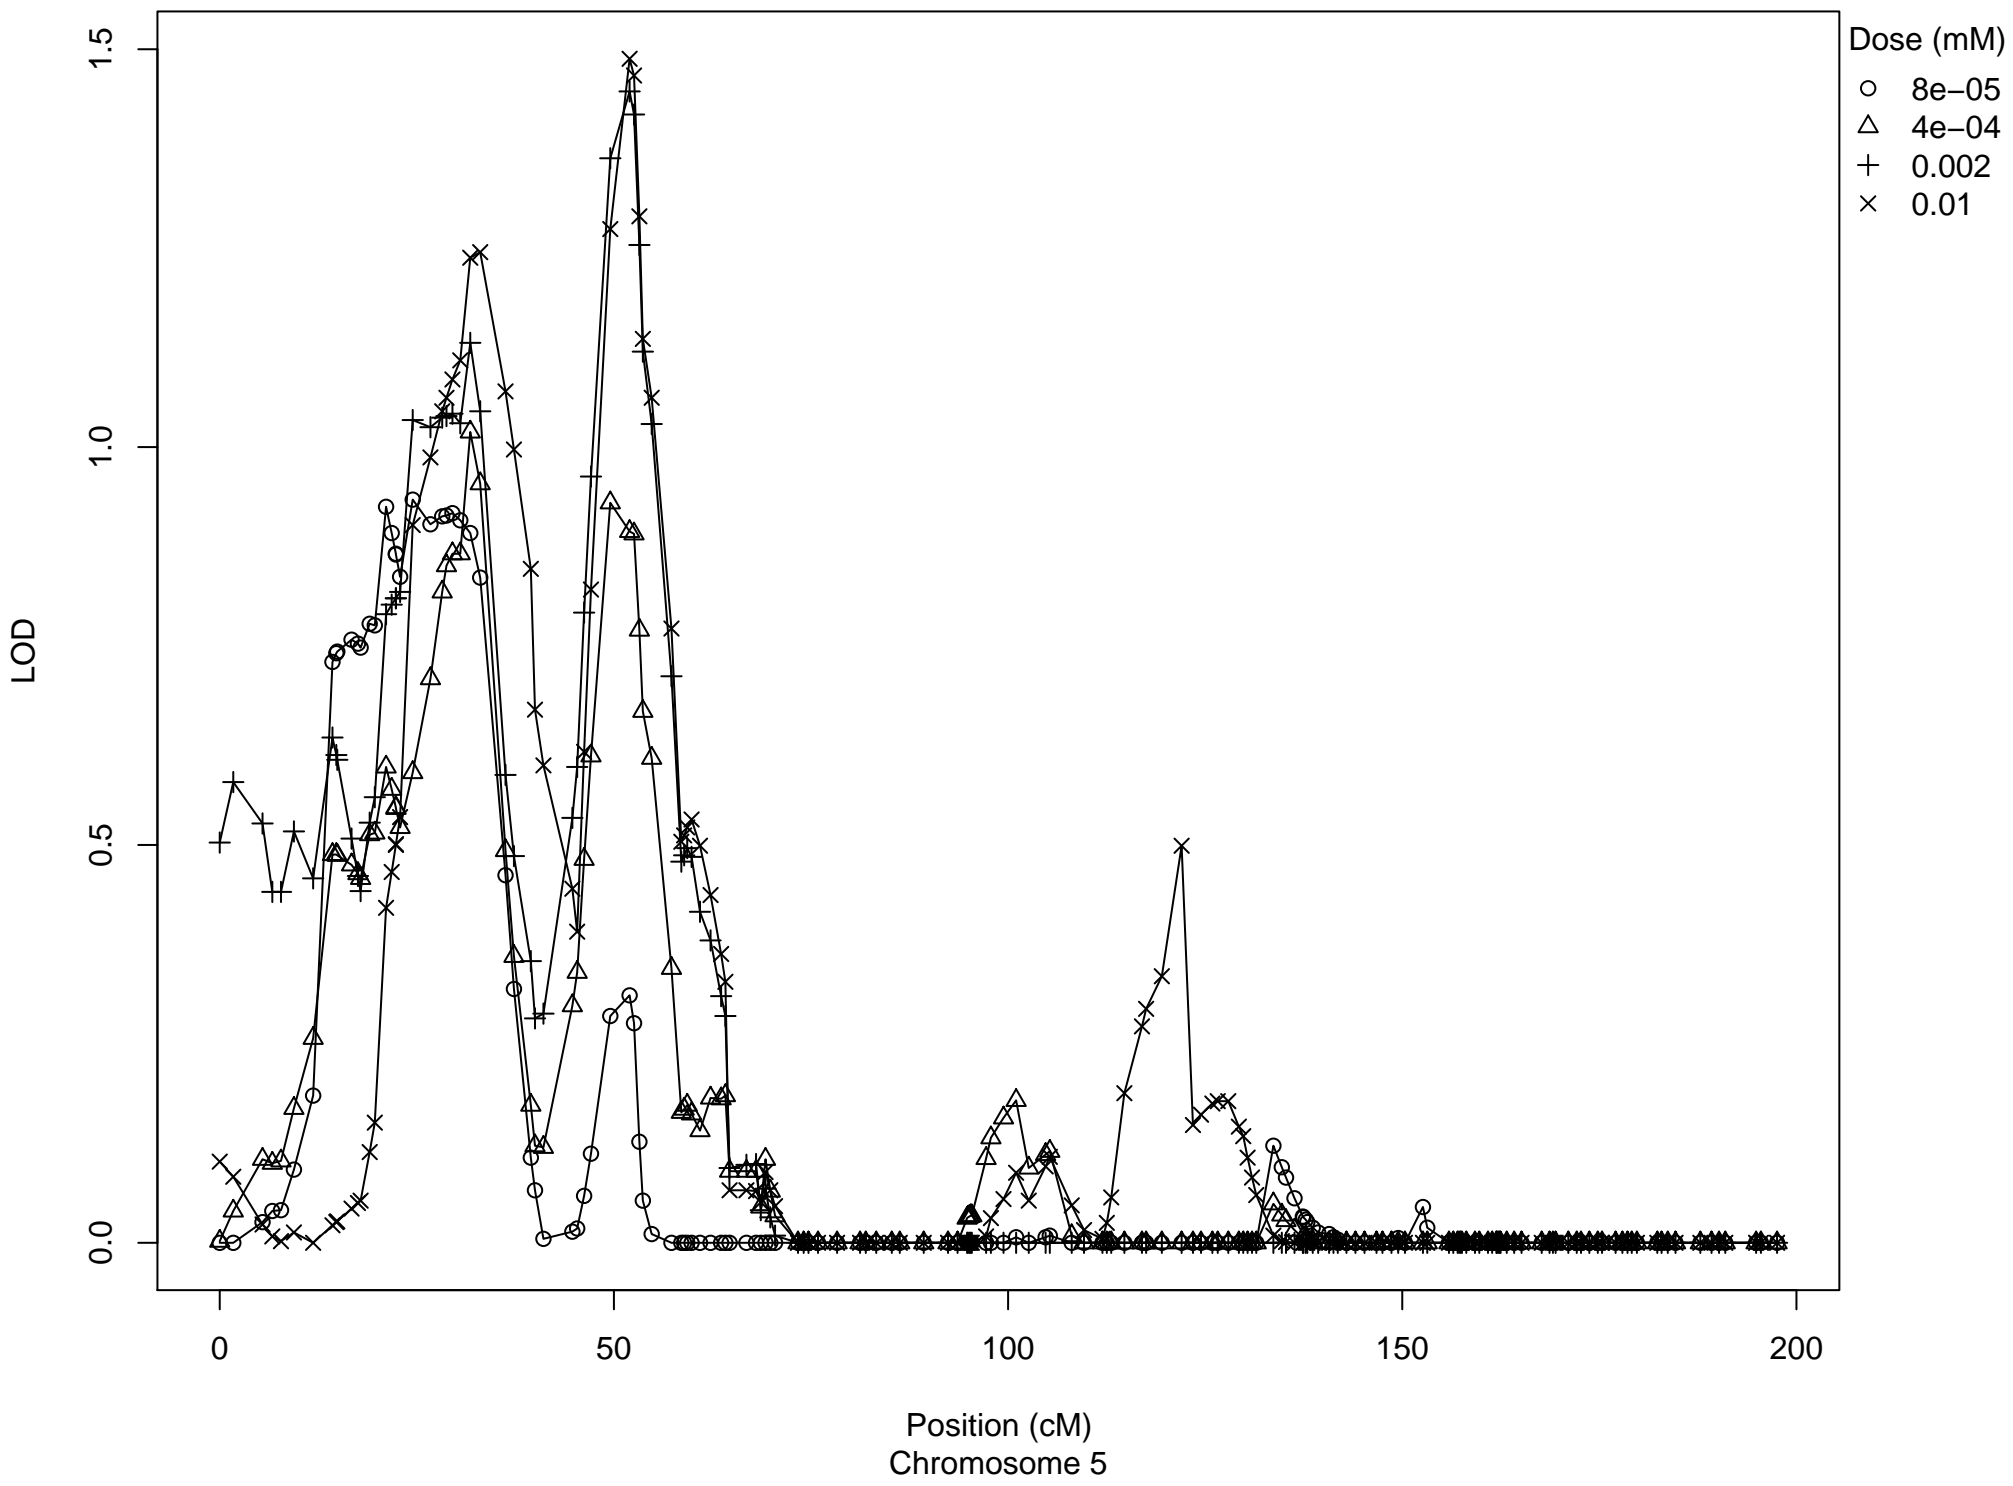

# Bleomycin sulfate (Bleo)

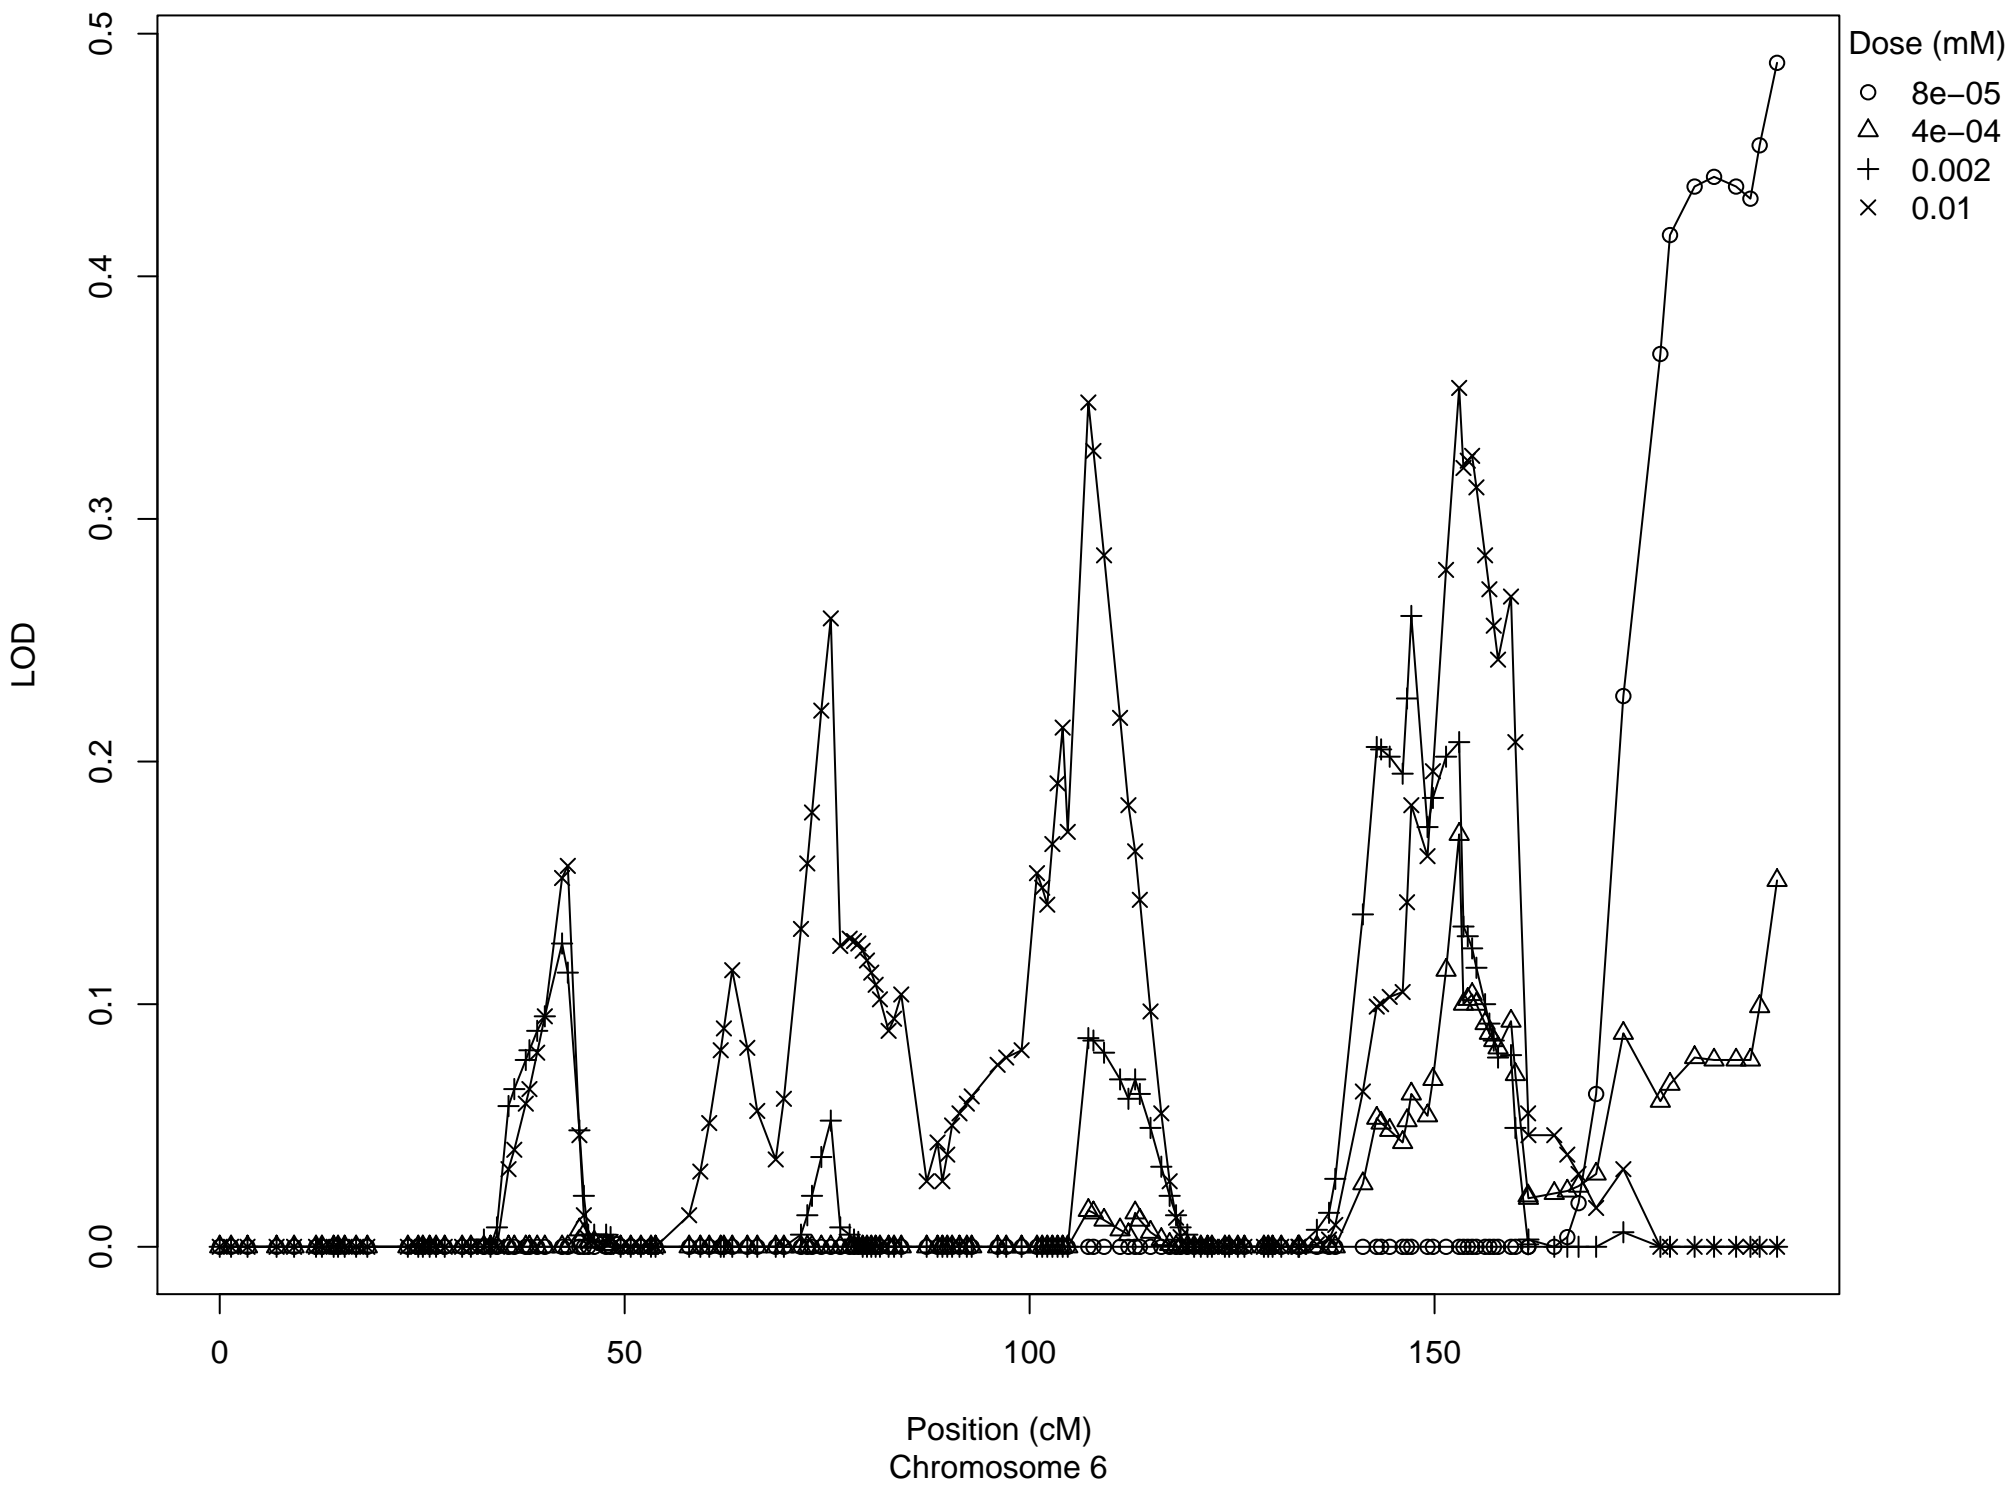

# Bleomycin sulfate (Bleo)

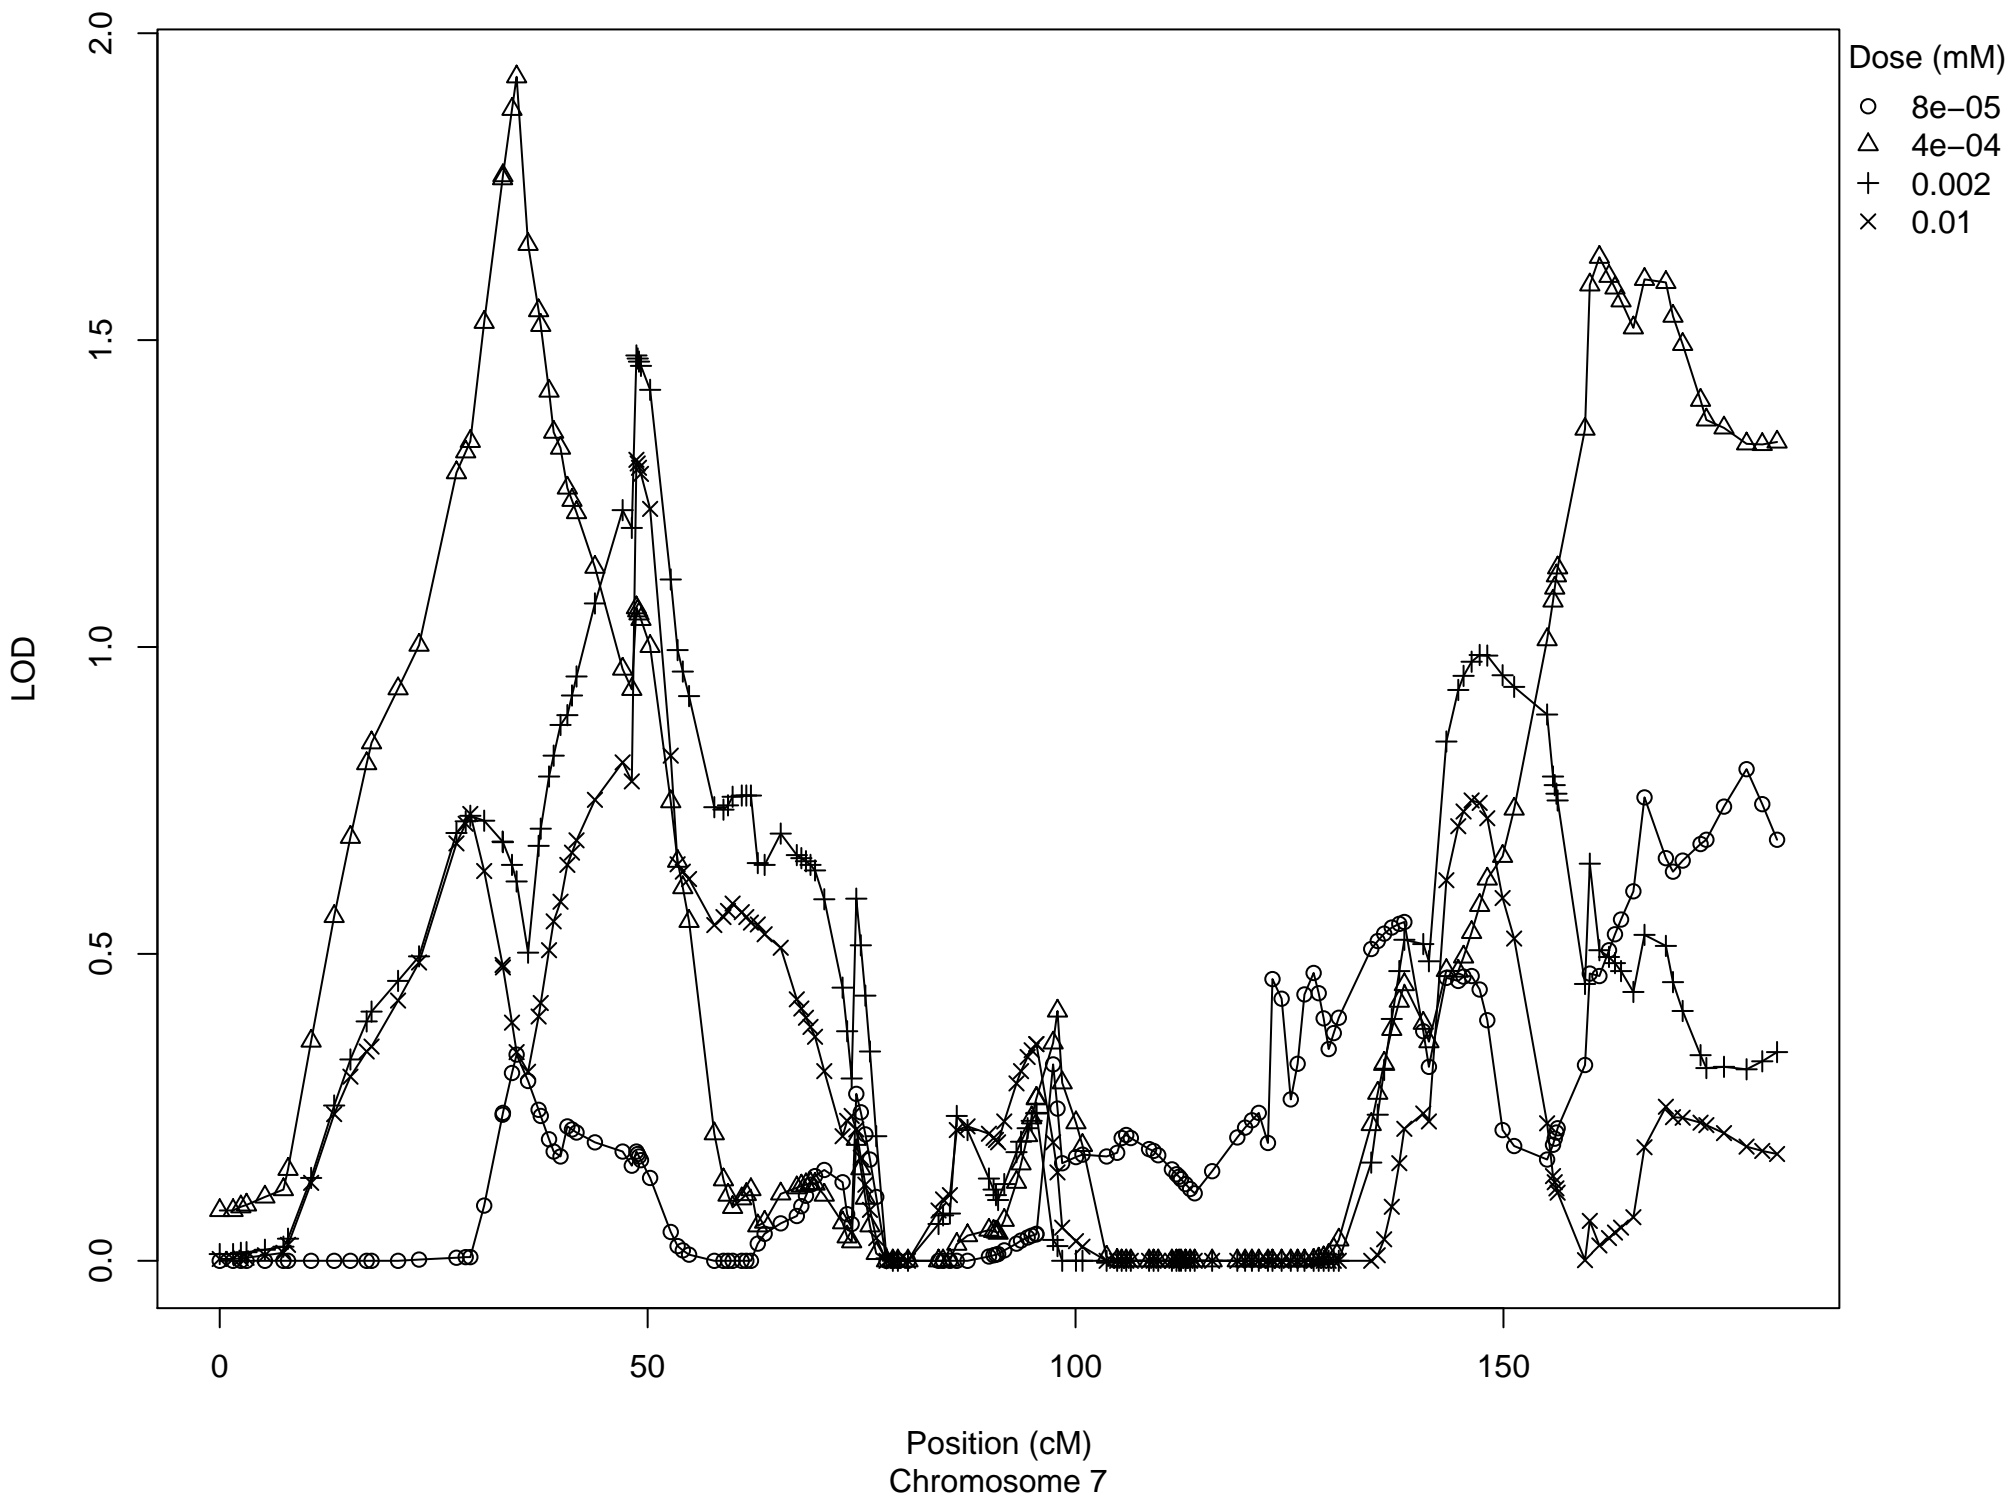

# Bleomycin sulfate (Bleo)

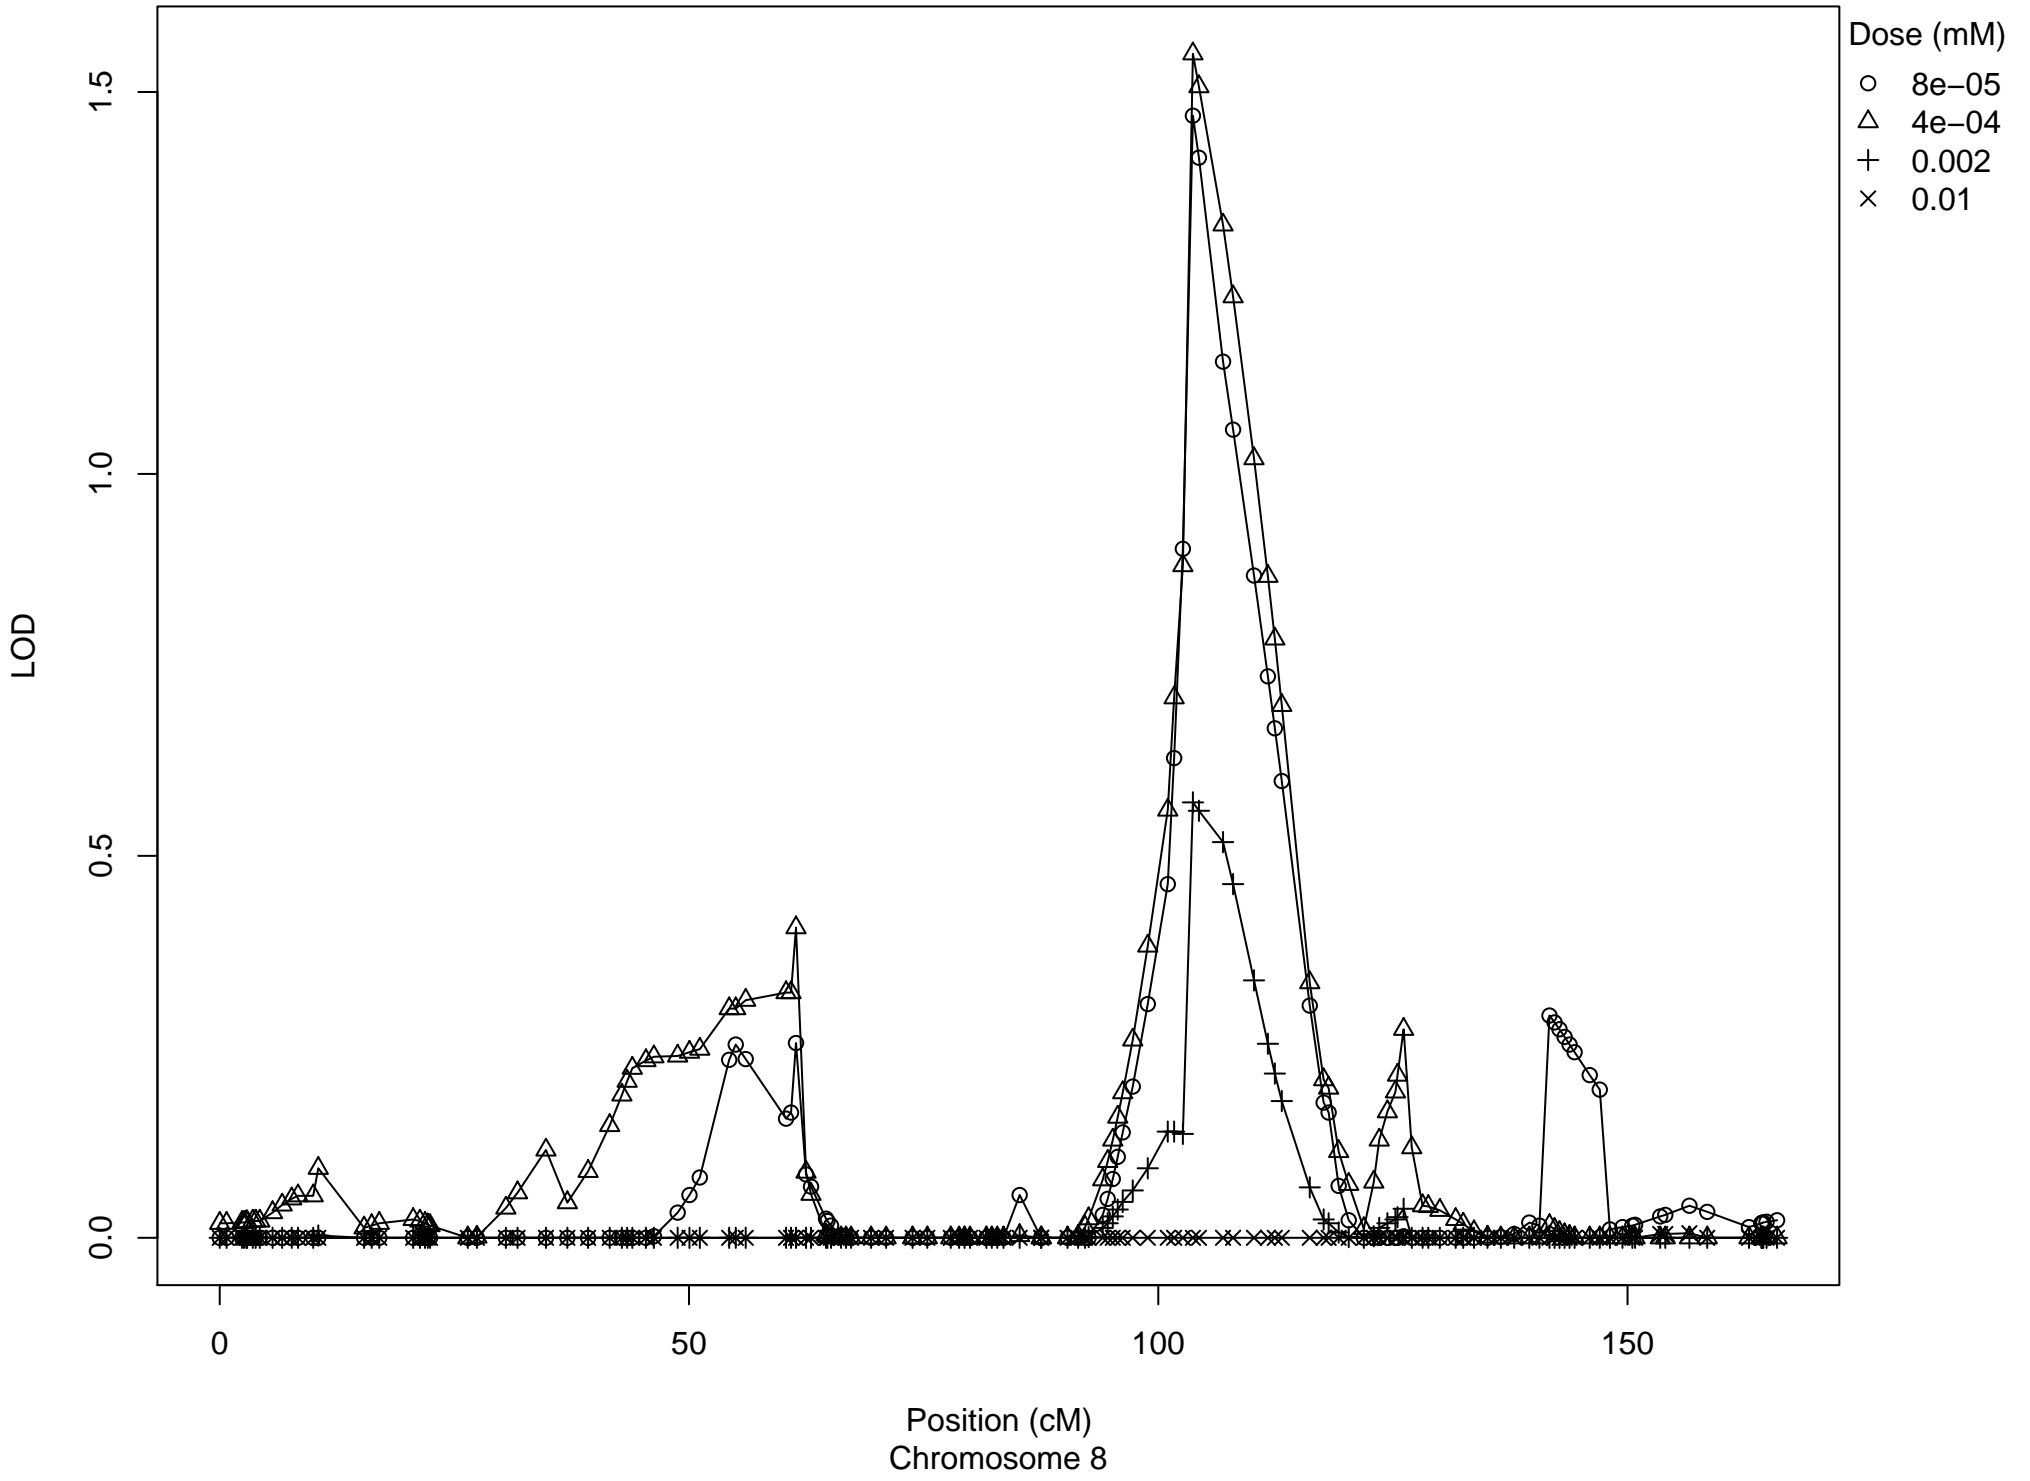

# Bleomycin sulfate (Bleo)

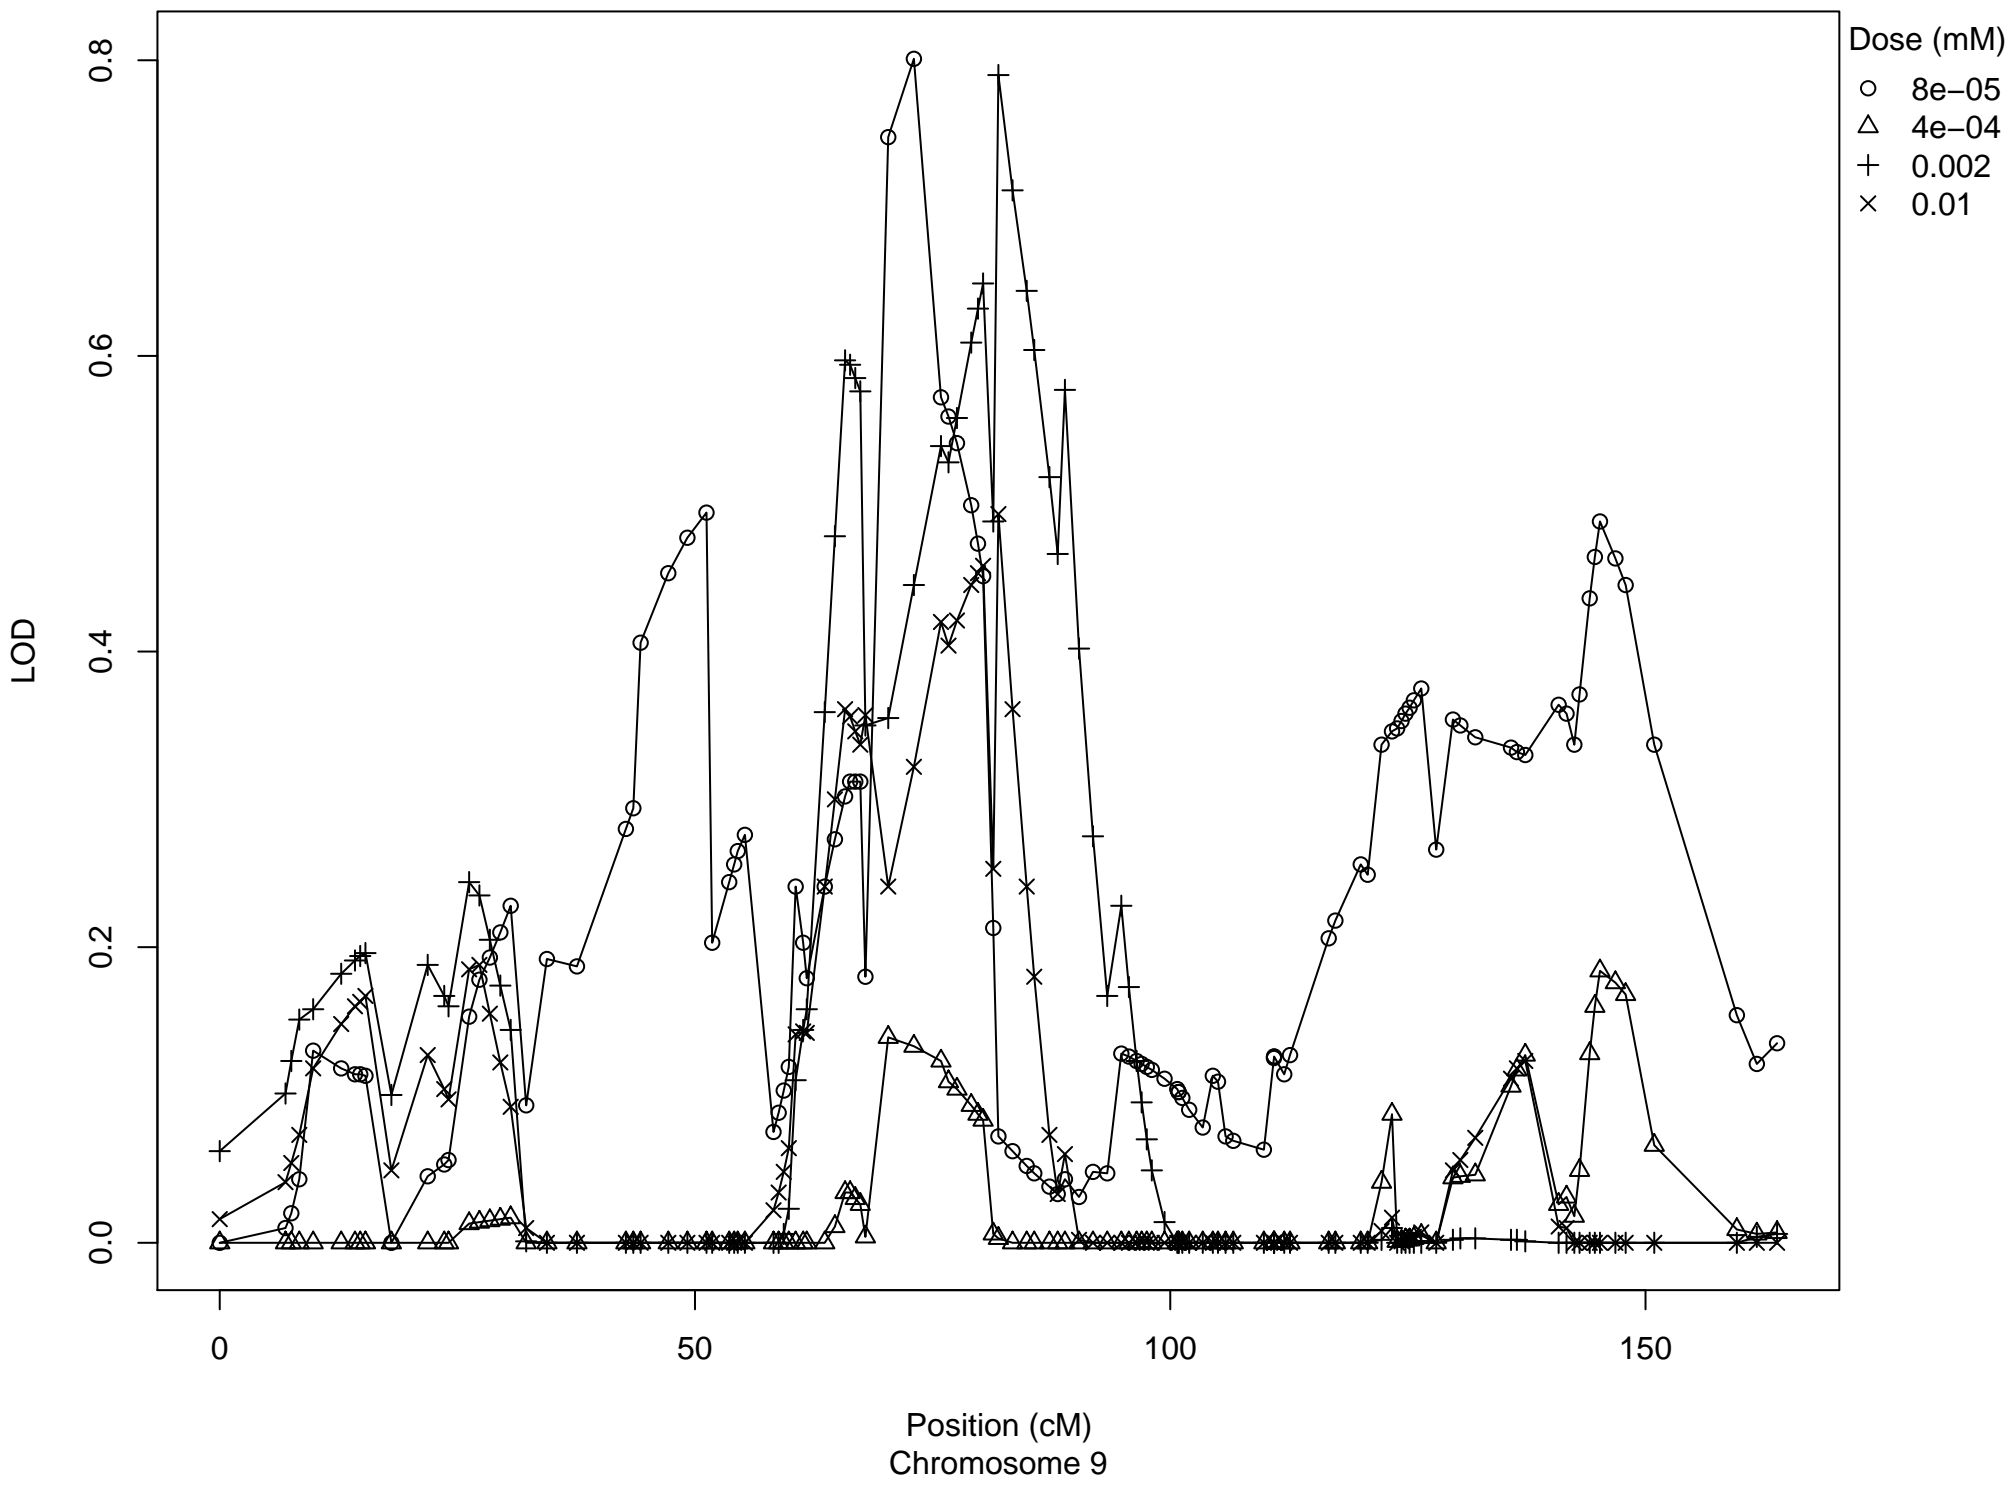

# Bleomycin sulfate (Bleo)

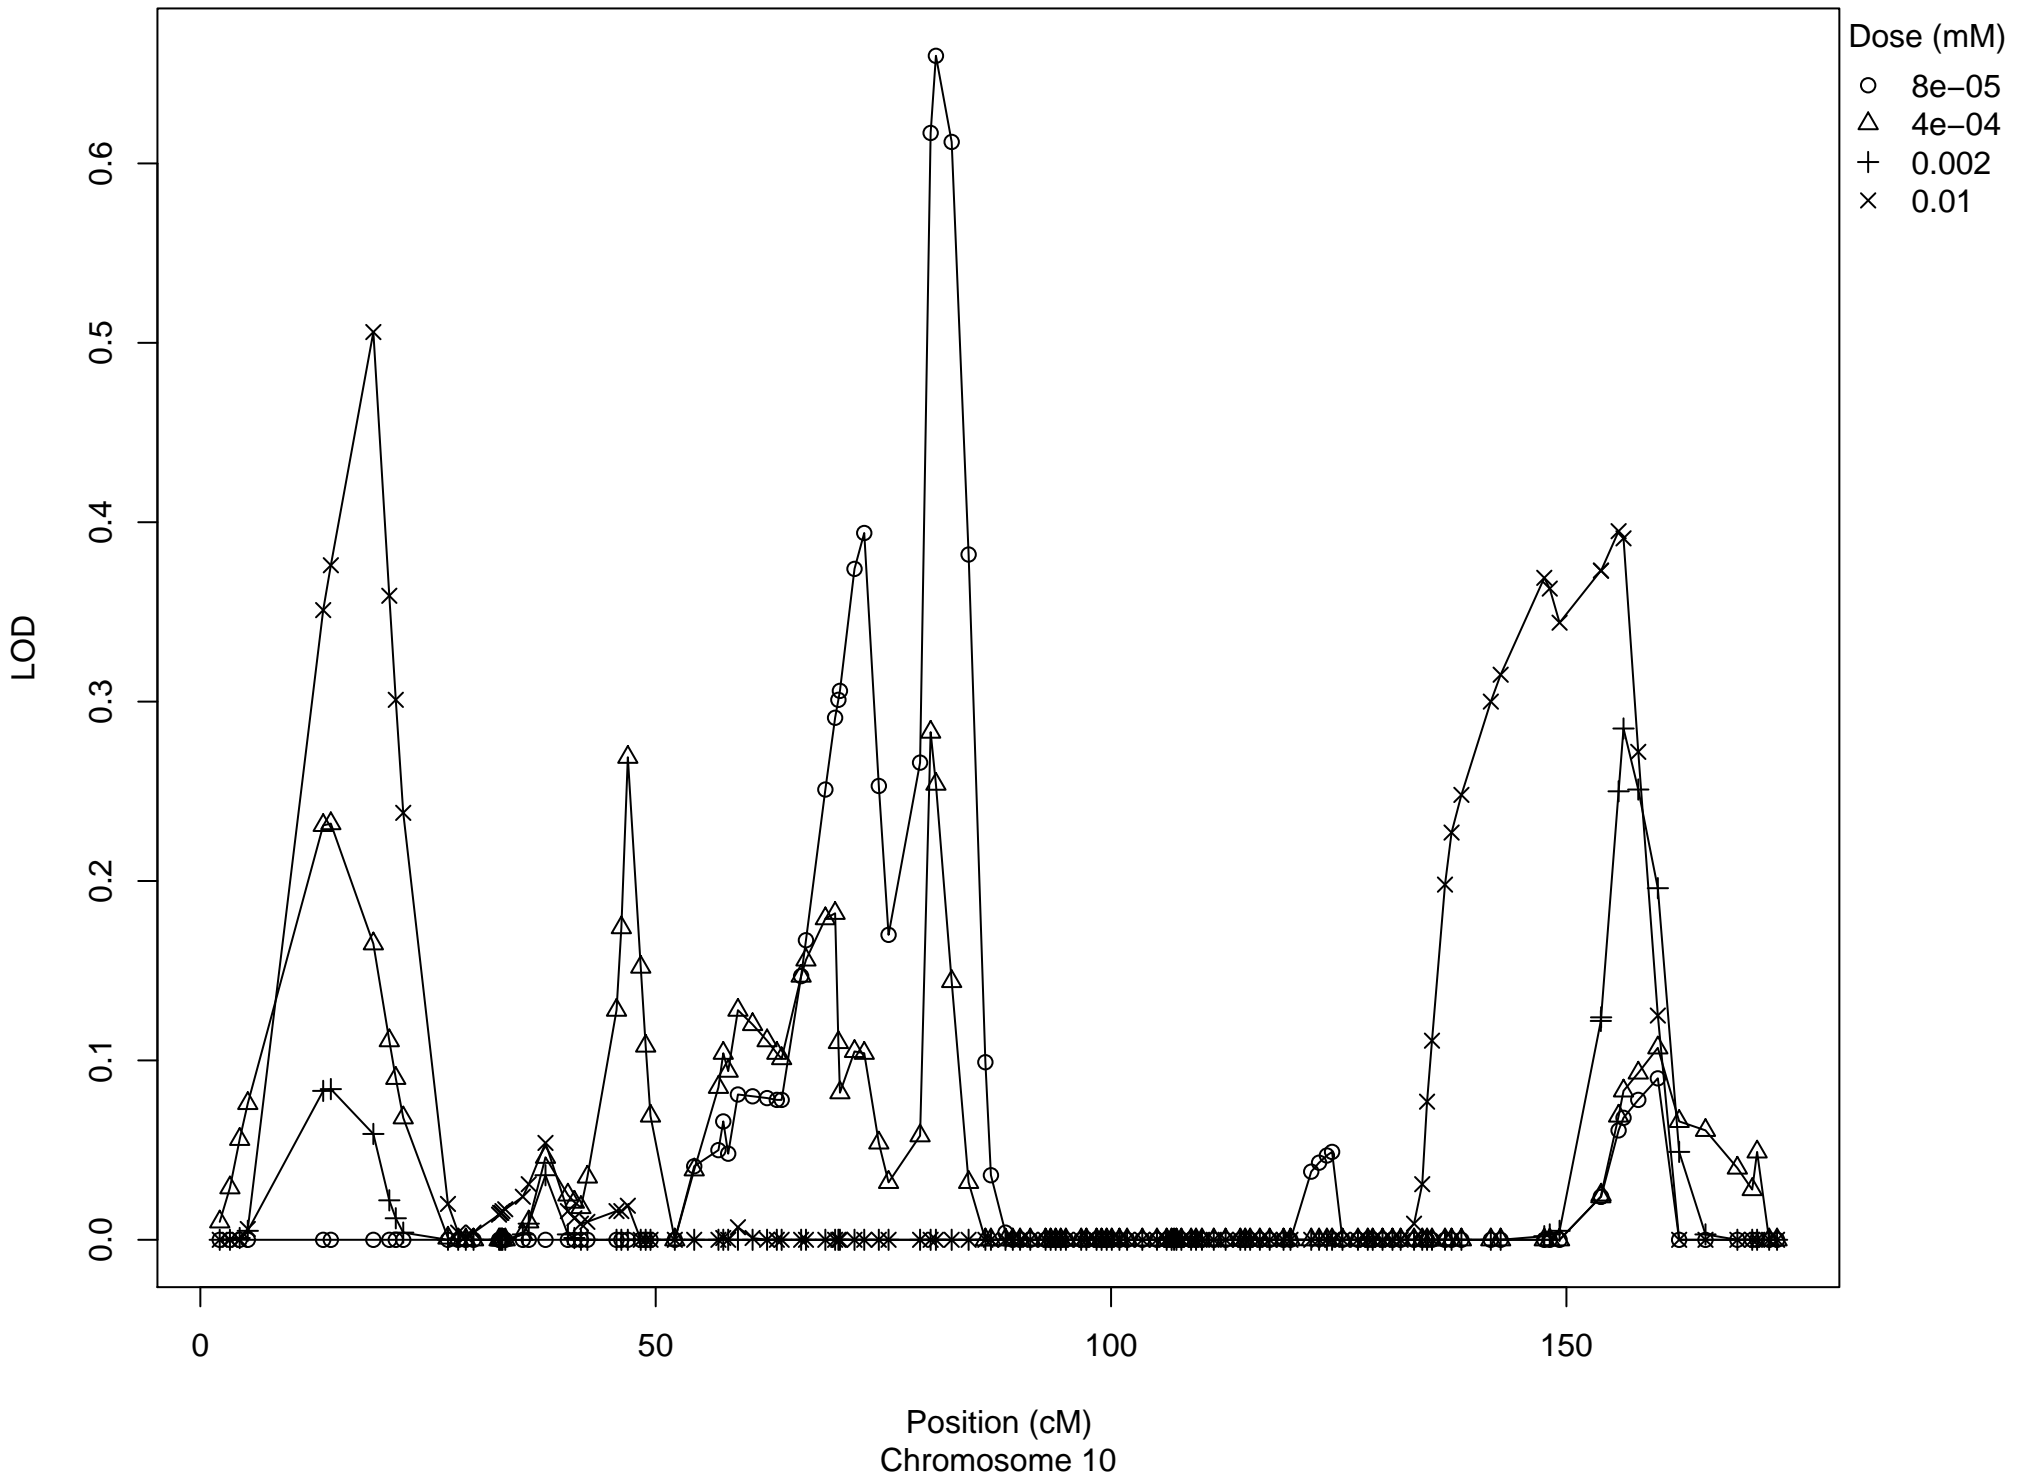

# Bleomycin sulfate (Bleo)

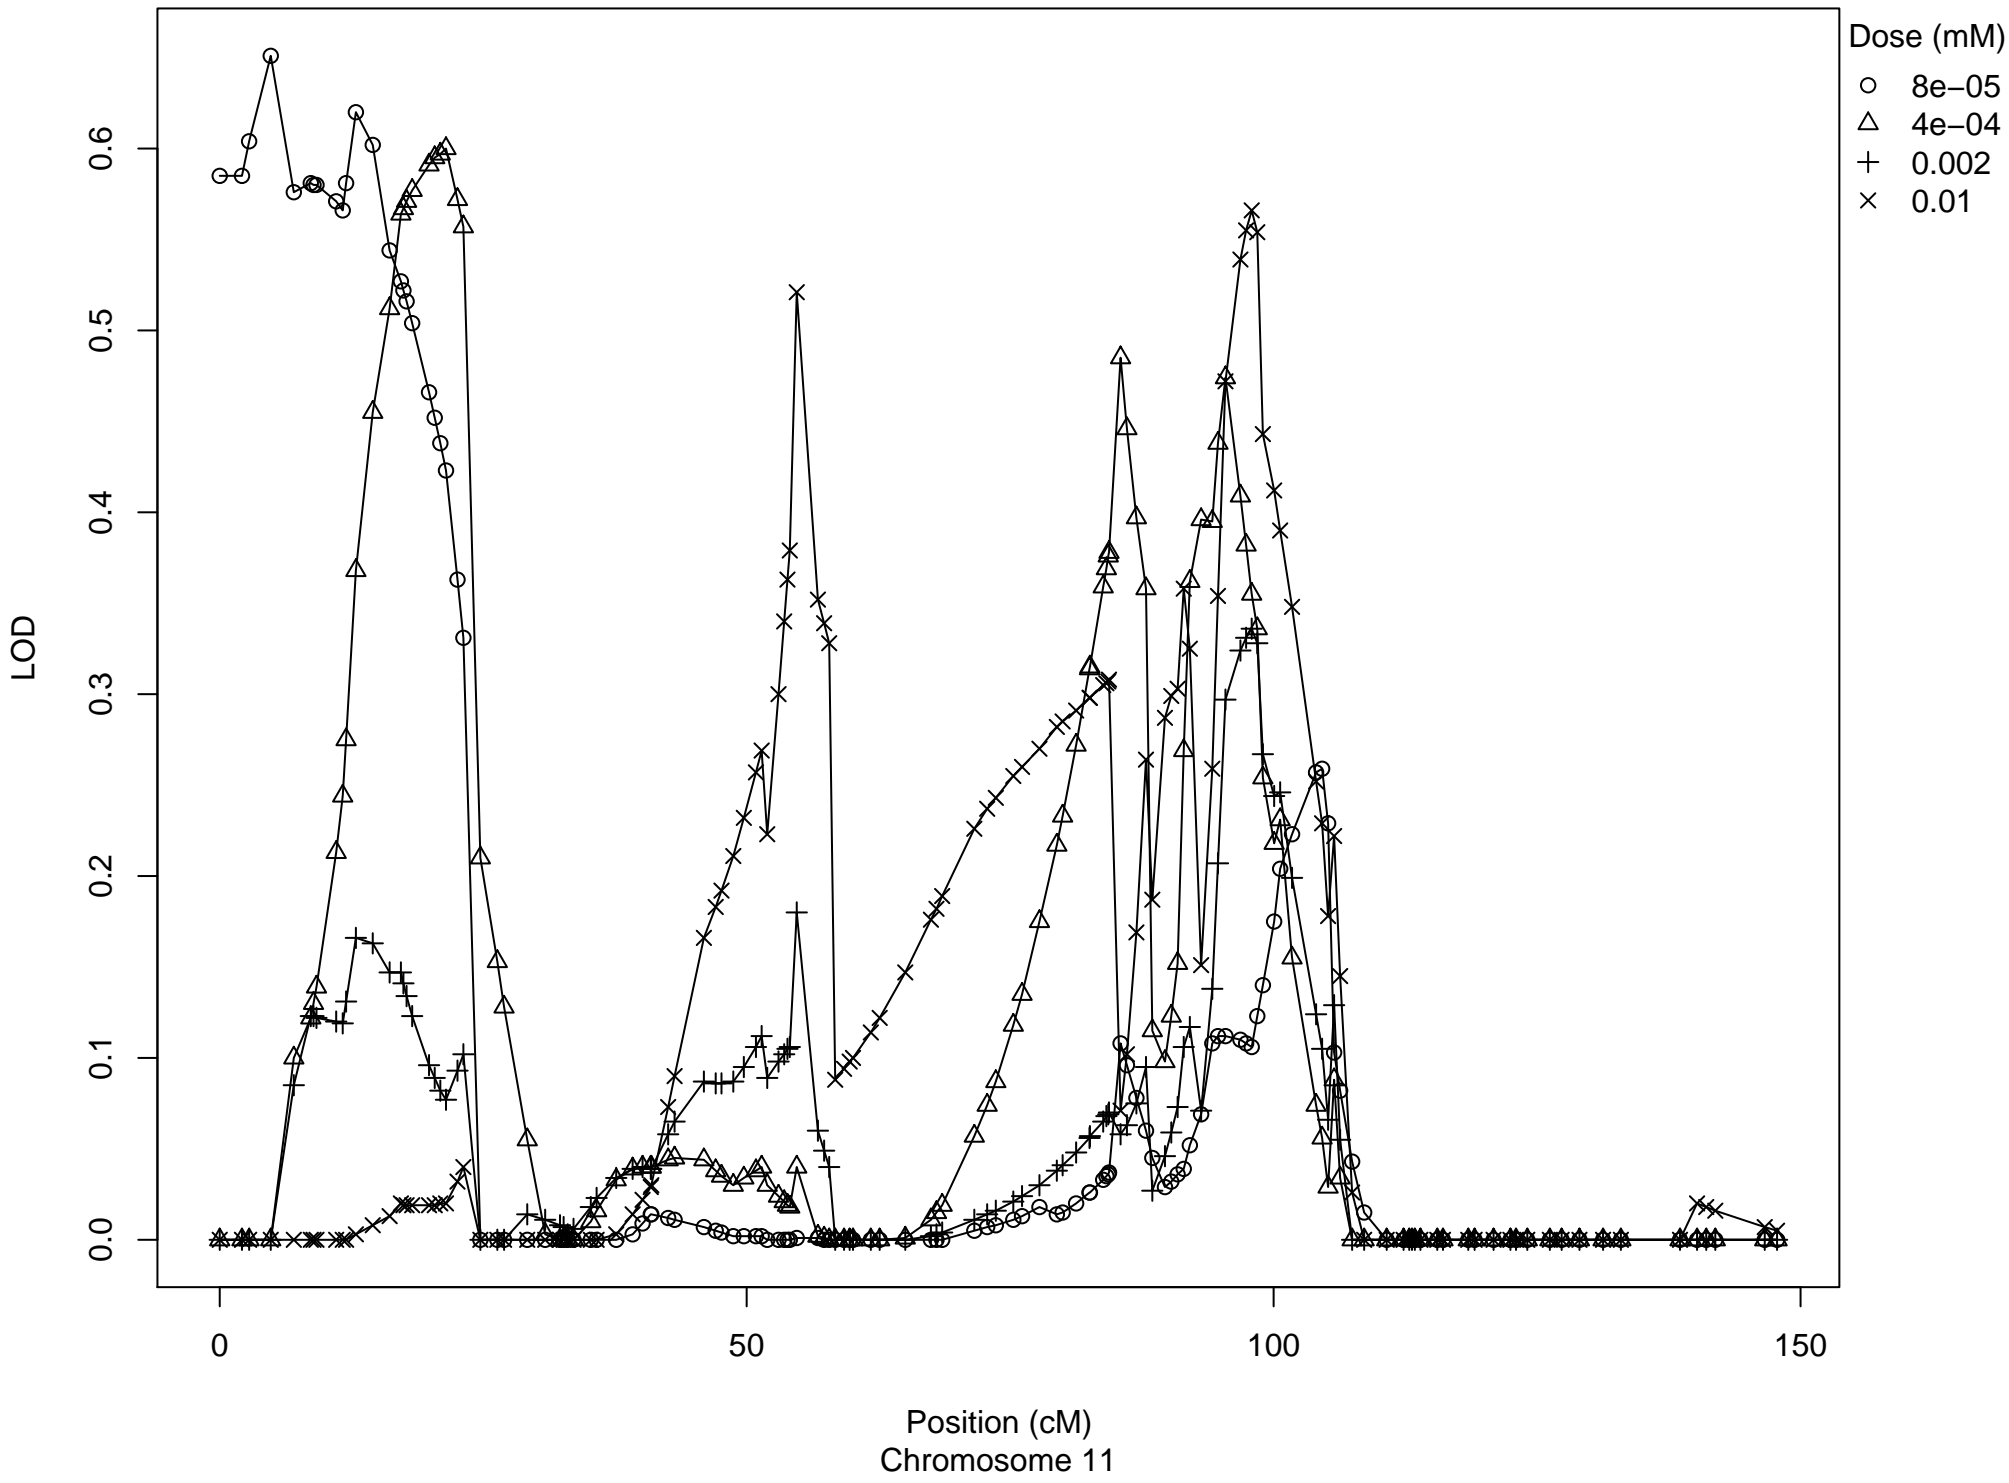

# Bleomycin sulfate (Bleo)

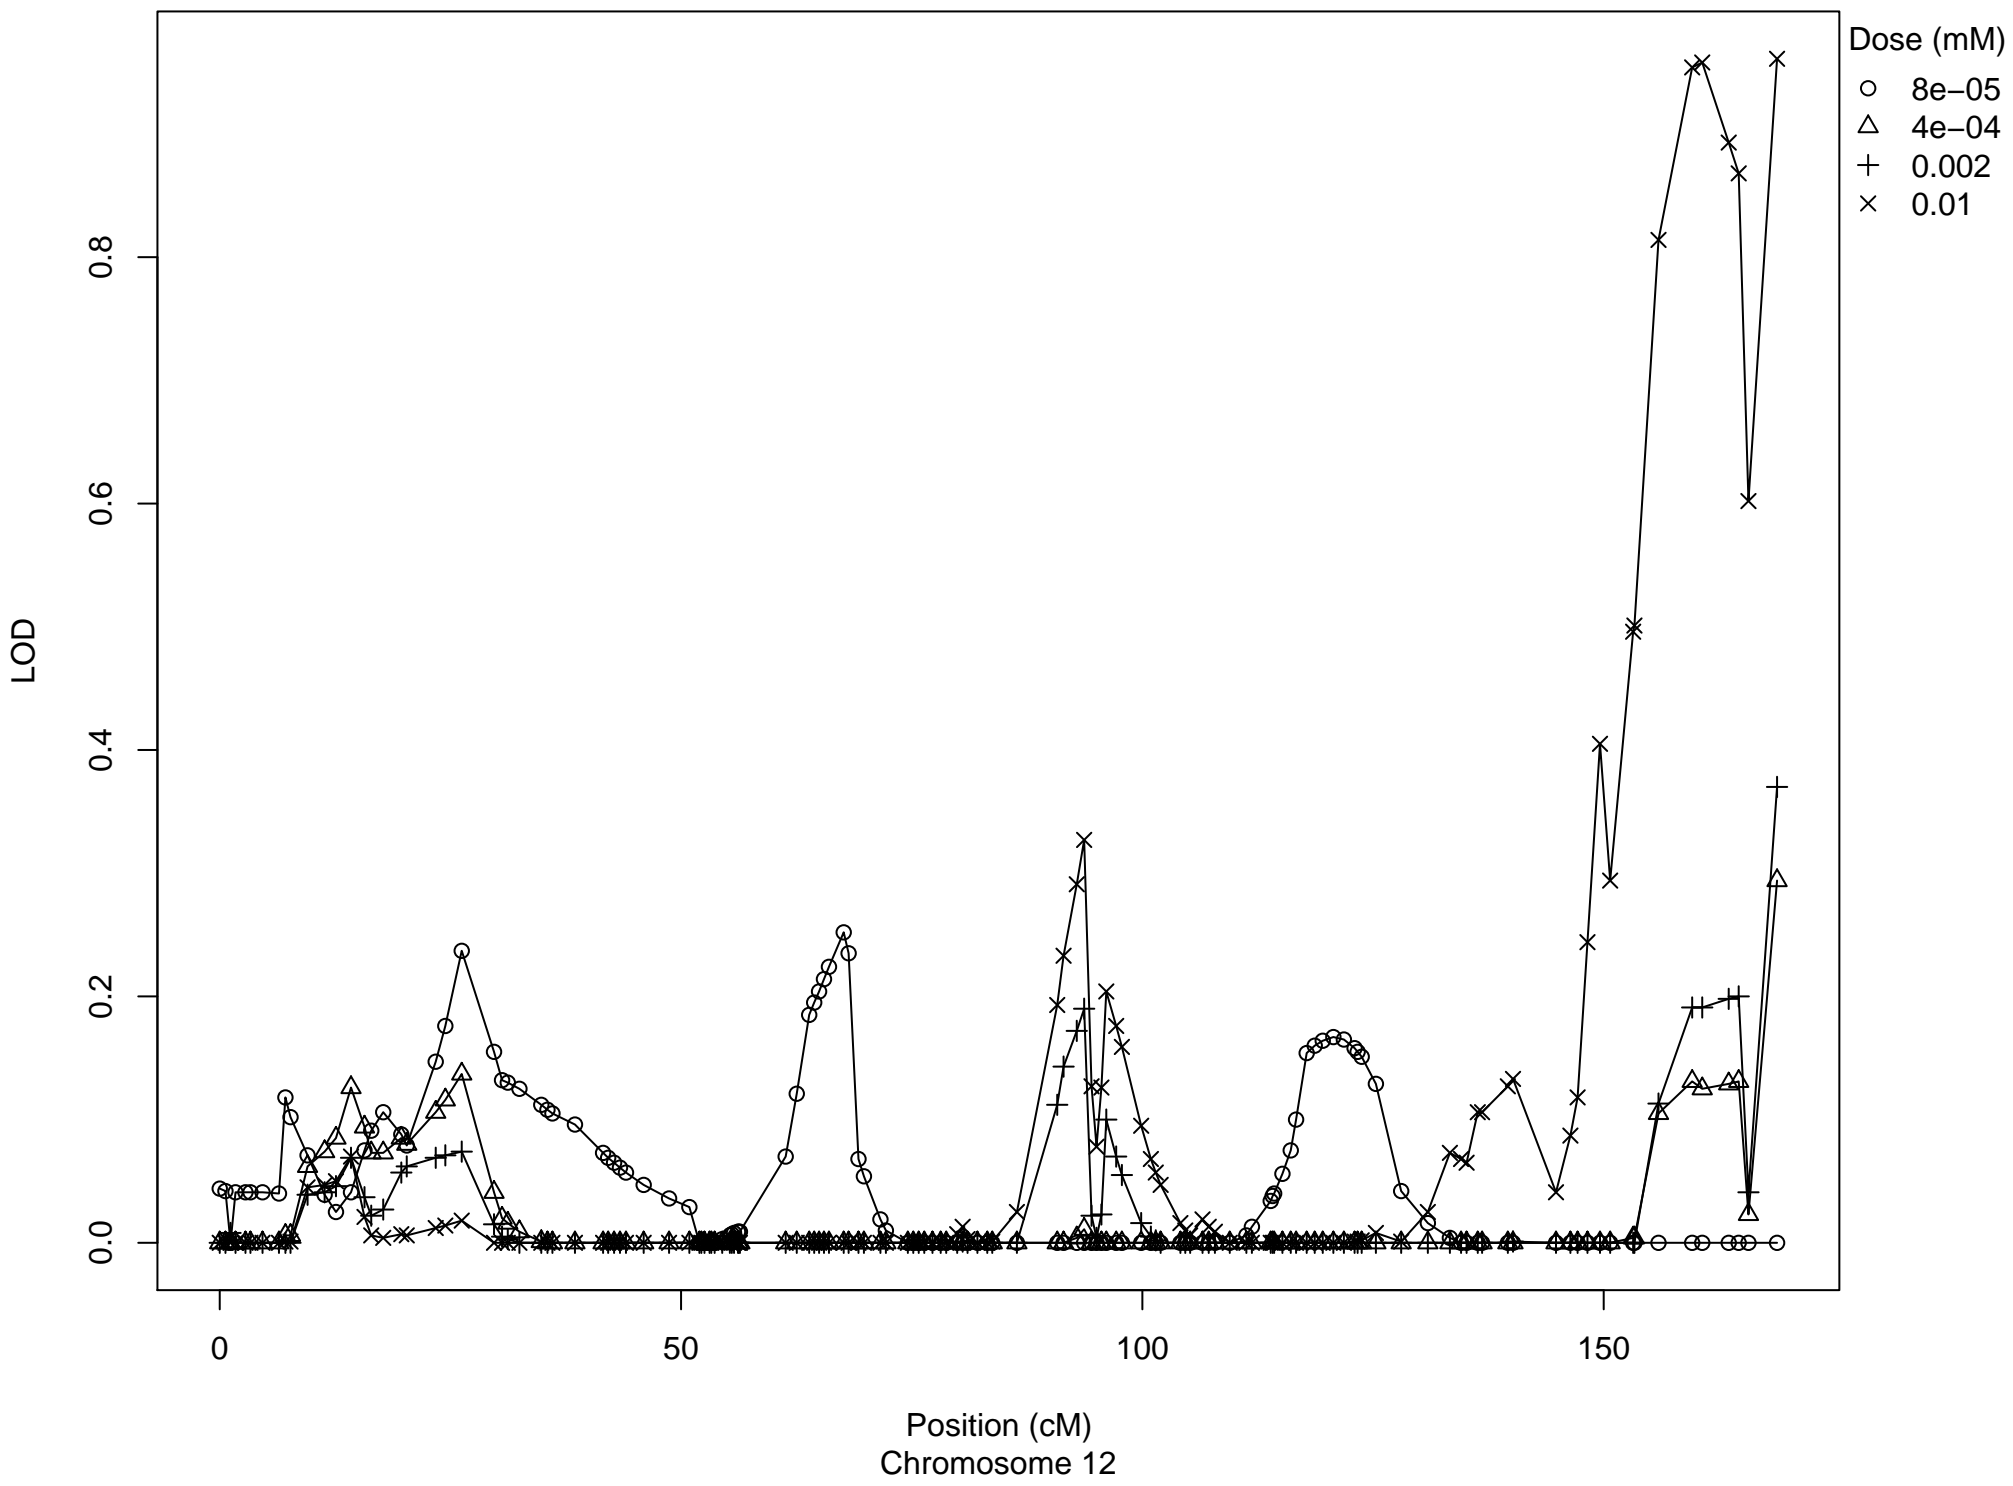



# Bleomycin sulfate (Bleo)

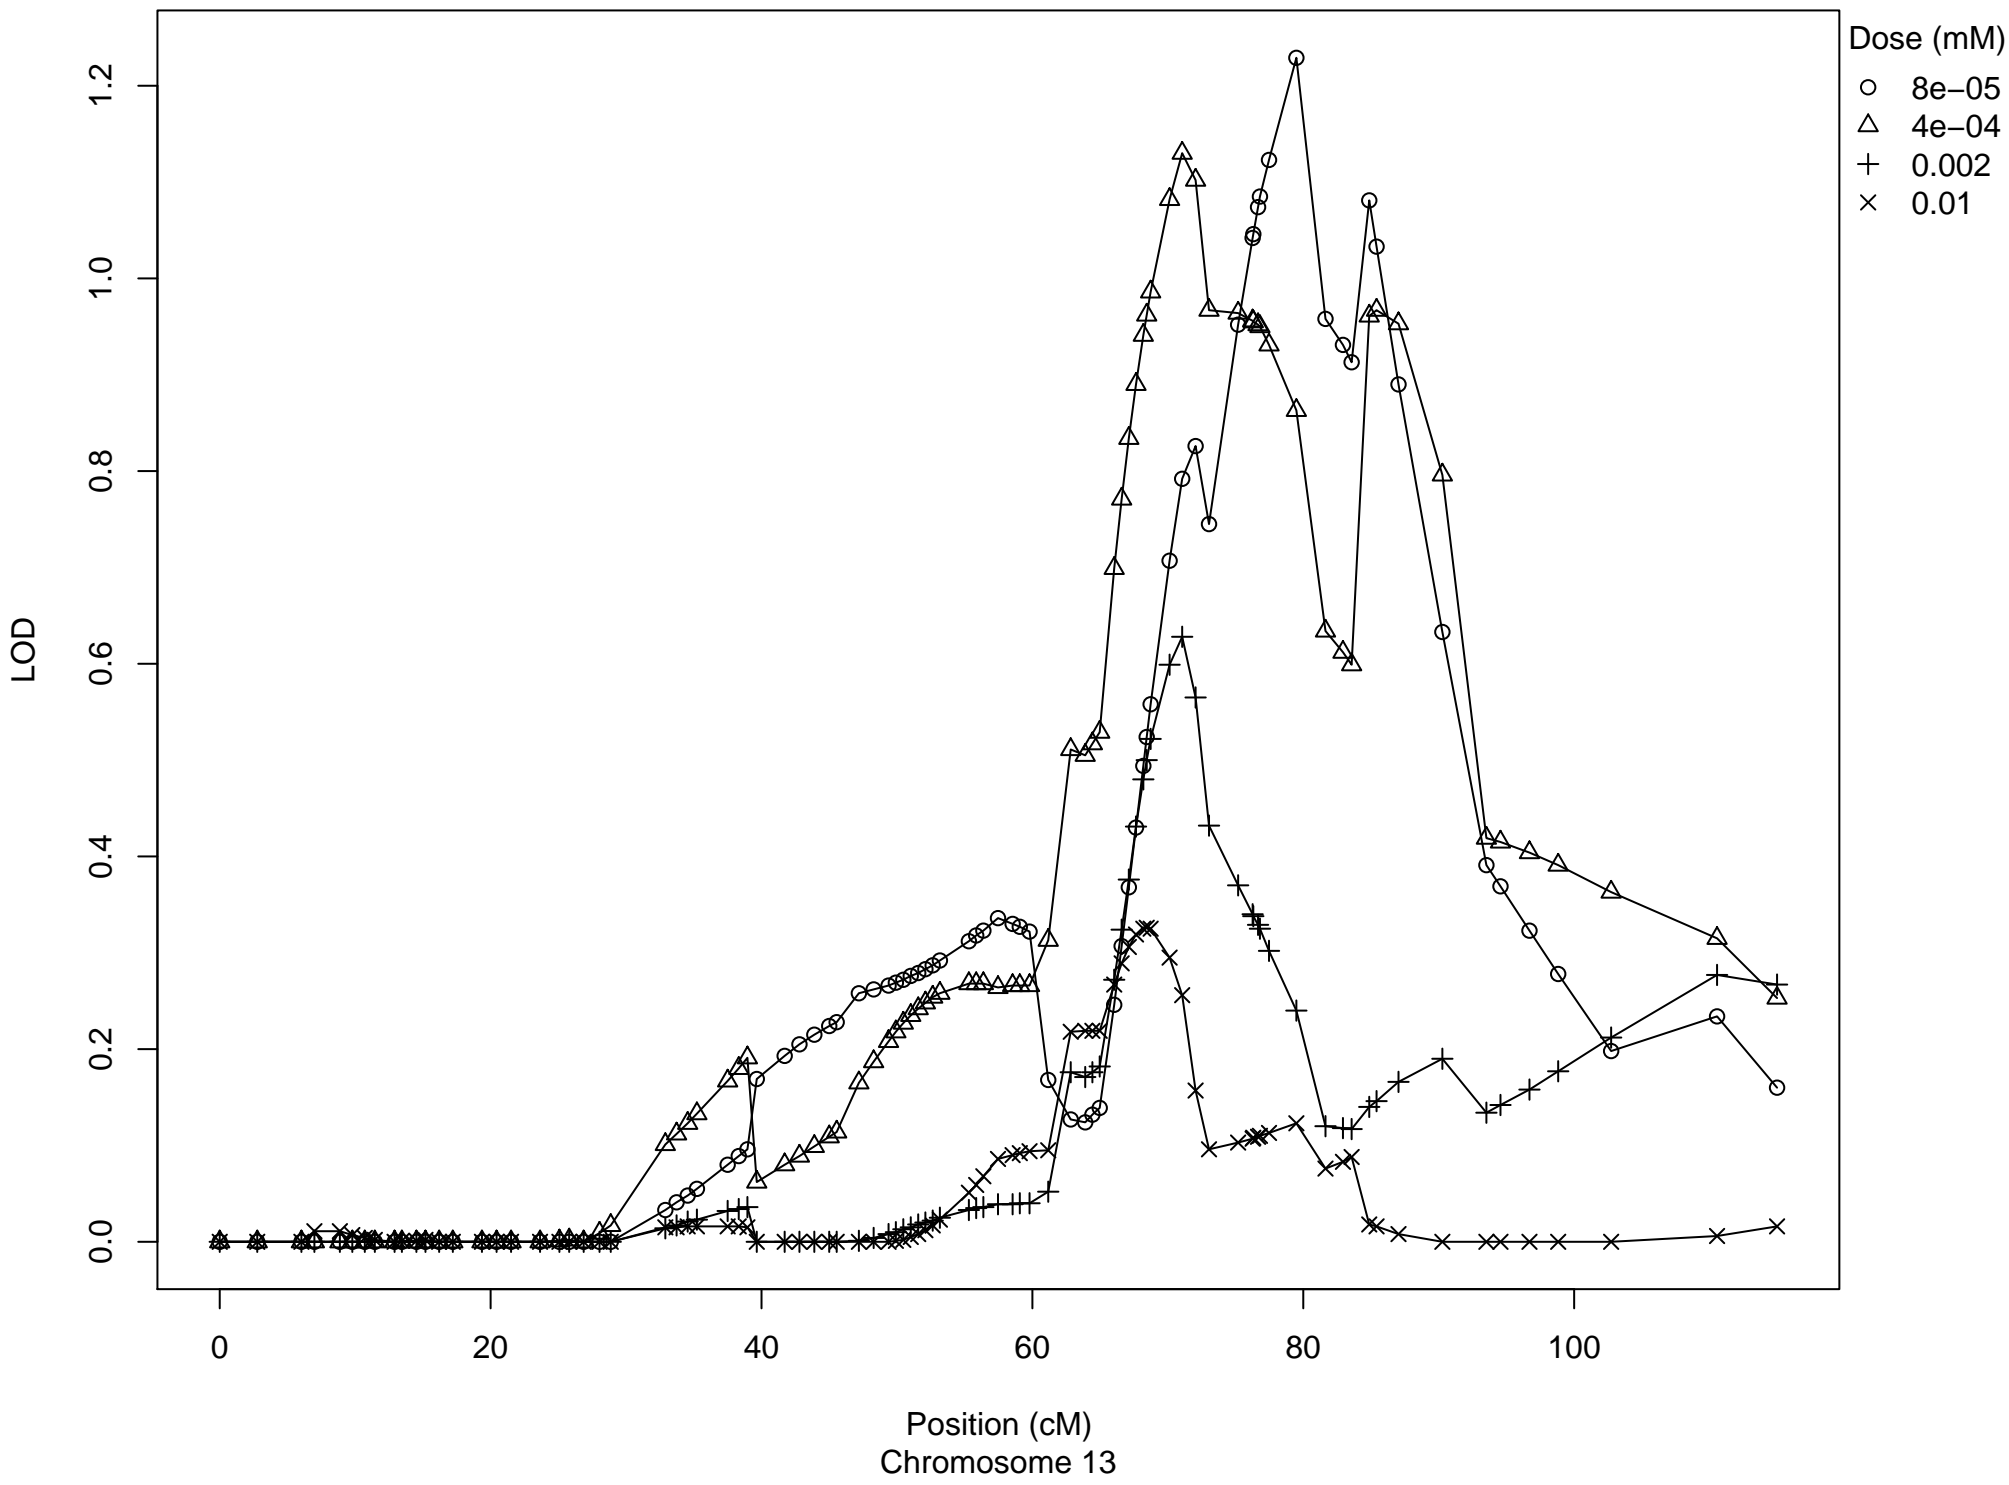

# Bleomycin sulfate (Bleo)

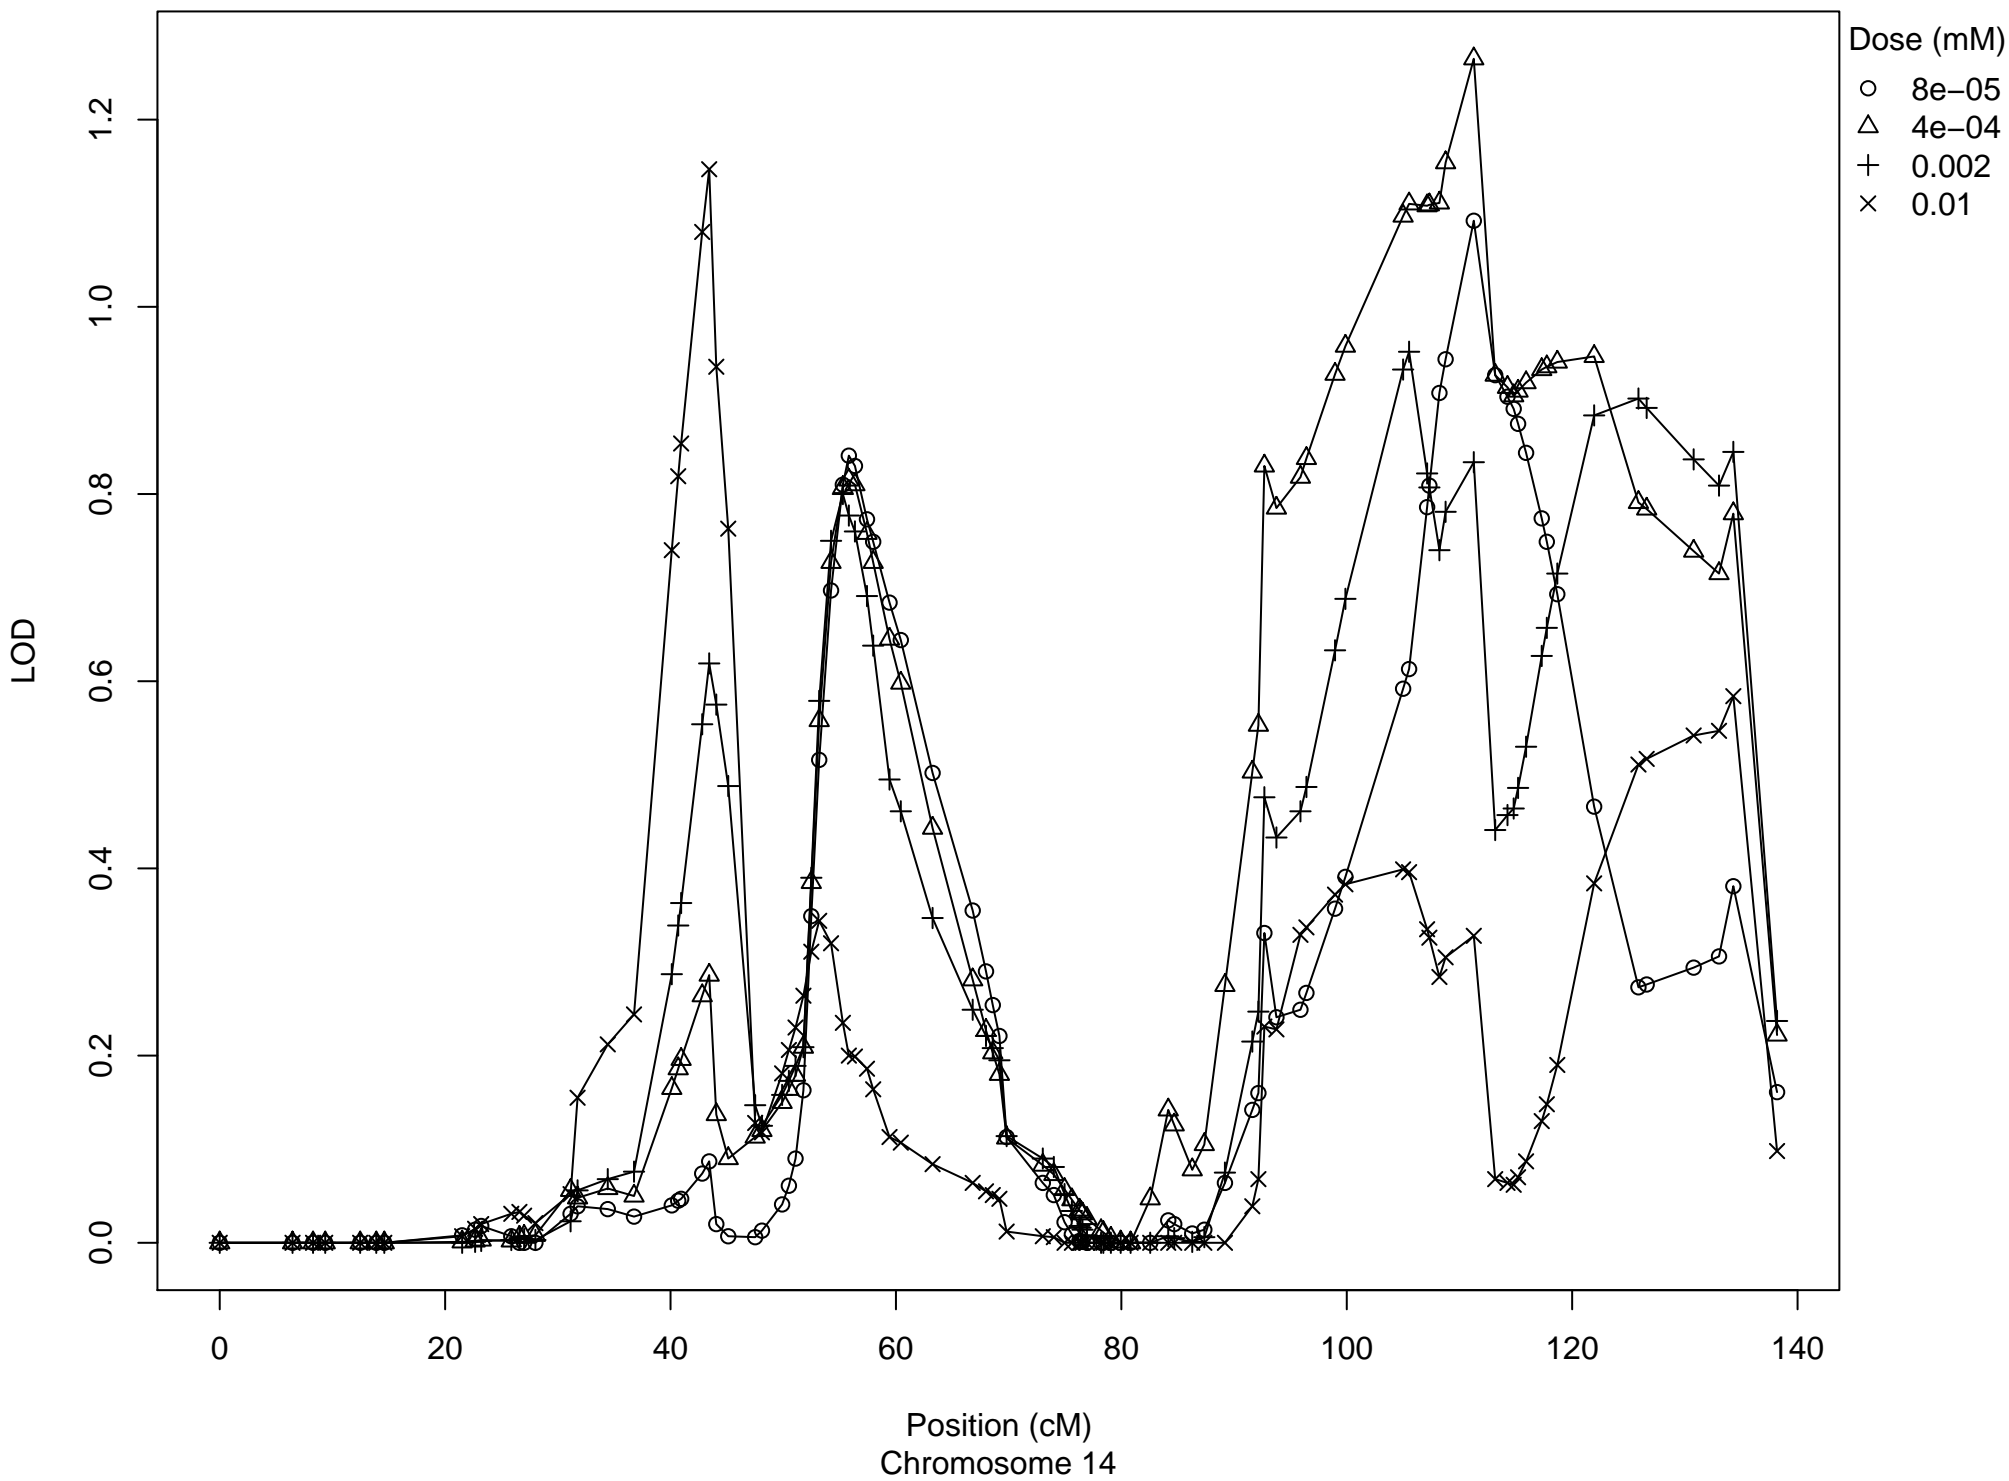

# Bleomycin sulfate (Bleo)

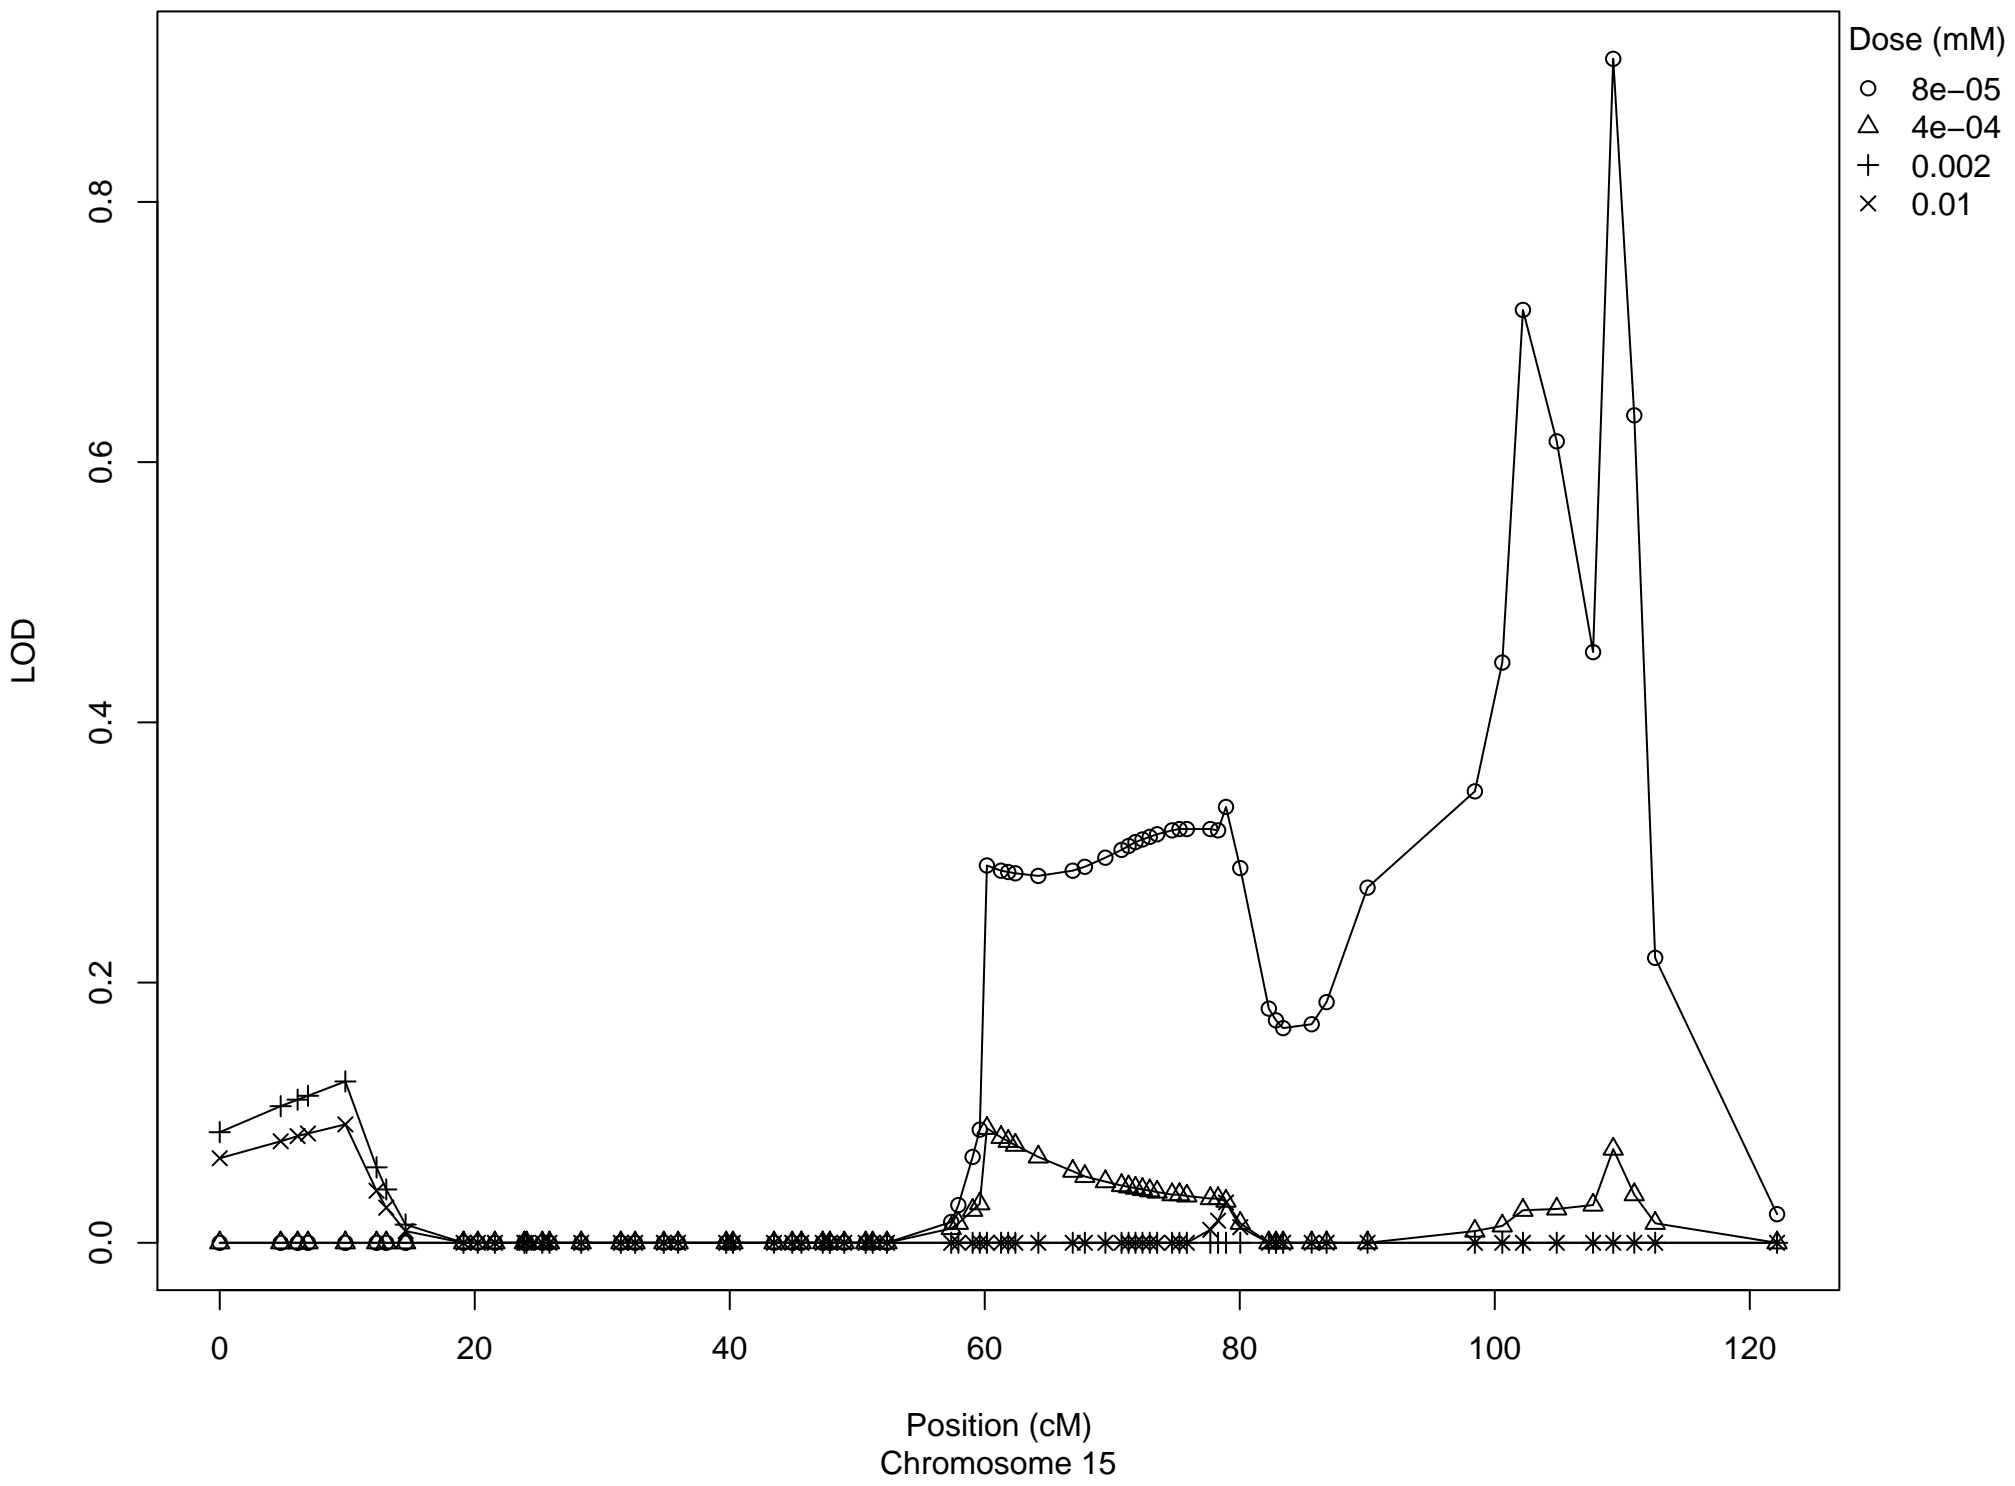

# Bleomycin sulfate (Bleo)

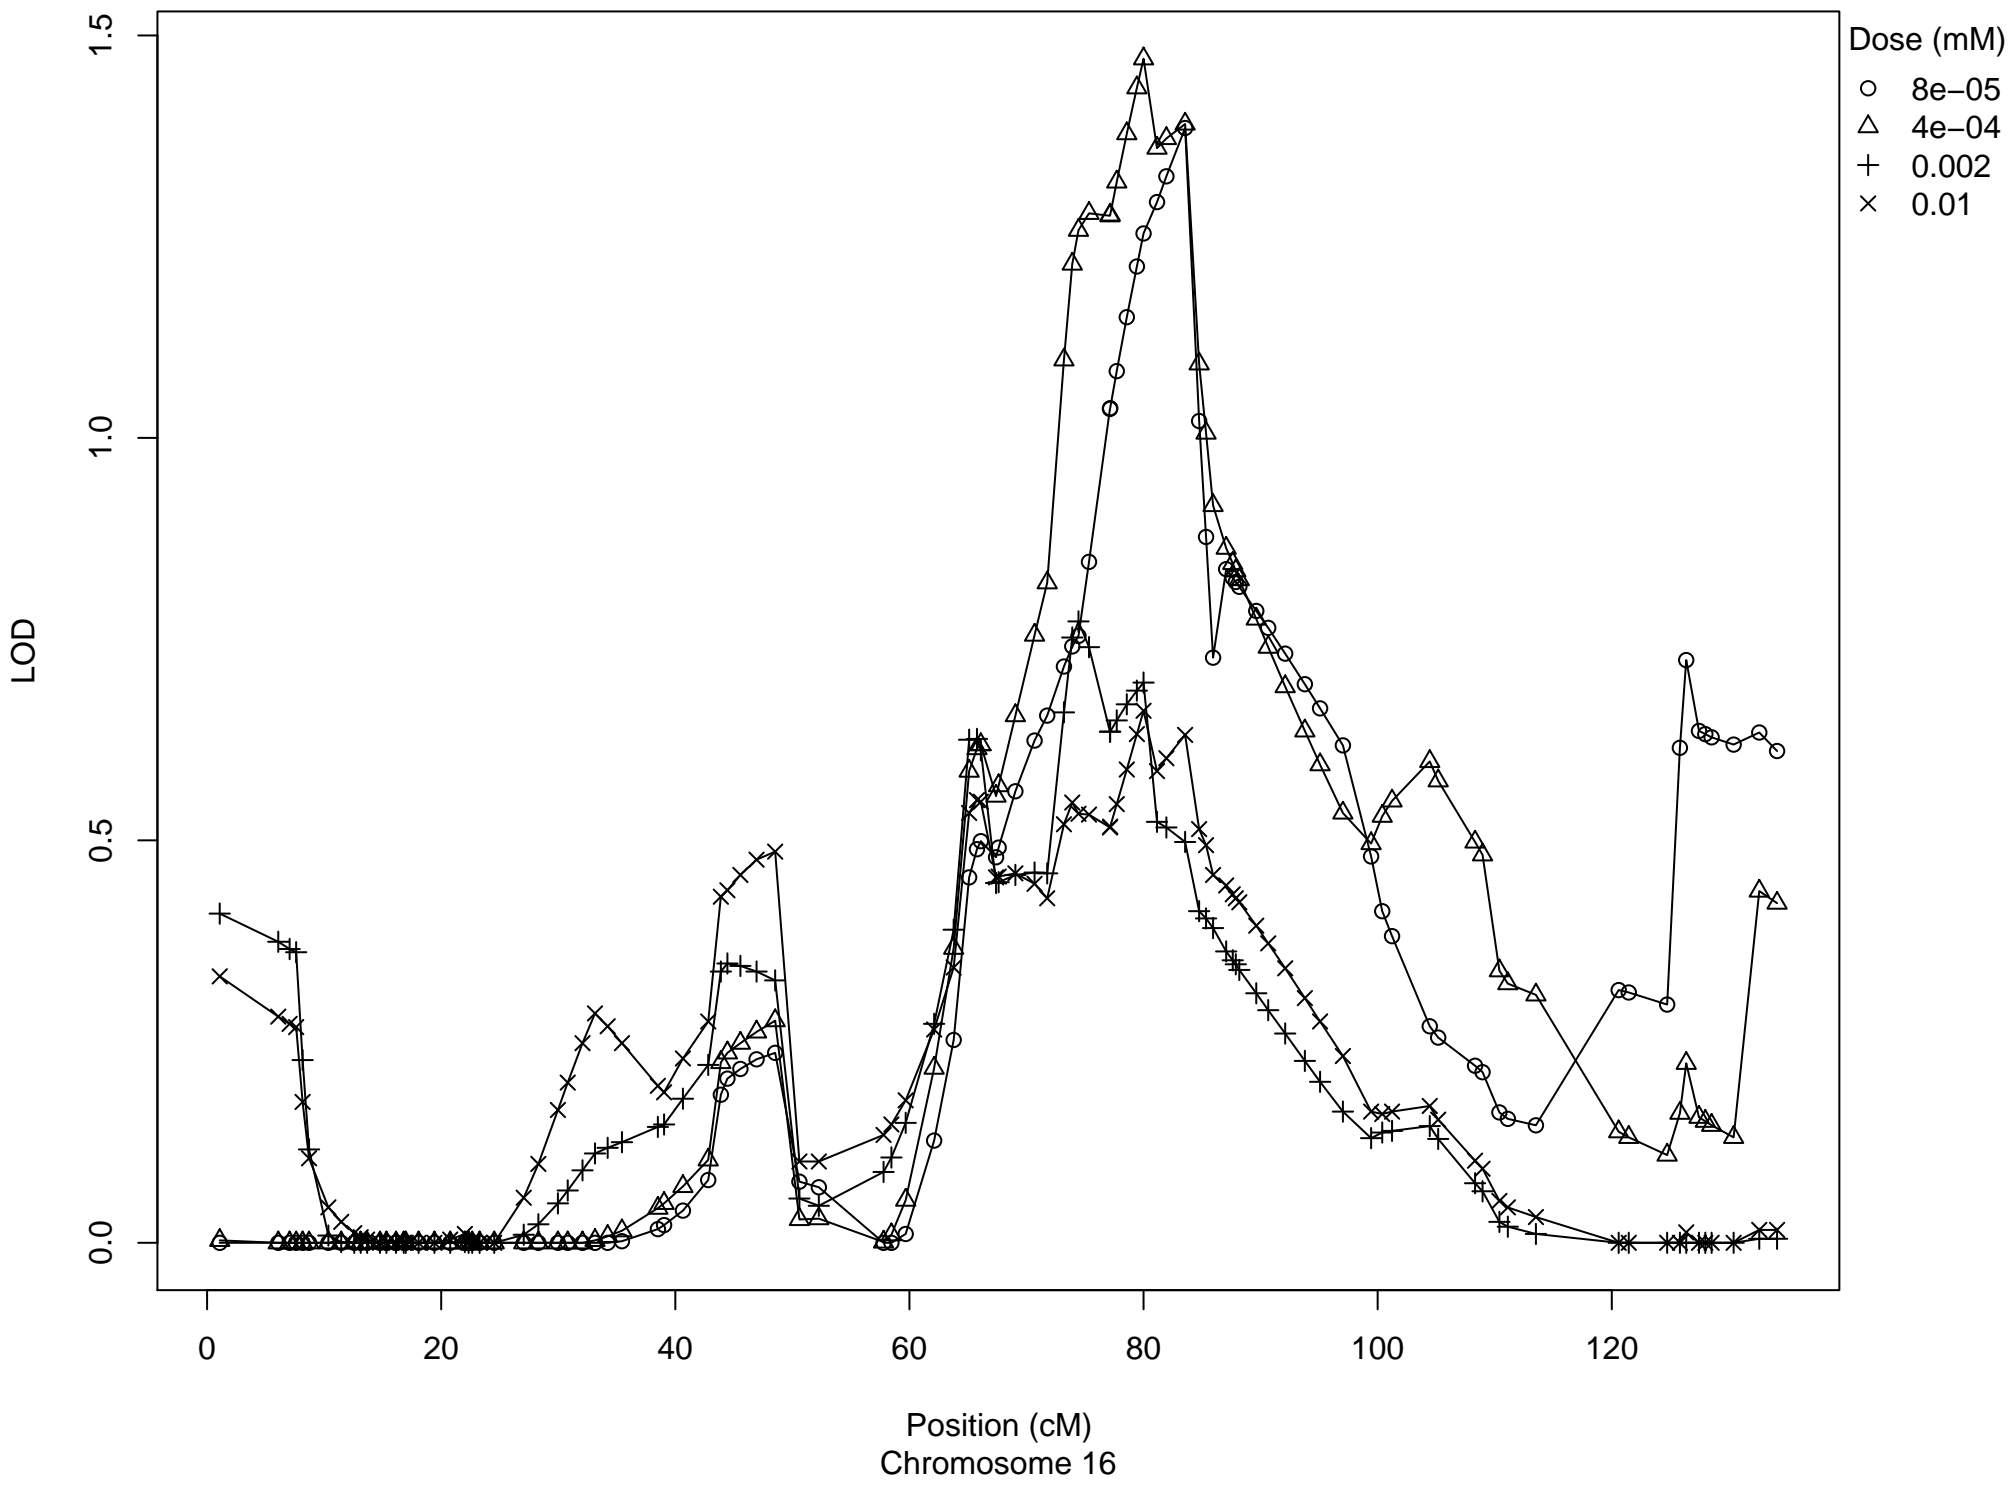

# Bleomycin sulfate (Bleo)

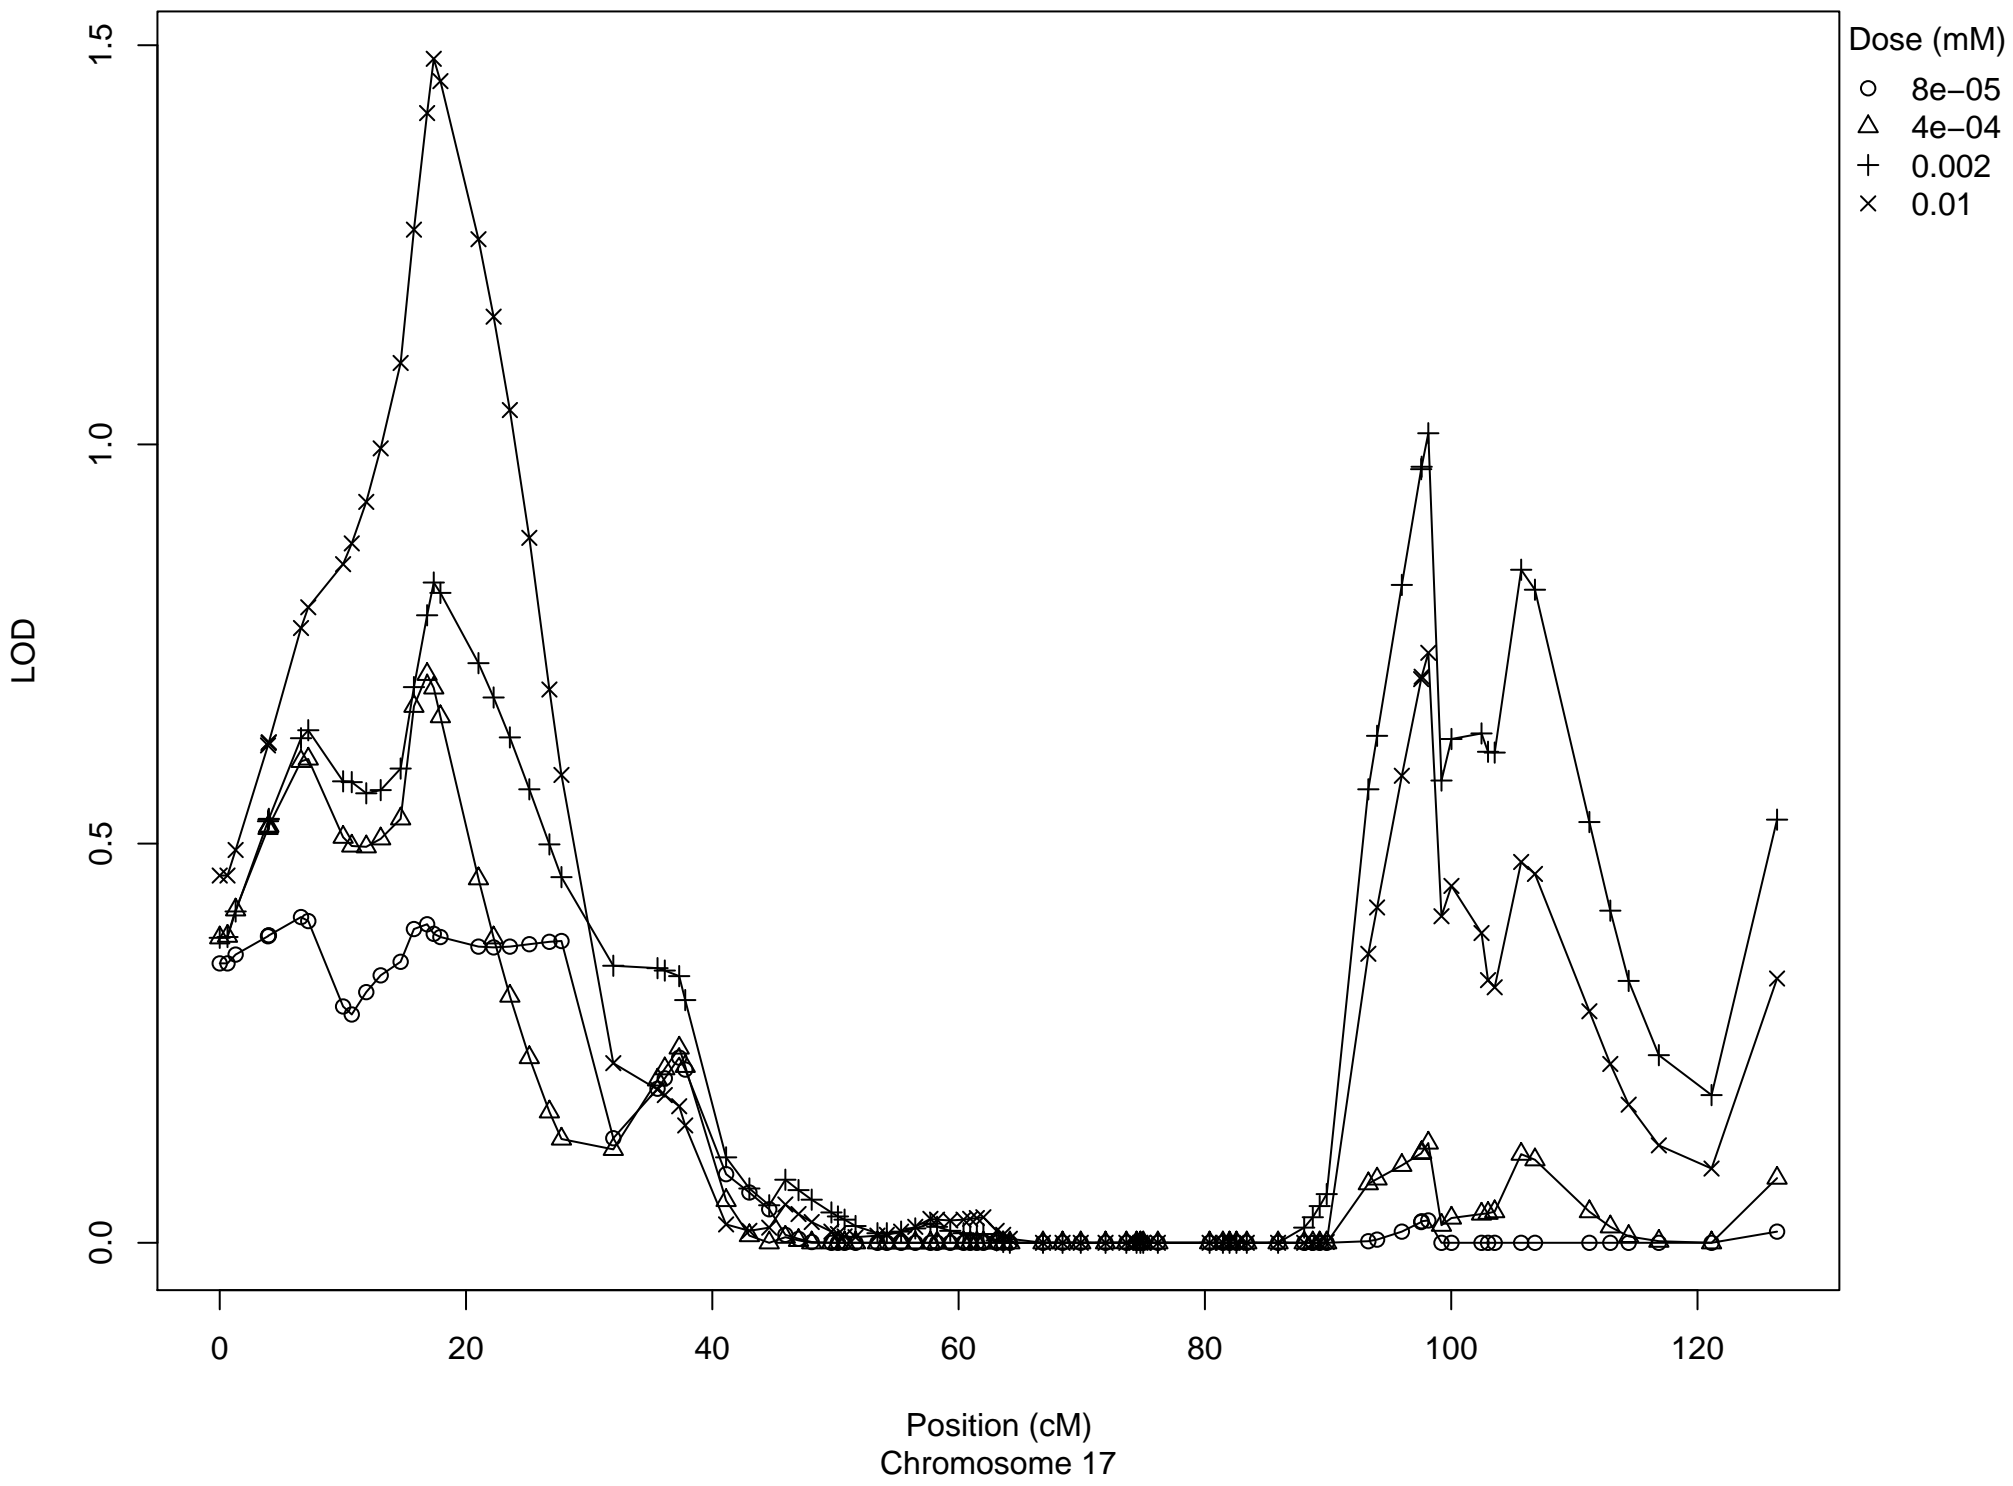

# Bleomycin sulfate (Bleo)

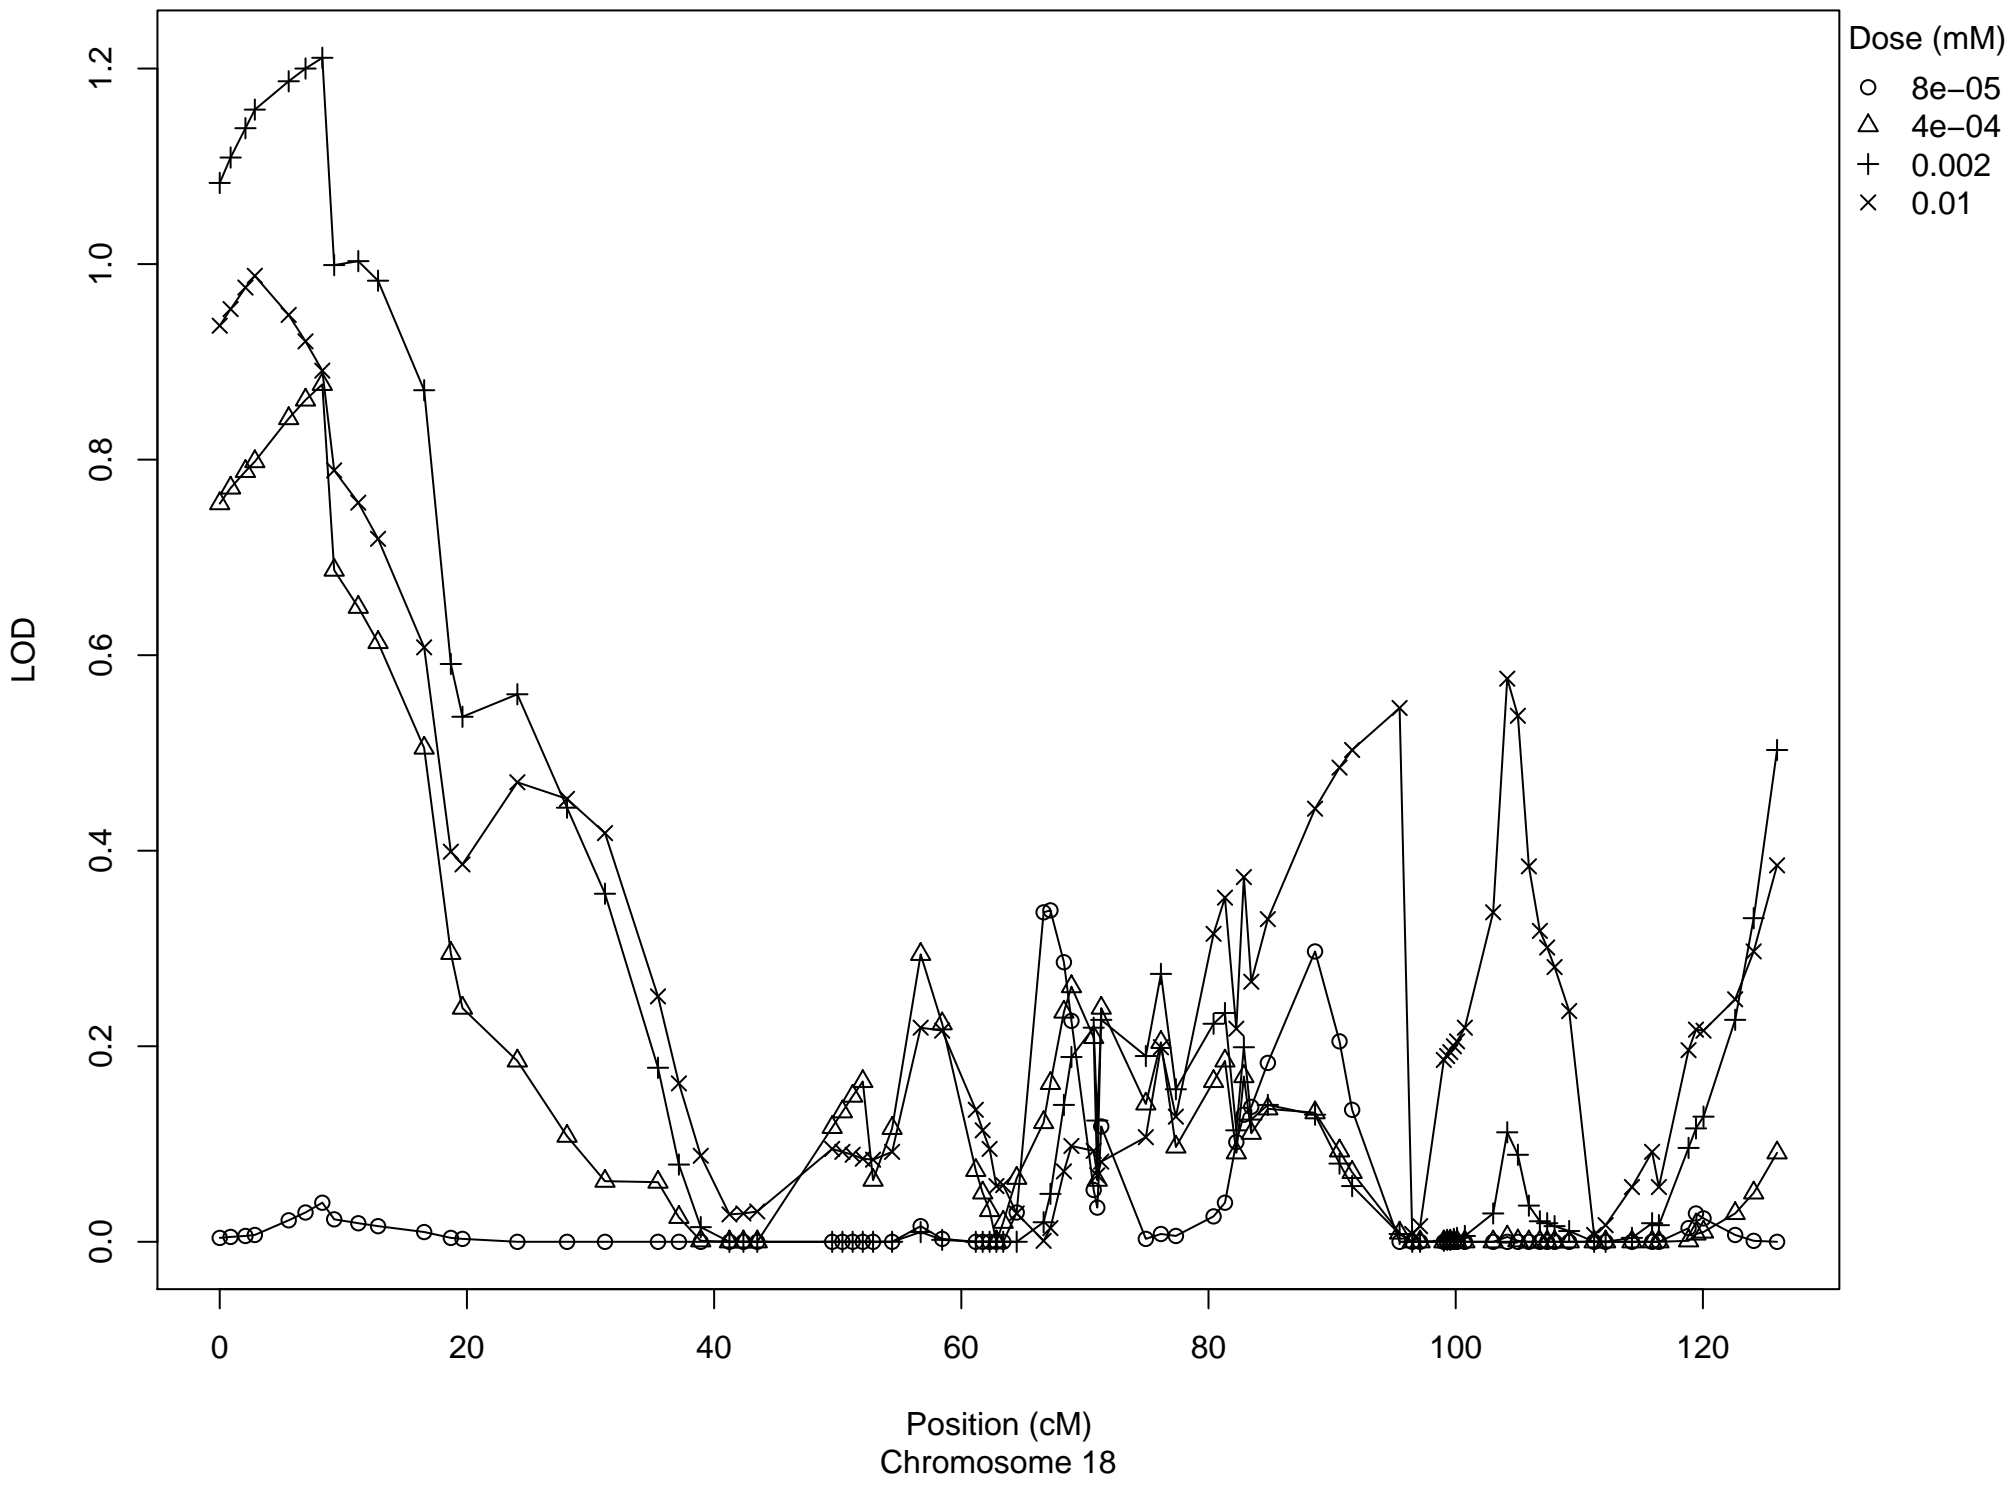

# Bleomycin sulfate (Bleo)

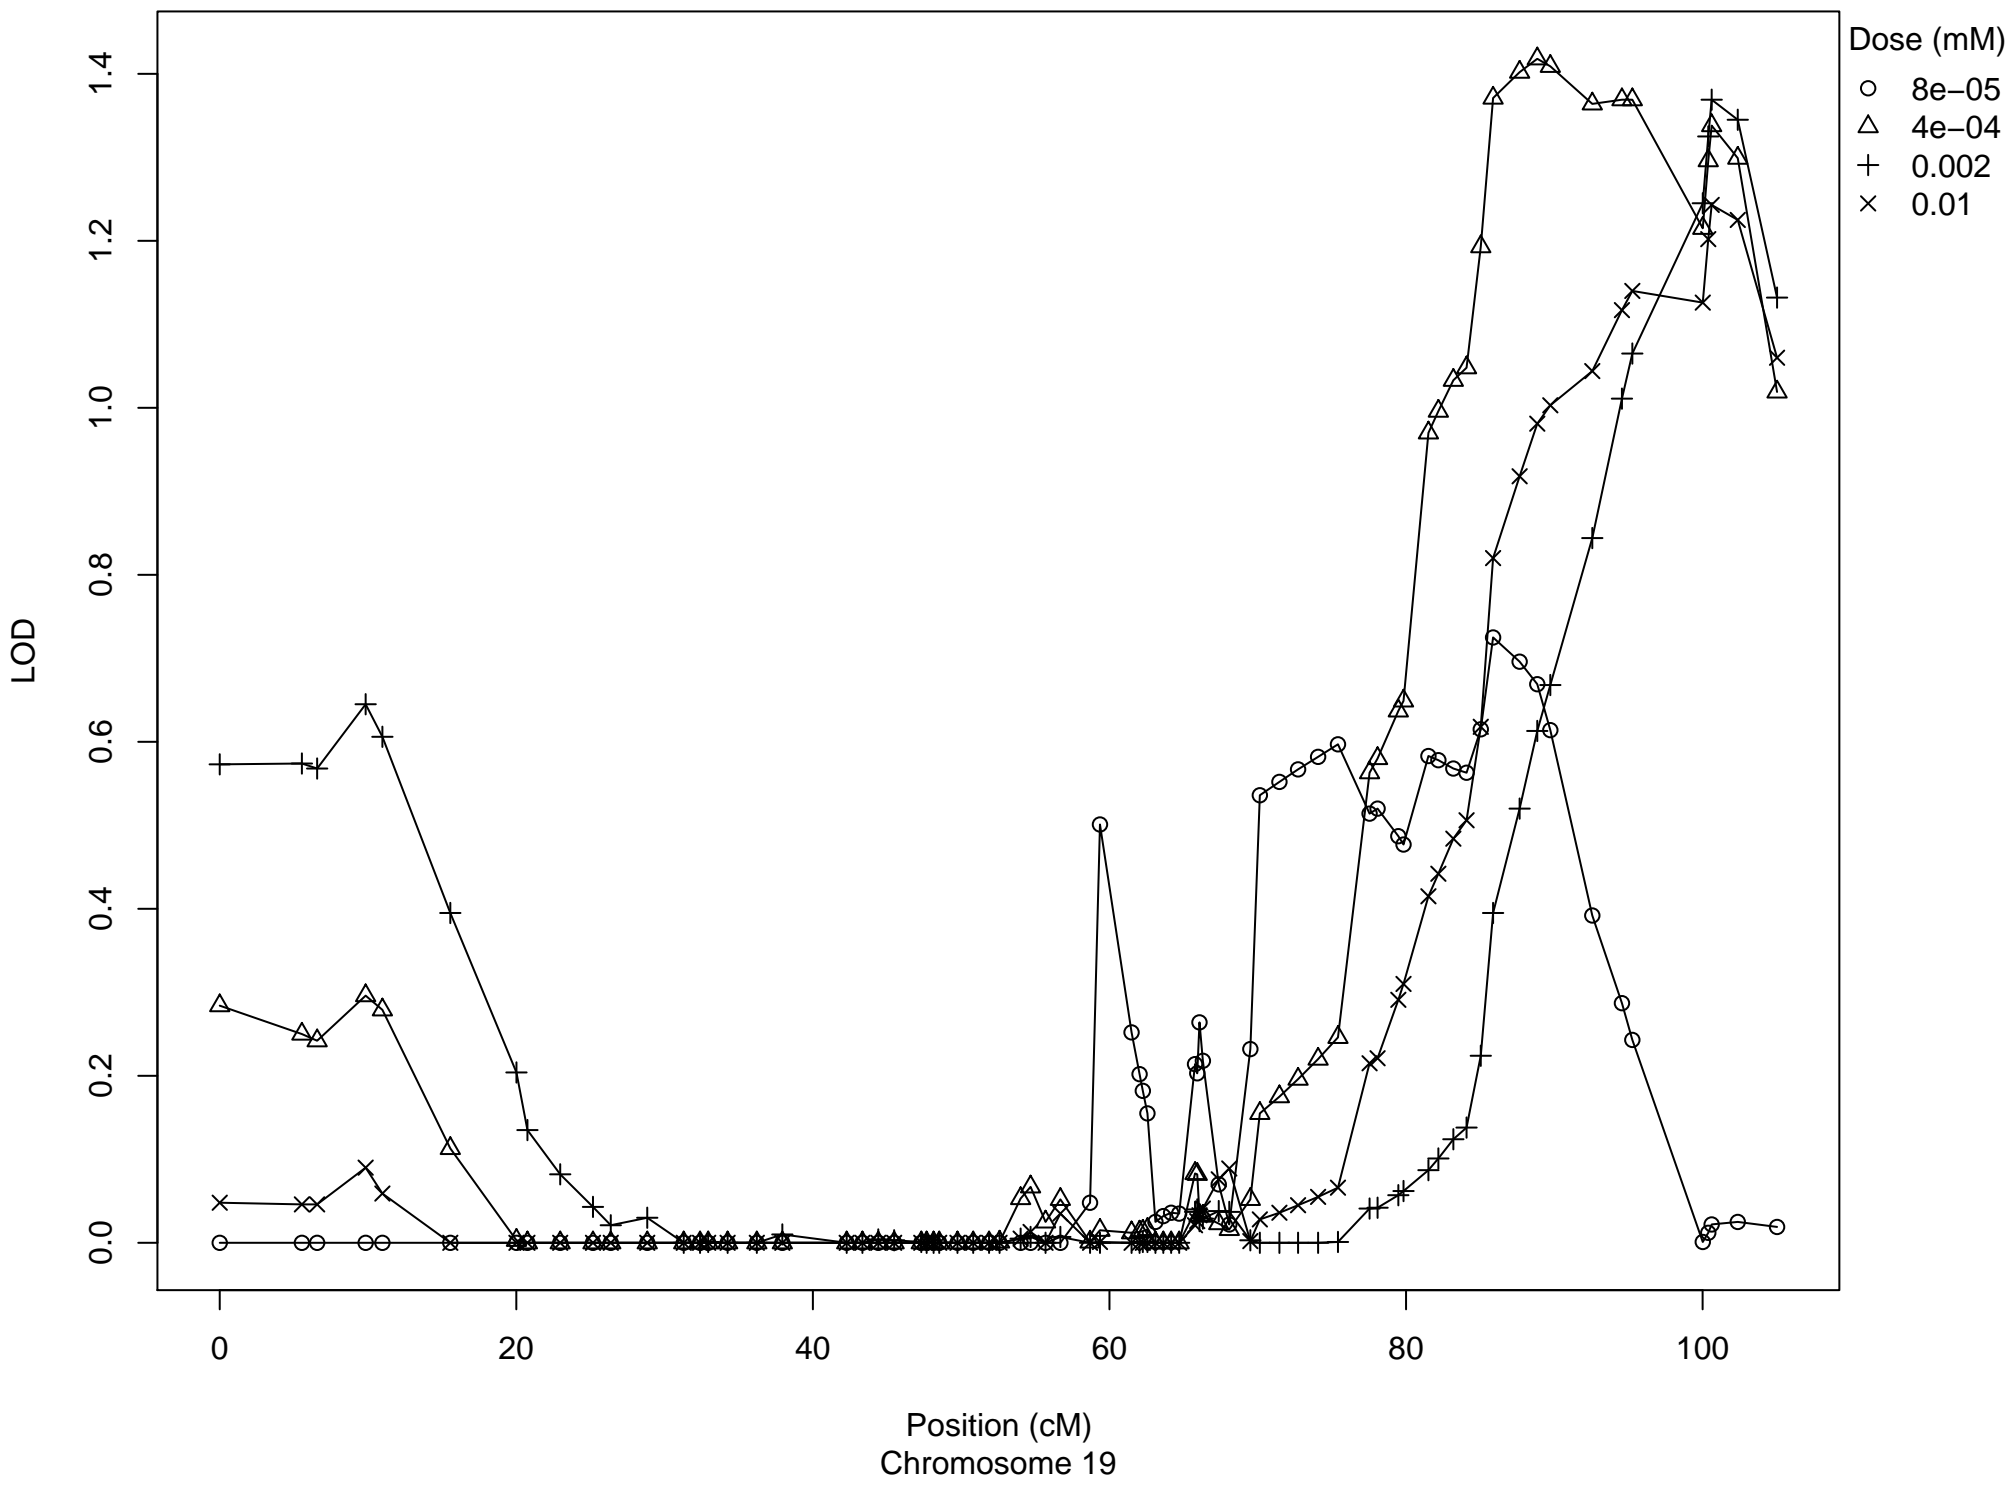

# Bleomycin sulfate (Bleo)

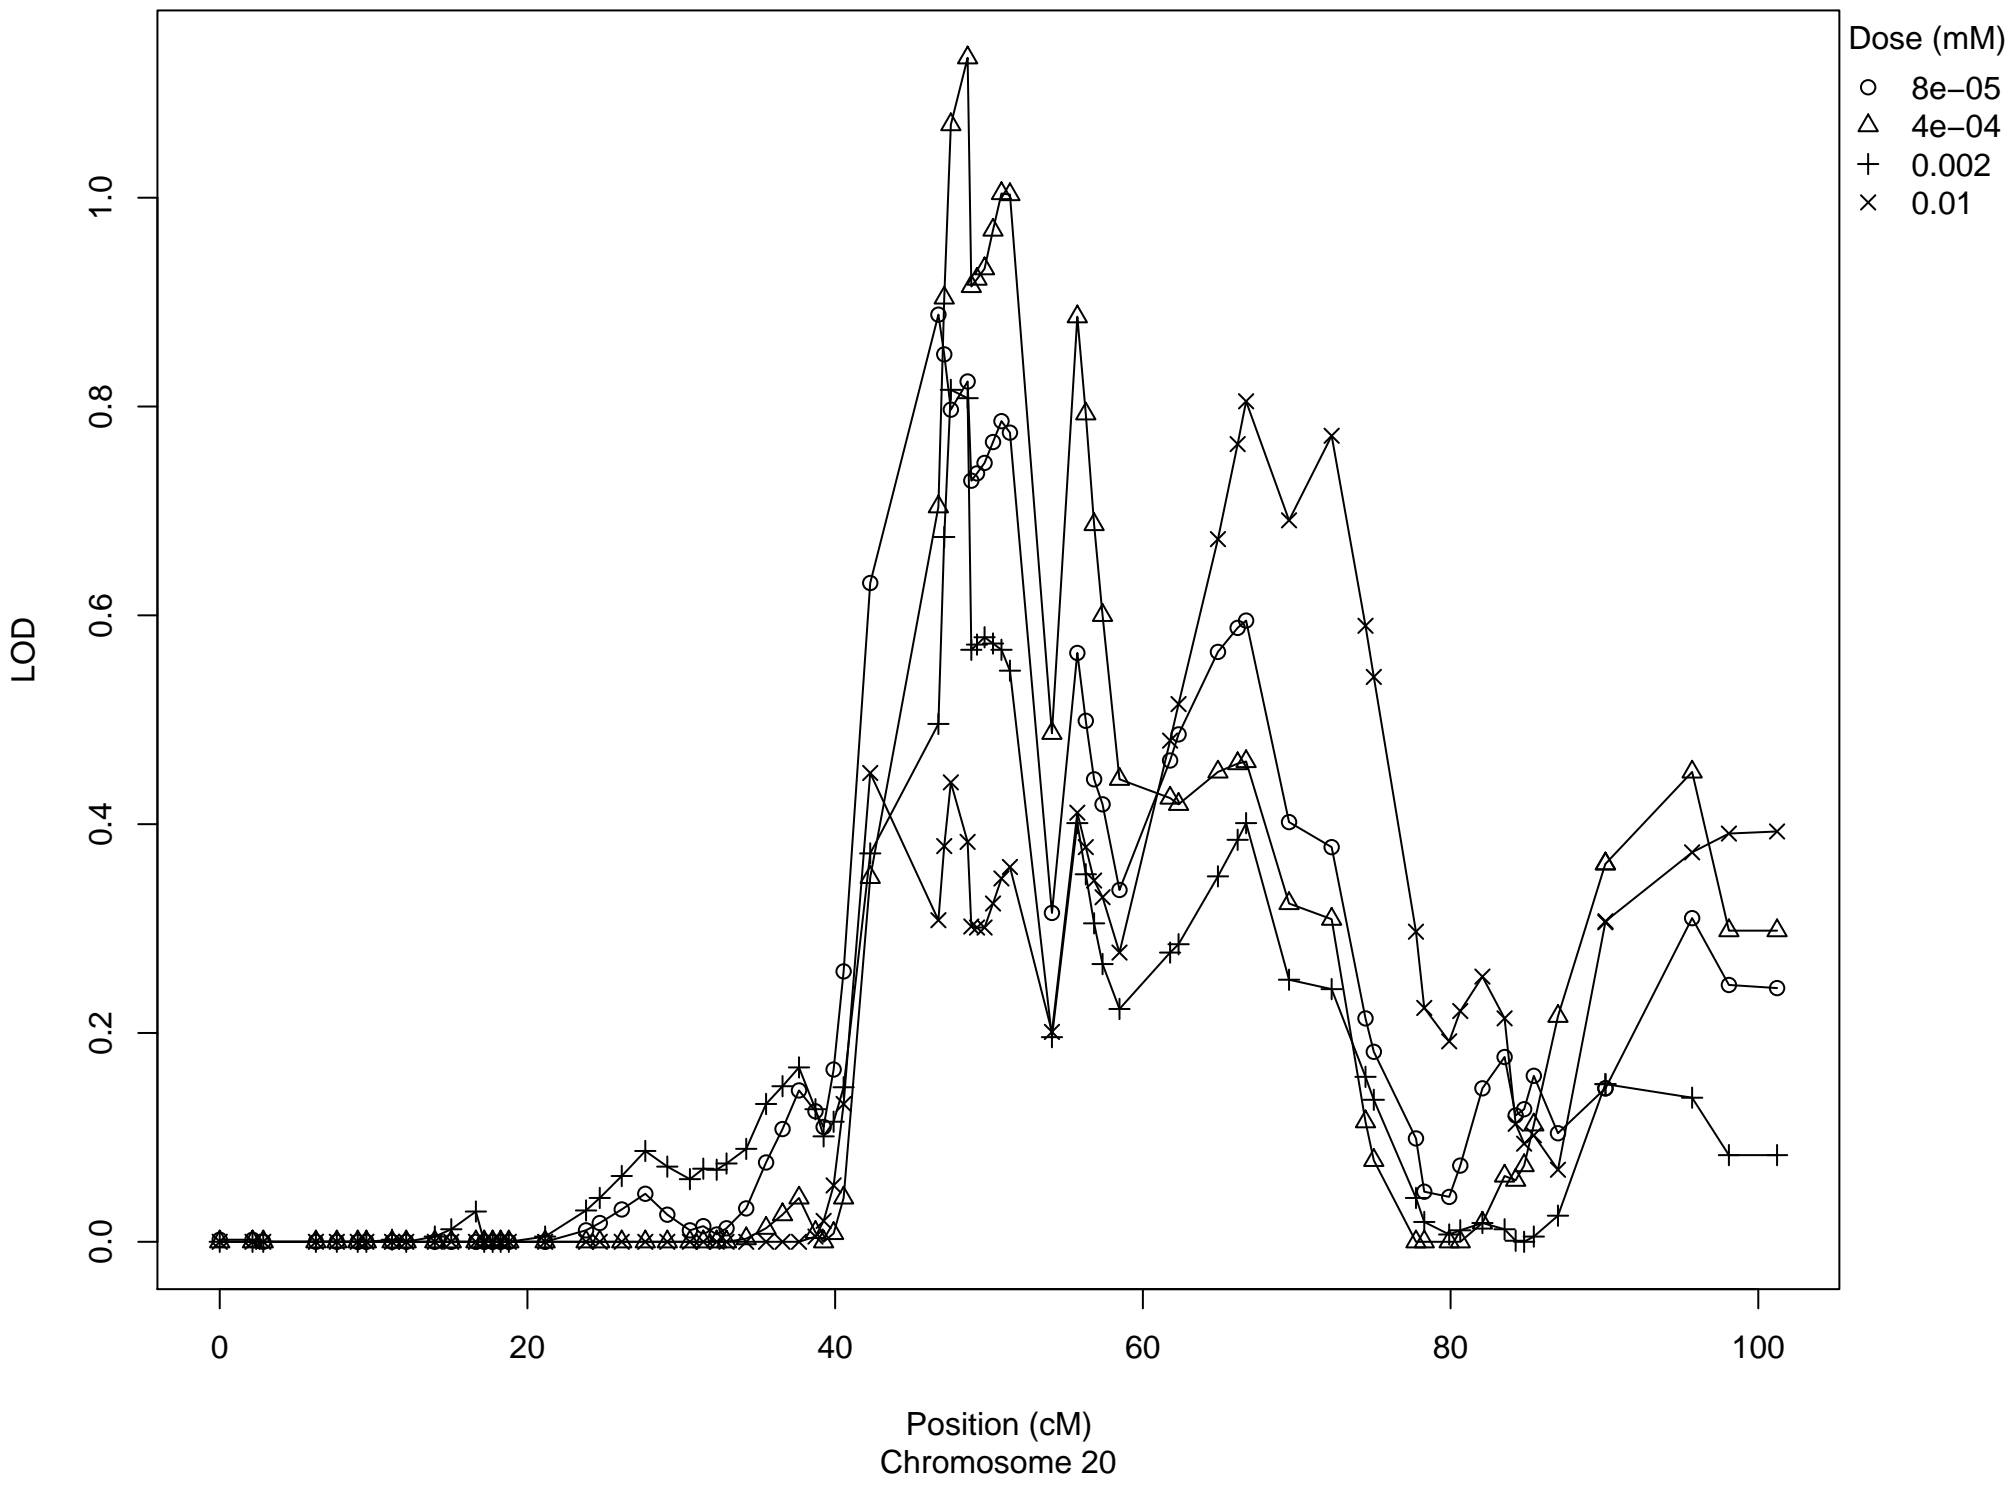



# Bleomycin sulfate (Bleo)

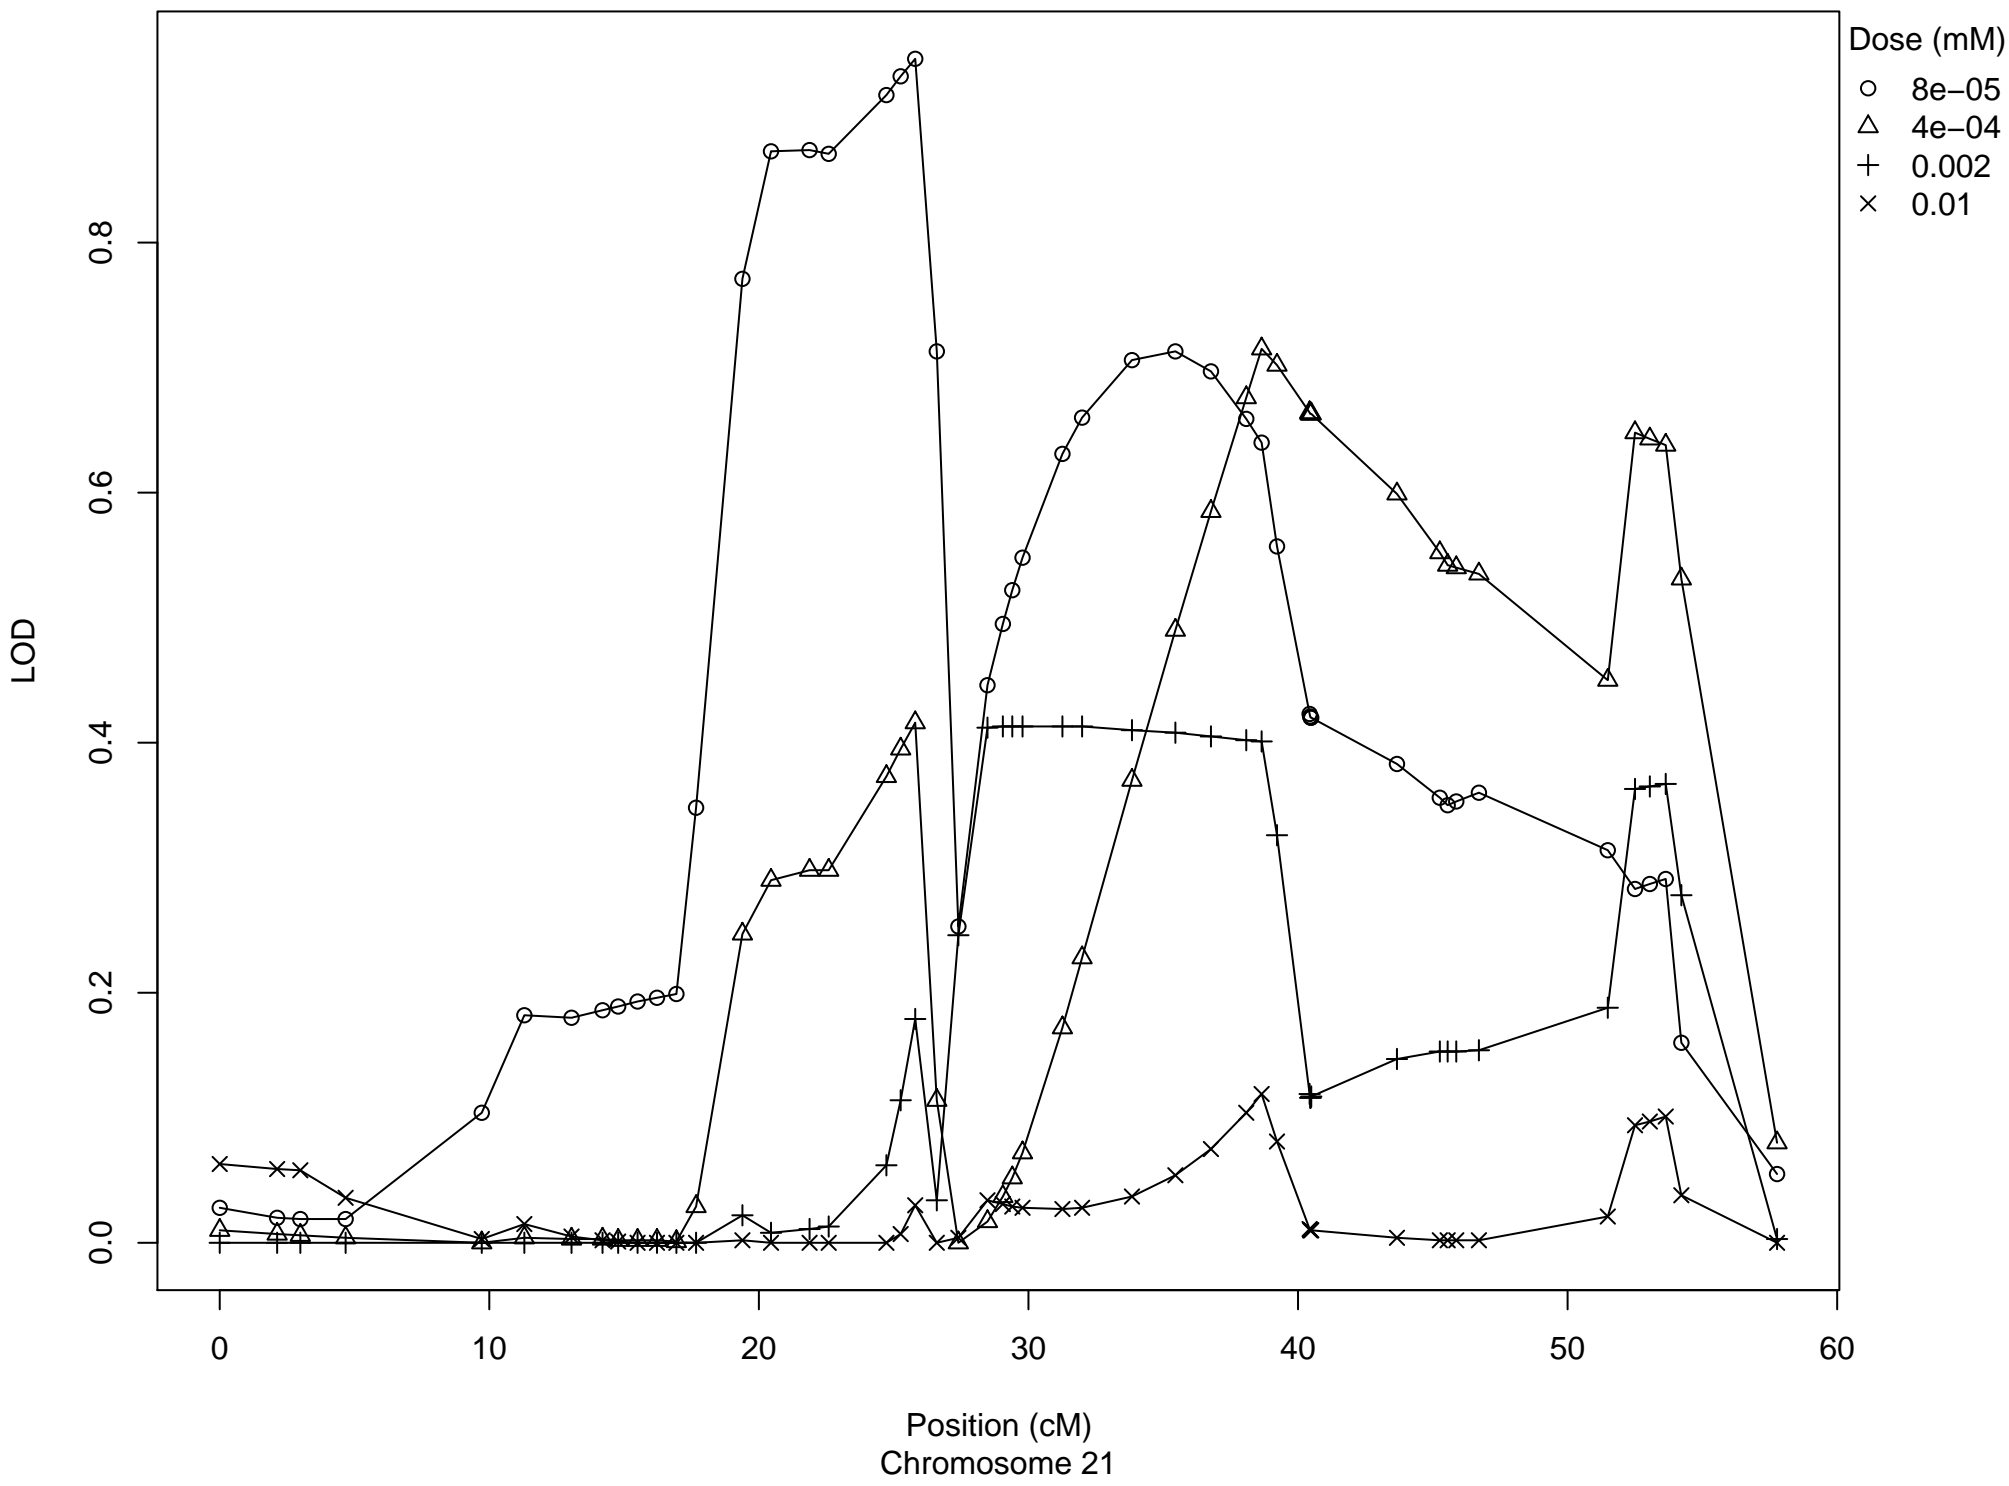

# Bleomycin sulfate (Bleo)

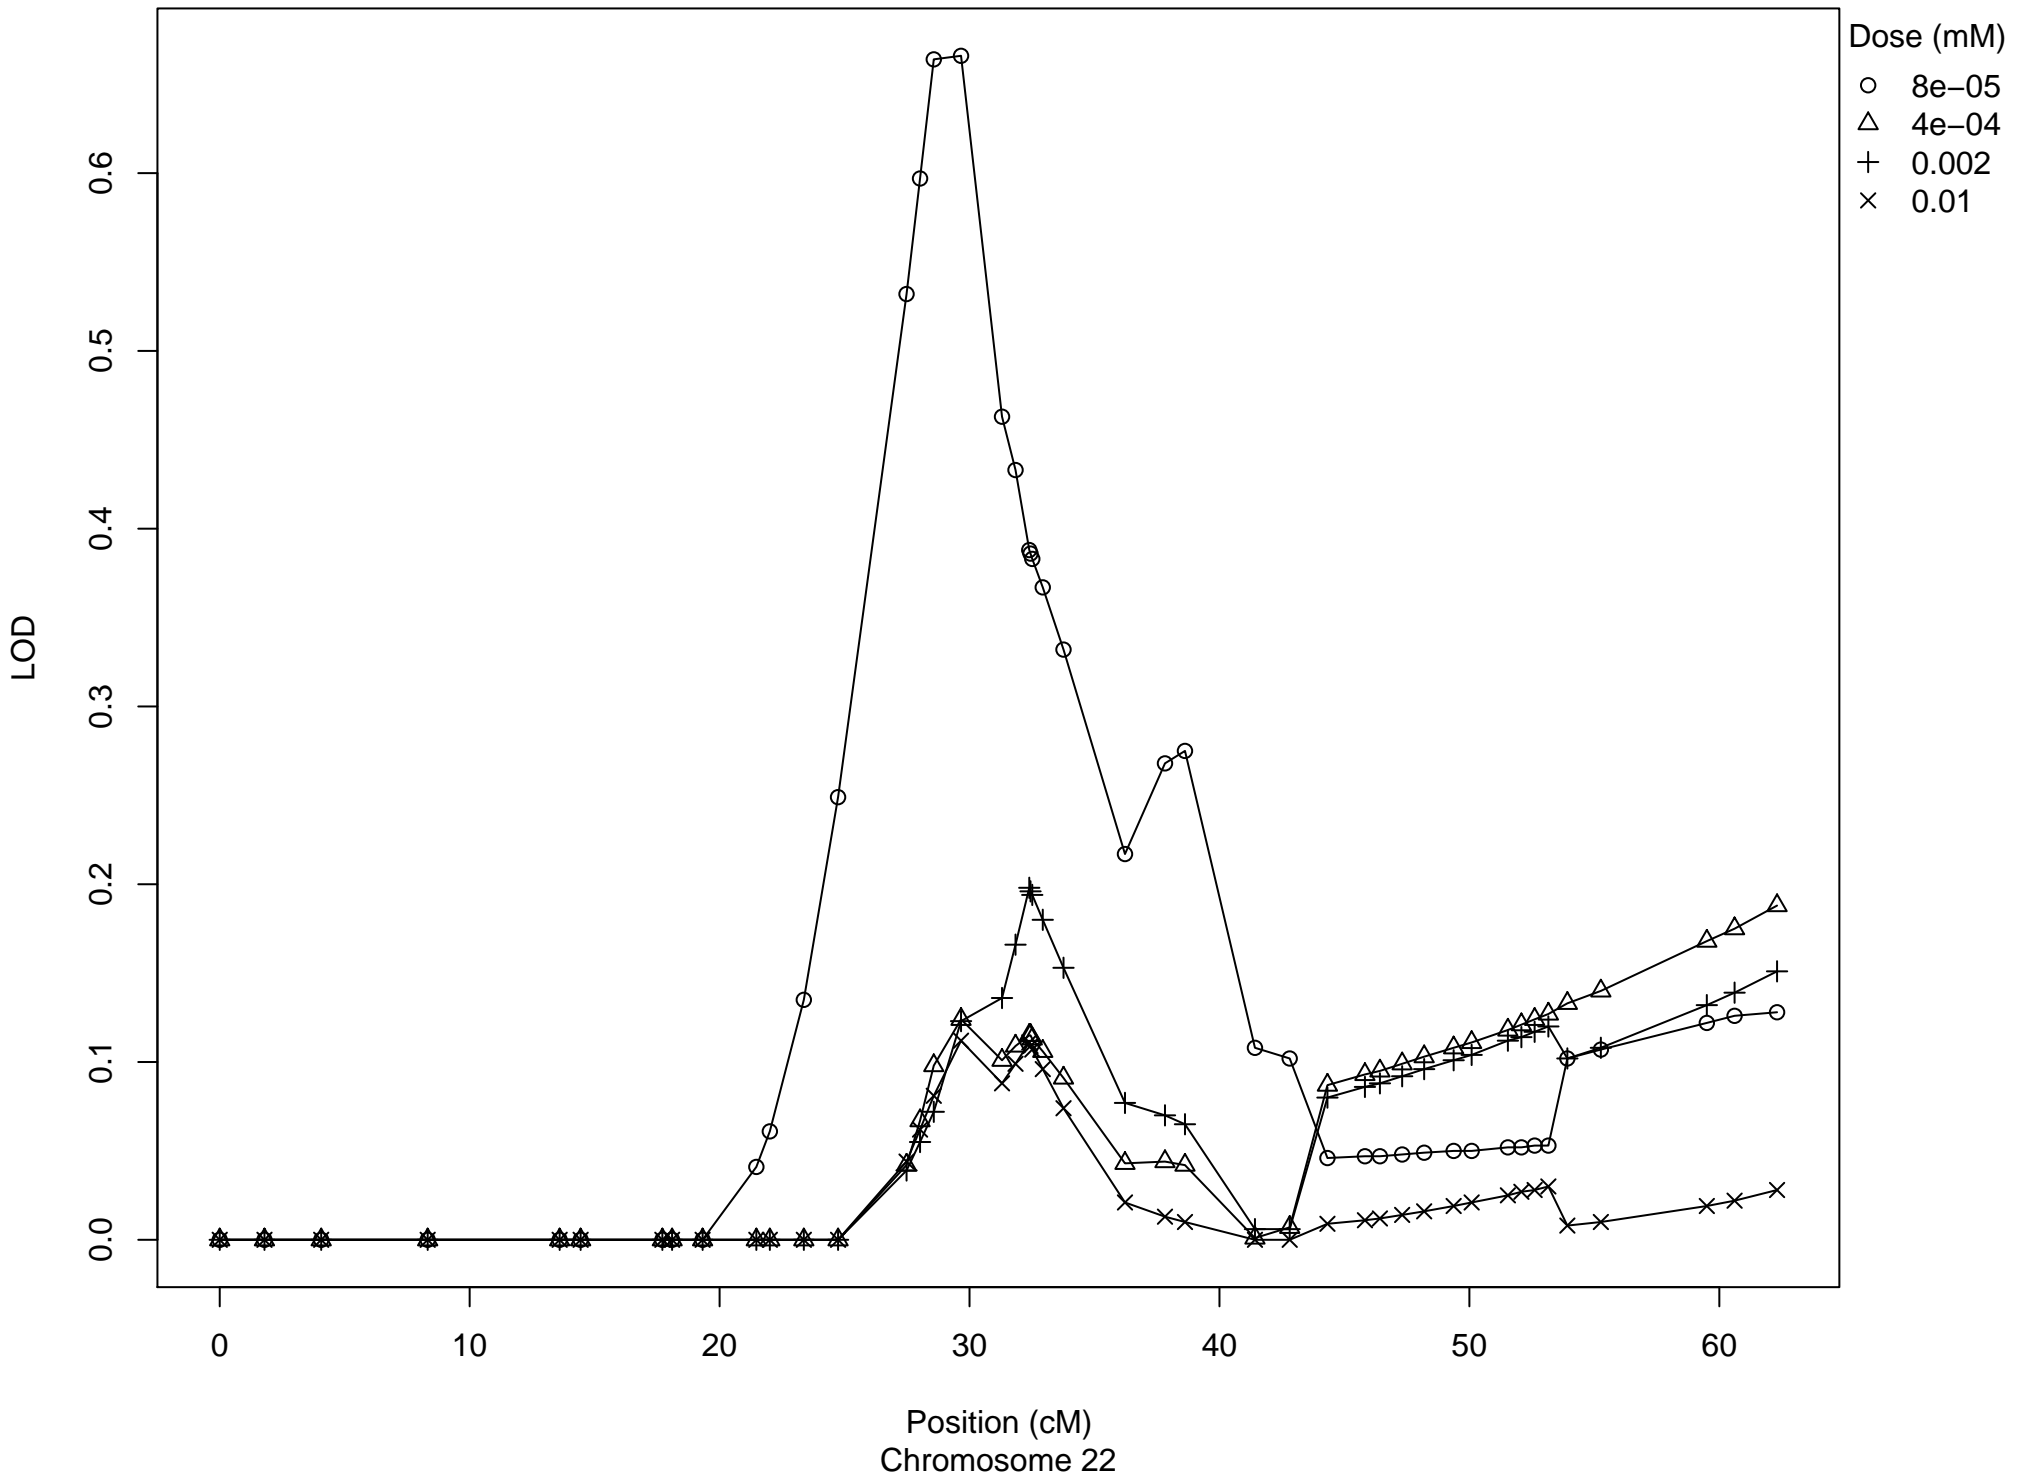

# Busulfan (Busulf)

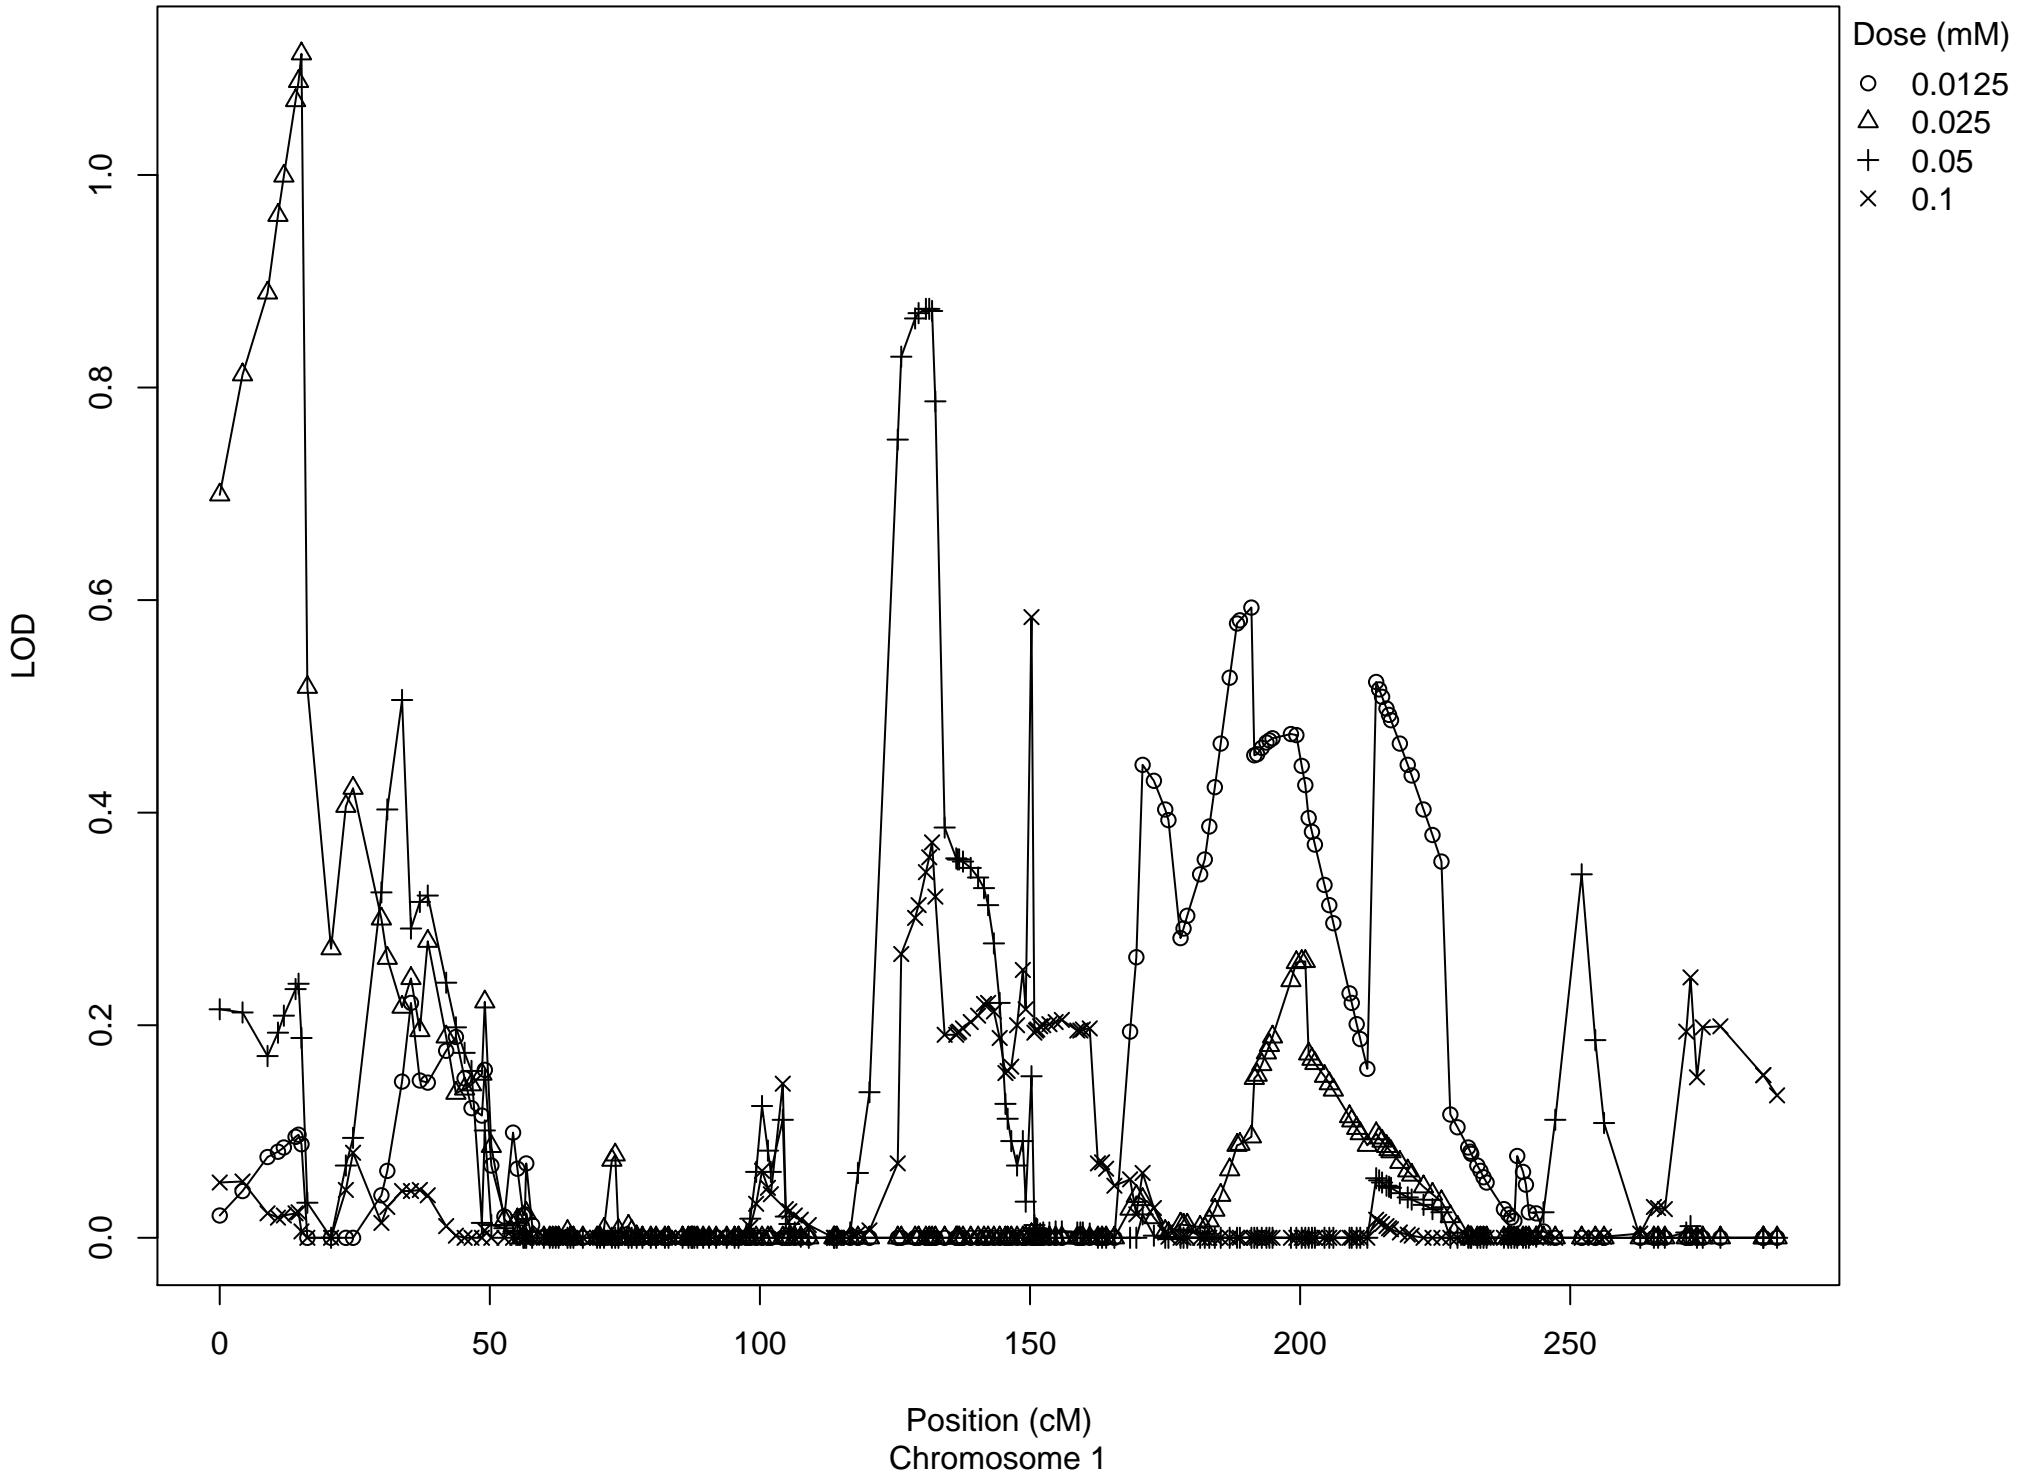

# Busulfan (Busulf)

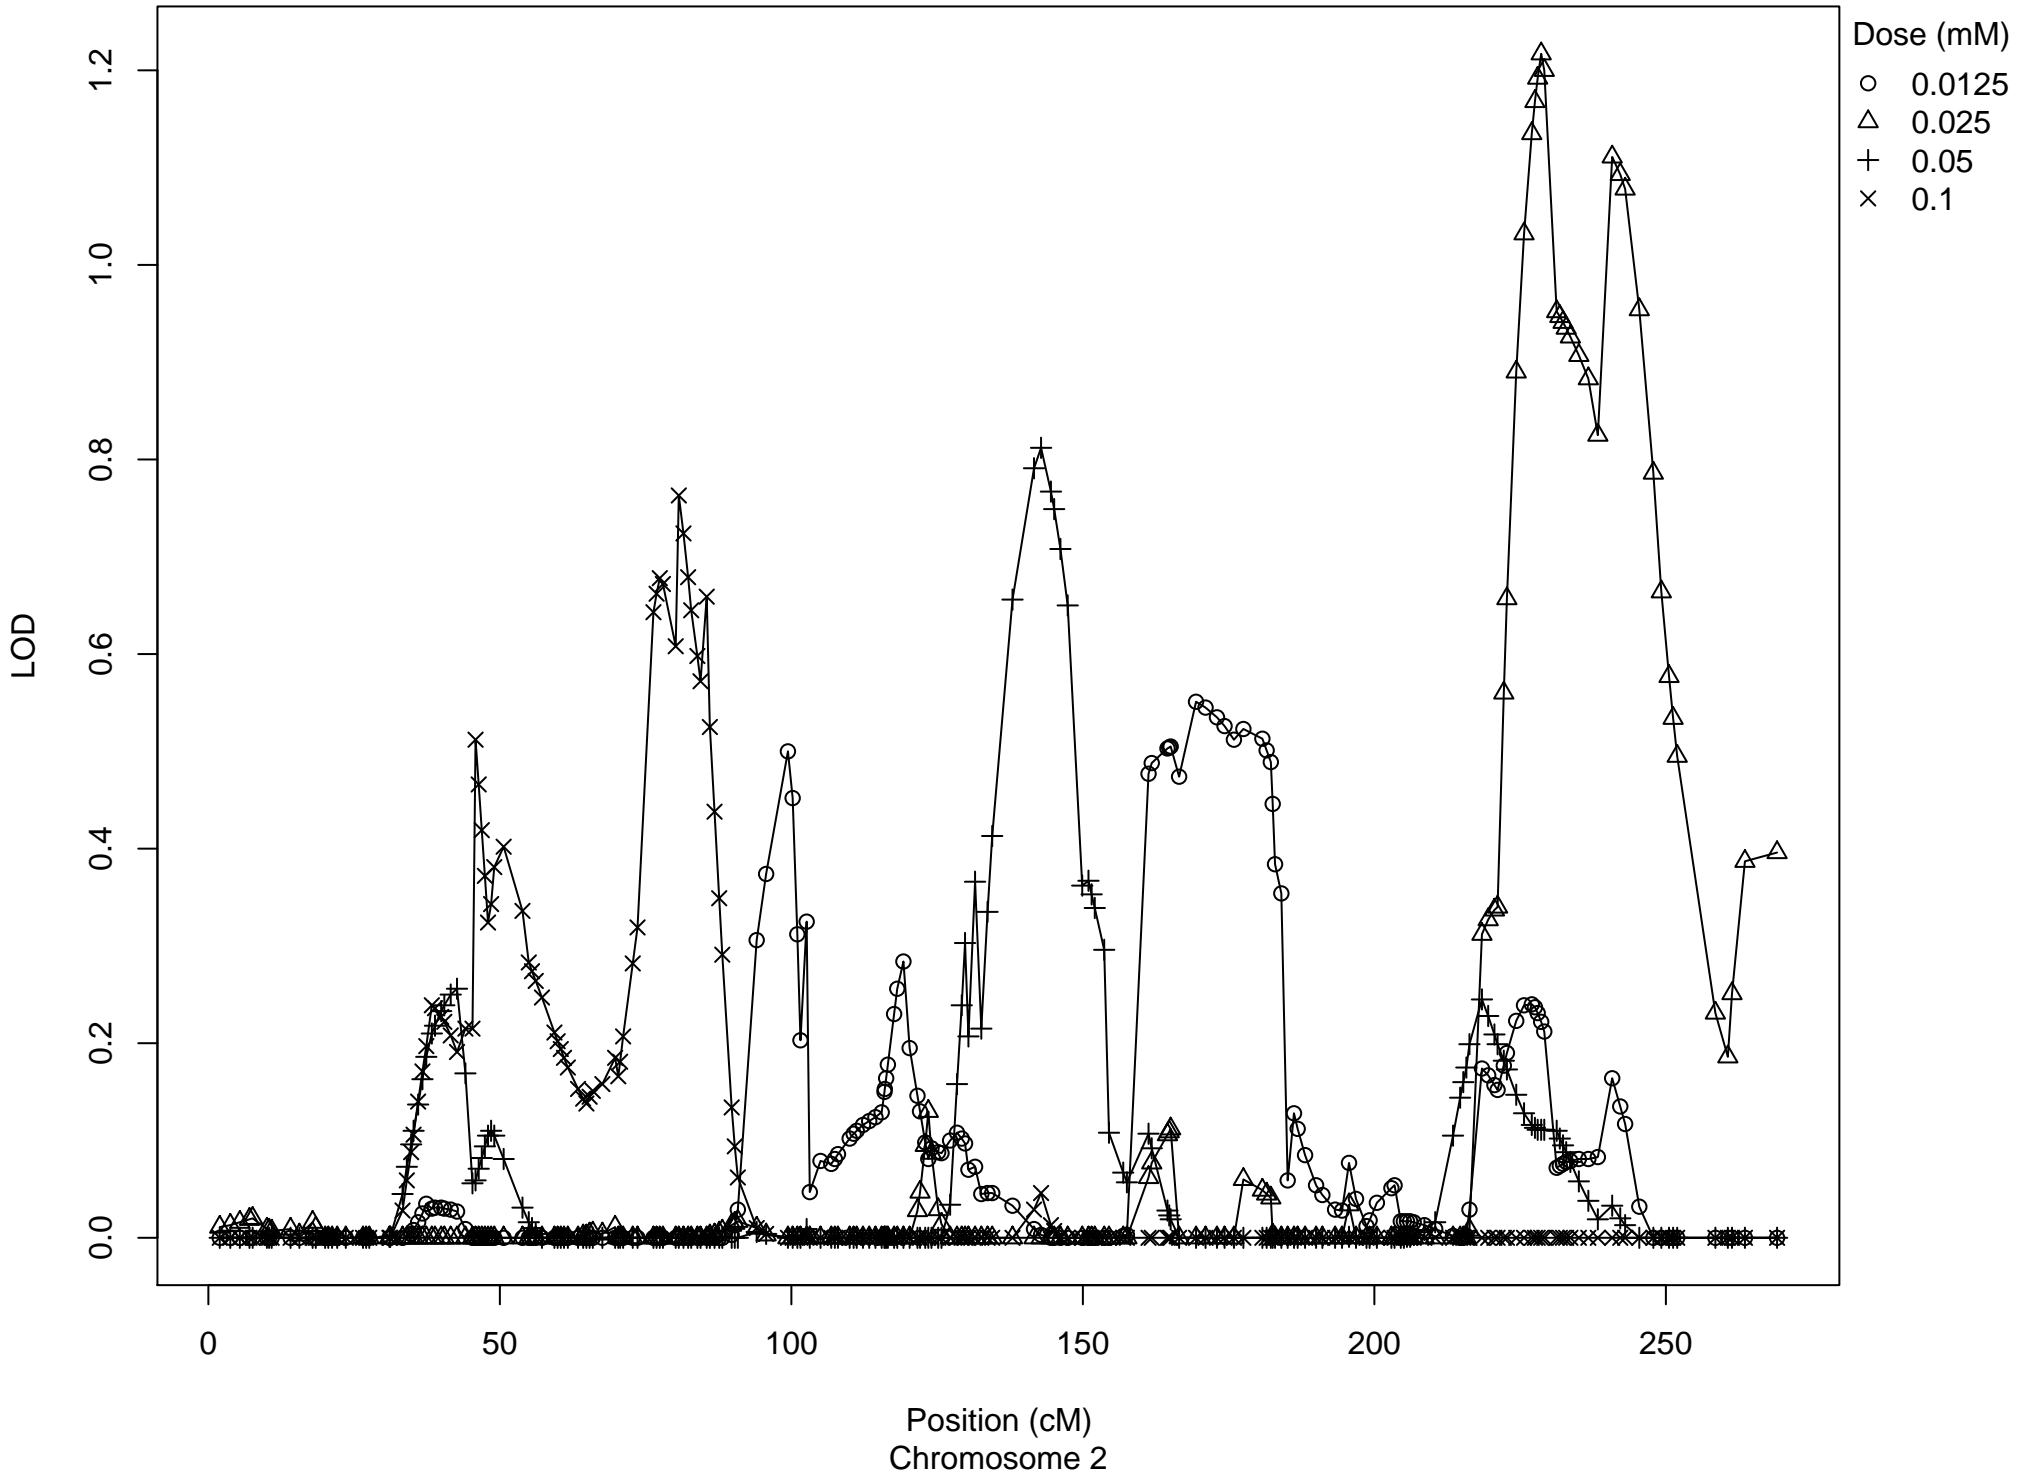

# Busulfan (Busulf)

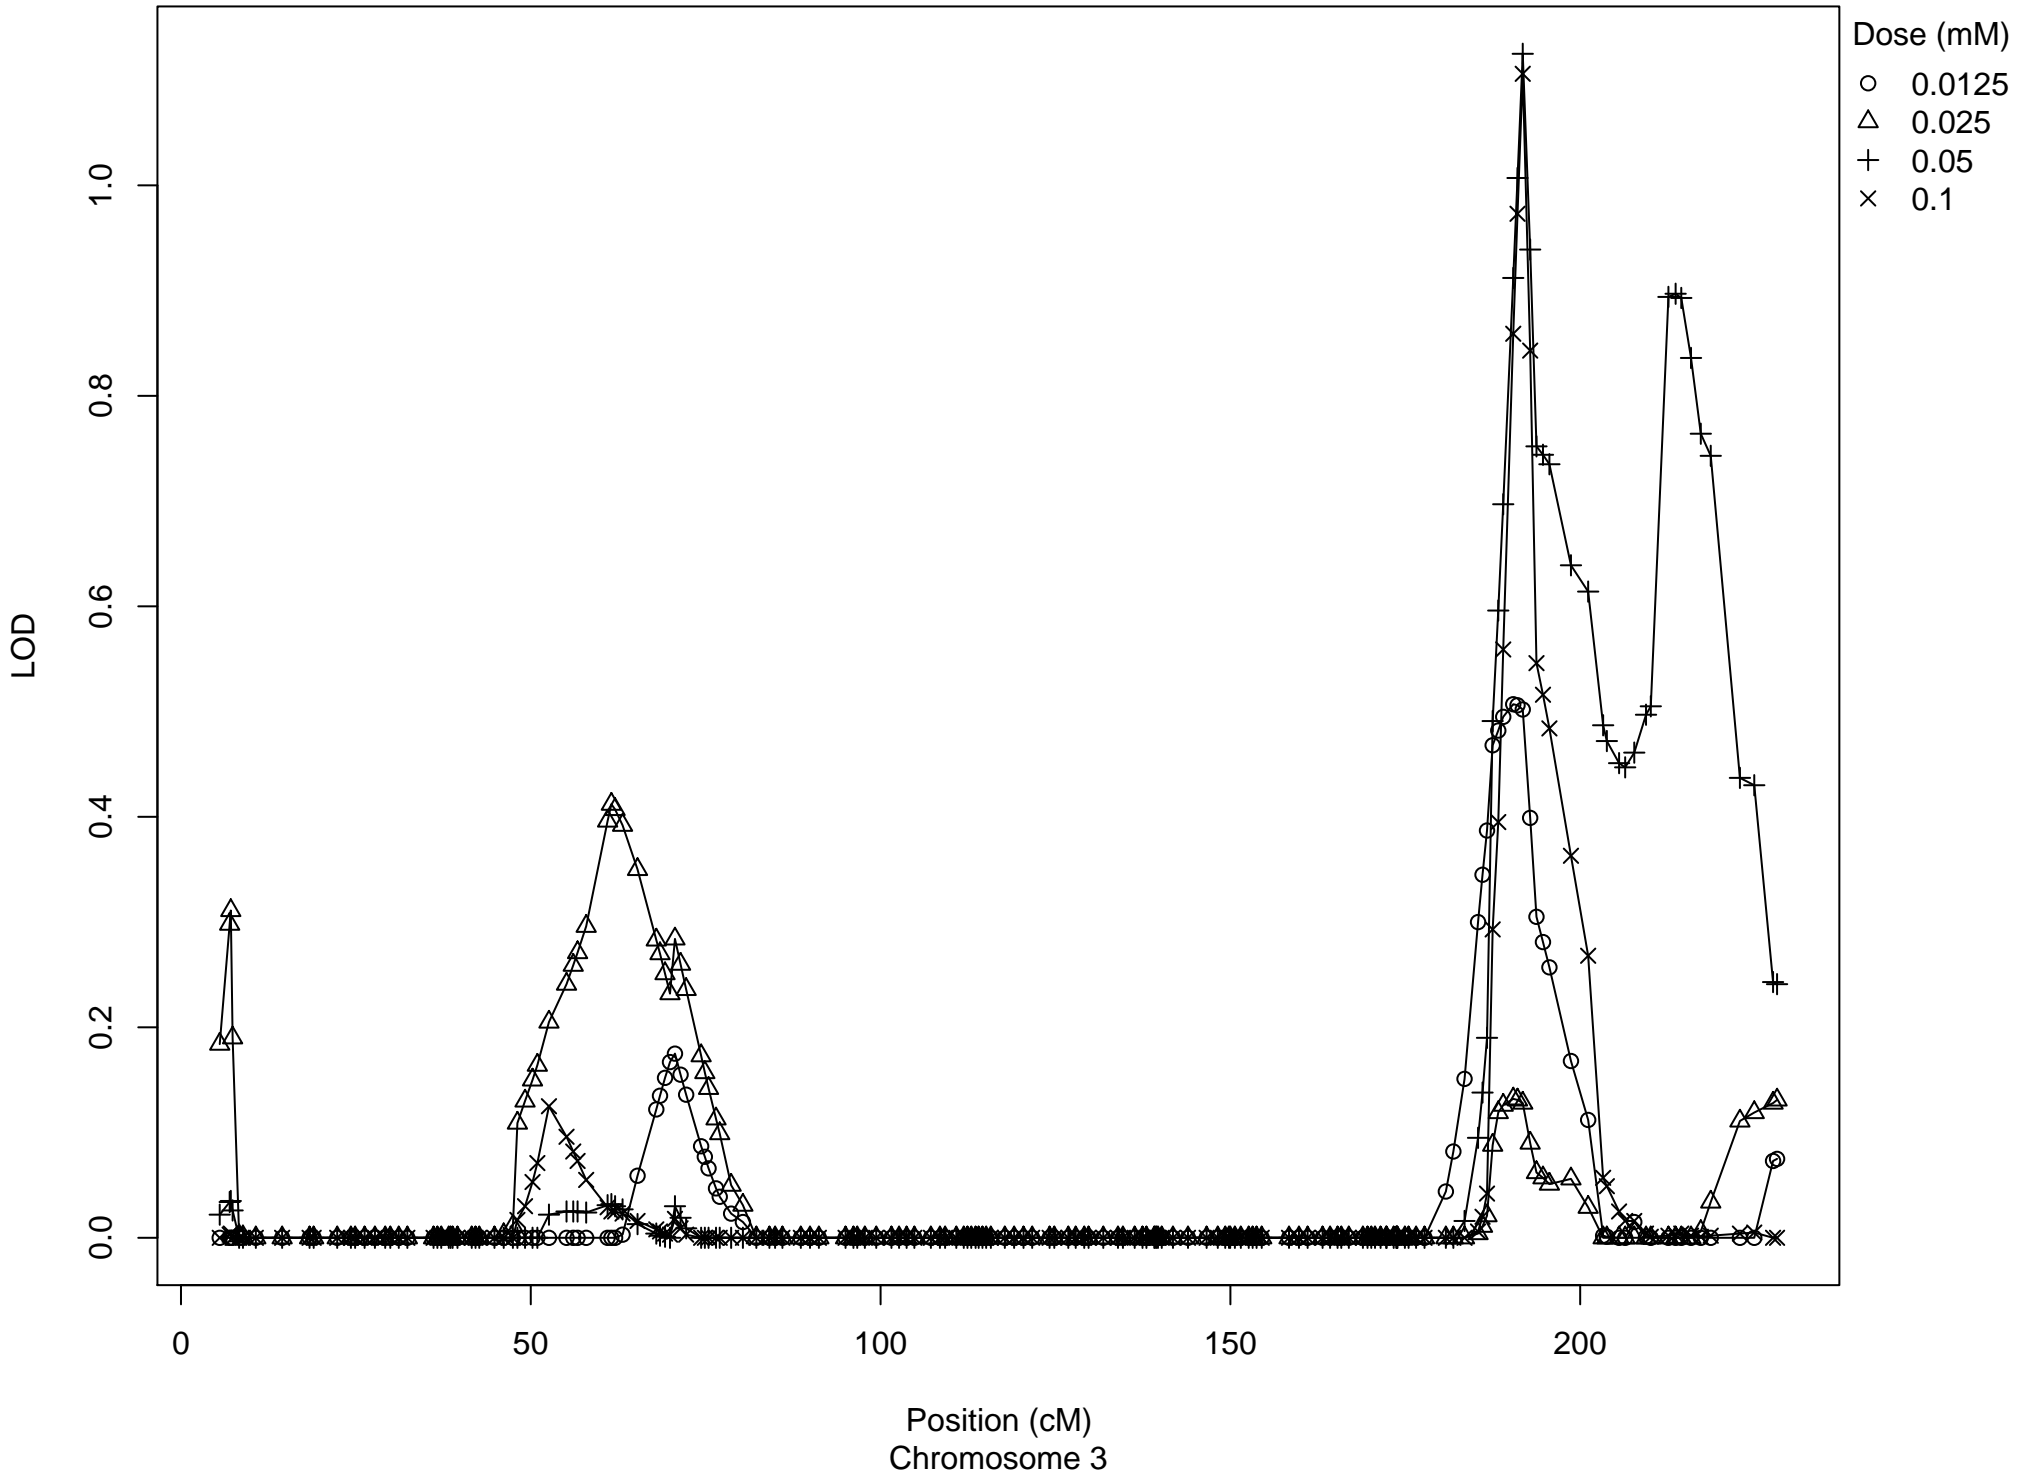

# Busulfan (Busulf)

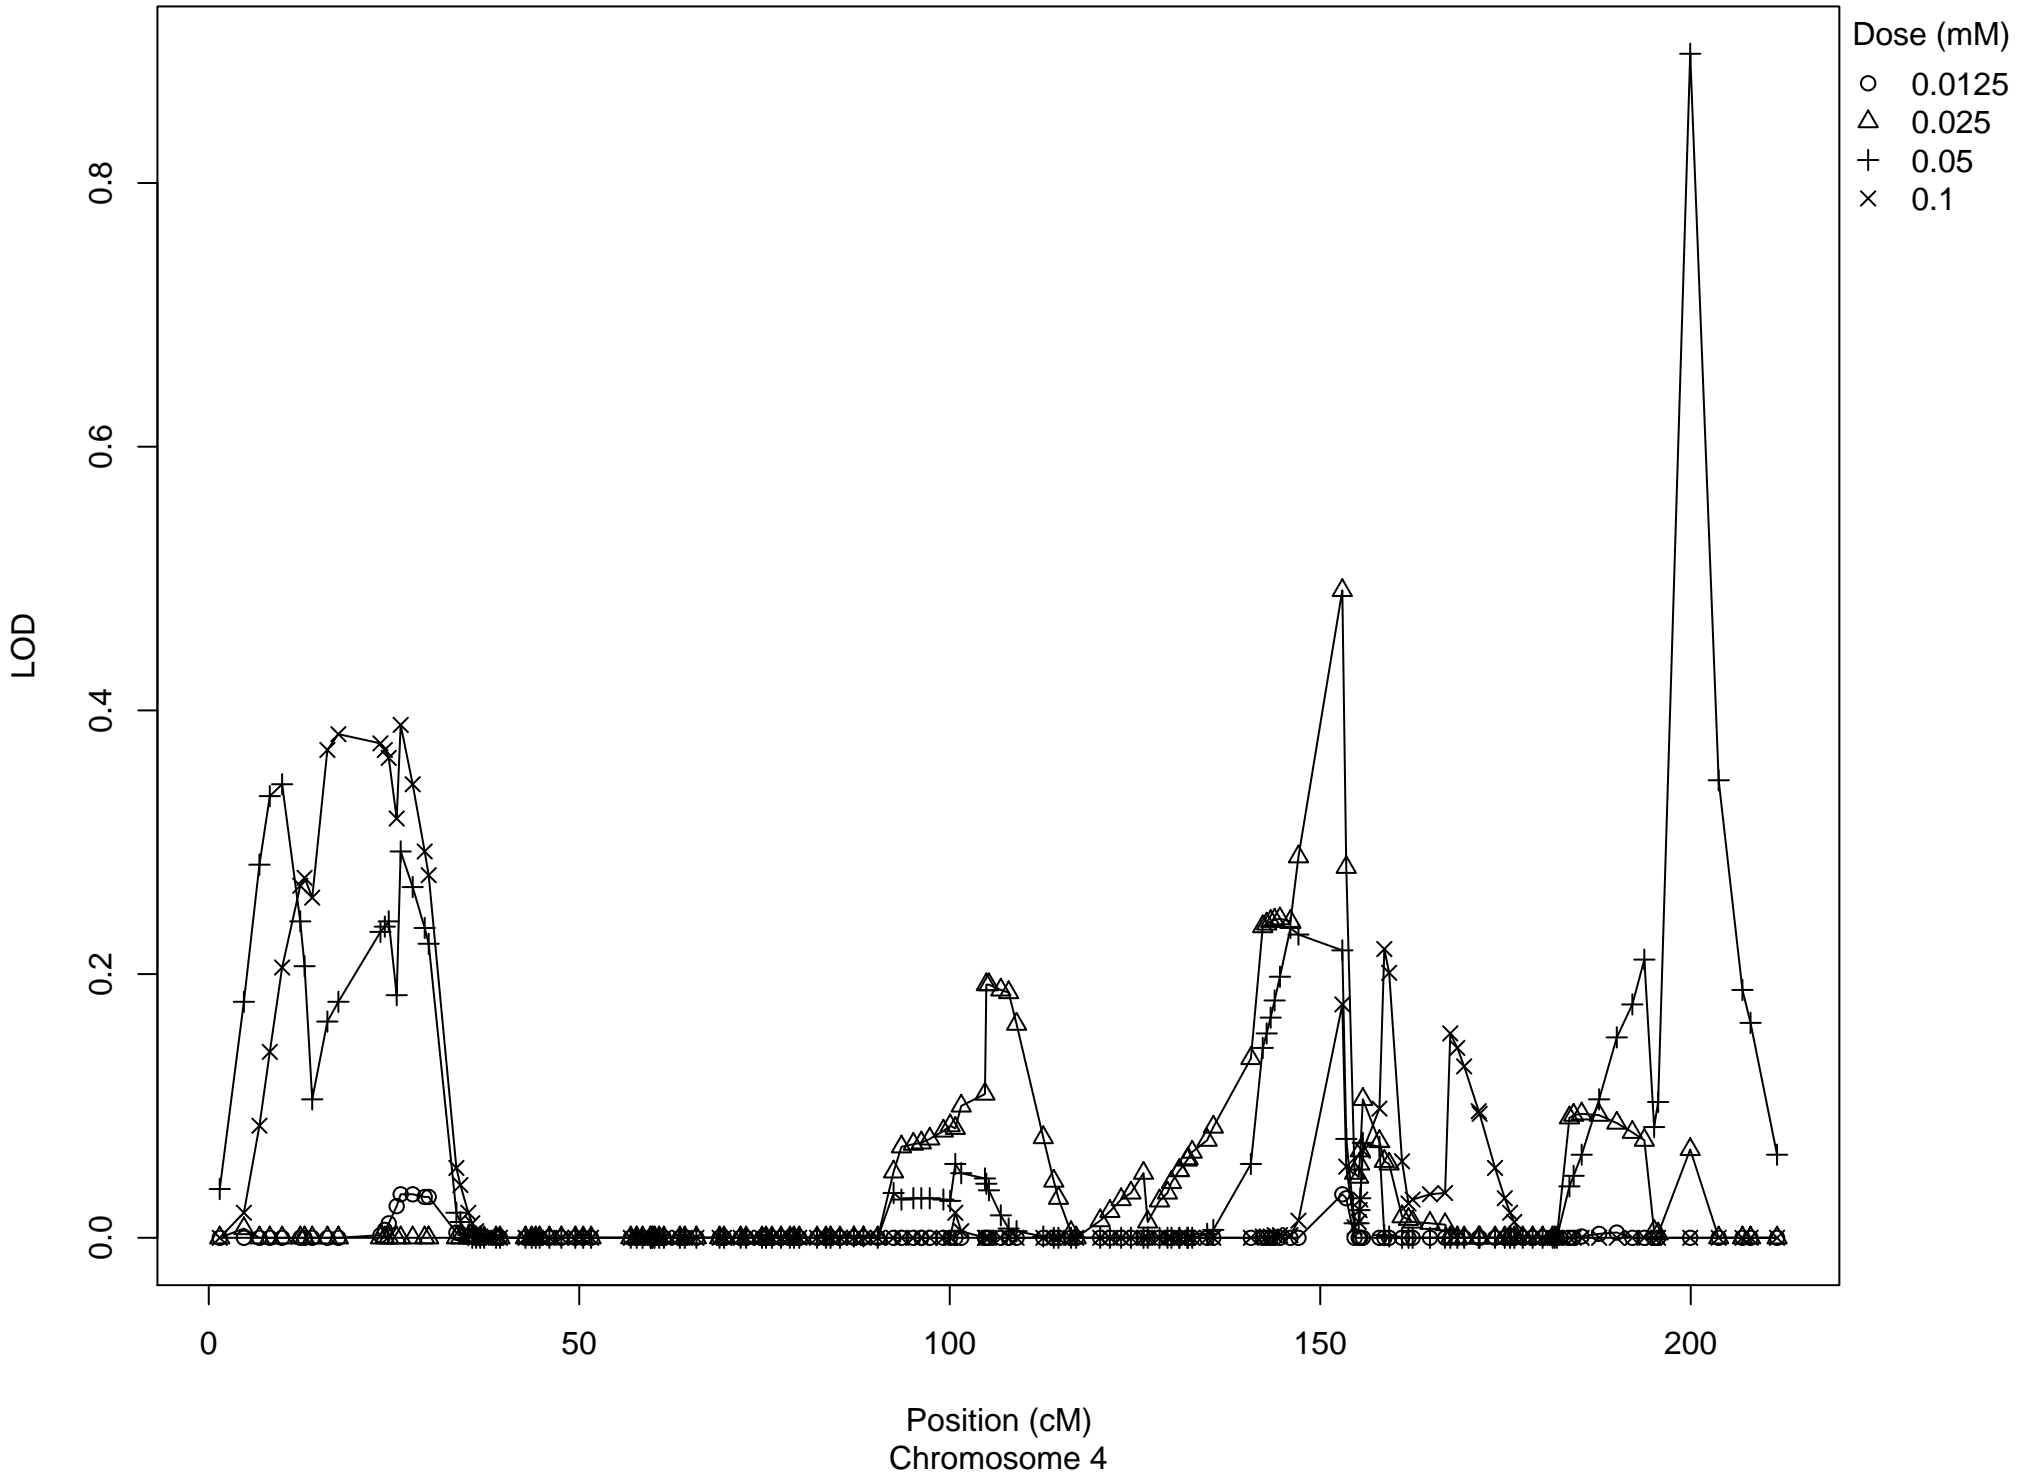

# Busulfan (Busulf)

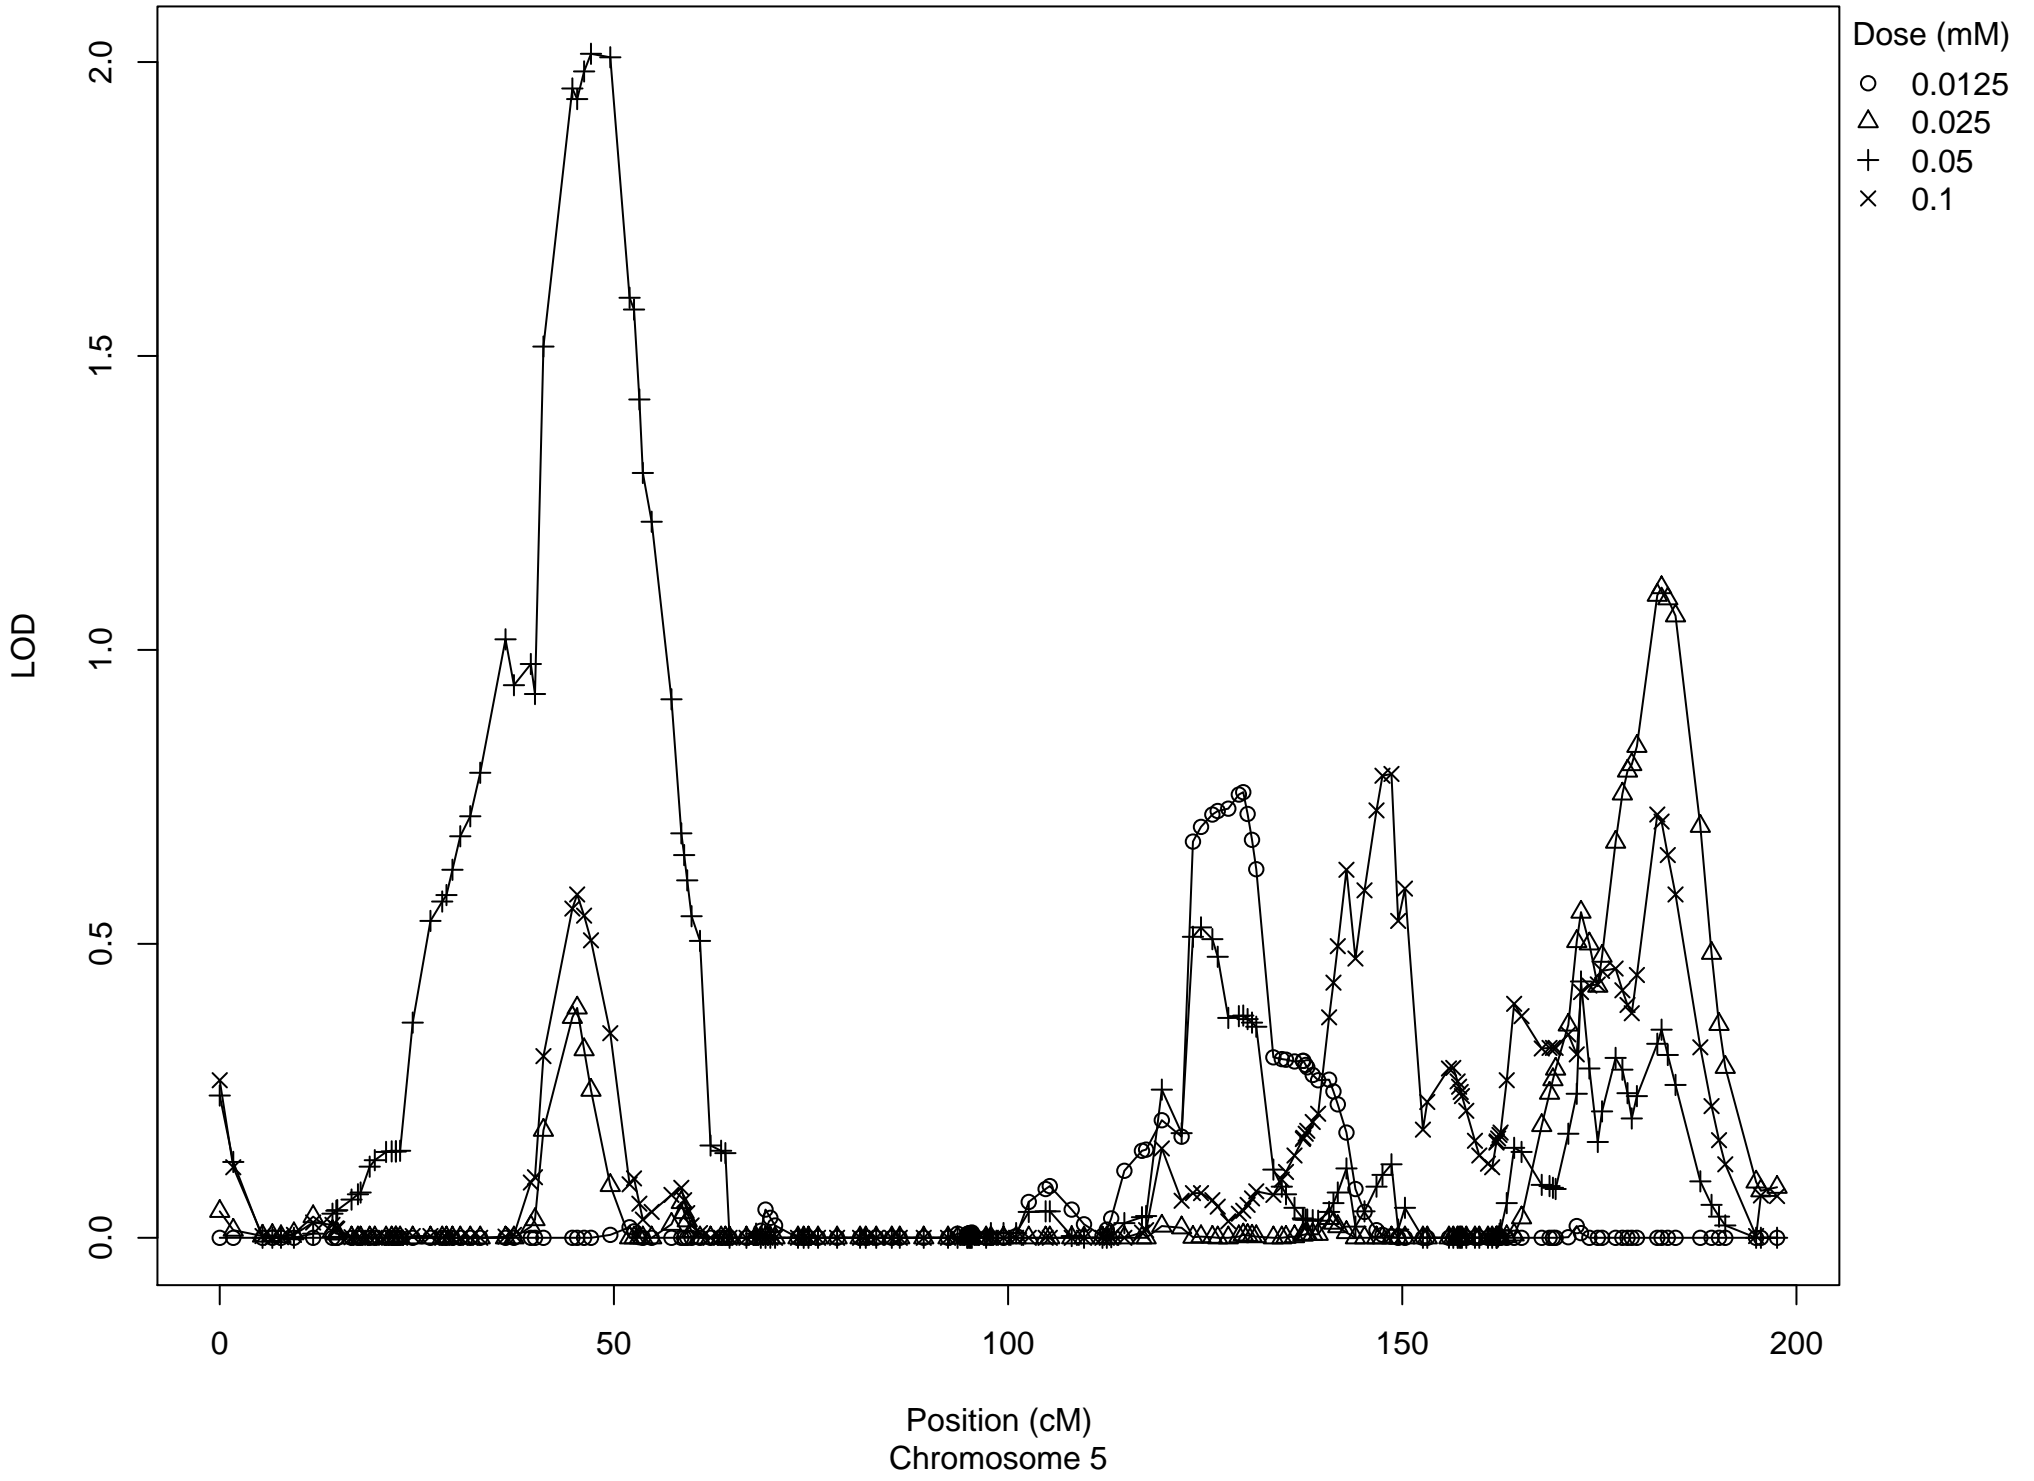

# Busulfan (Busulf)

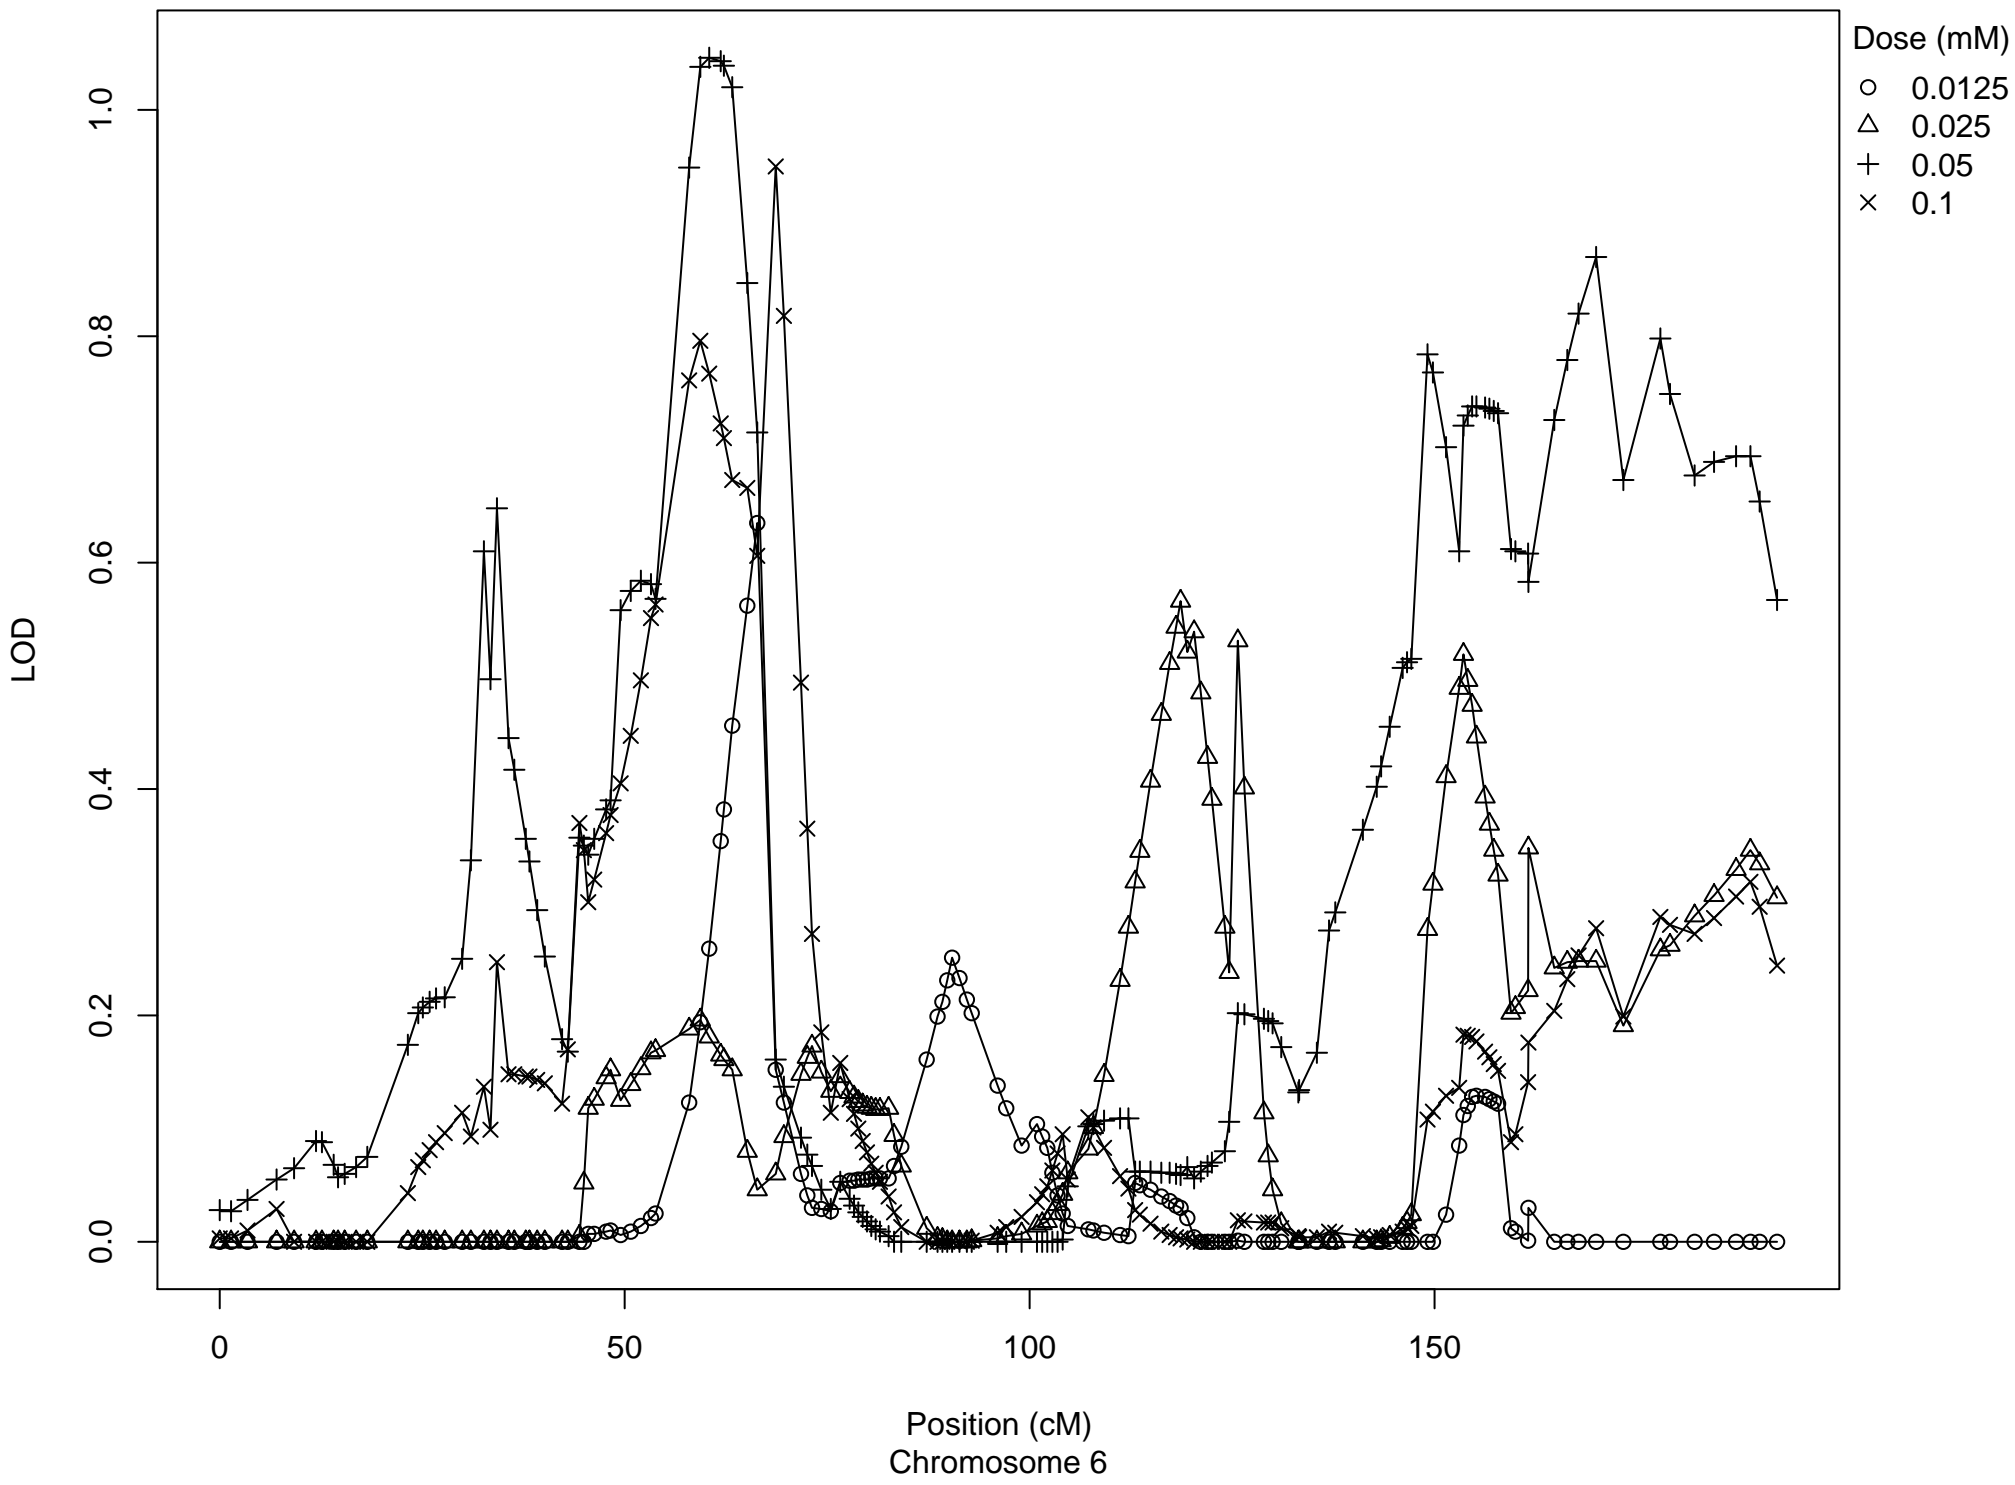



# Busulfan (Busulf)

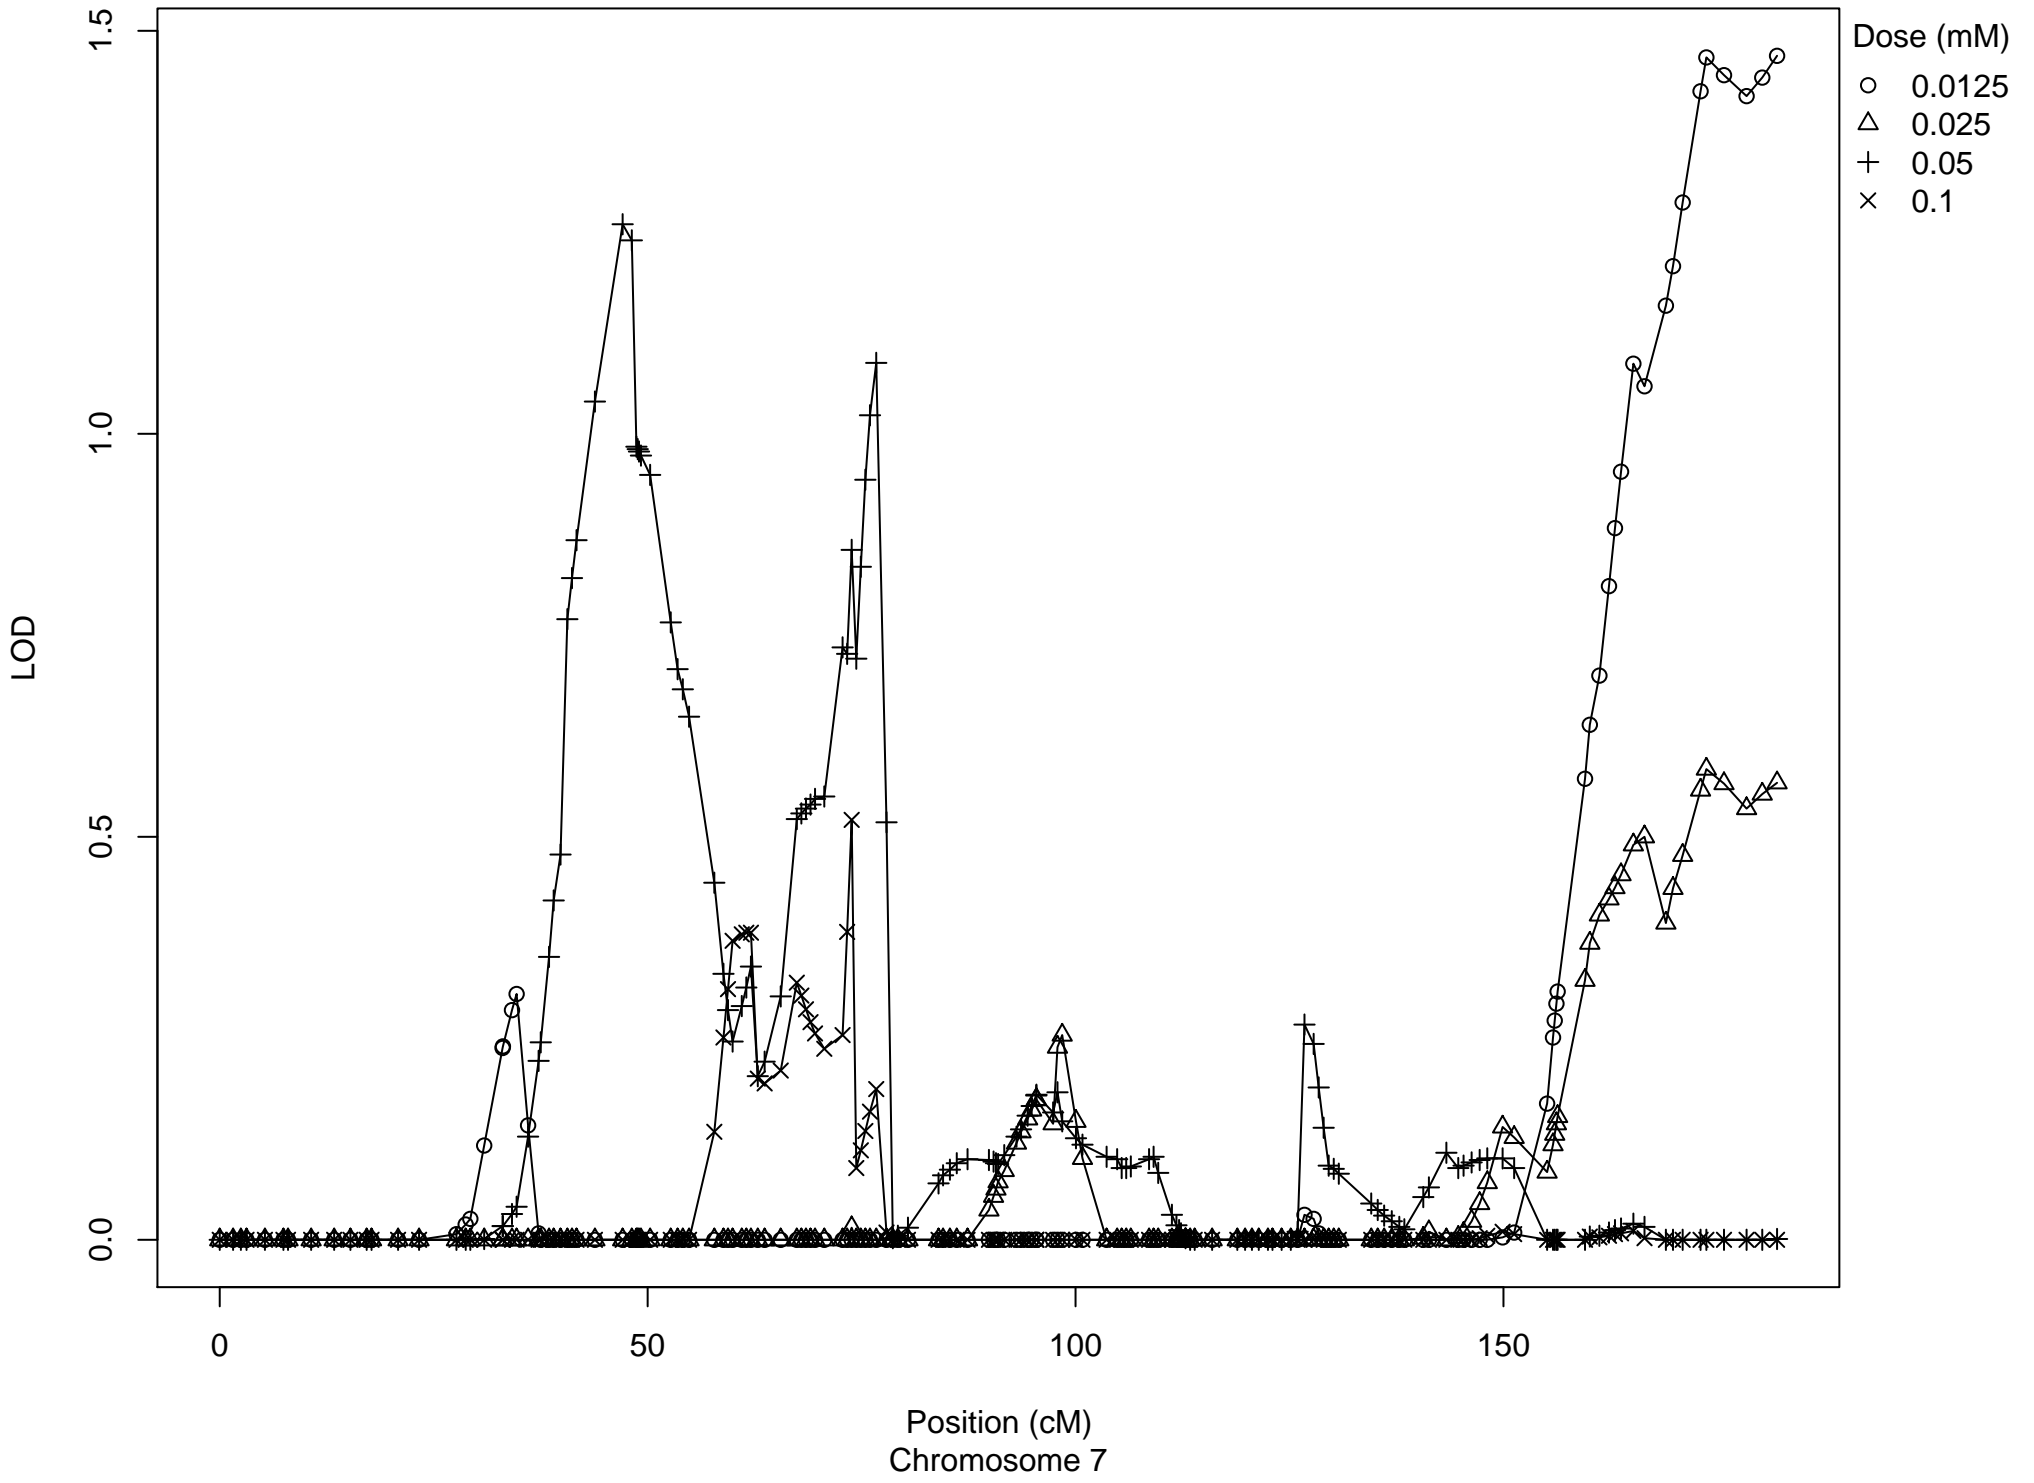

# Busulfan (Busulf)

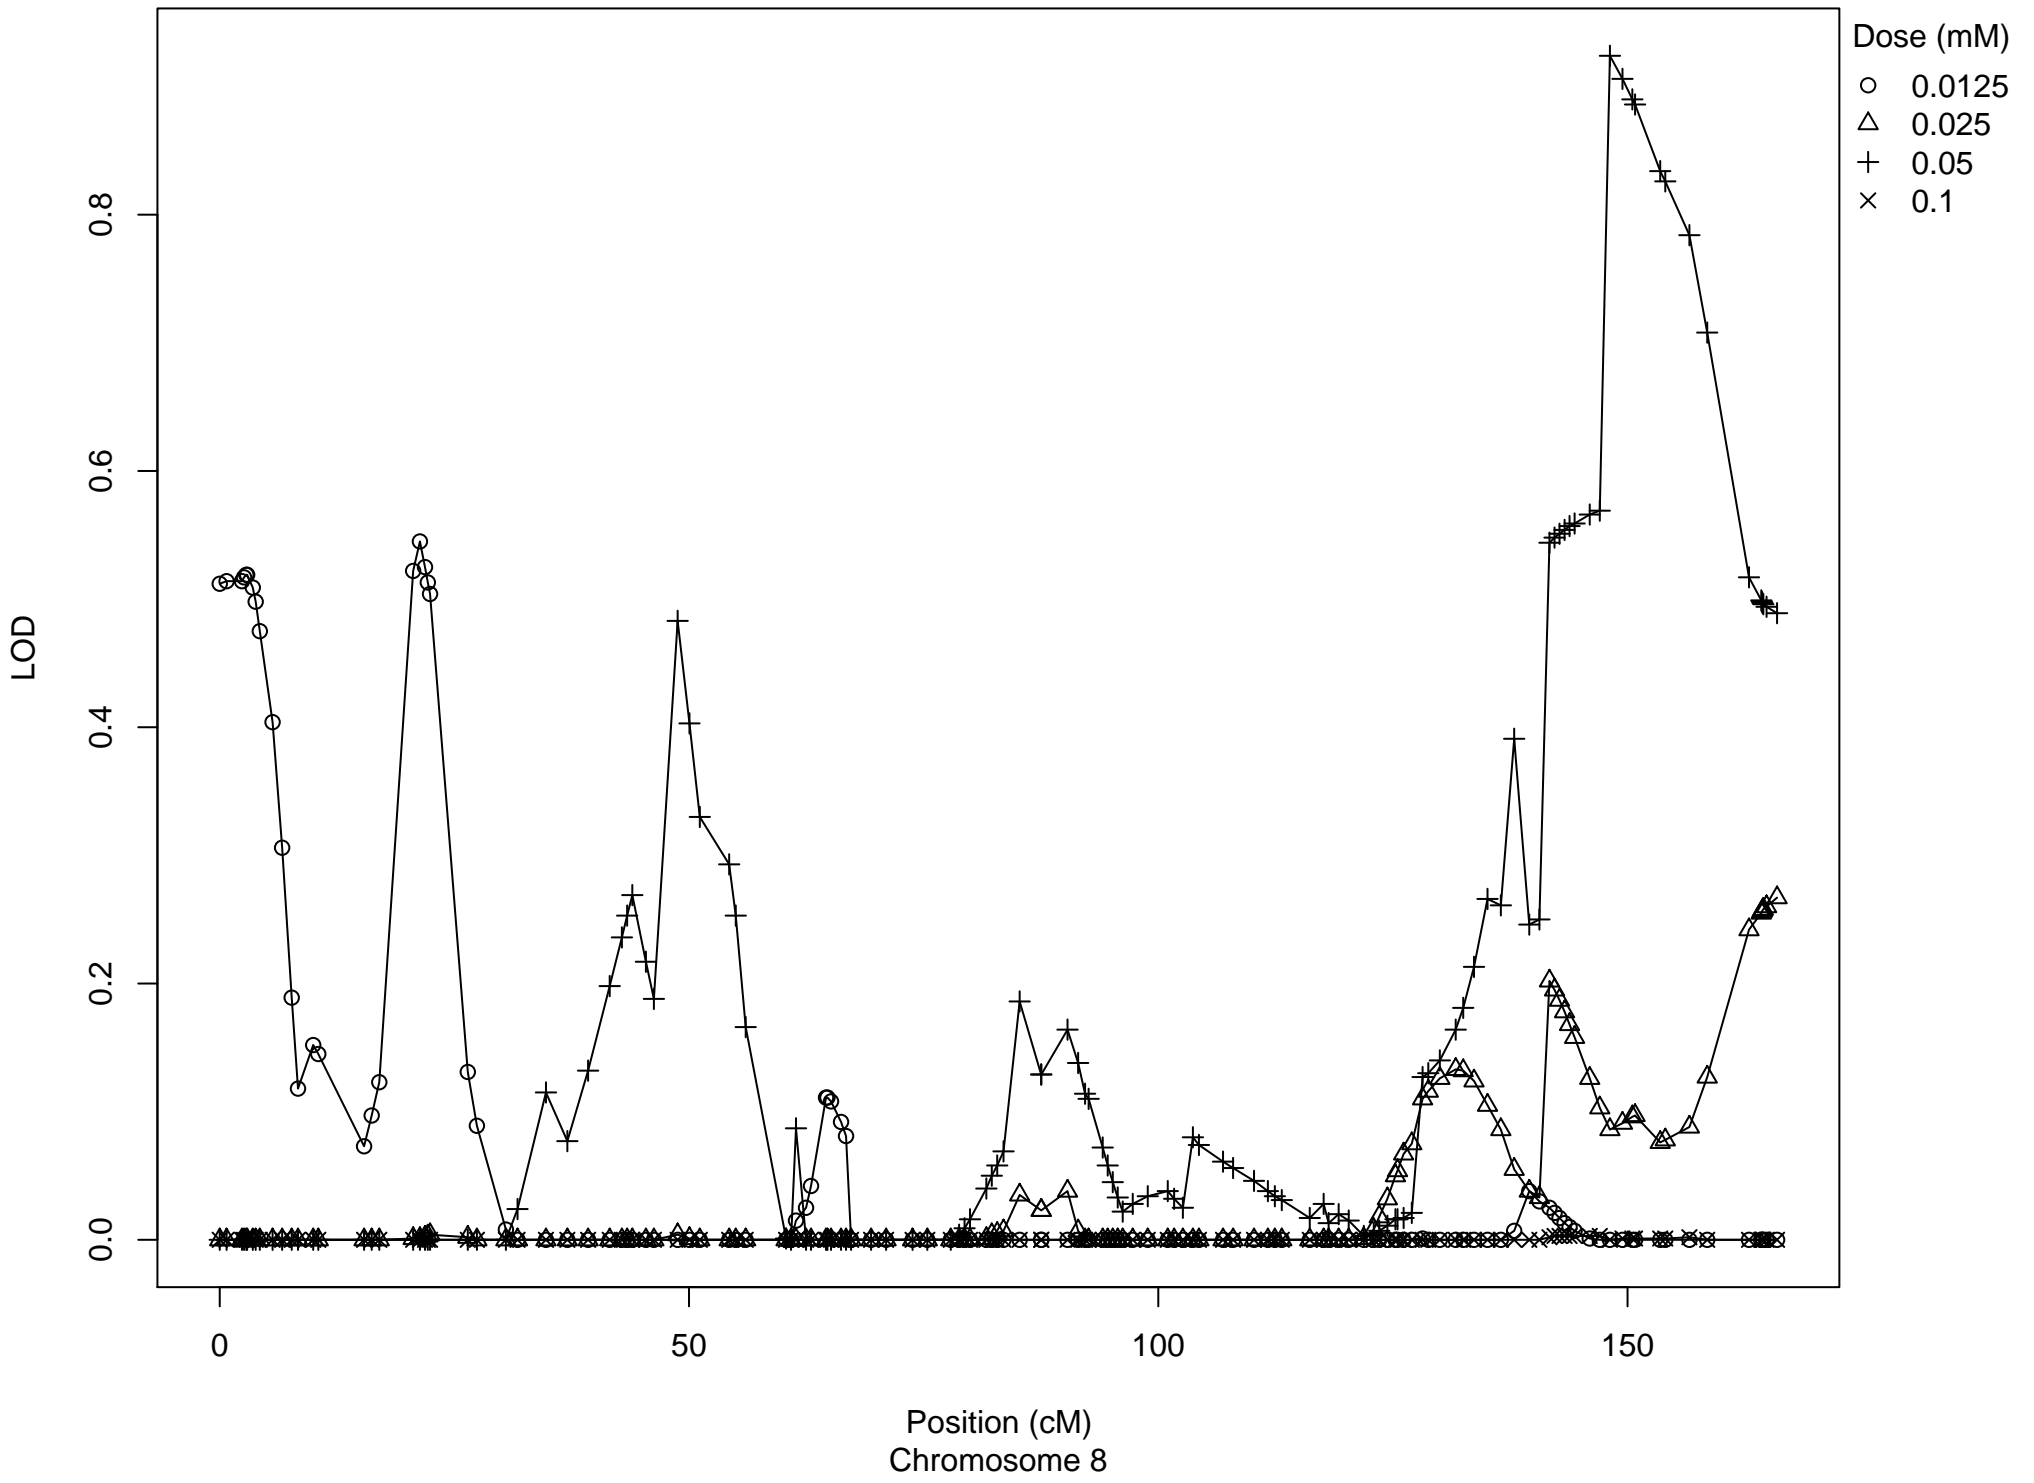

# Busulfan (Busulf)

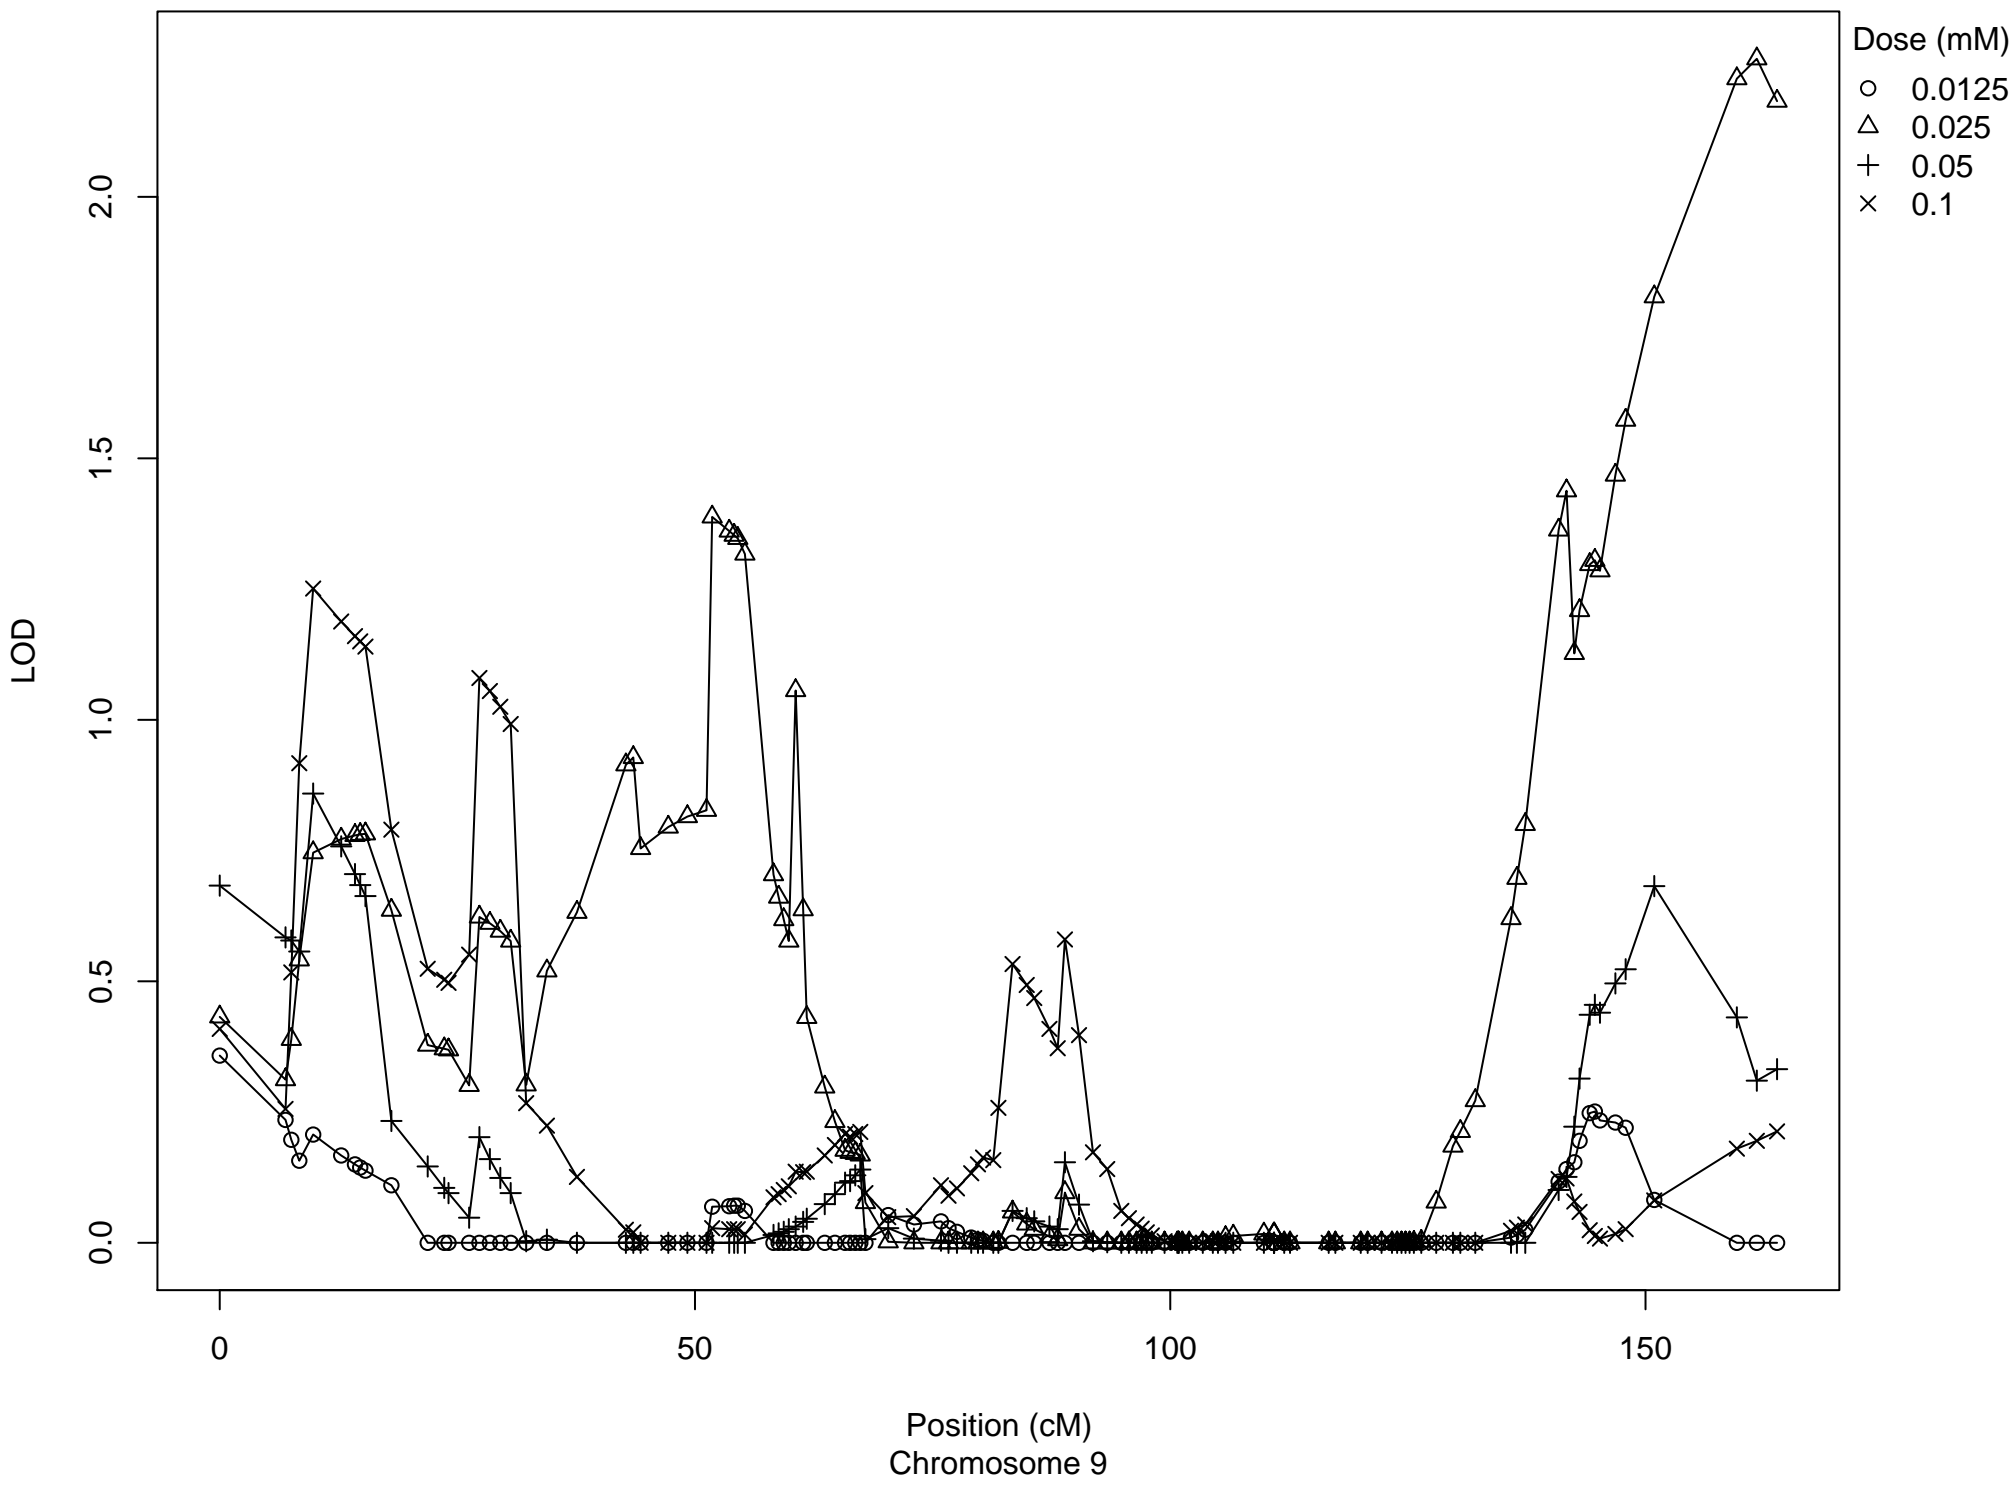

# Busulfan (Busulf)

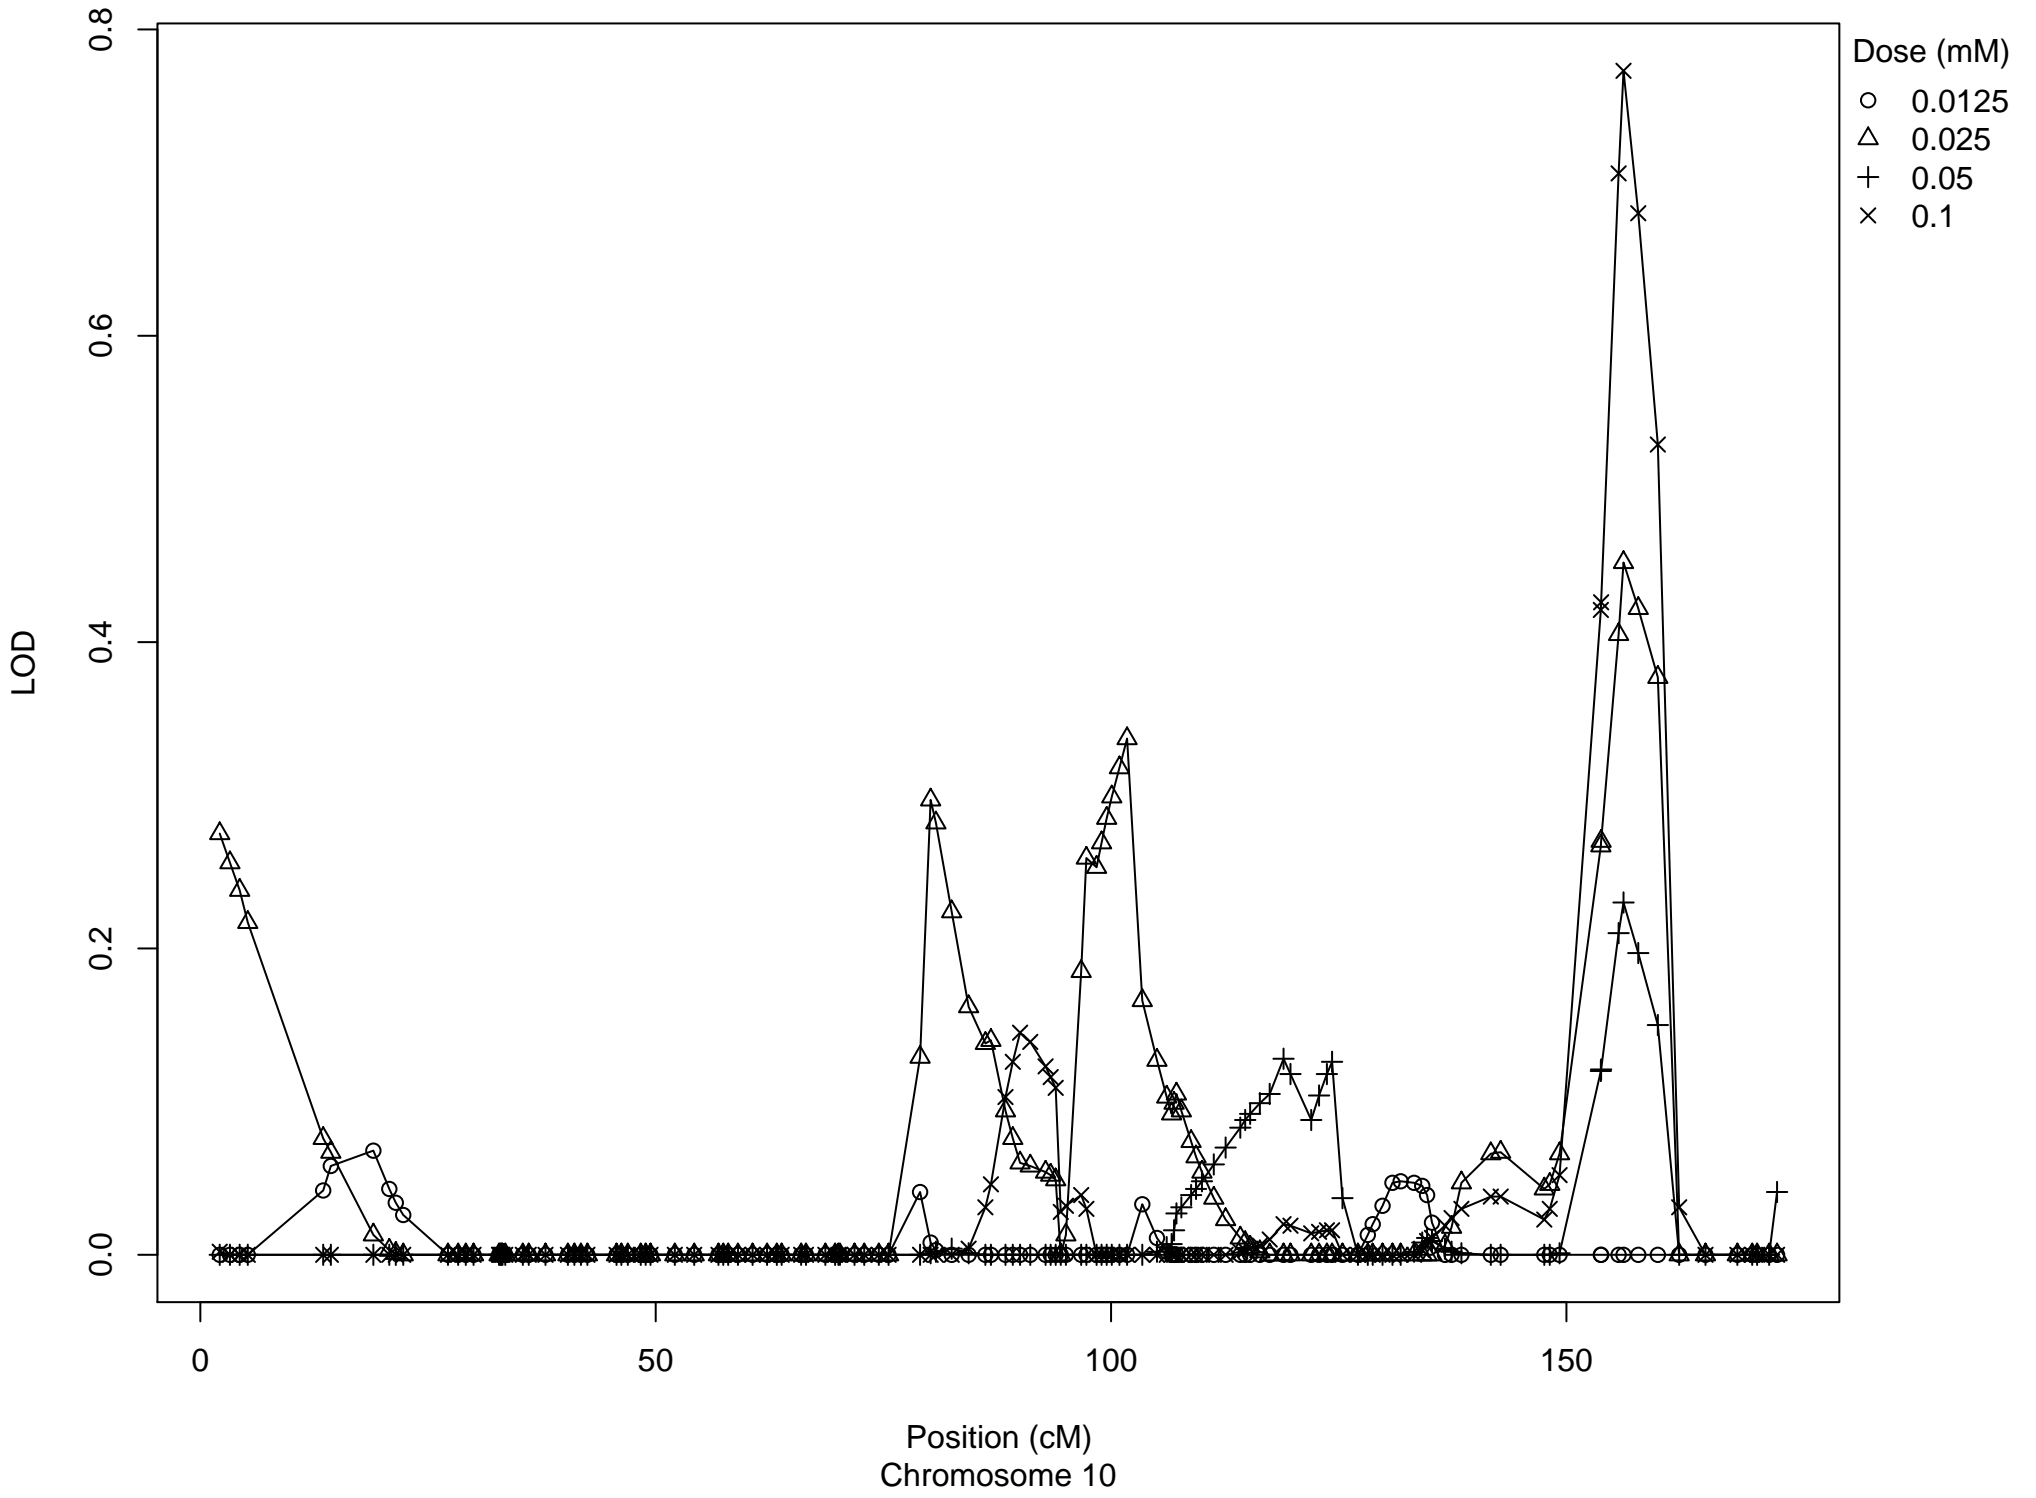

# Busulfan (Busulf)

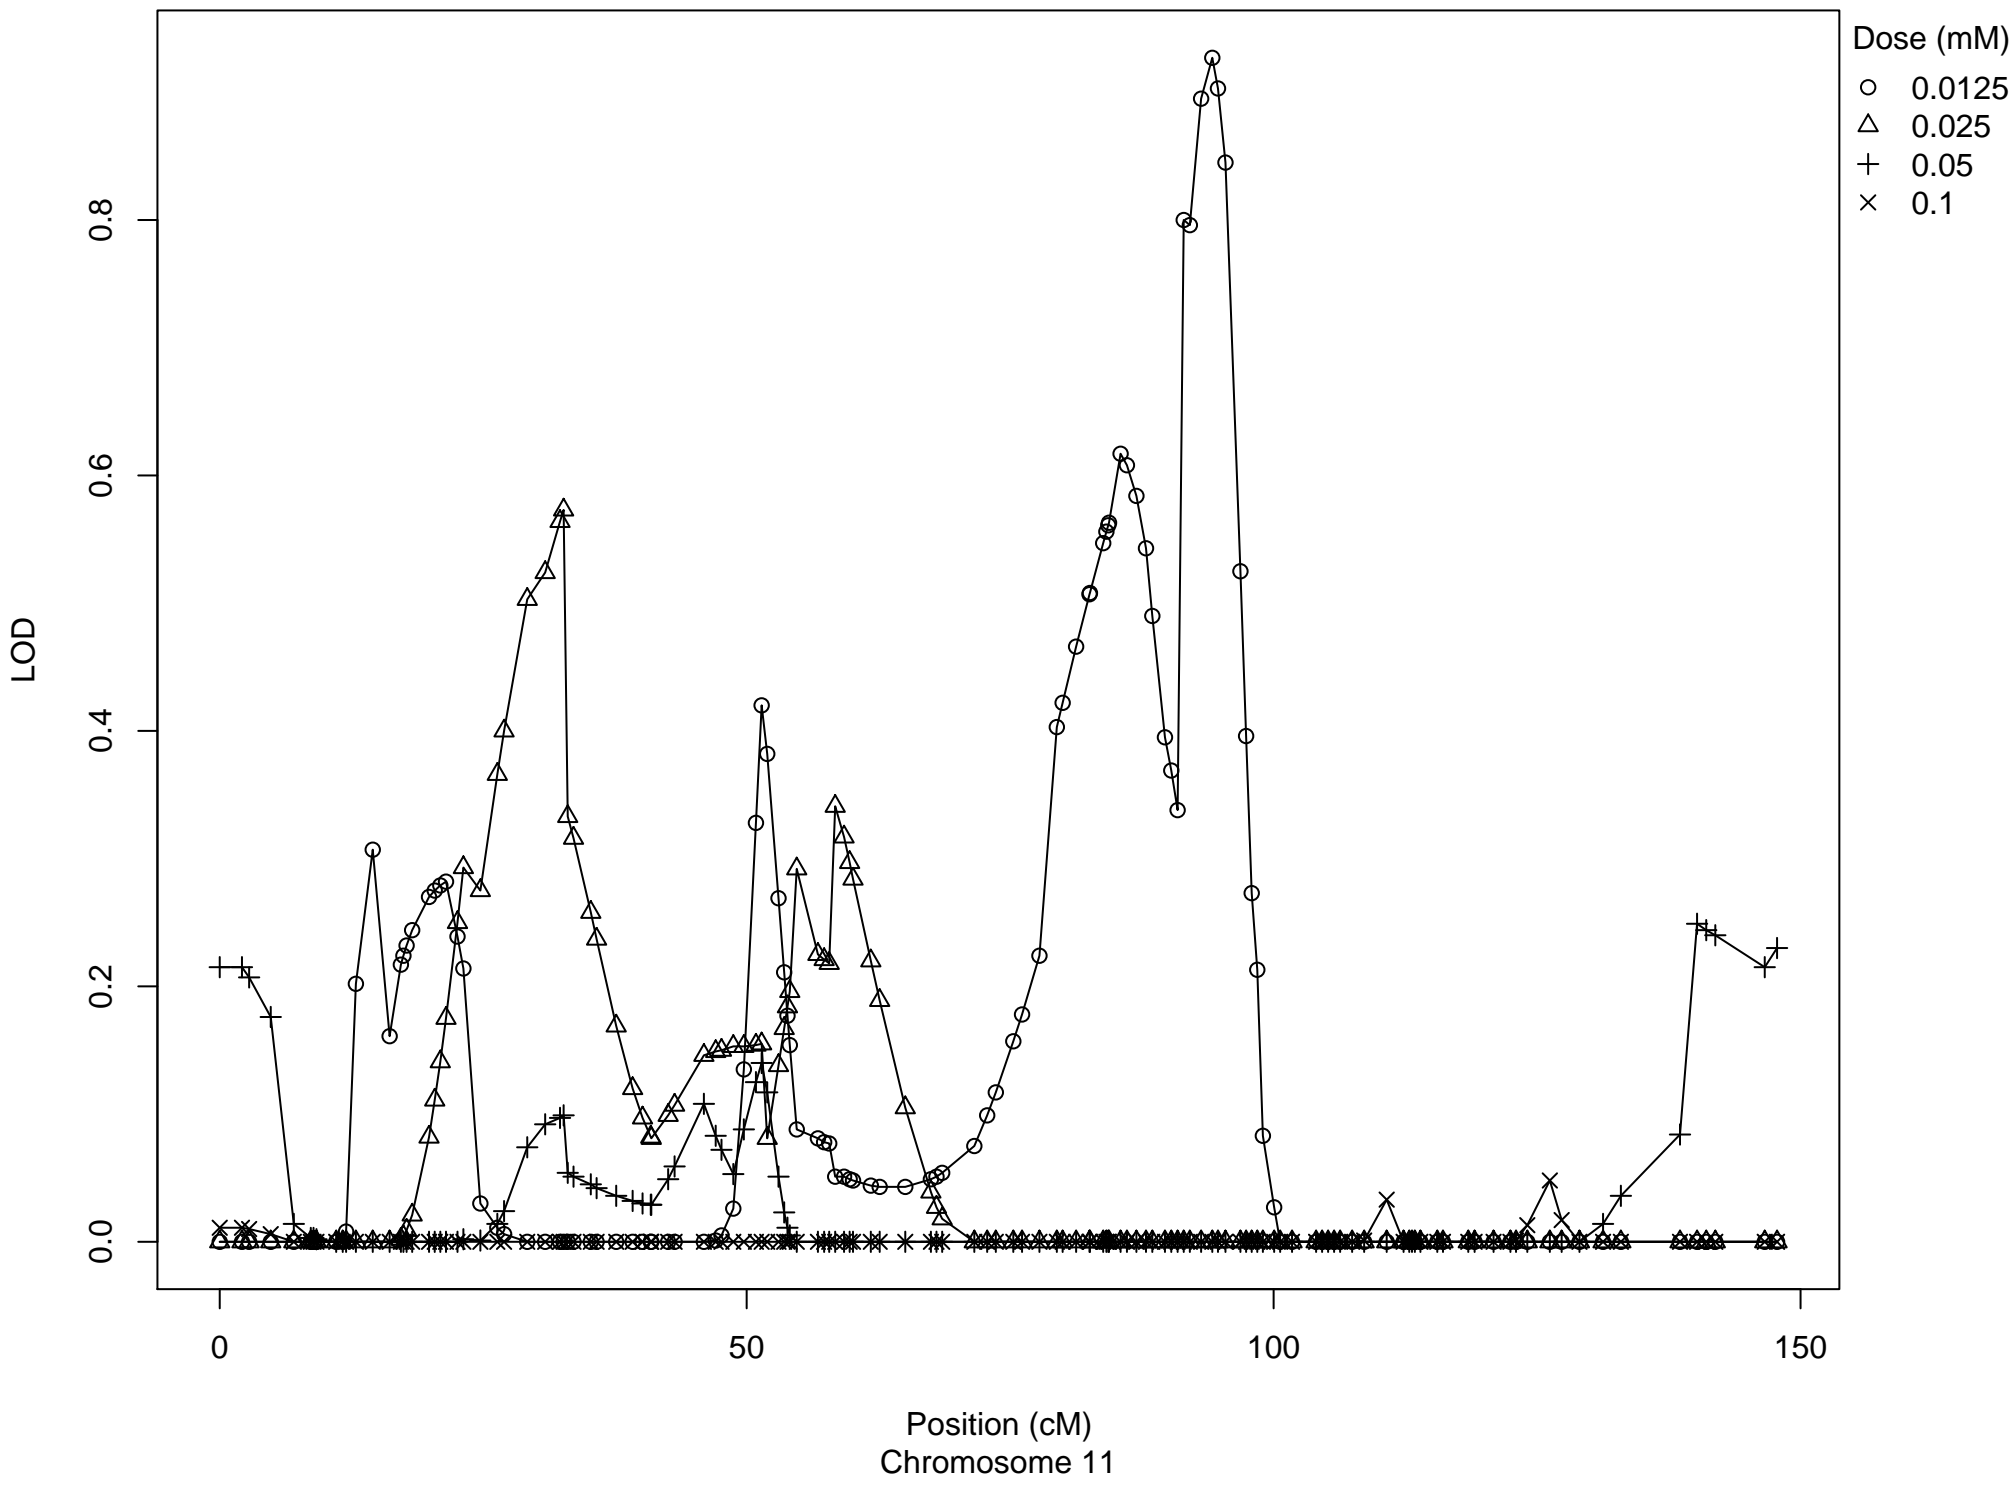

# Busulfan (Busulf)

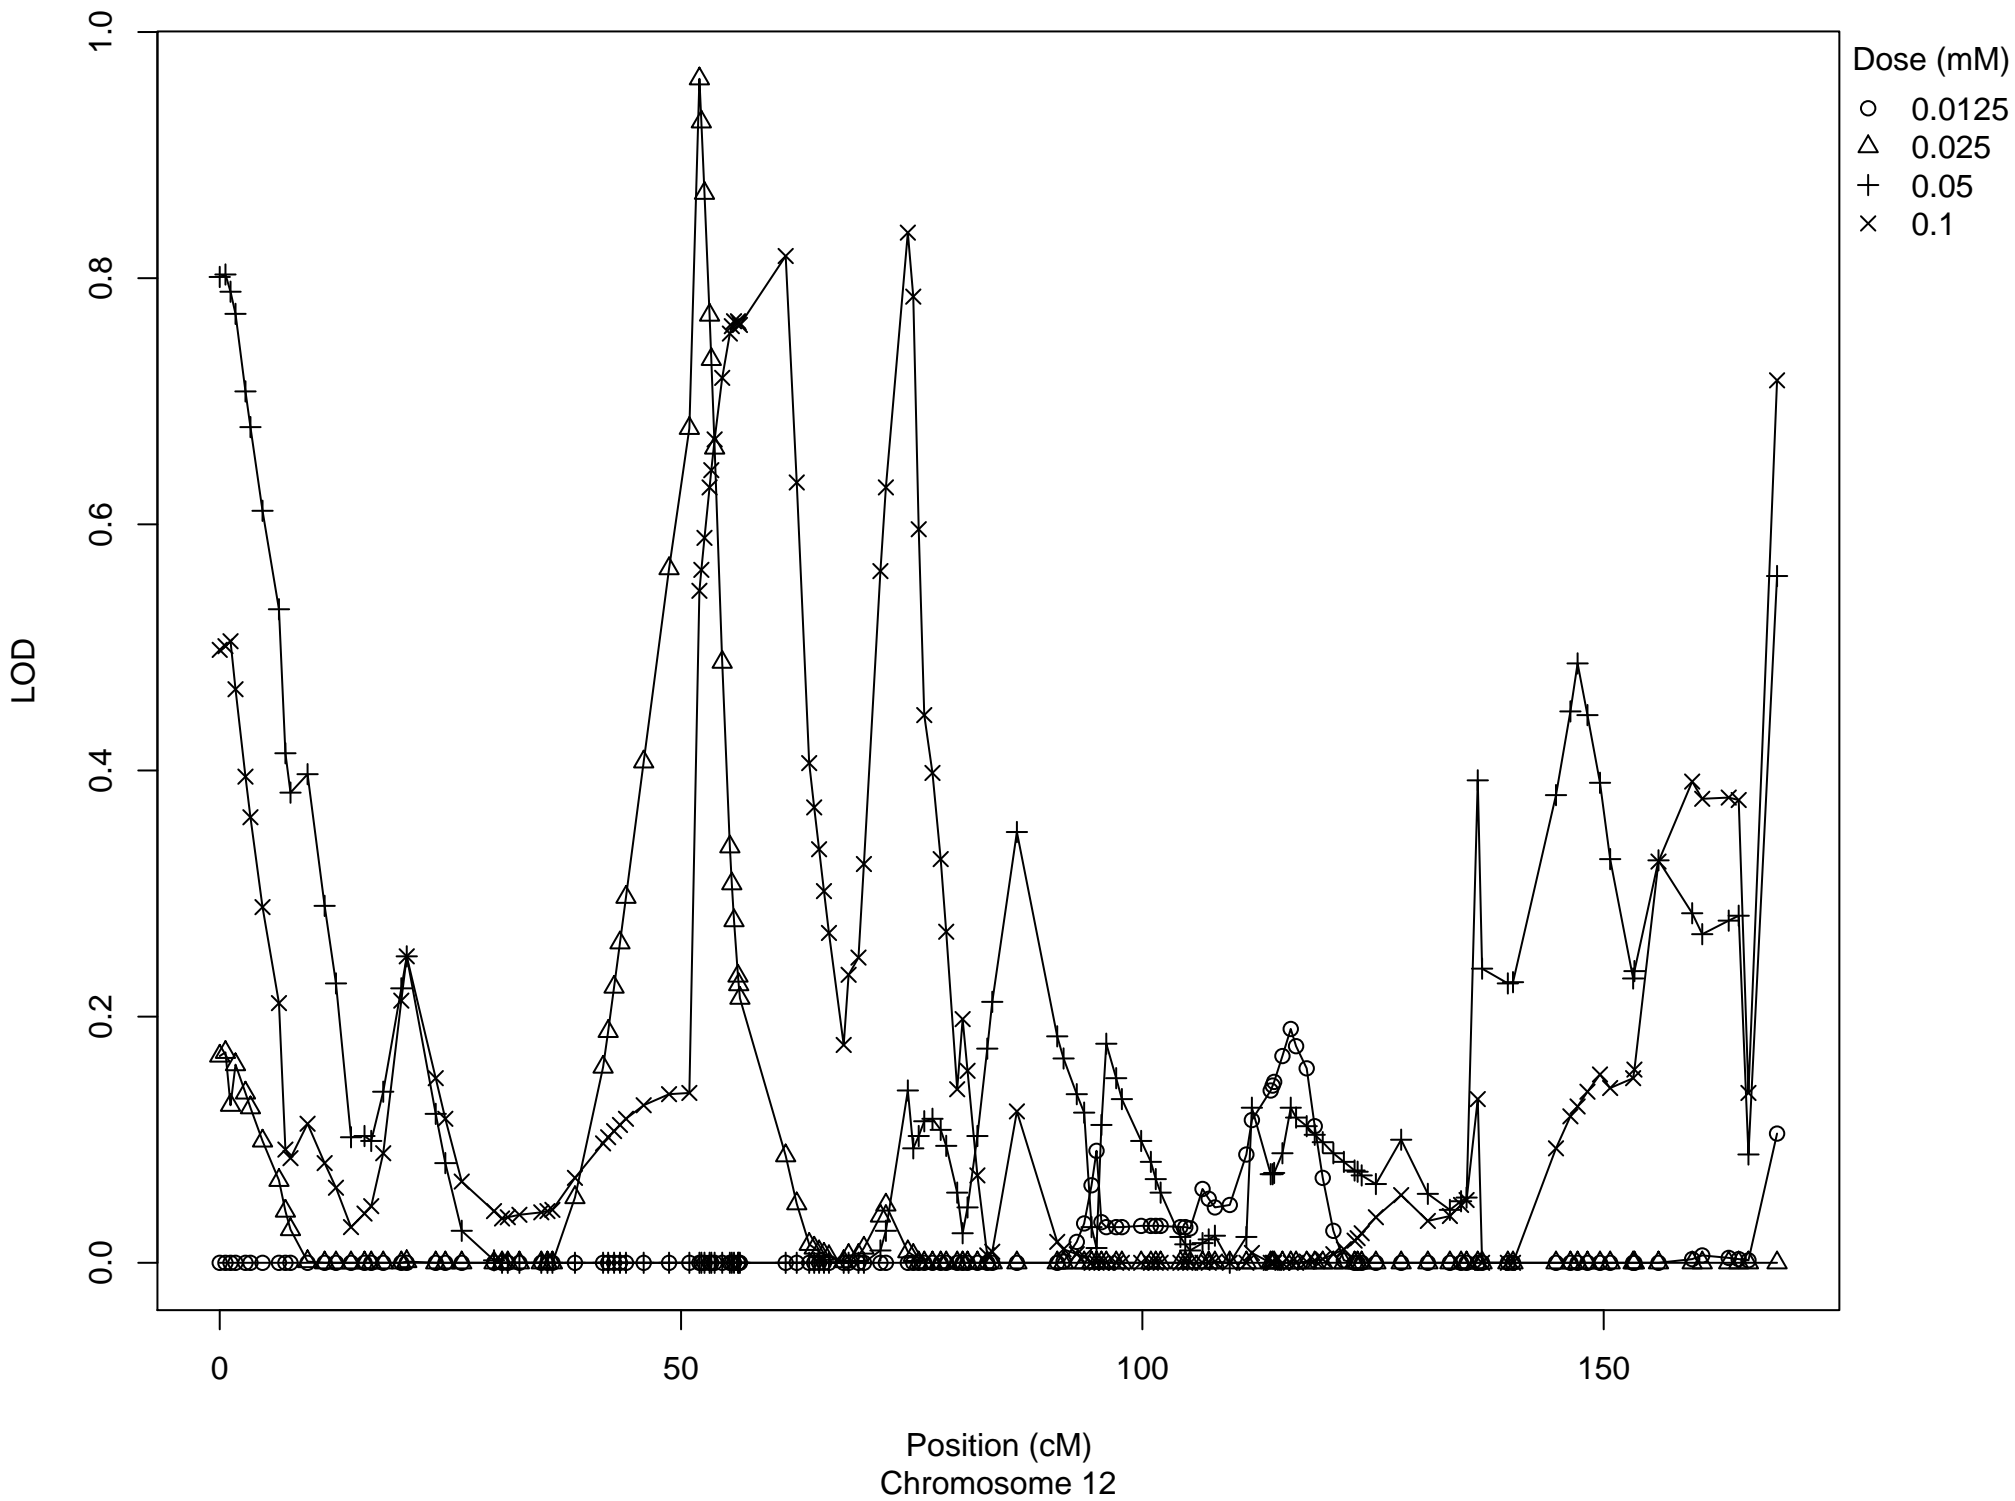

# Busulfan (Busulf)

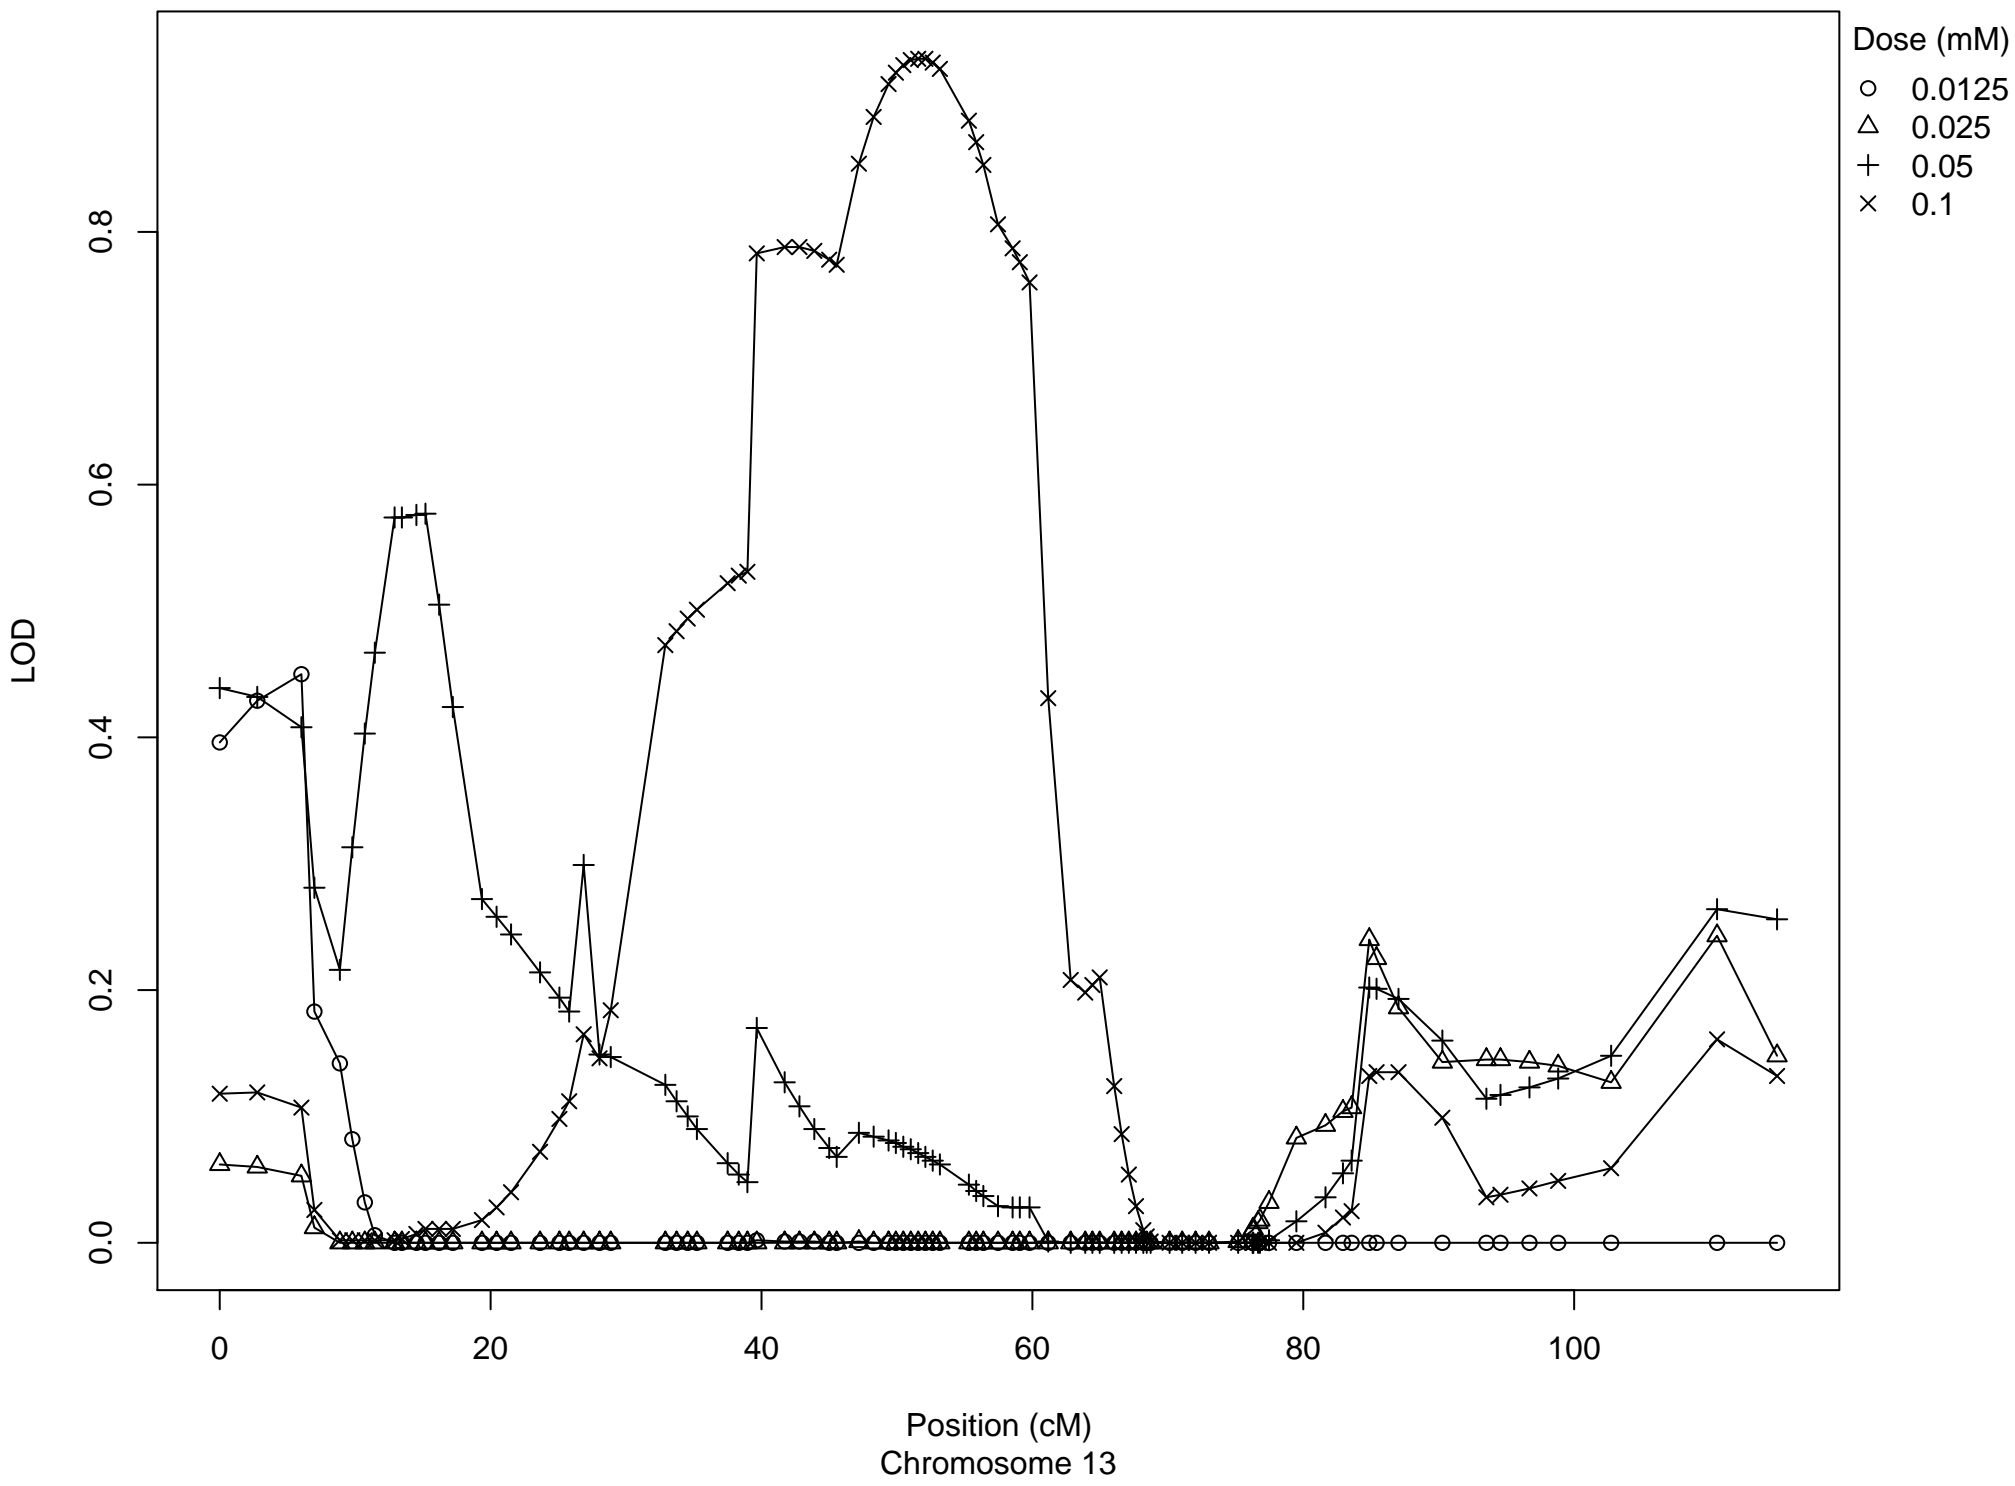

# Busulfan (Busulf)

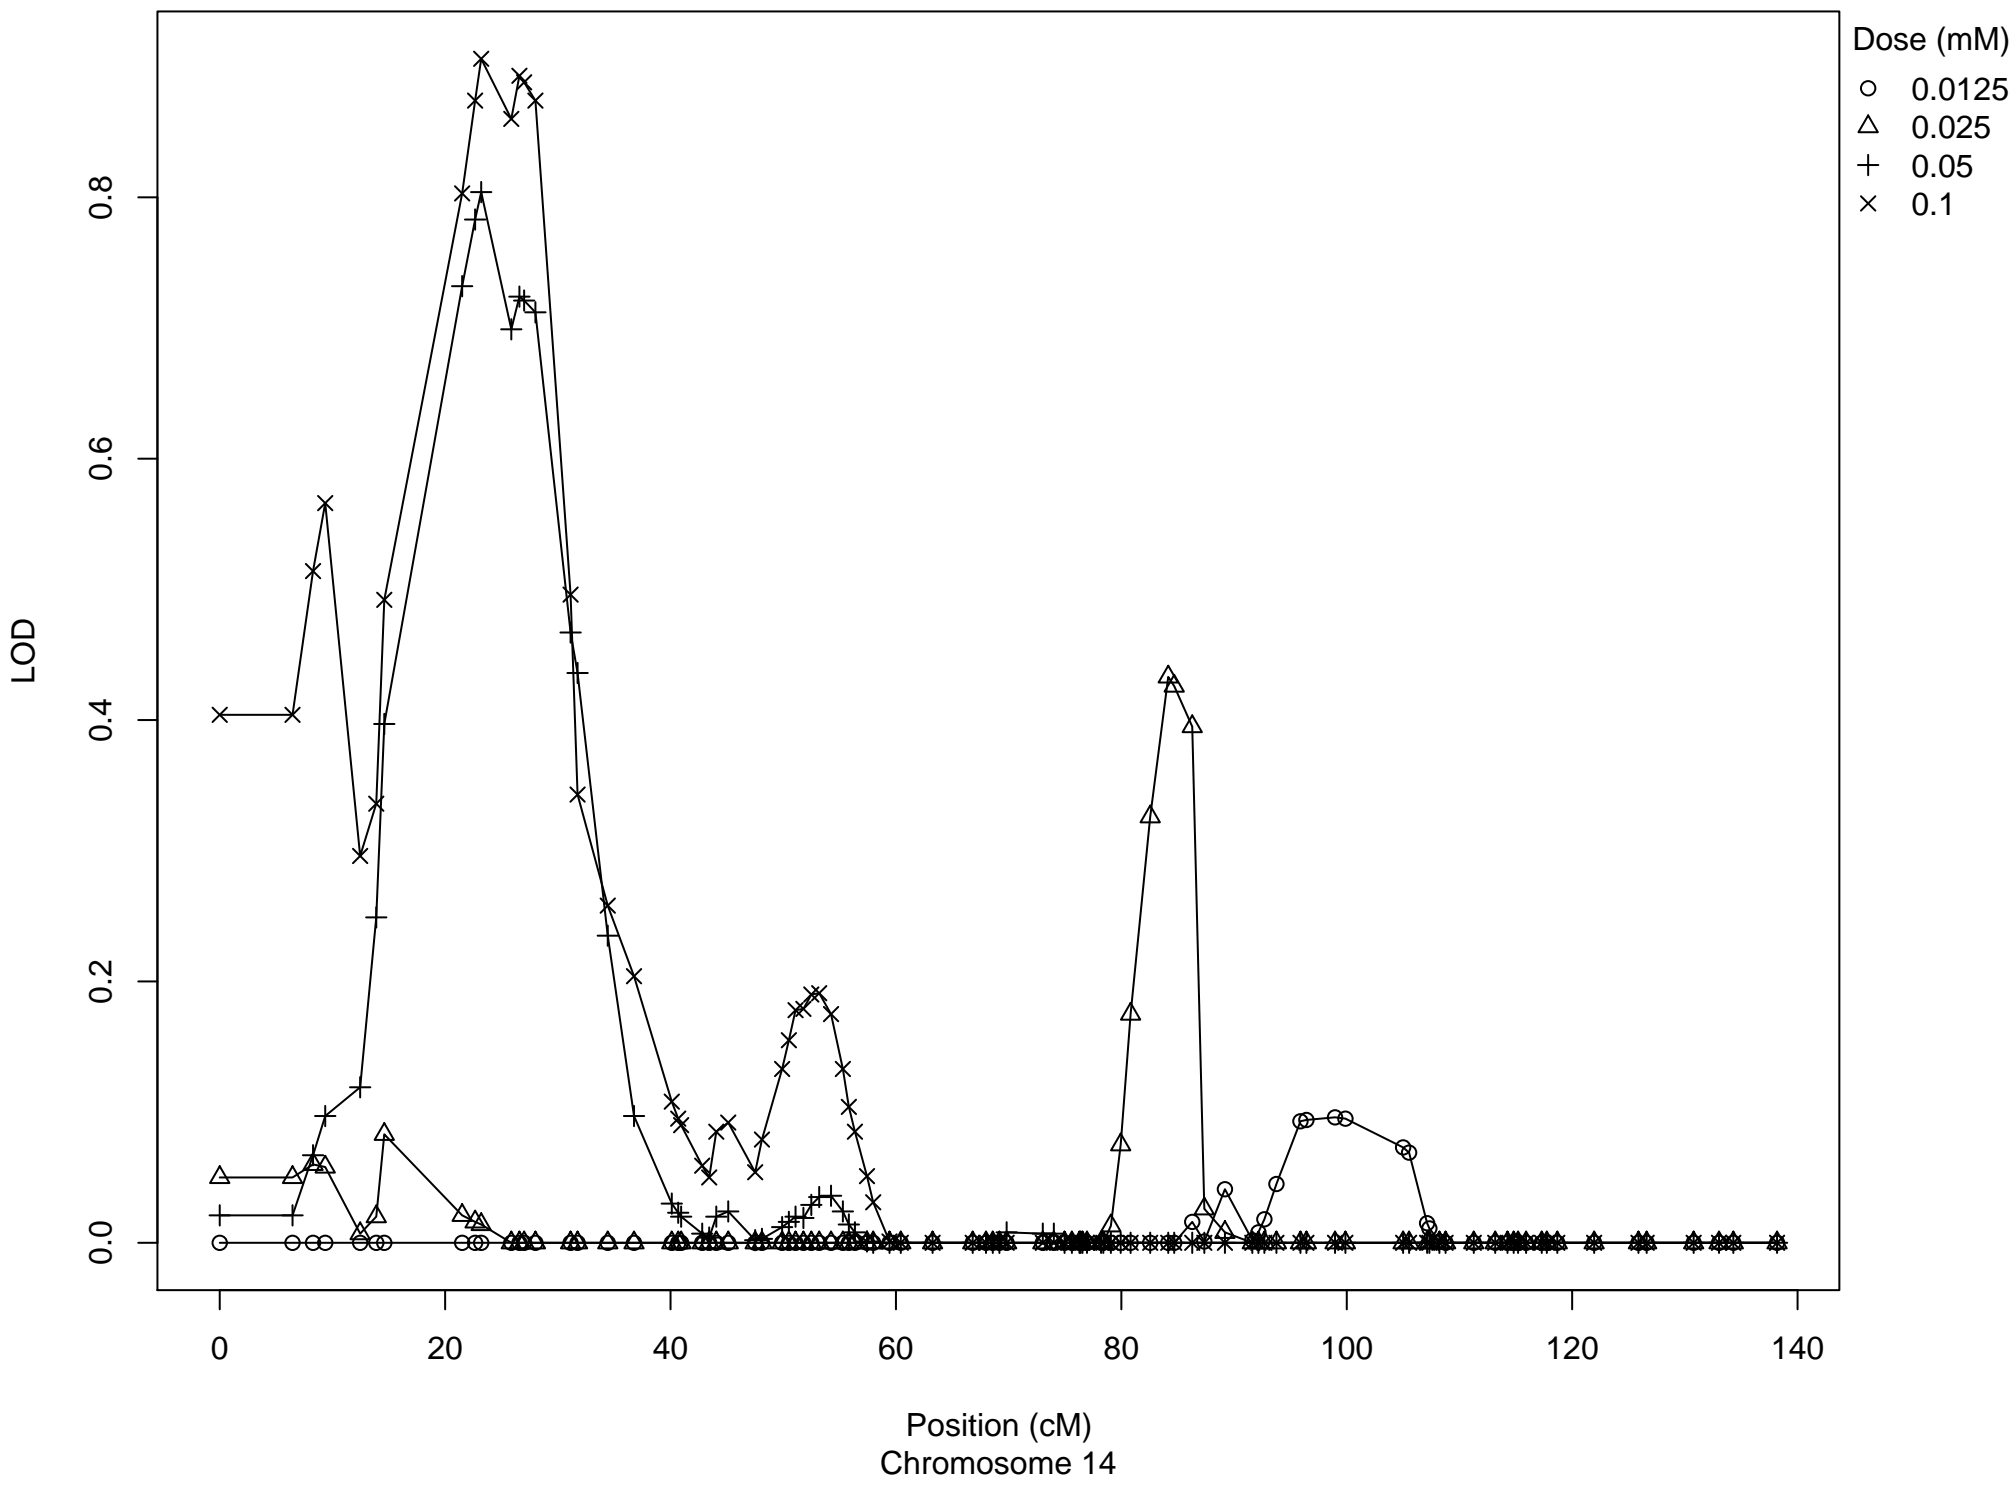



# Busulfan (Busulf)

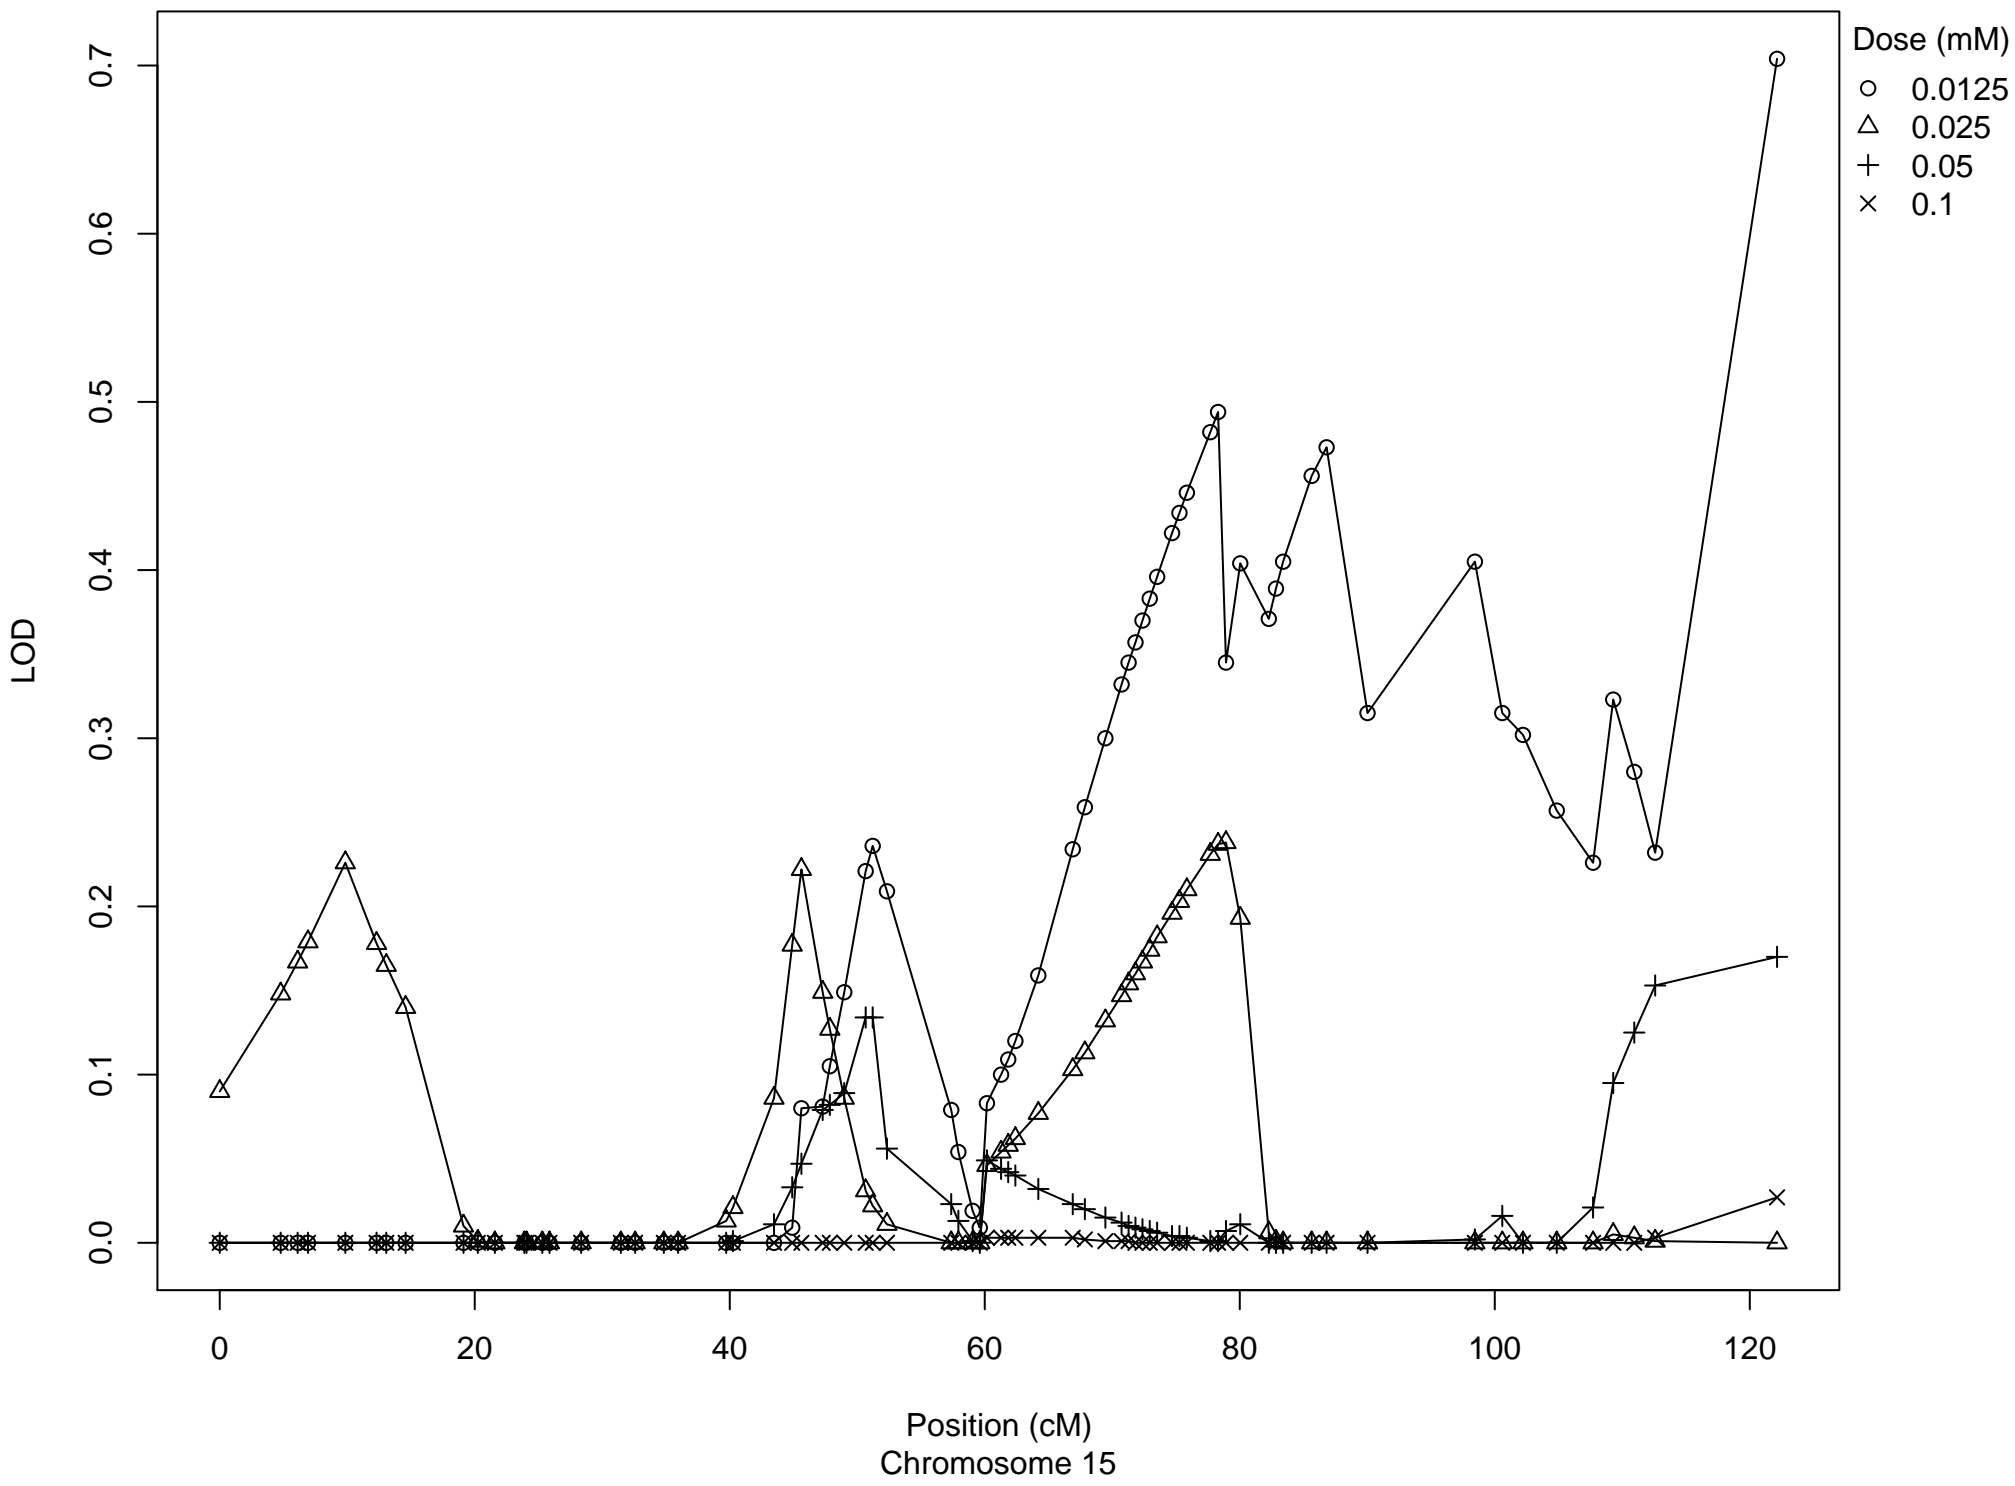

# Busulfan (Busulf)

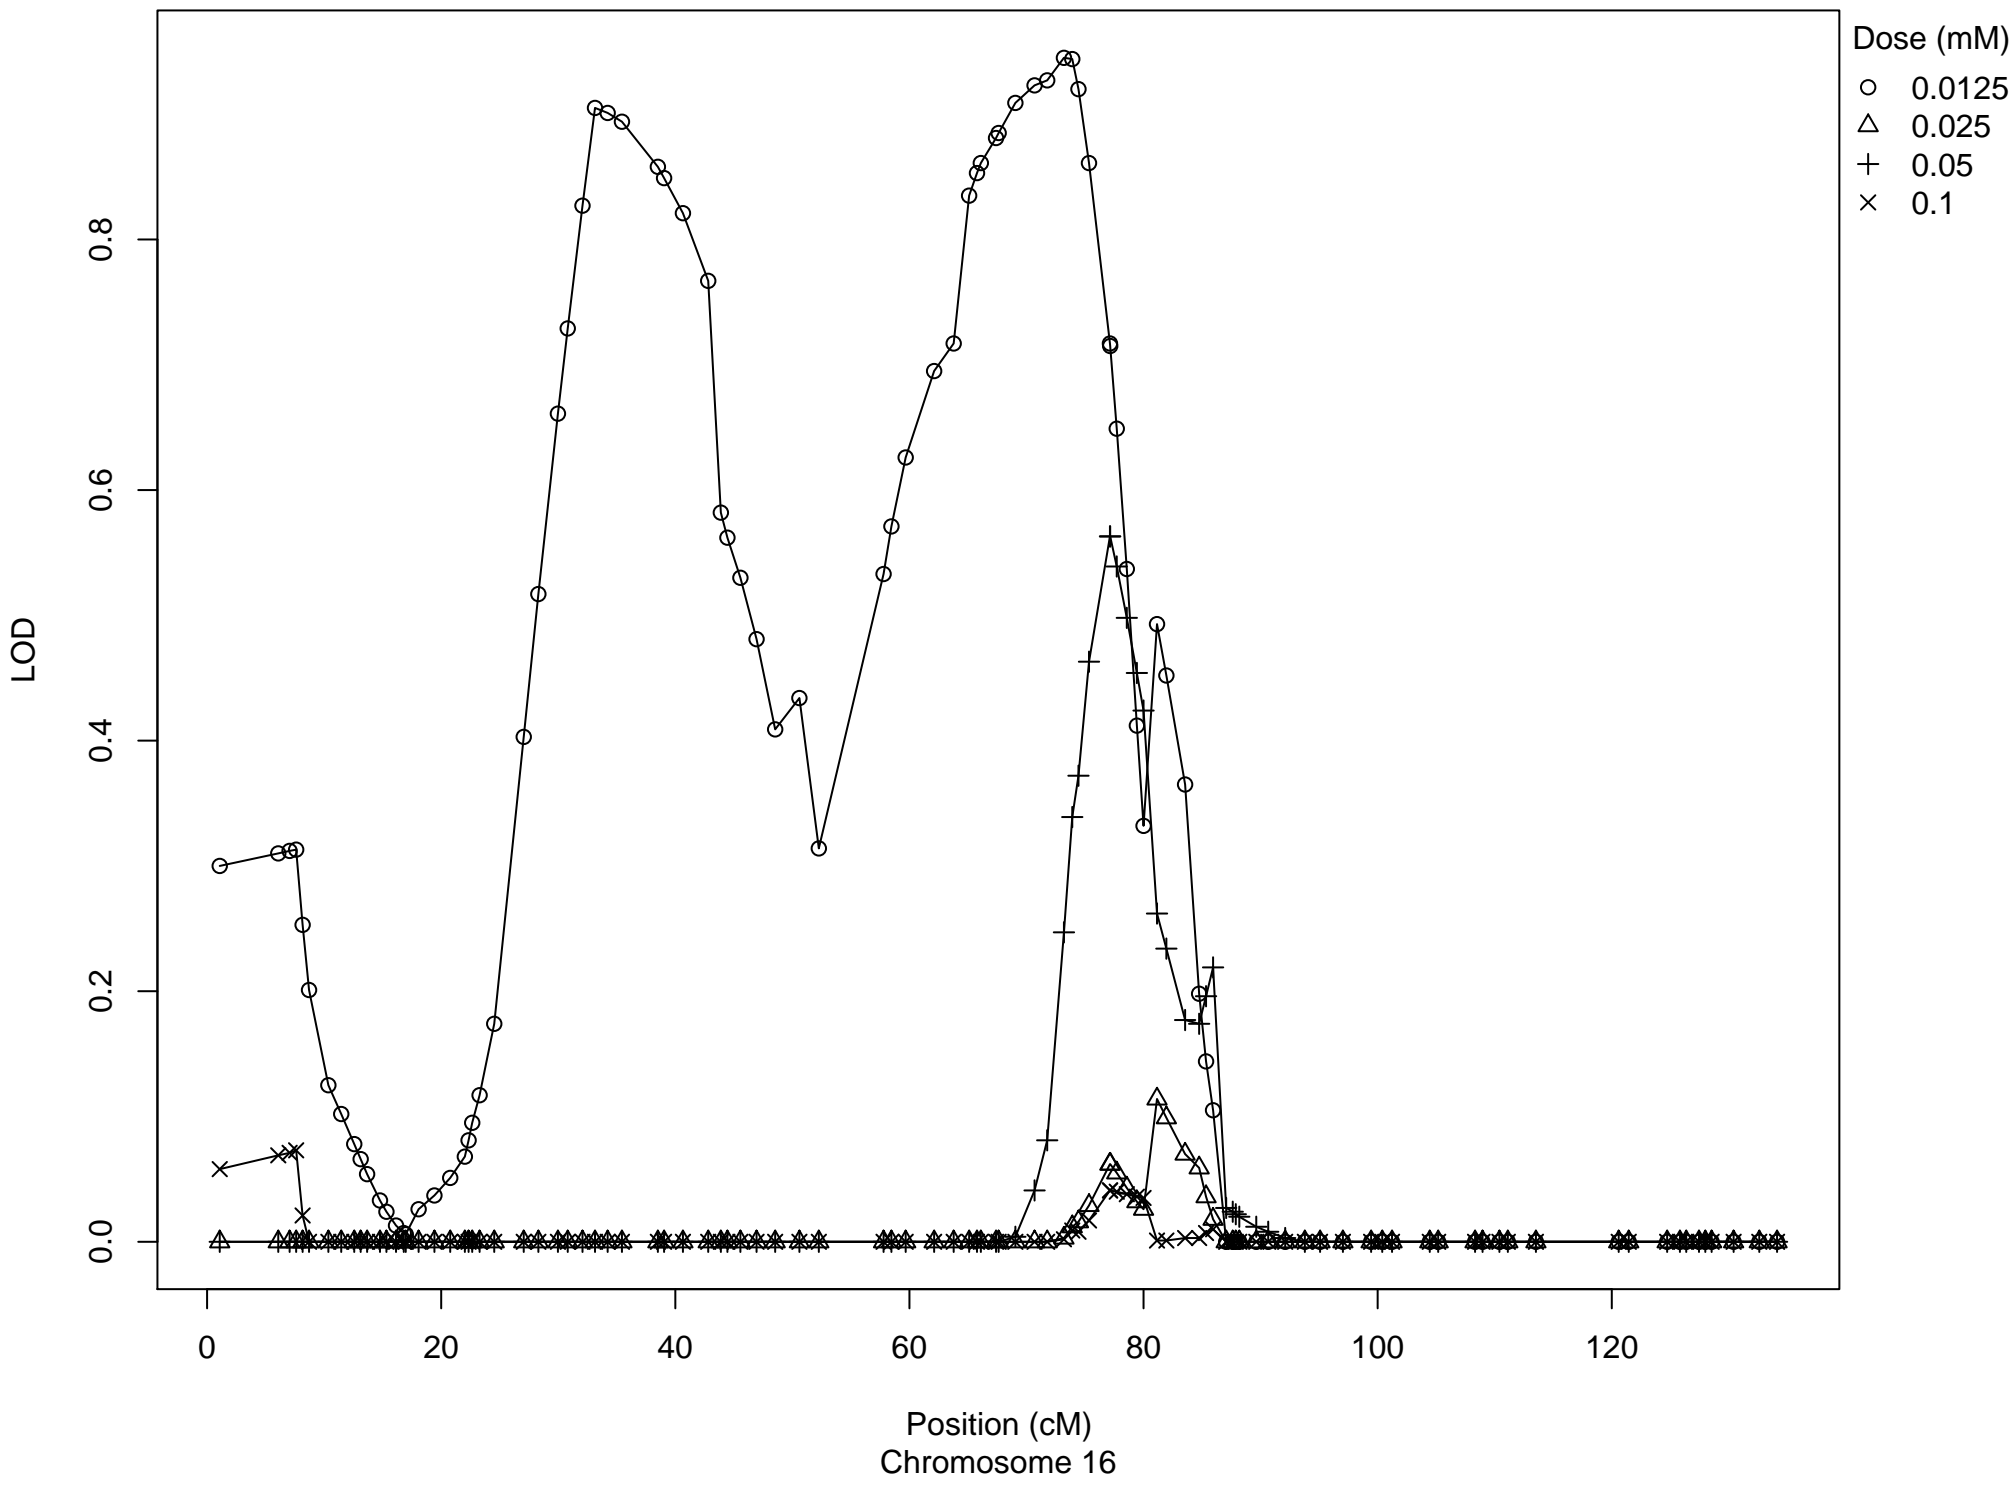

# Busulfan (Busulf)

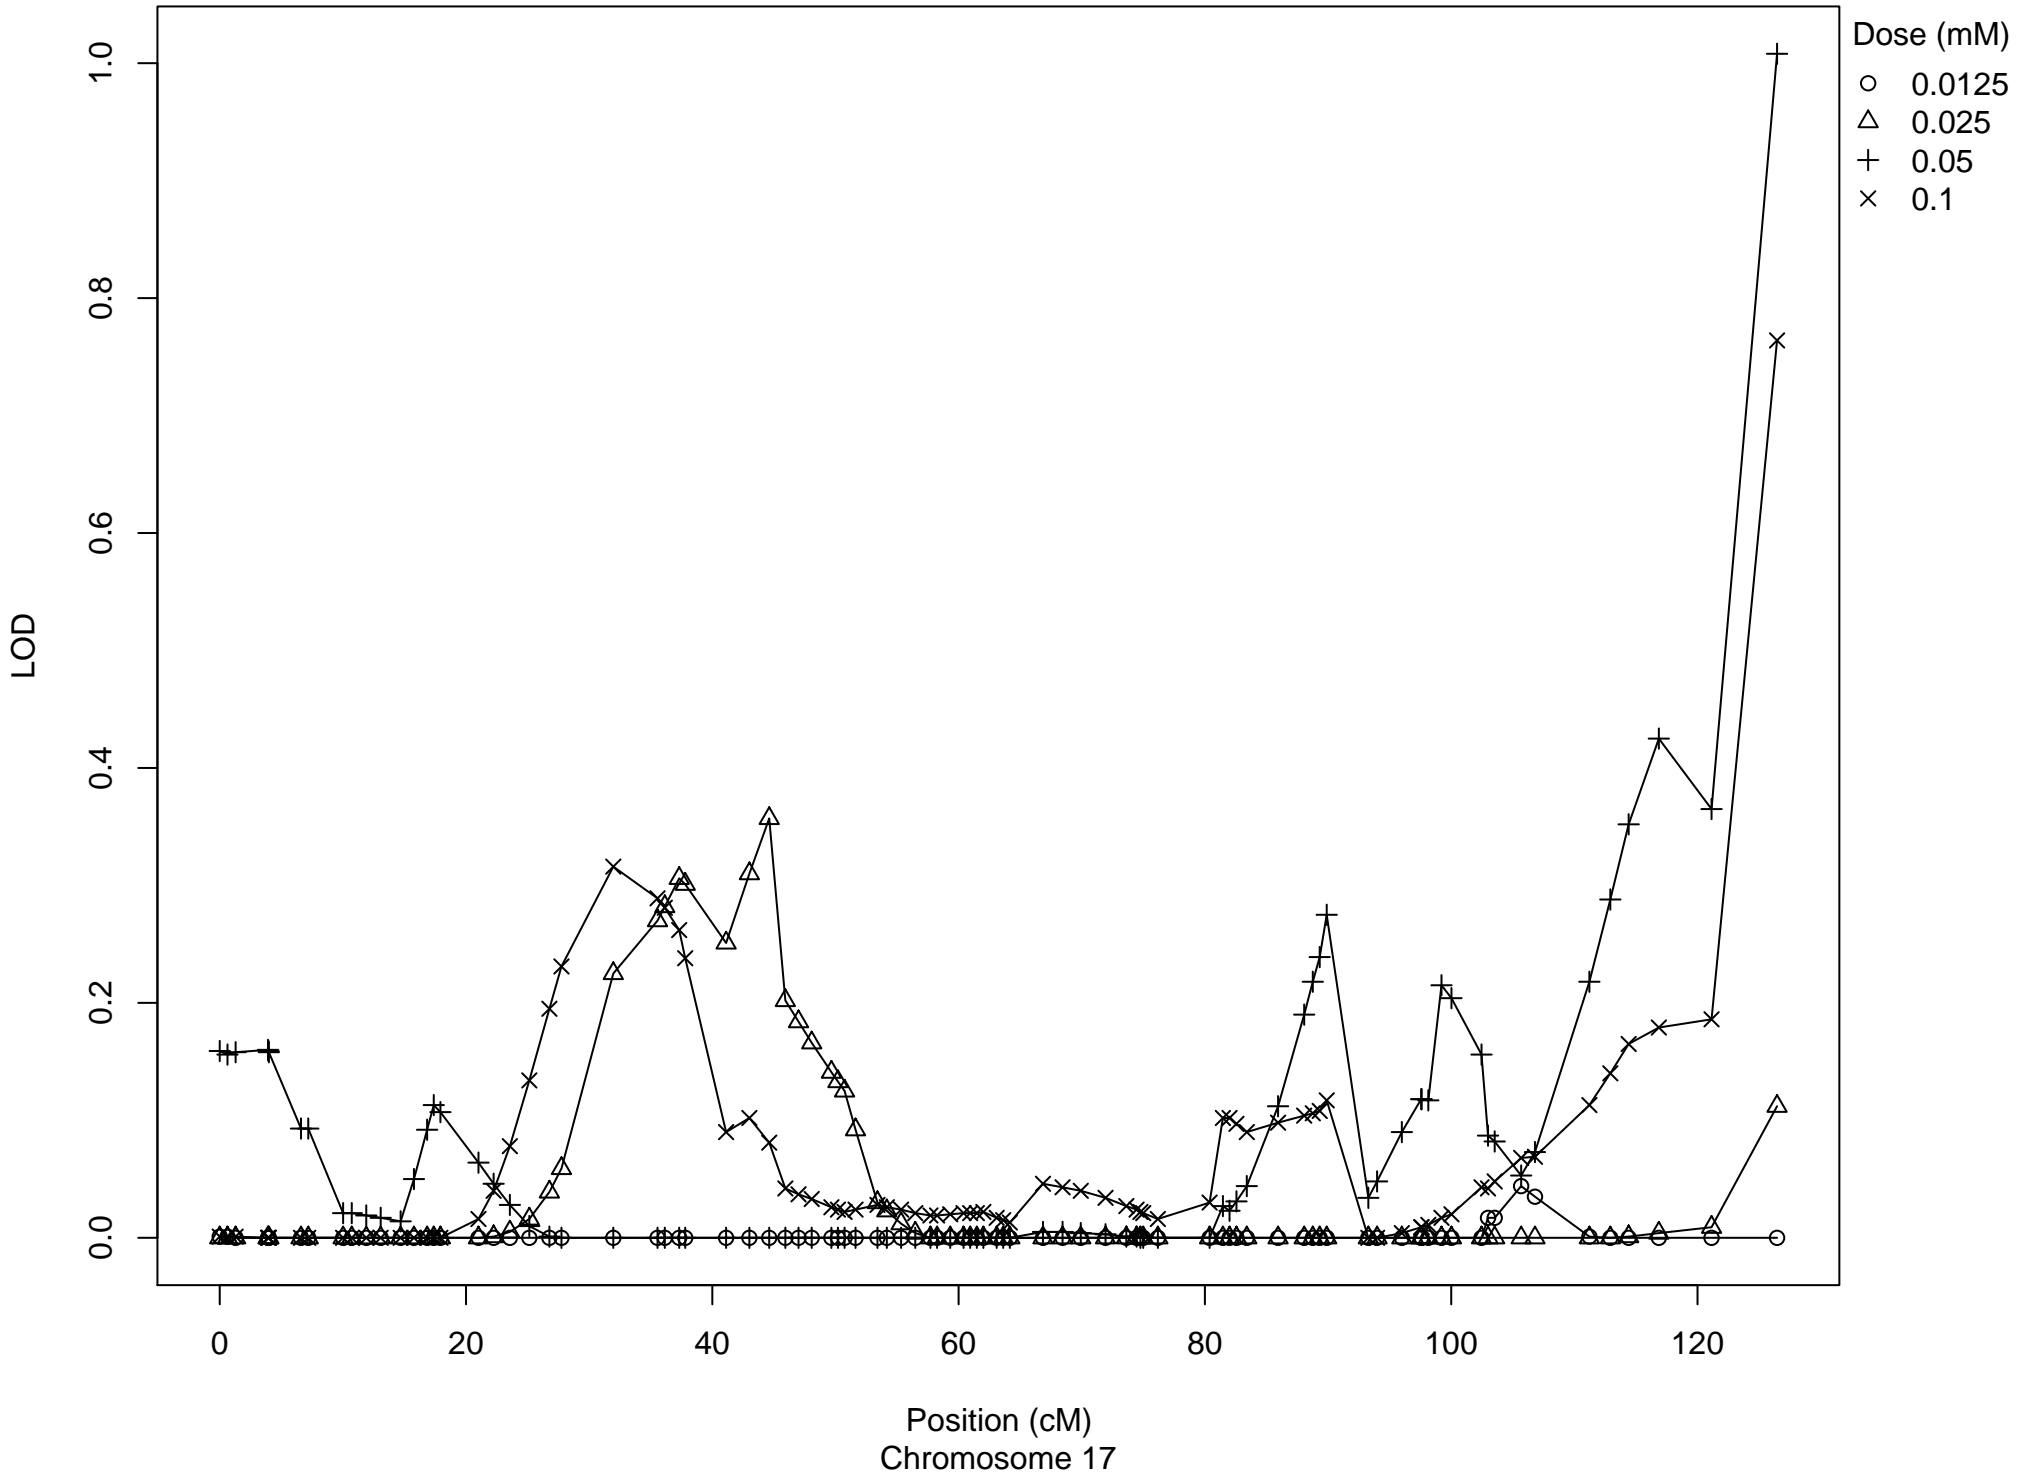

# Busulfan (Busulf)

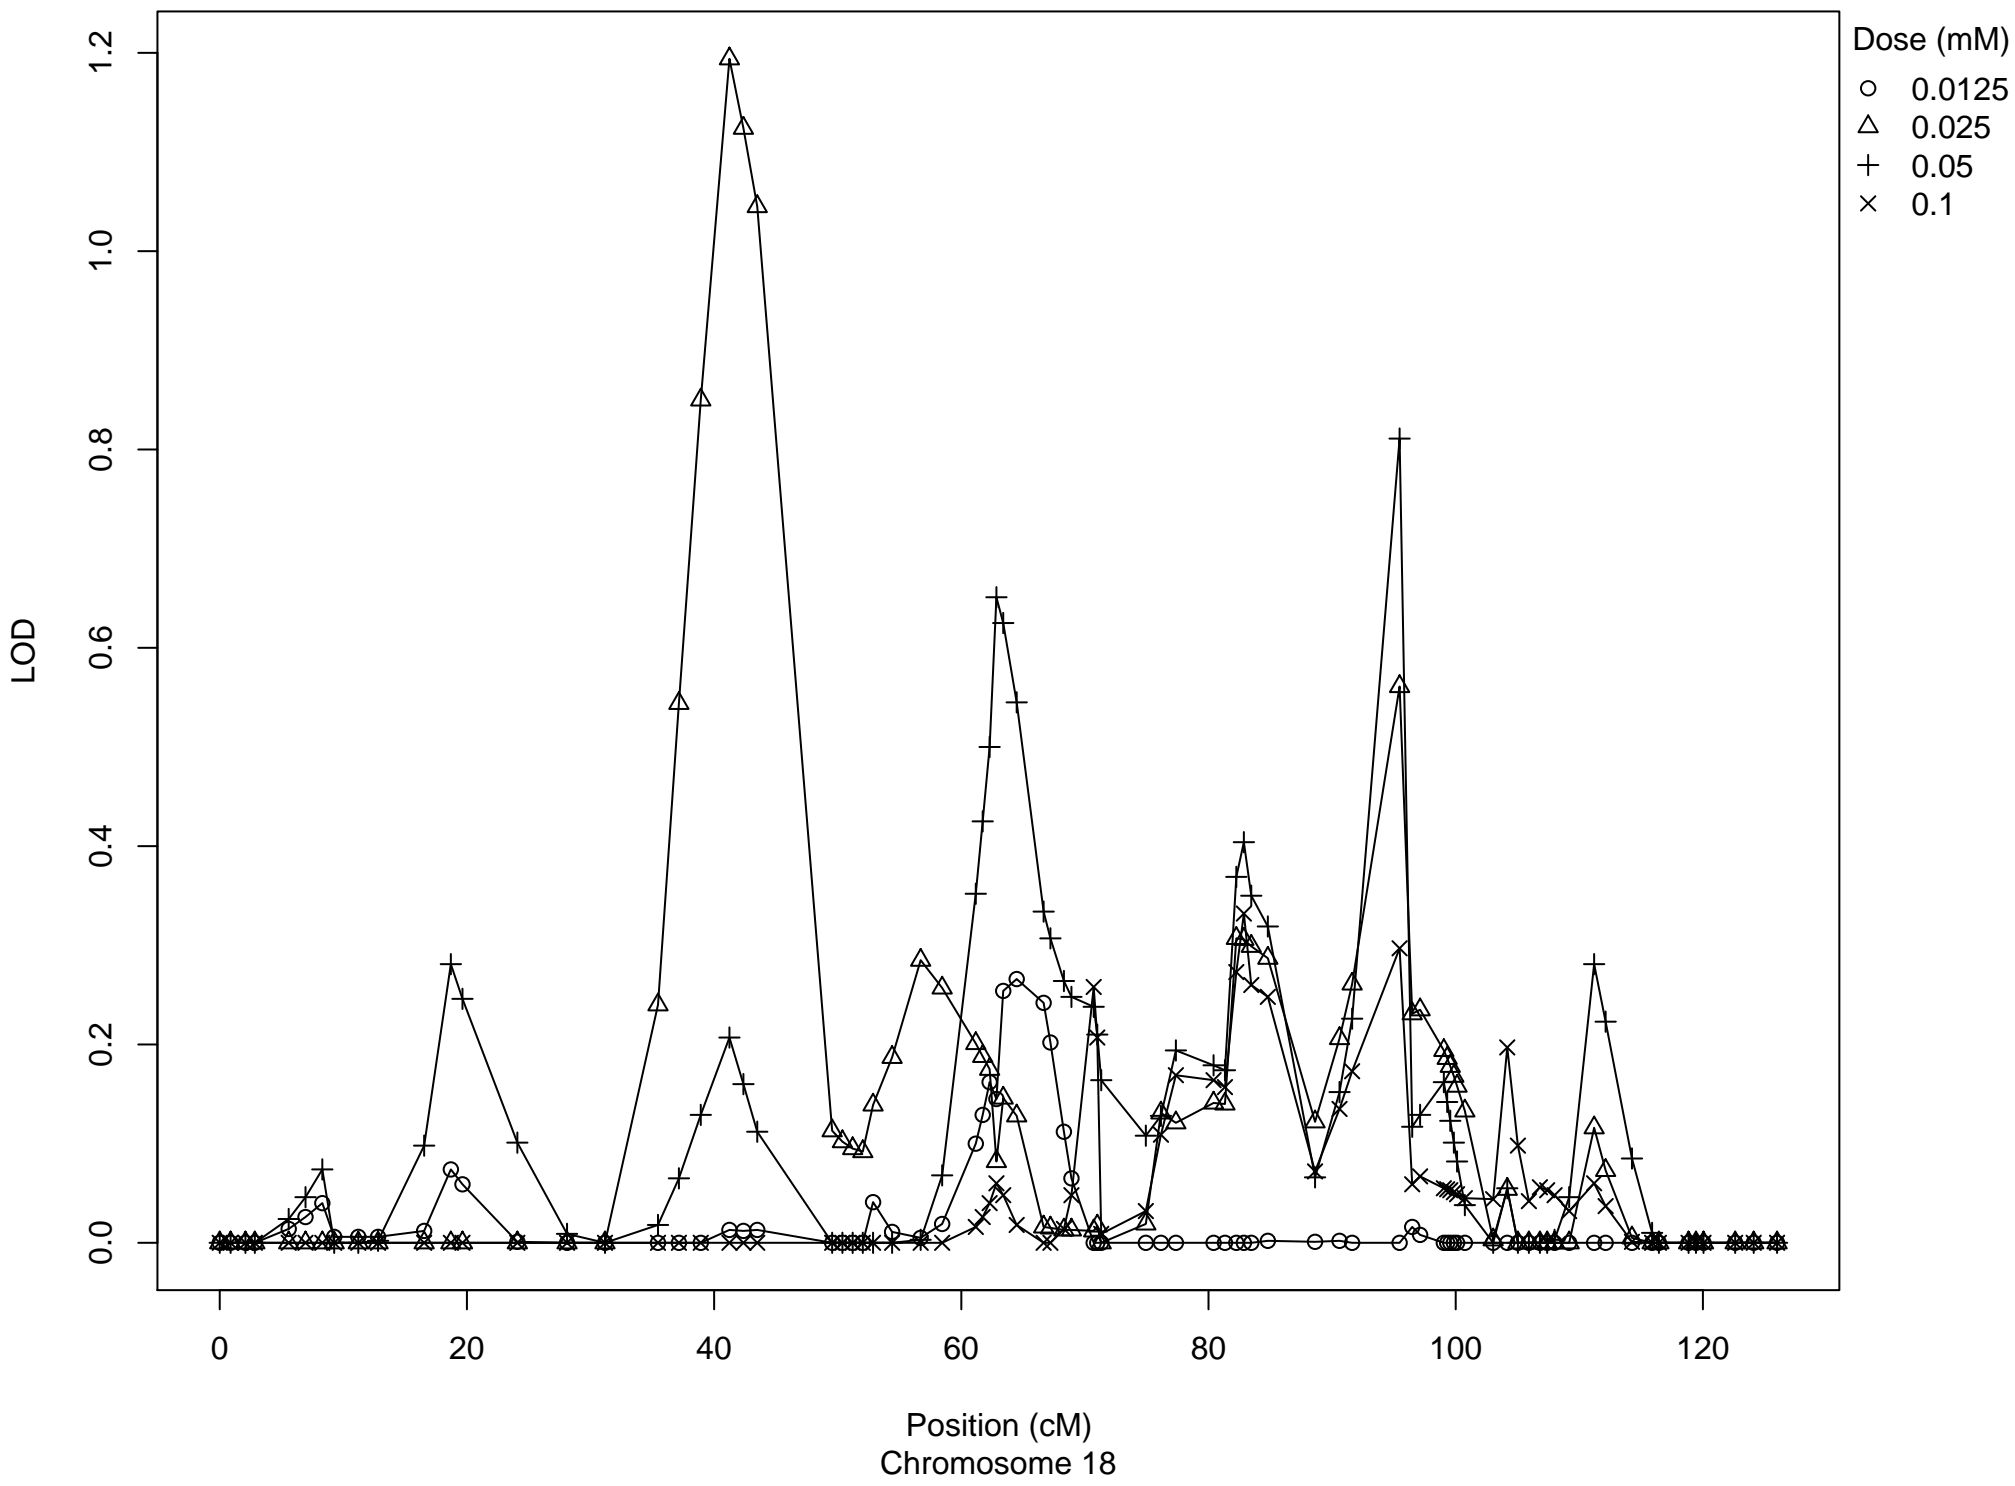

# Busulfan (Busulf)

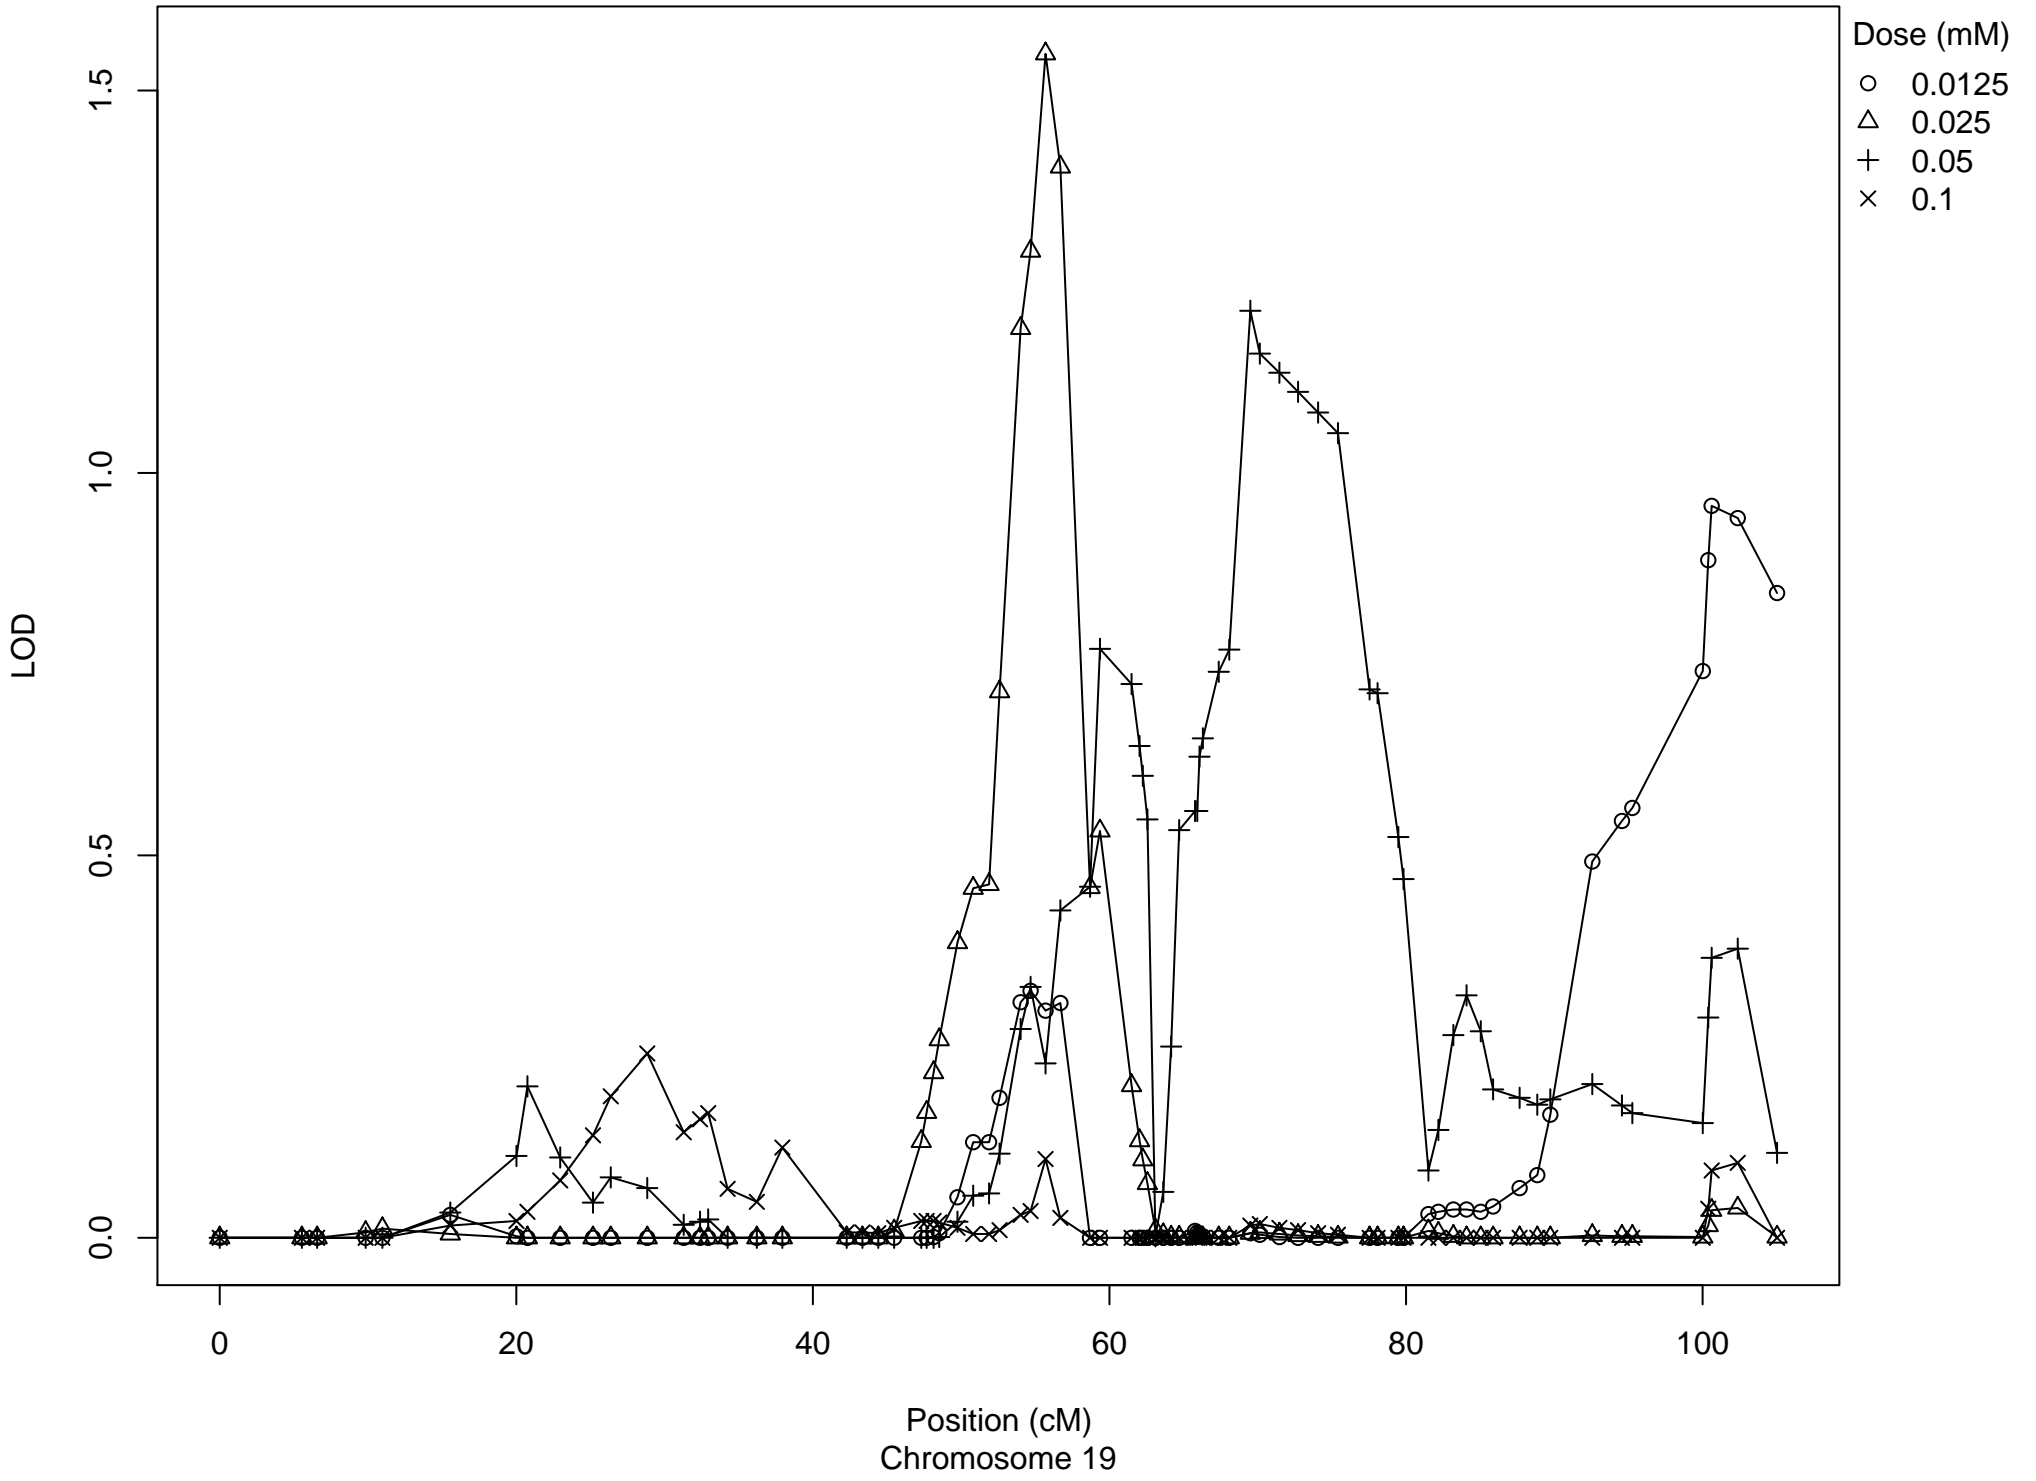

# Busulfan (Busulf)

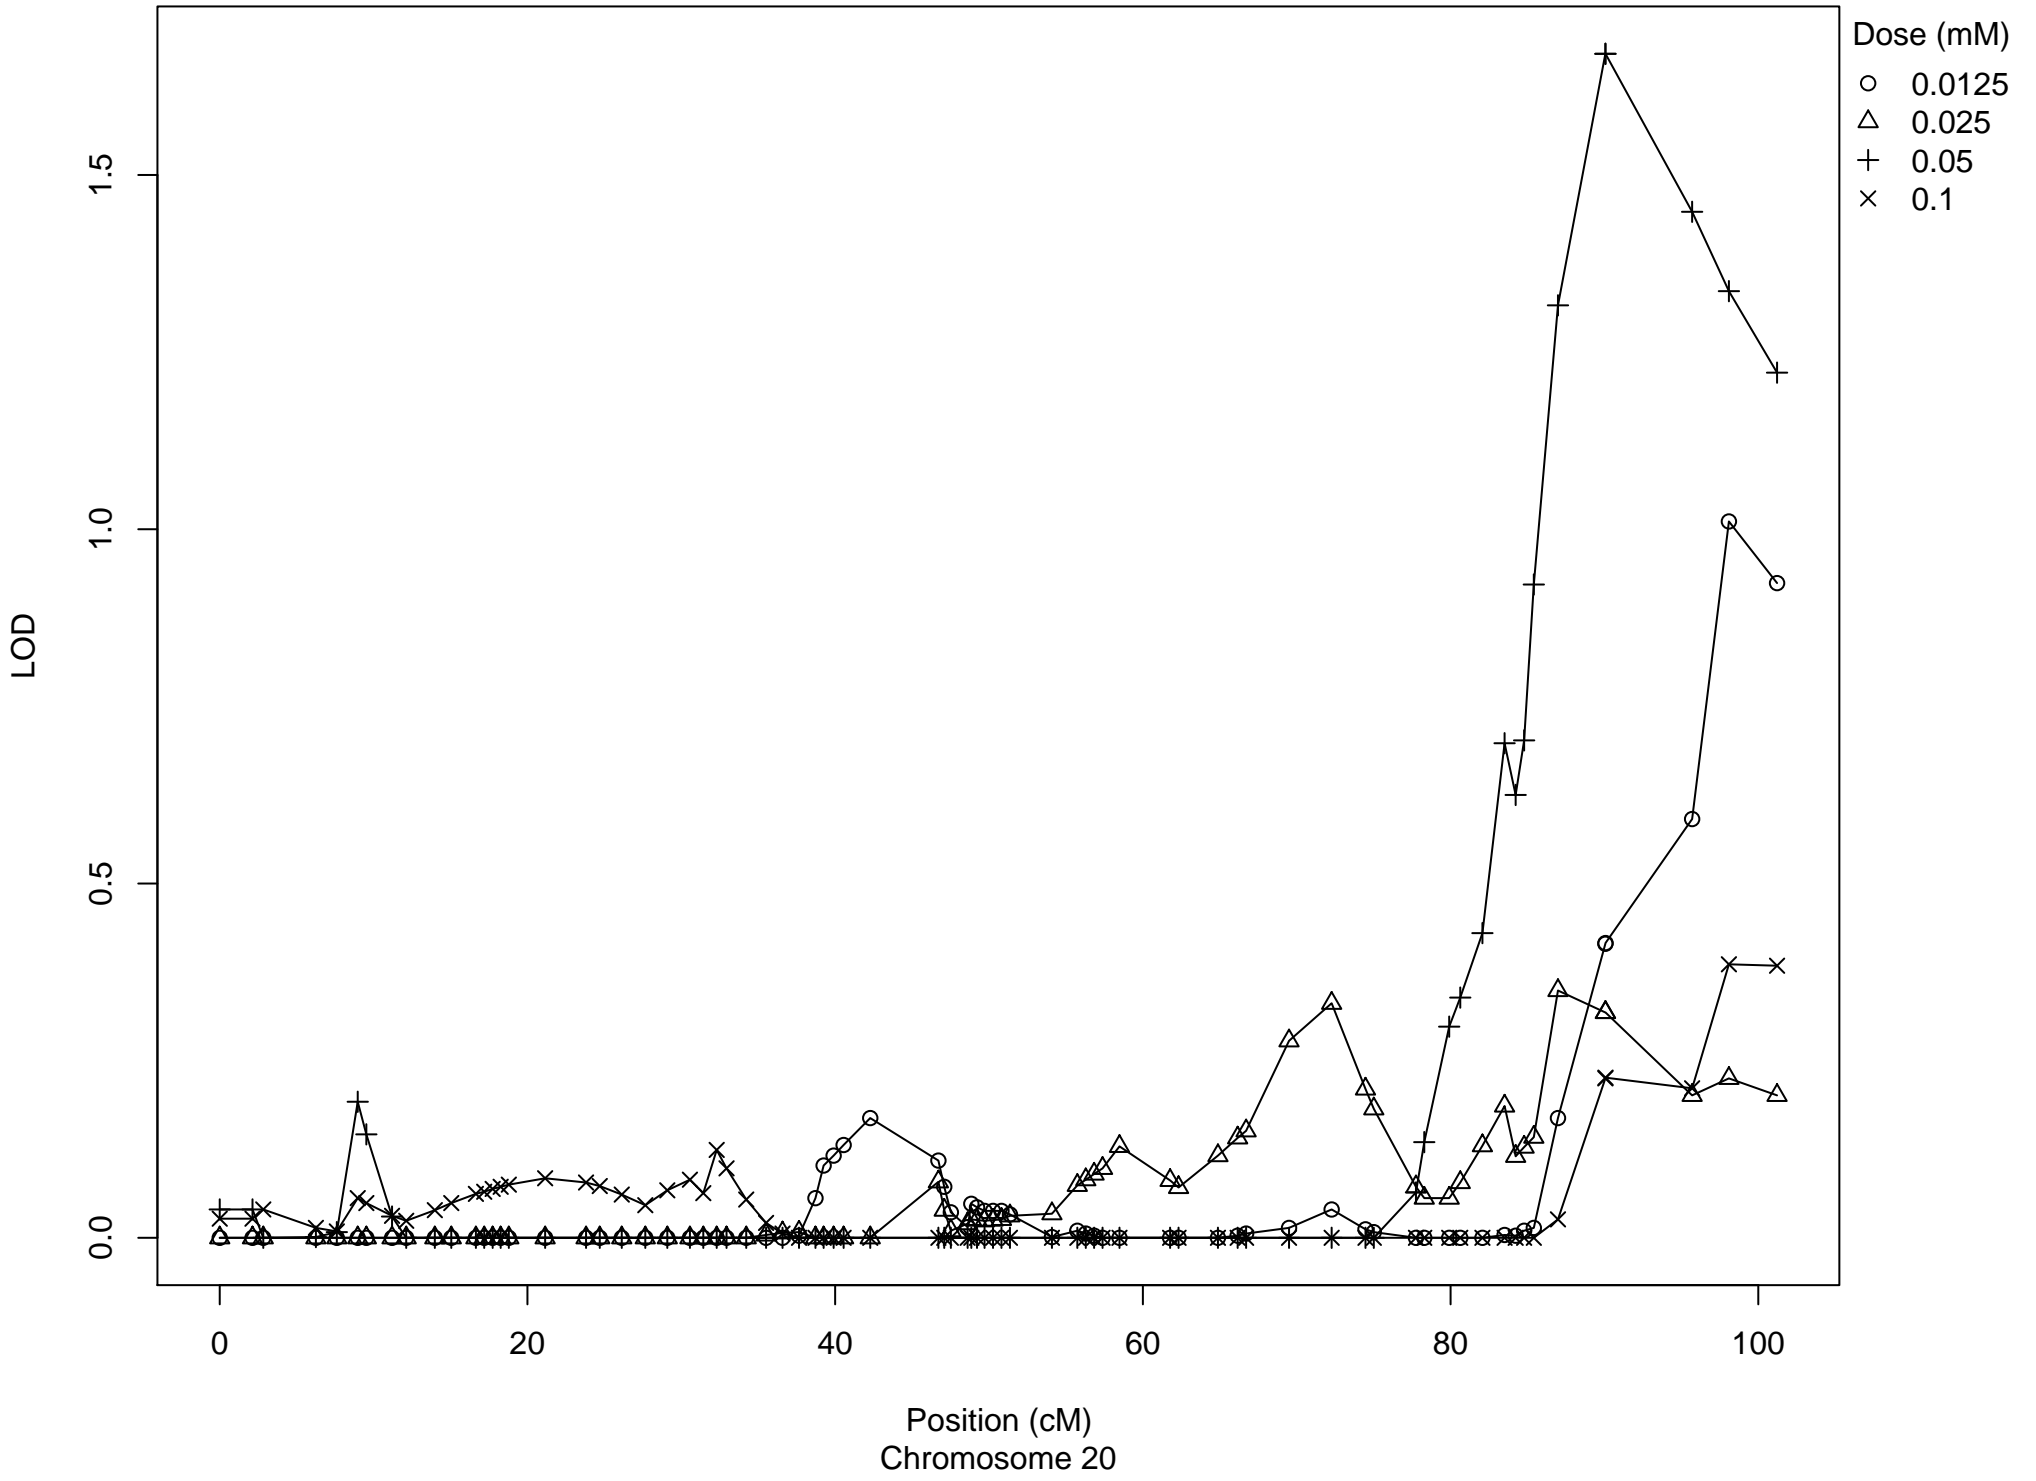

# Busulfan (Busulf)

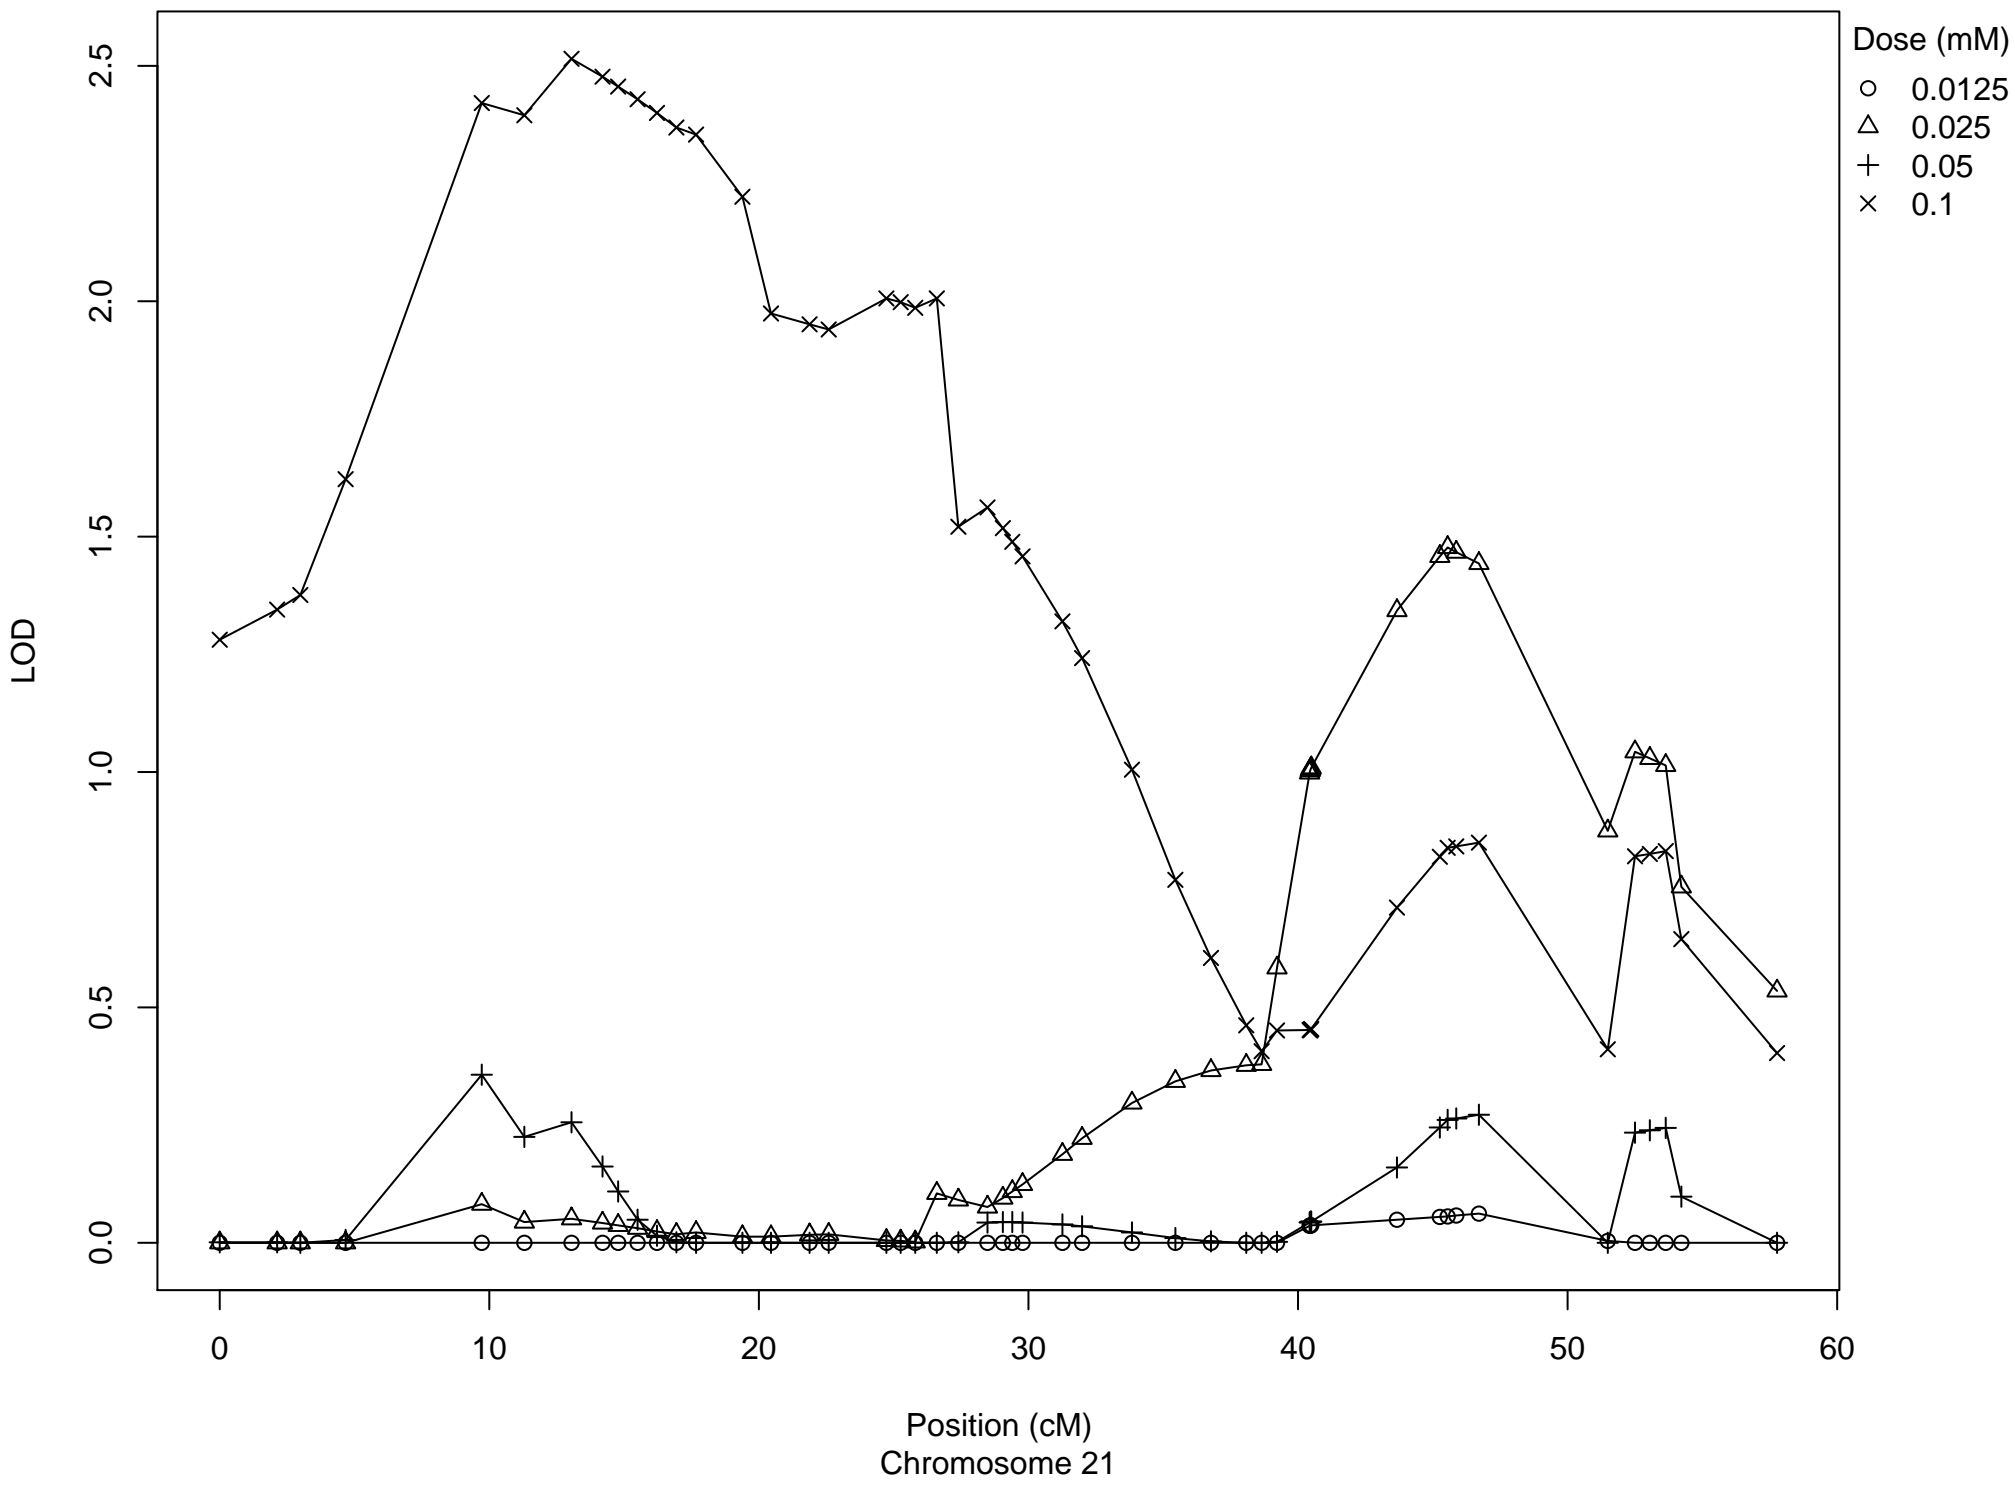

# Busulfan (Busulf)

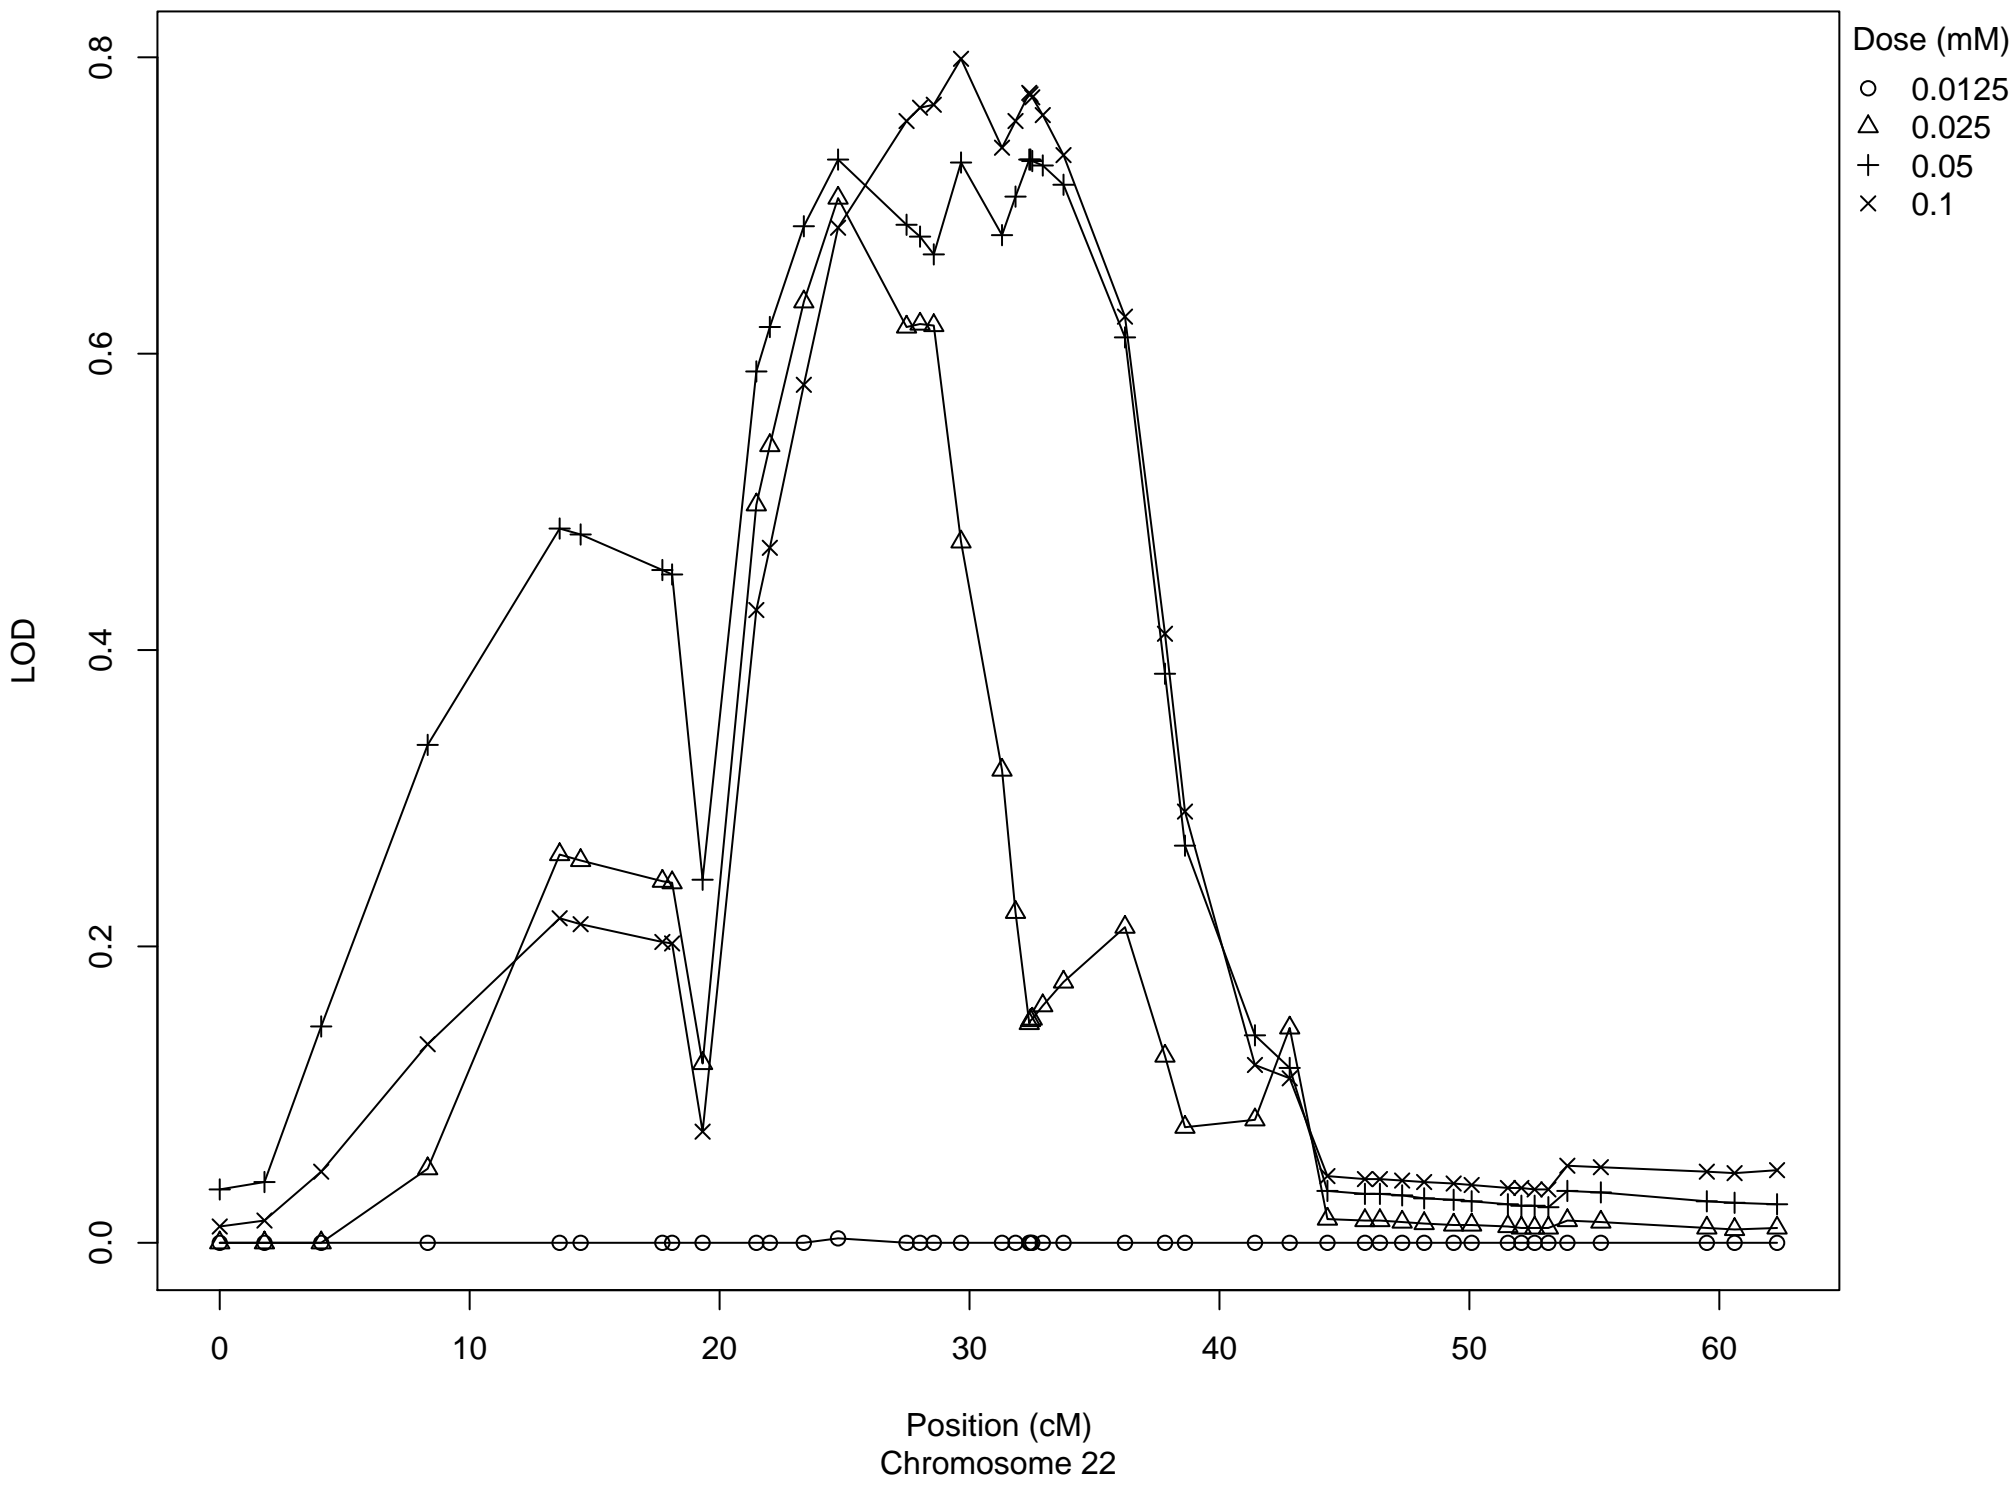



# Carboplatin (Carbo)

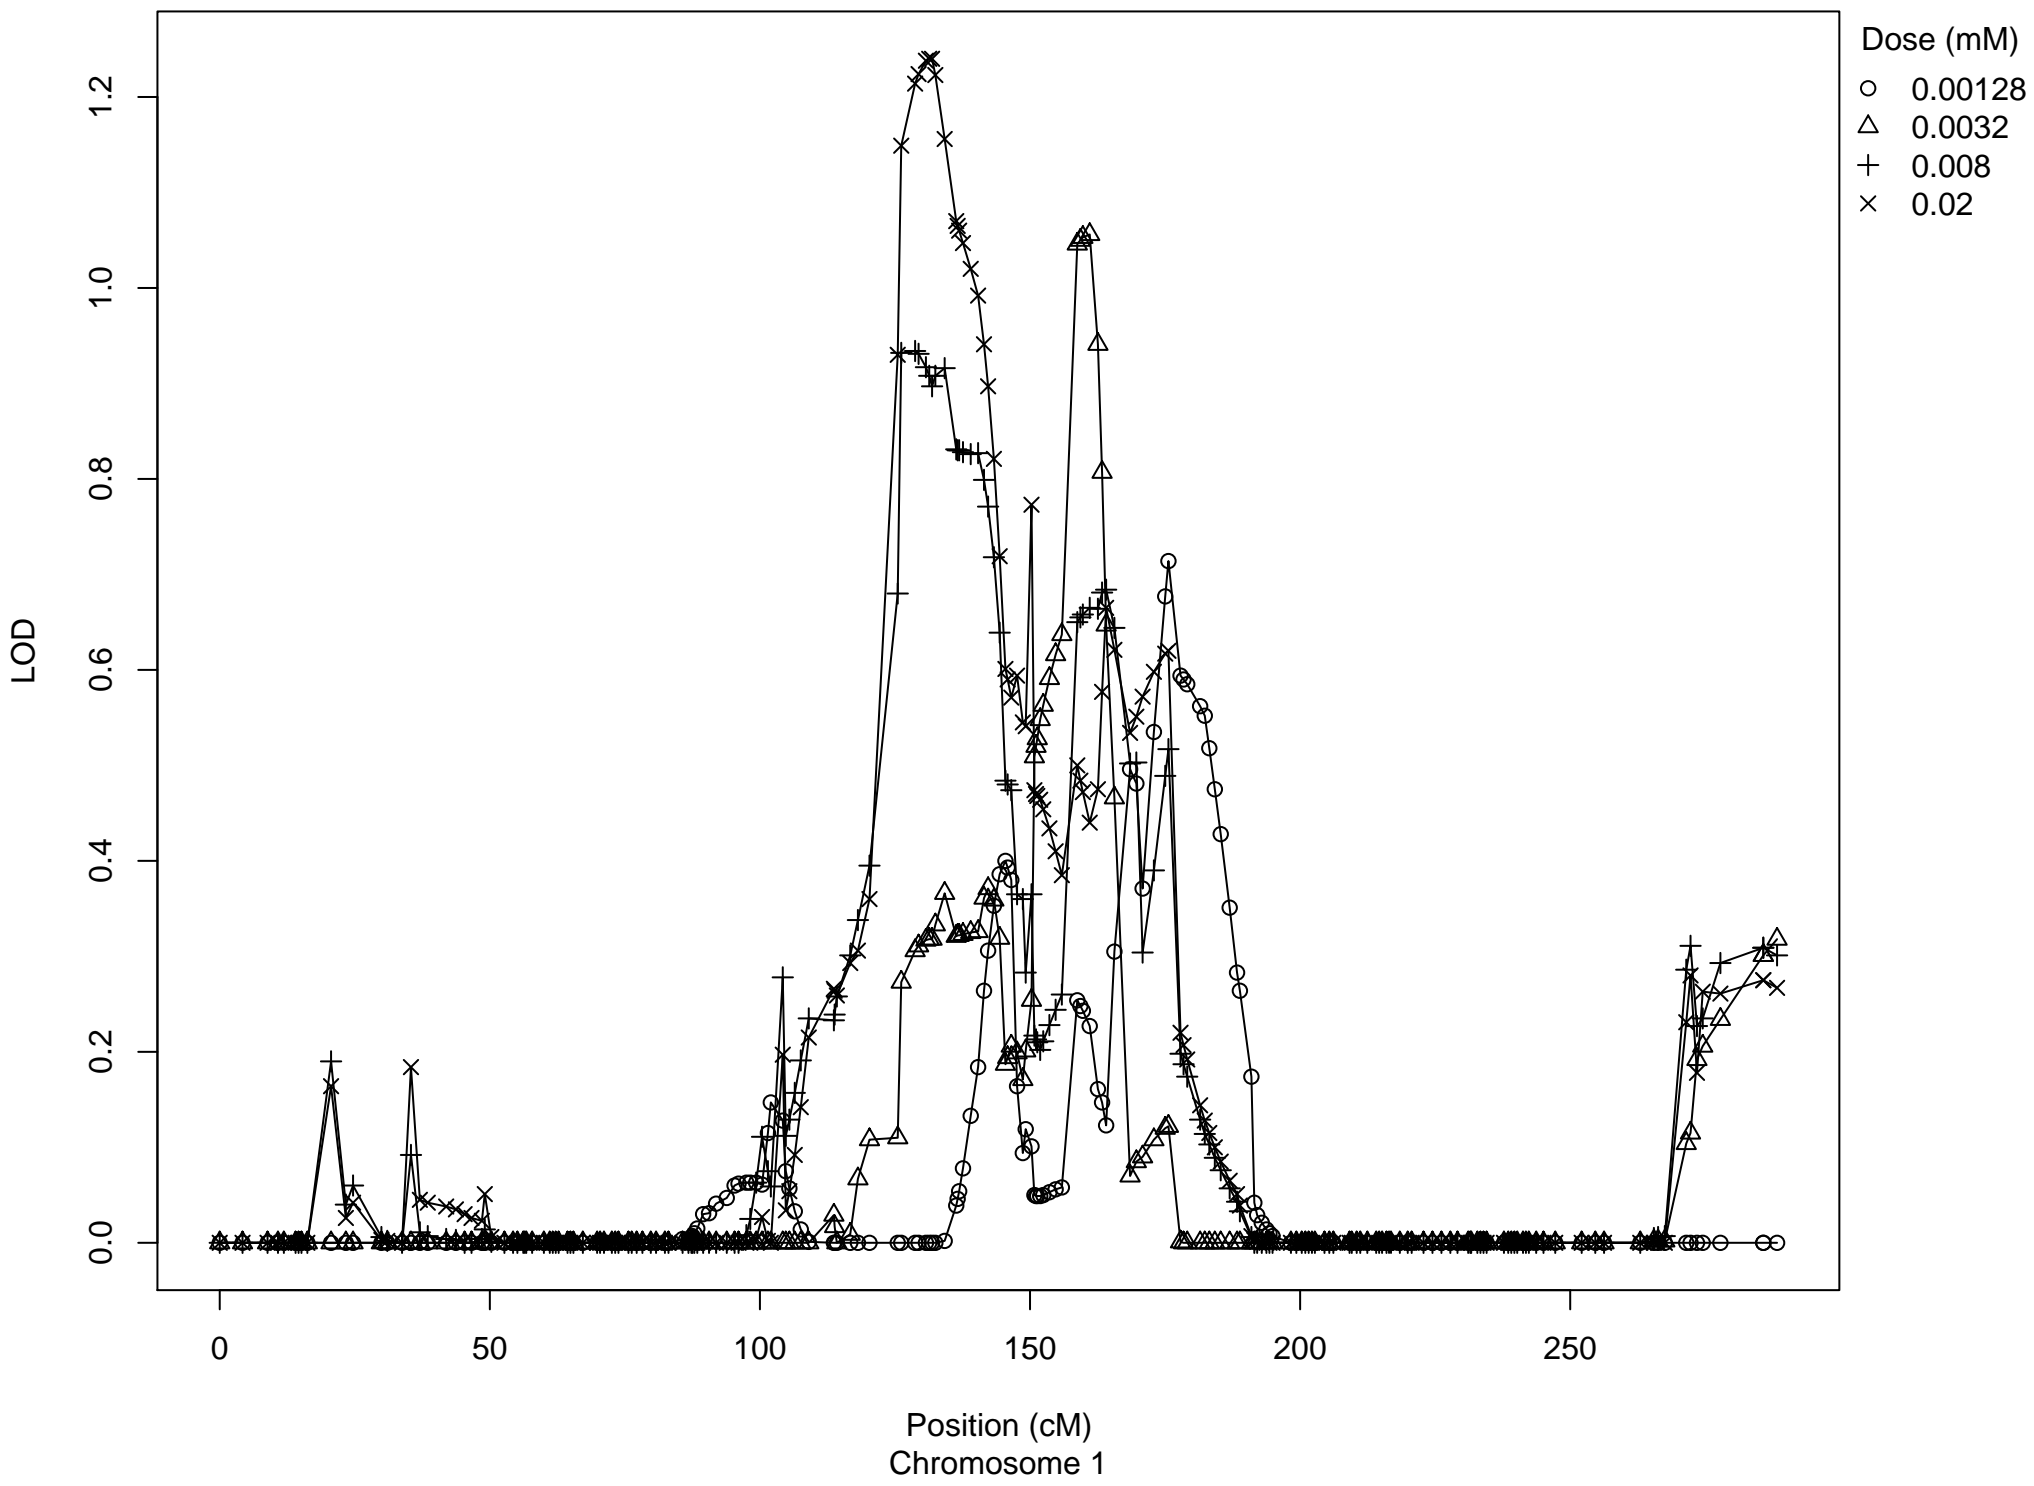

# Carboplatin (Carbo)

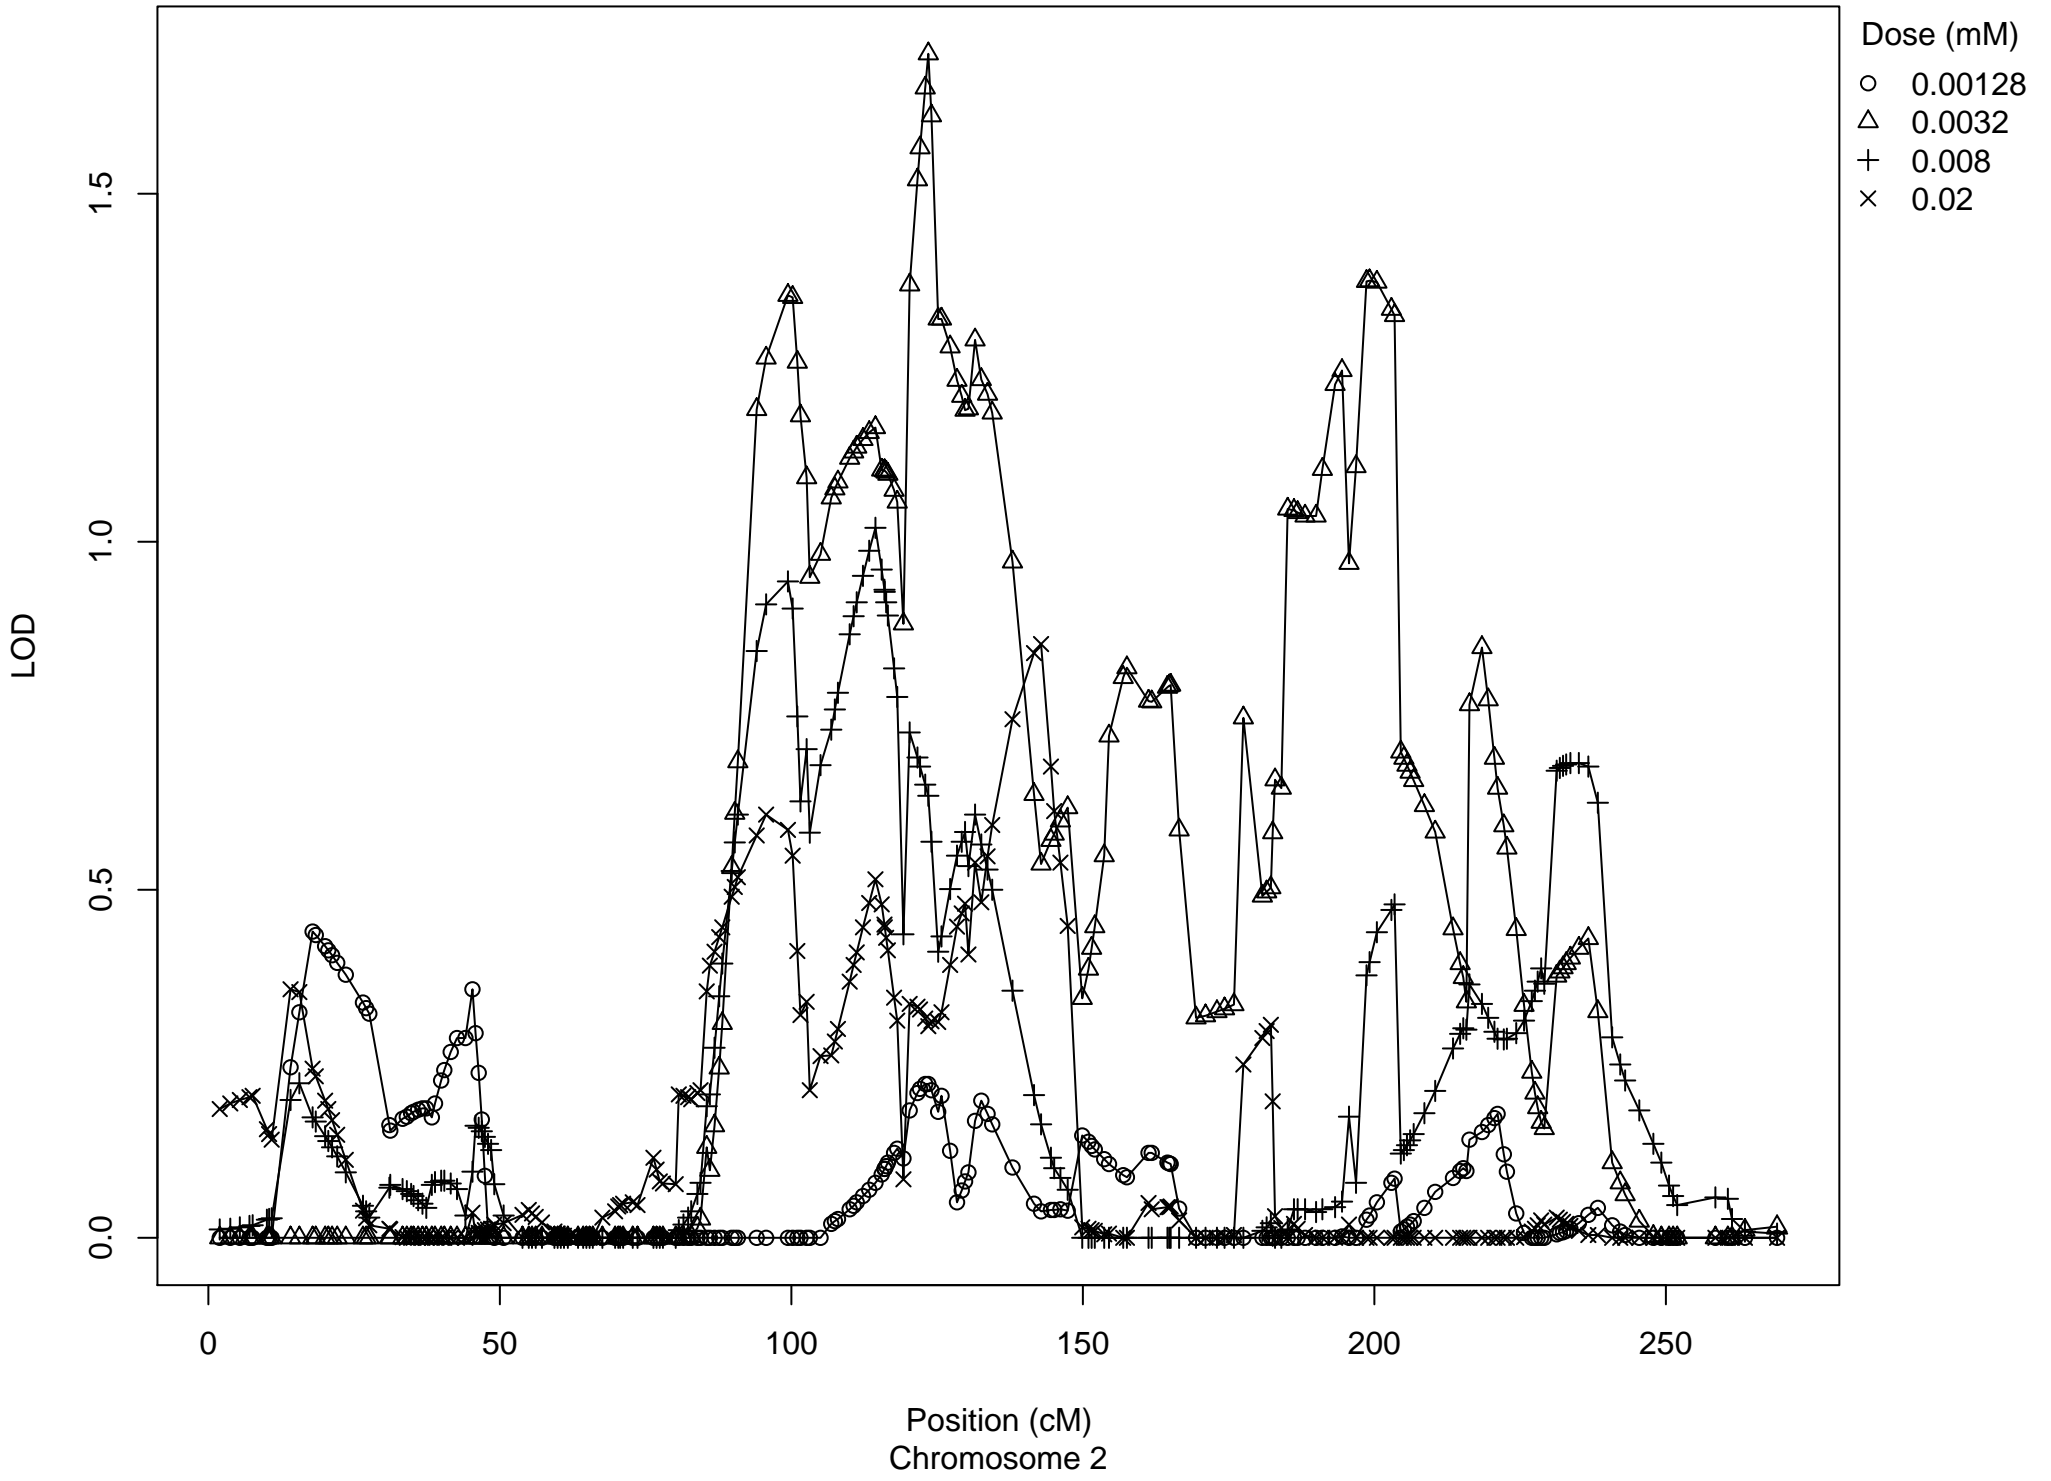

# Carboplatin (Carbo)

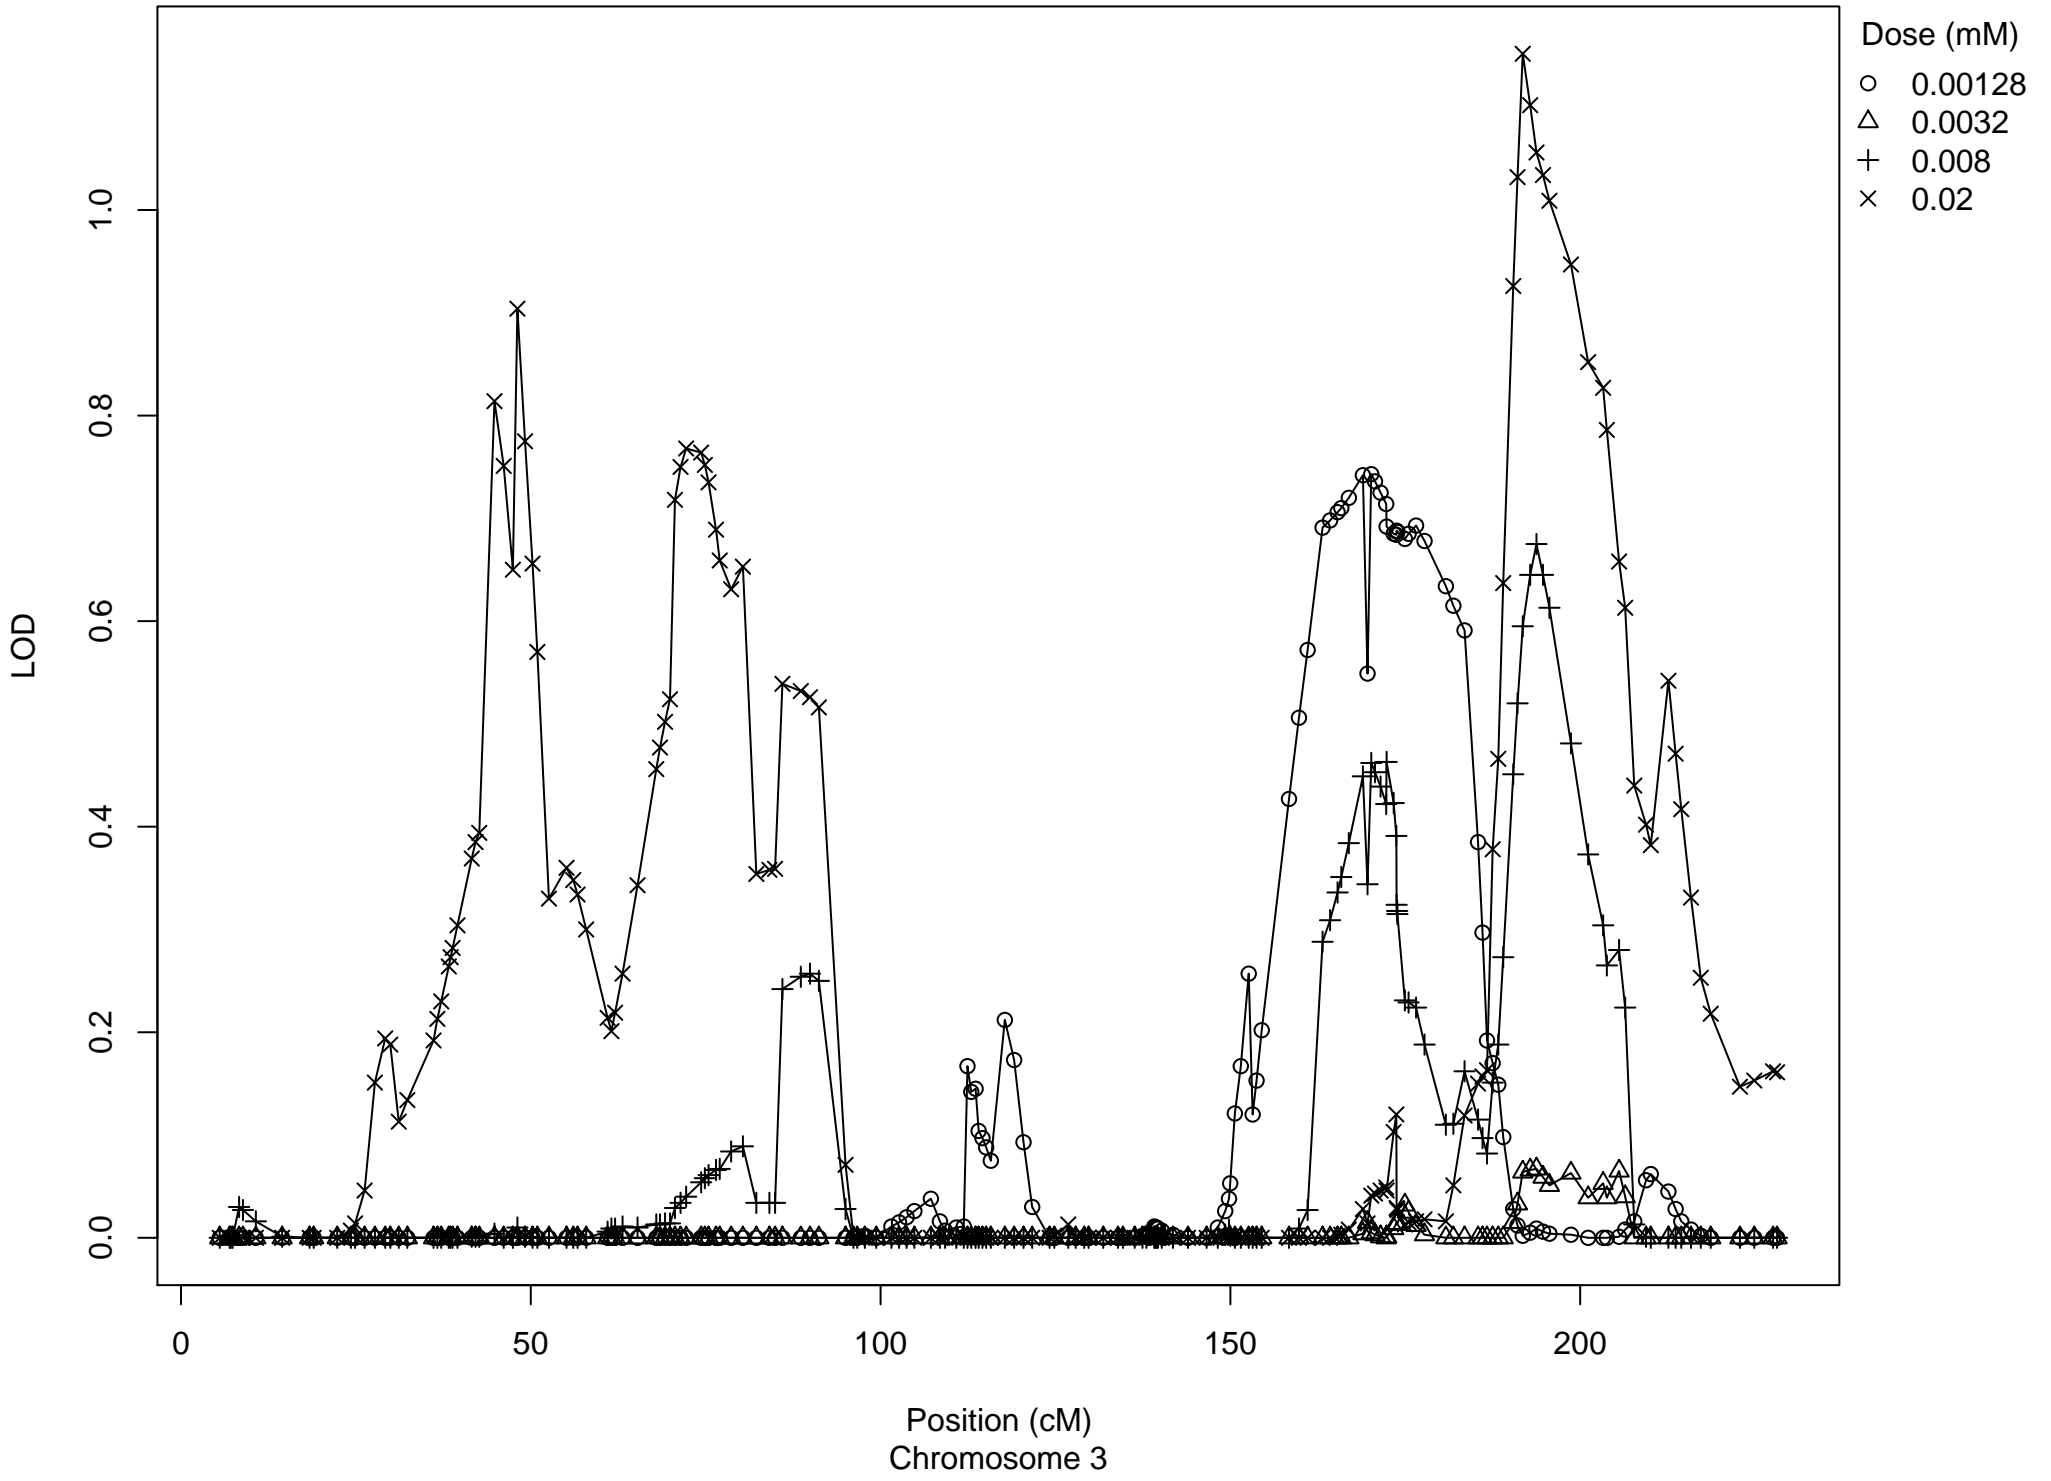

# Carboplatin (Carbo)

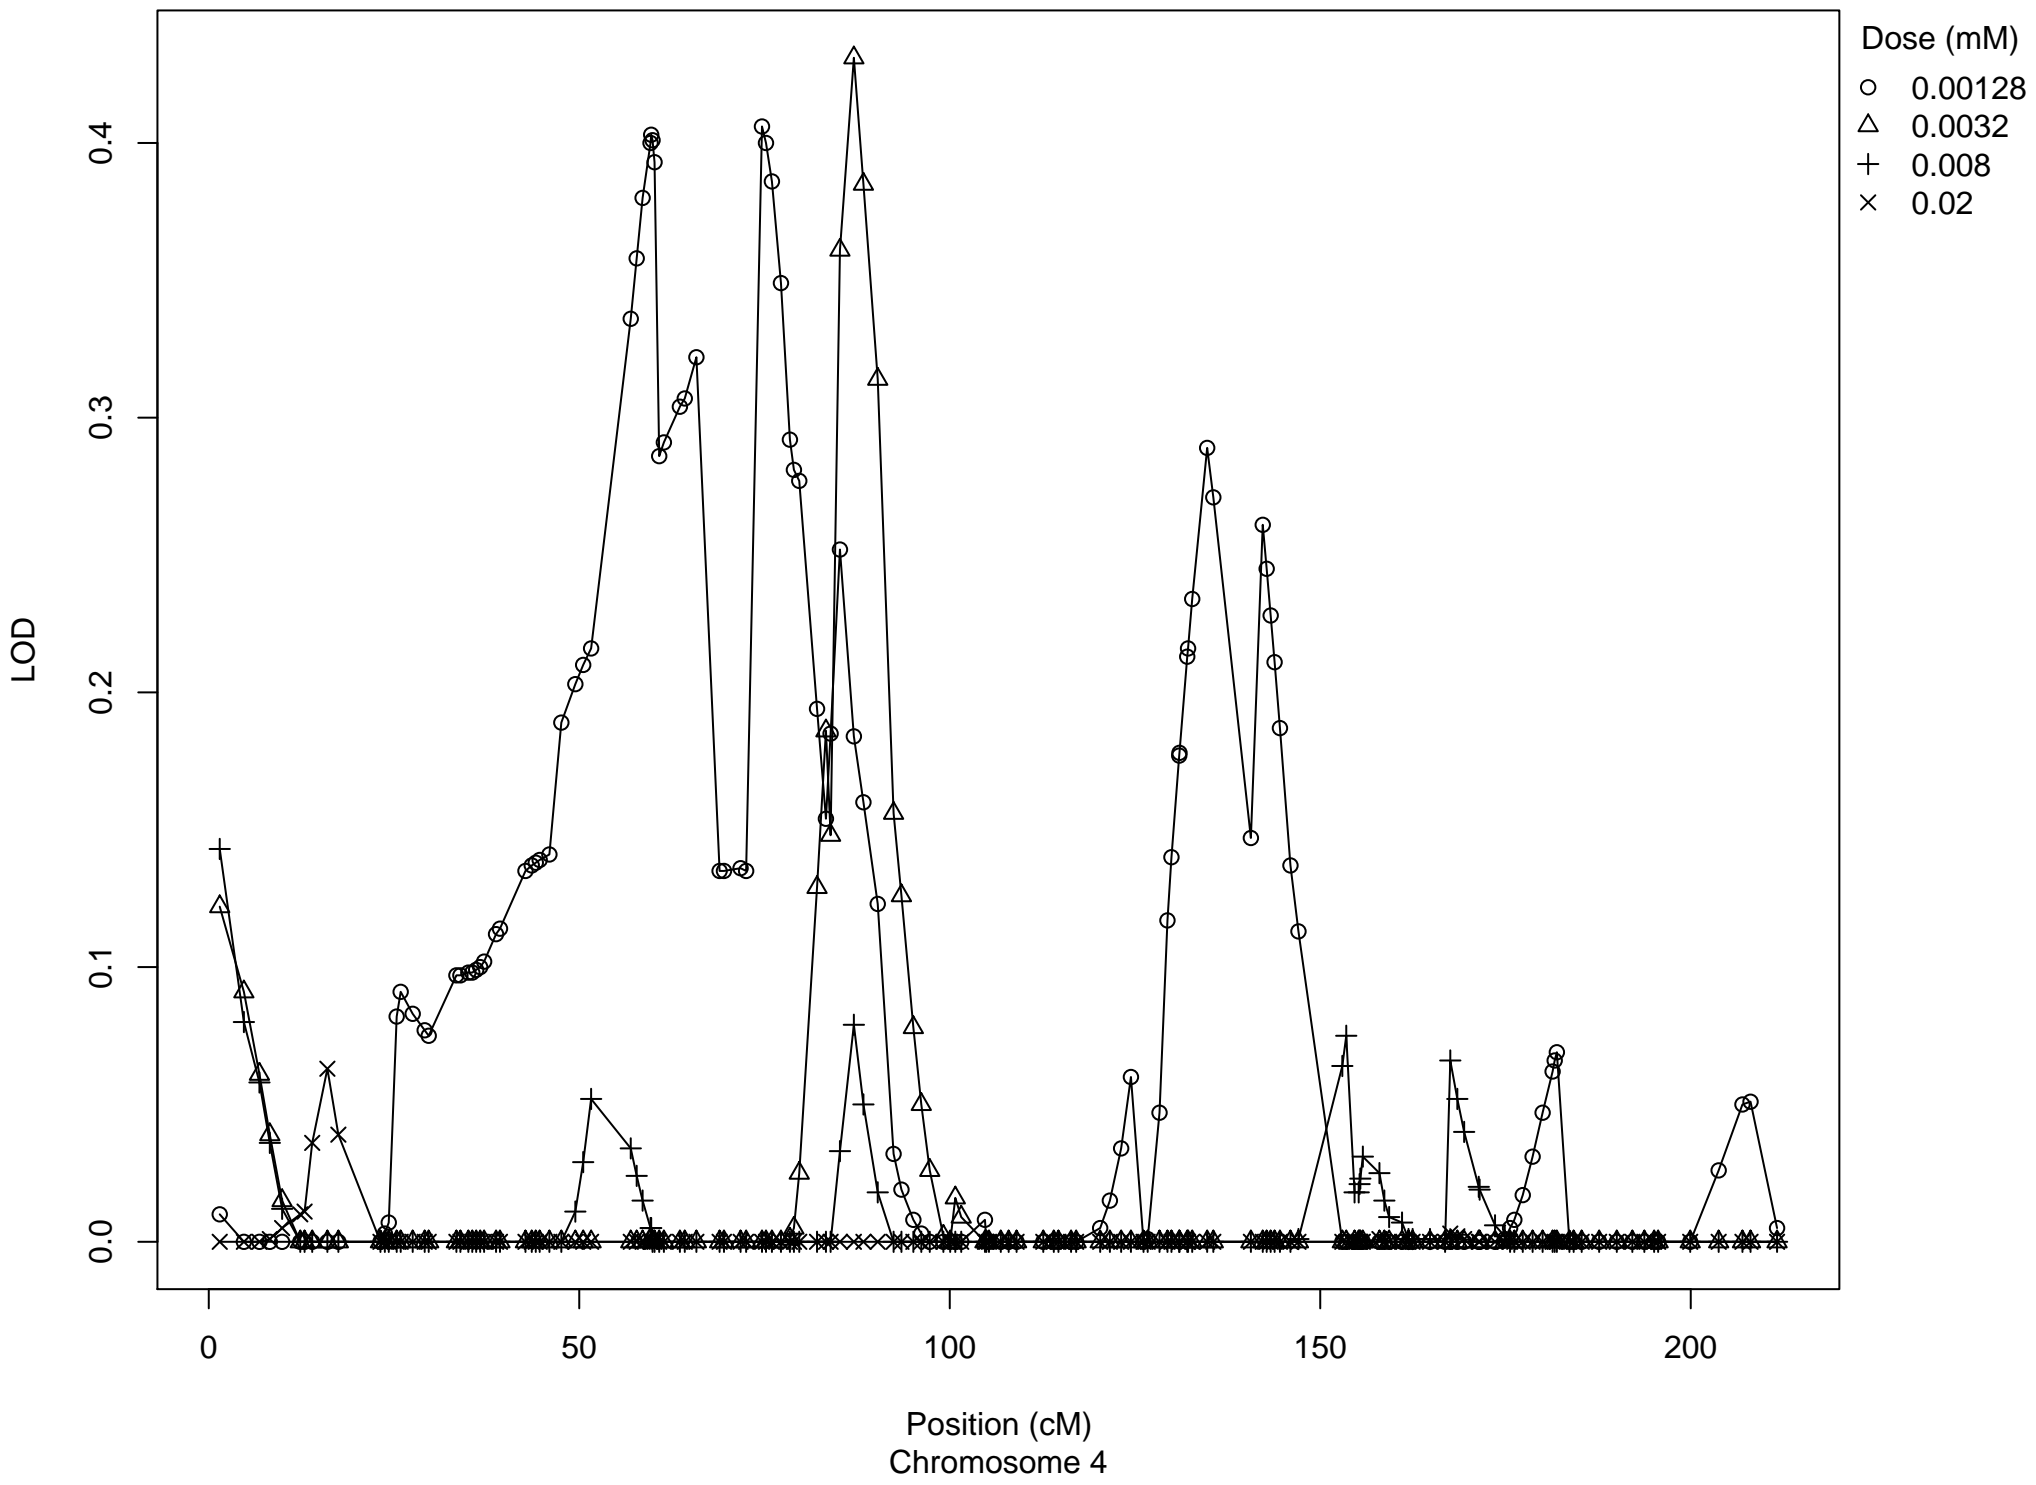

# Carboplatin (Carbo)

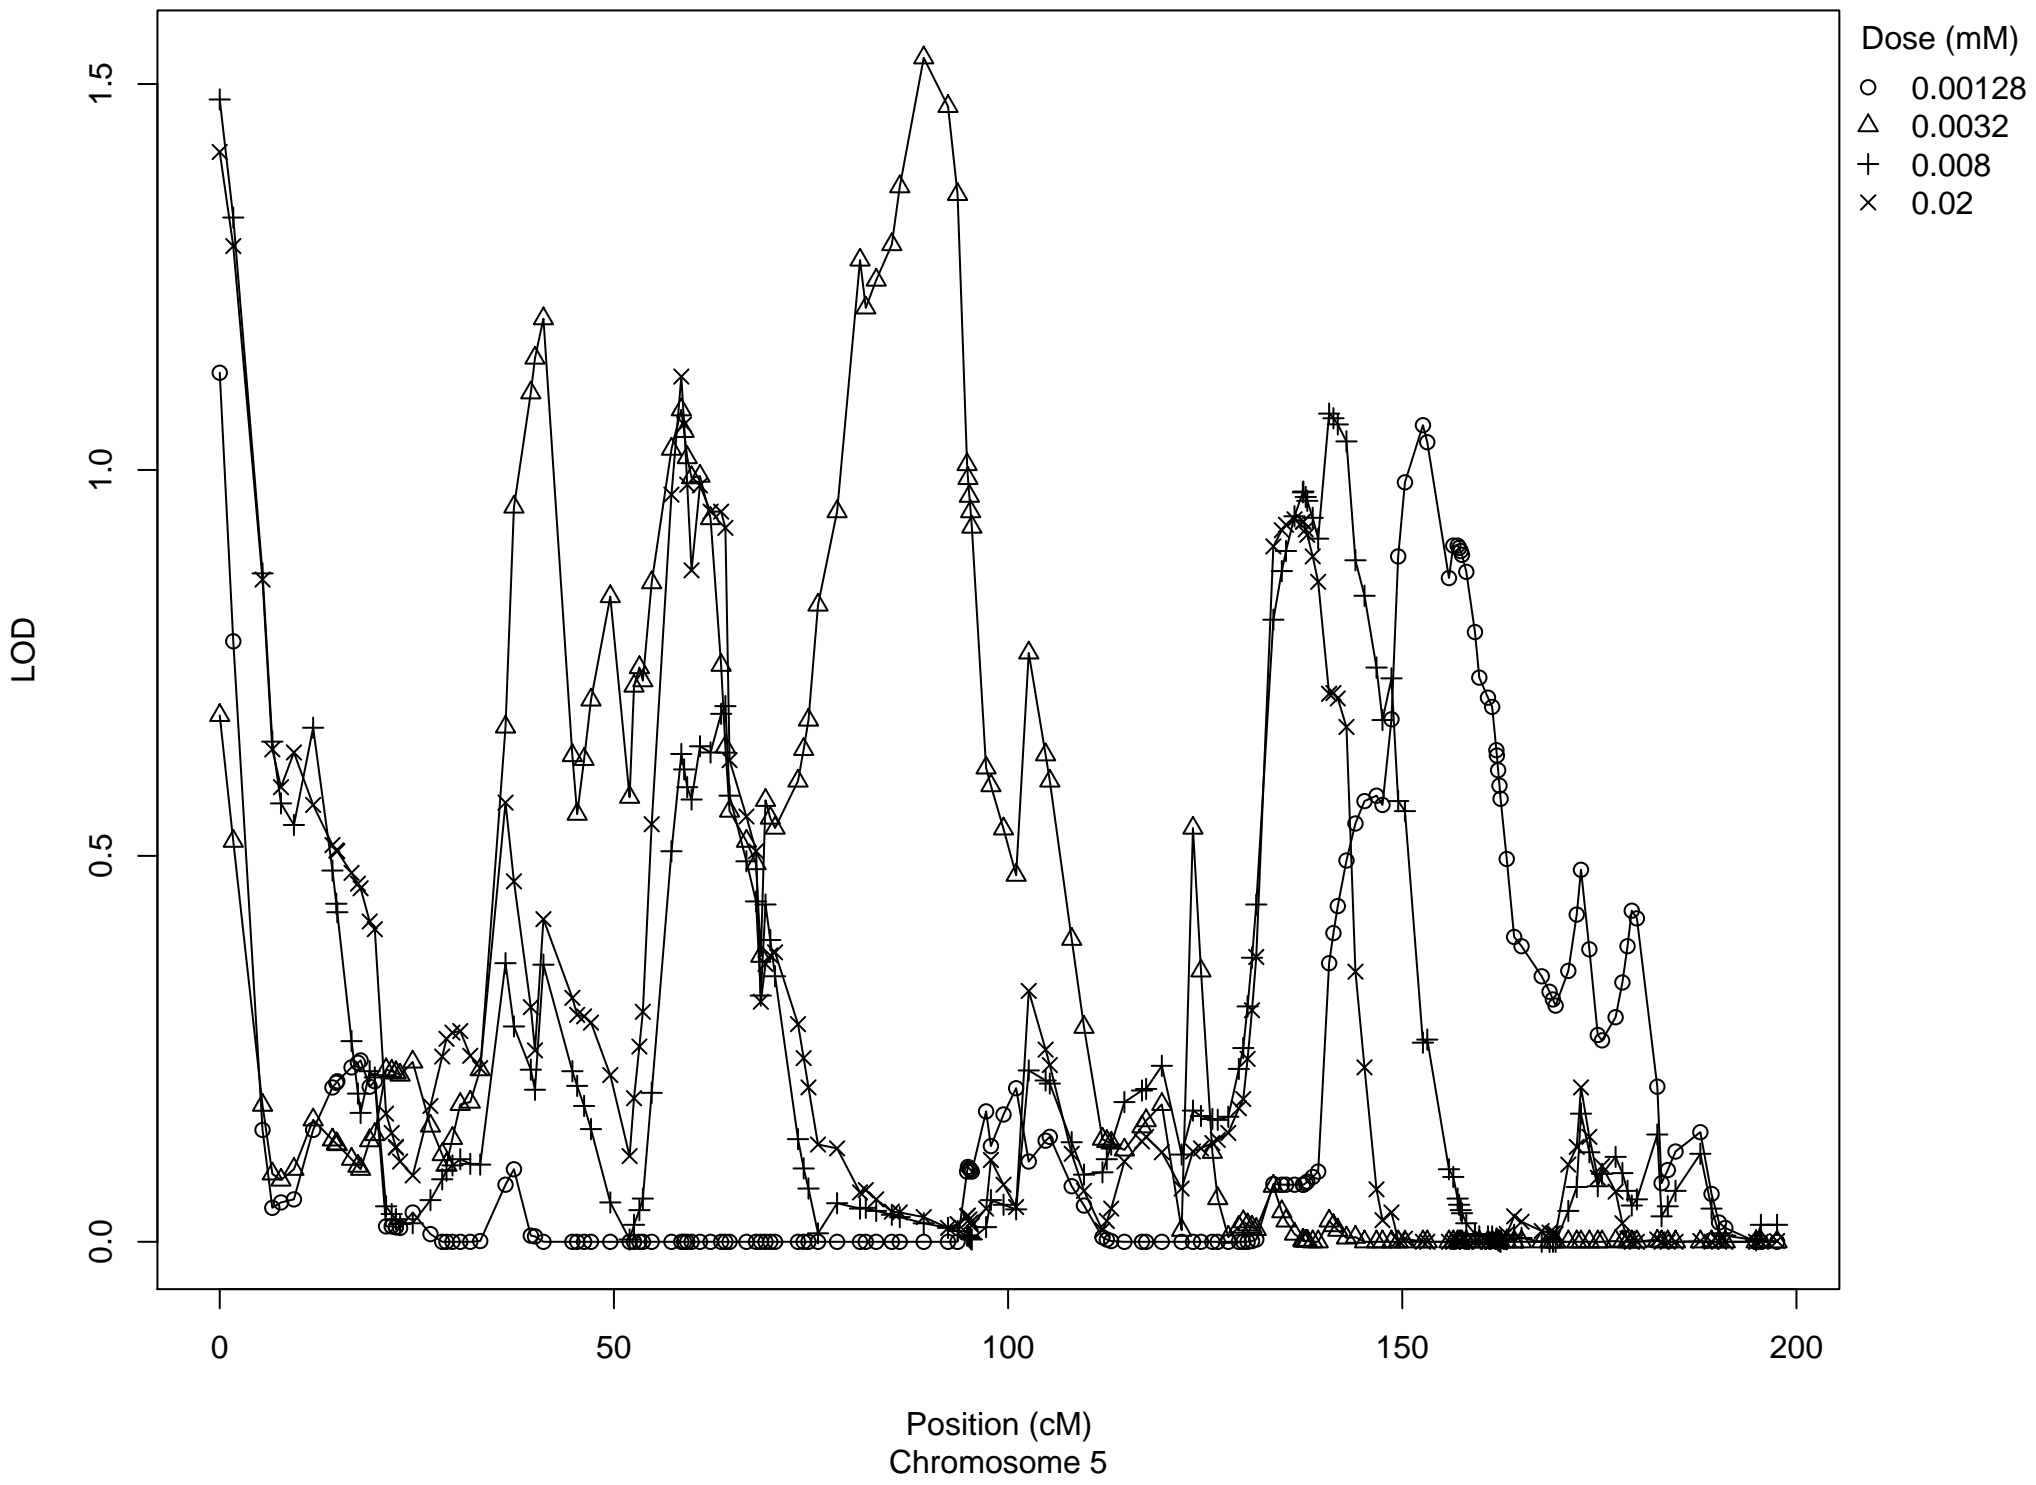

# Carboplatin (Carbo)

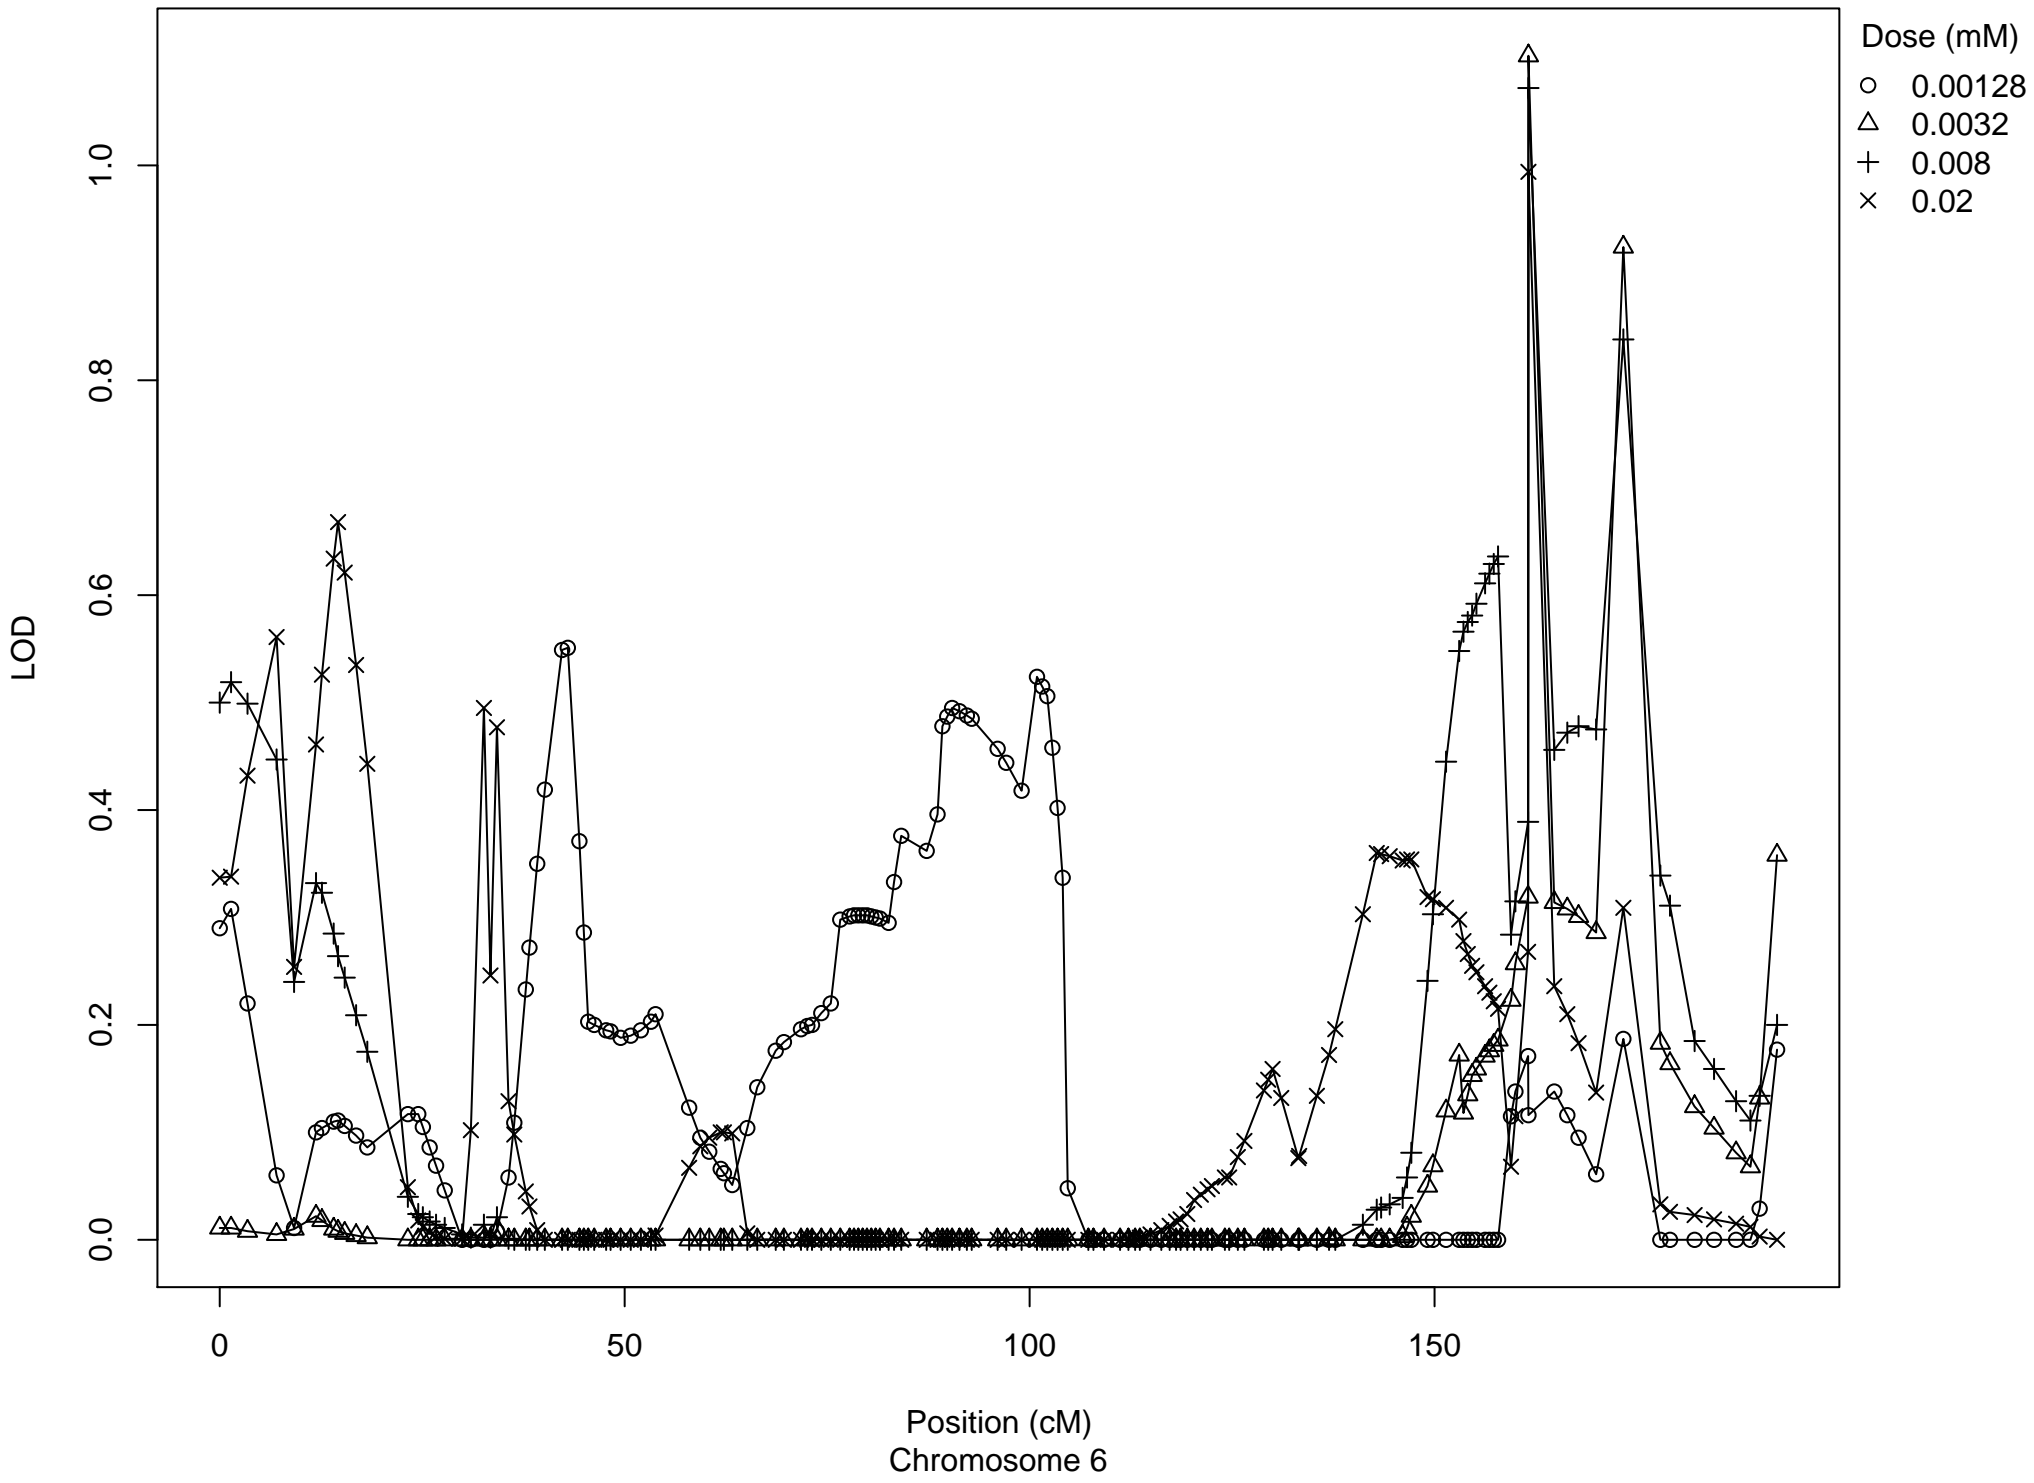

# Carboplatin (Carbo)

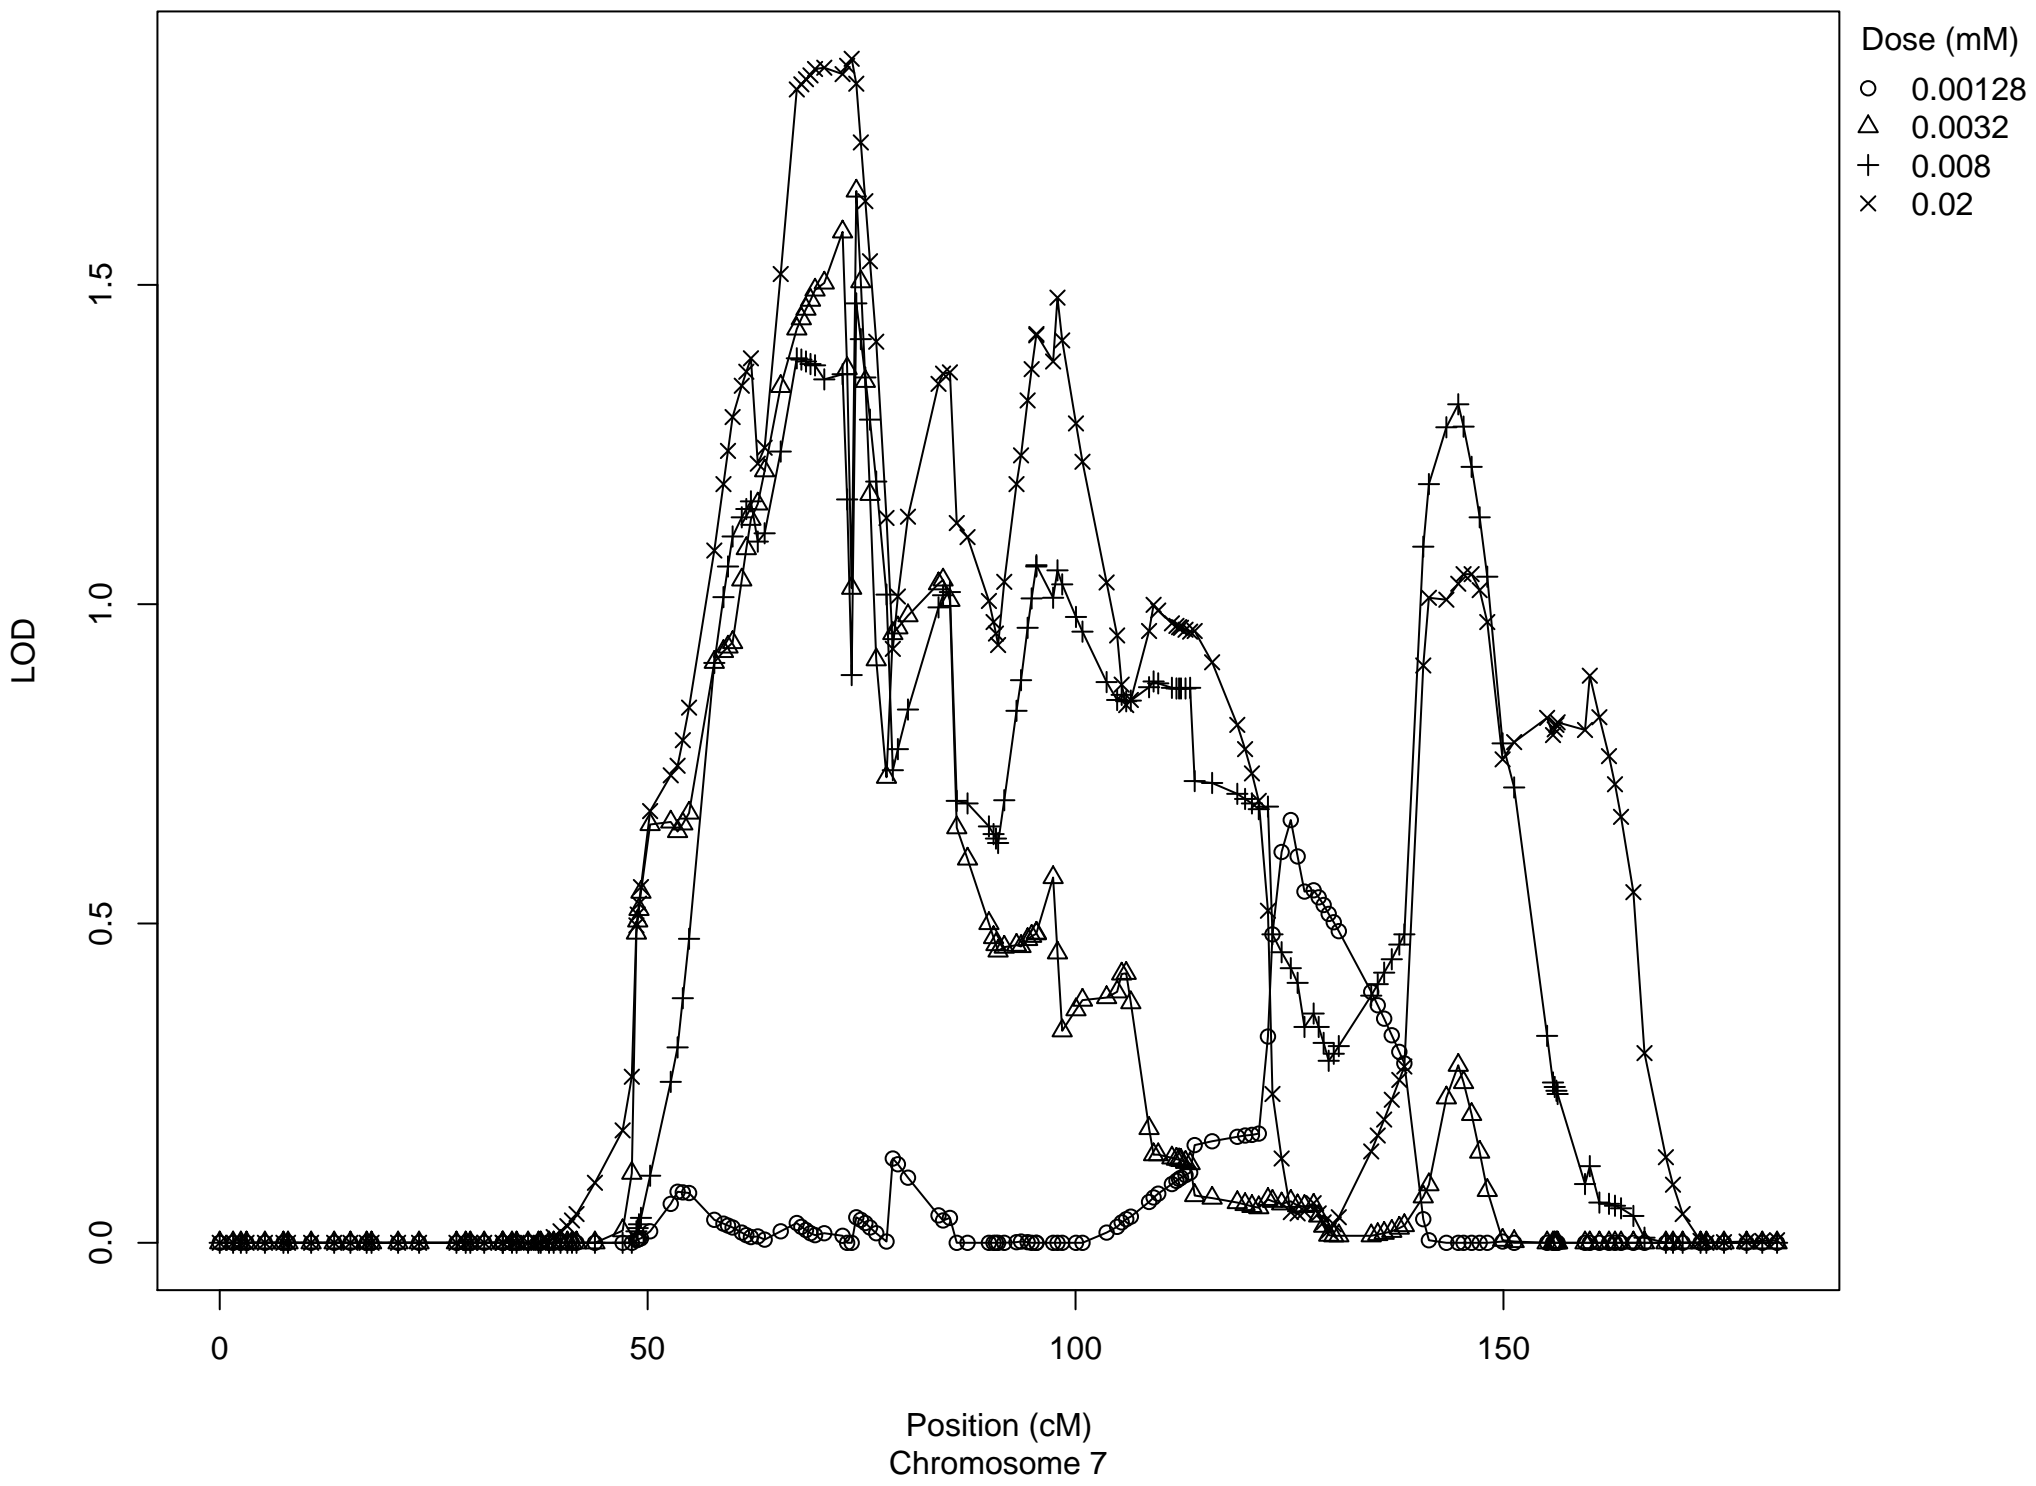

# Carboplatin (Carbo)

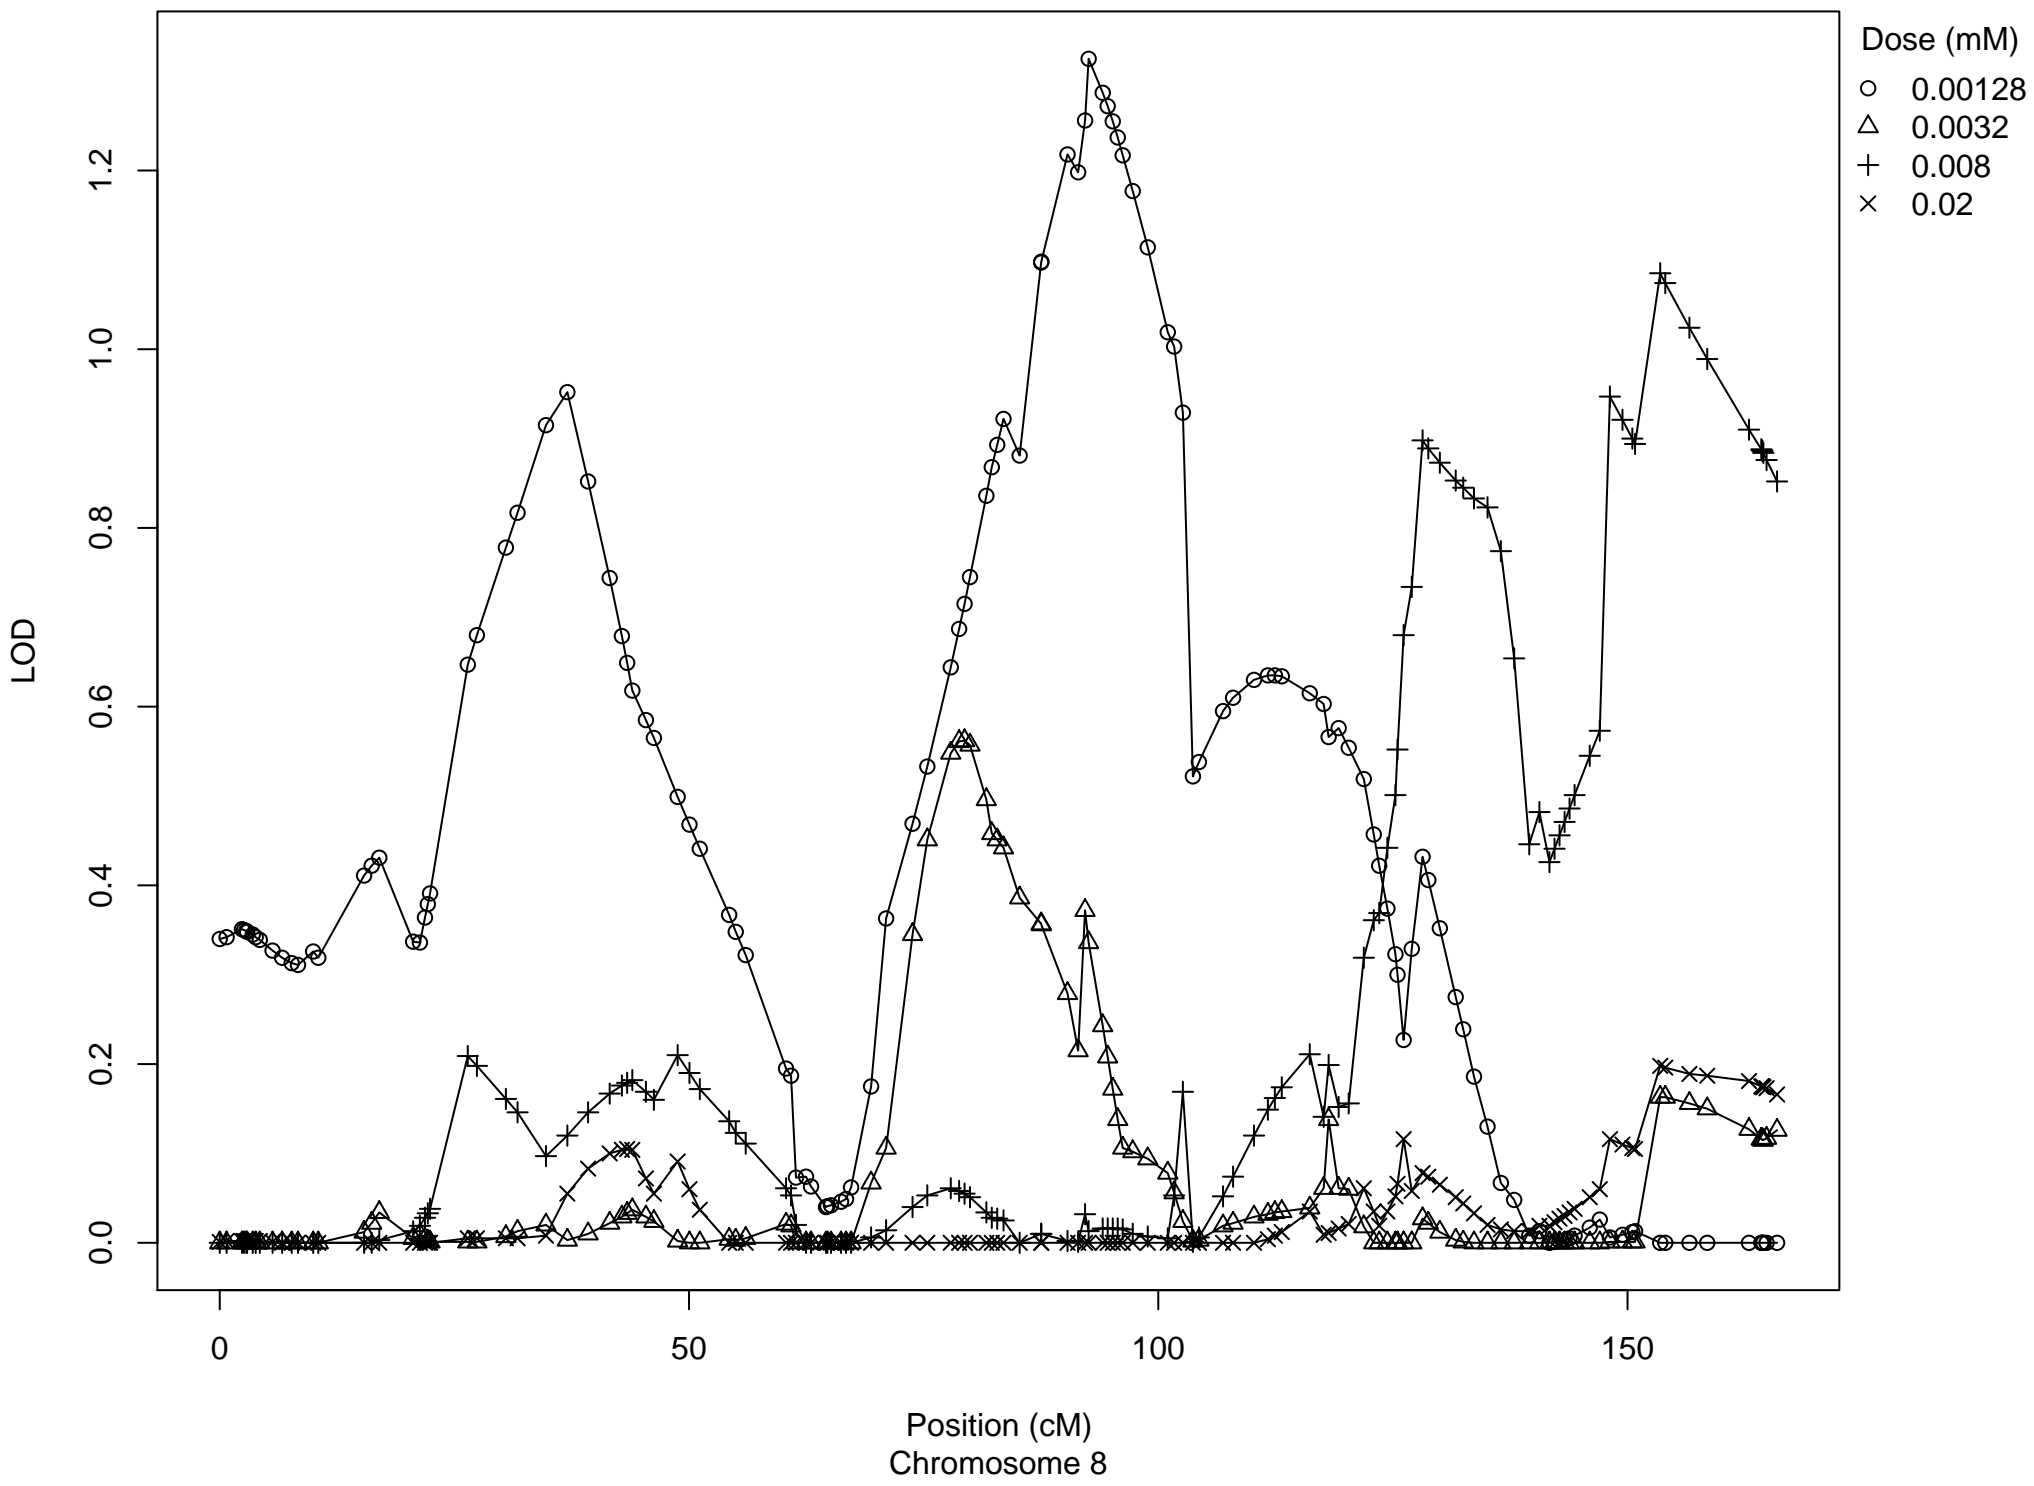



# Carboplatin (Carbo)

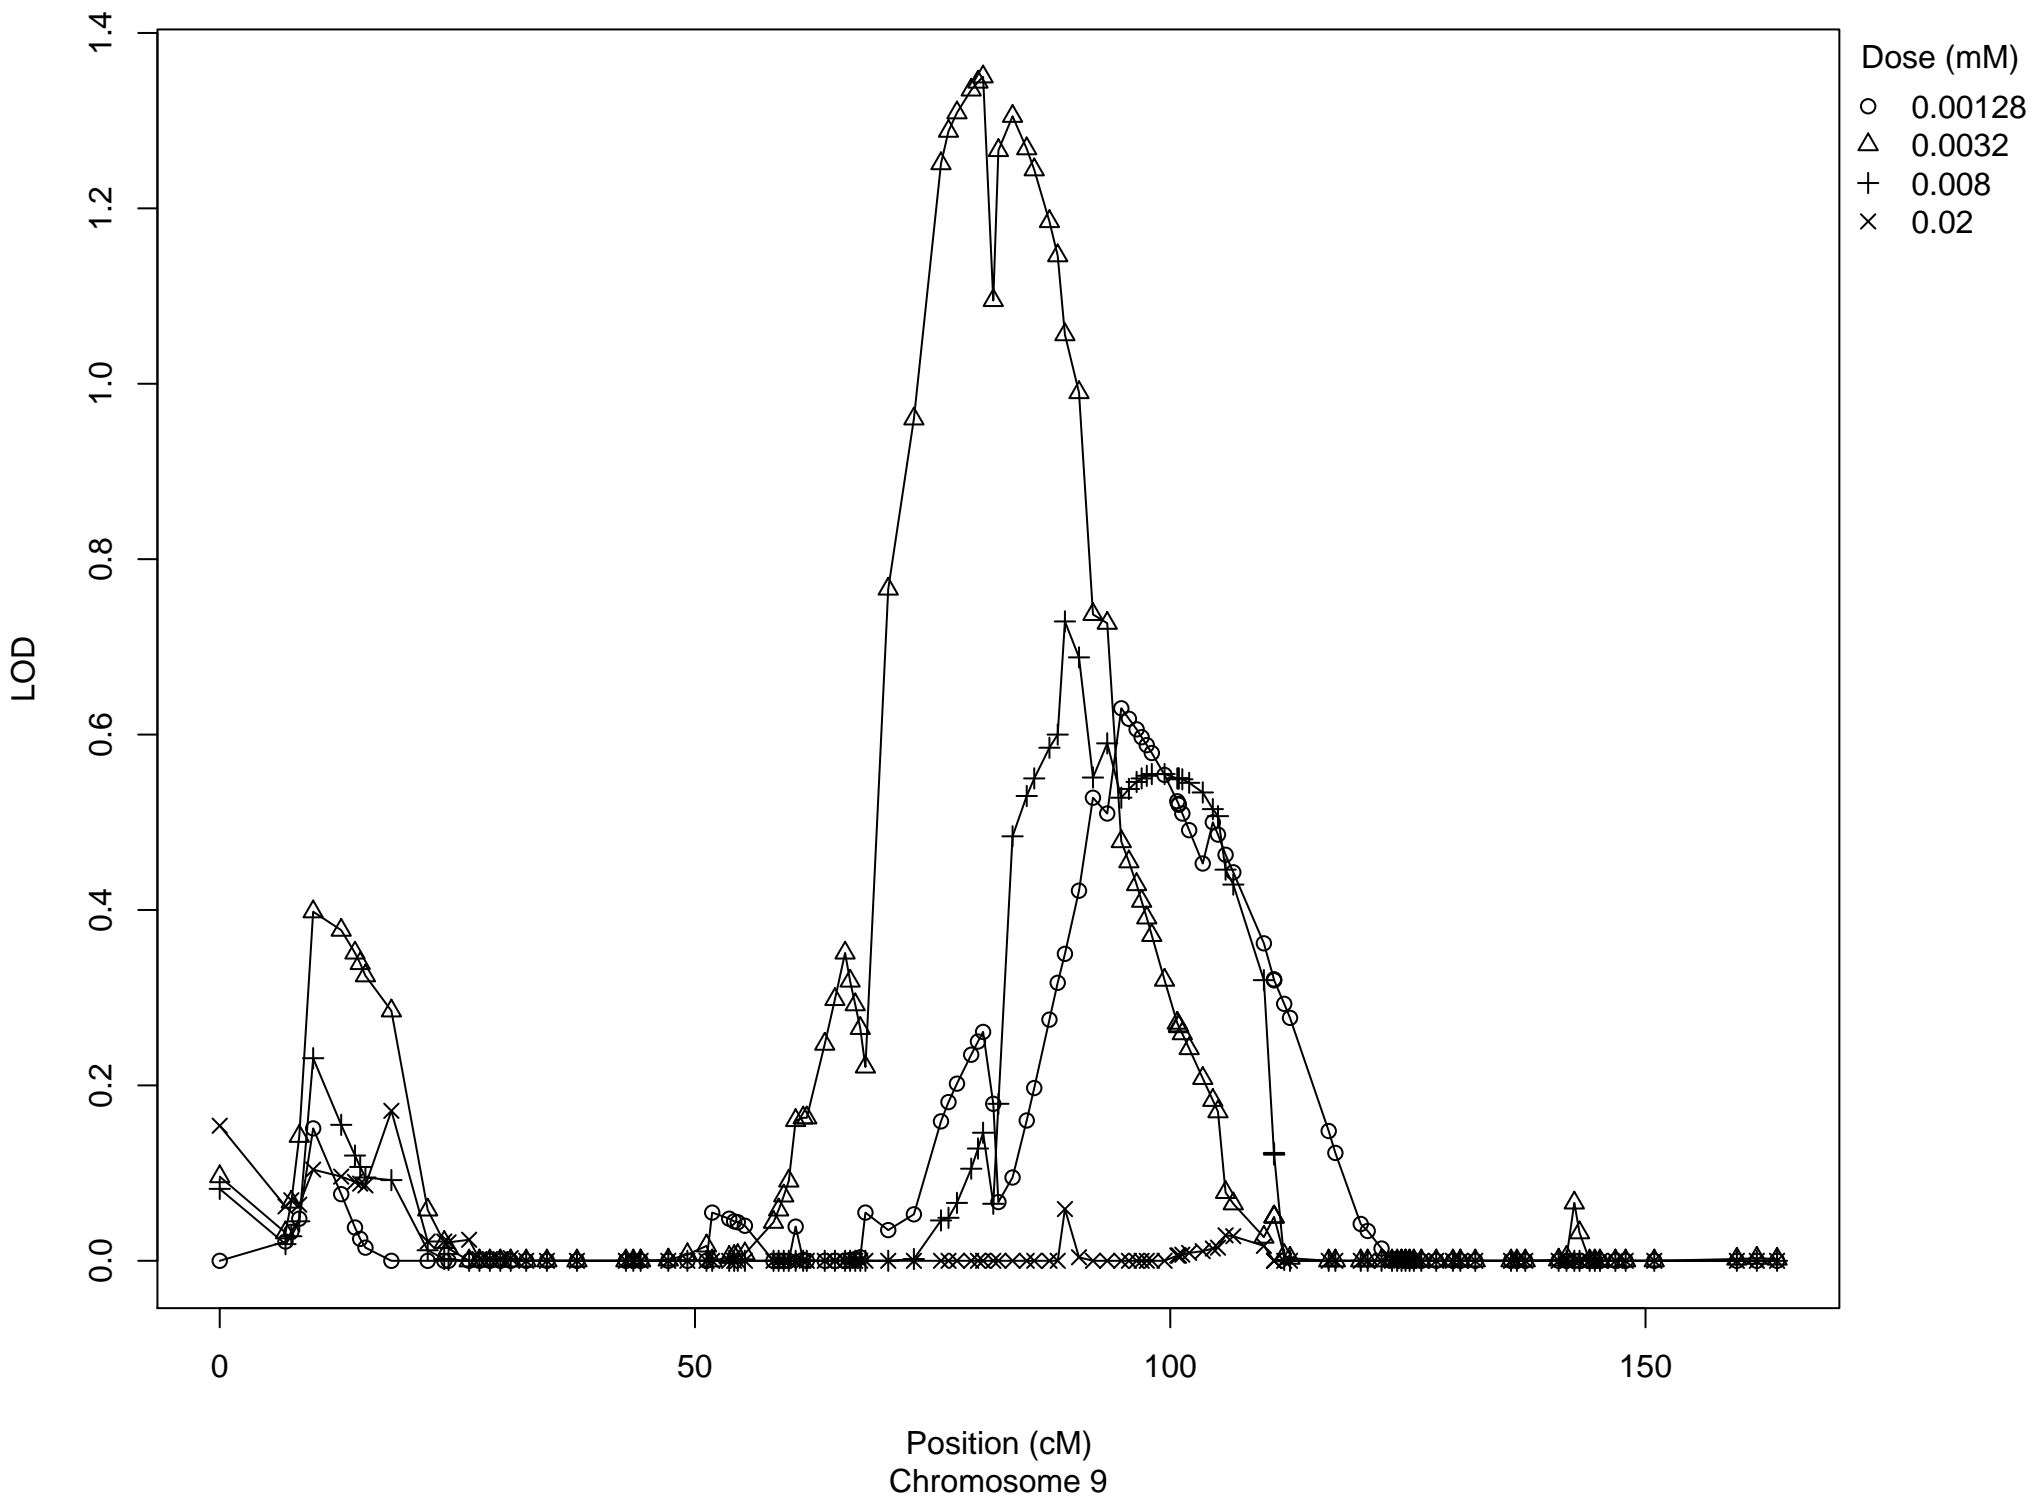

# Carboplatin (Carbo)

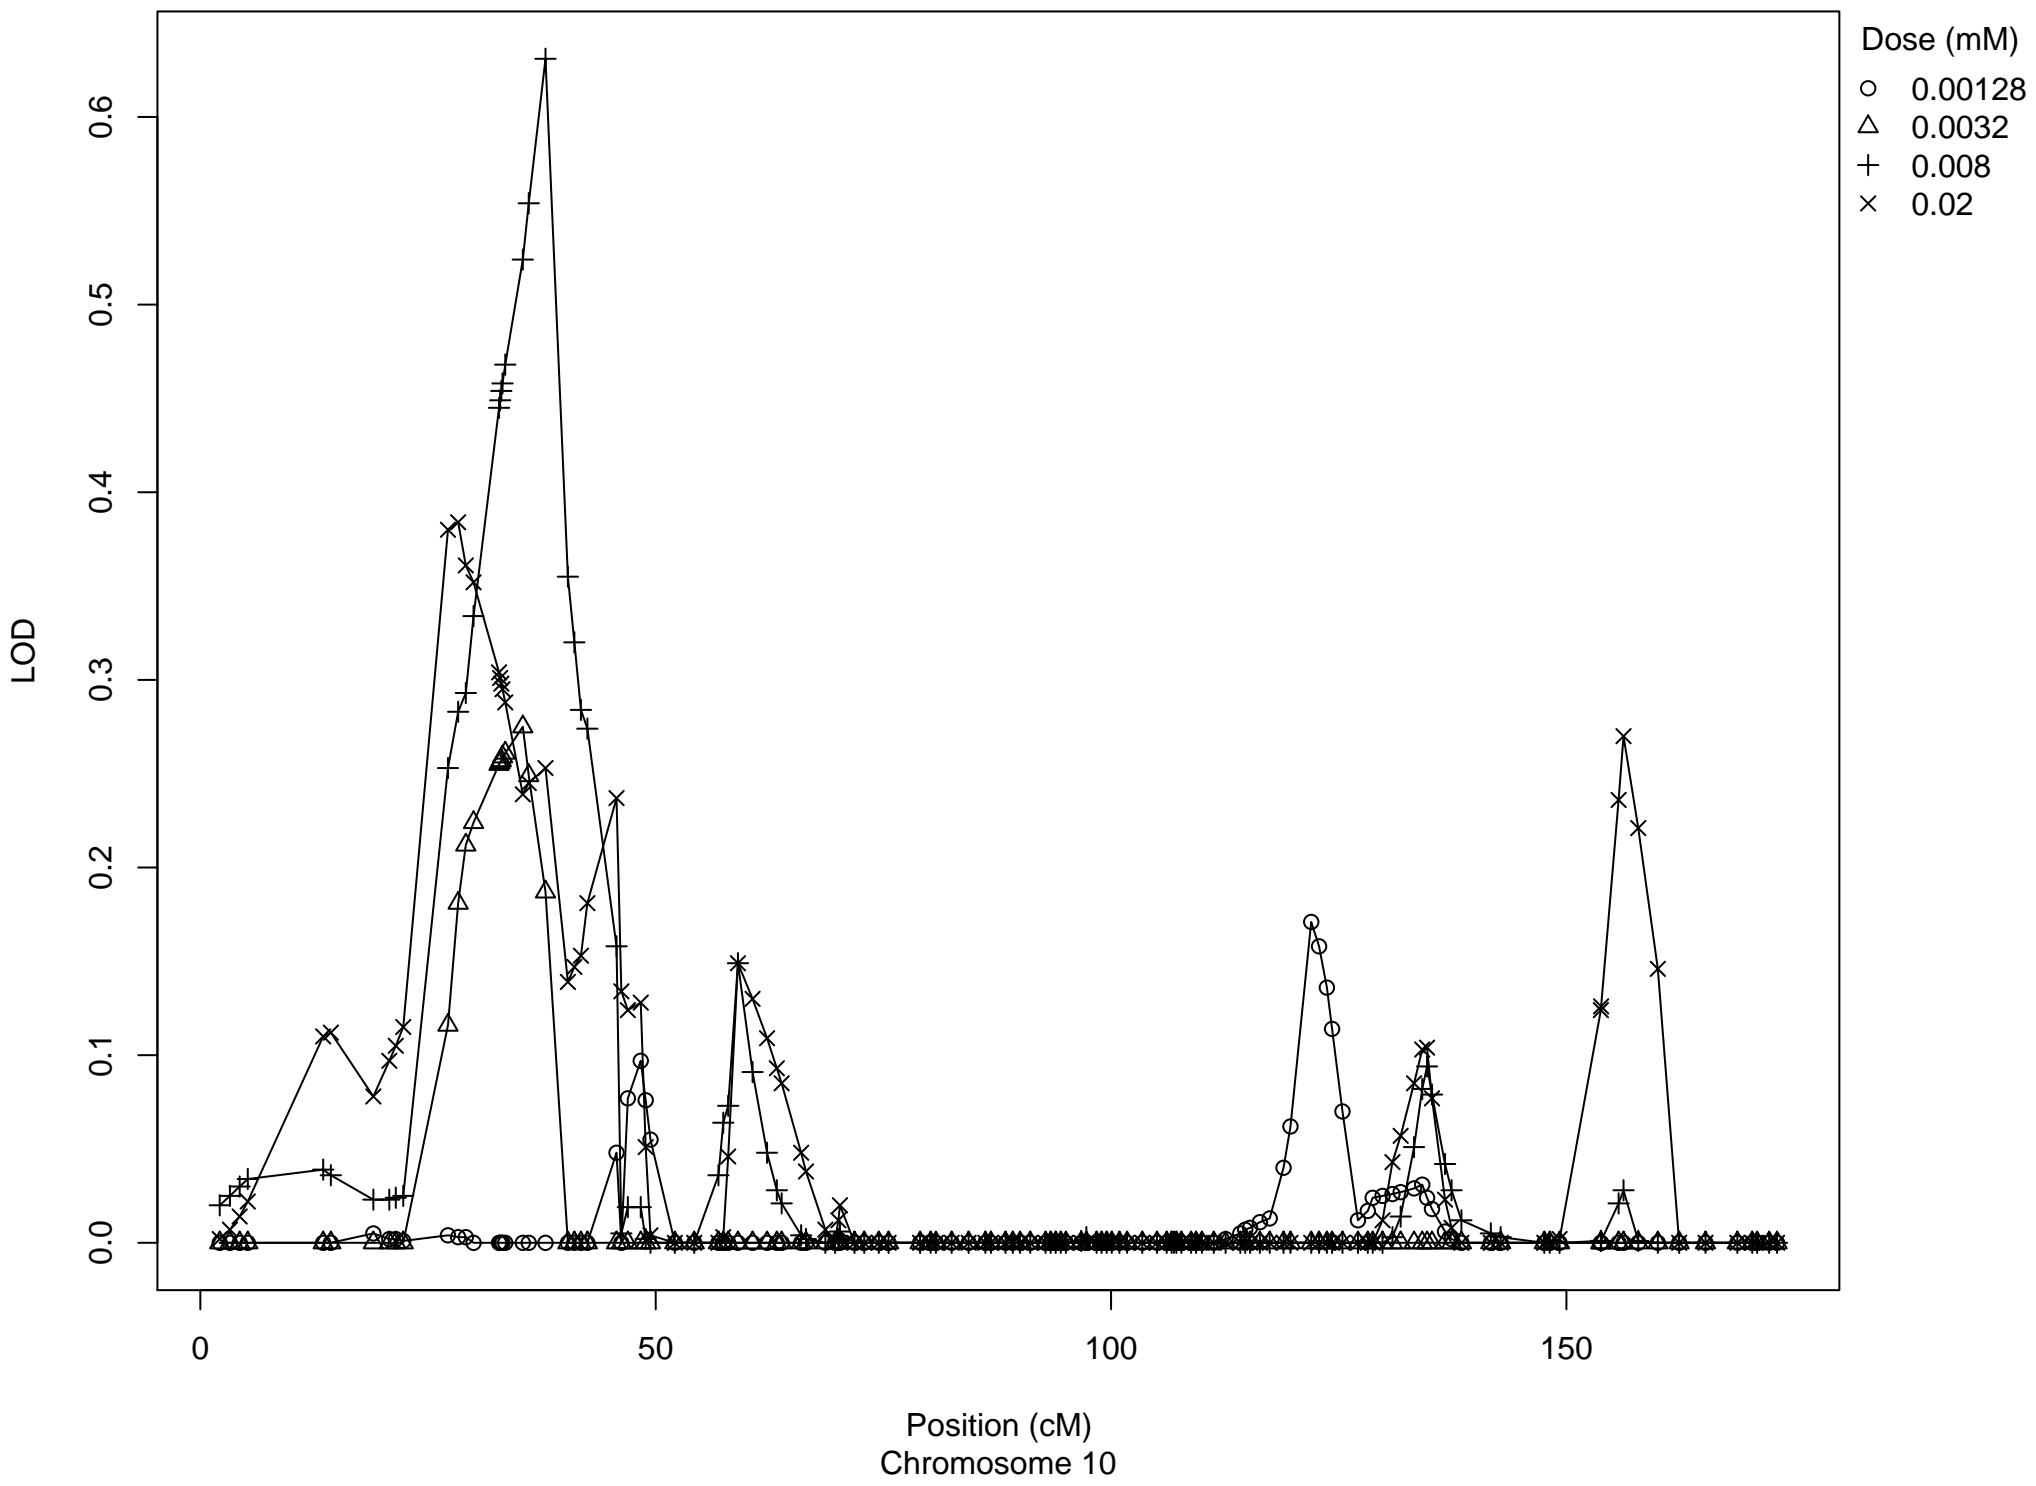

# Carboplatin (Carbo)

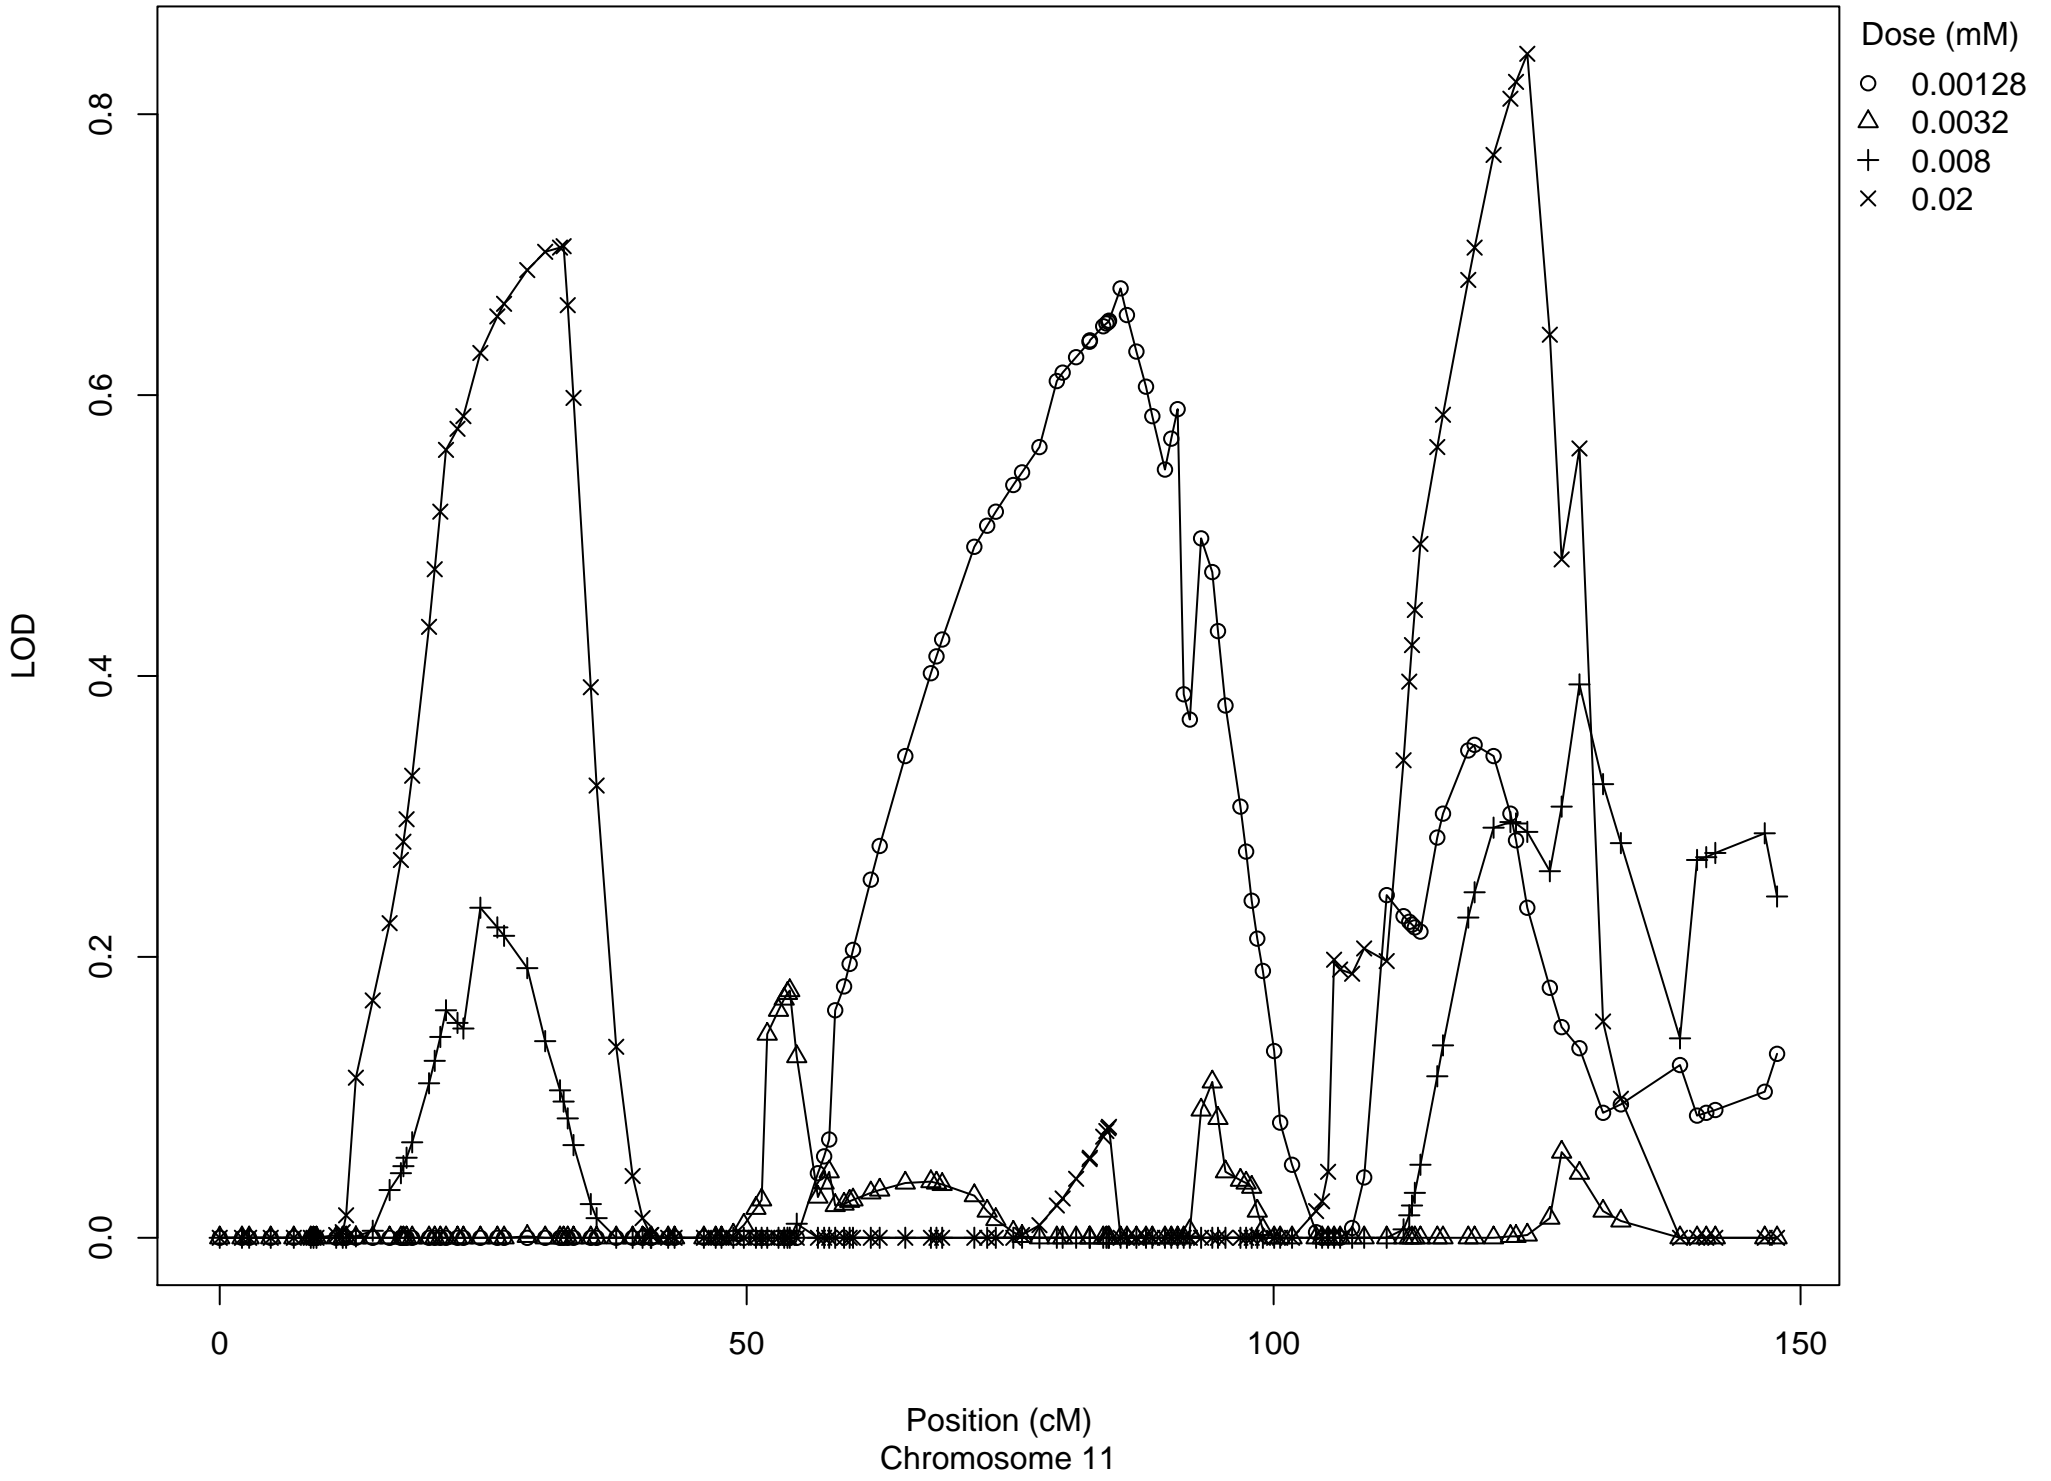

# Carboplatin (Carbo)

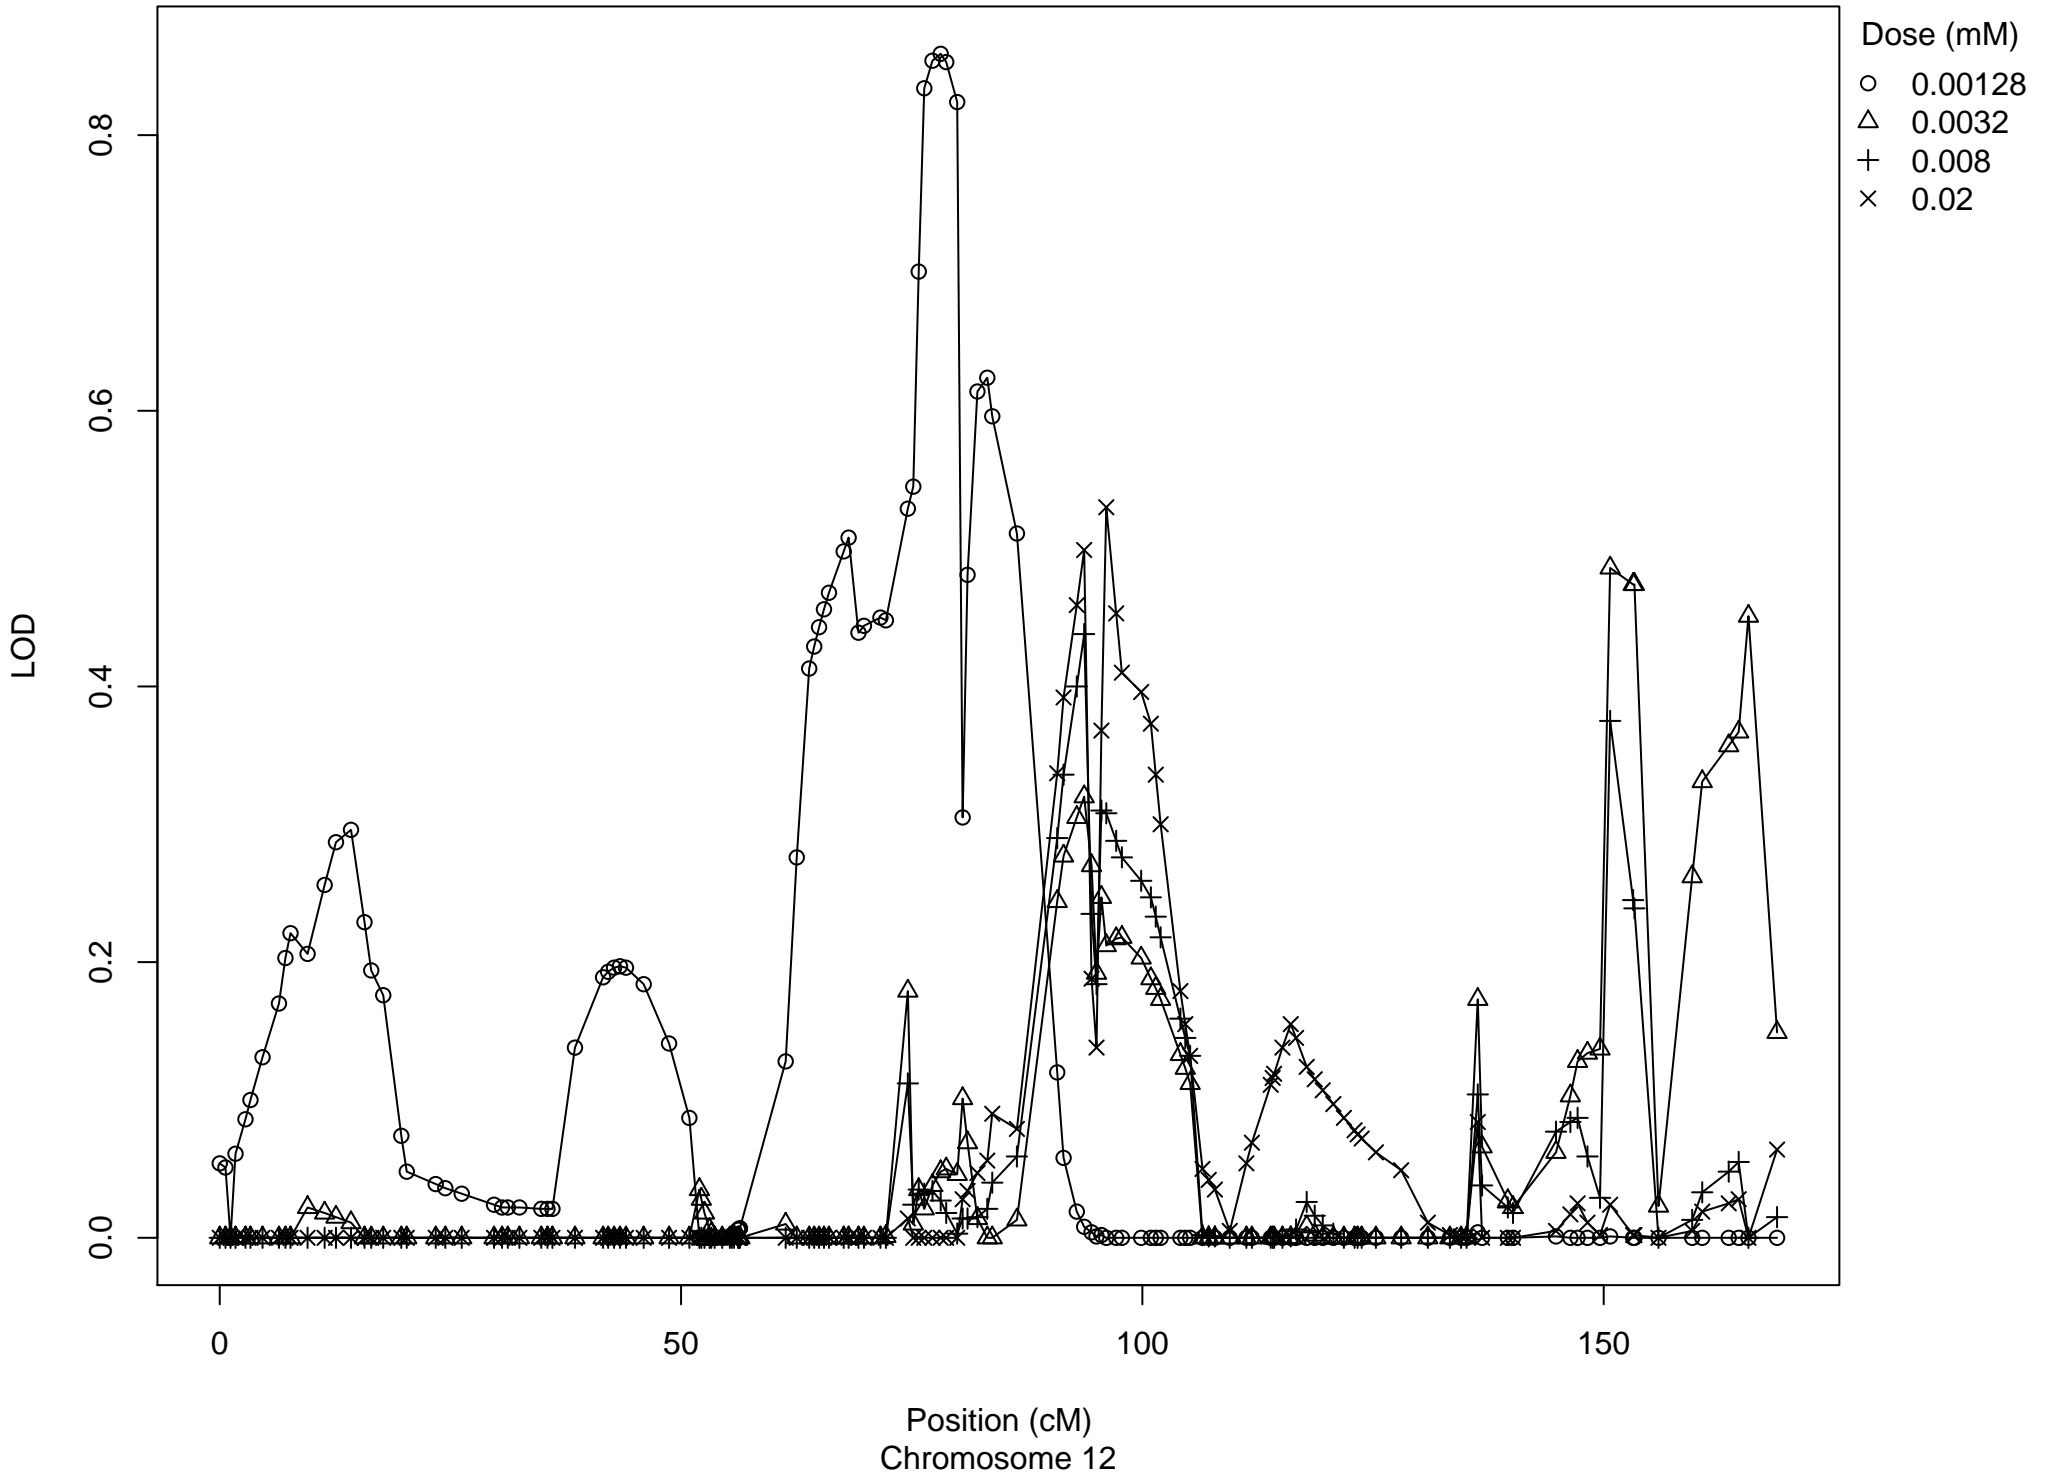

# Carboplatin (Carbo)

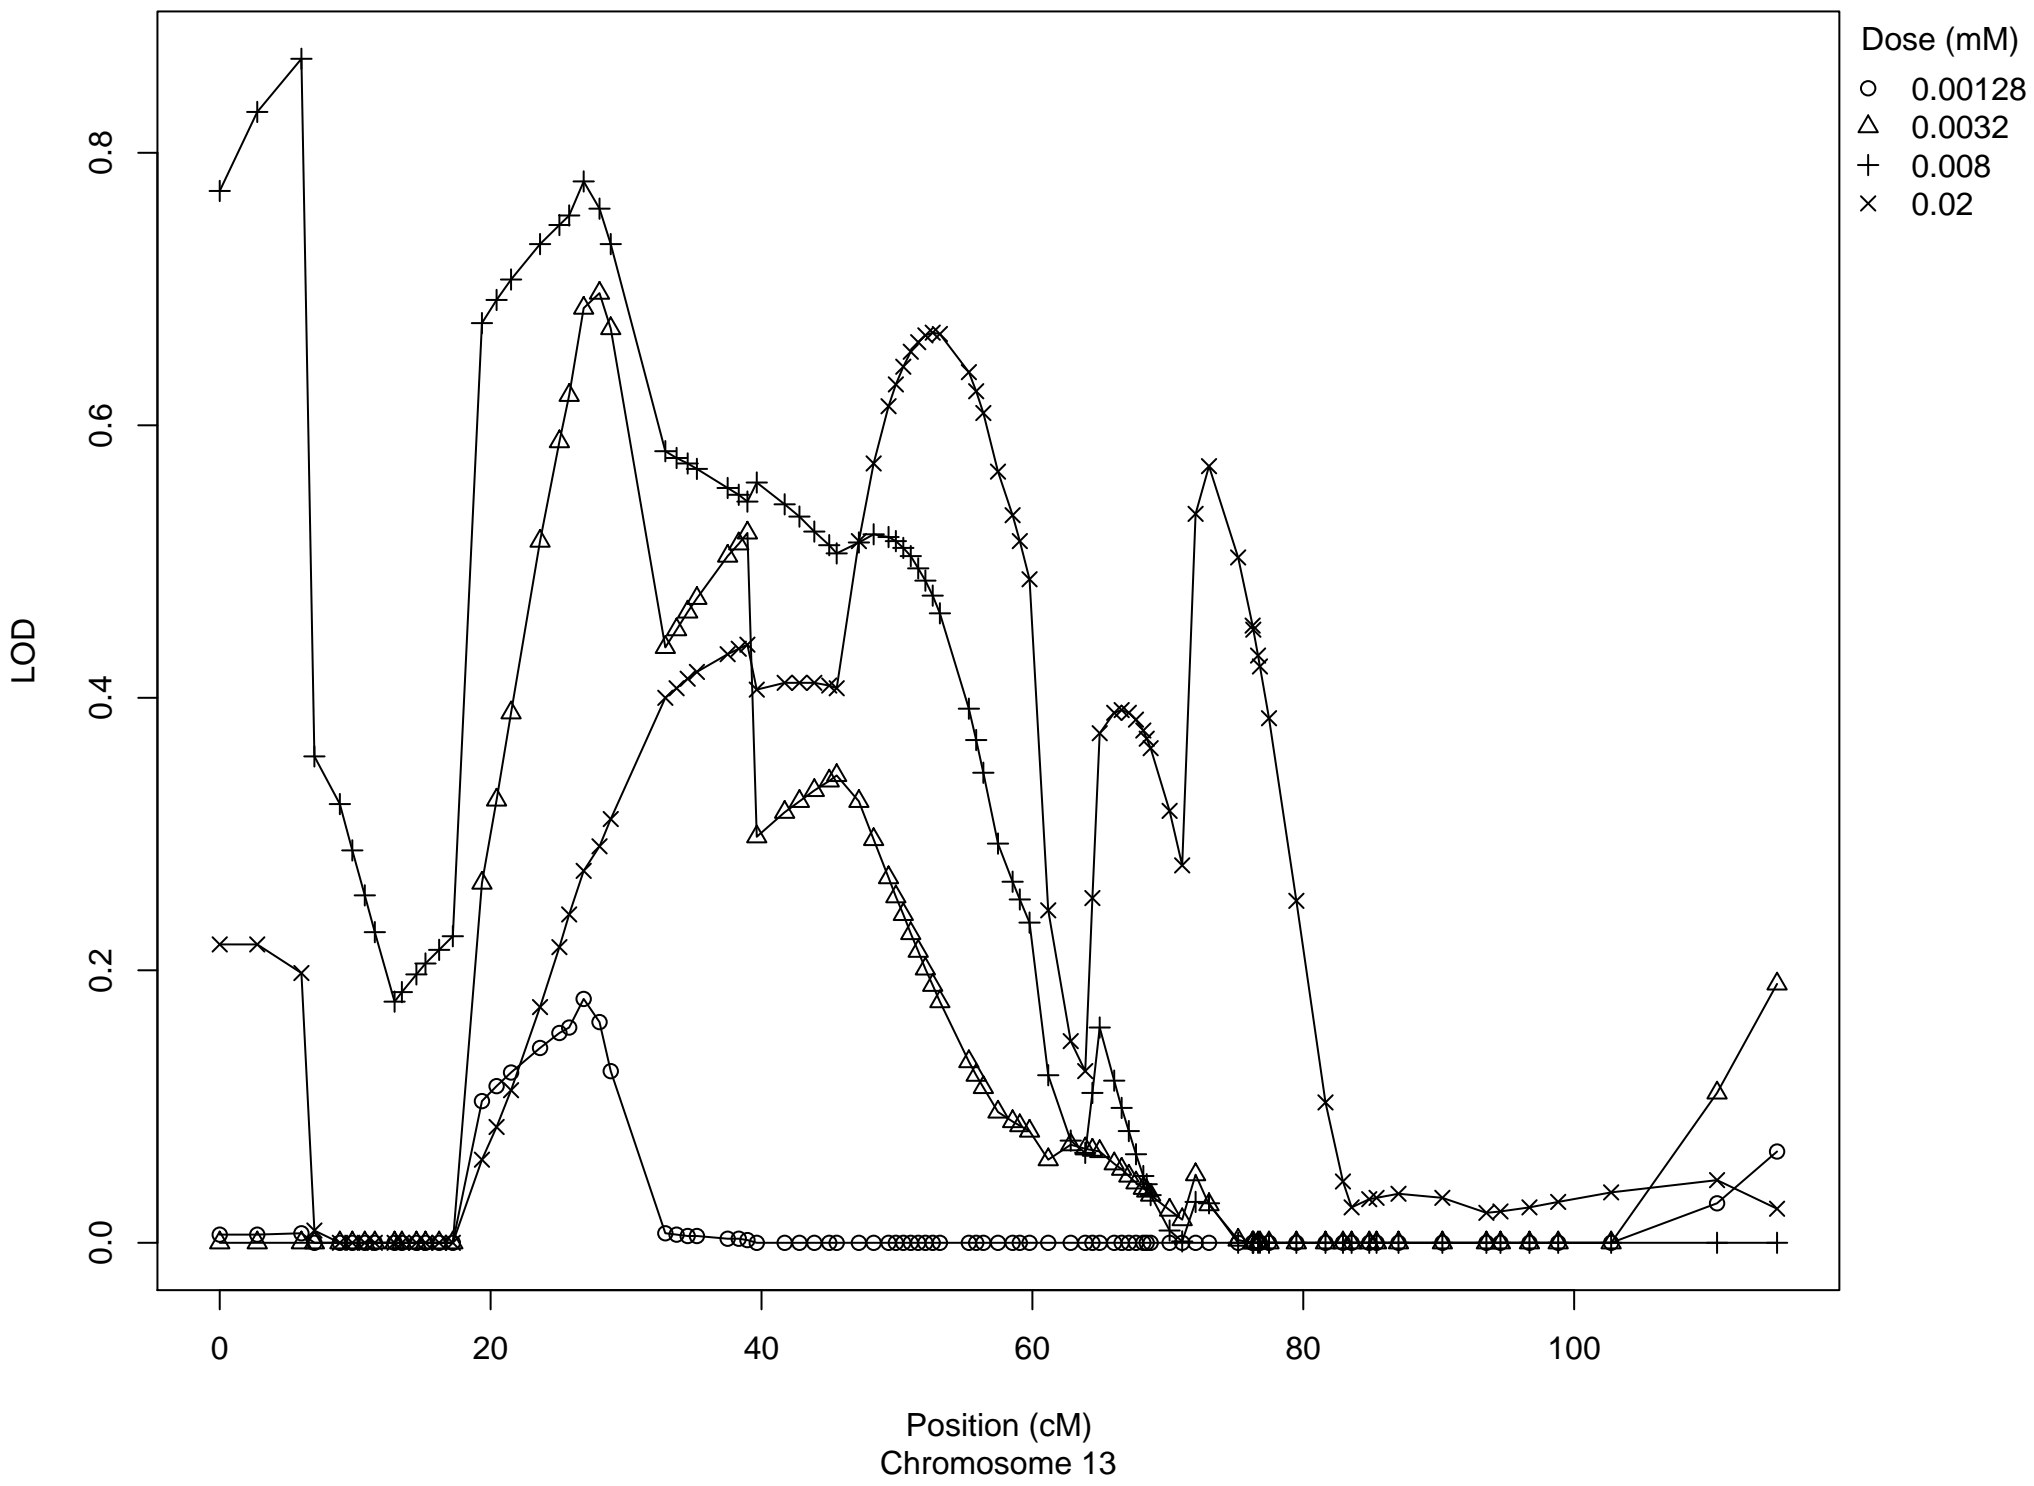

# Carboplatin (Carbo)

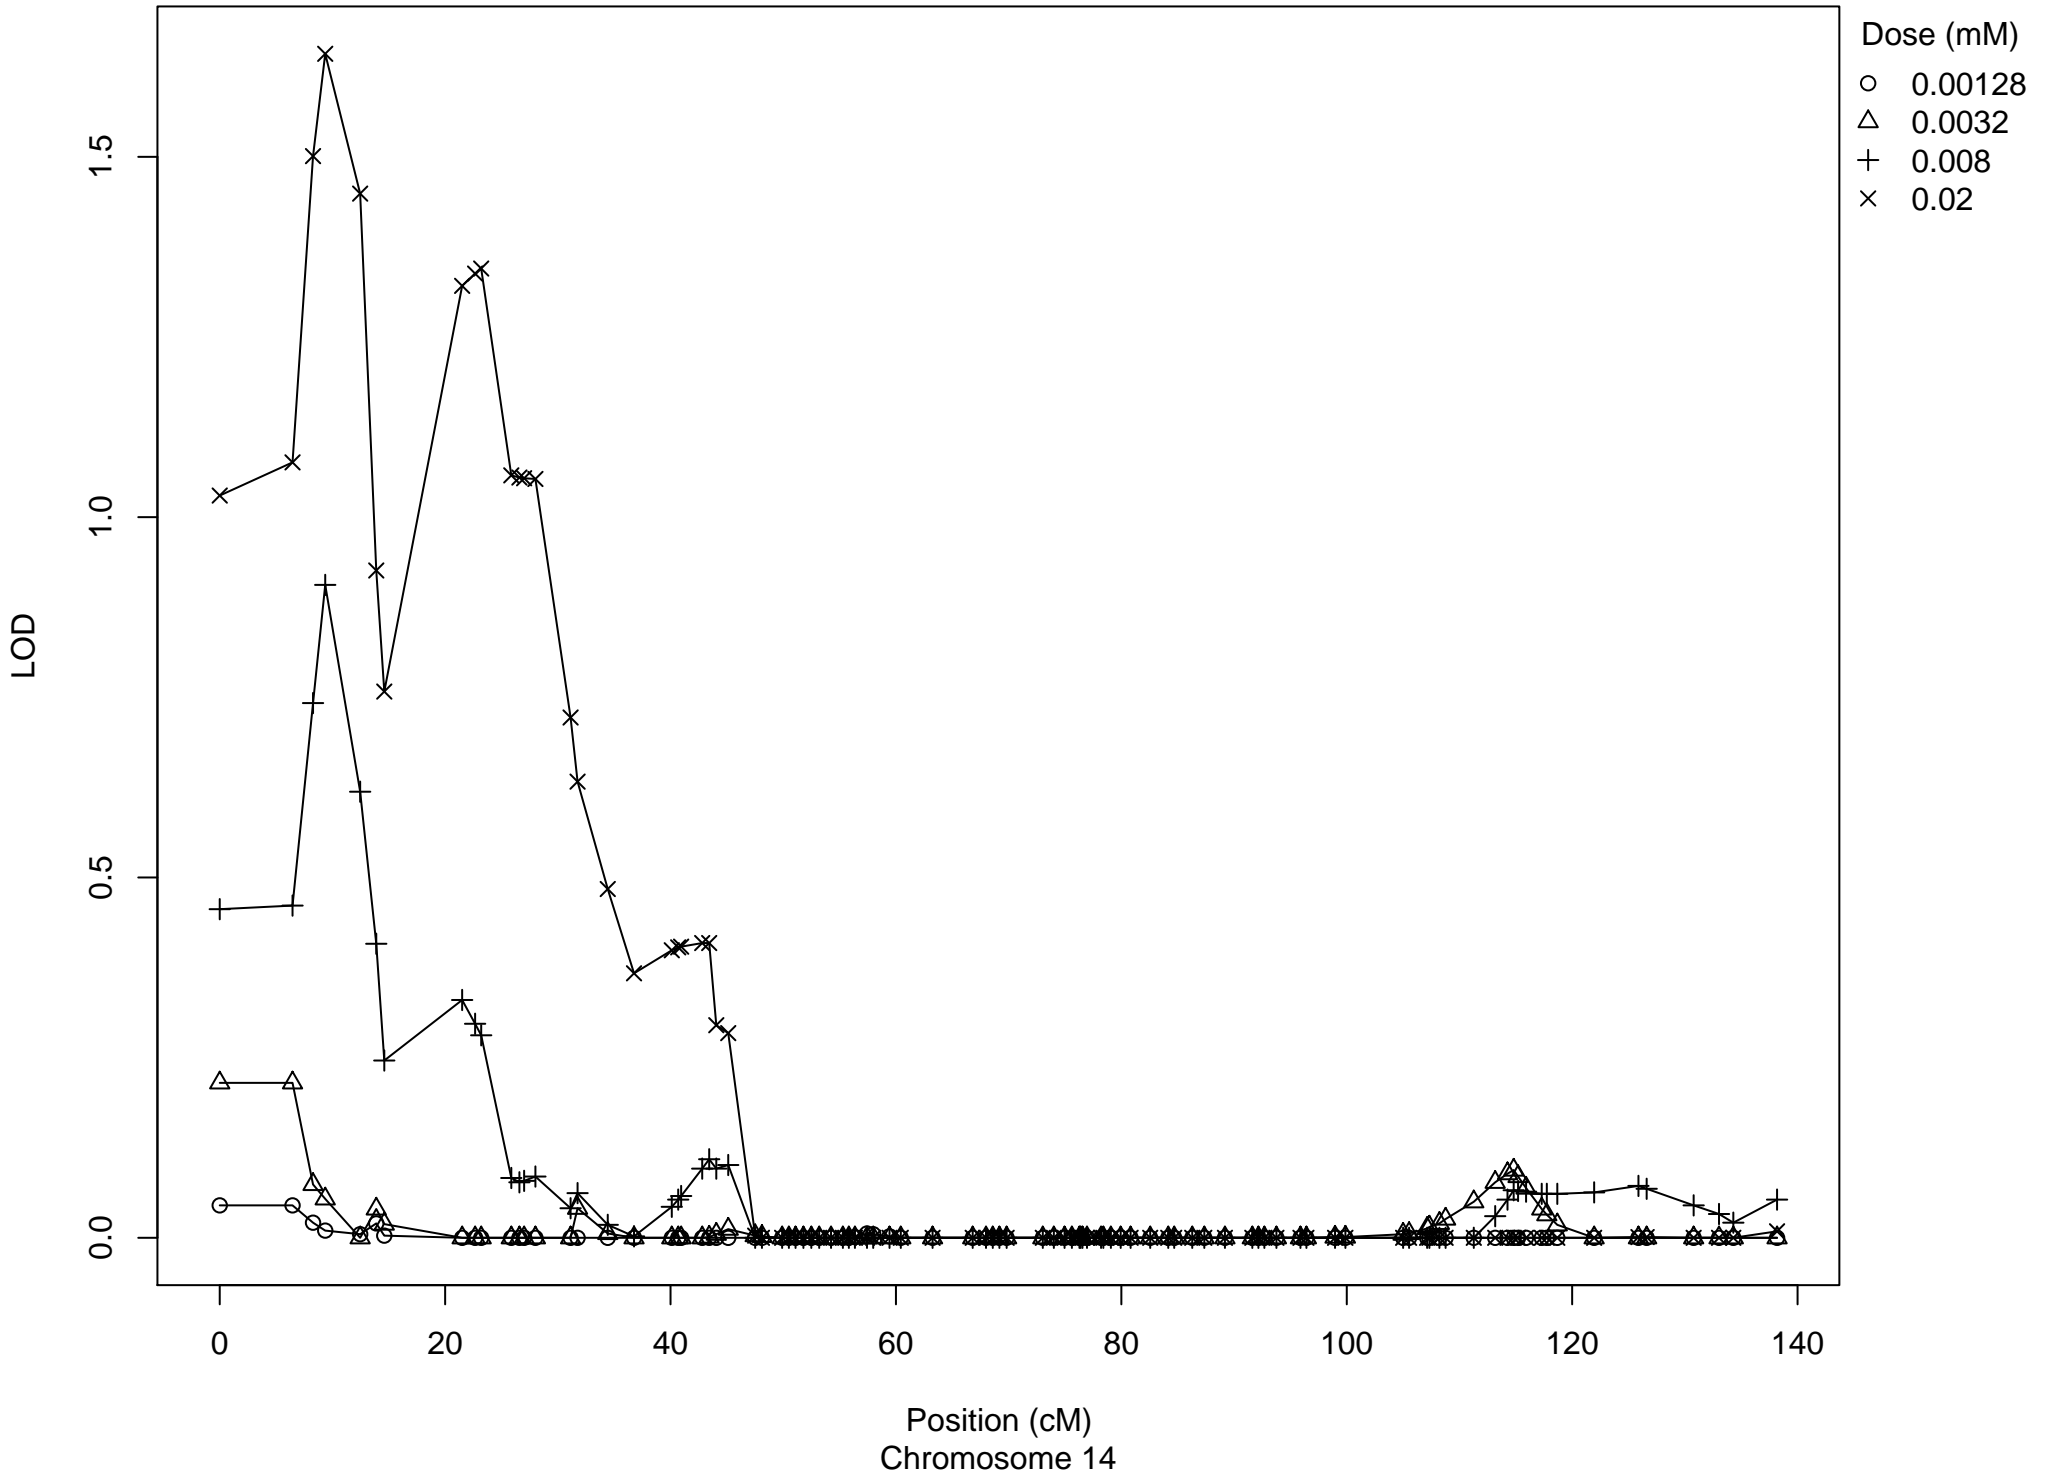

# Carboplatin (Carbo)

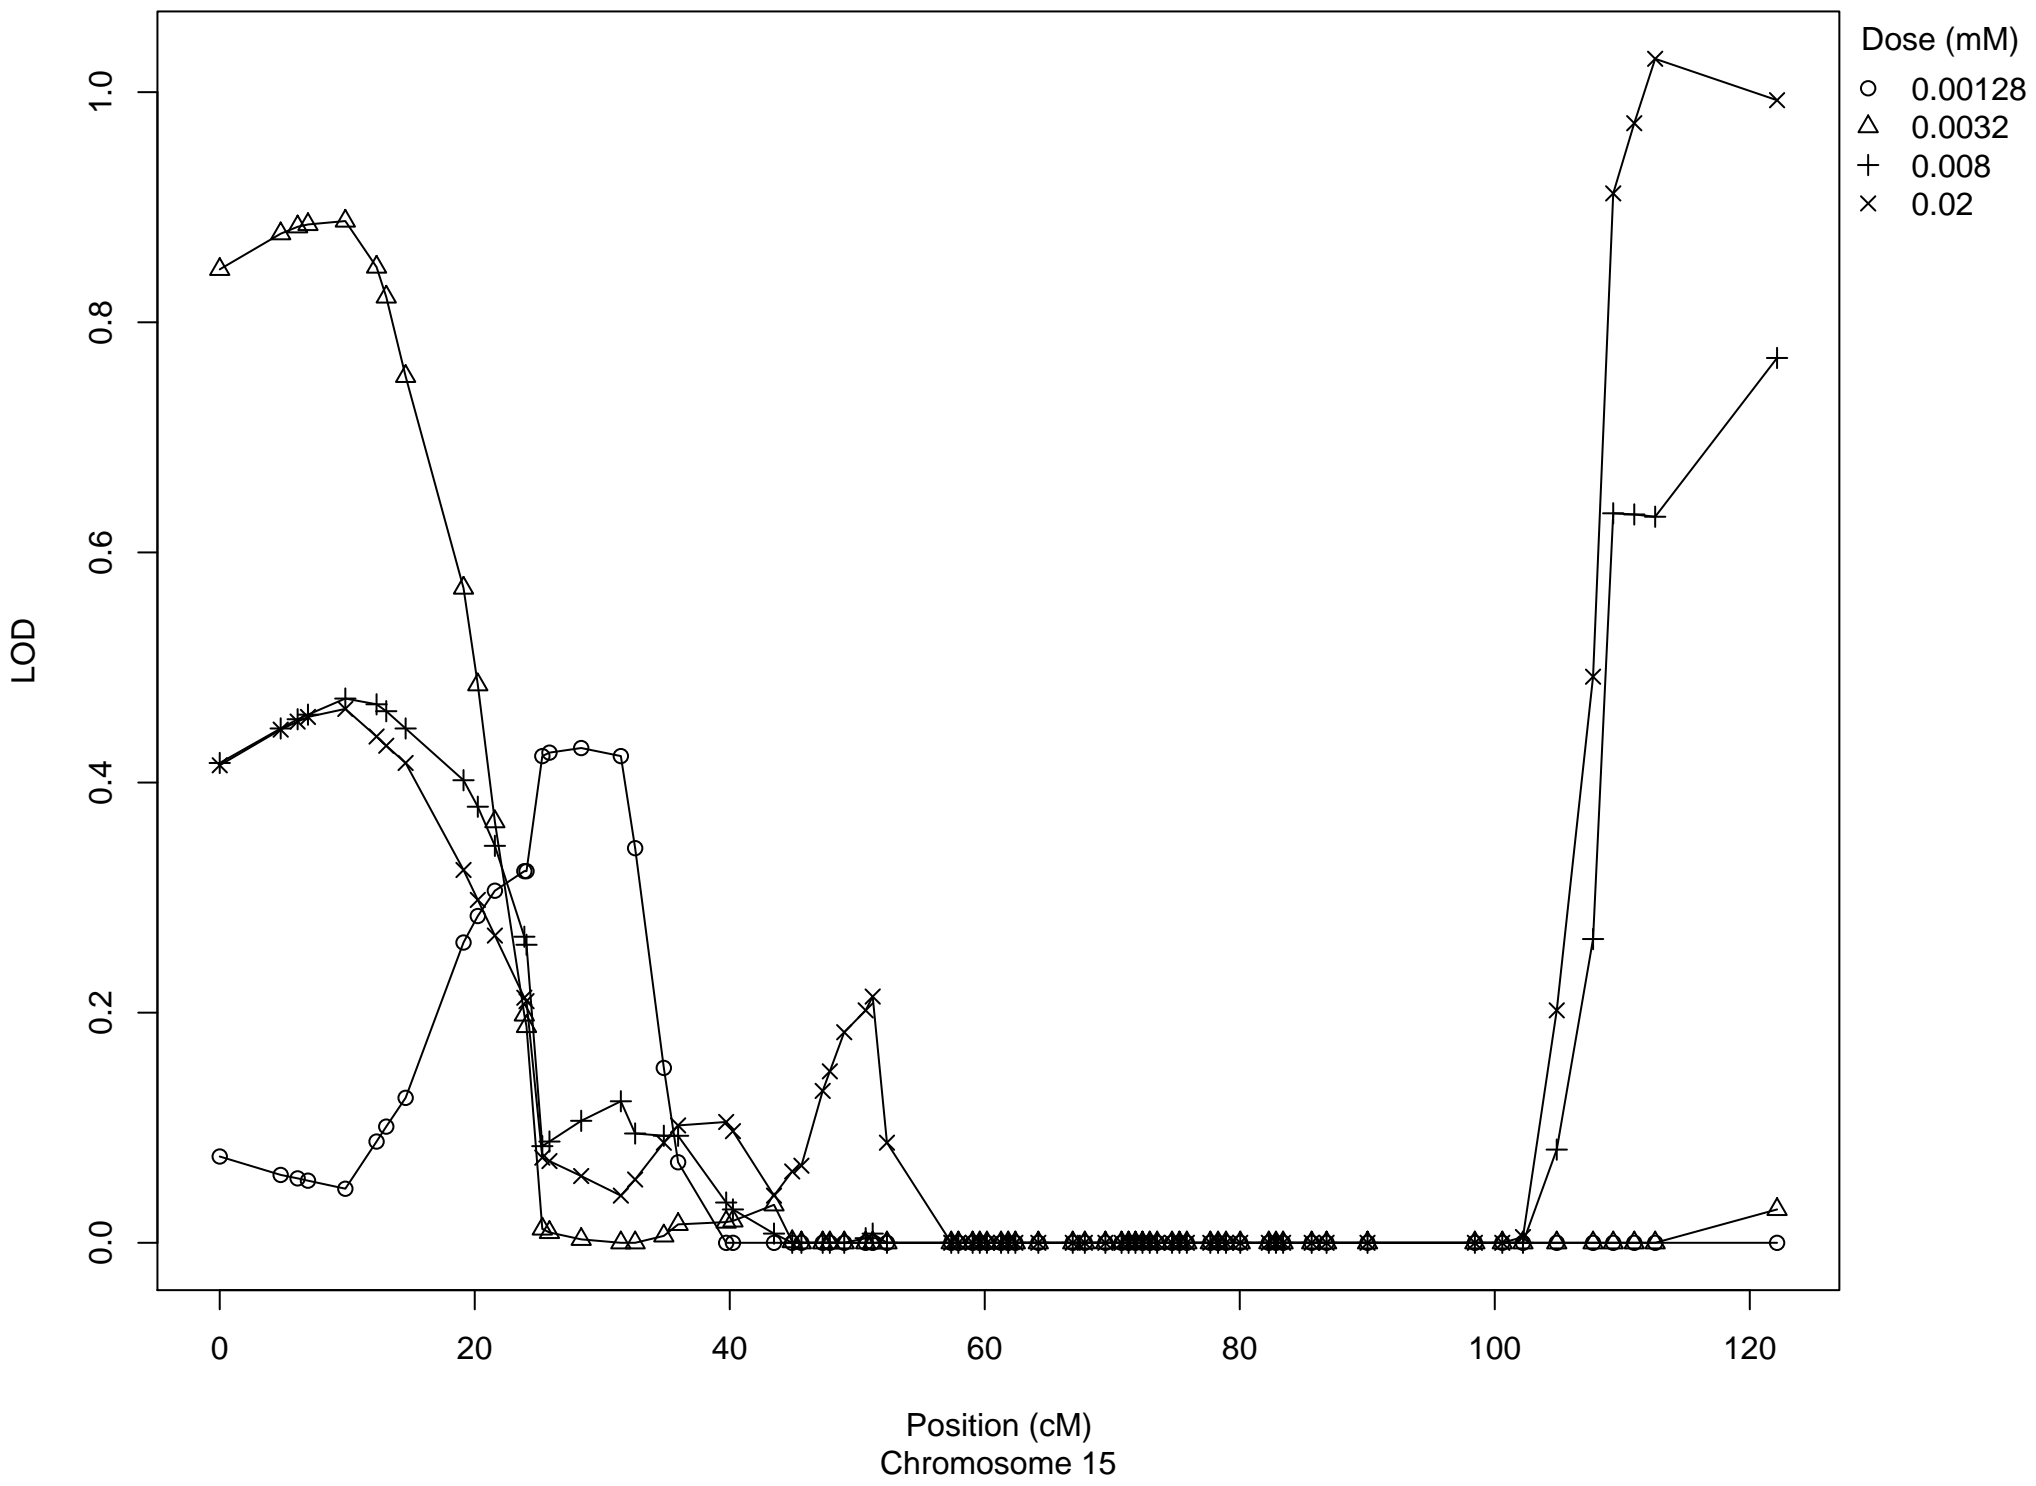

# Carboplatin (Carbo)

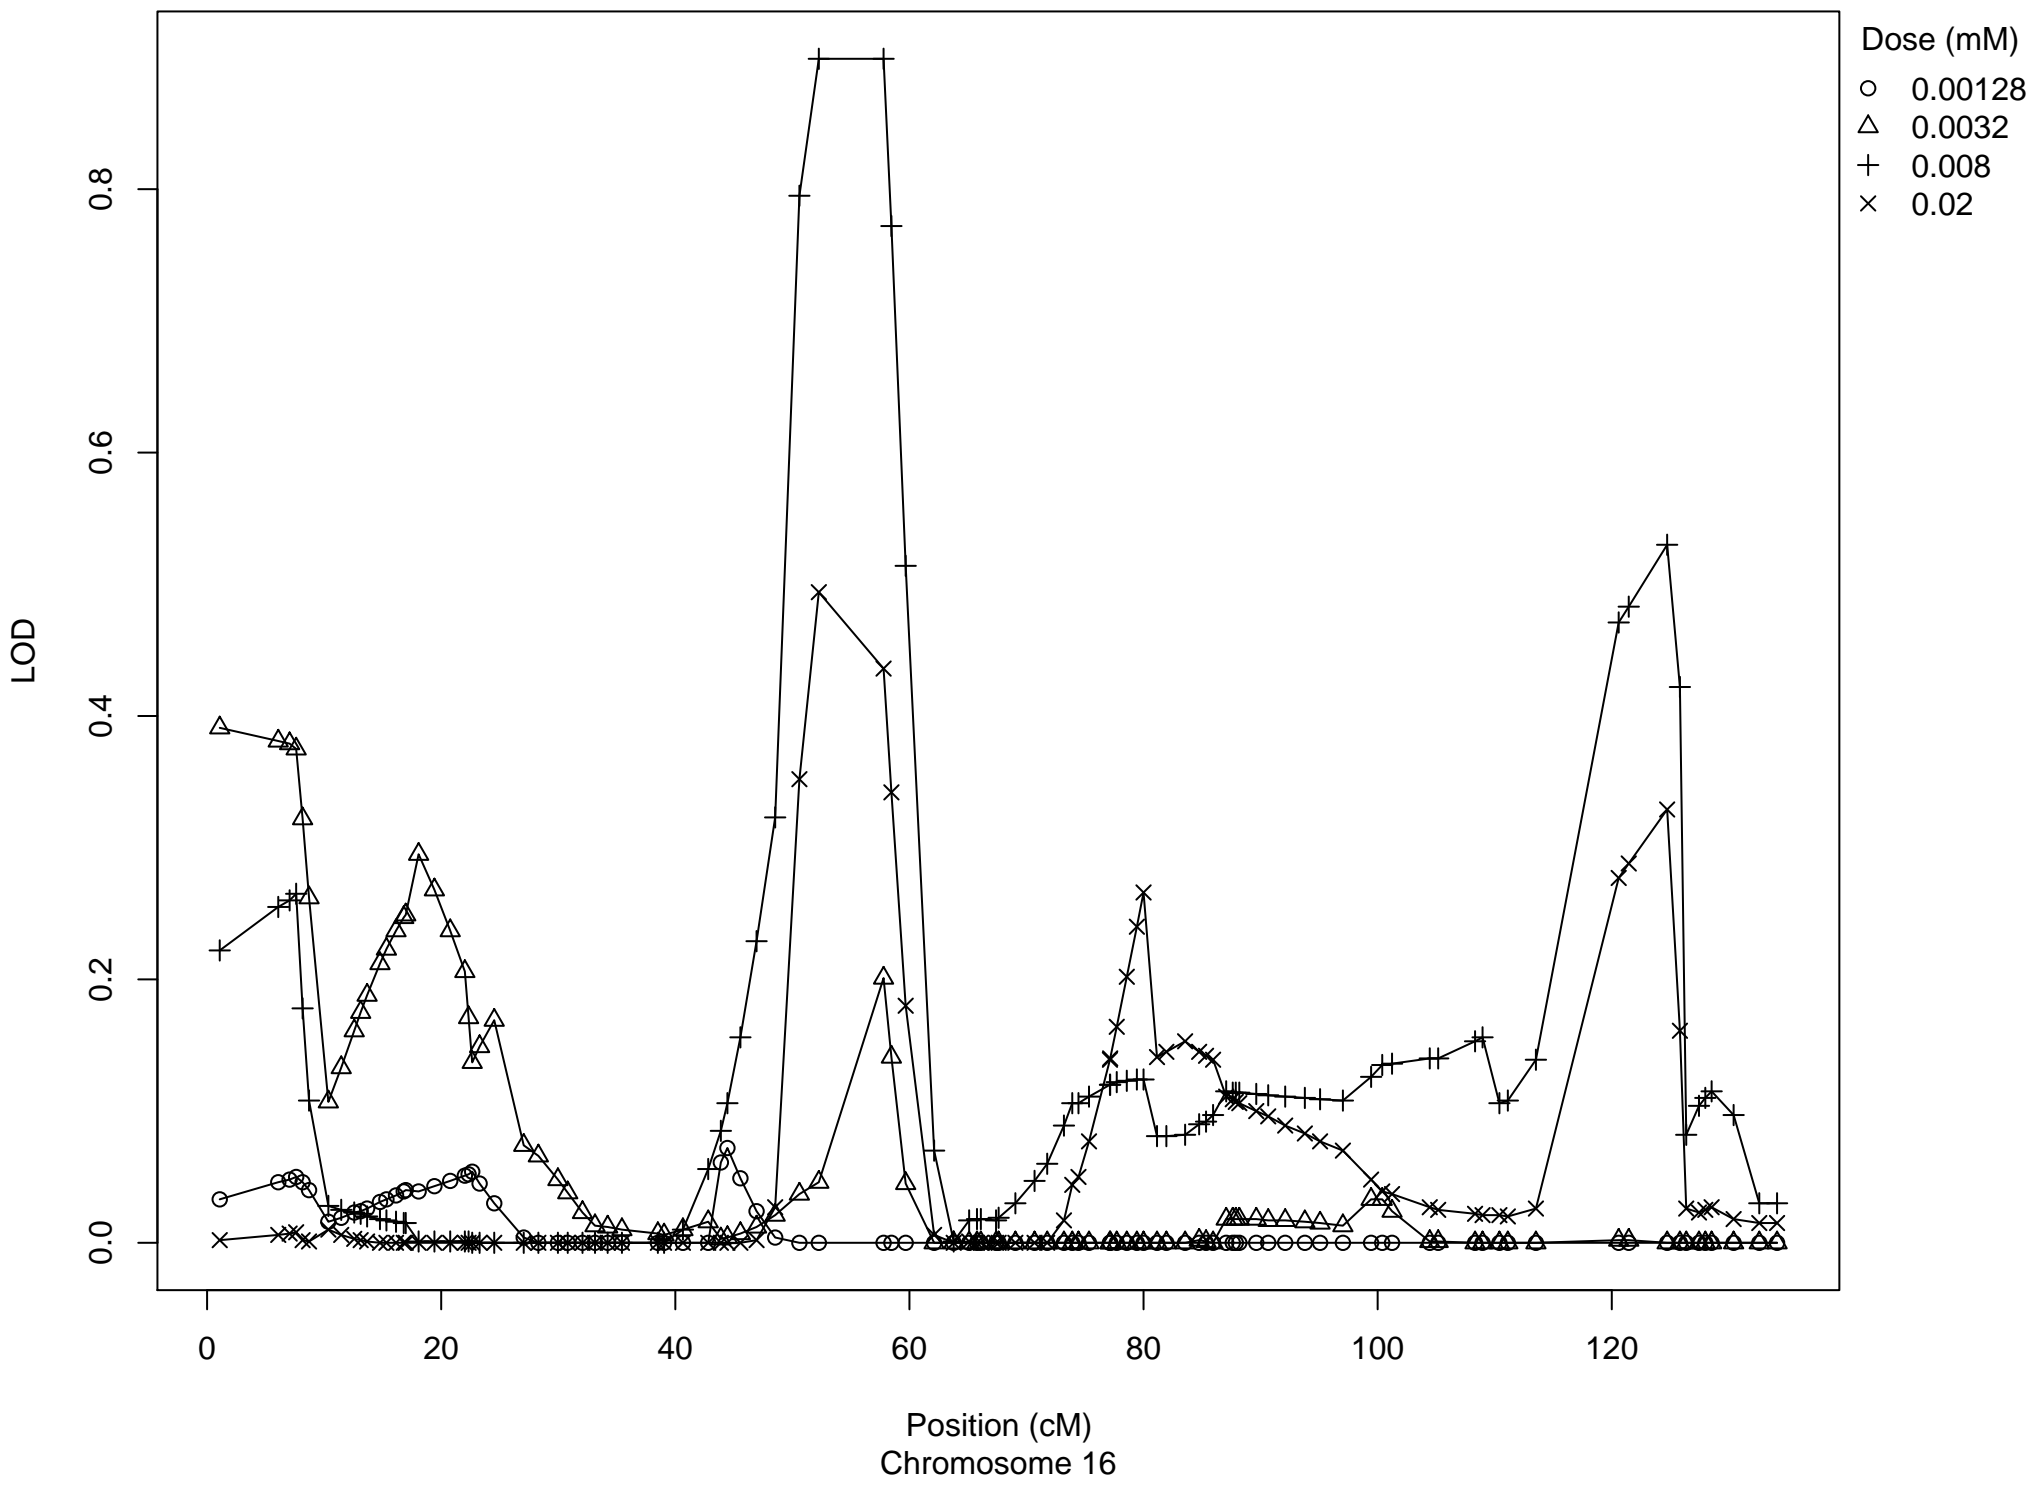



# Carboplatin (Carbo)

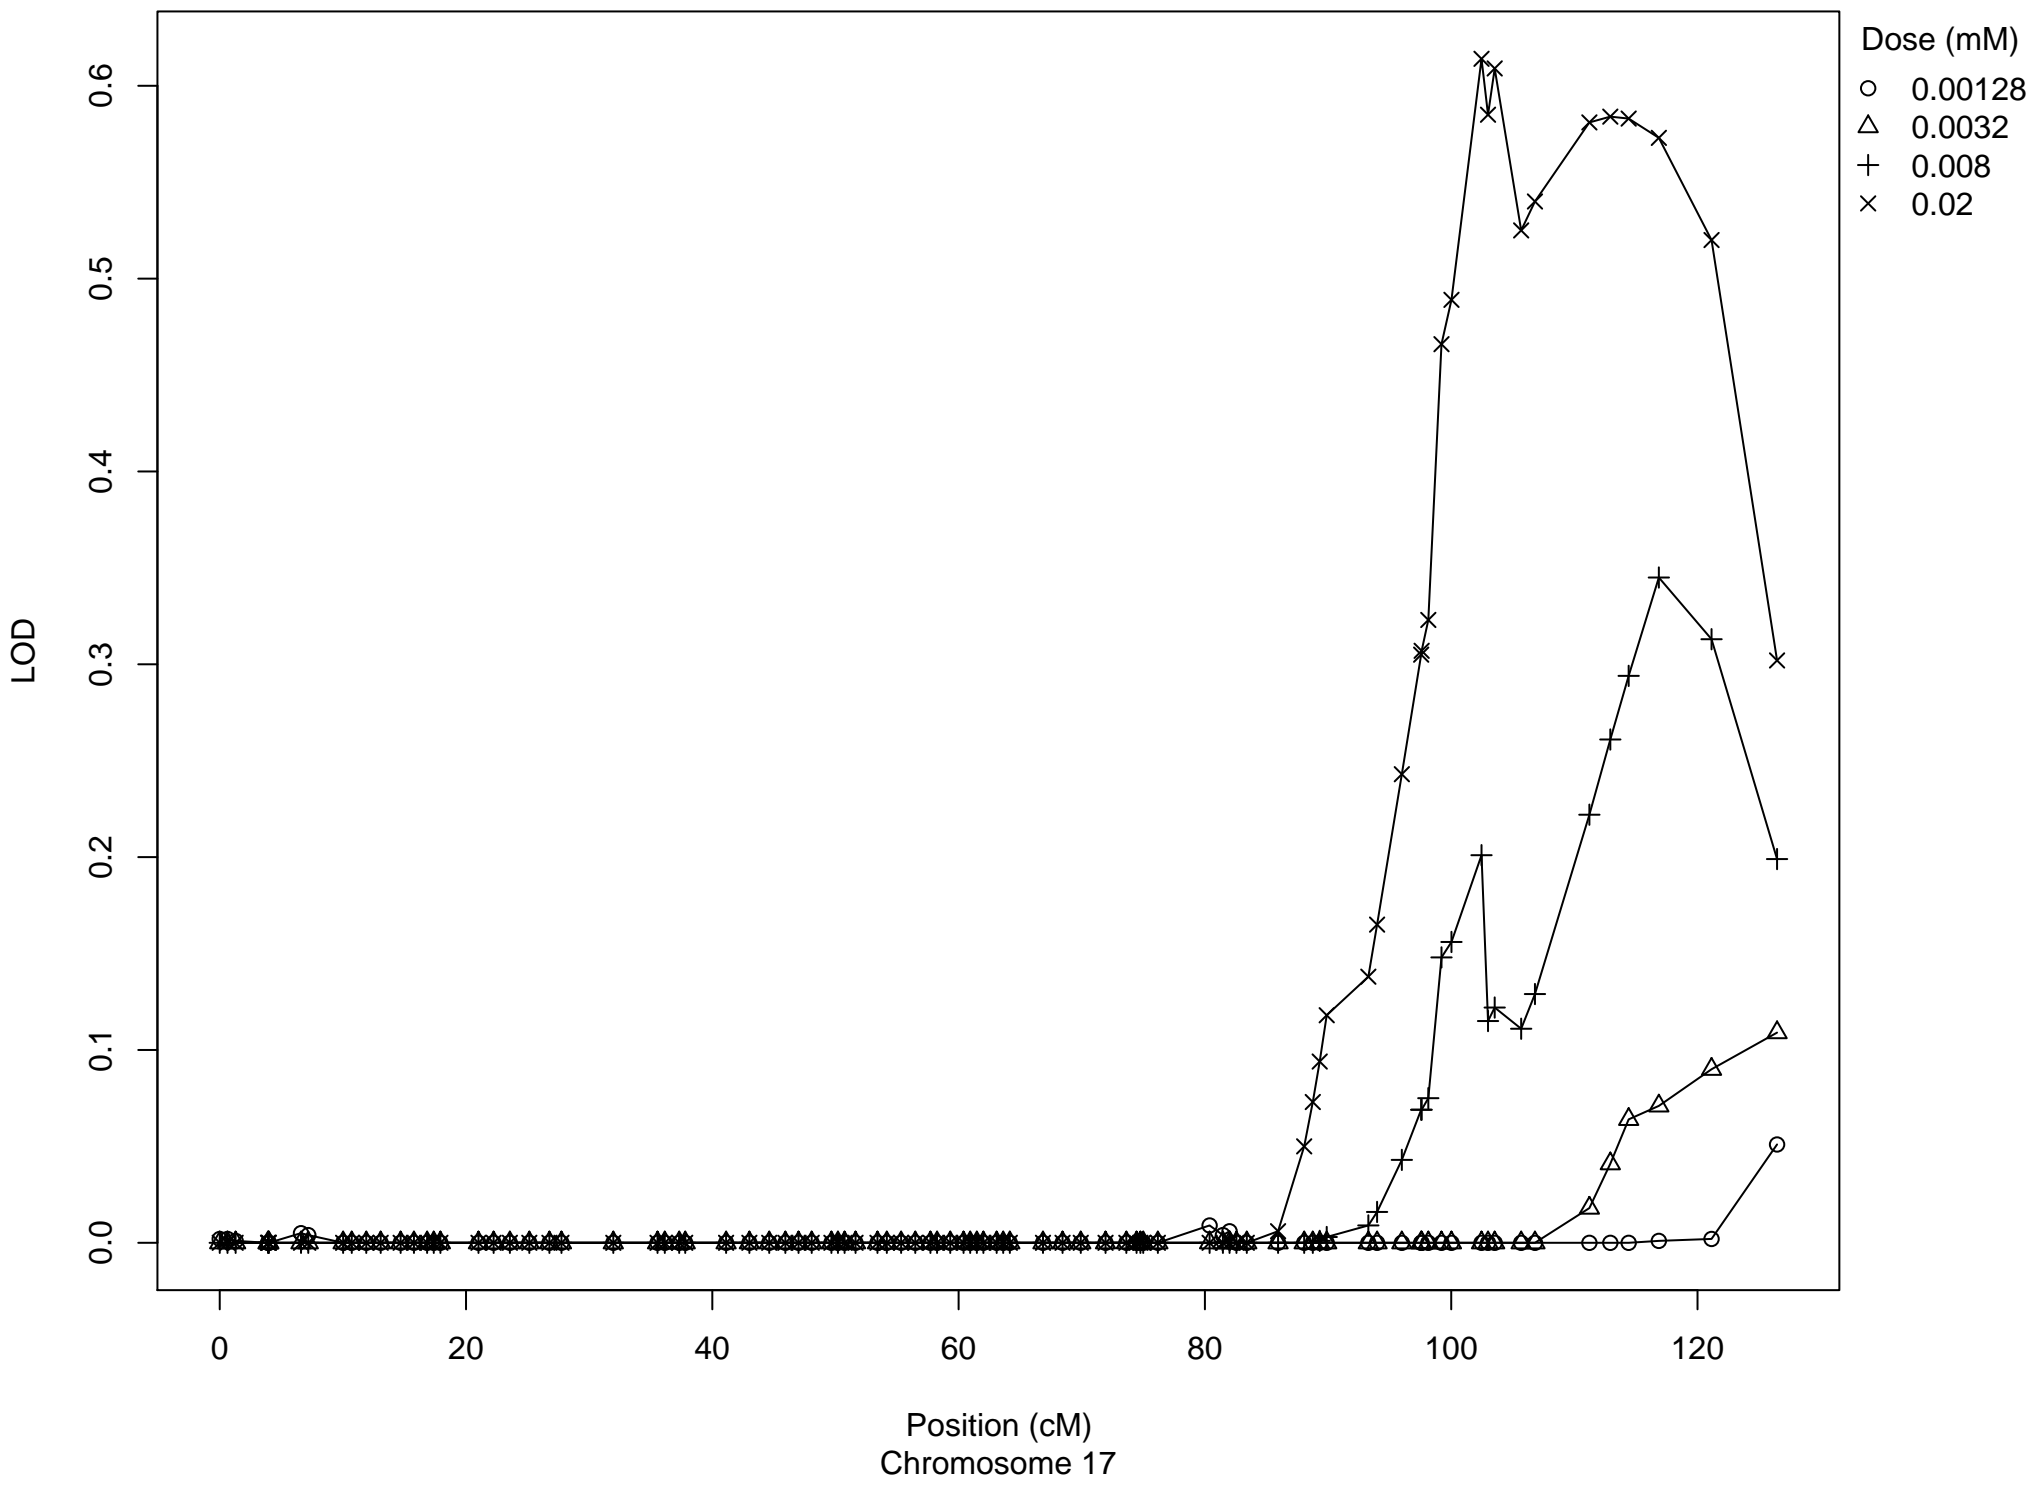

# Carboplatin (Carbo)

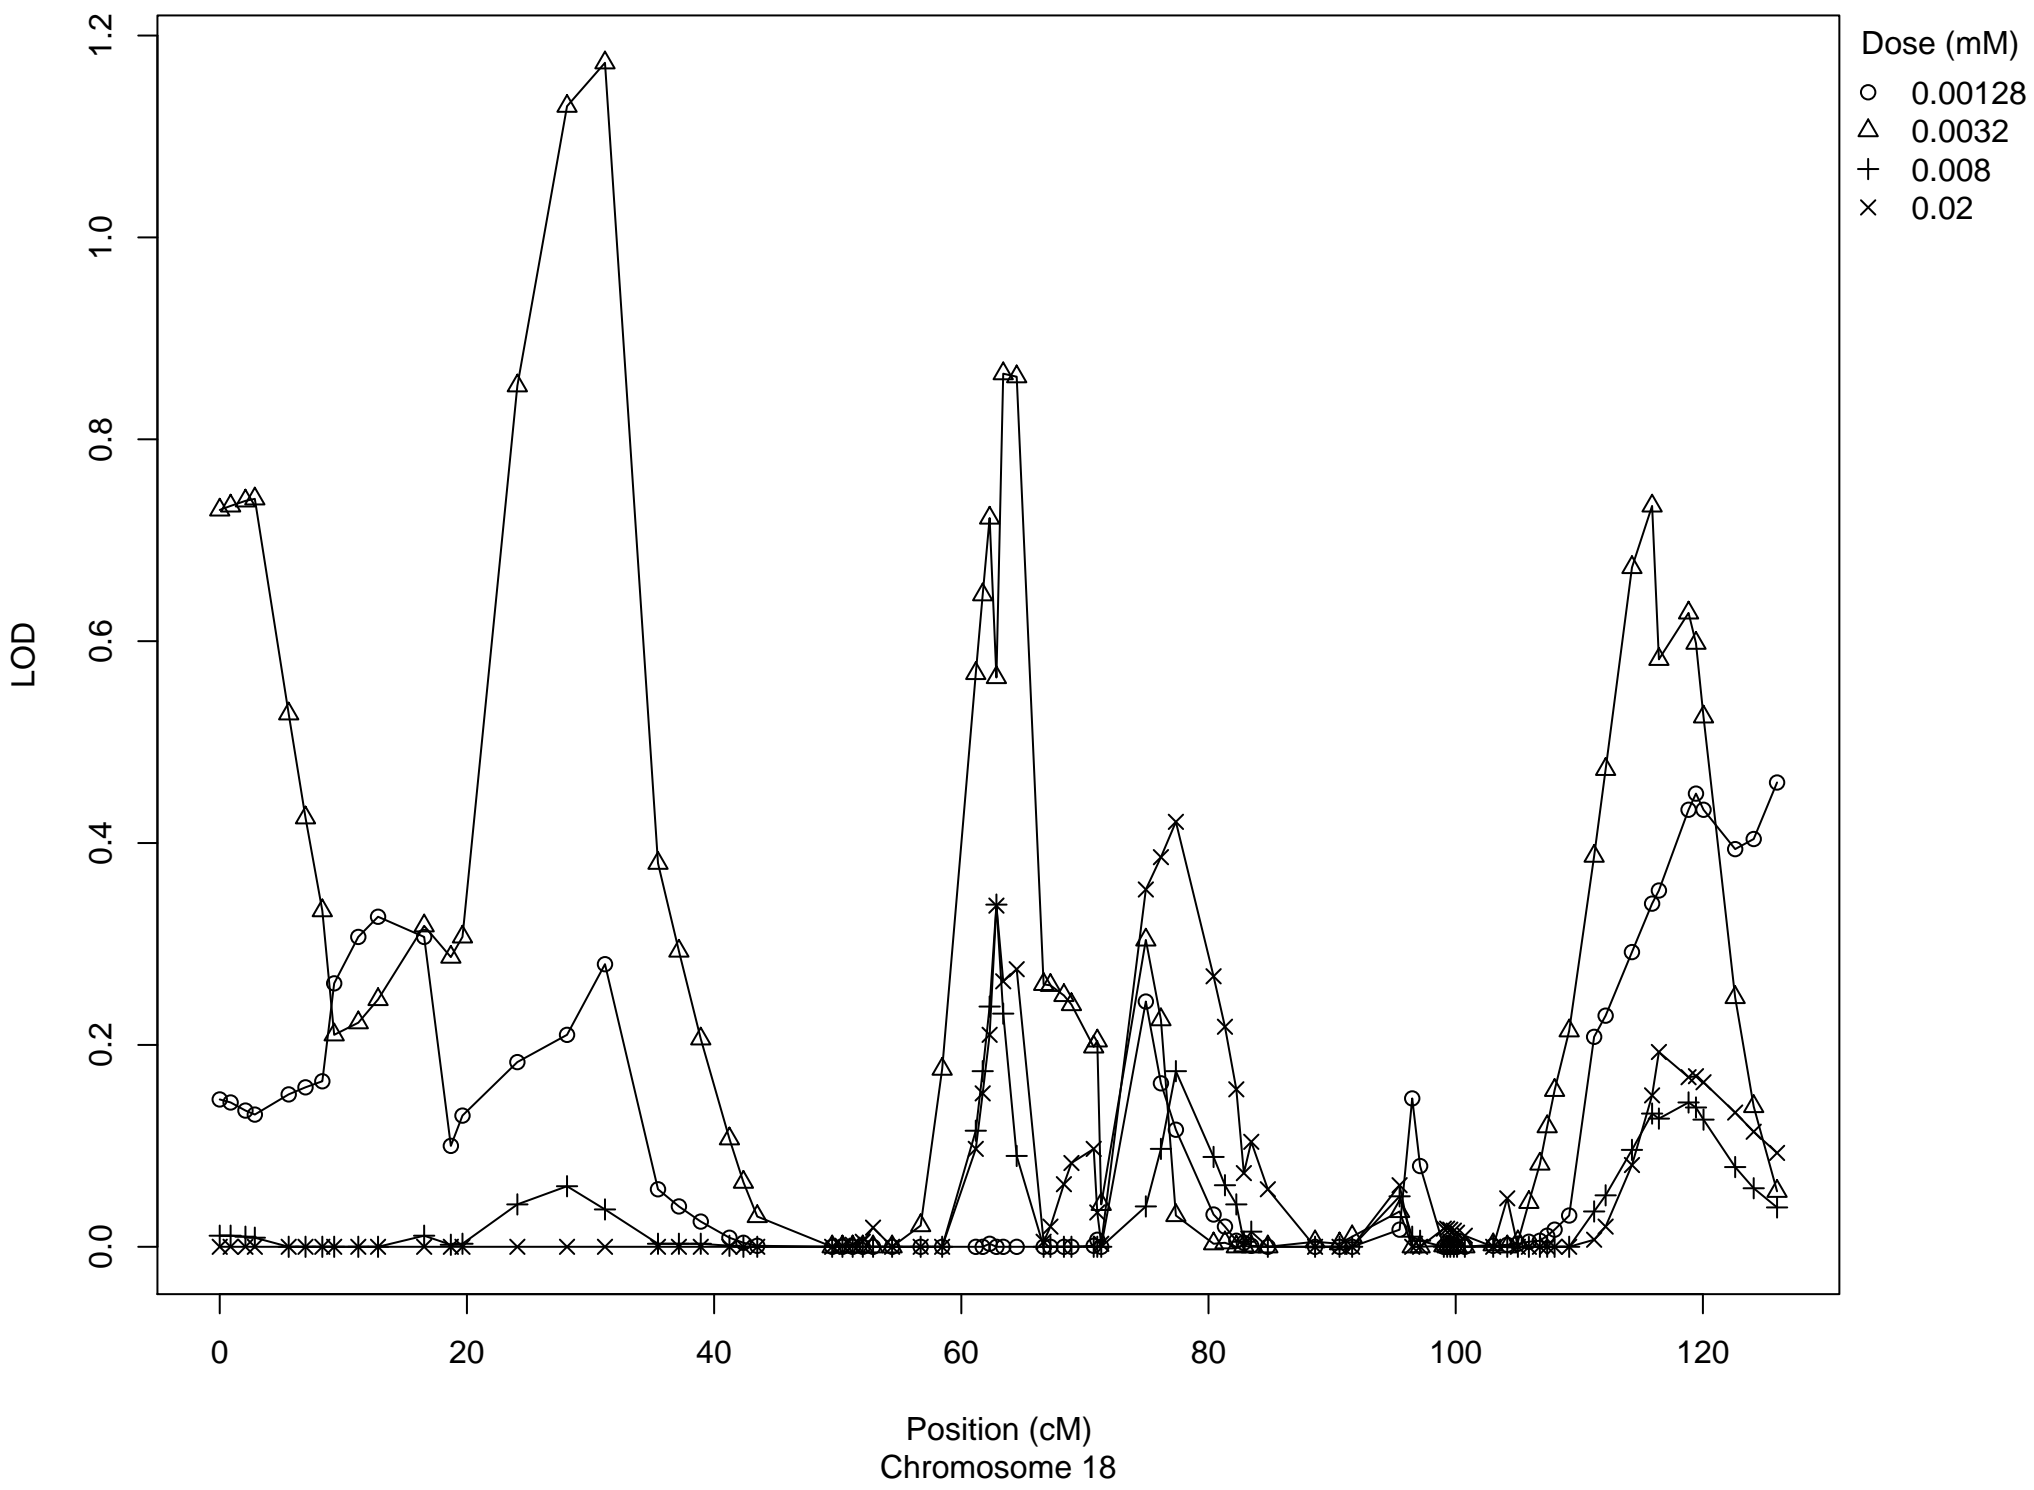

# Carboplatin (Carbo)

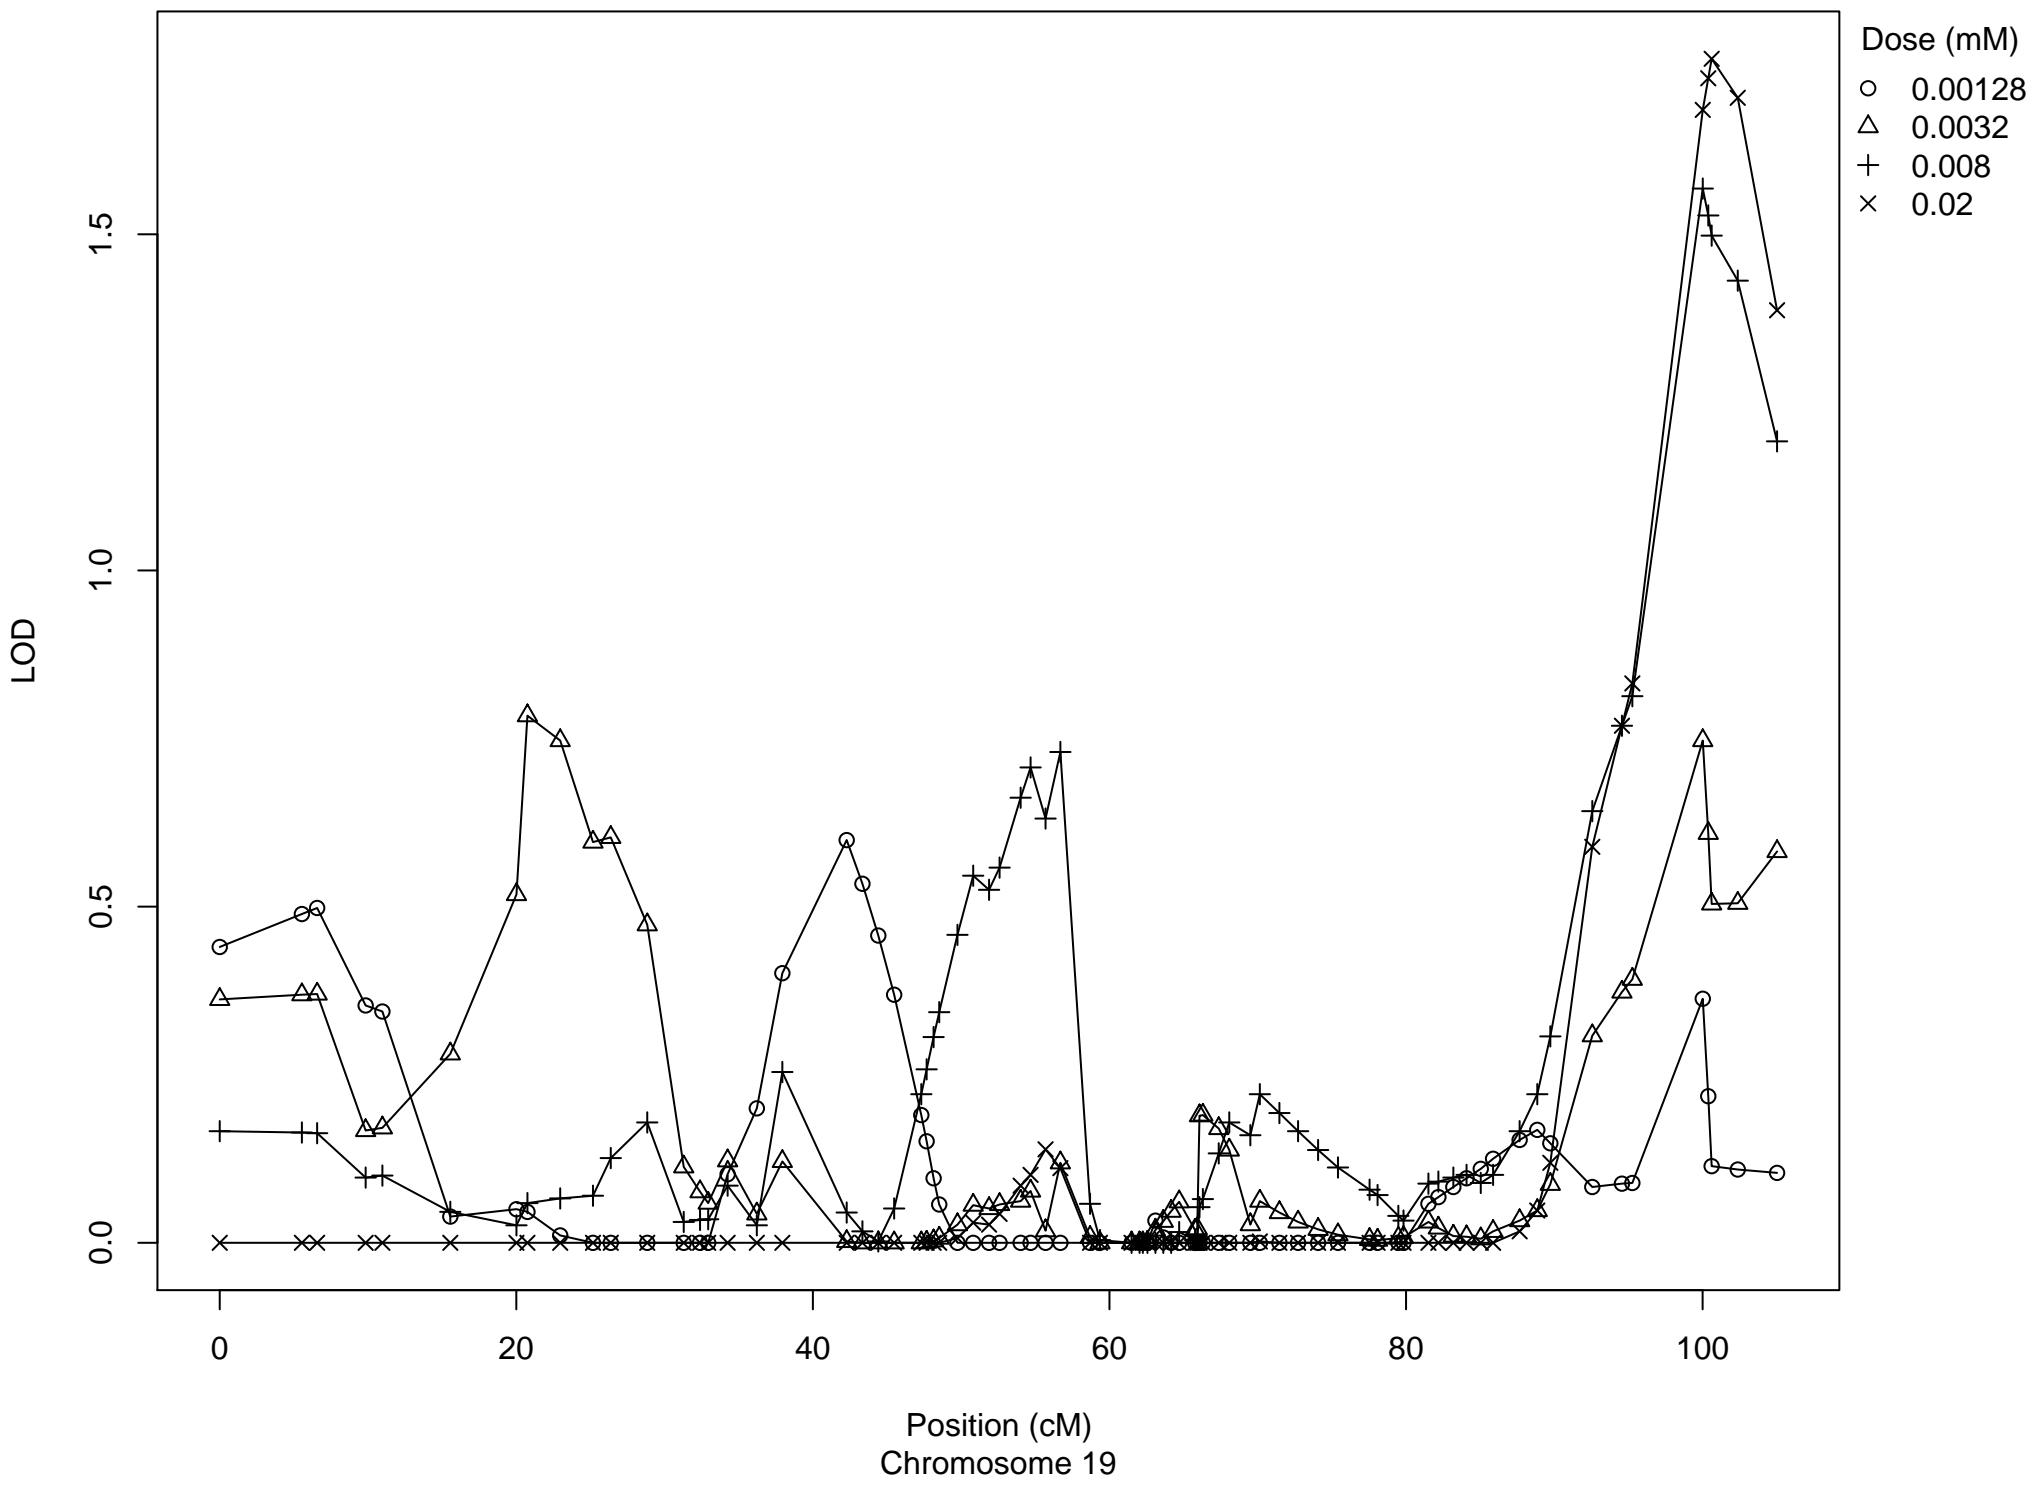

# Carboplatin (Carbo)

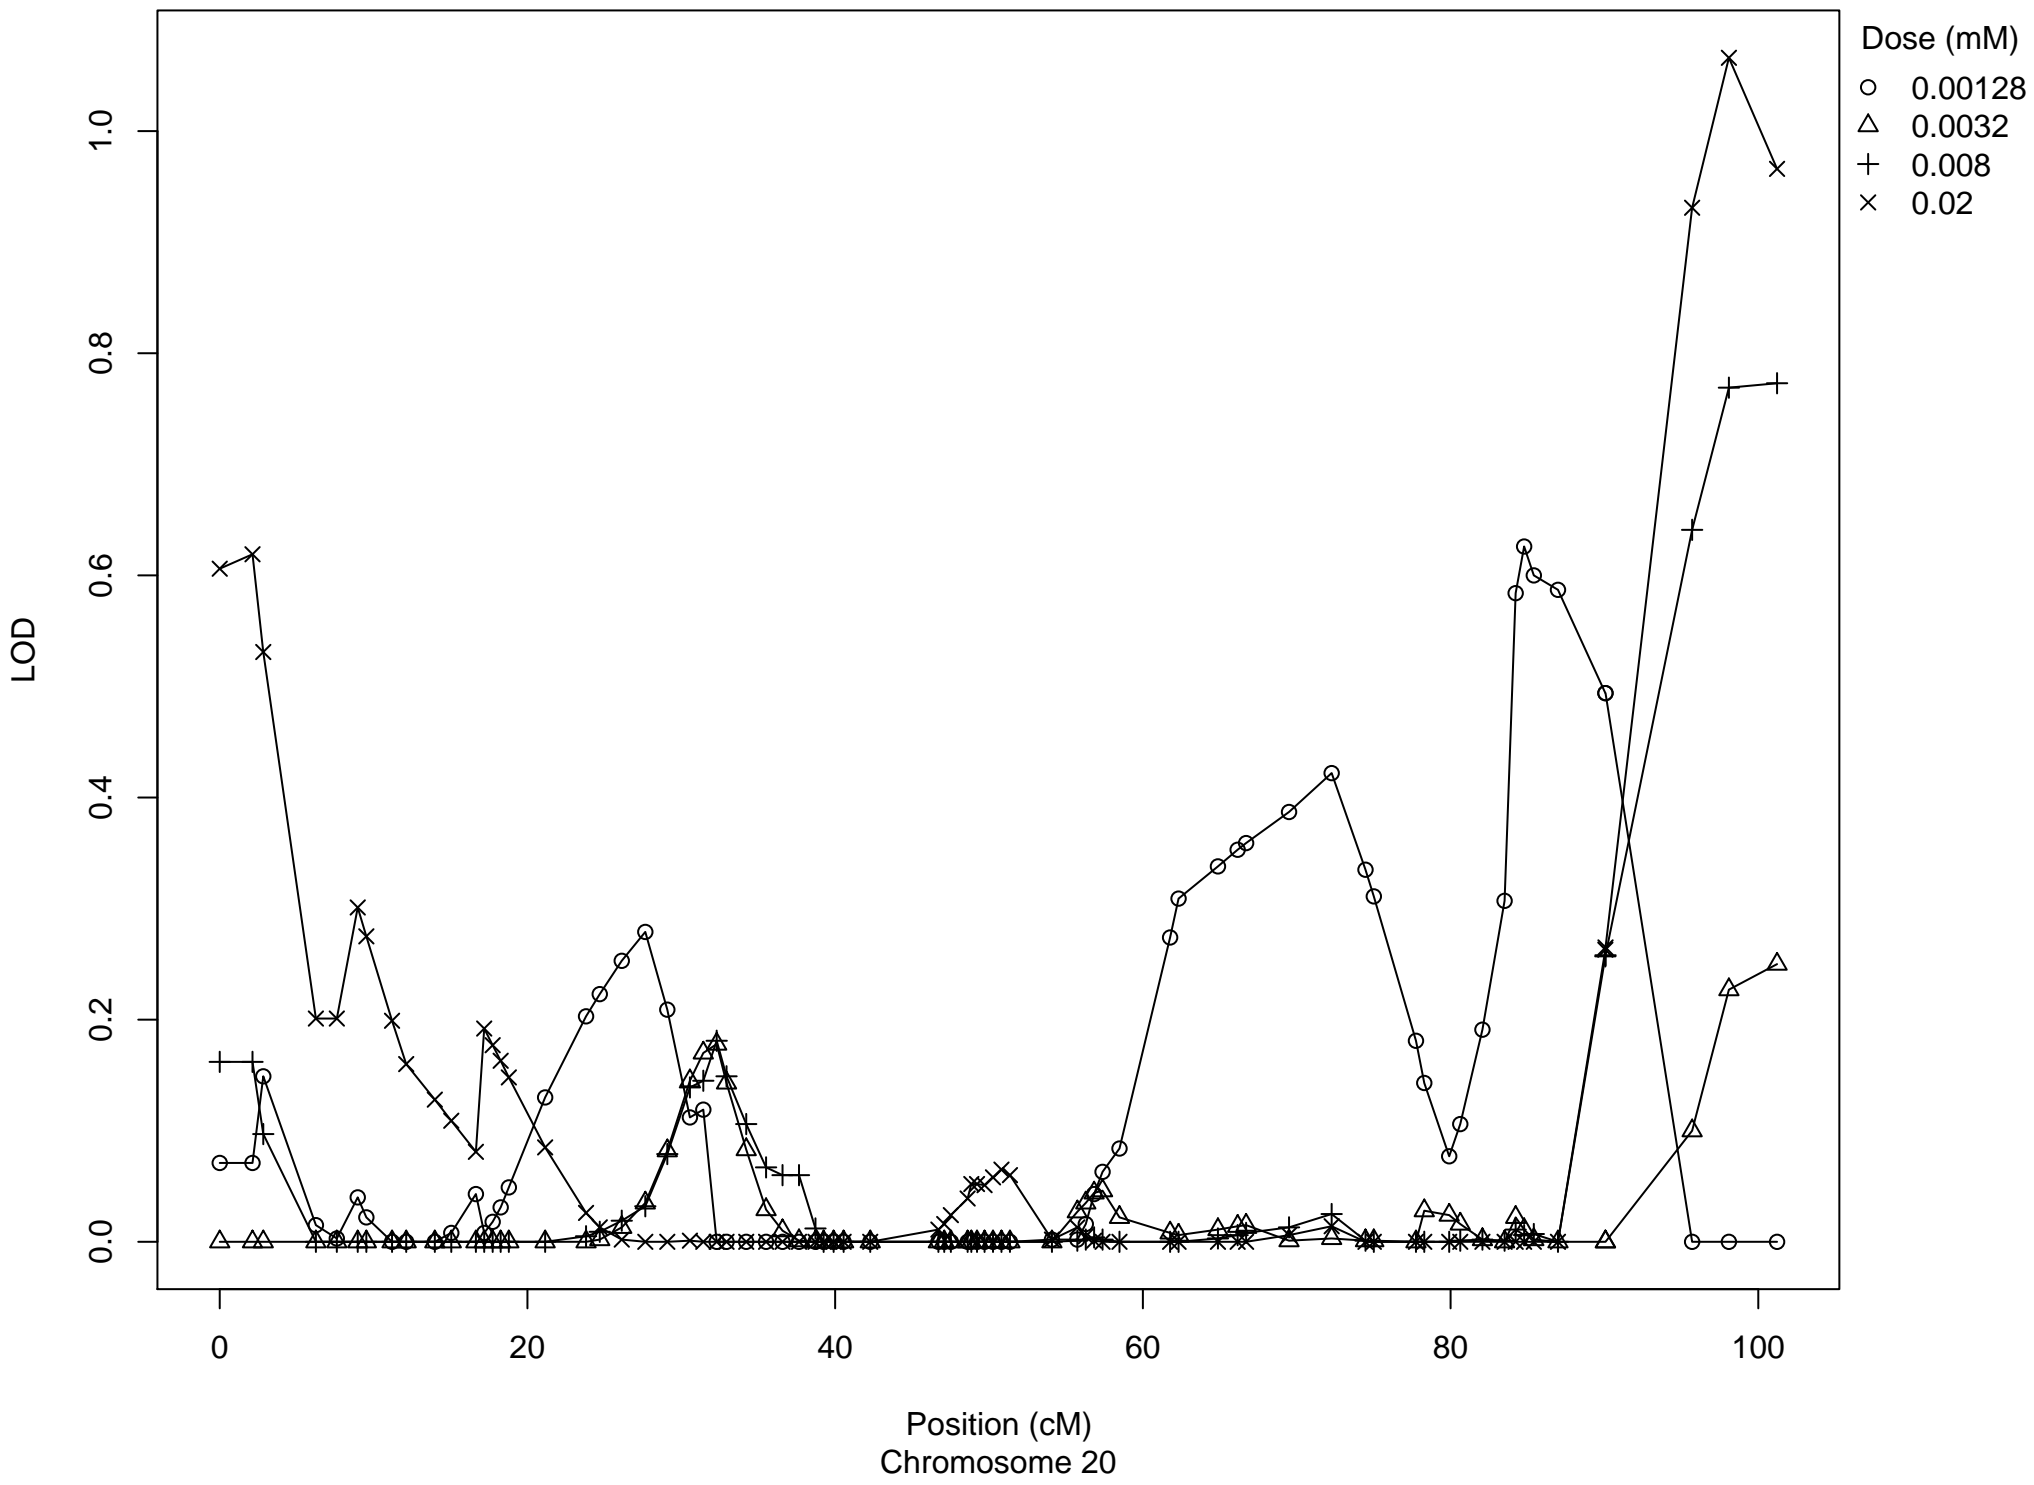

# Carboplatin (Carbo)

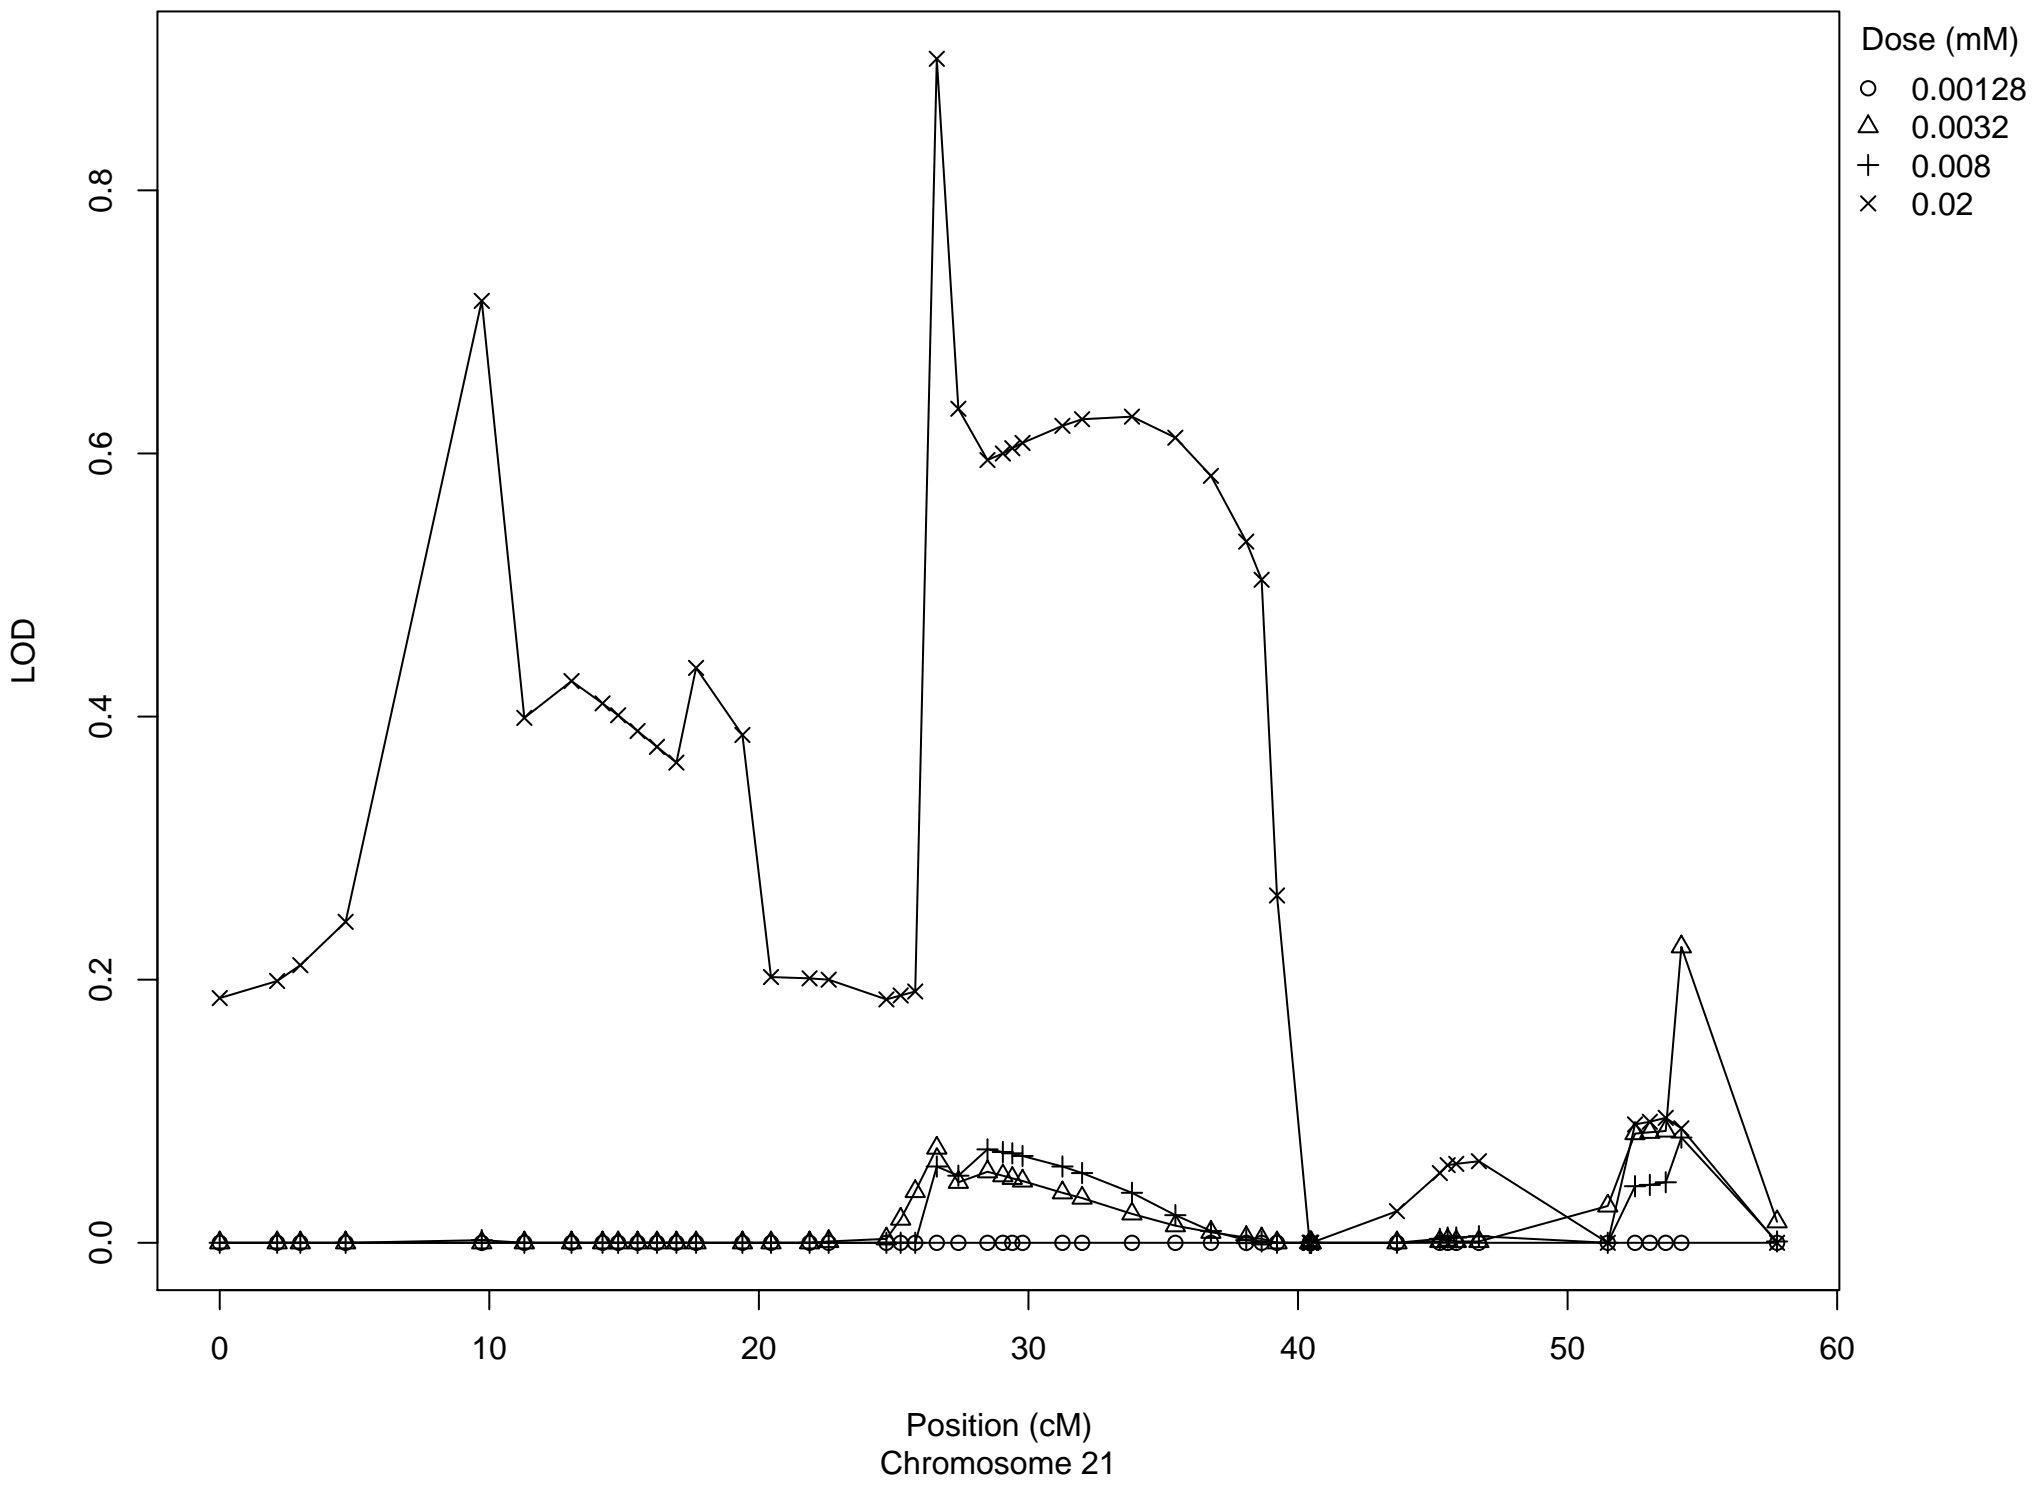

# Carboplatin (Carbo)

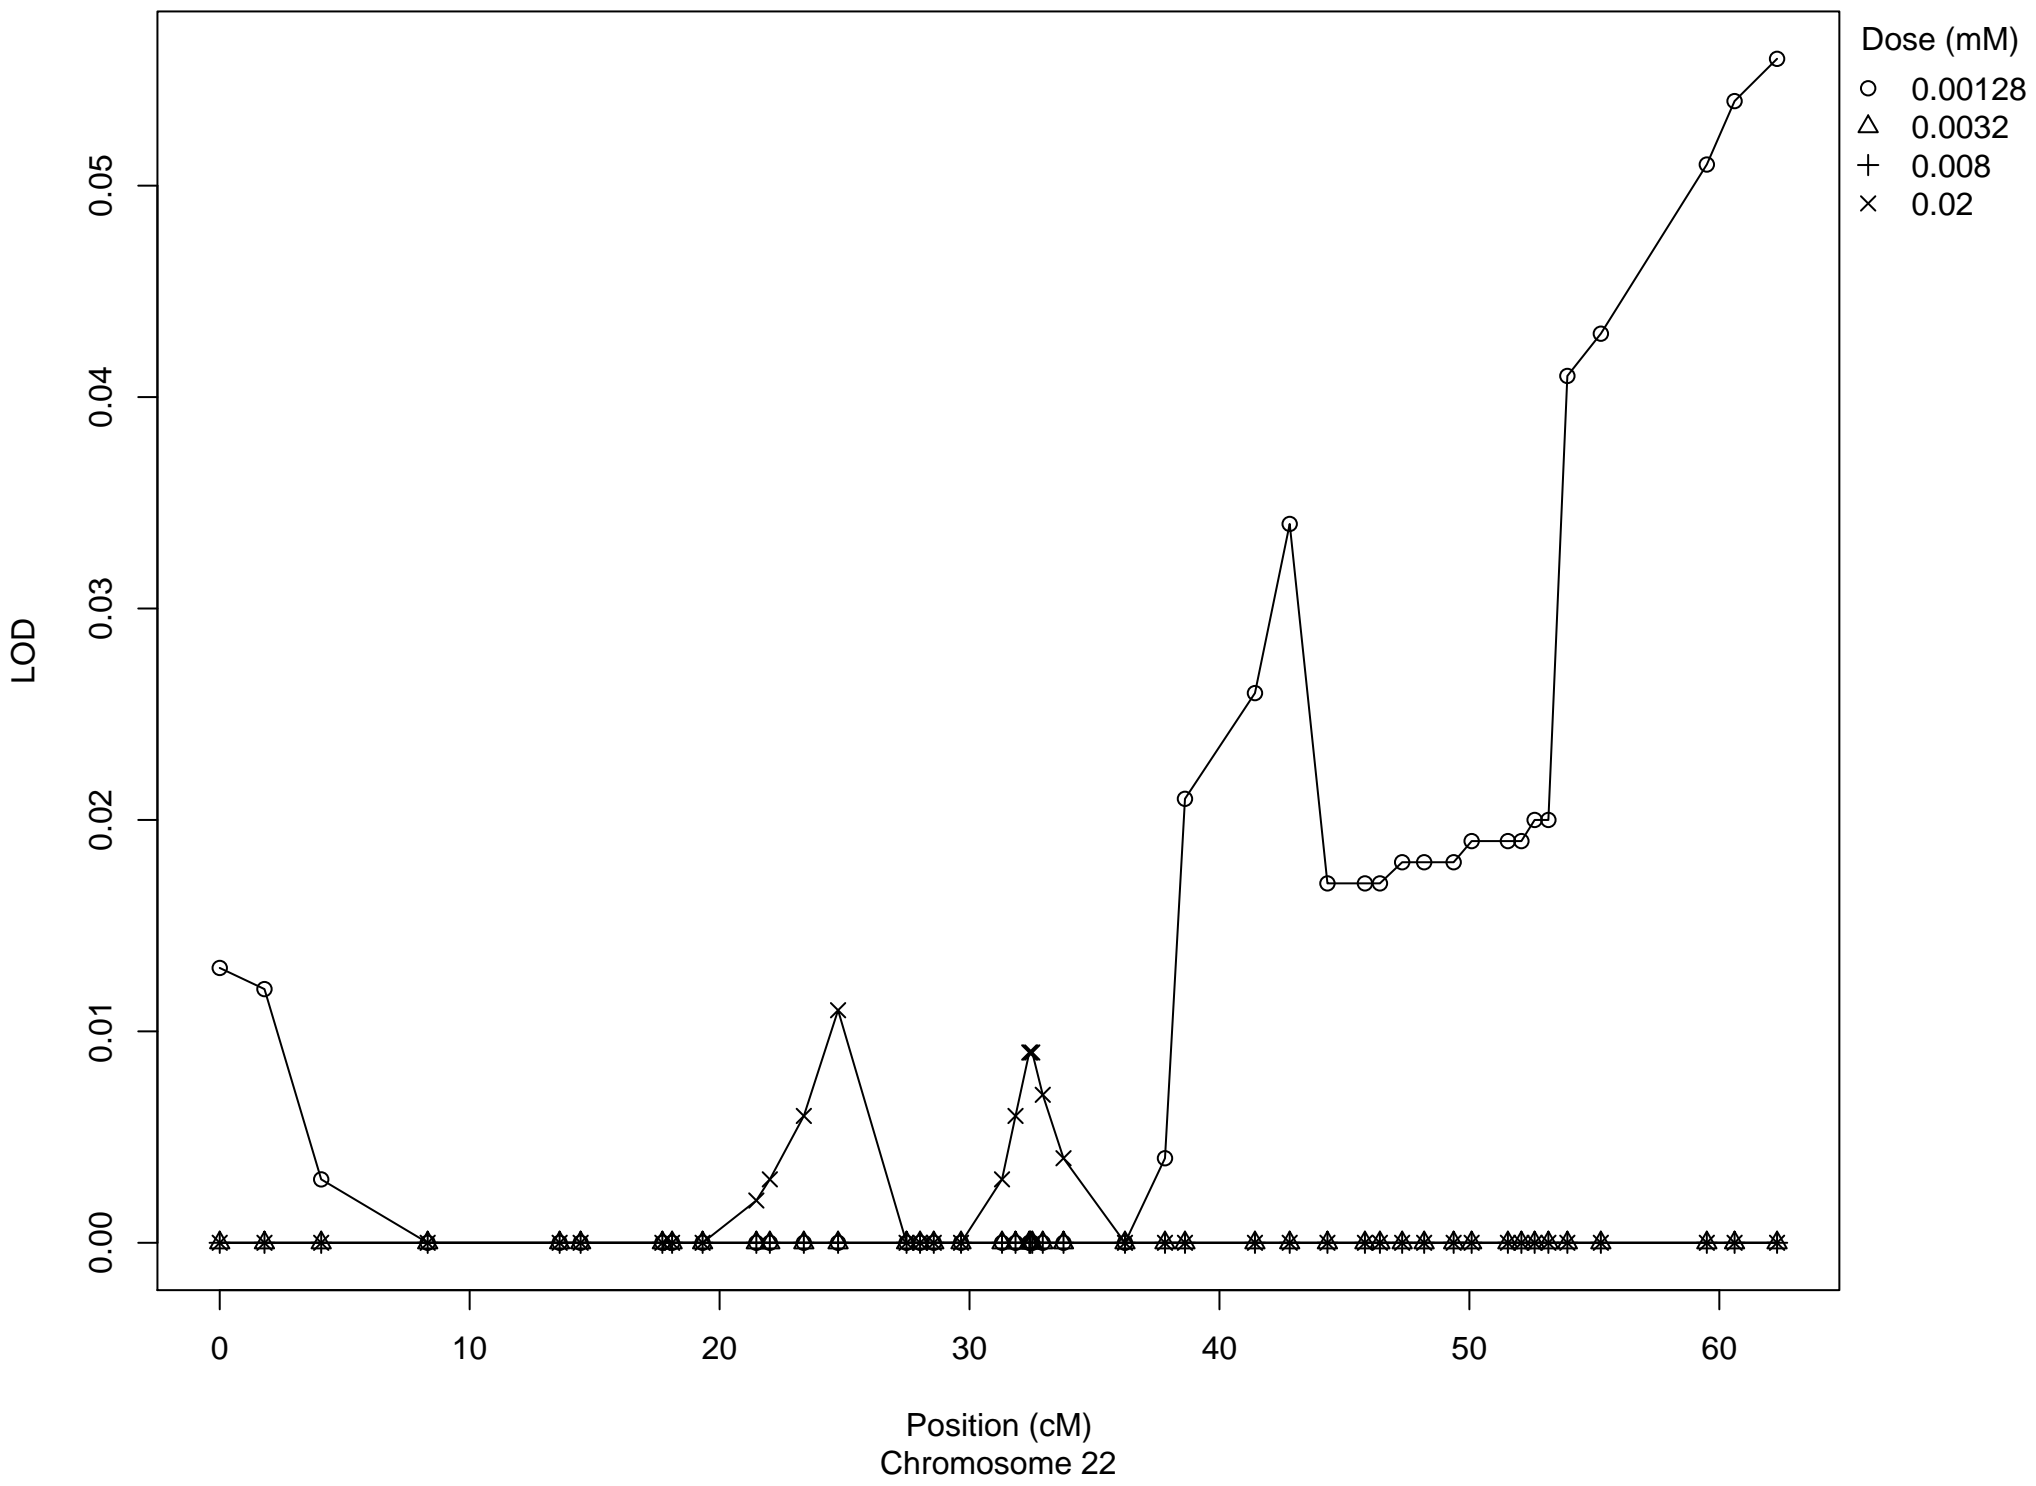

# Cytosine beta-D-arabinofuranoside (Cytar)

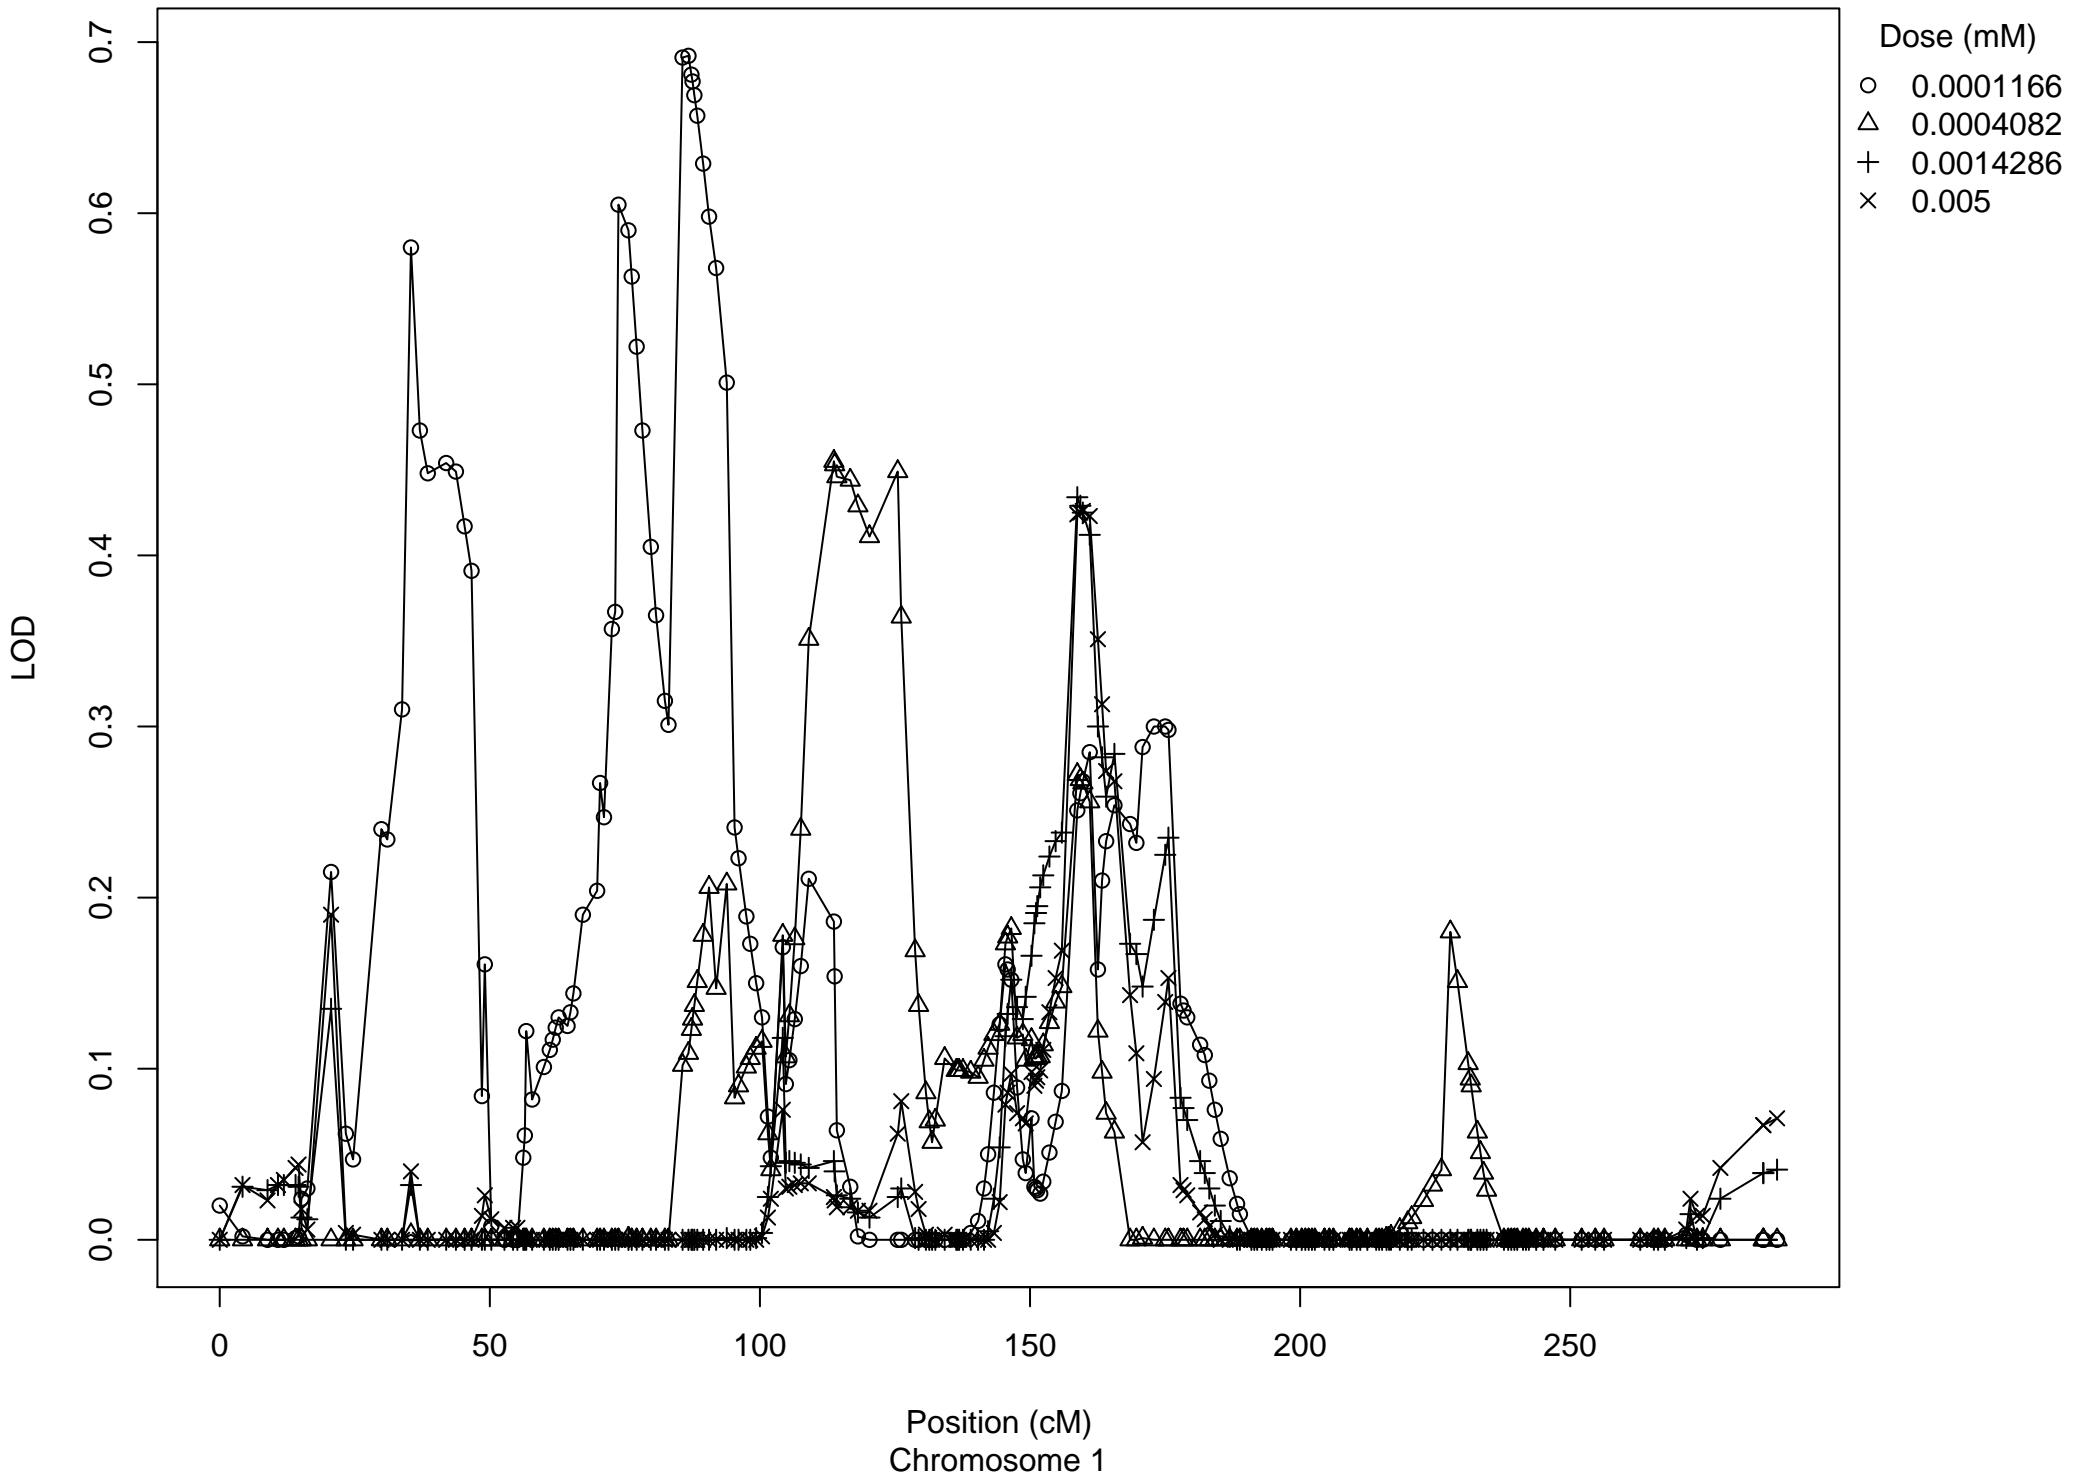

# Cytosine beta-D-arabinofuranoside (Cytar)

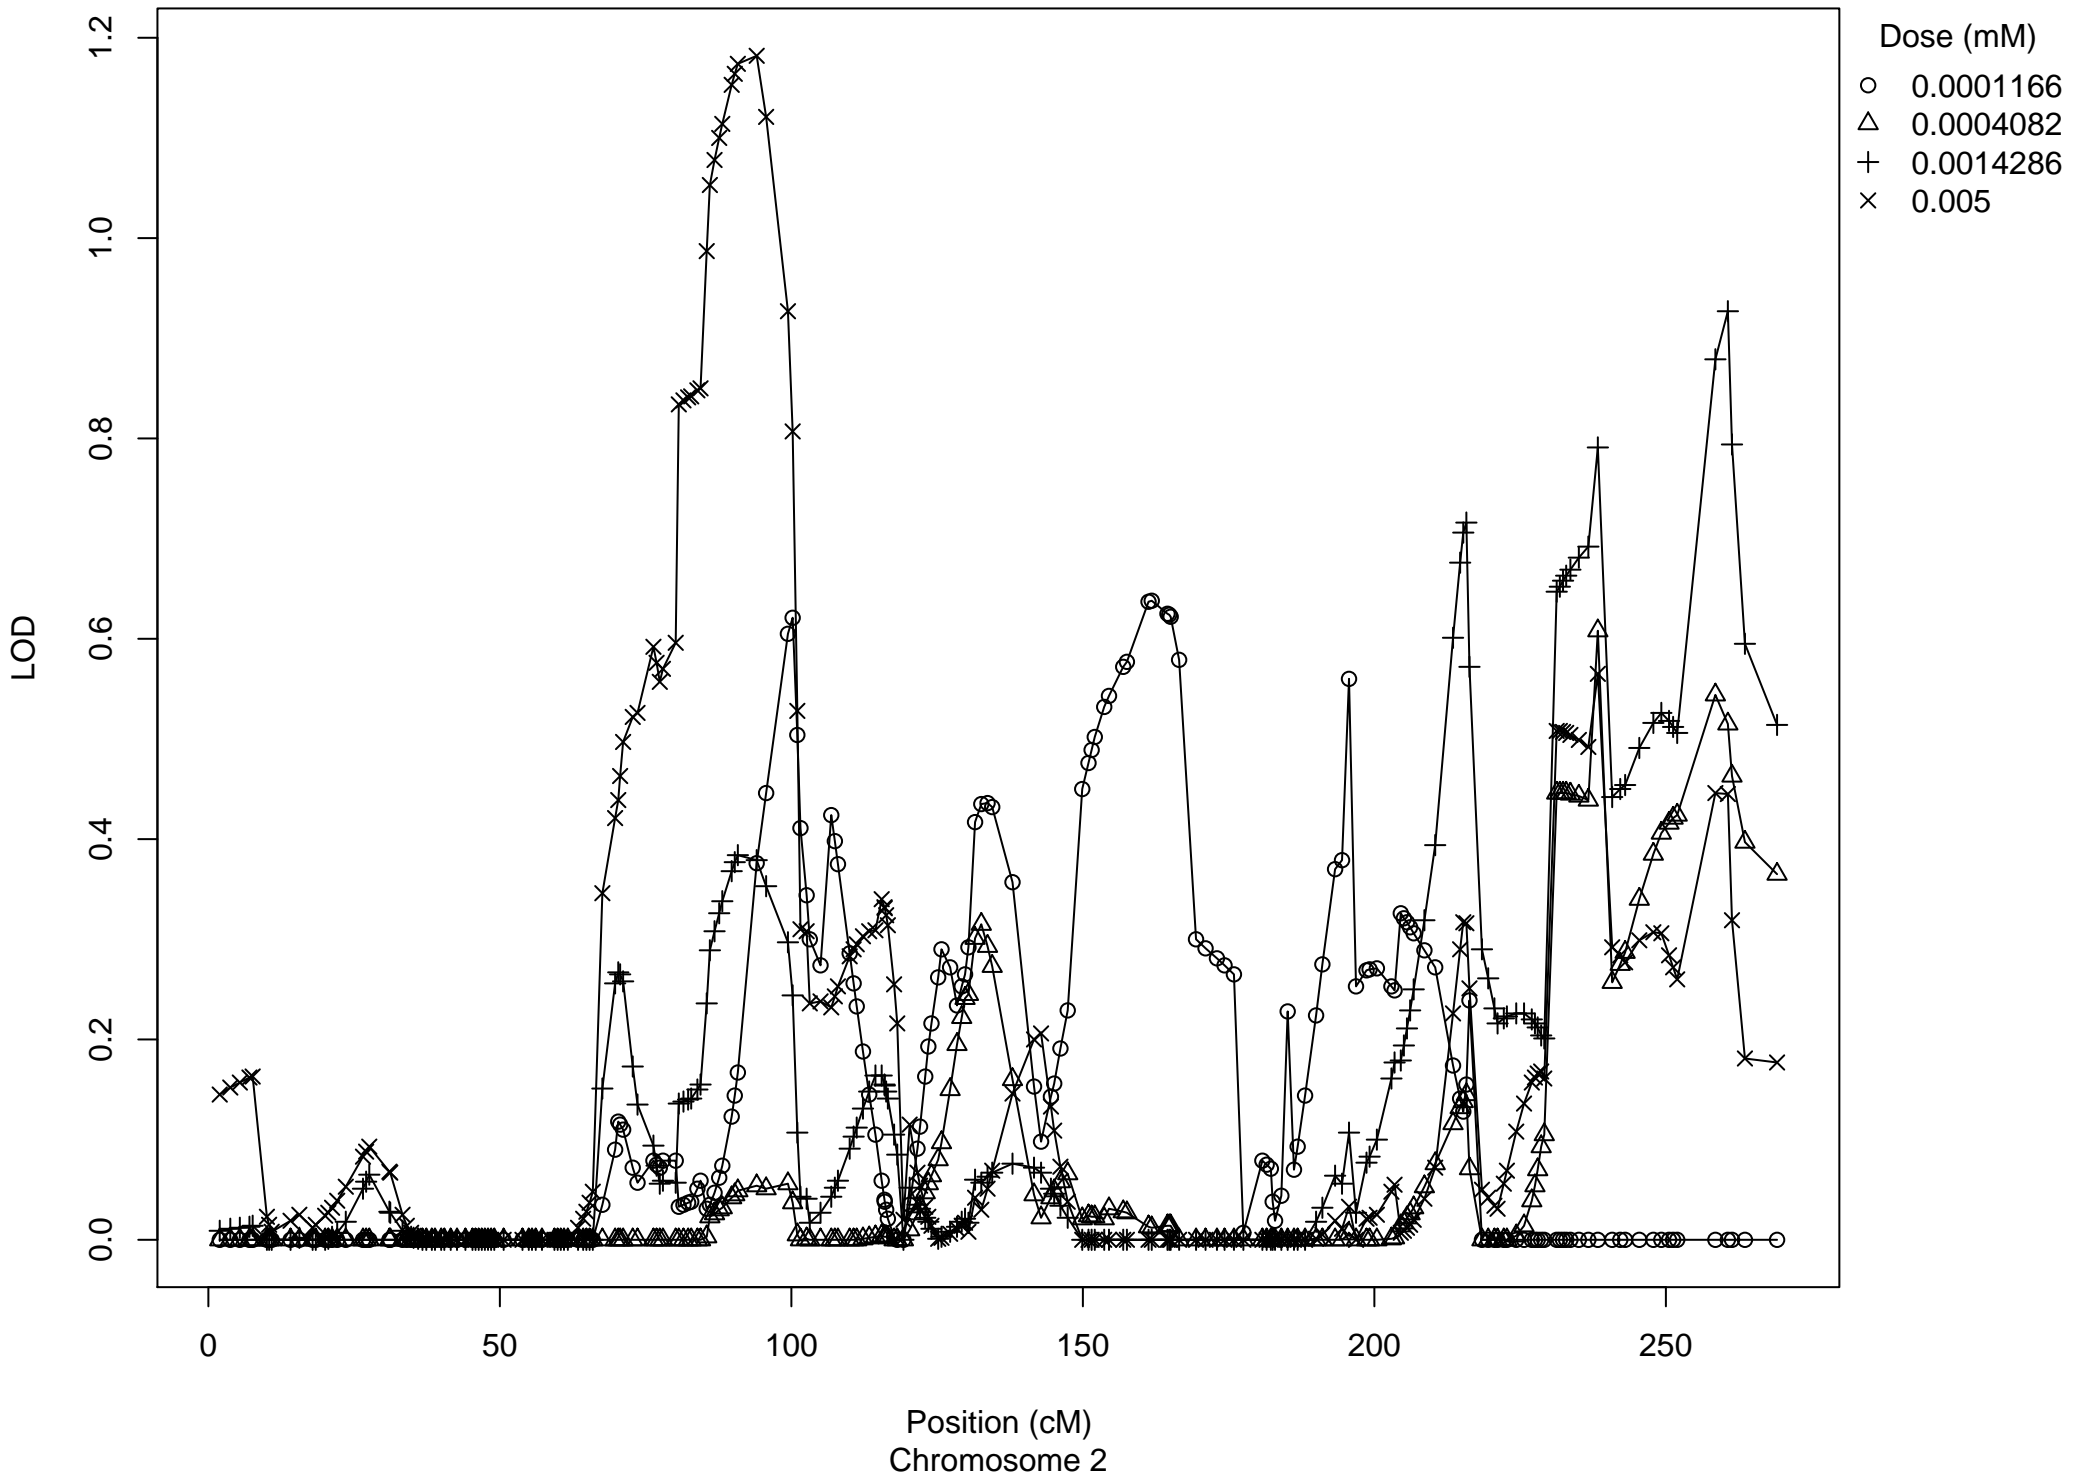



# Cytosine beta-D-arabinofuranoside (Cytar)

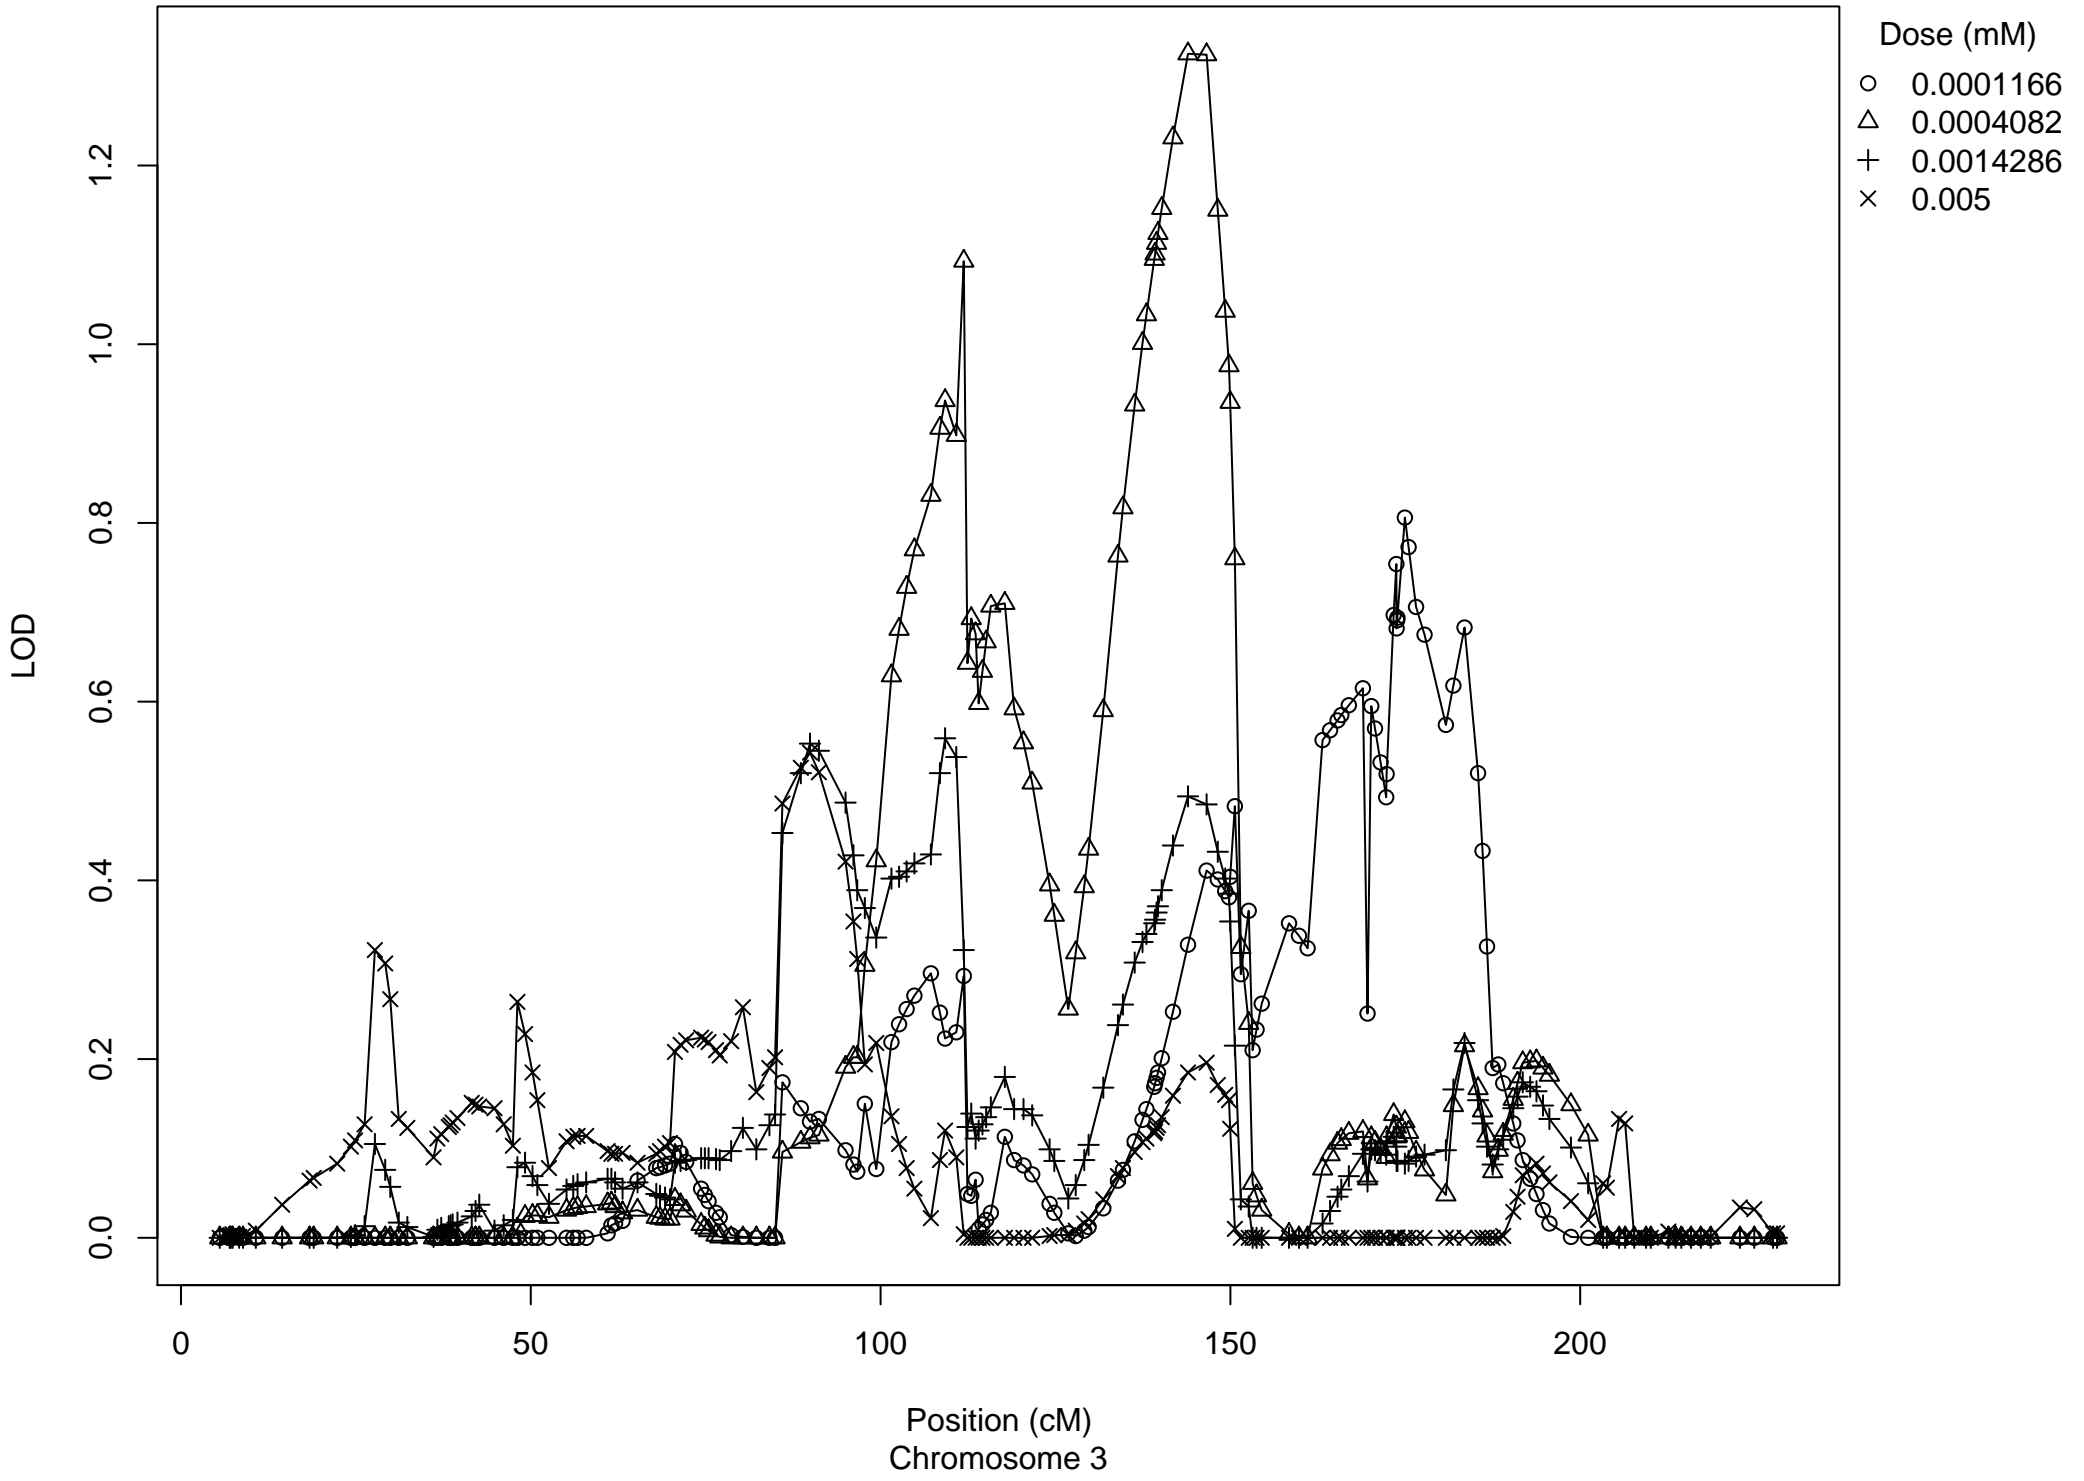

# Cytosine beta-D-arabinofuranoside (Cytar)

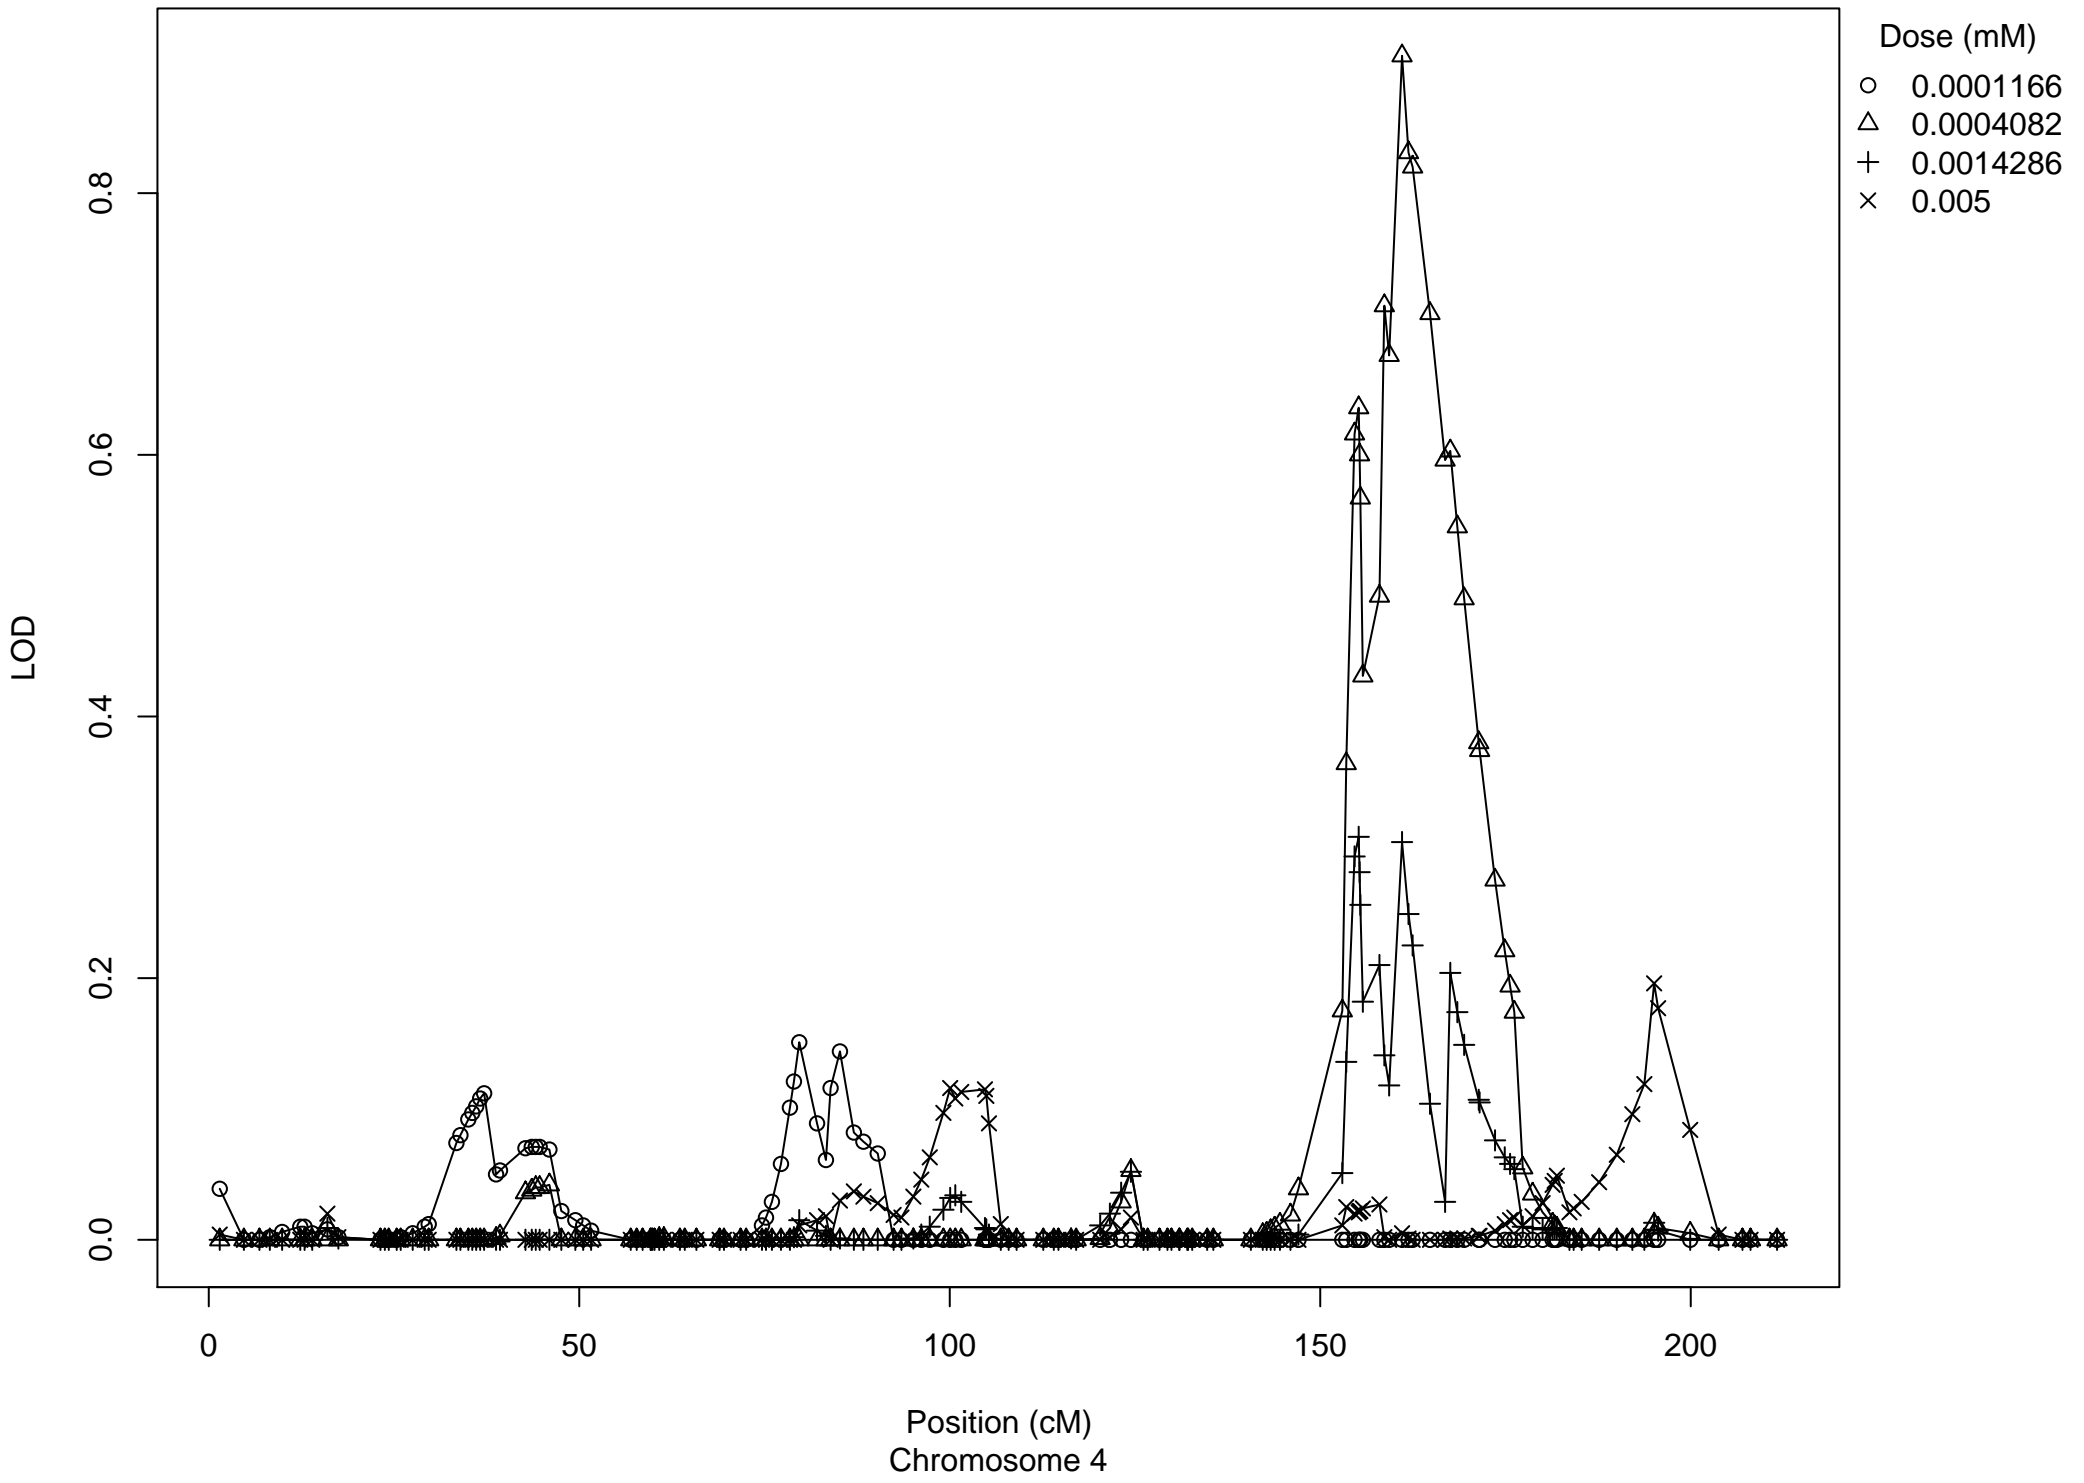

# Cytosine beta-D-arabinofuranoside (Cytar)

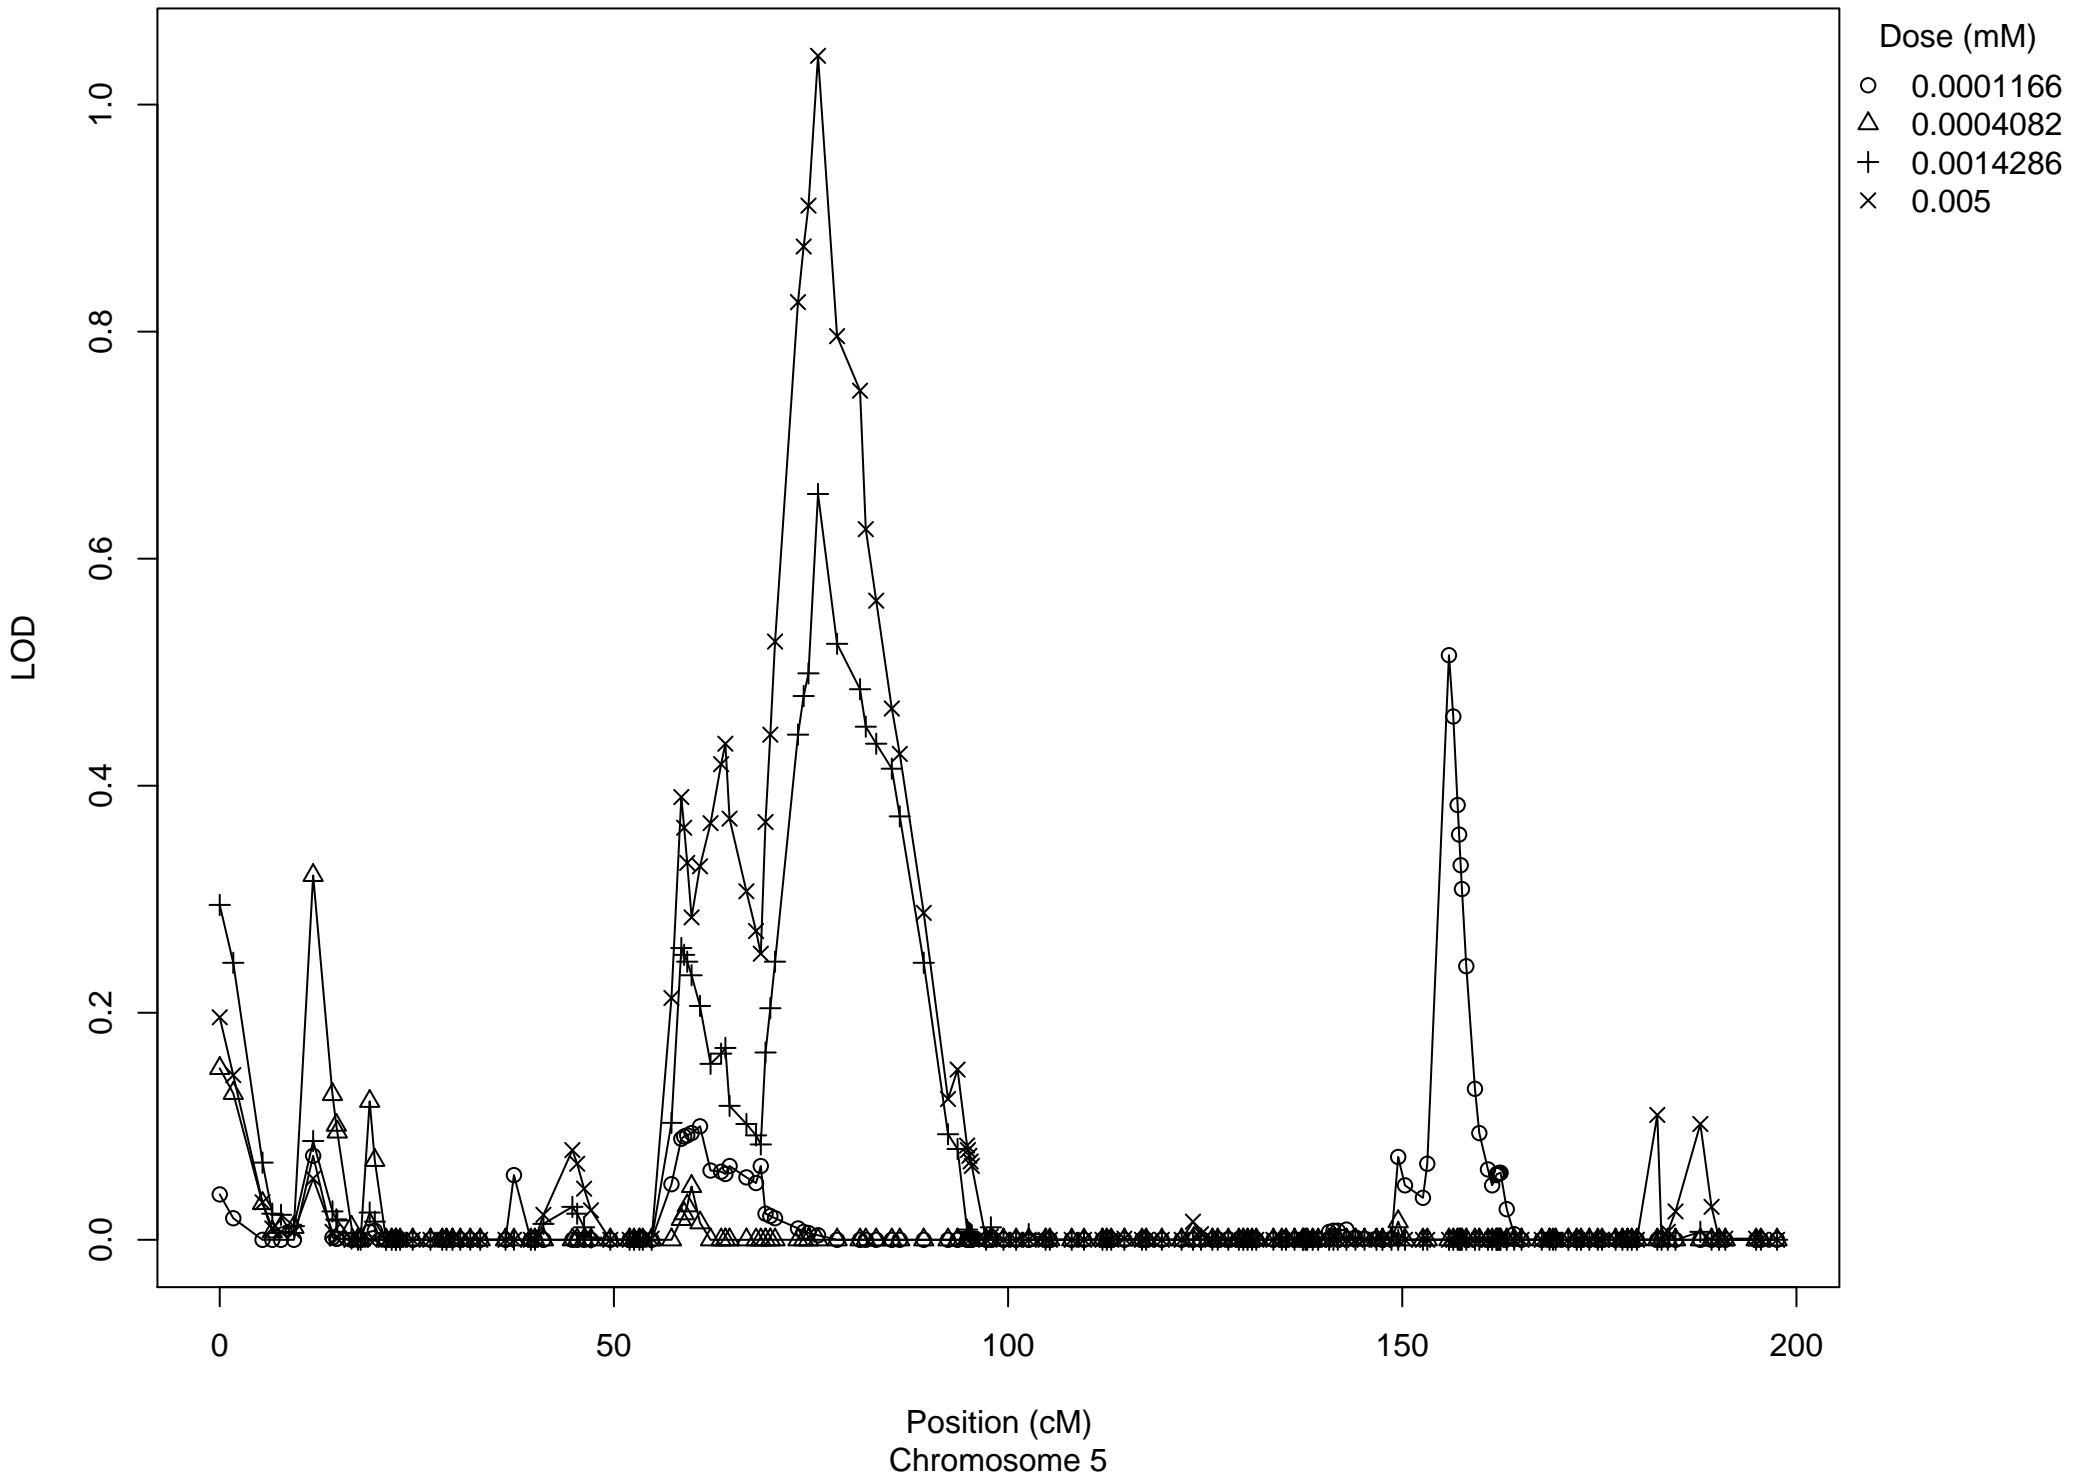

# Cytosine beta-D-arabinofuranoside (Cytar)

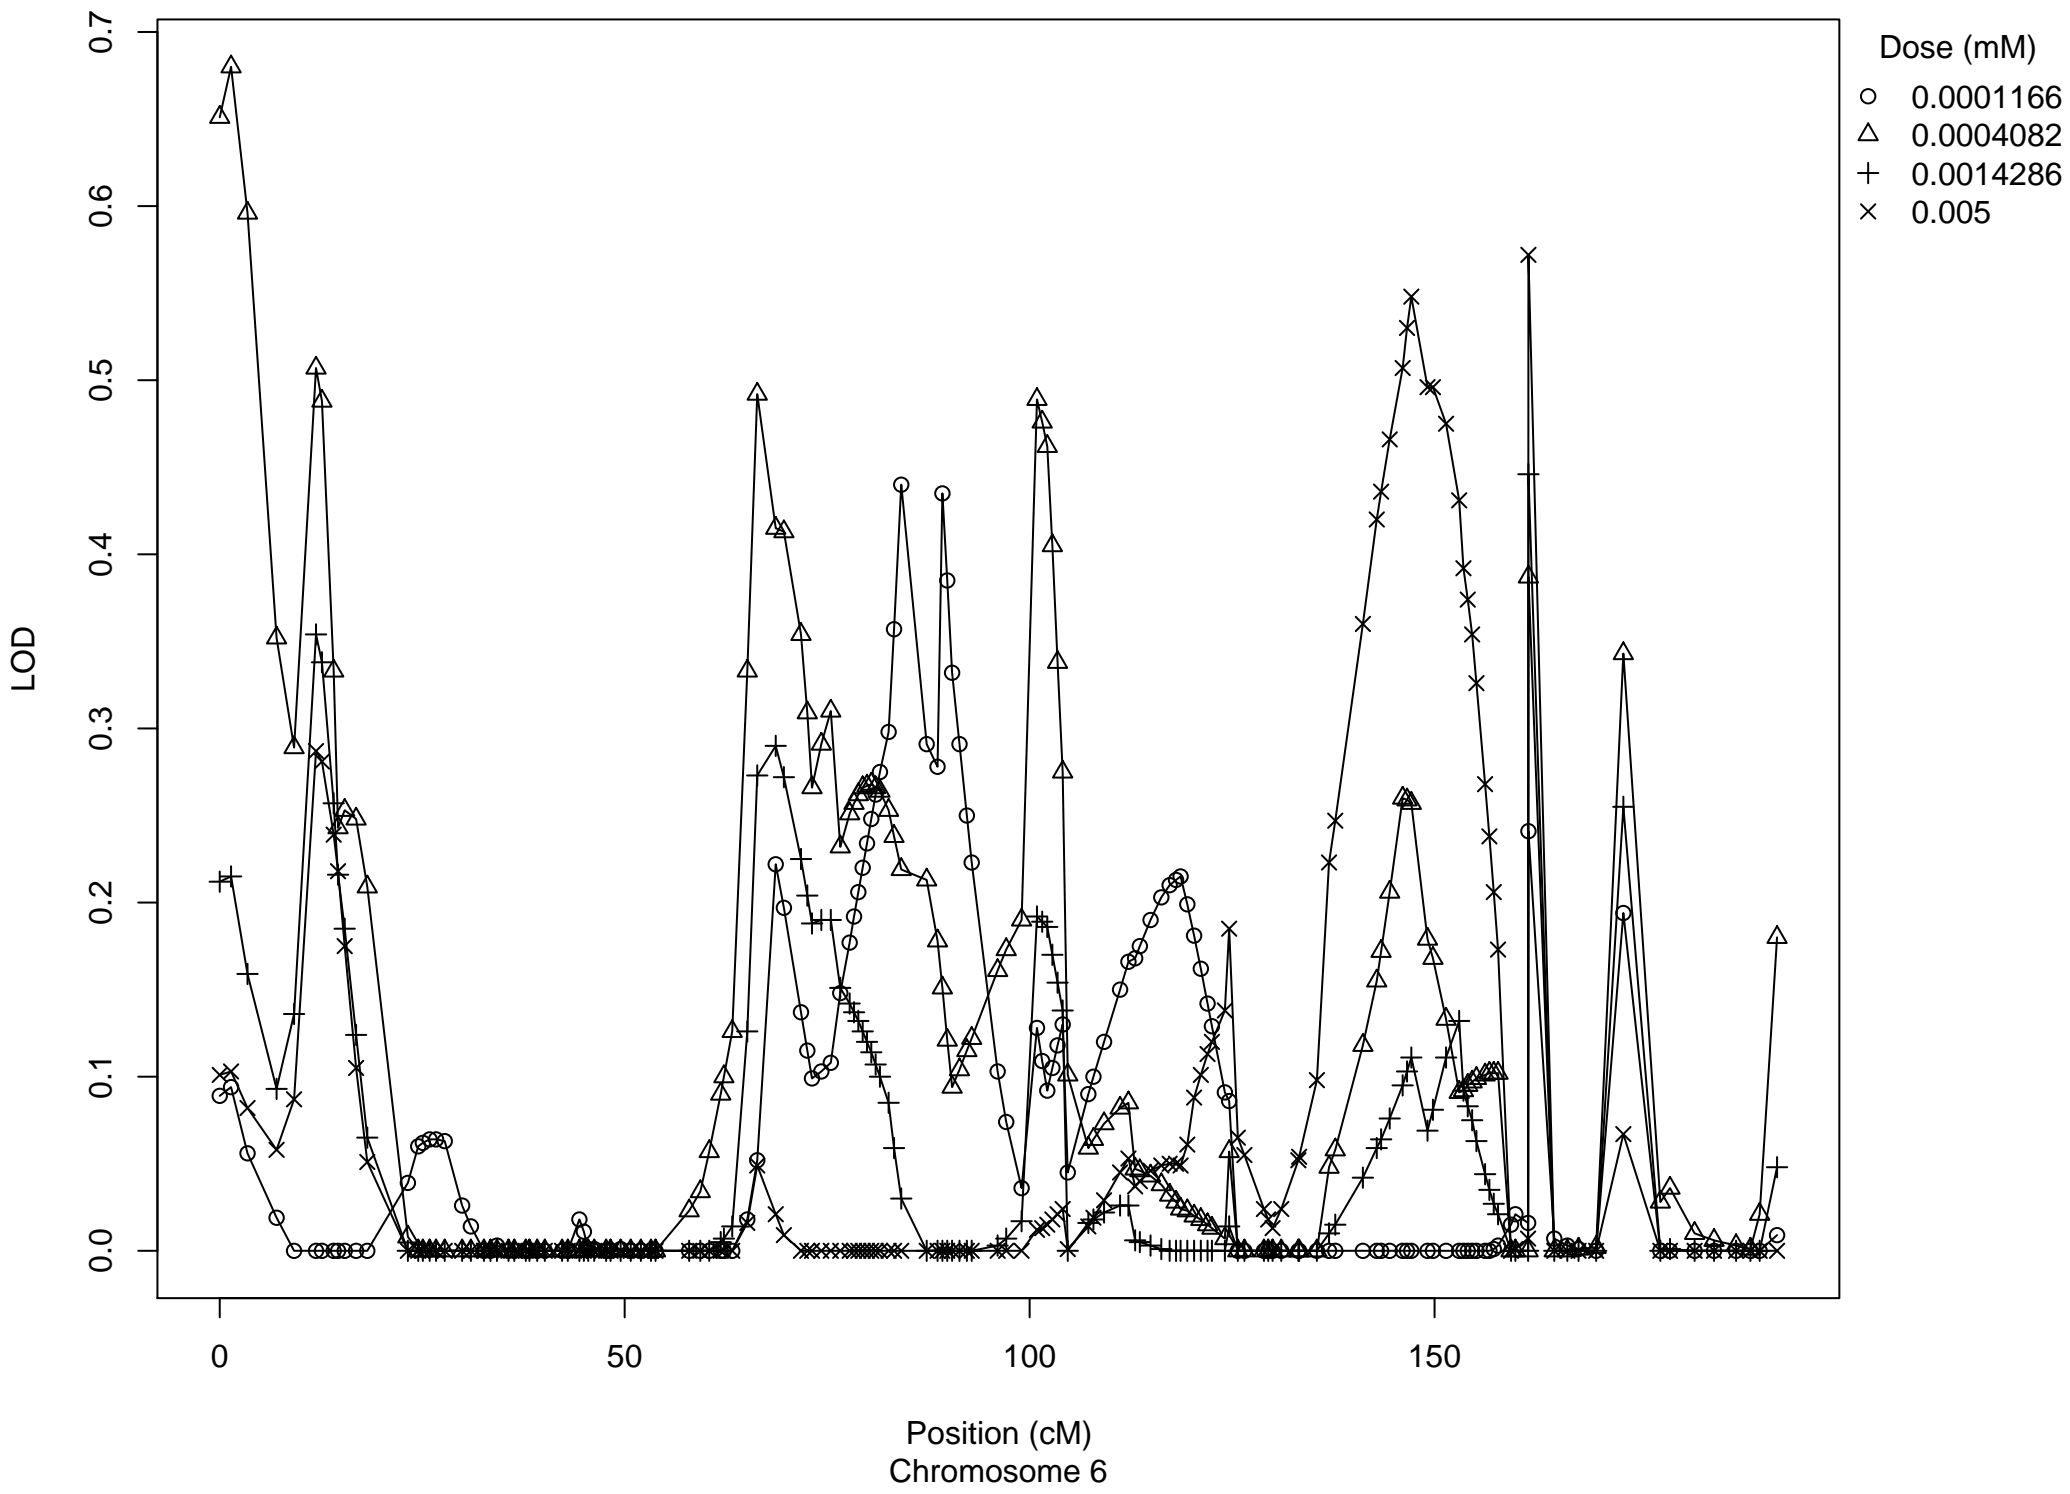

# Cytosine beta-D-arabinofuranoside (Cytar)

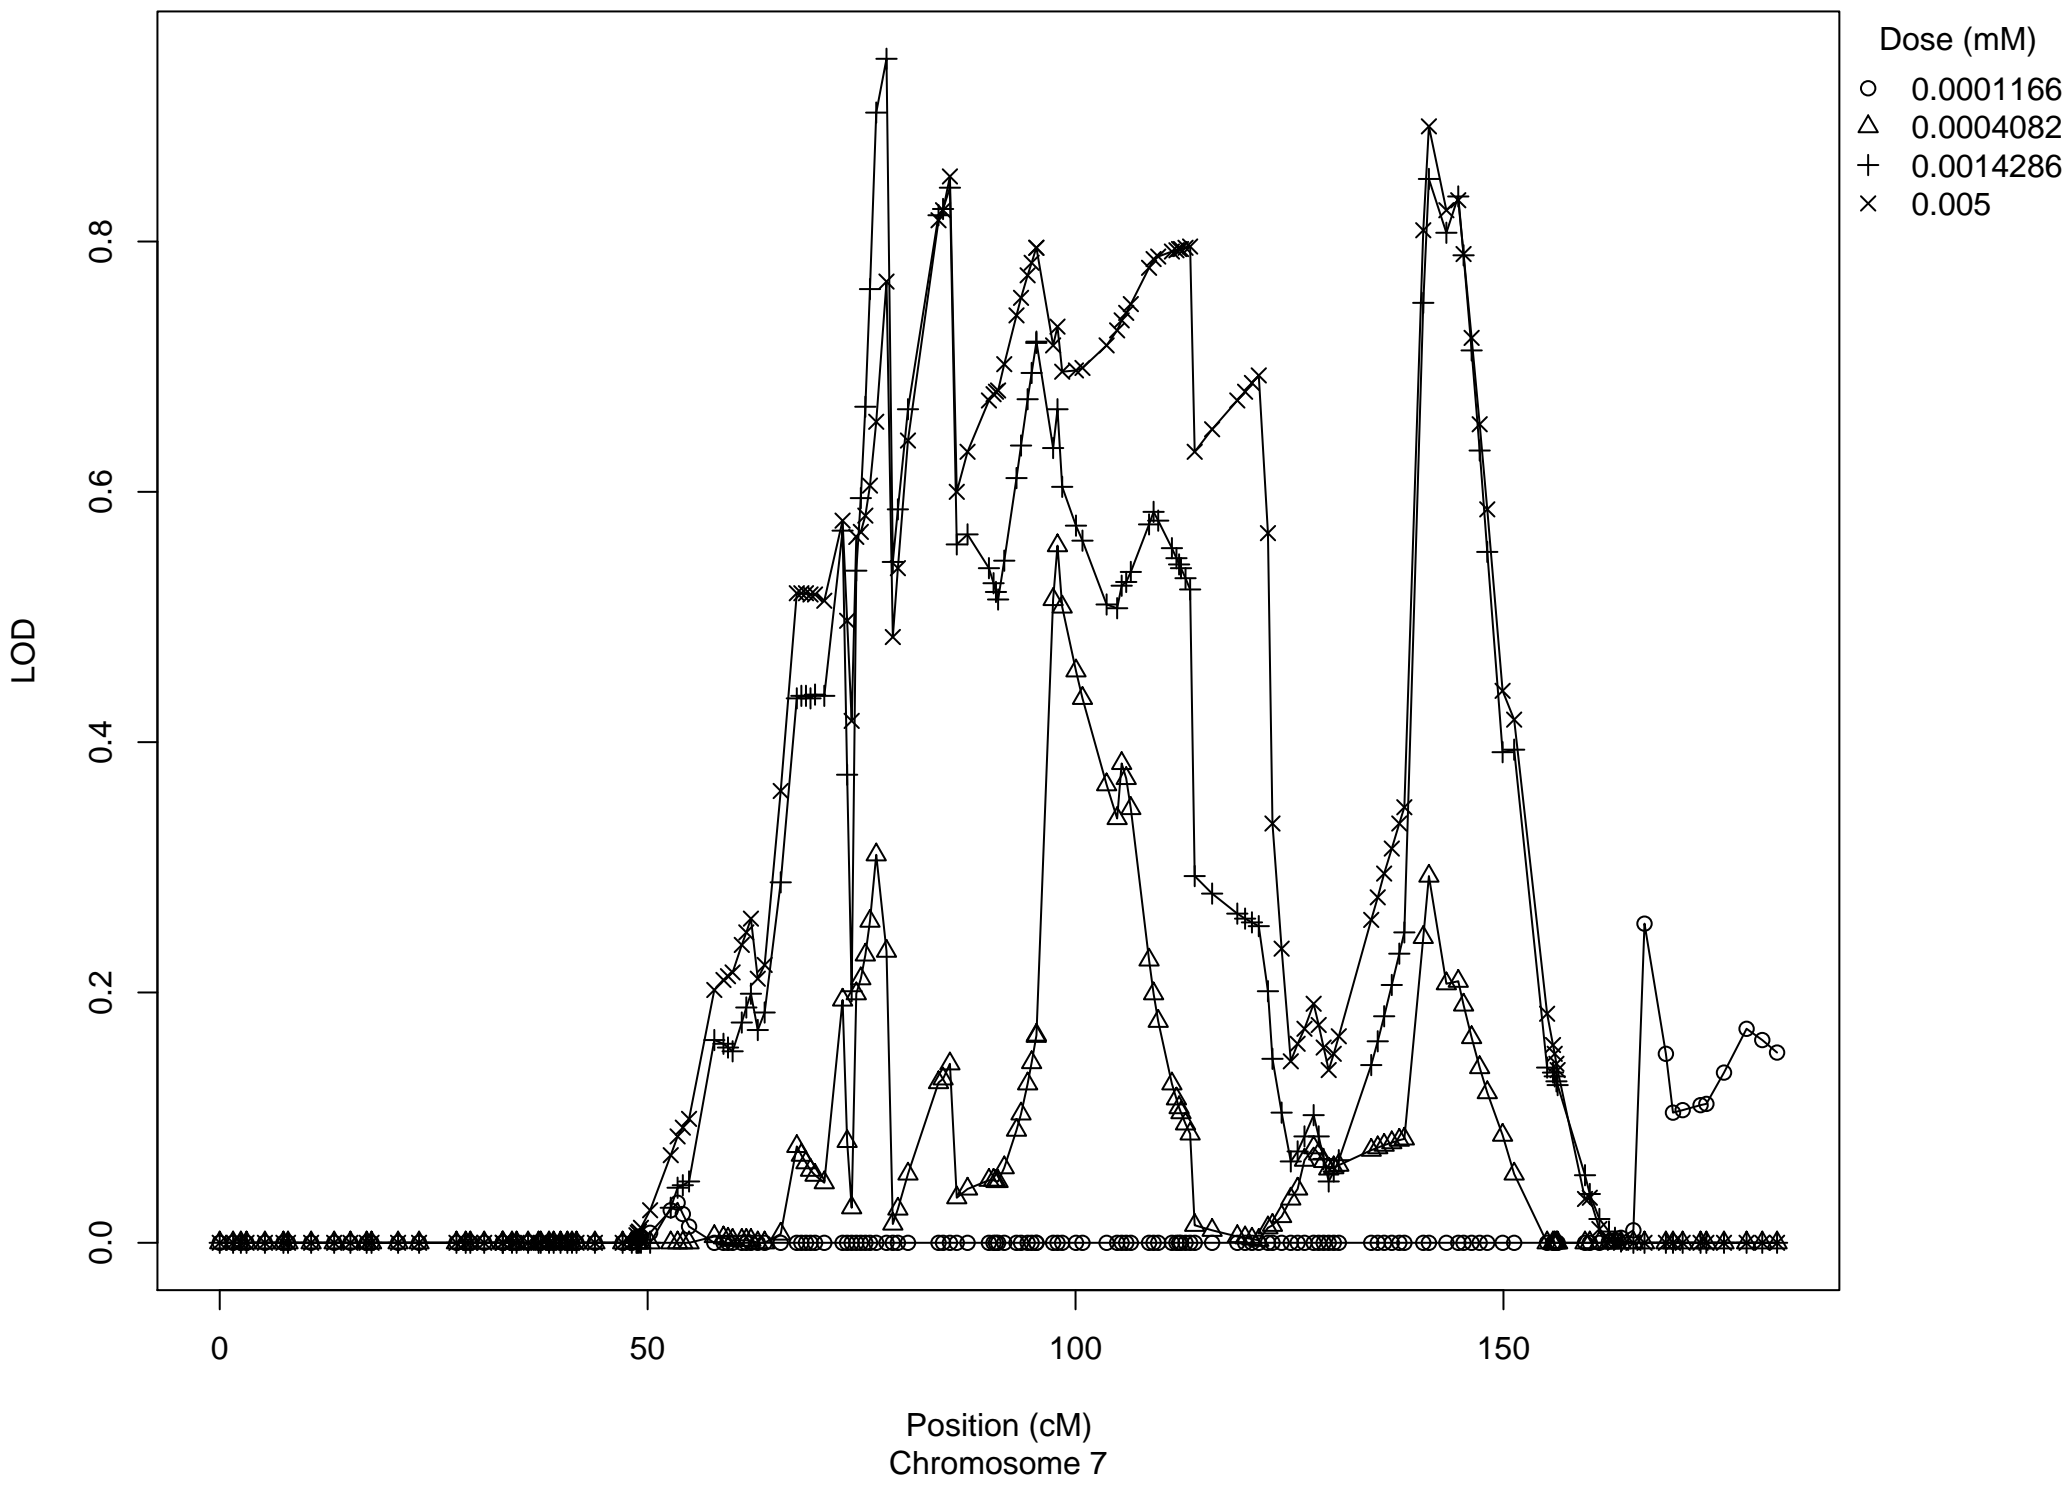

# Cytosine beta-D-arabinofuranoside (Cytar)

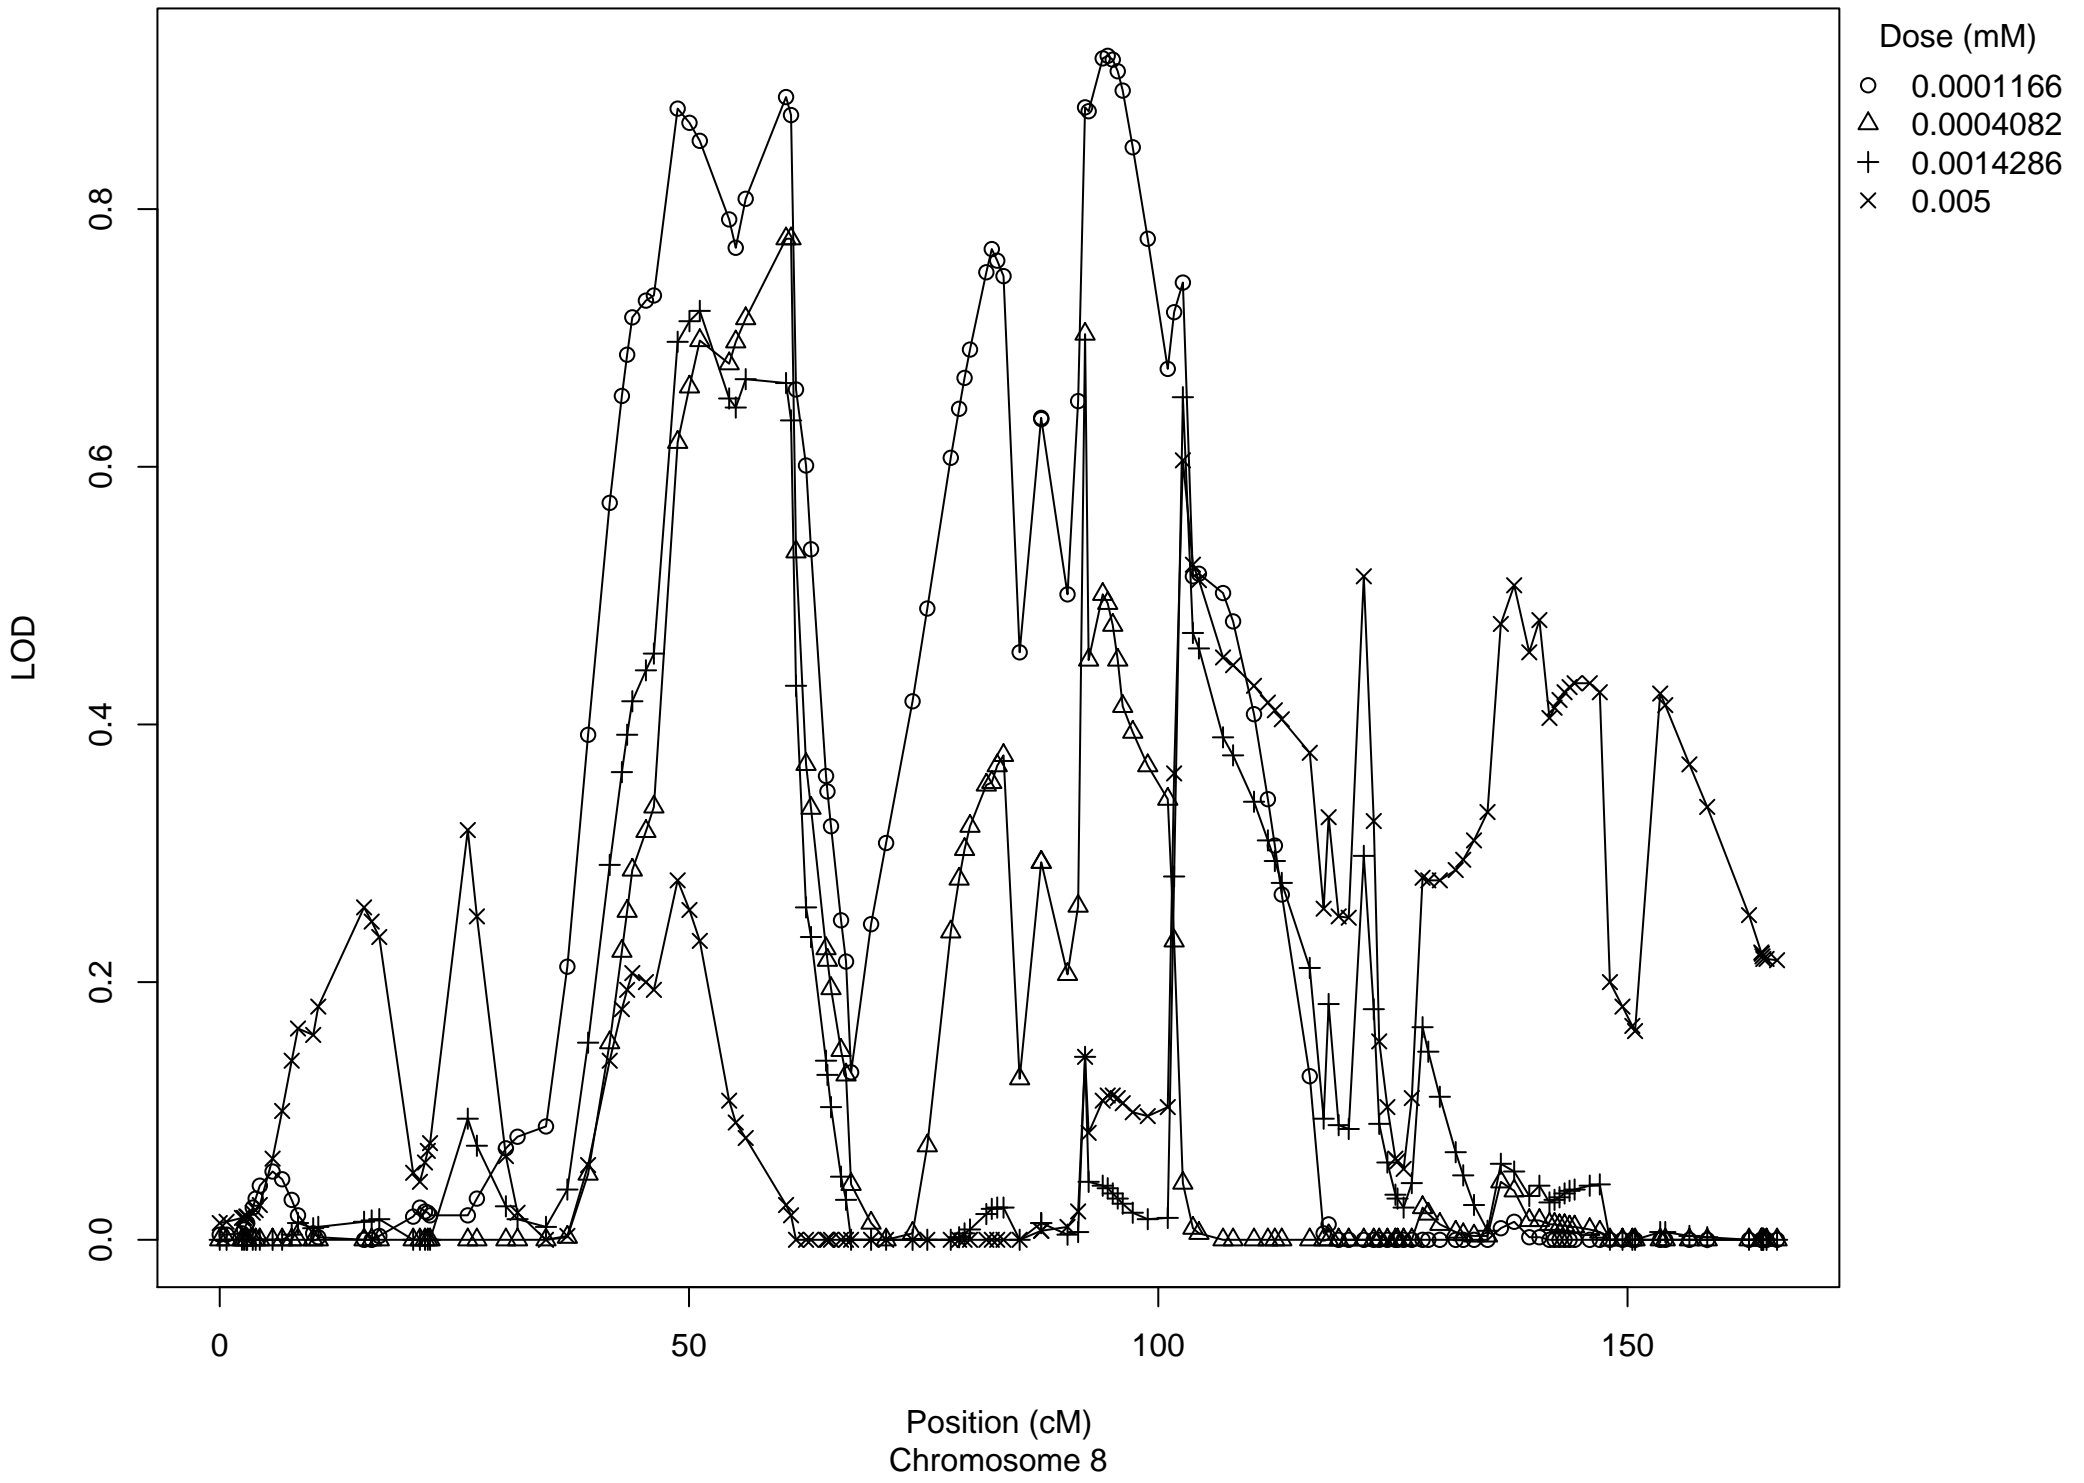

# Cytosine beta-D-arabinofuranoside (Cytar)

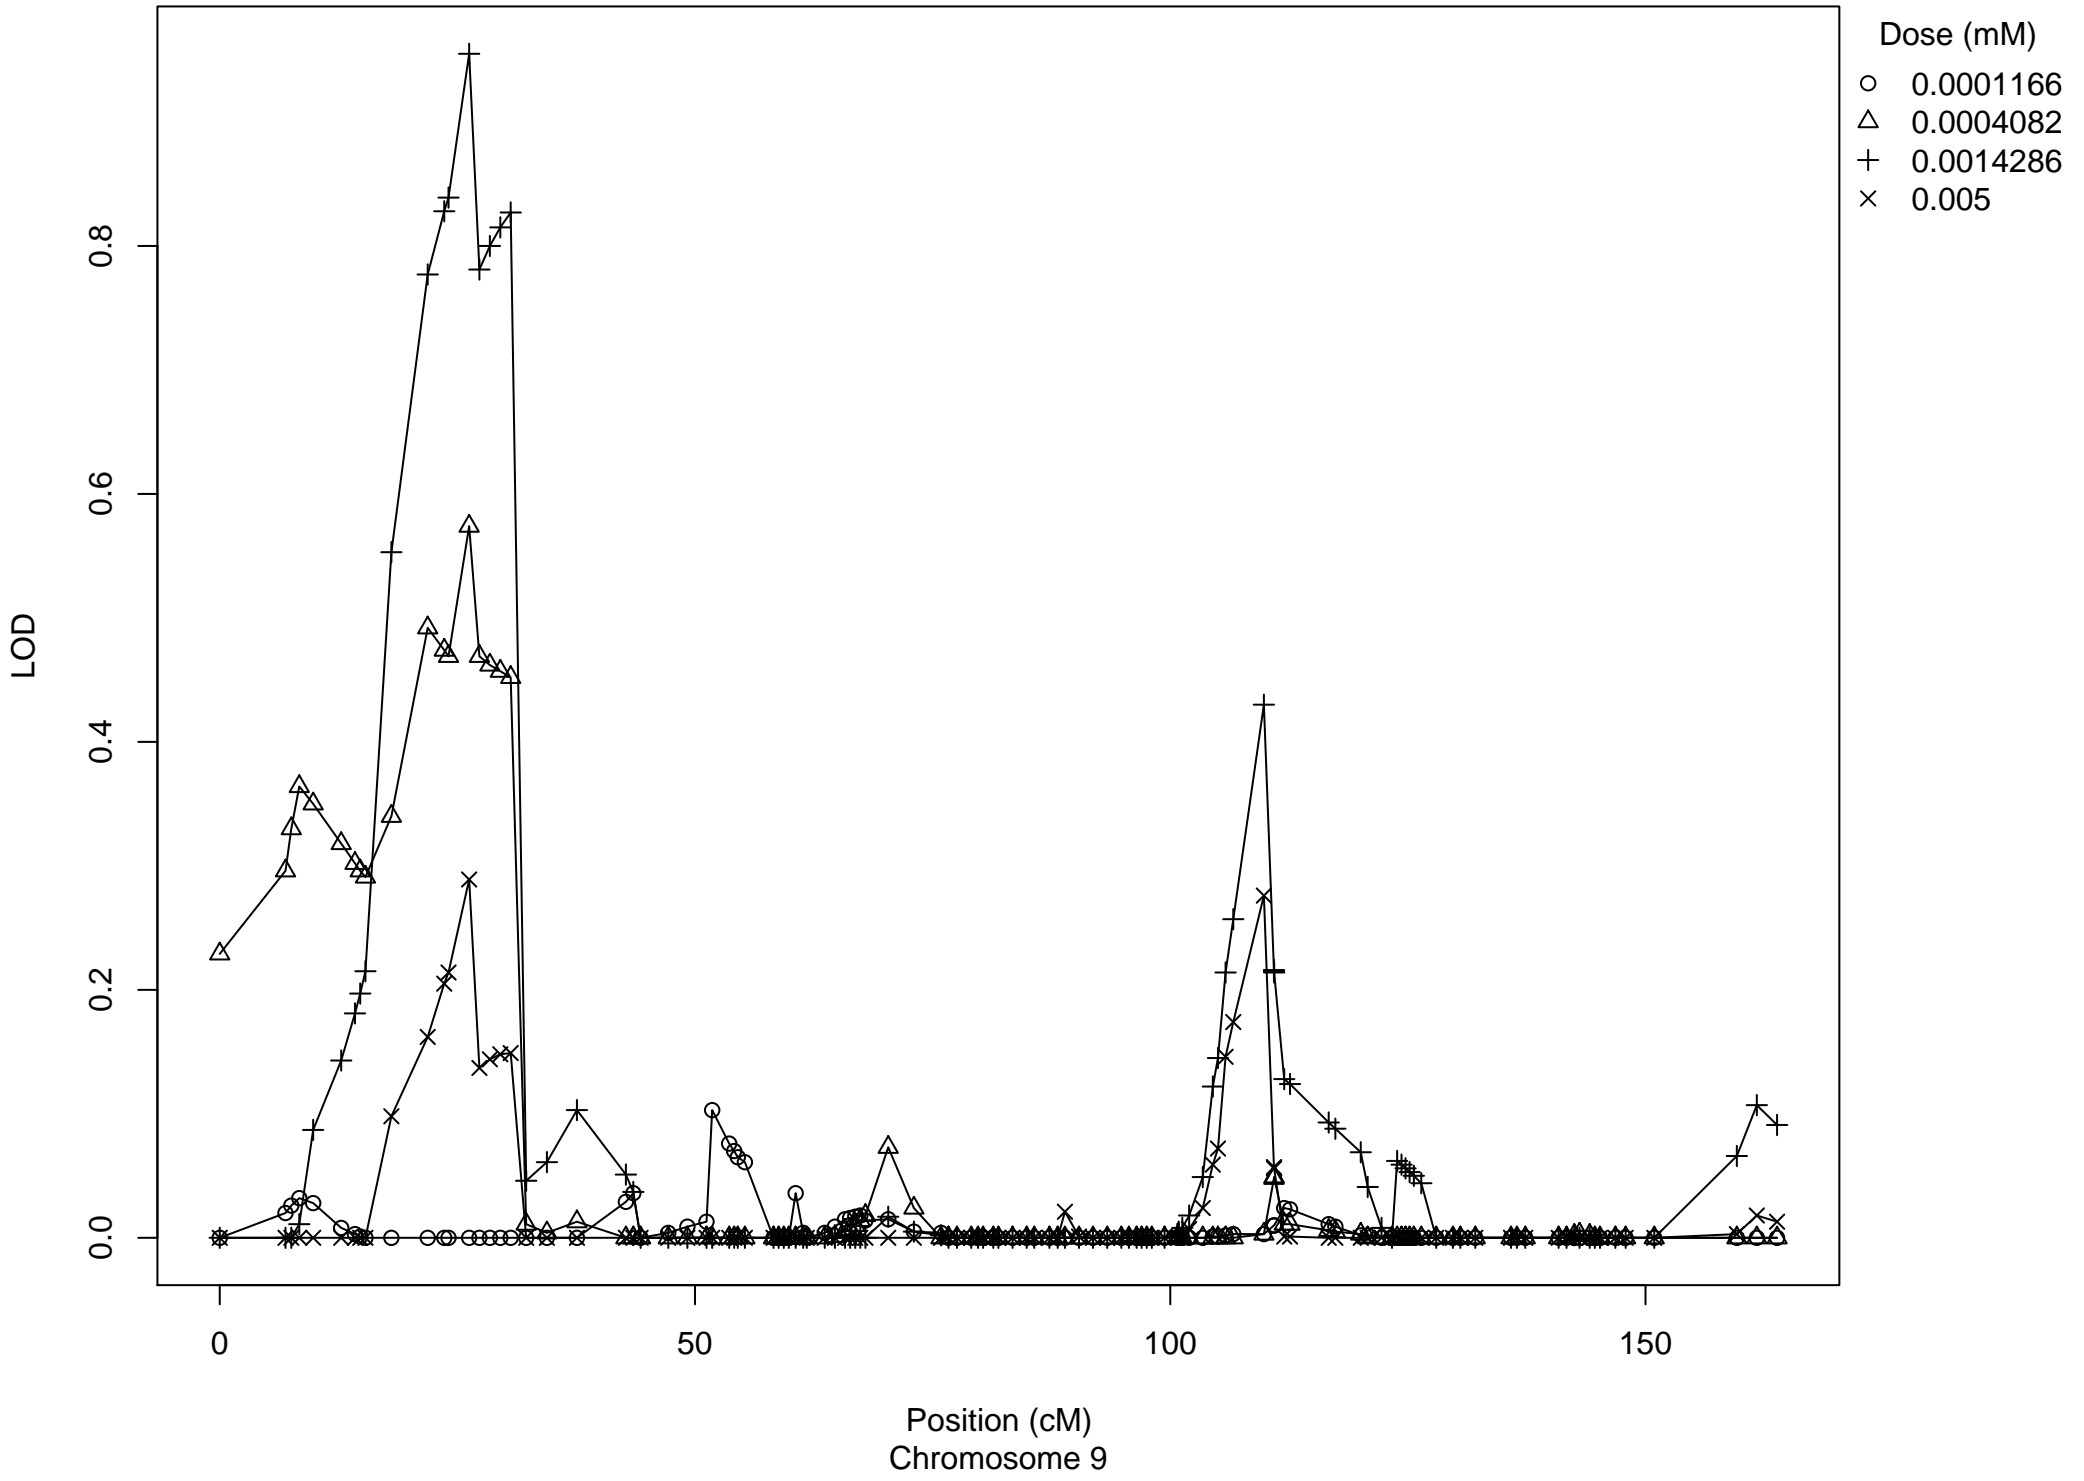

# Cytosine beta-D-arabinofuranoside (Cytar)

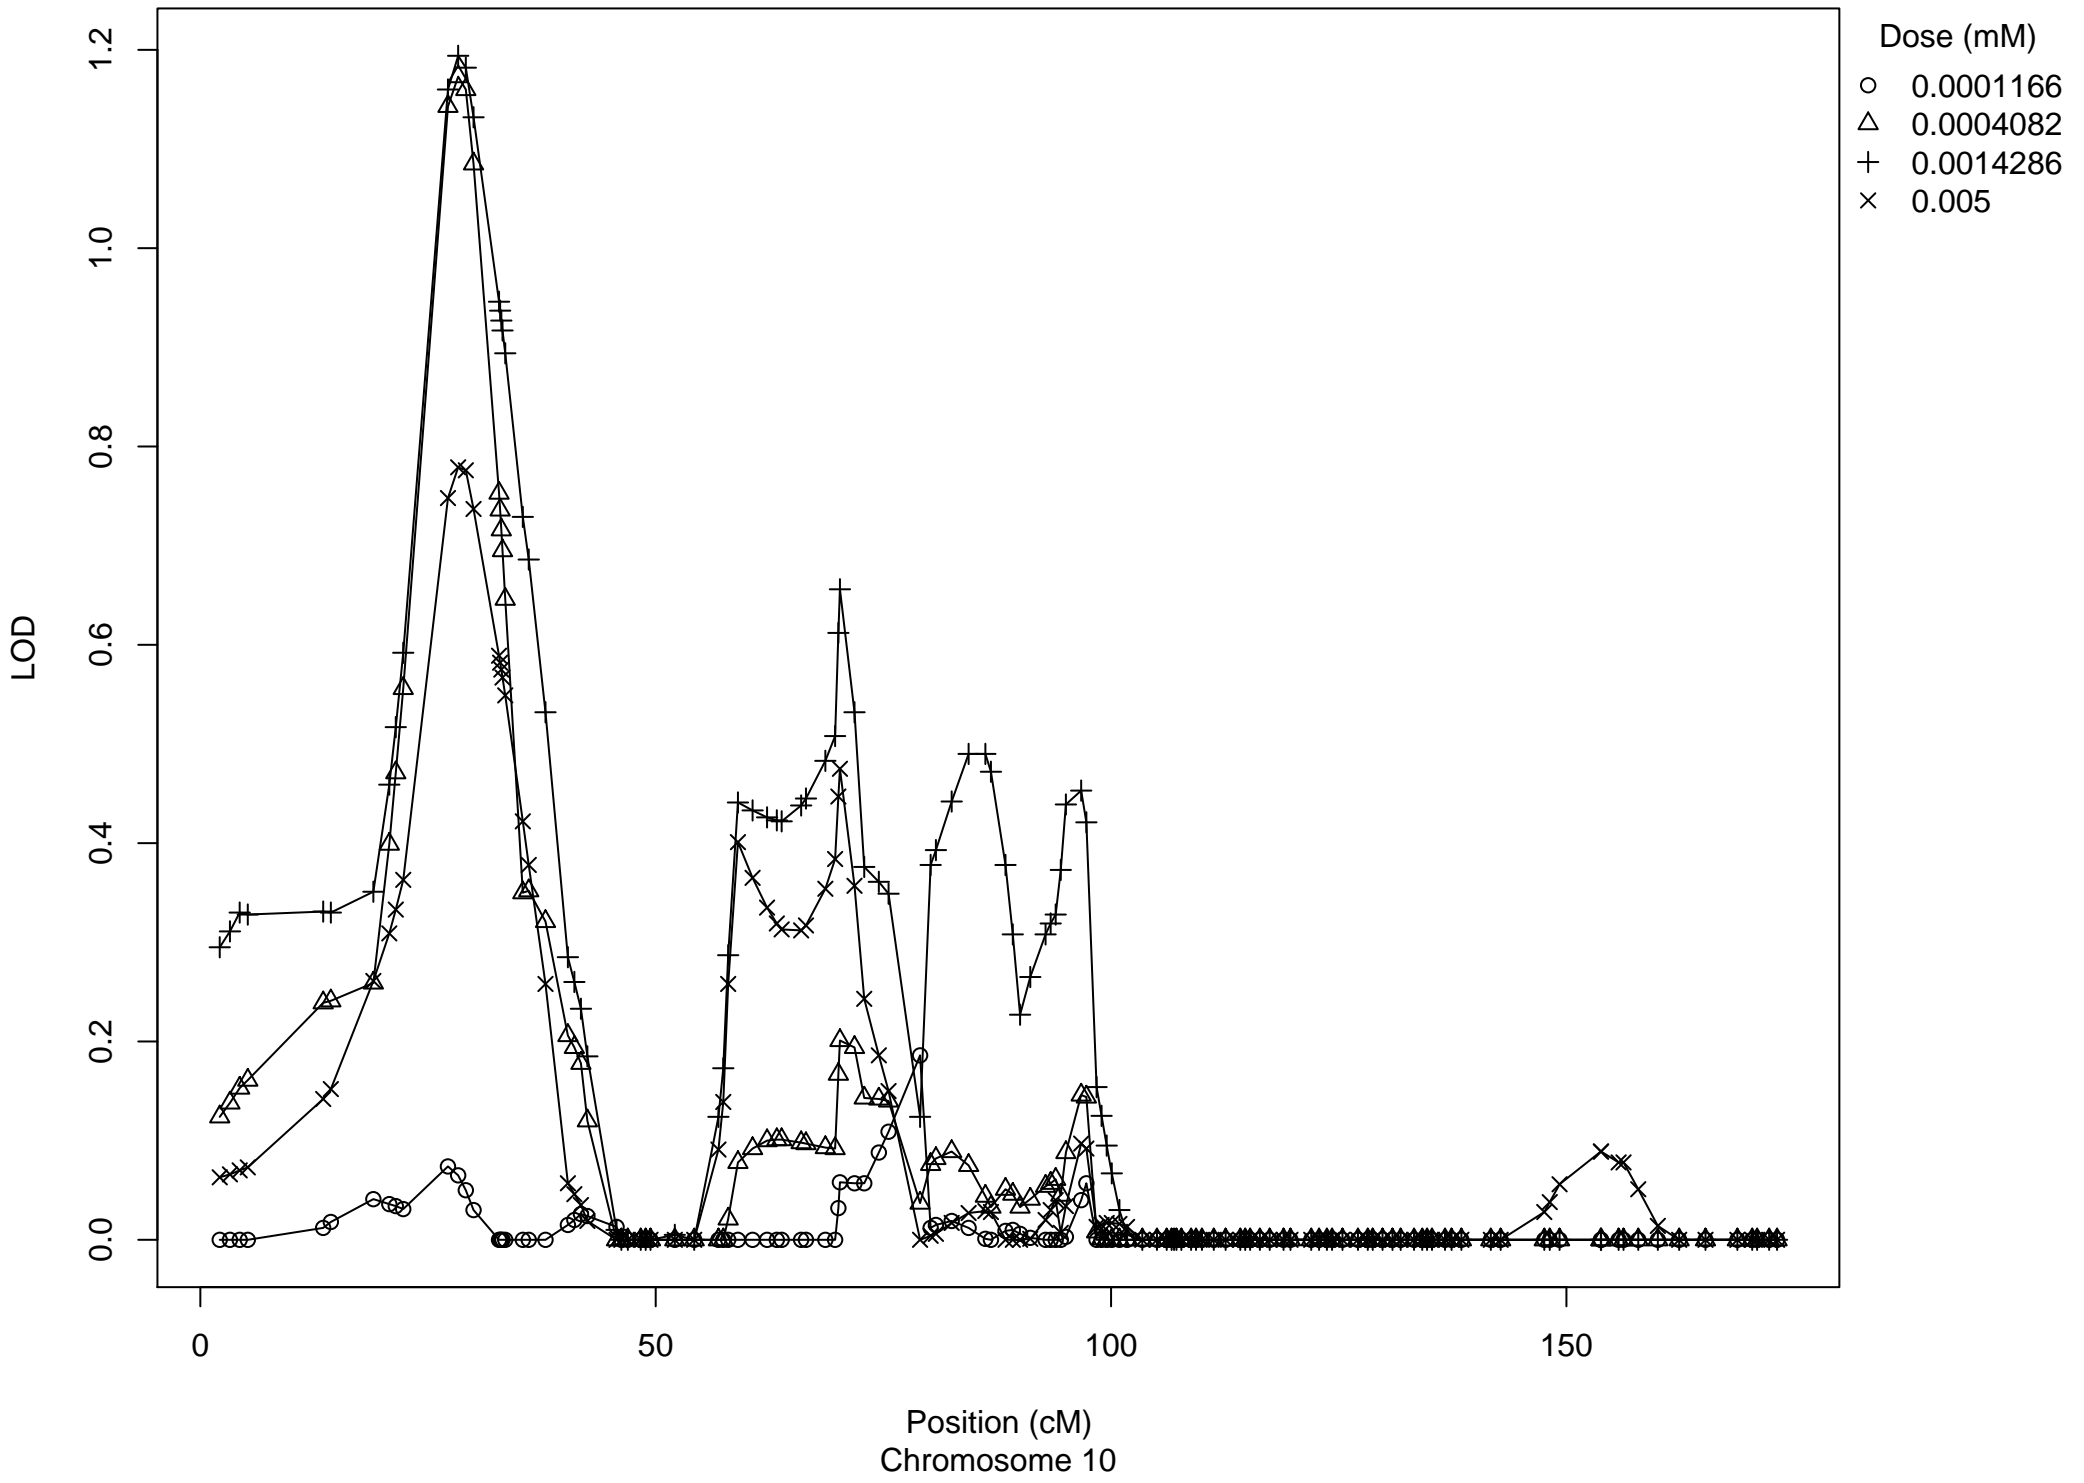



# Cytosine beta-D-arabinofuranoside (Cytar)

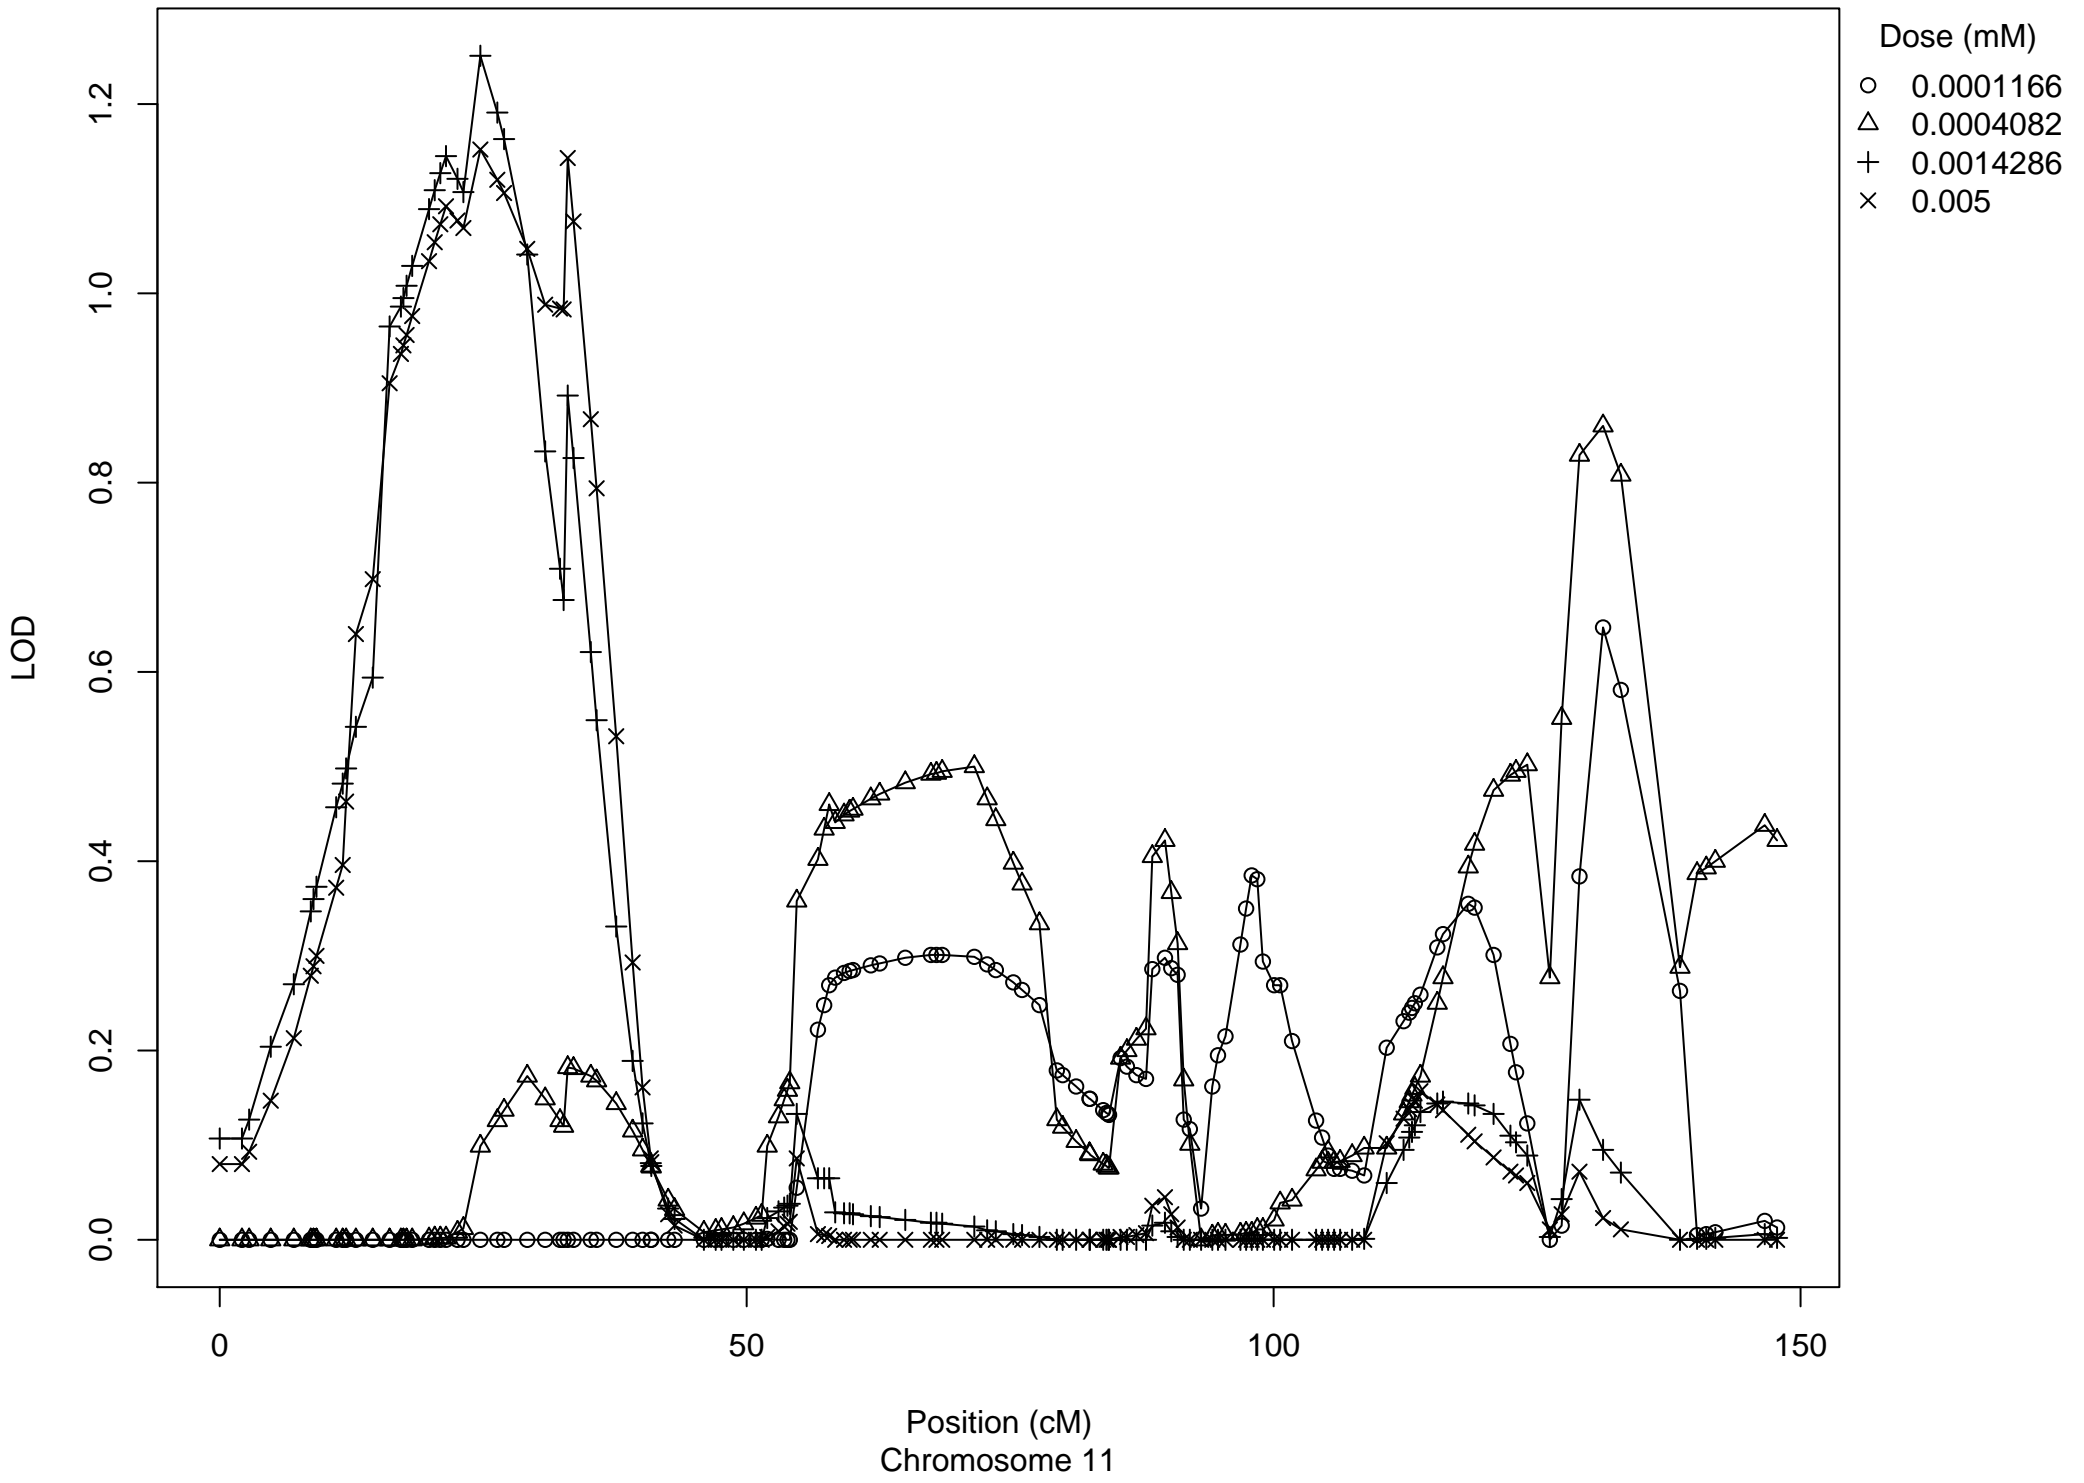

# Cytosine beta-D-arabinofuranoside (Cytar)

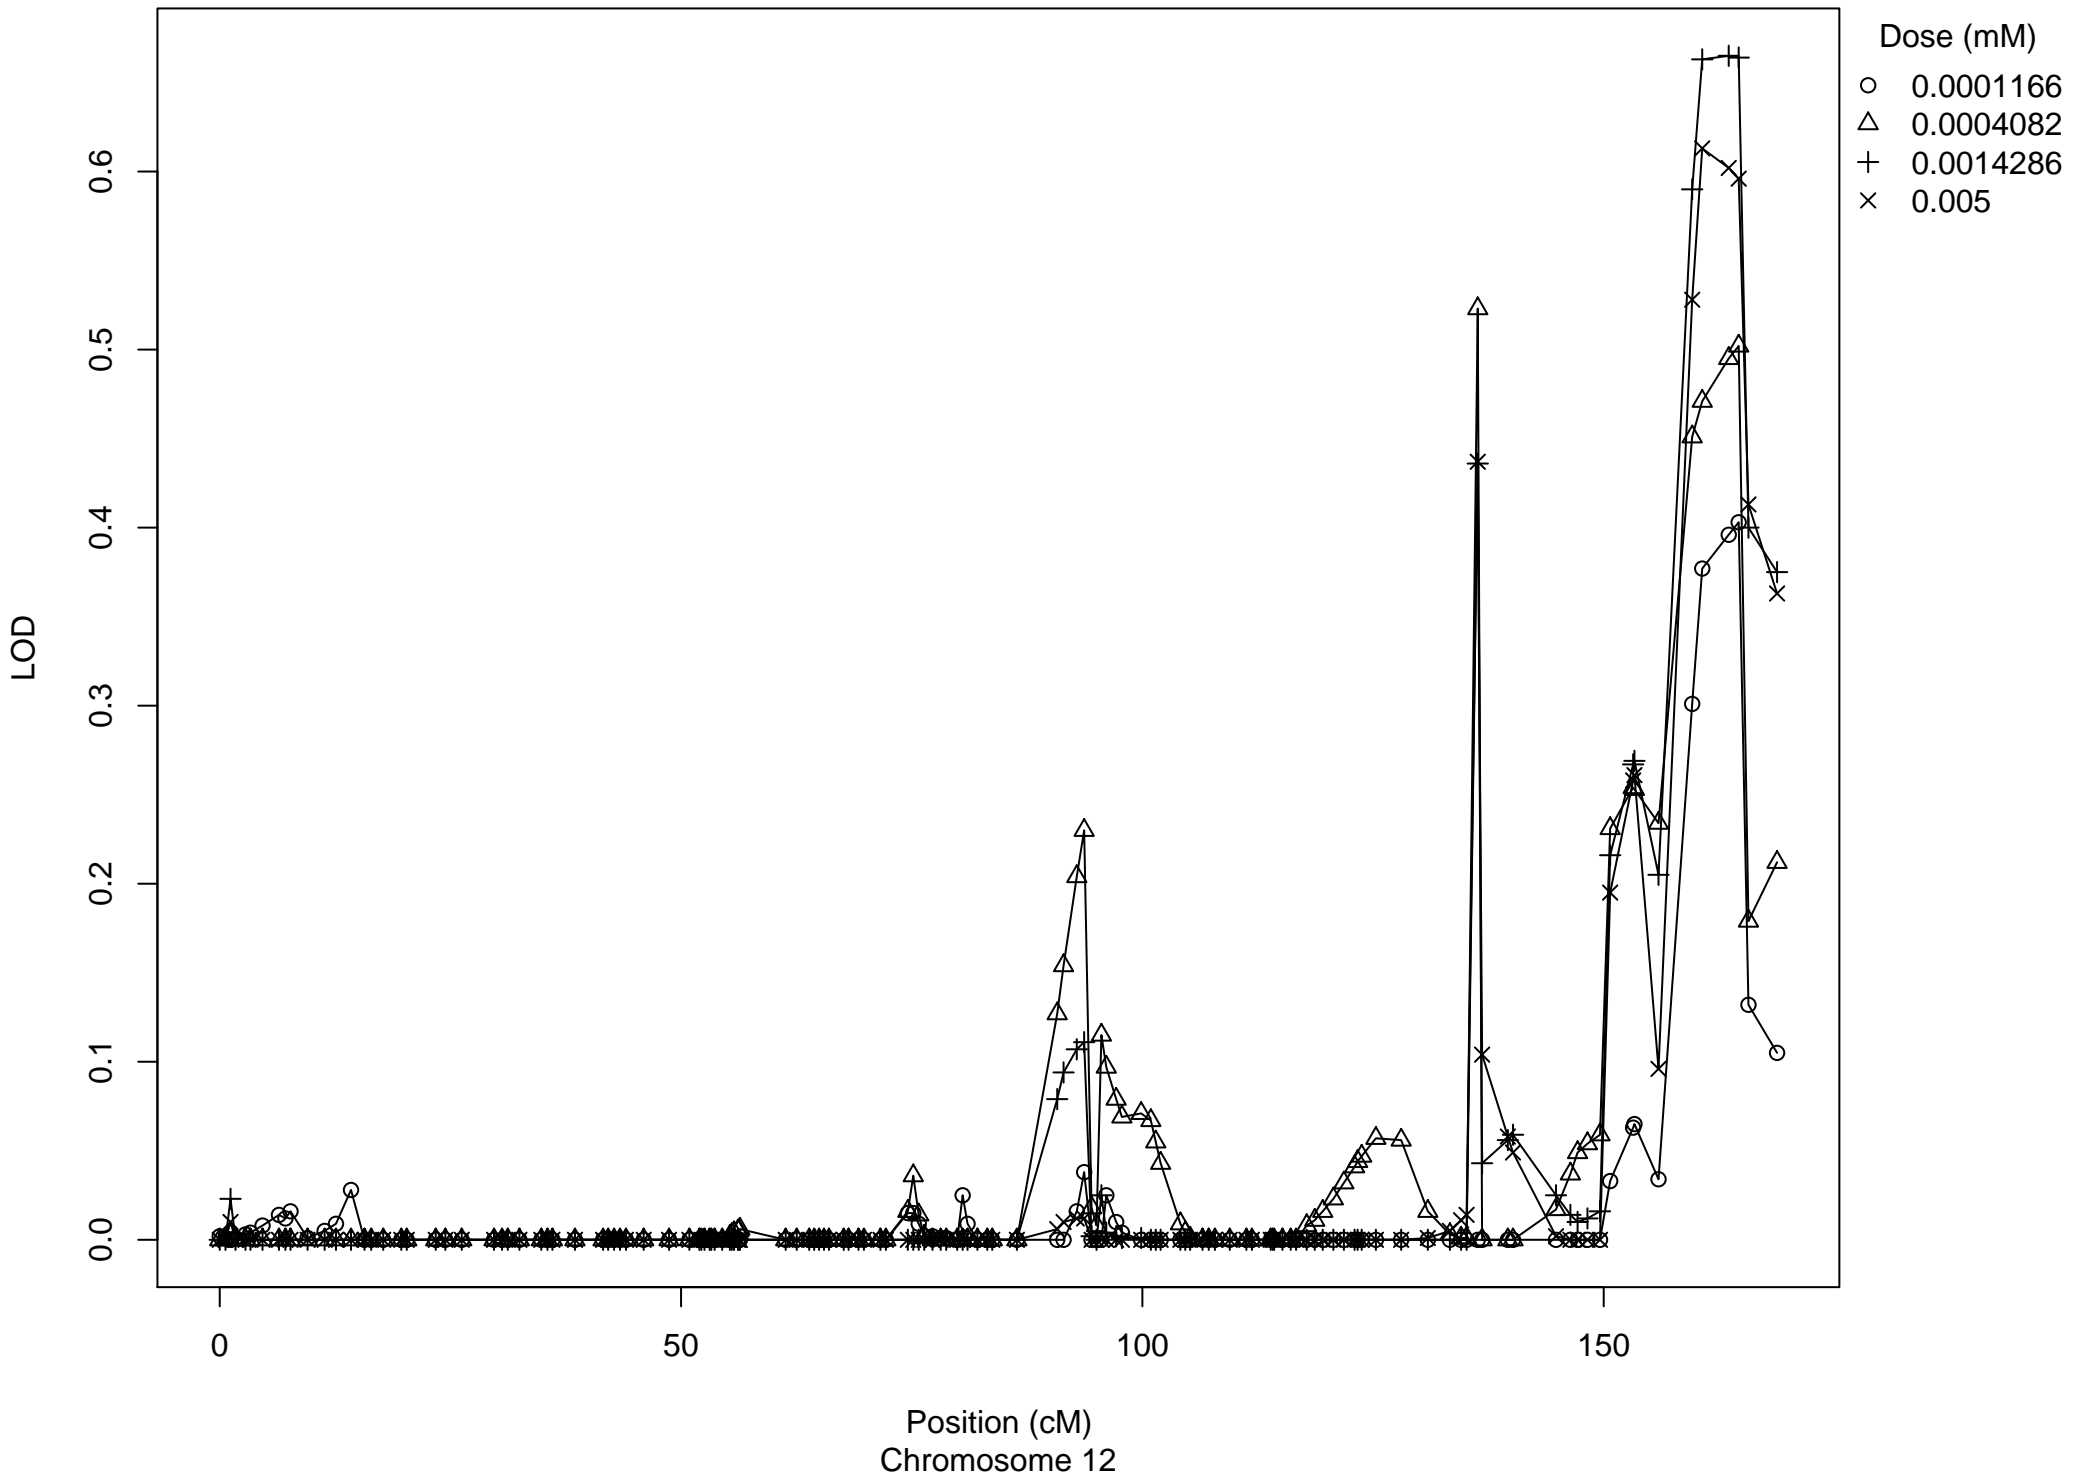

# Cytosine beta-D-arabinofuranoside (Cytar)

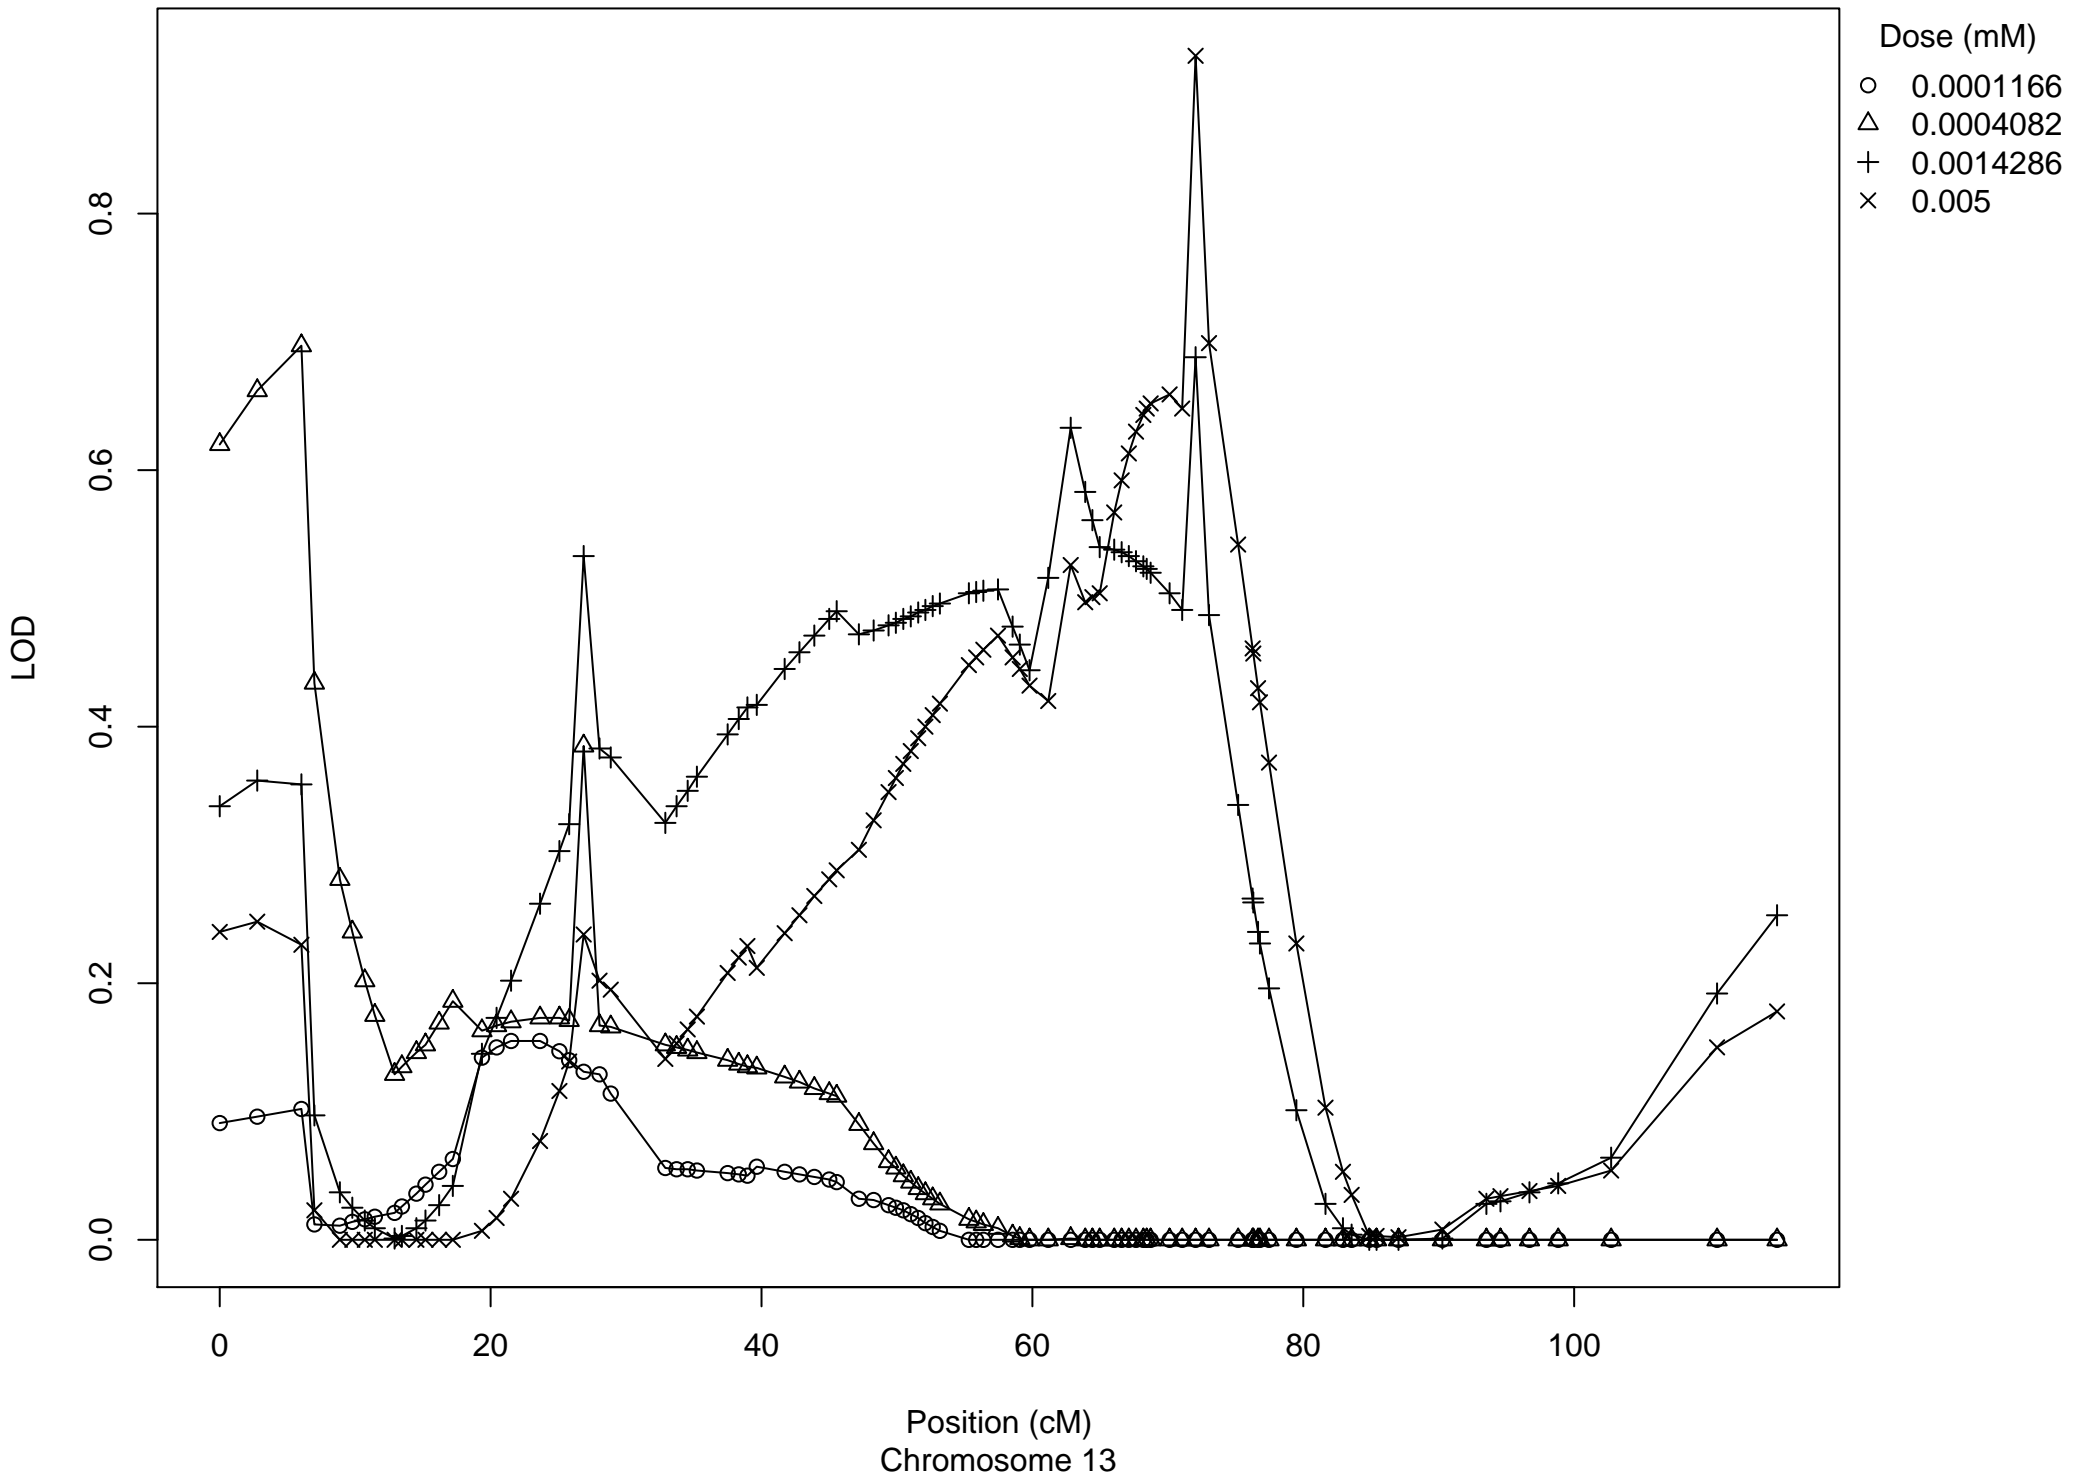

# Cytosine beta-D-arabinofuranoside (Cytar)

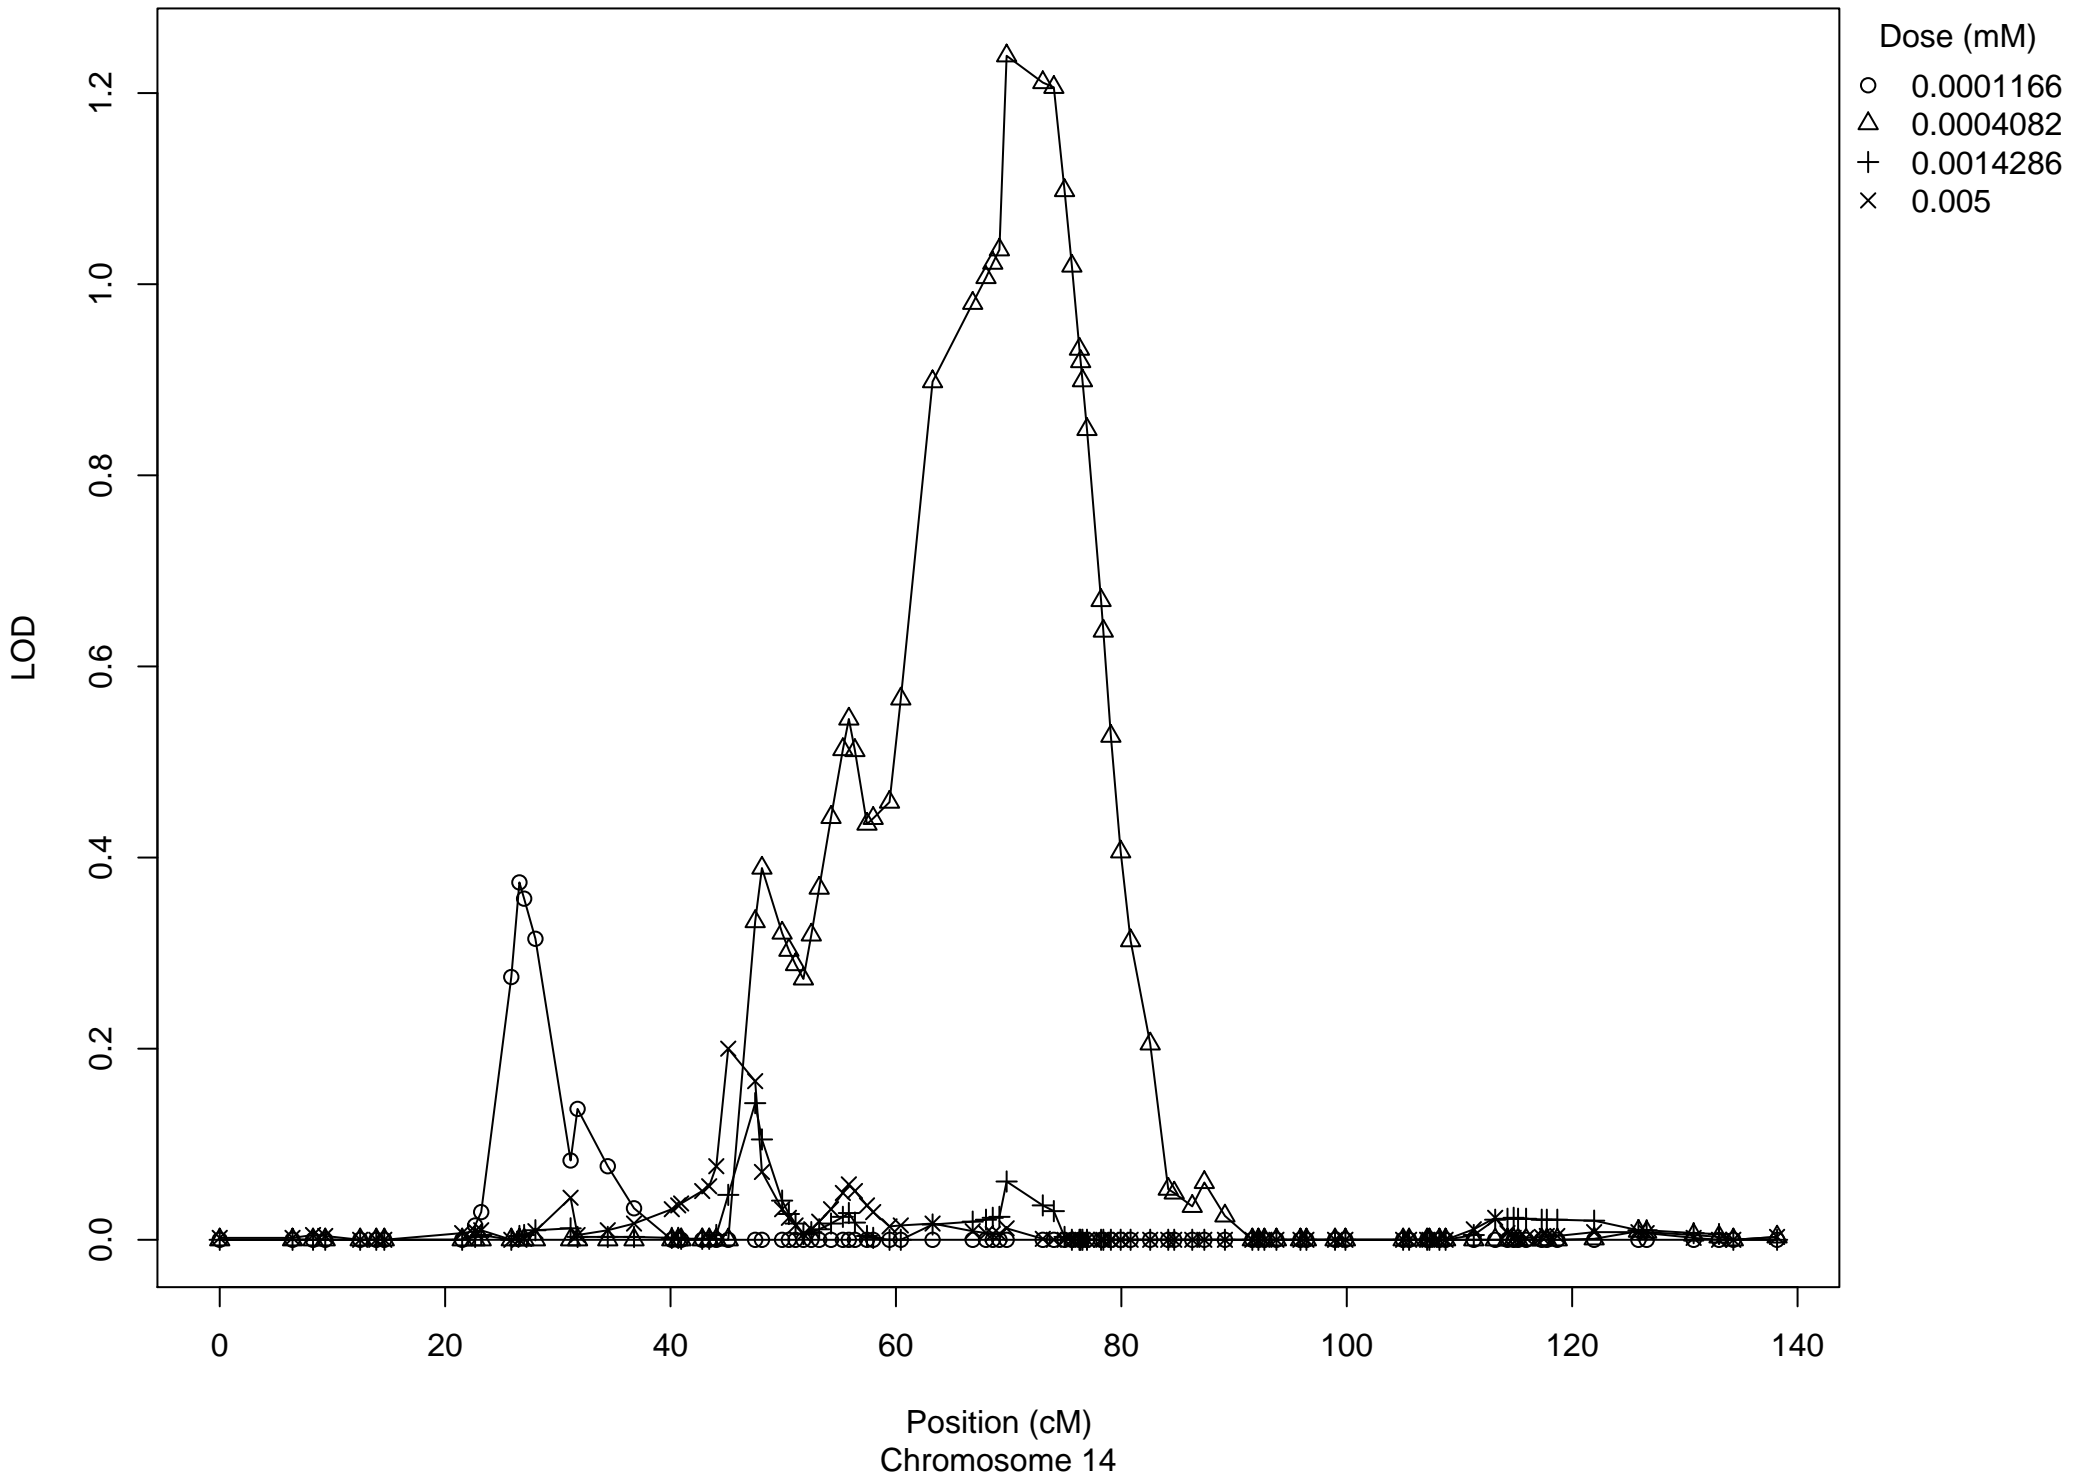

# Cytosine beta-D-arabinofuranoside (Cytar)

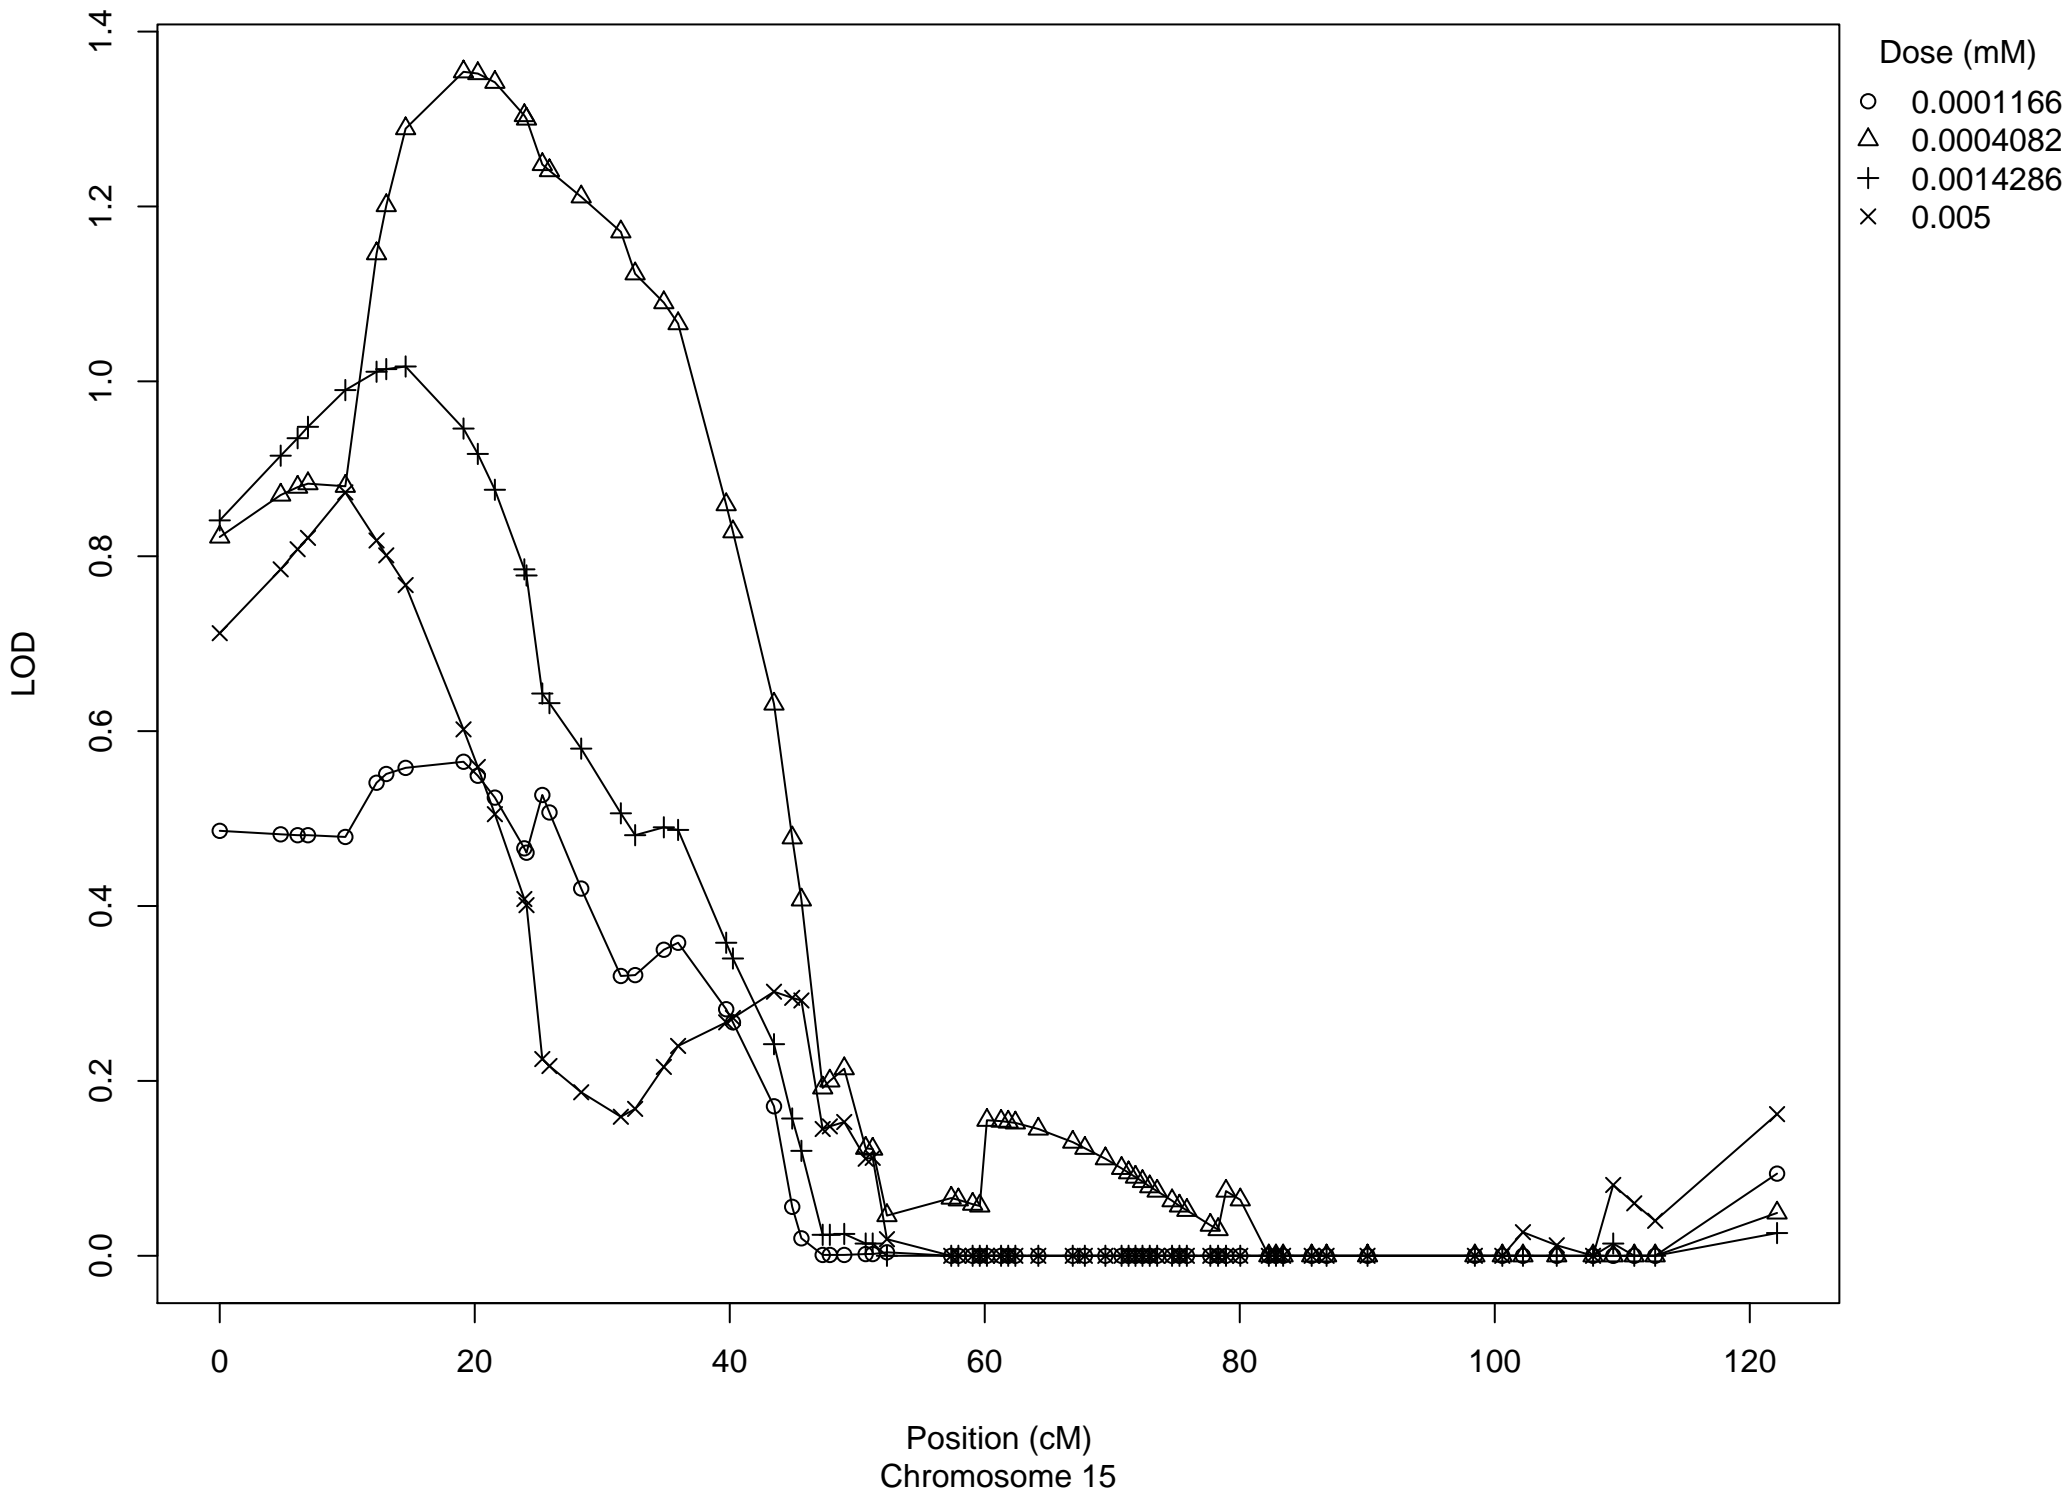

# Cytosine beta-D-arabinofuranoside (Cytar)

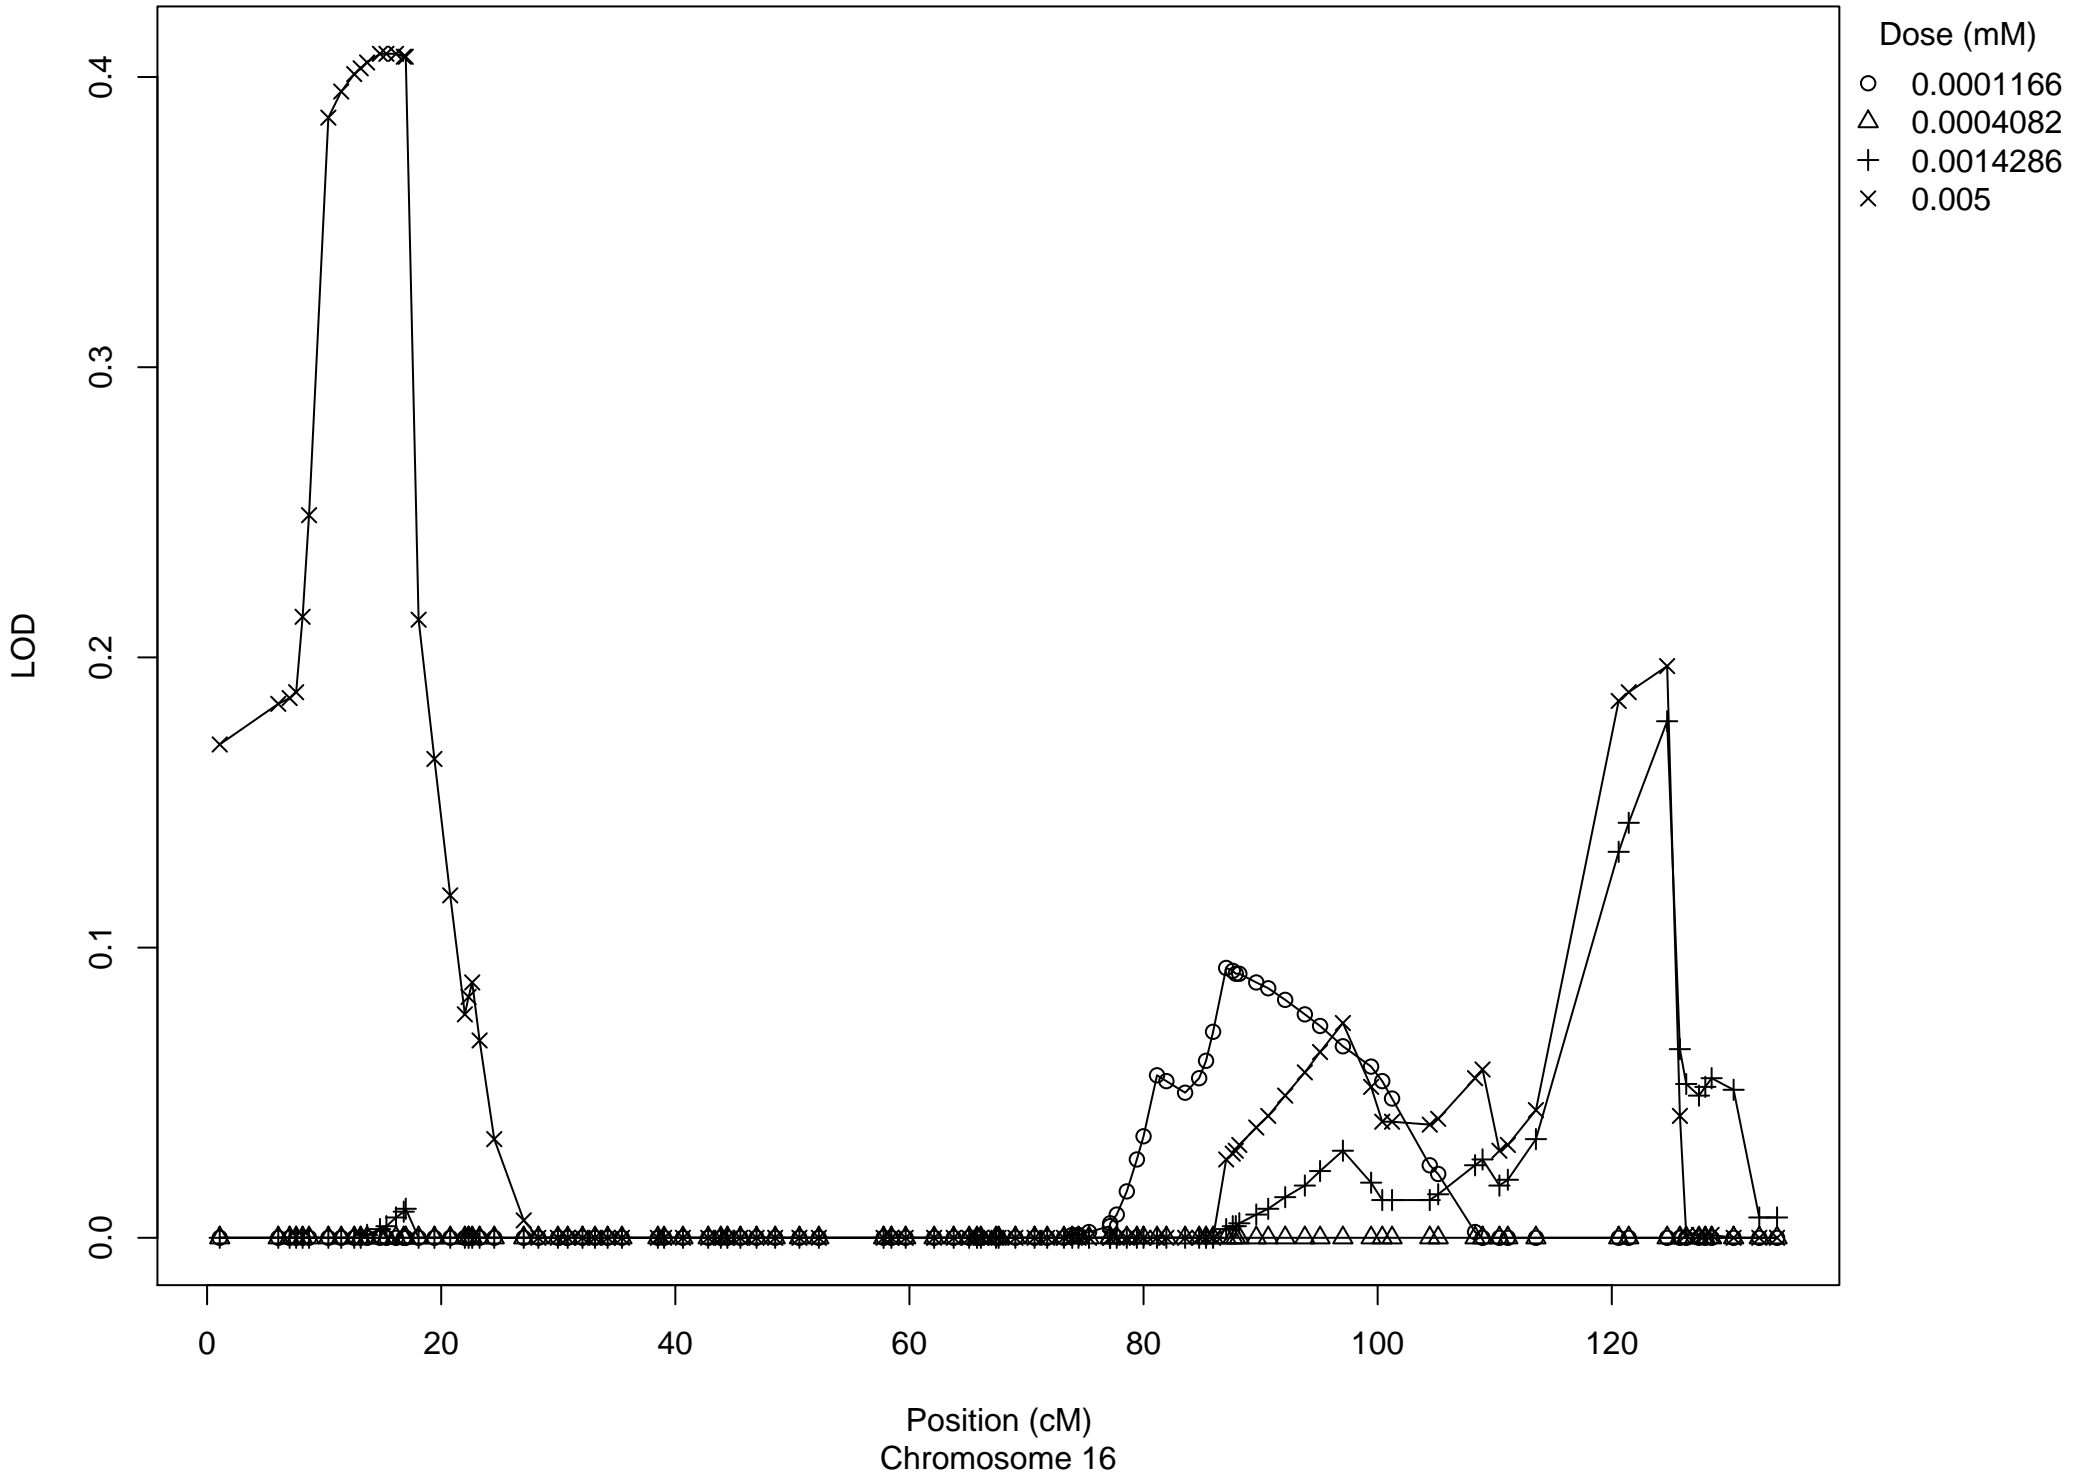

# Cytosine beta-D-arabinofuranoside (Cytar)

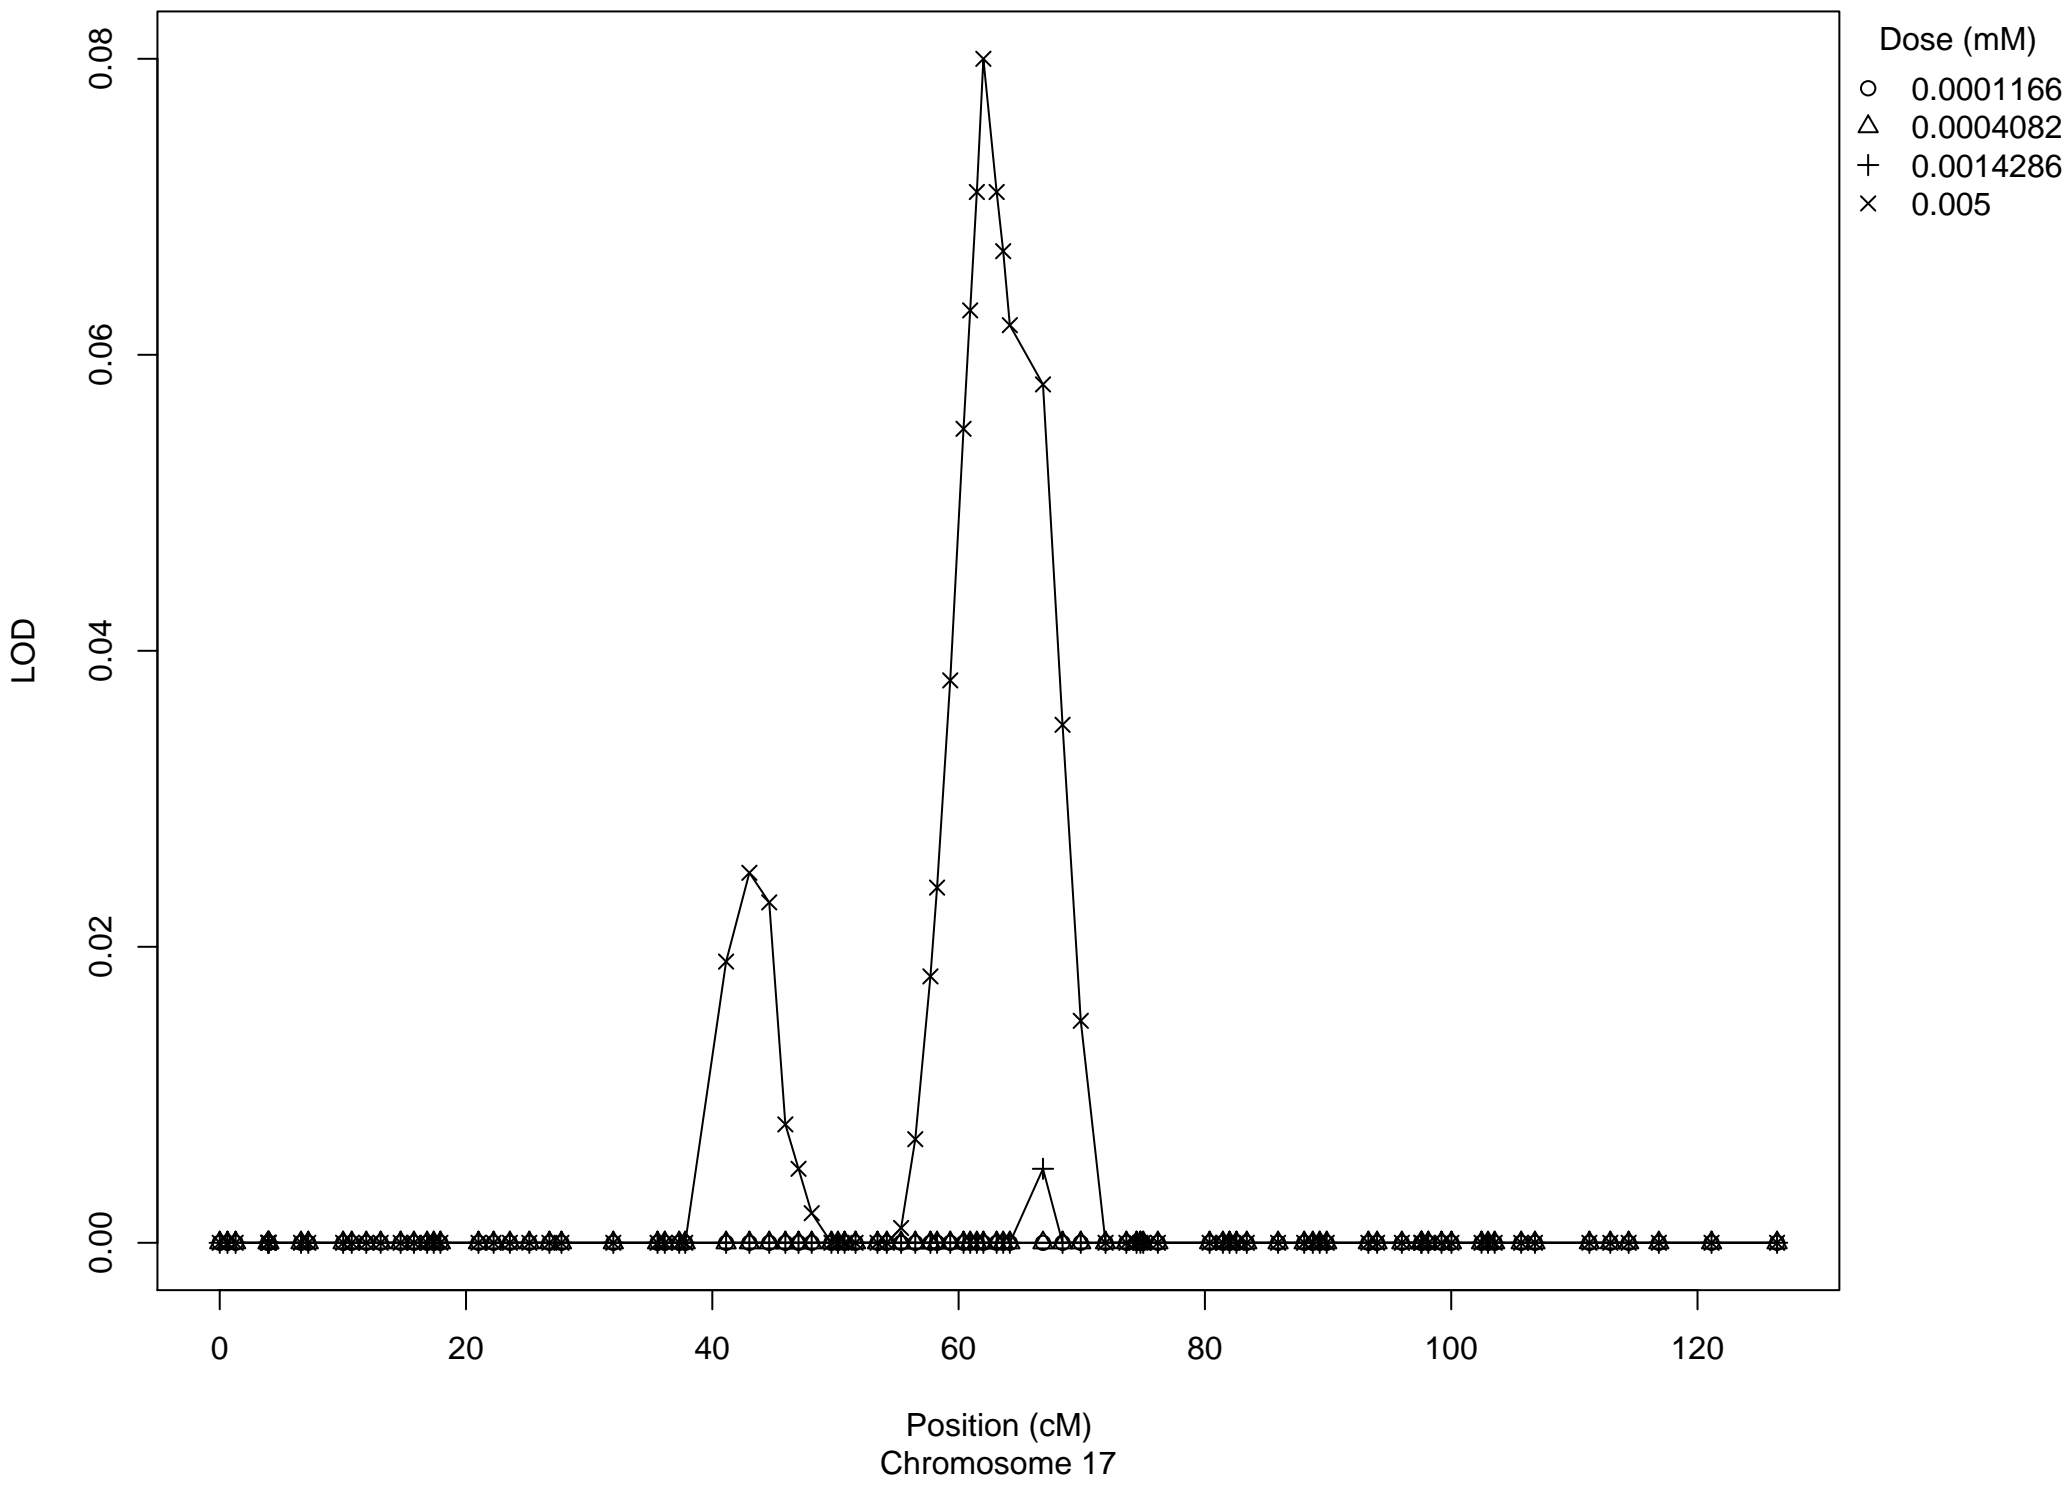

# Cytosine beta-D-arabinofuranoside (Cytar)

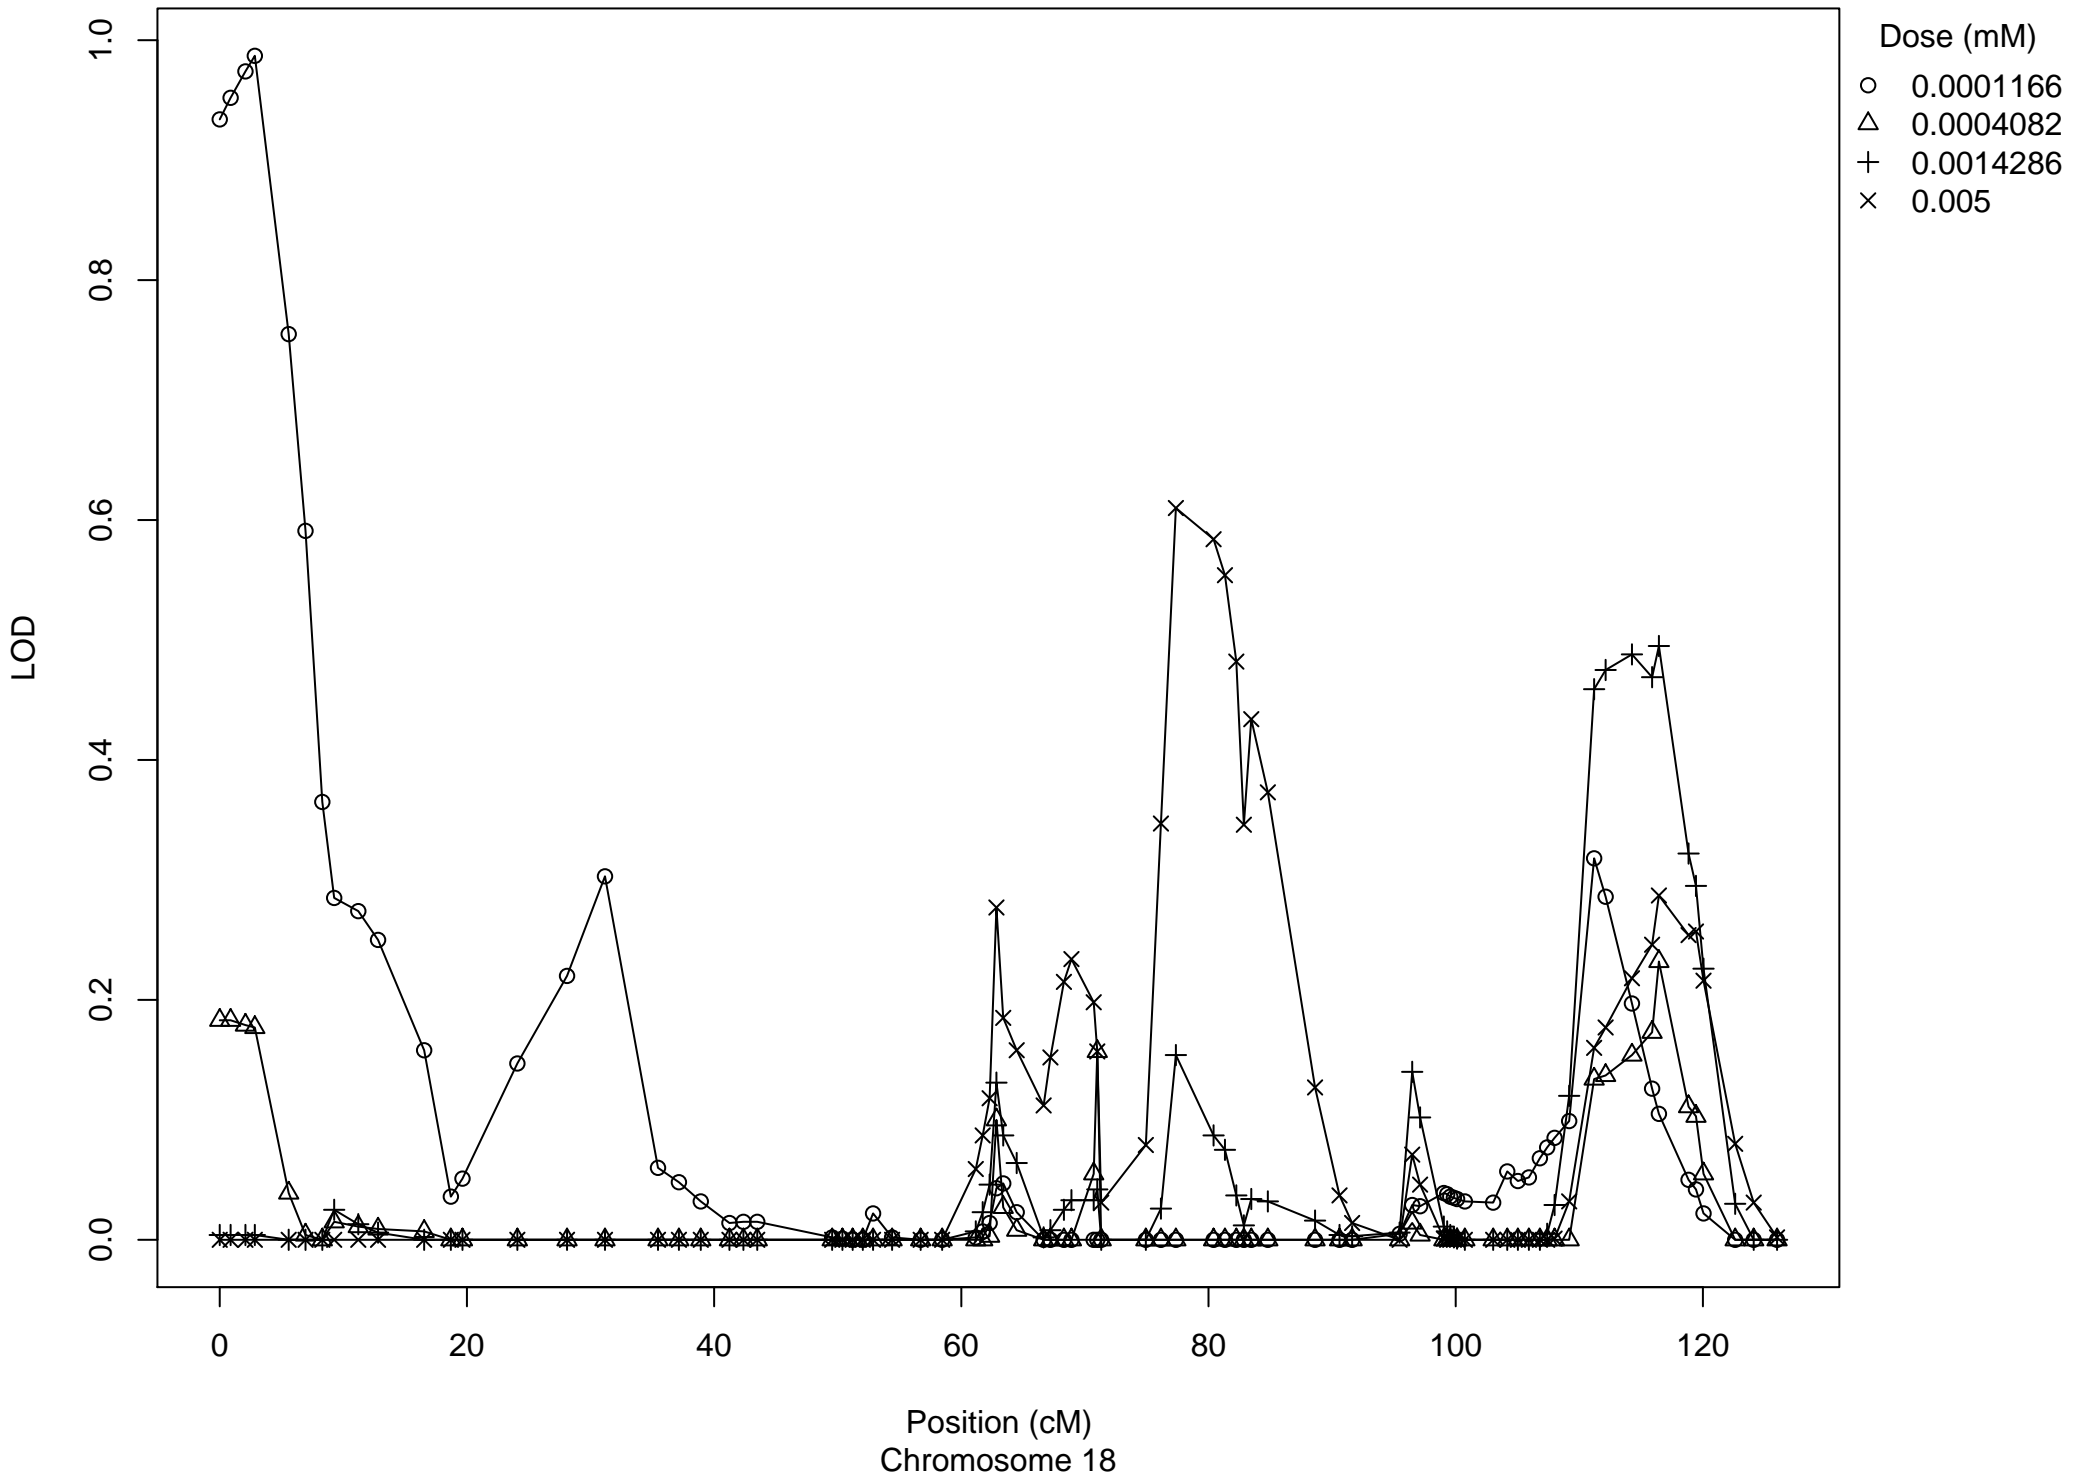



# Cytosine beta-D-arabinofuranoside (Cytar)

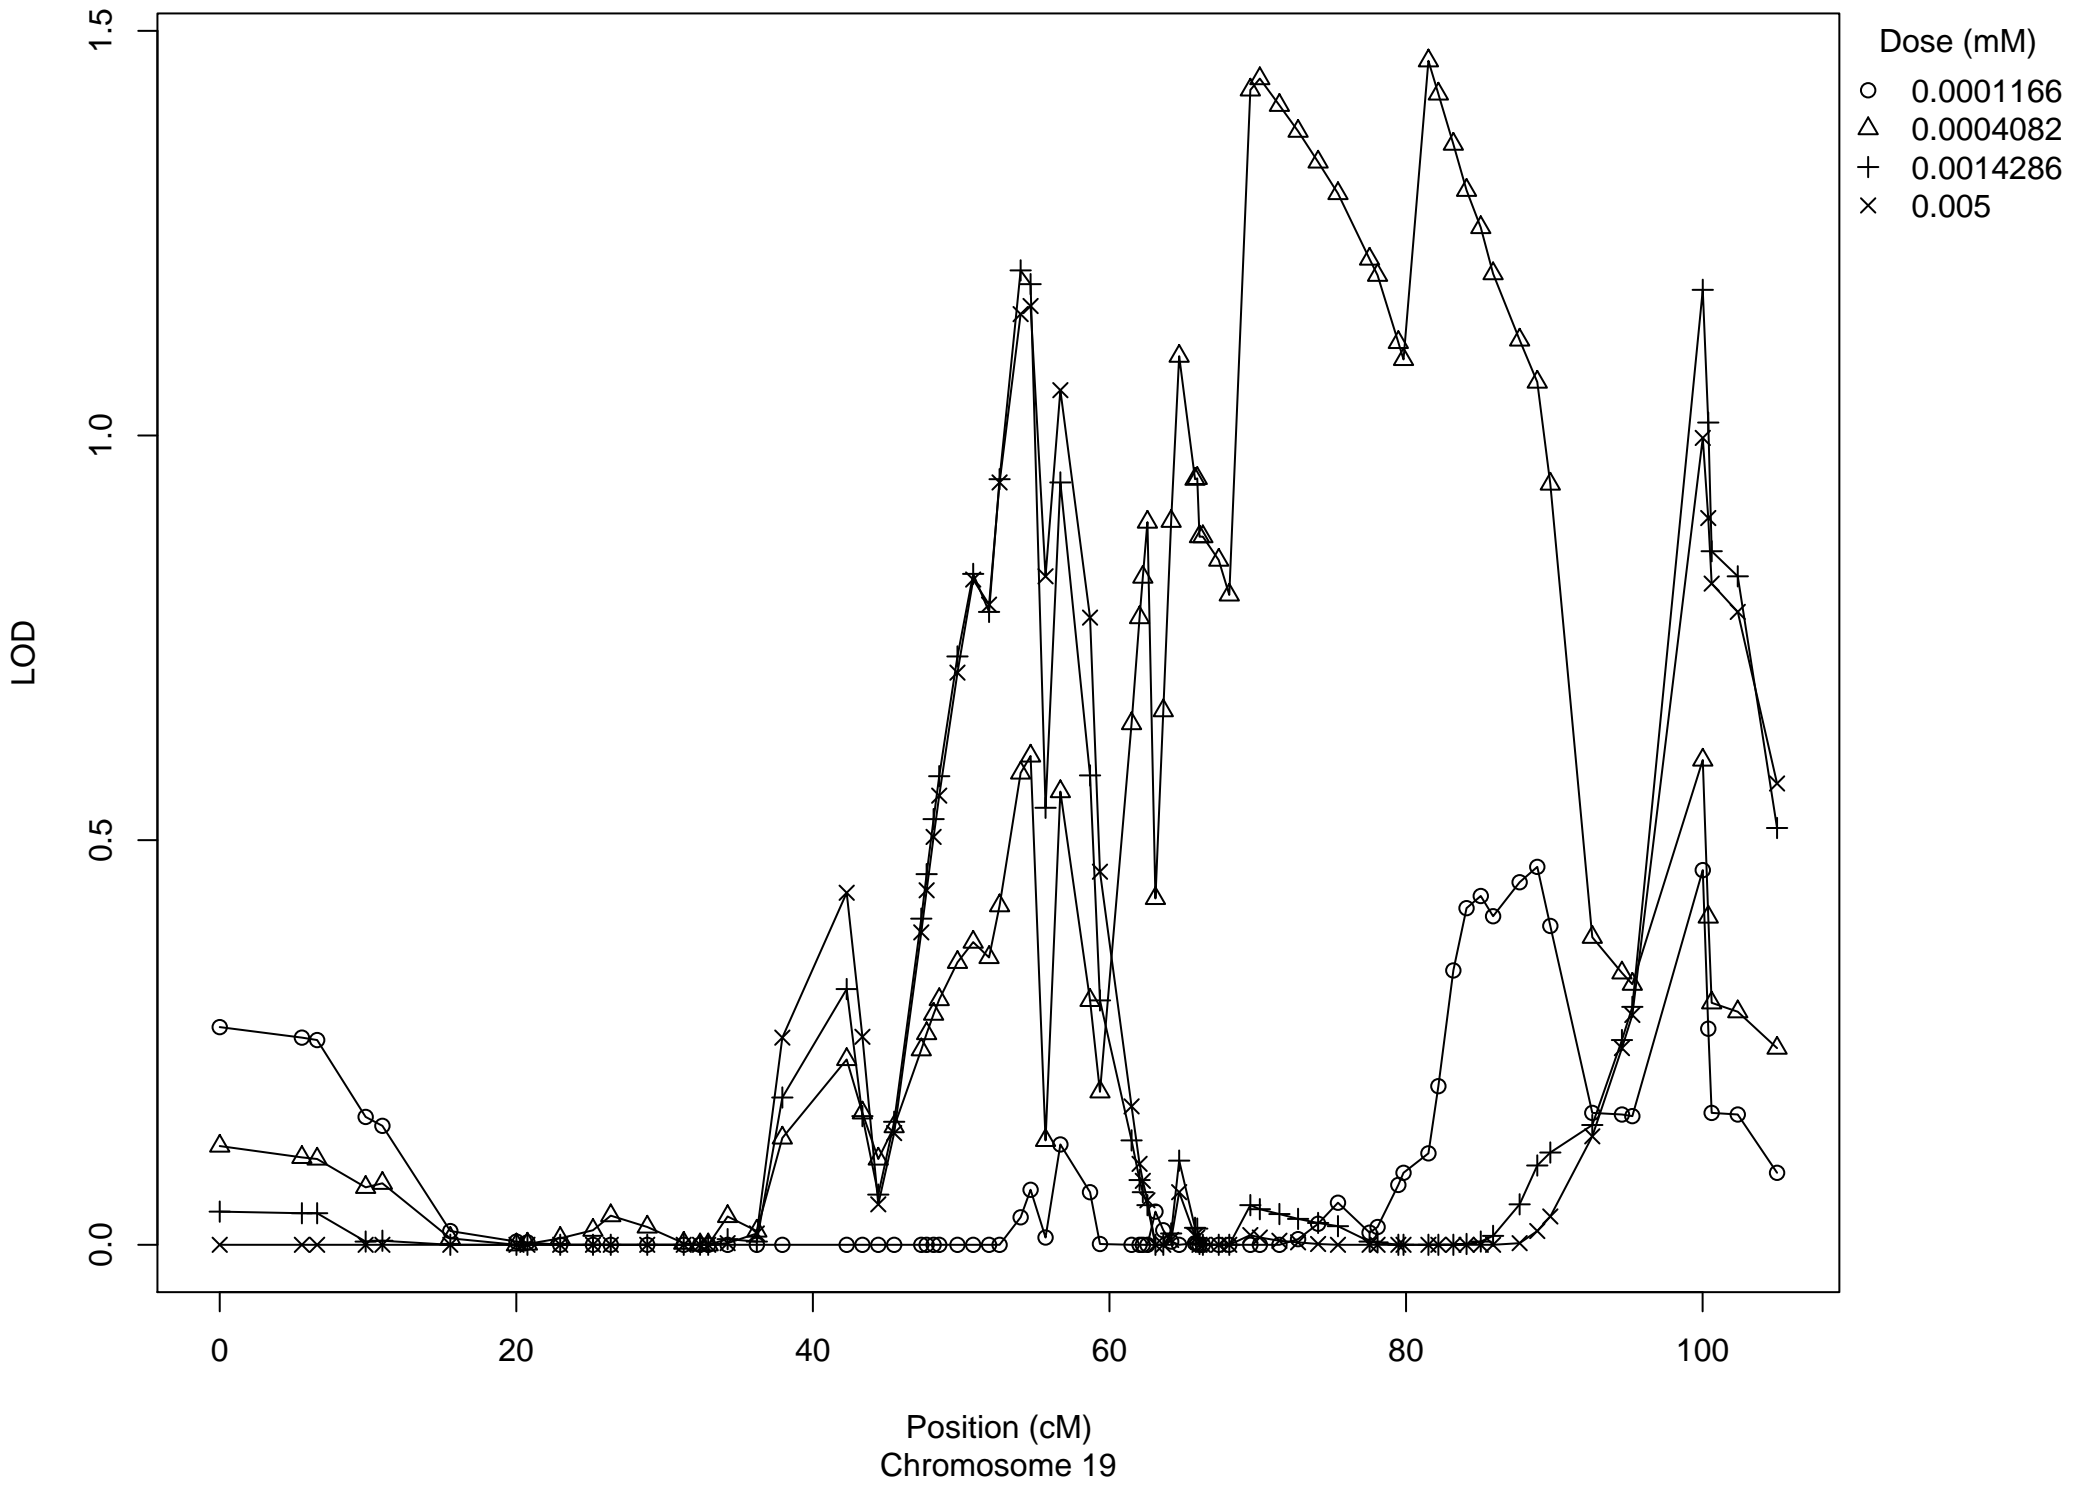

# Cytosine beta-D-arabinofuranoside (Cytar)

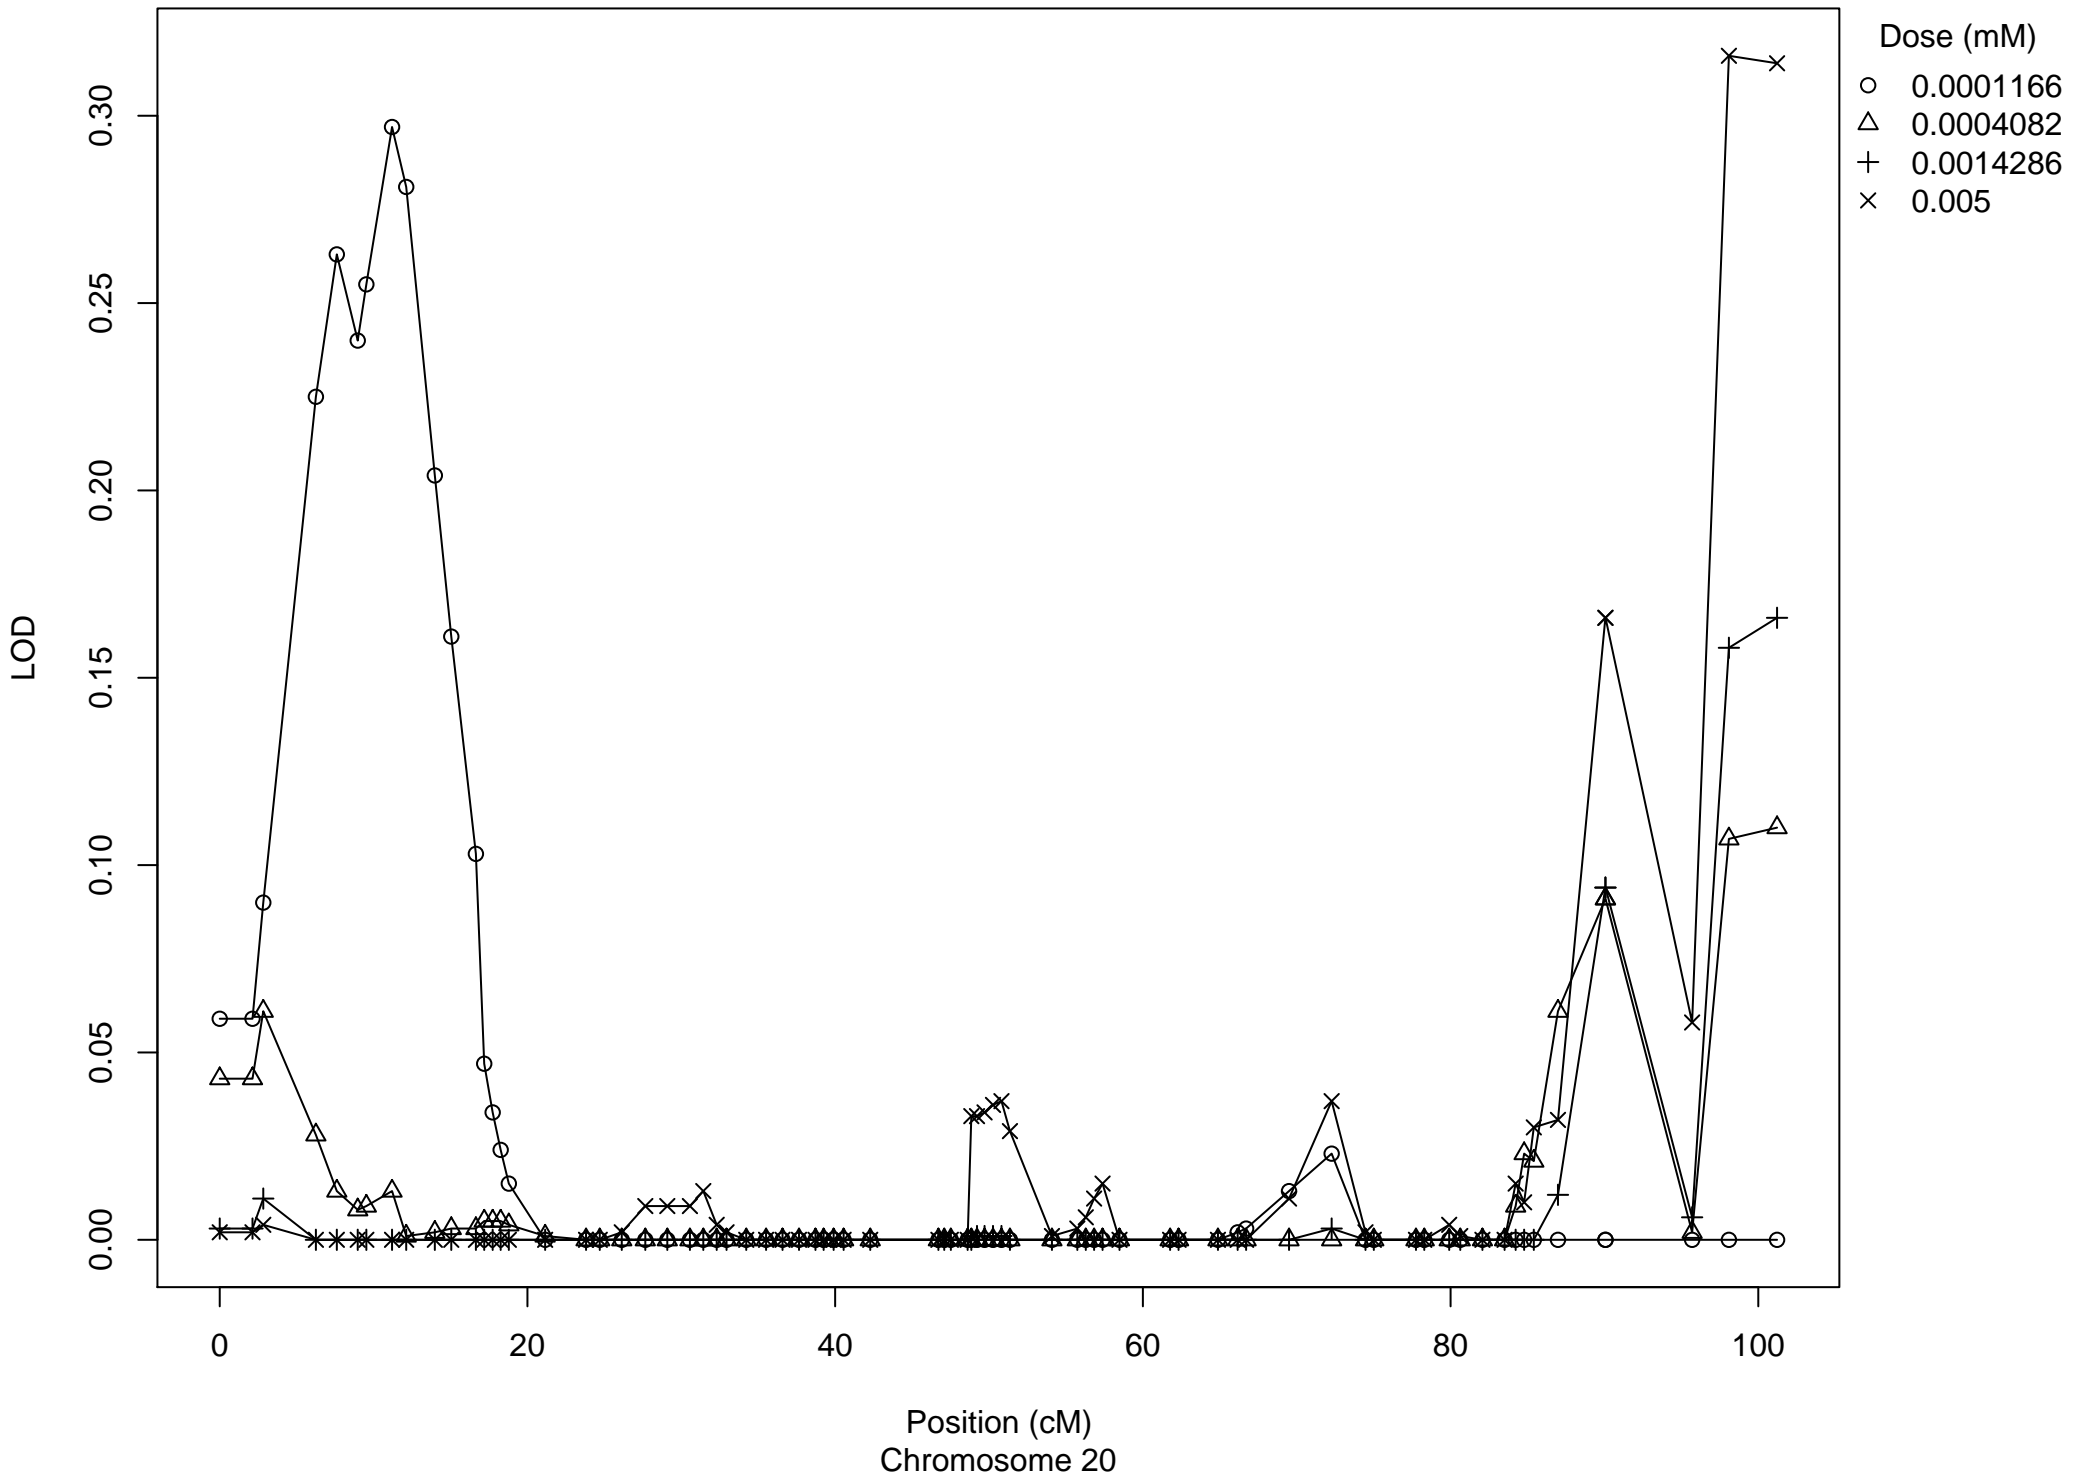

# Cytosine beta-D-arabinofuranoside (Cytar)

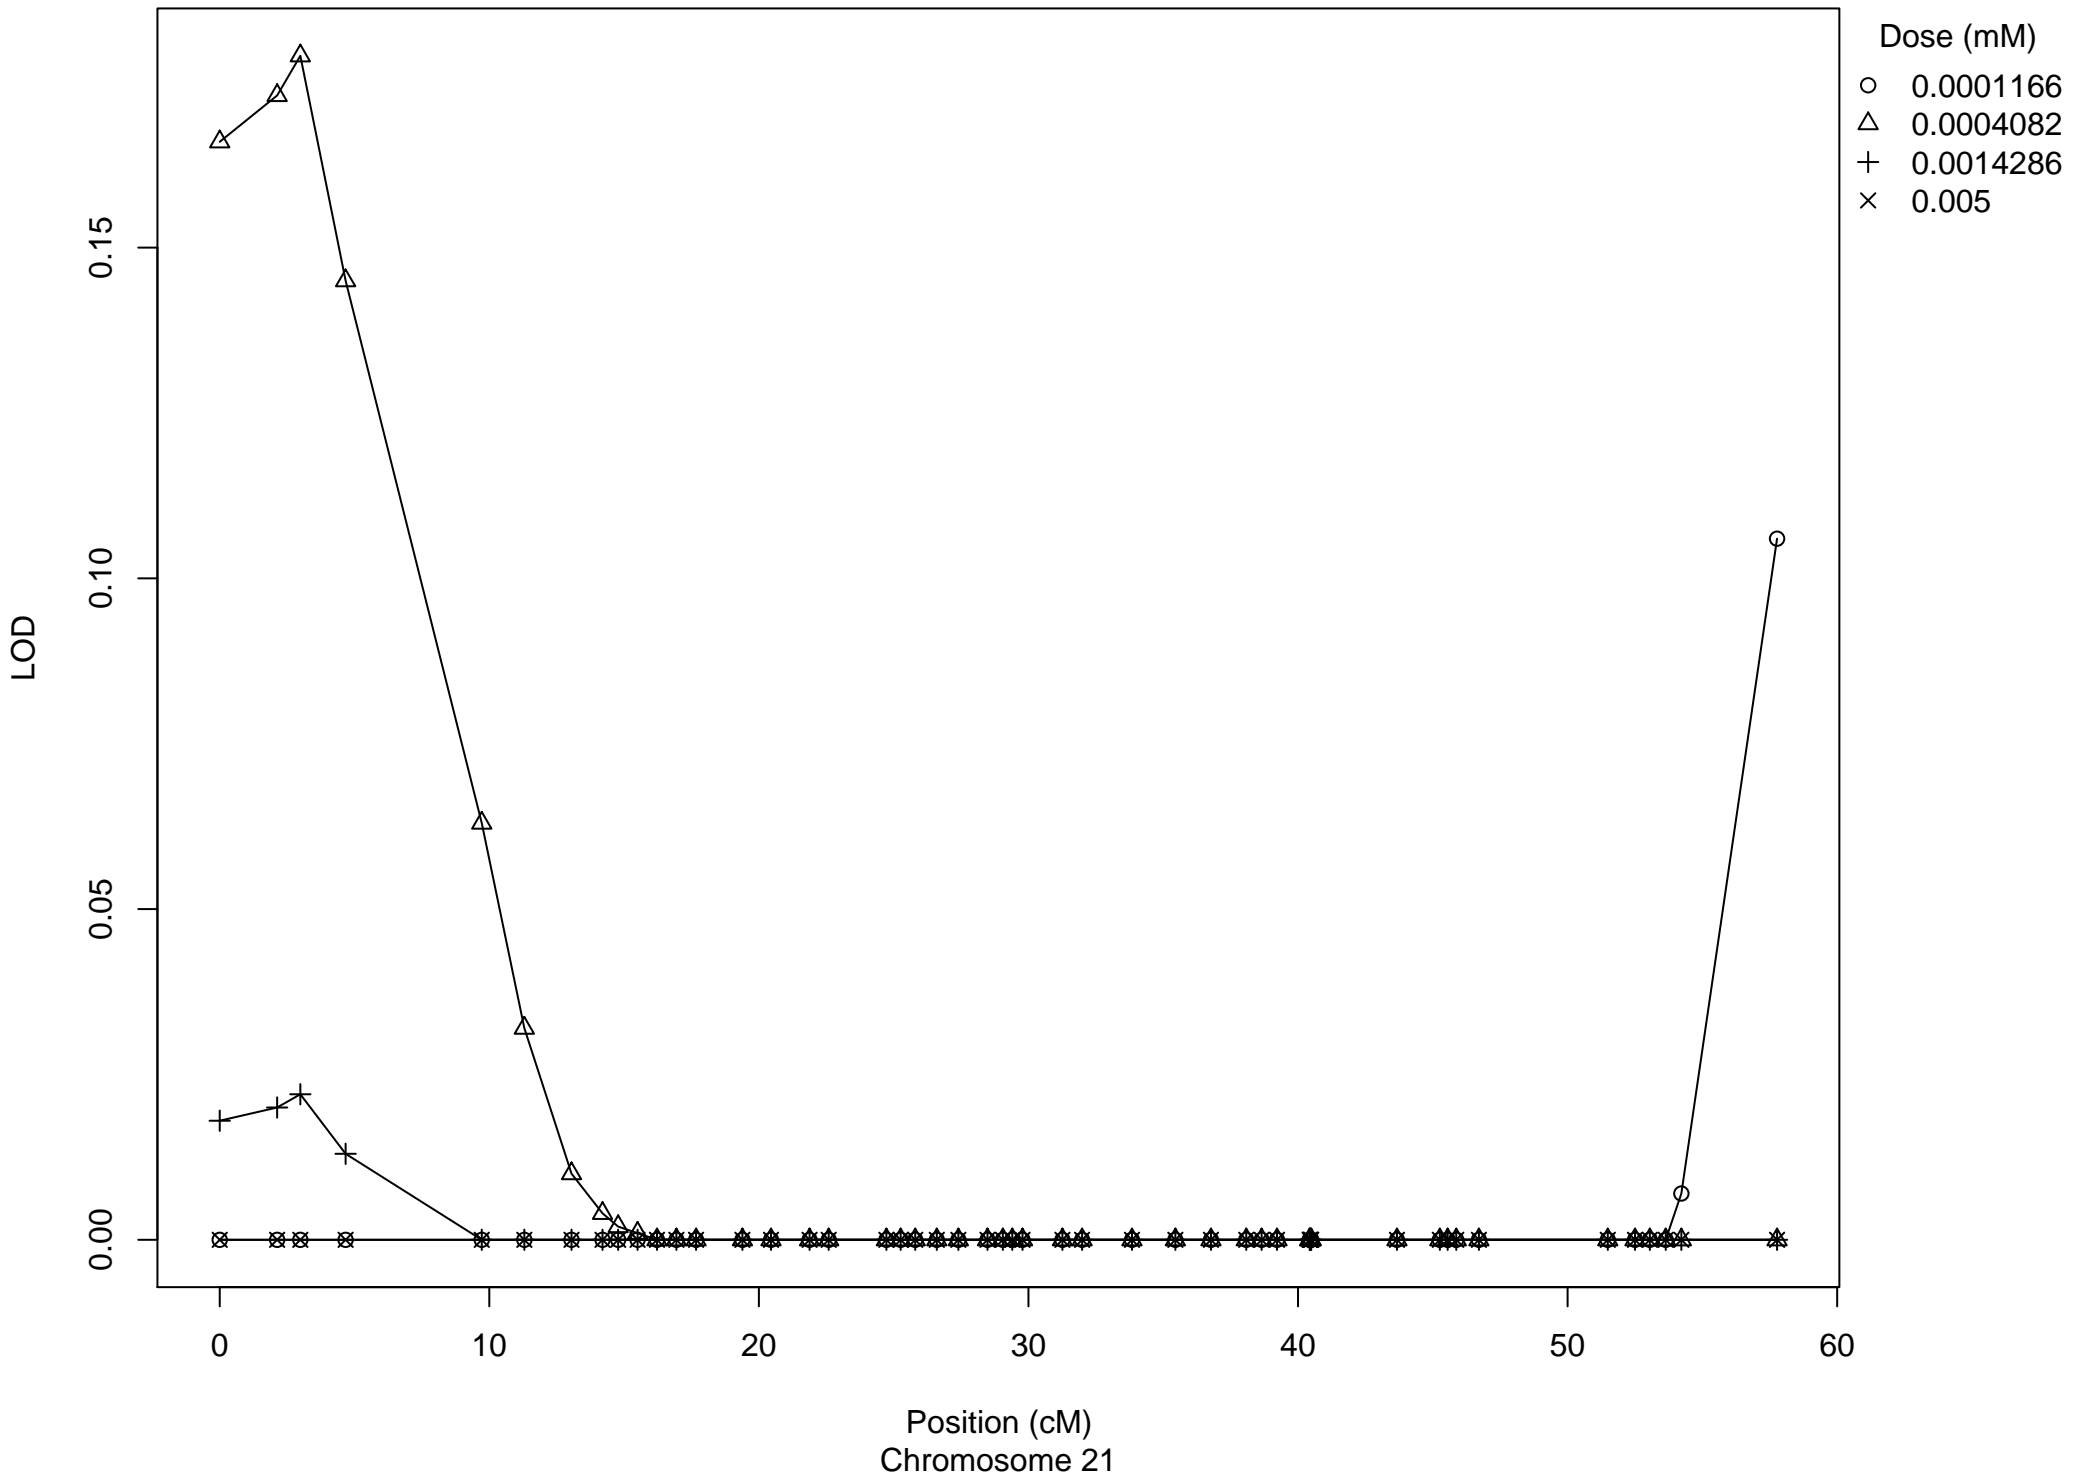

# Cytosine beta-D-arabinofuranoside (Cytar)

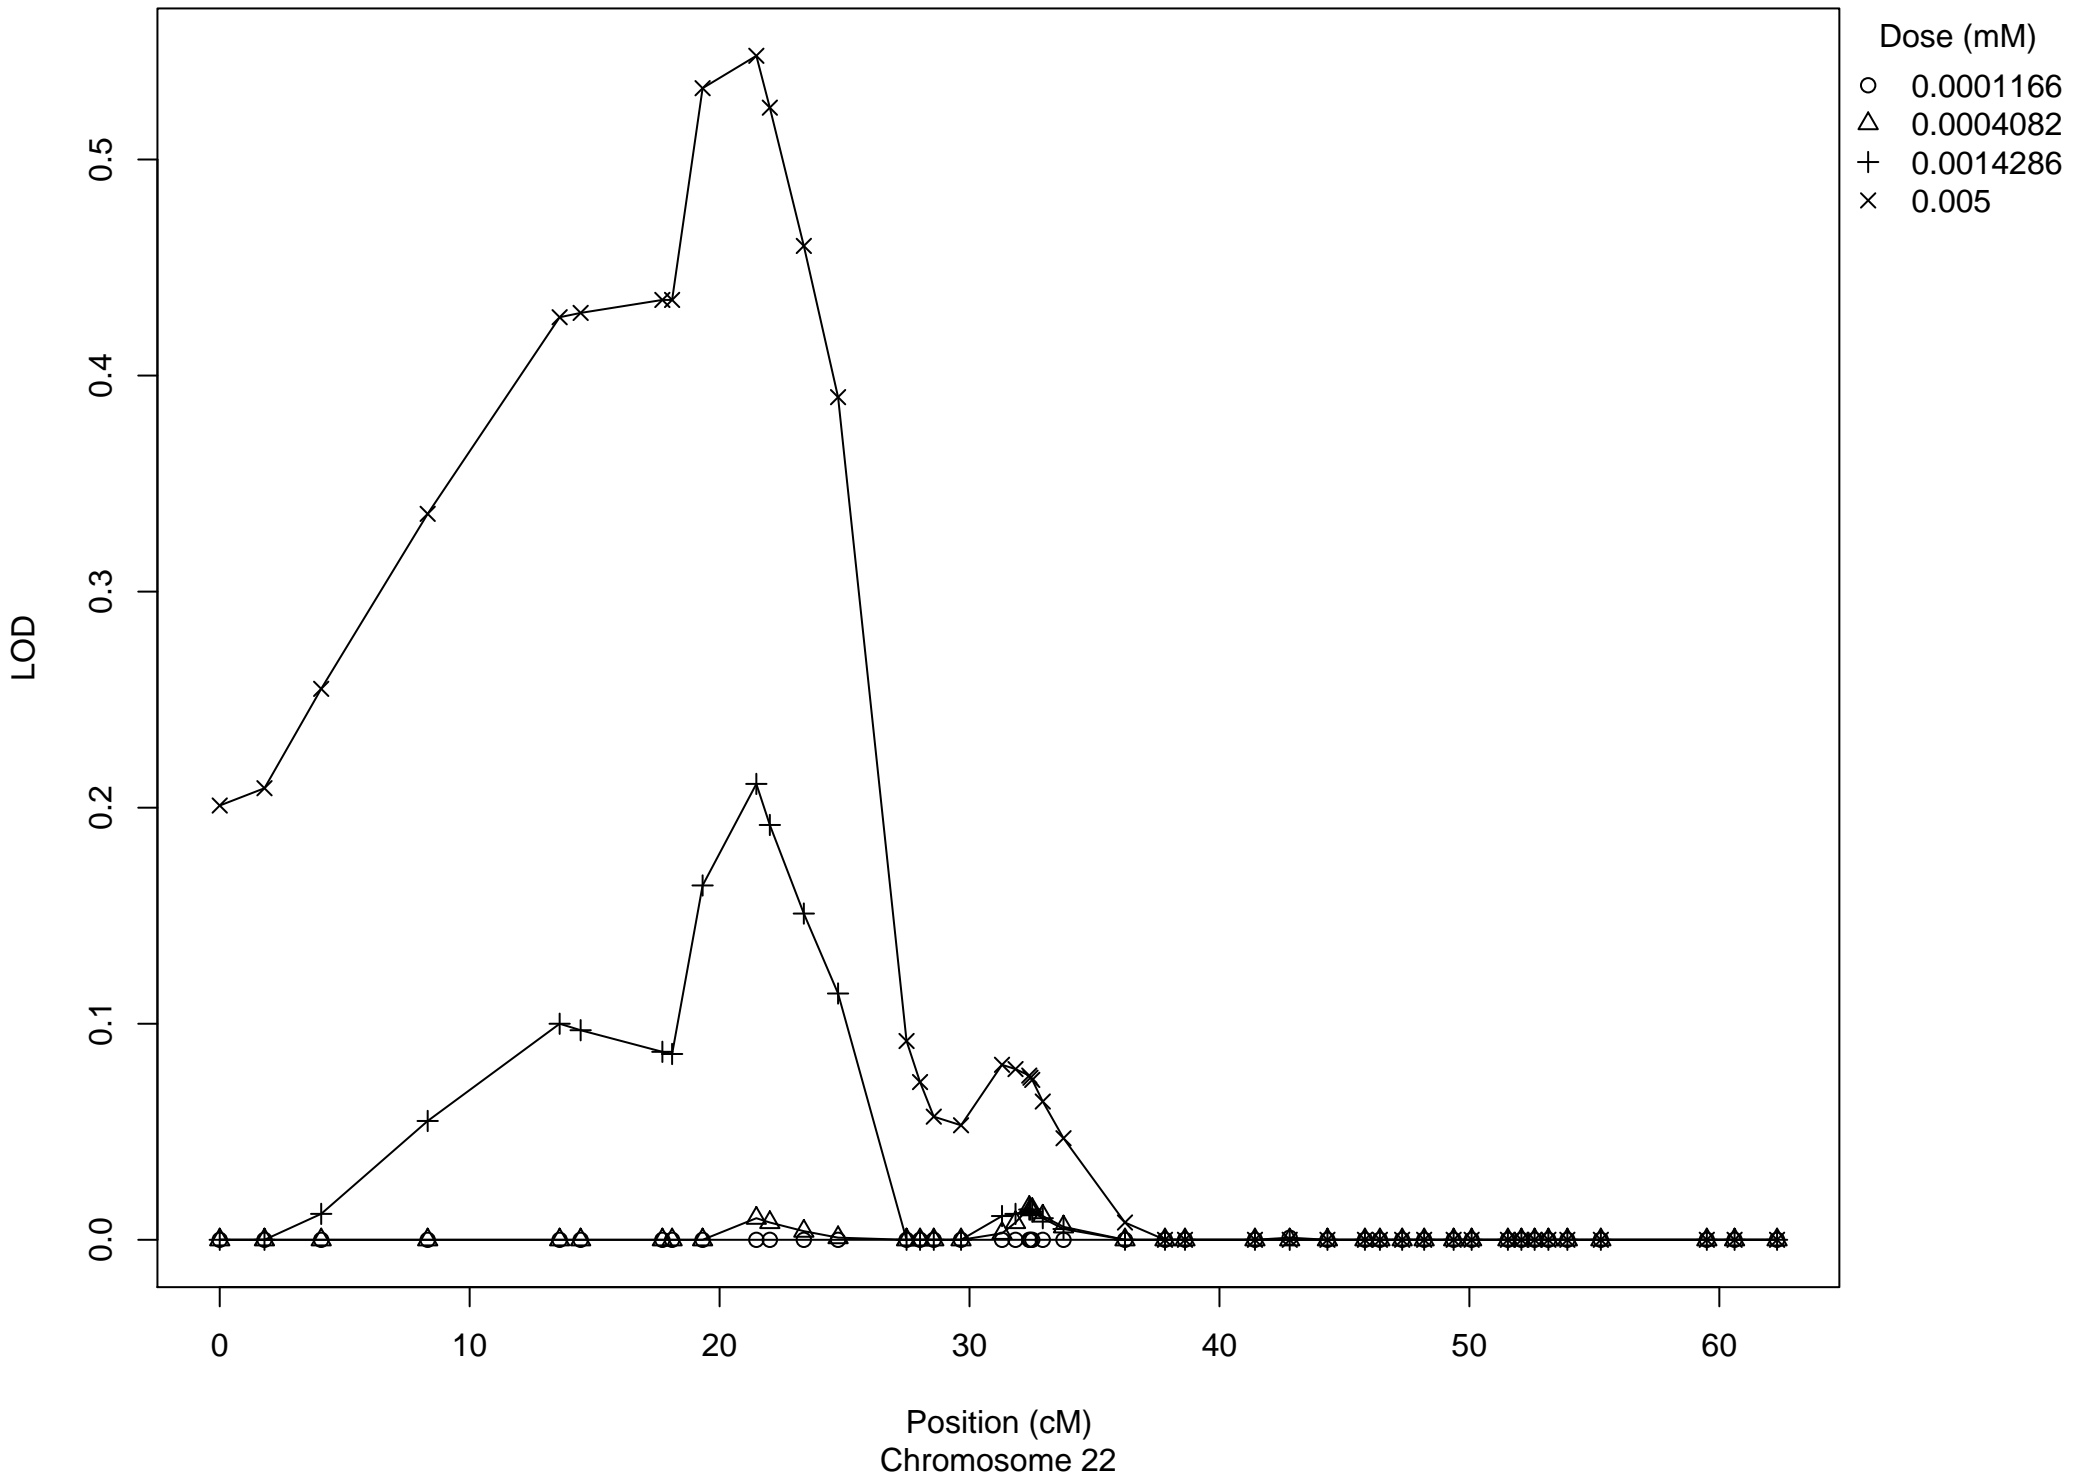

# Daunorubicin hydrochloride (Daun)

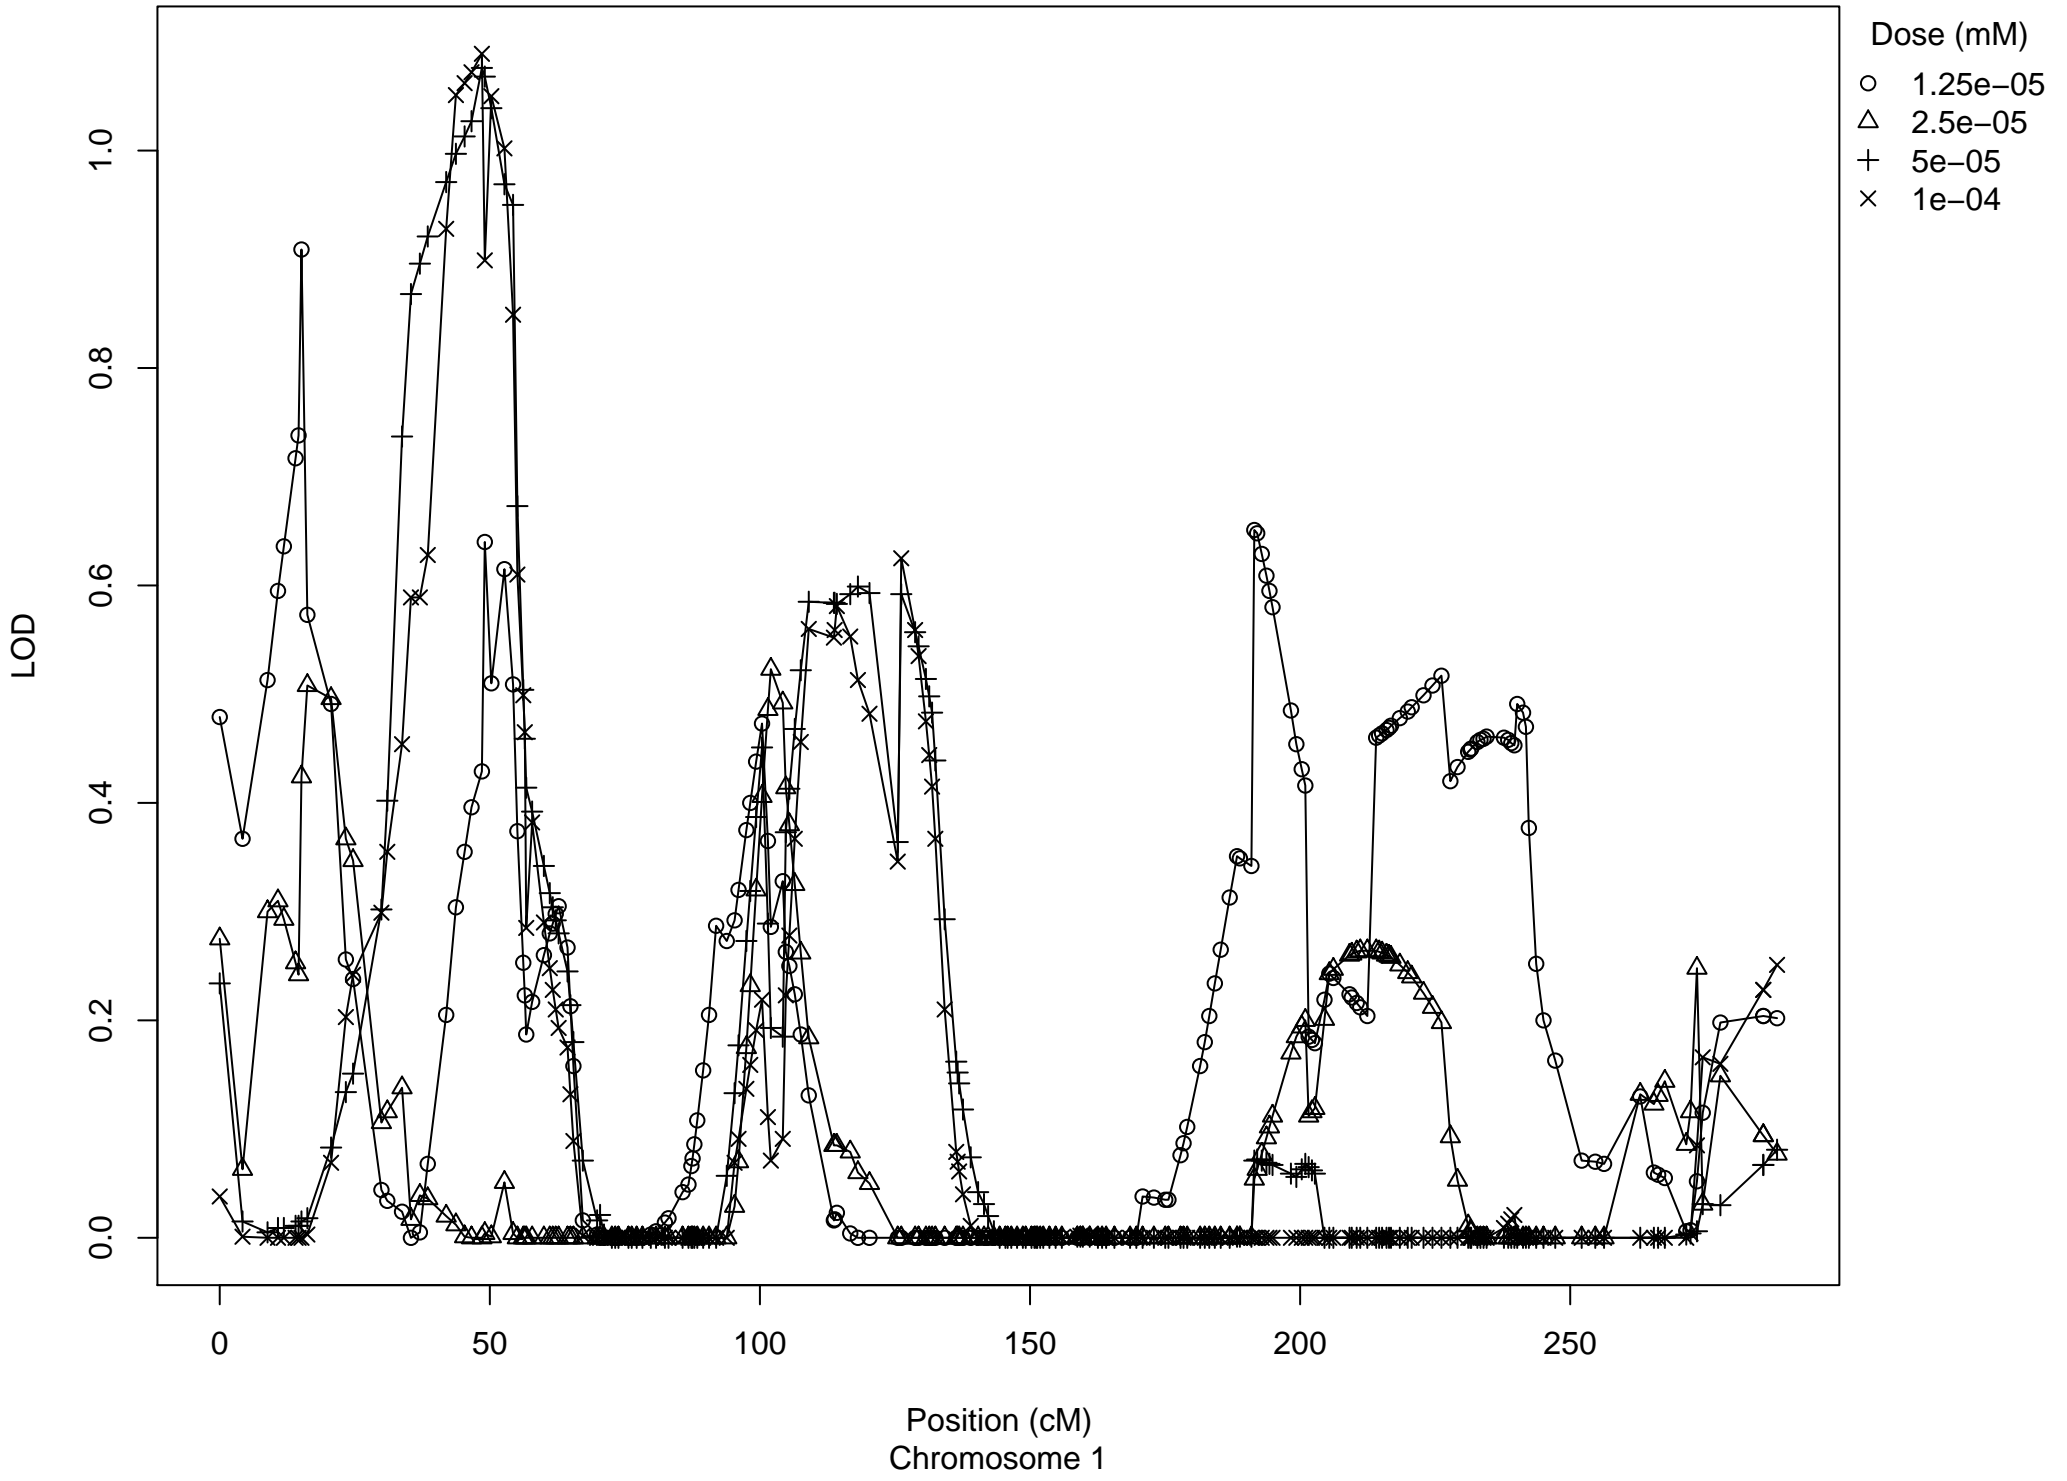

# Daunorubicin hydrochloride (Daun)

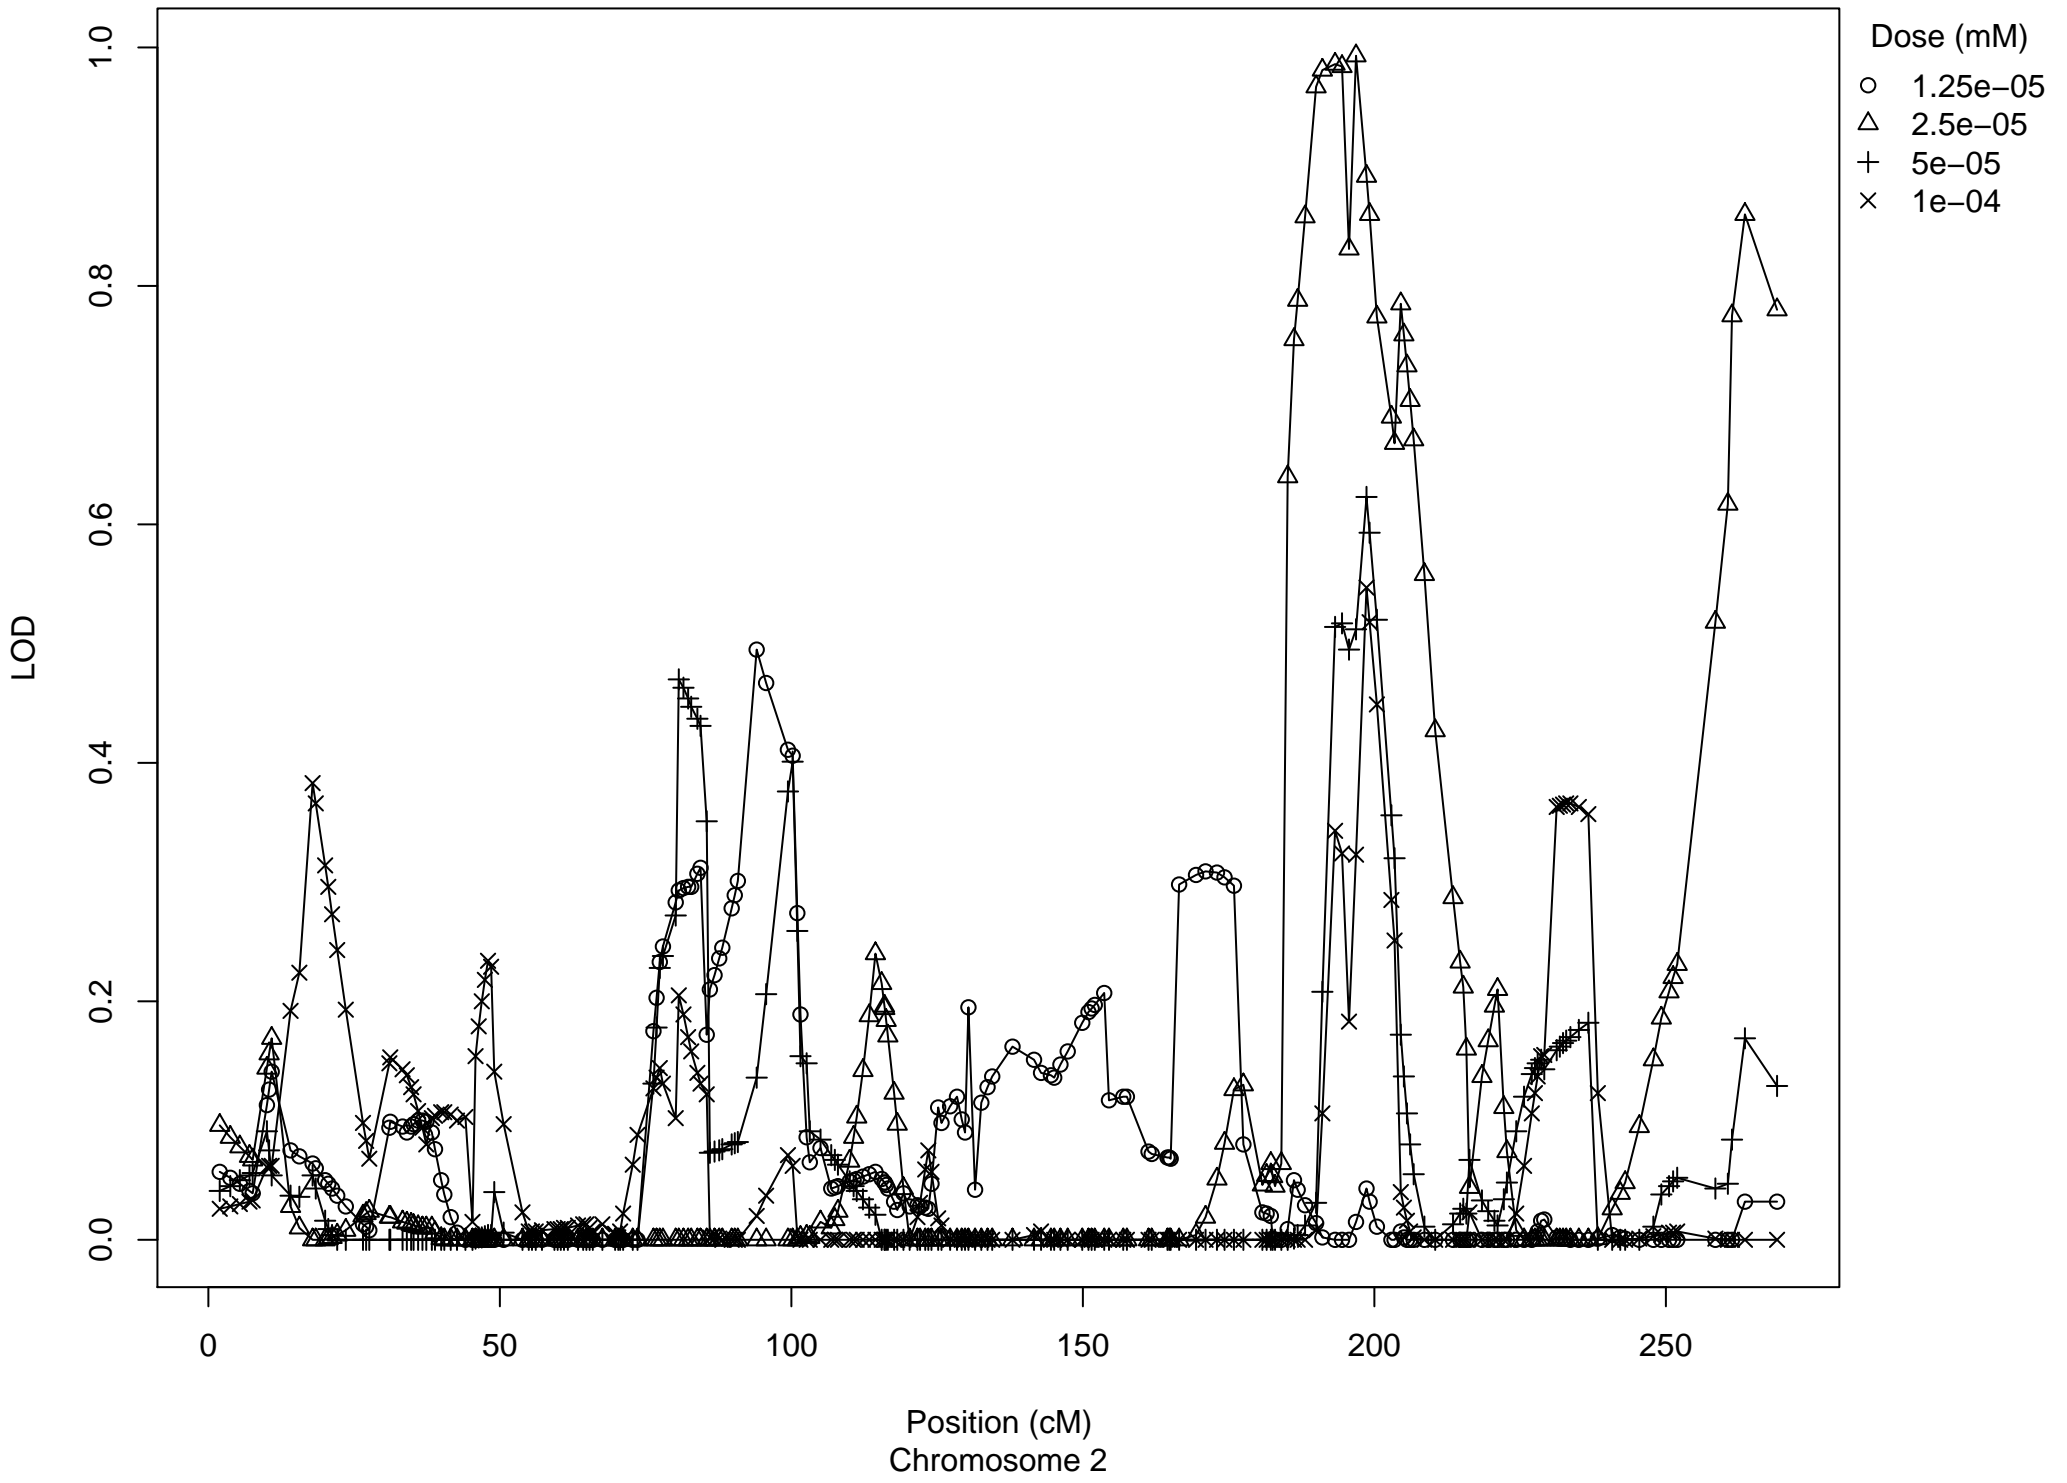

# Daunorubicin hydrochloride (Daun)

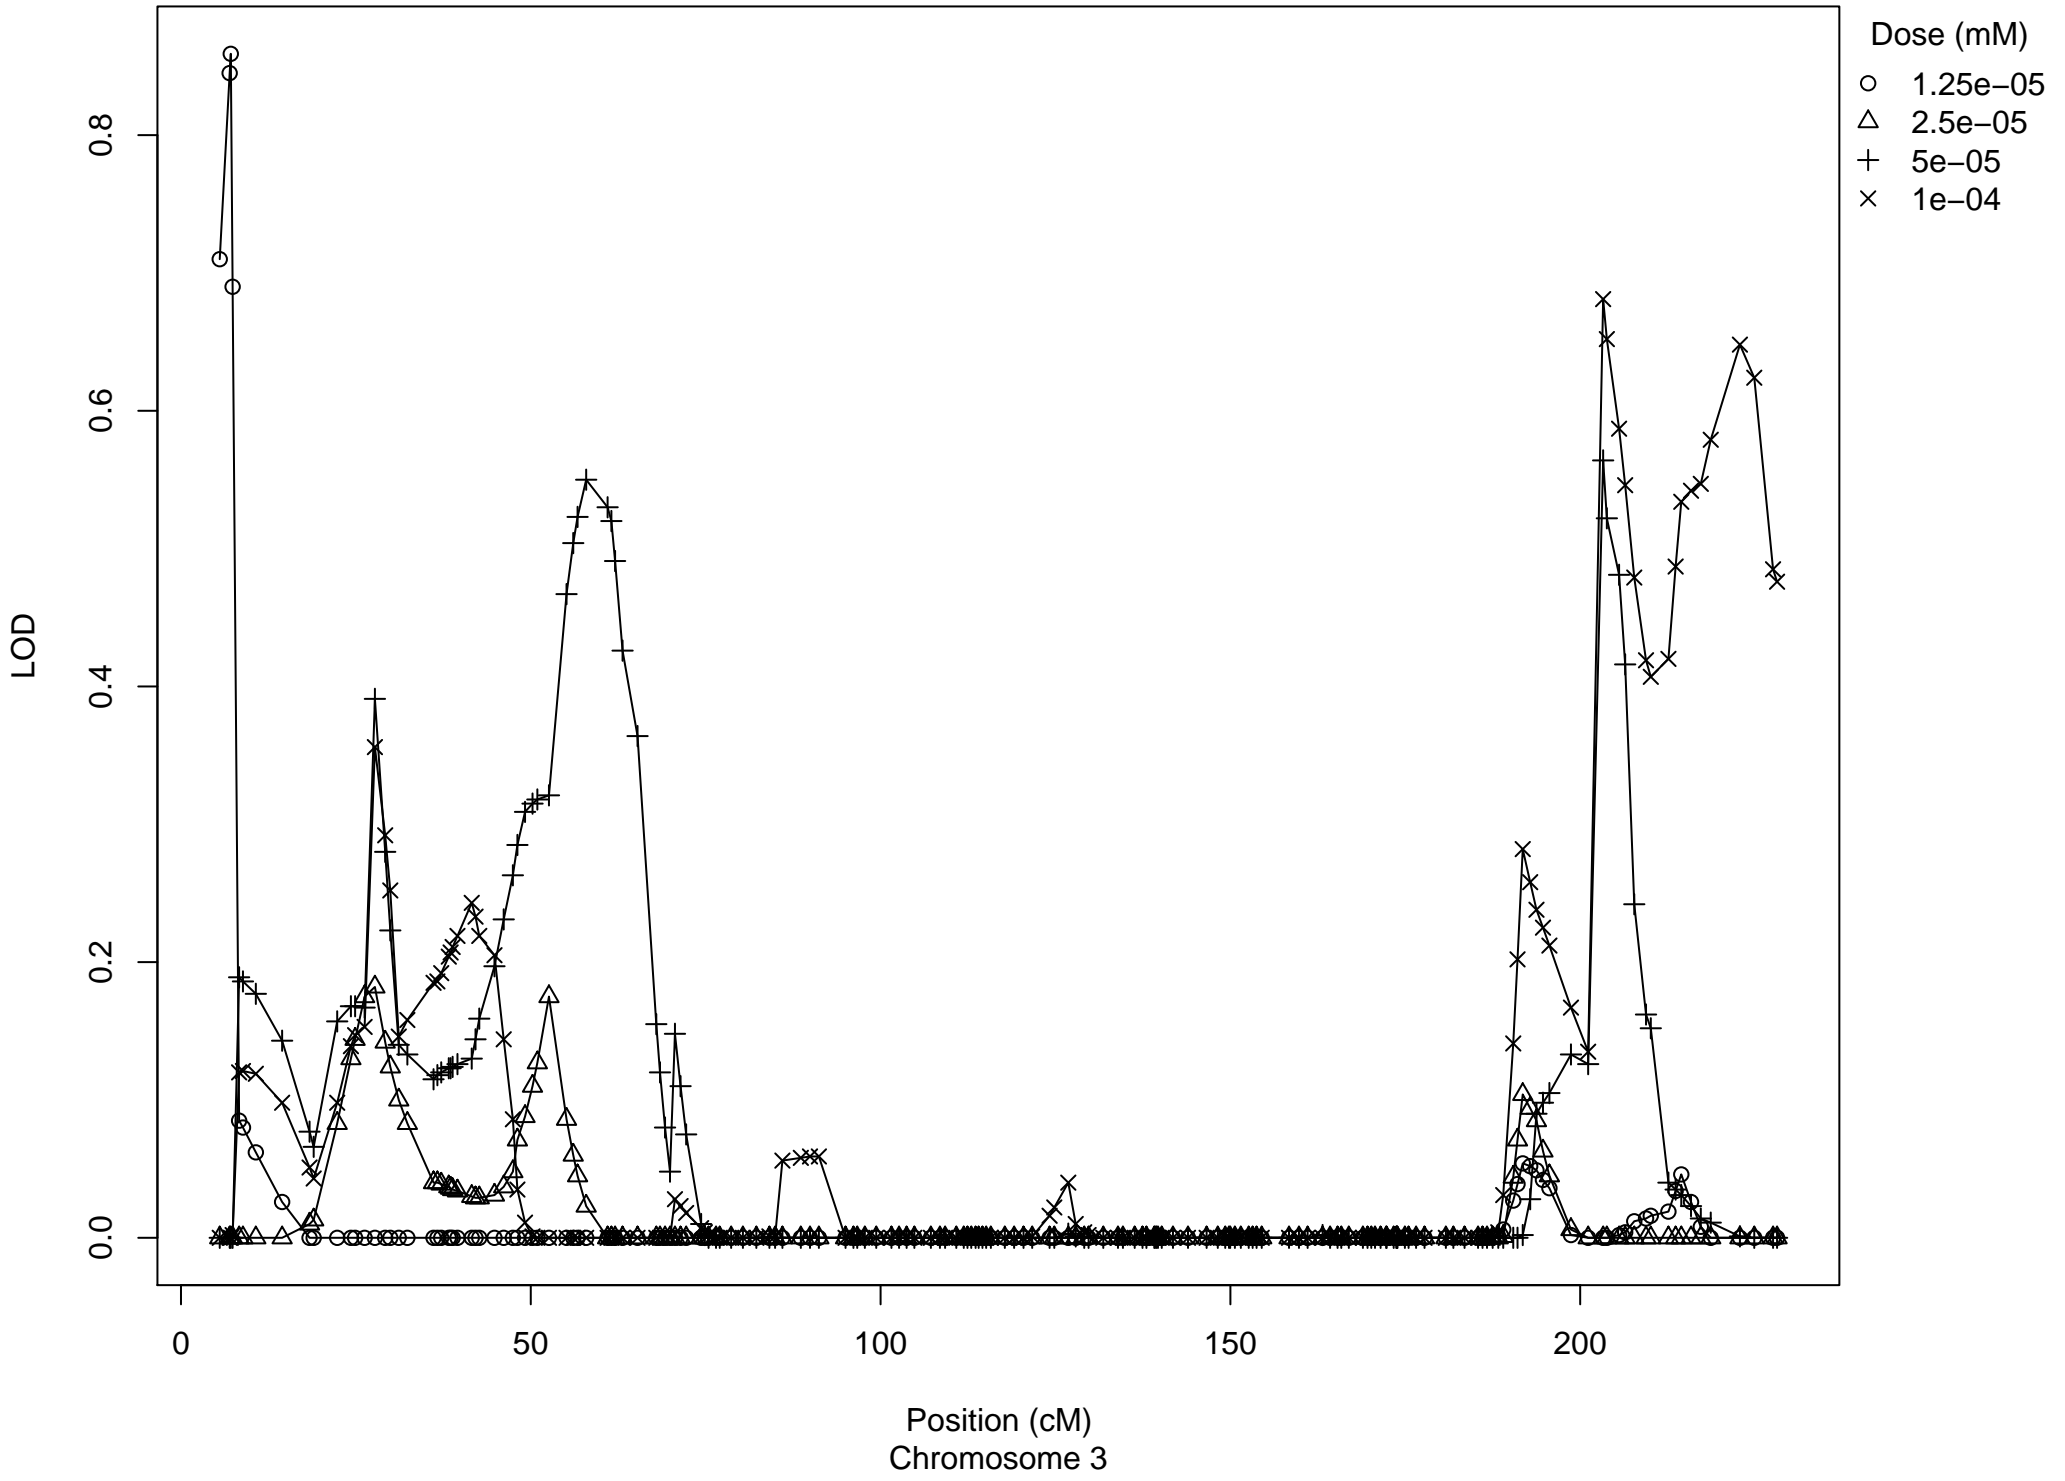

# Daunorubicin hydrochloride (Daun)

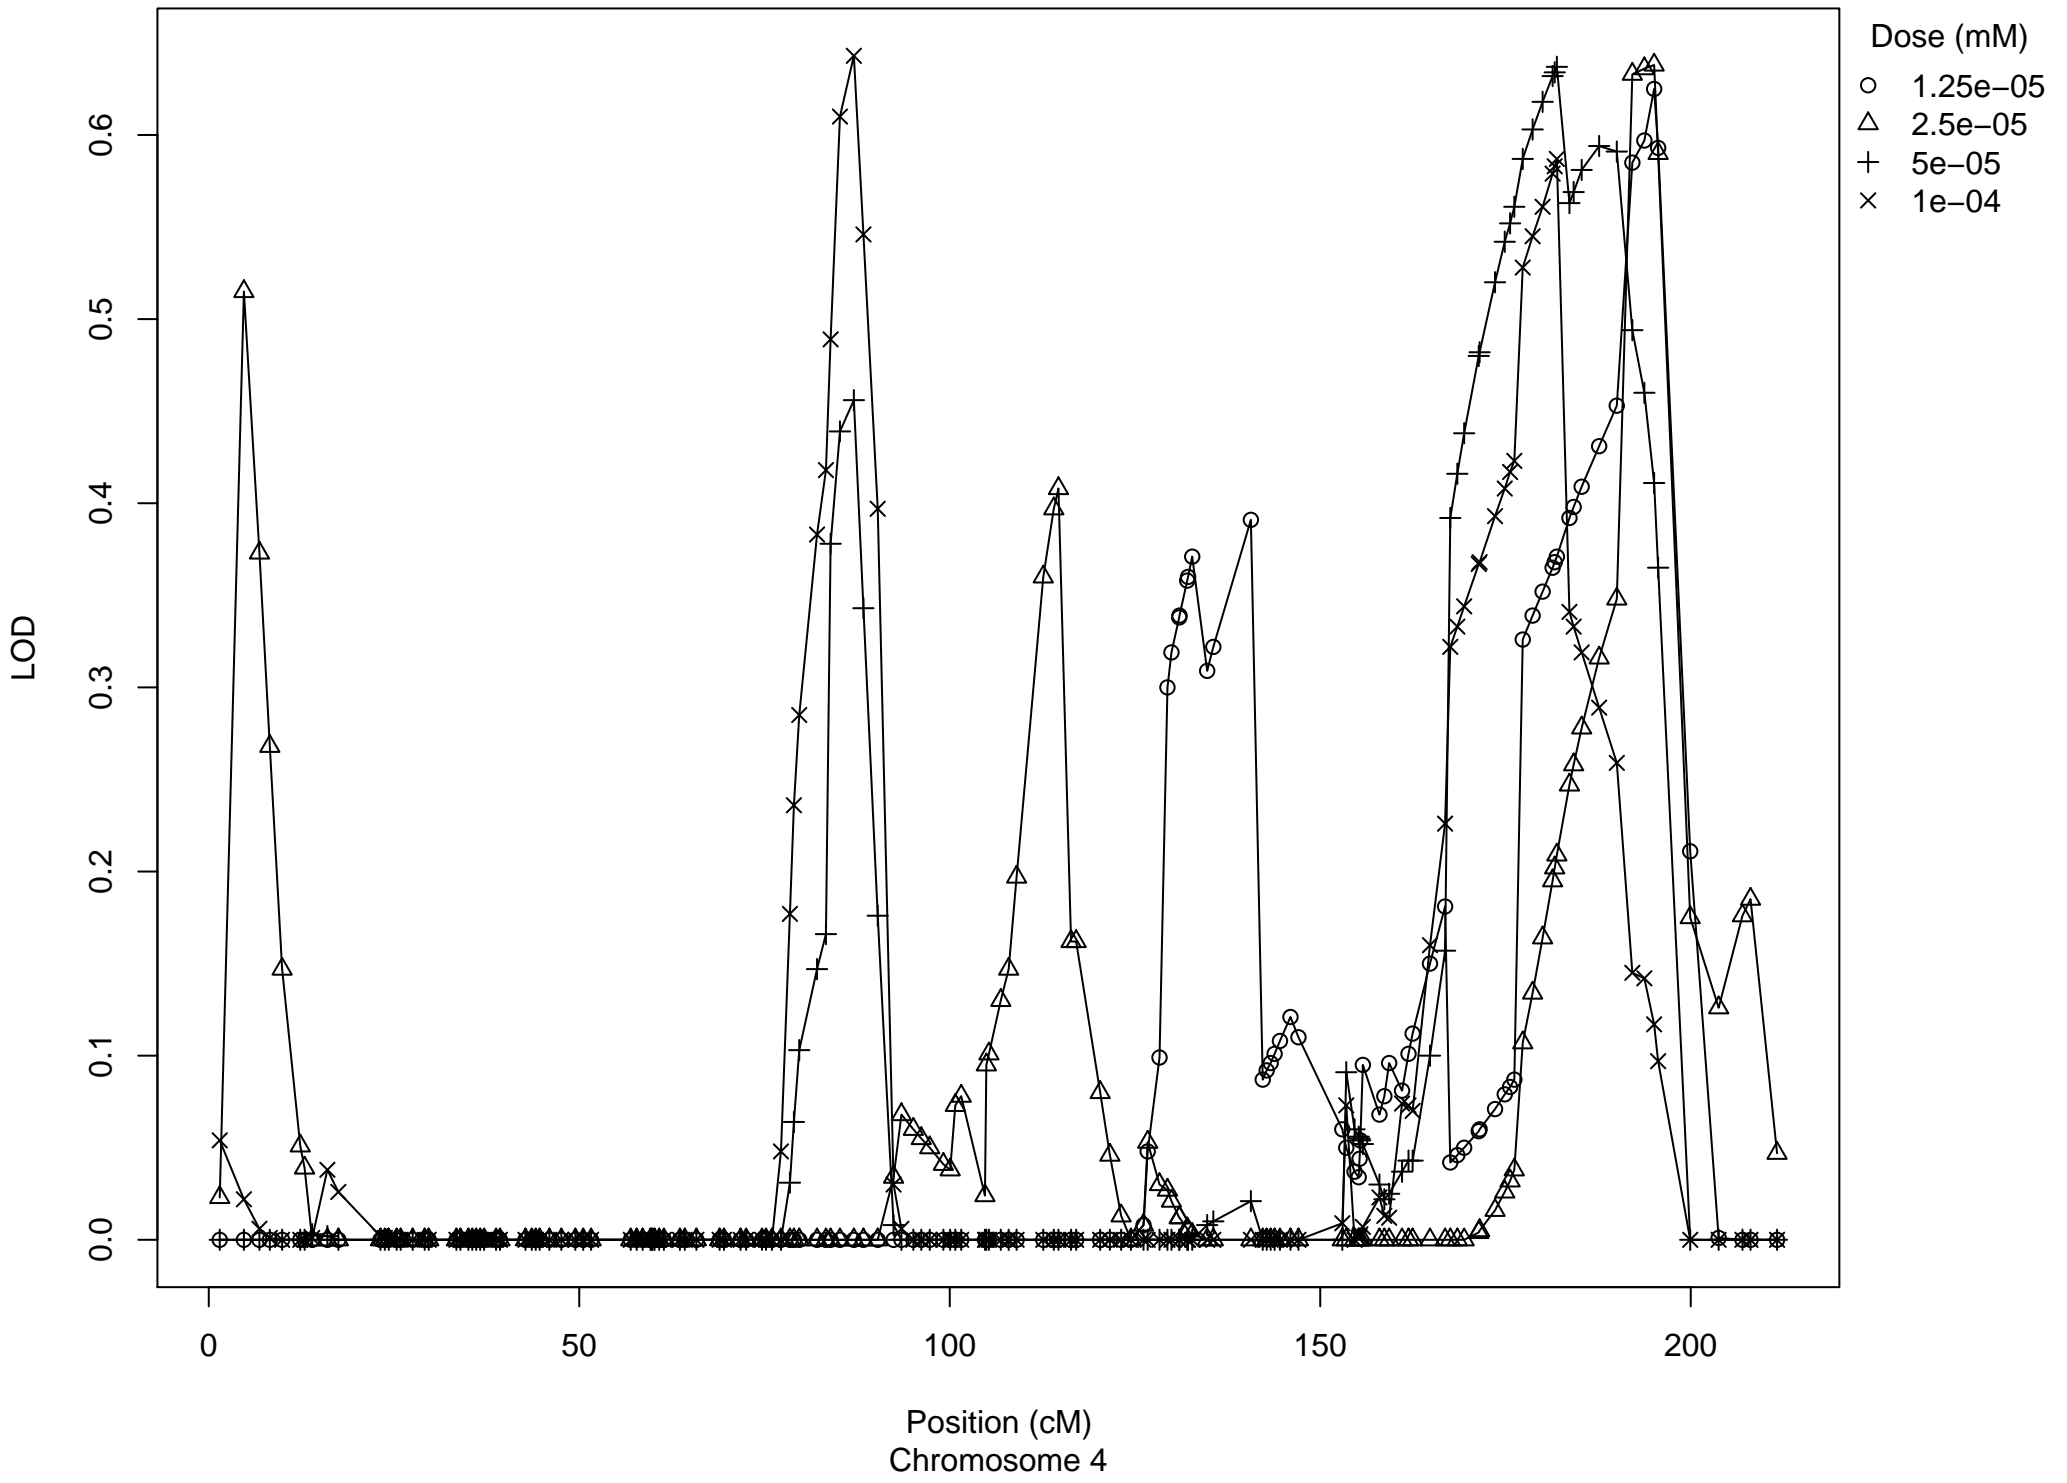



# Daunorubicin hydrochloride (Daun)

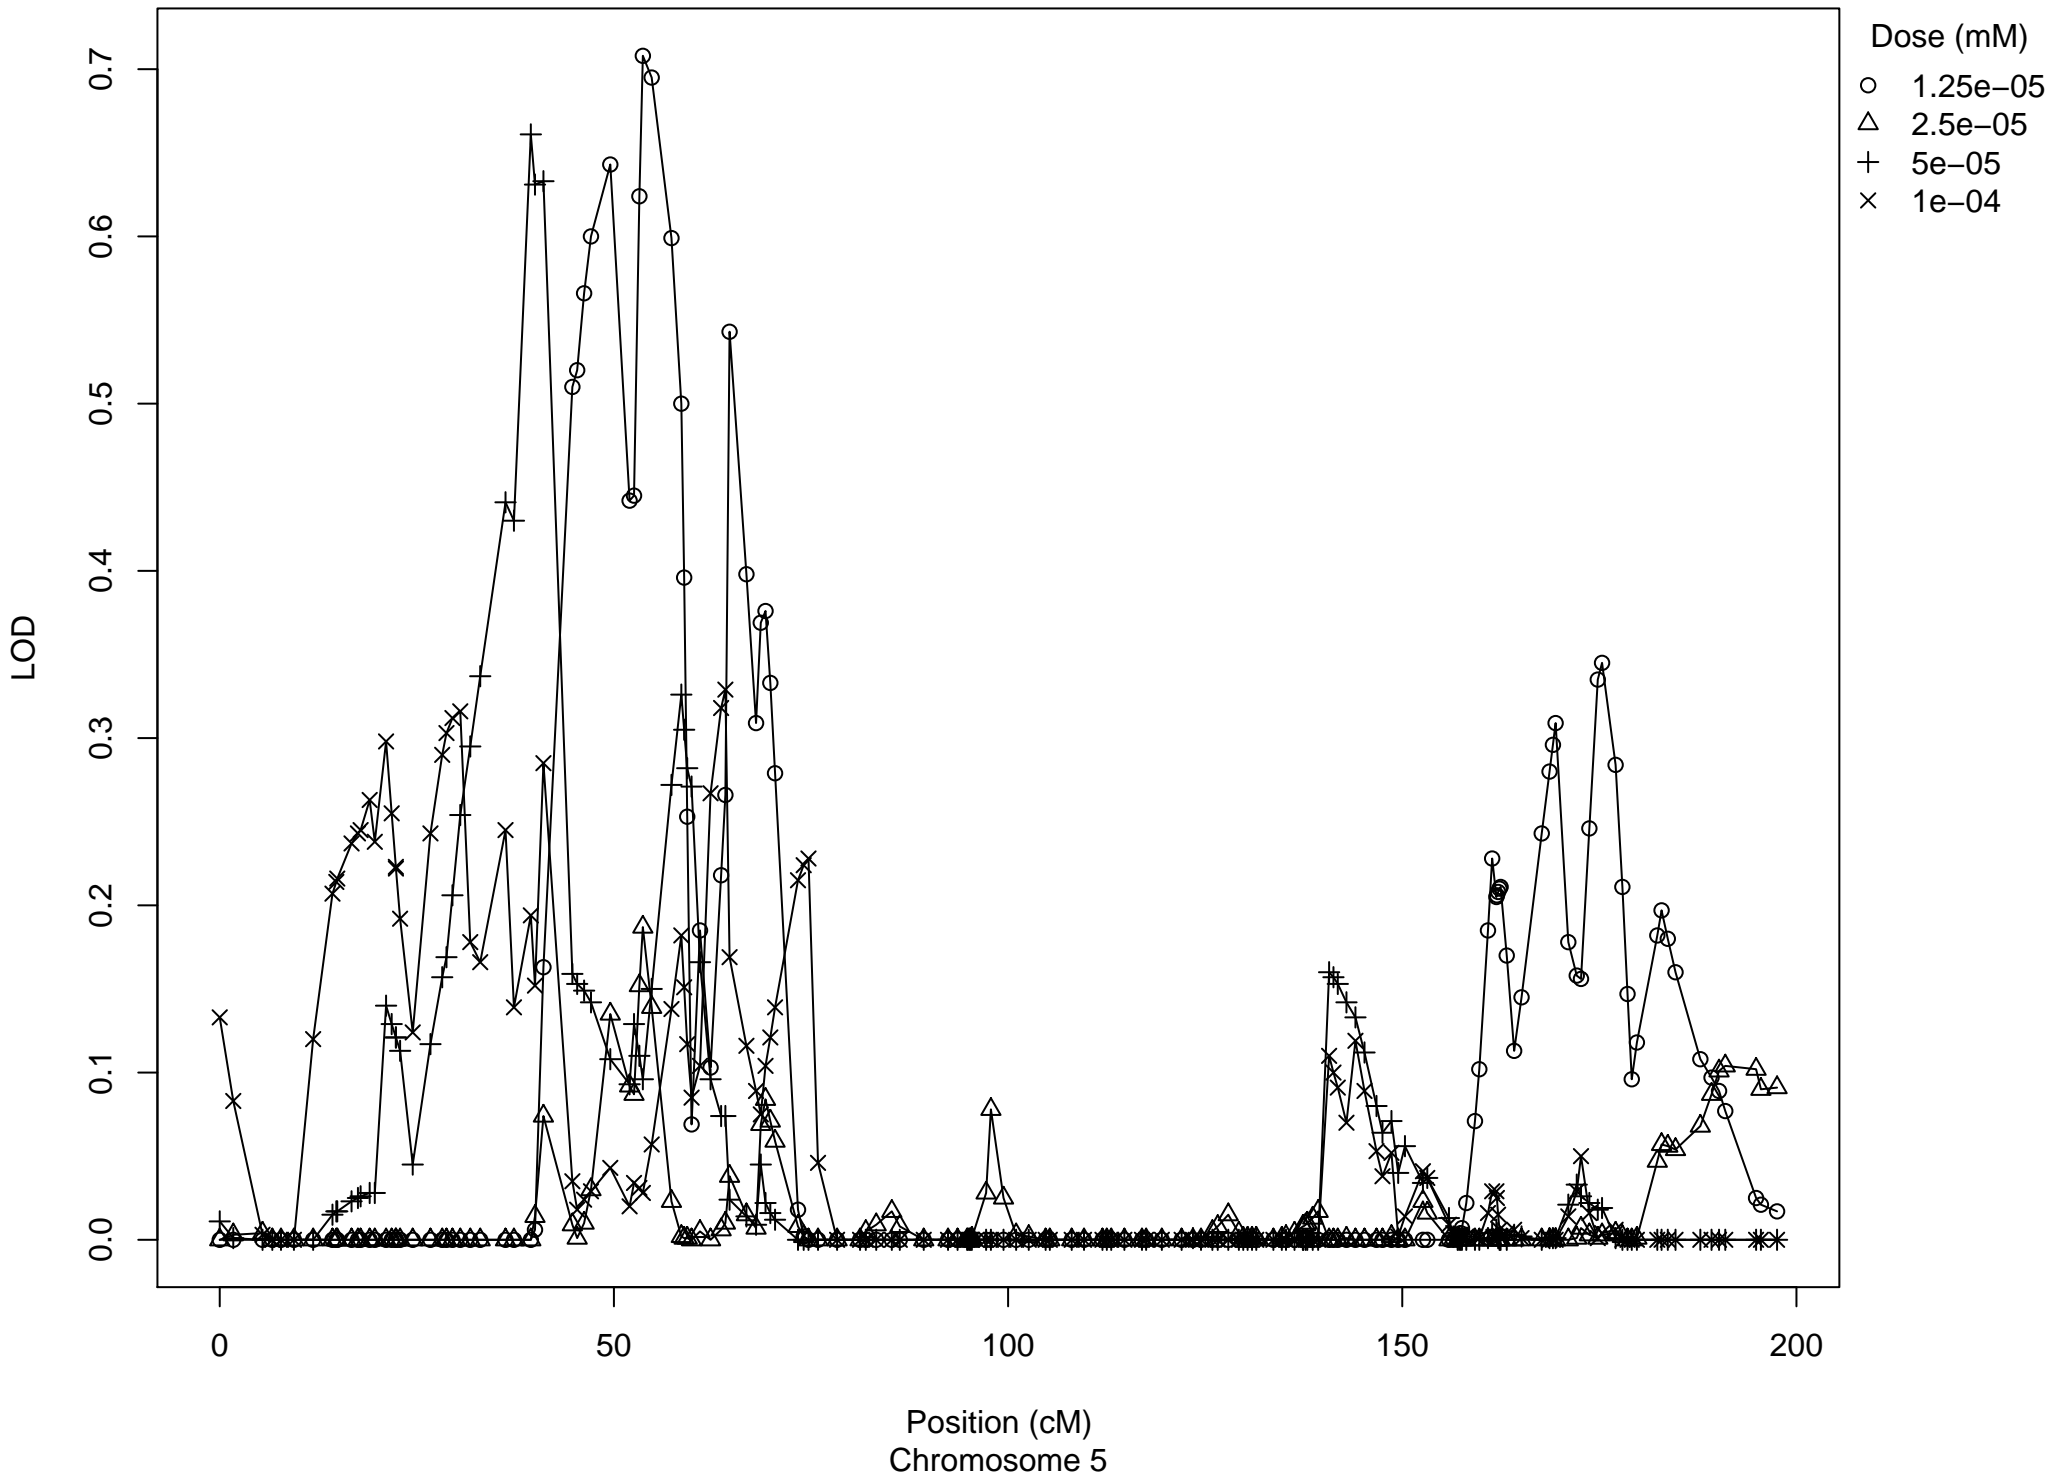

# Daunorubicin hydrochloride (Daun)

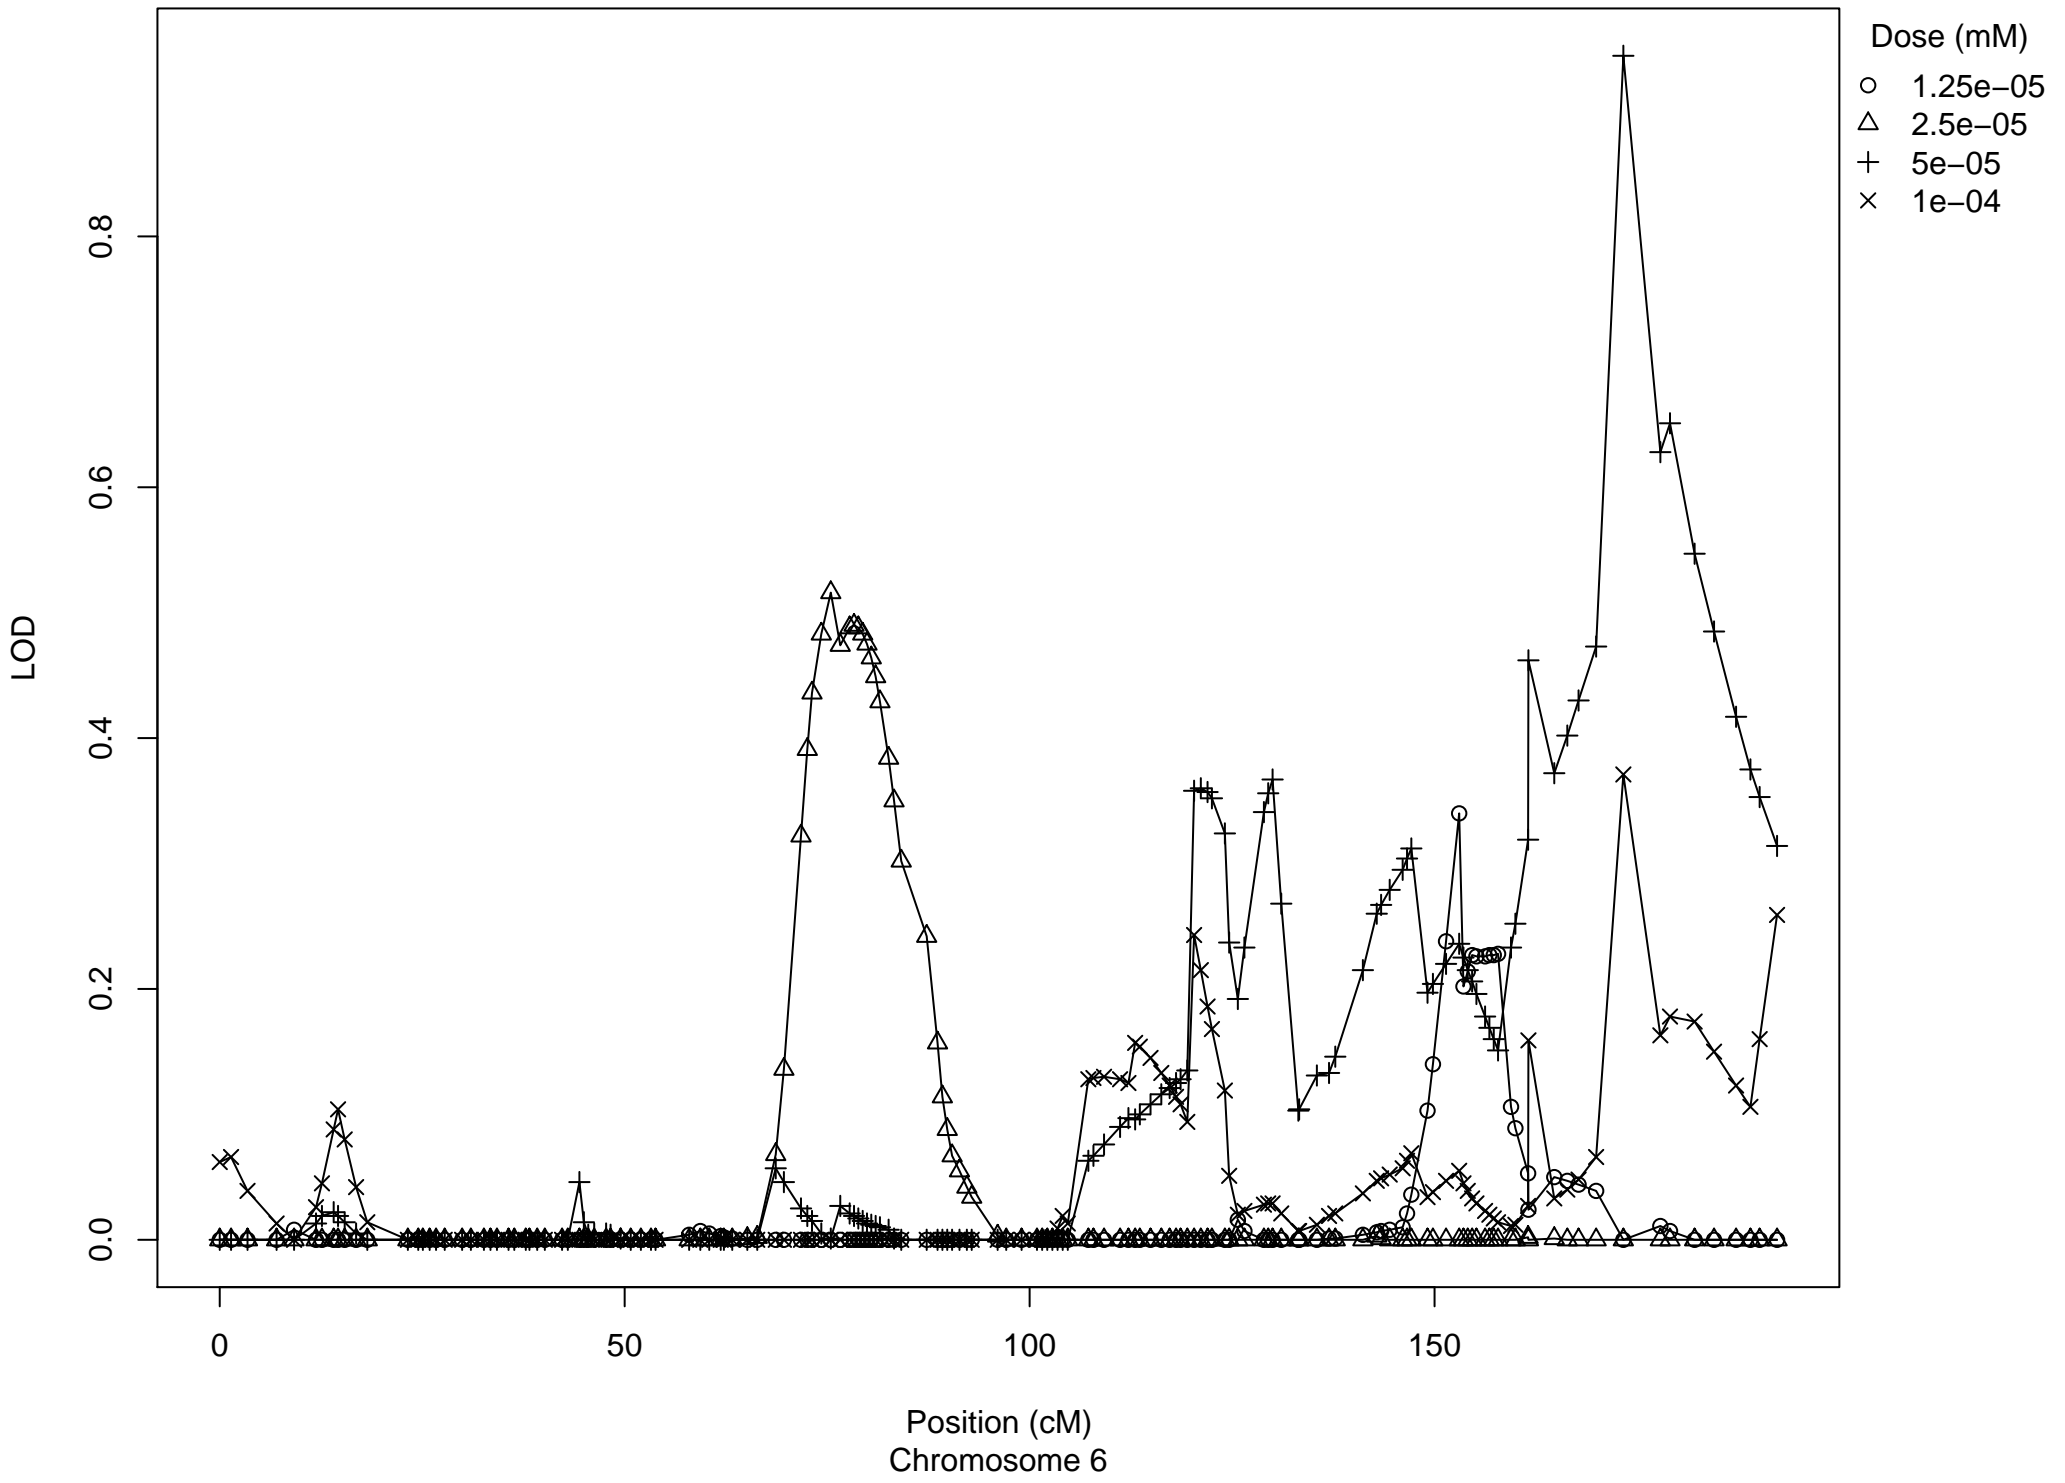

# Daunorubicin hydrochloride (Daun)

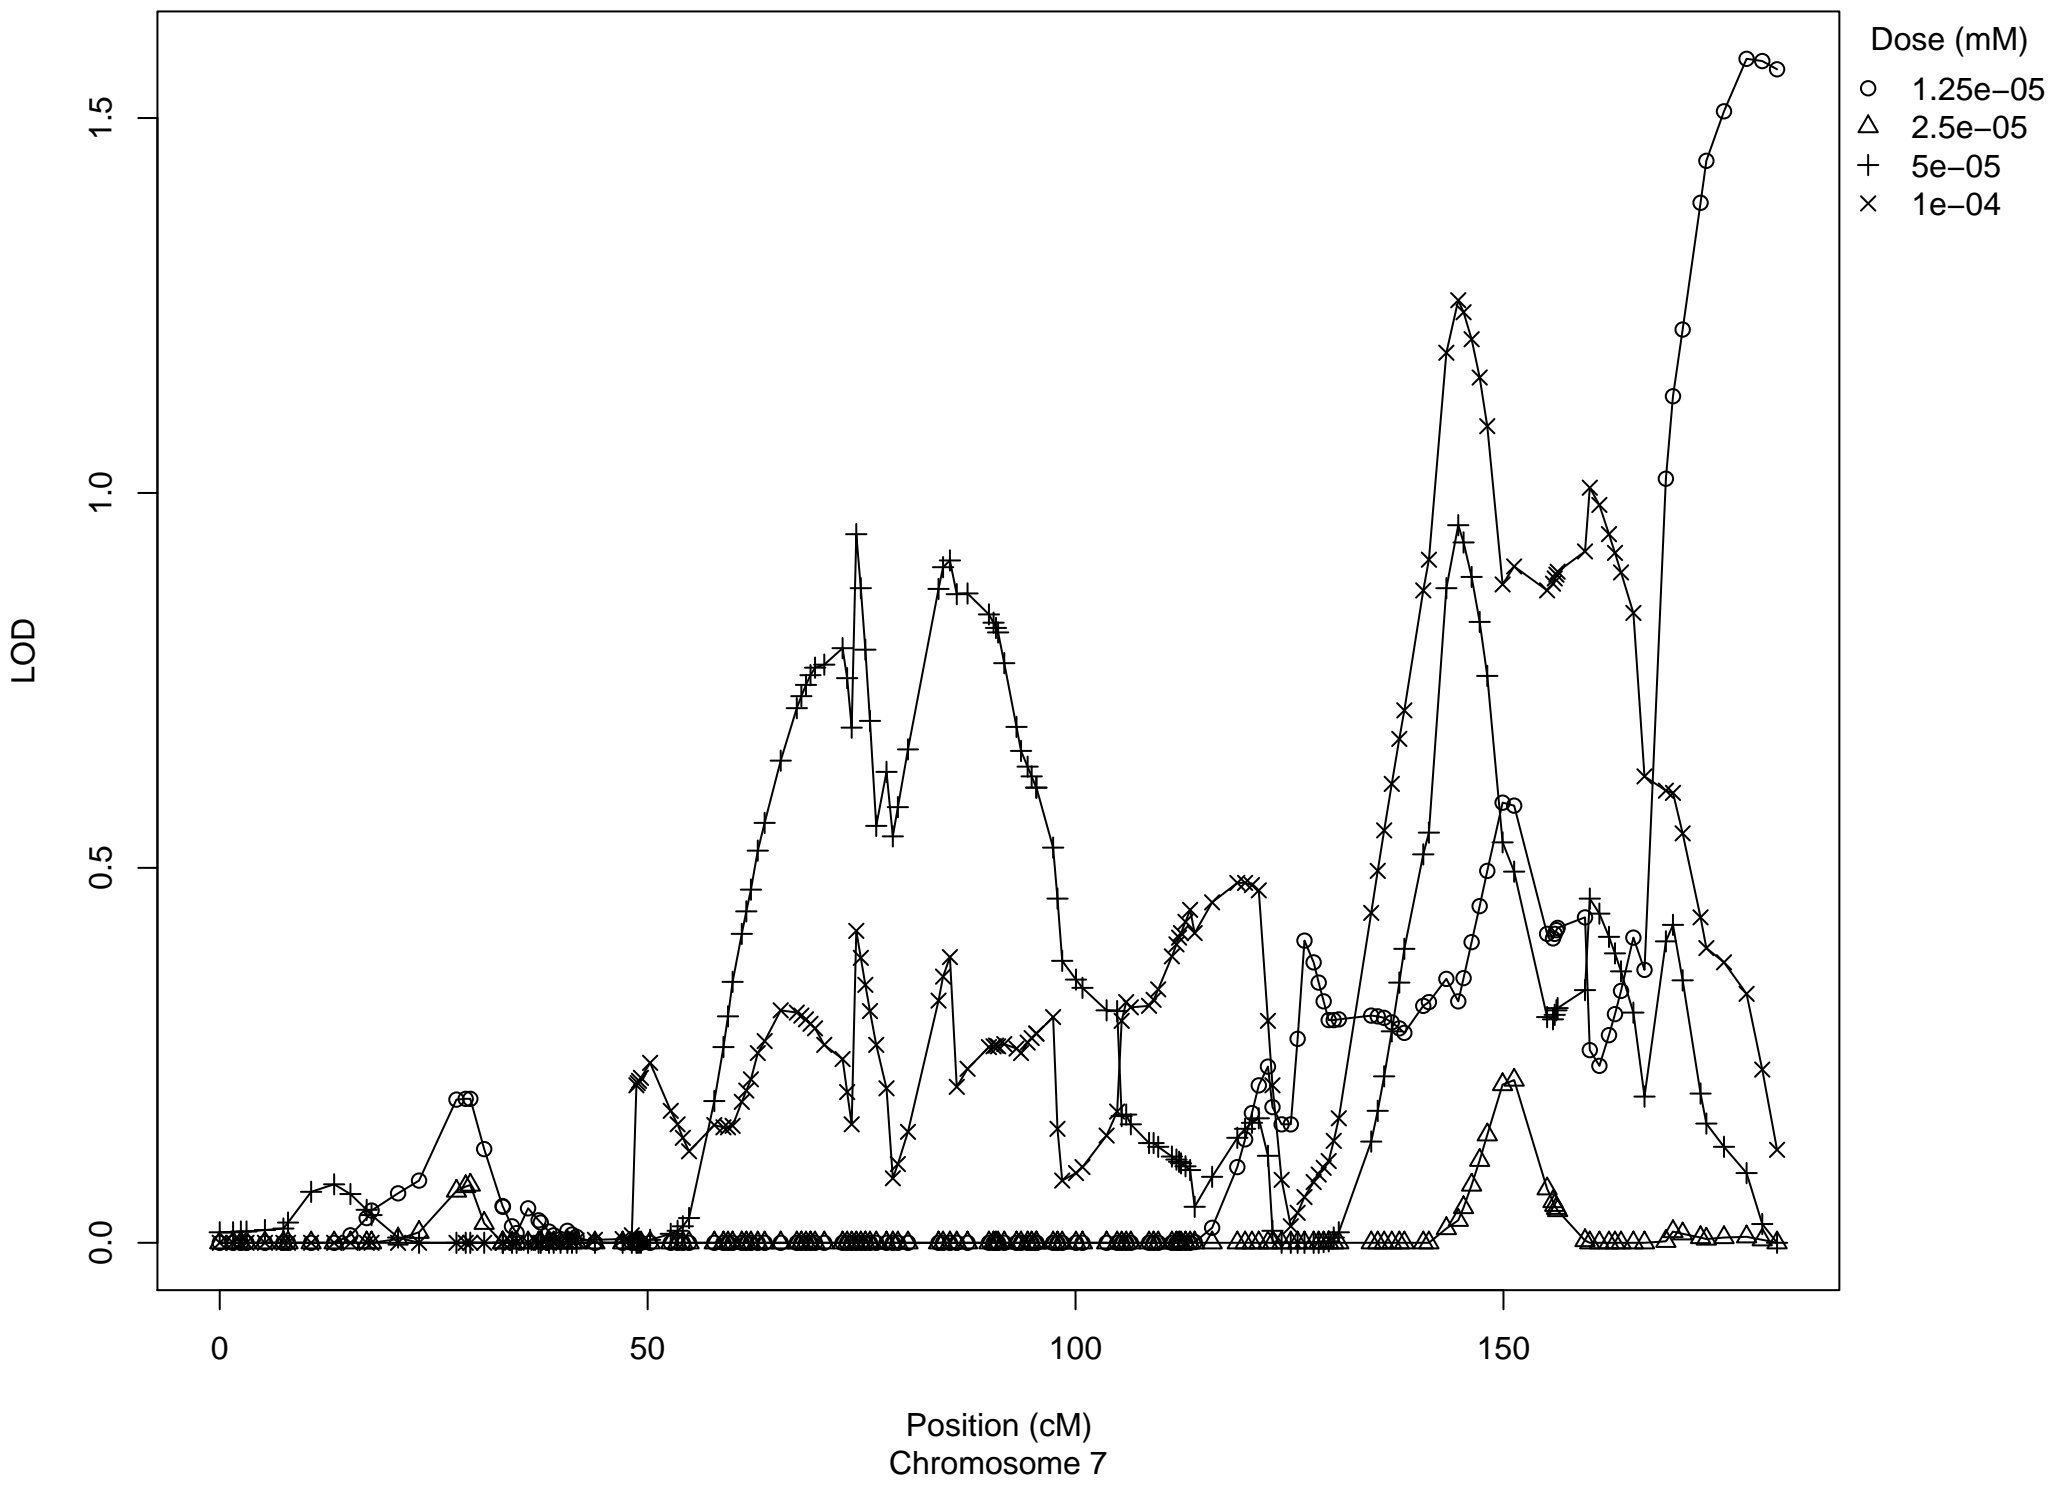

# Daunorubicin hydrochloride (Daun)

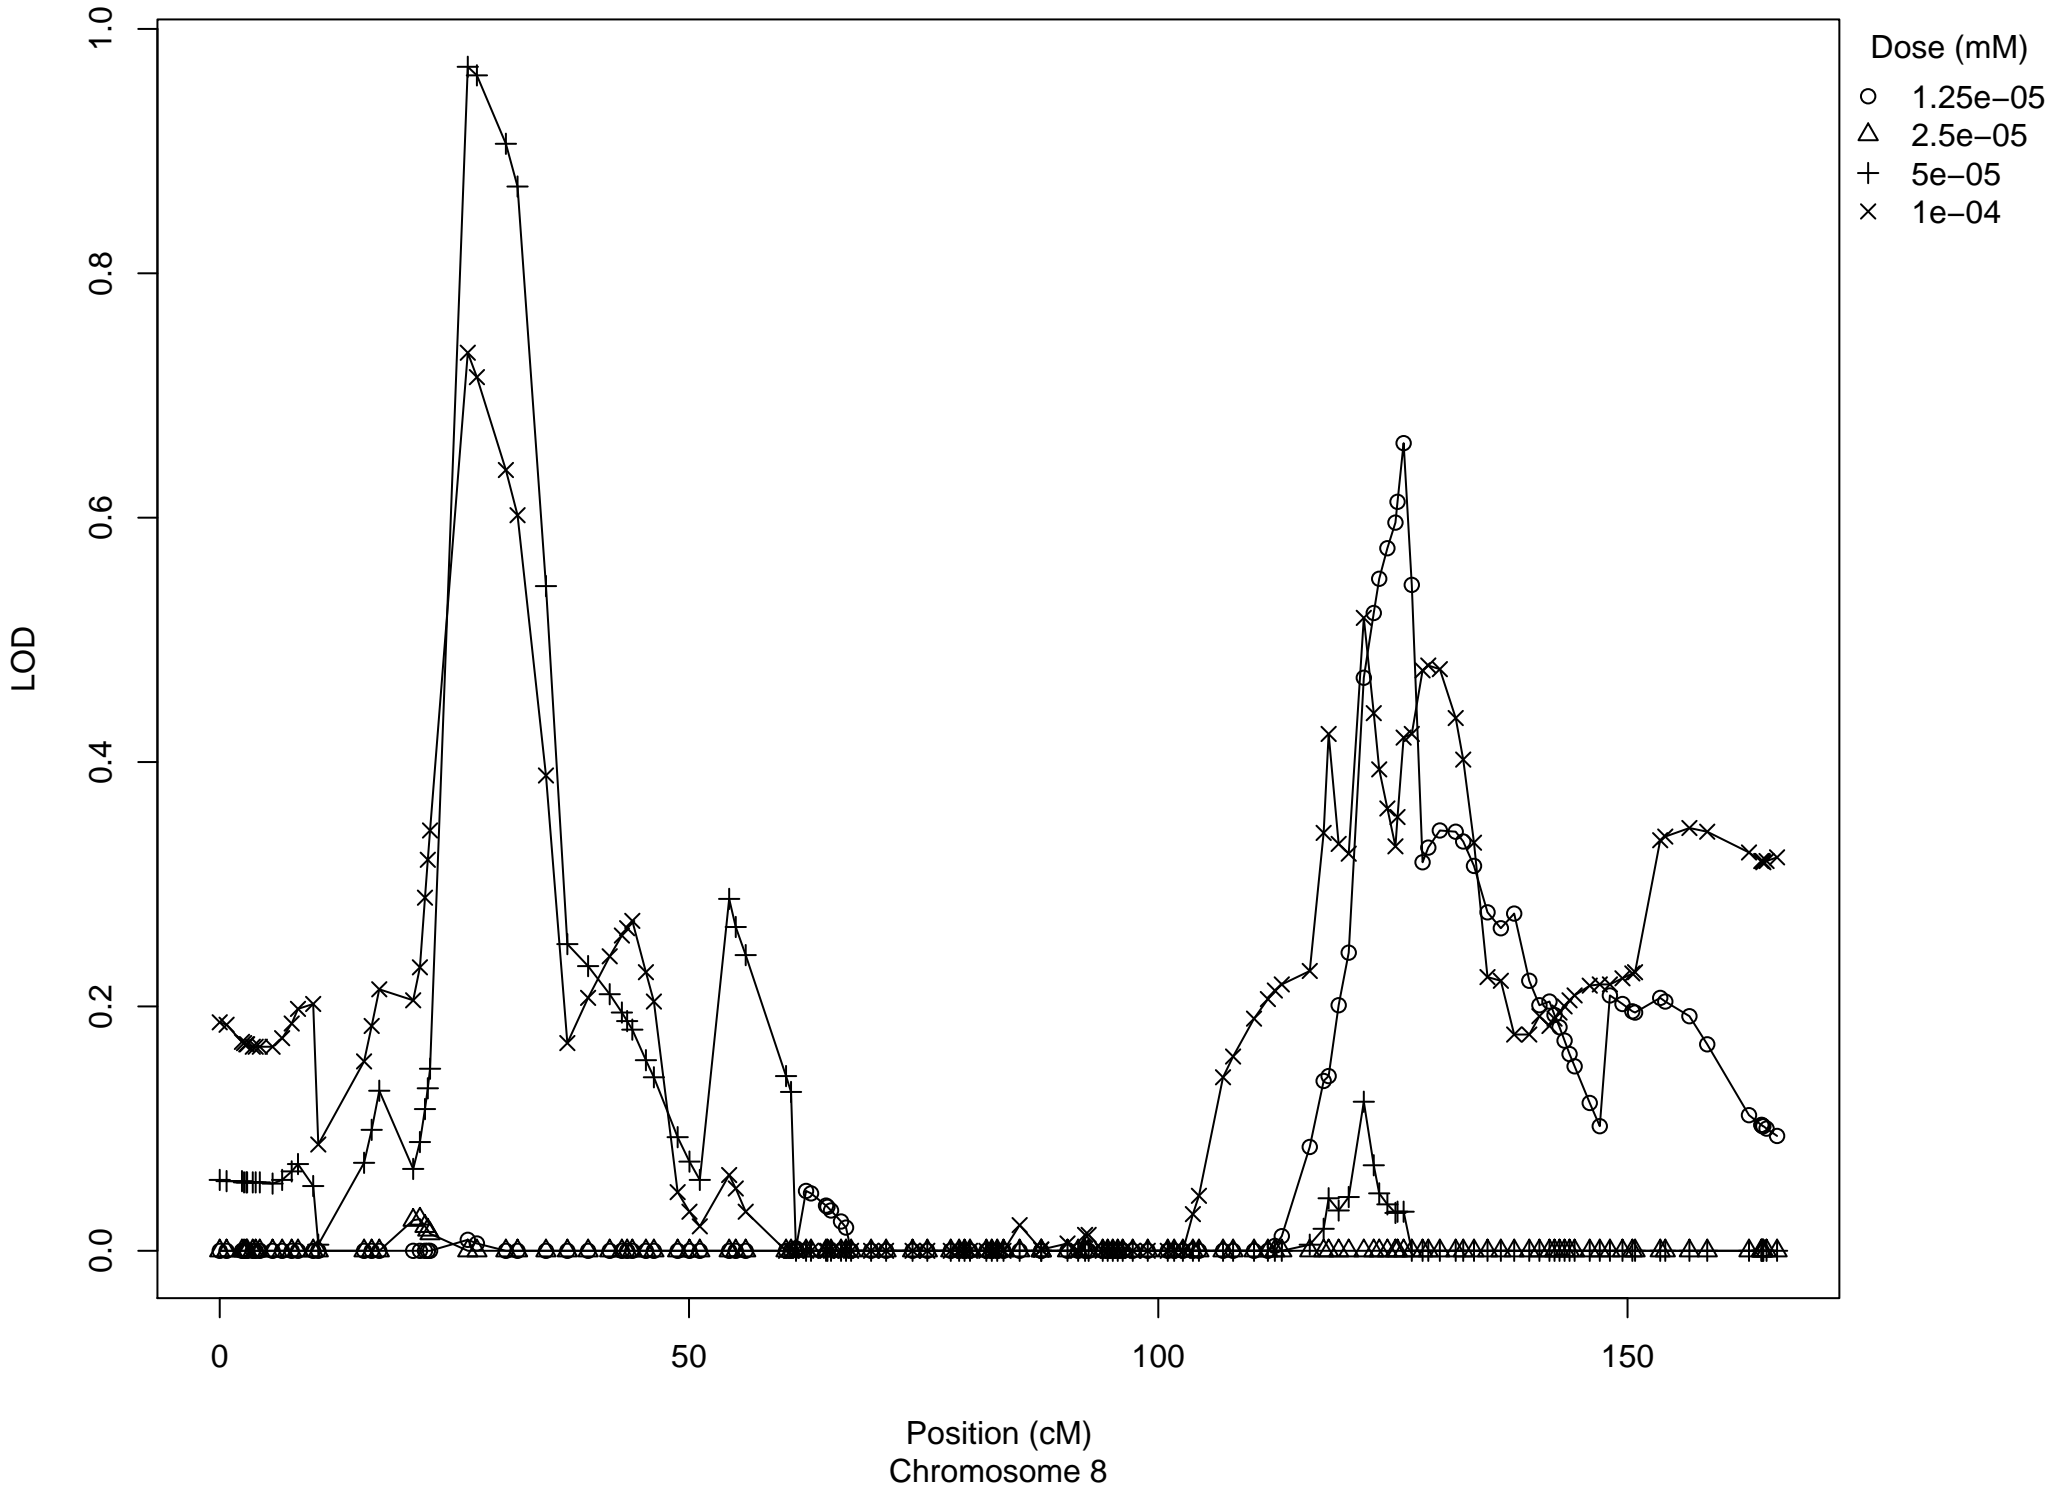

# Daunorubicin hydrochloride (Daun)

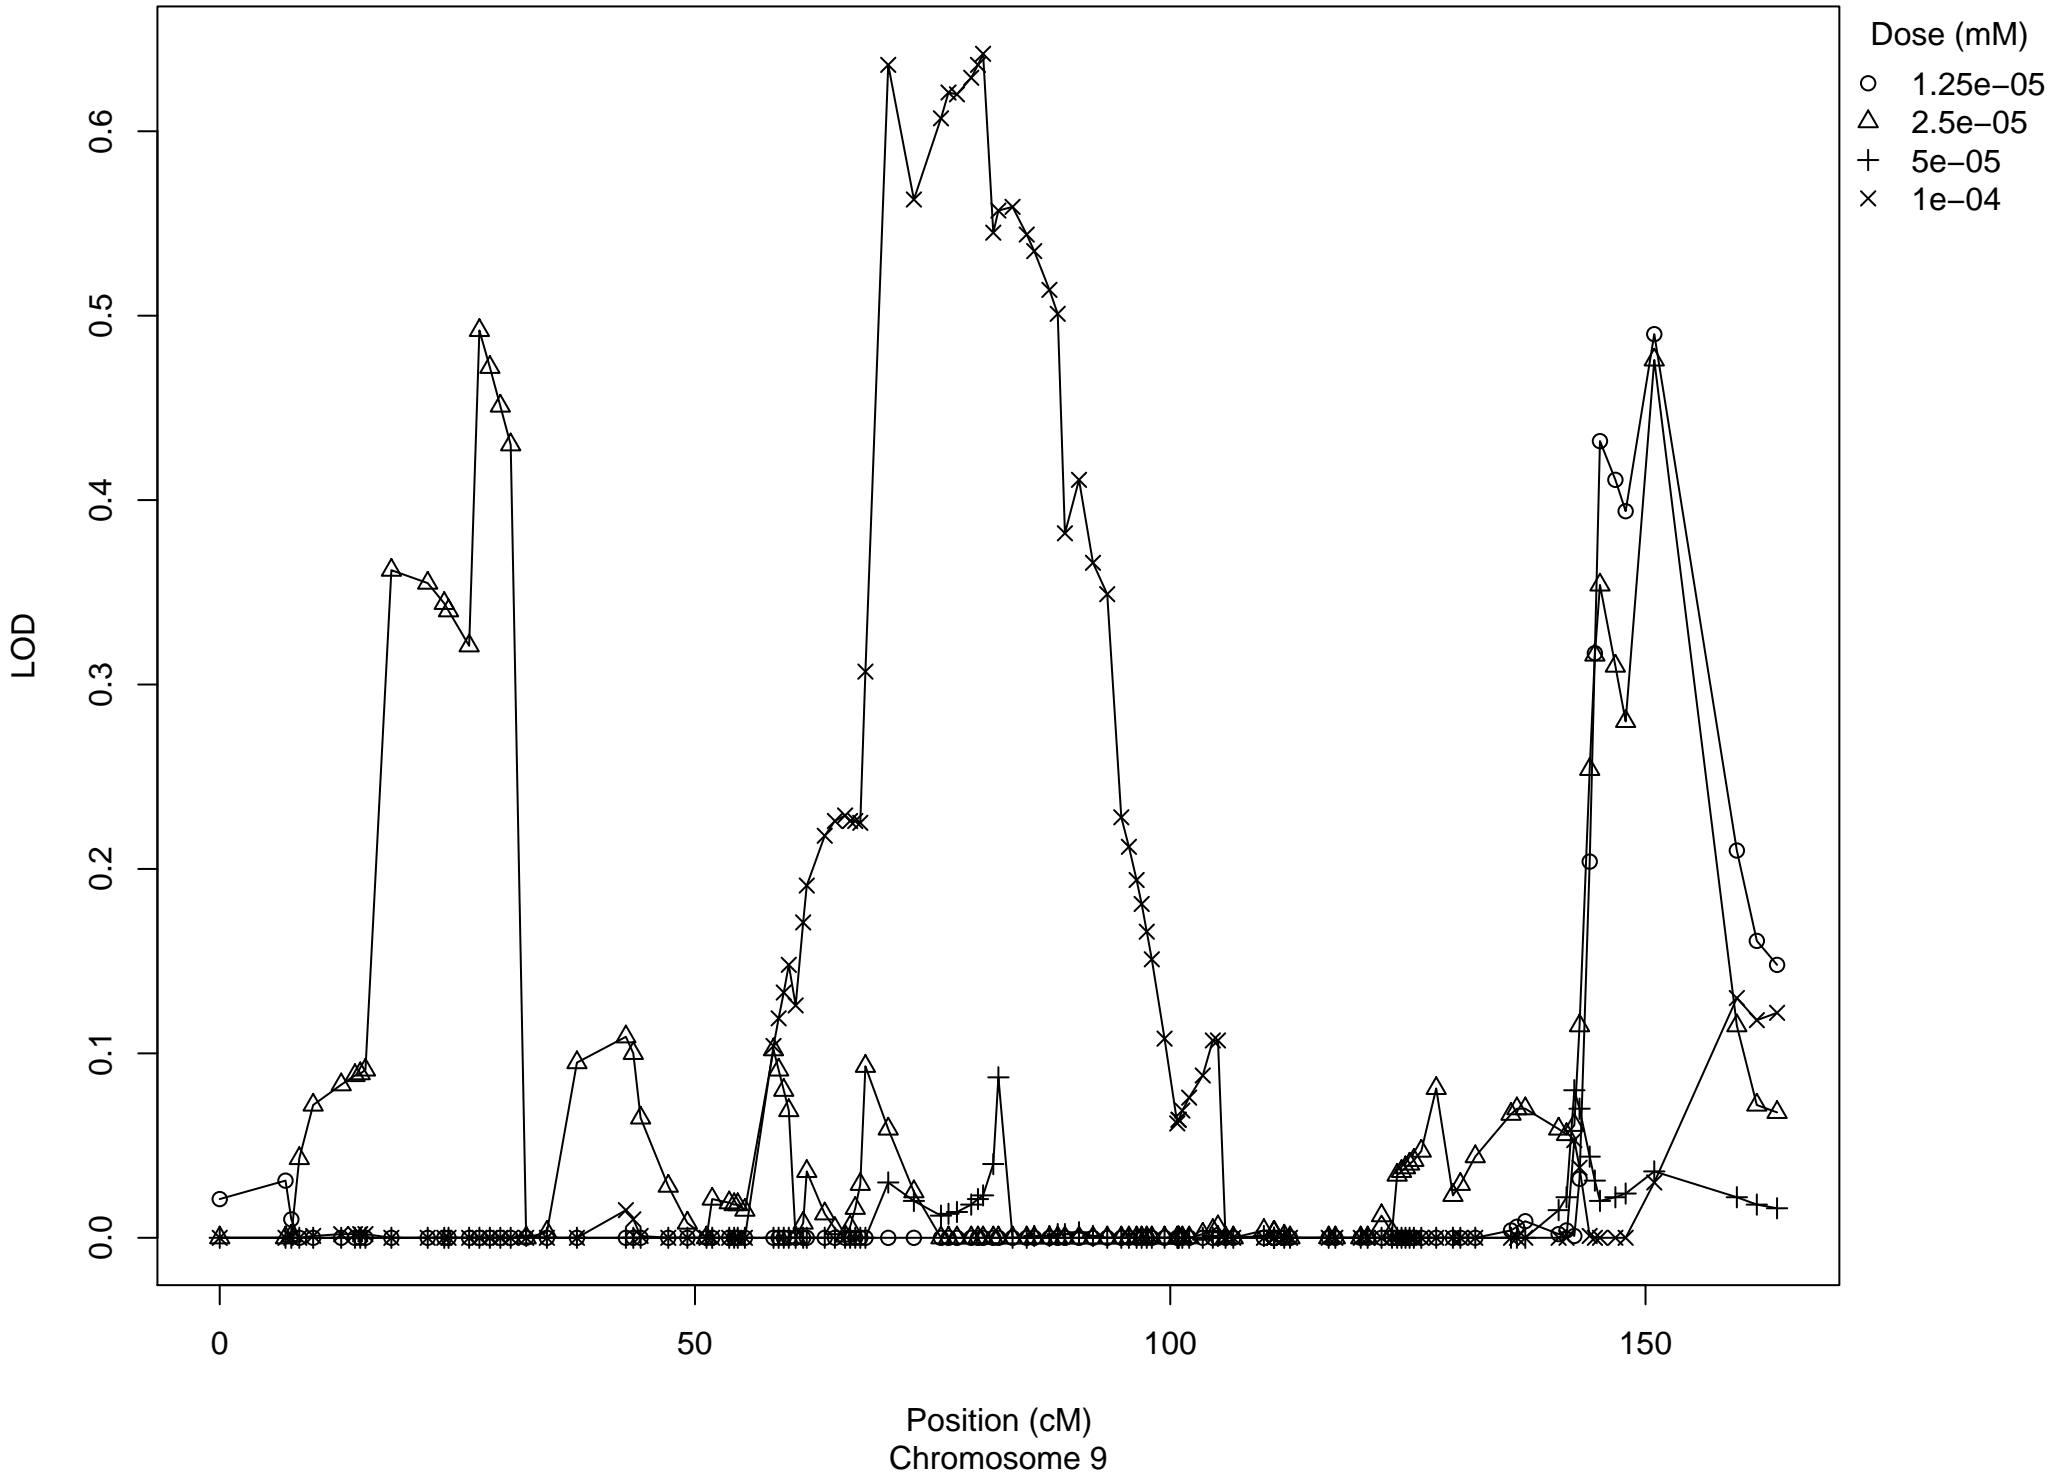

# Daunorubicin hydrochloride (Daun)

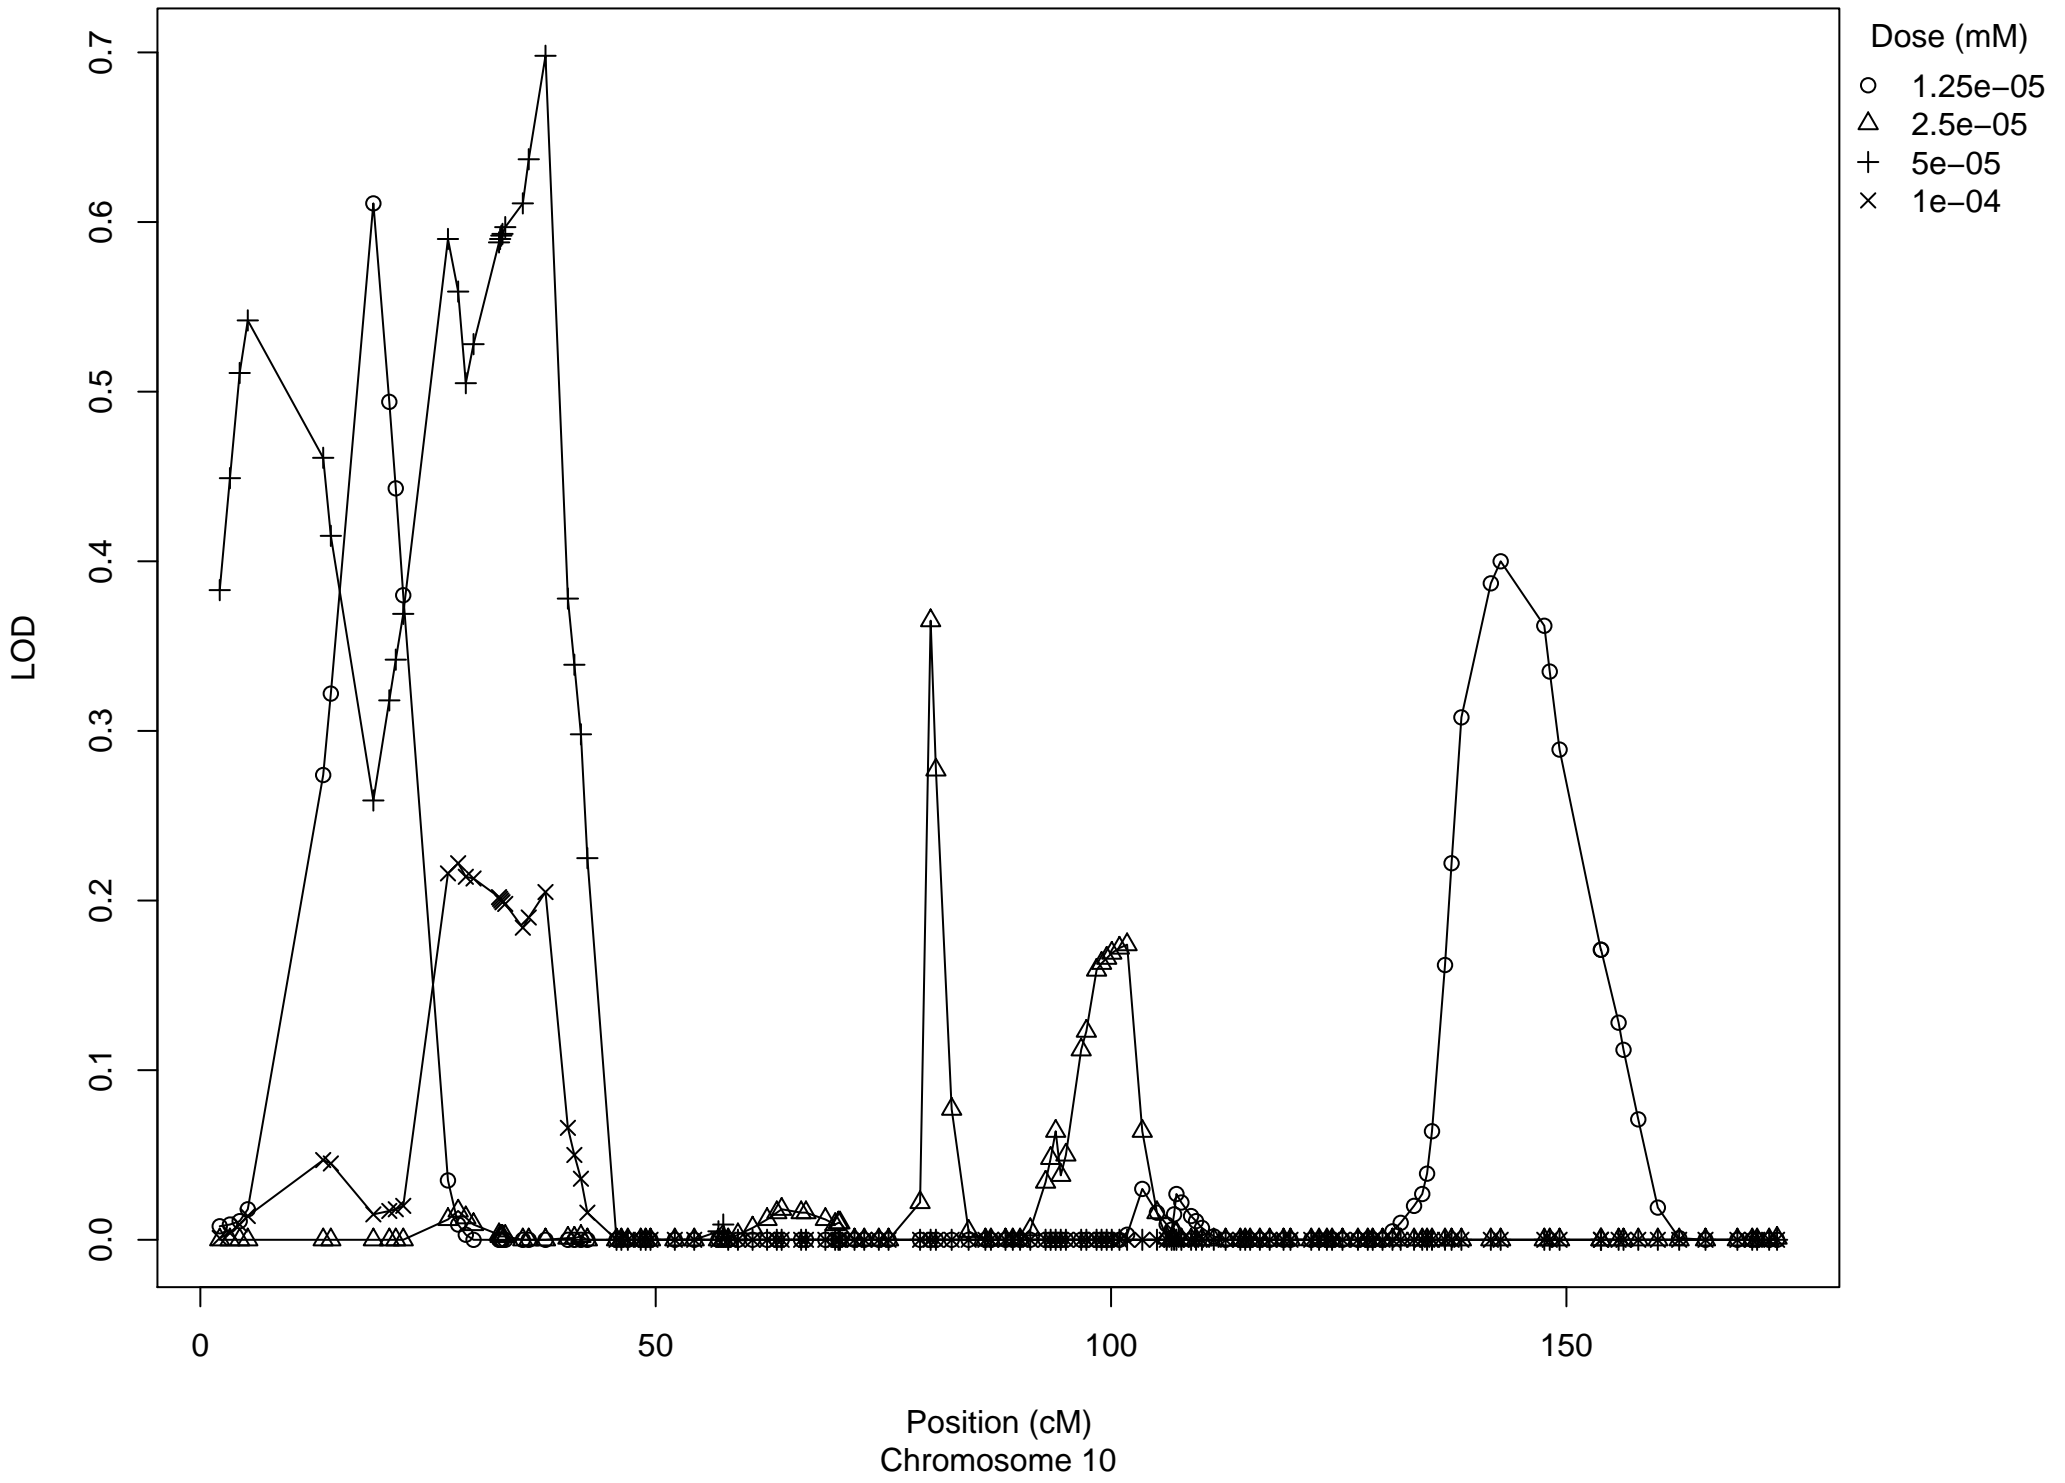

# Daunorubicin hydrochloride (Daun)

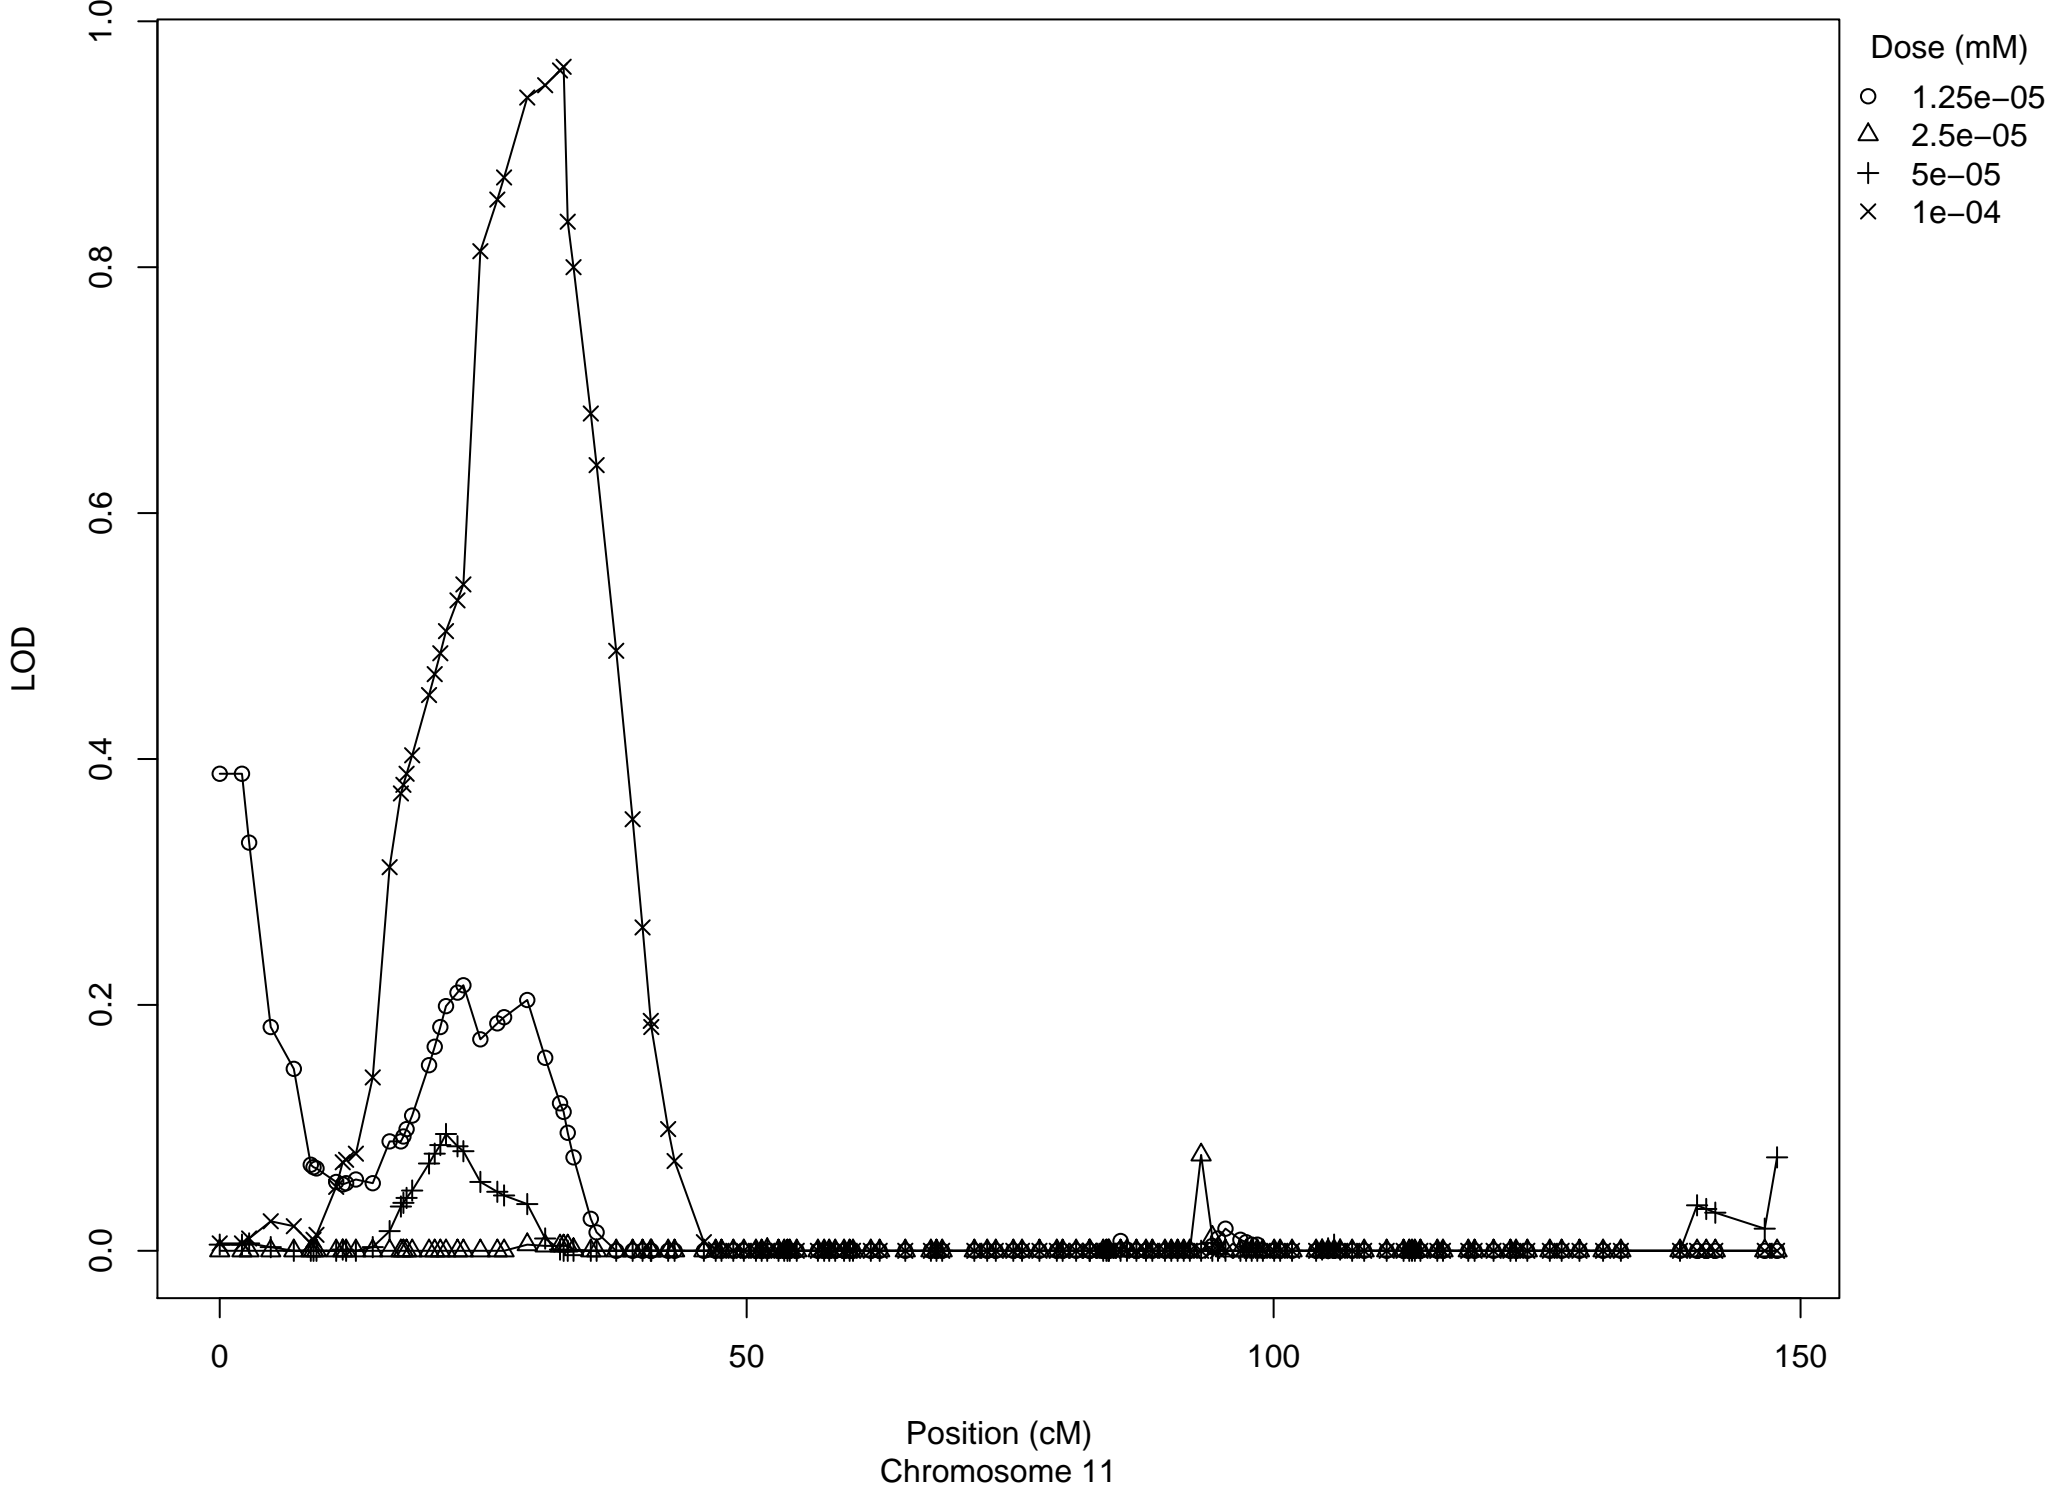

# Daunorubicin hydrochloride (Daun)

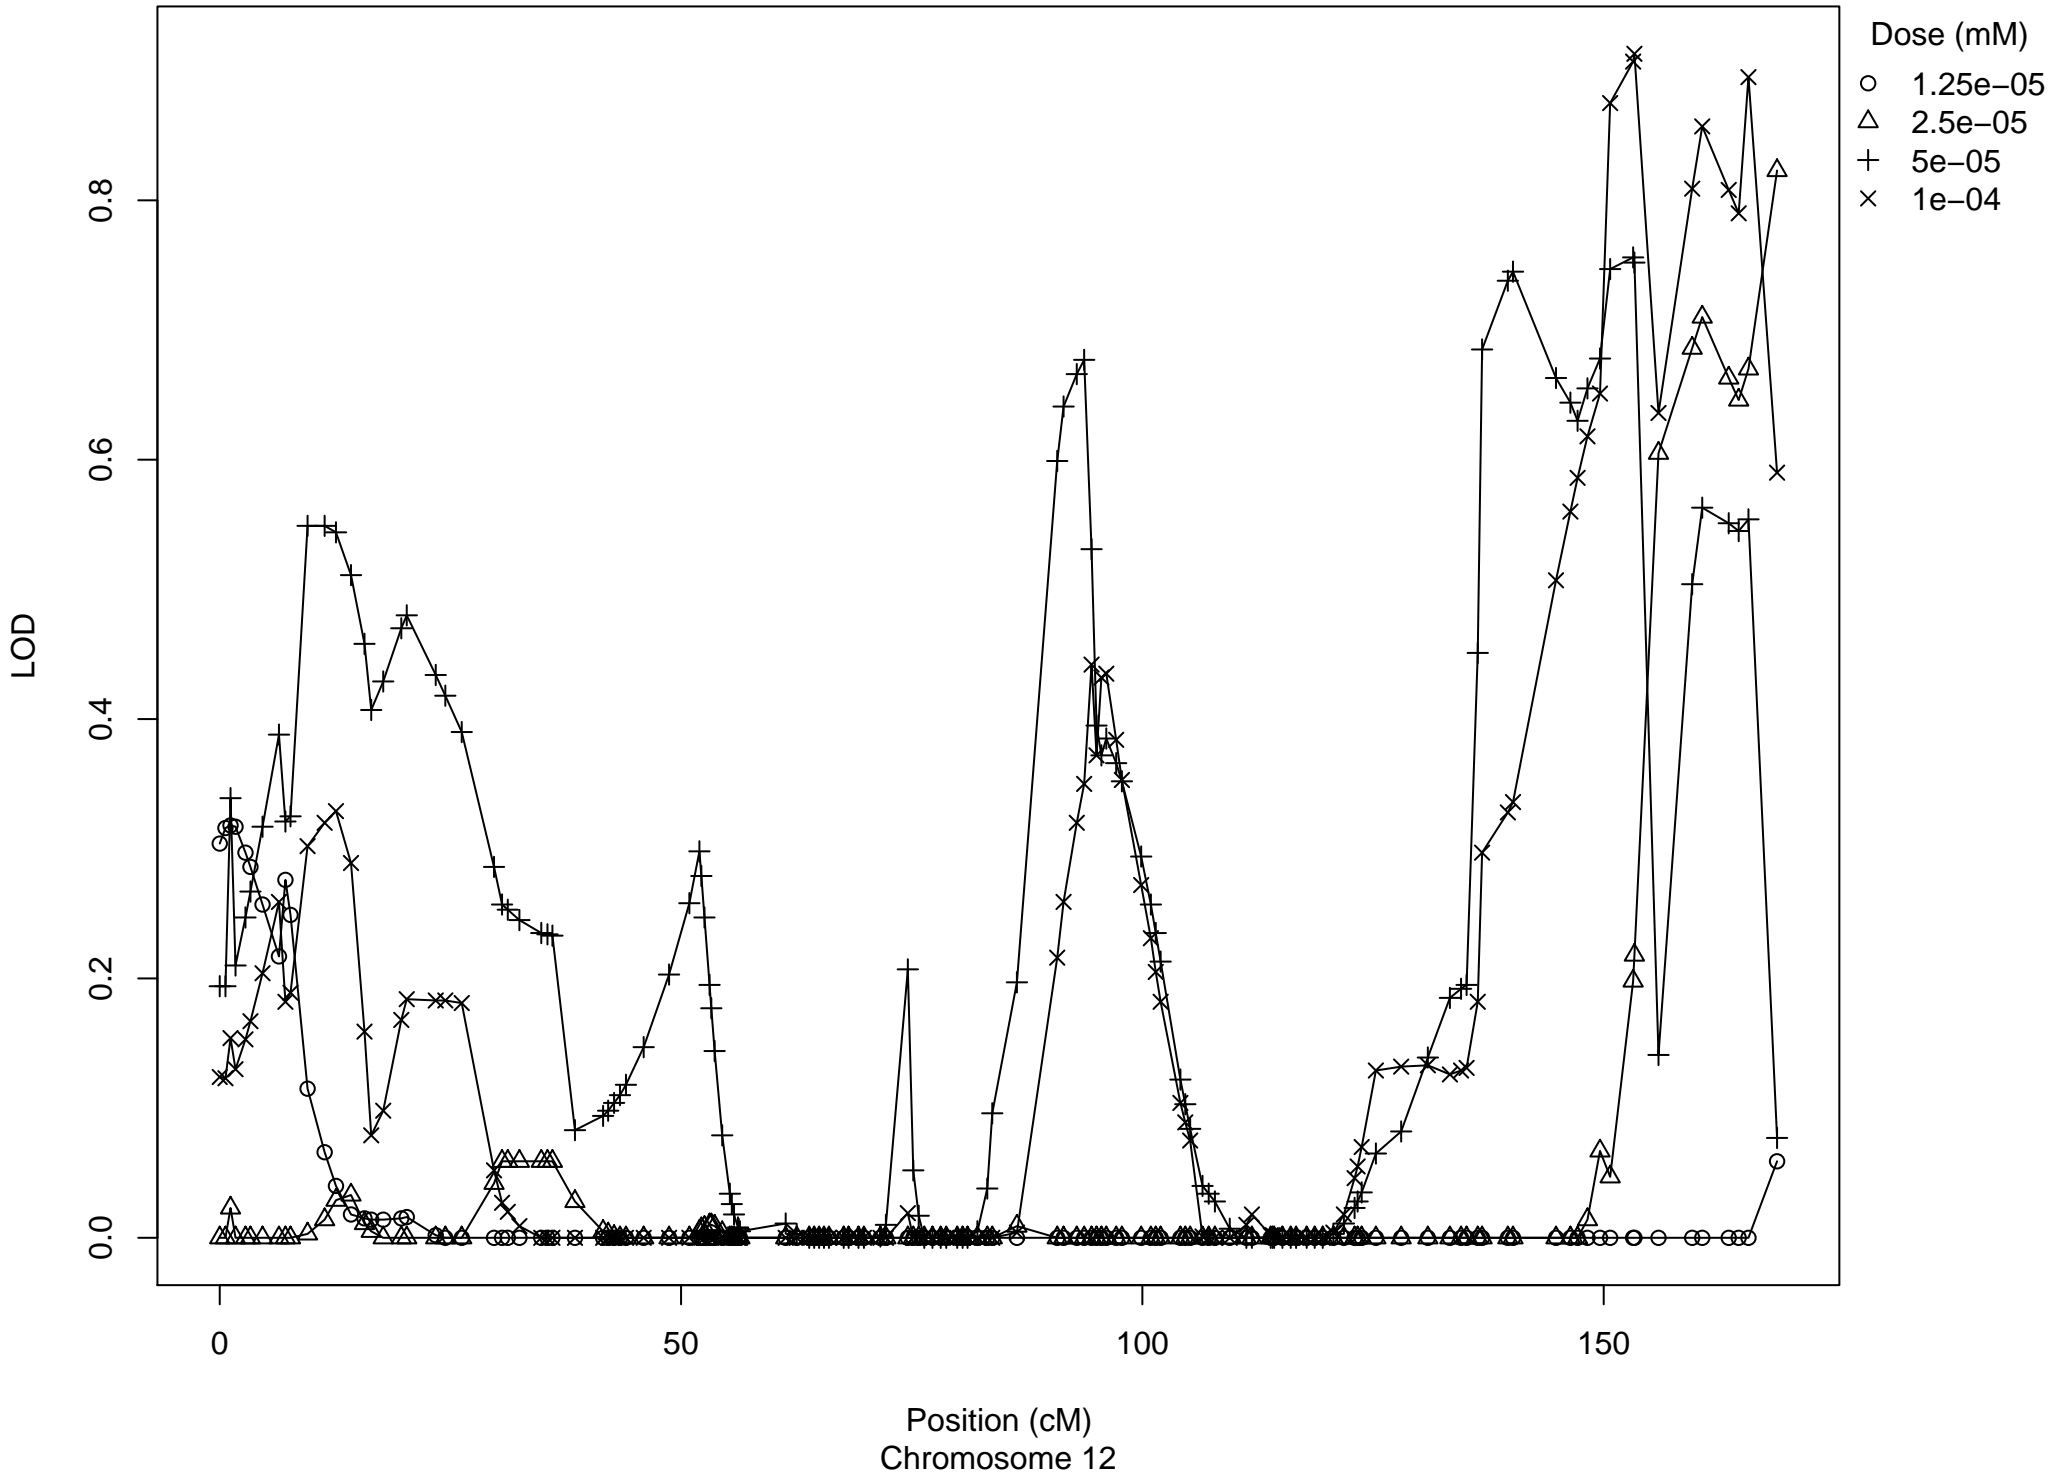



# Daunorubicin hydrochloride (Daun)

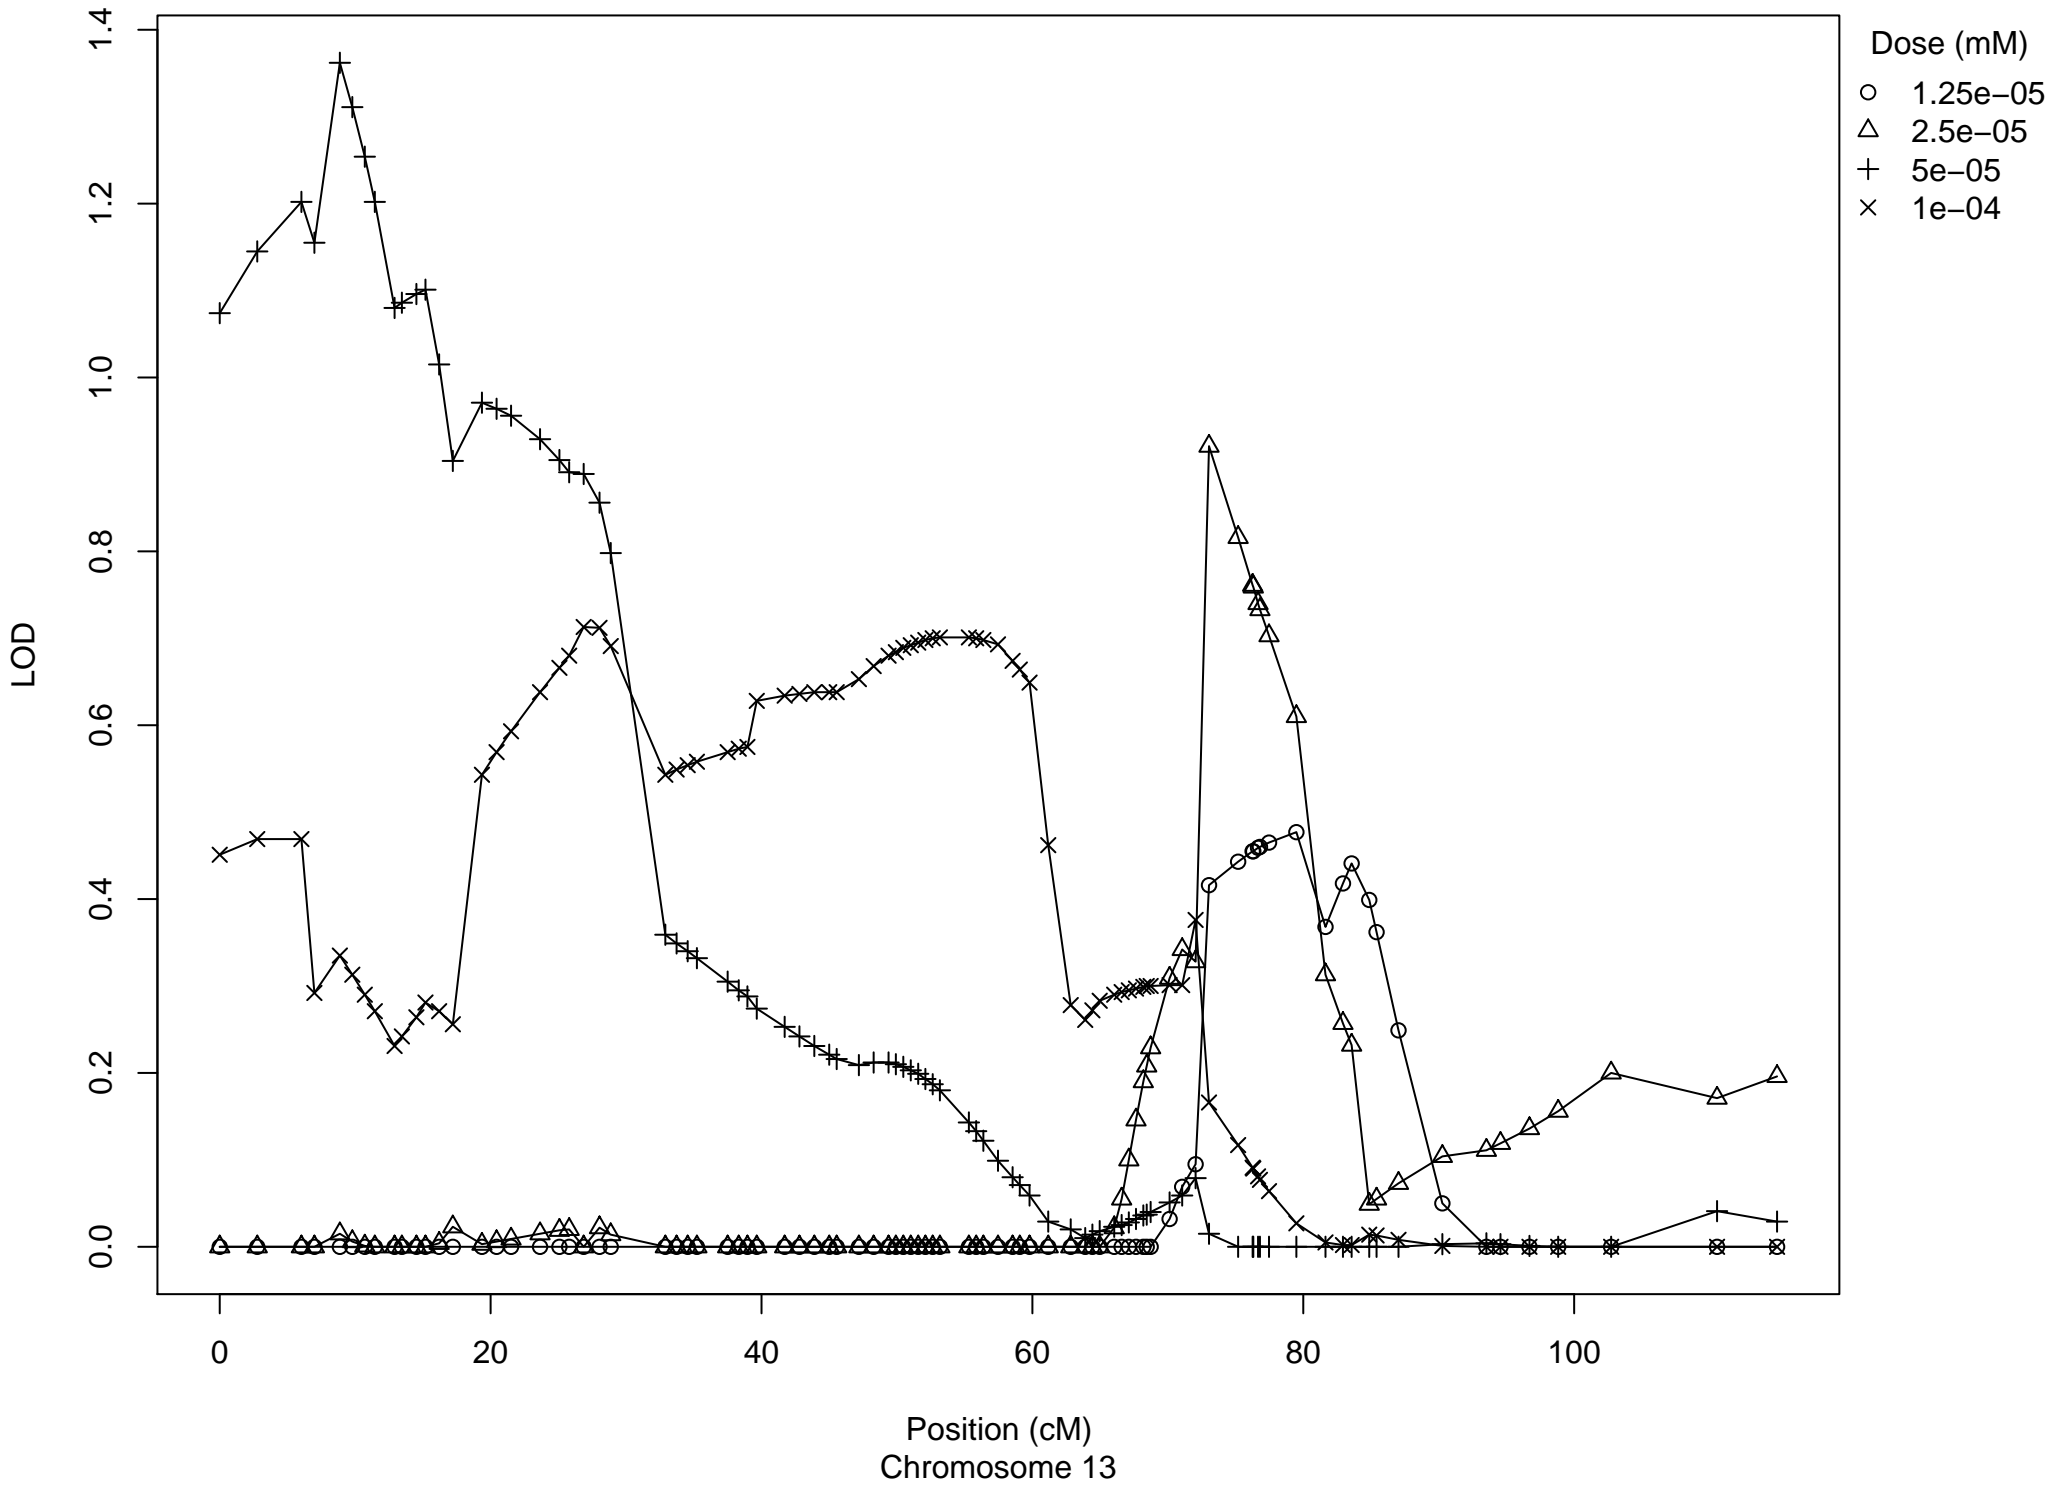

# Daunorubicin hydrochloride (Daun)

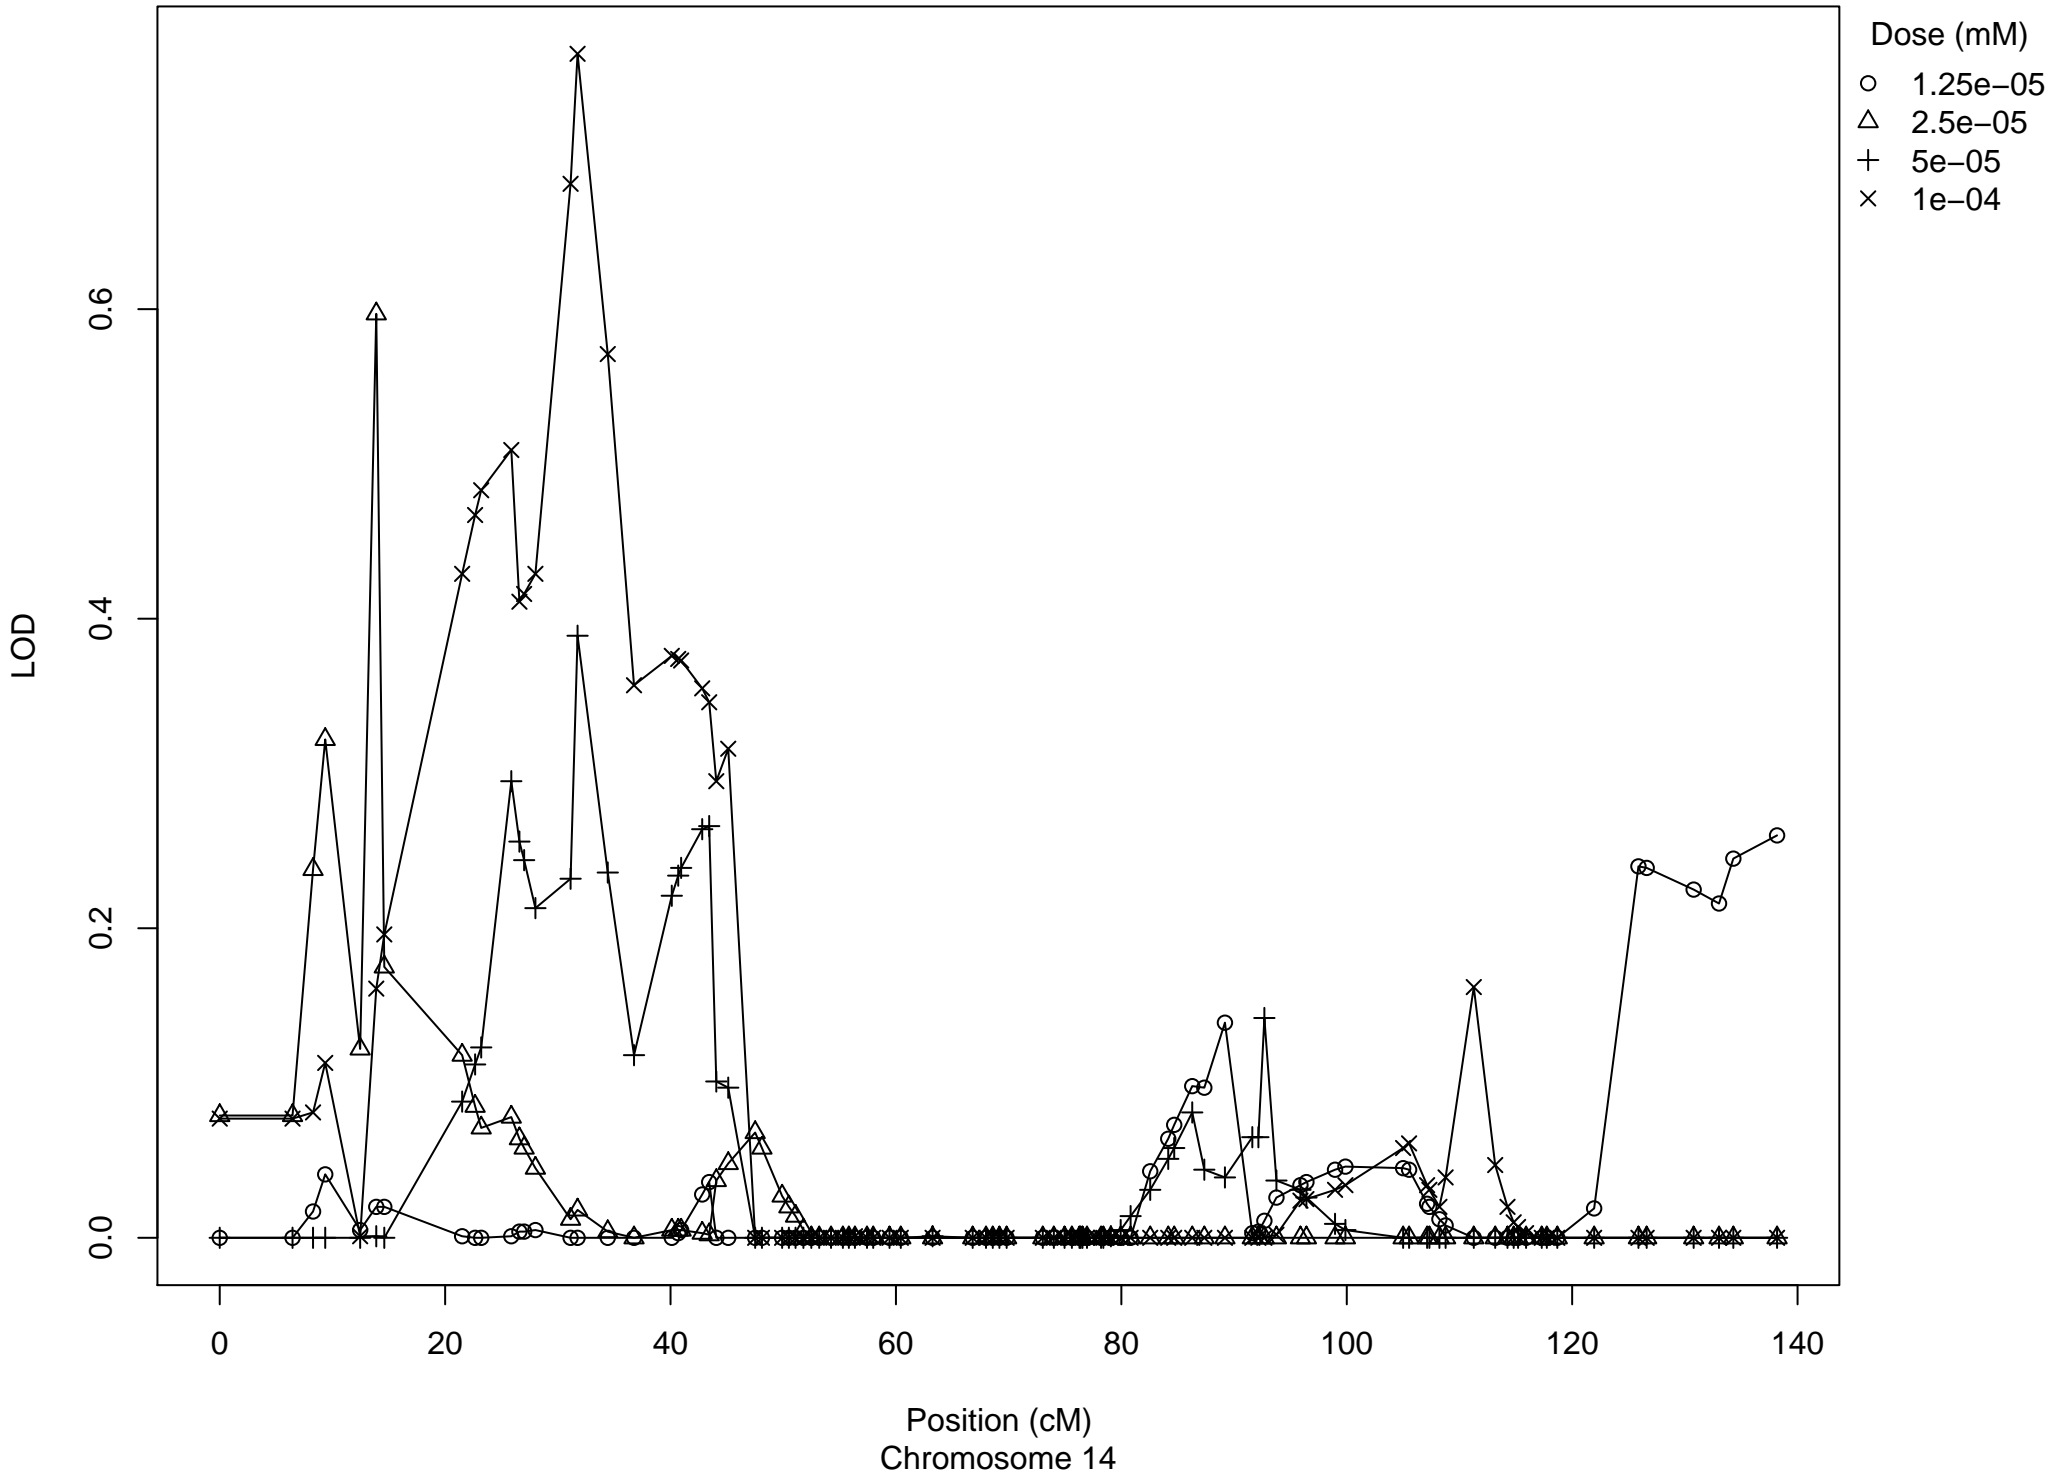

# Daunorubicin hydrochloride (Daun)

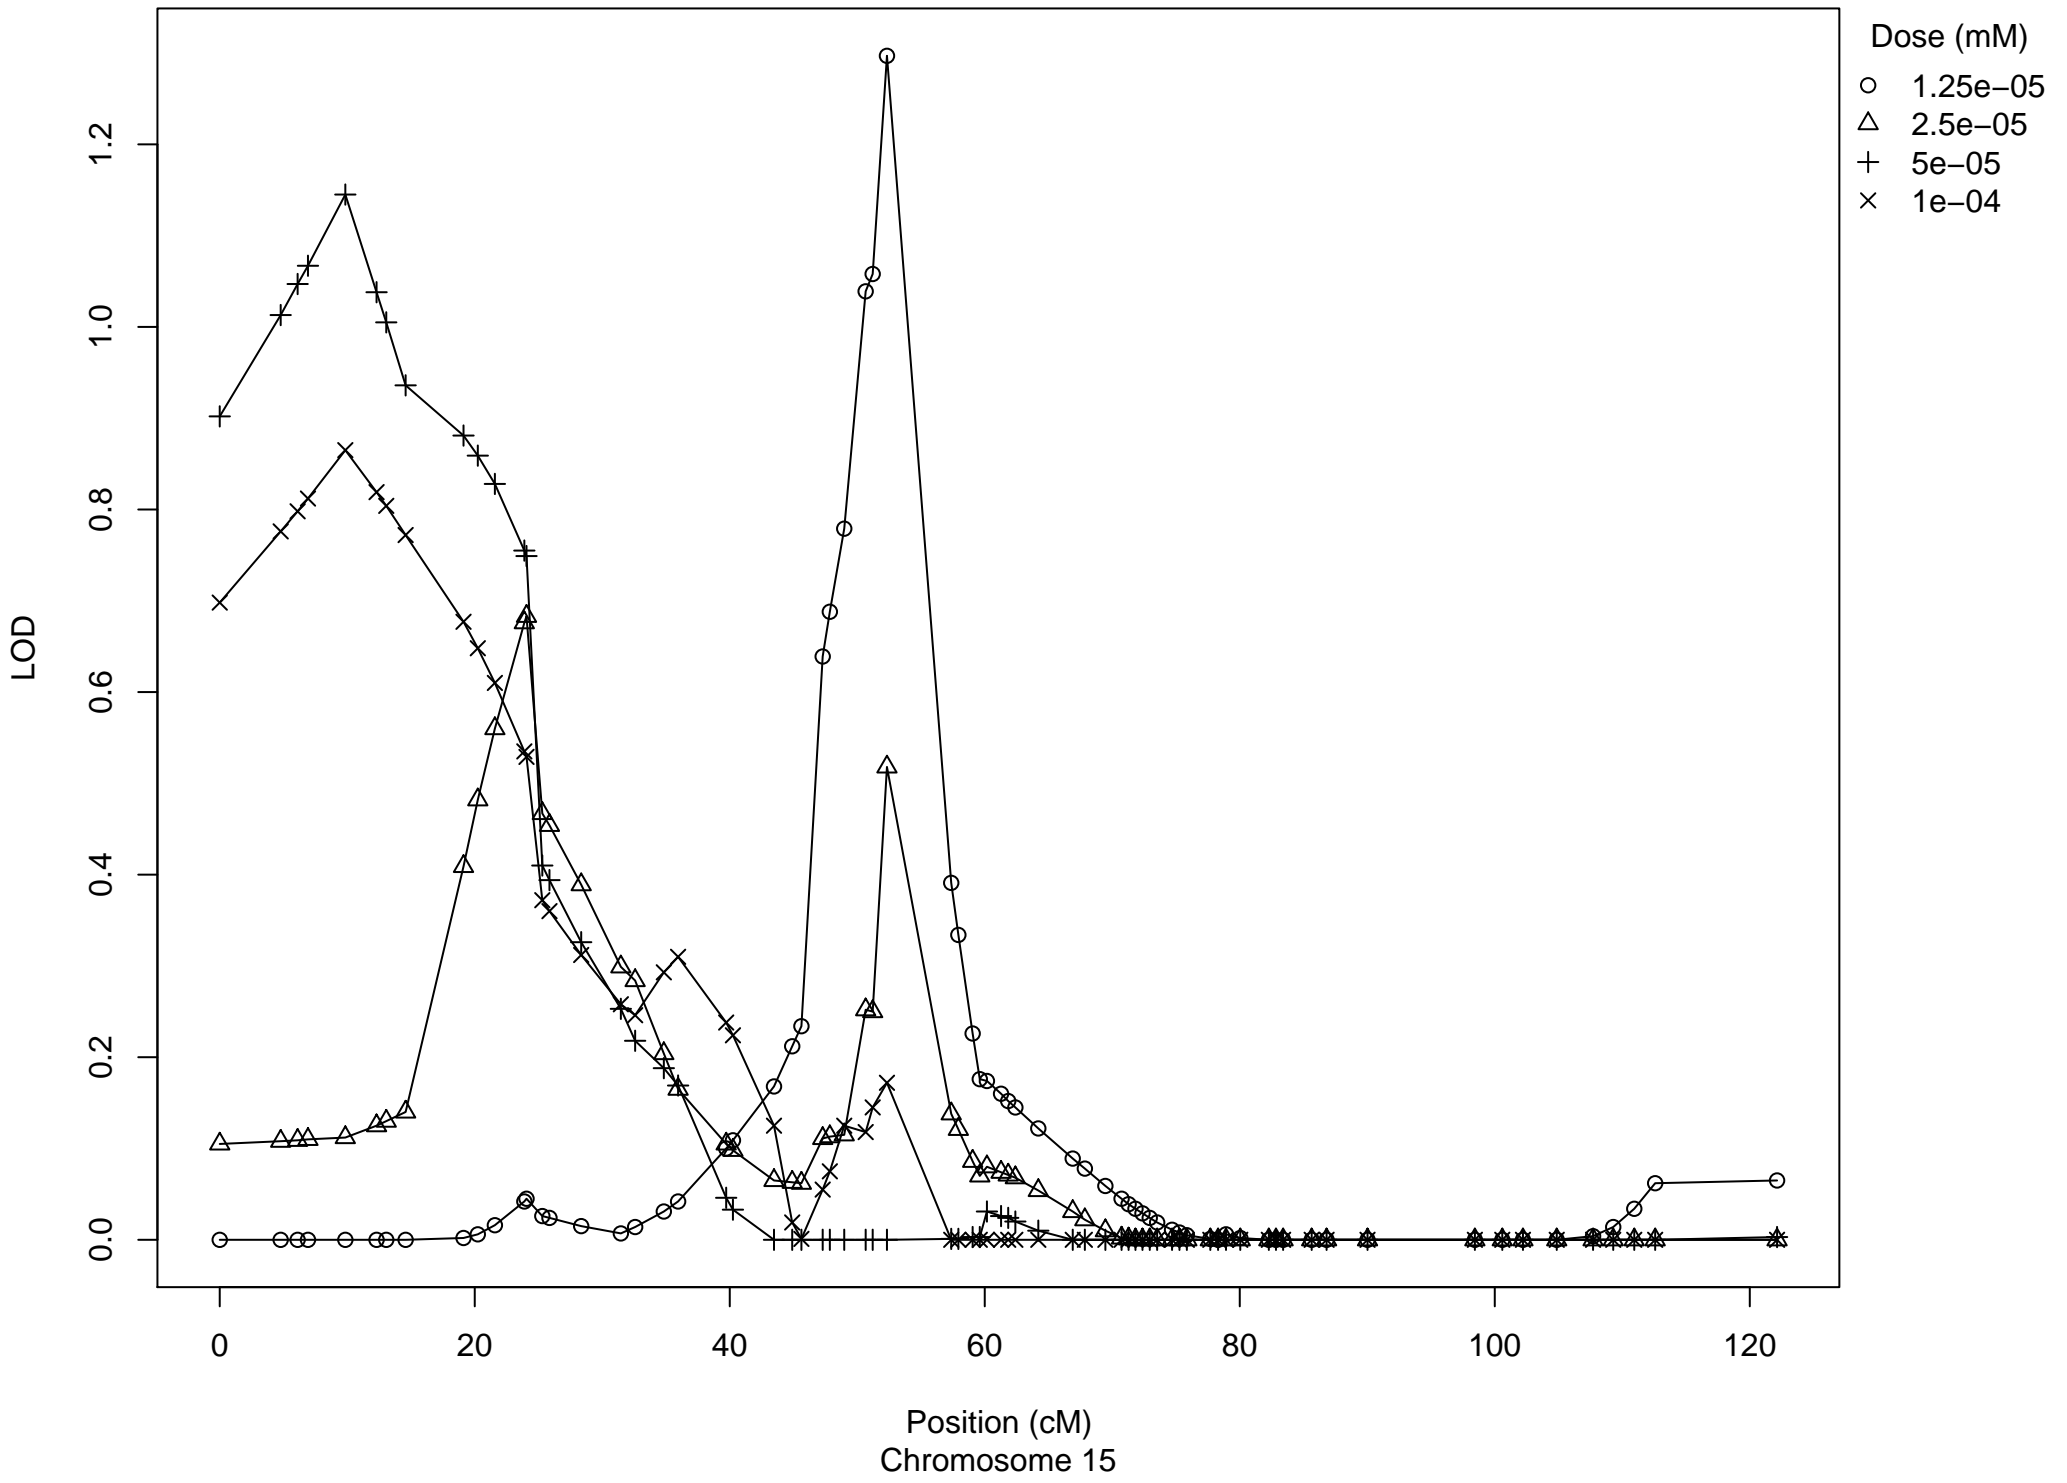

# Daunorubicin hydrochloride (Daun)

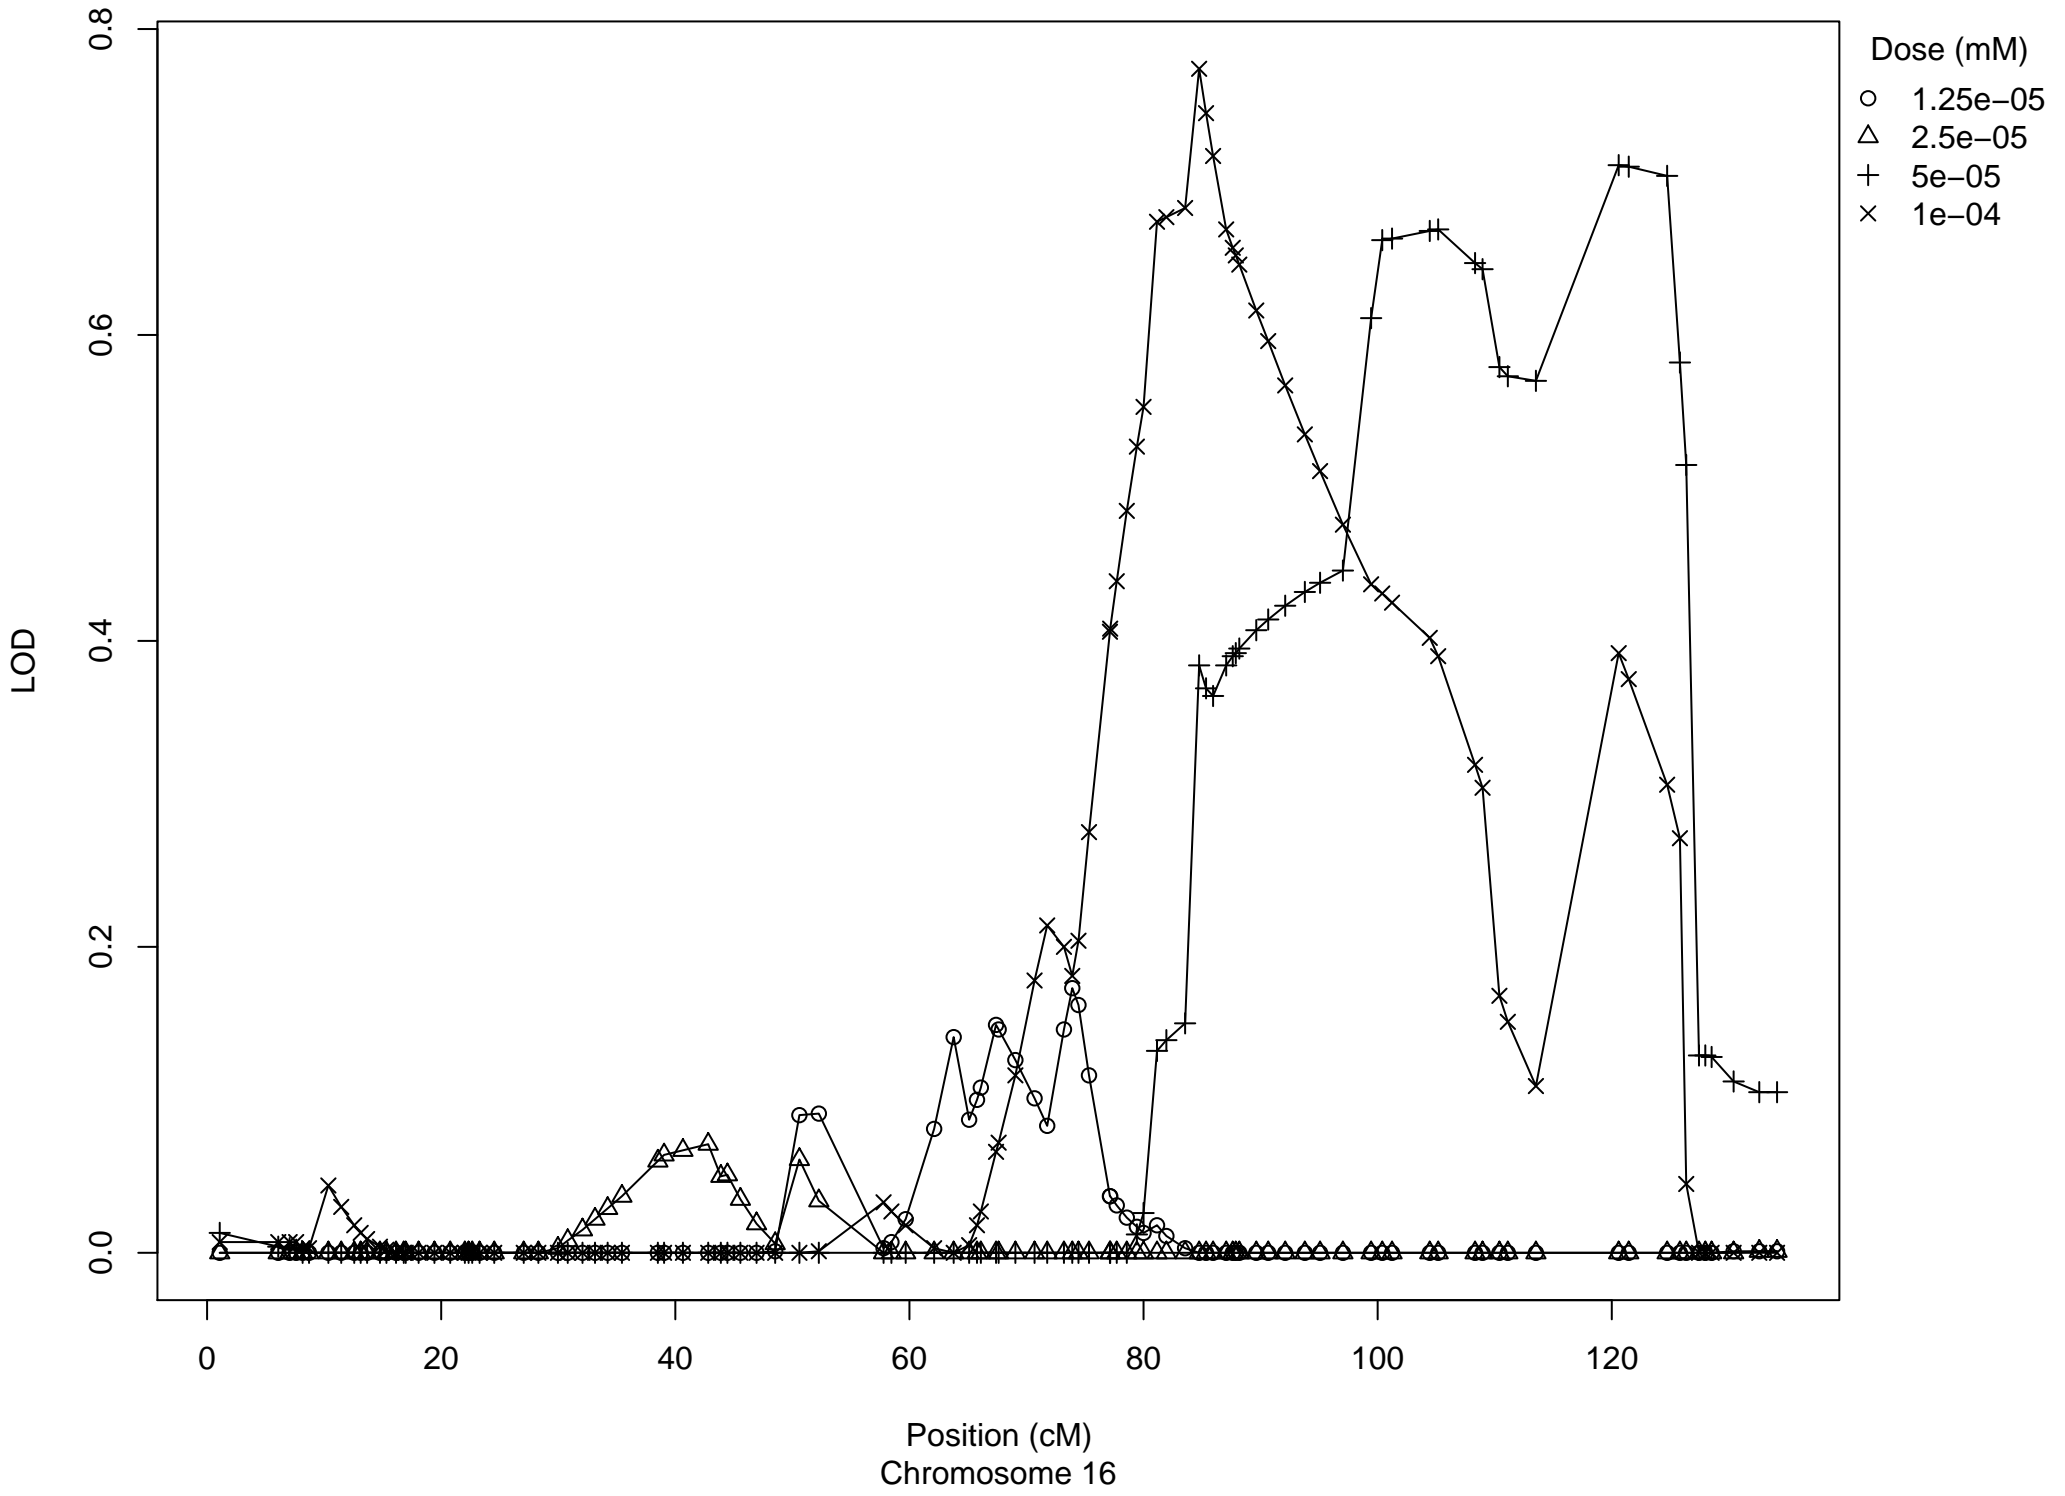

# Daunorubicin hydrochloride (Daun)

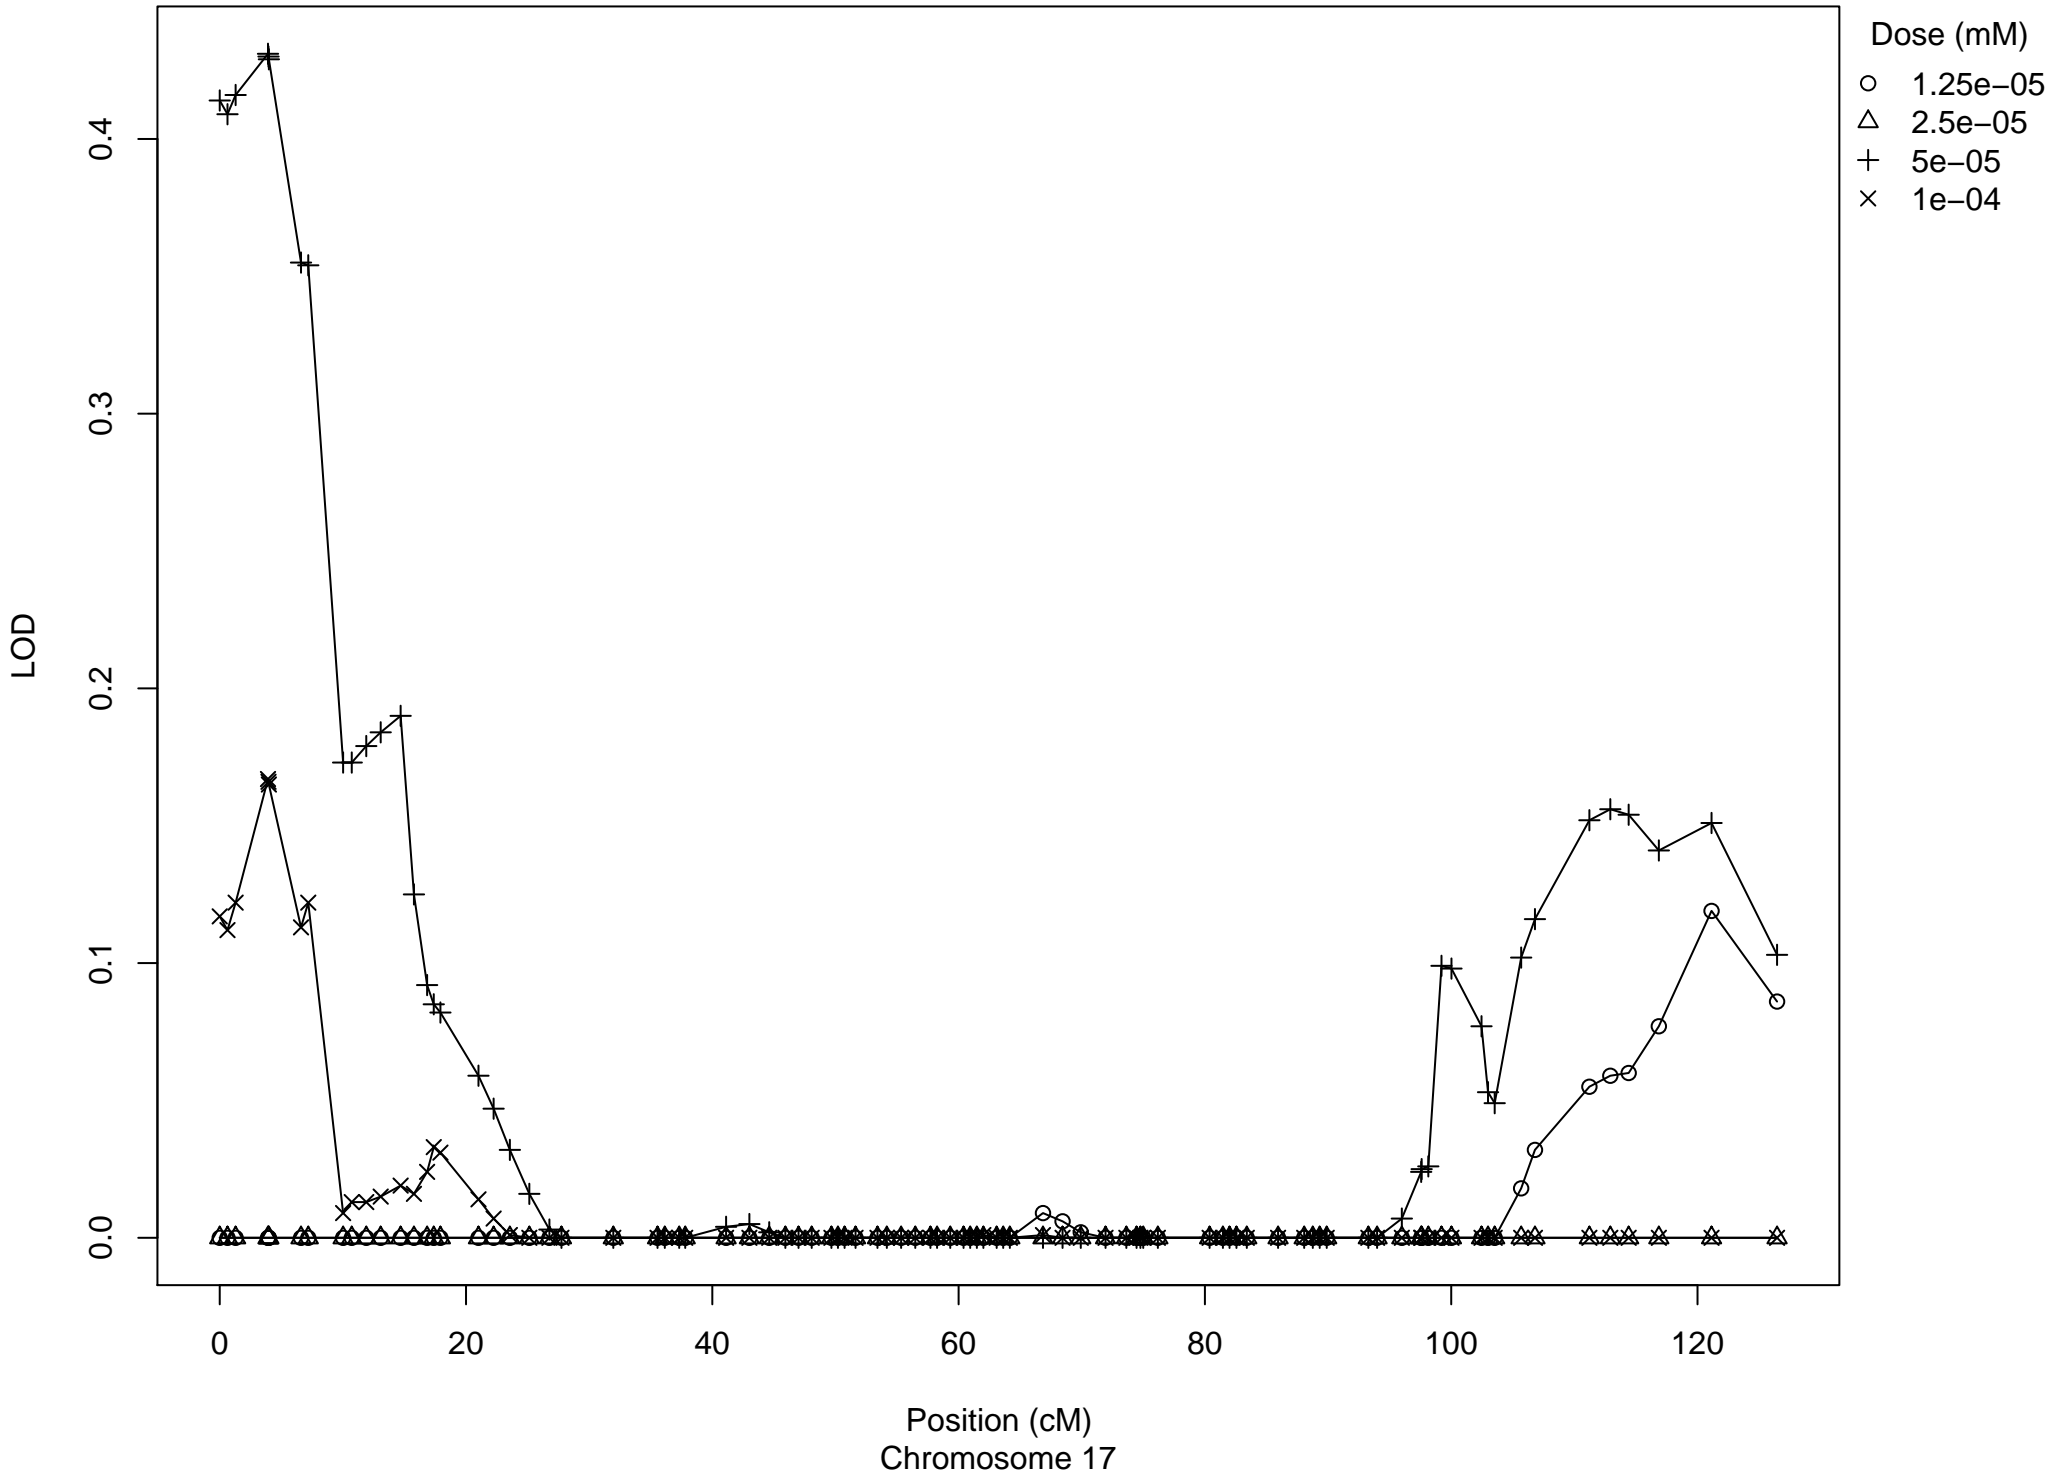

# Daunorubicin hydrochloride (Daun)

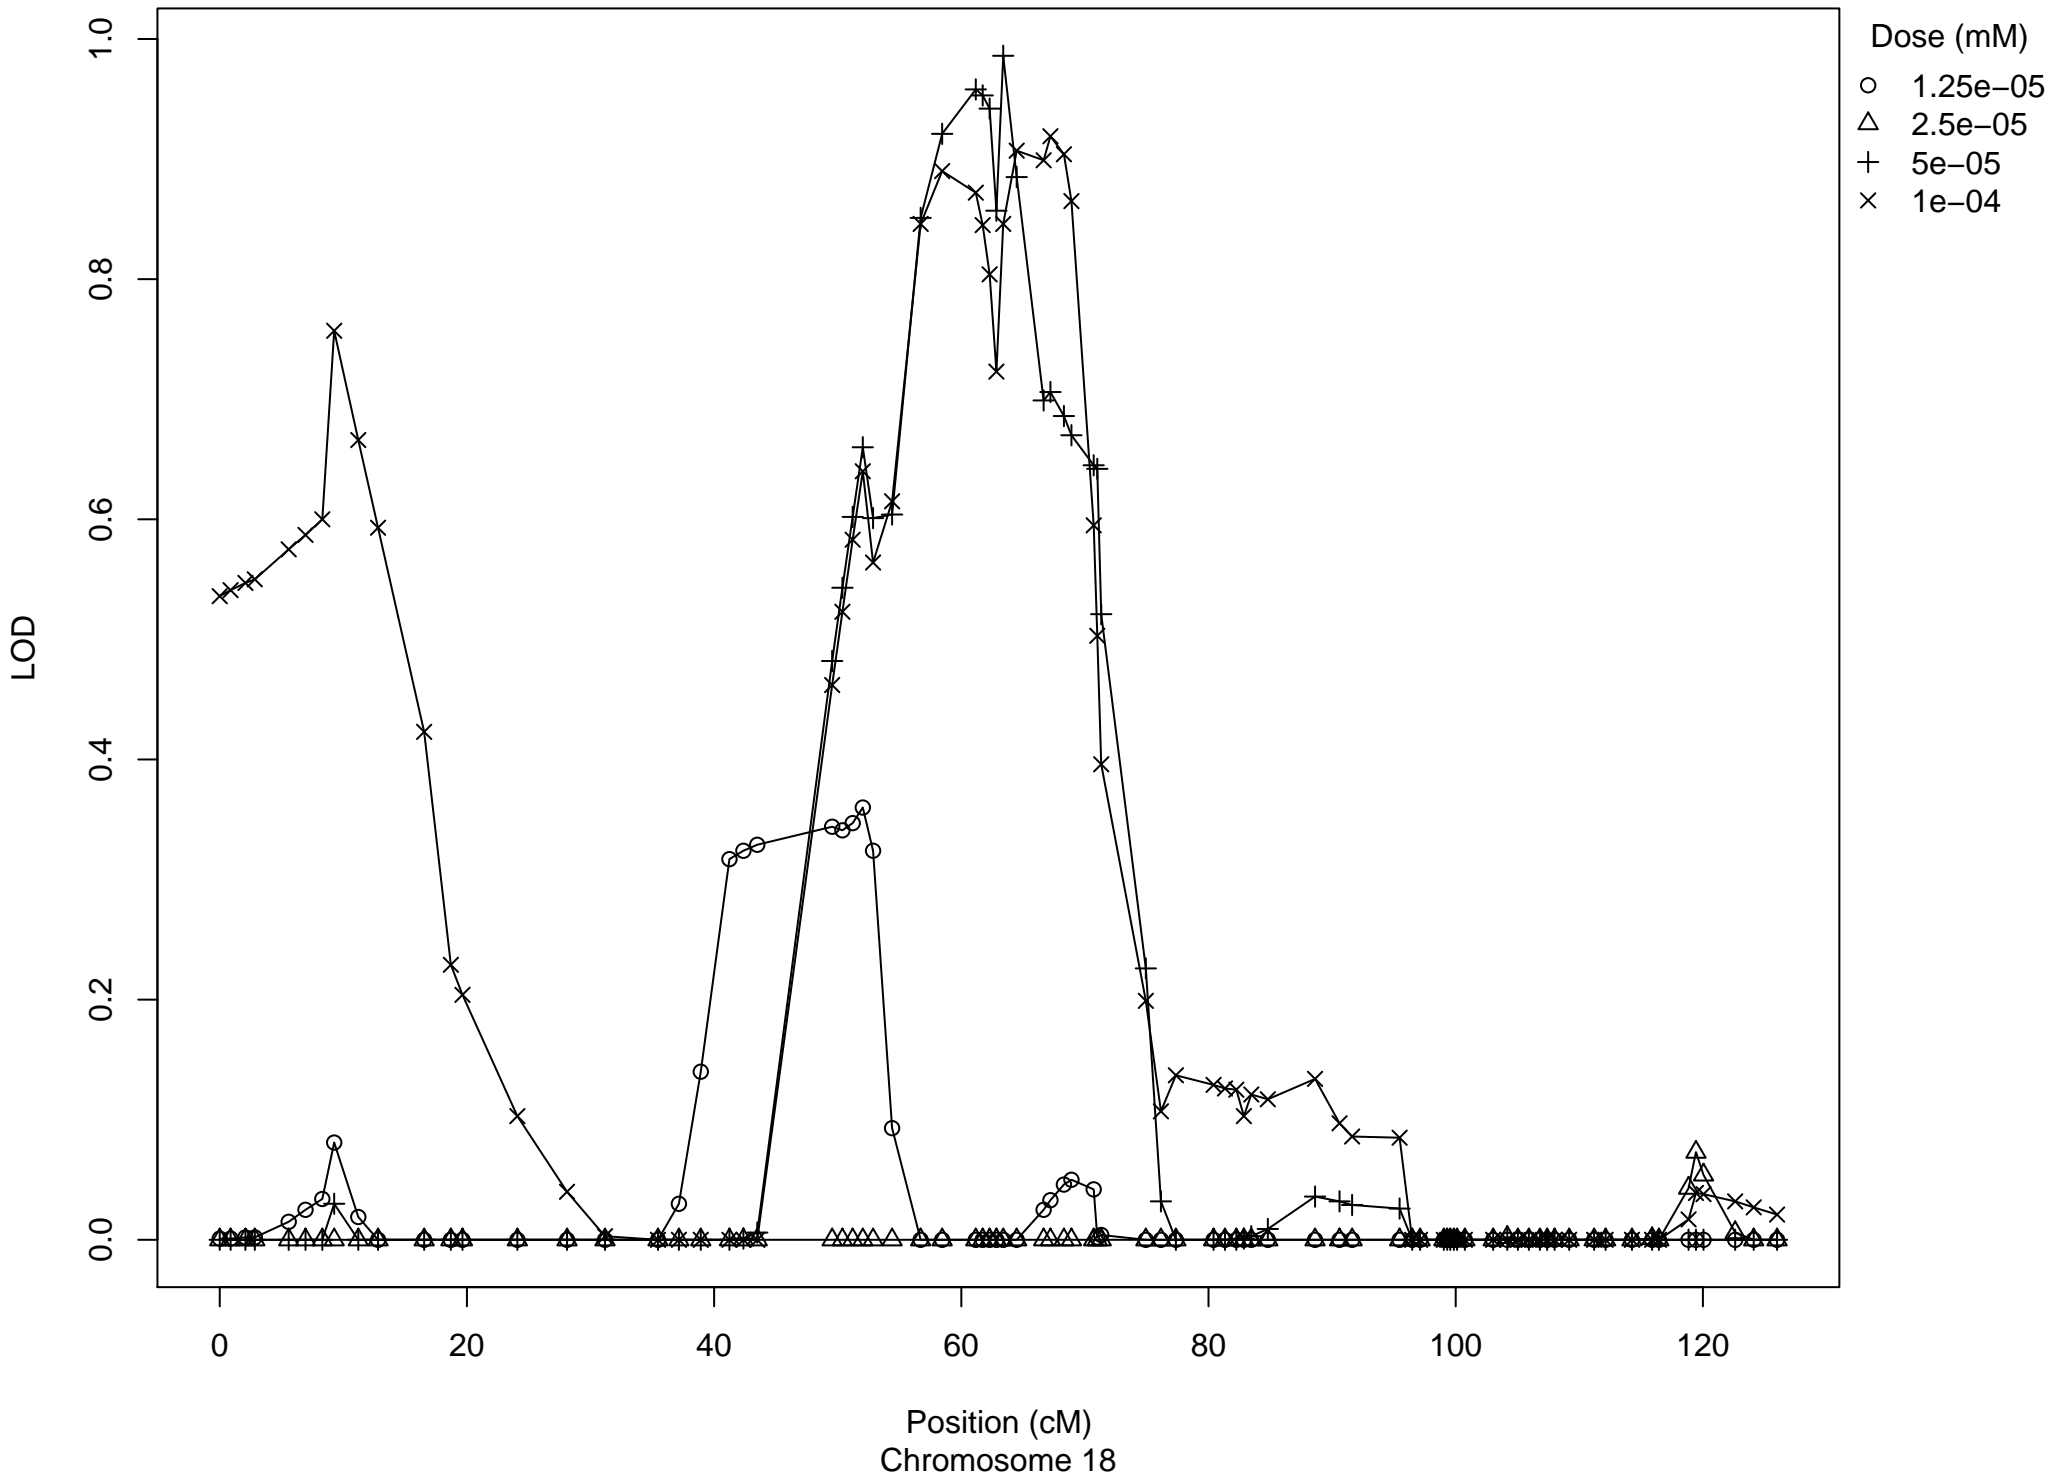

# Daunorubicin hydrochloride (Daun)

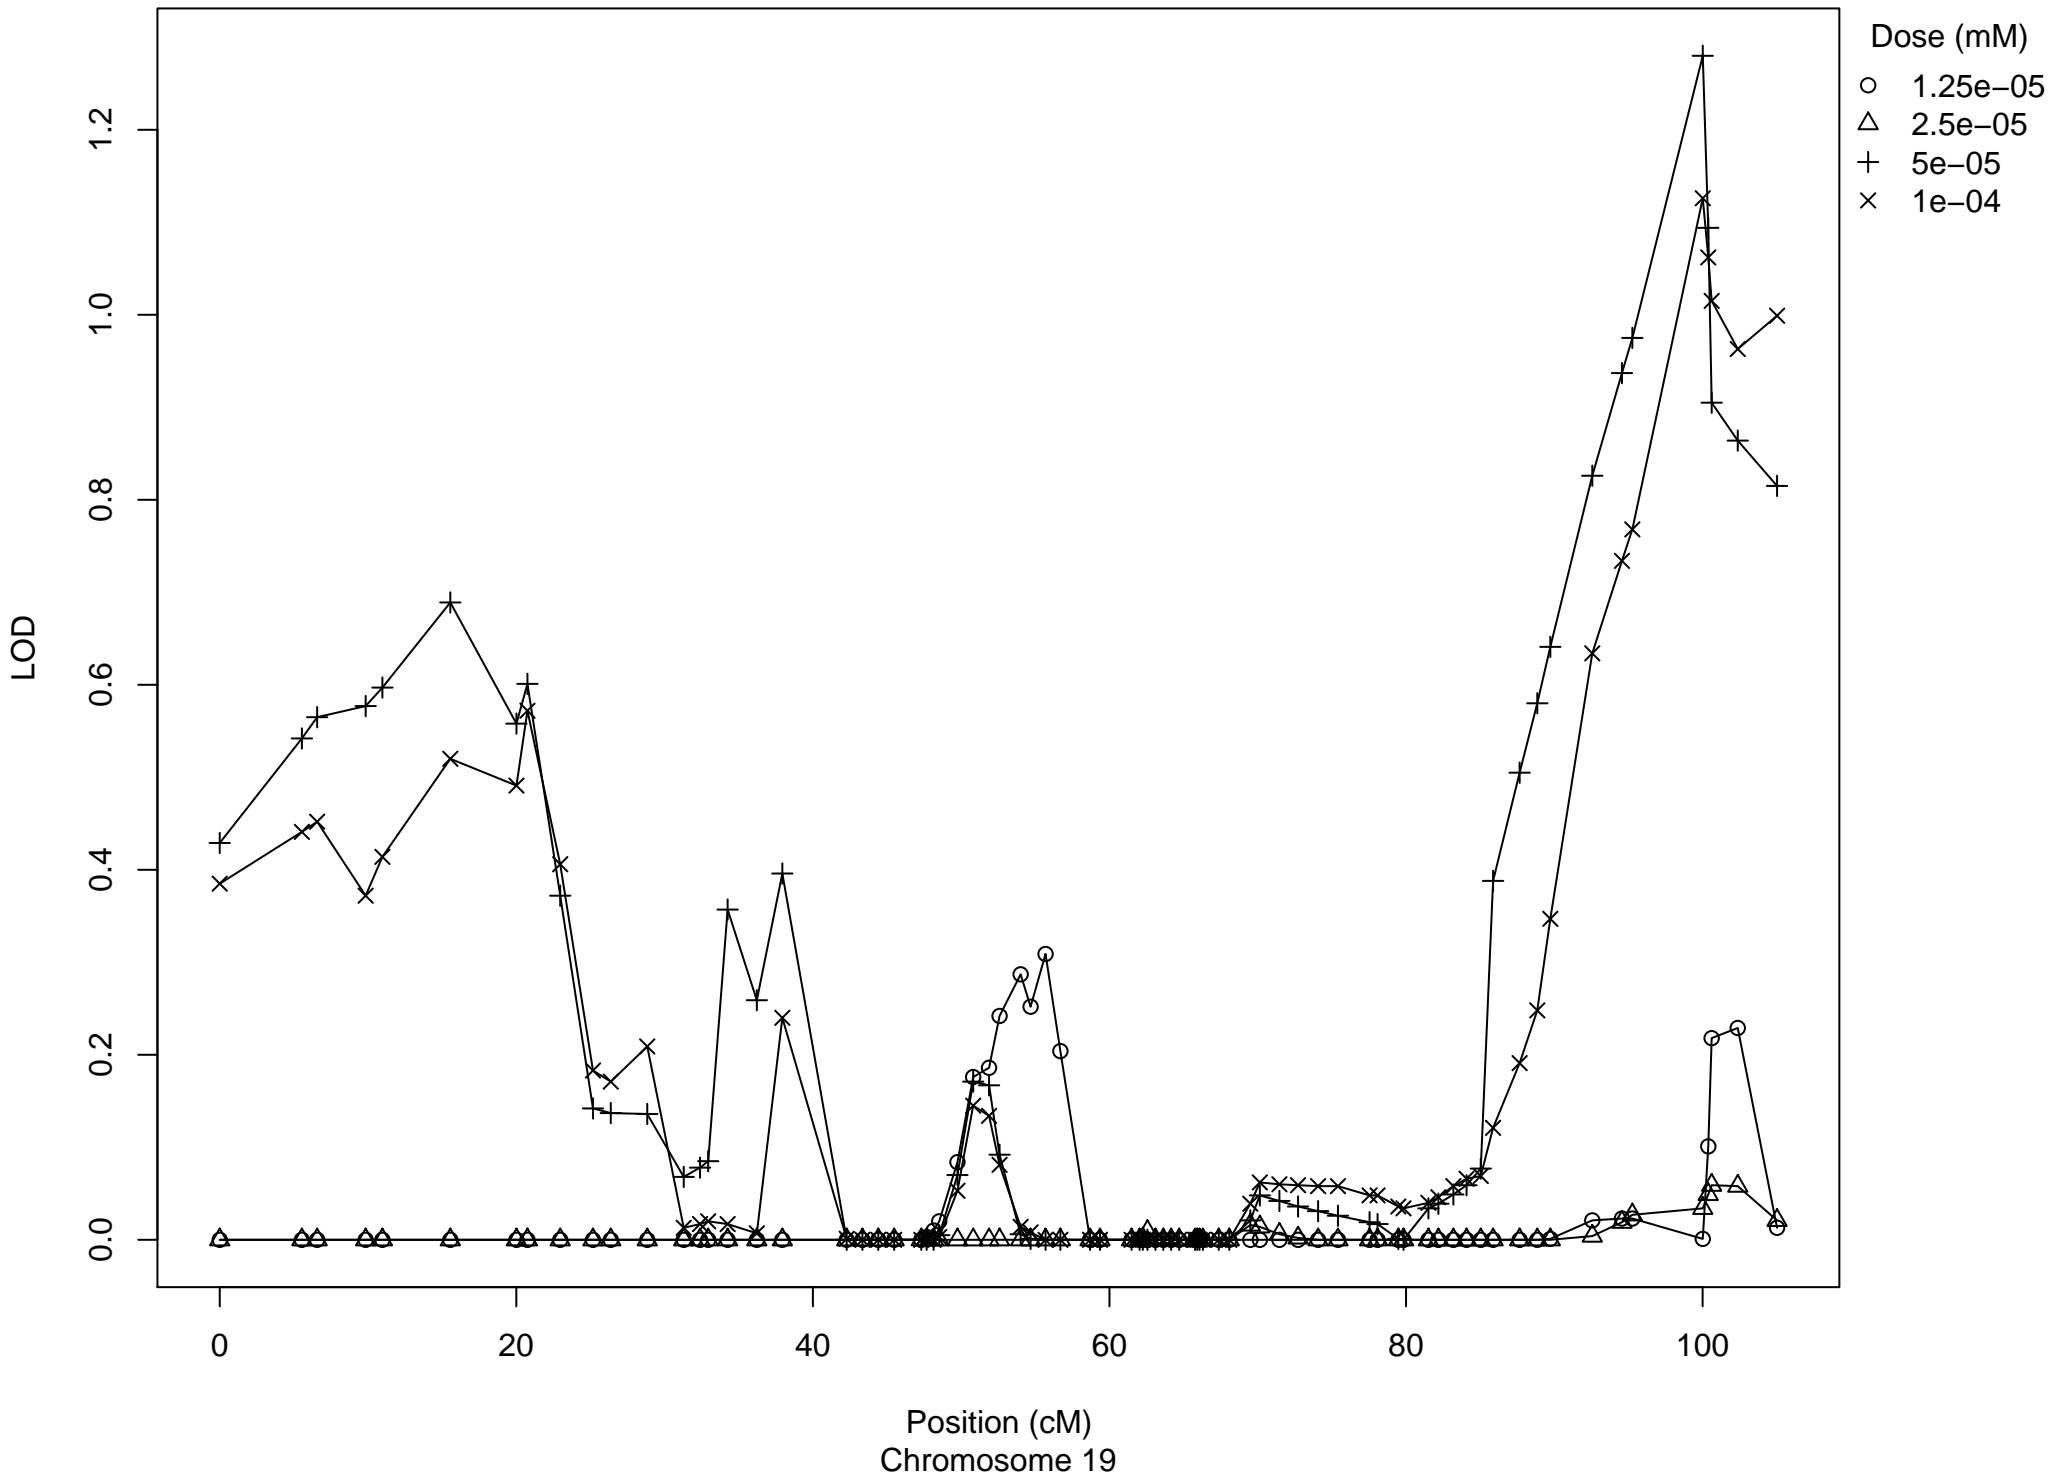

# Daunorubicin hydrochloride (Daun)

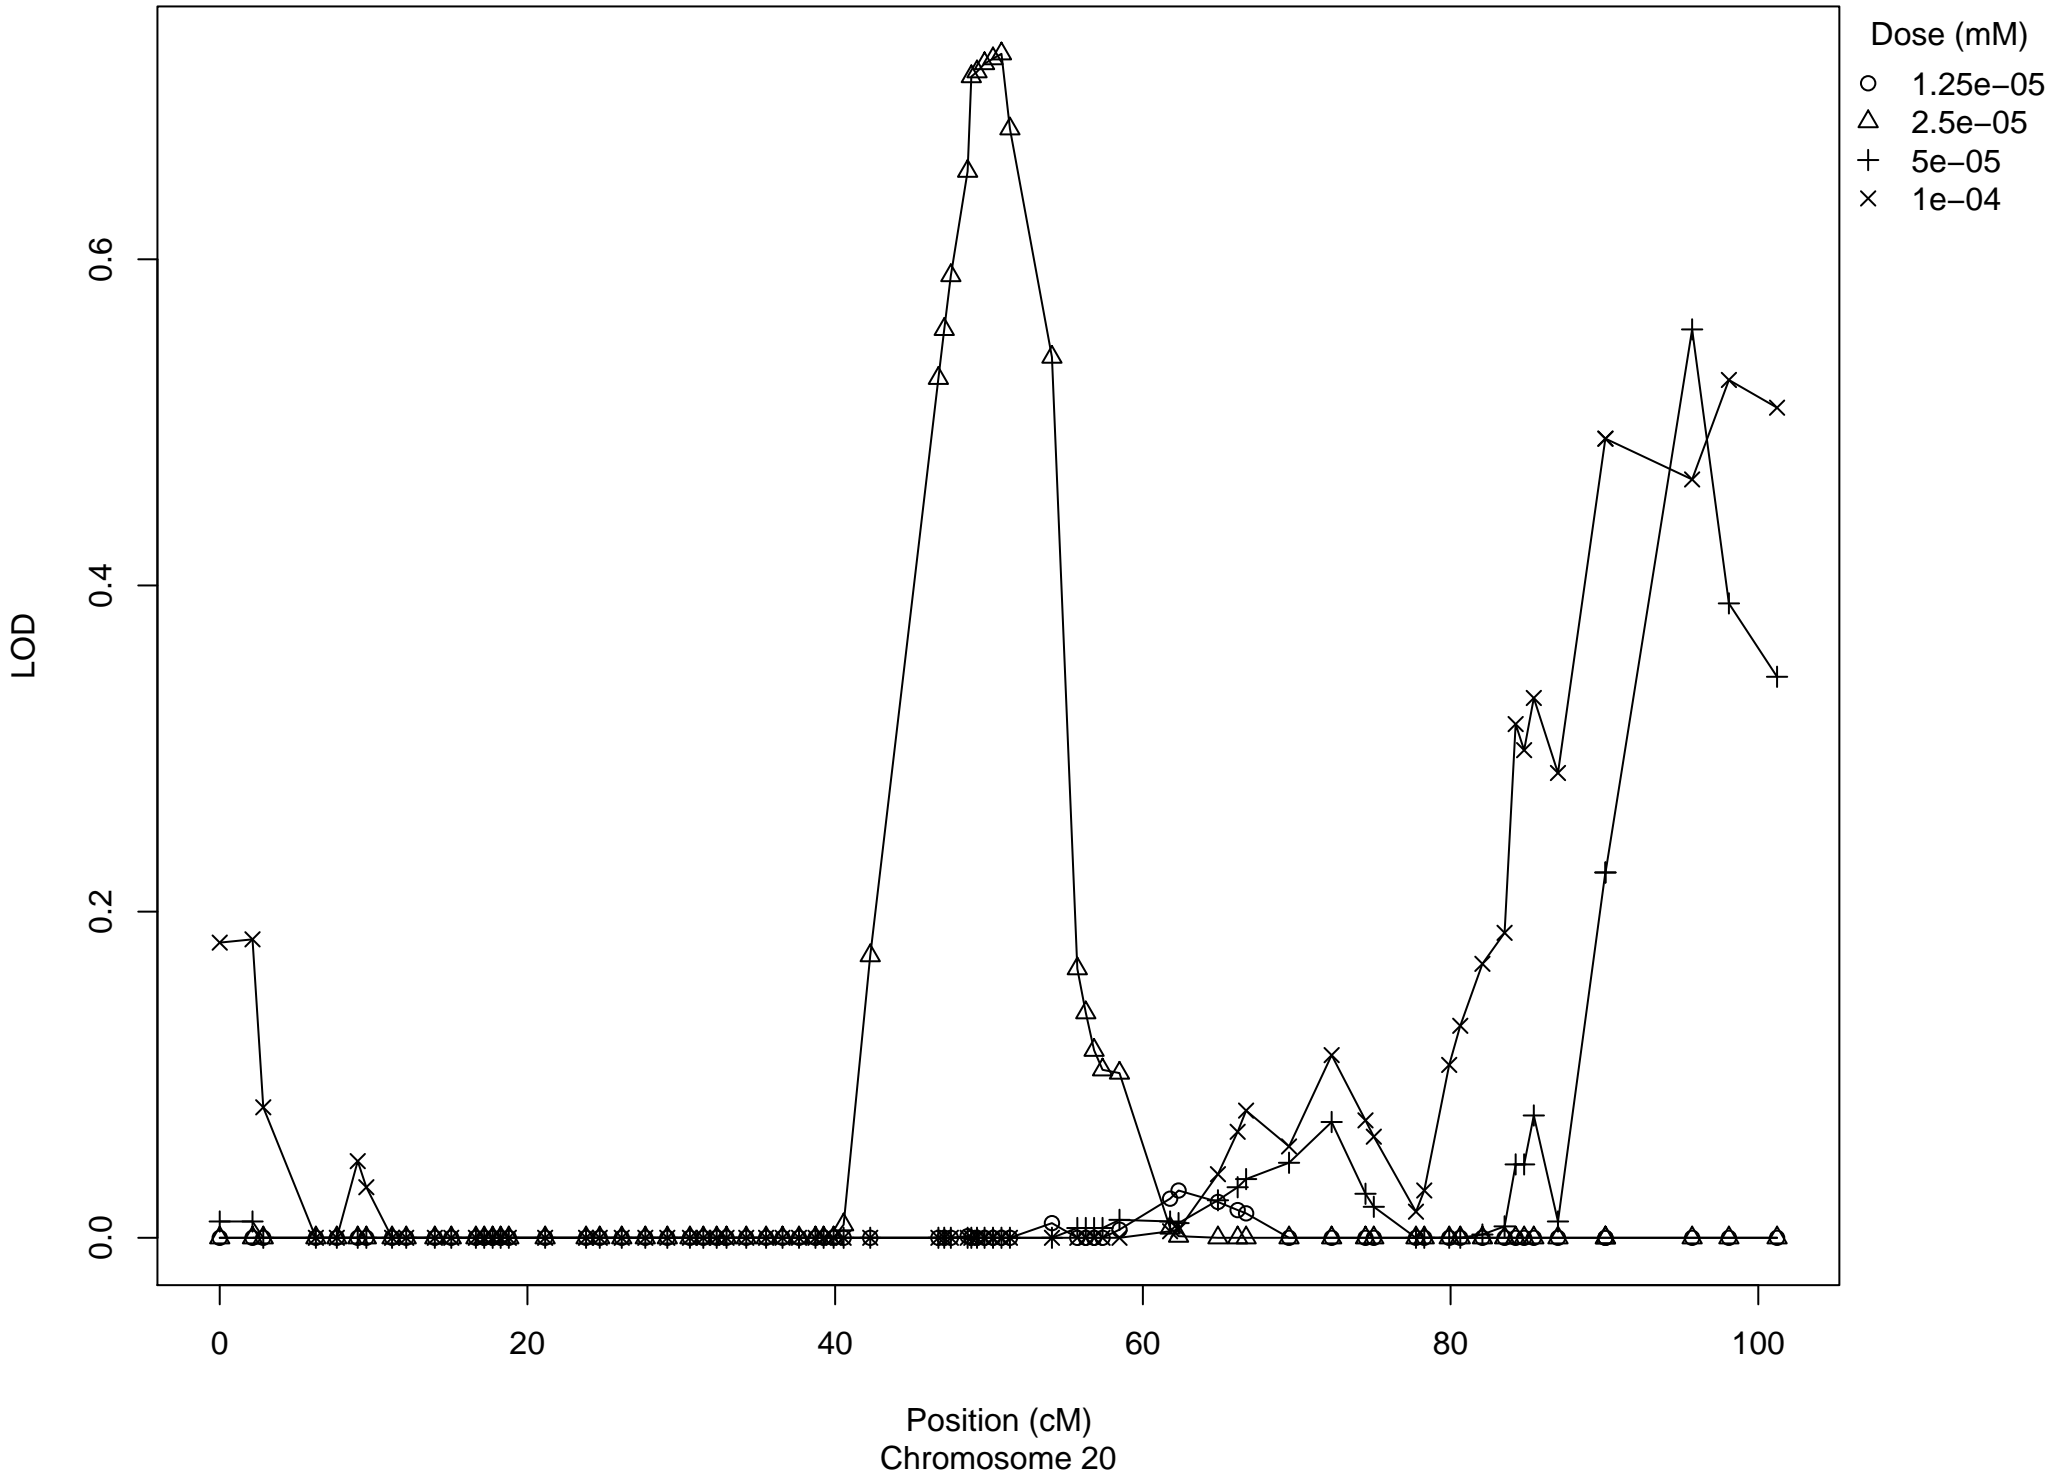



# Daunorubicin hydrochloride (Daun)

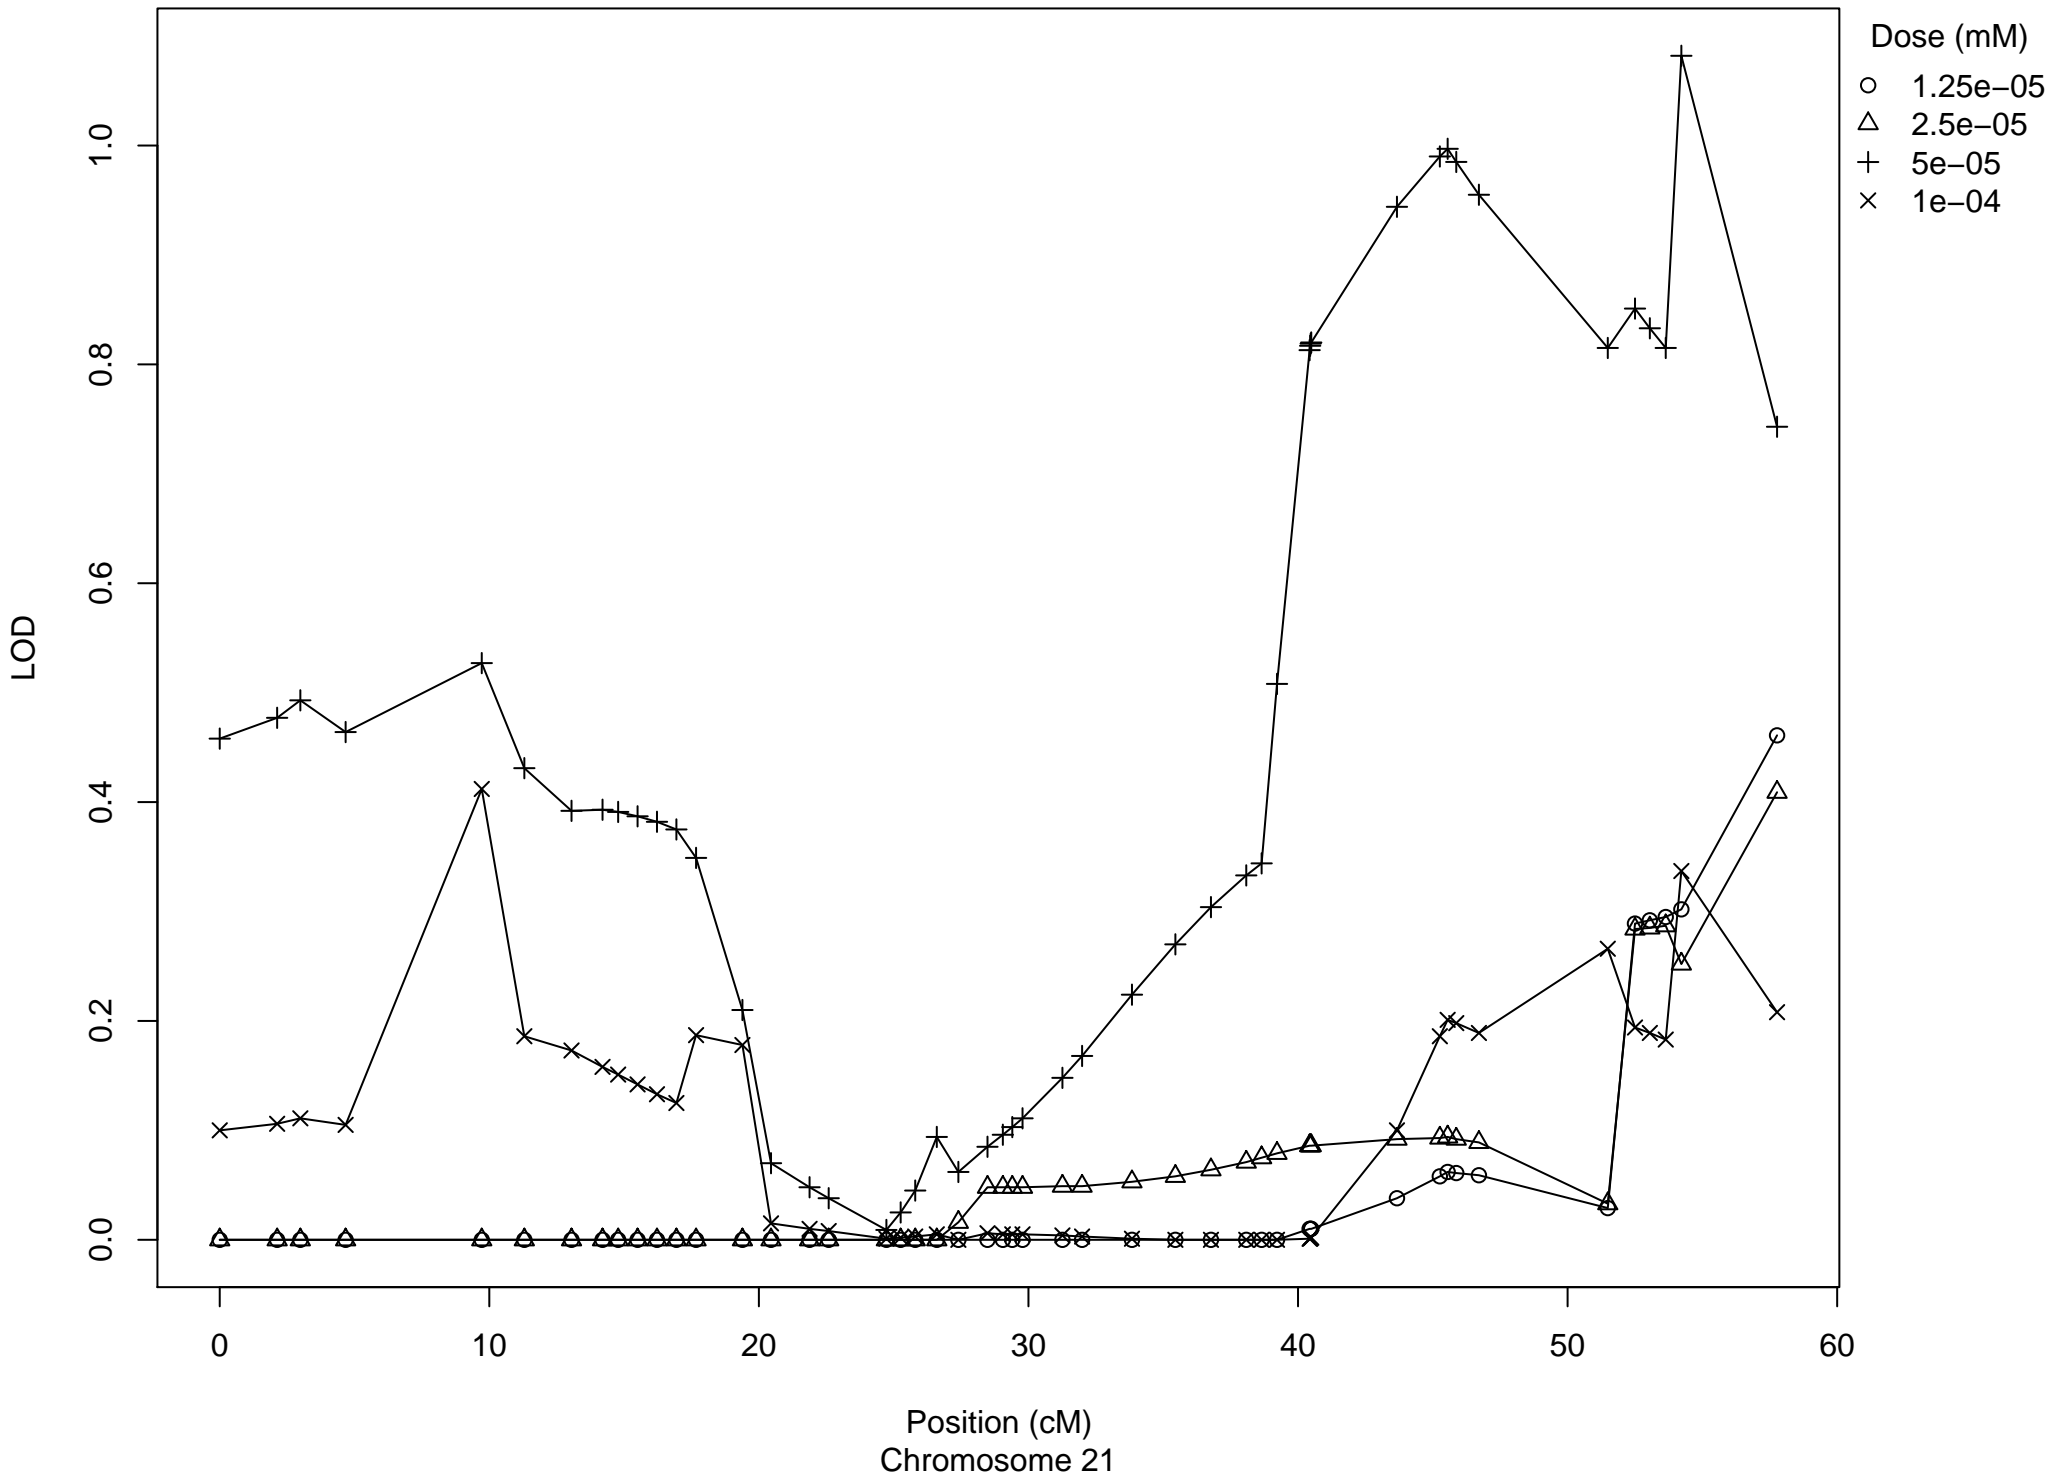

# Daunorubicin hydrochloride (Daun)

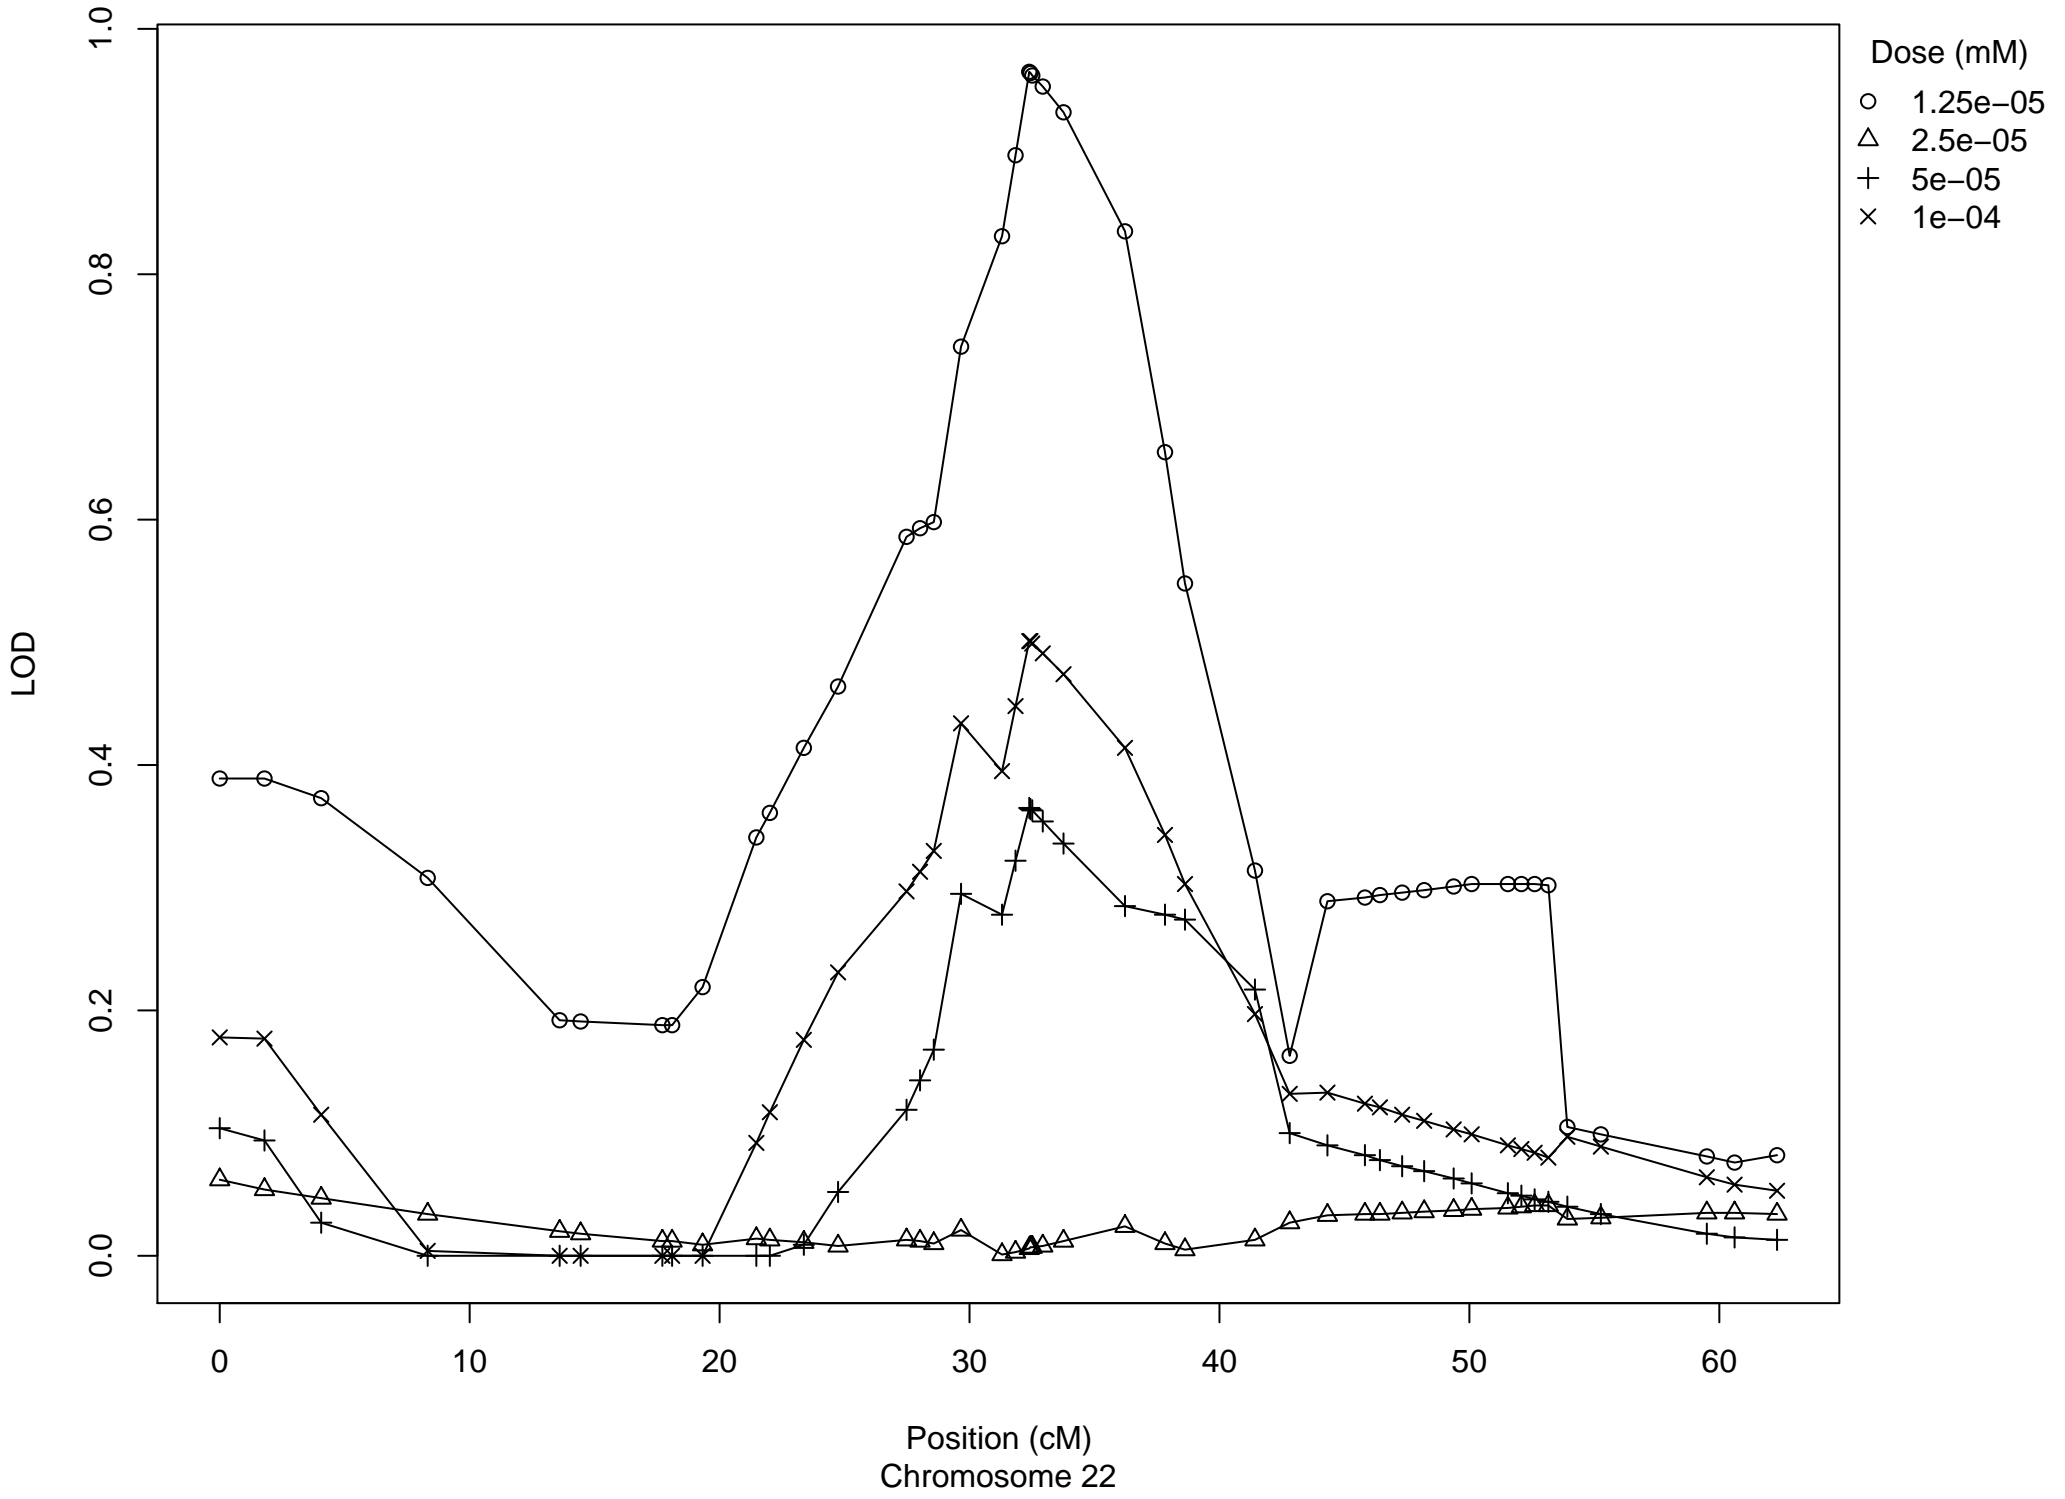

# Docetaxel (Doc)

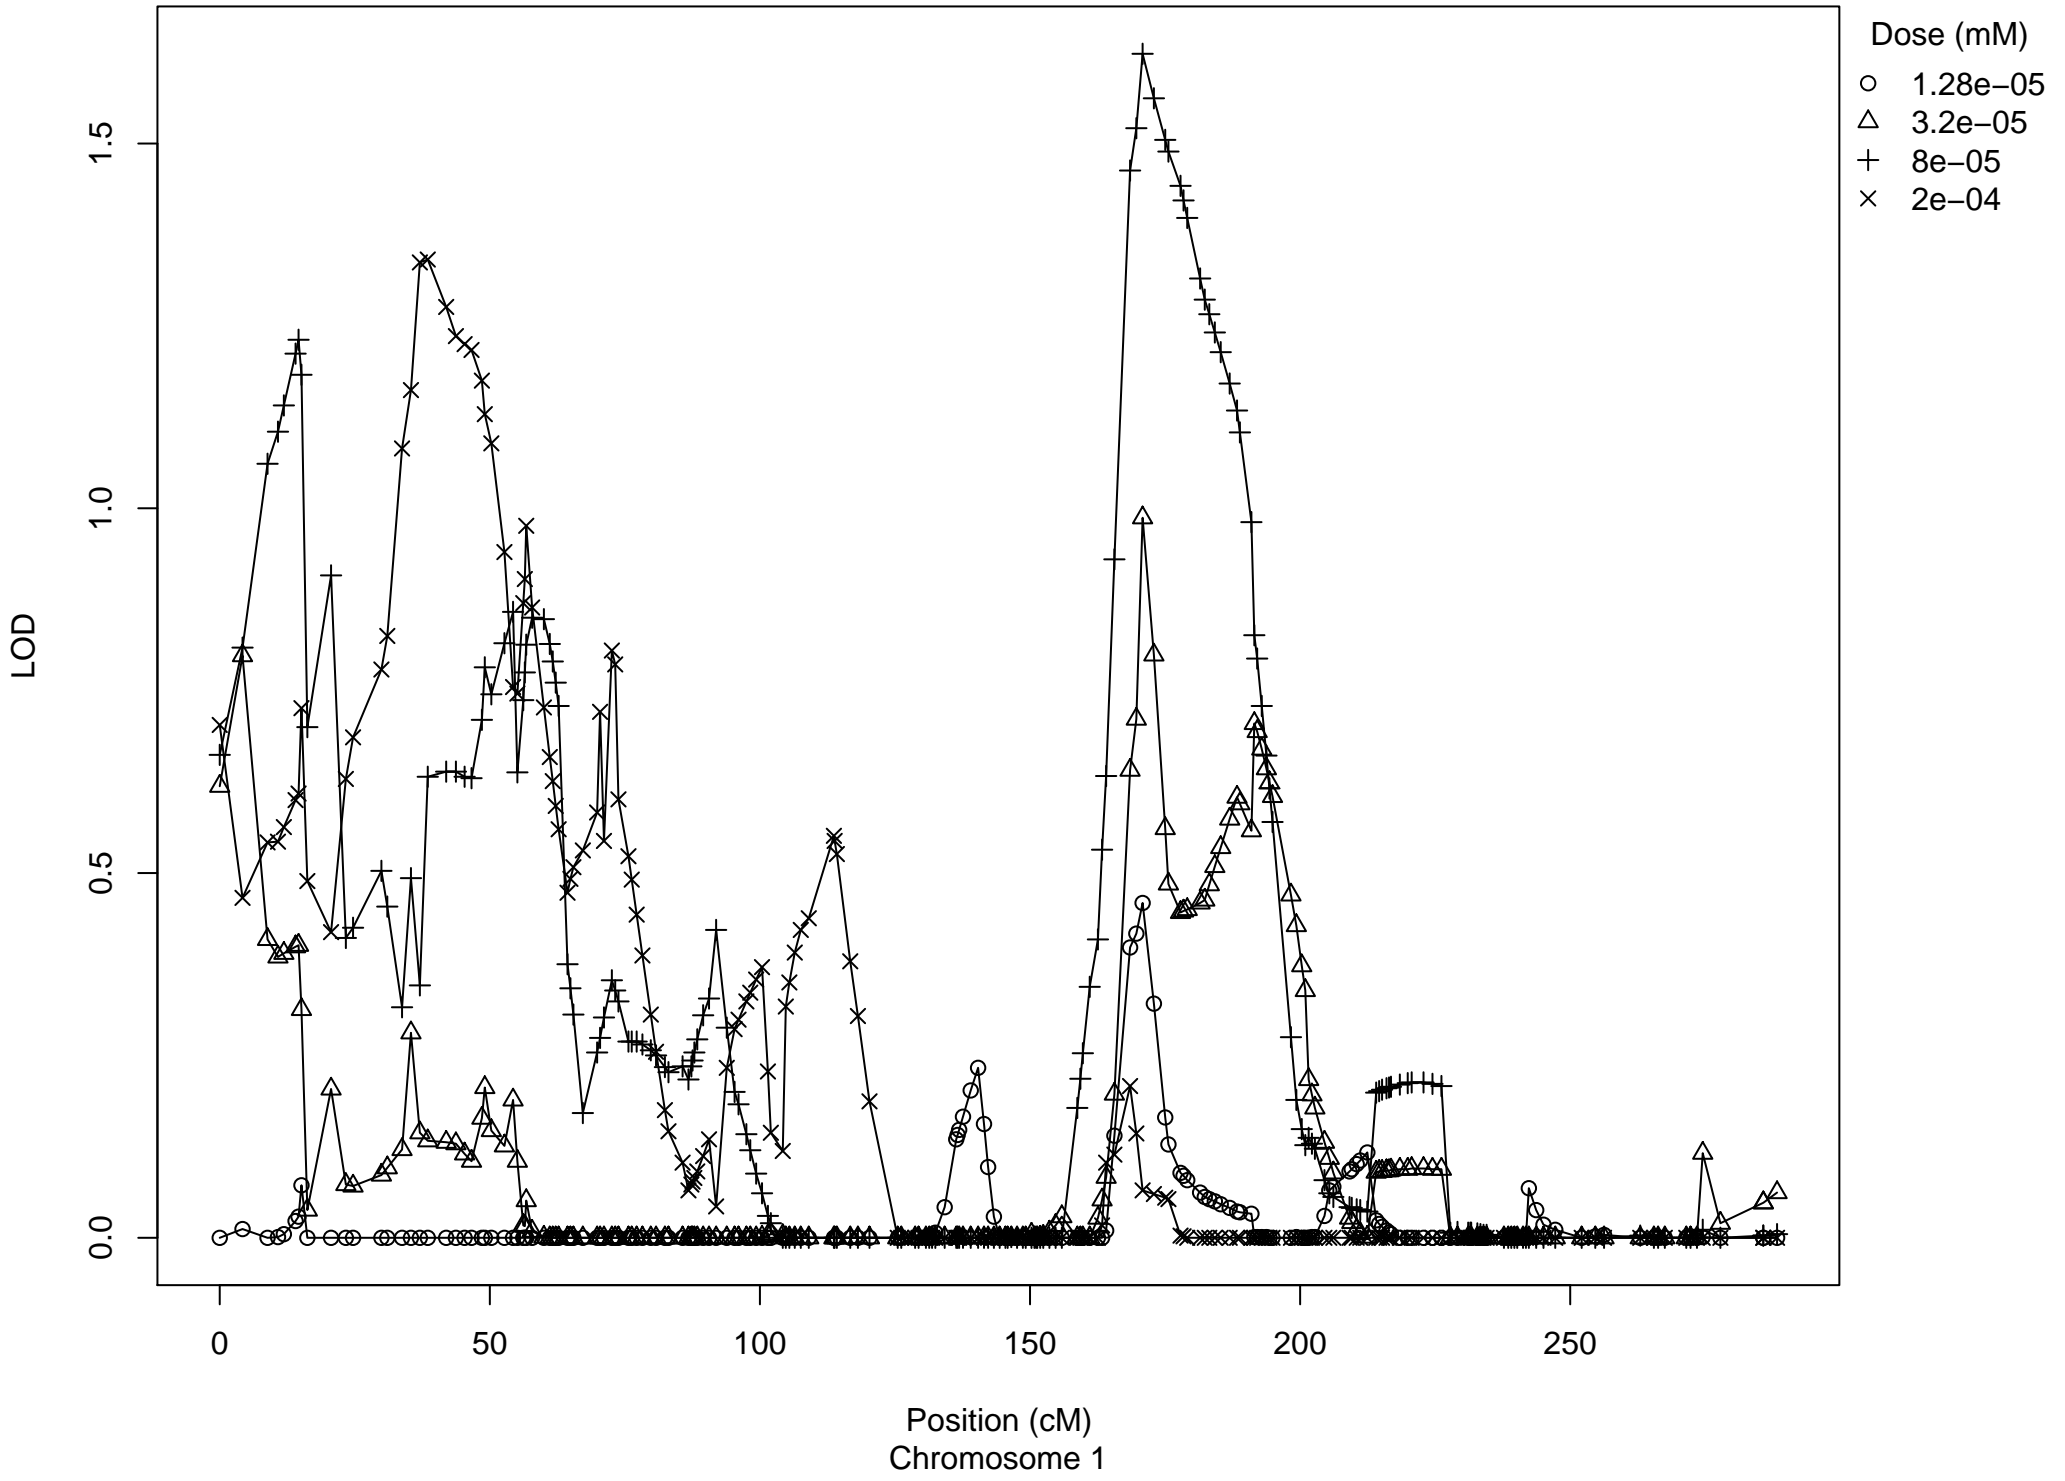

# Docetaxel (Doc)

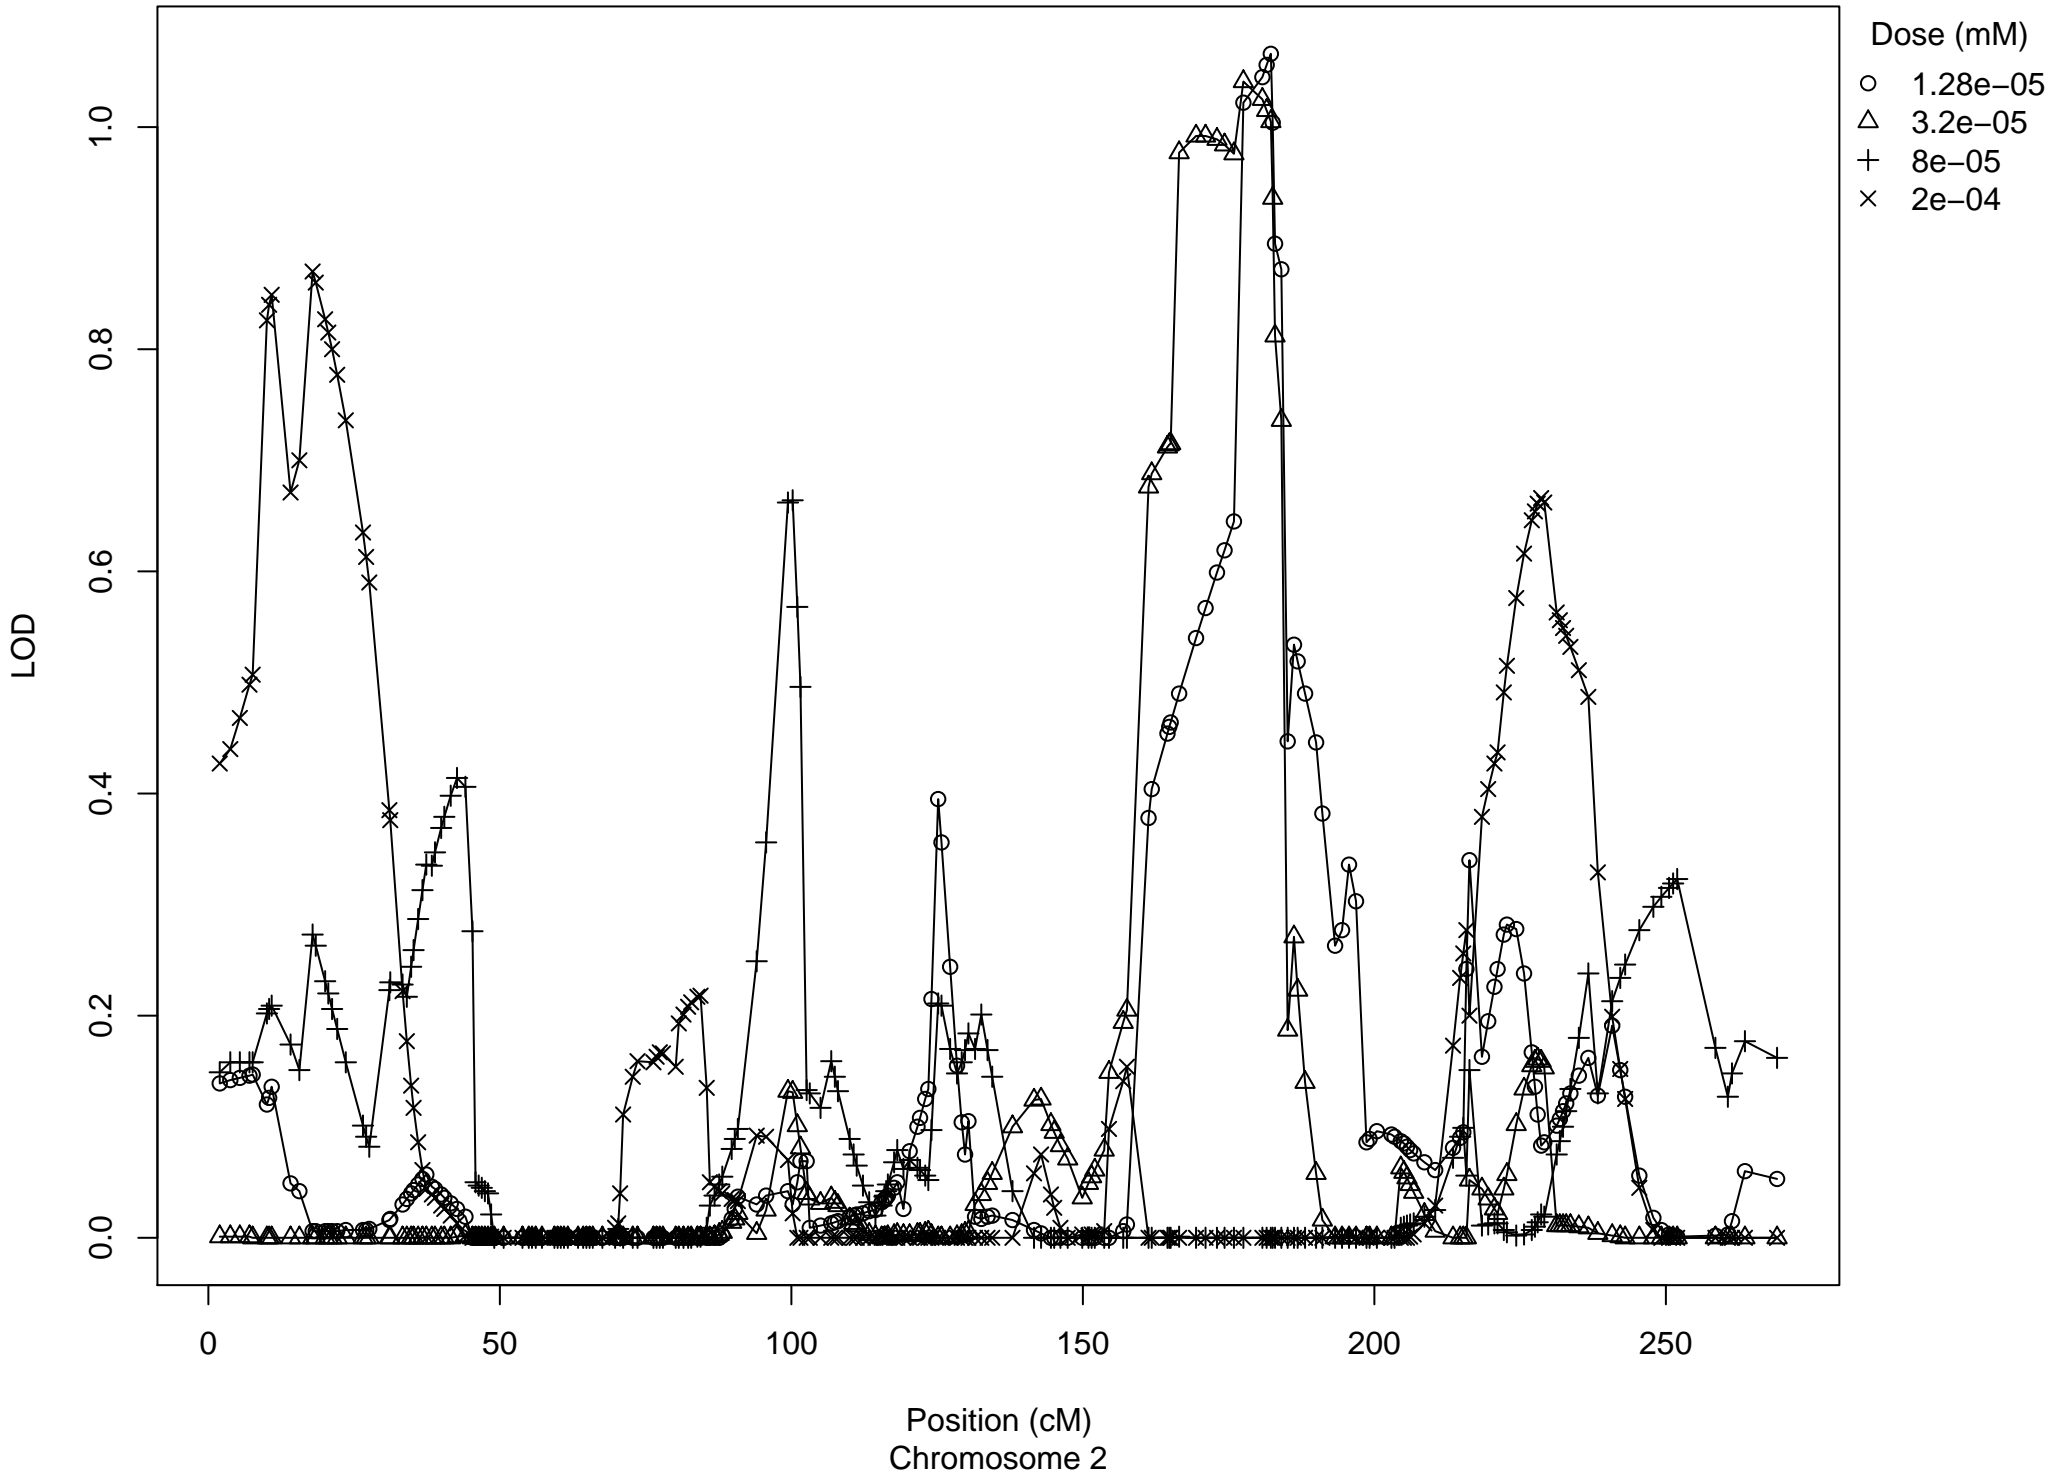

# Docetaxel (Doc)

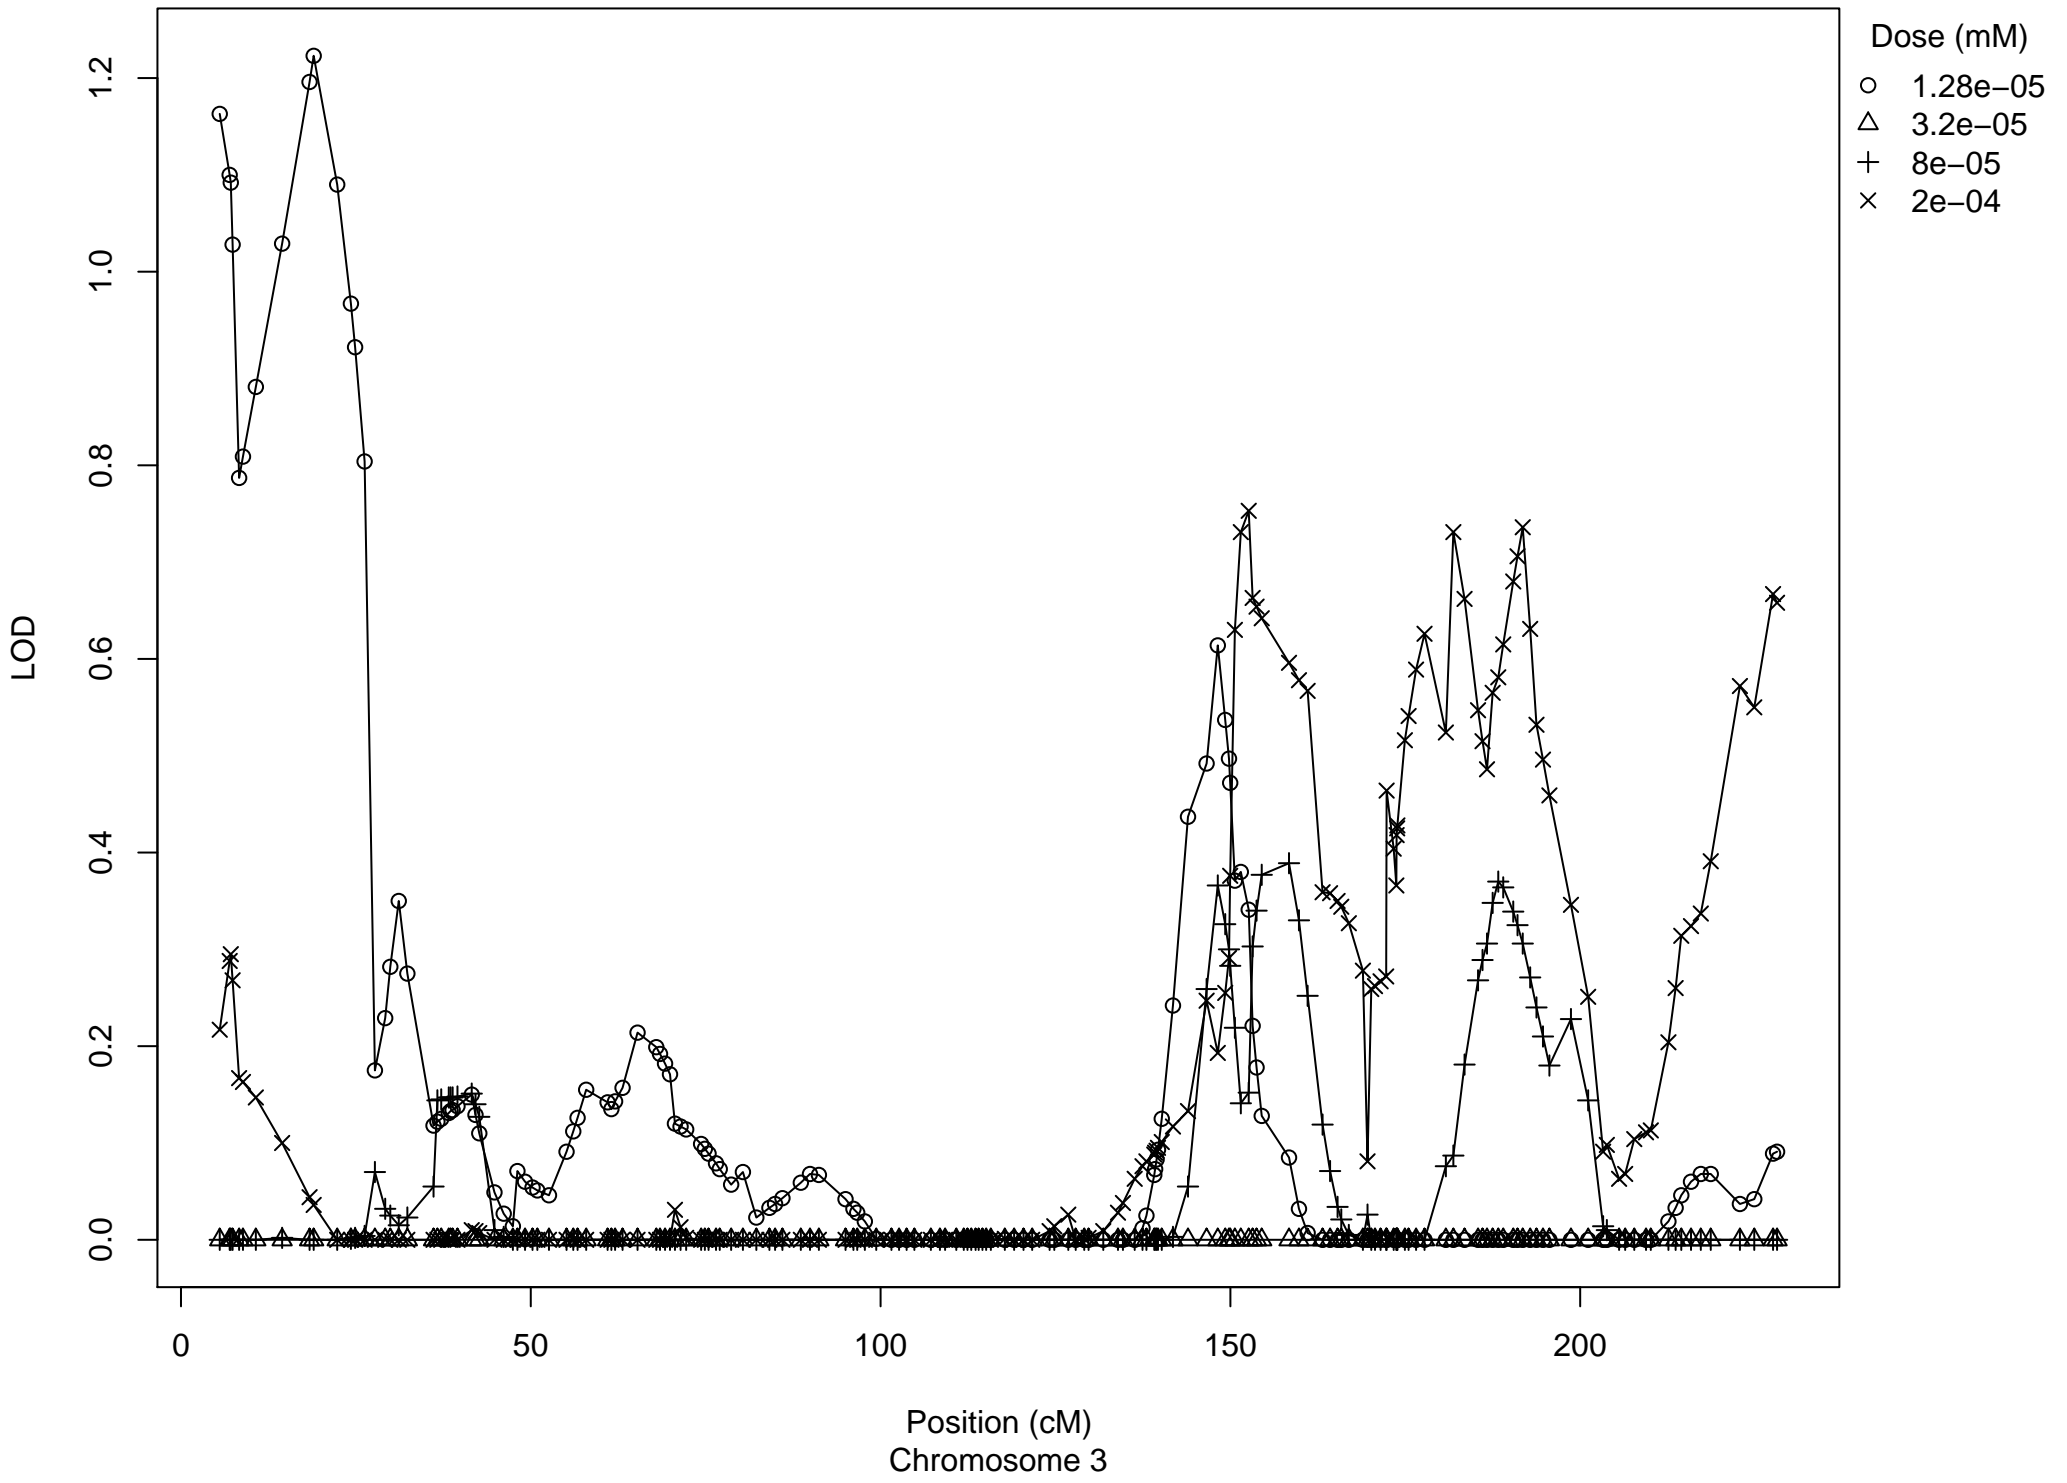

# Docetaxel (Doc)

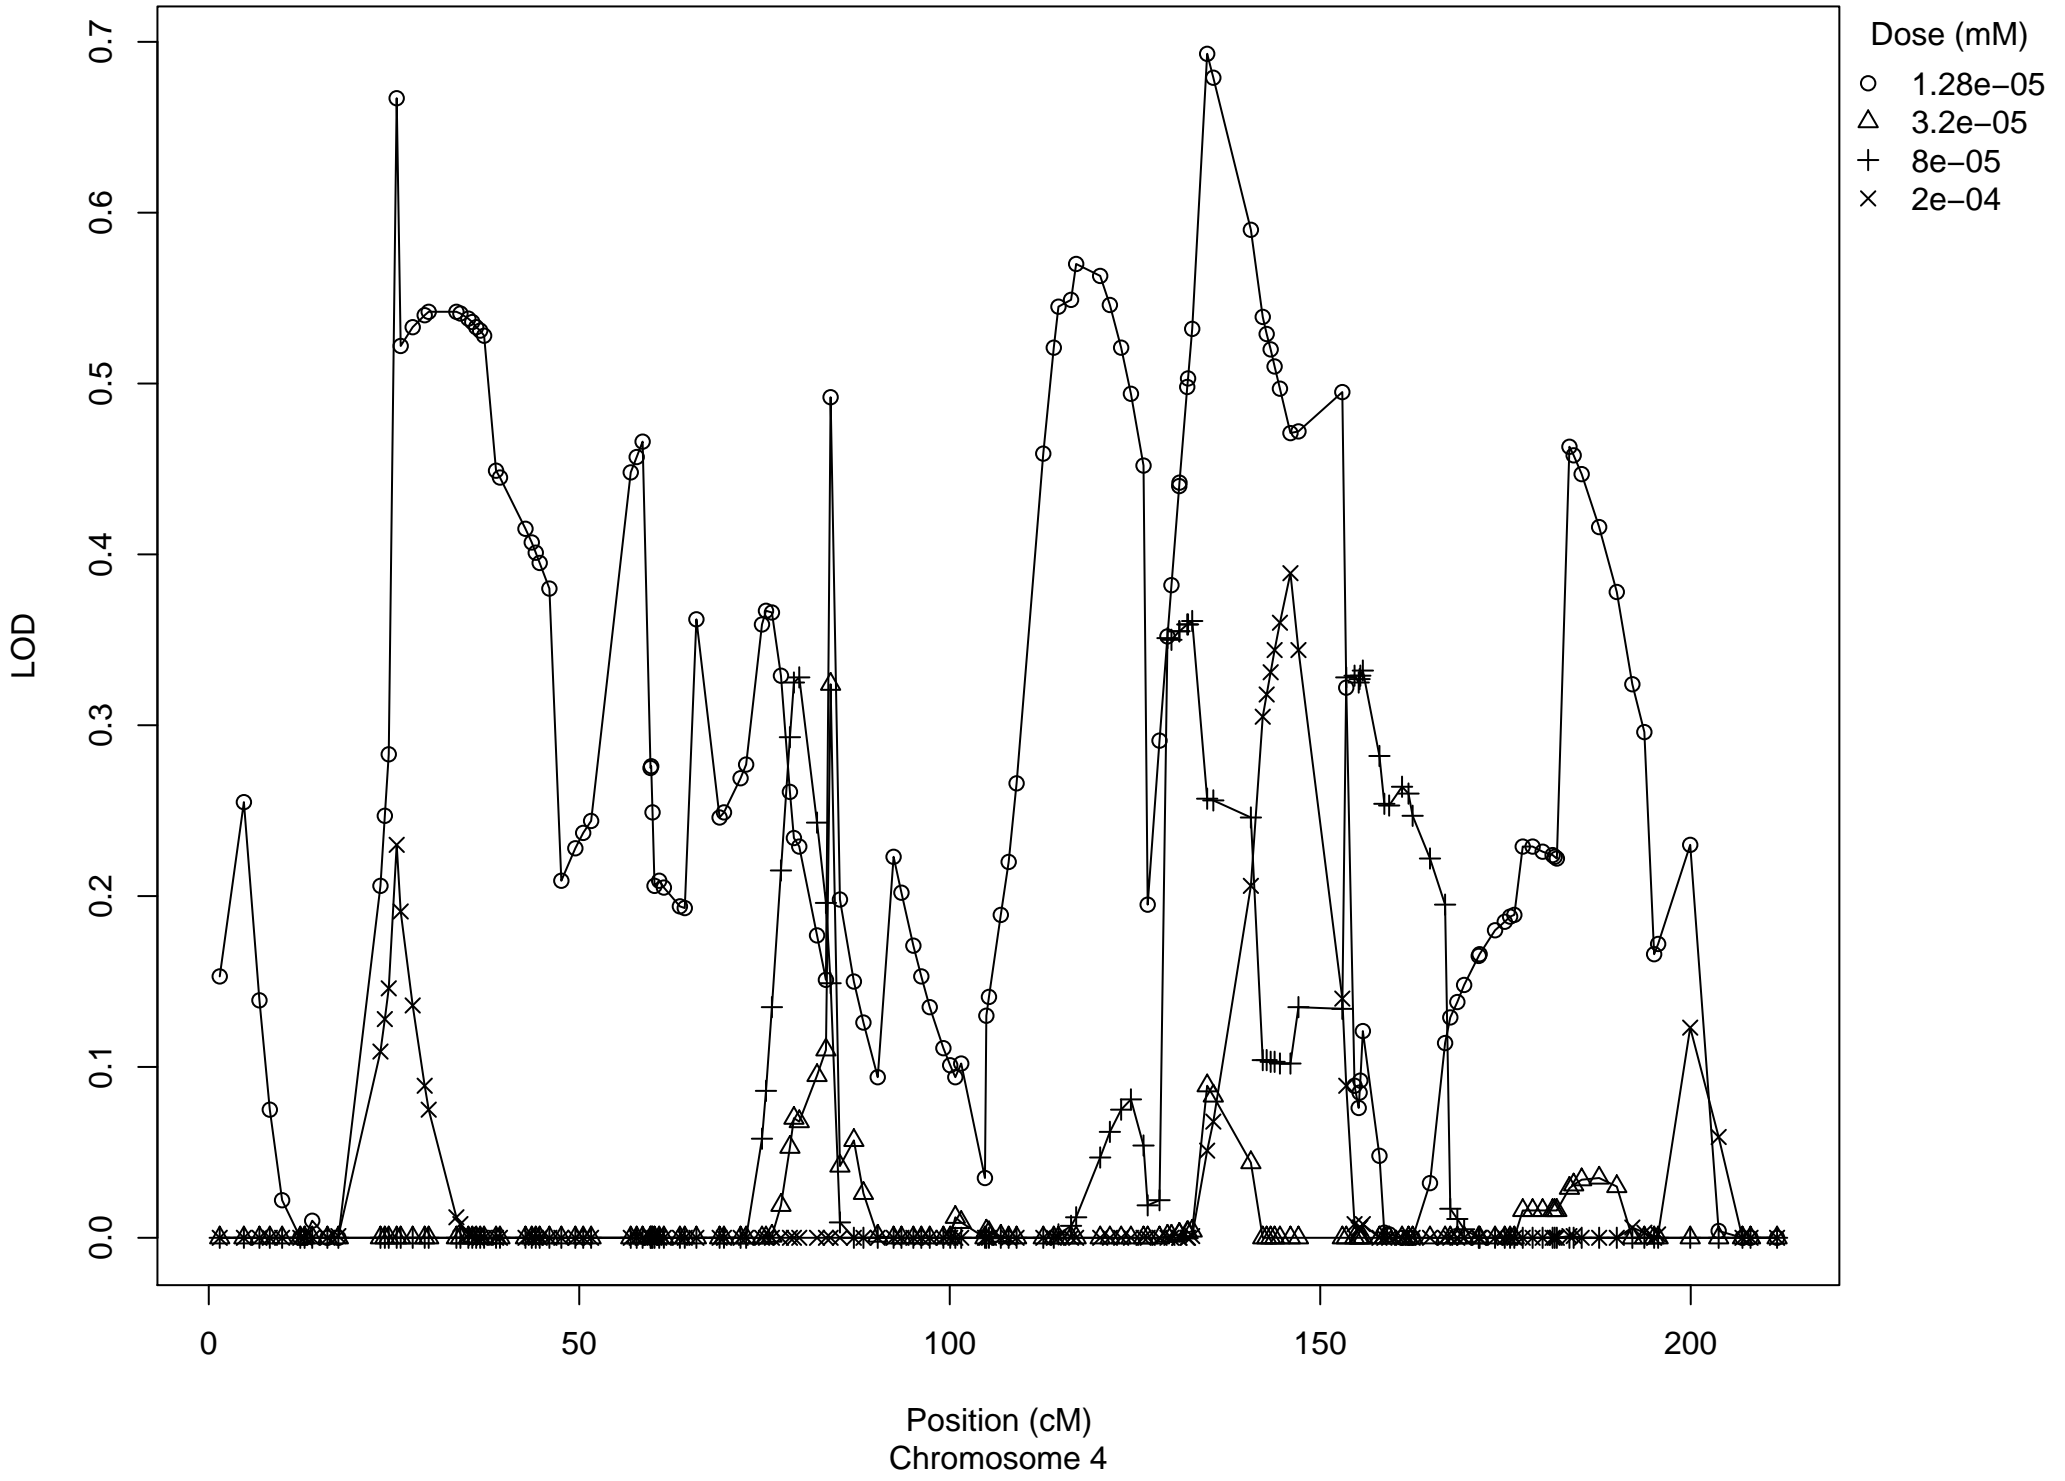

# Docetaxel (Doc)

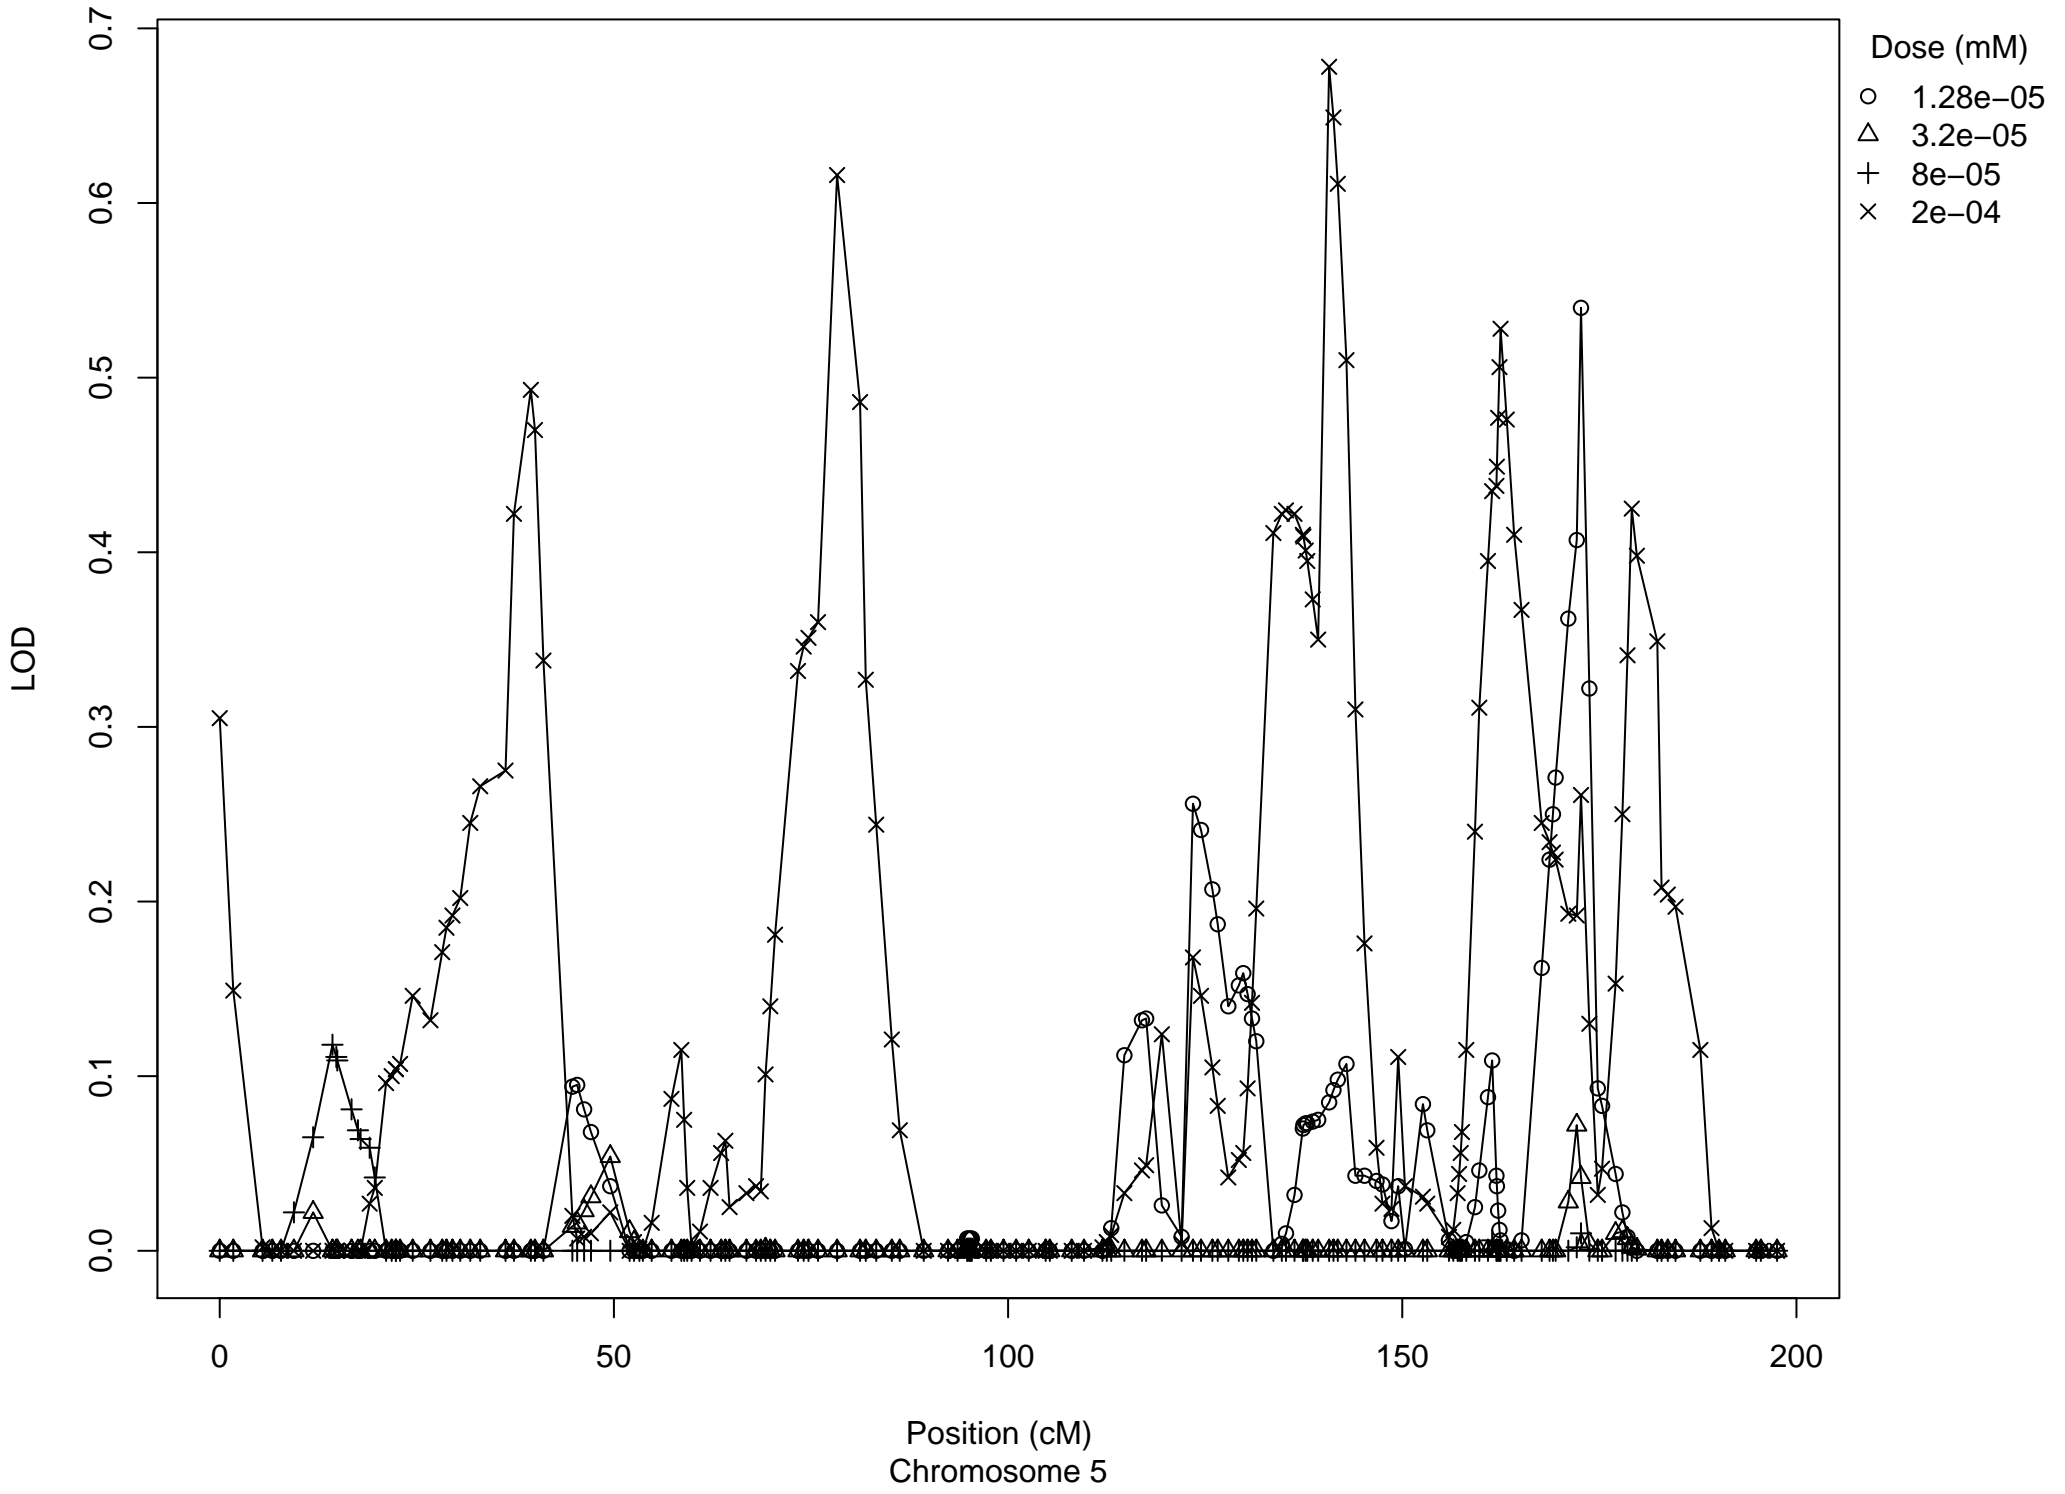

# Docetaxel (Doc)

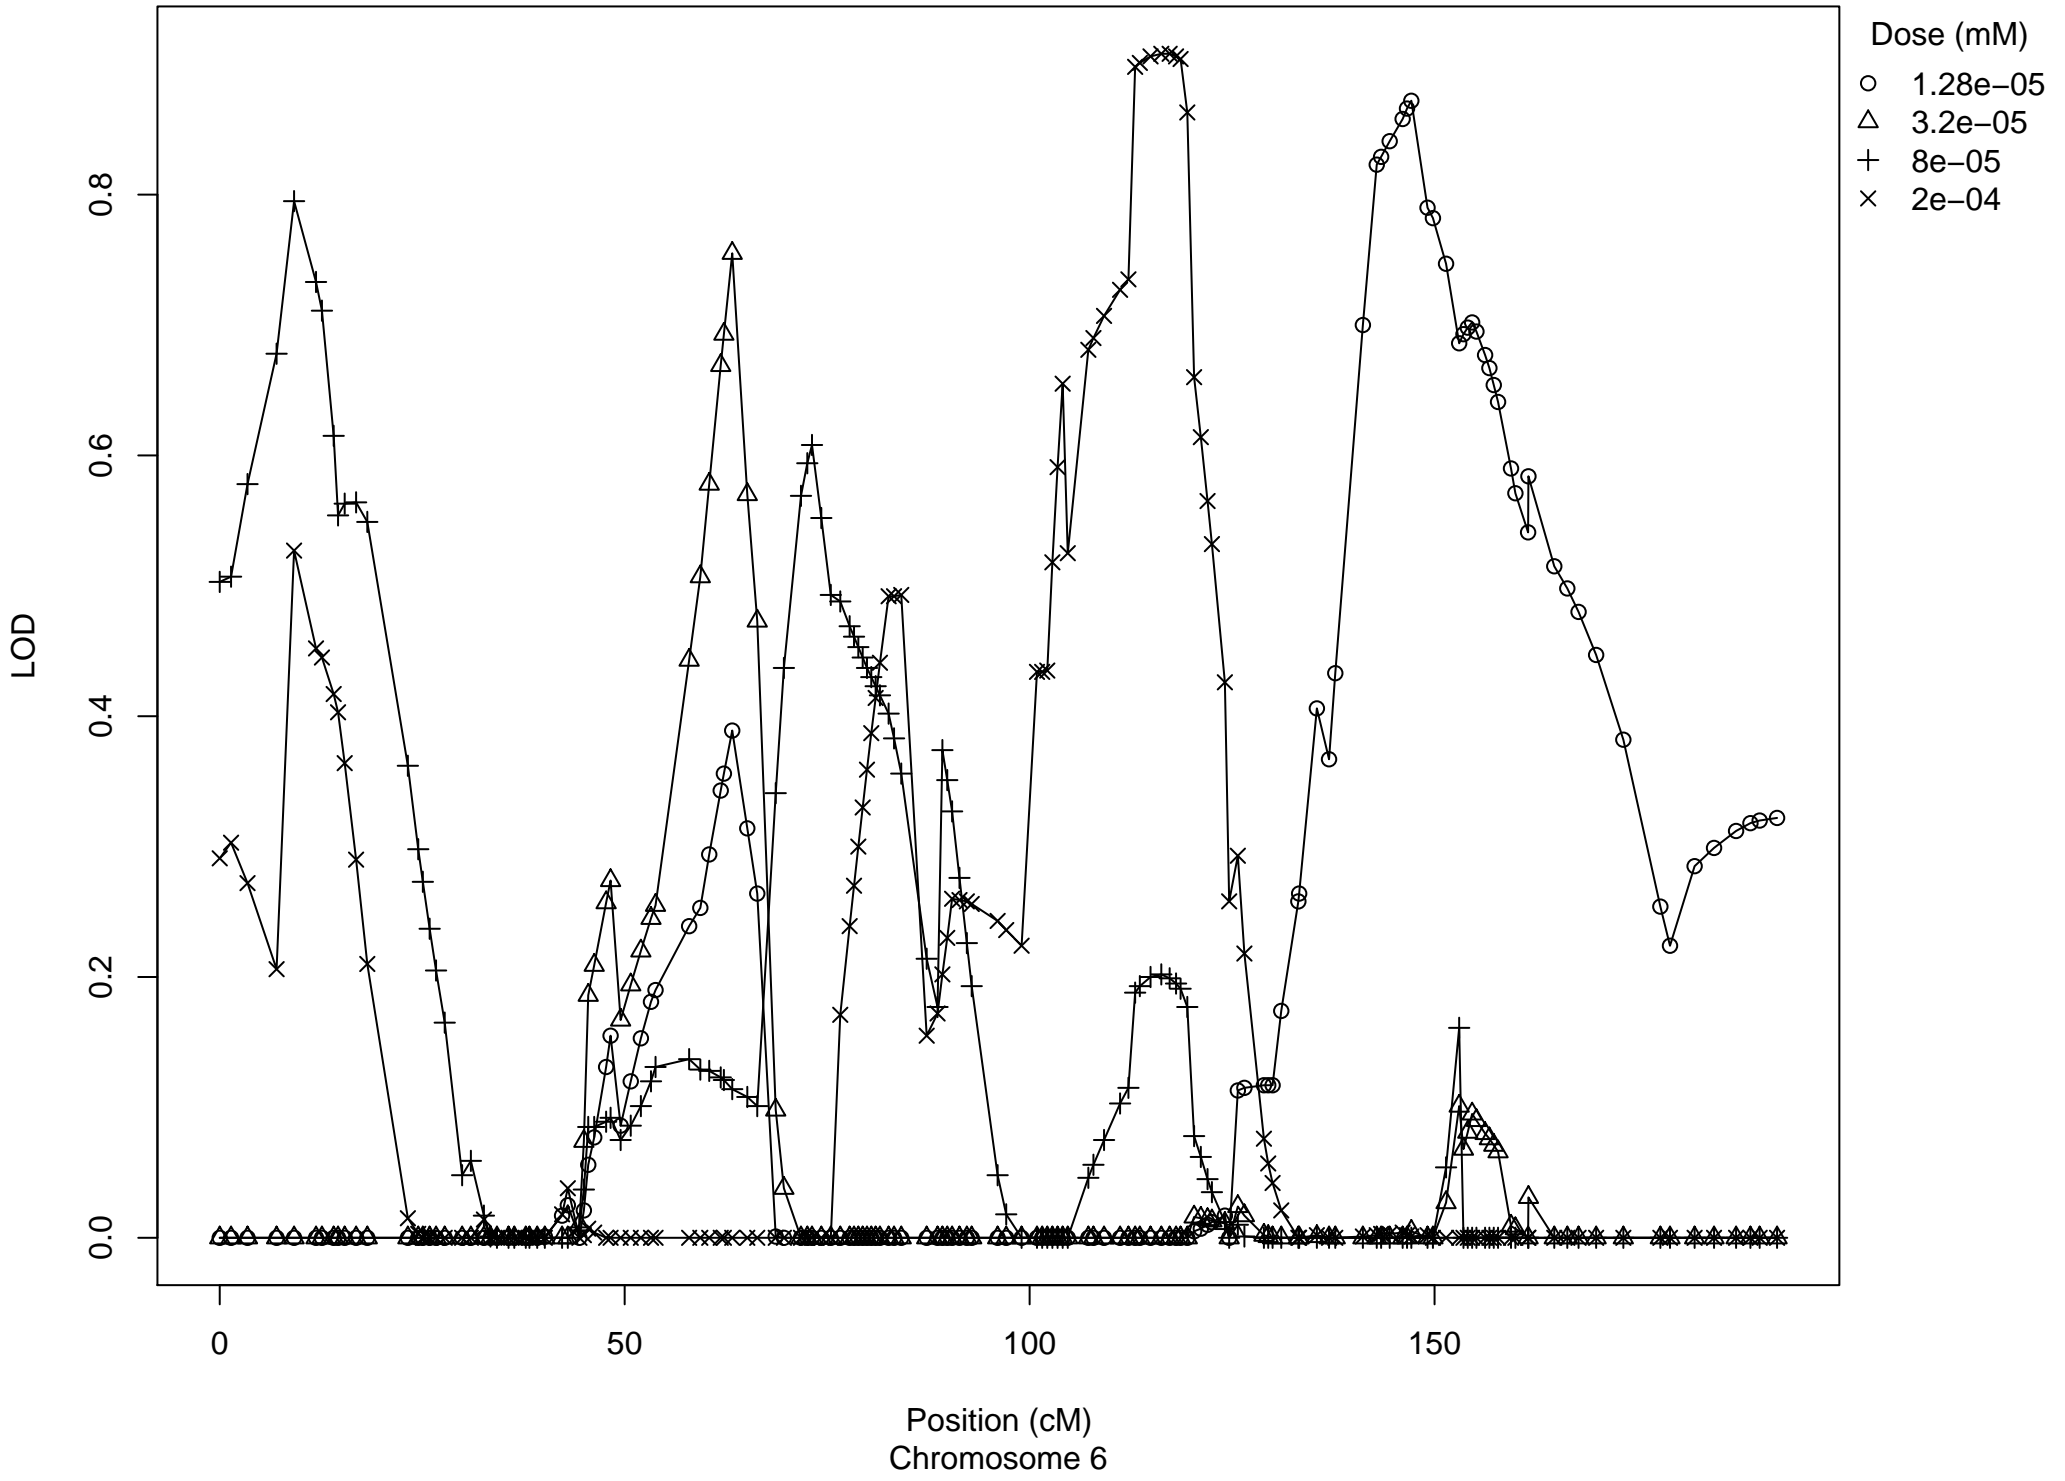



# Docetaxel (Doc)

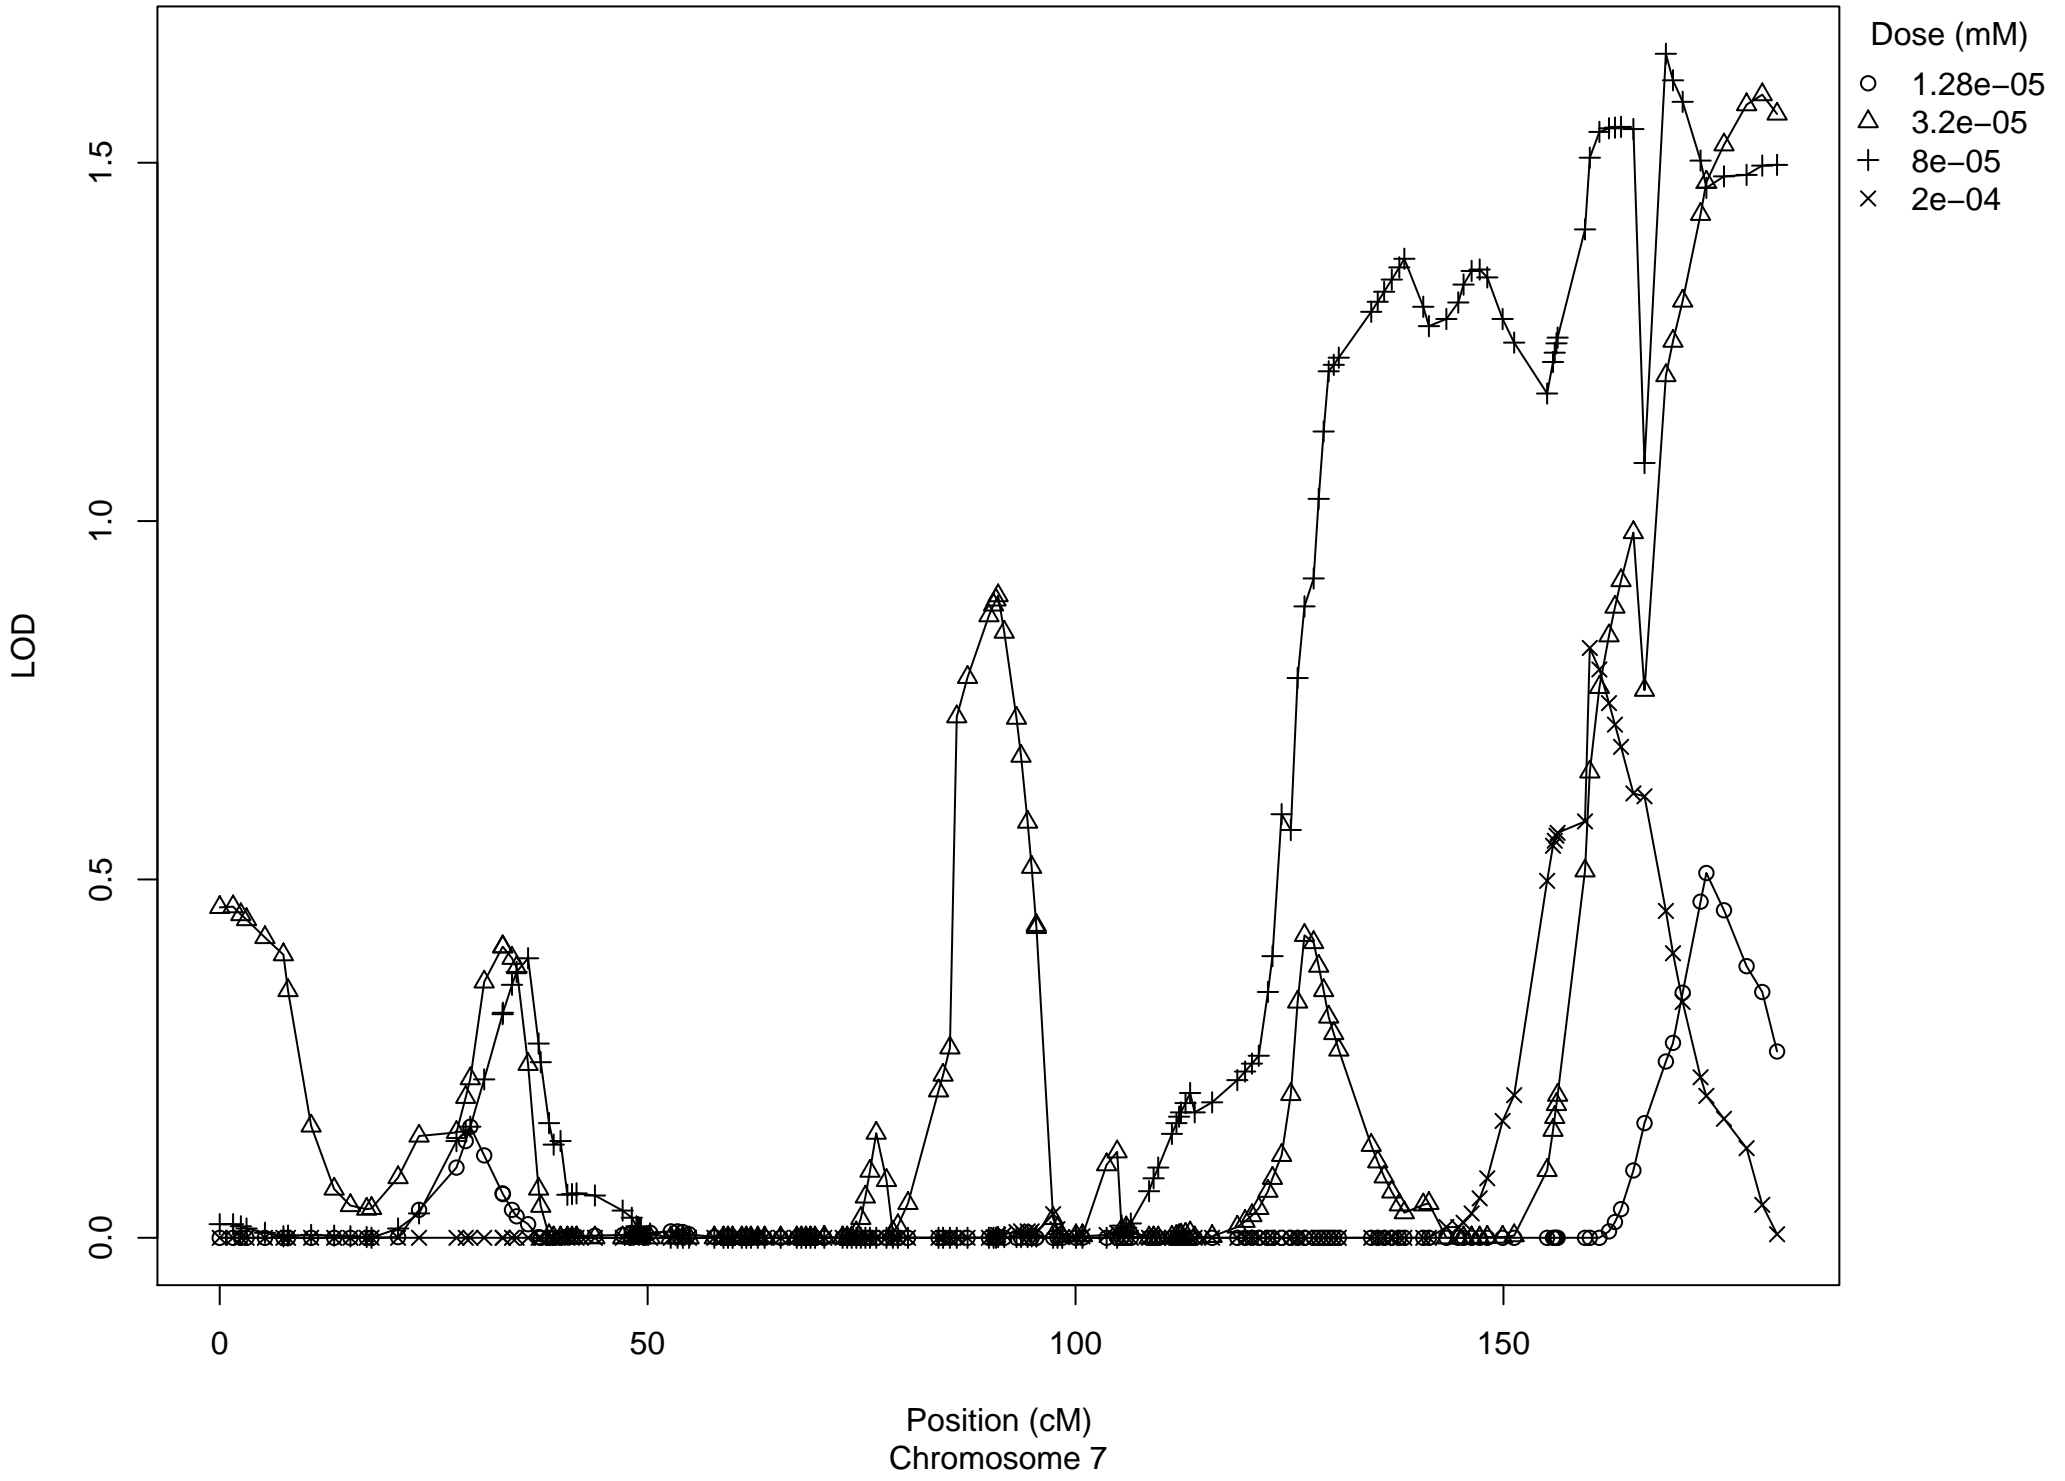

# Docetaxel (Doc)

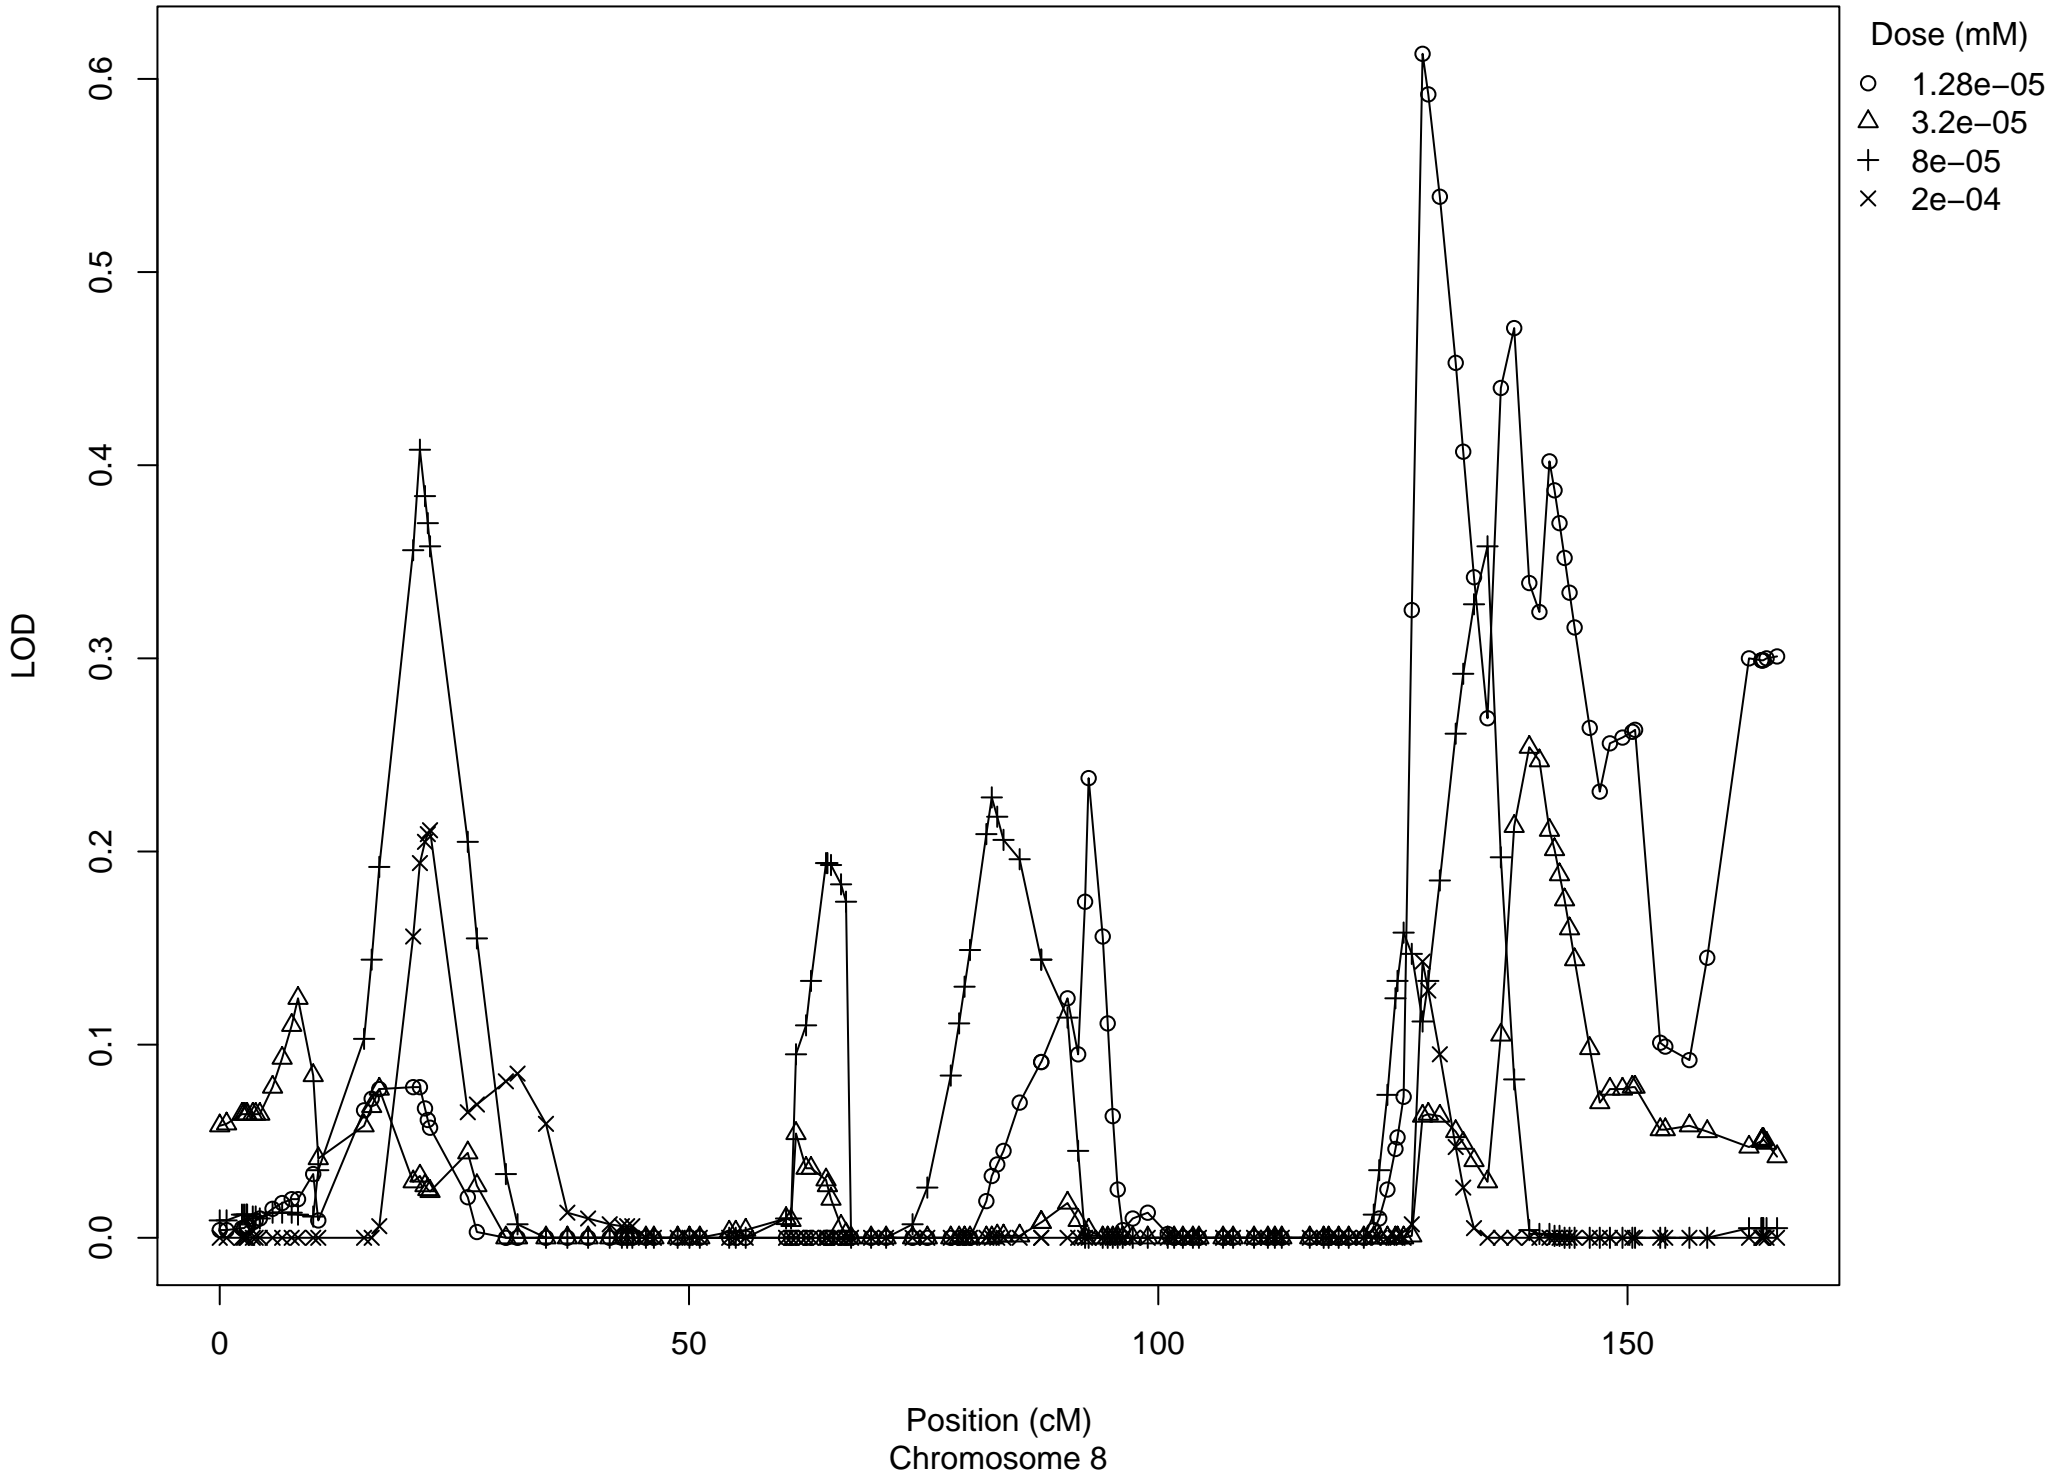

# Docetaxel (Doc)

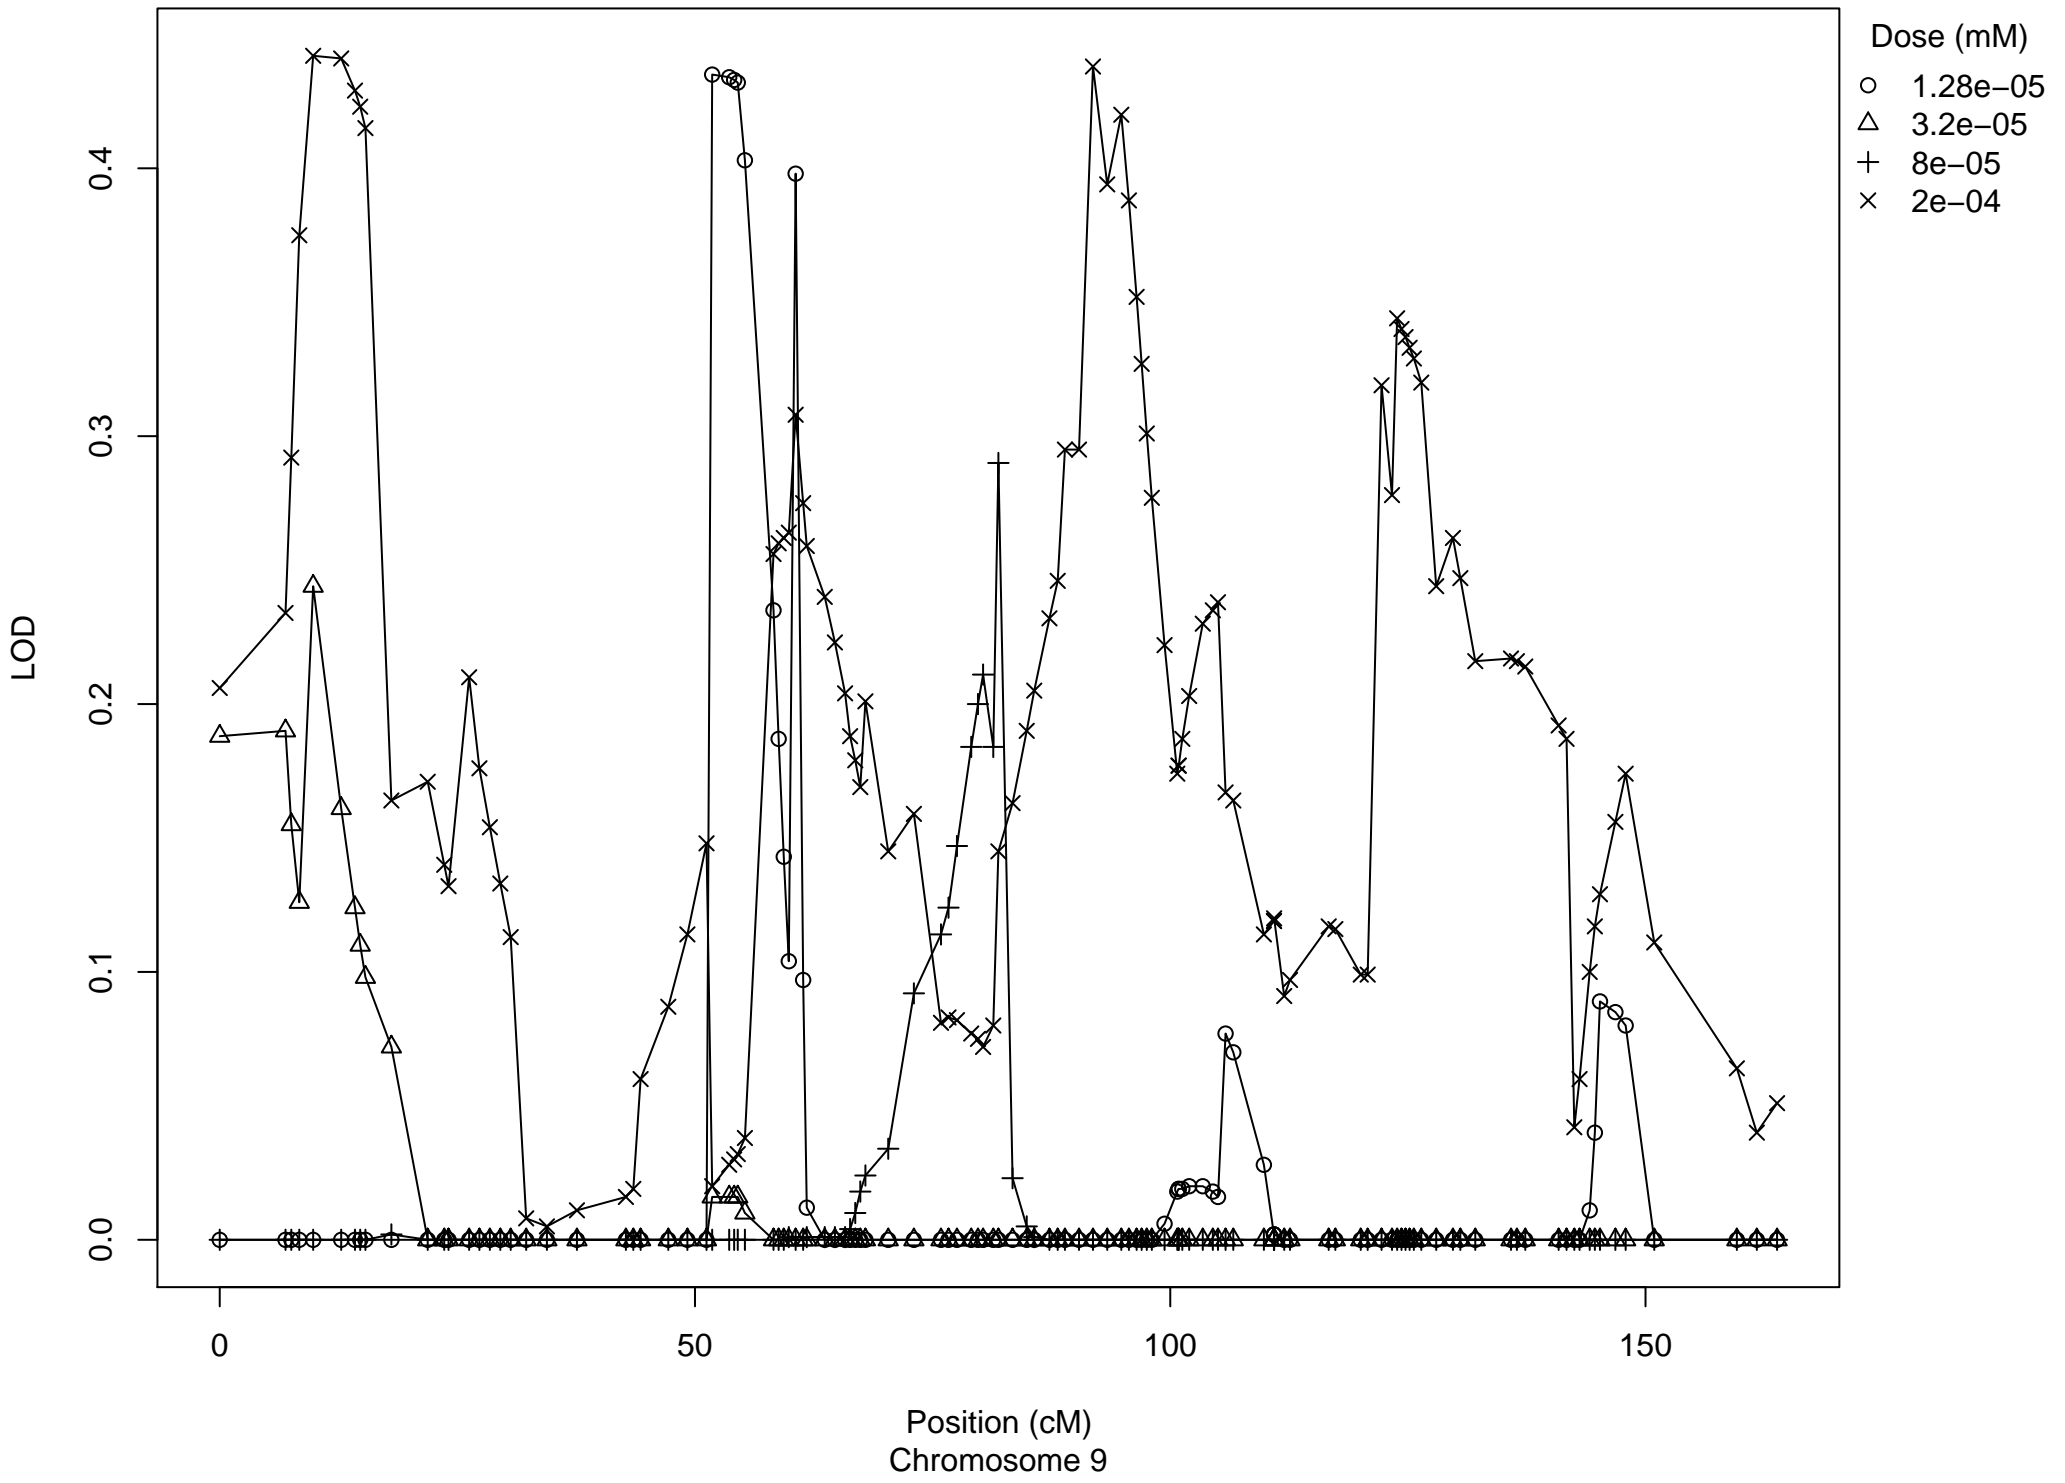

# Docetaxel (Doc)

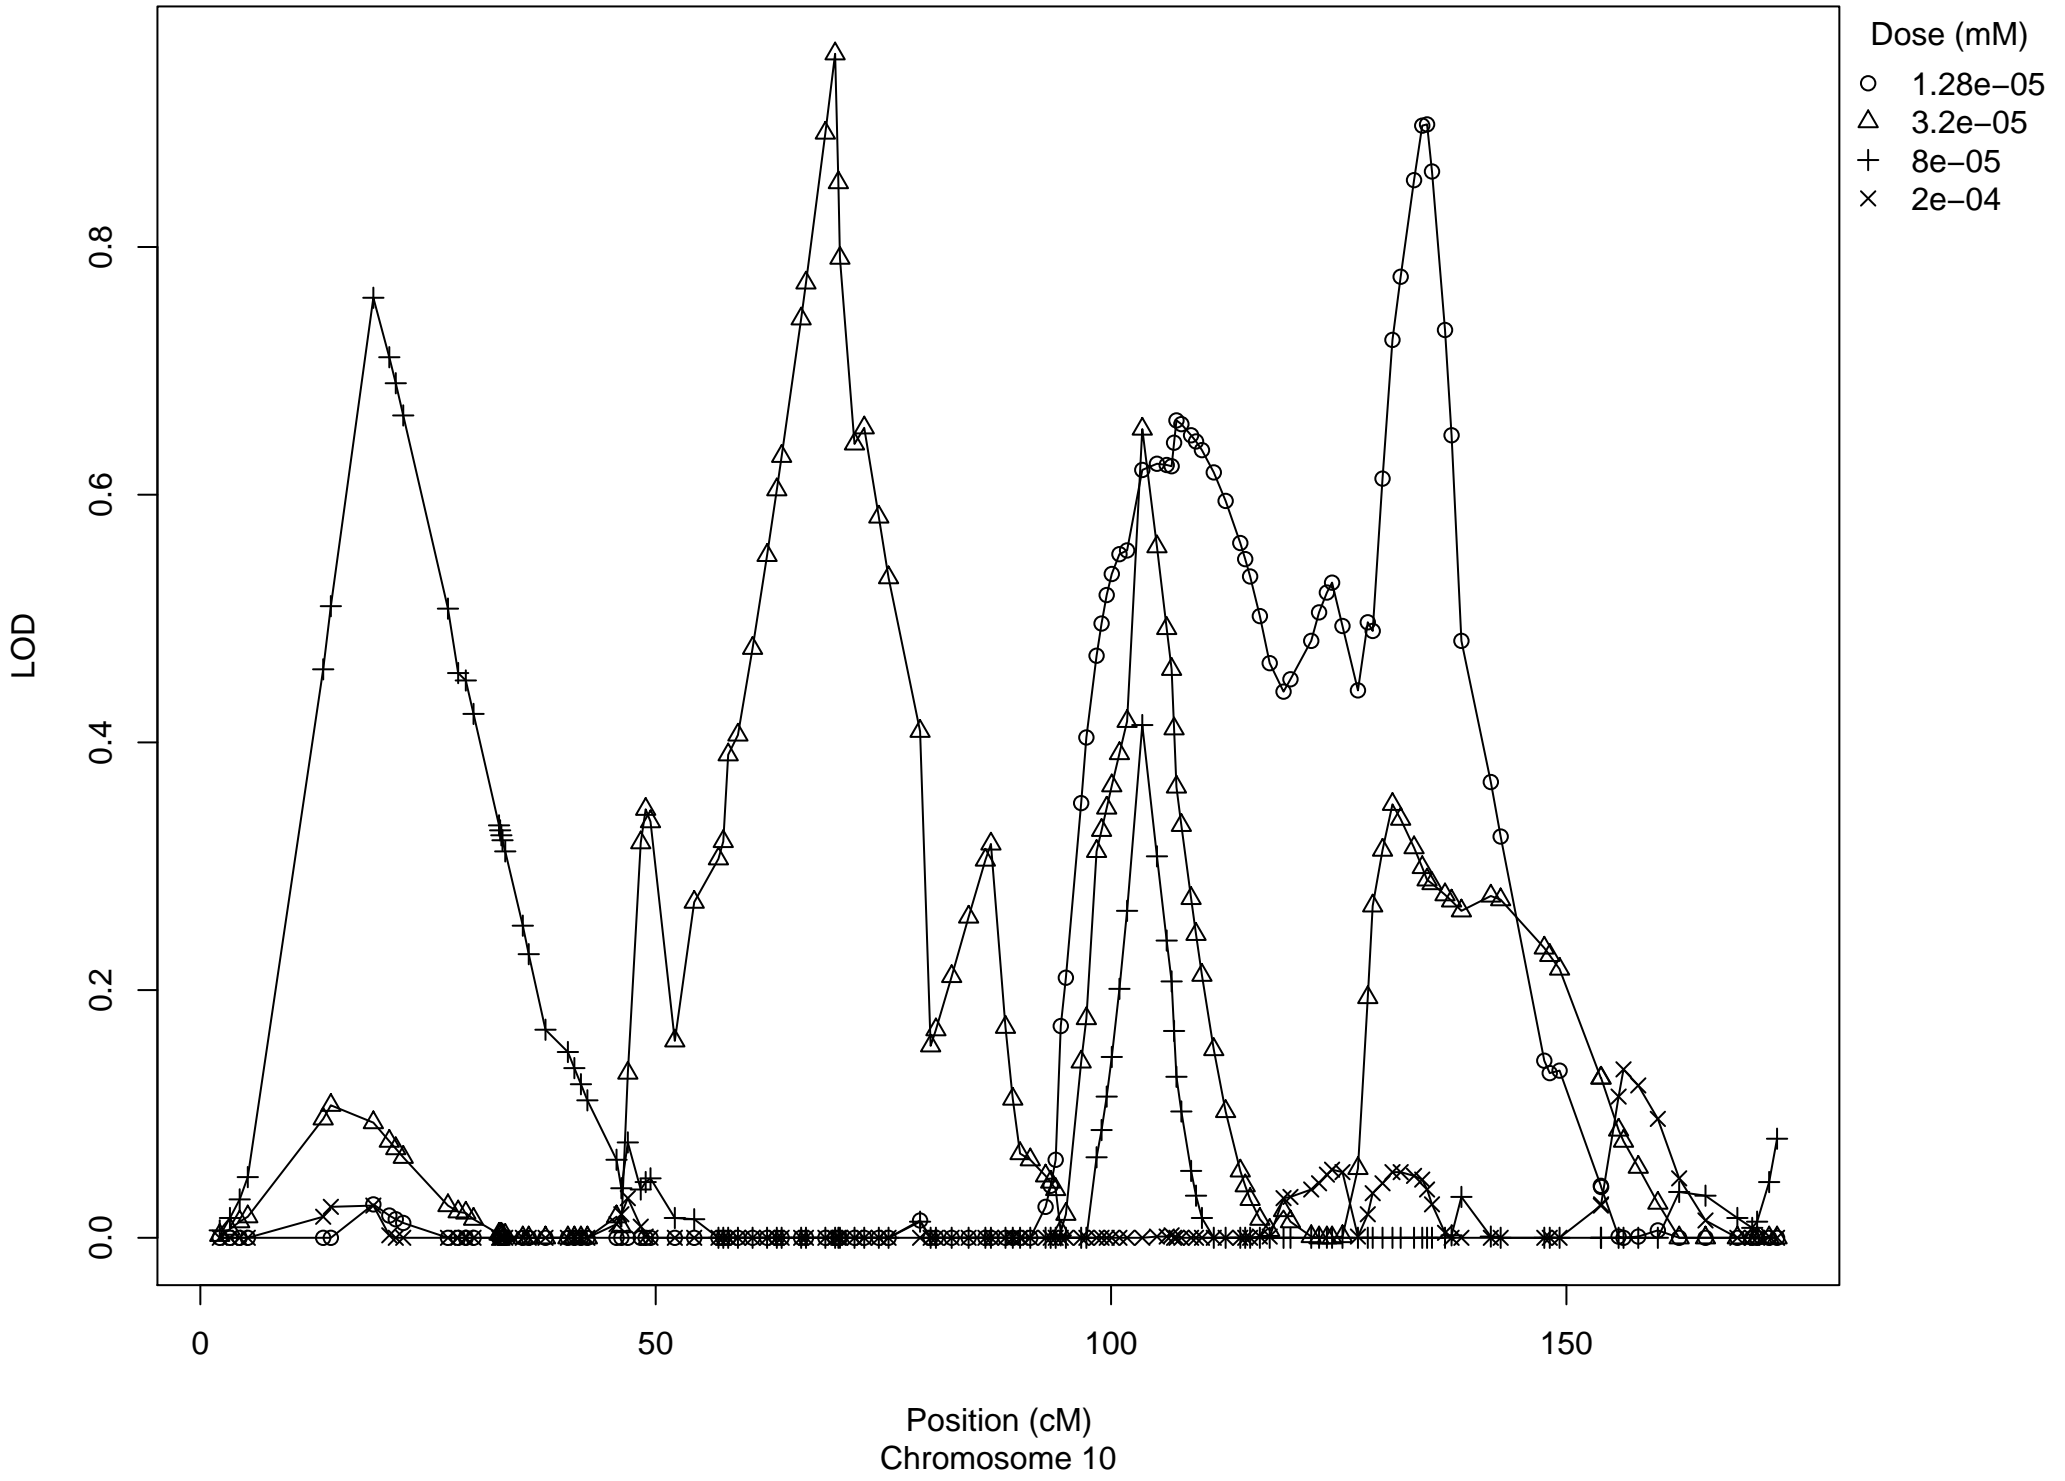

# Docetaxel (Doc)

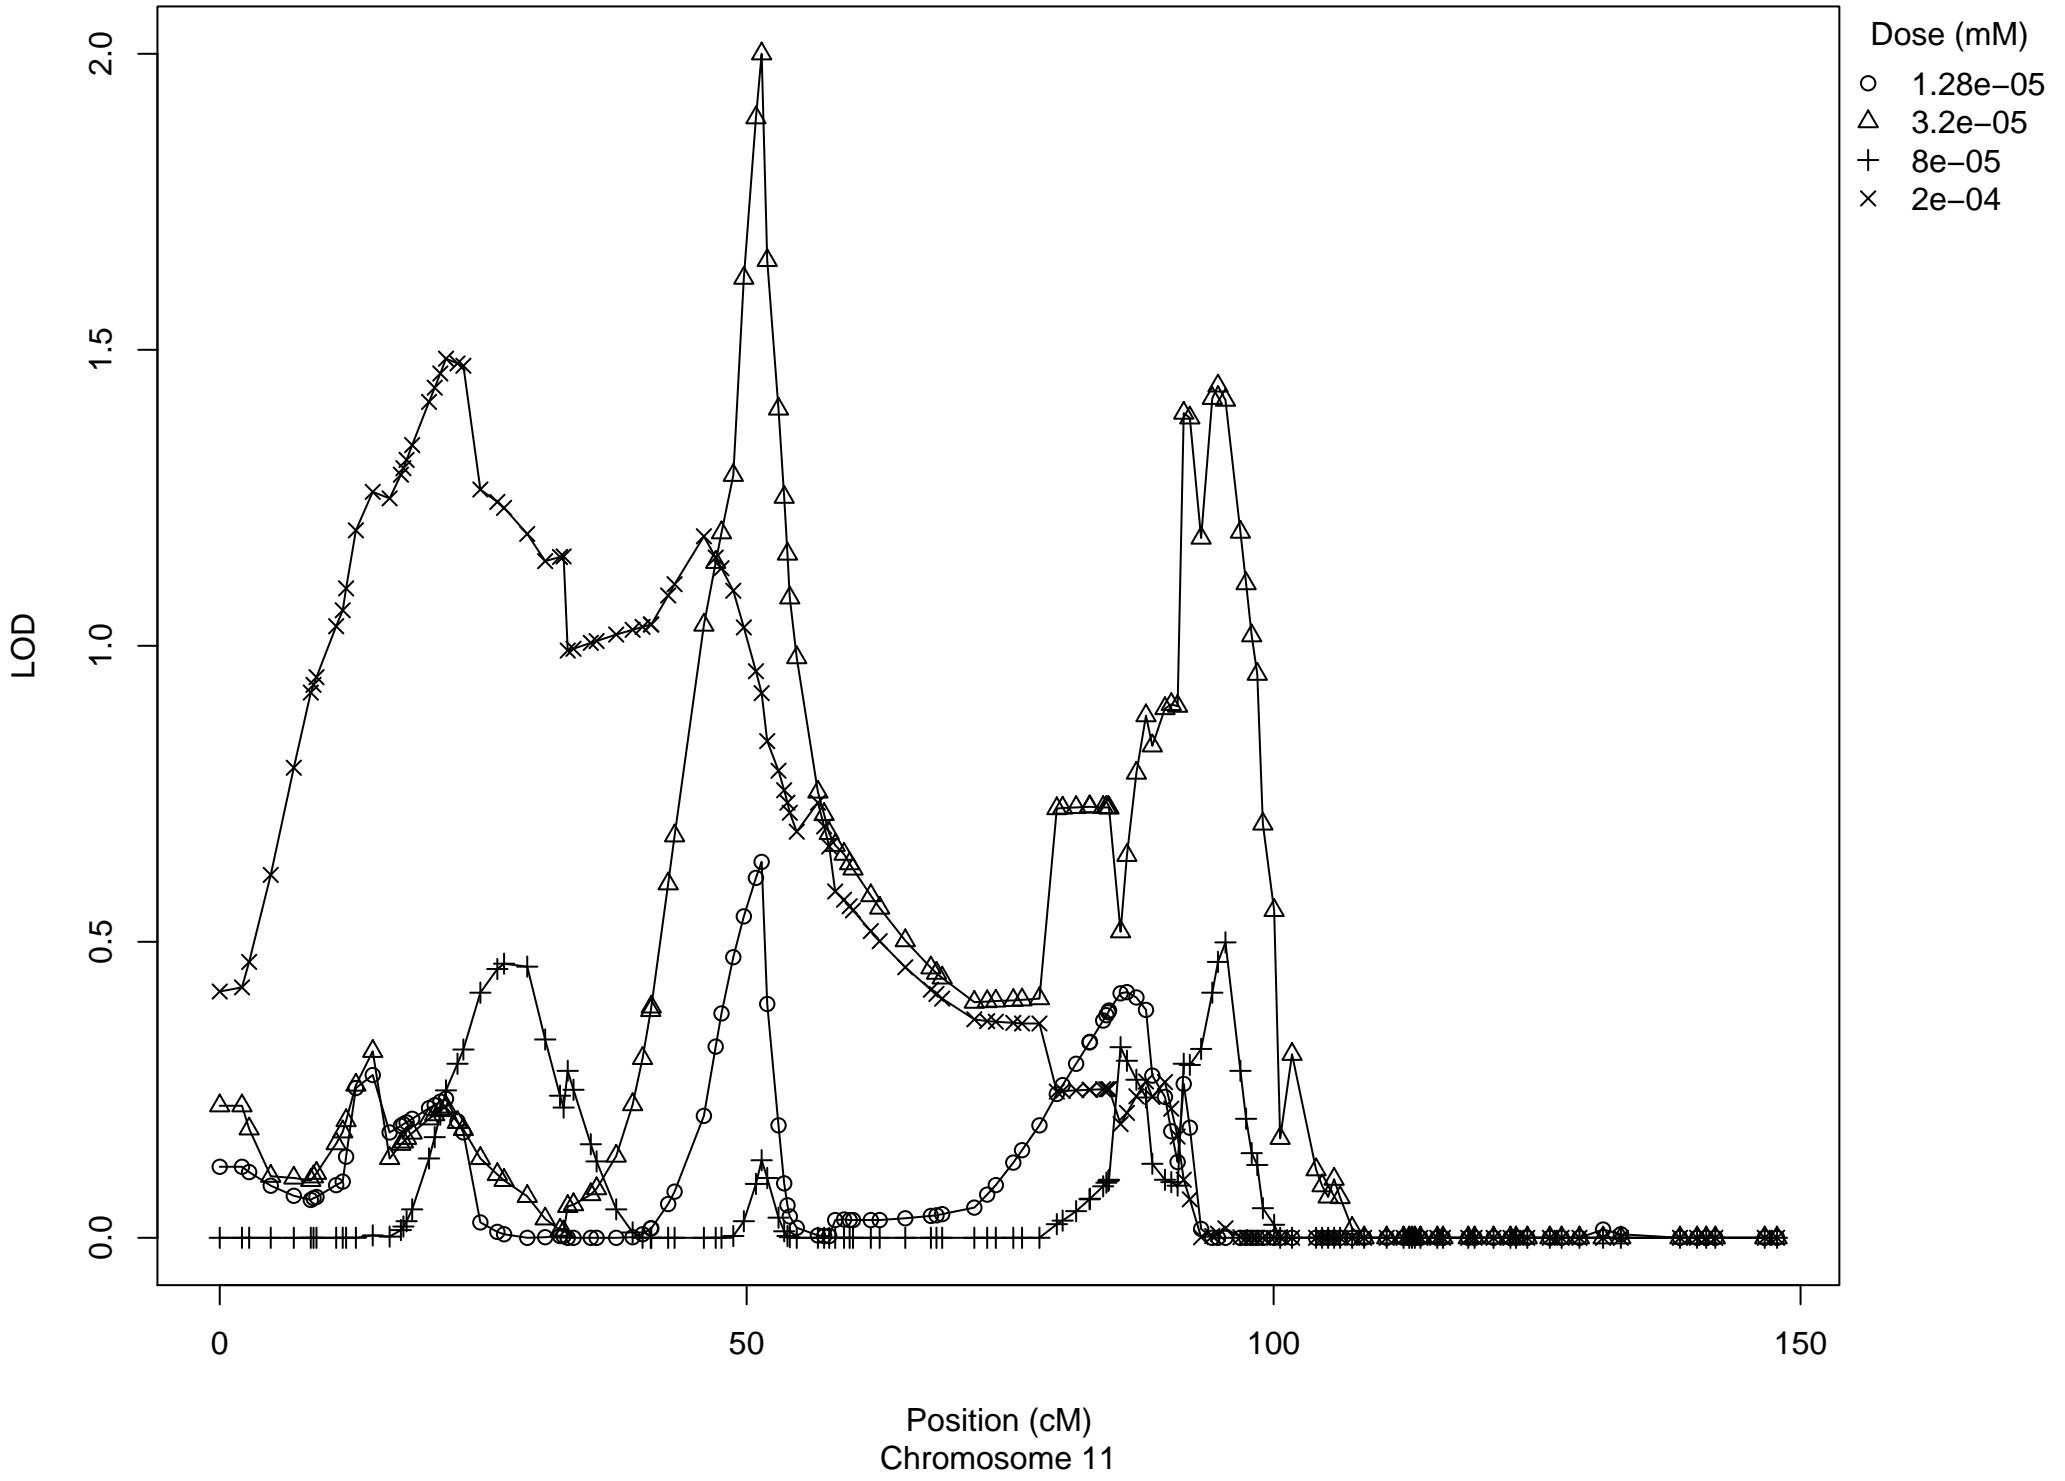

# Docetaxel (Doc)

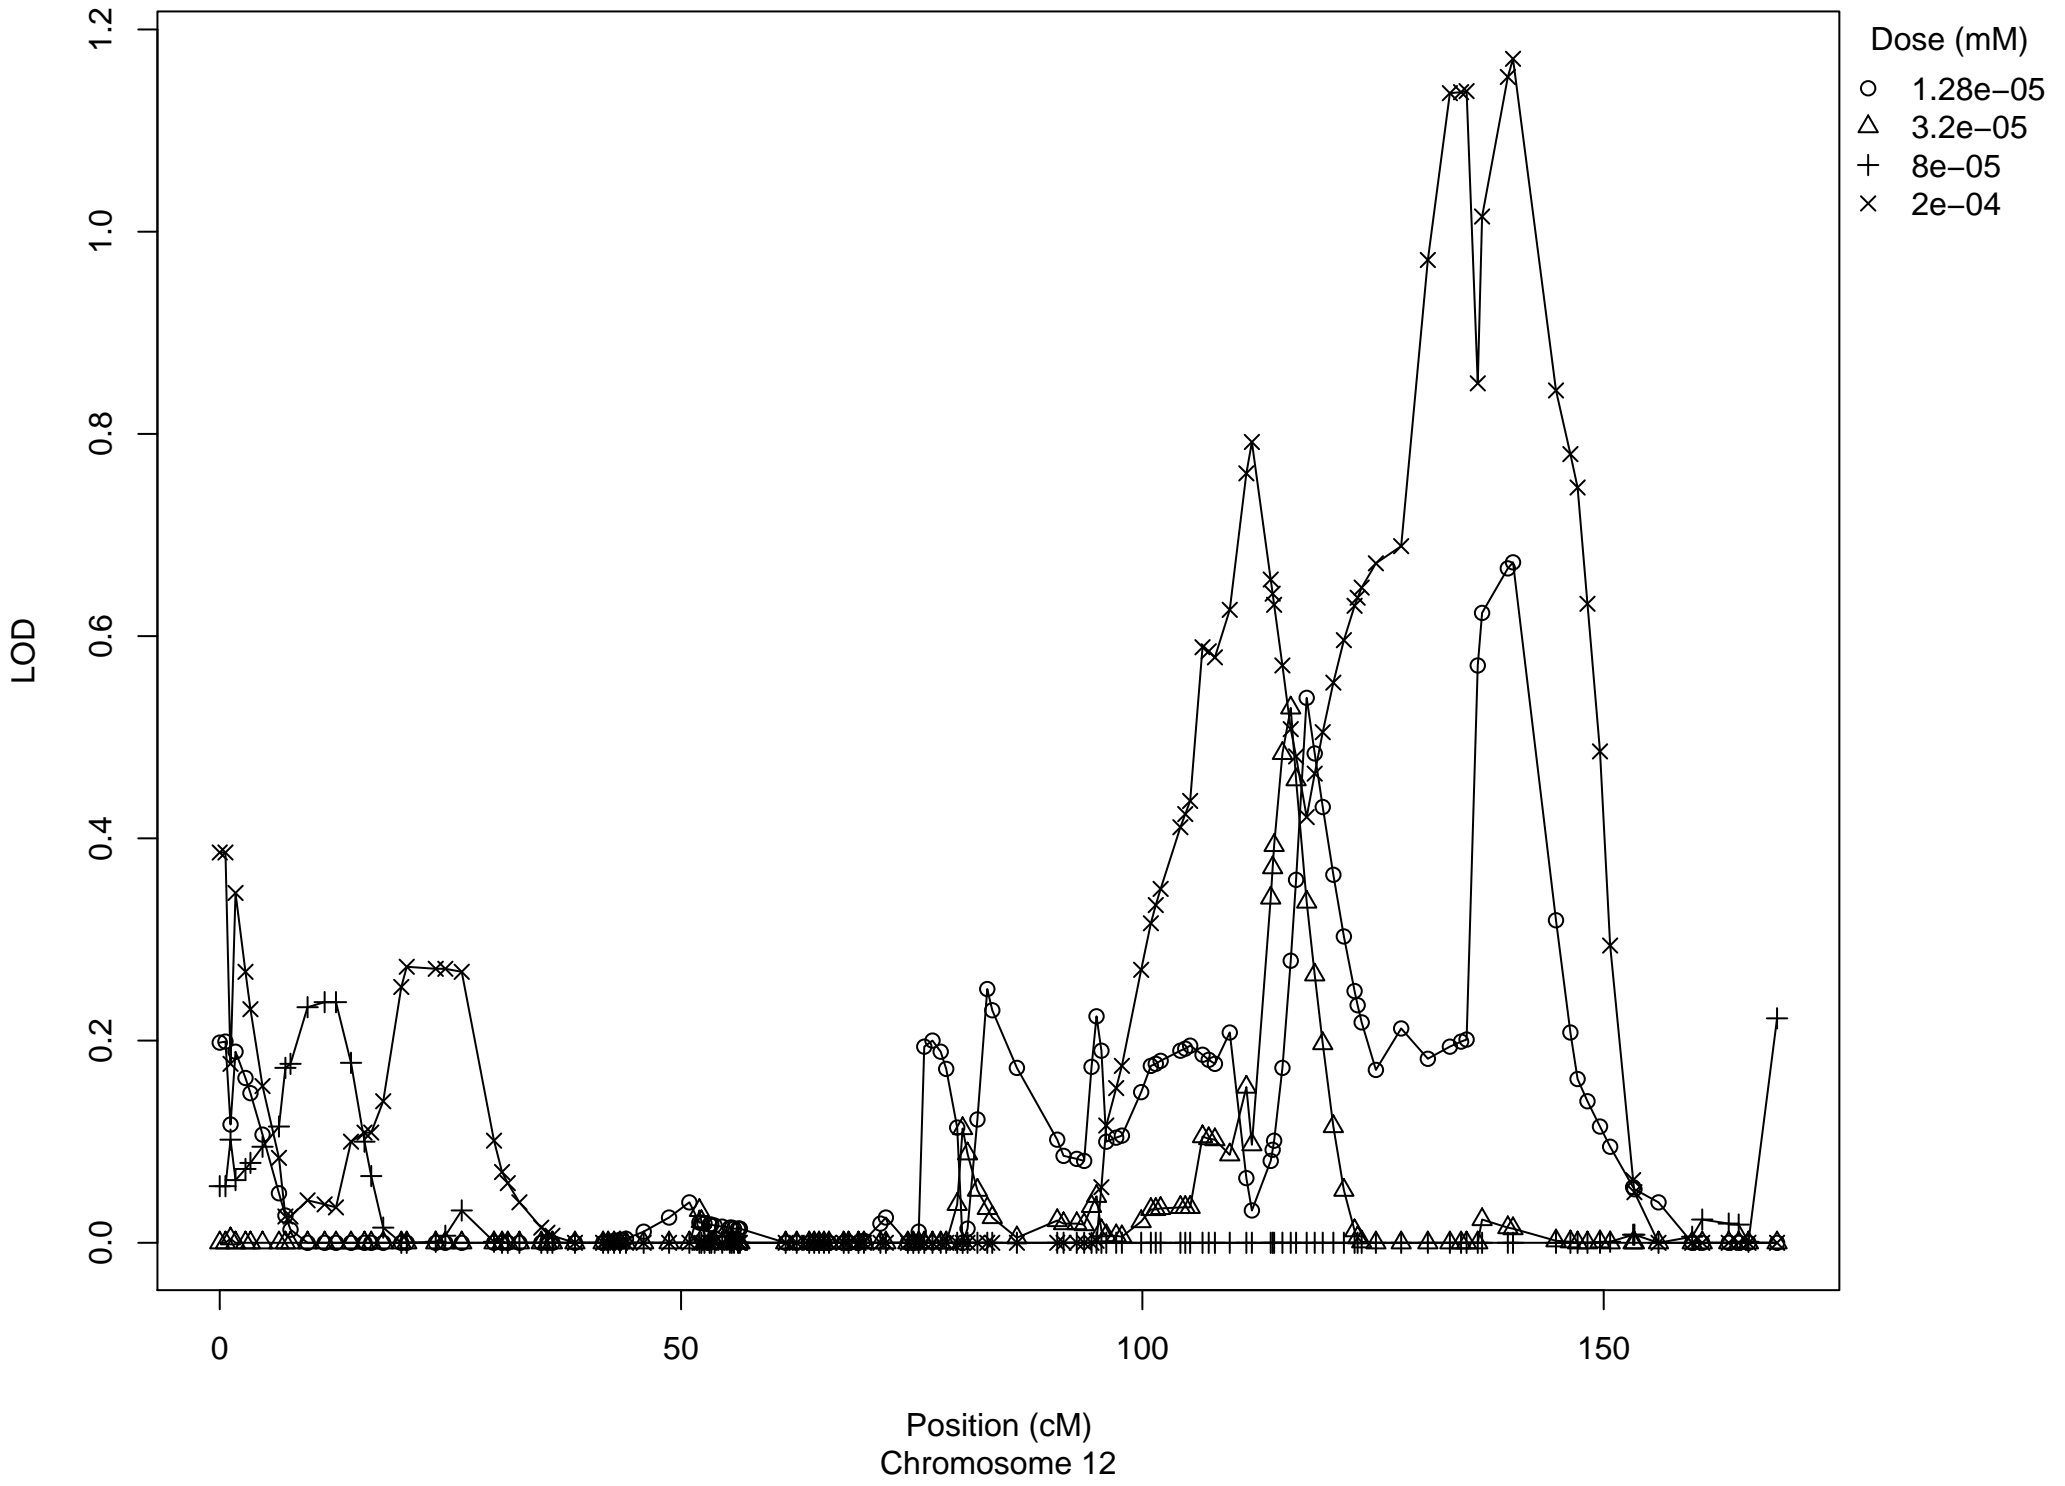

# Docetaxel (Doc)

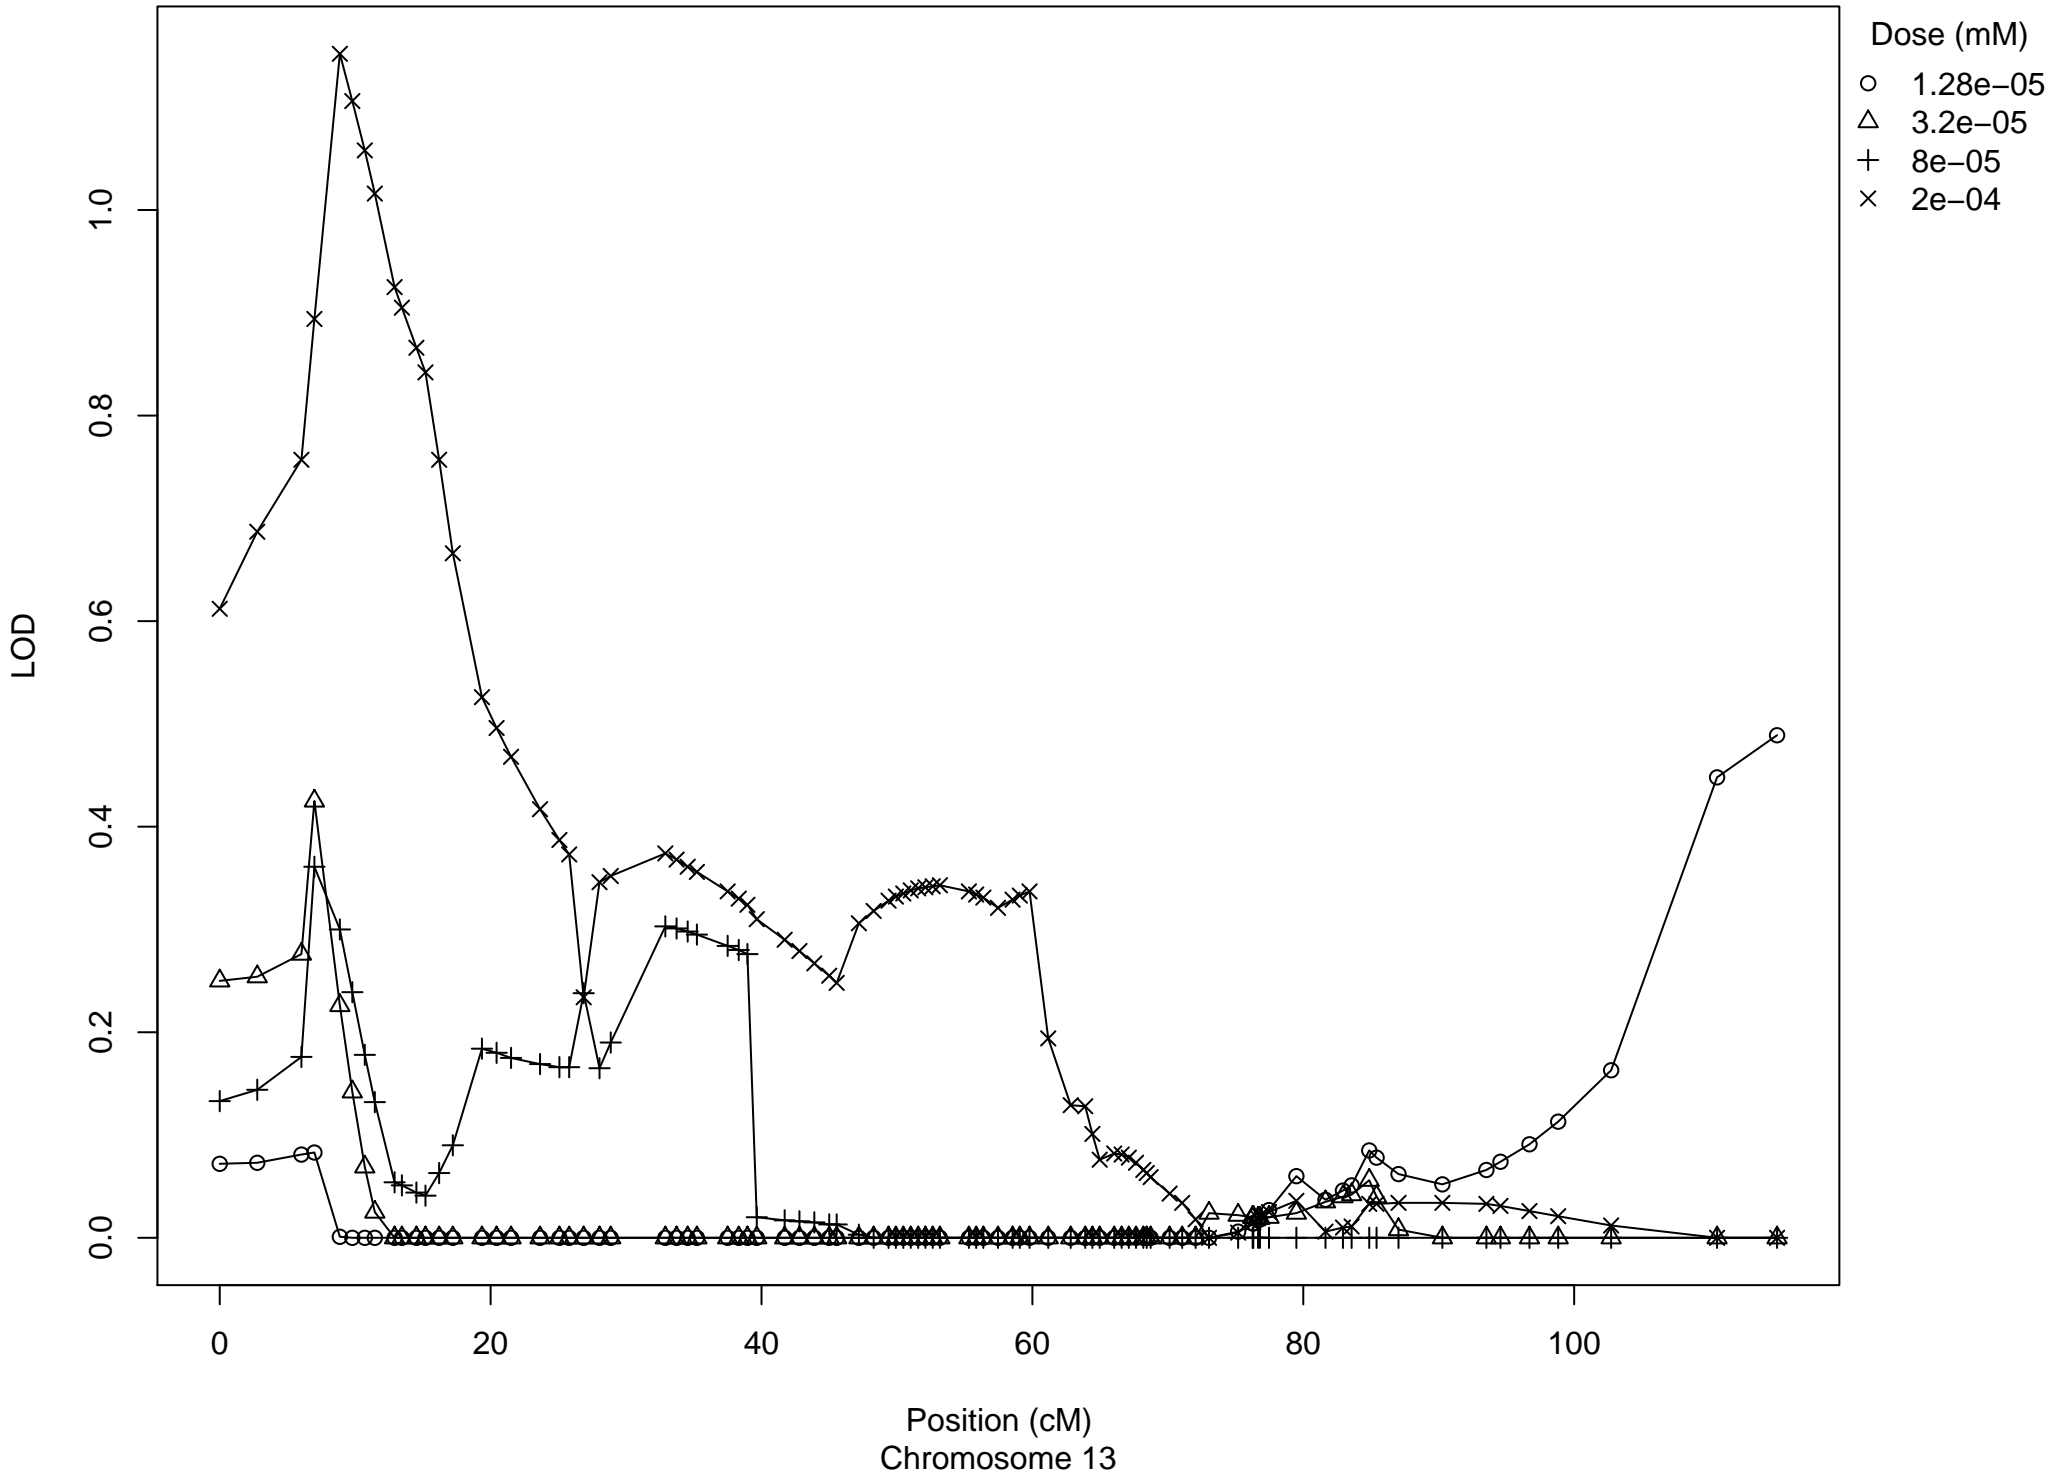

# Docetaxel (Doc)

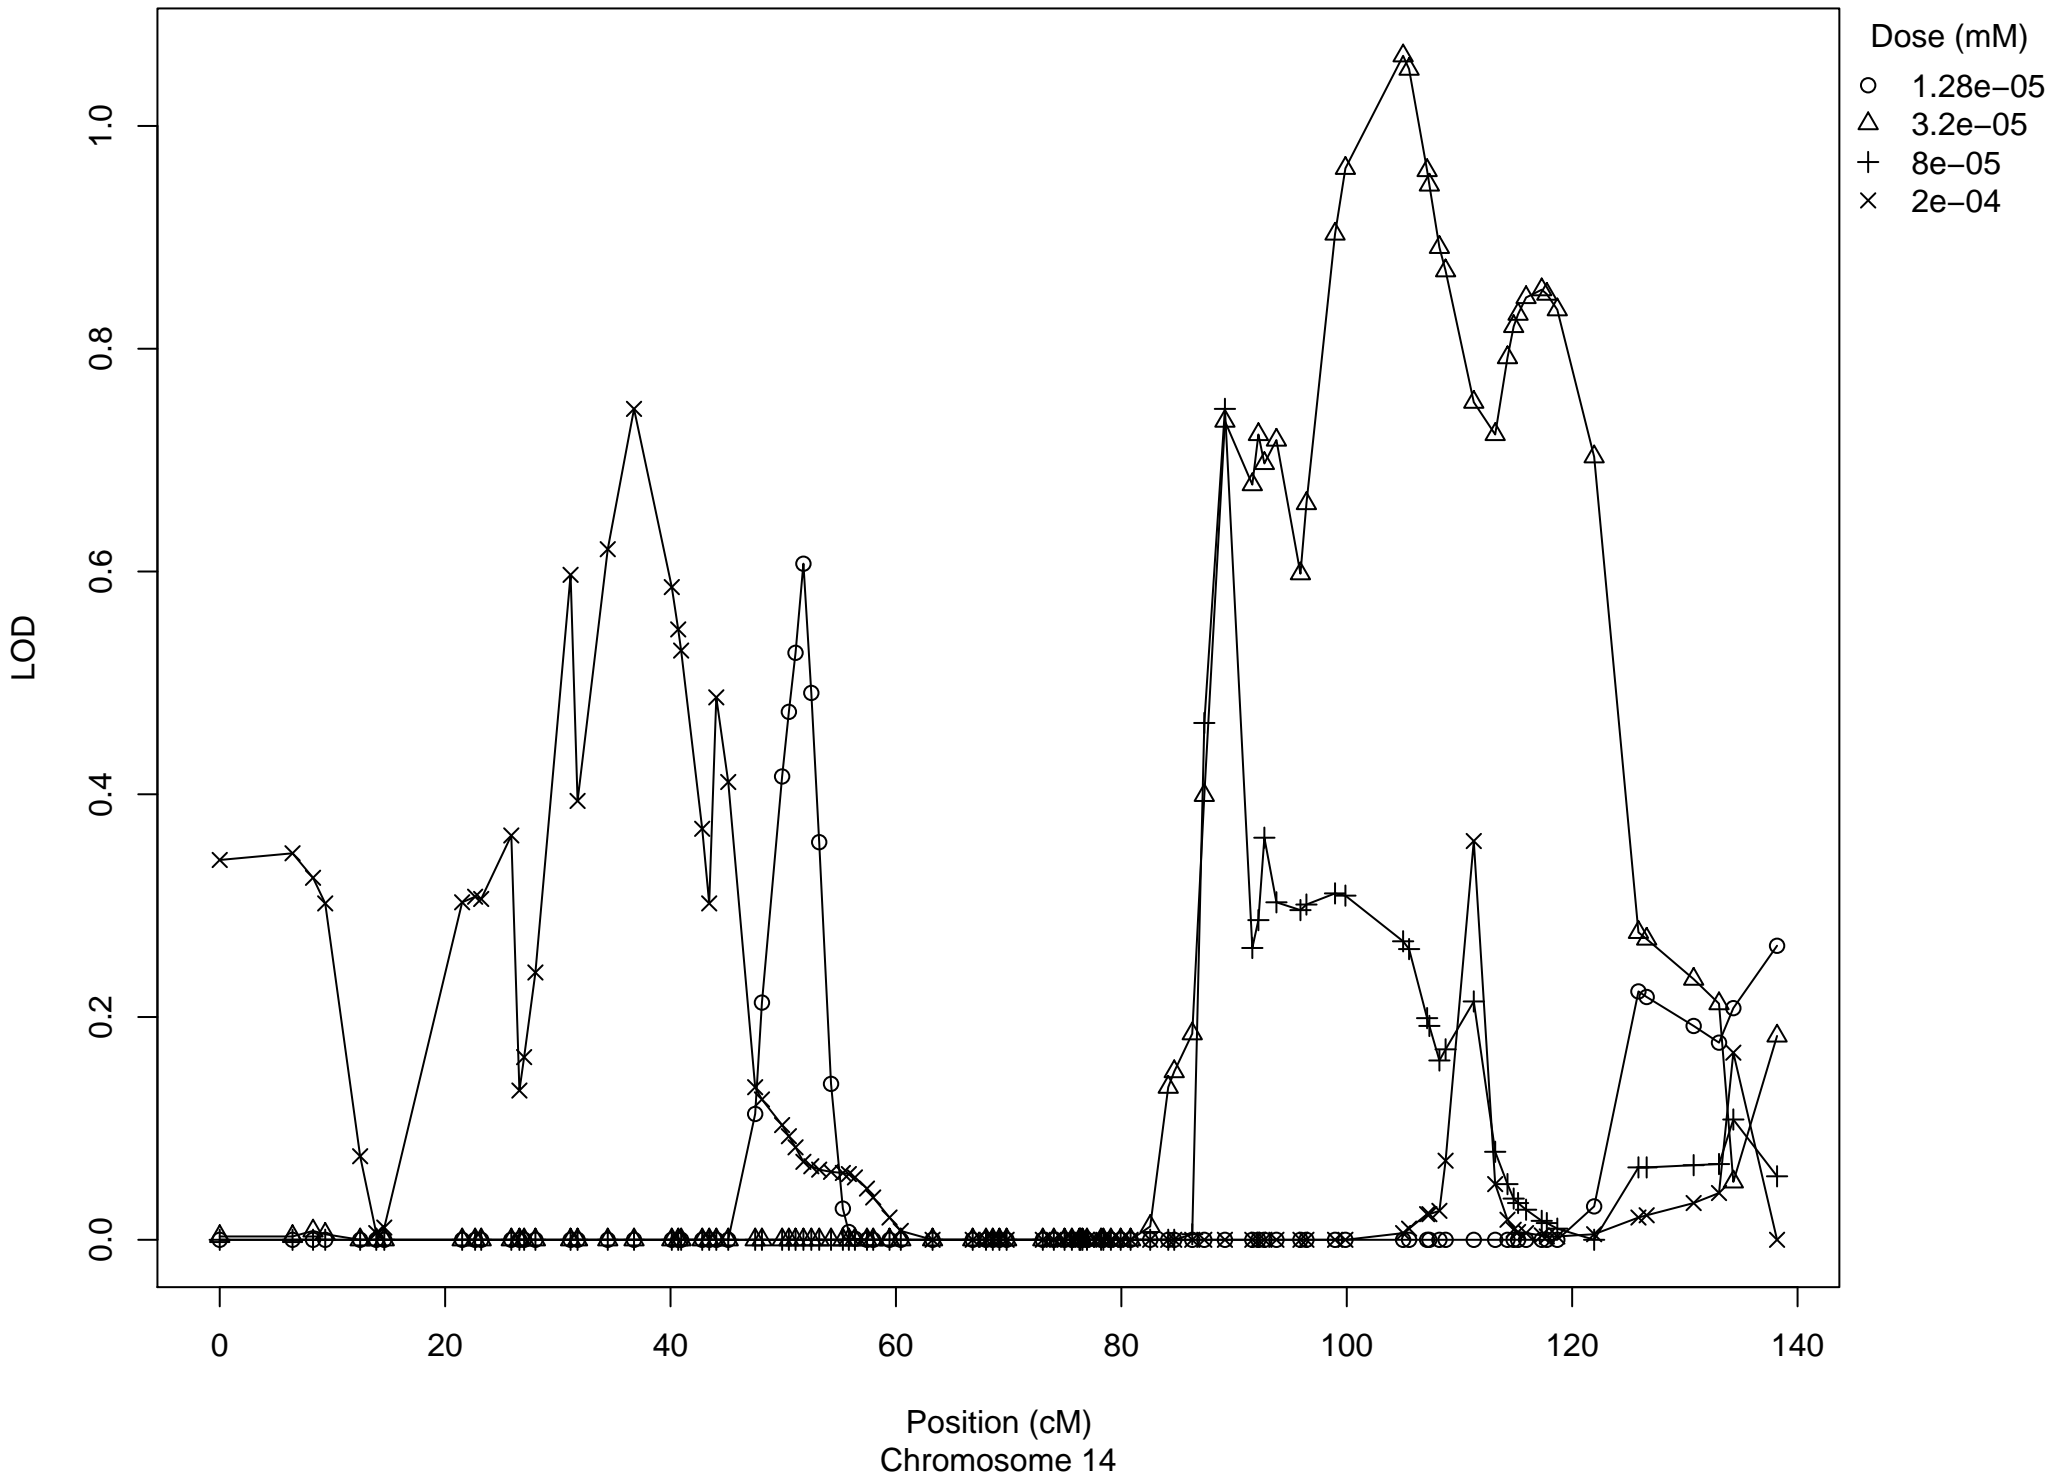



# Docetaxel (Doc)

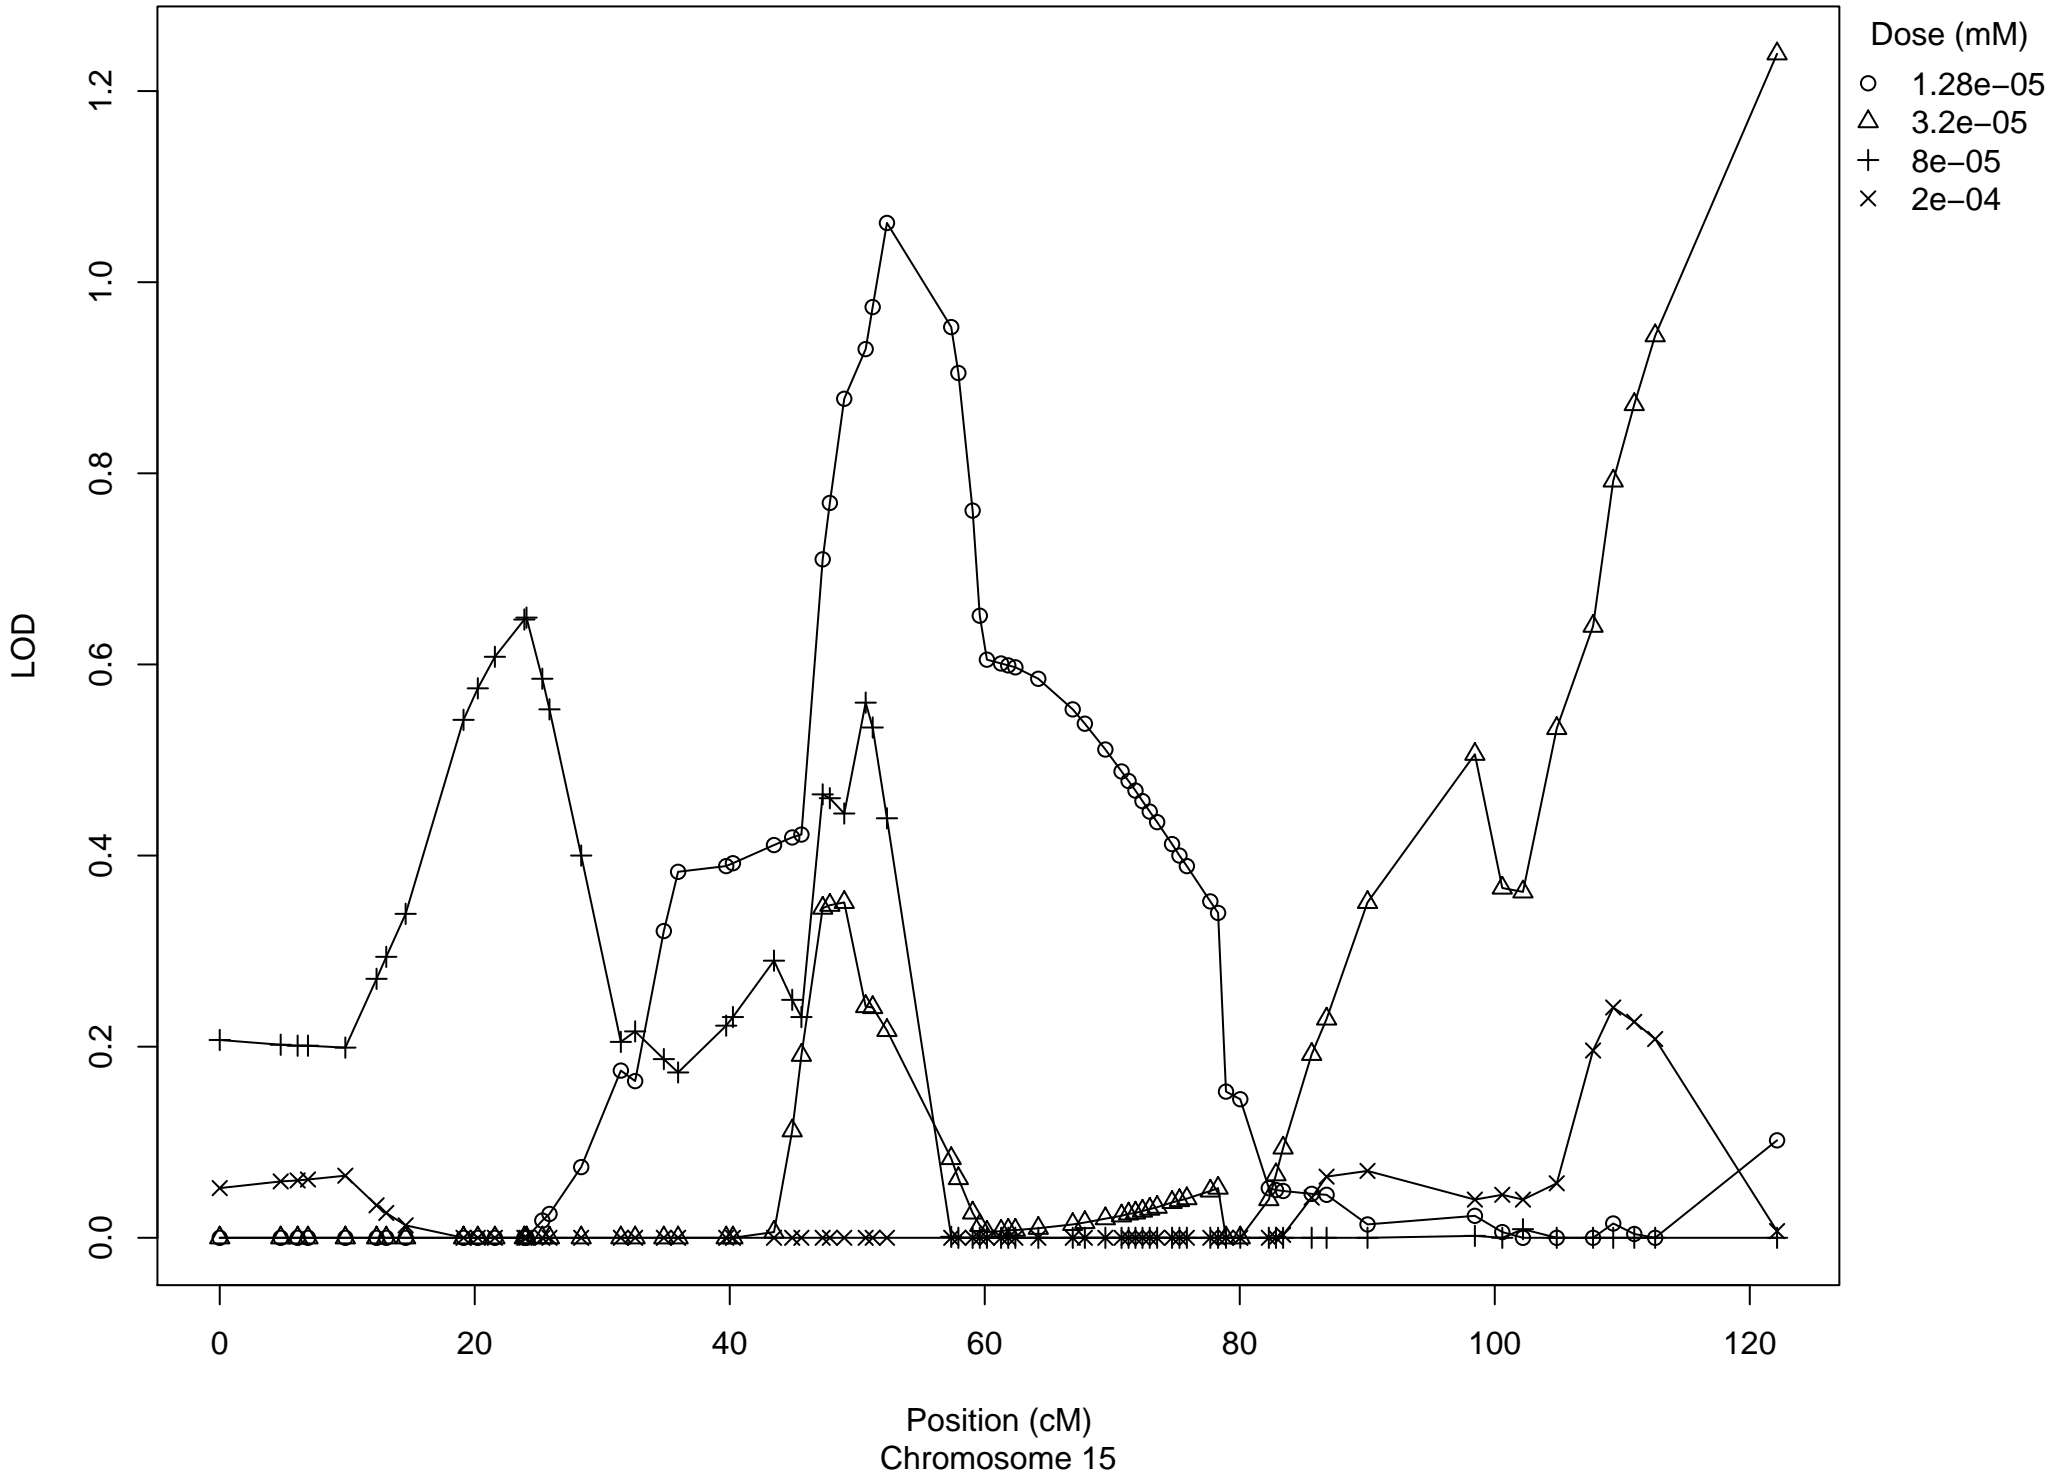

# Docetaxel (Doc)

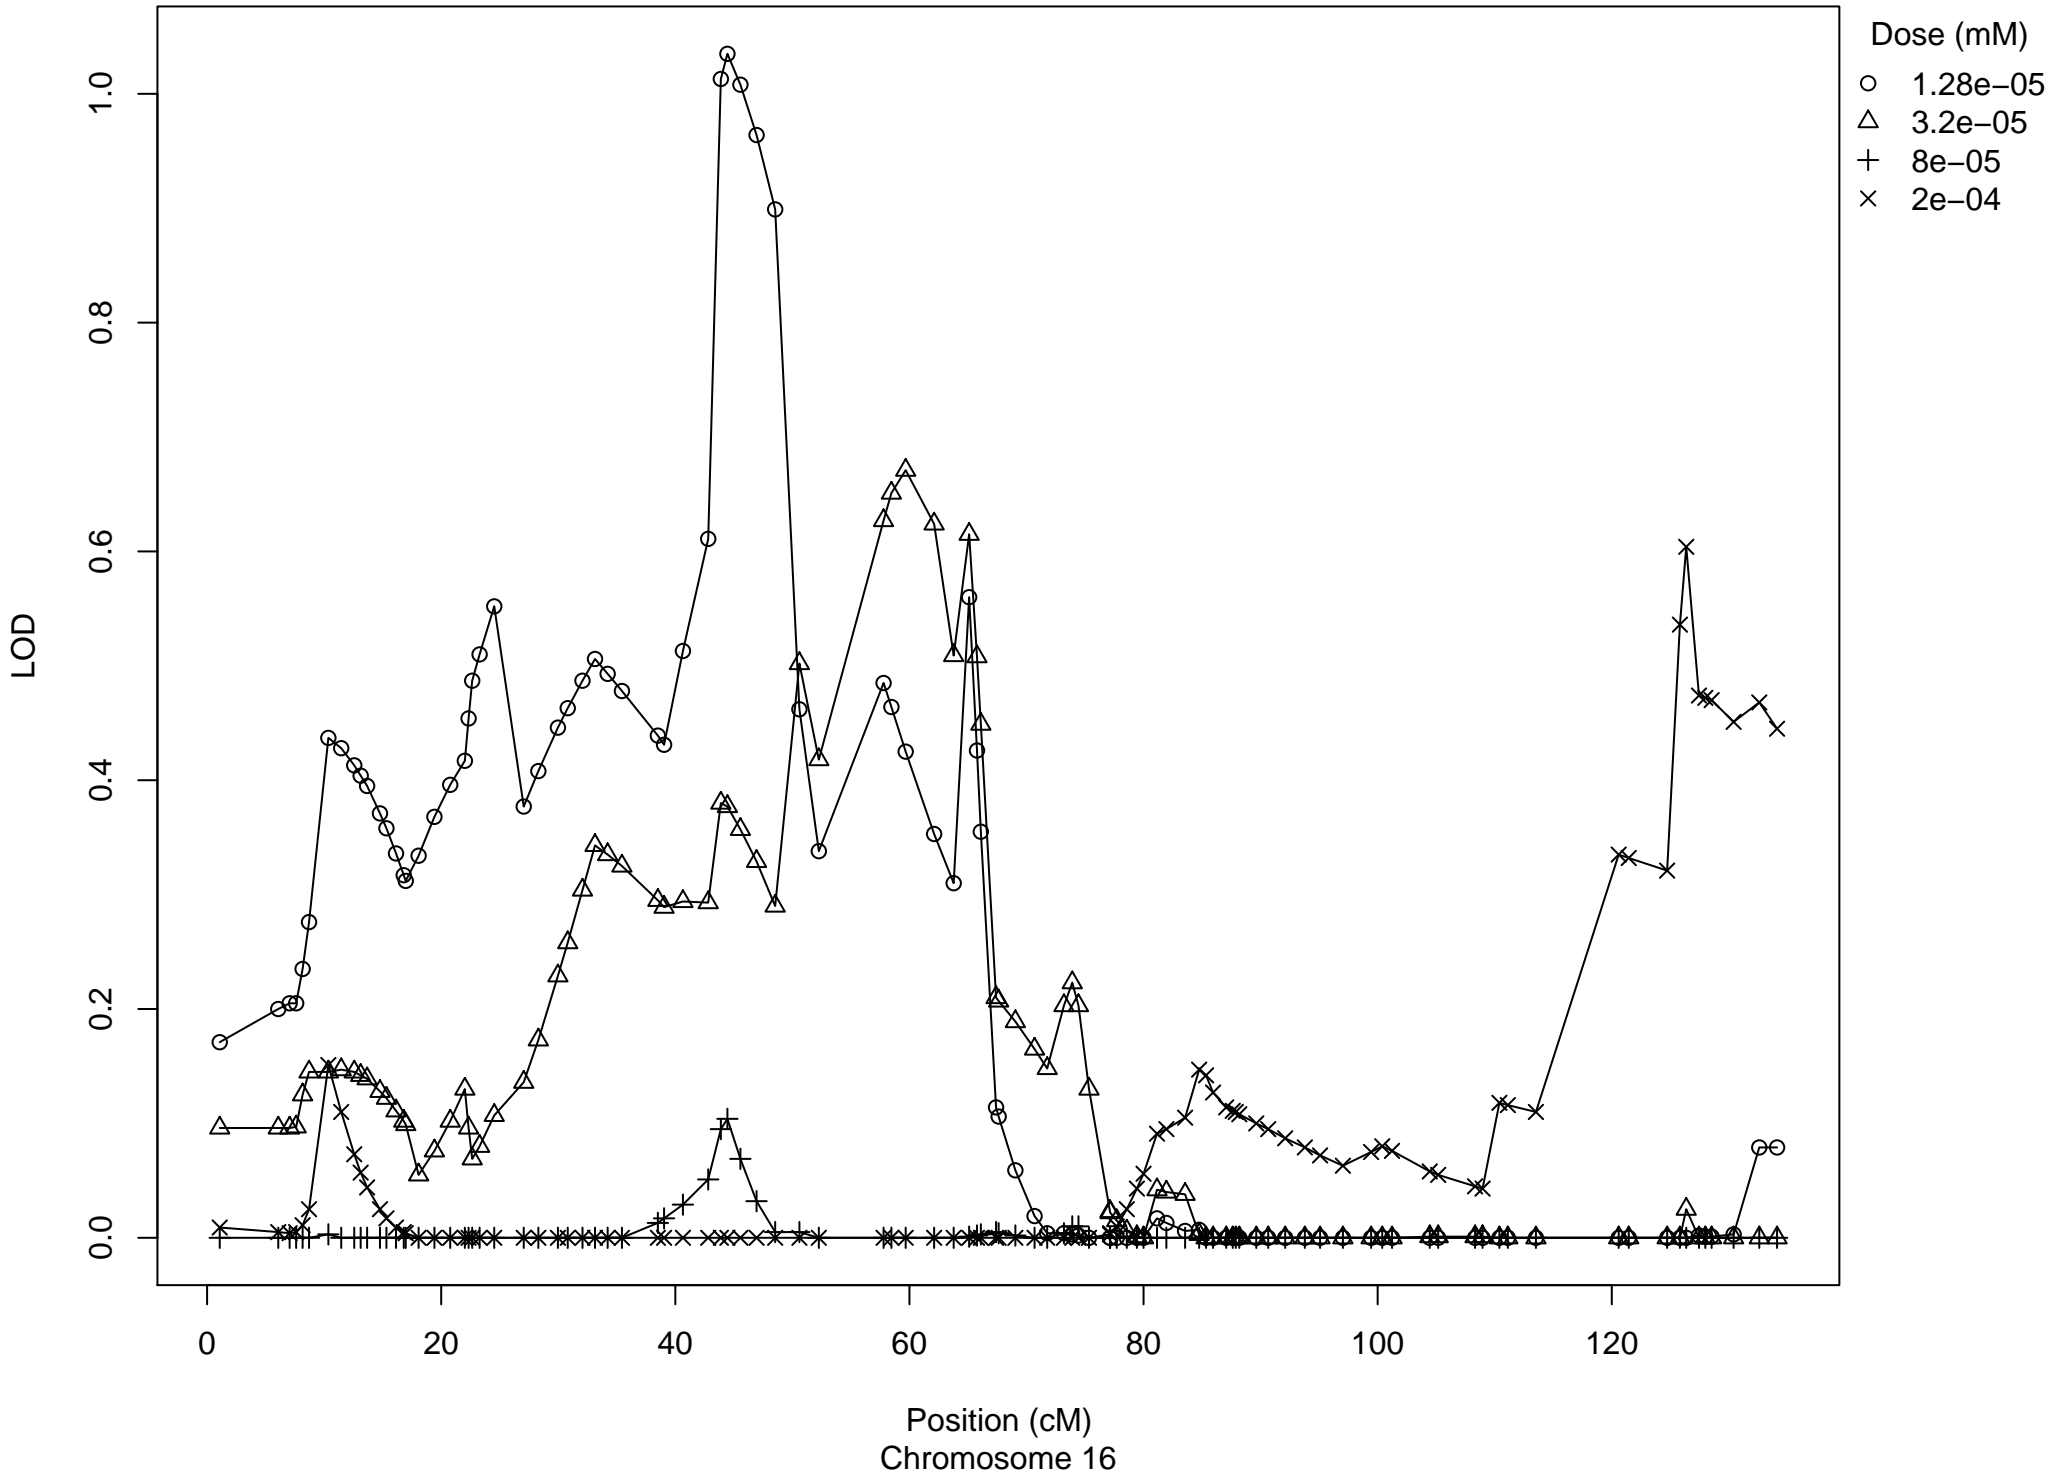

# Docetaxel (Doc)

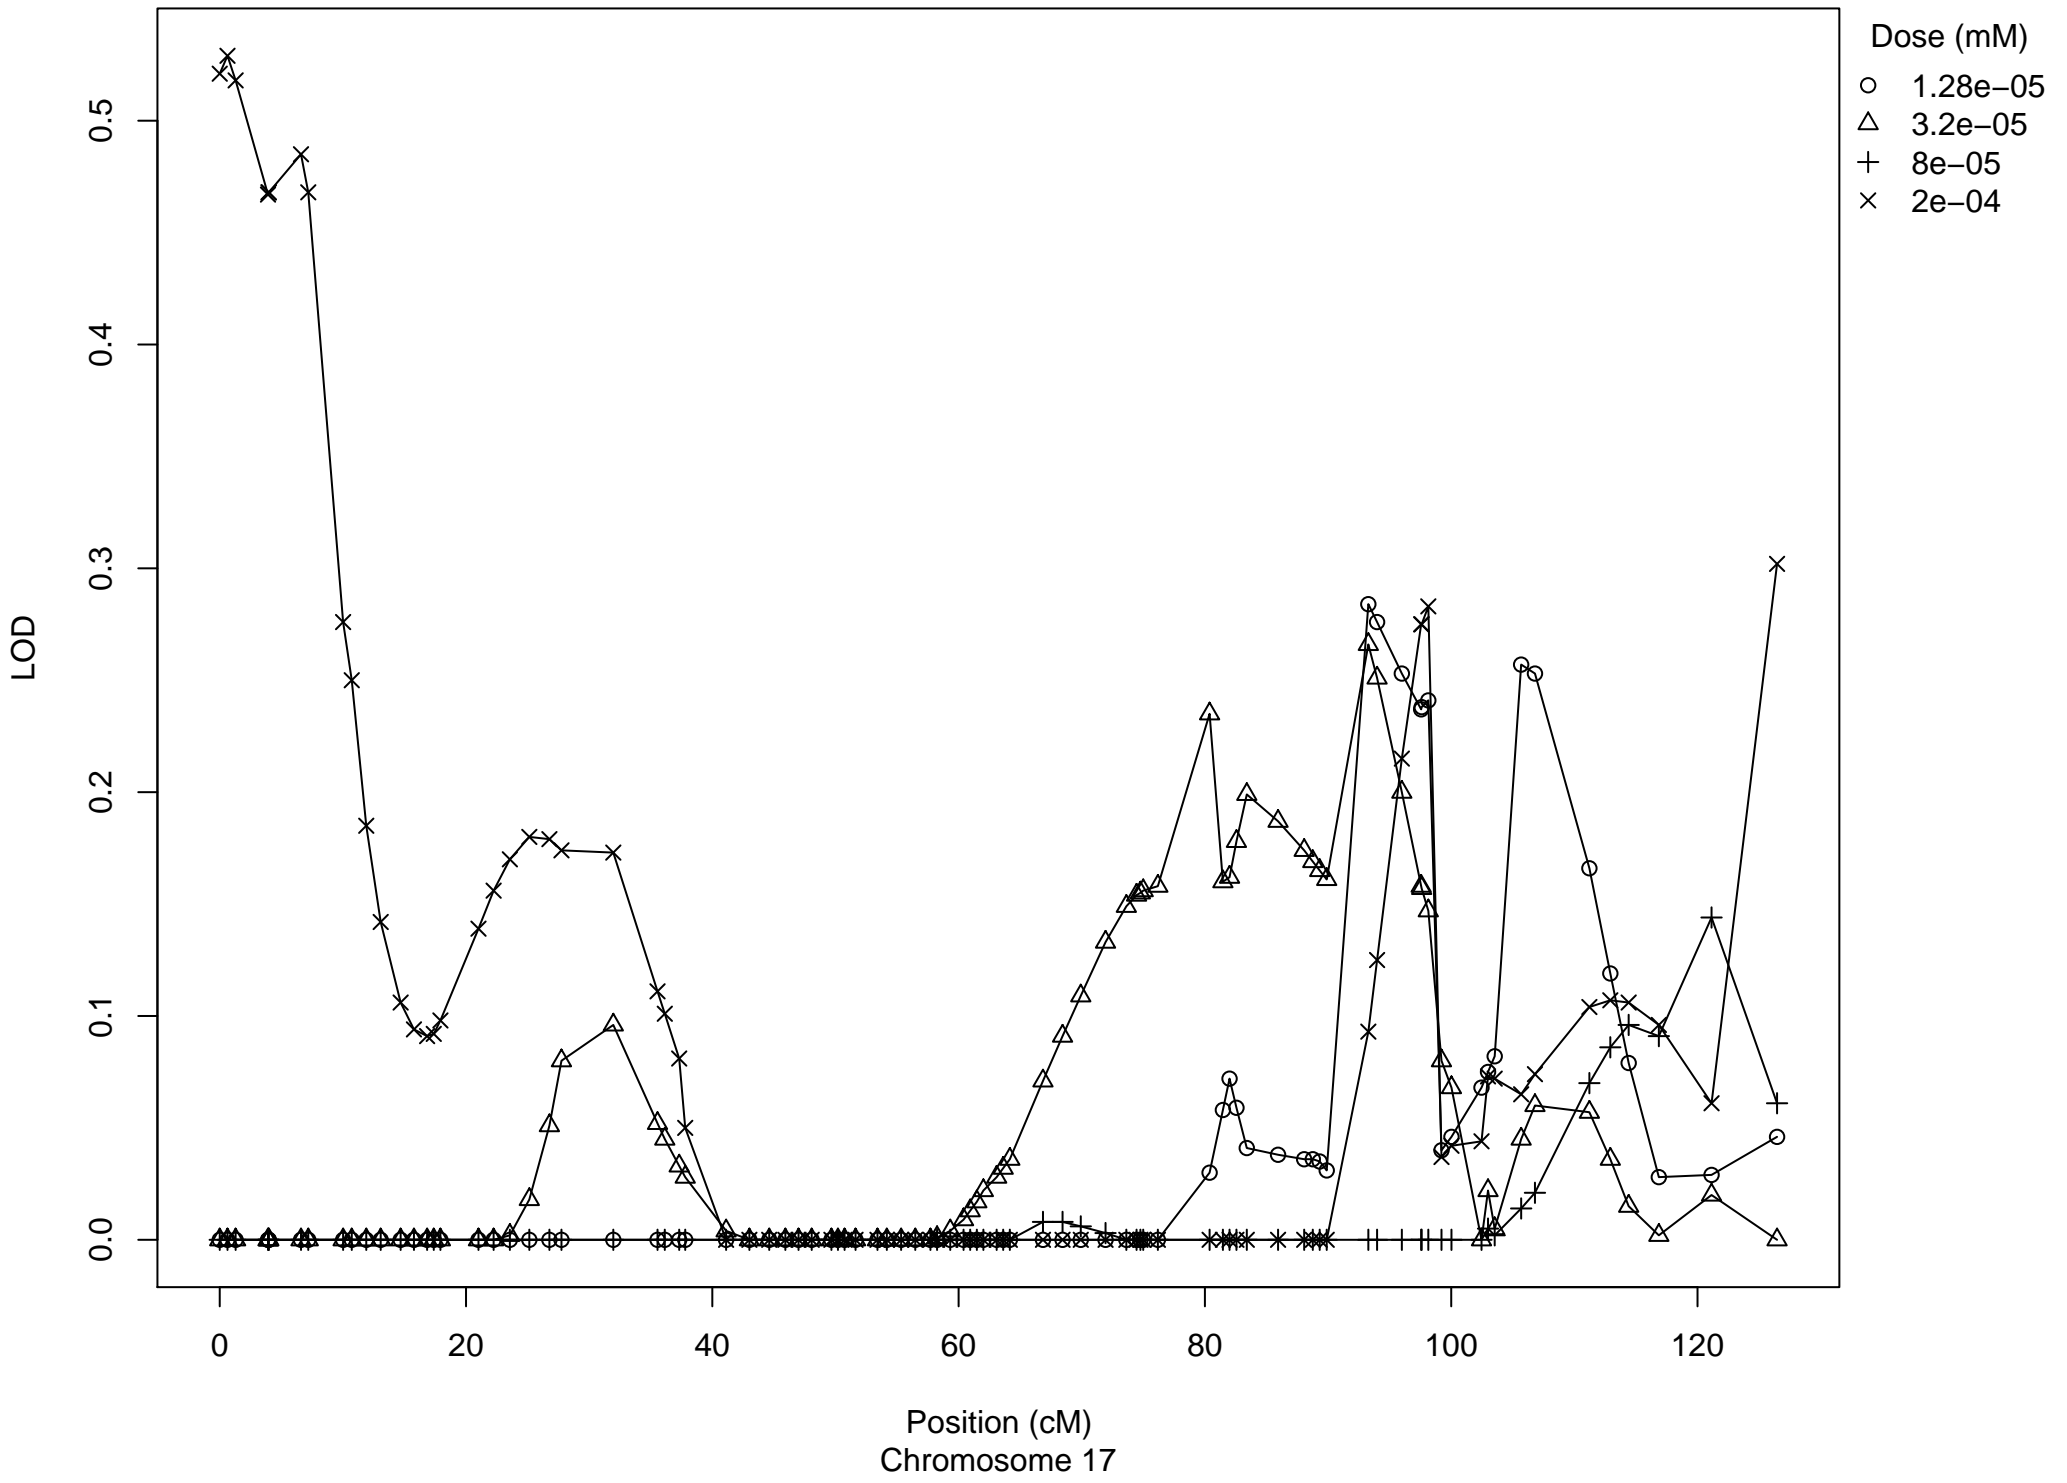

# Docetaxel (Doc)

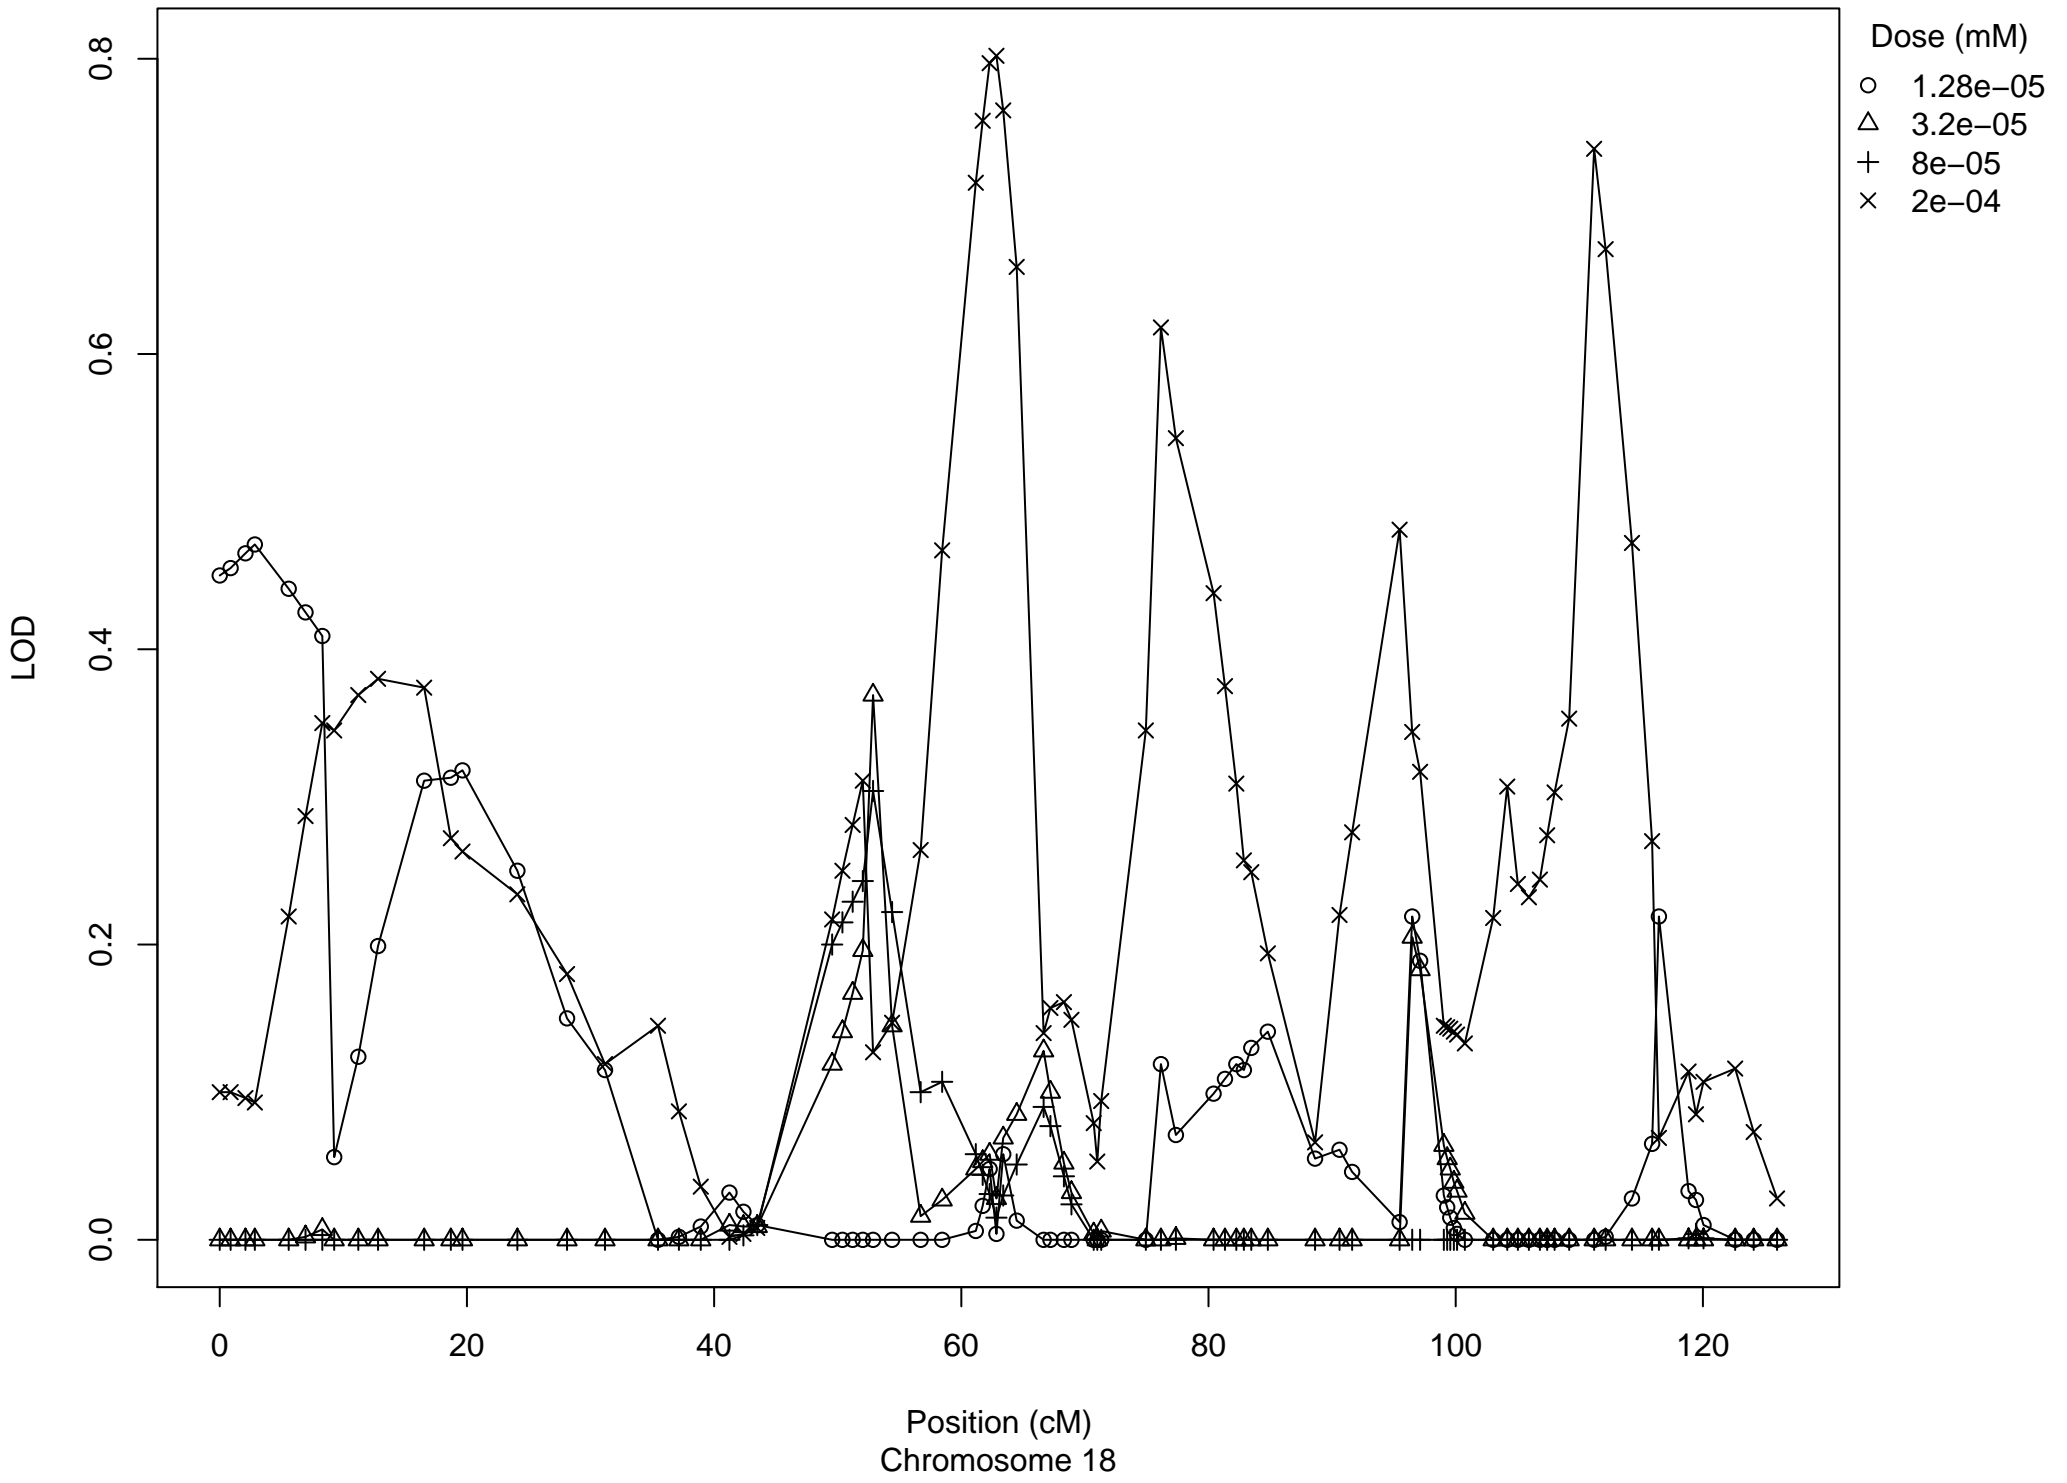

# Docetaxel (Doc)

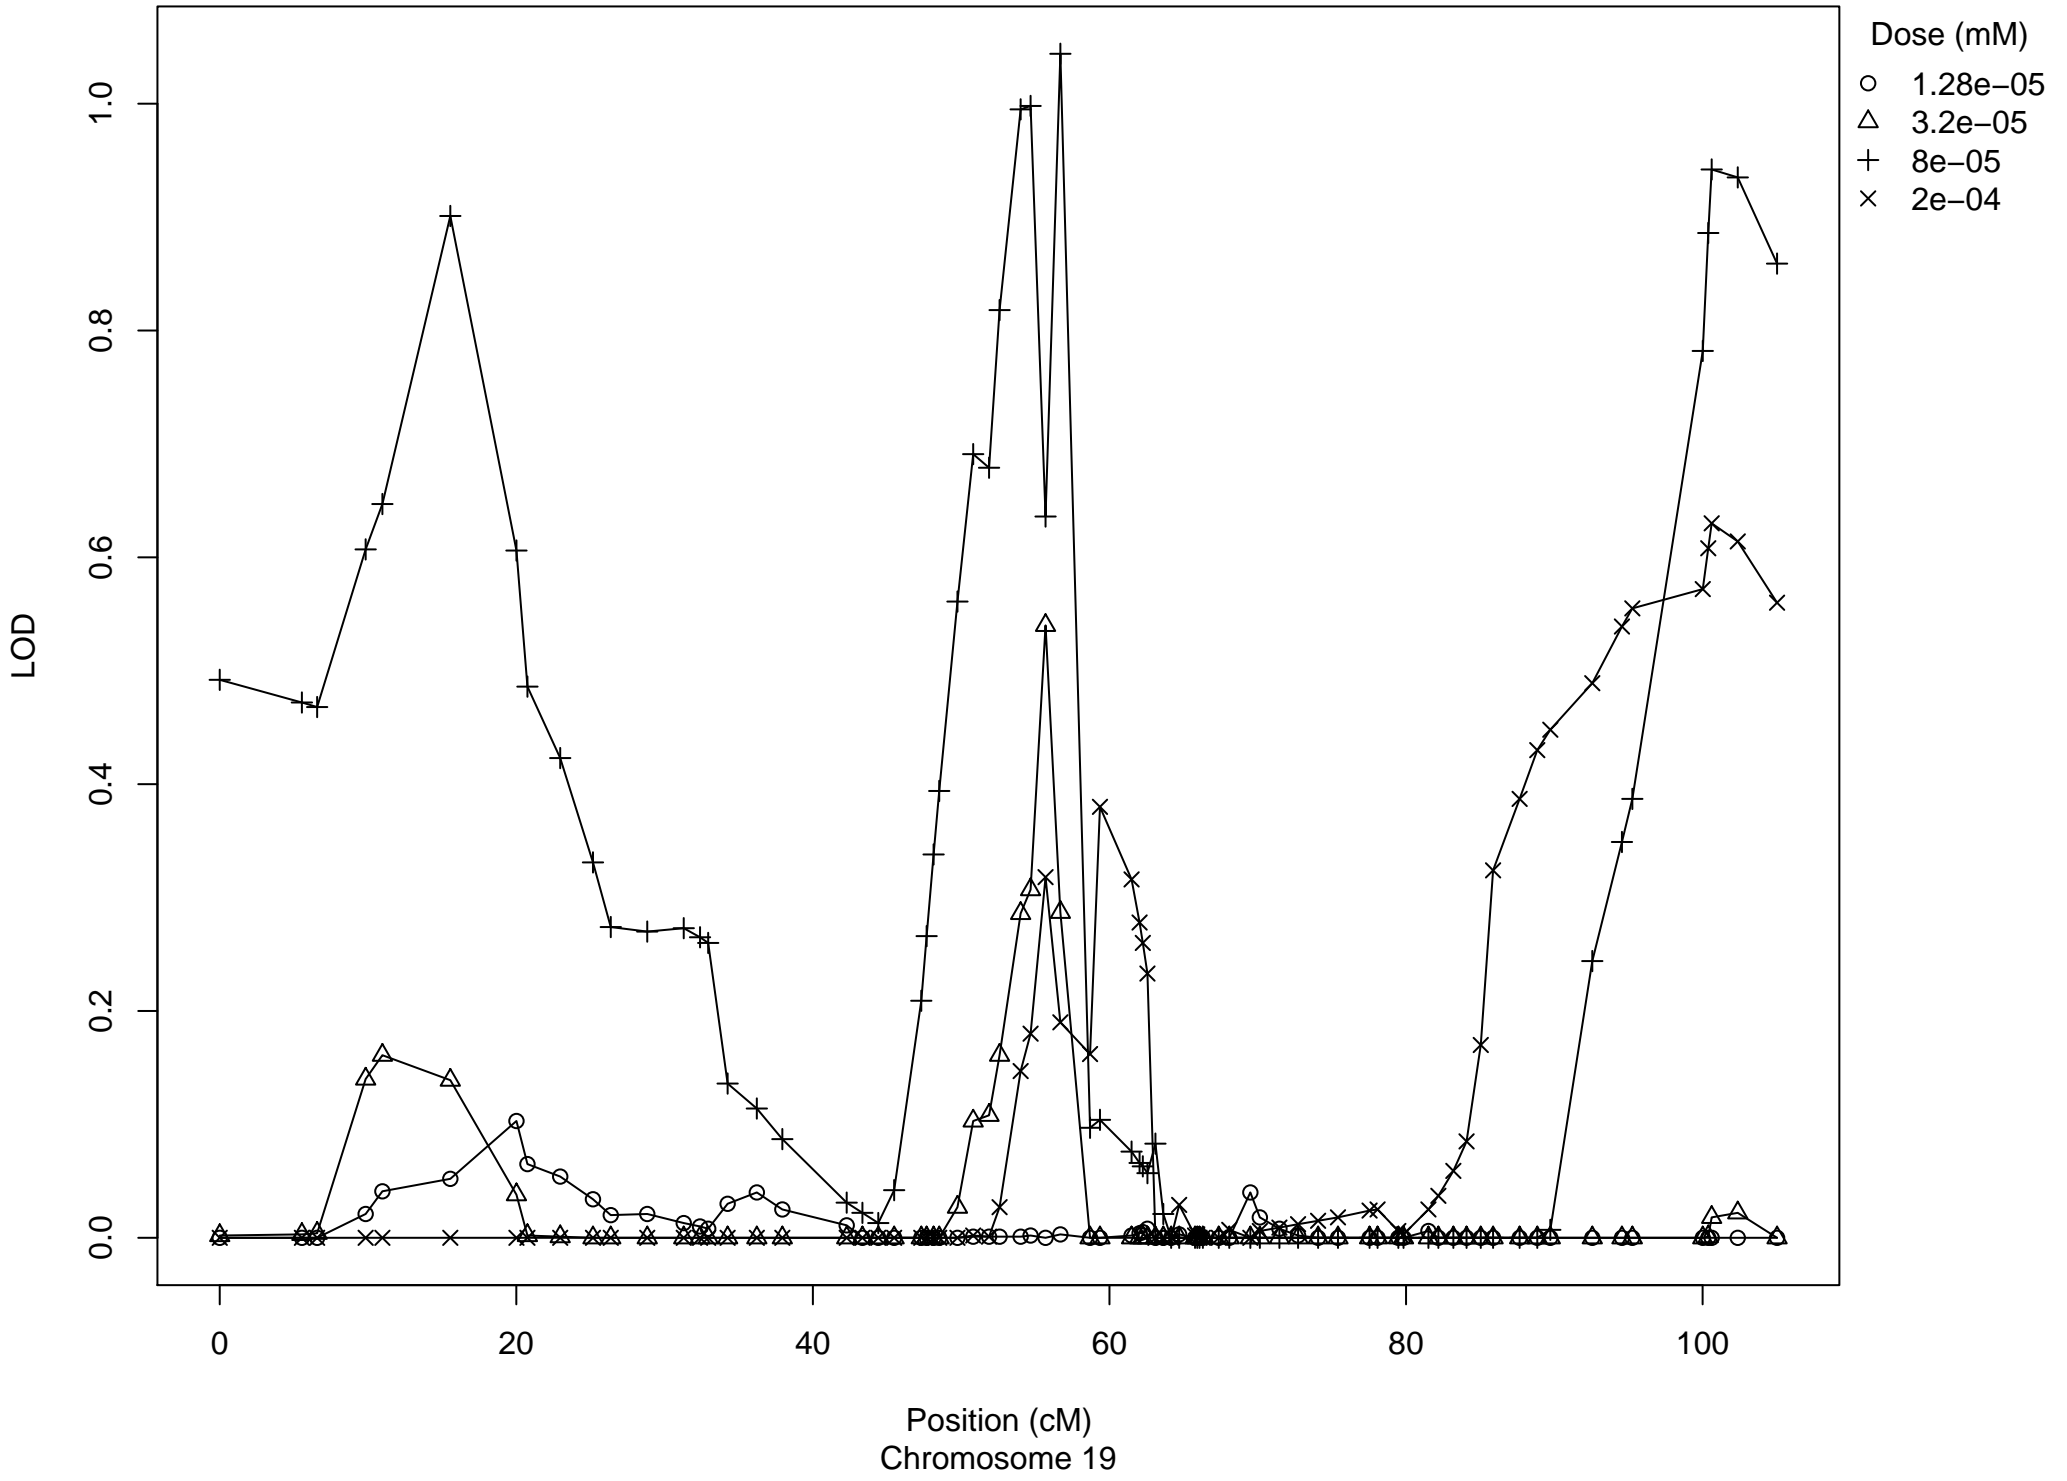

# Docetaxel (Doc)

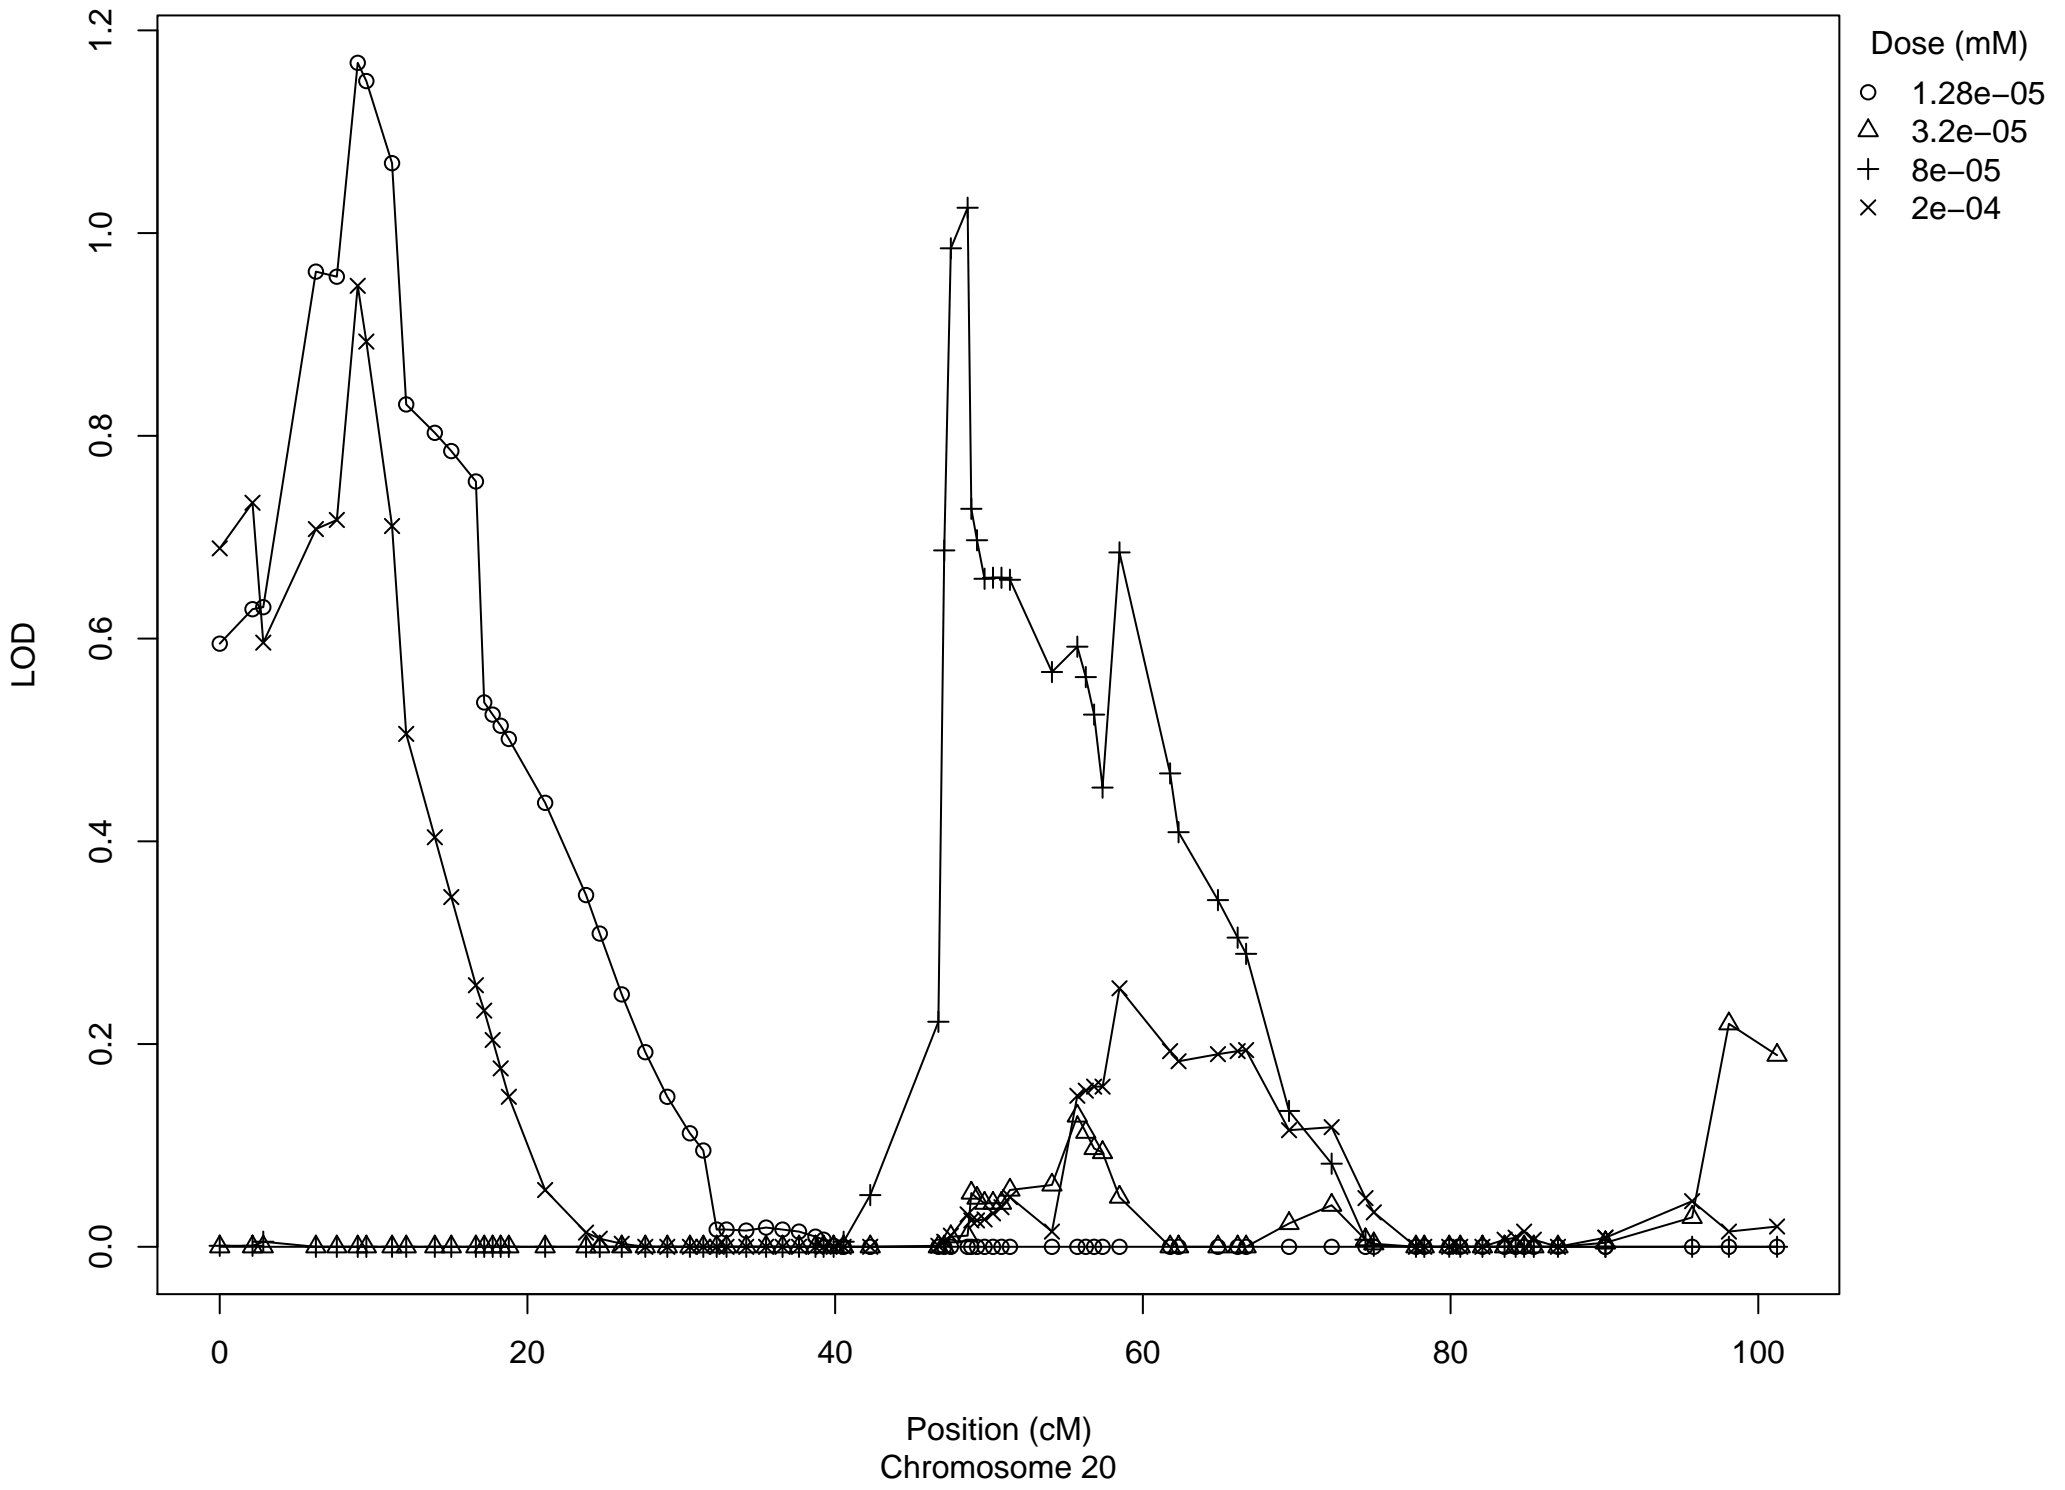

# Docetaxel (Doc)

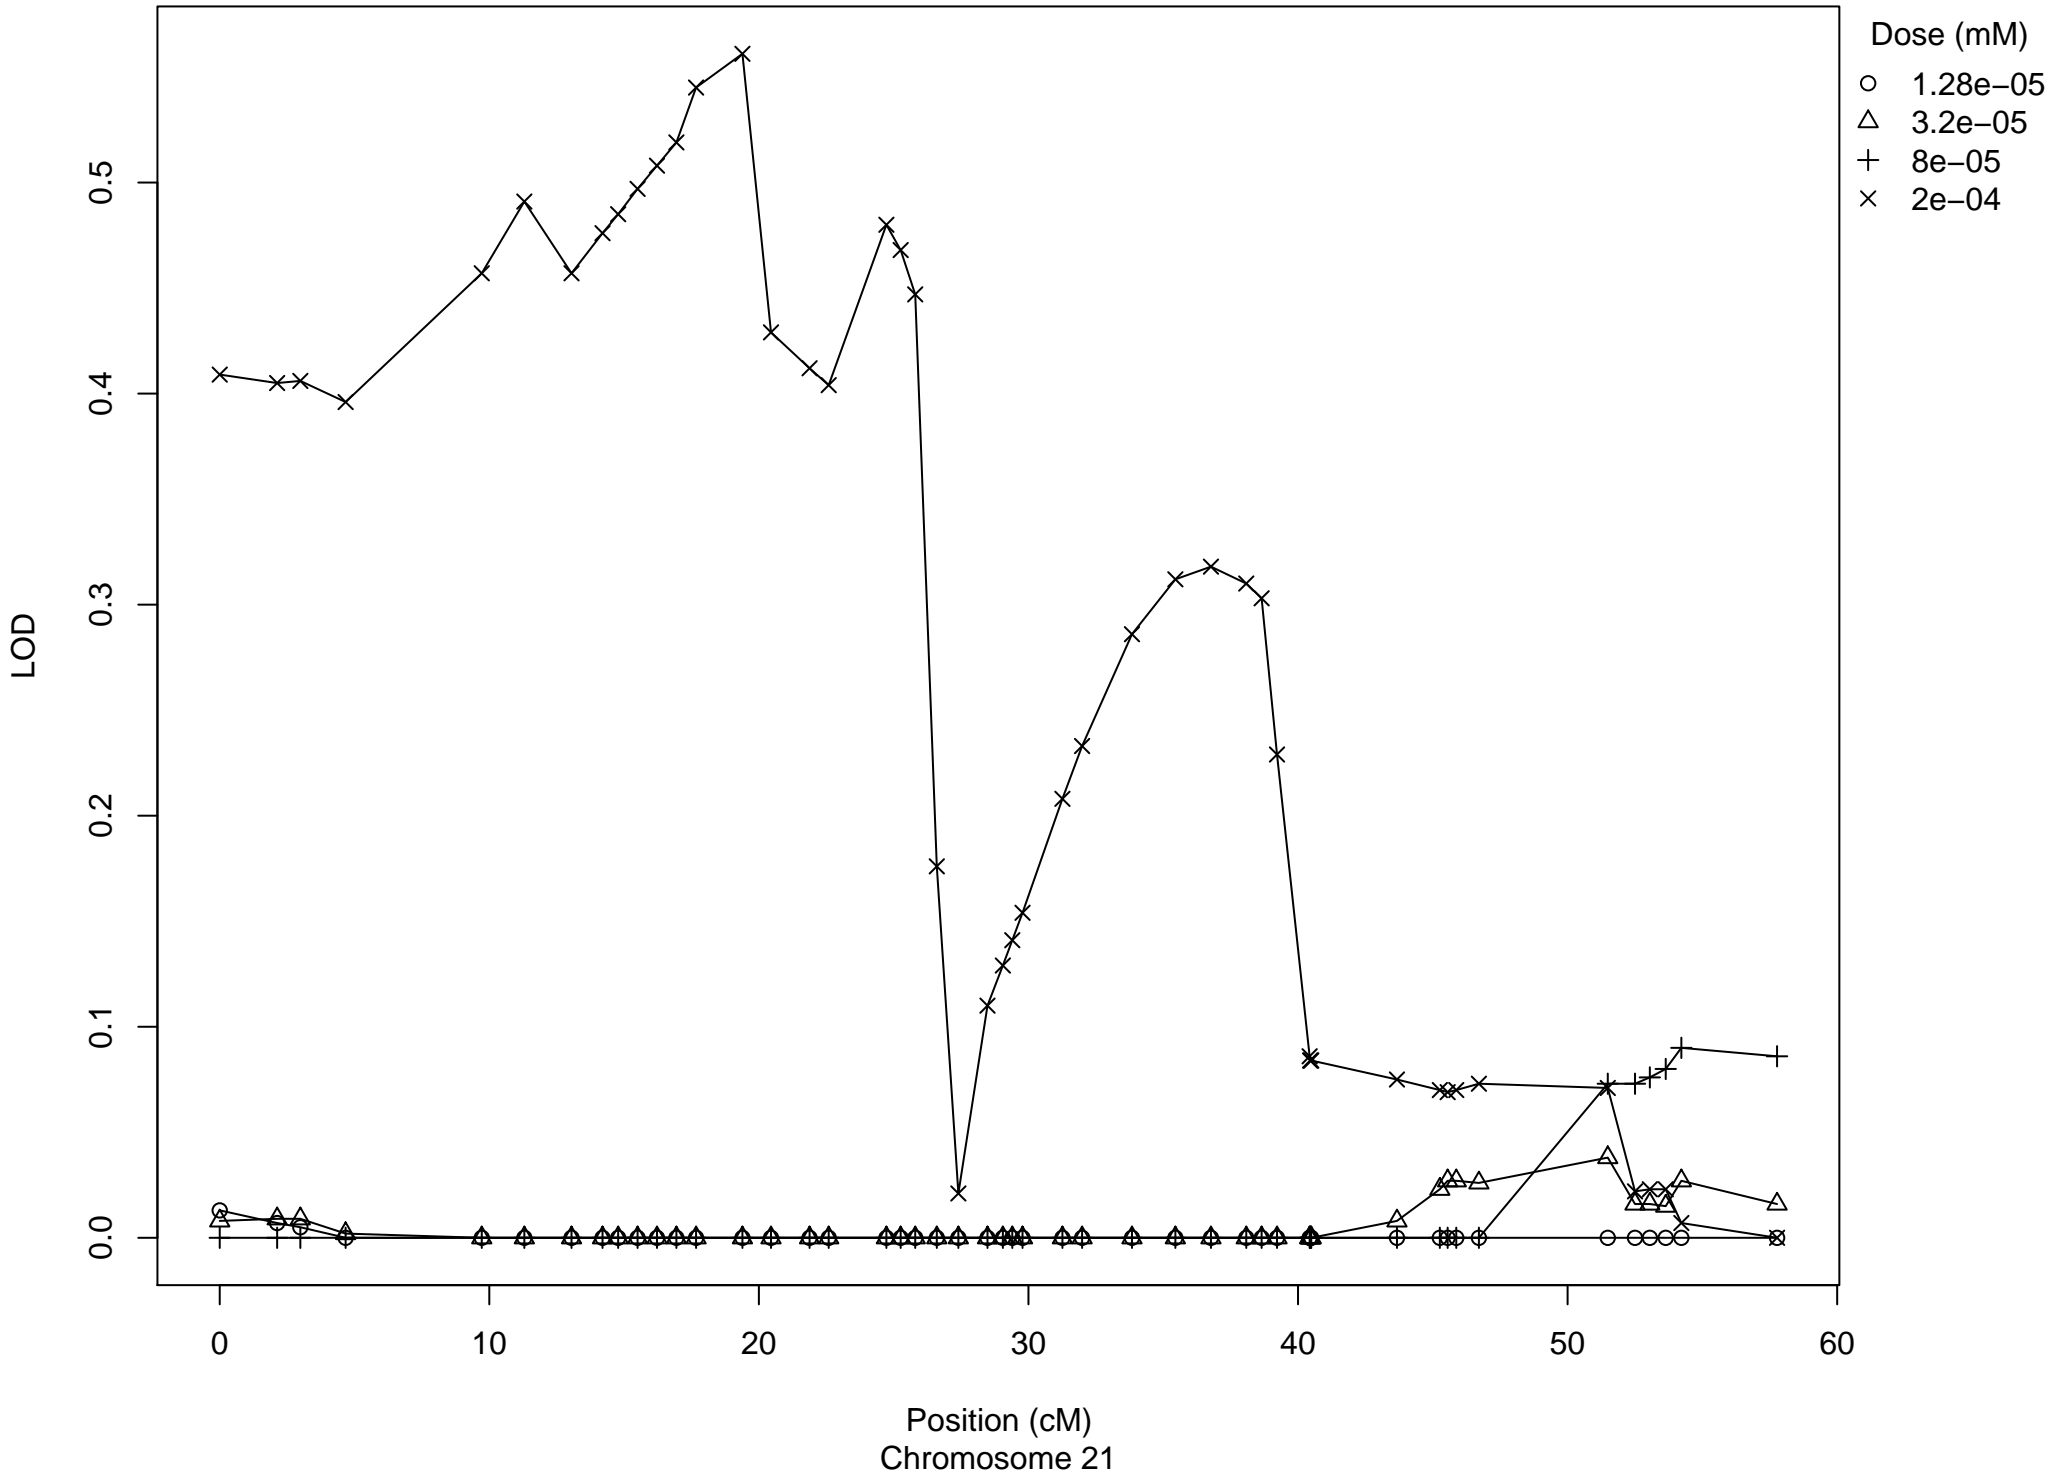

# Docetaxel (Doc)

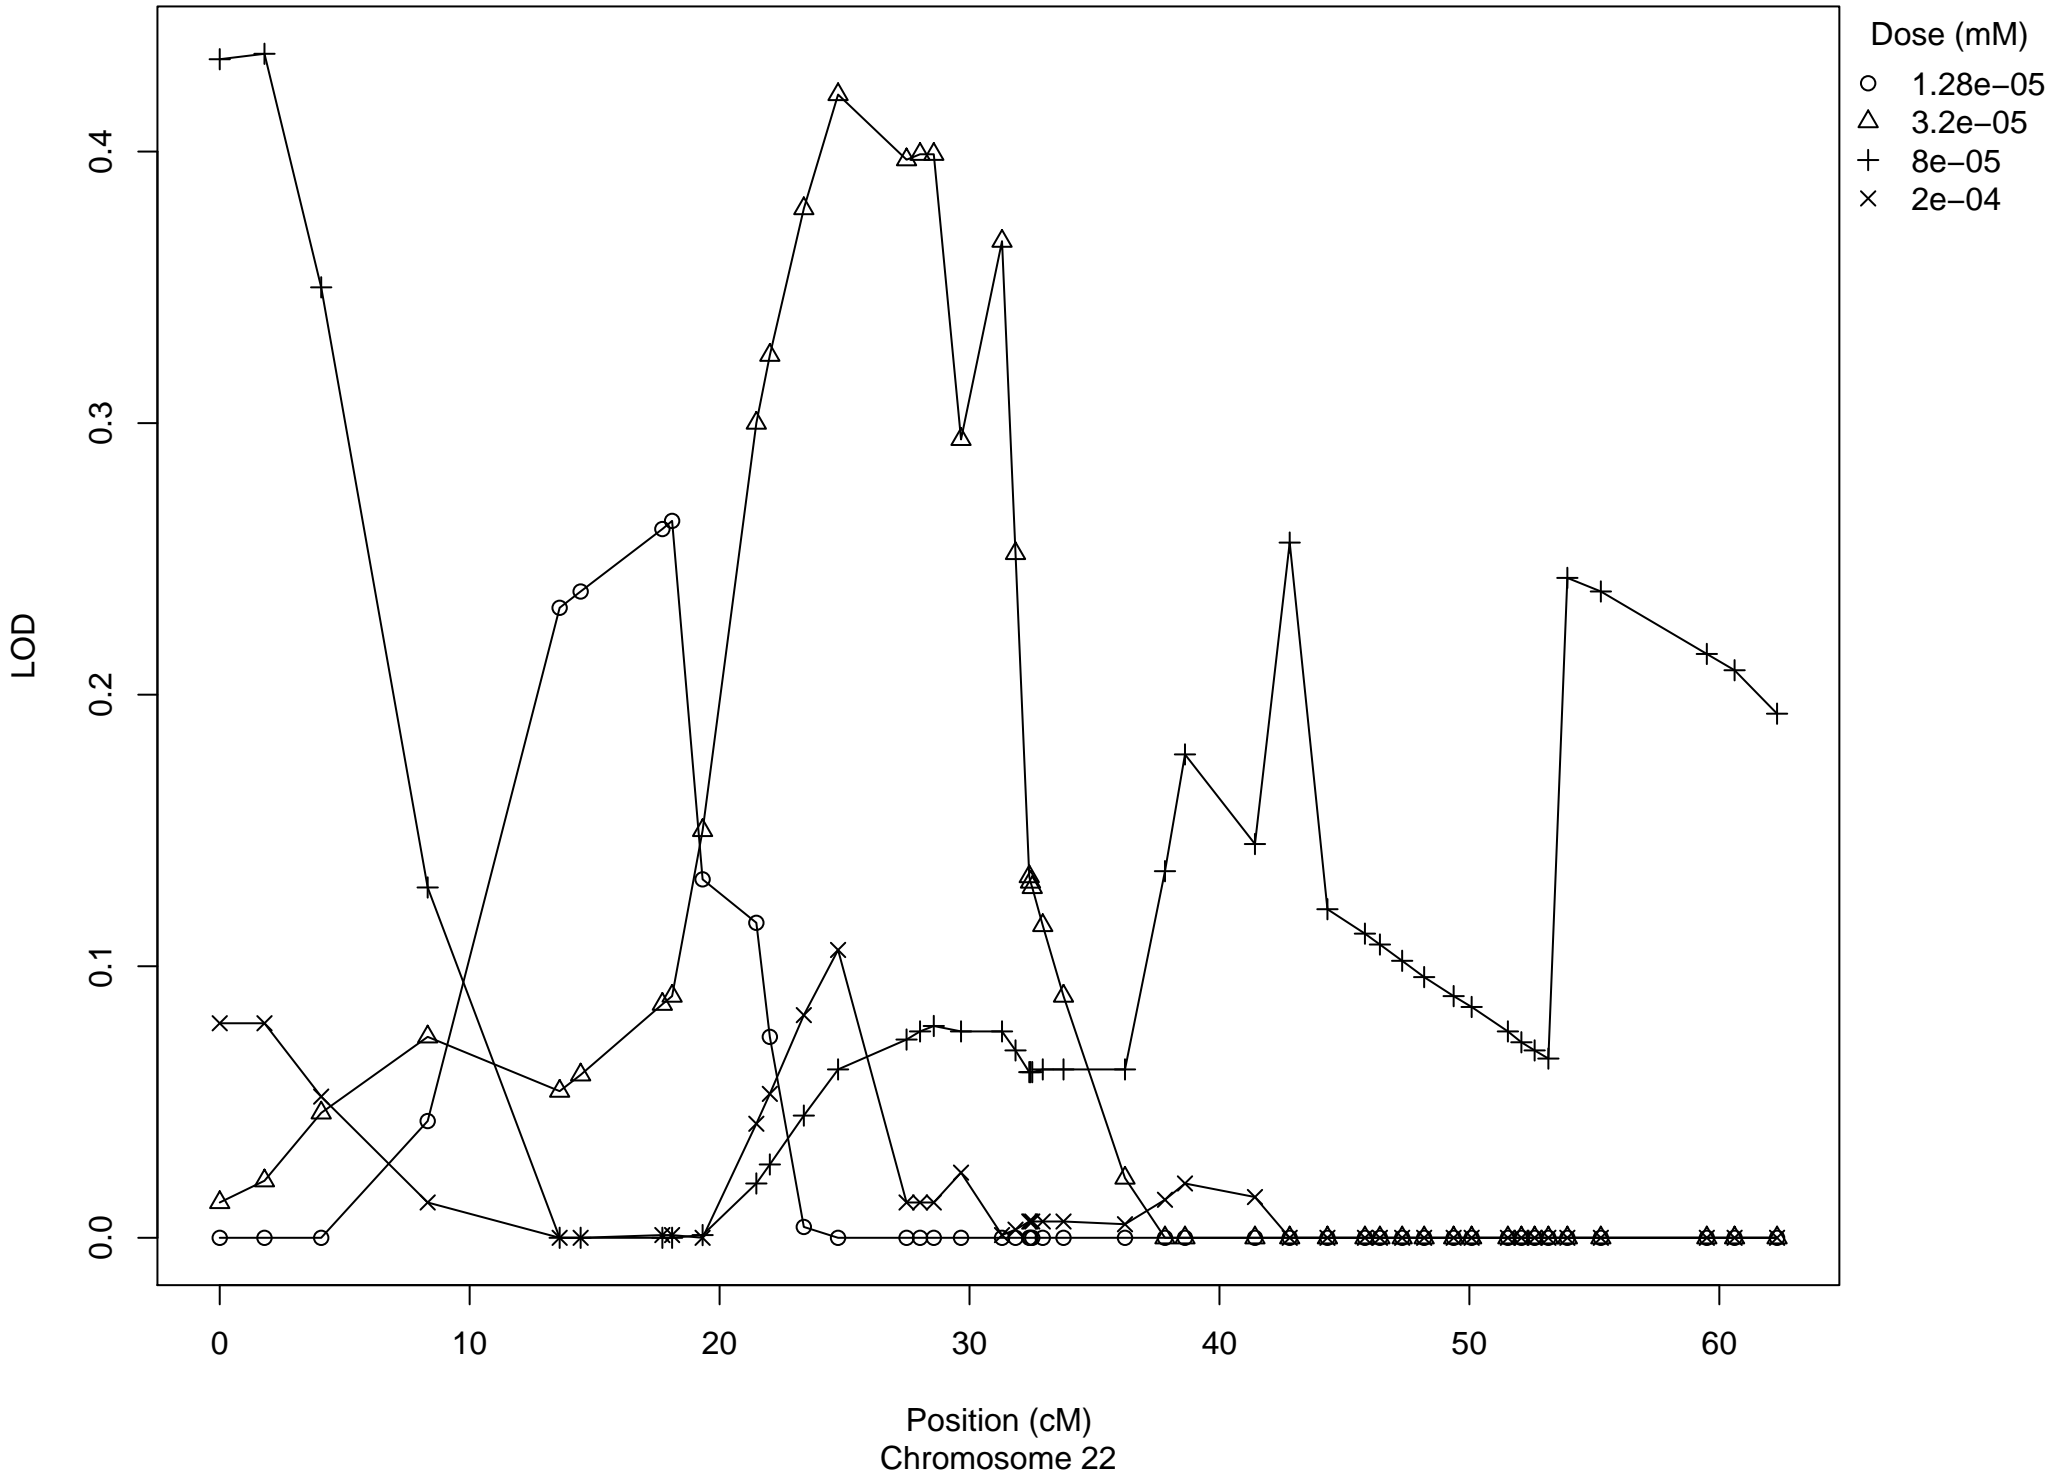



# doxorubicin hydrochloride (Dox)

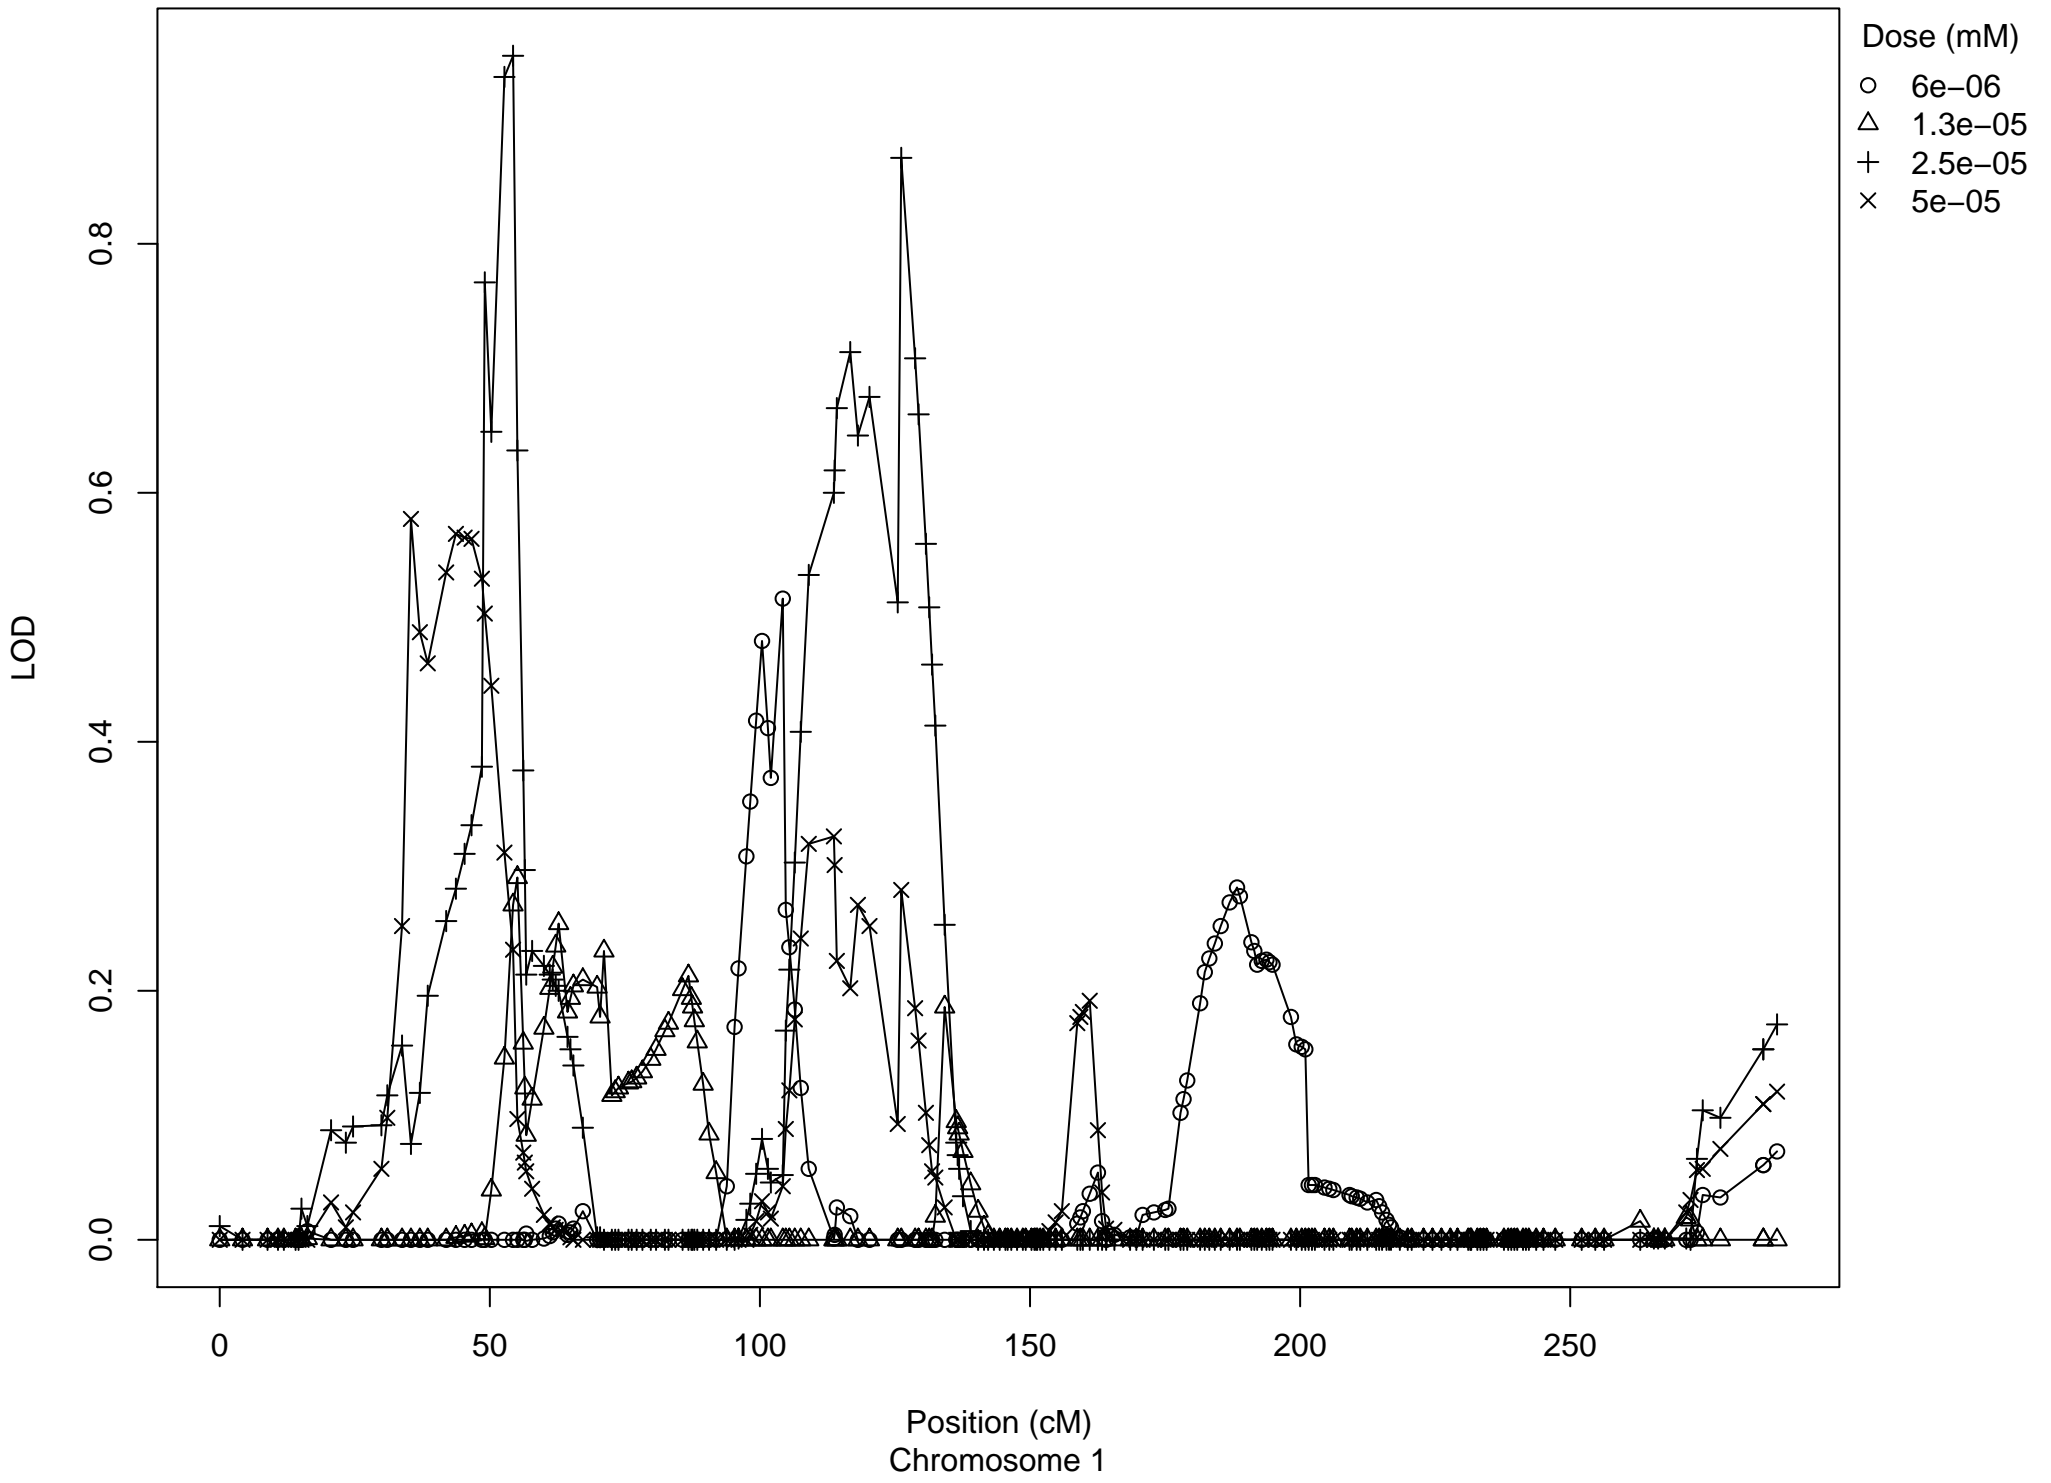

# doxorubicin hydrochloride (Dox)

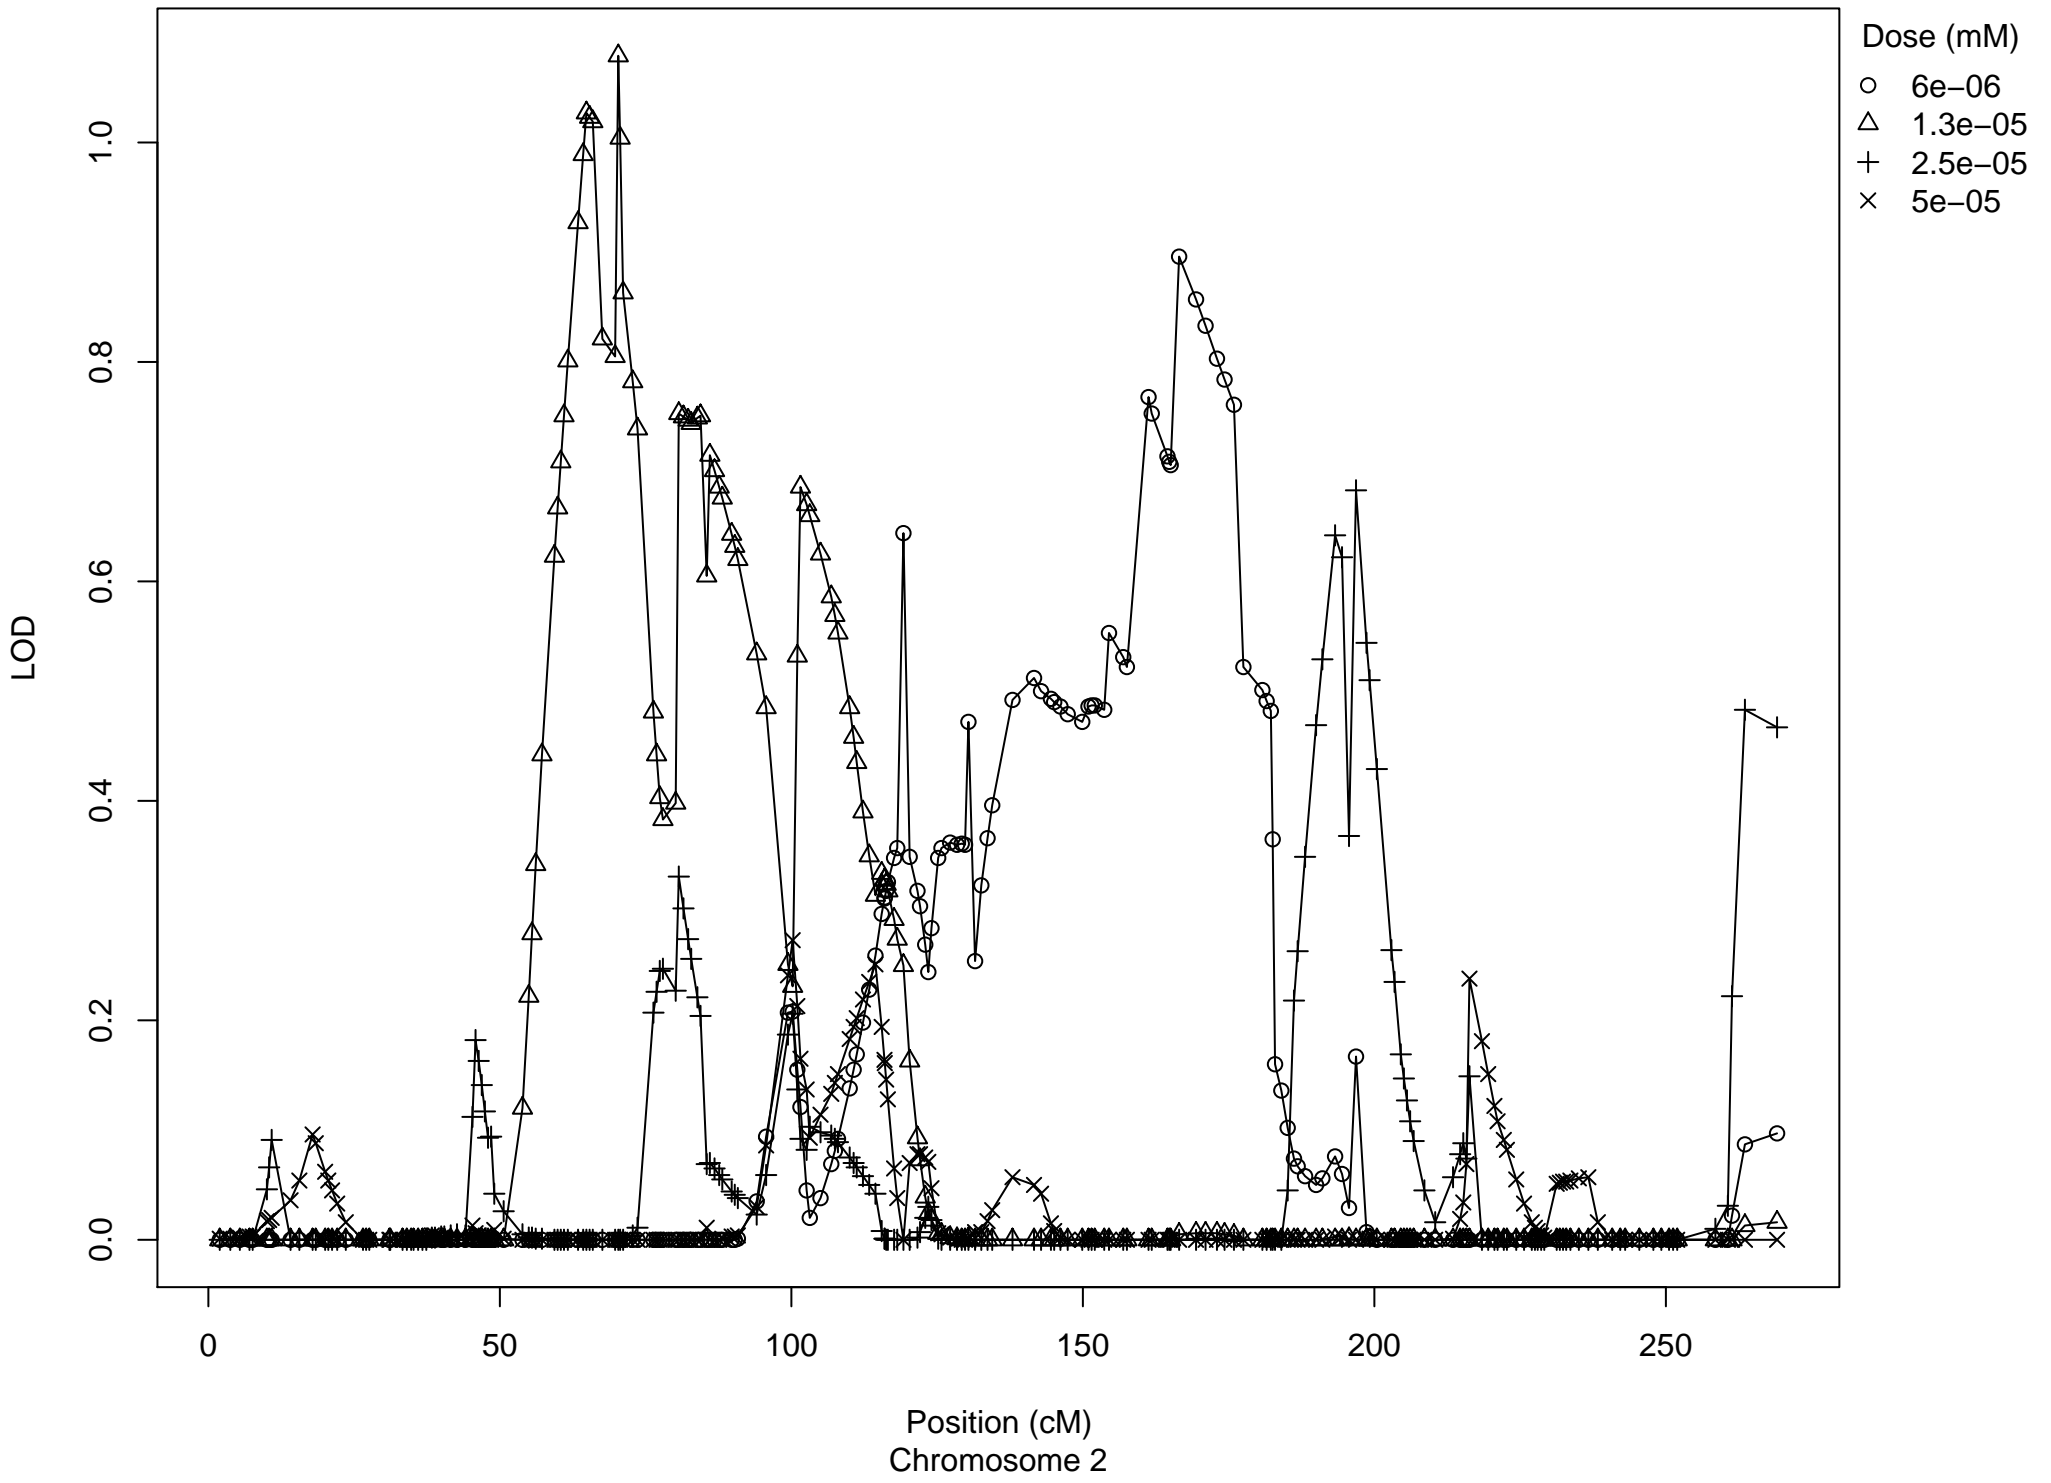

# doxorubicin hydrochloride (Dox)

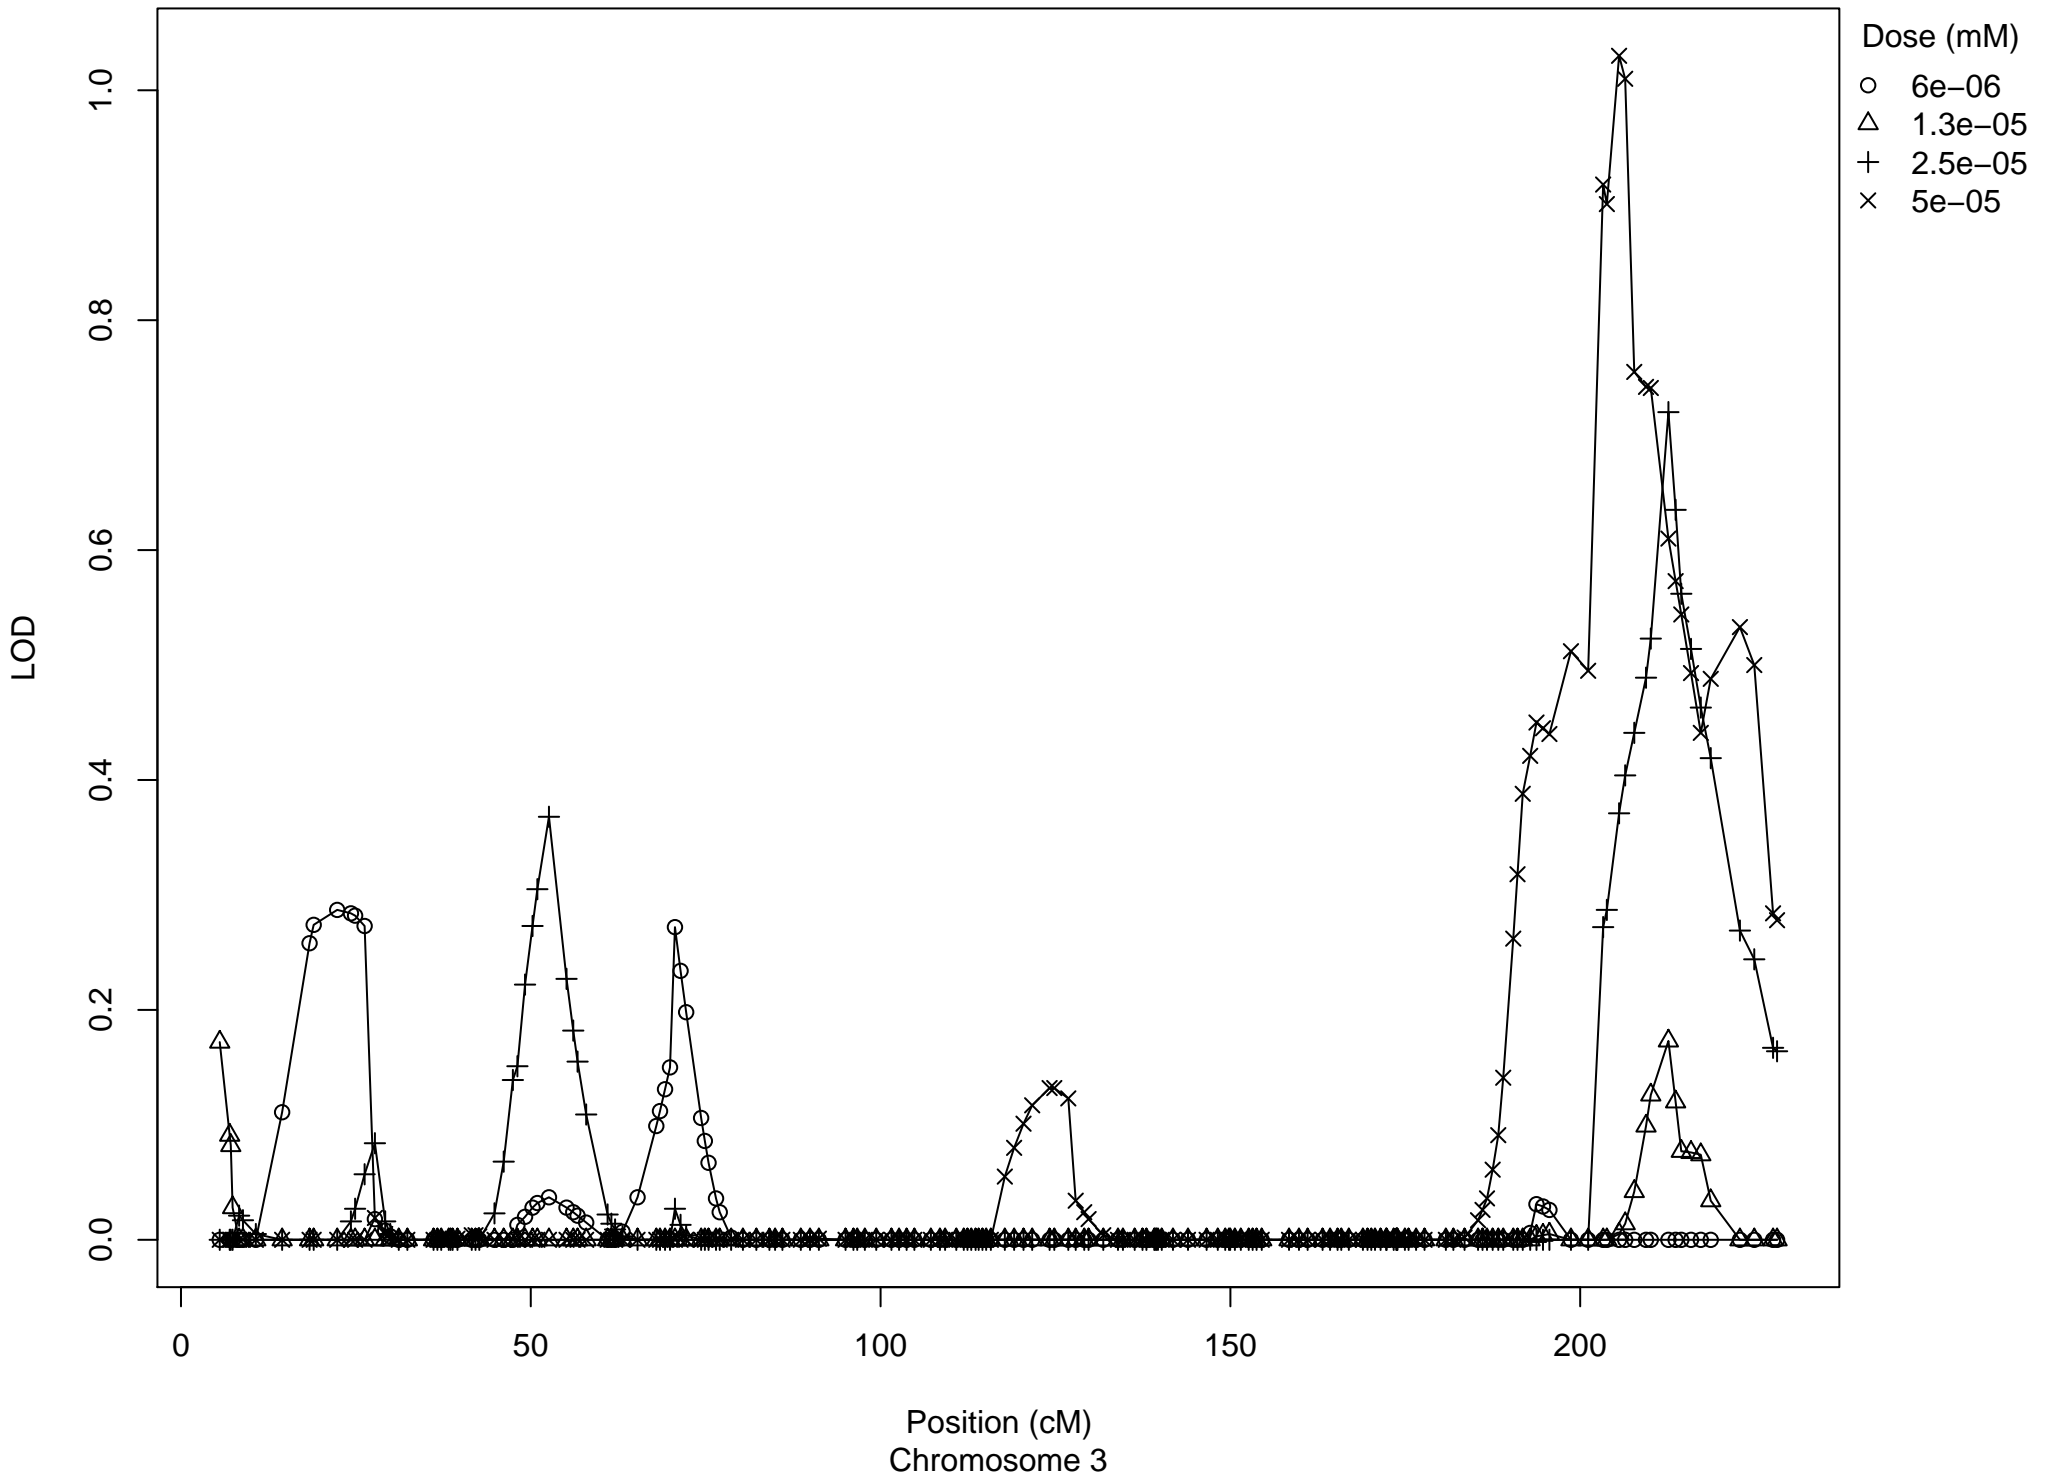

# doxorubicin hydrochloride (Dox)

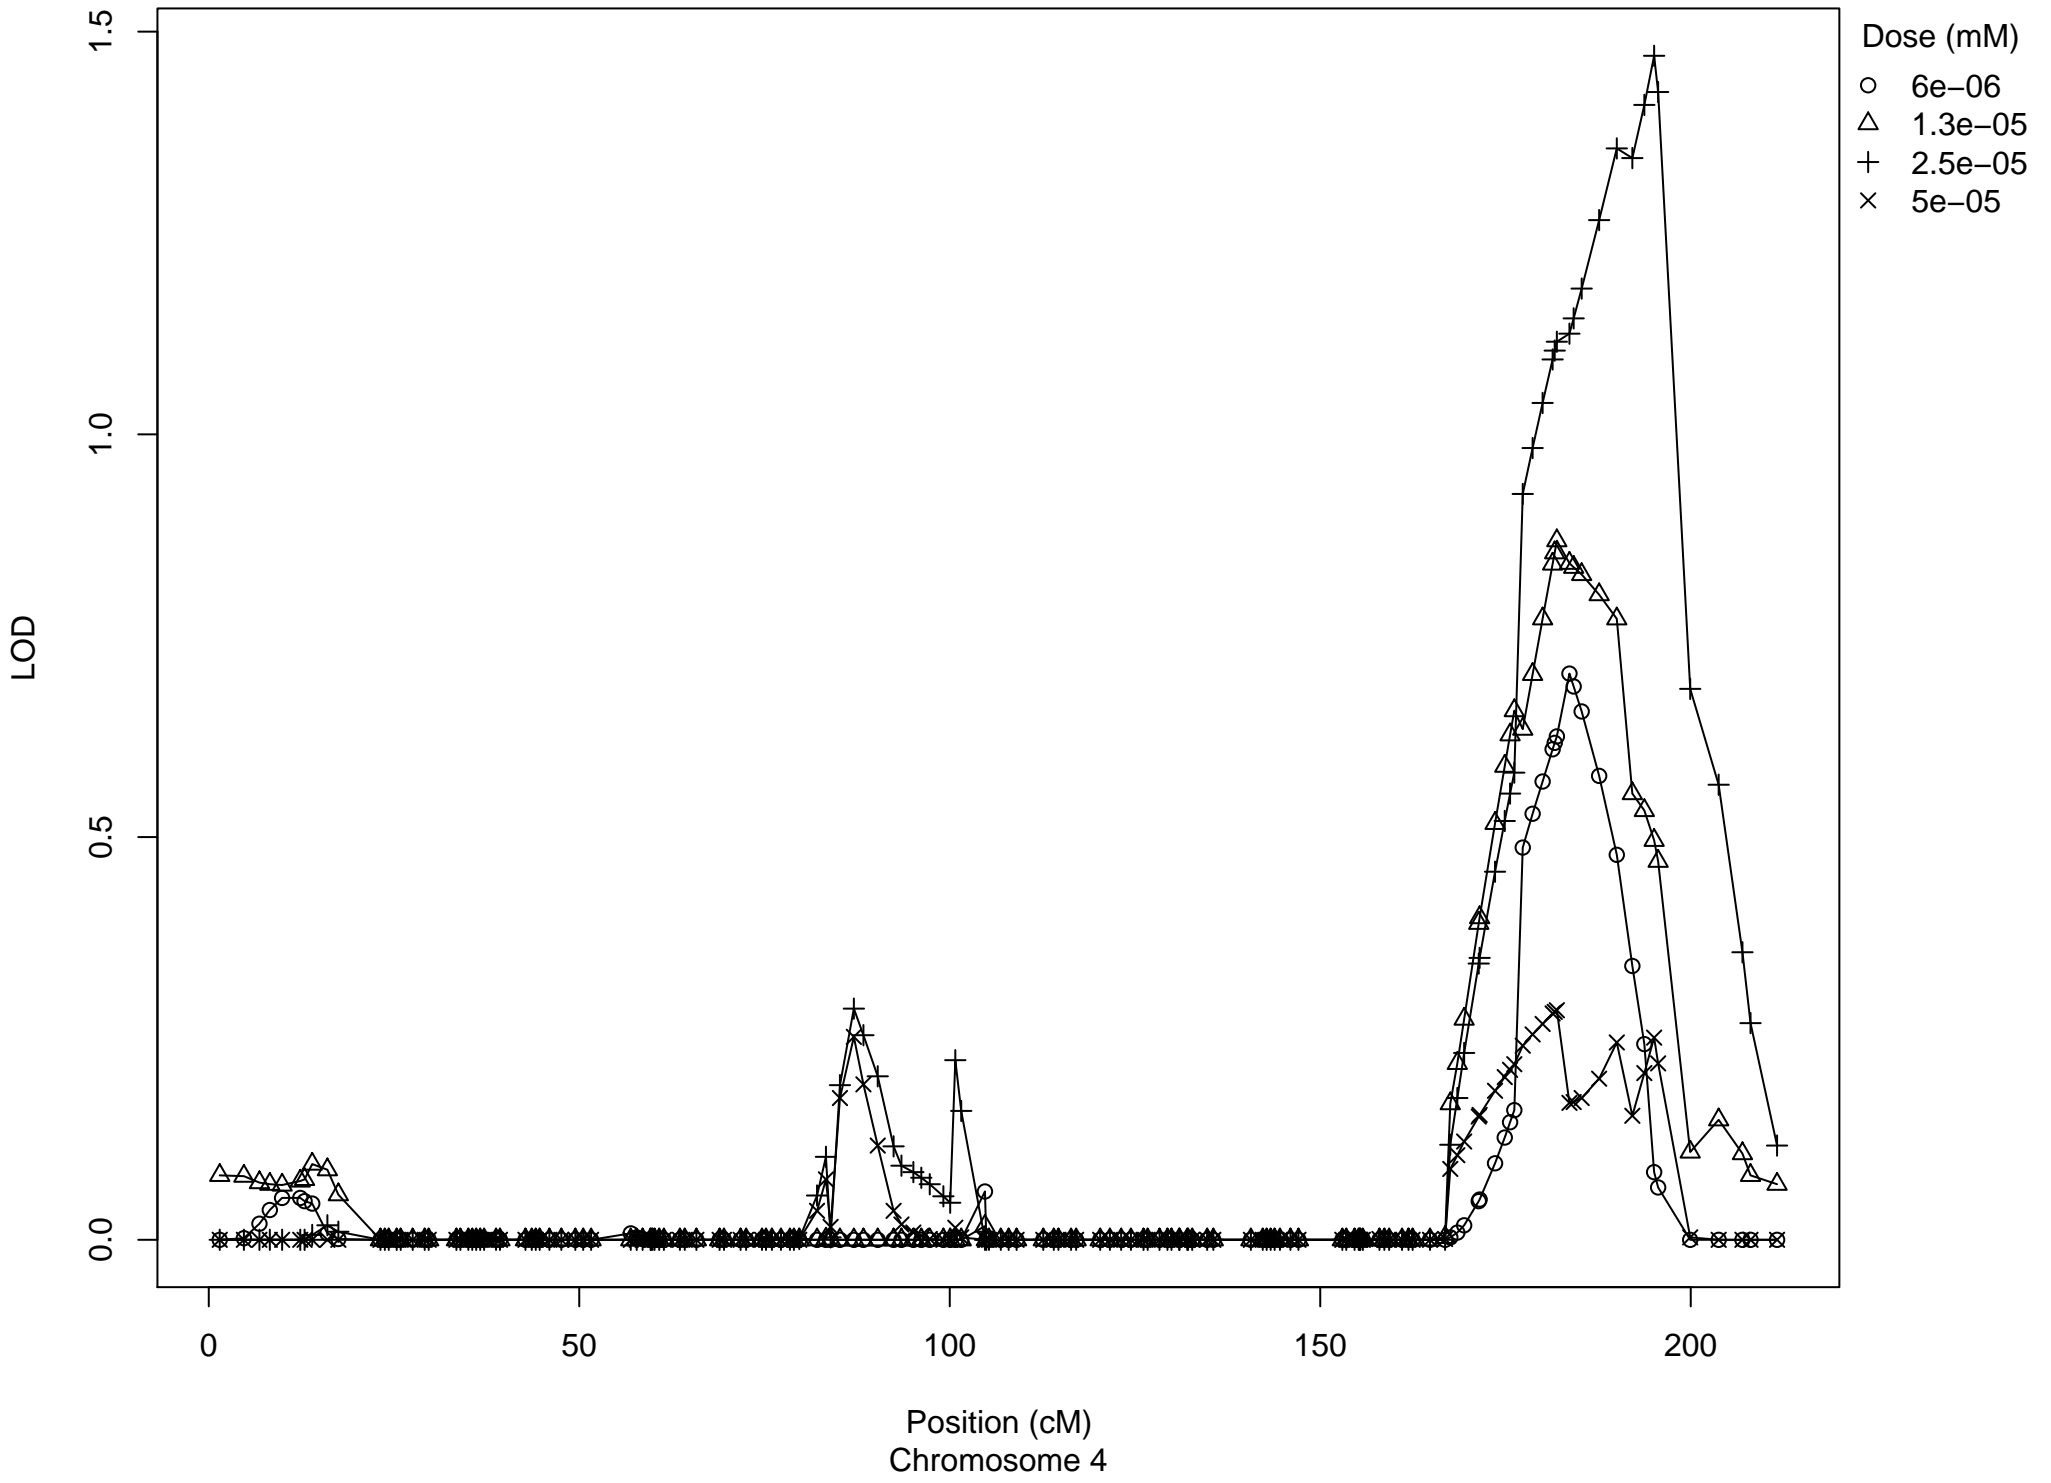

# doxorubicin hydrochloride (Dox)

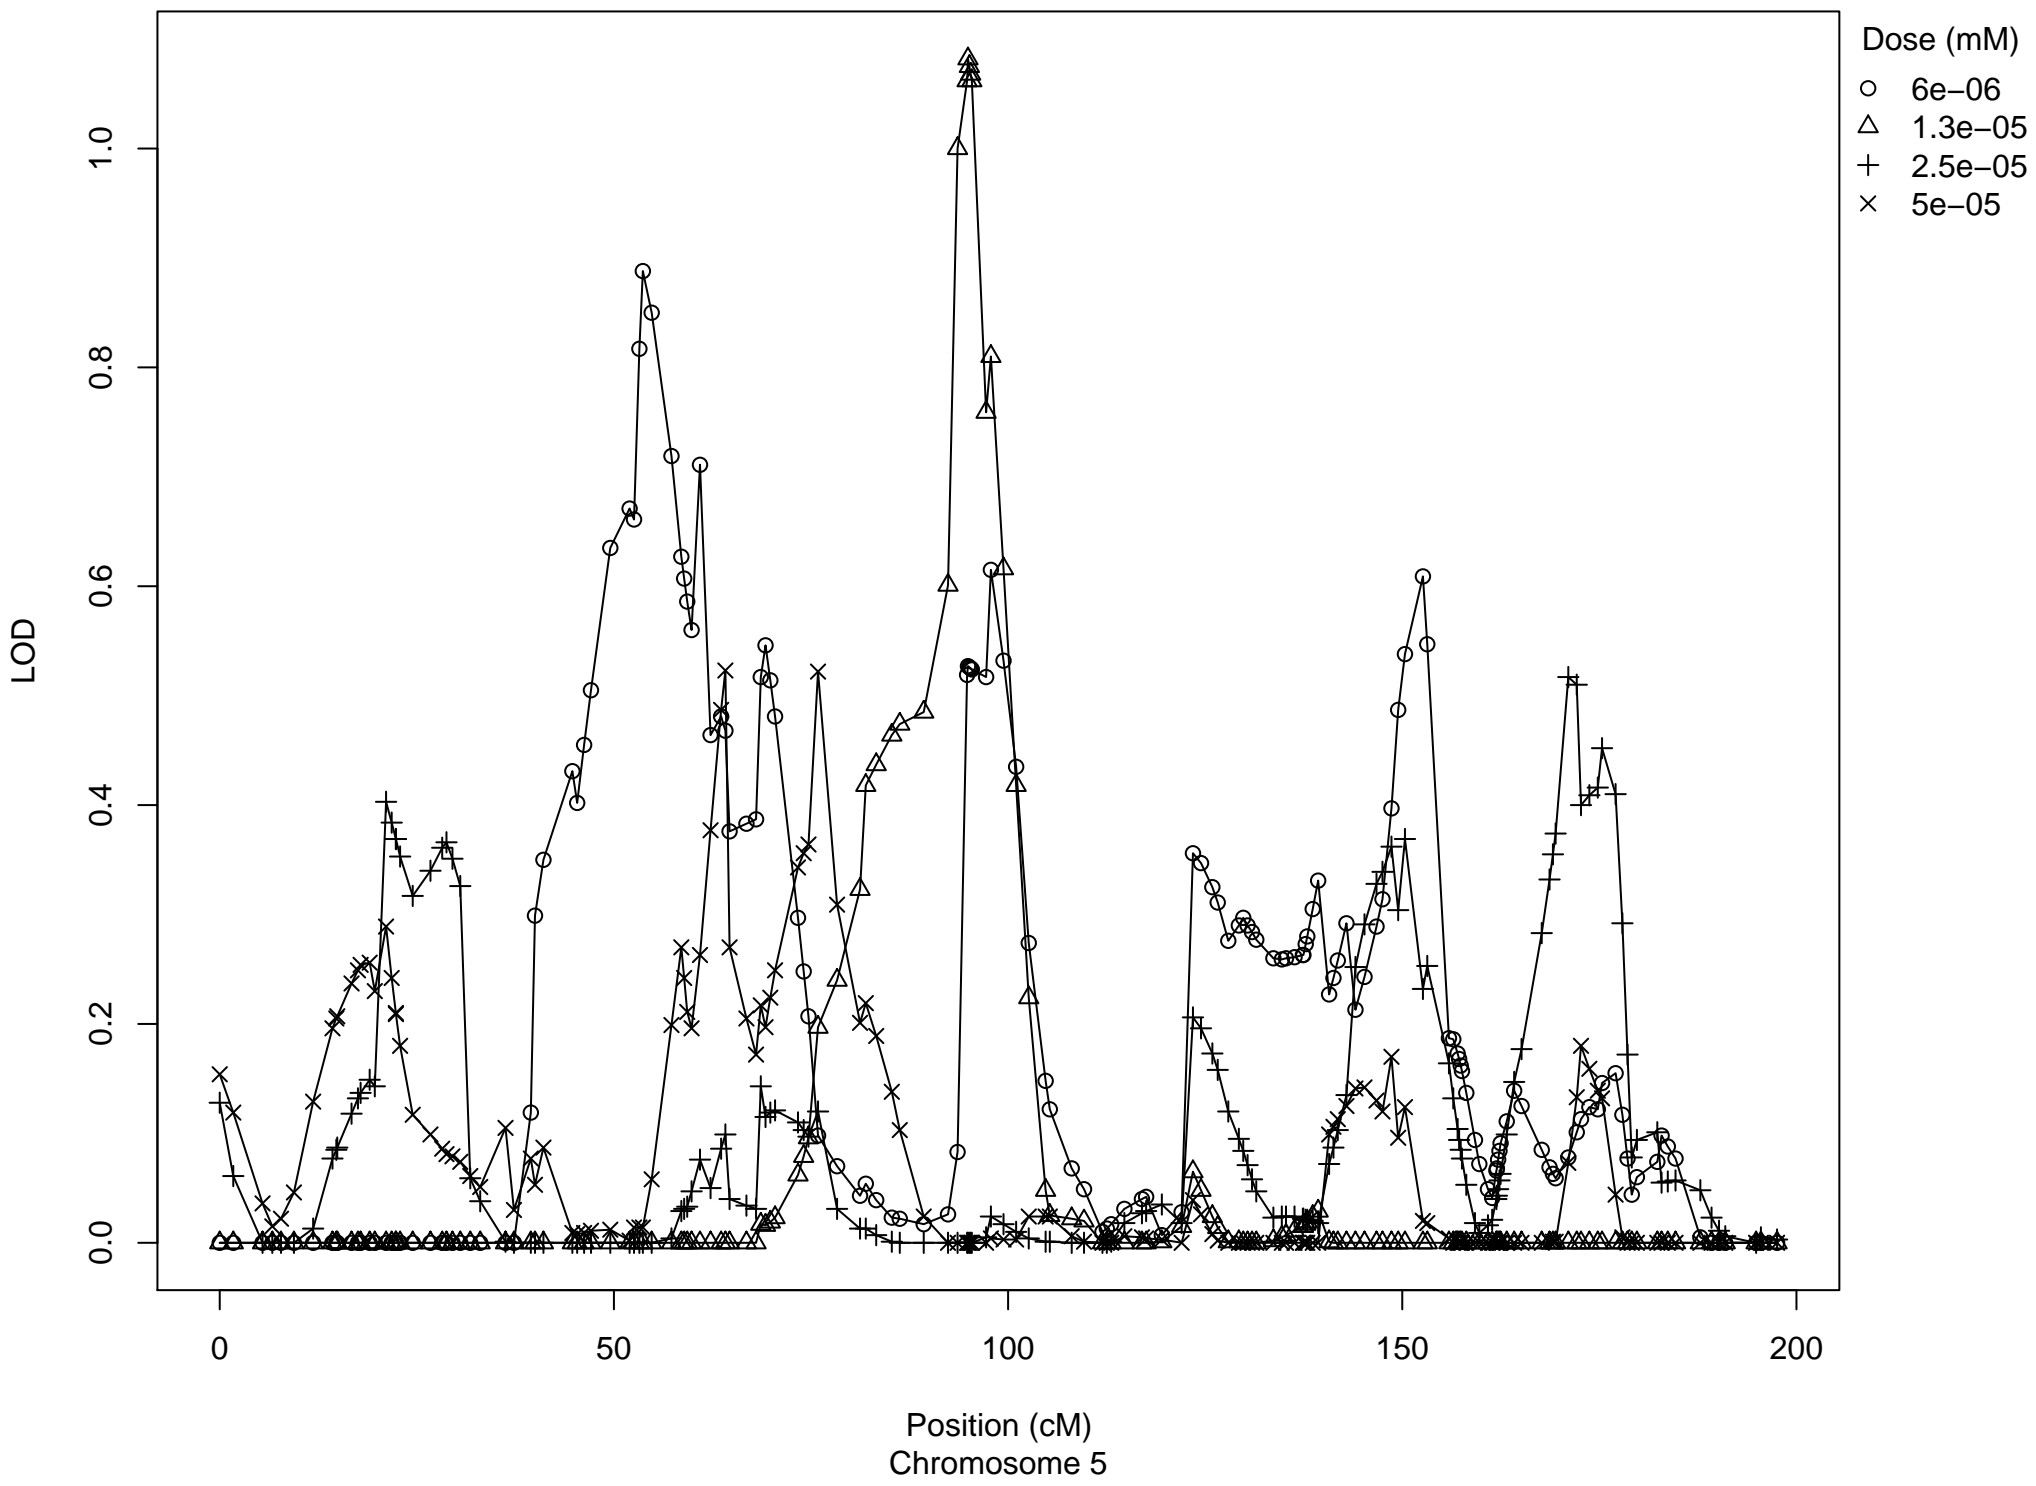

# doxorubicin hydrochloride (Dox)

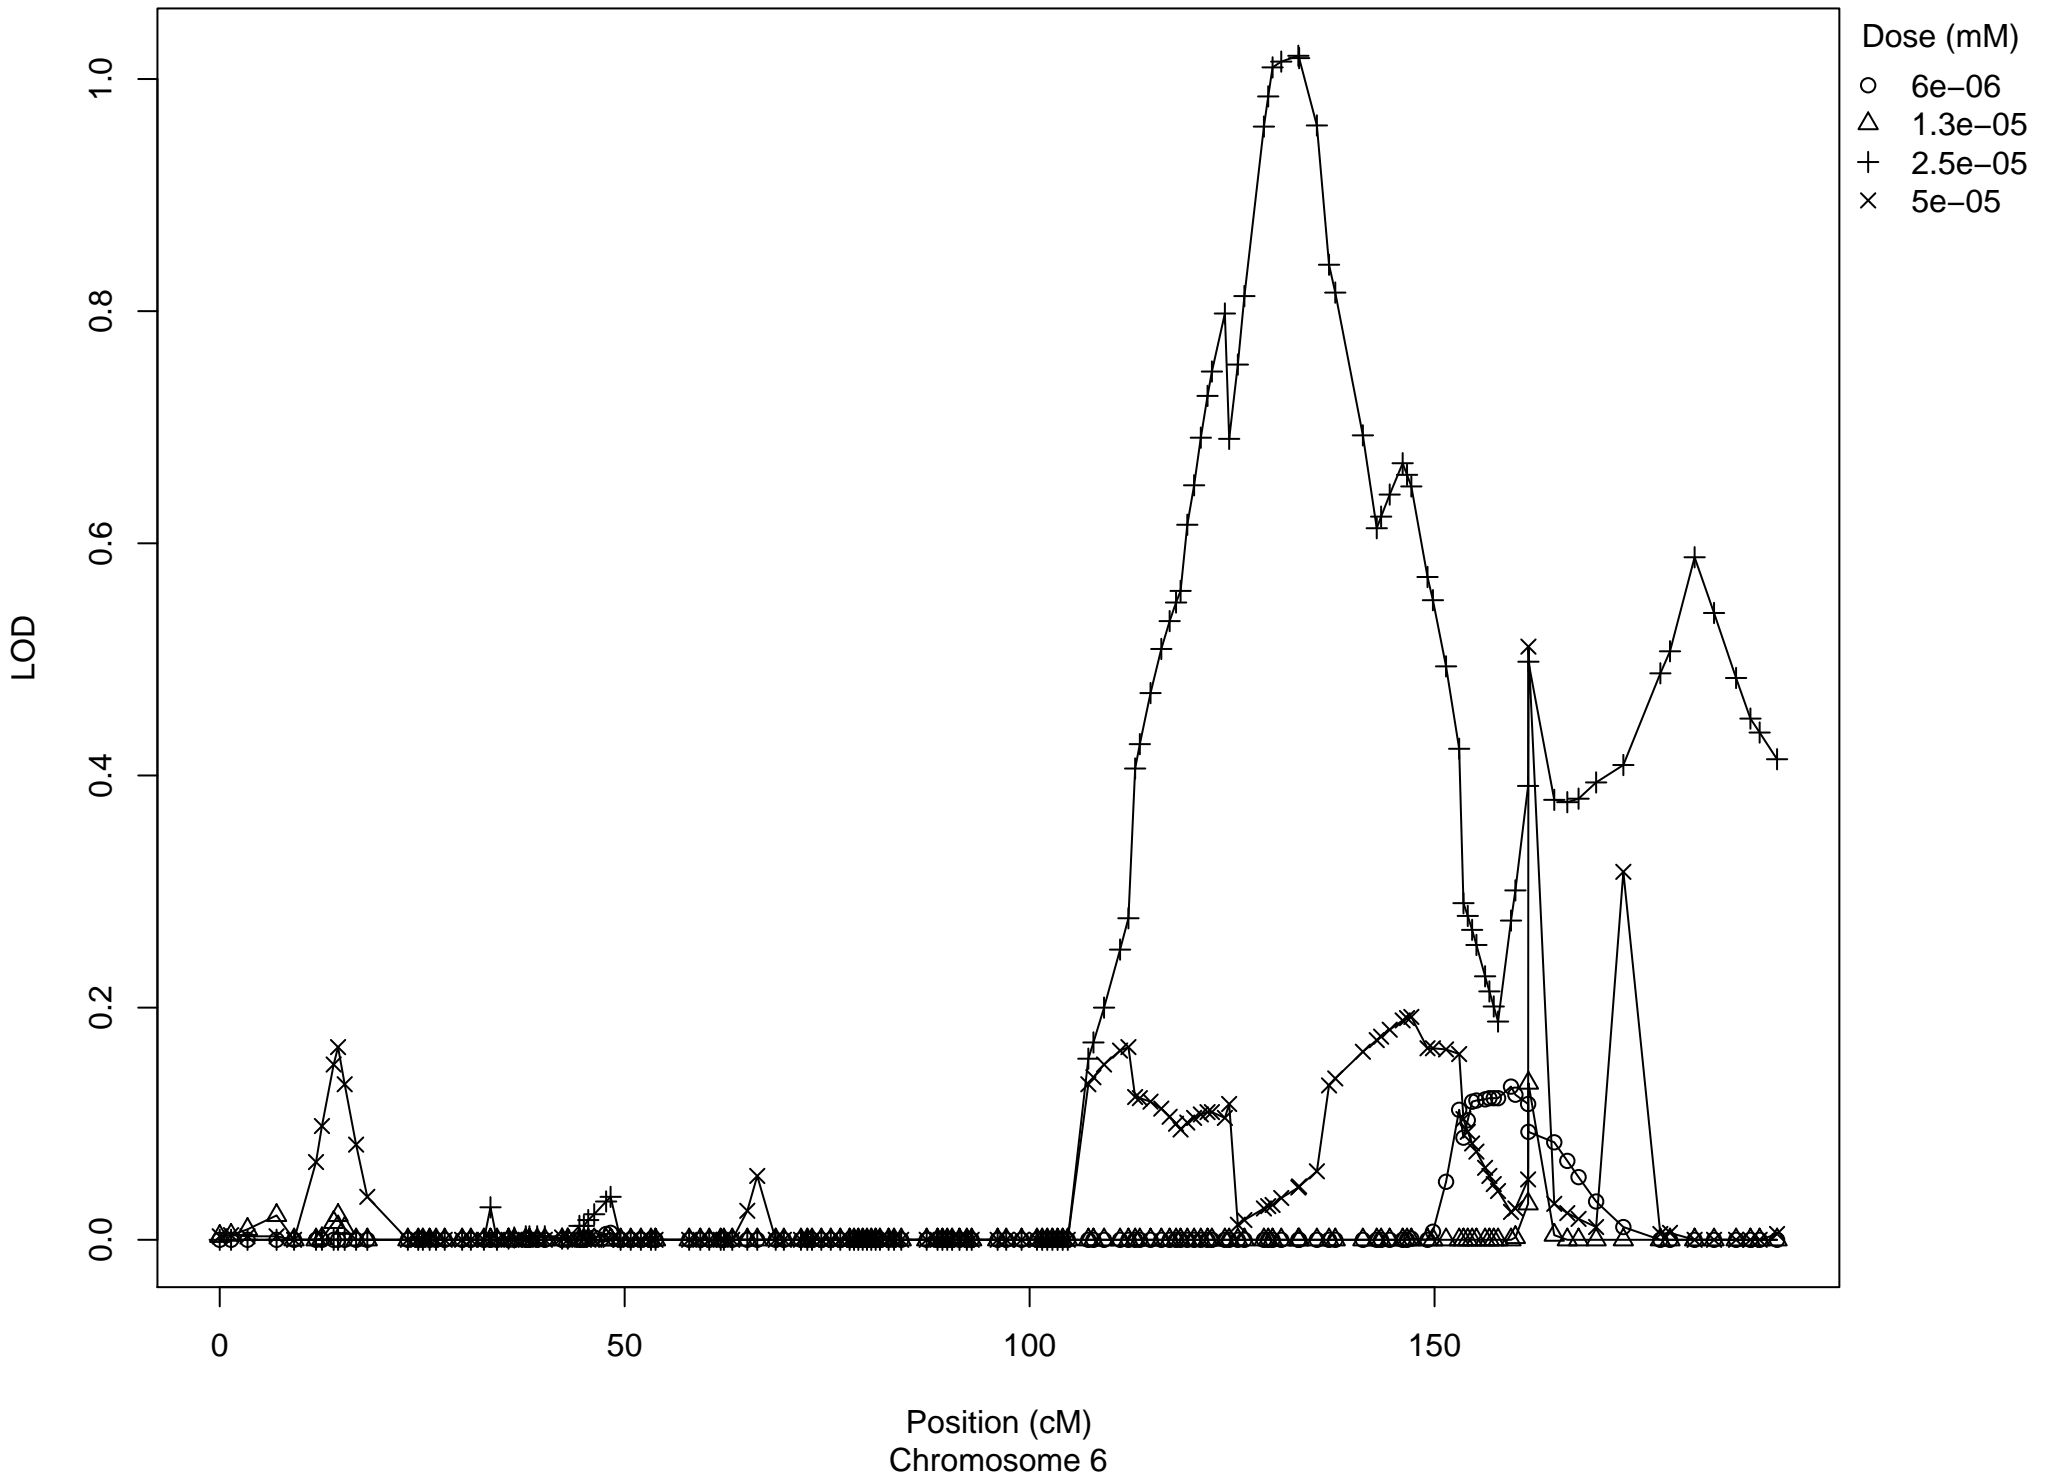

# doxorubicin hydrochloride (Dox)

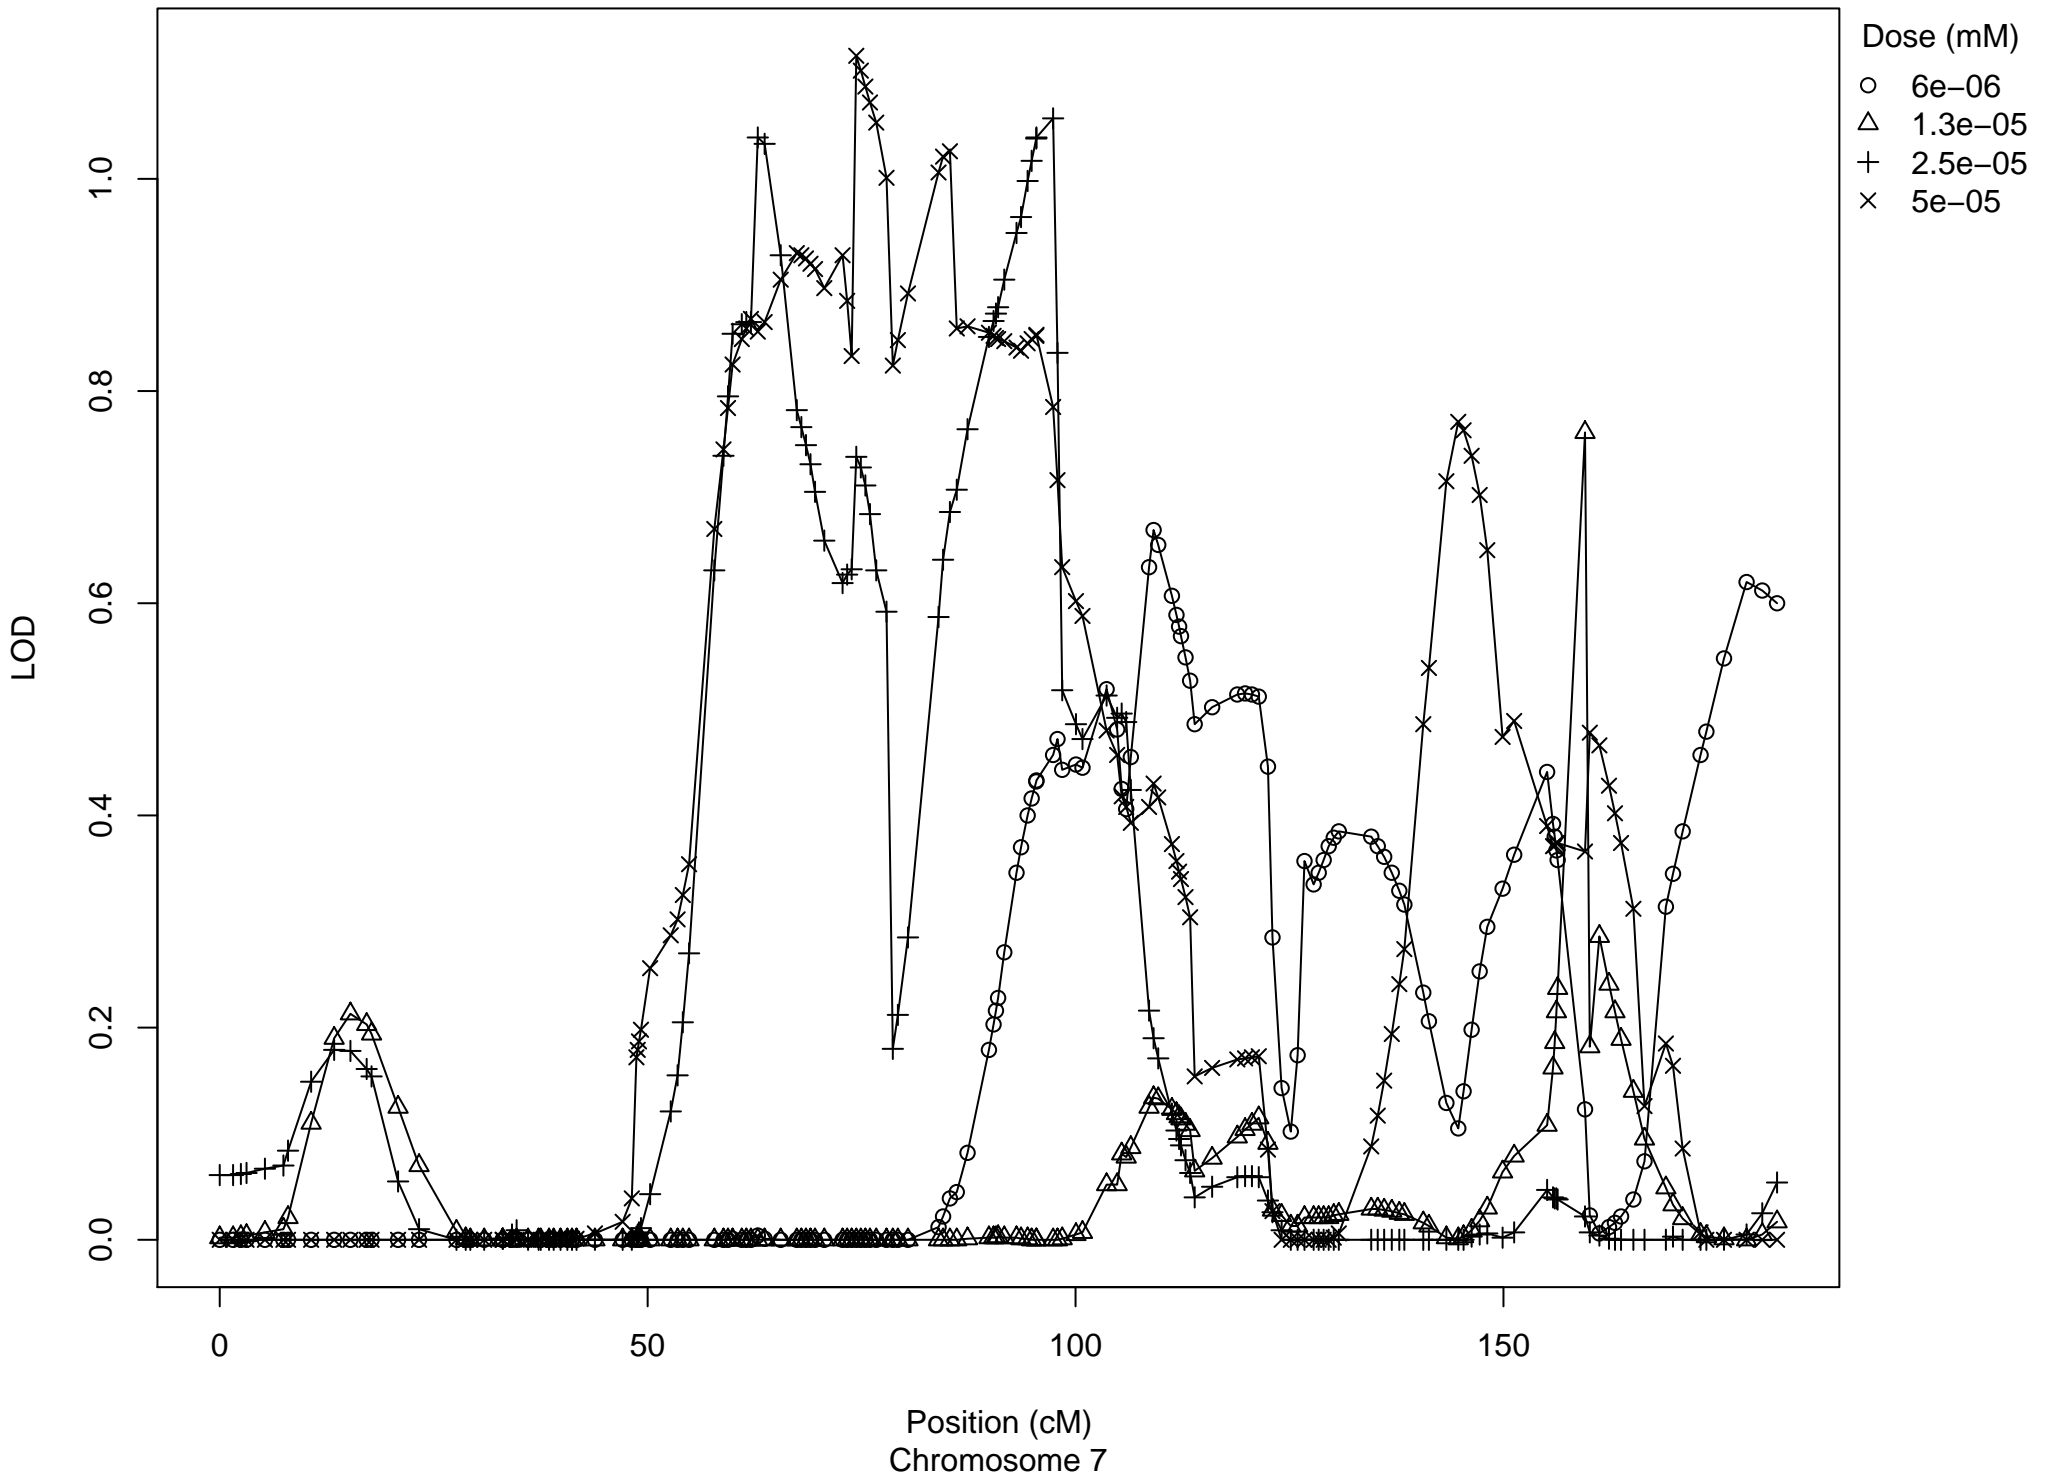

# doxorubicin hydrochloride (Dox)

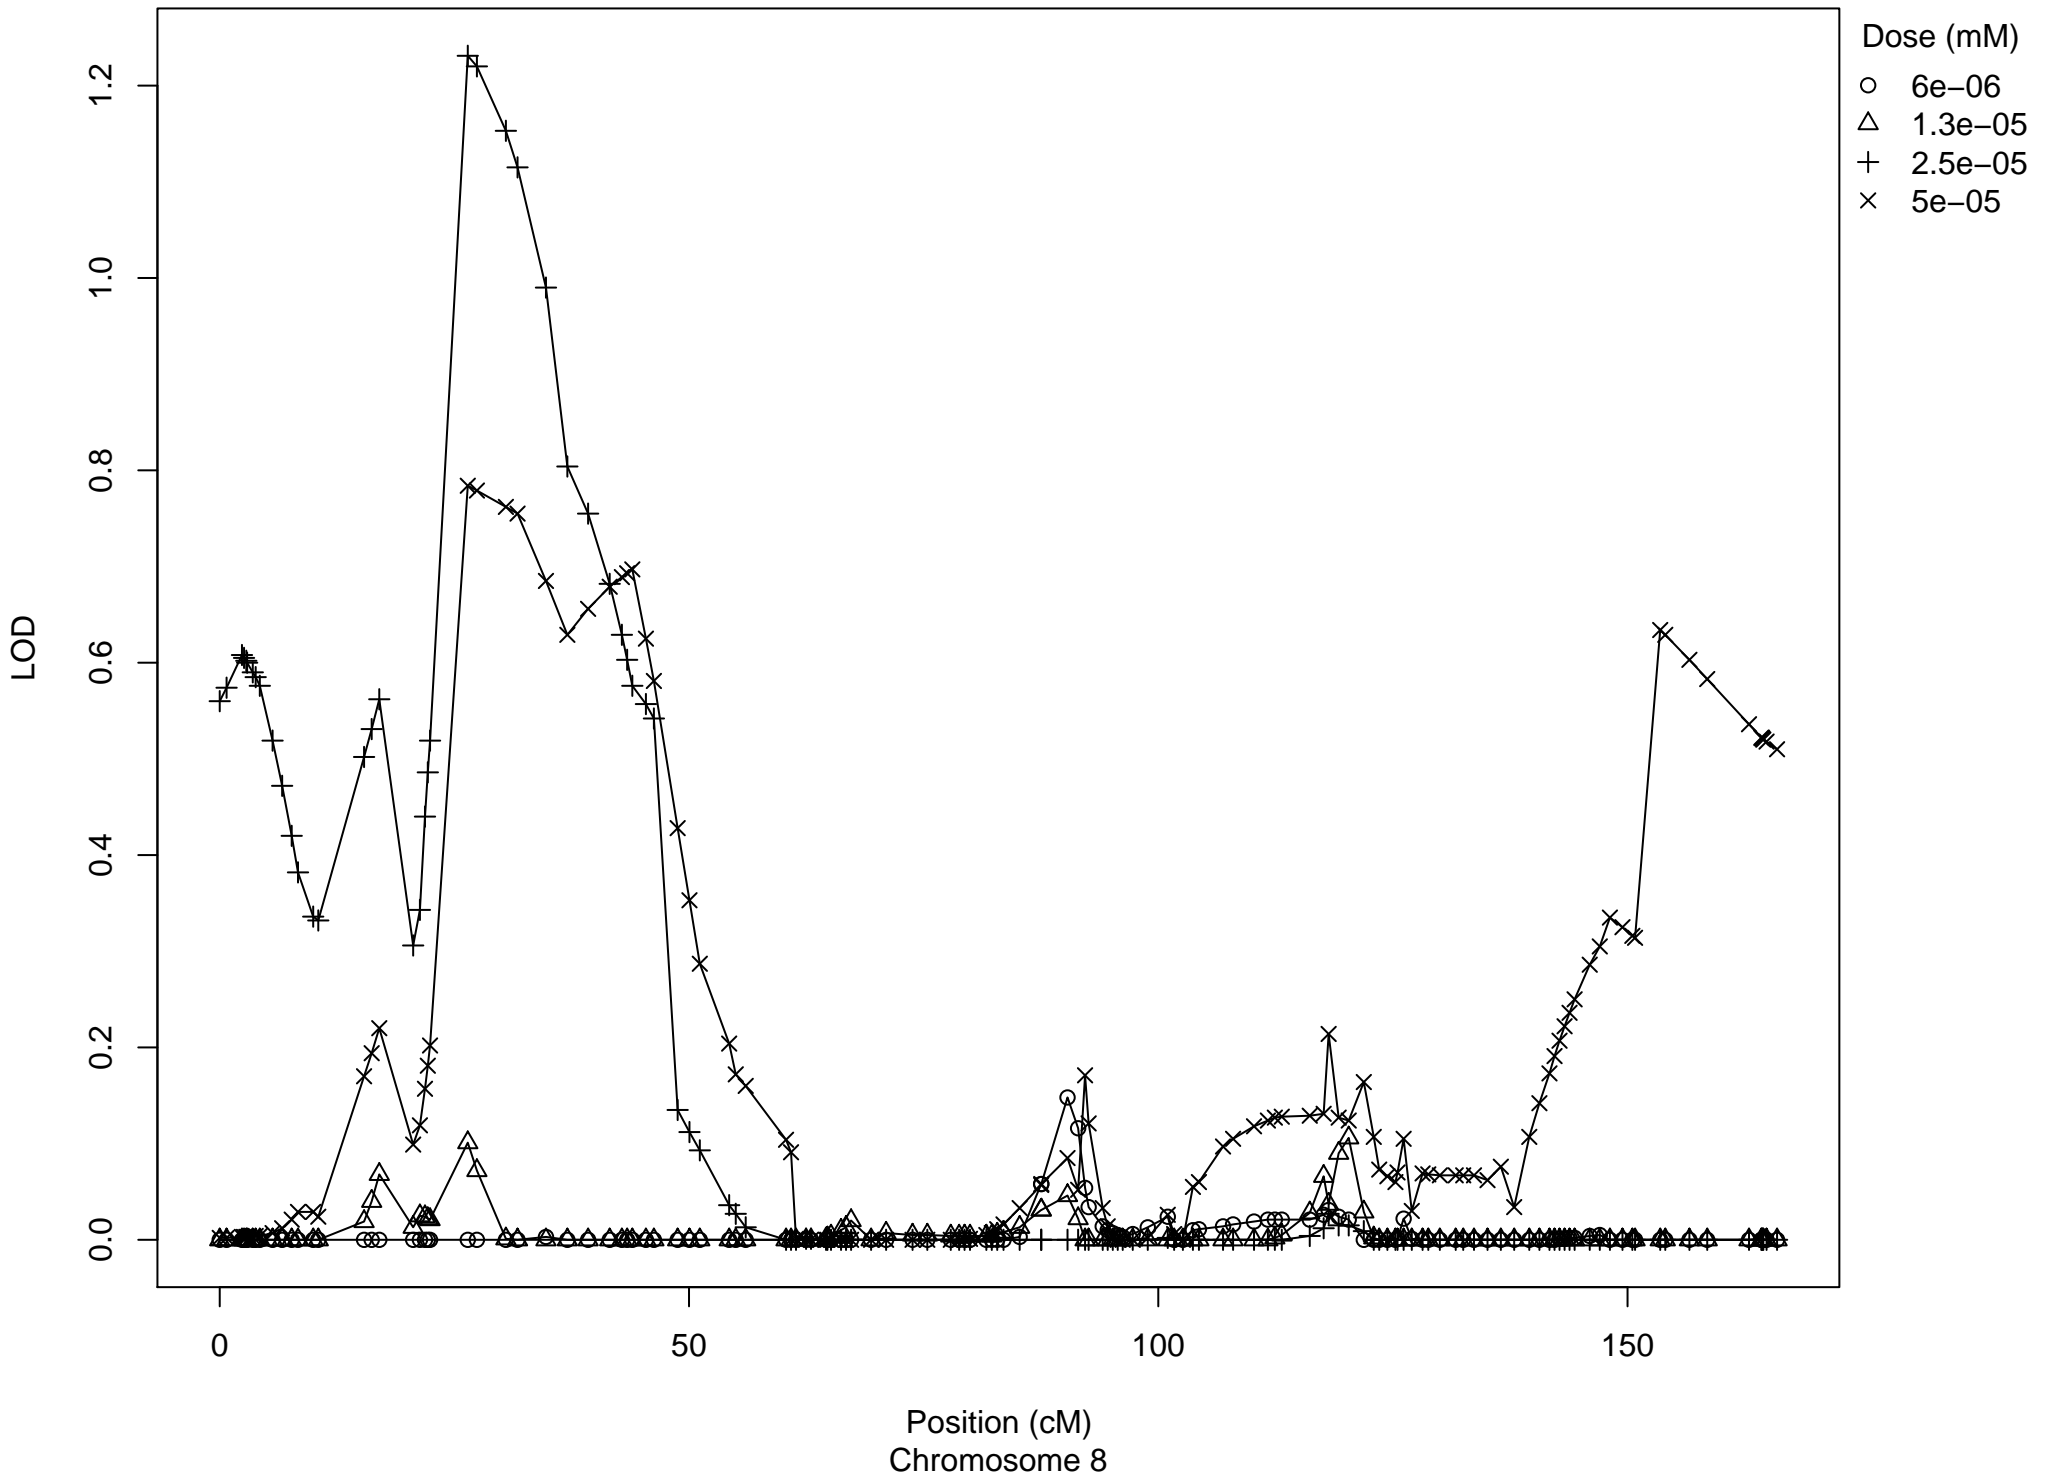



# doxorubicin hydrochloride (Dox)

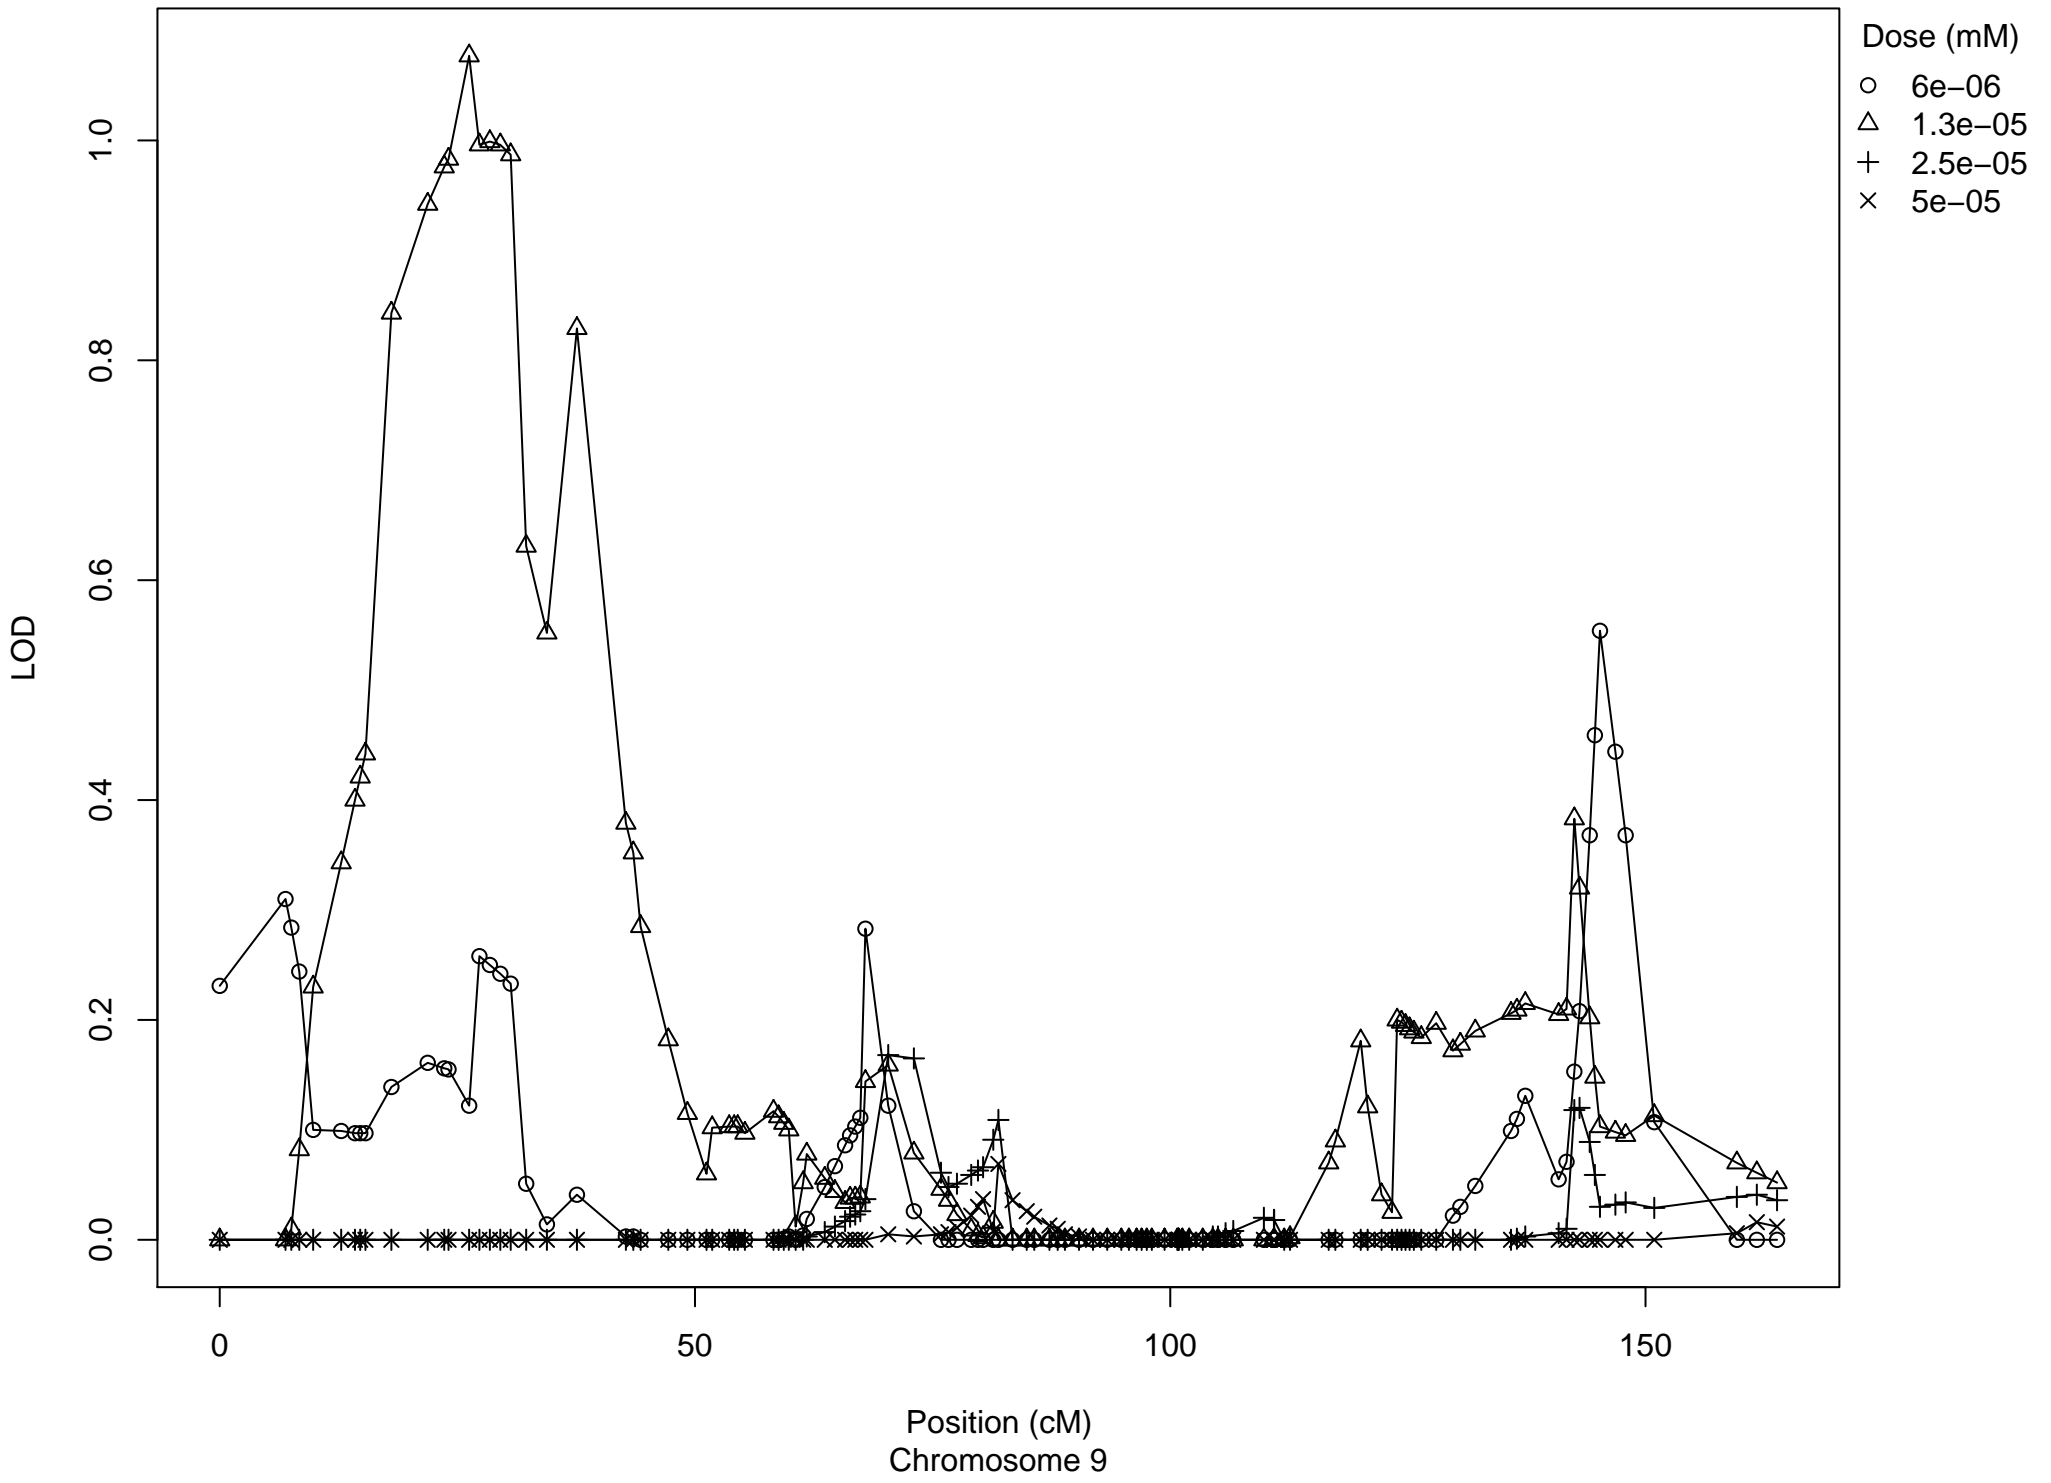

# doxorubicin hydrochloride (Dox)

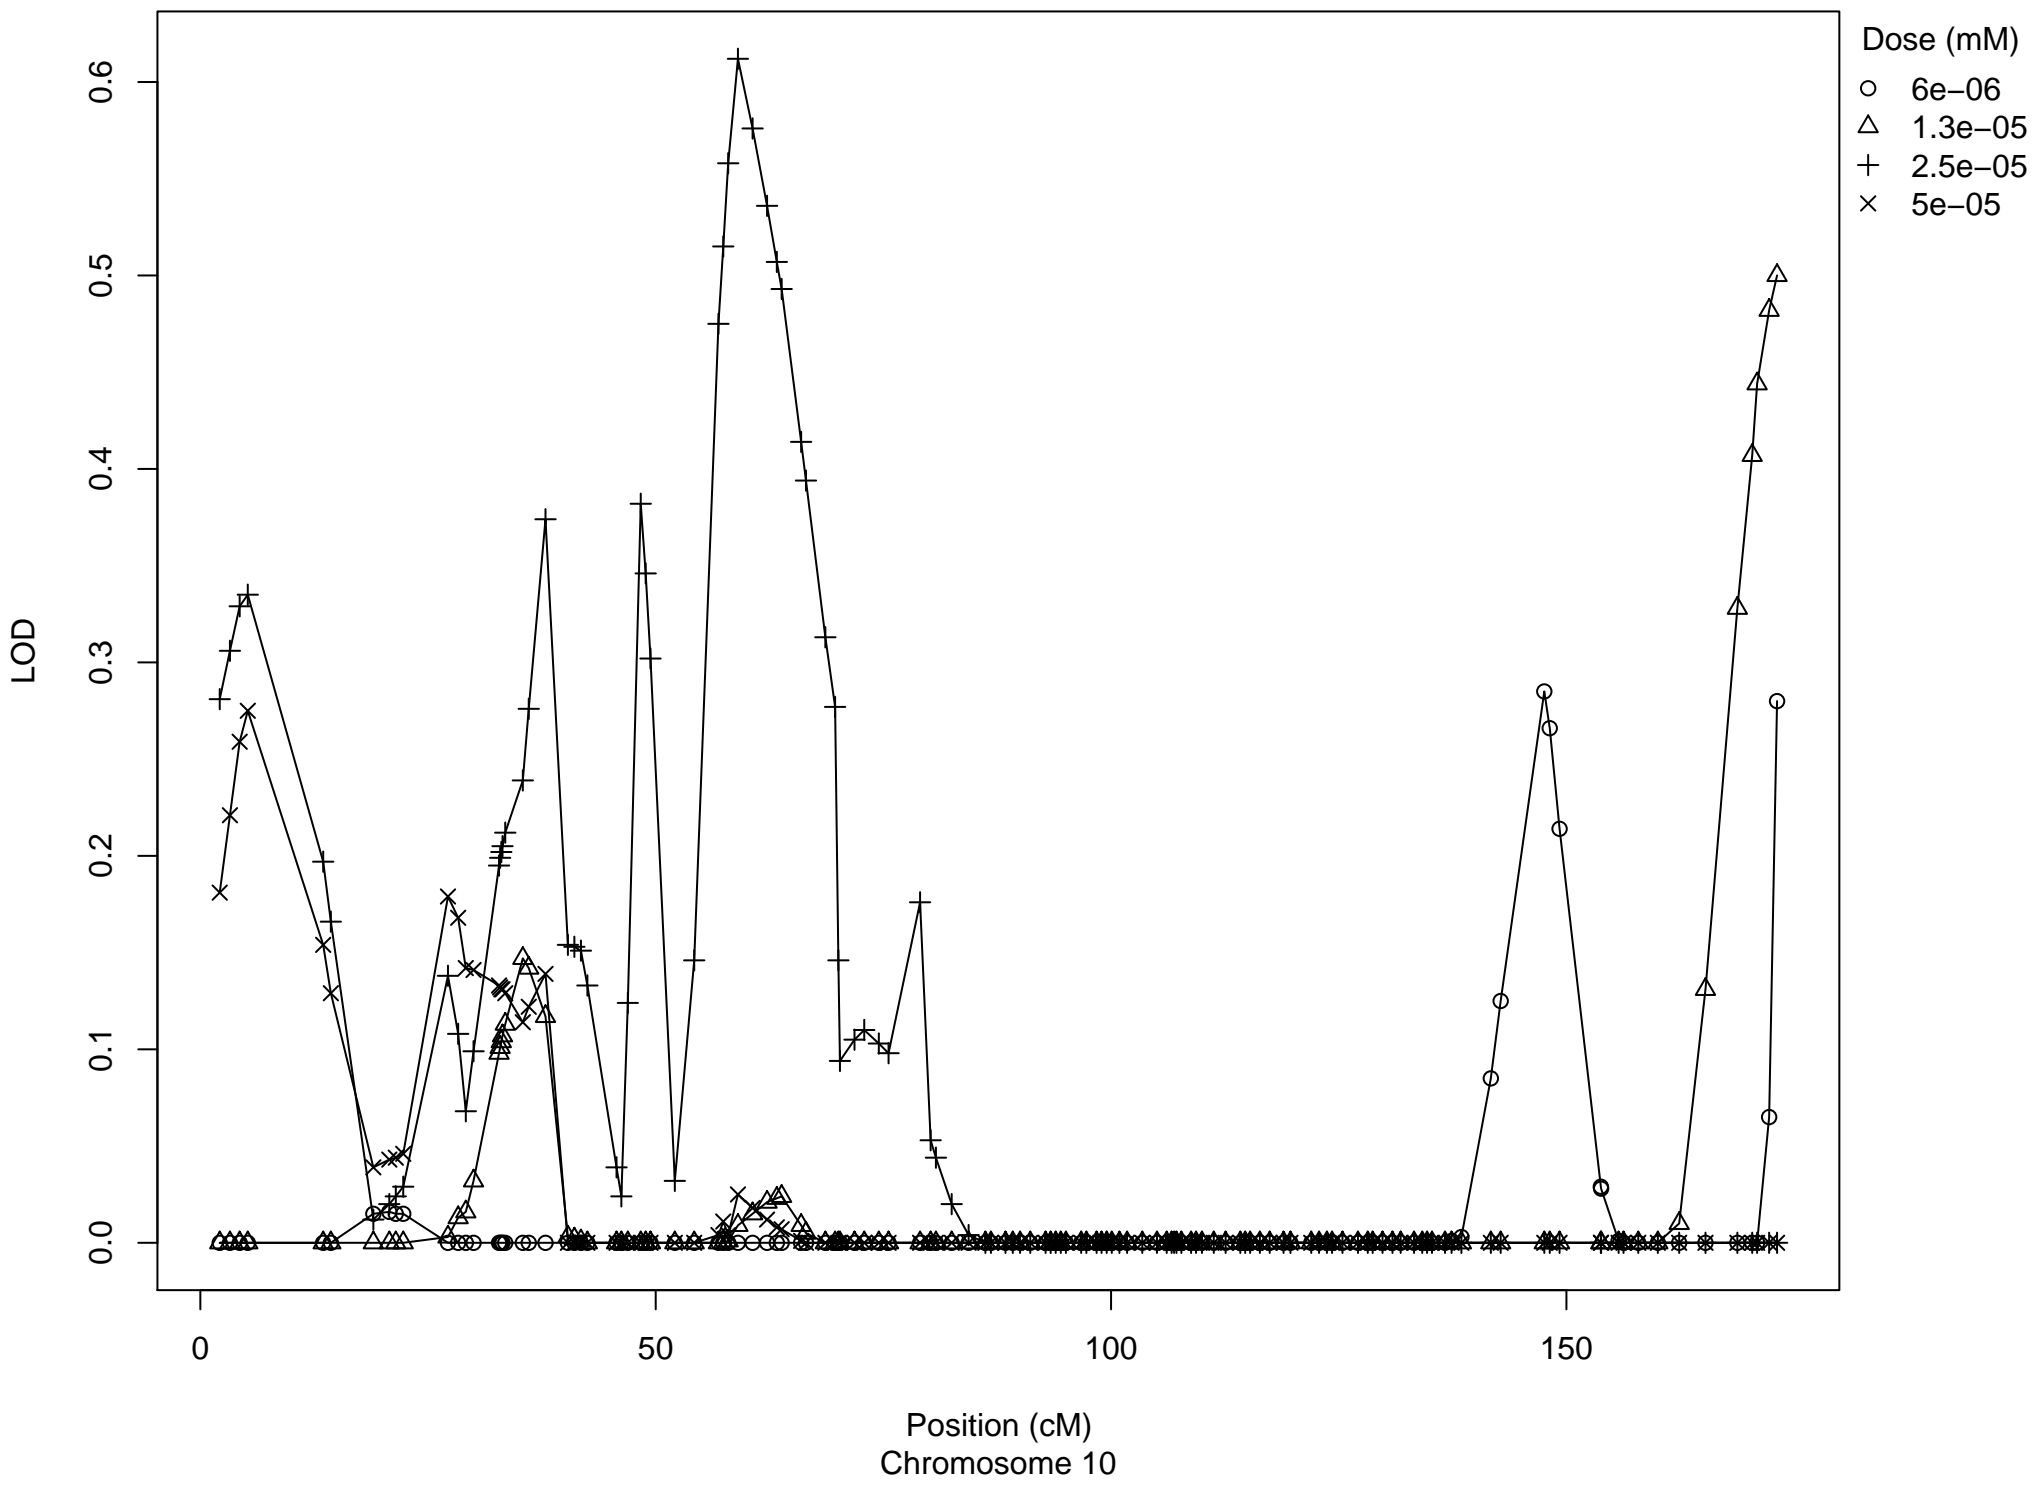

# doxorubicin hydrochloride (Dox)

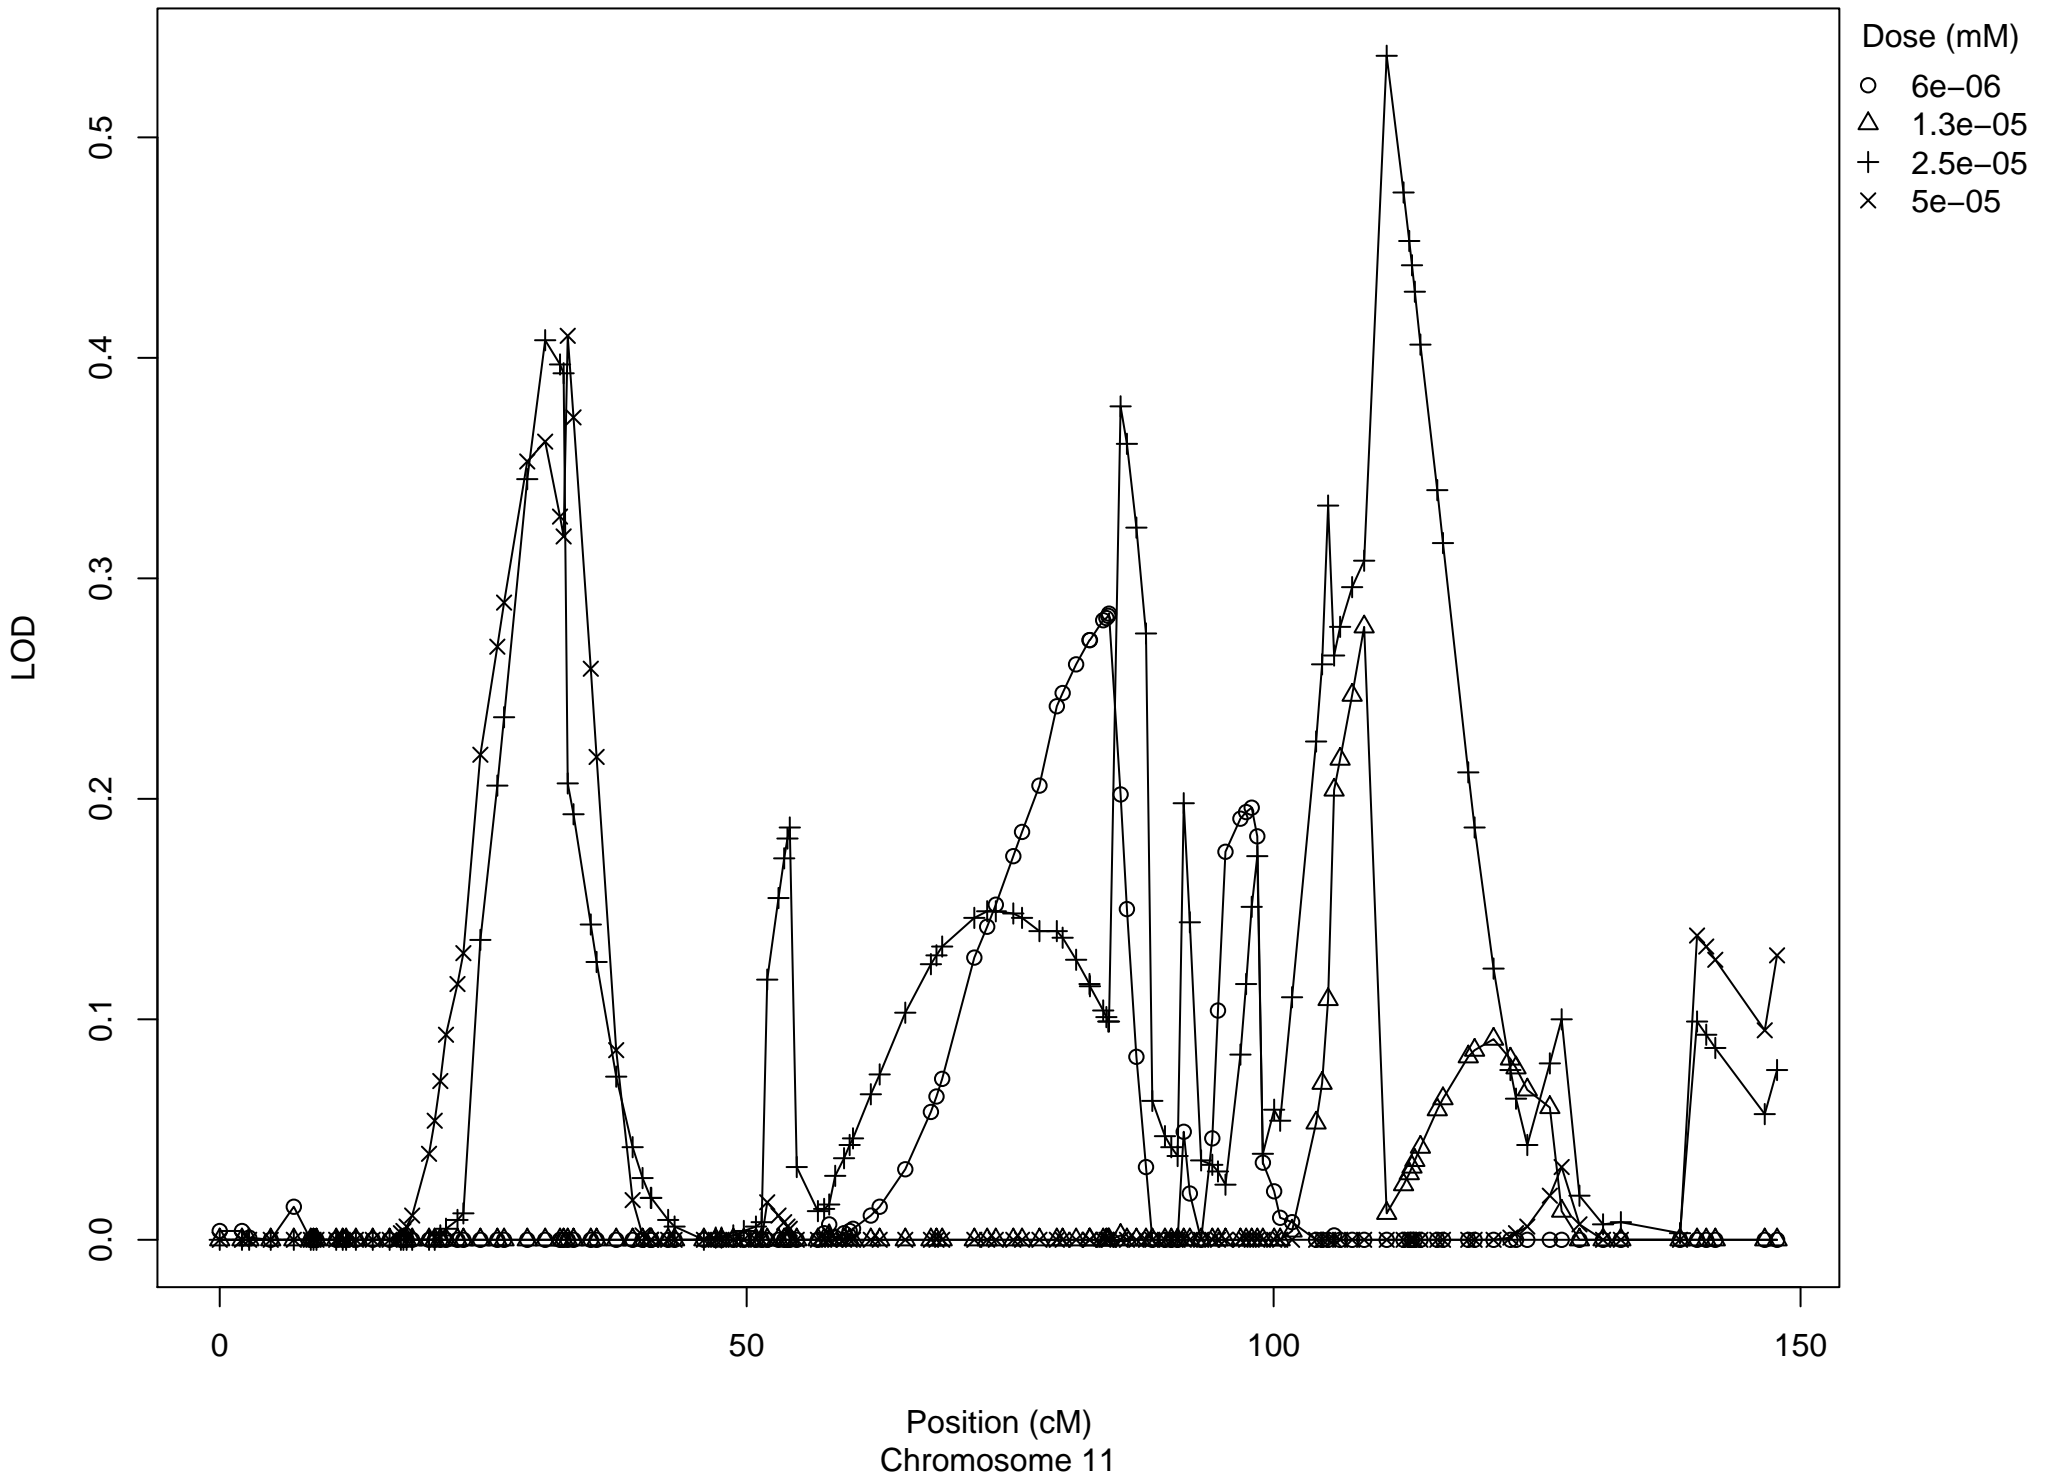

# doxorubicin hydrochloride (Dox)

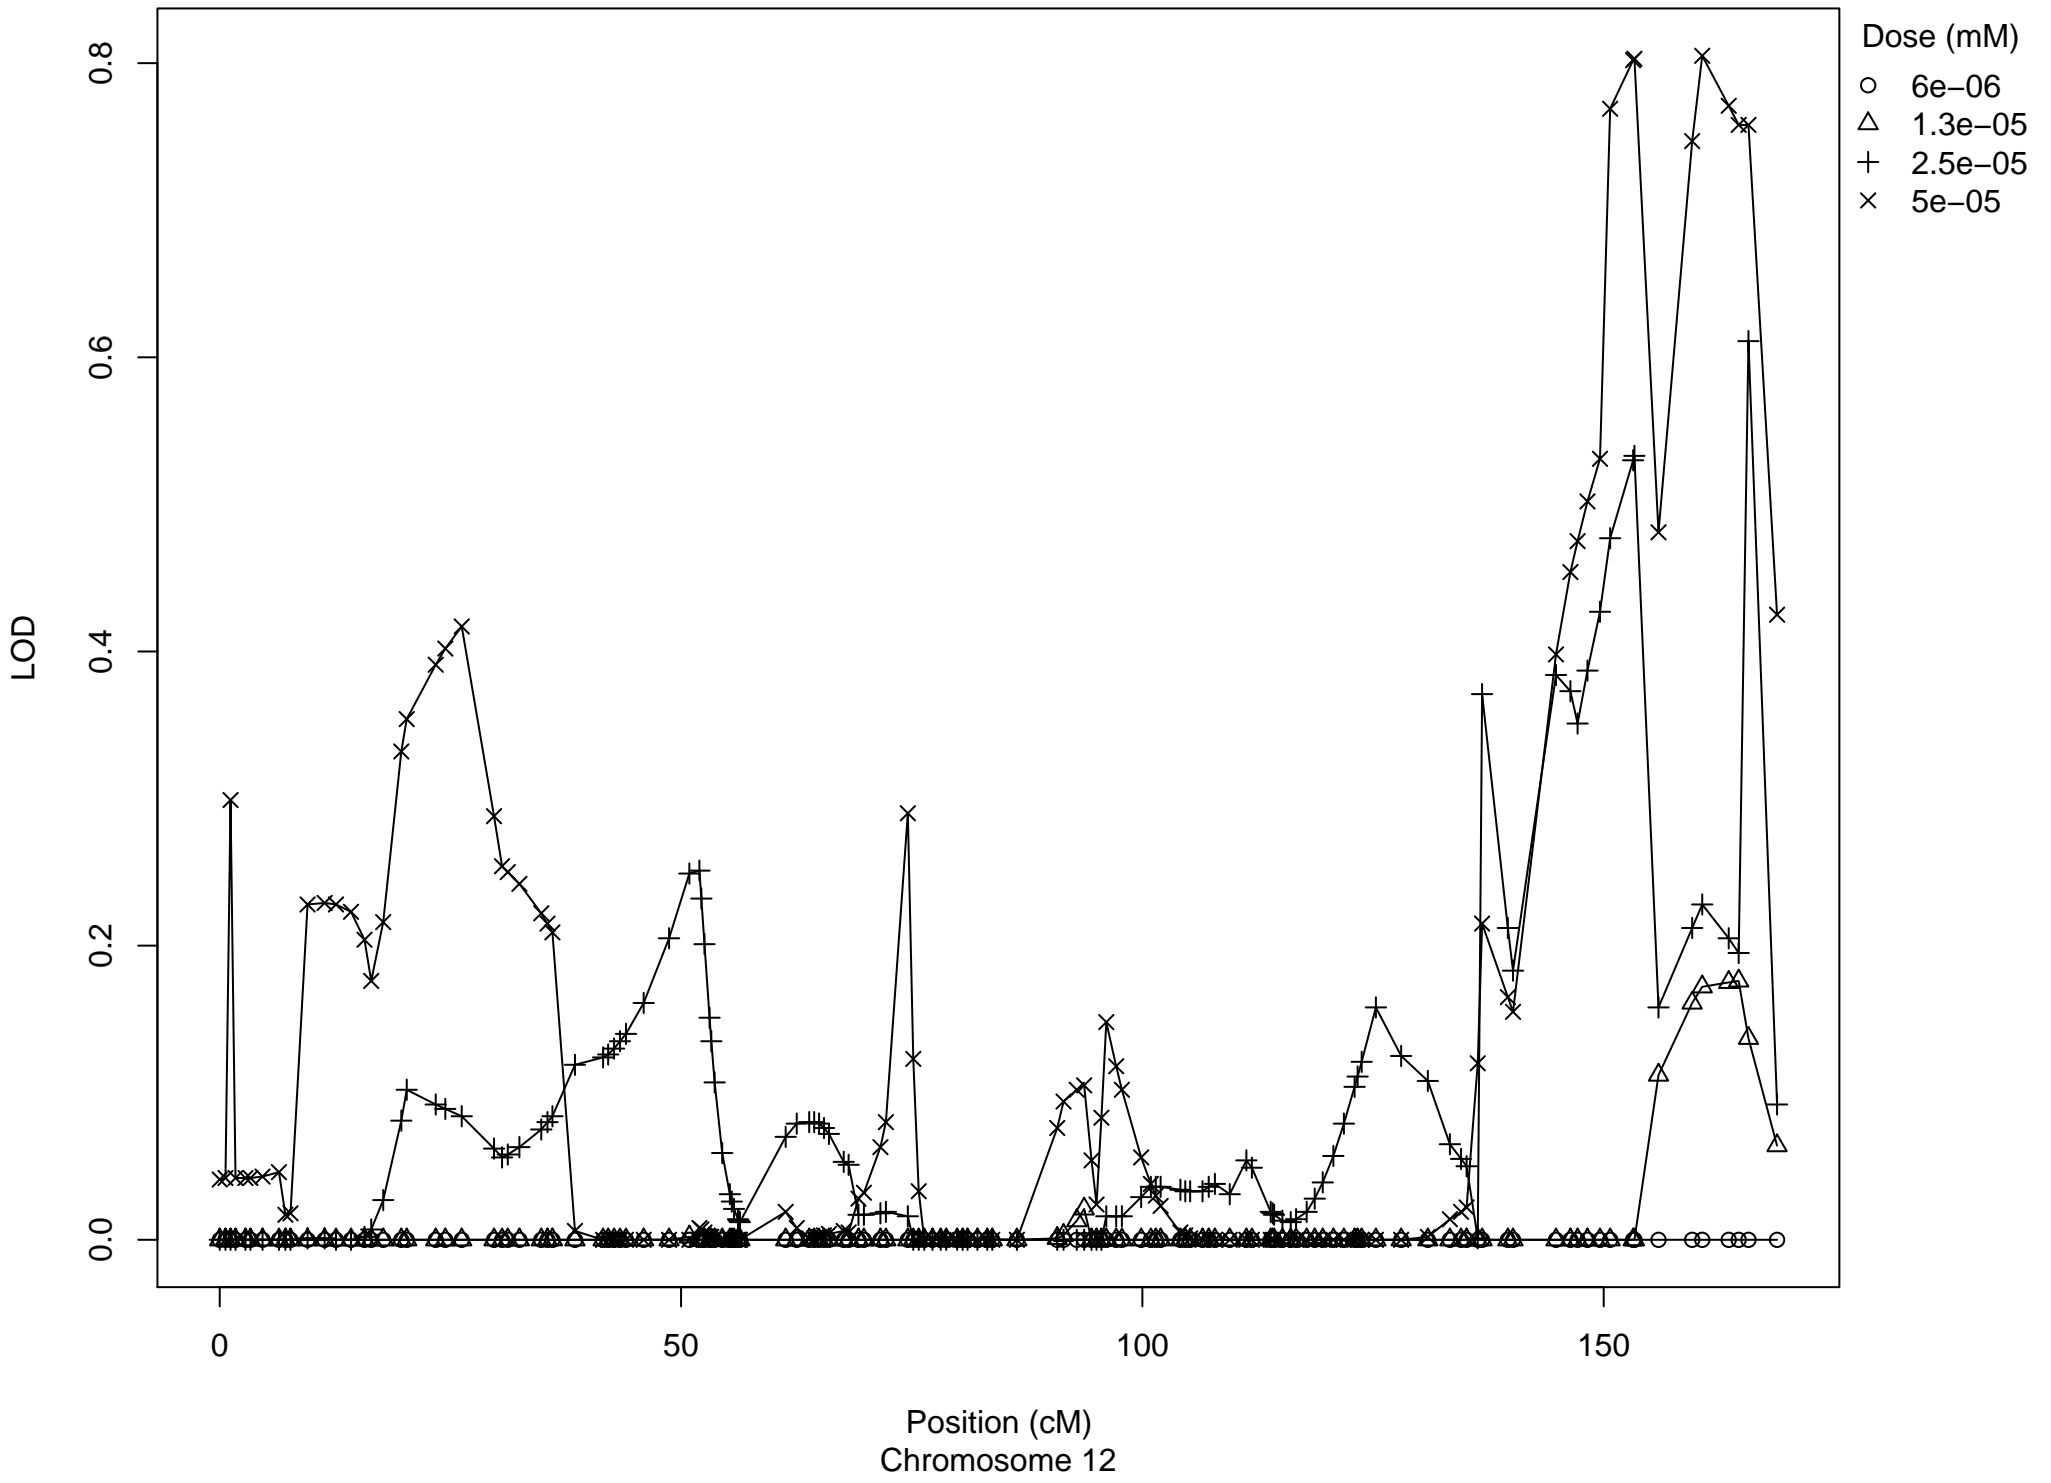

# doxorubicin hydrochloride (Dox)

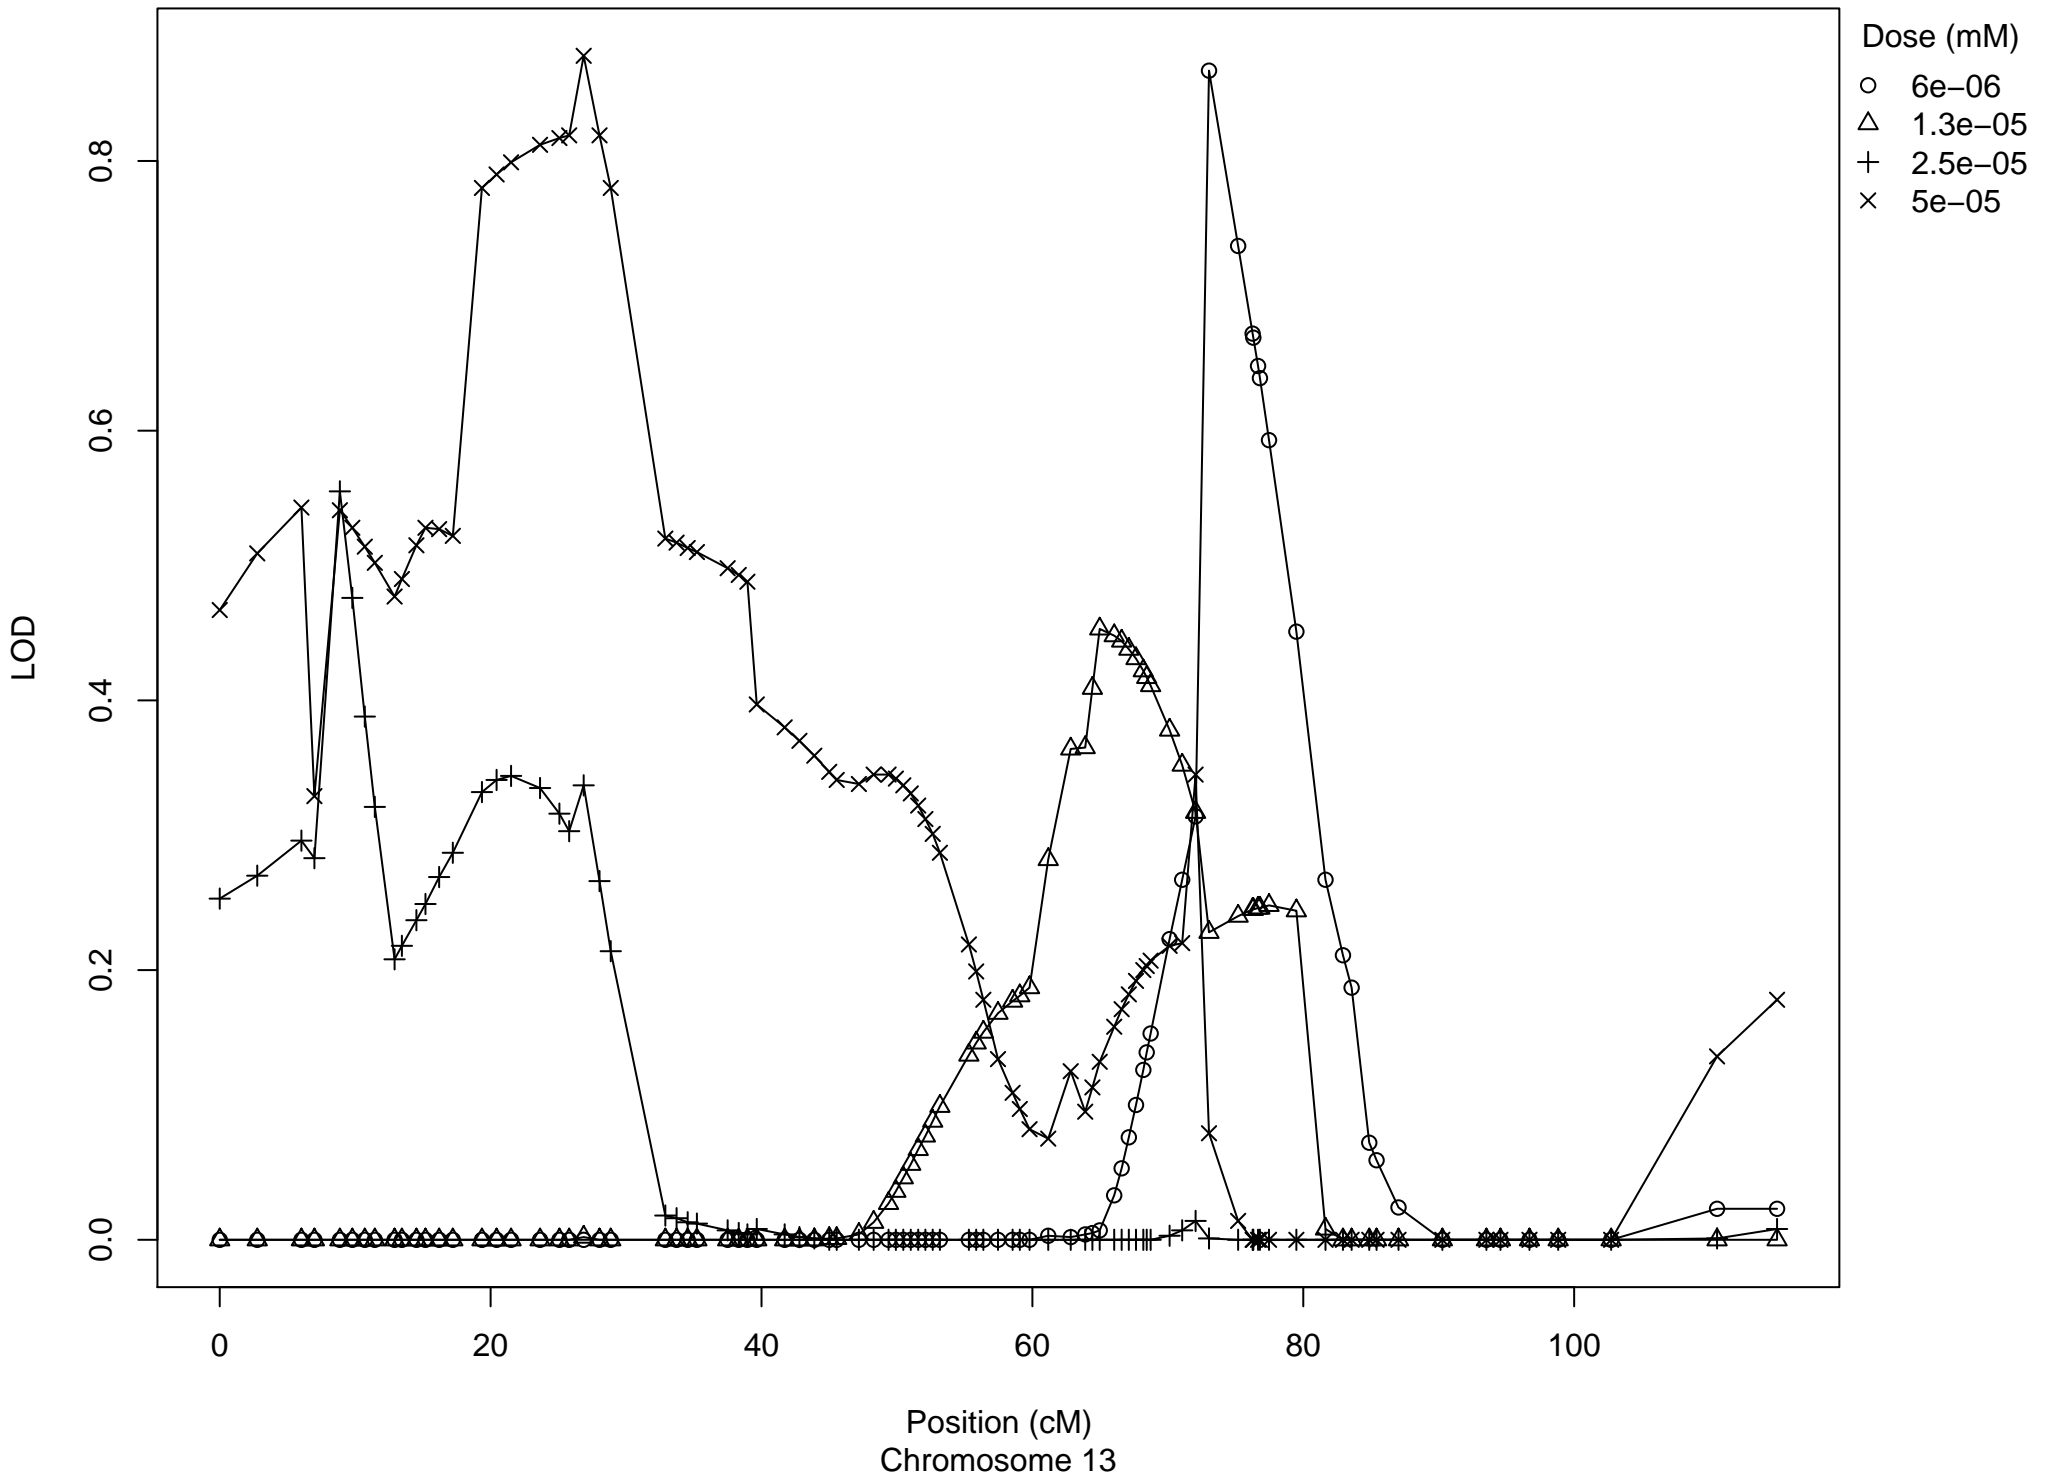

# doxorubicin hydrochloride (Dox)

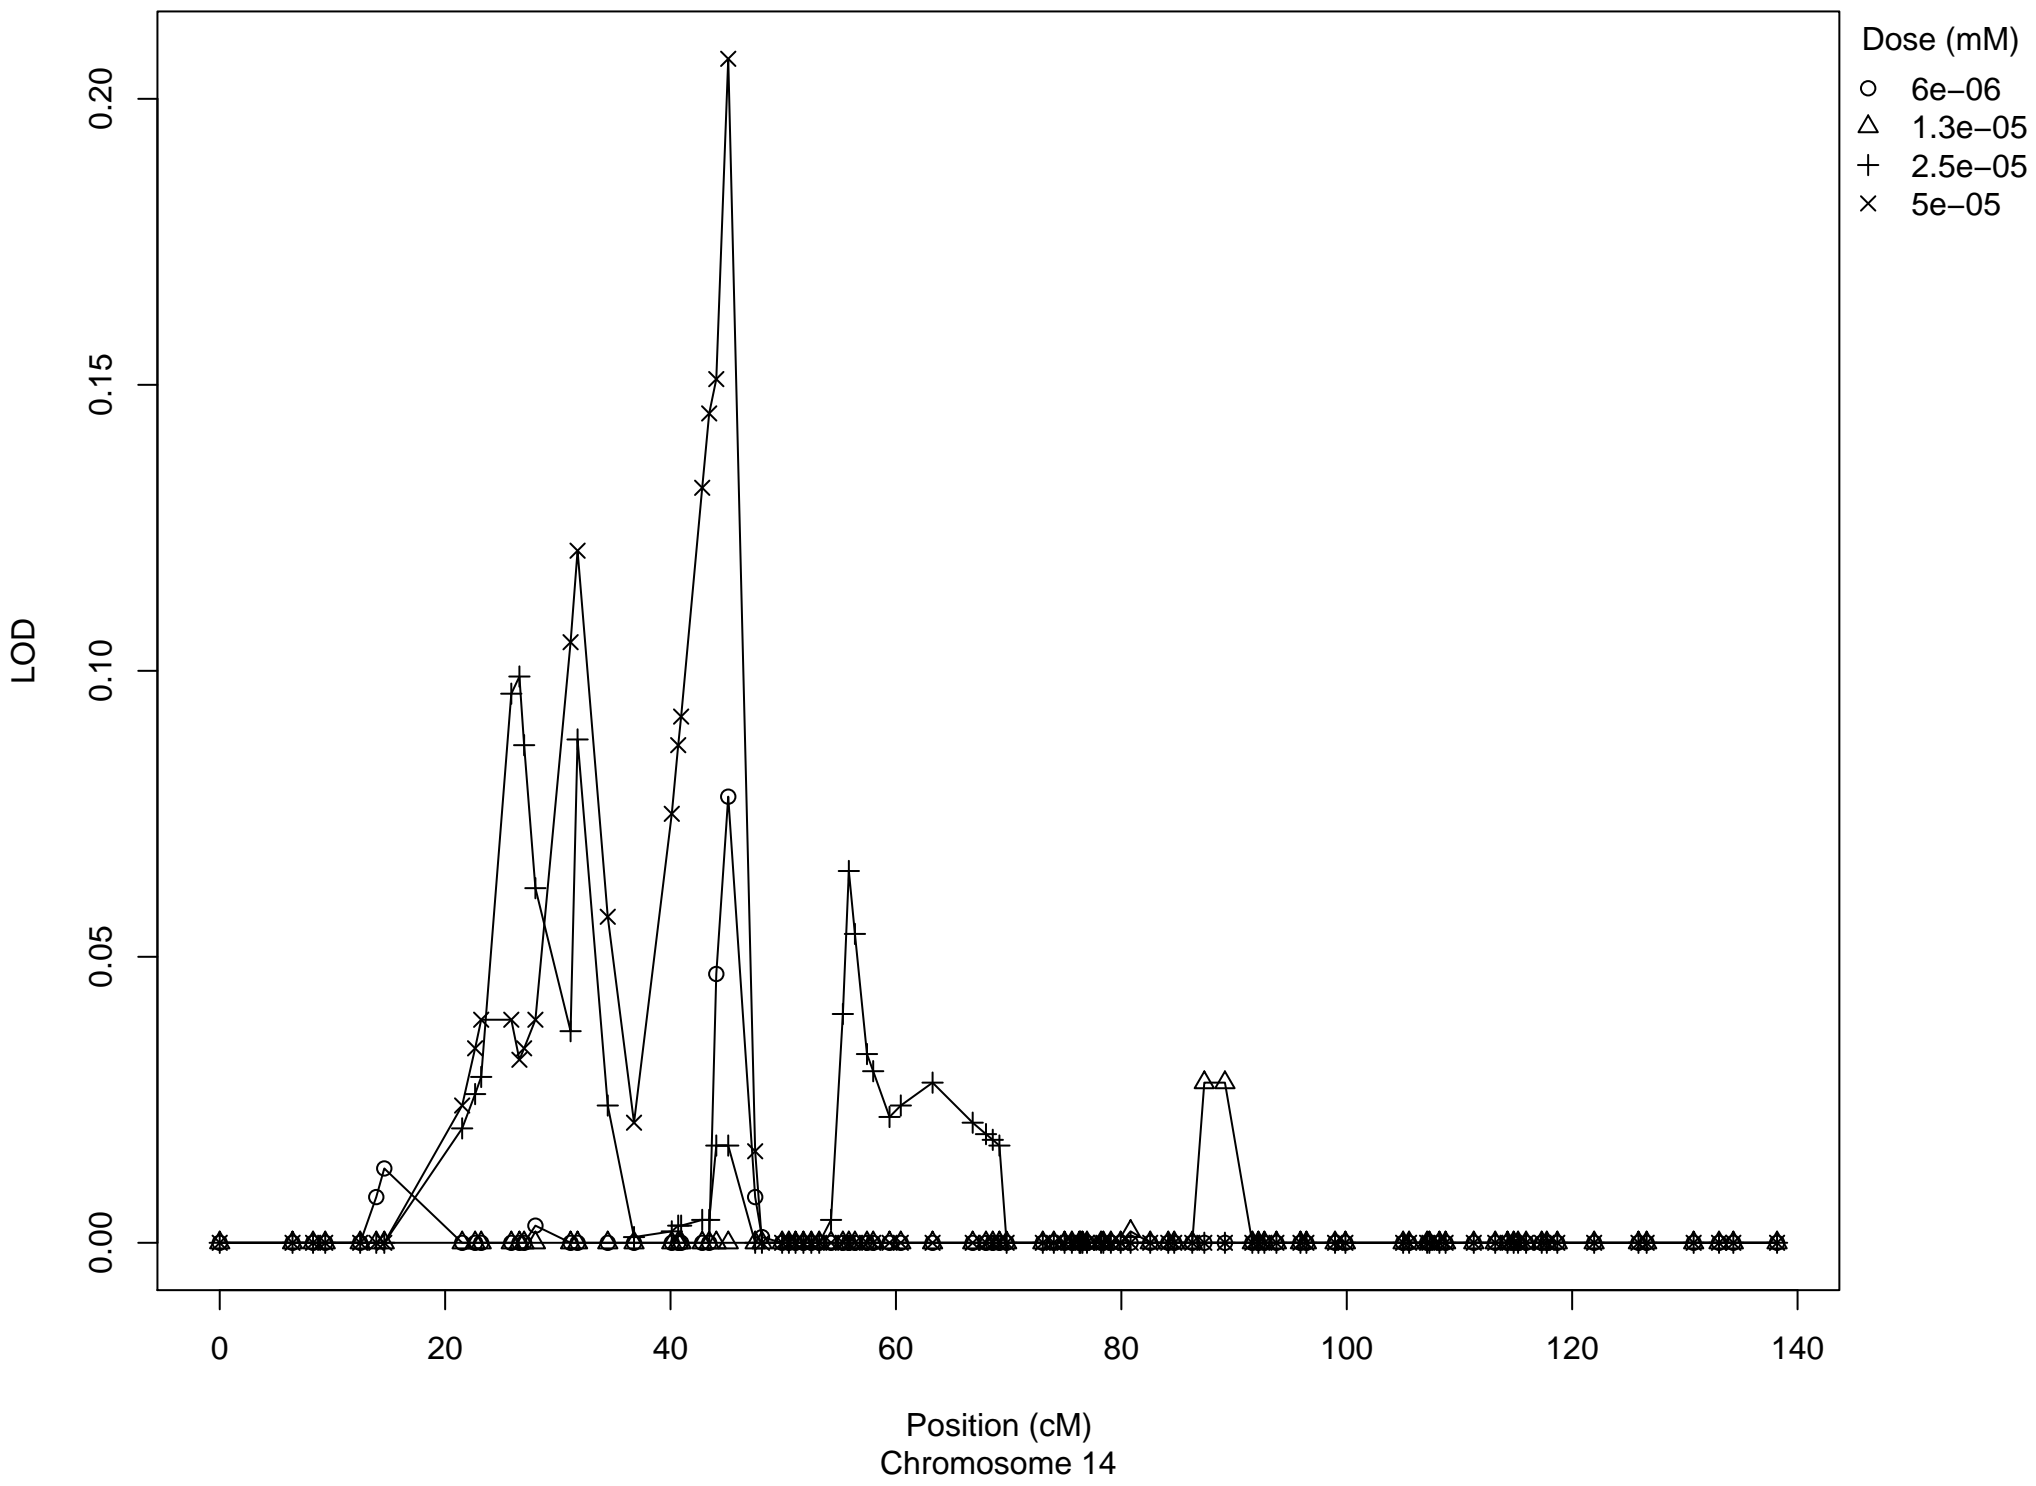

# doxorubicin hydrochloride (Dox)

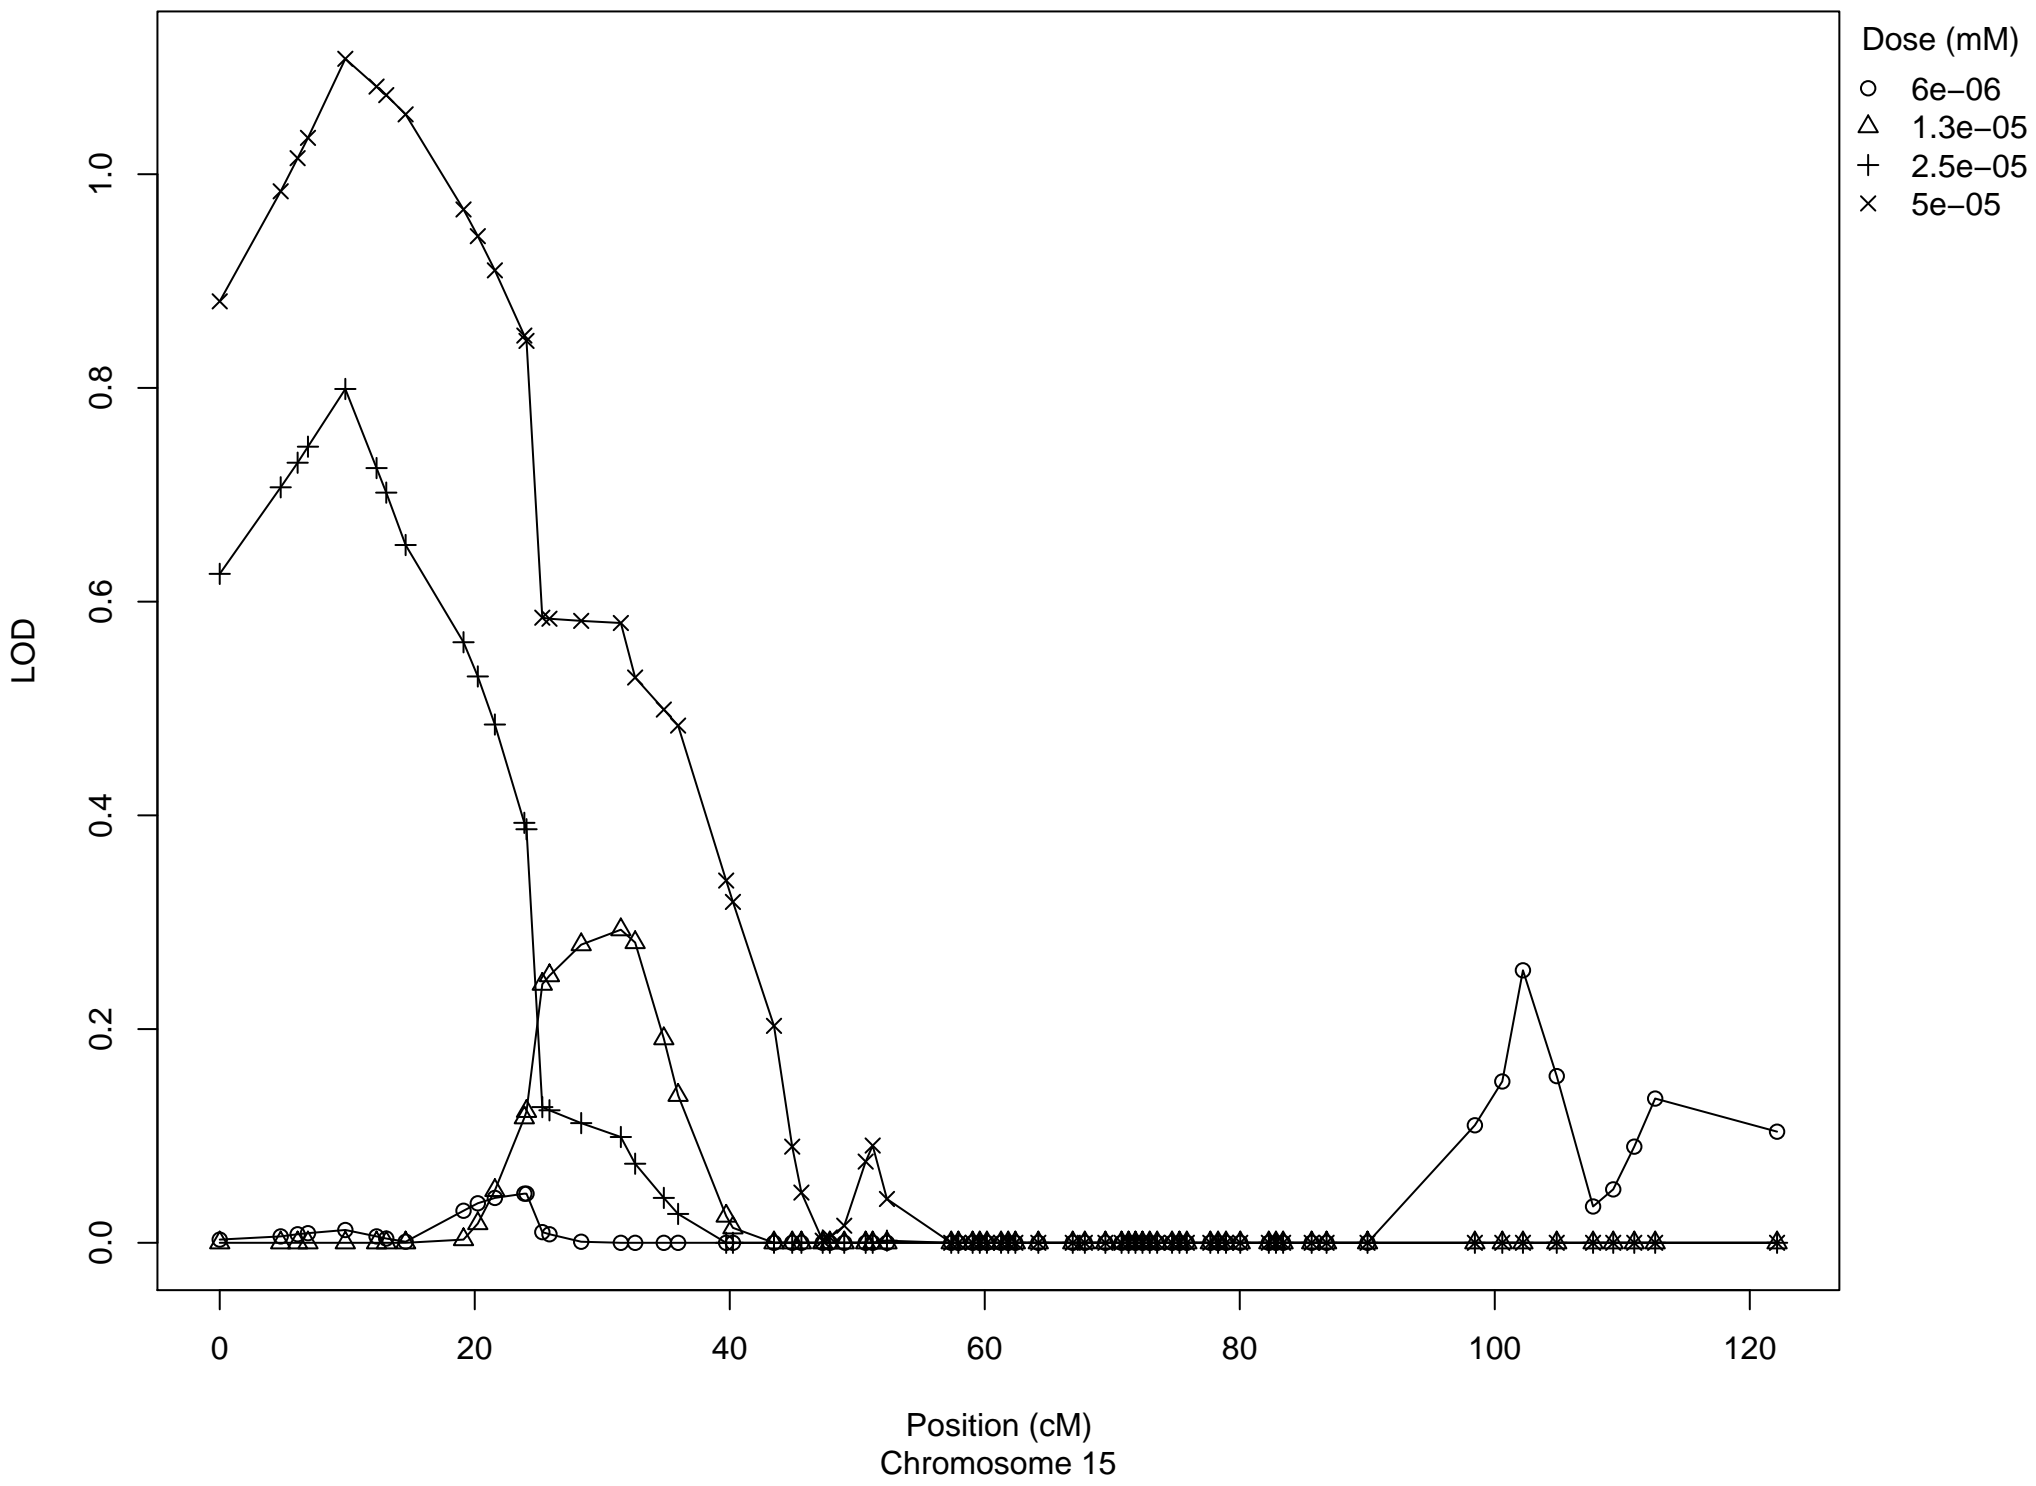

# doxorubicin hydrochloride (Dox)

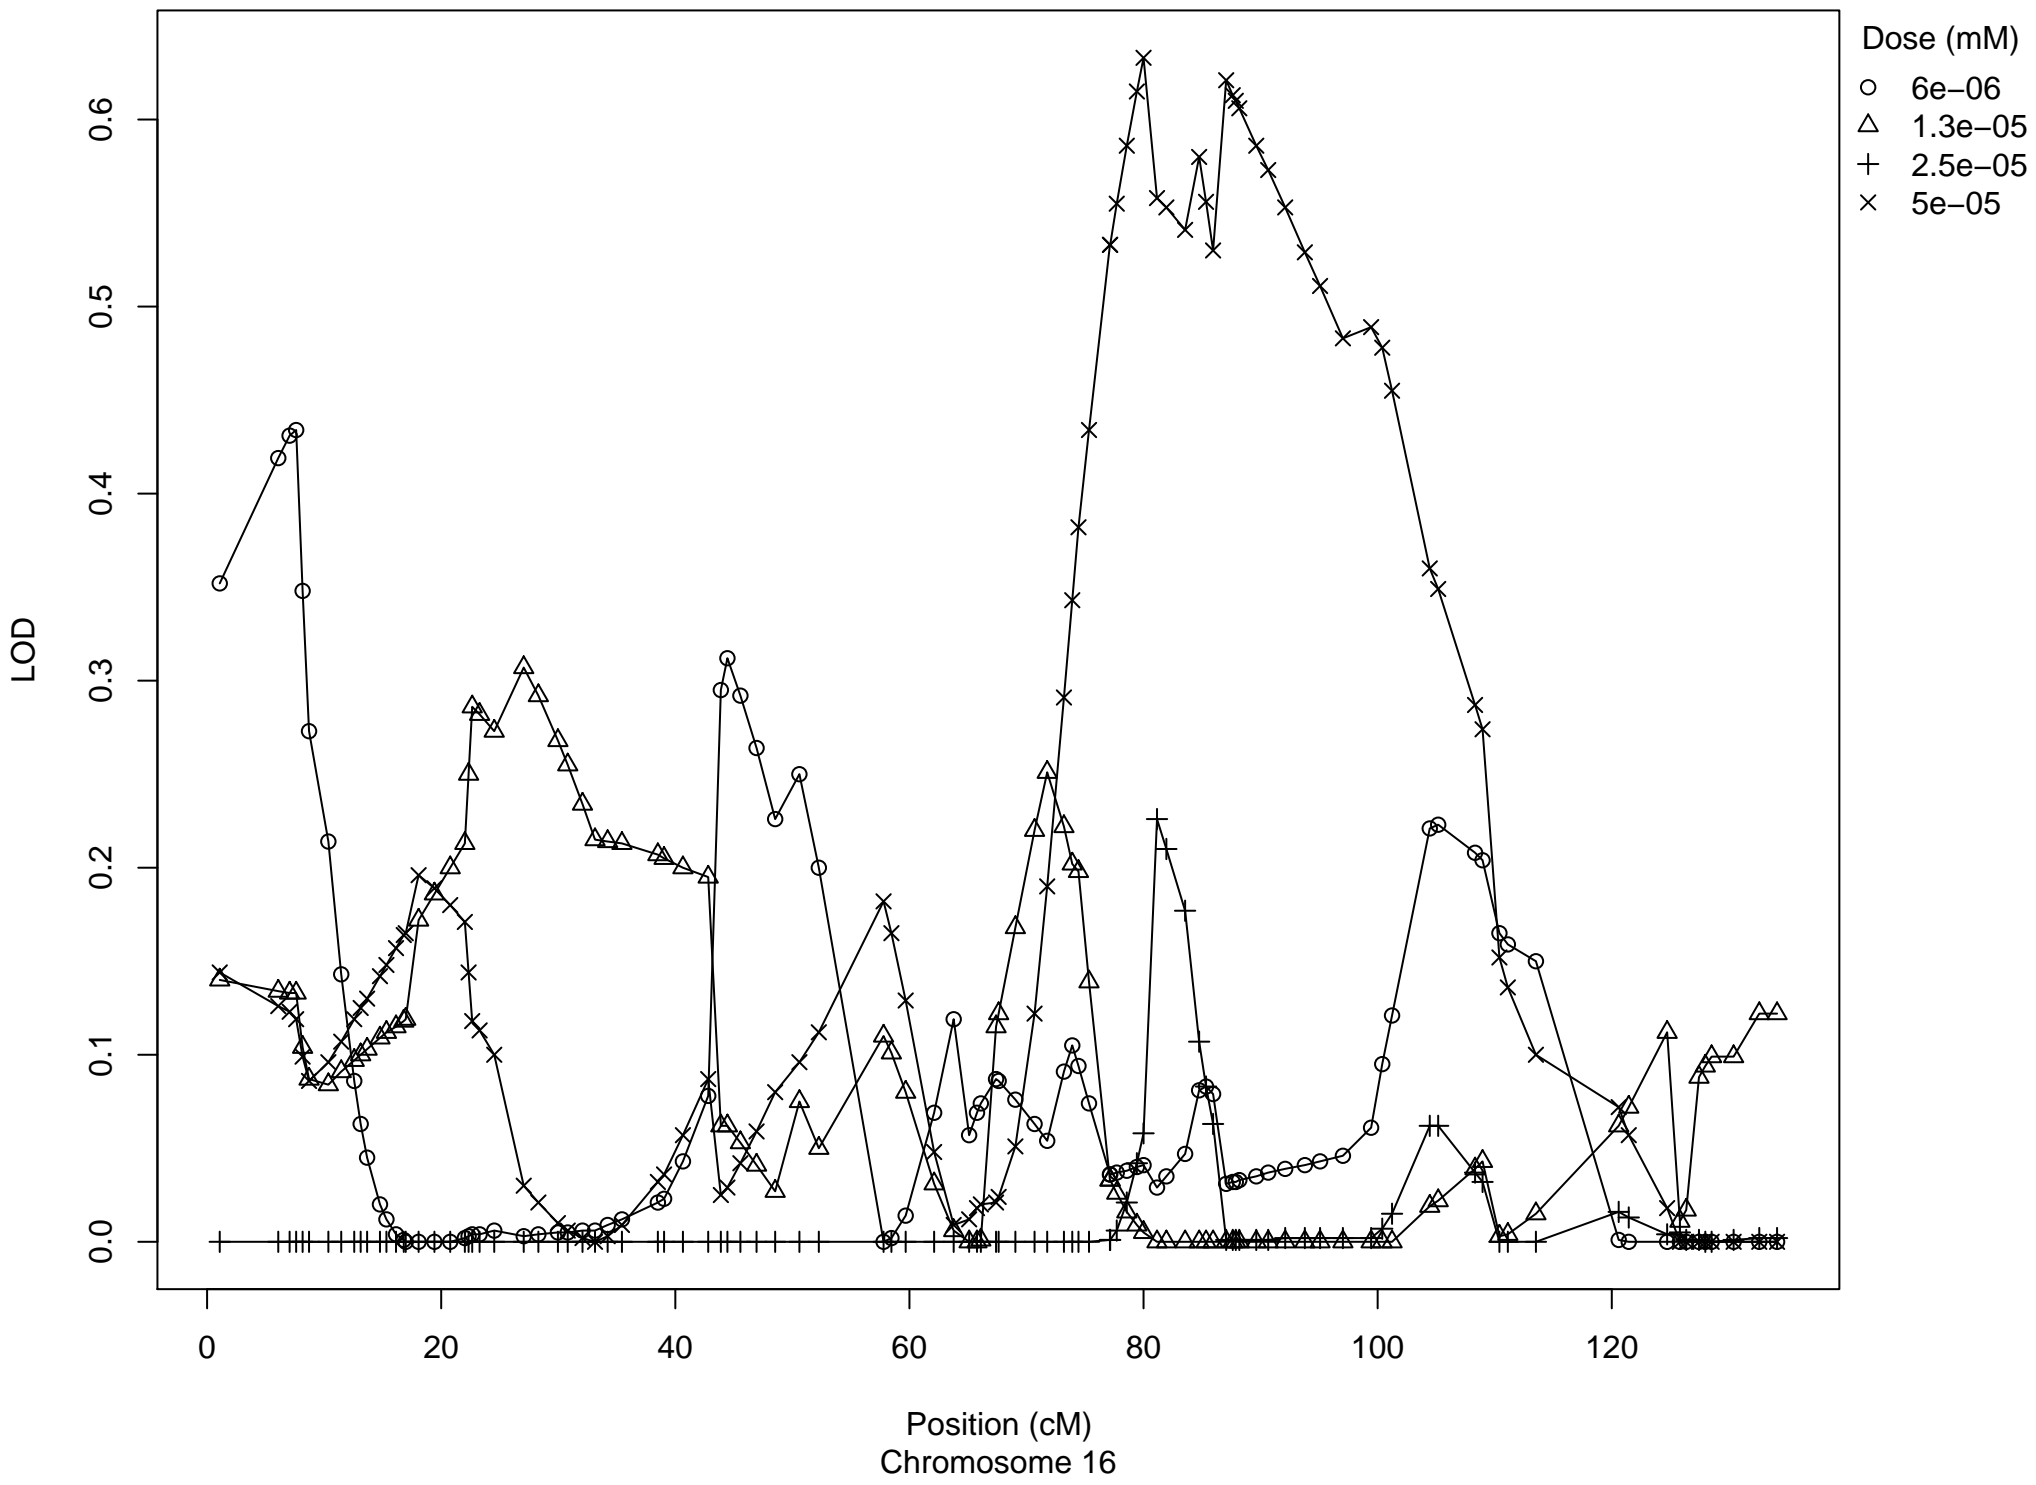



# doxorubicin hydrochloride (Dox)

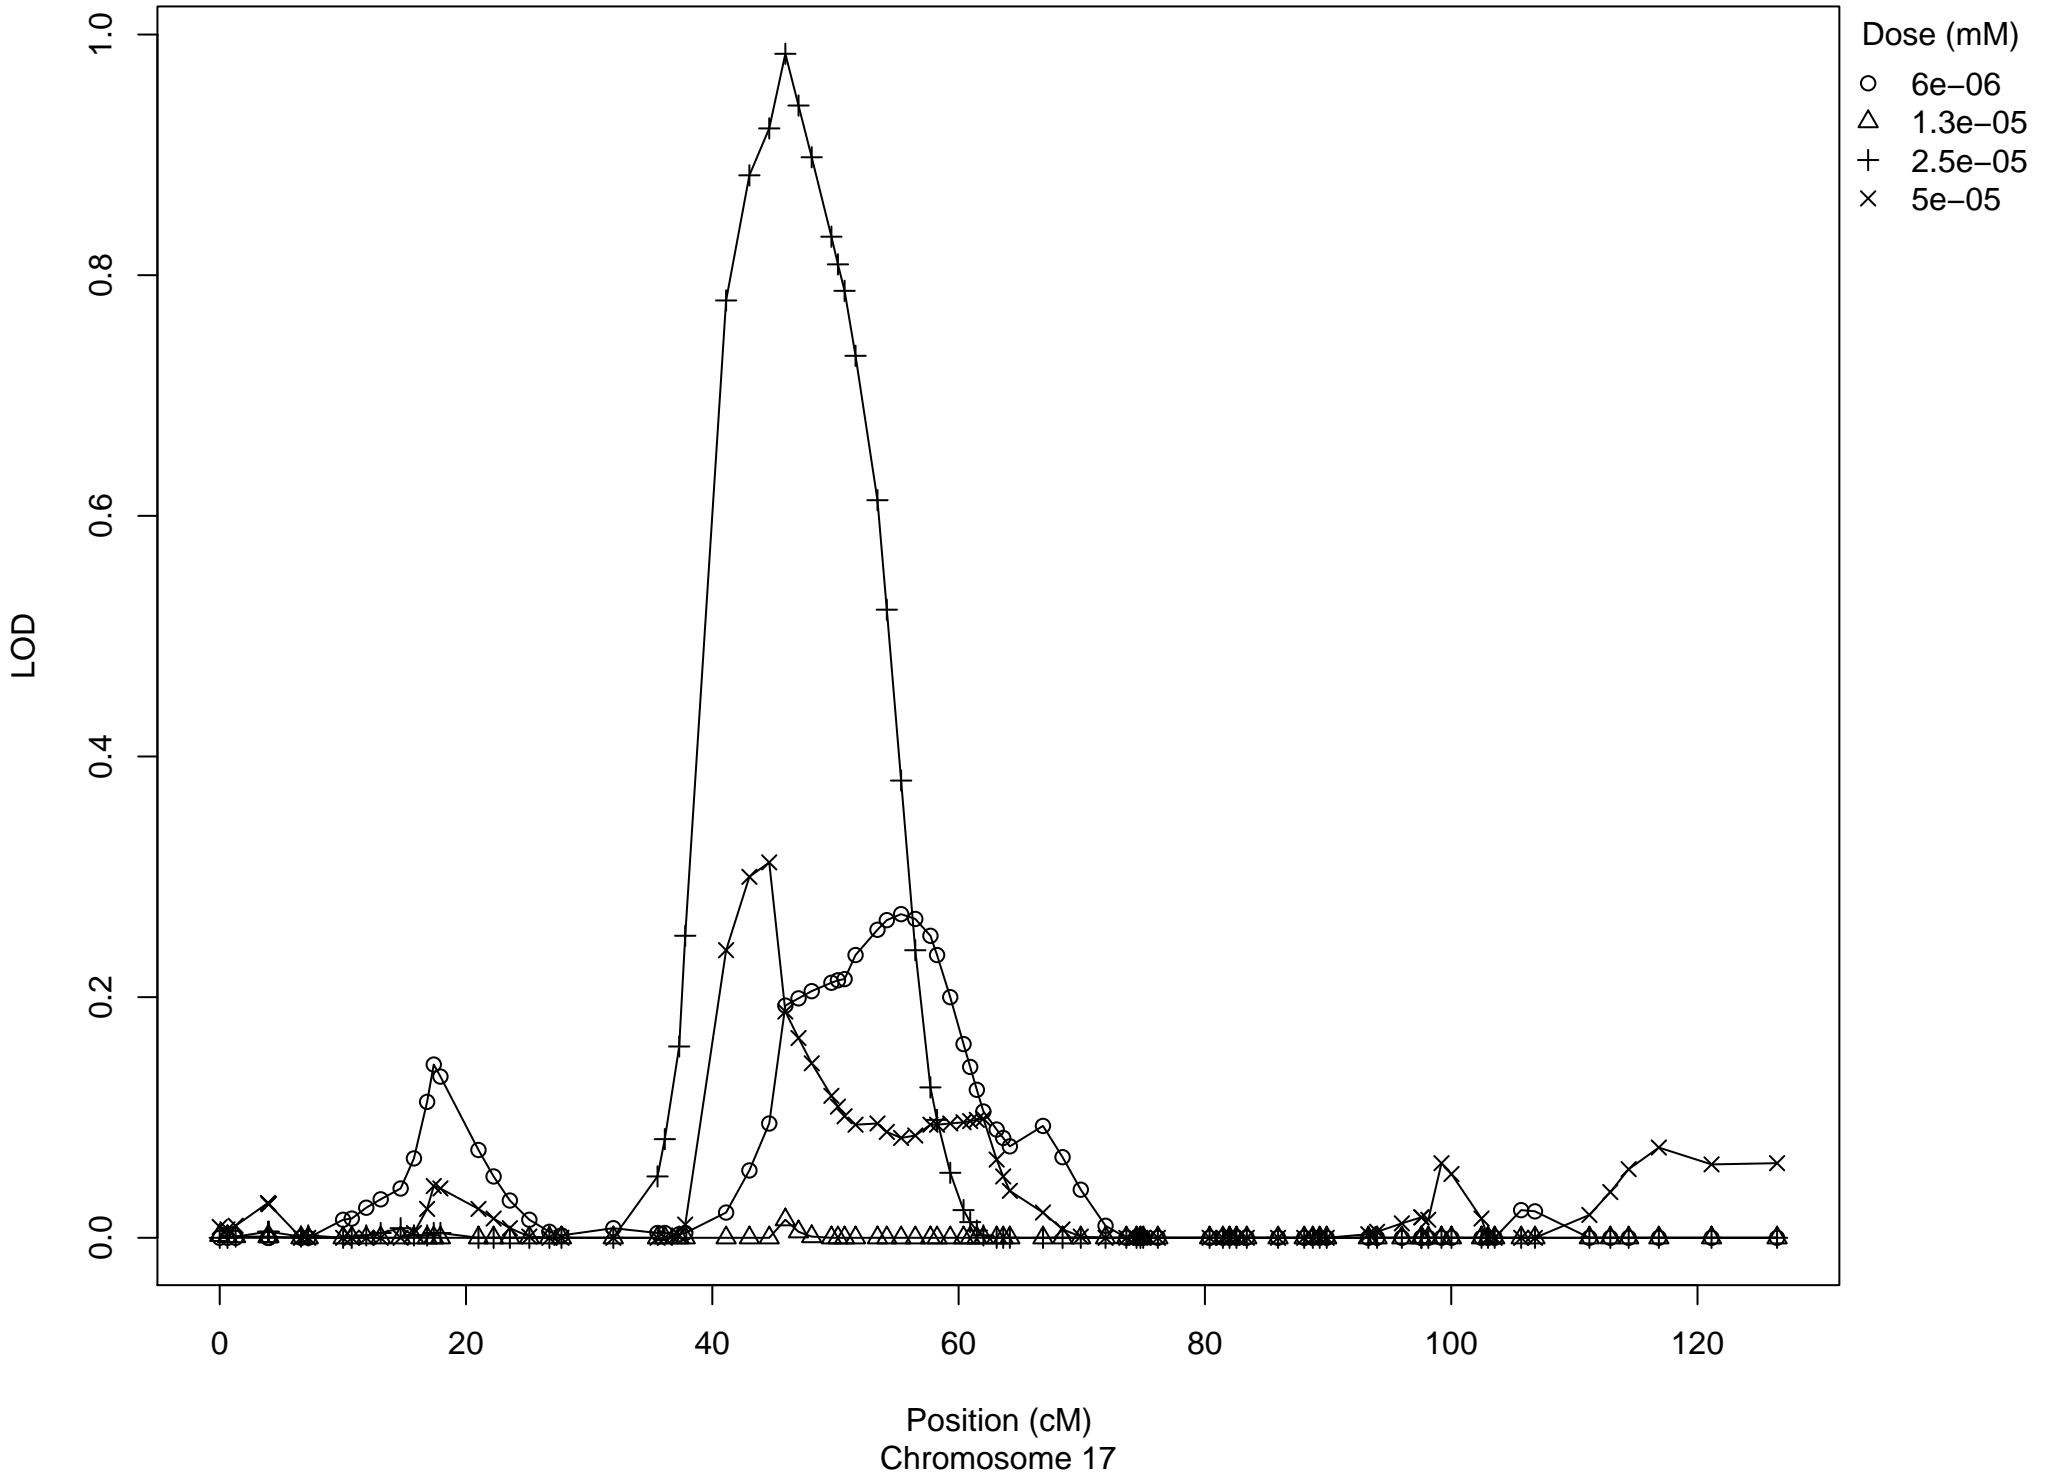

# doxorubicin hydrochloride (Dox)

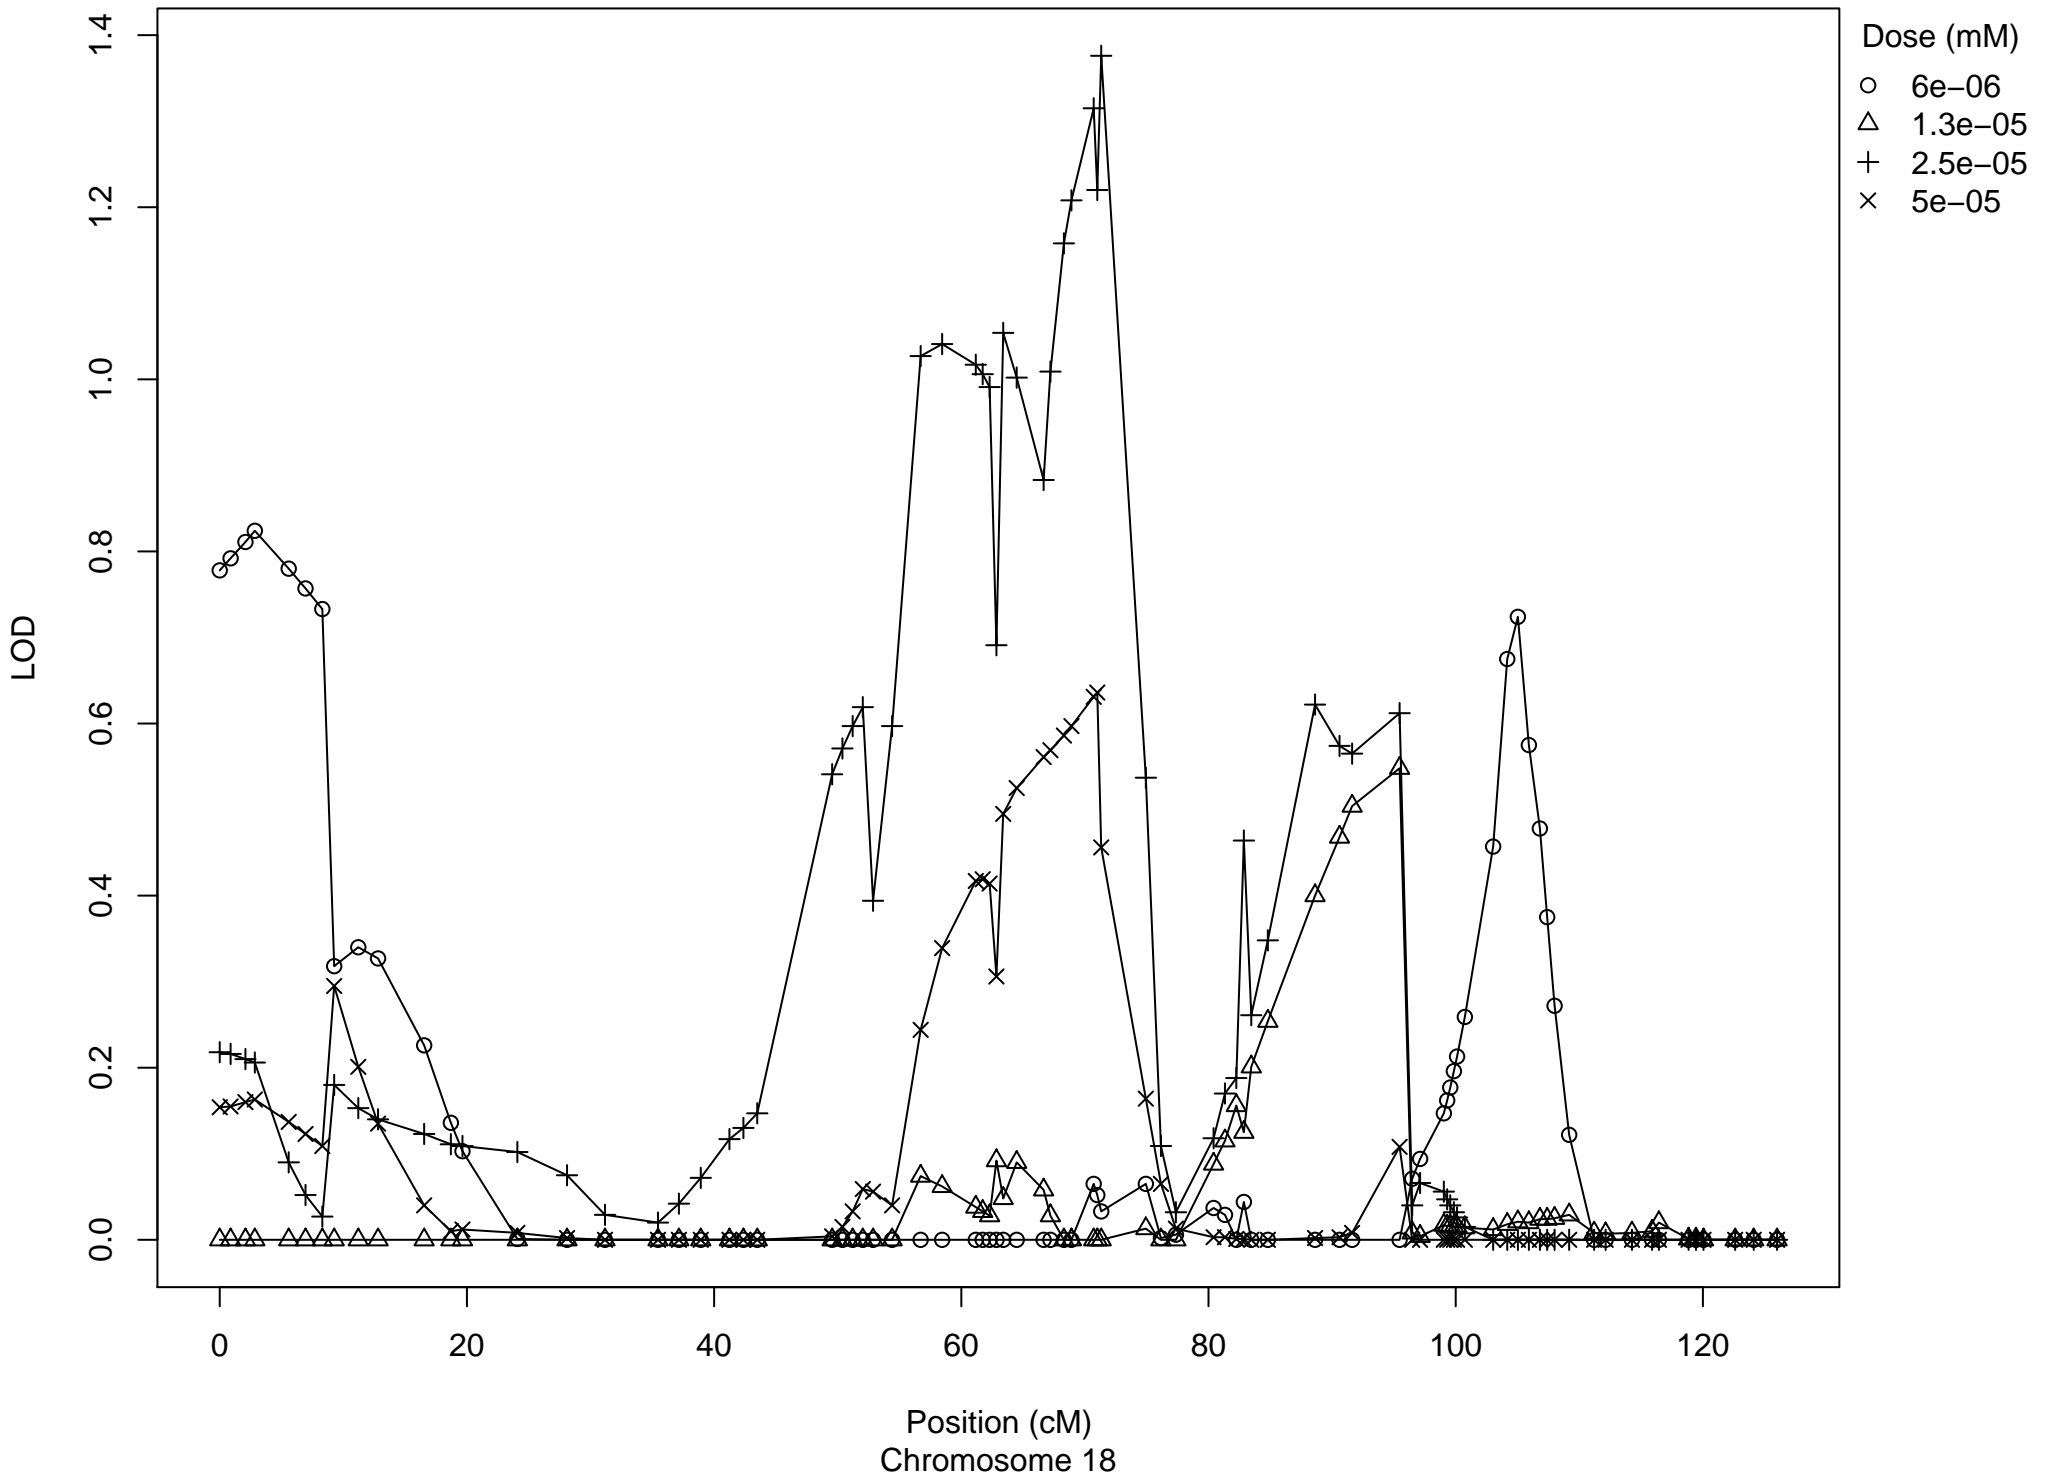

# doxorubicin hydrochloride (Dox)

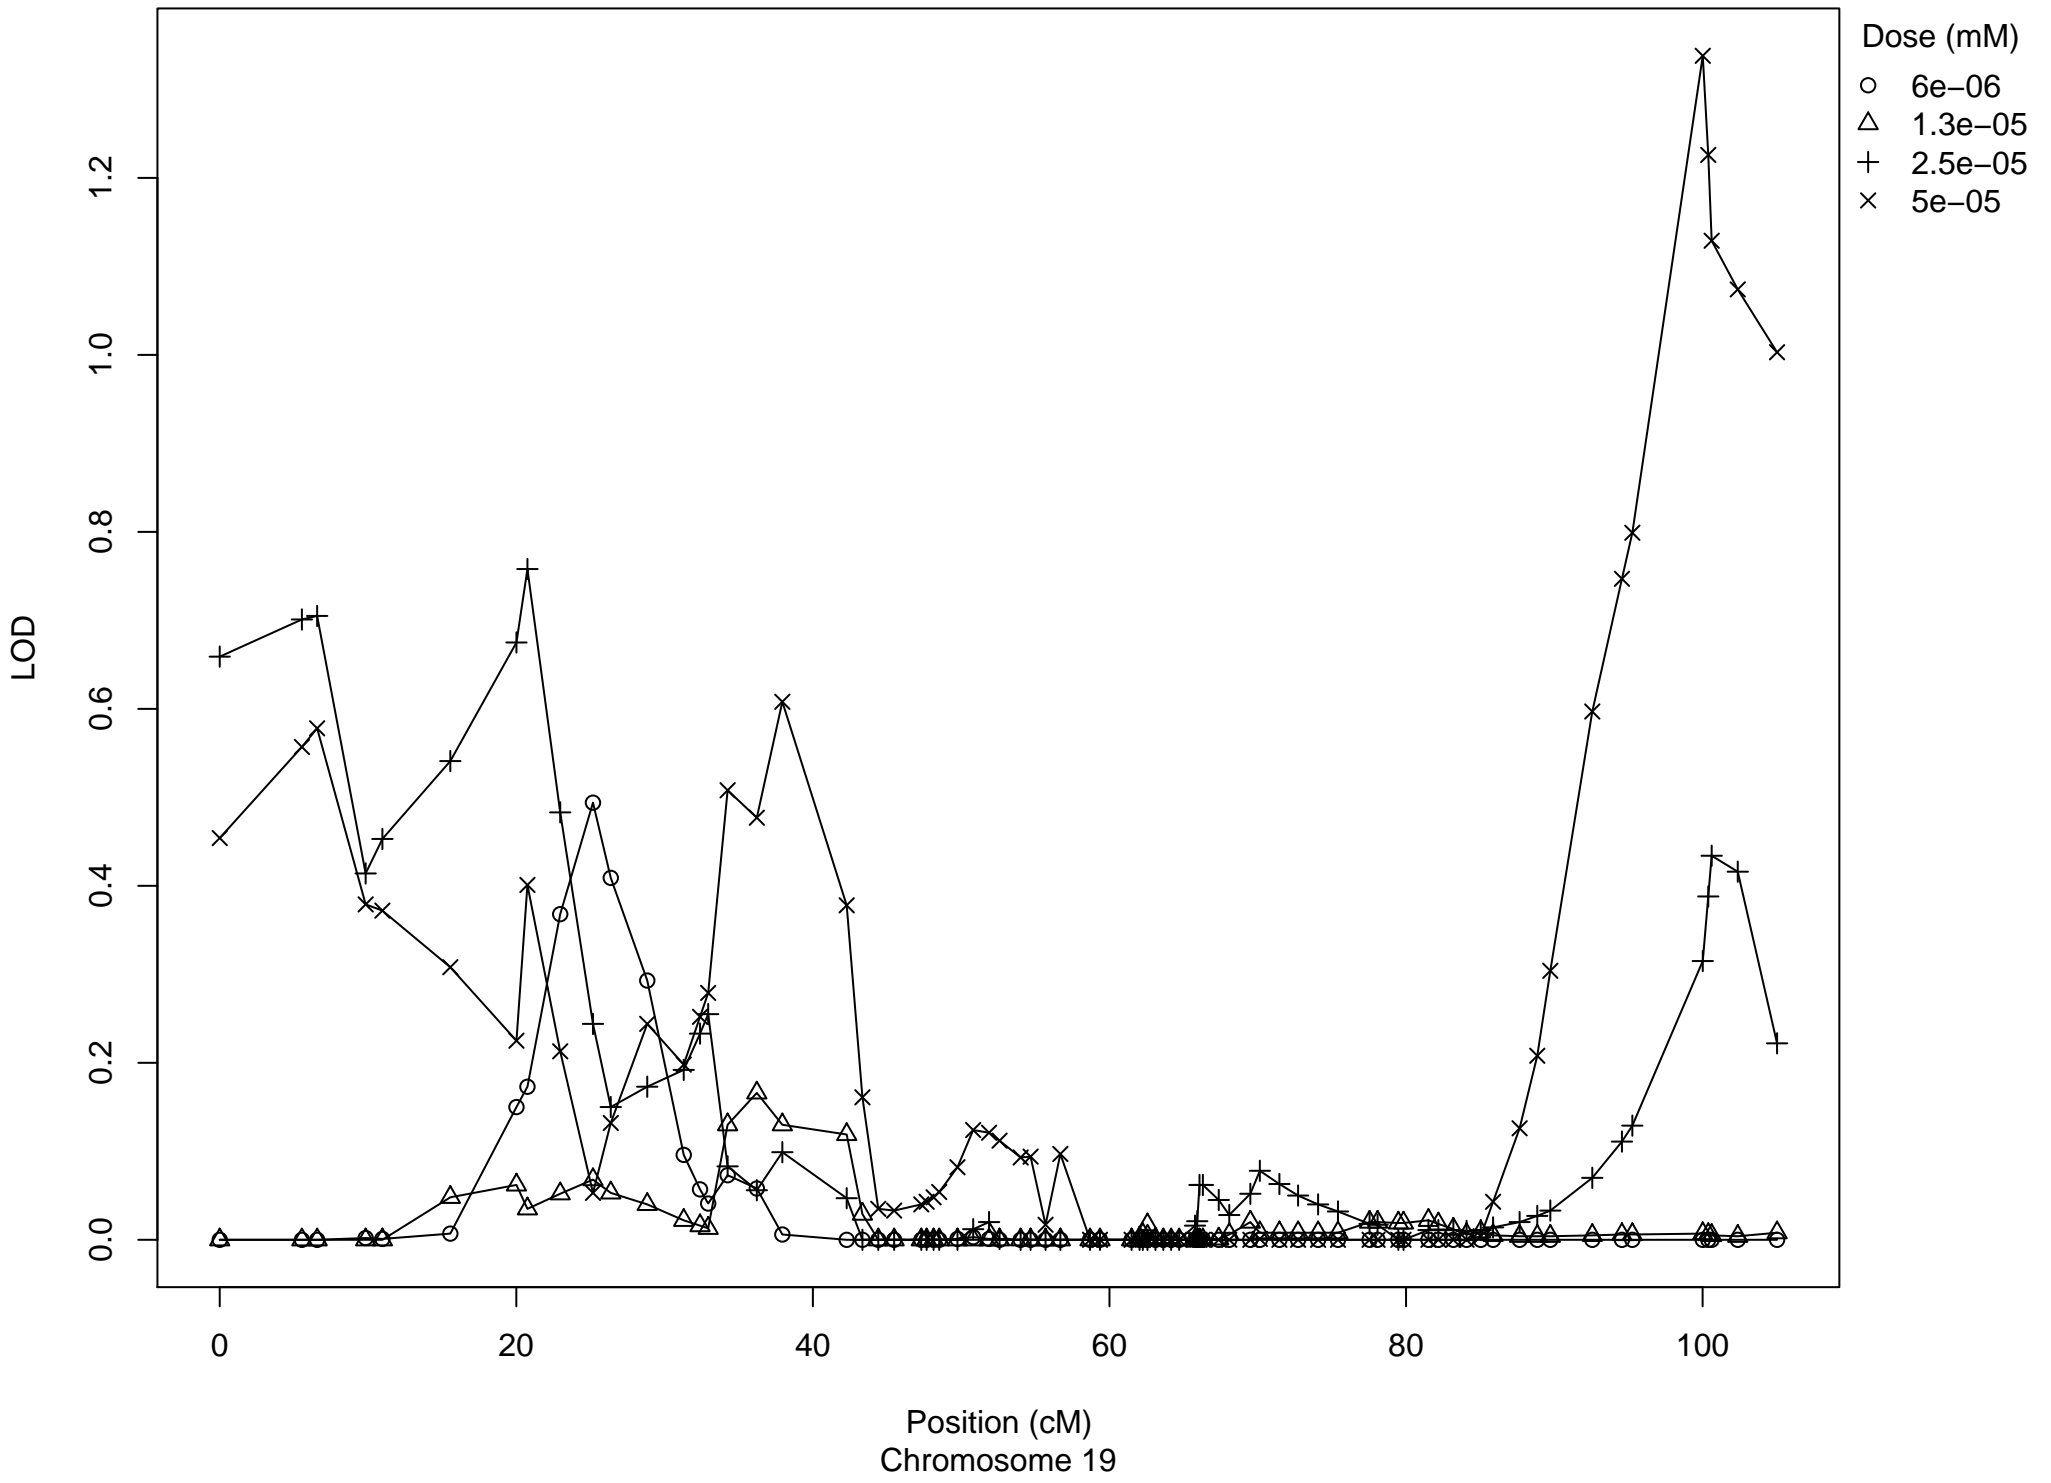

# doxorubicin hydrochloride (Dox)

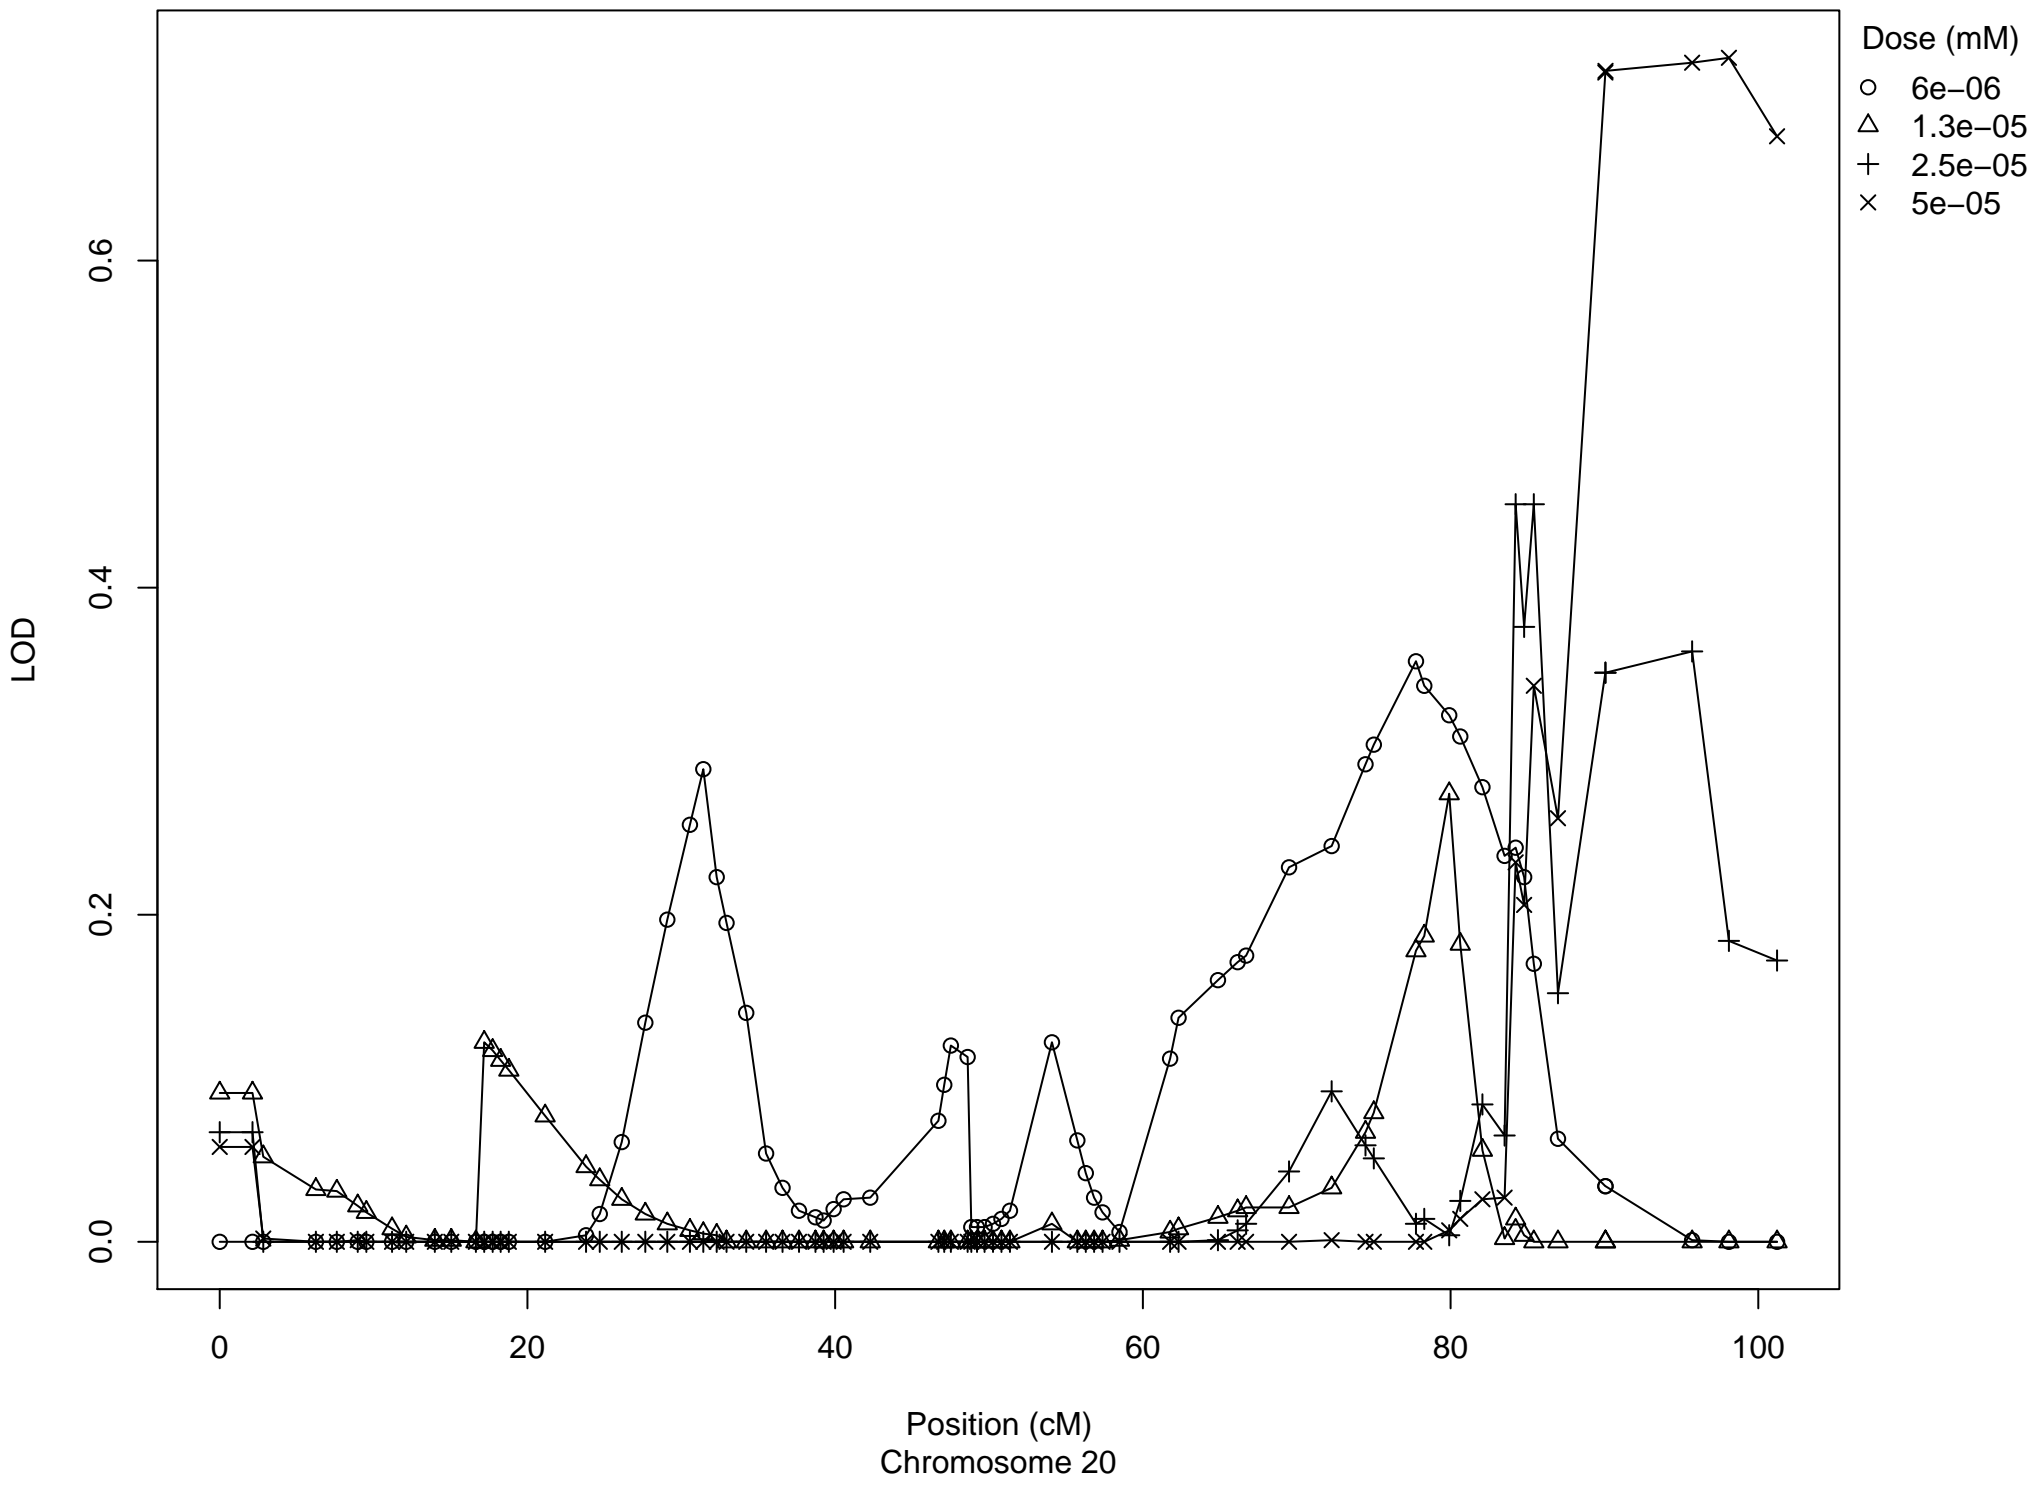

# doxorubicin hydrochloride (Dox)

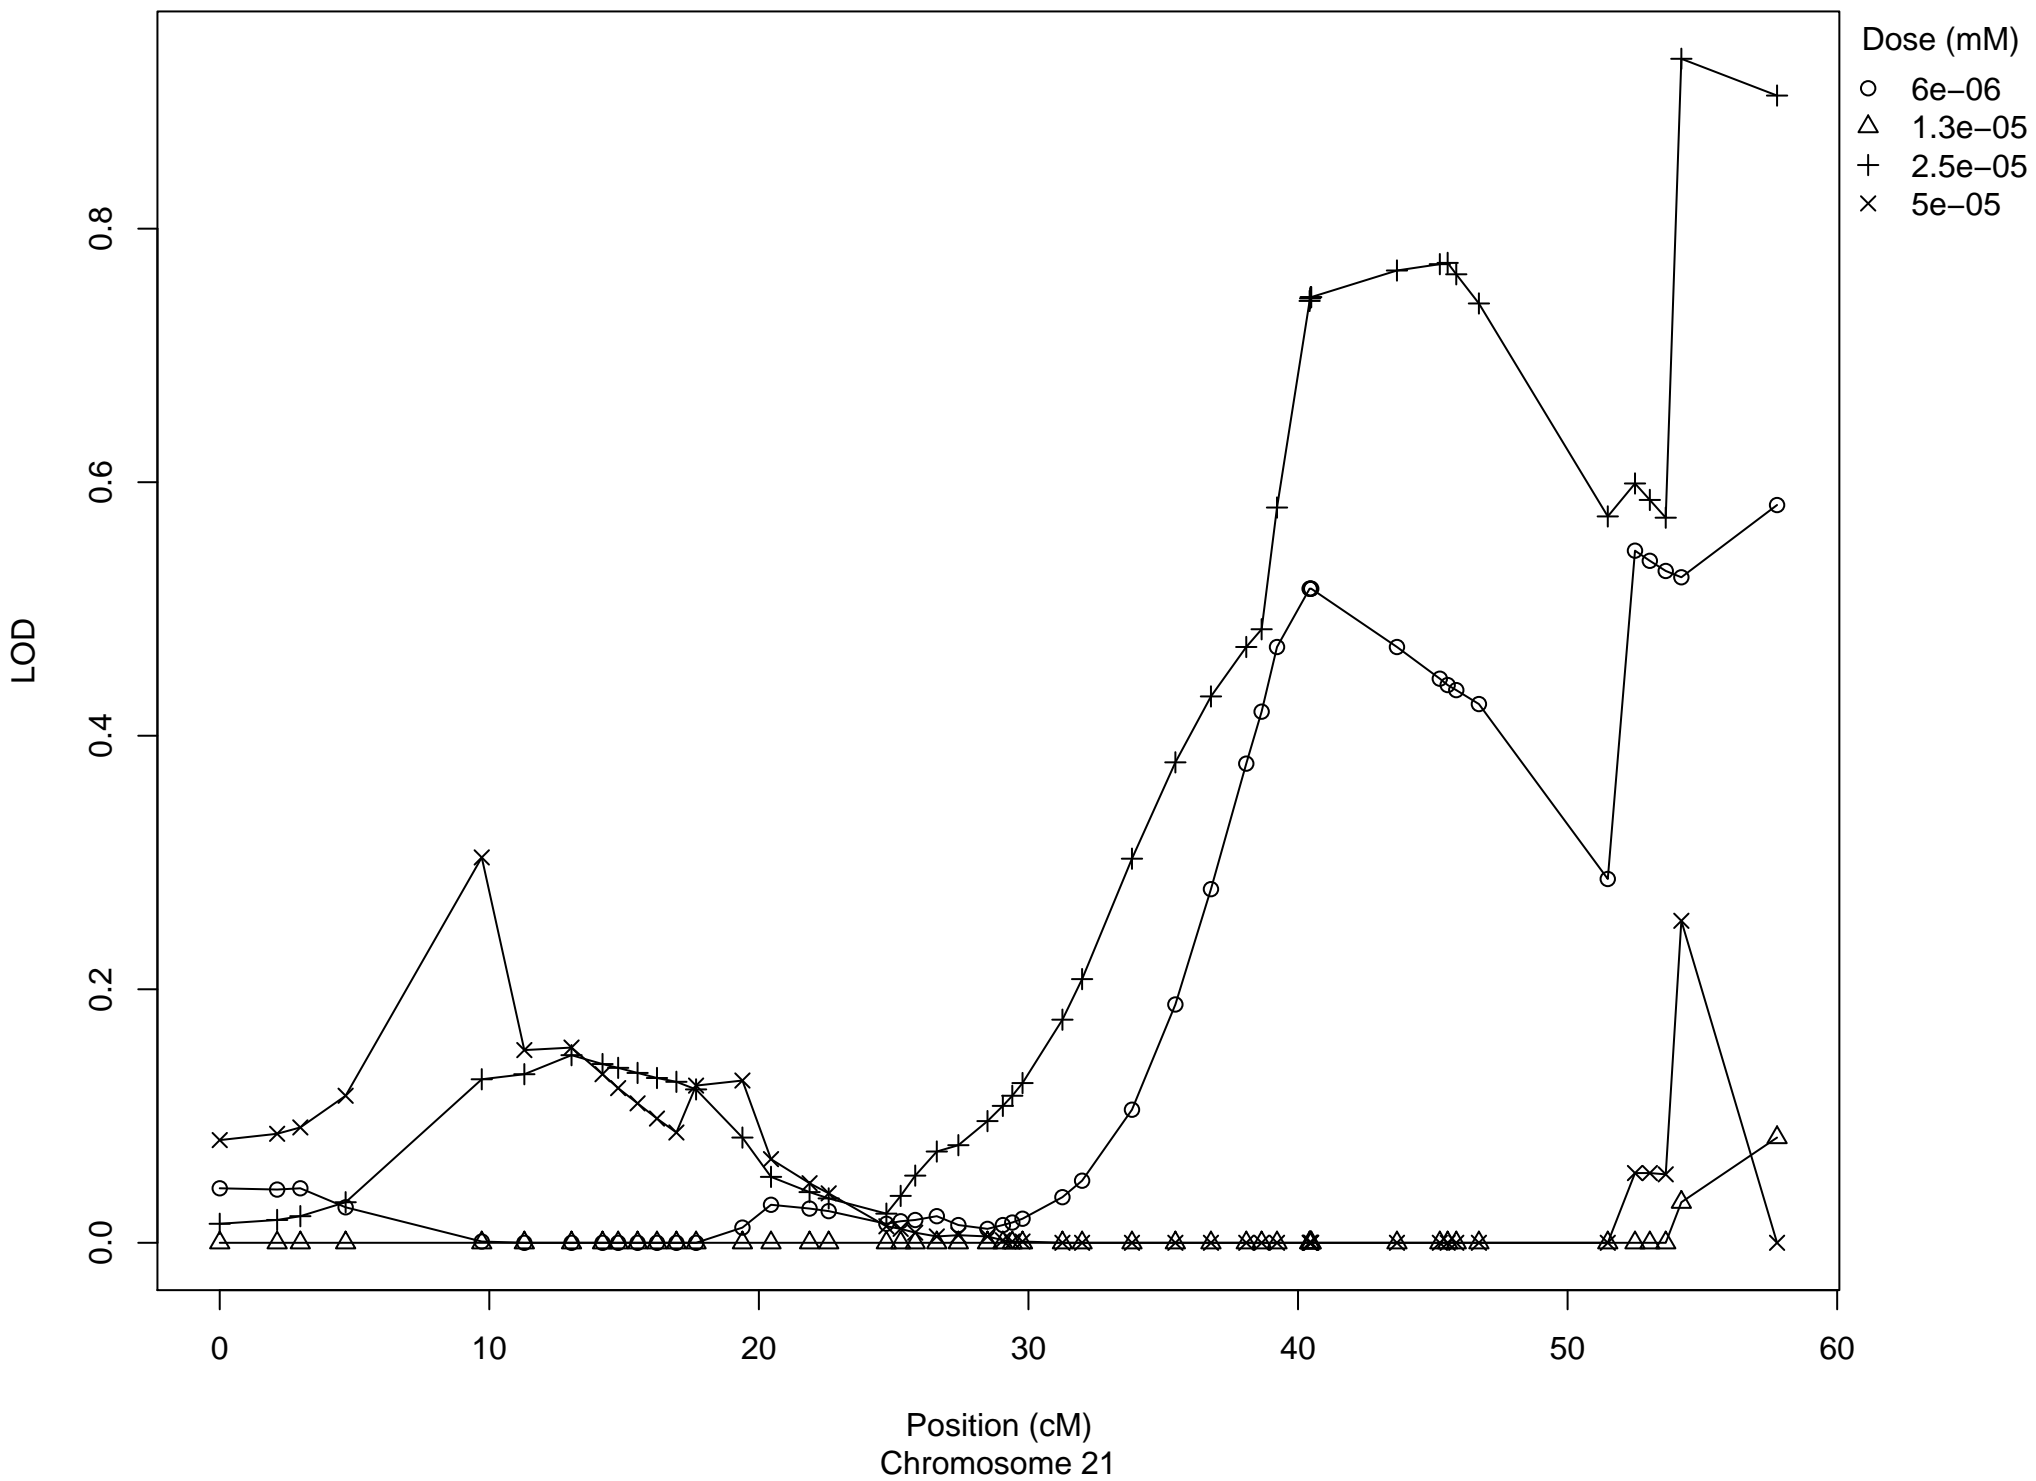

# doxorubicin hydrochloride (Dox)

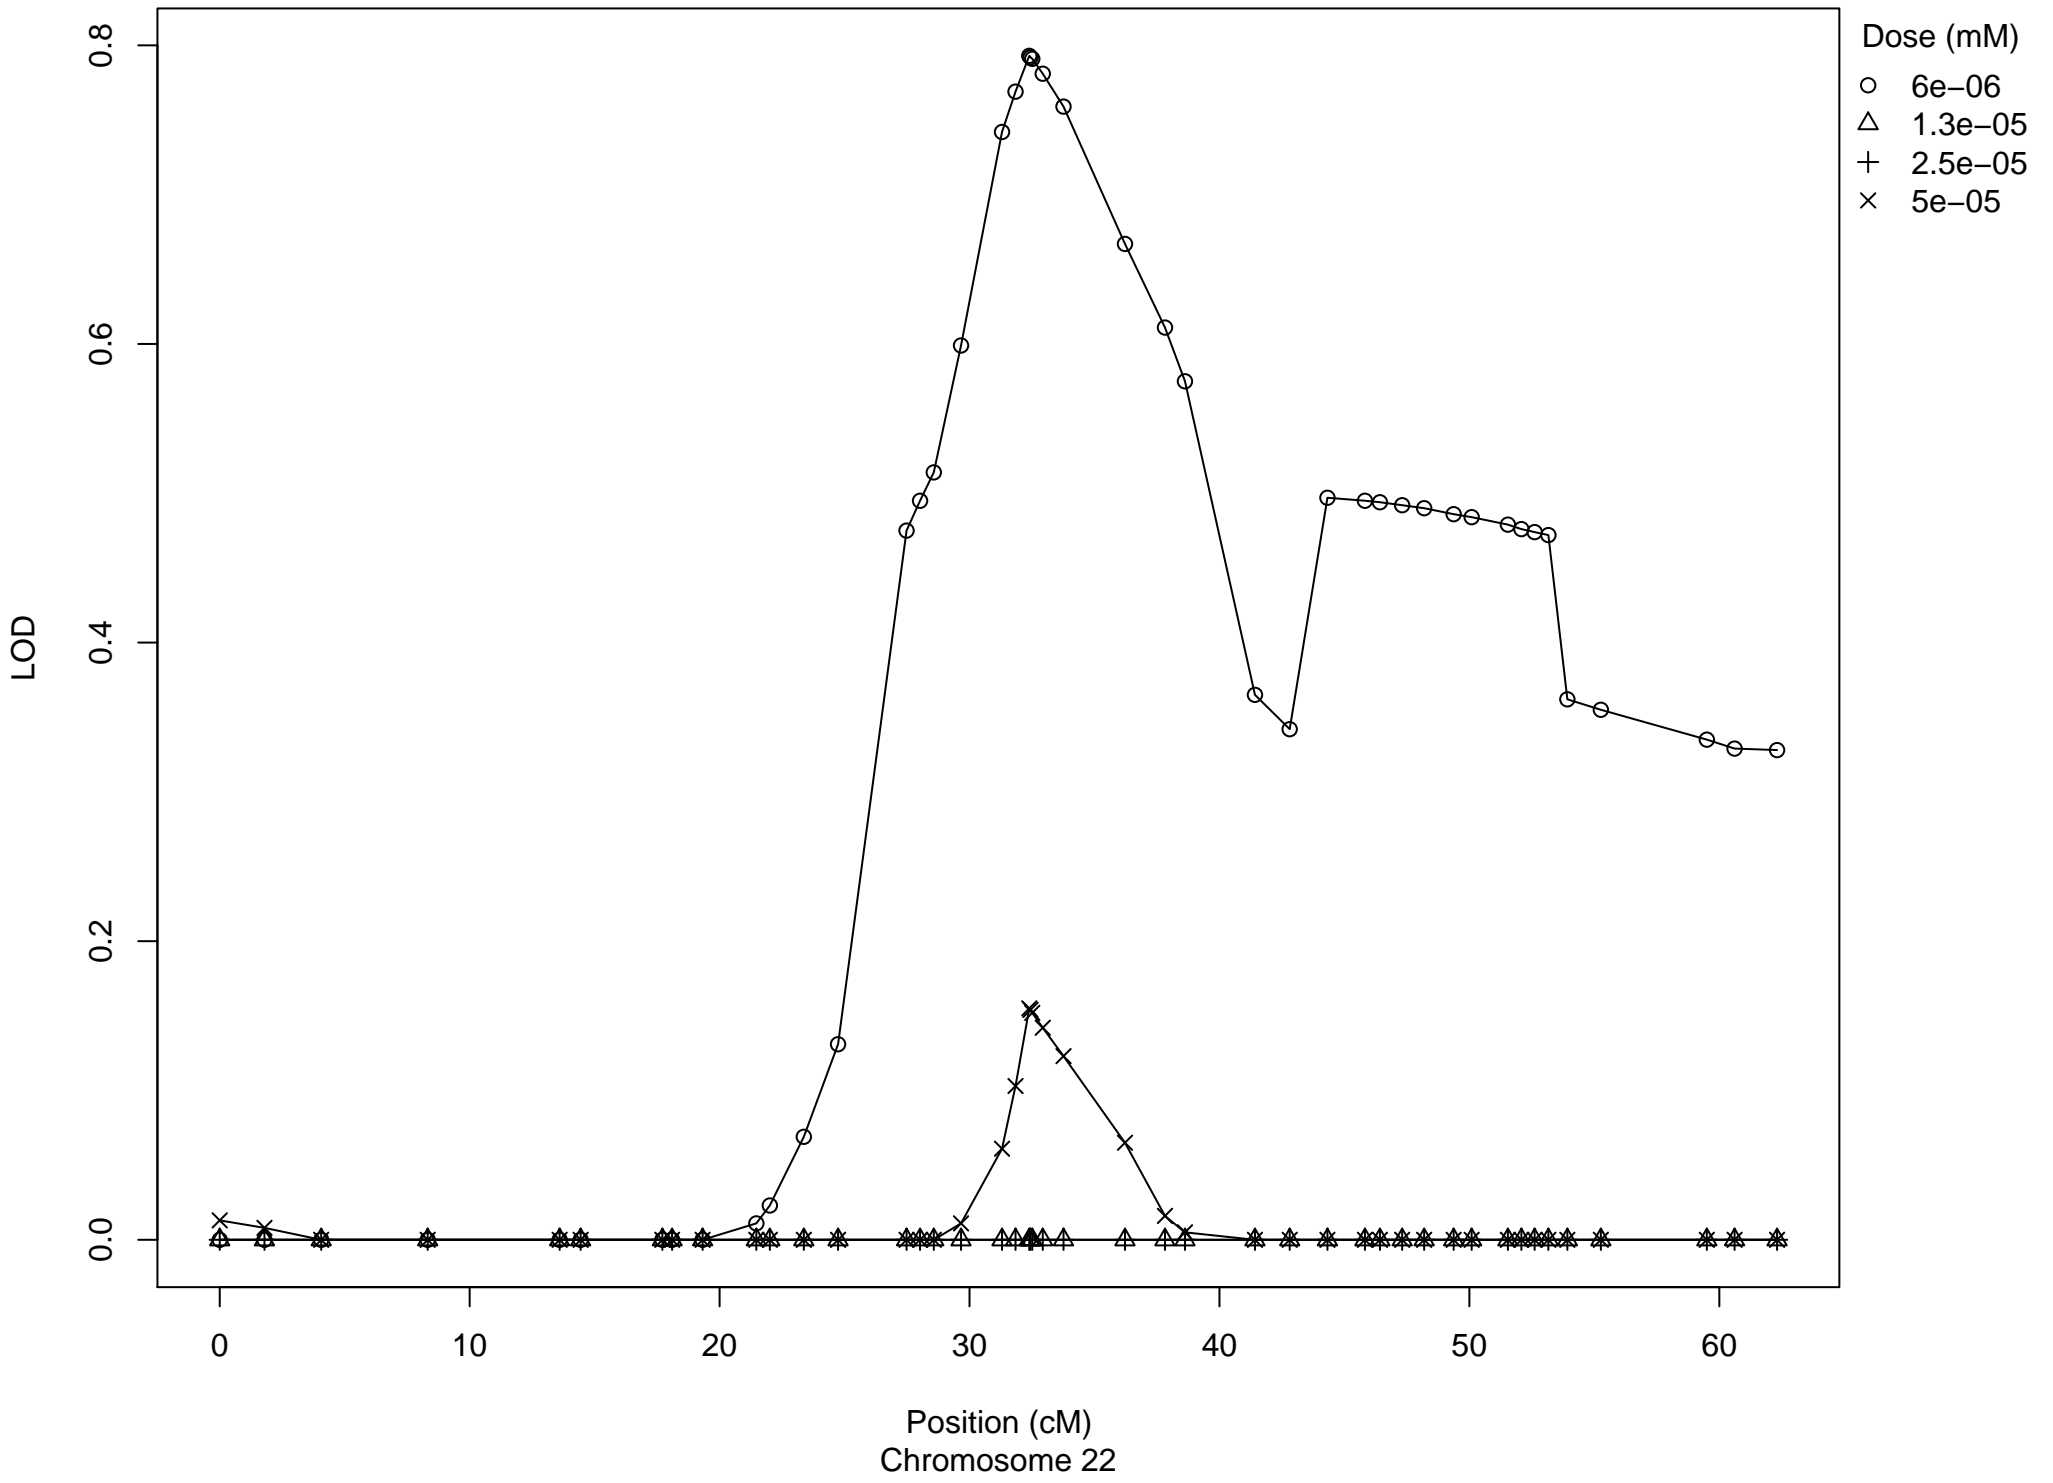

# Epirubicin hydrochloride (Epi)

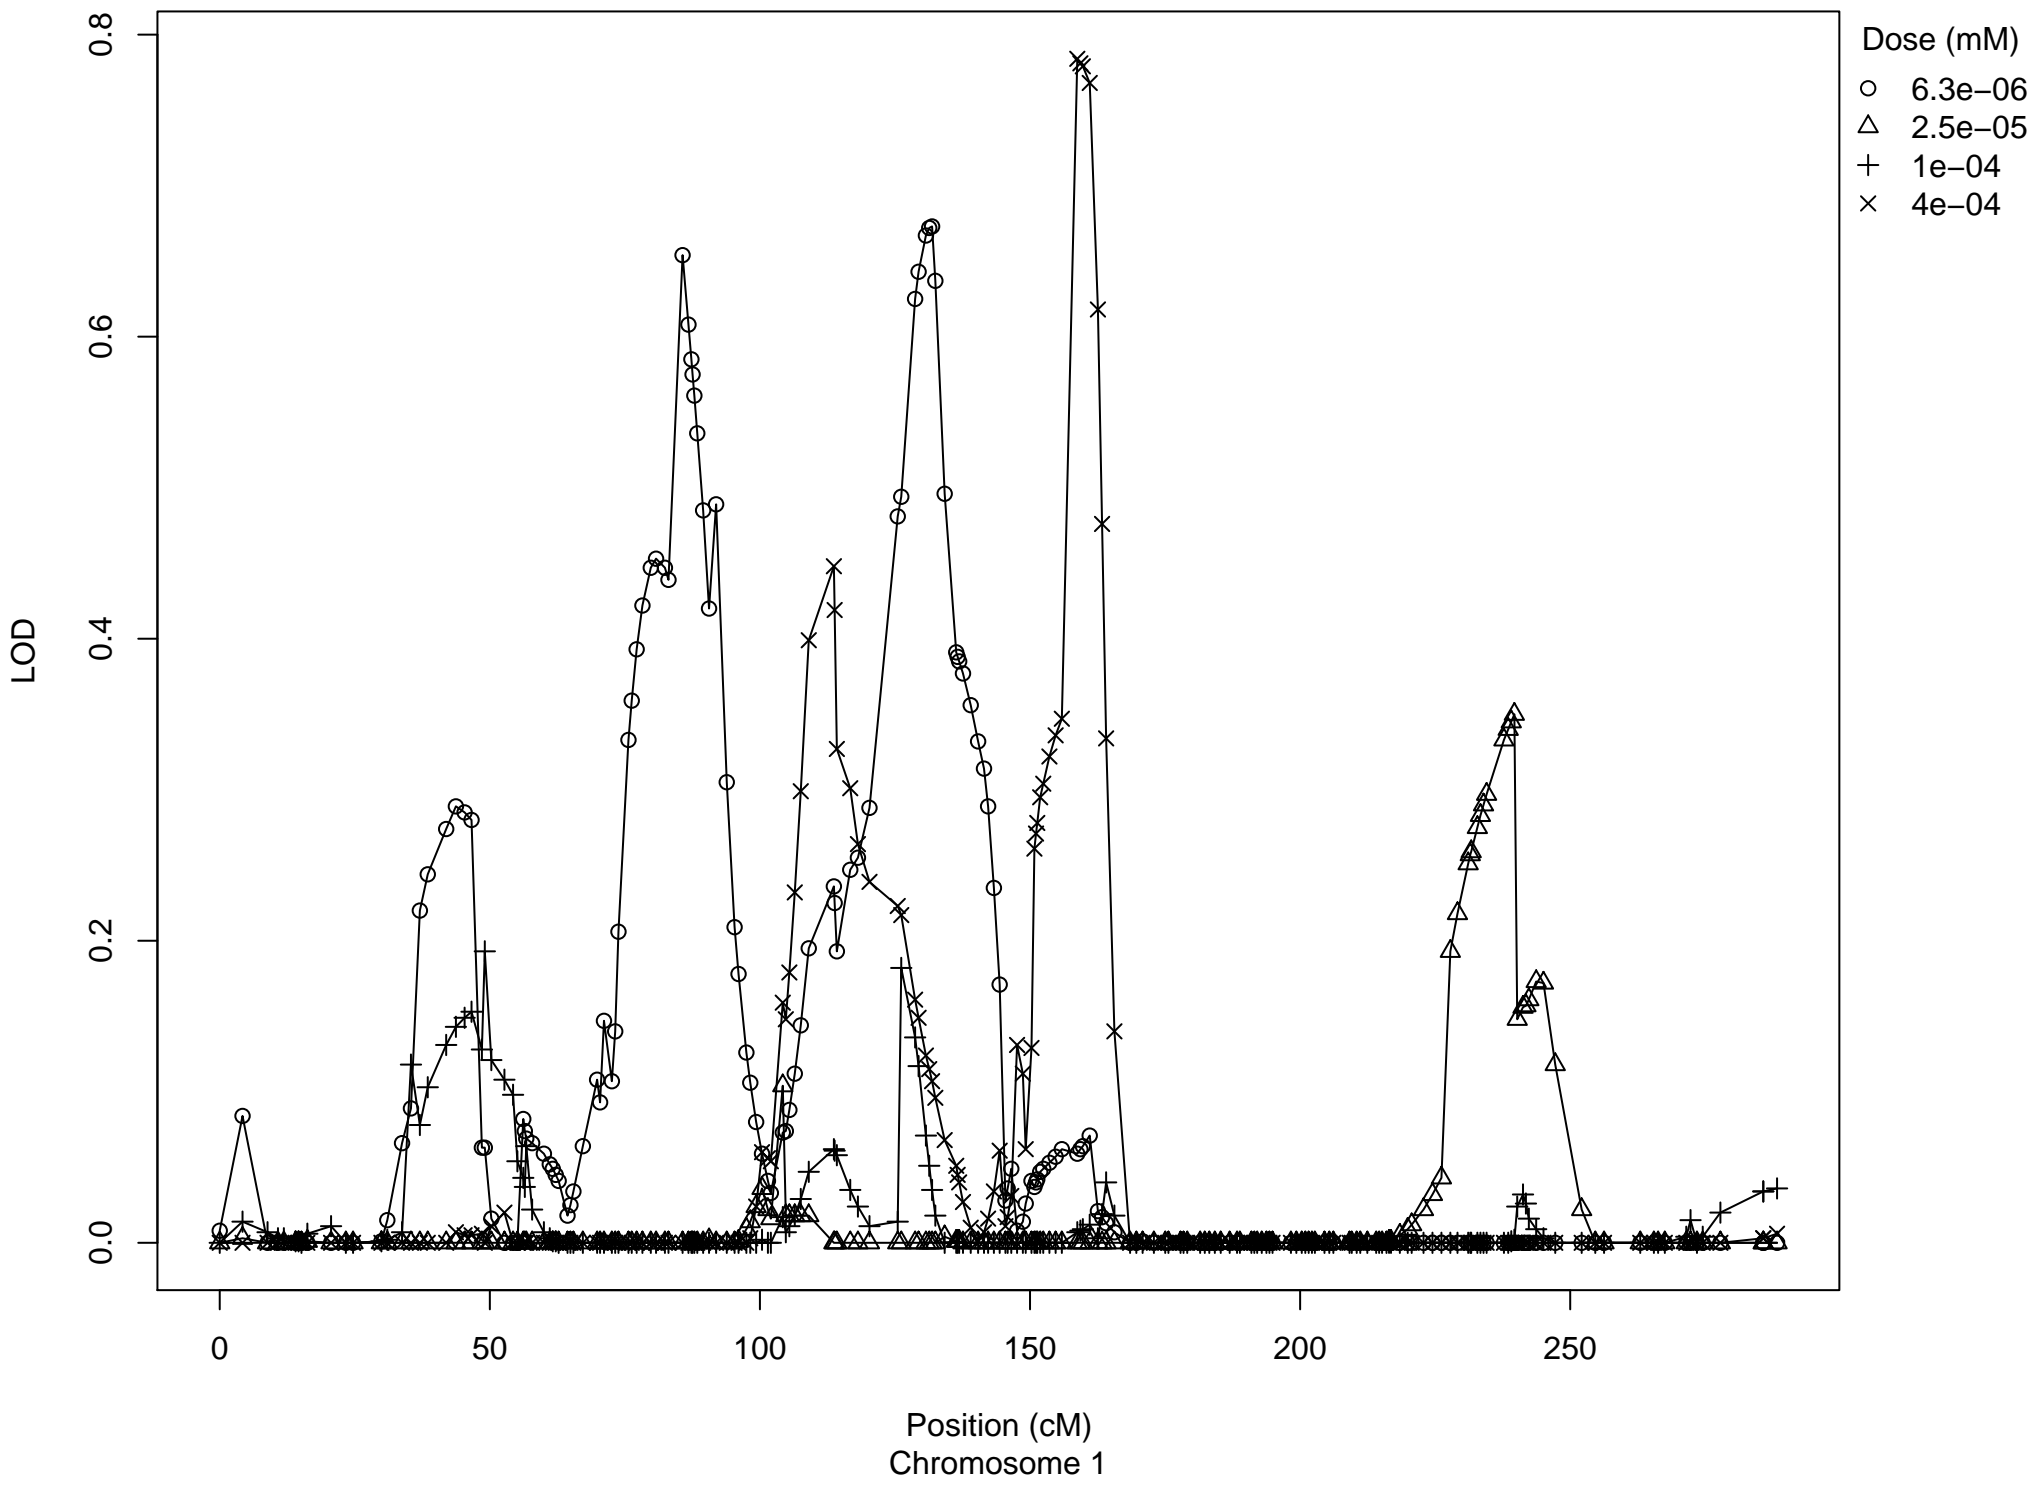

# Epirubicin hydrochloride (Epi)

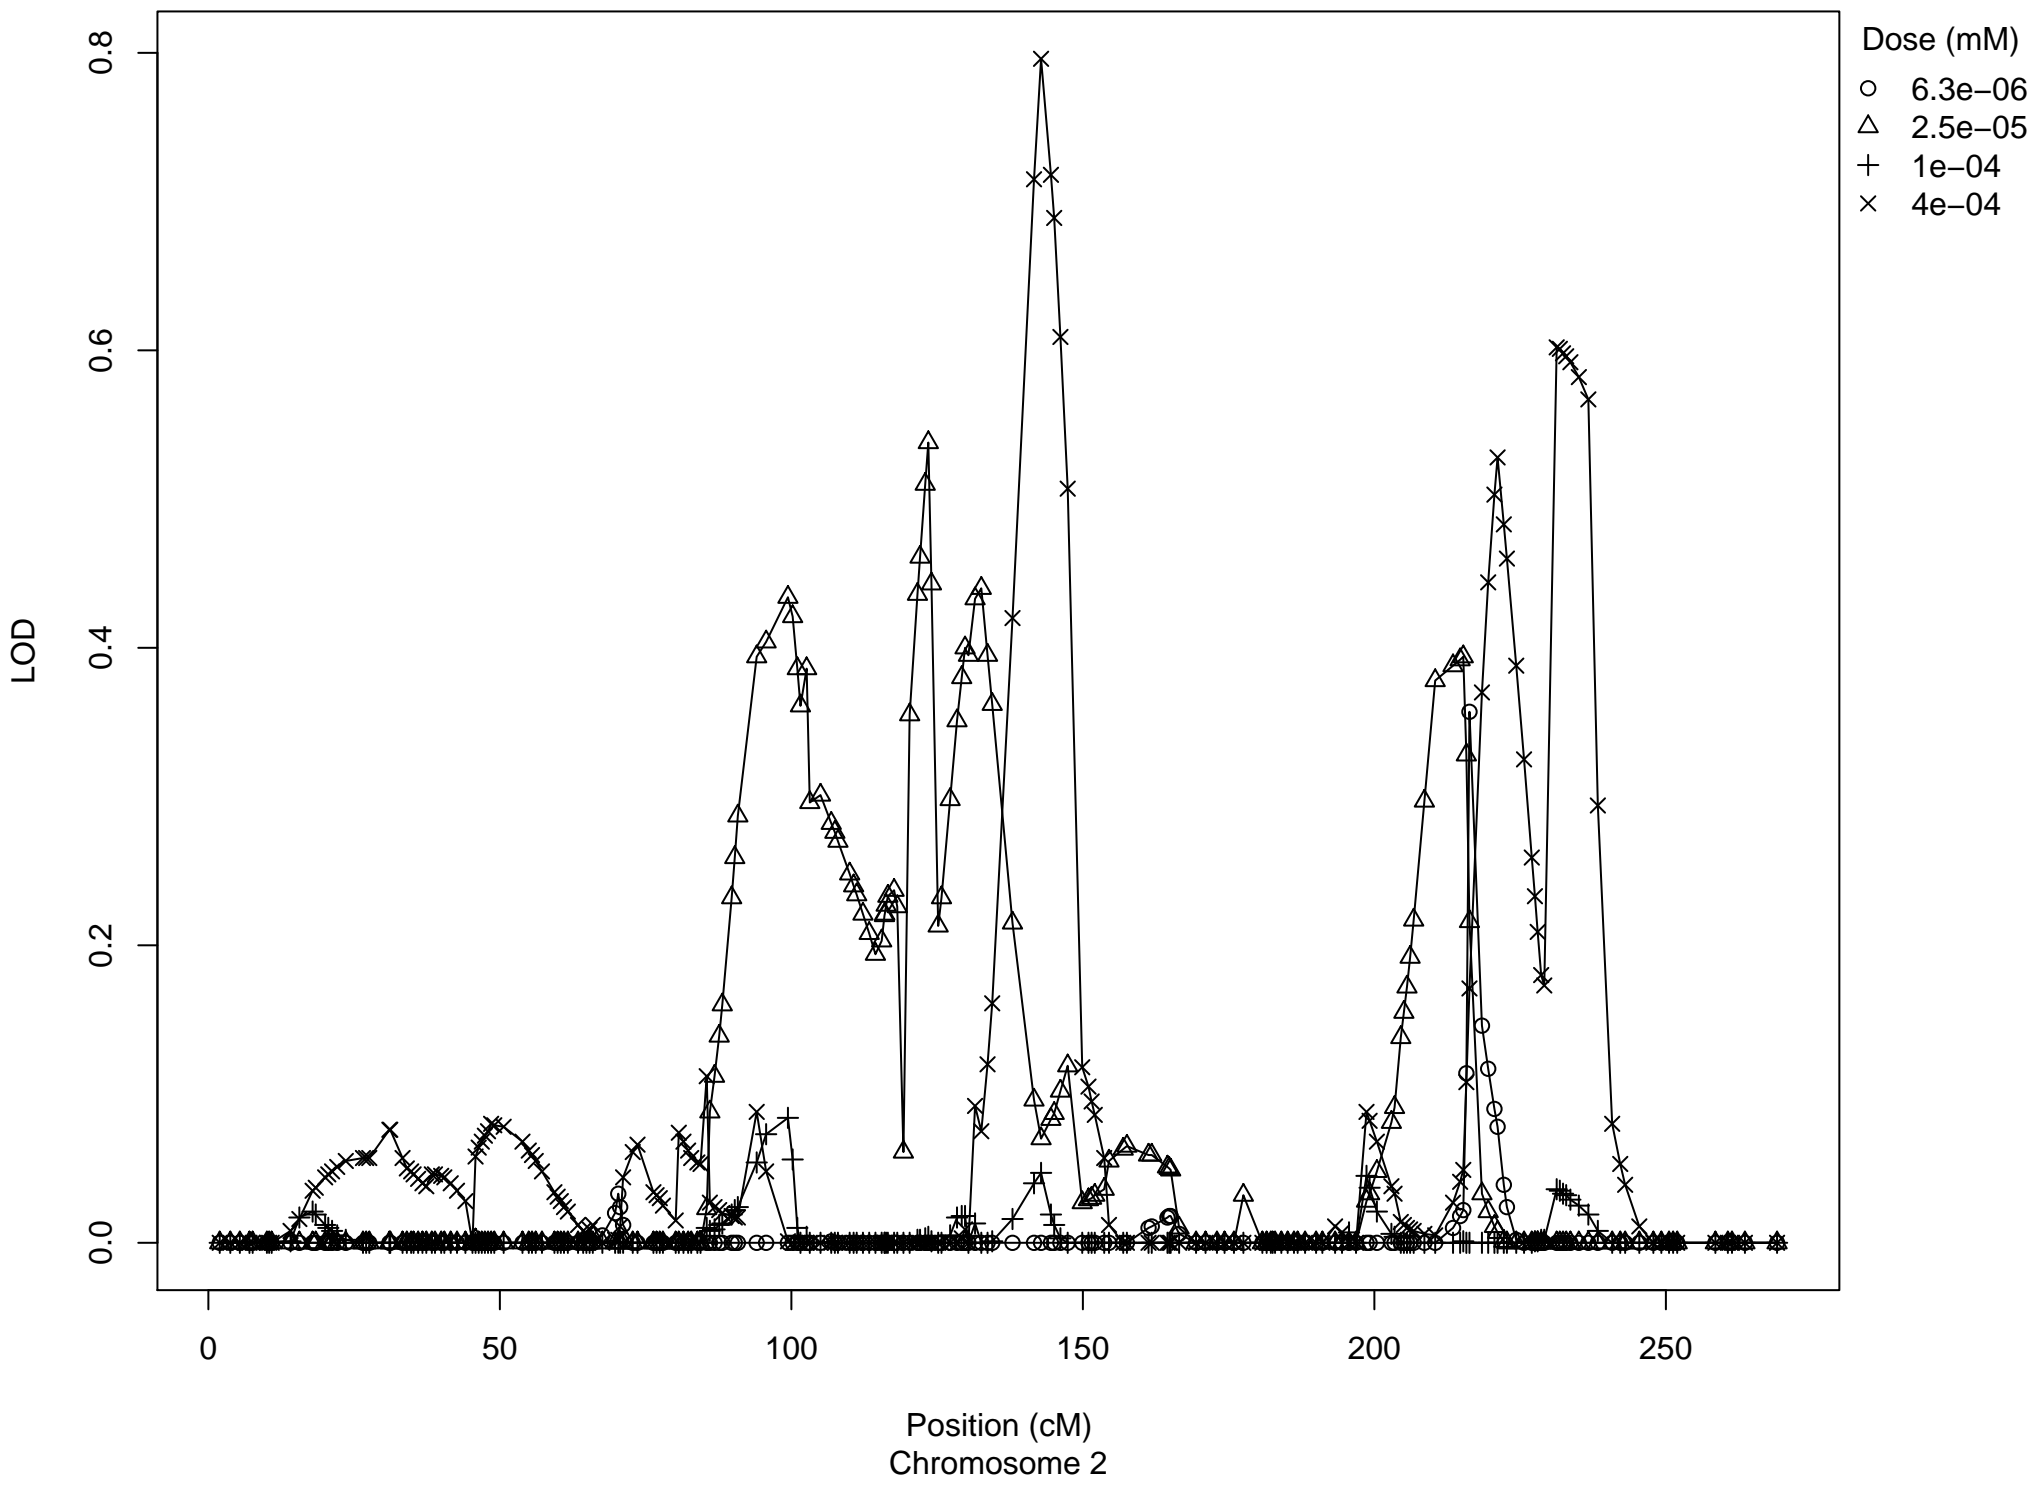



# Epirubicin hydrochloride (Epi)

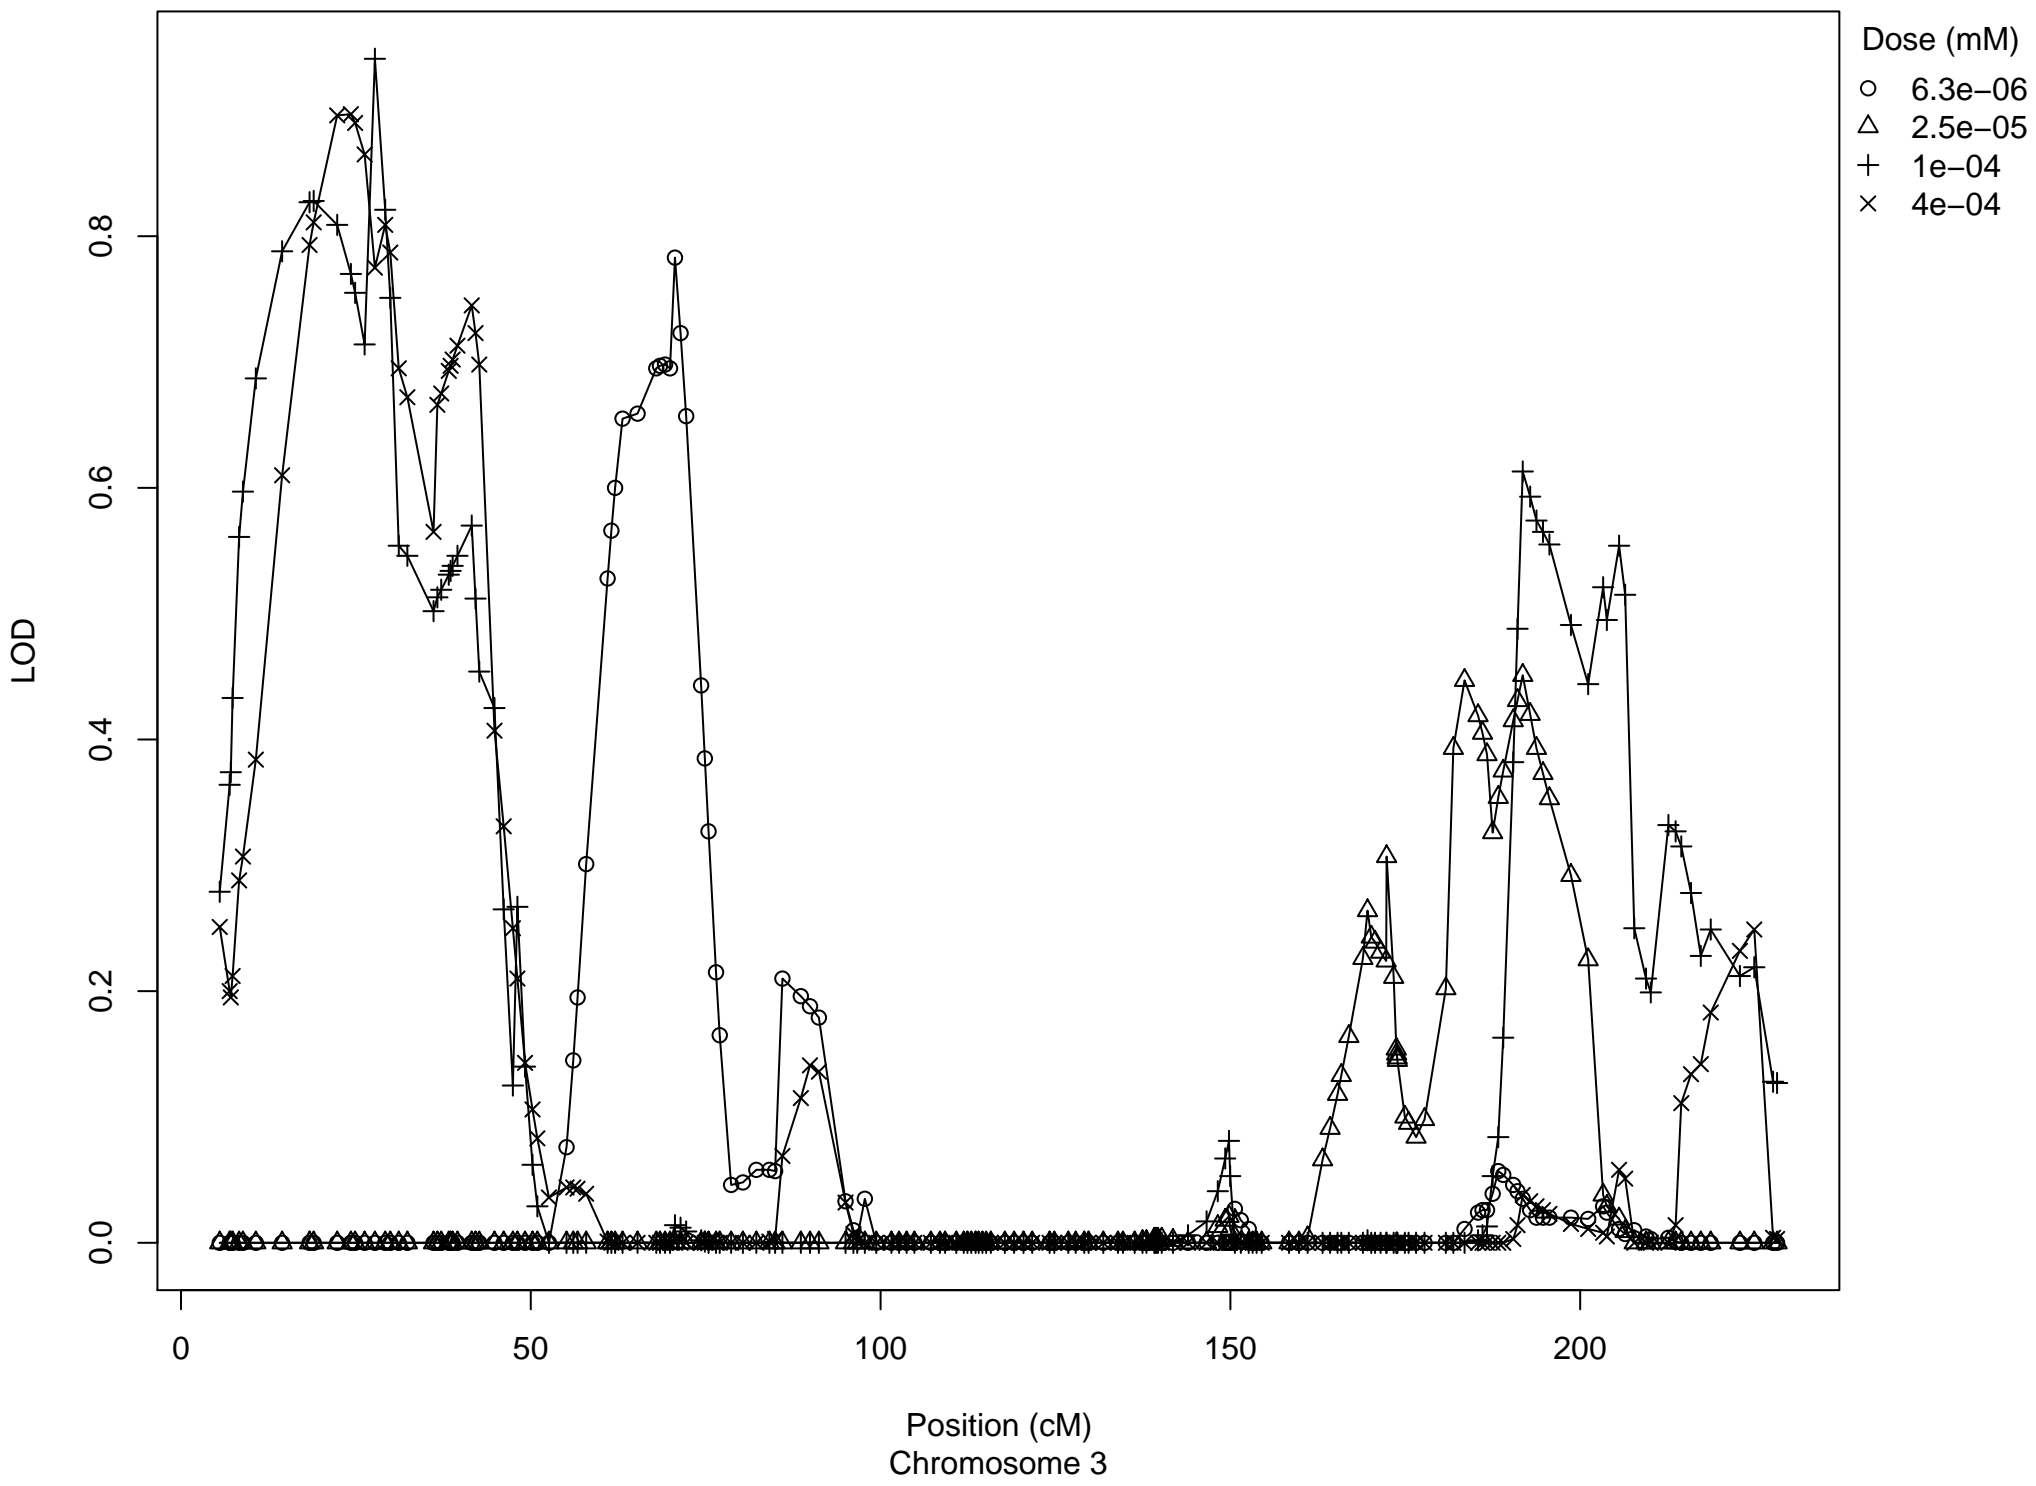

# Epirubicin hydrochloride (Epi)

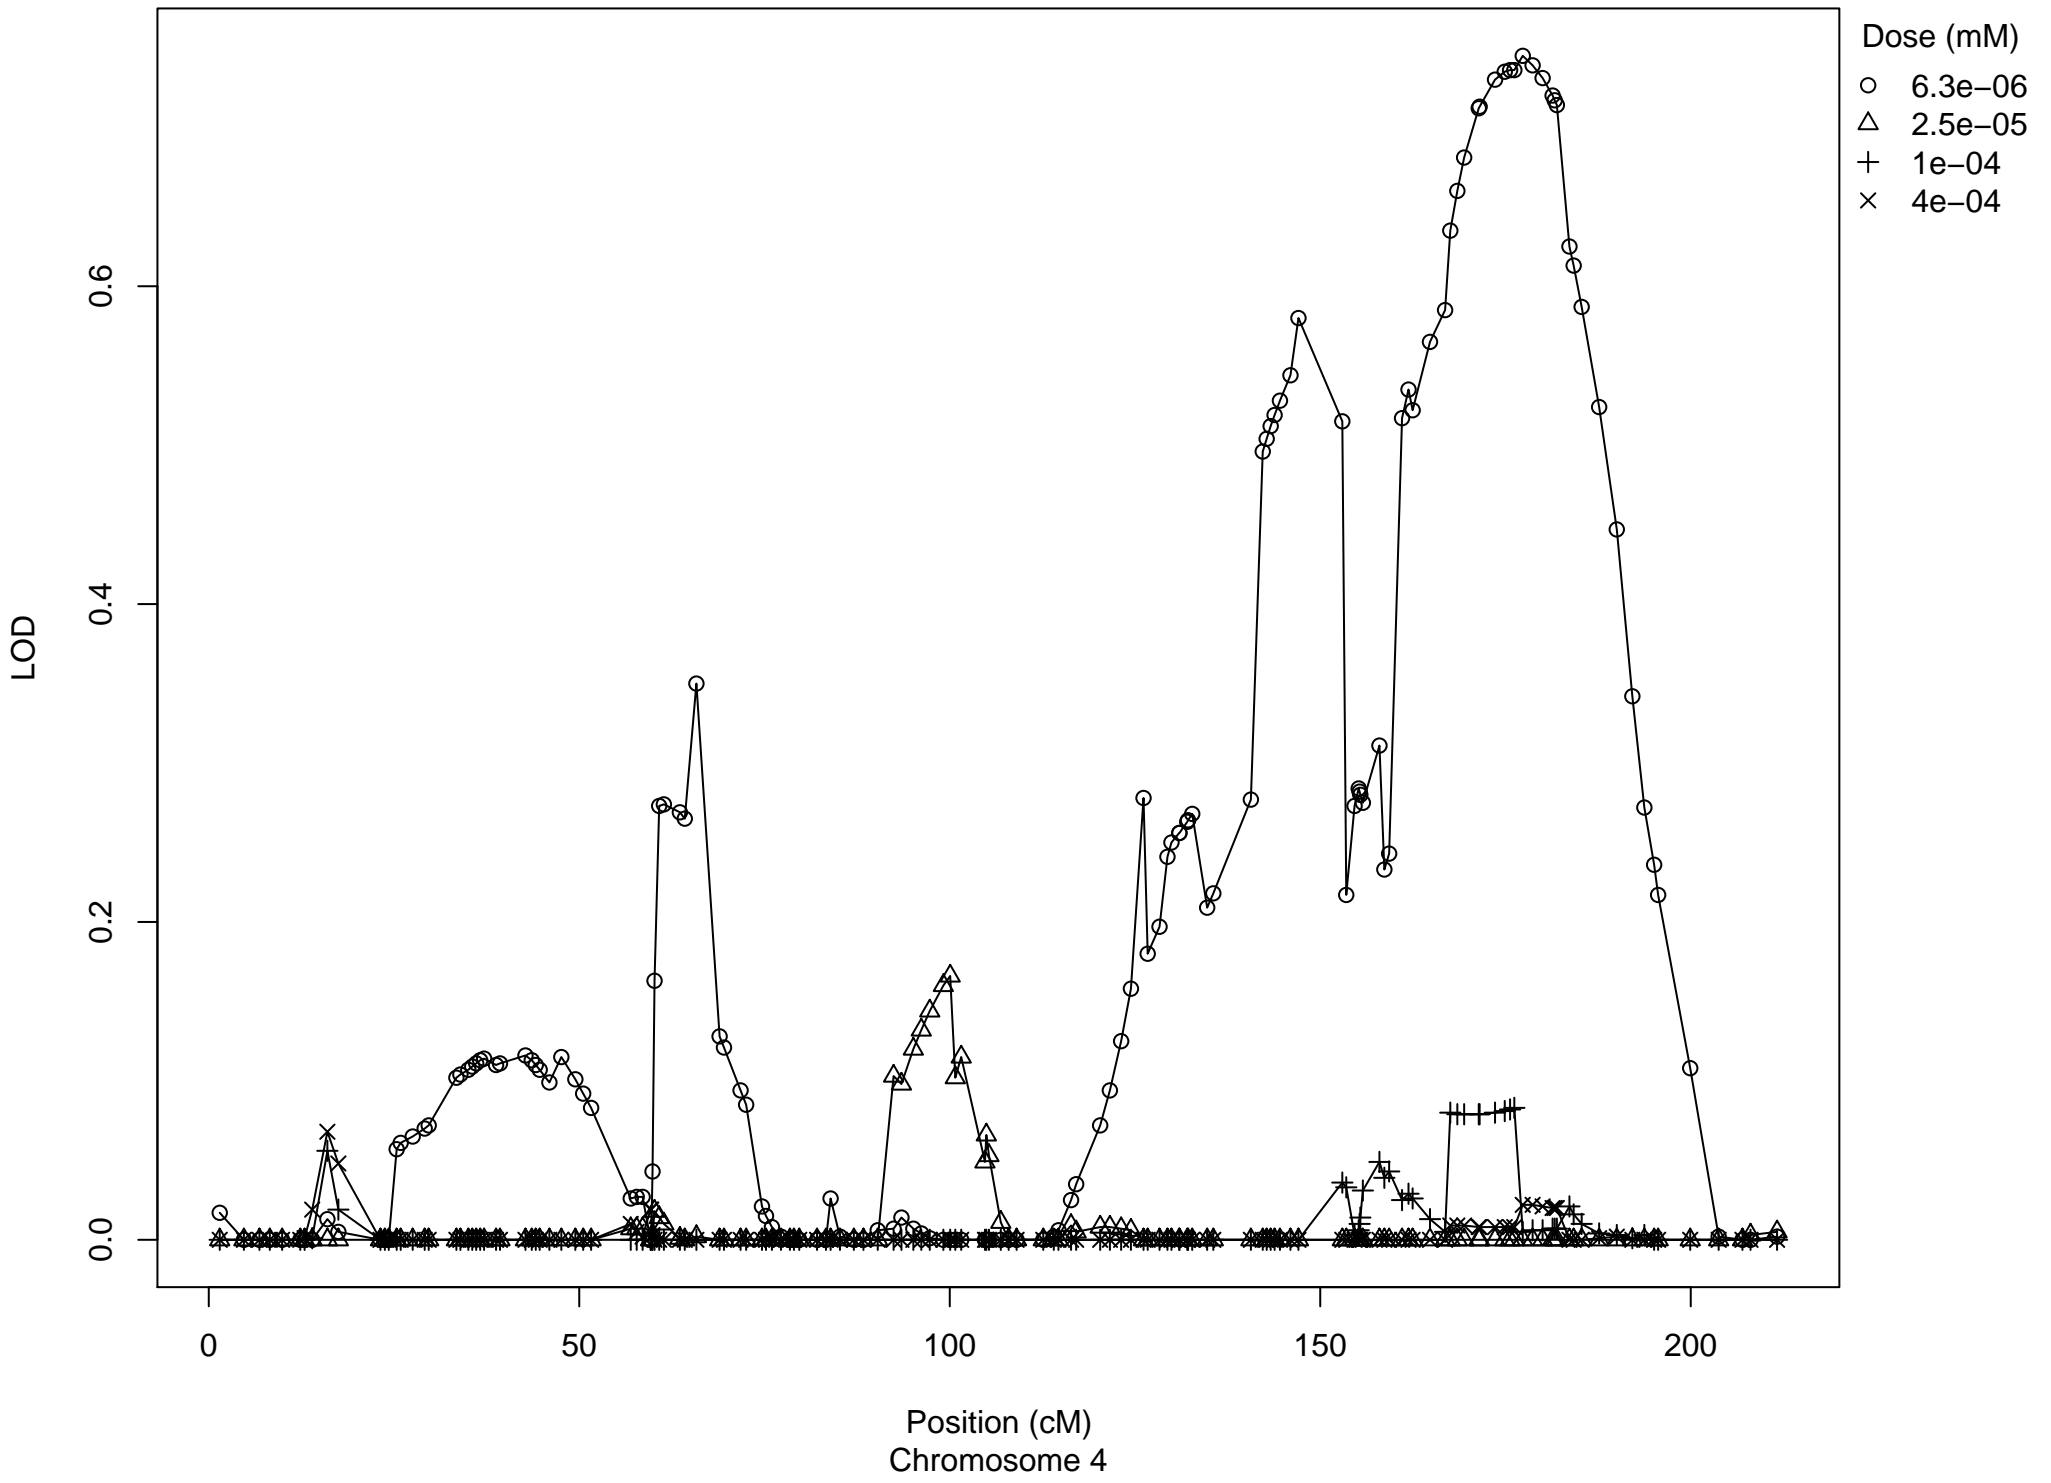

# Epirubicin hydrochloride (Epi)

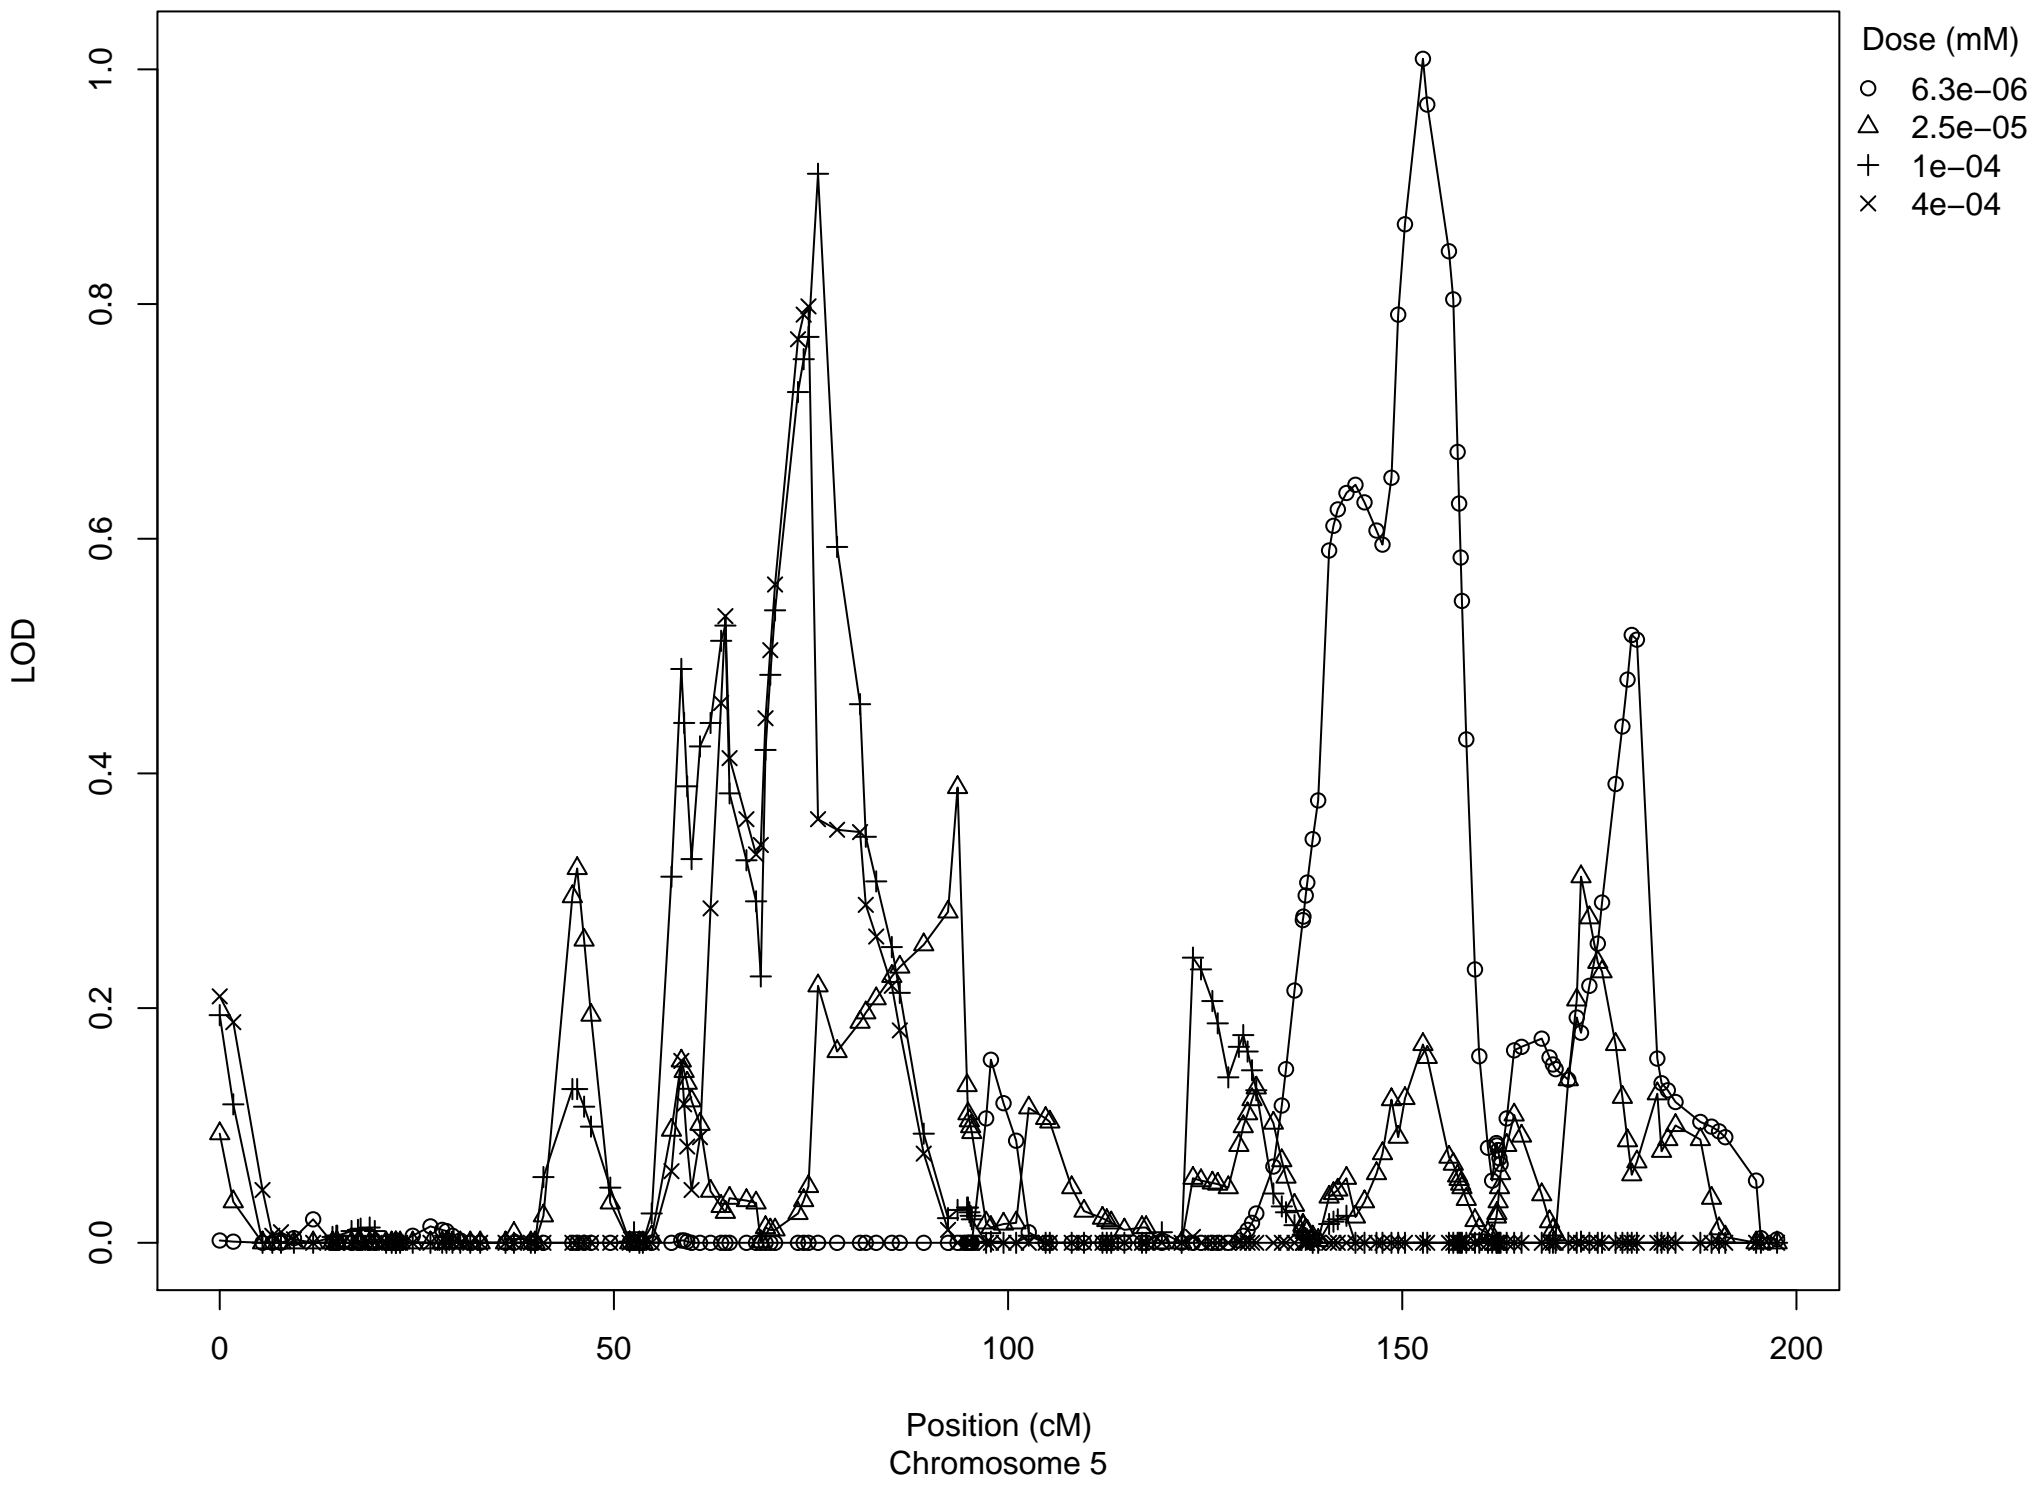

# Epirubicin hydrochloride (Epi)

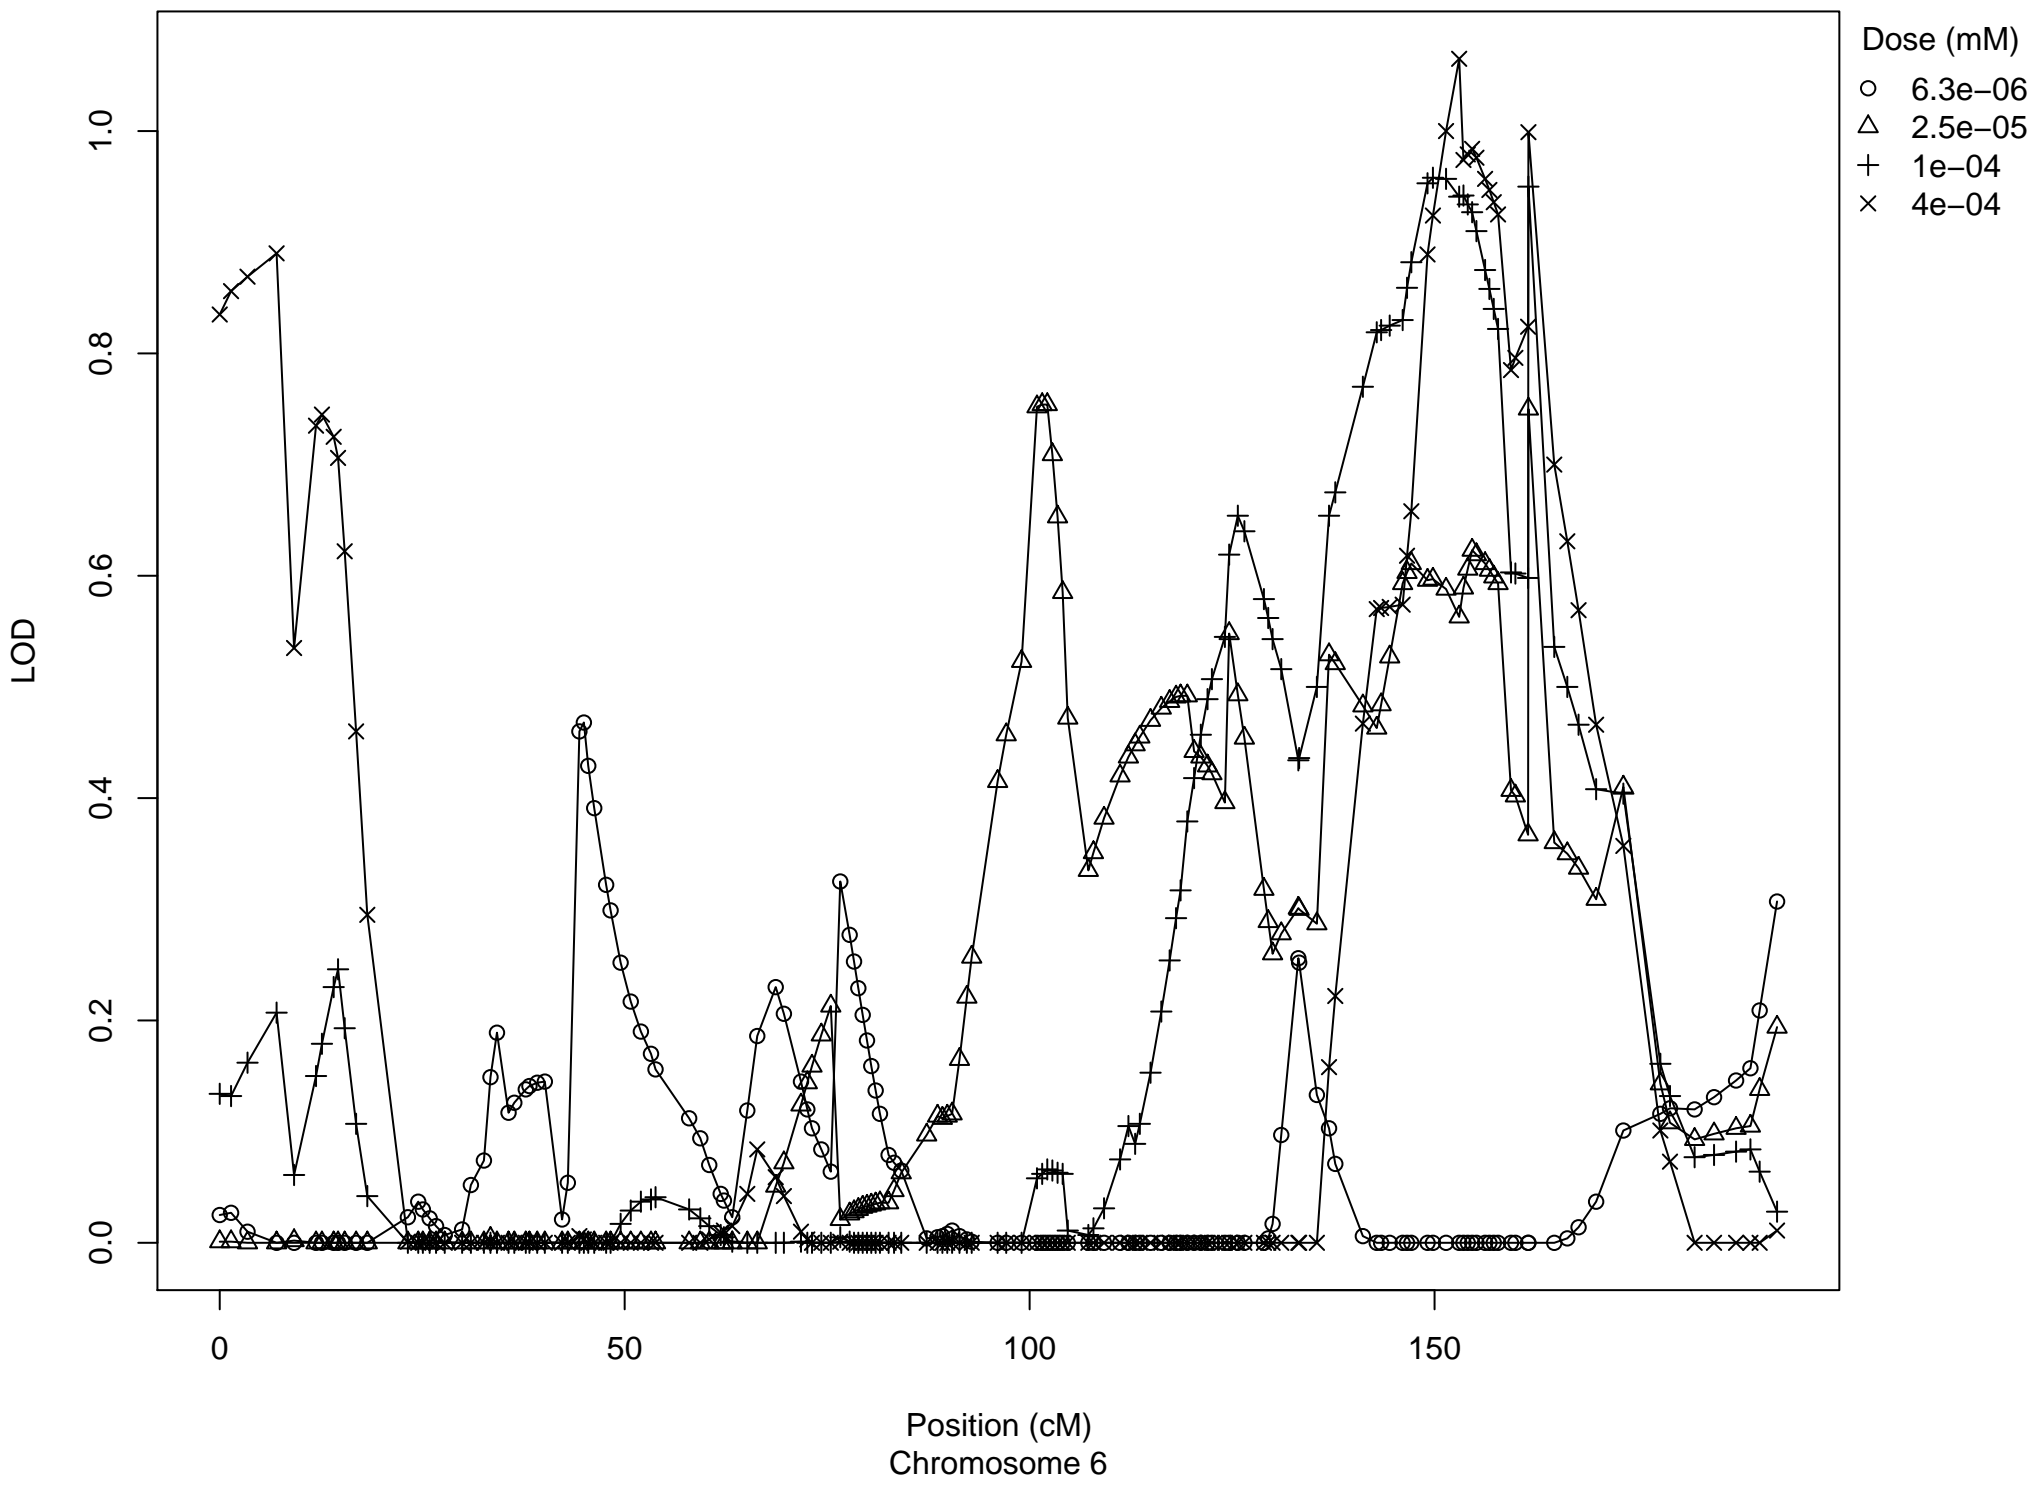

# Epirubicin hydrochloride (Epi)

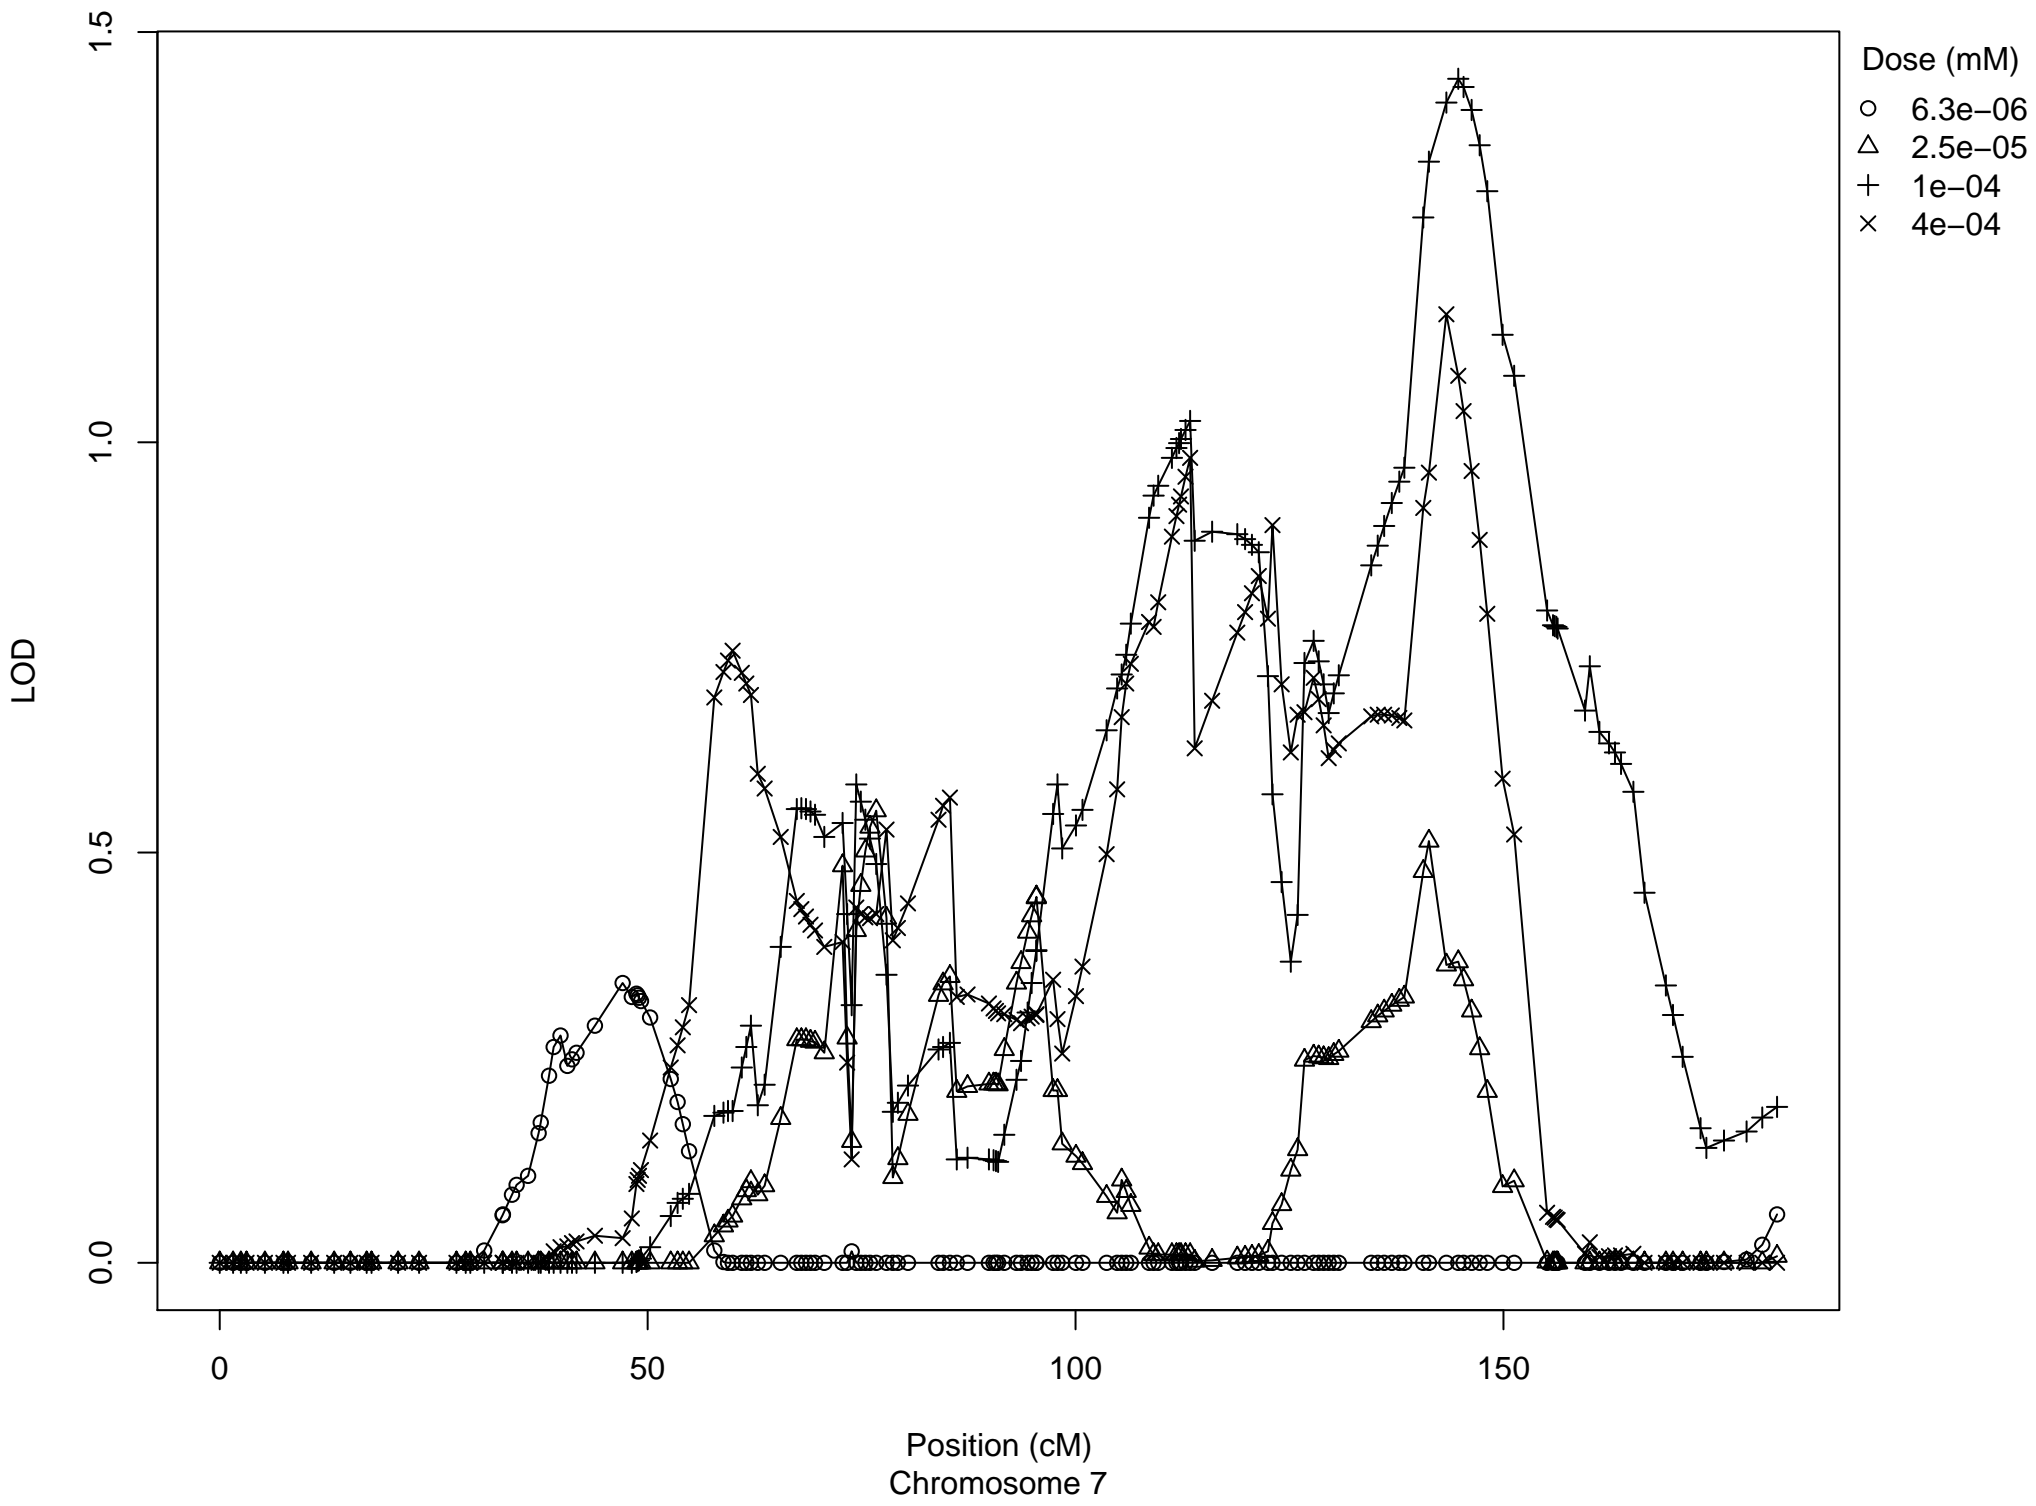

# Epirubicin hydrochloride (Epi)

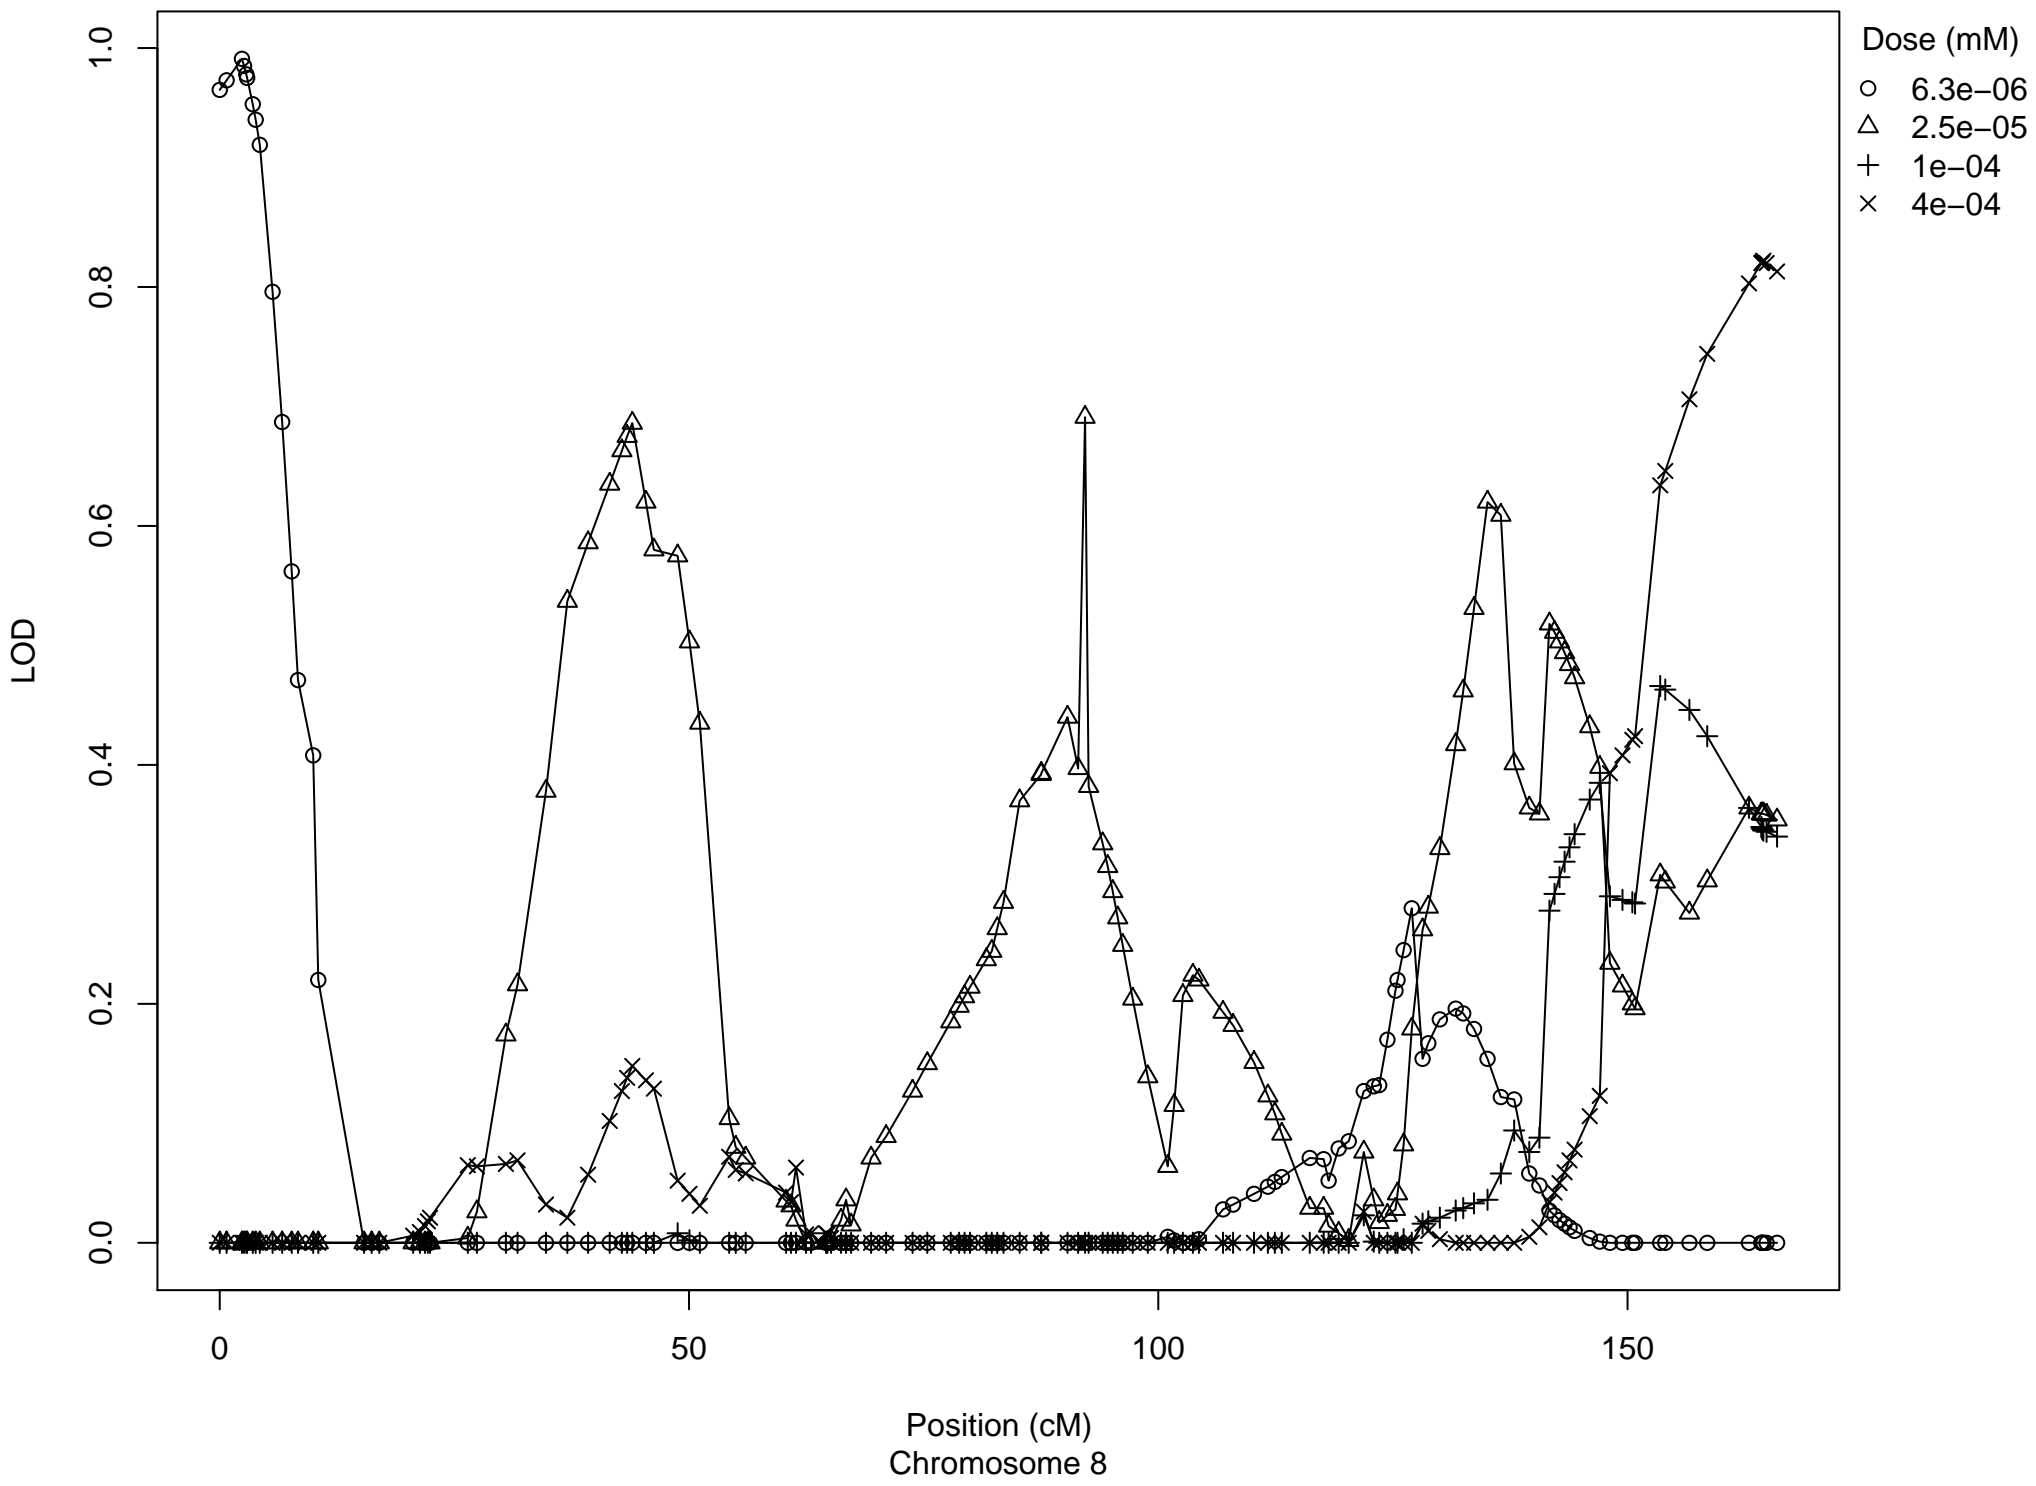

# Epirubicin hydrochloride (Epi)

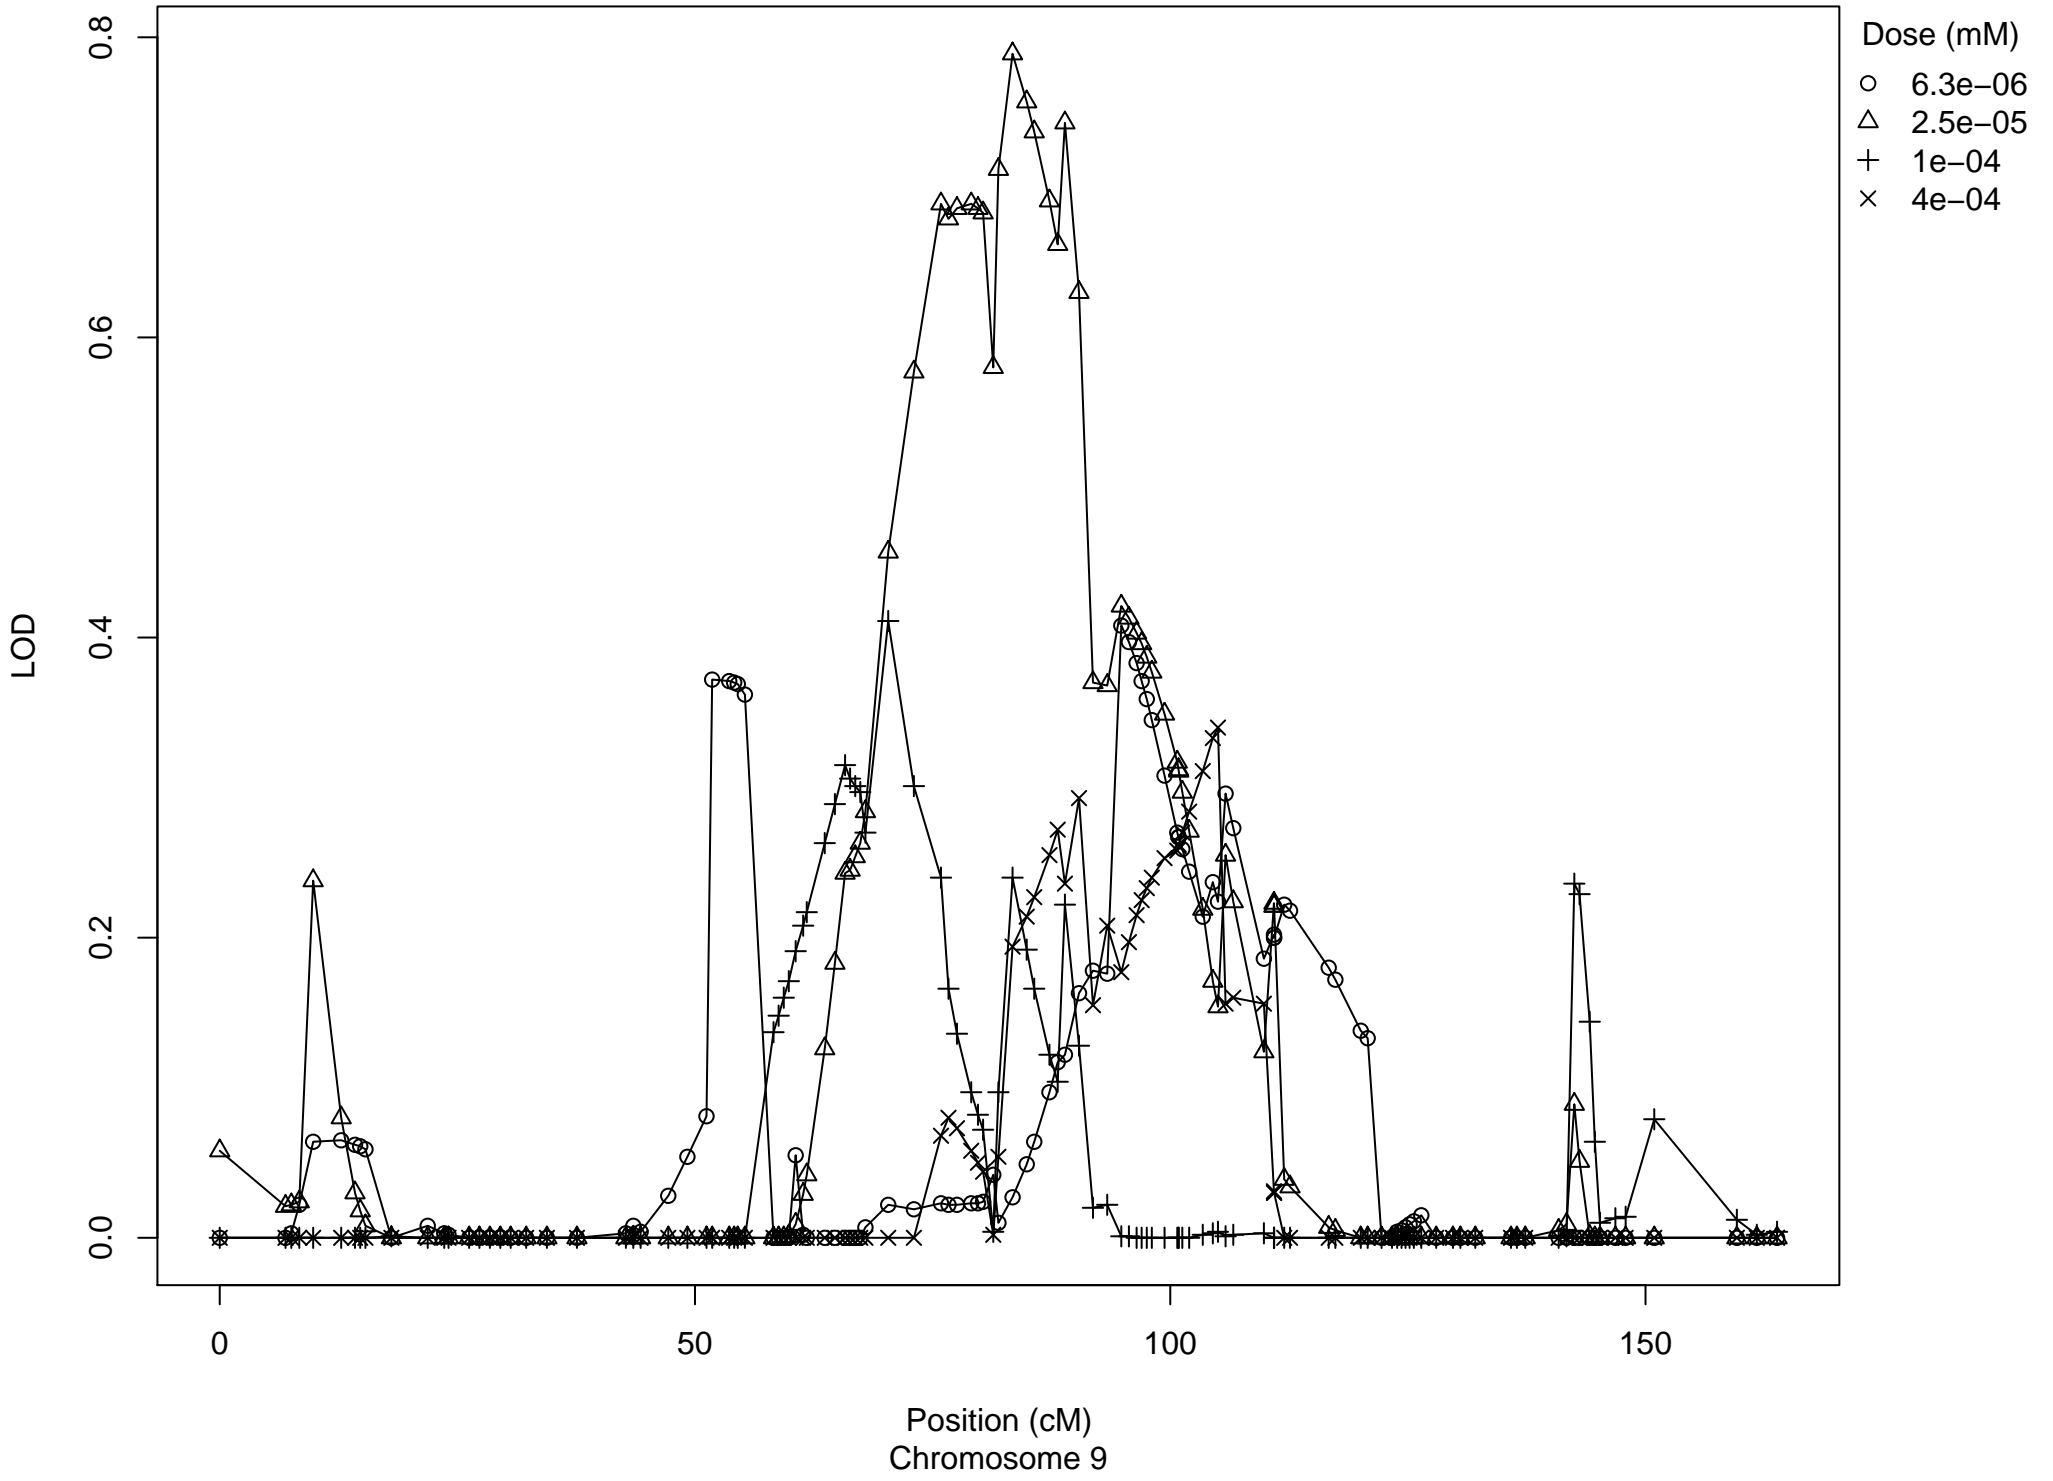

# Epirubicin hydrochloride (Epi)

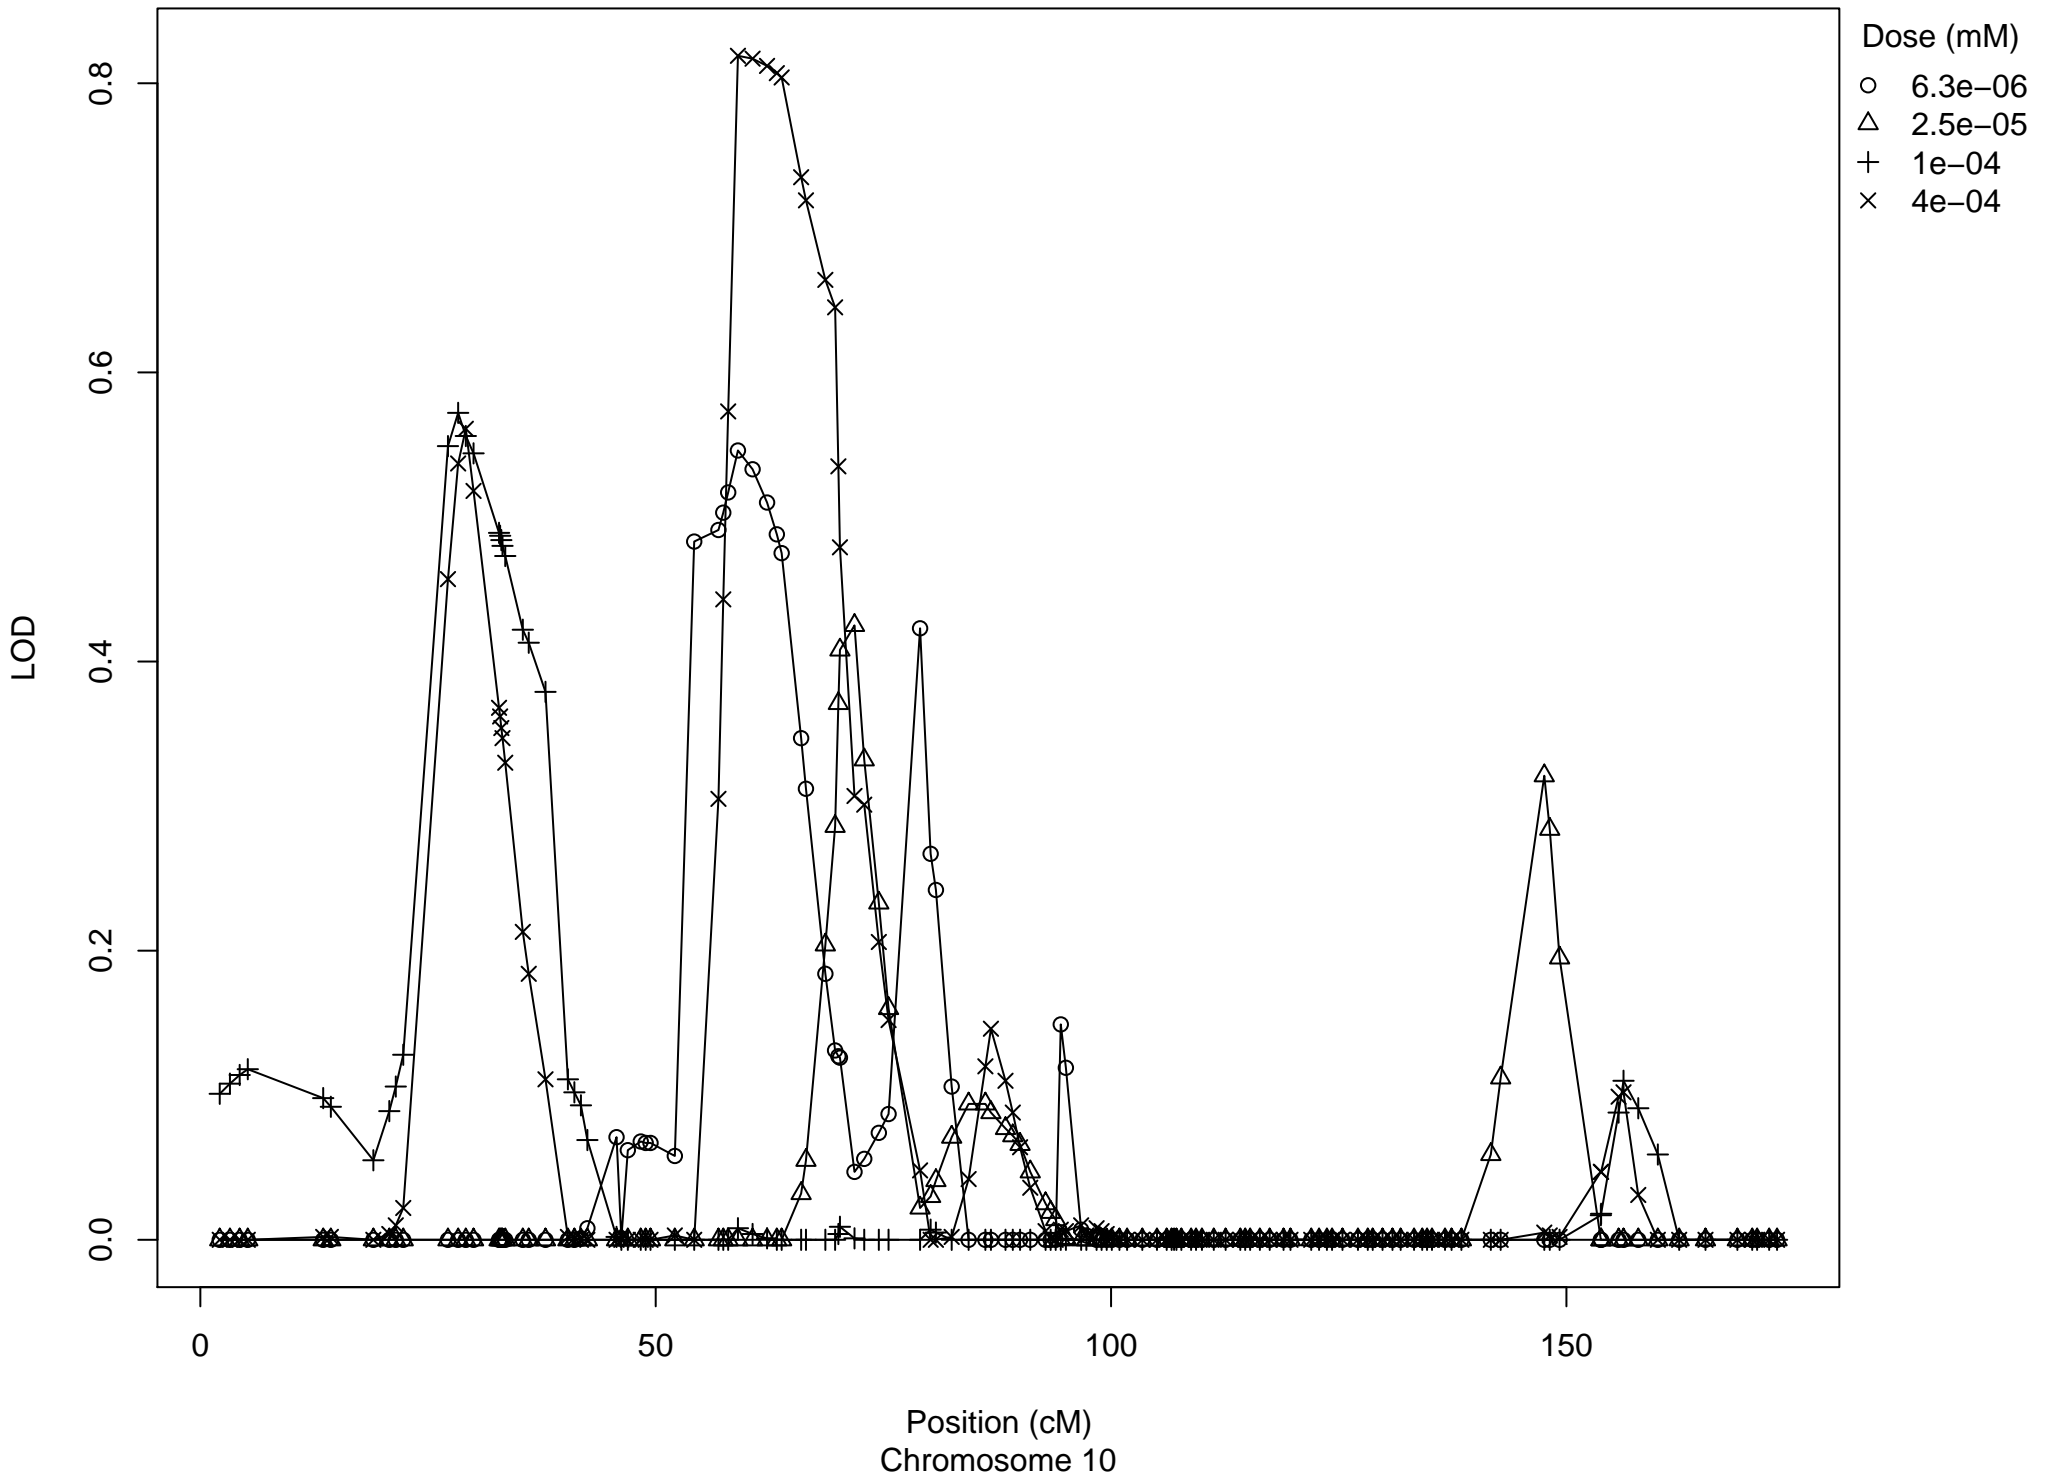



# Epirubicin hydrochloride (Epi)

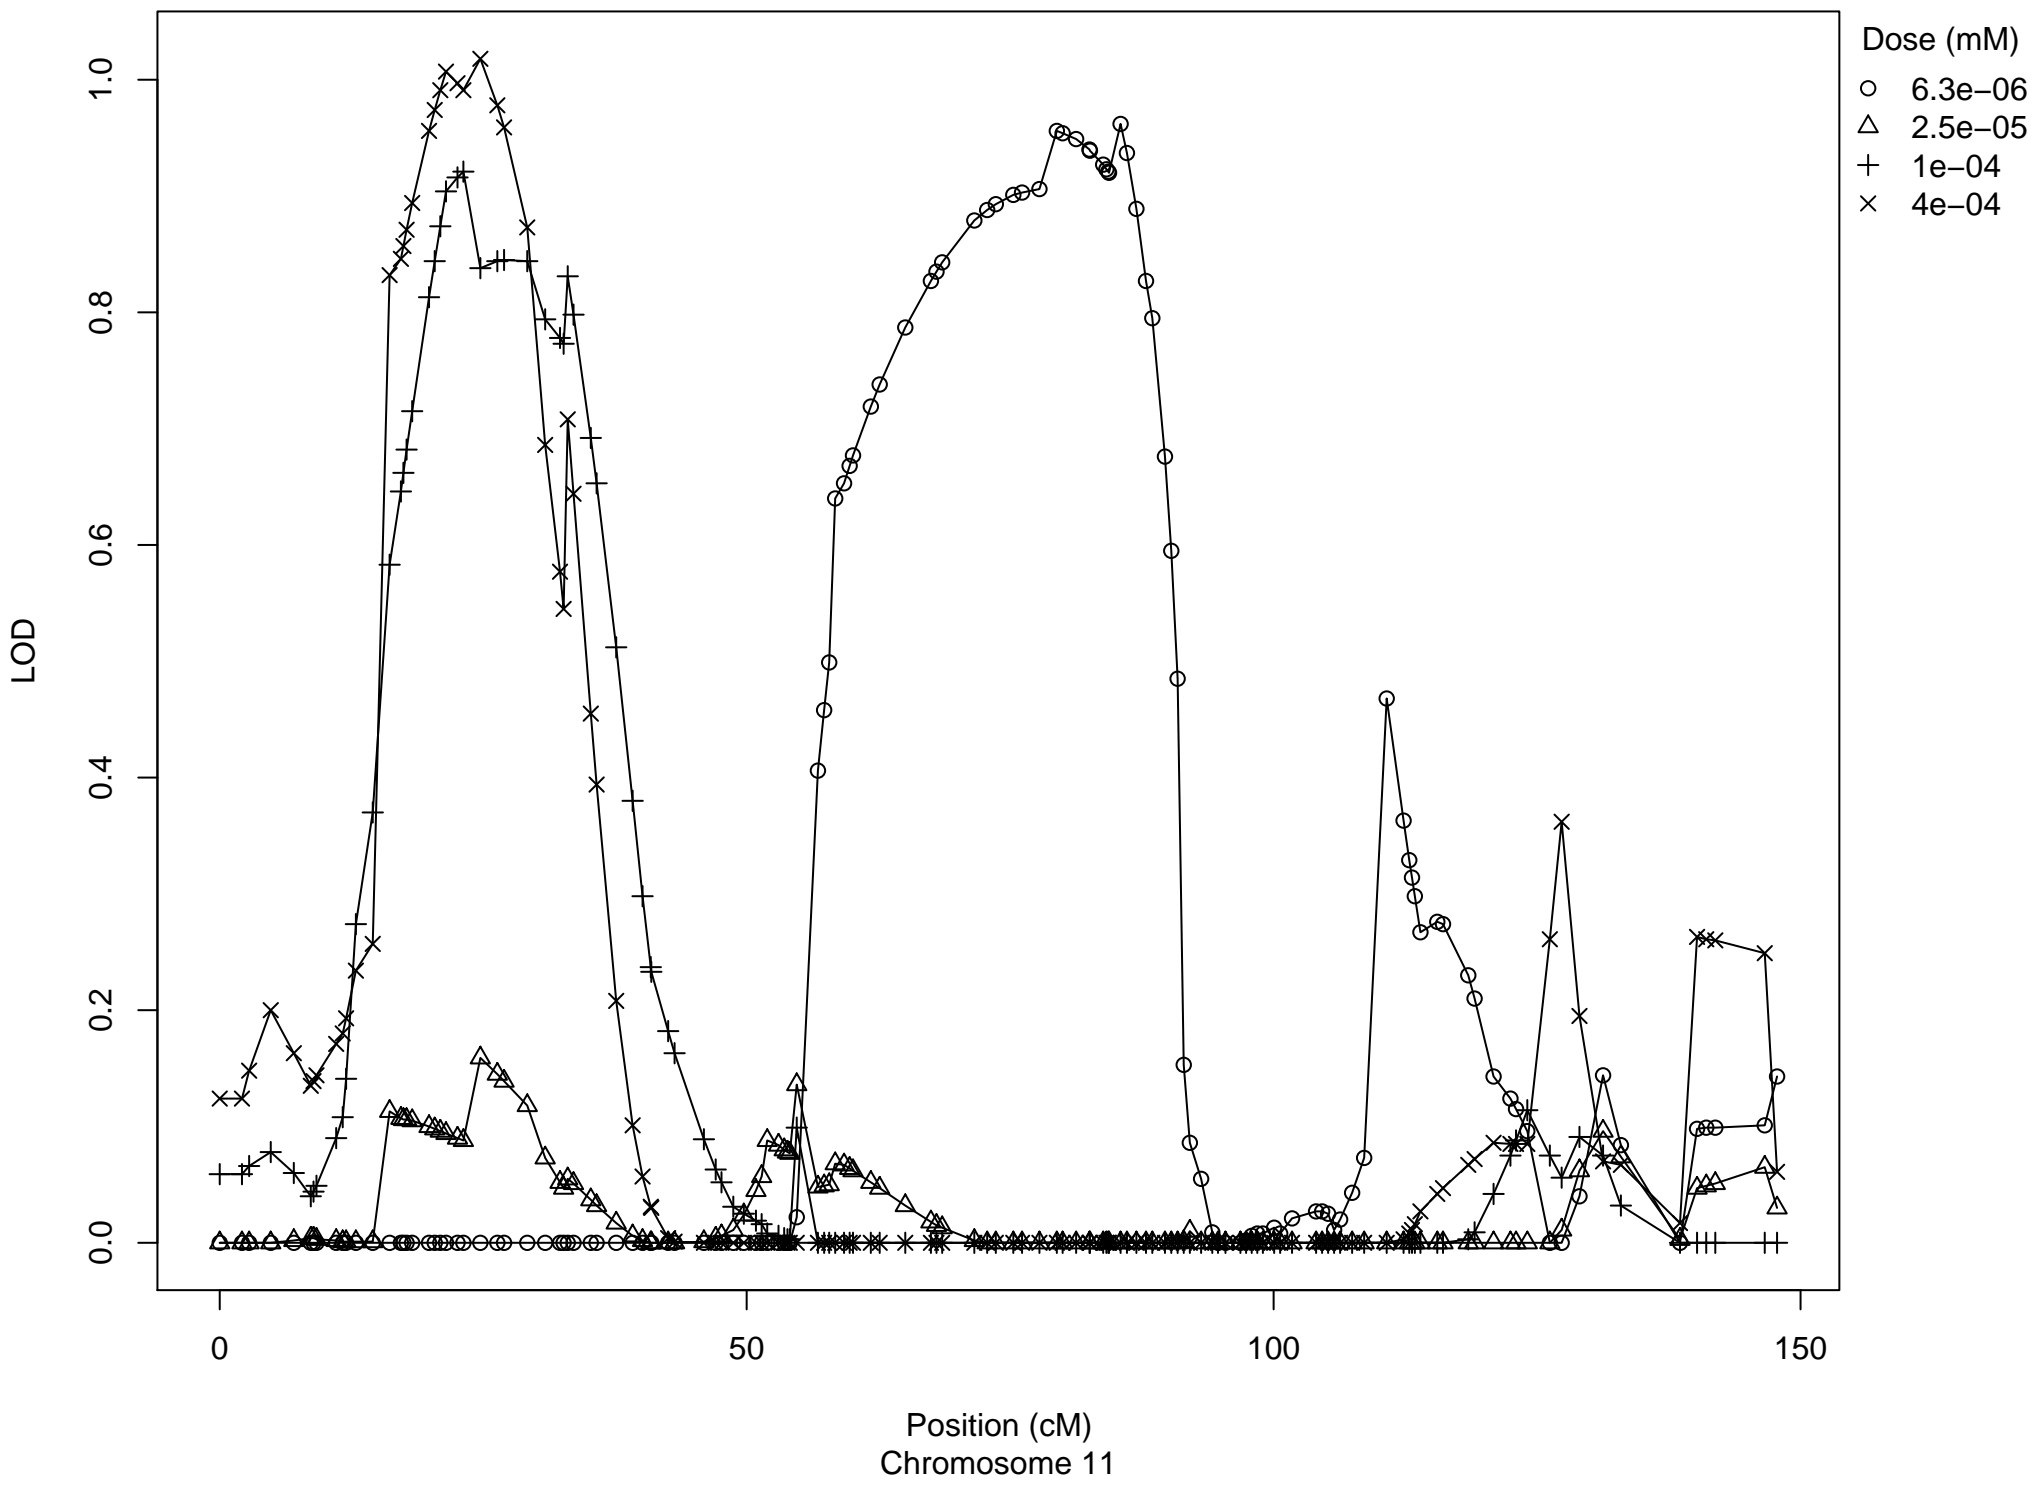

# Epirubicin hydrochloride (Epi)

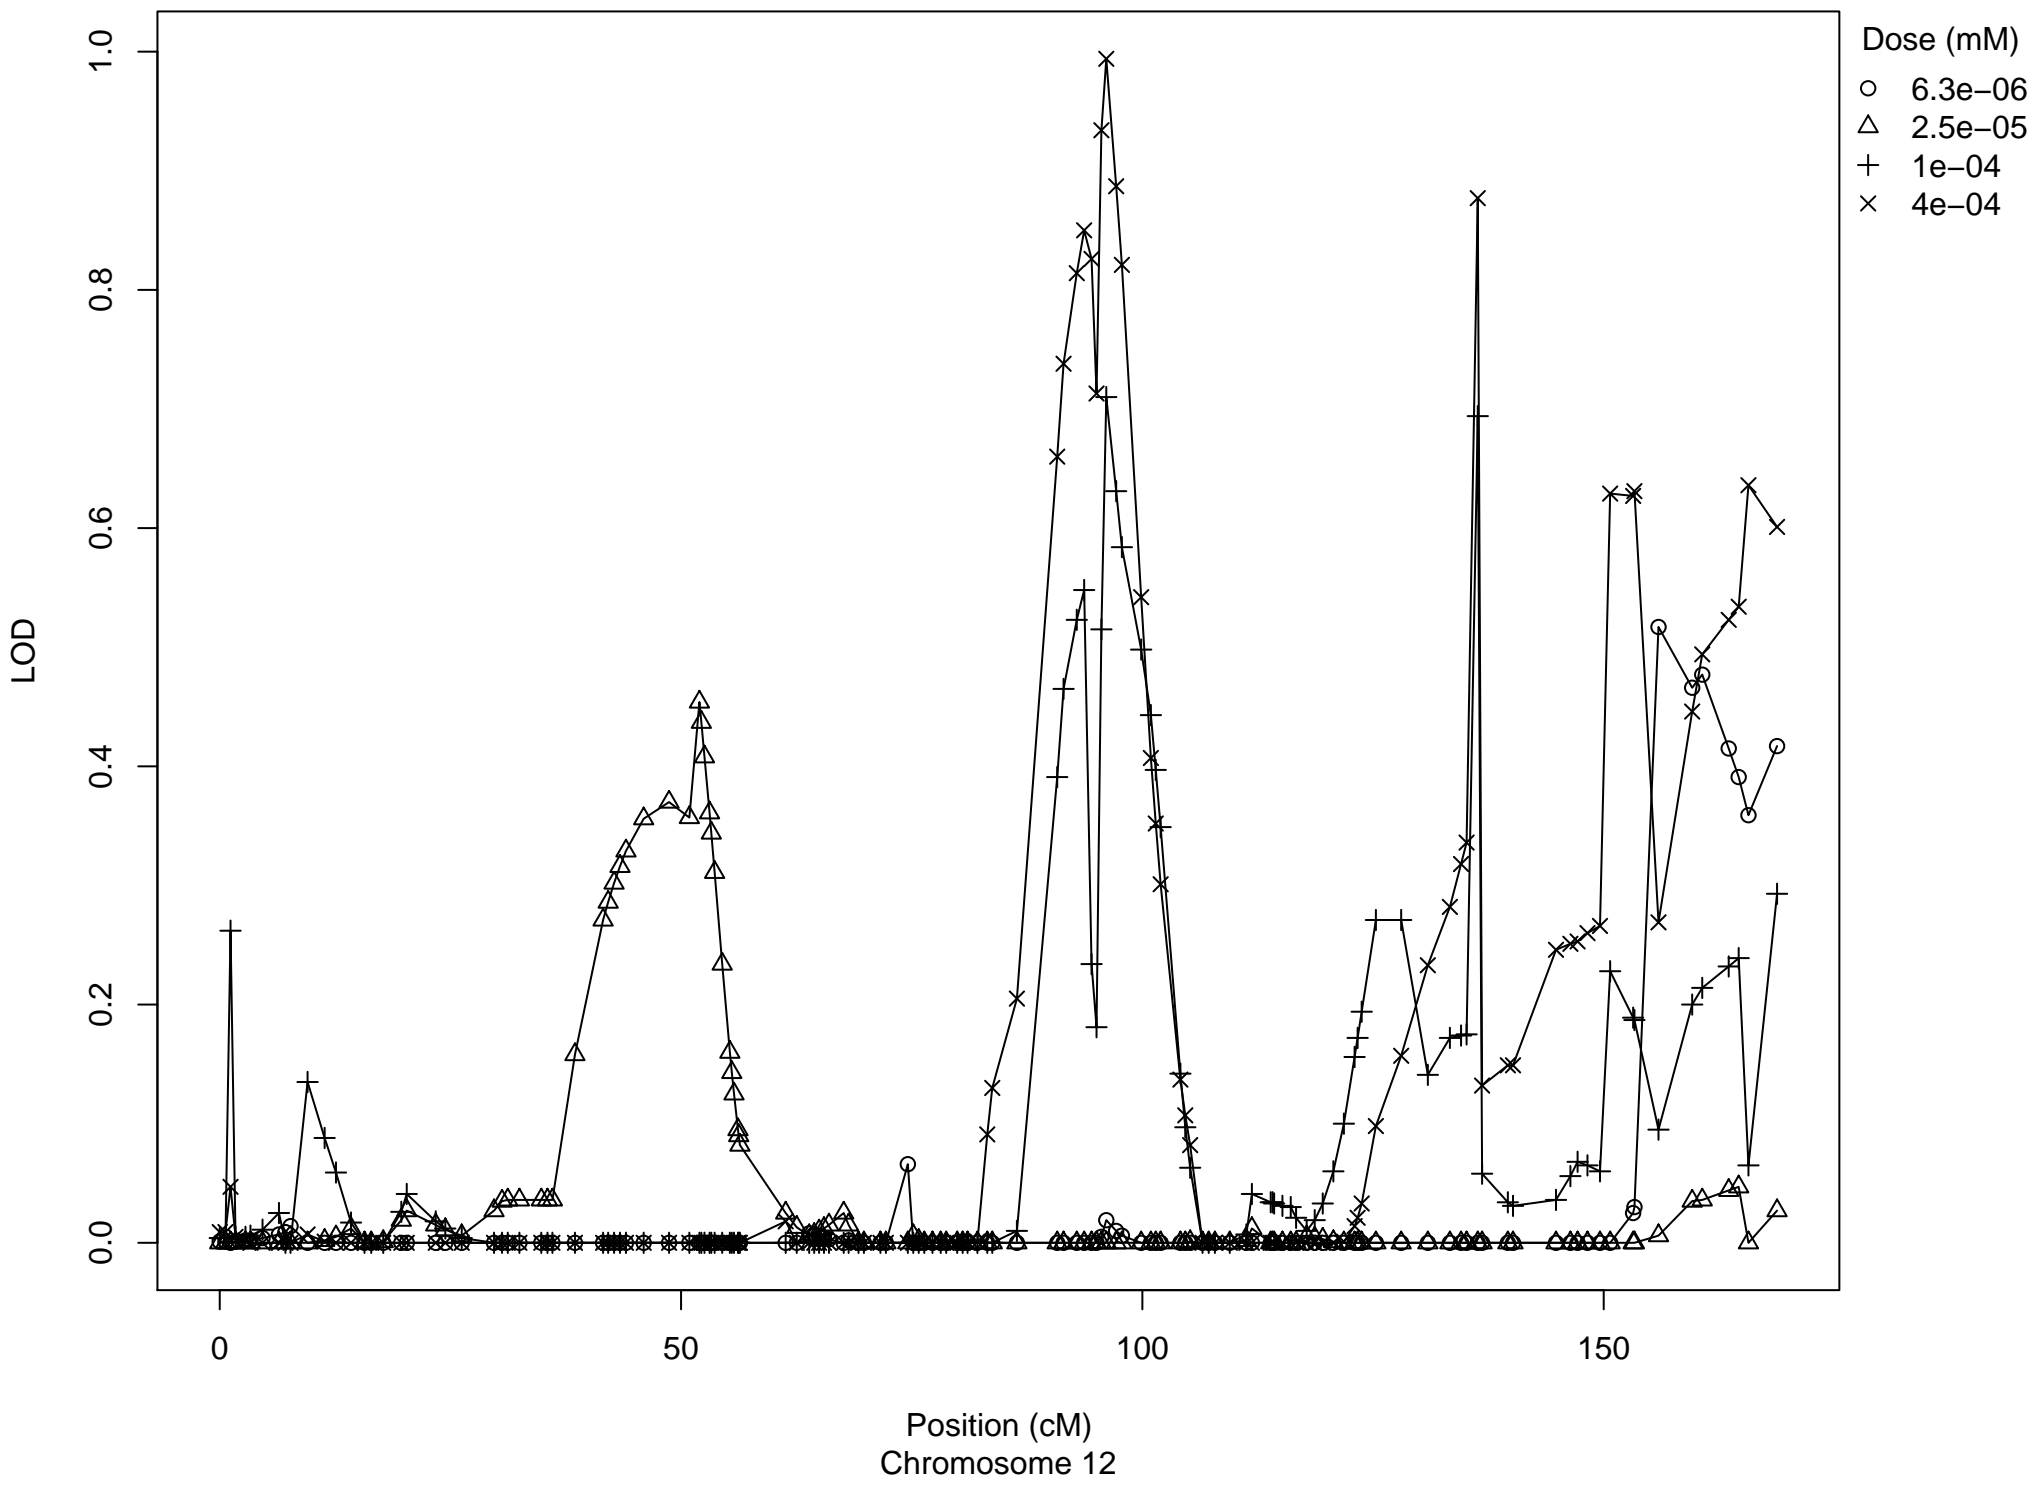

# Epirubicin hydrochloride (Epi)

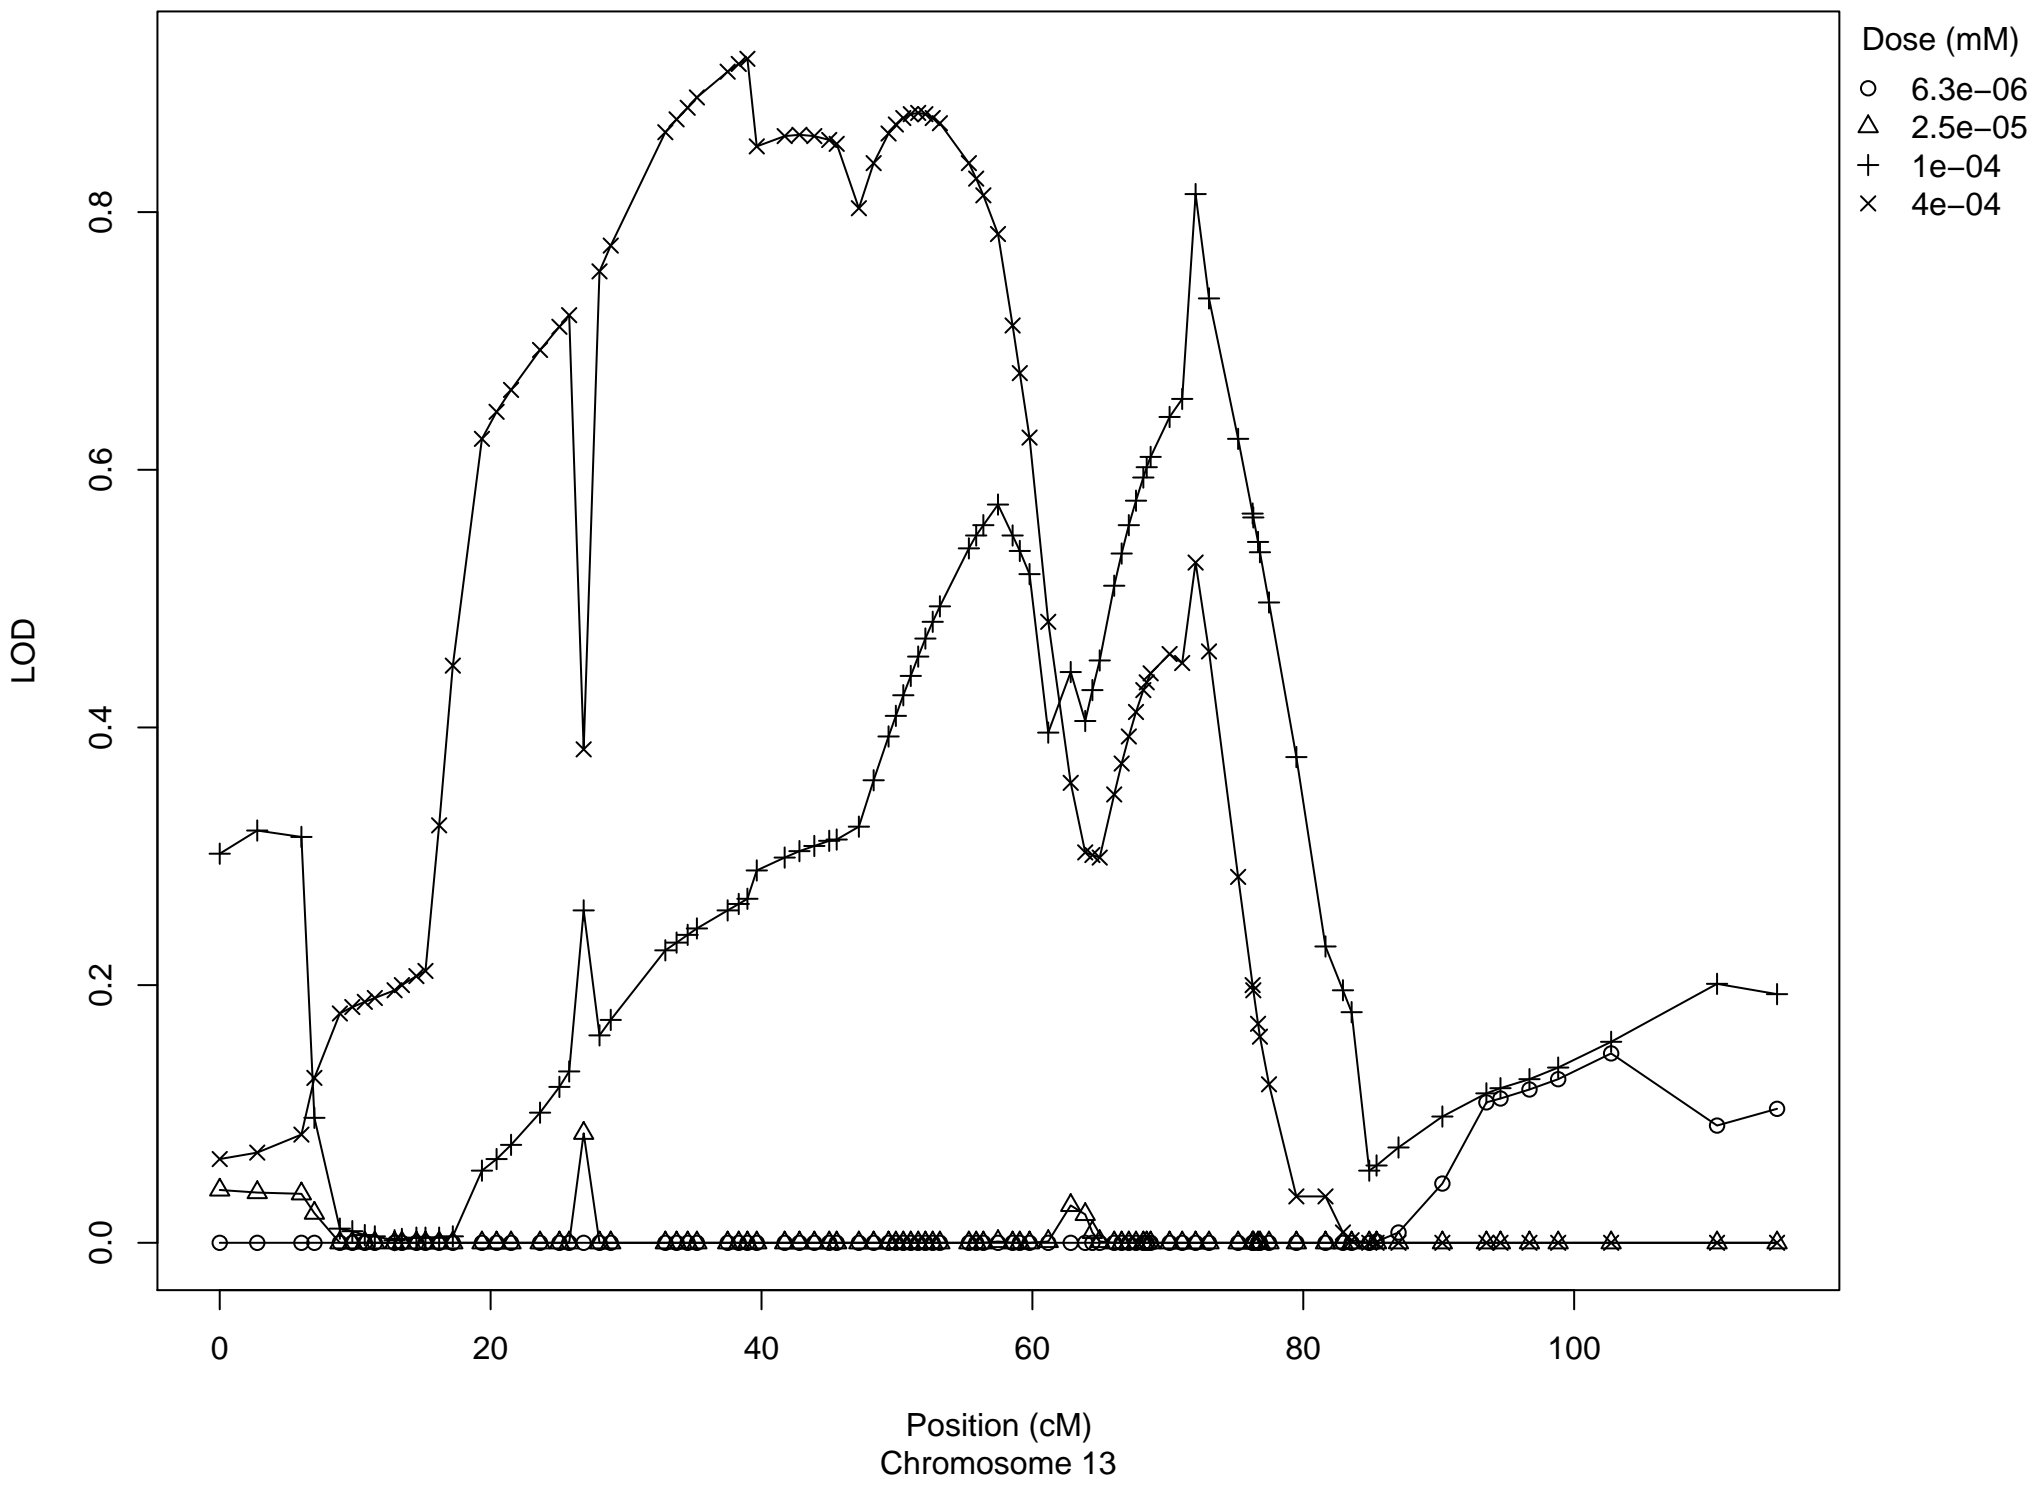

# Epirubicin hydrochloride (Epi)

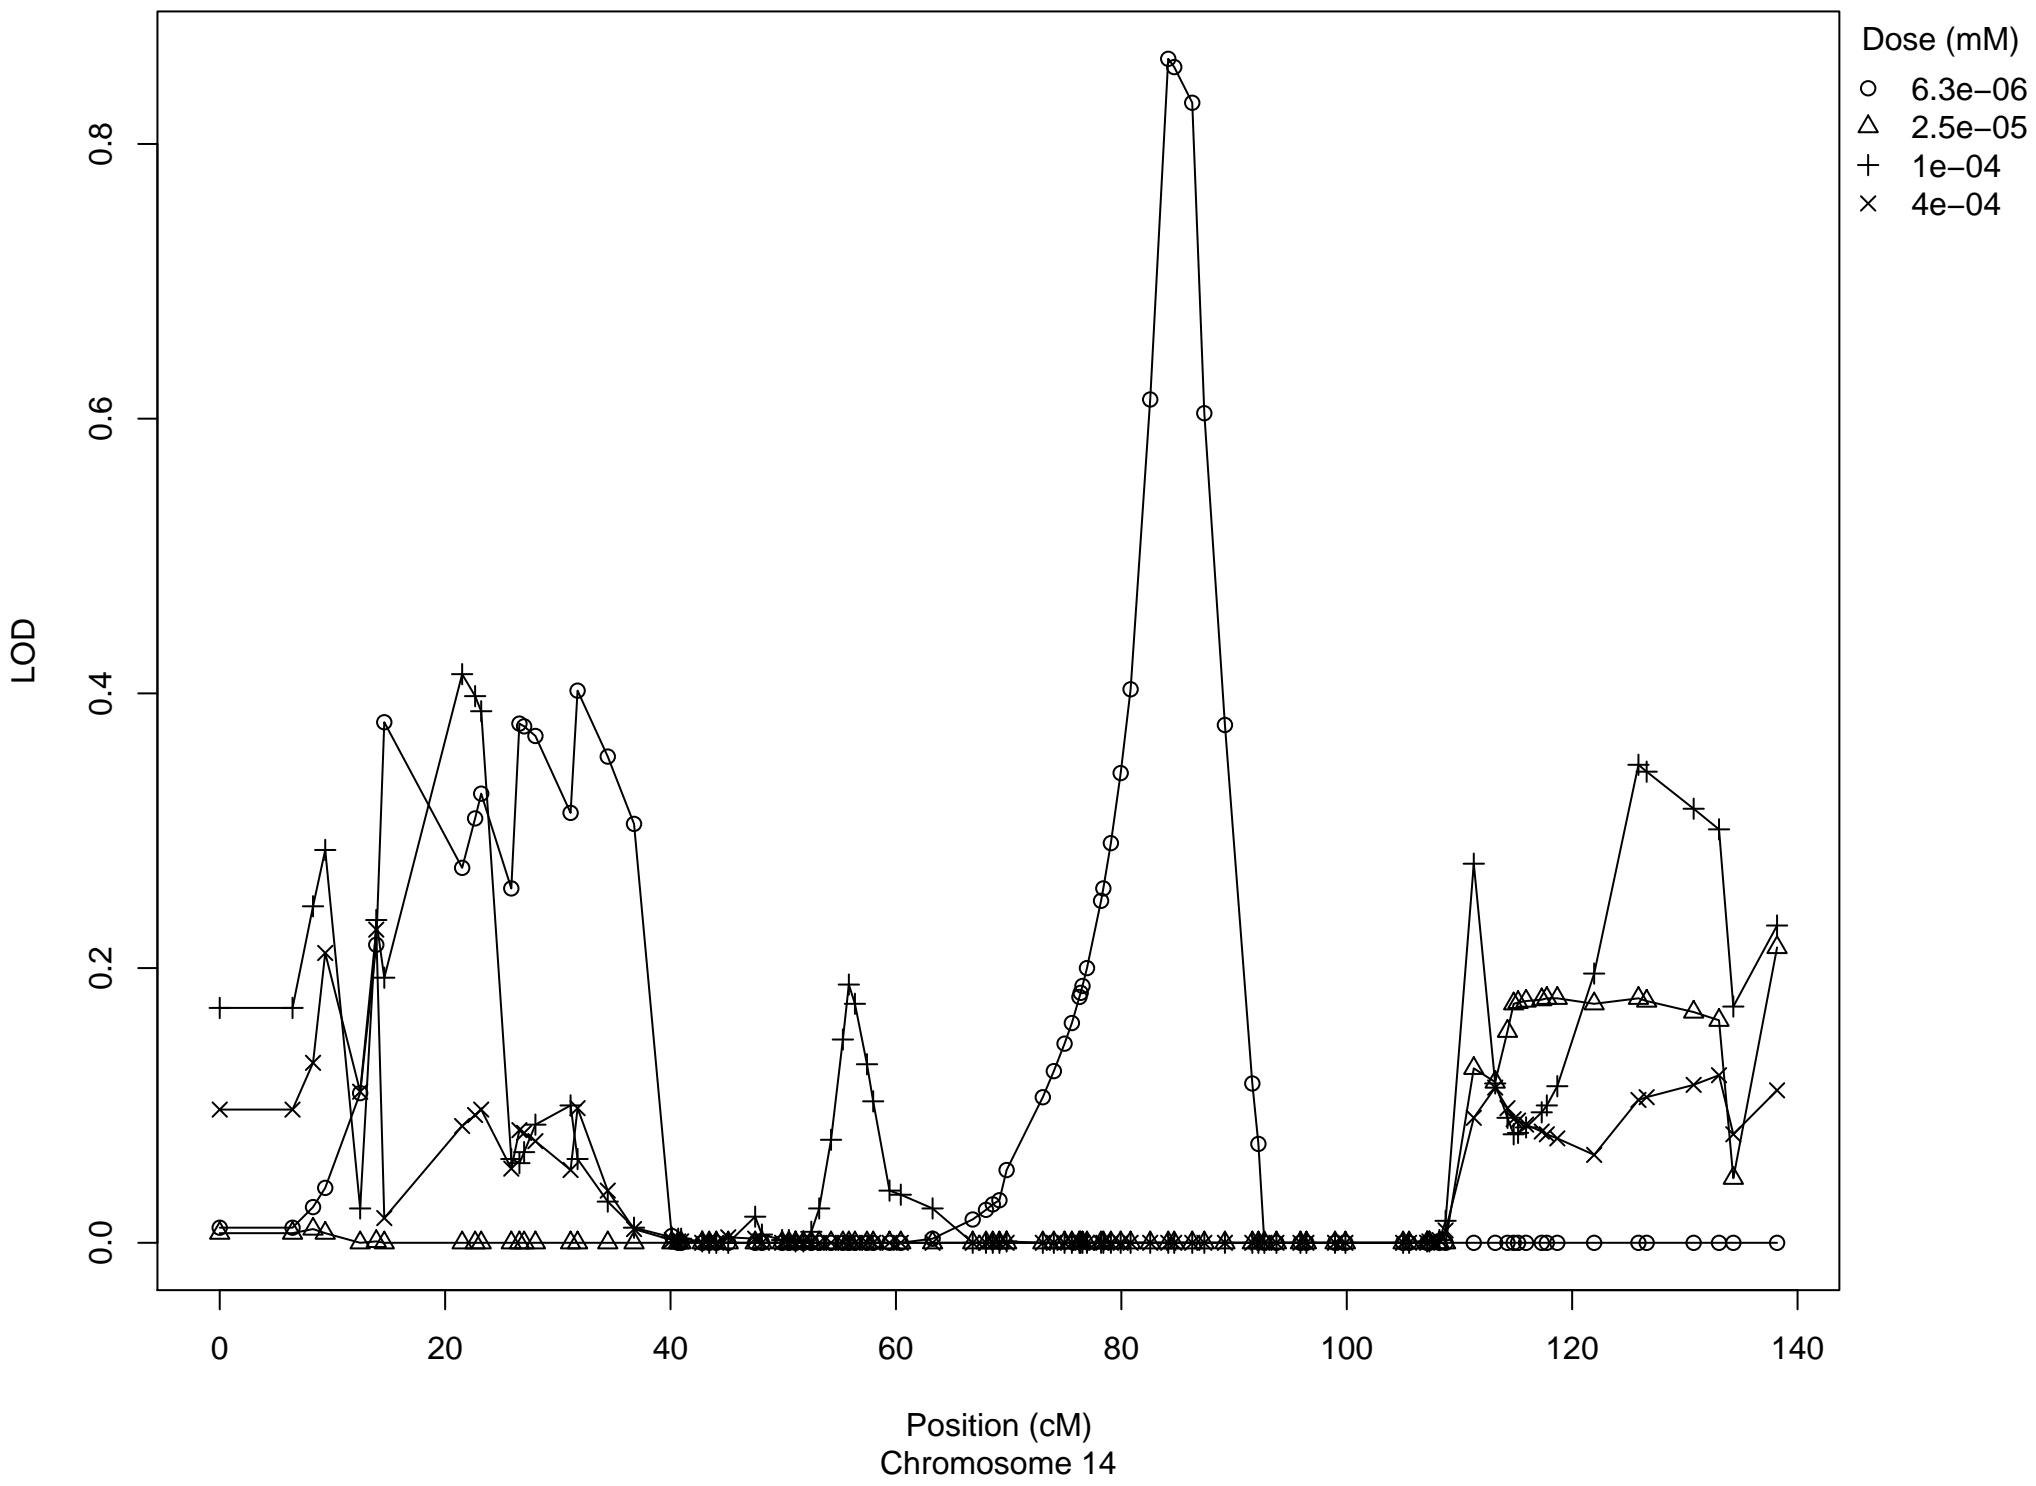

# Epirubicin hydrochloride (Epi)

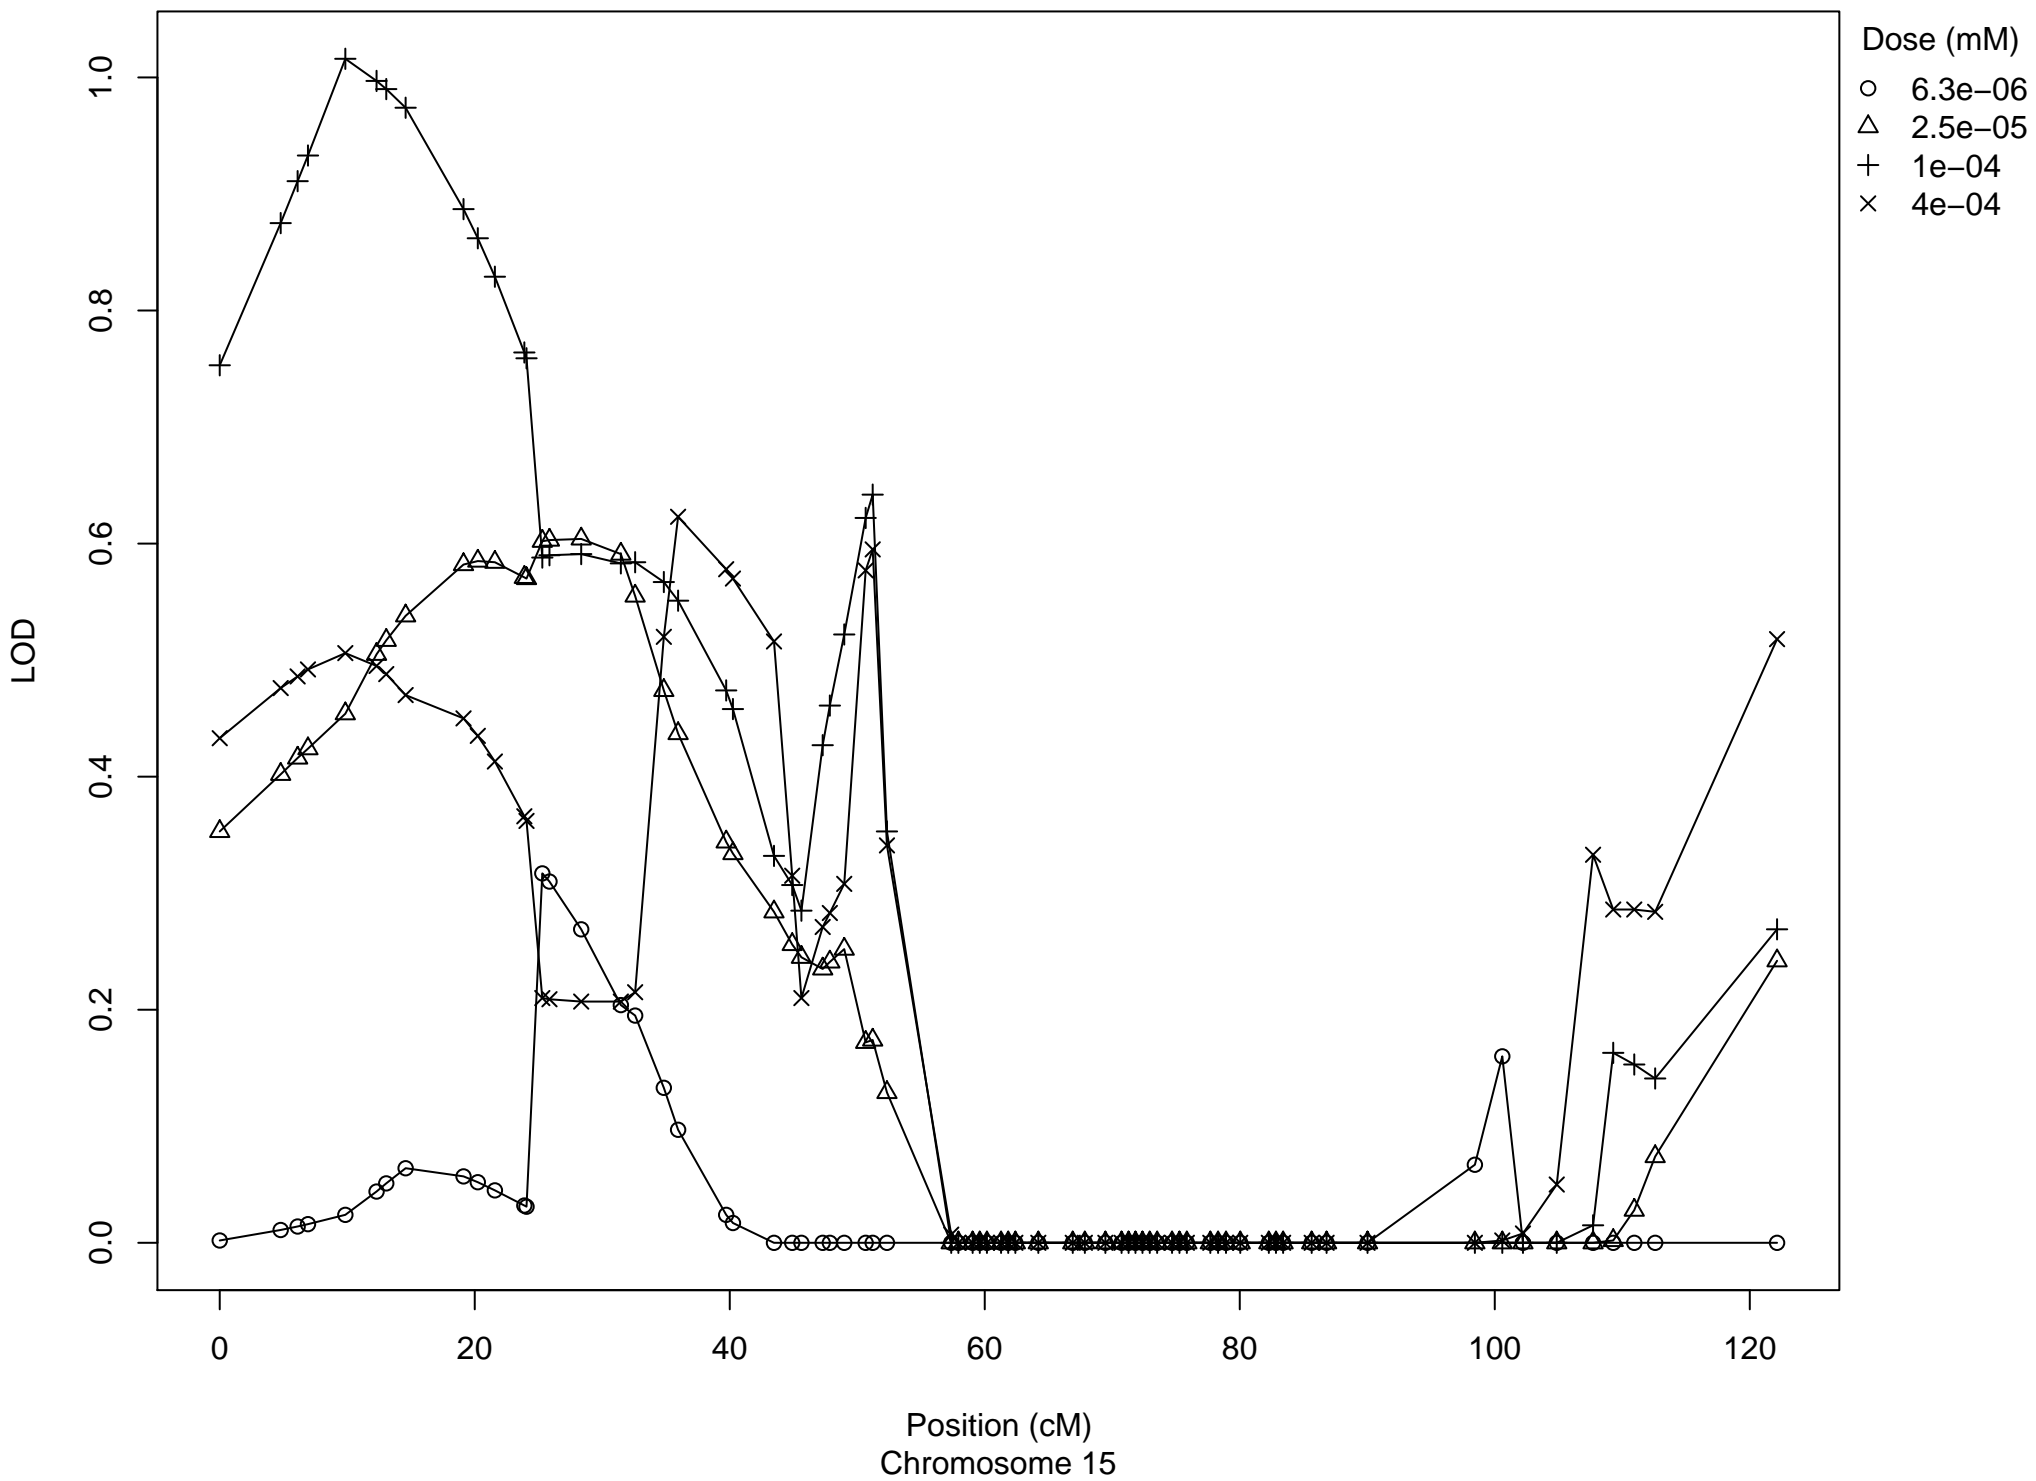

# Epirubicin hydrochloride (Epi)

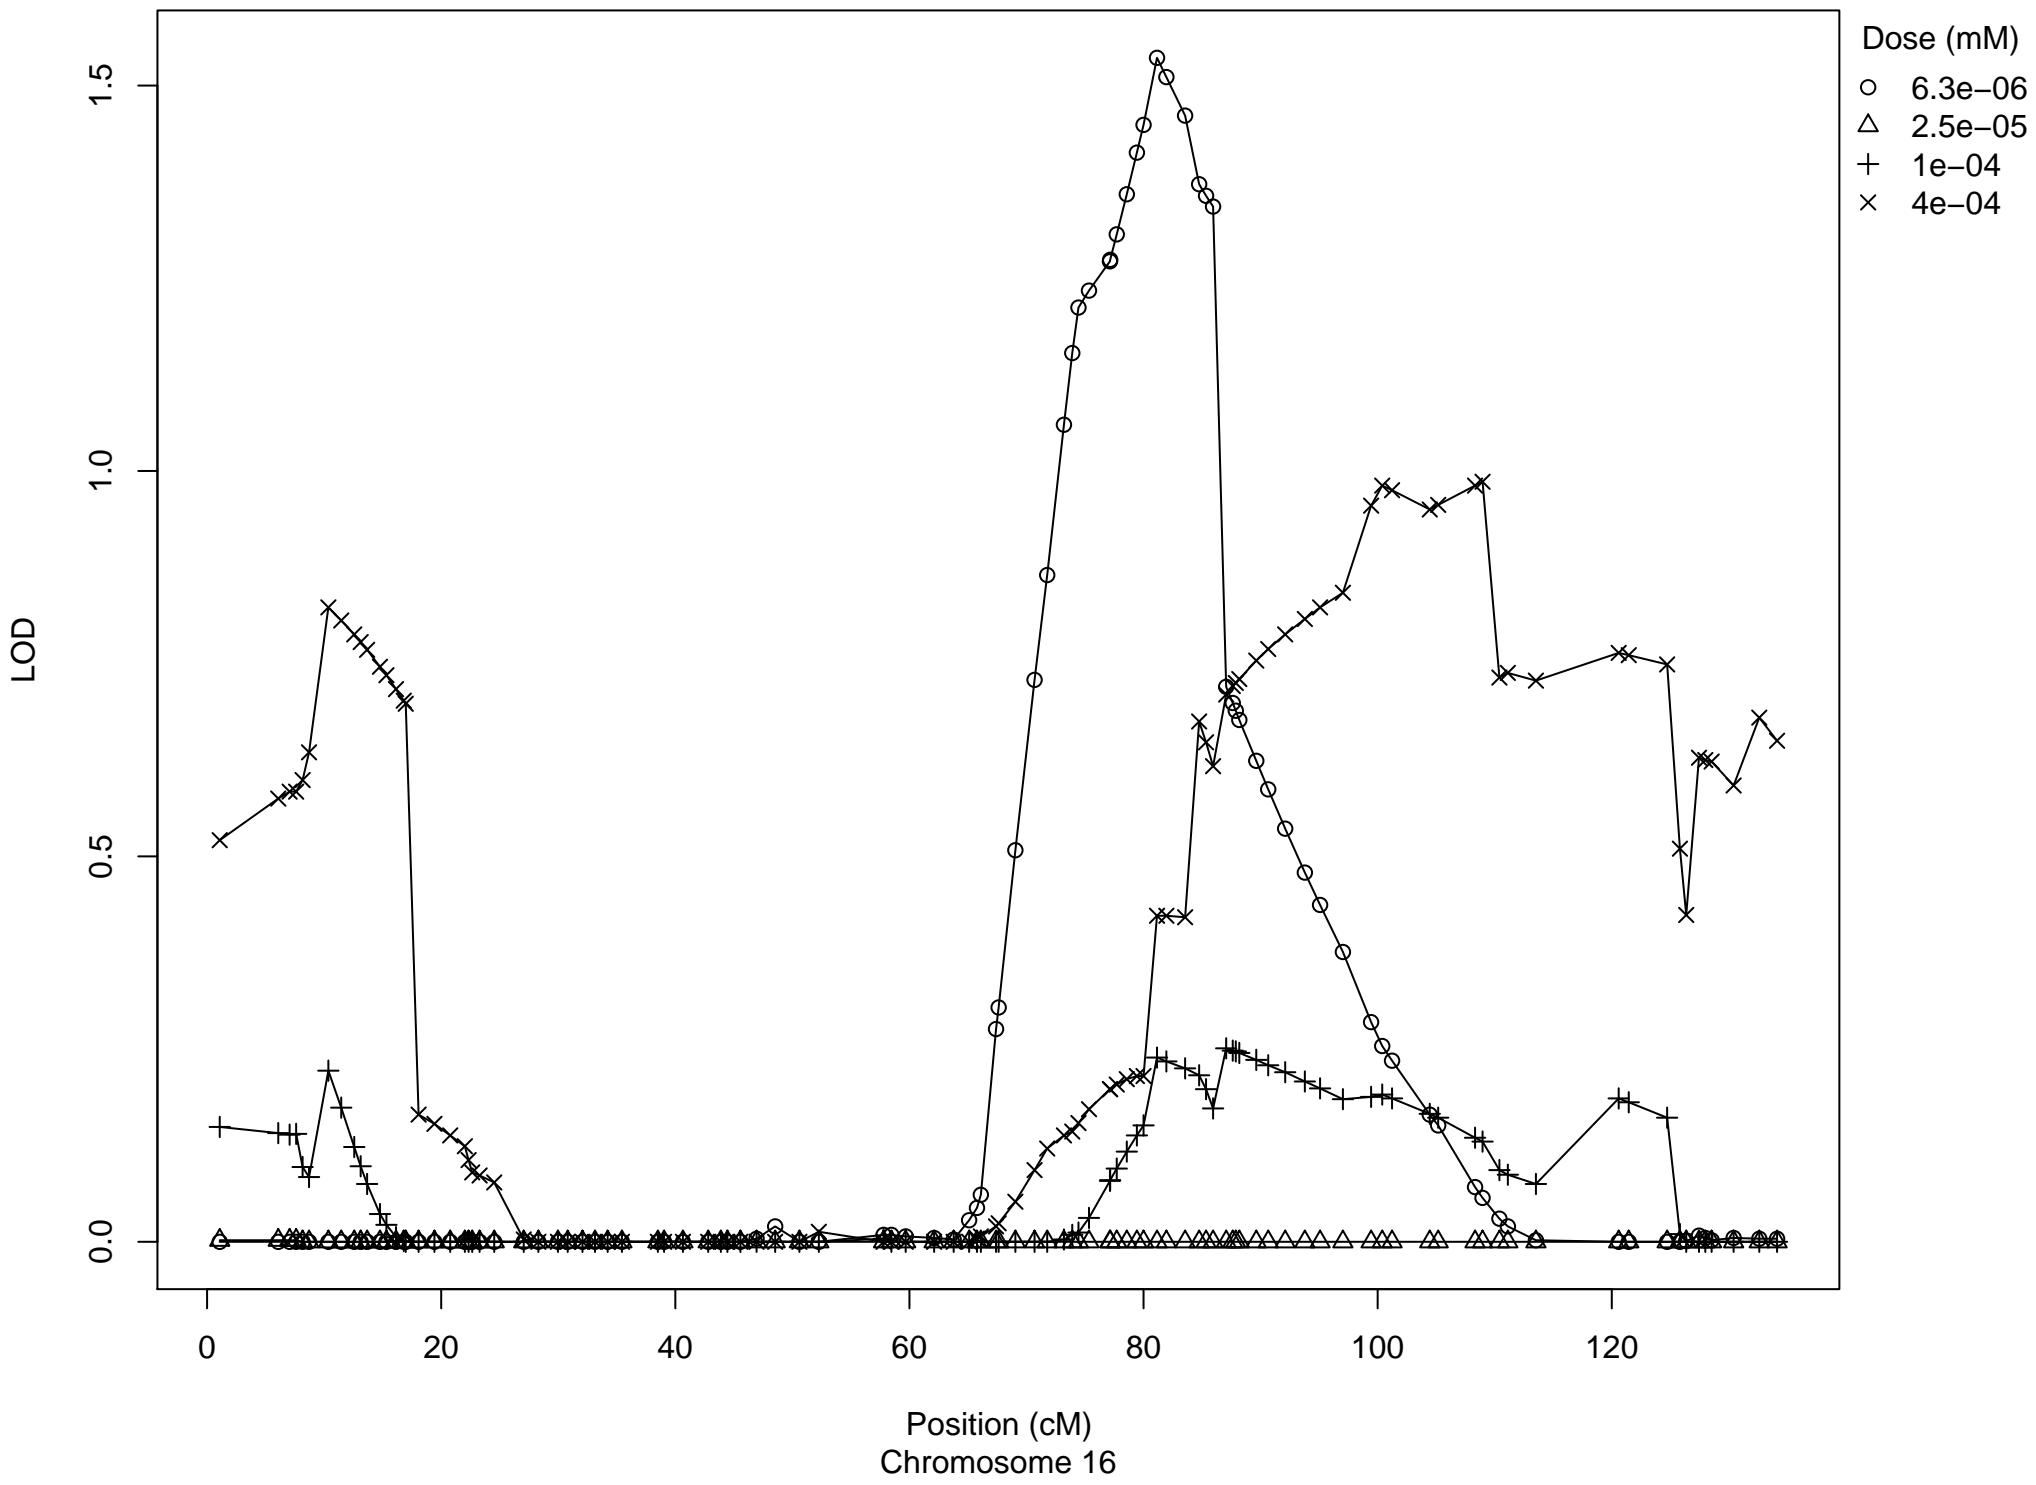

# Epirubicin hydrochloride (Epi)

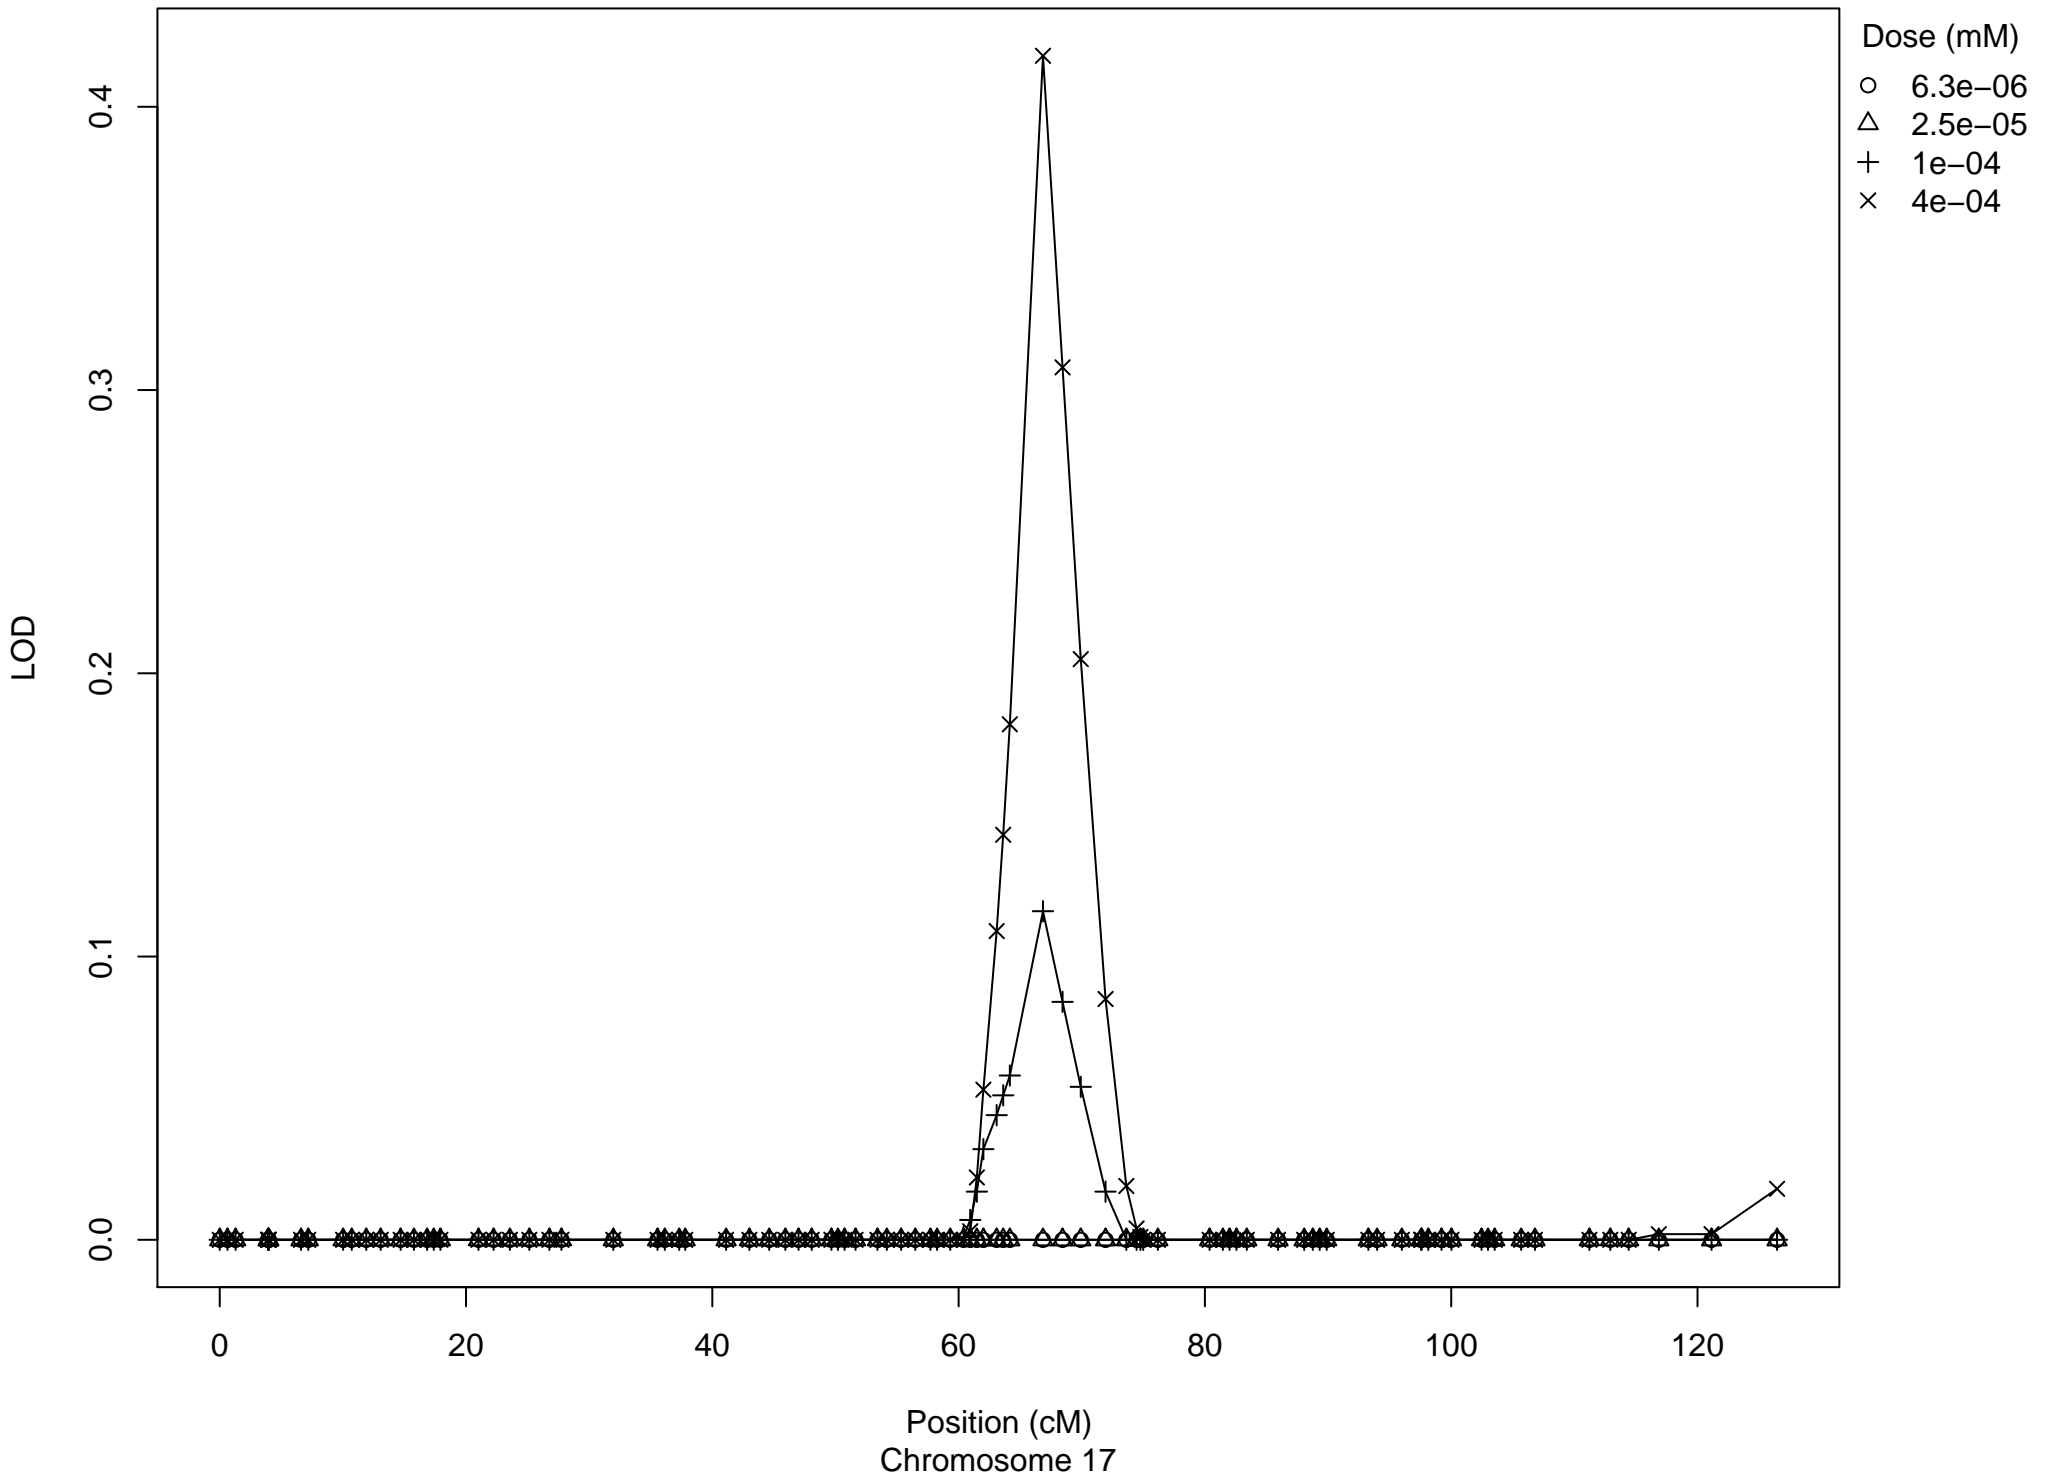

# Epirubicin hydrochloride (Epi)

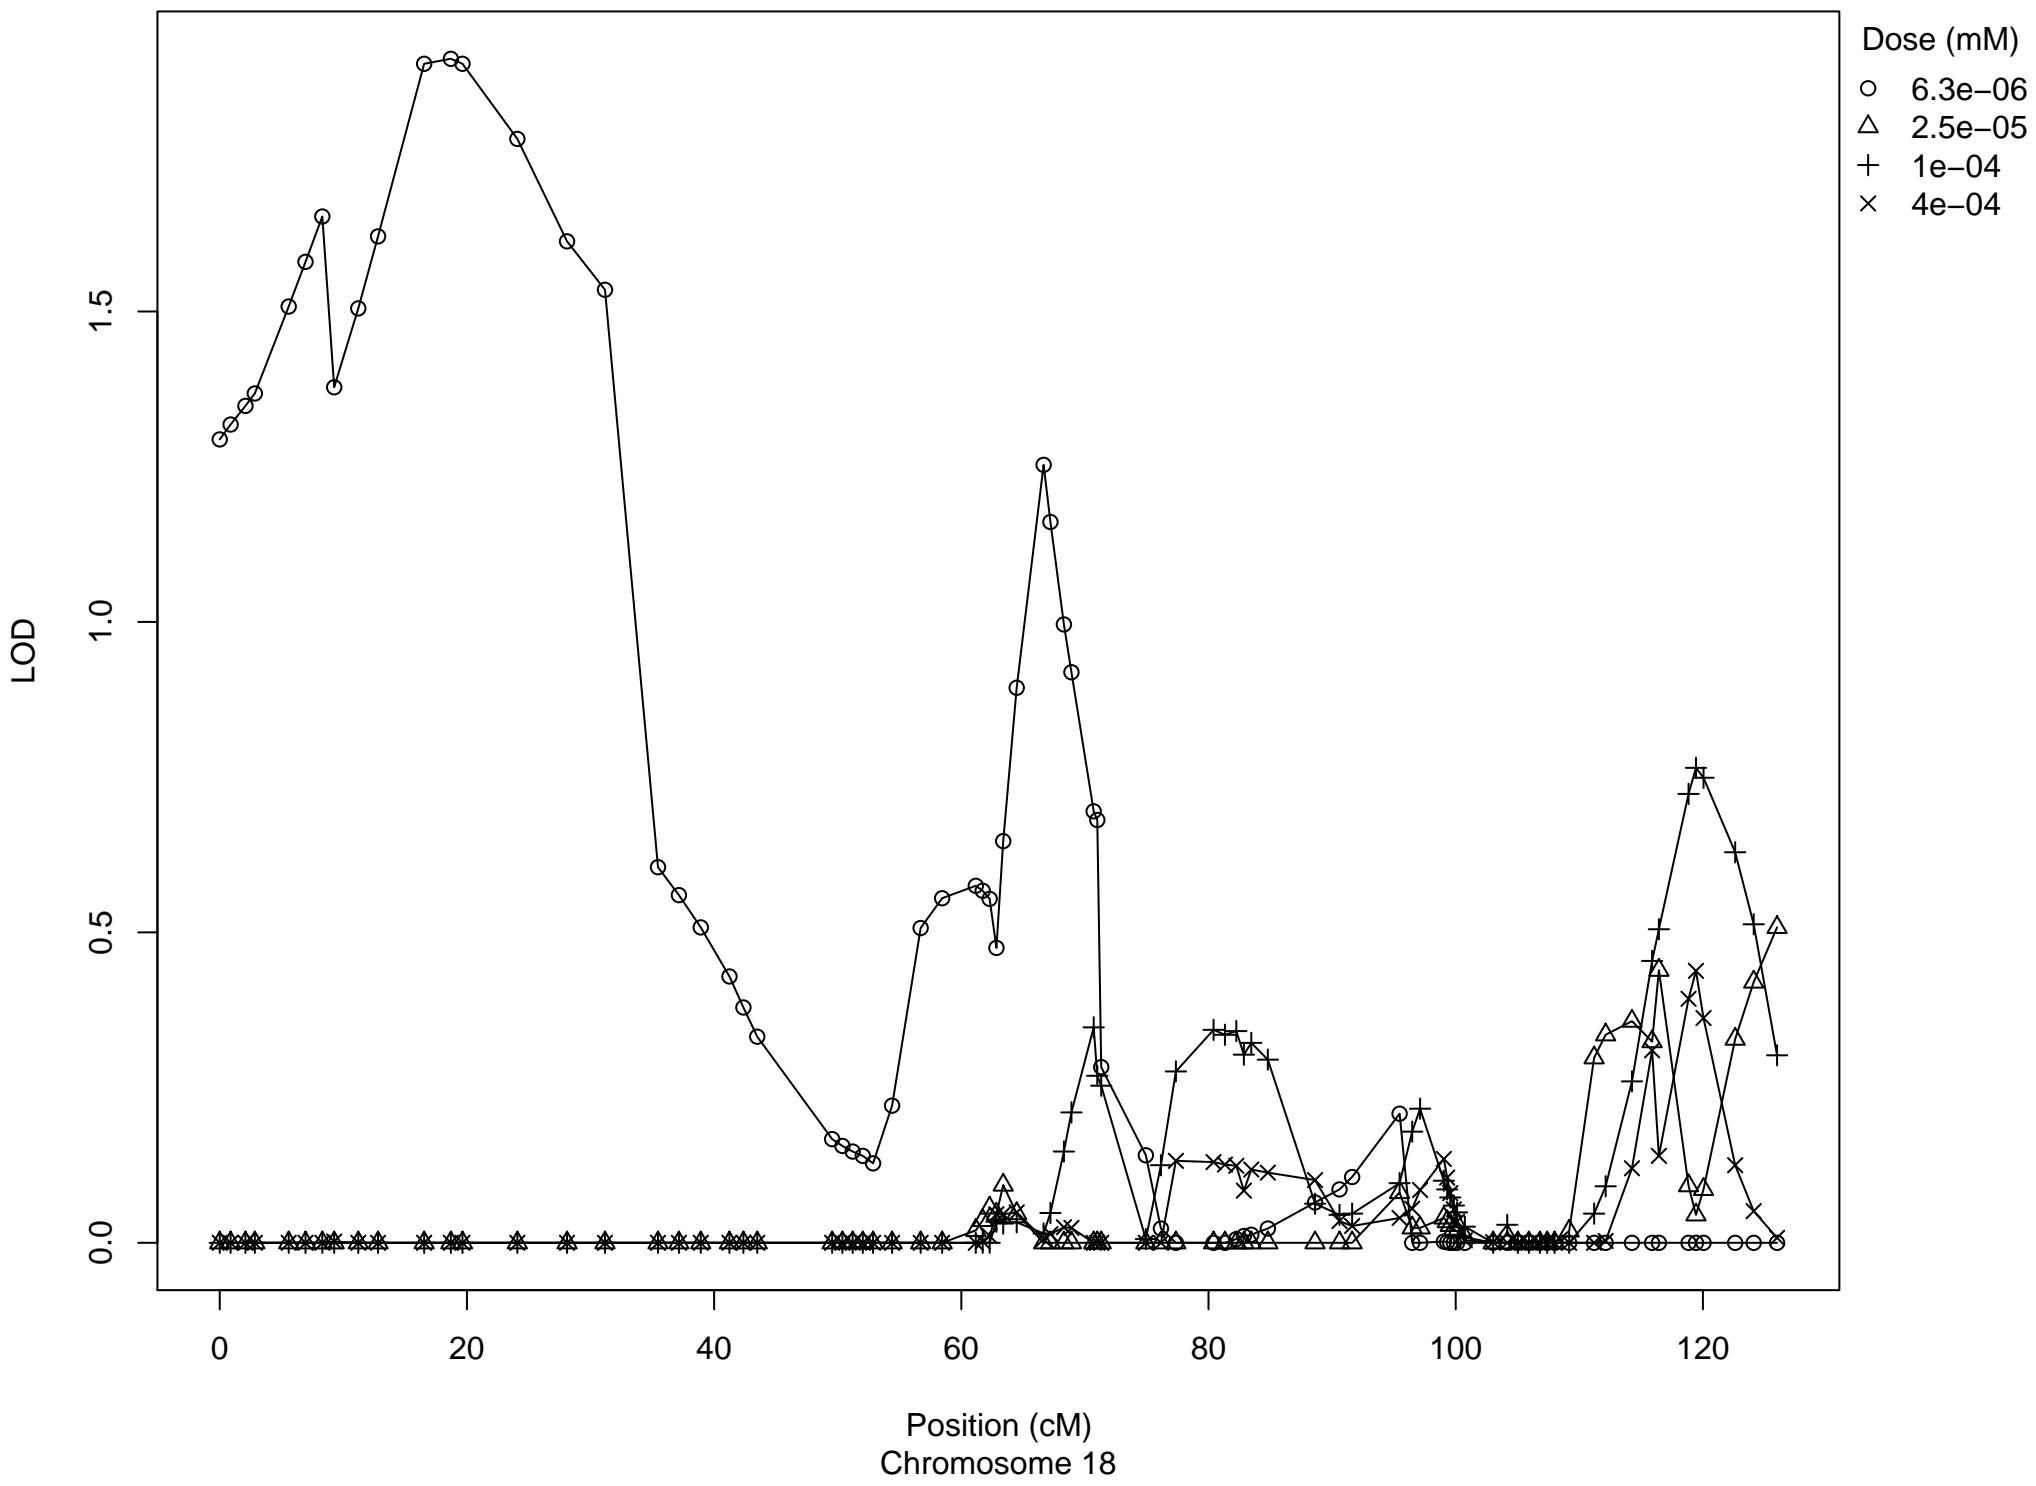



# Epirubicin hydrochloride (Epi)

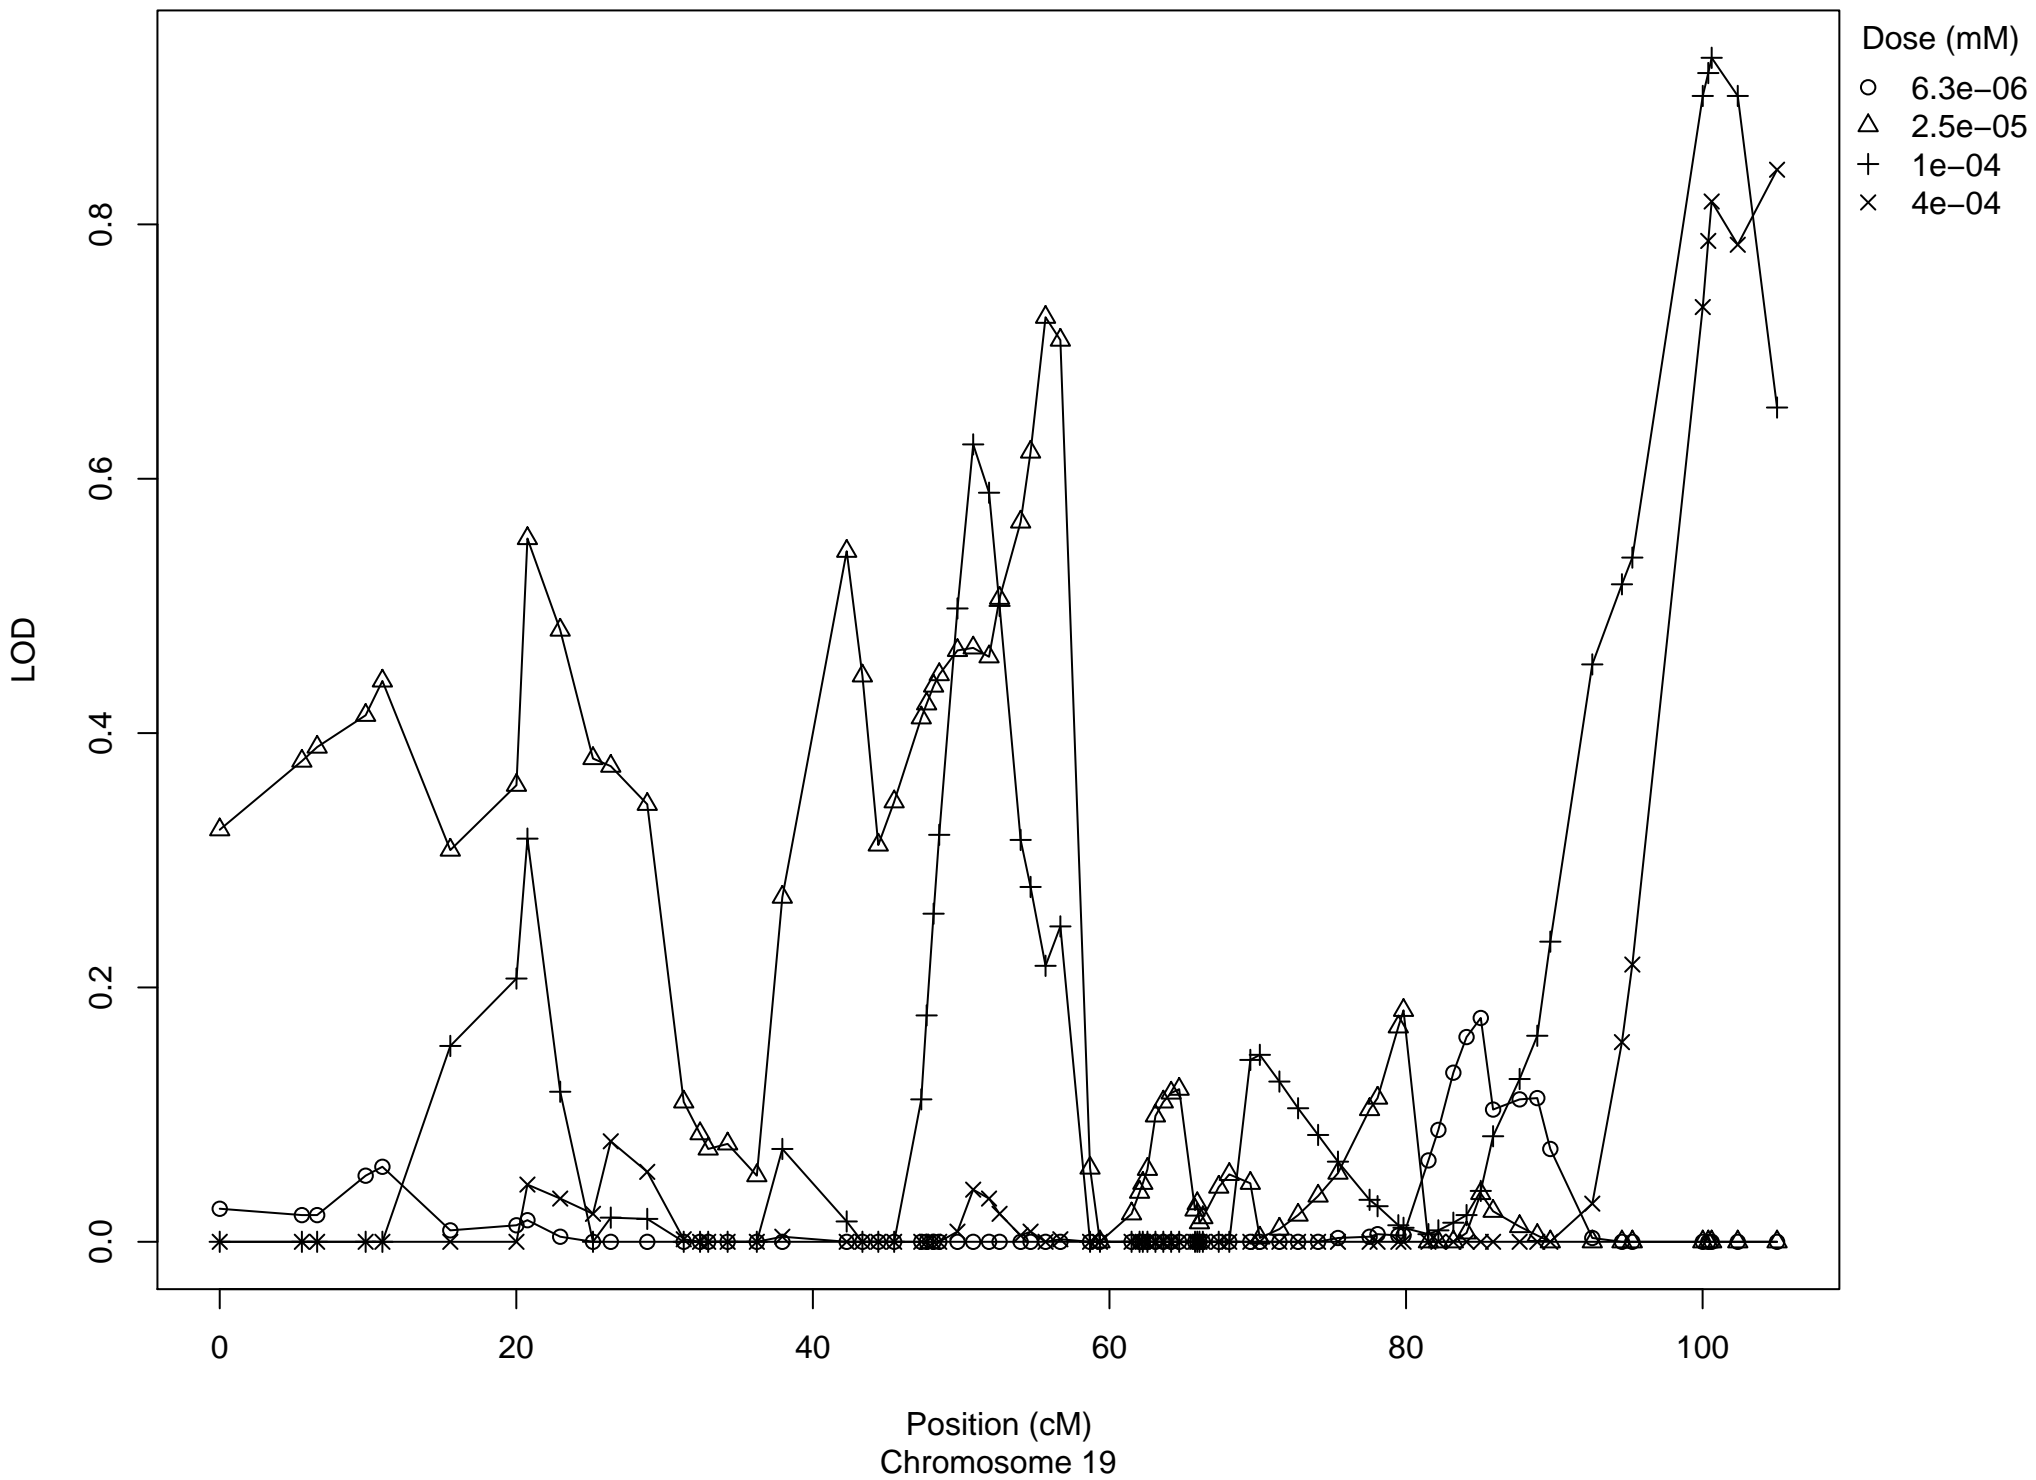

# Epirubicin hydrochloride (Epi)

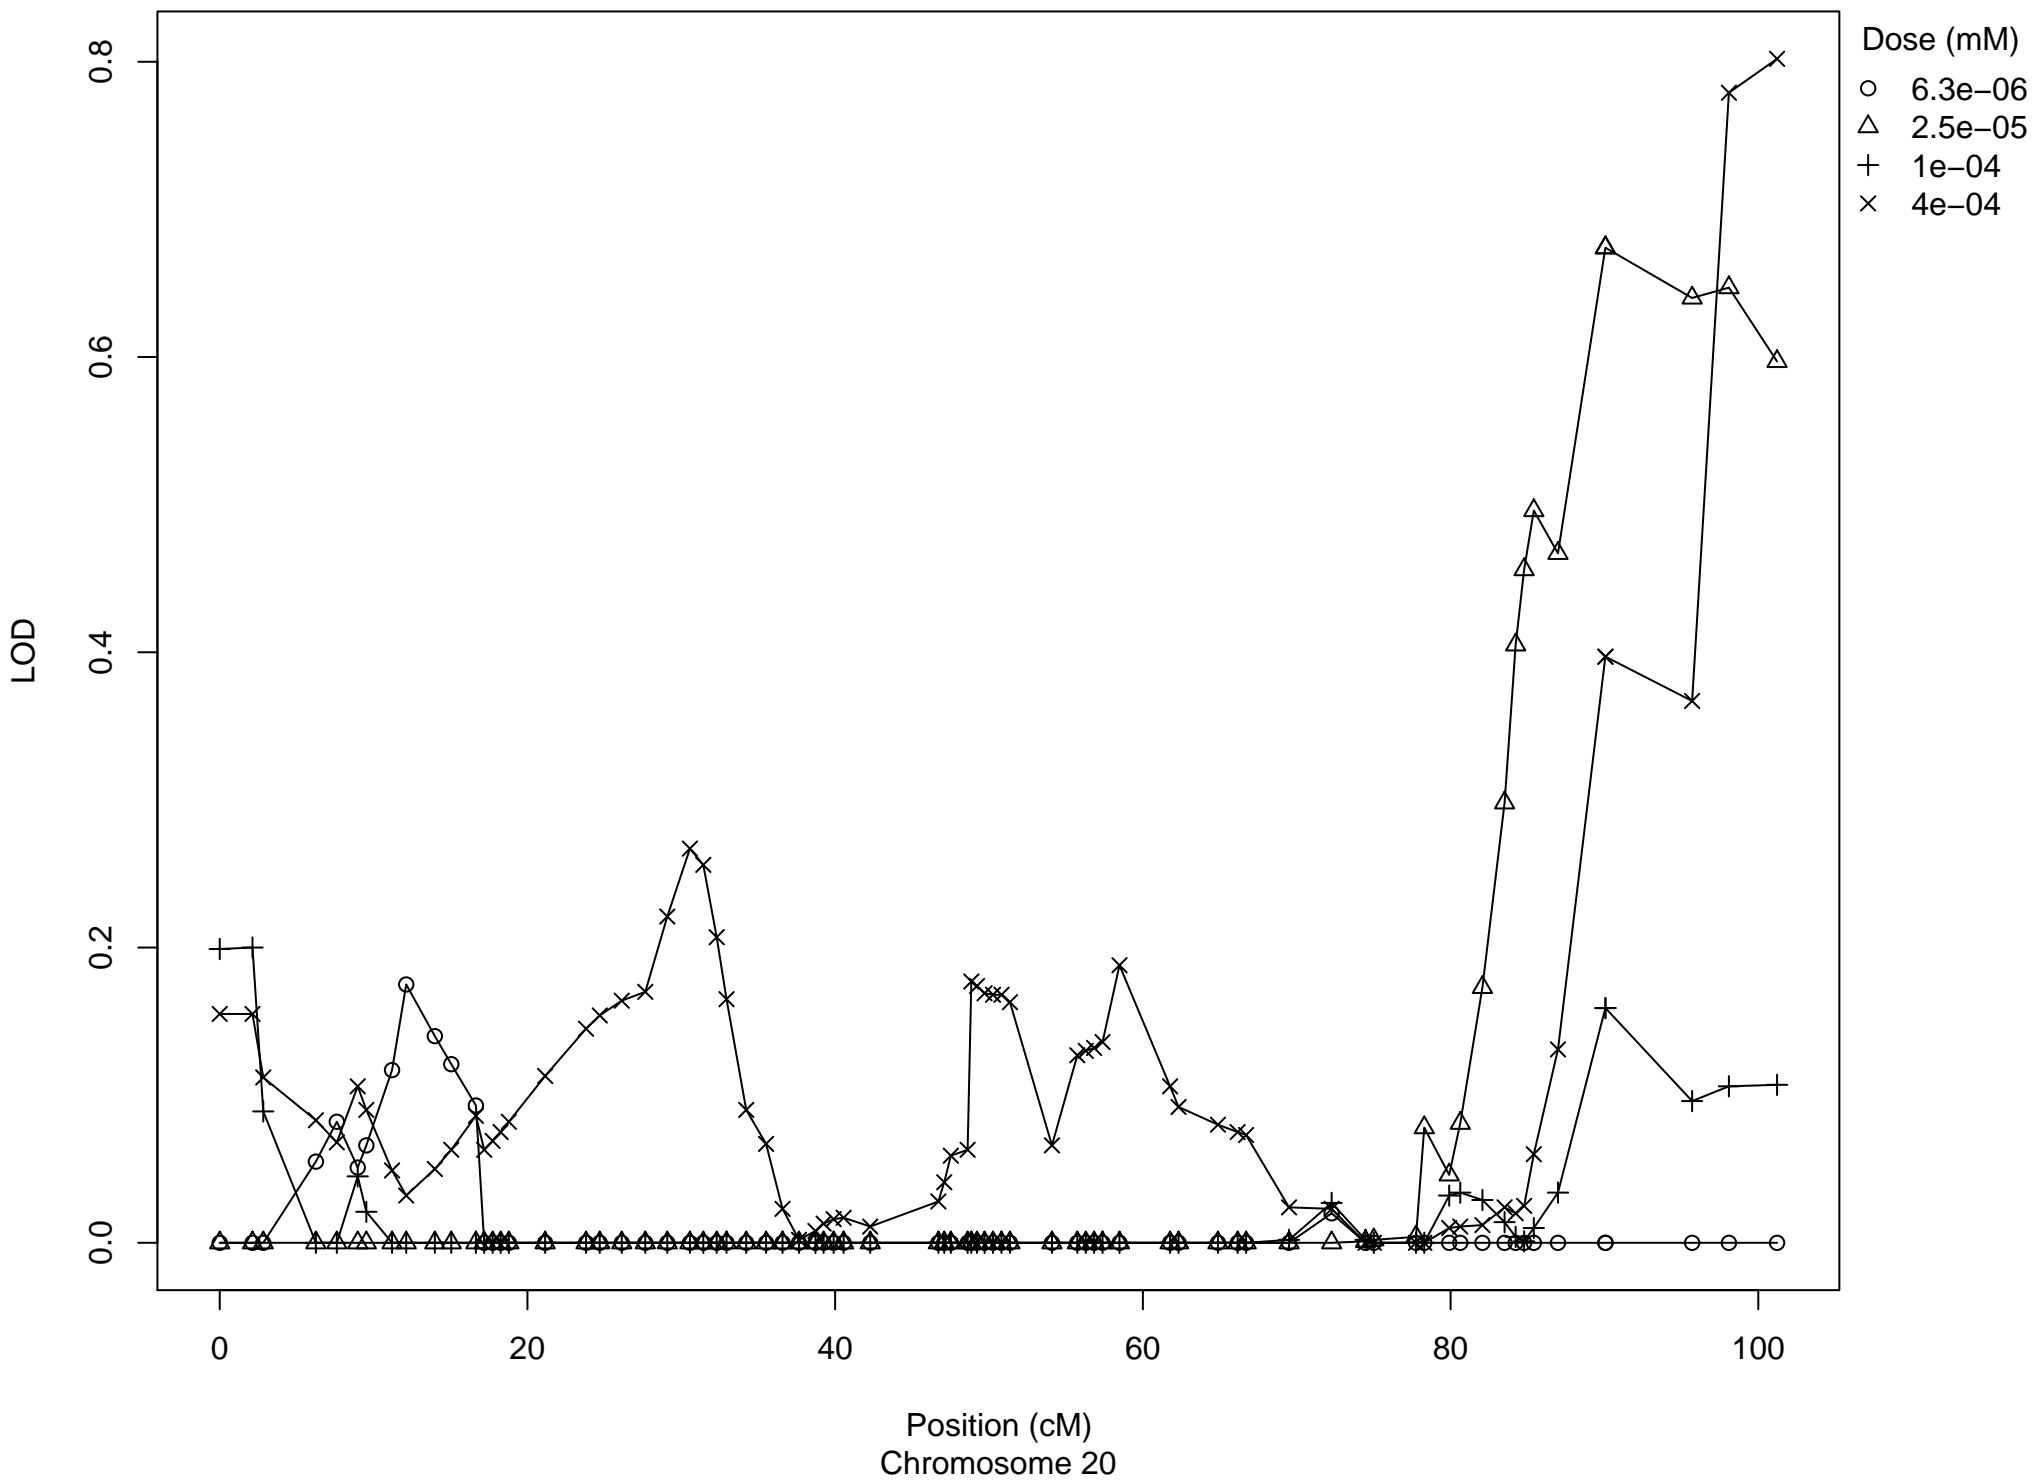

# Epirubicin hydrochloride (Epi)

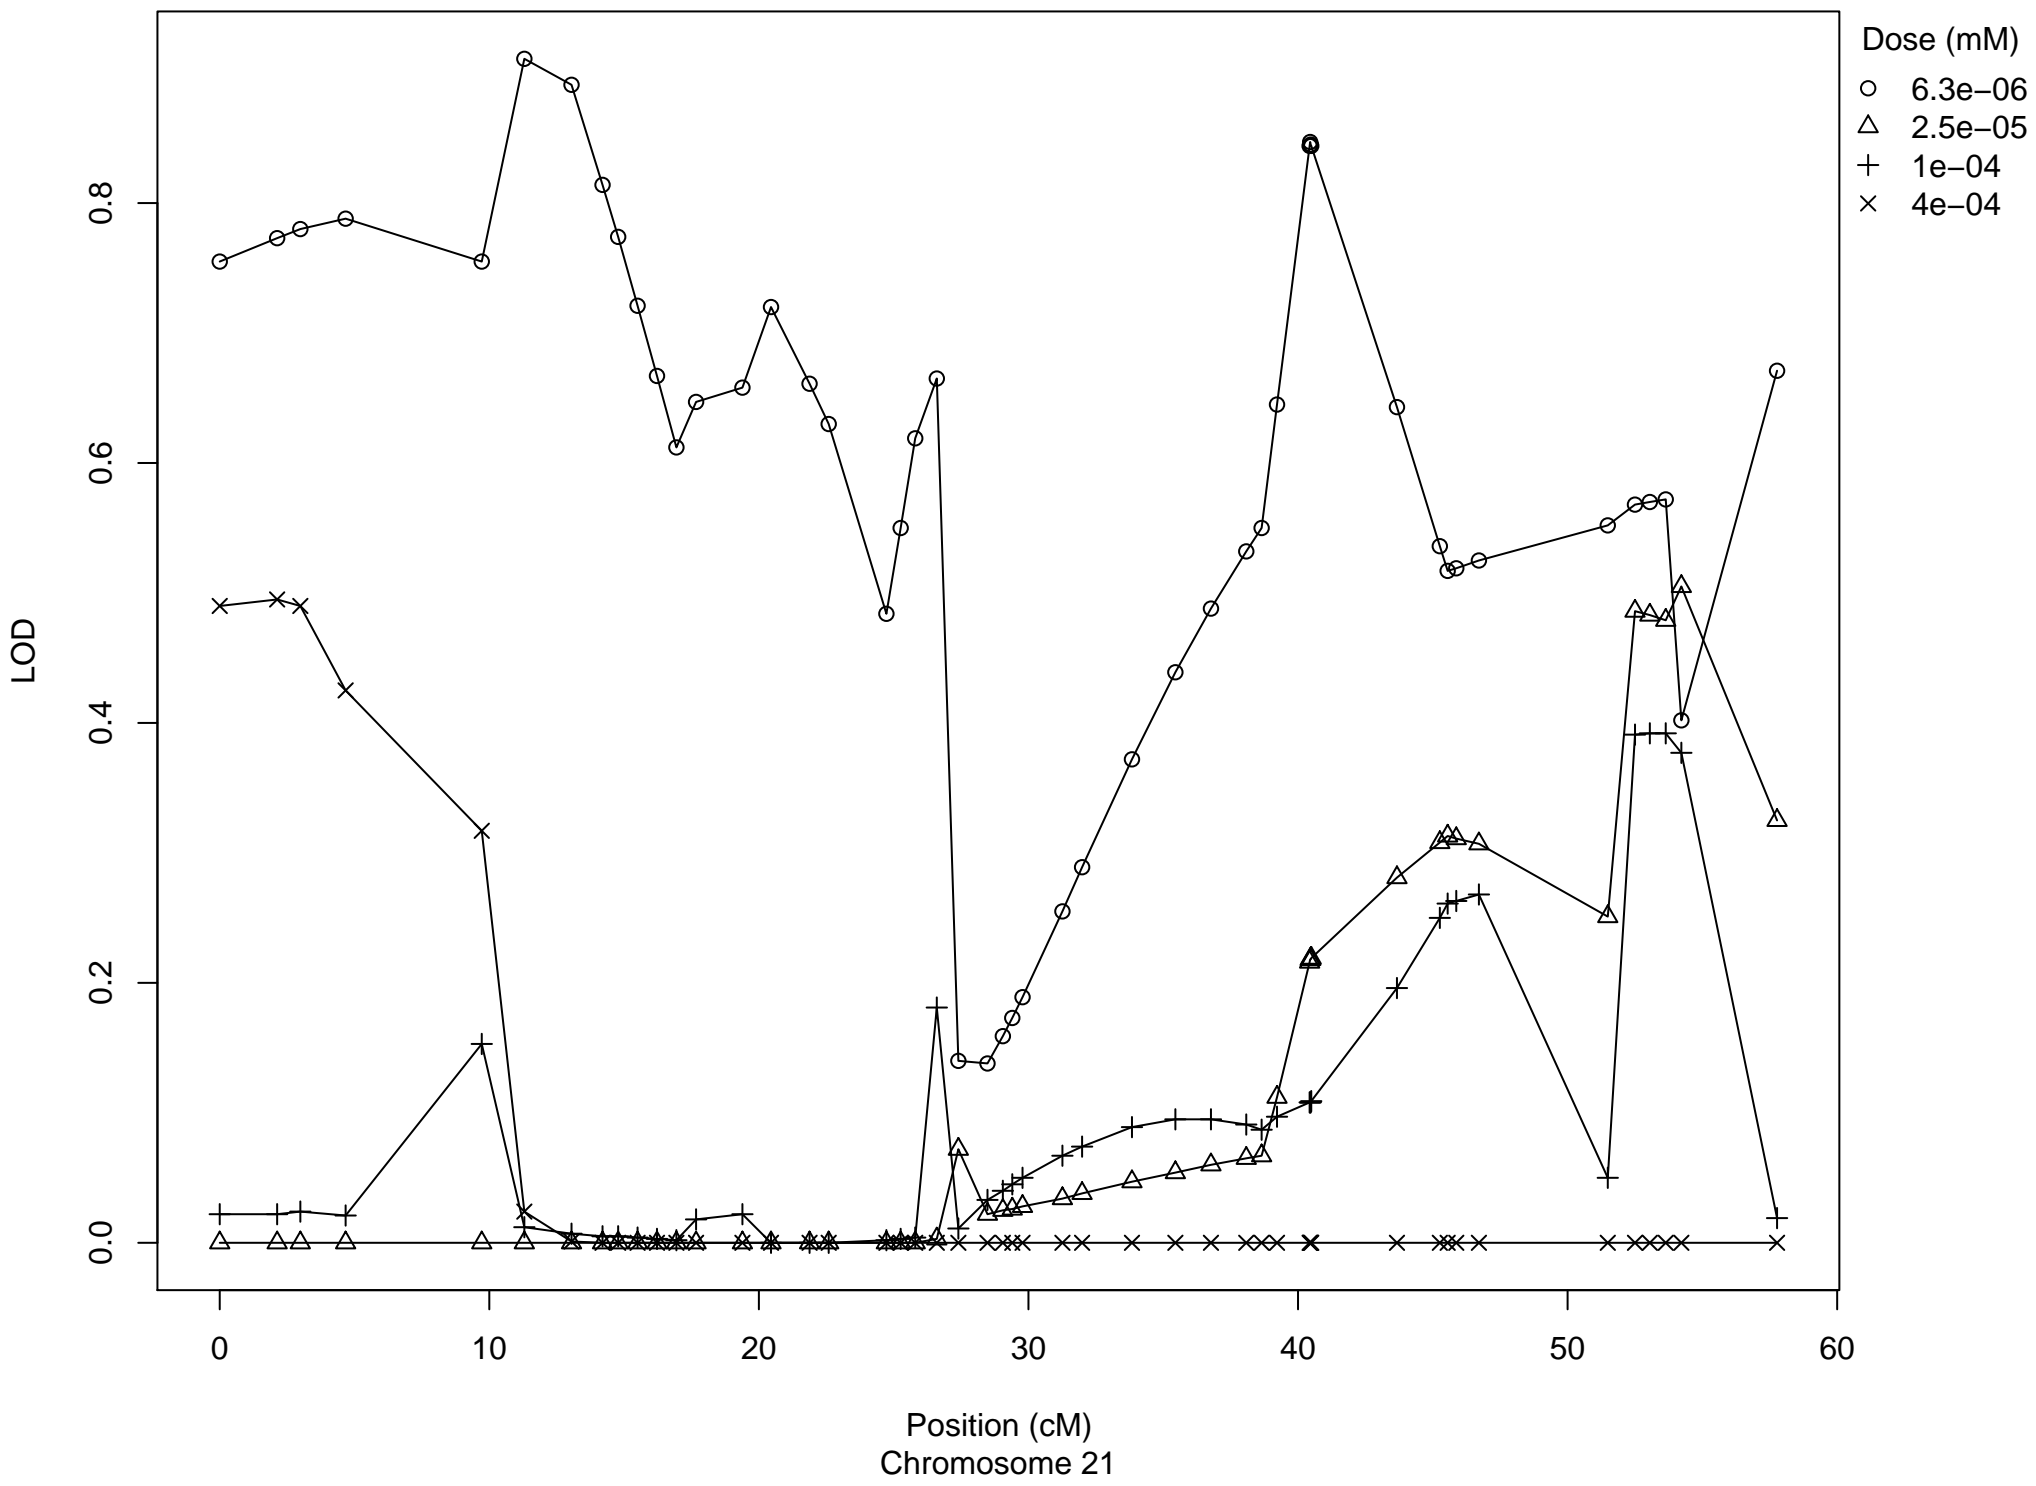

# Epirubicin hydrochloride (Epi)

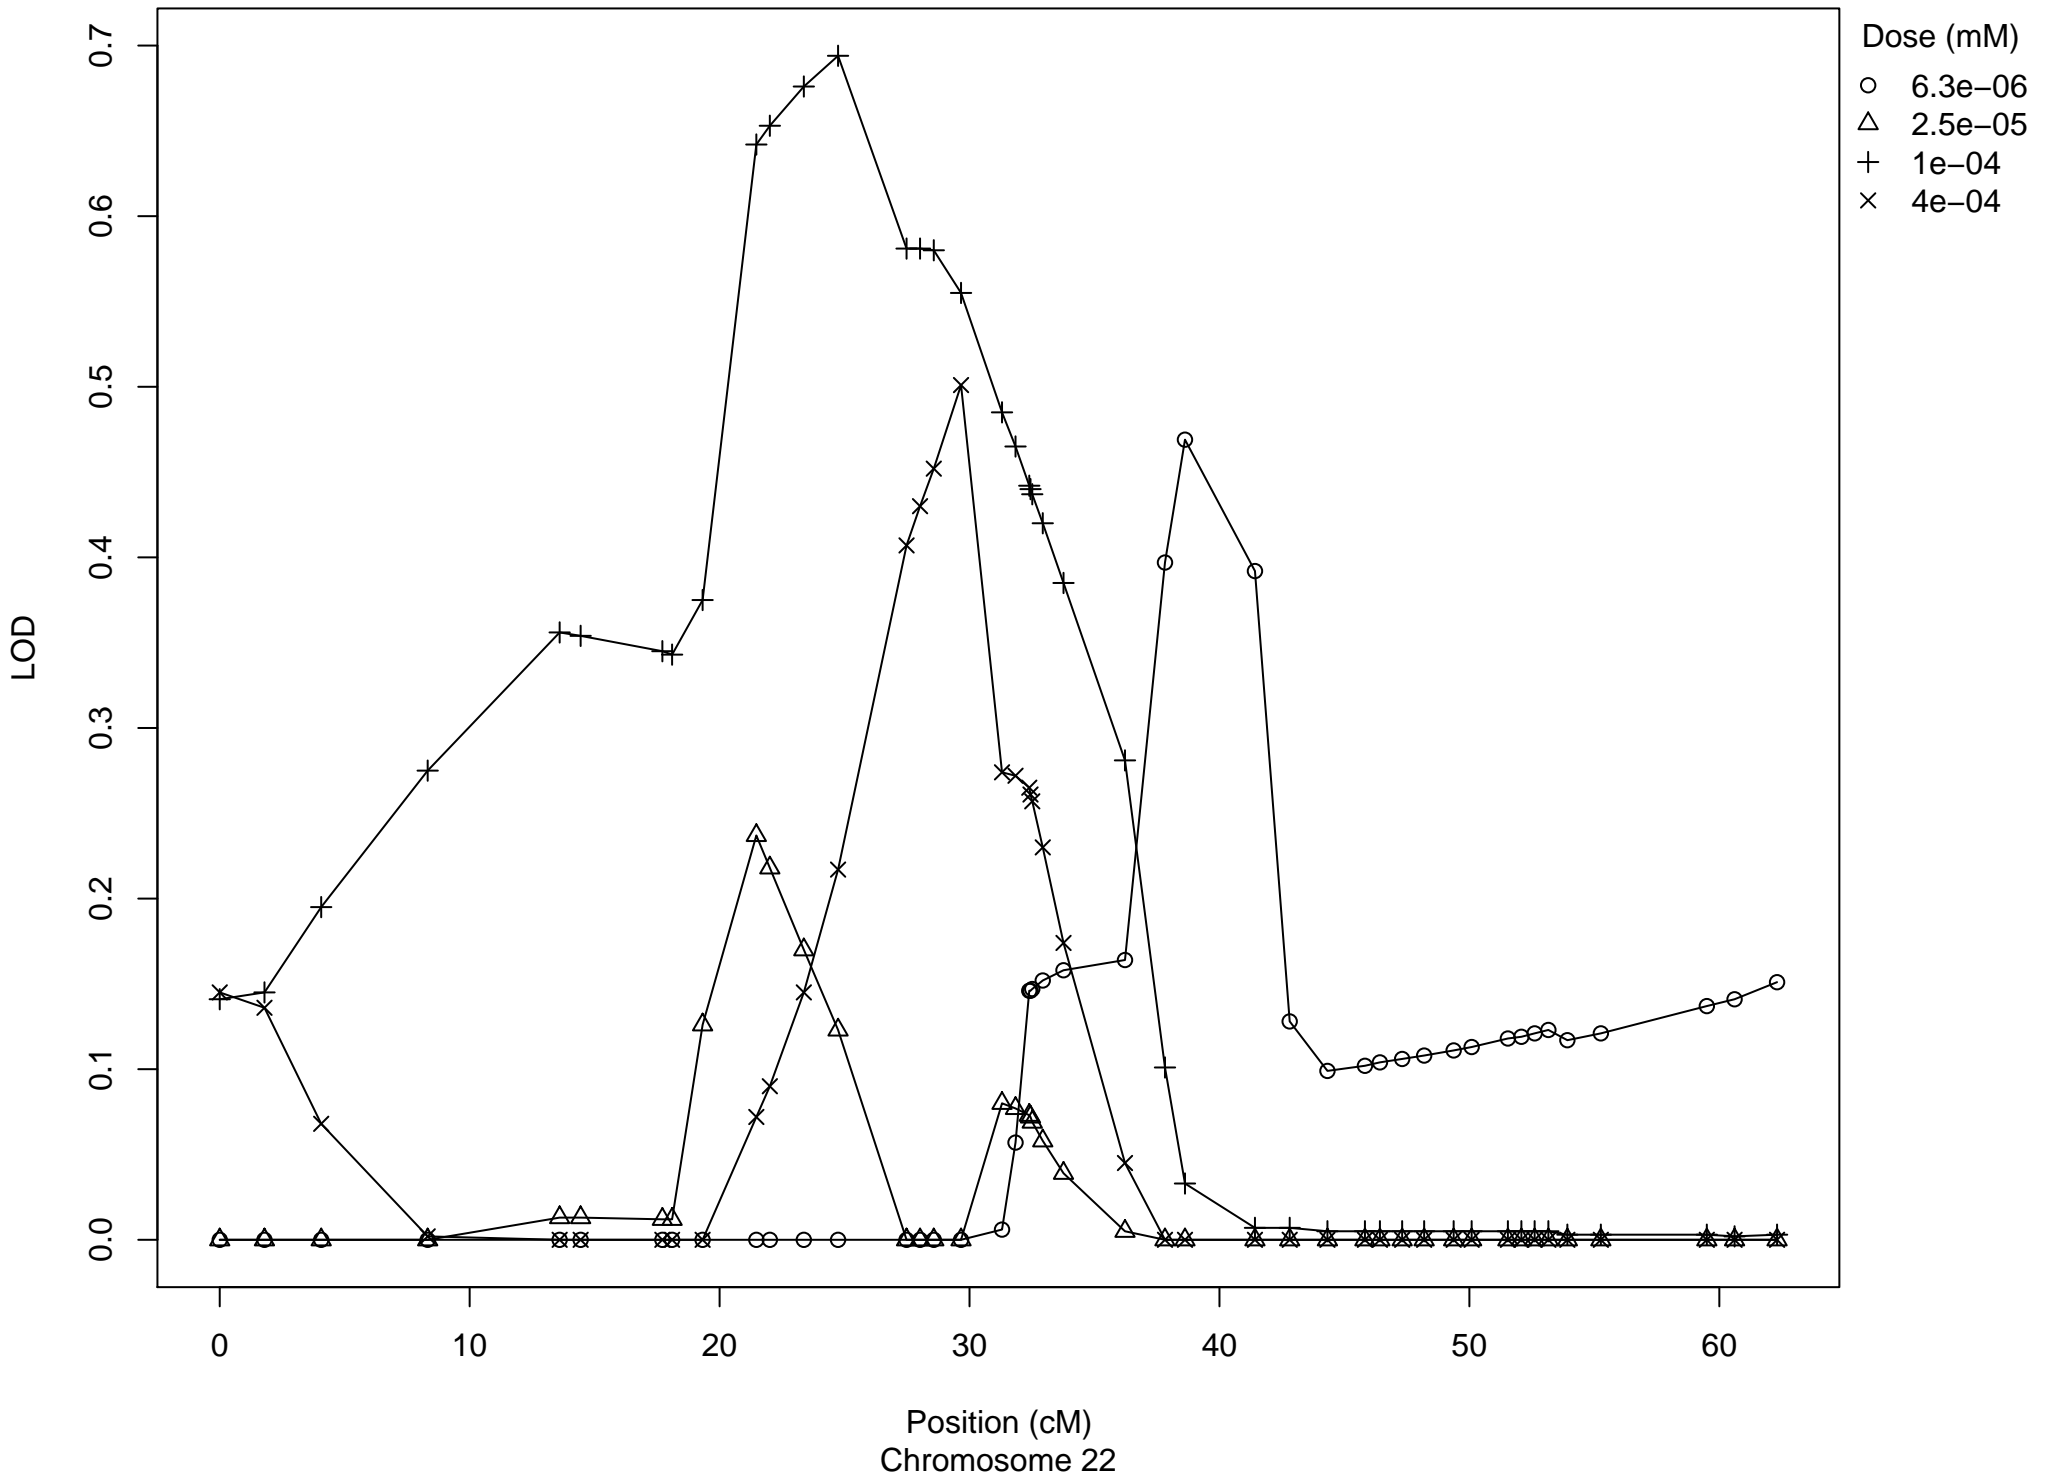

# Etoposide (Etop)

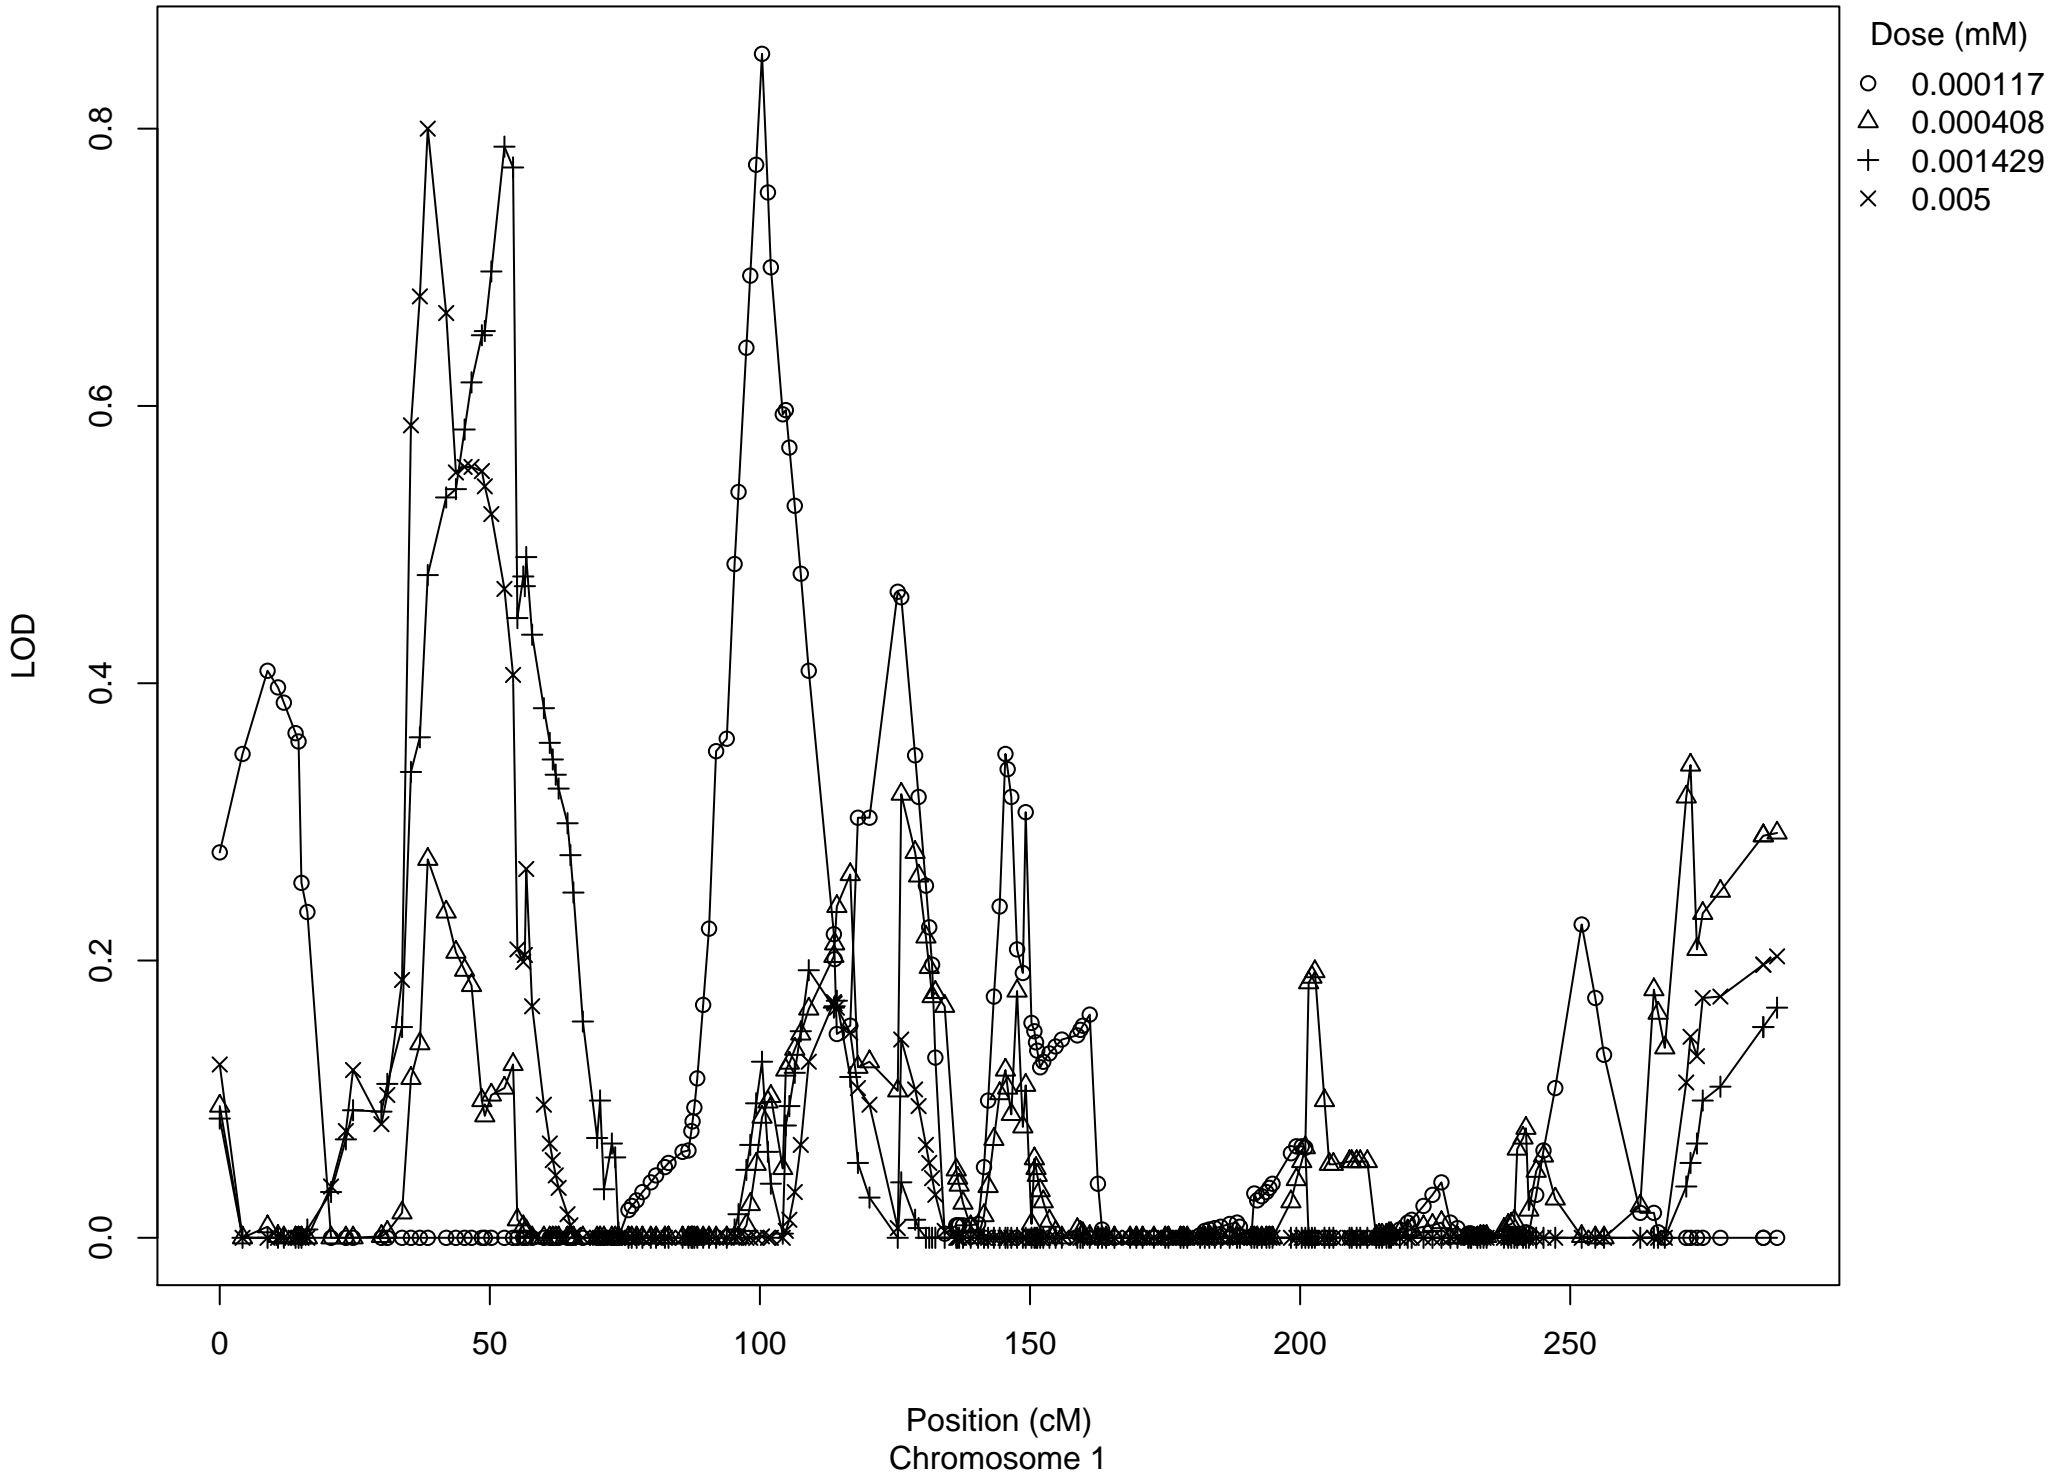

# Etoposide (Etop)

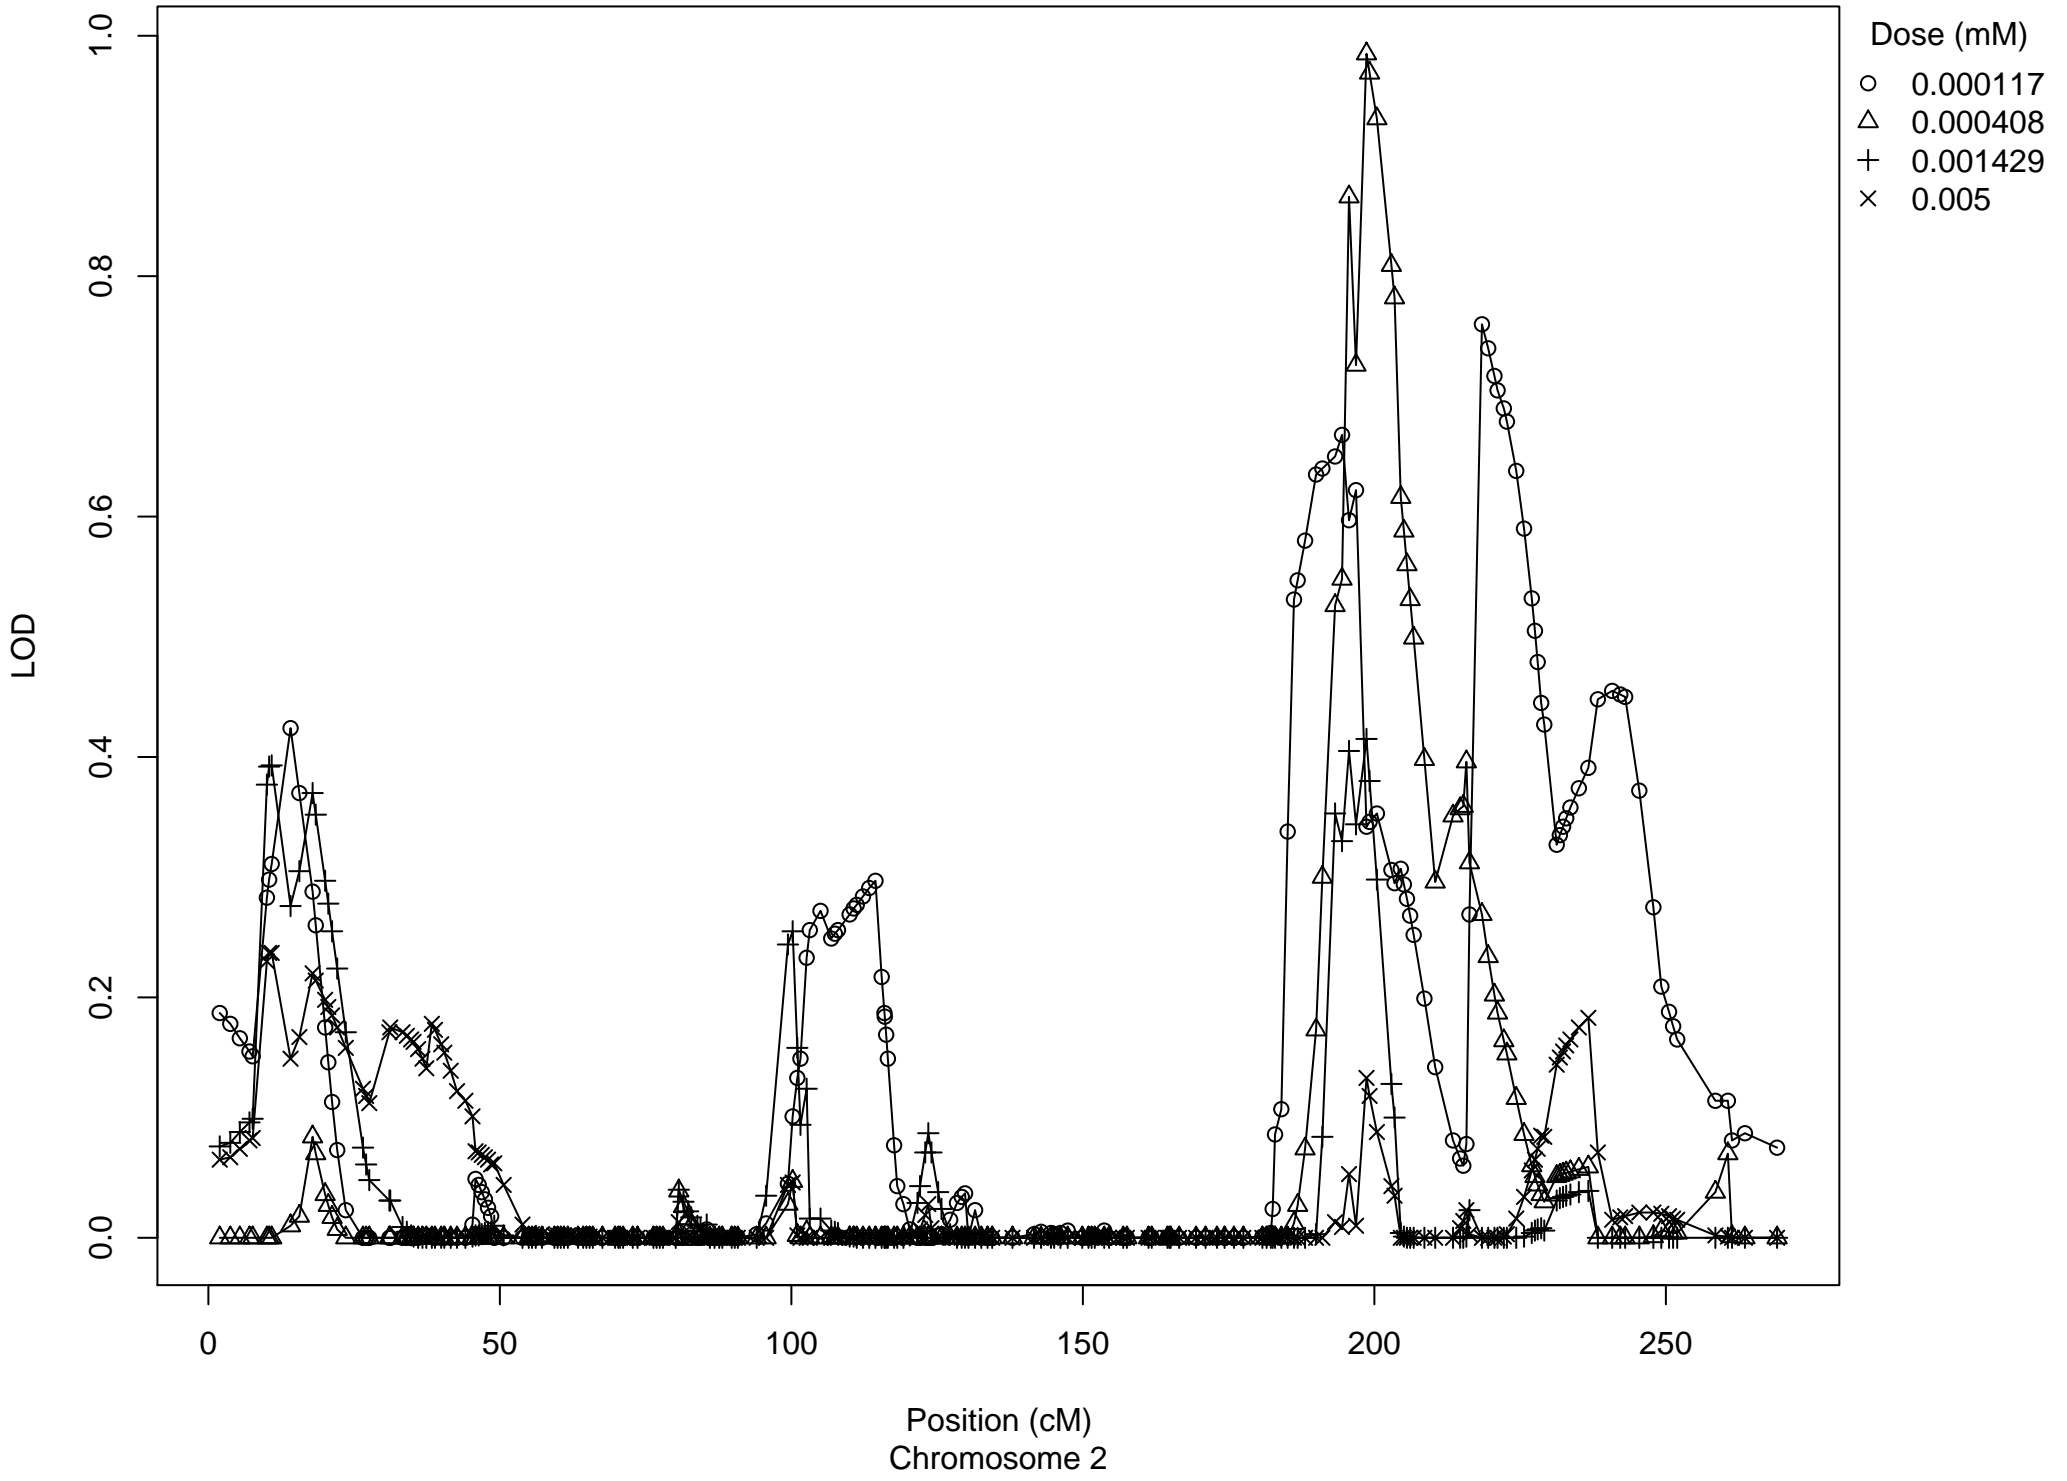

# Etoposide (Etop)

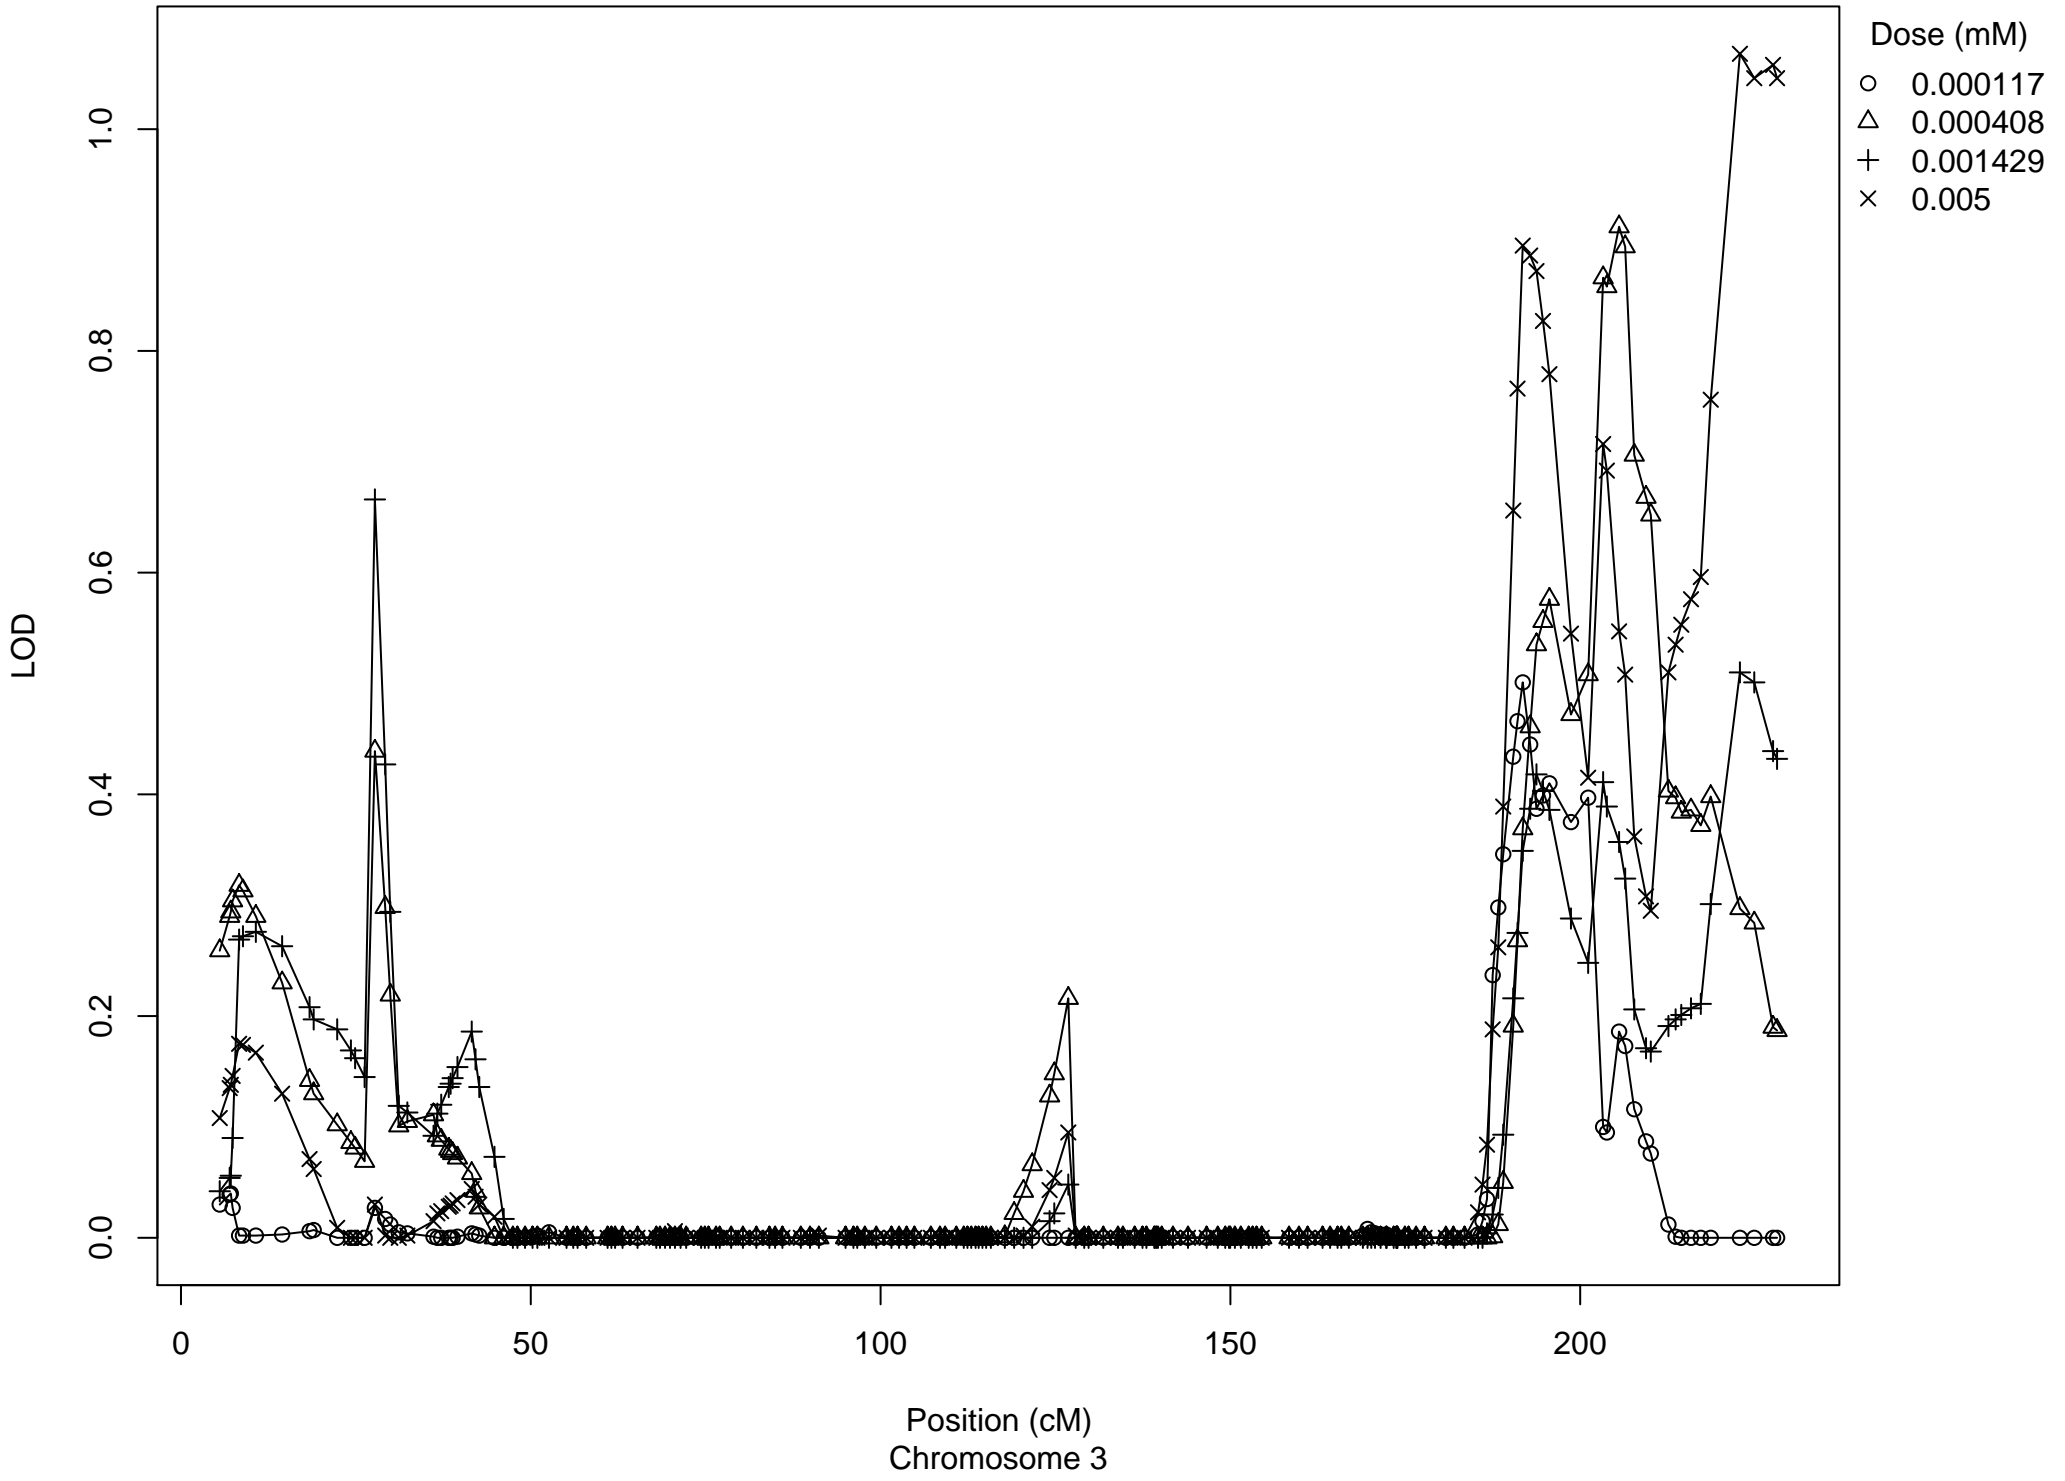

# Etoposide (Etop)

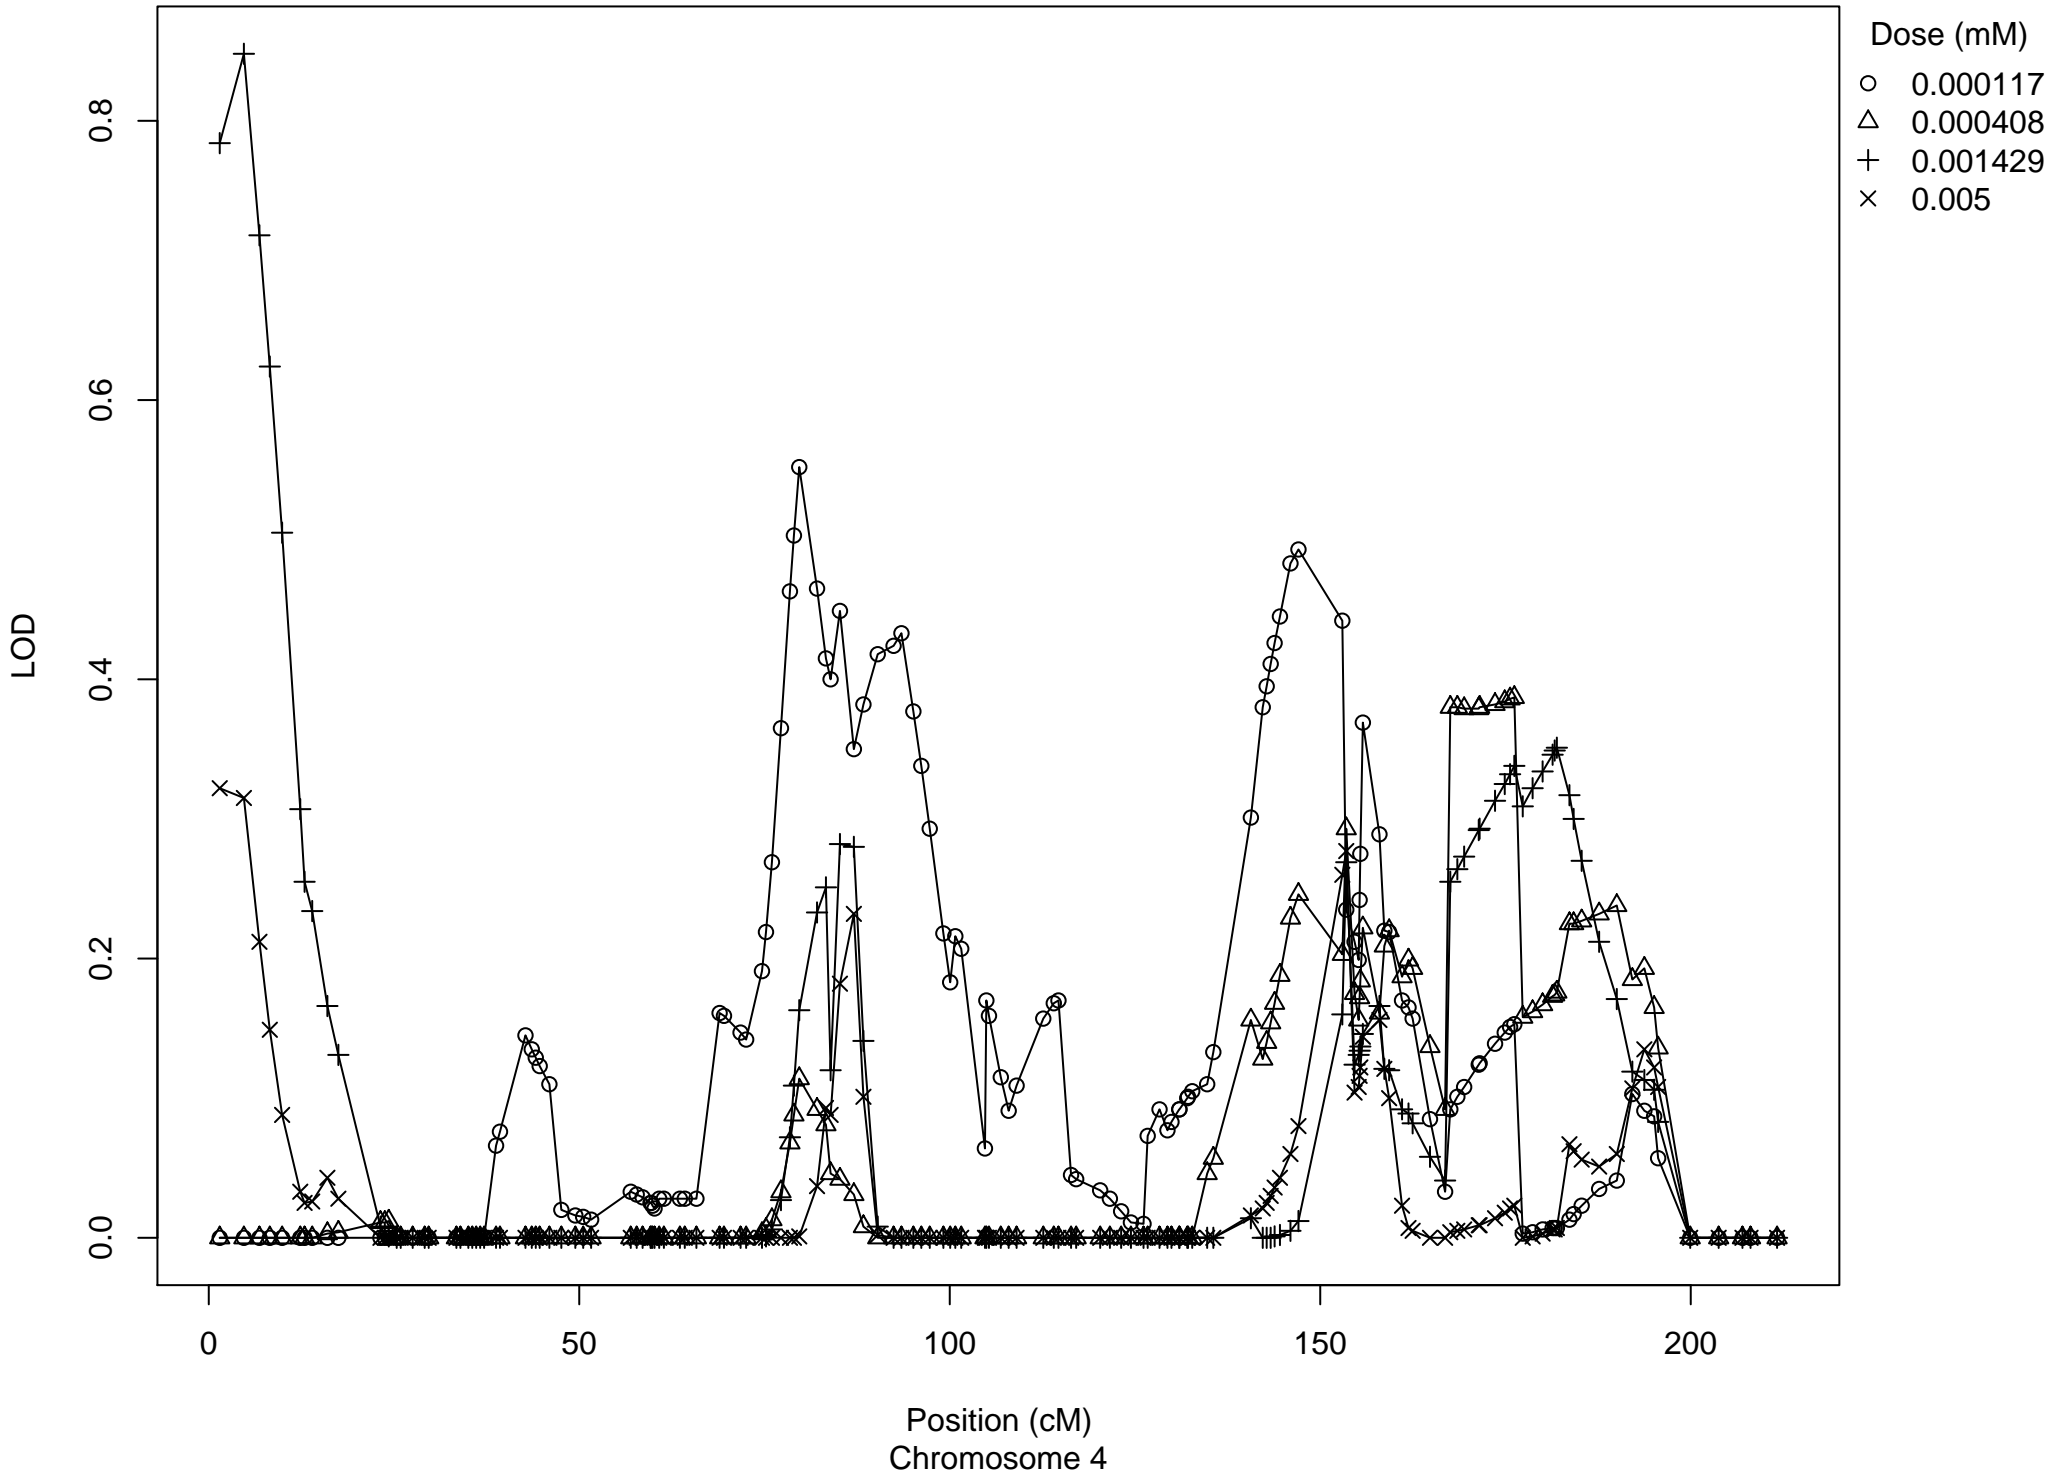



# Etoposide (Etop)

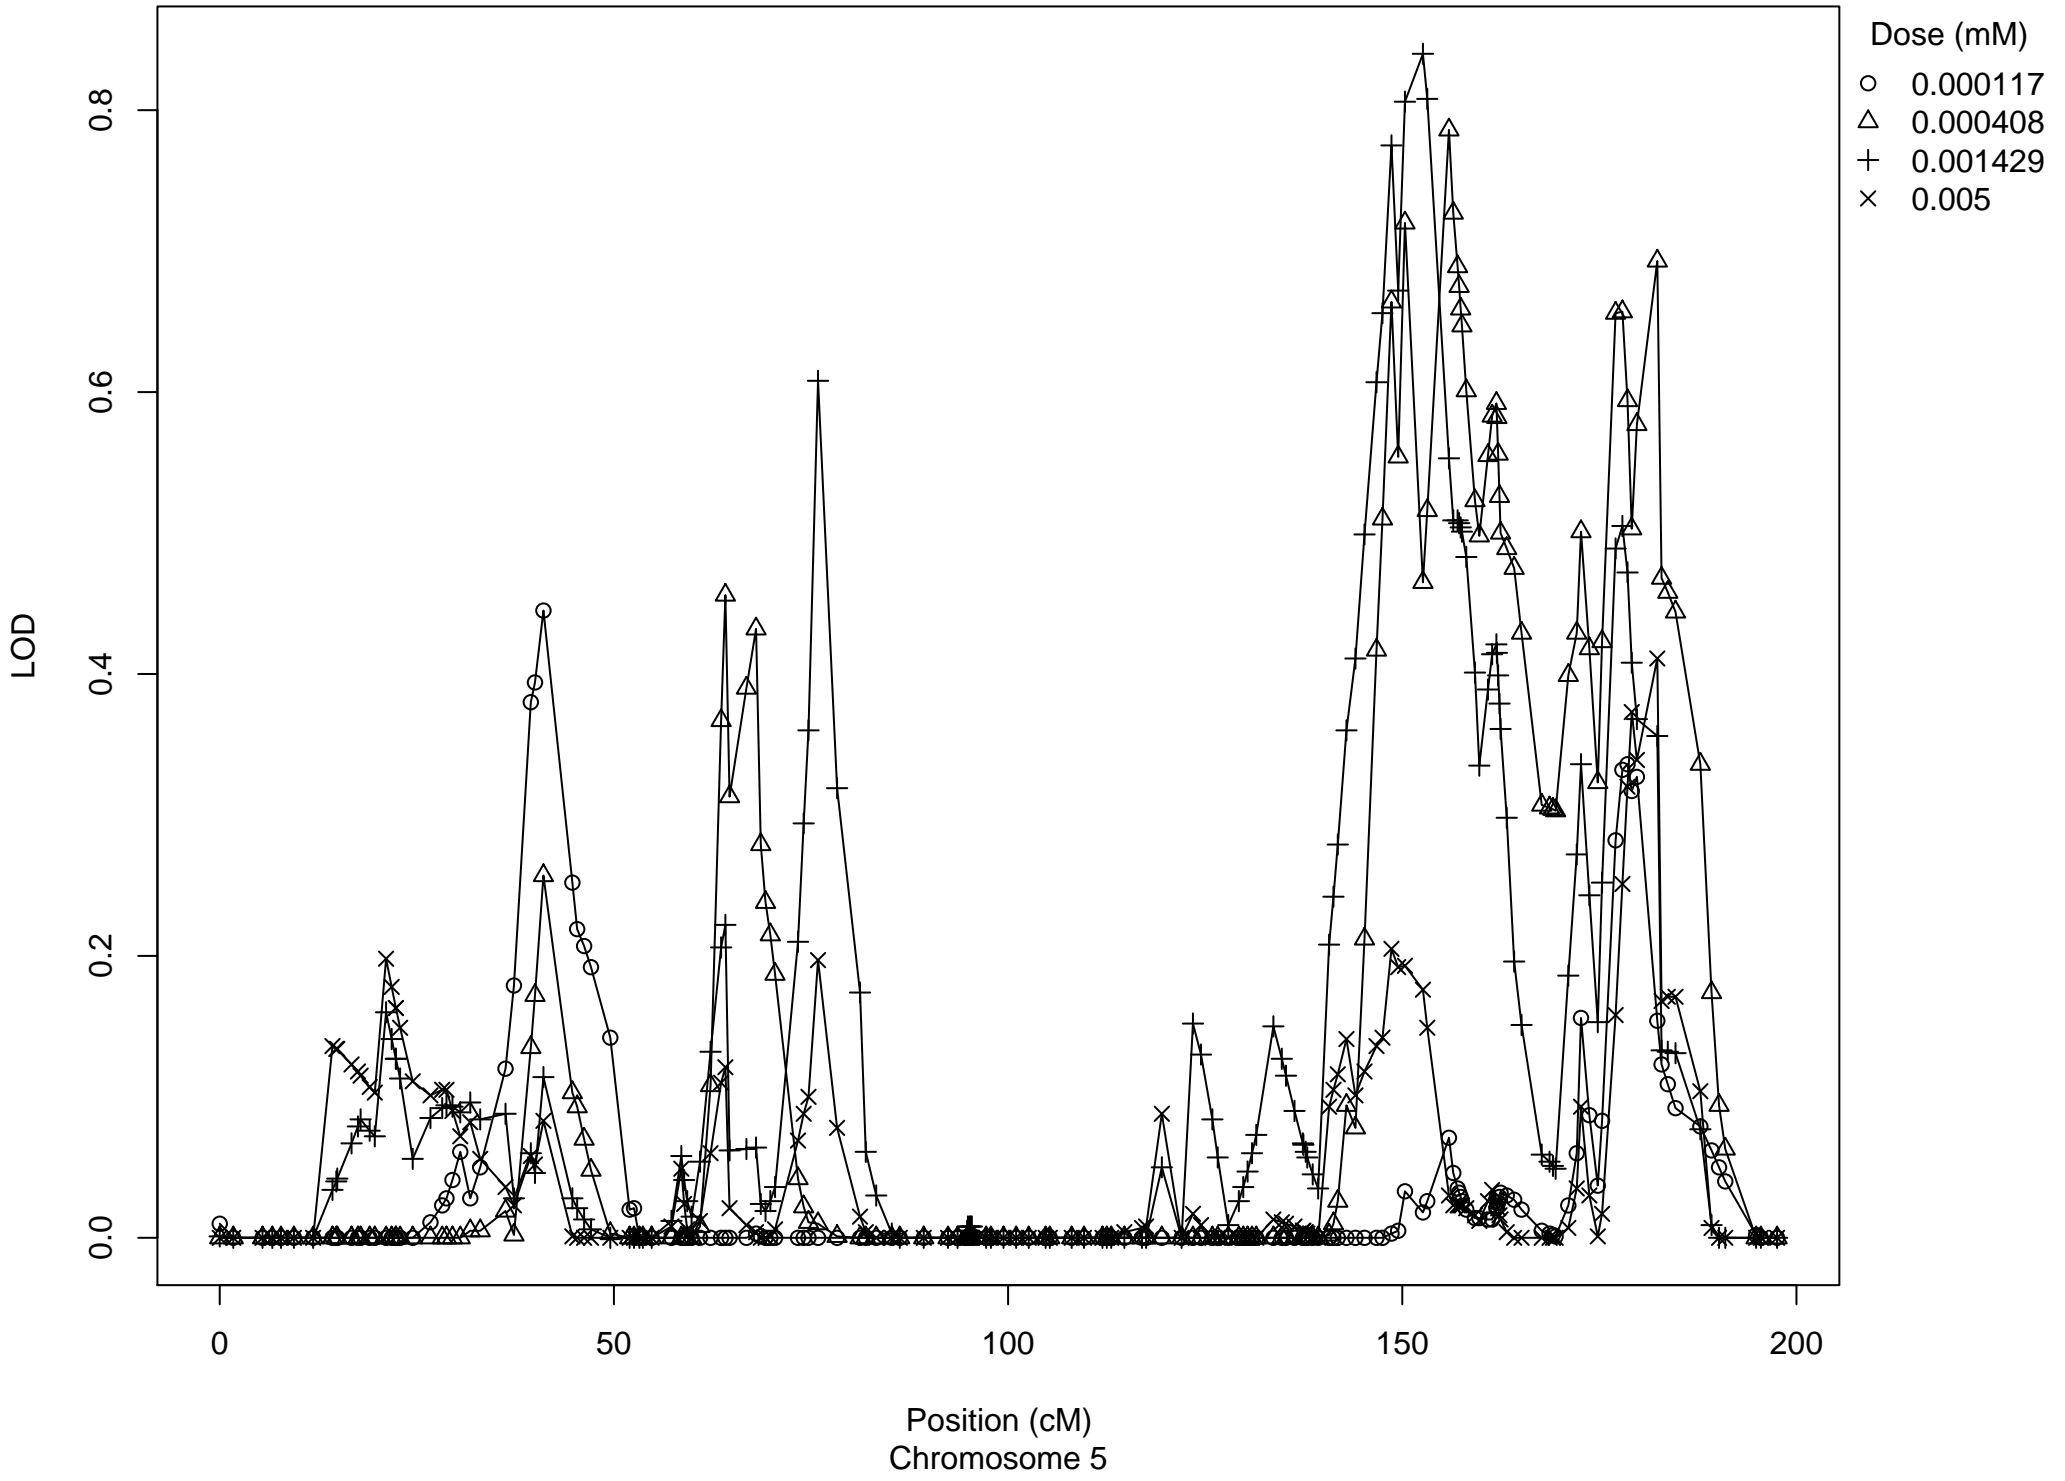

# Etoposide (Etop)

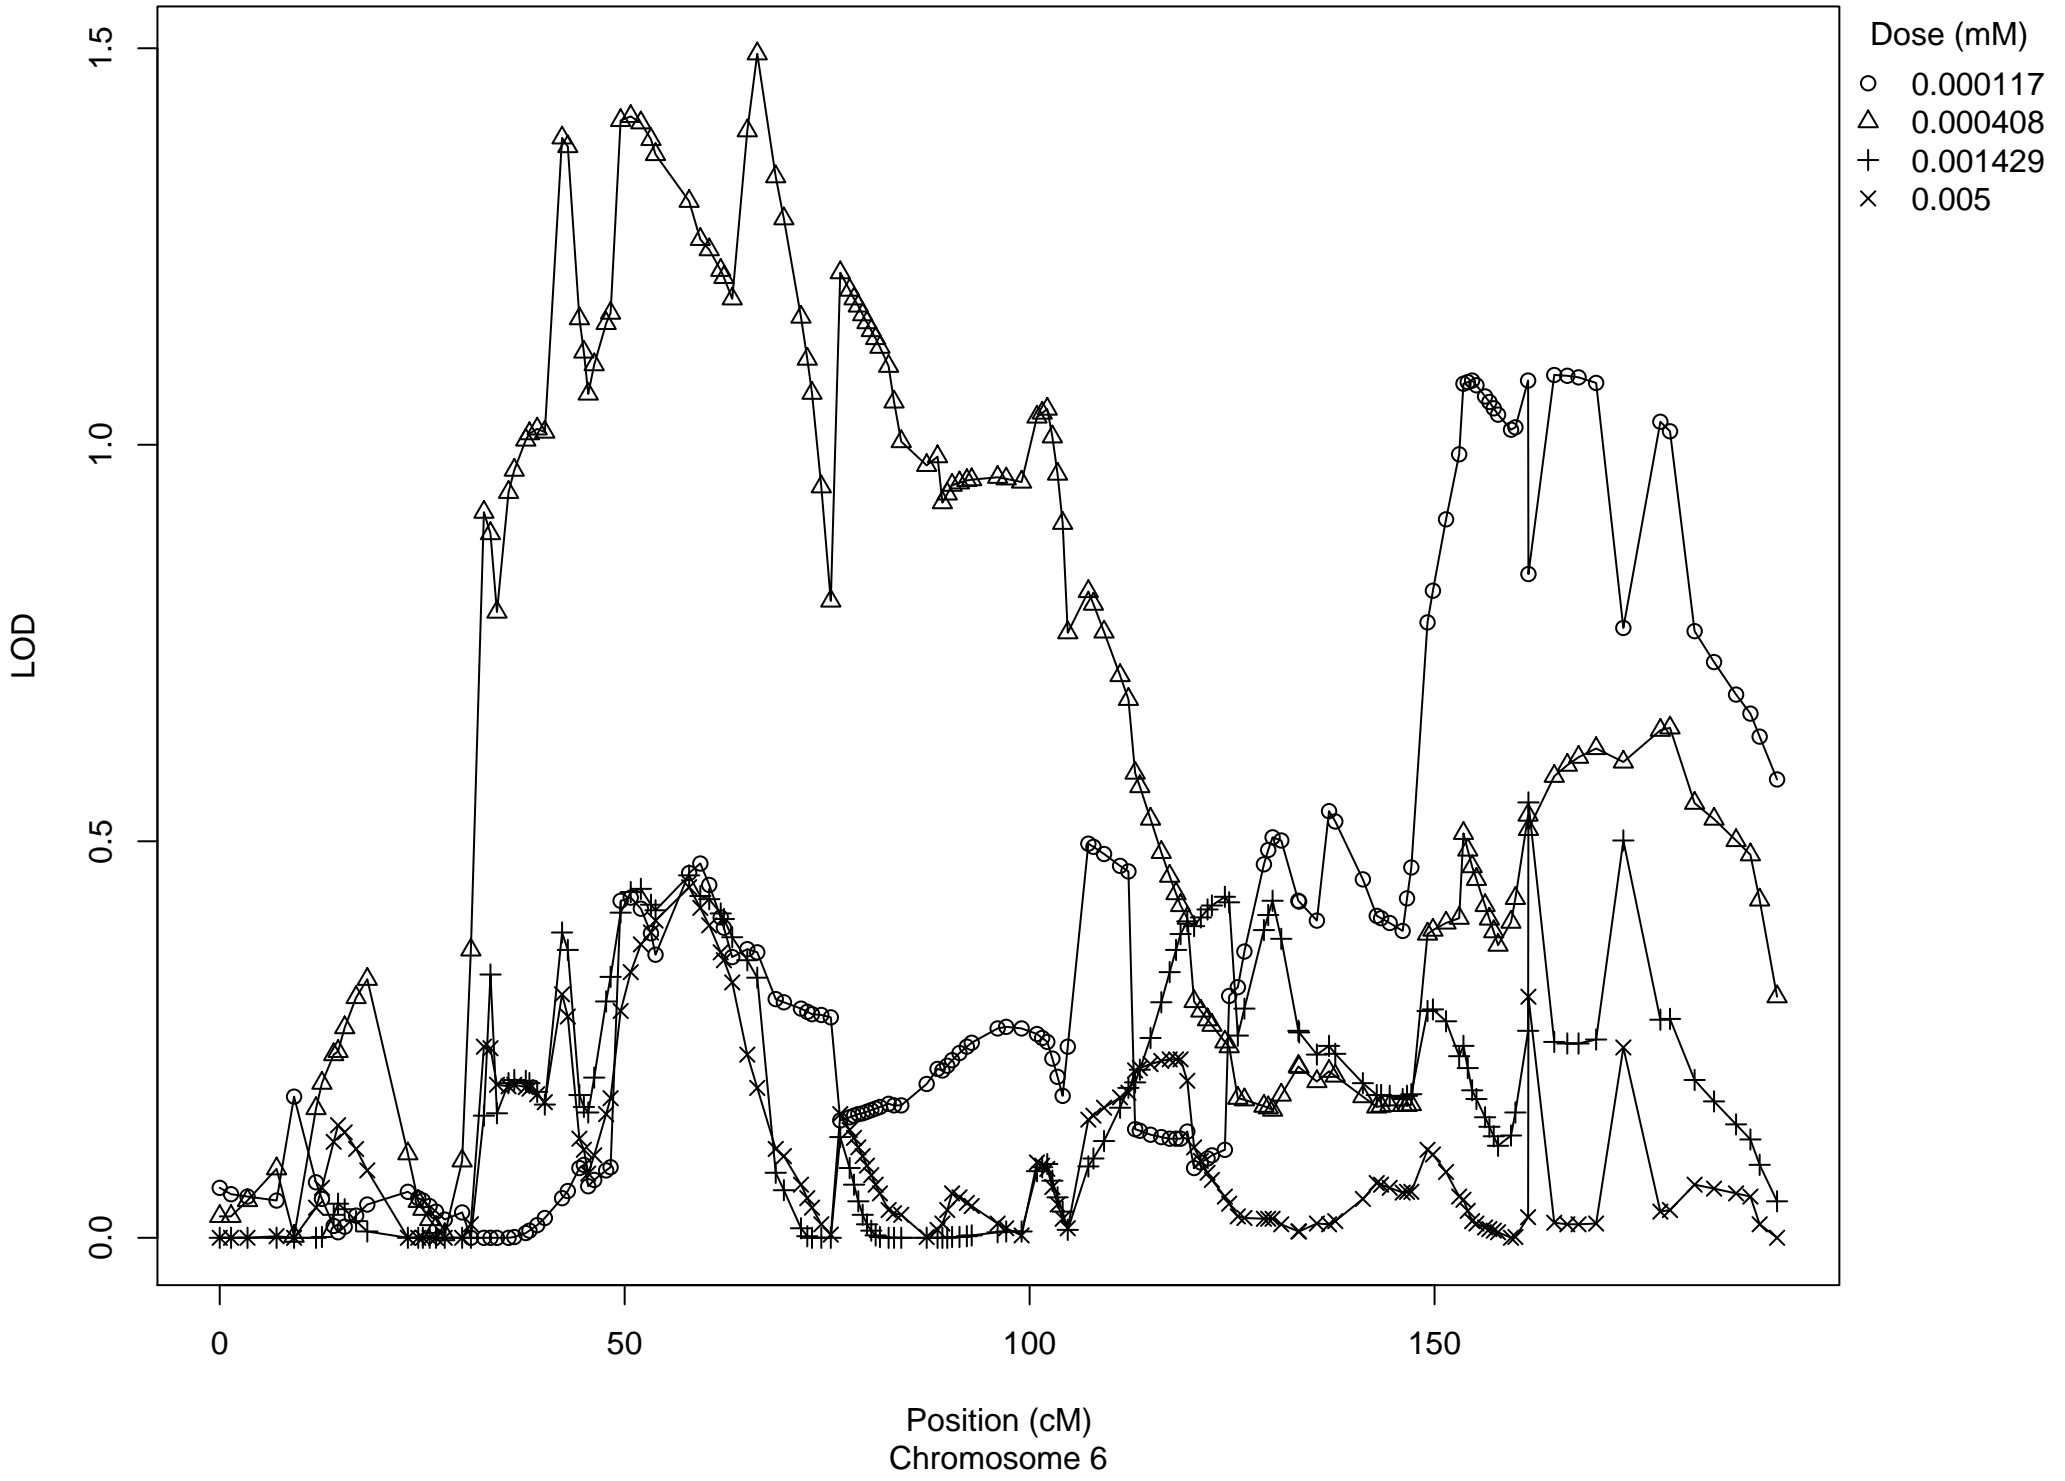

# Etoposide (Etop)

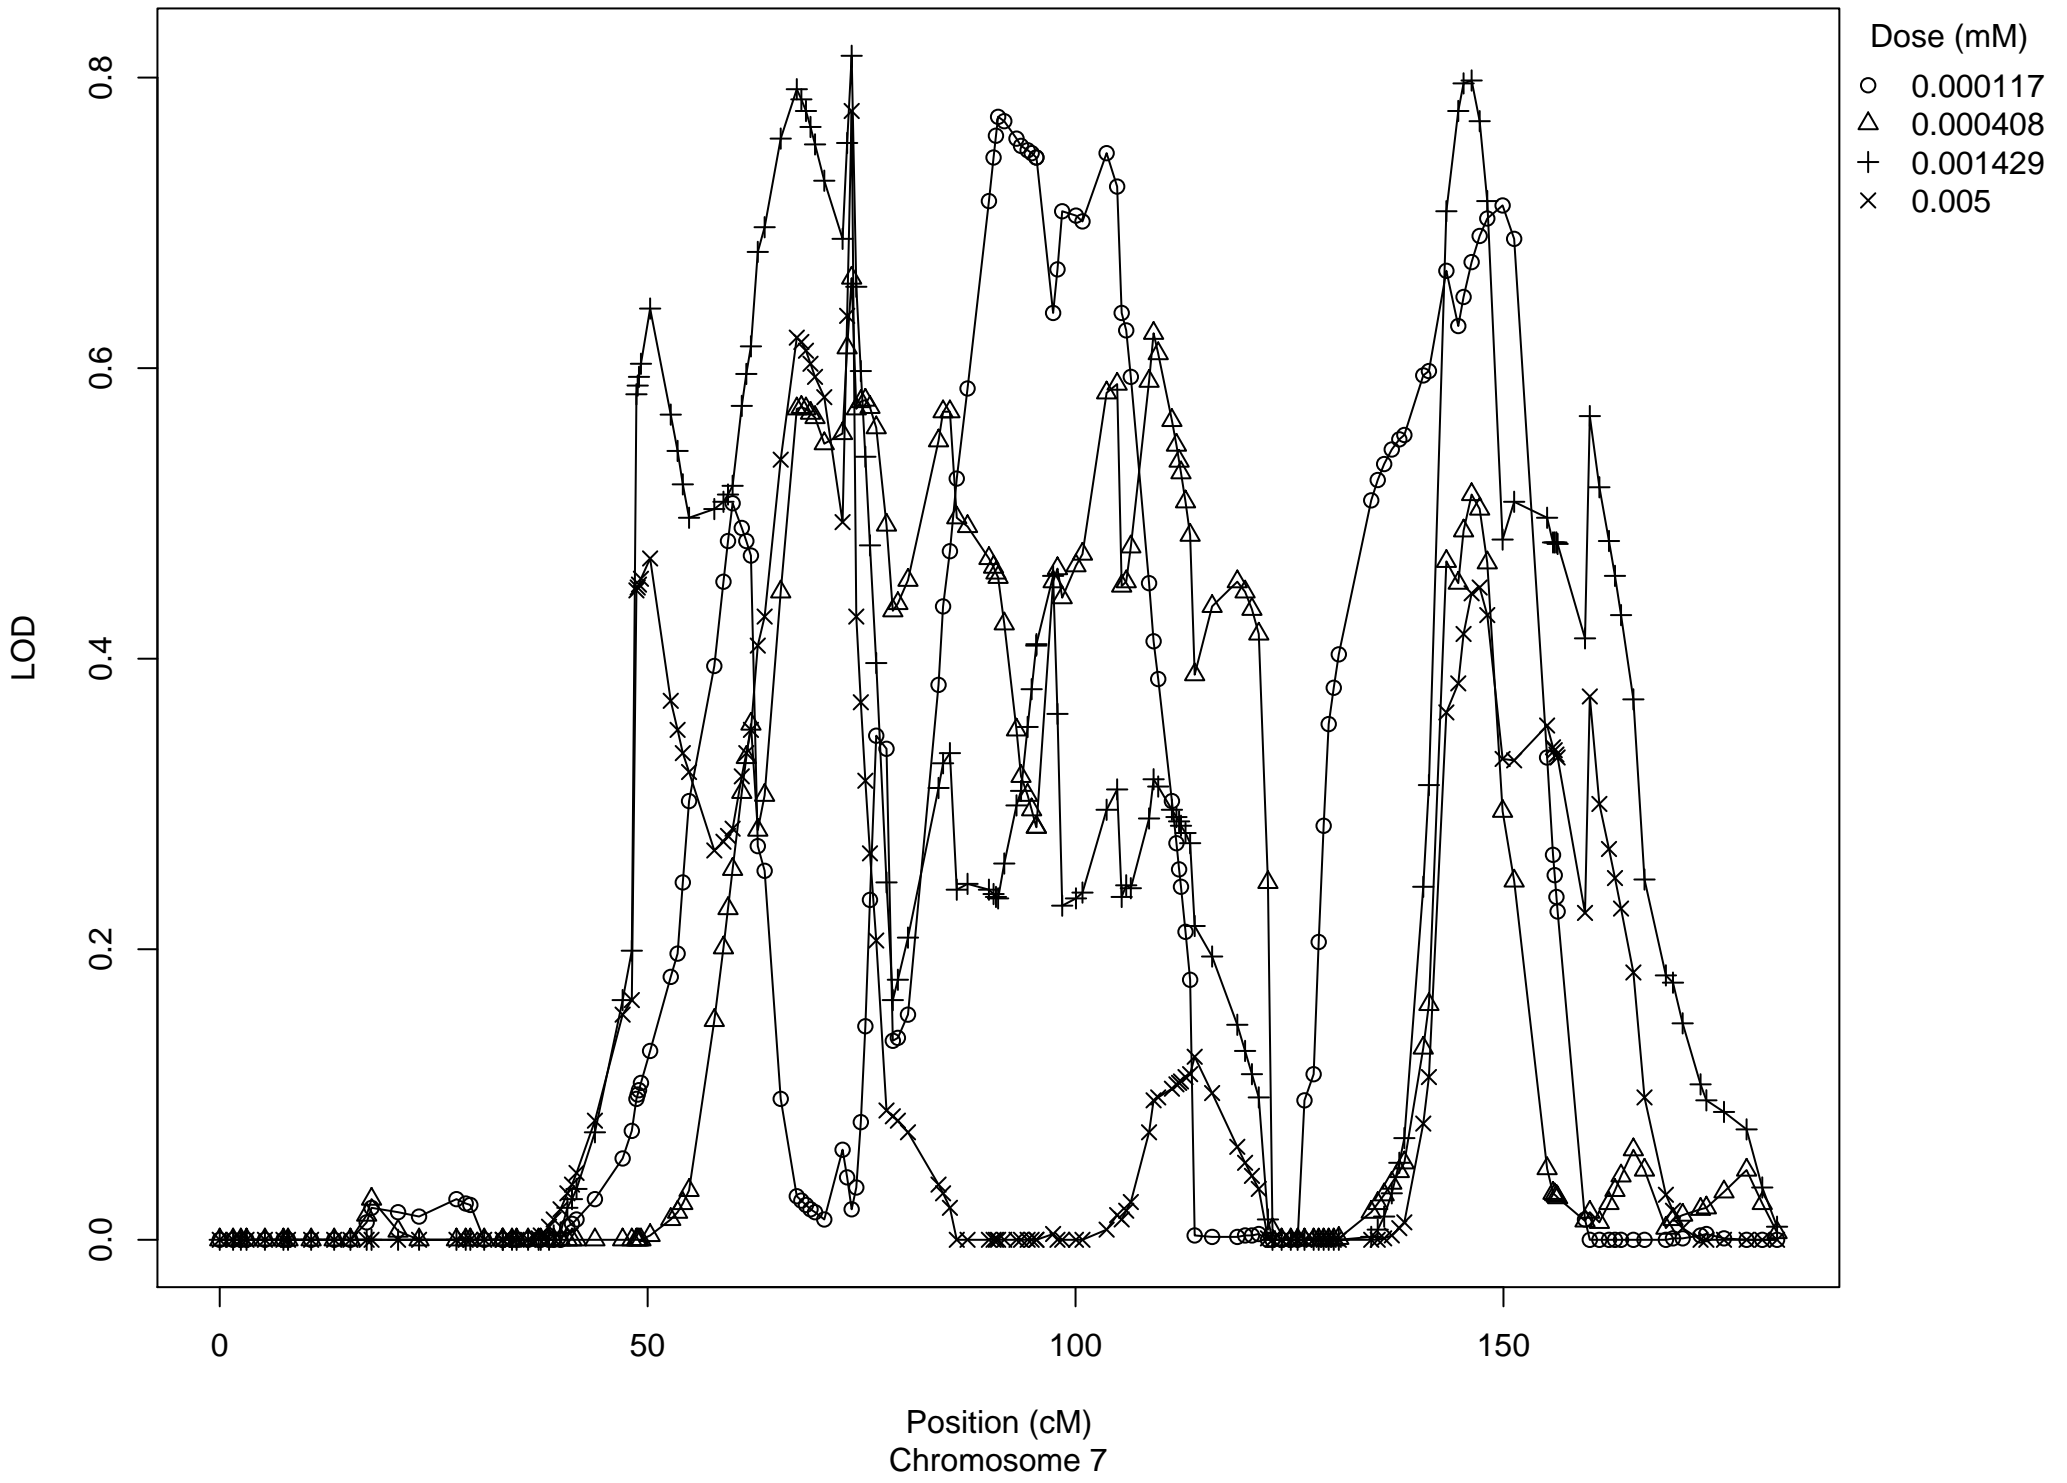

# Etoposide (Etop)

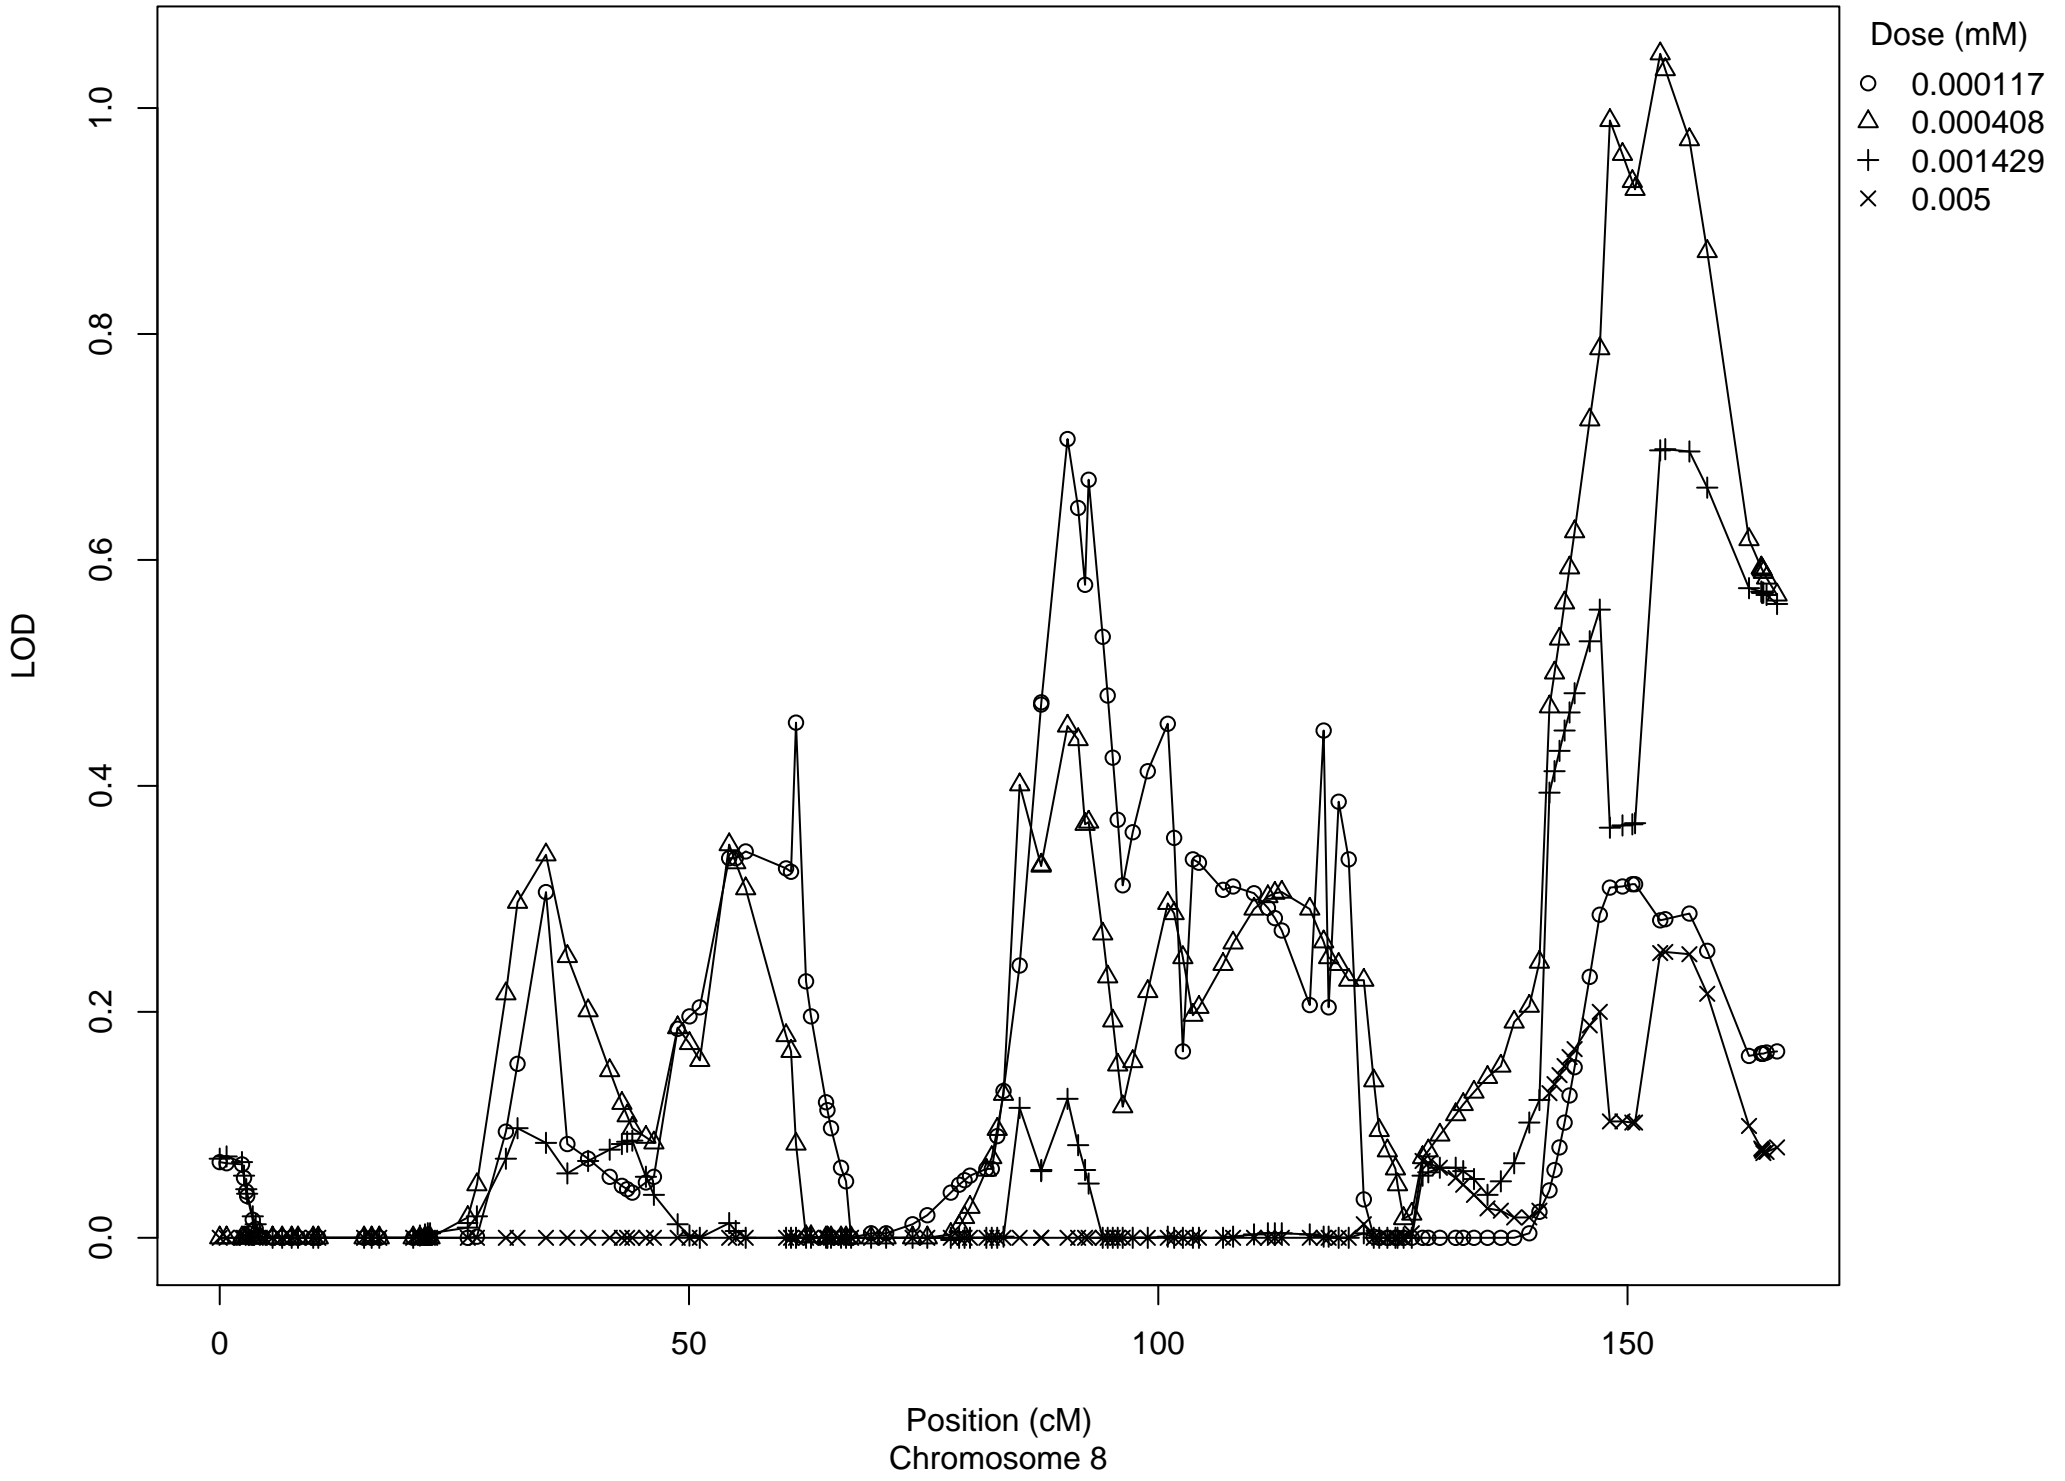

# Etoposide (Etop)

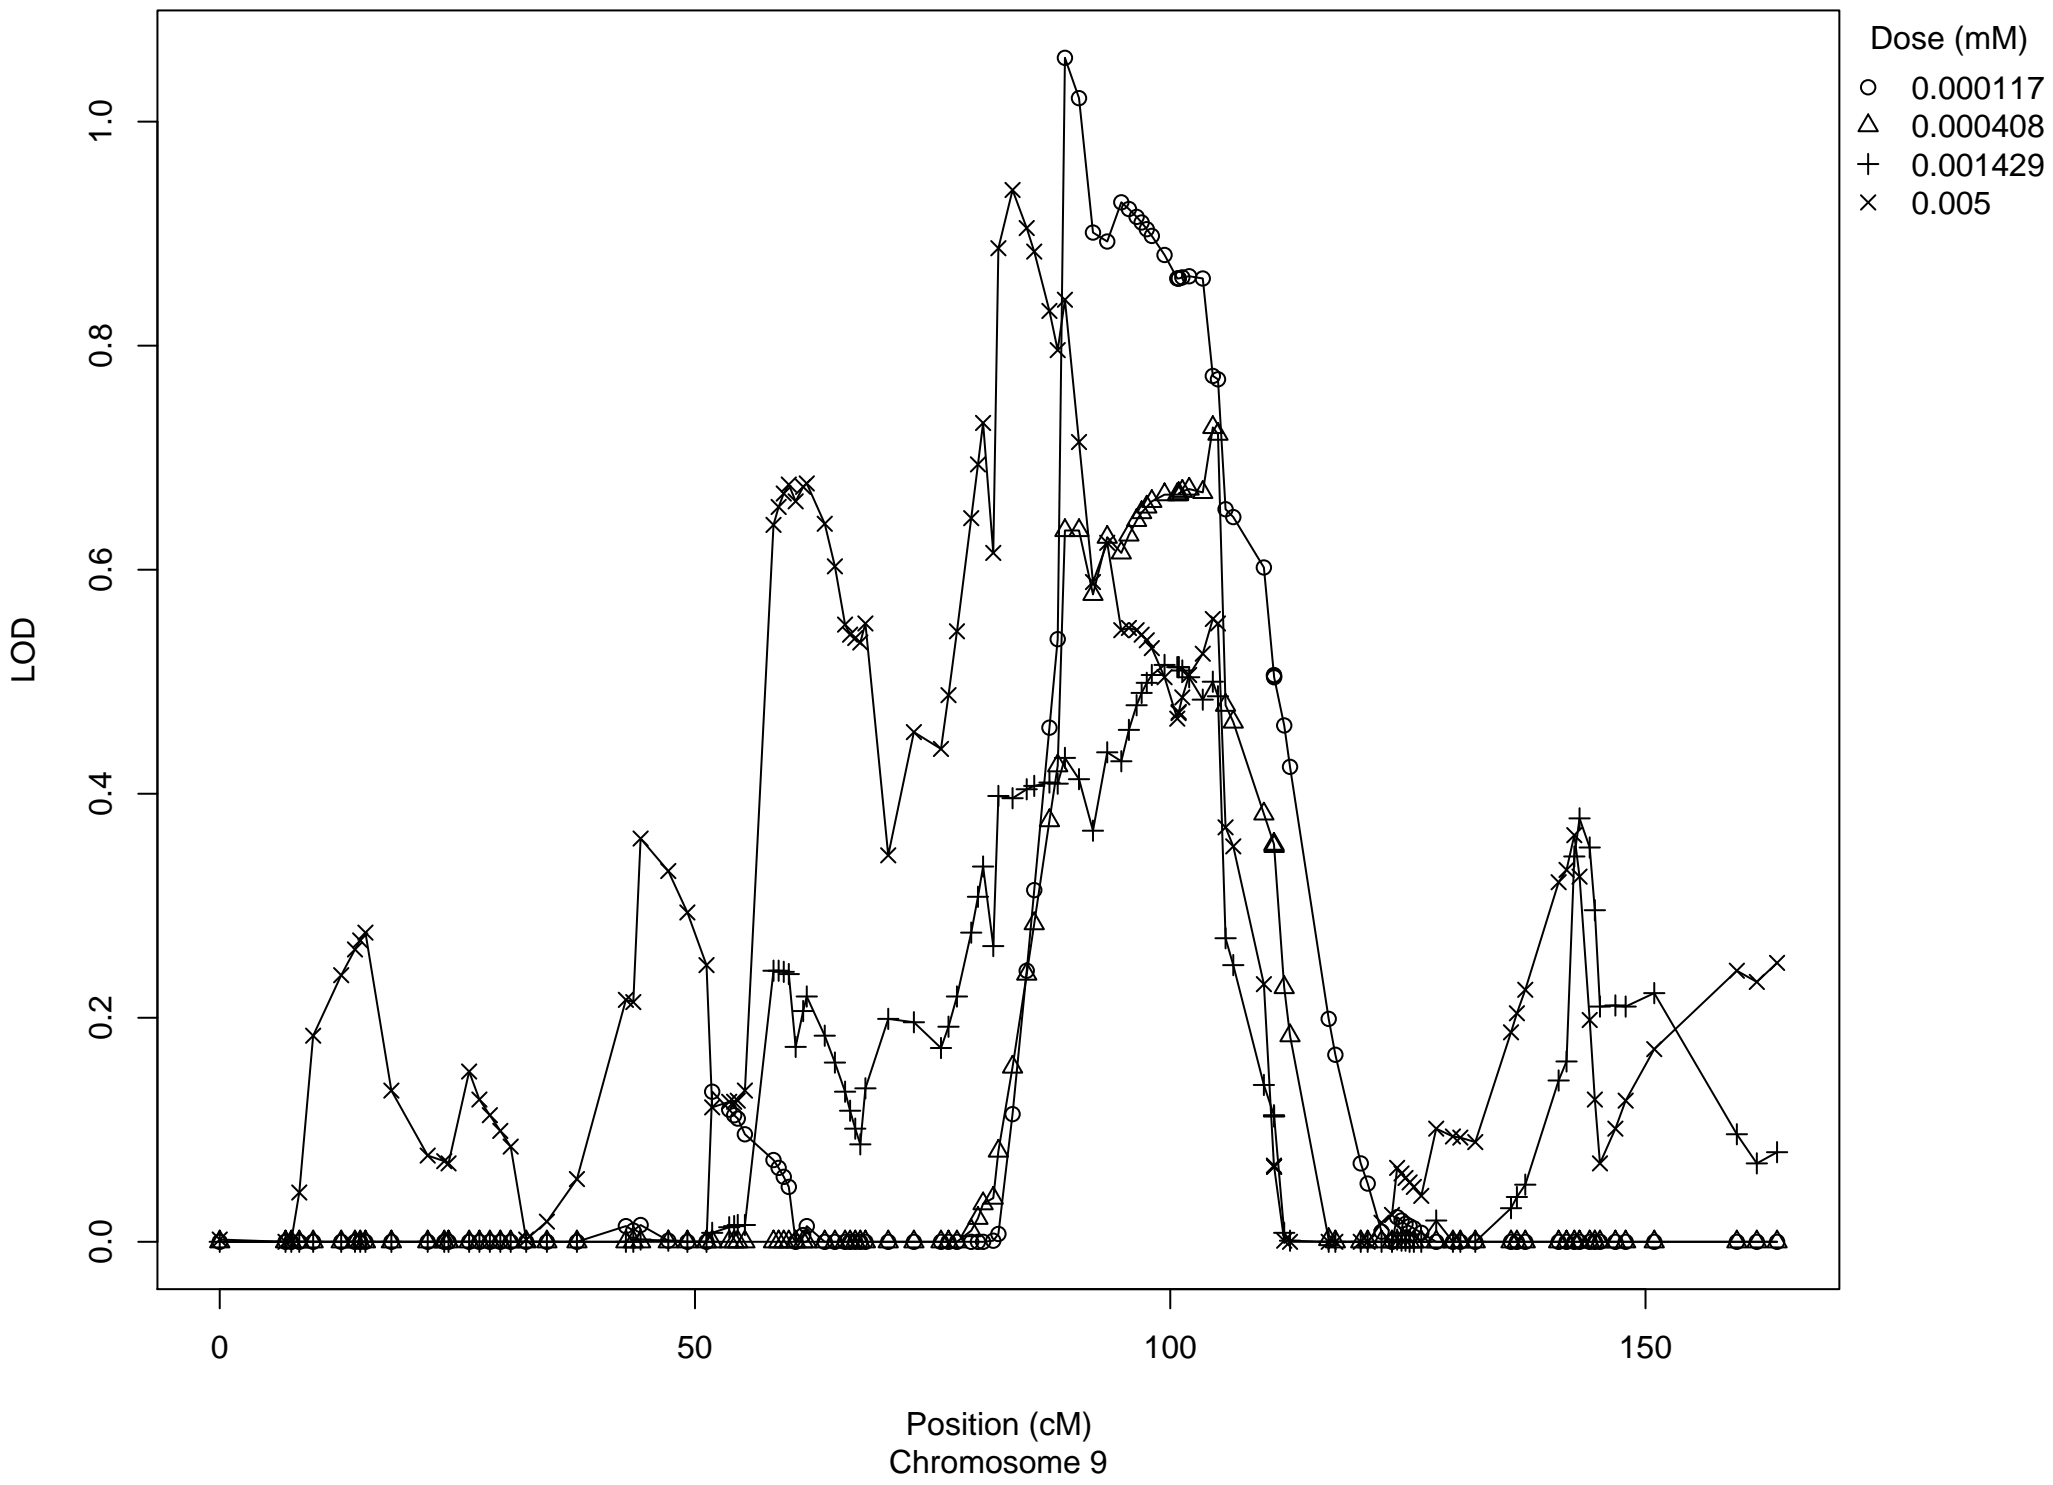

# Etoposide (Etop)

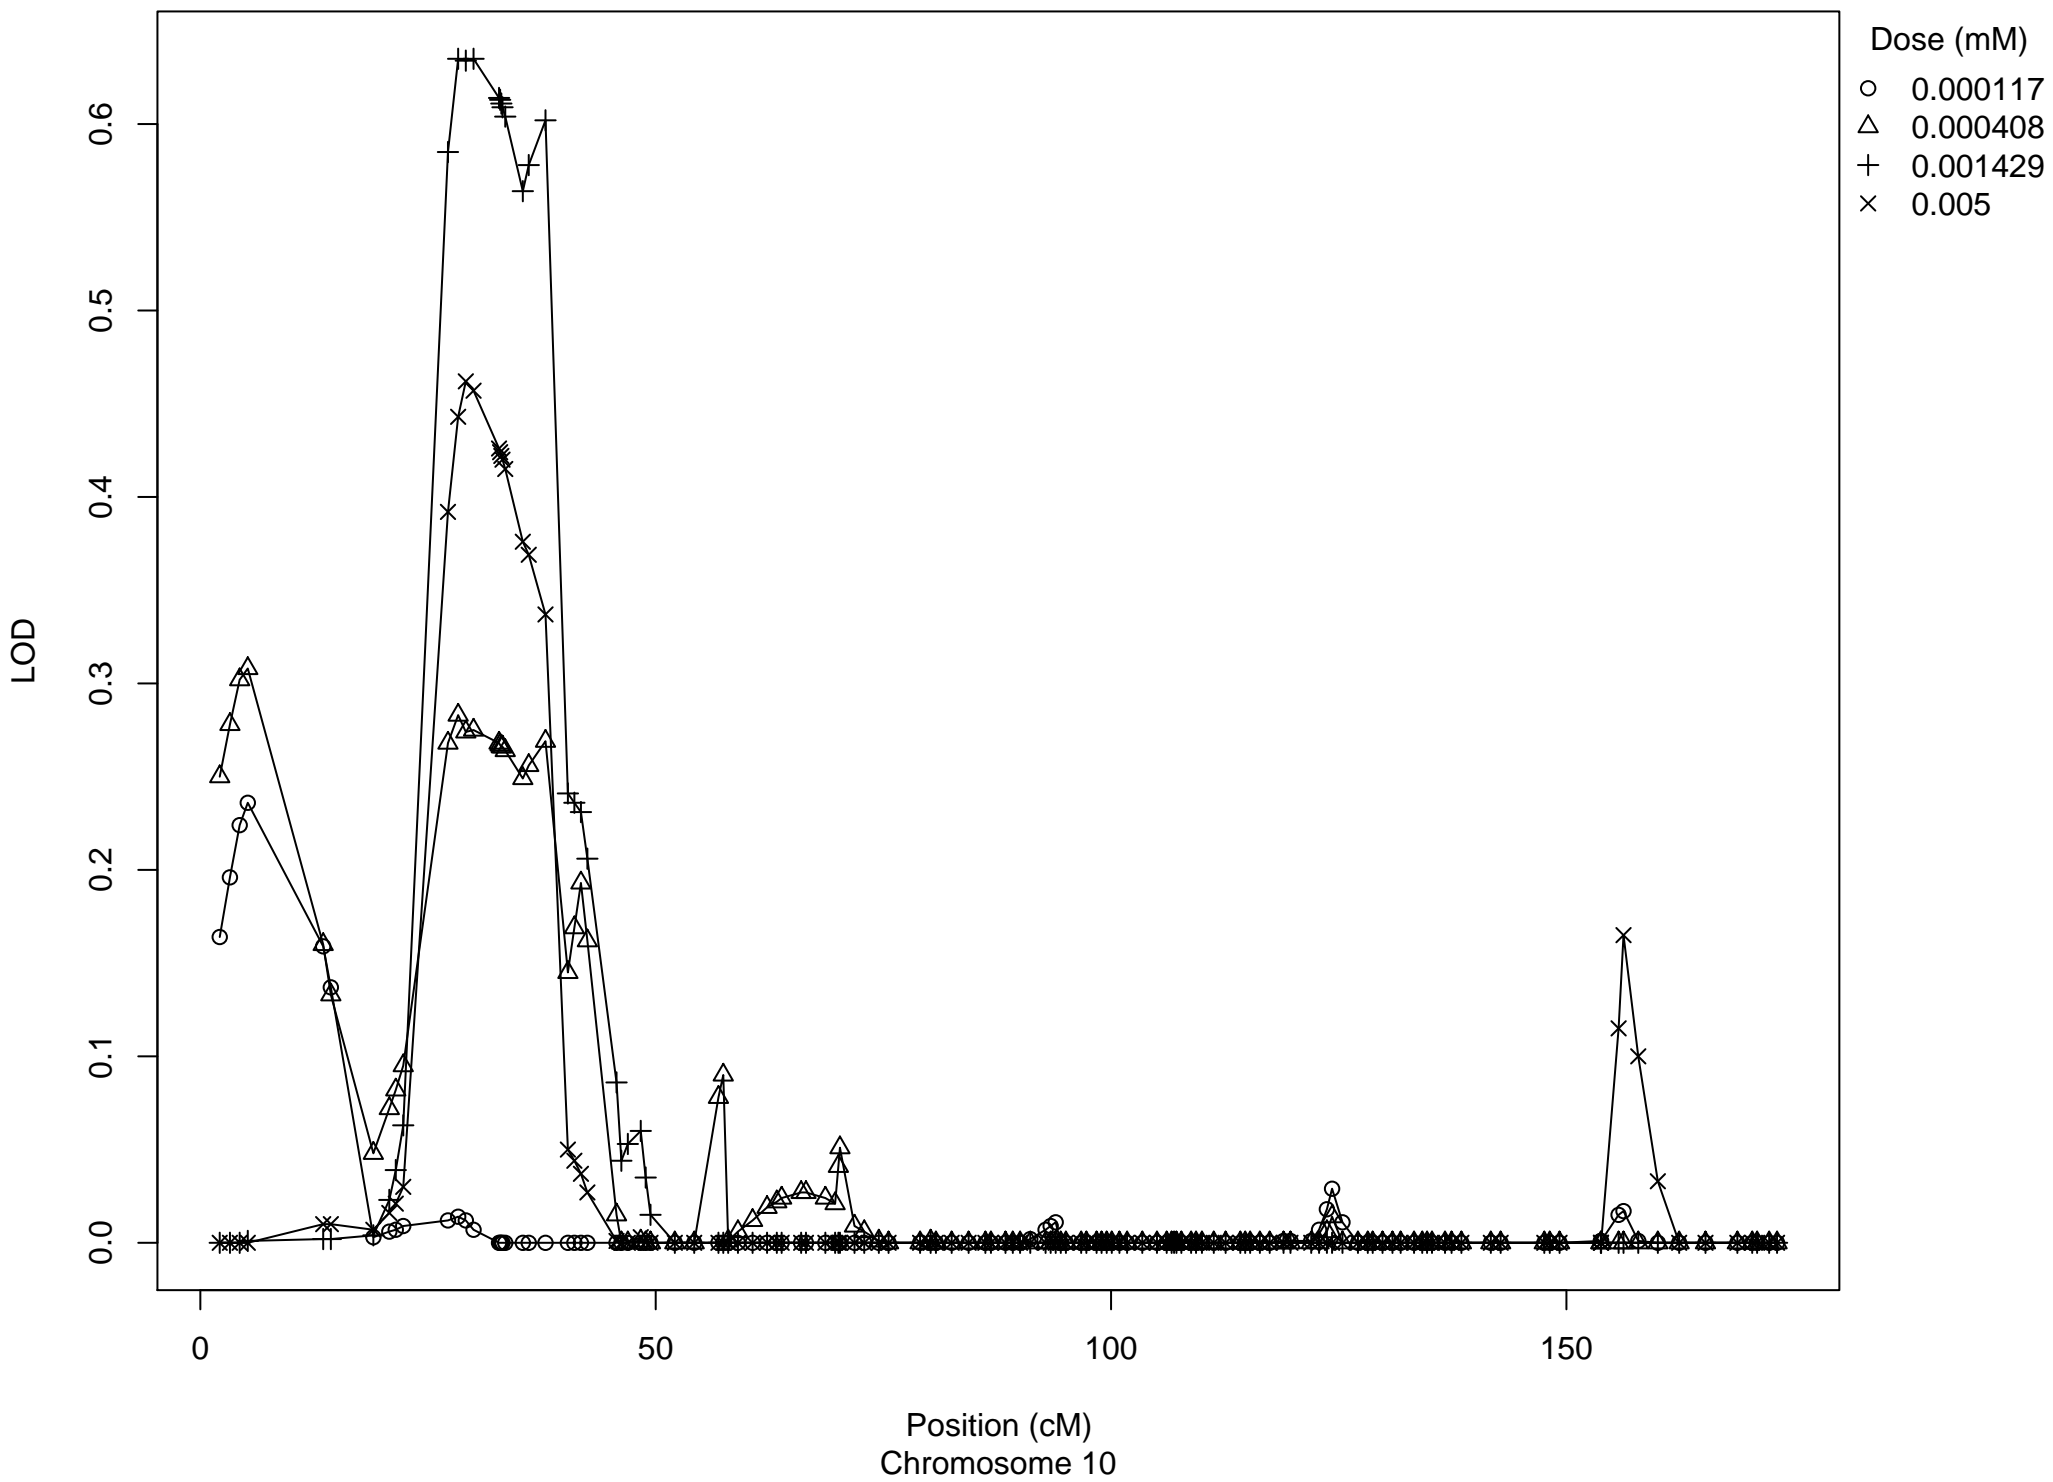

# Etoposide (Etop)

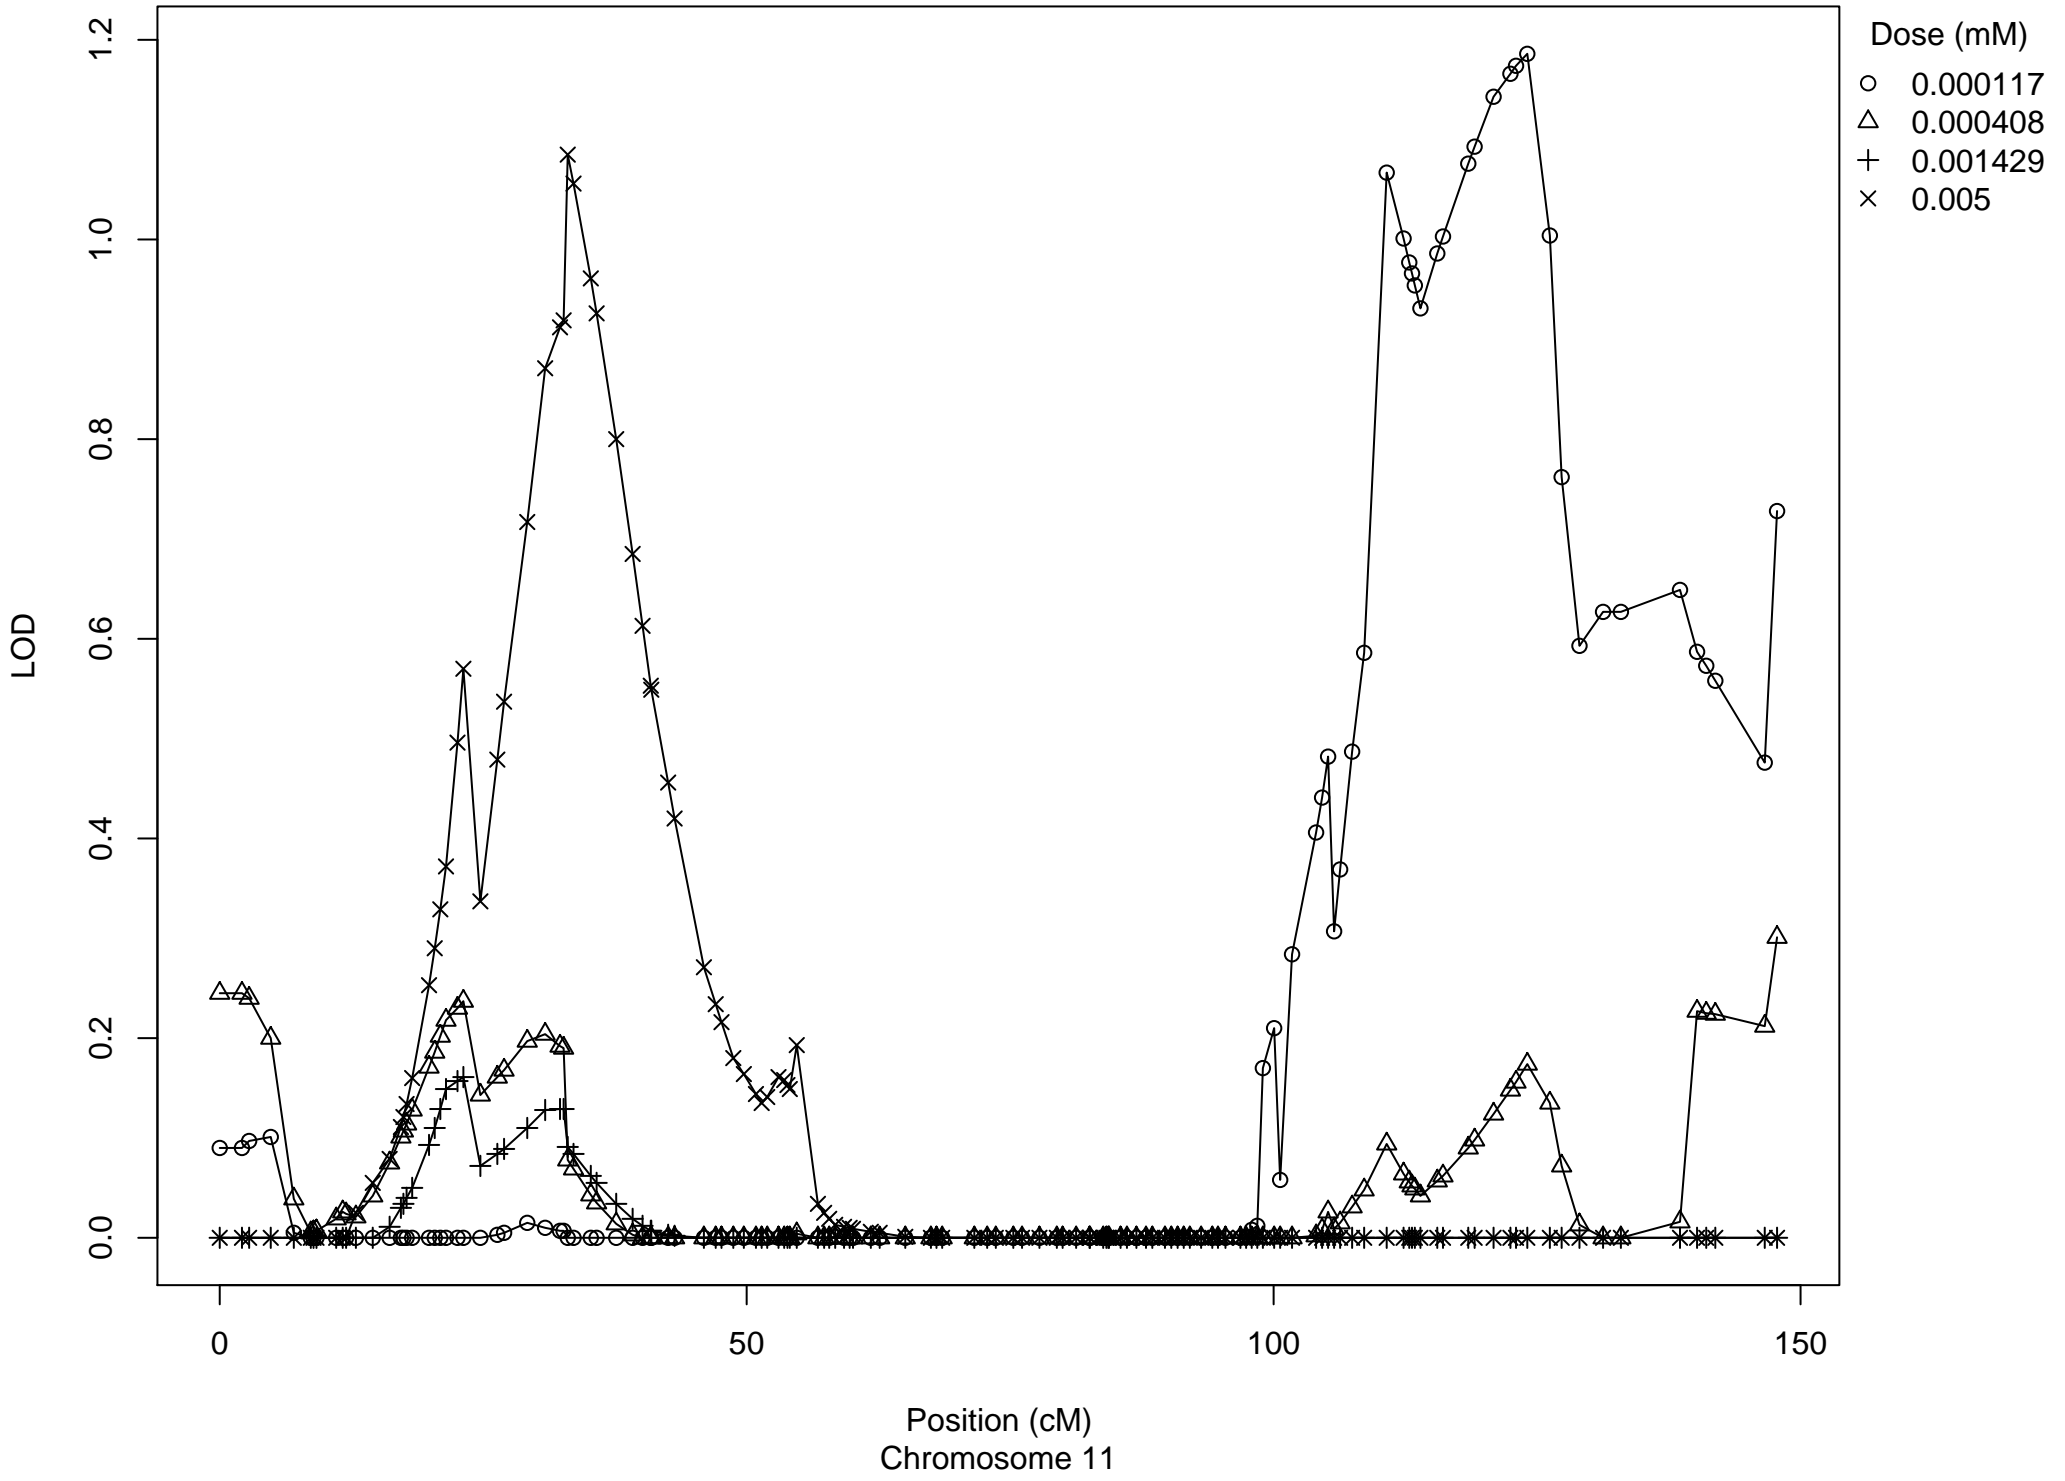

# Etoposide (Etop)

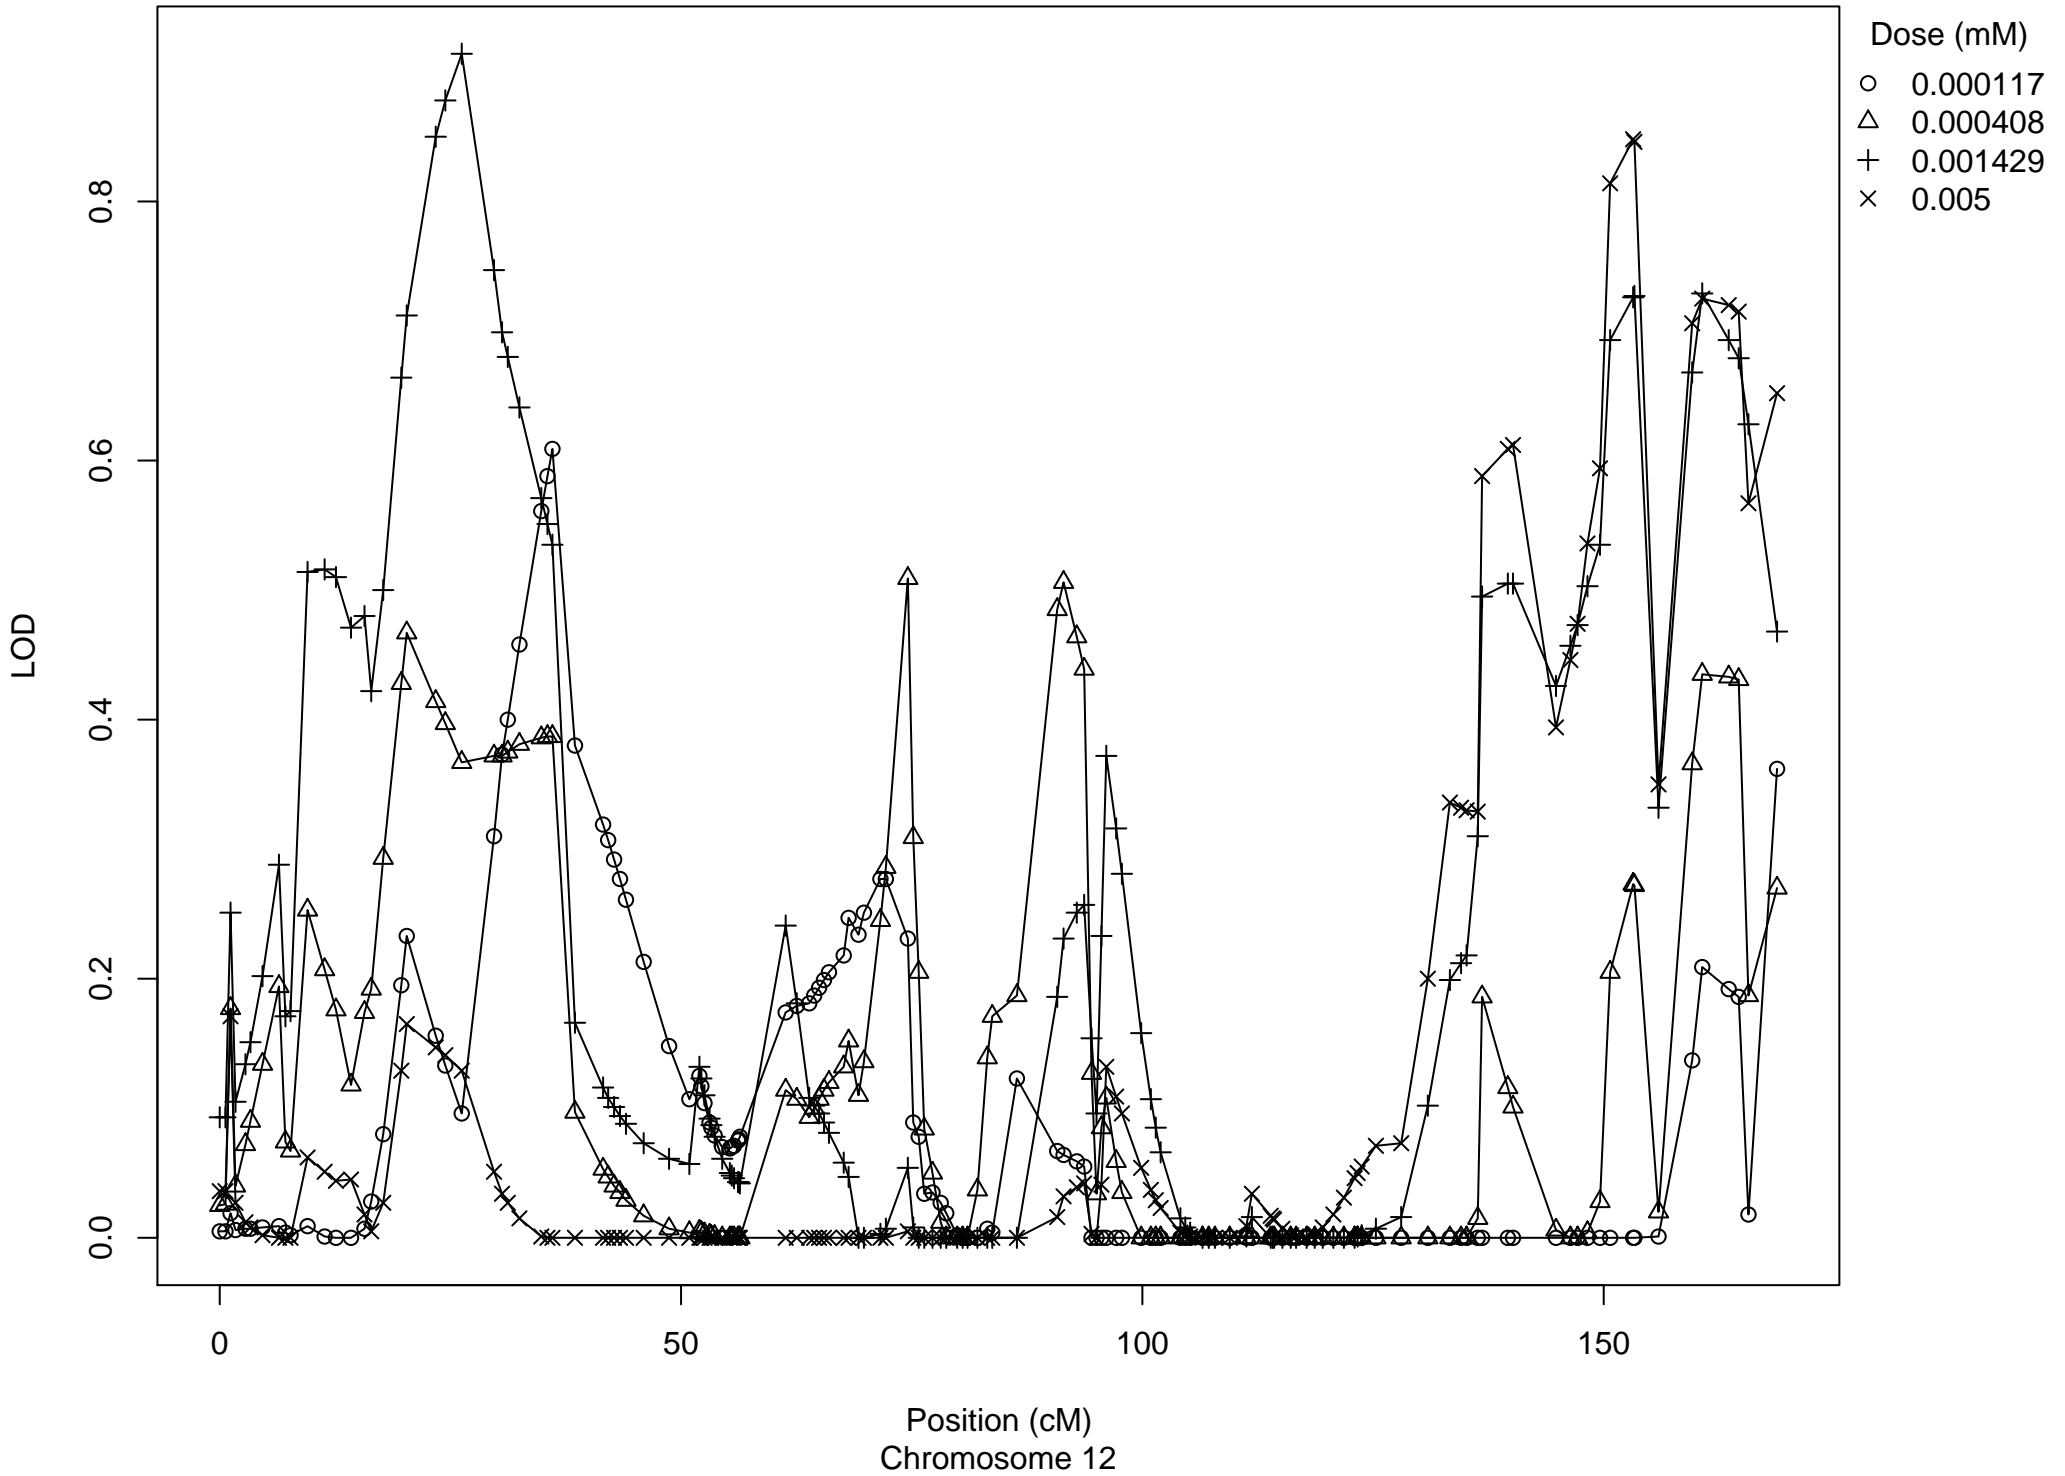



# Etoposide (Etop)

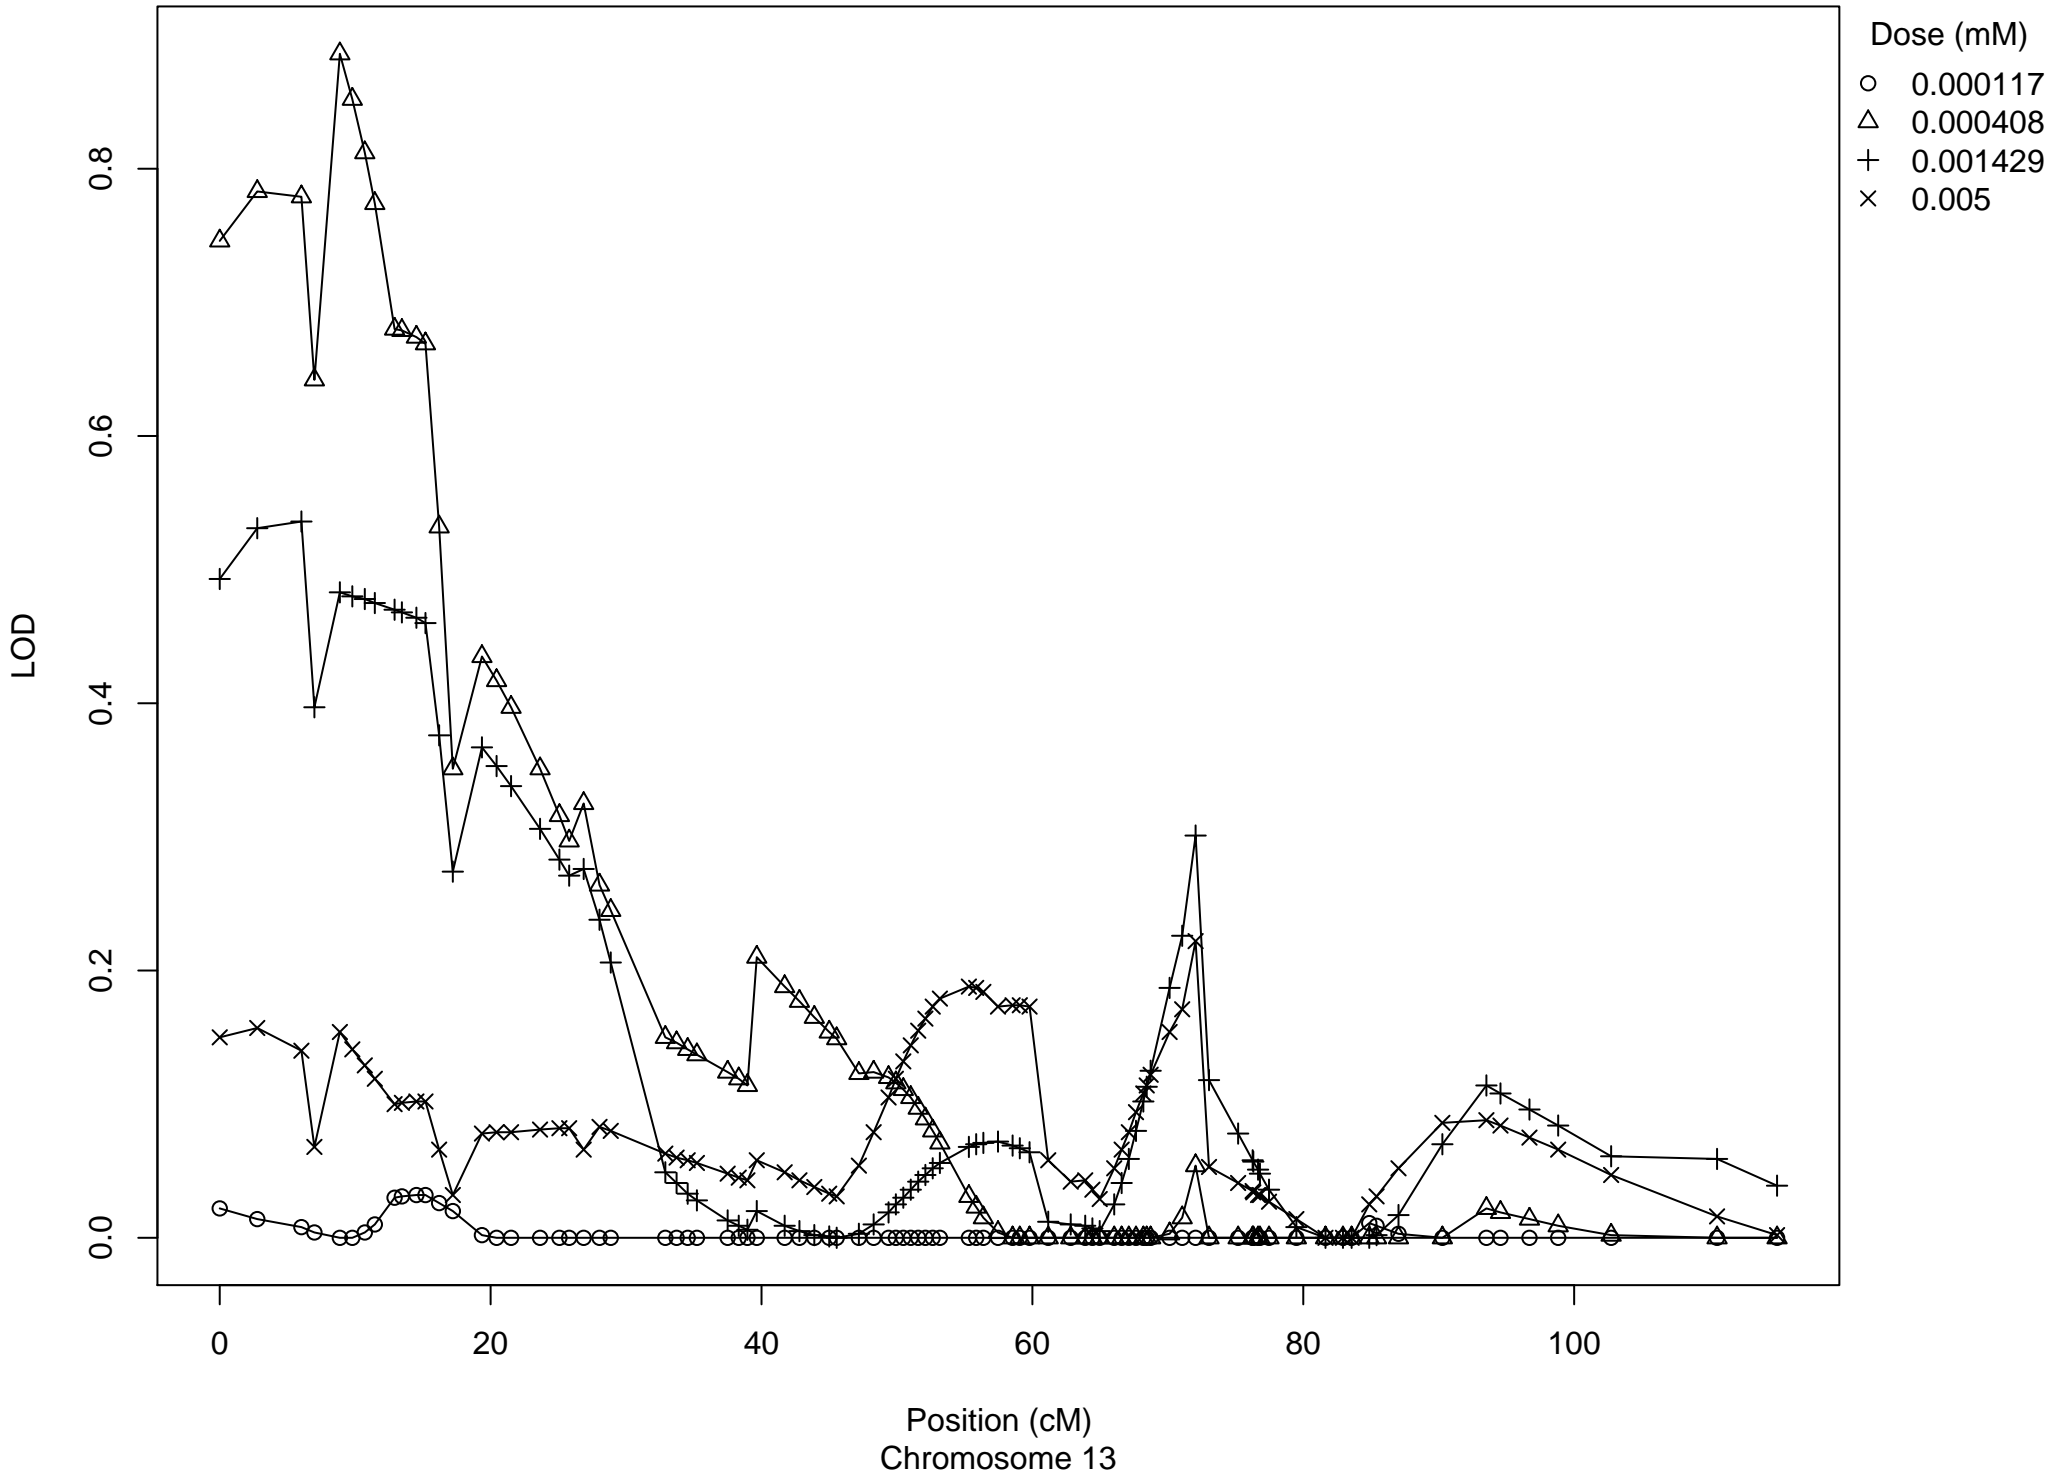

# Etoposide (Etop)

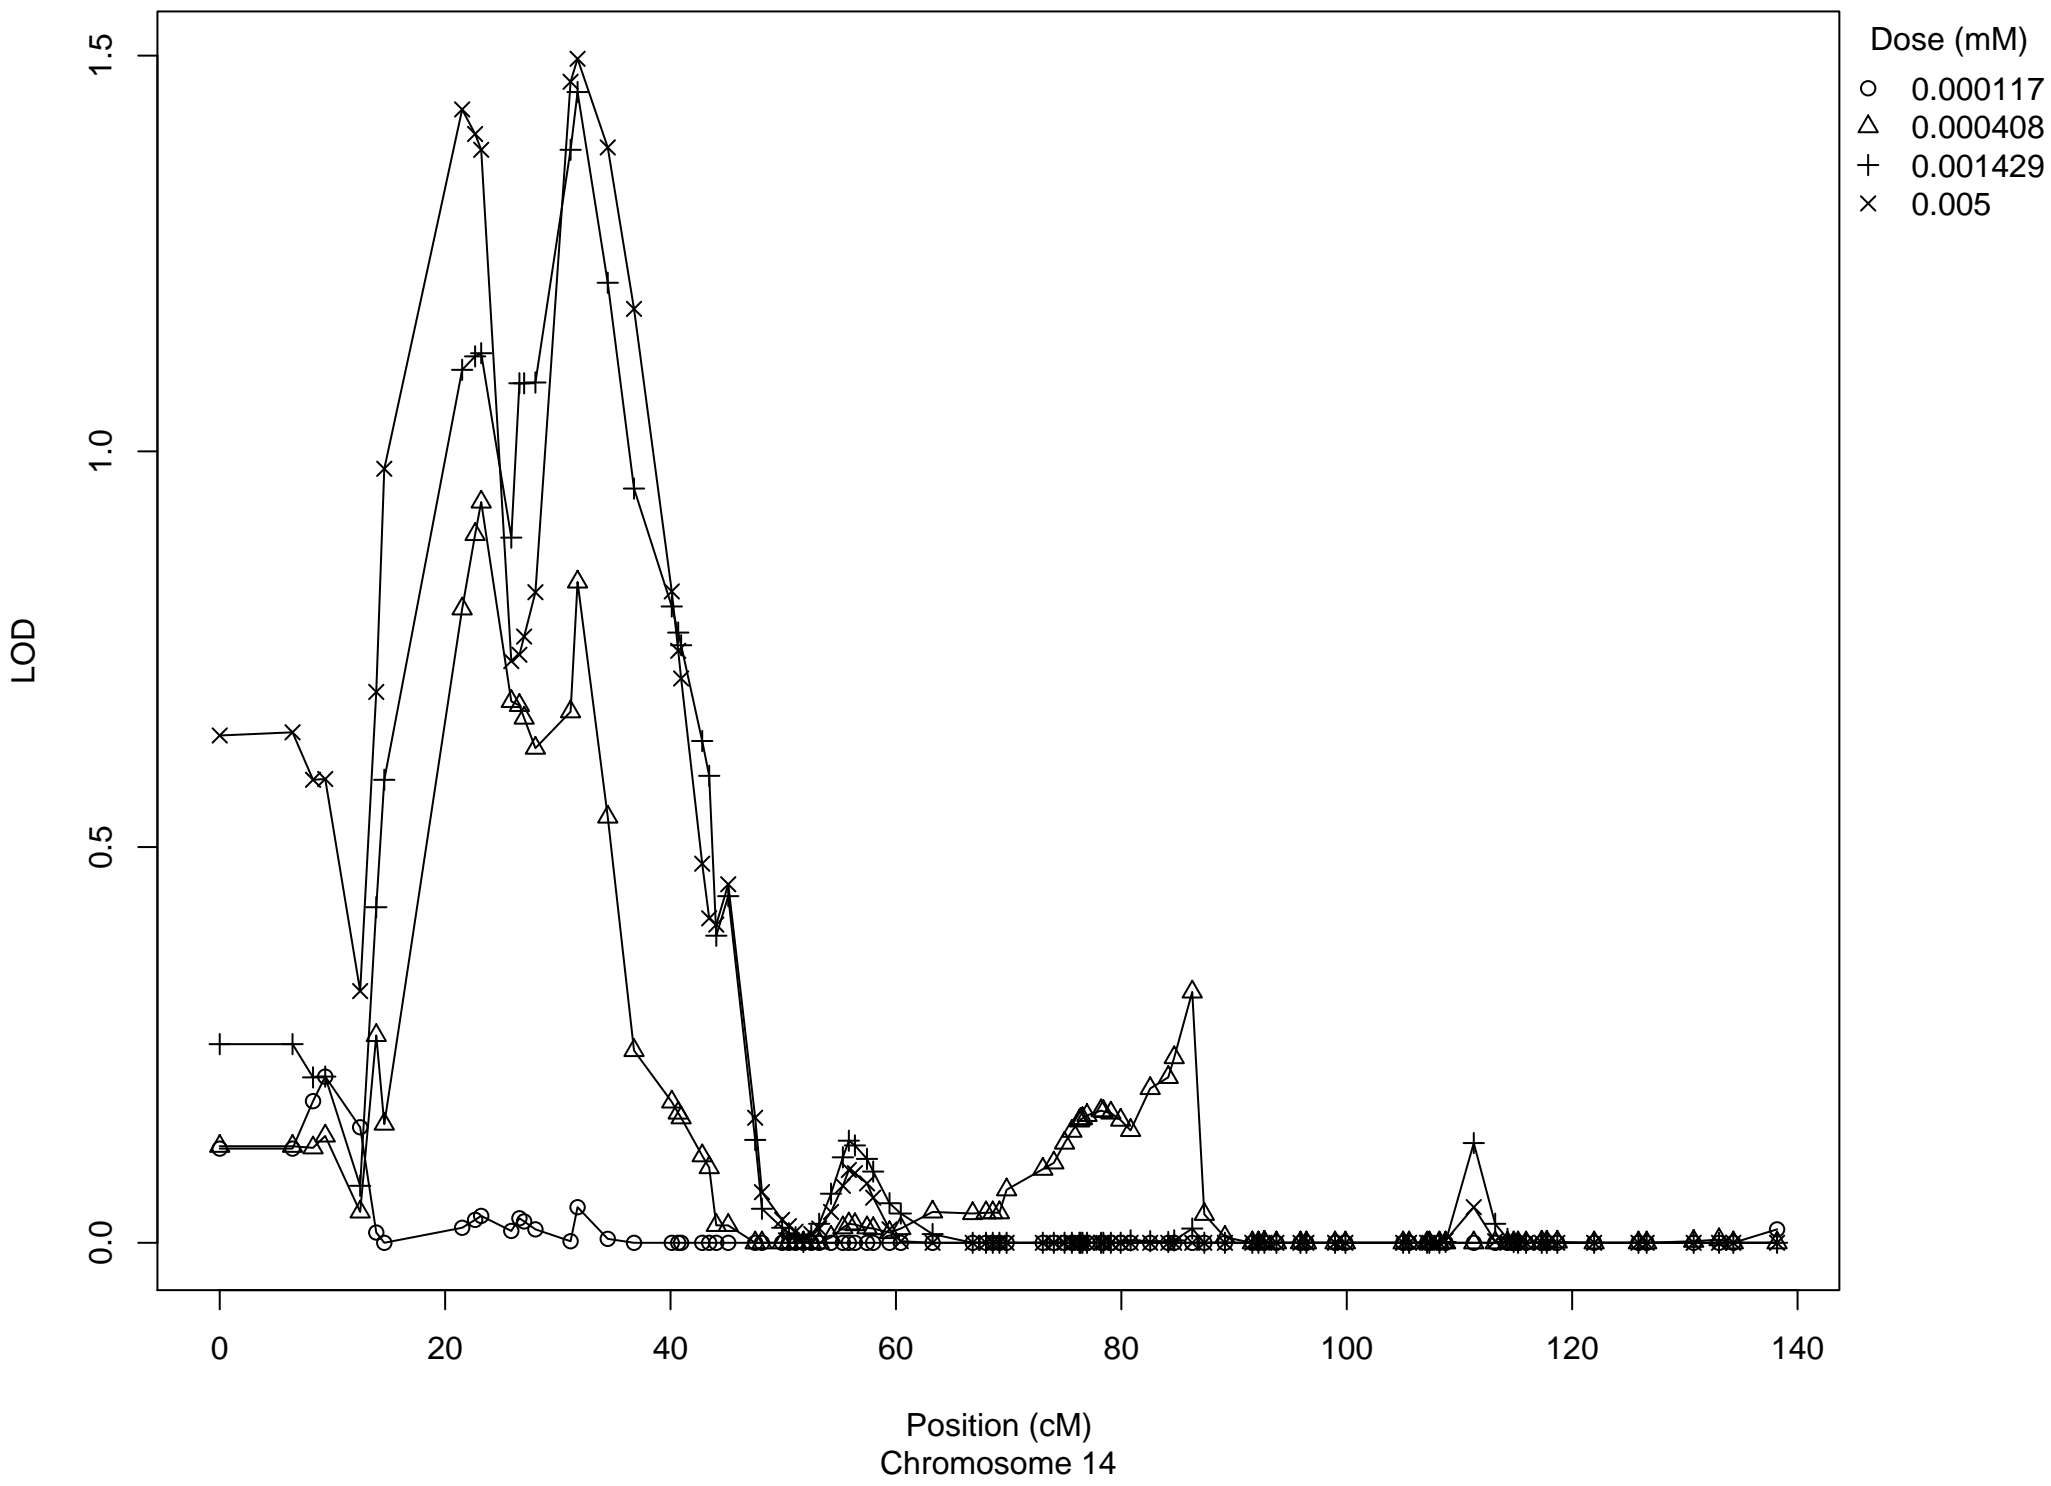

# Etoposide (Etop)

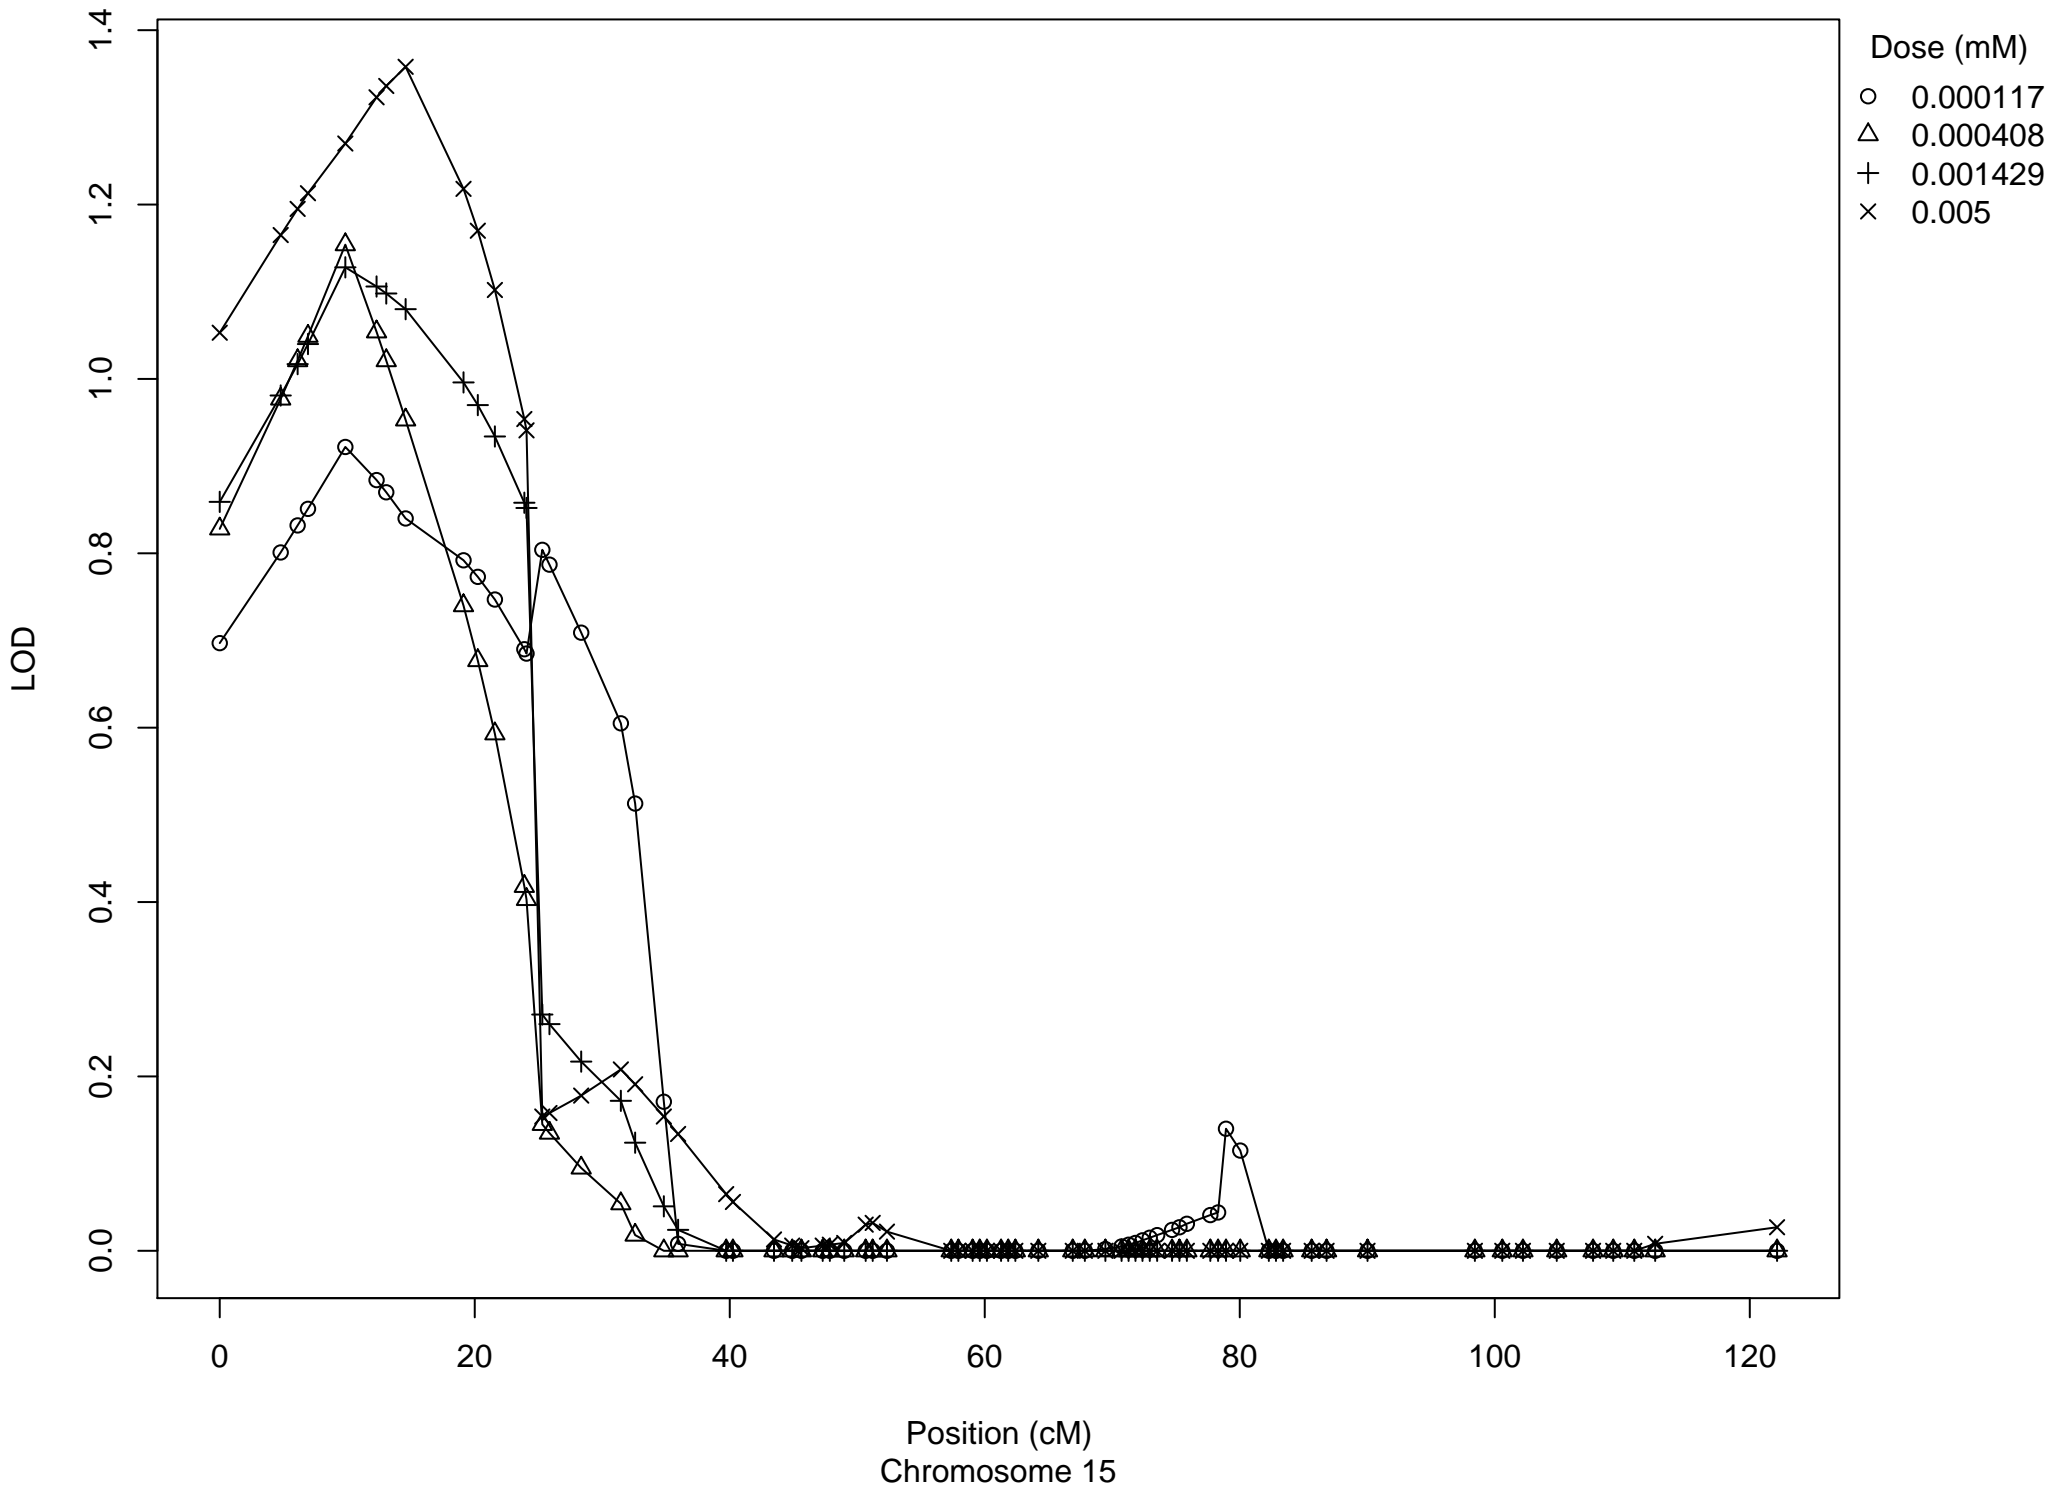

# Etoposide (Etop)

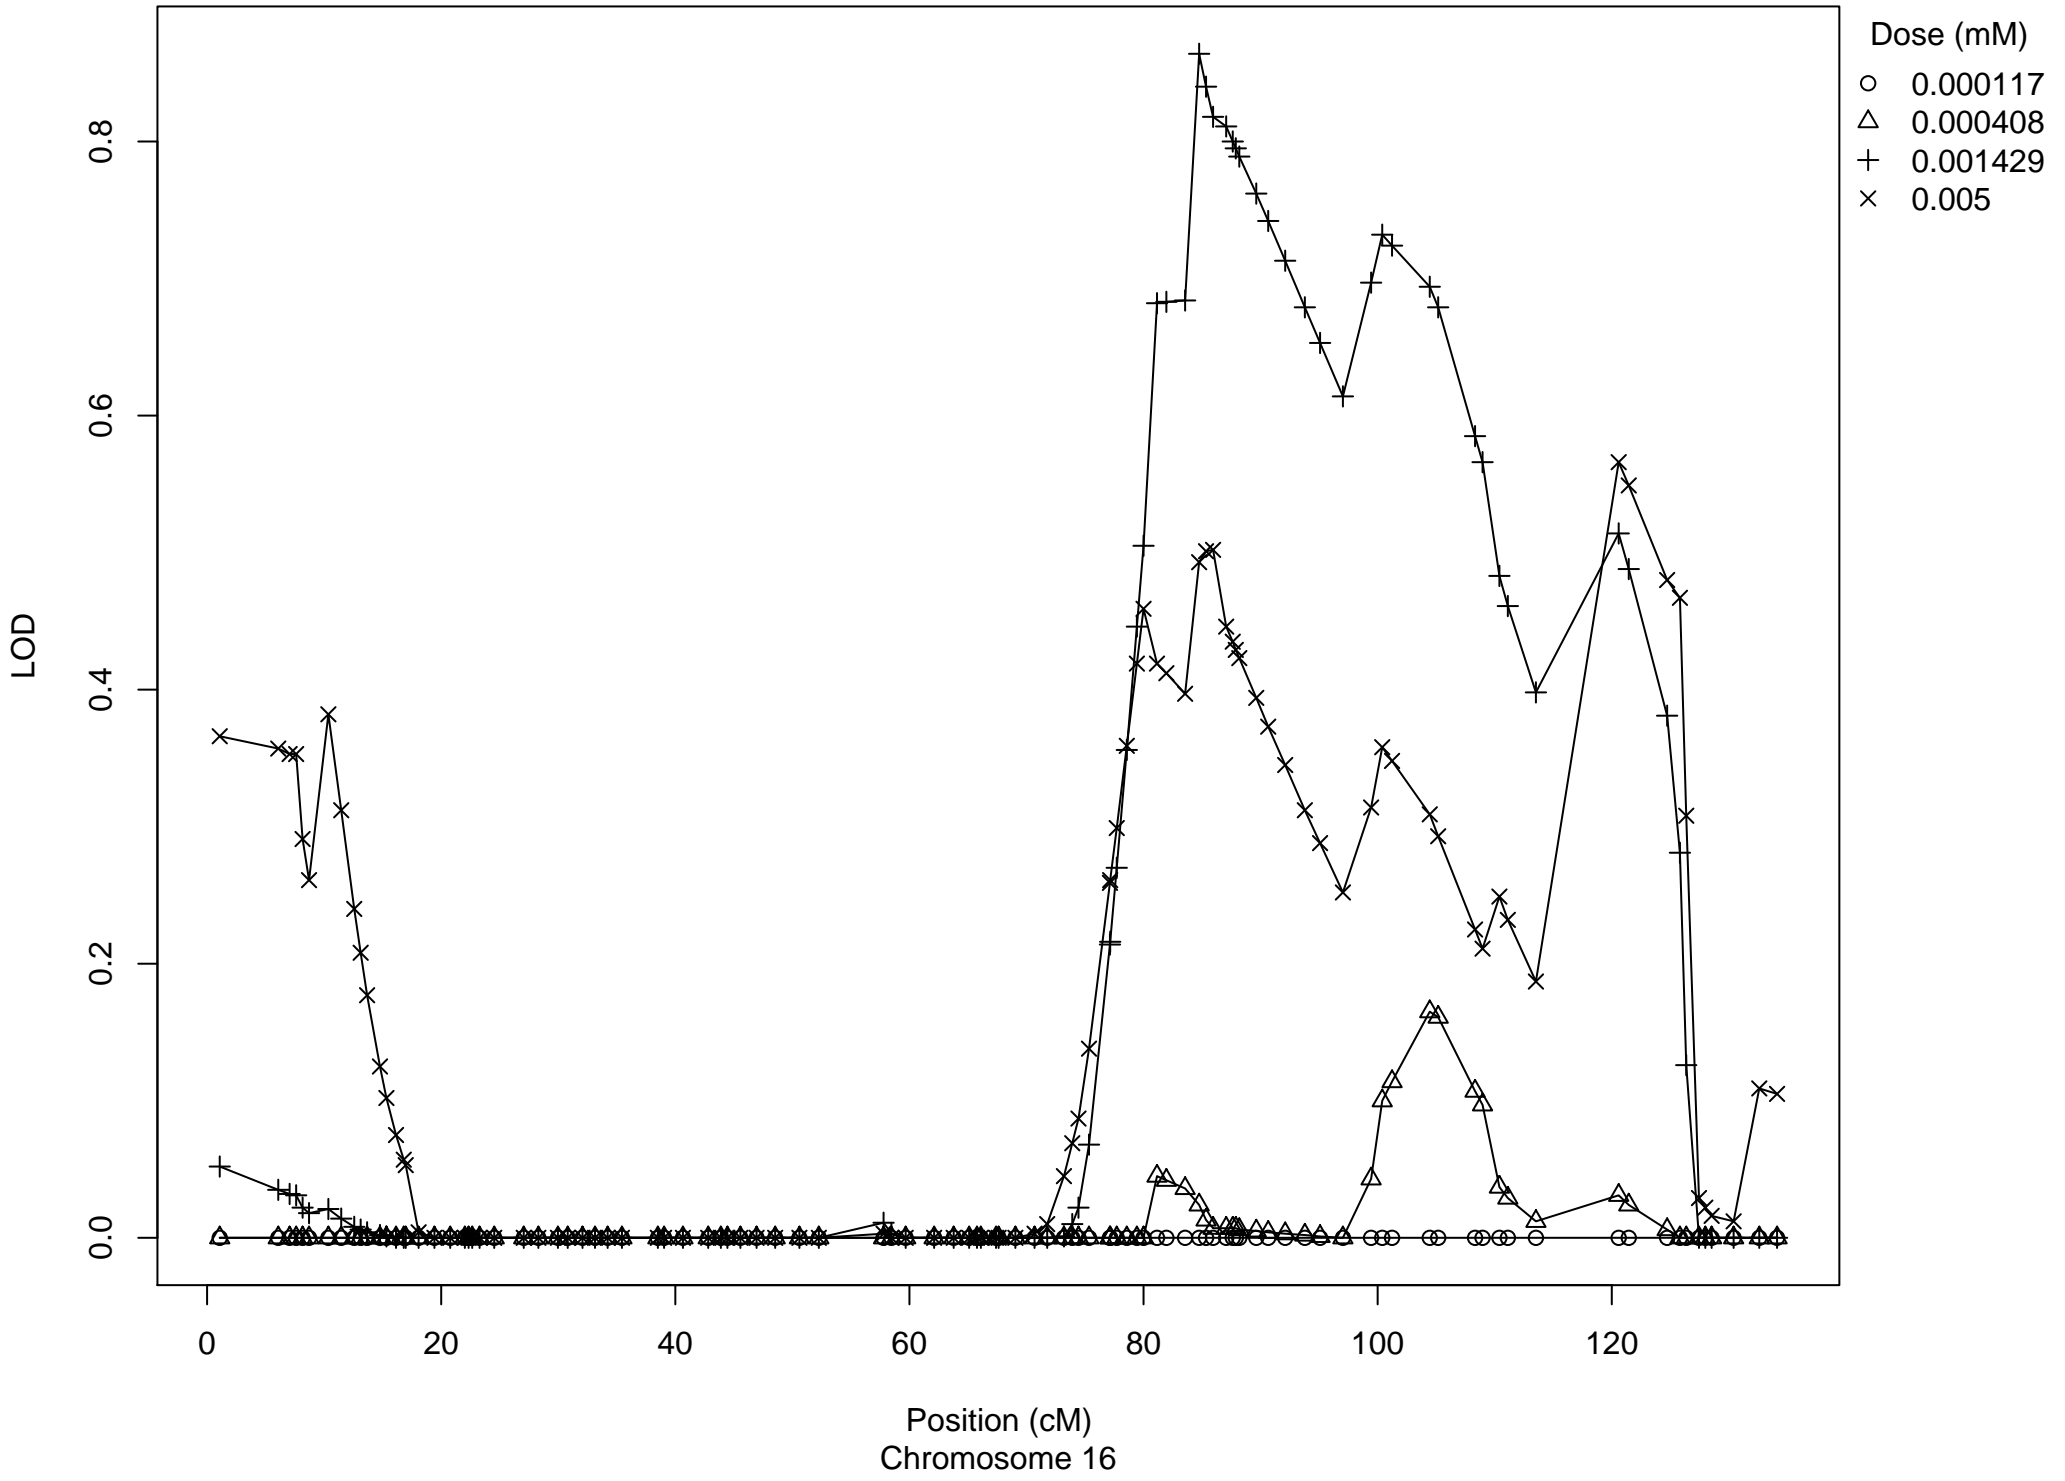

# Etoposide (Etop)

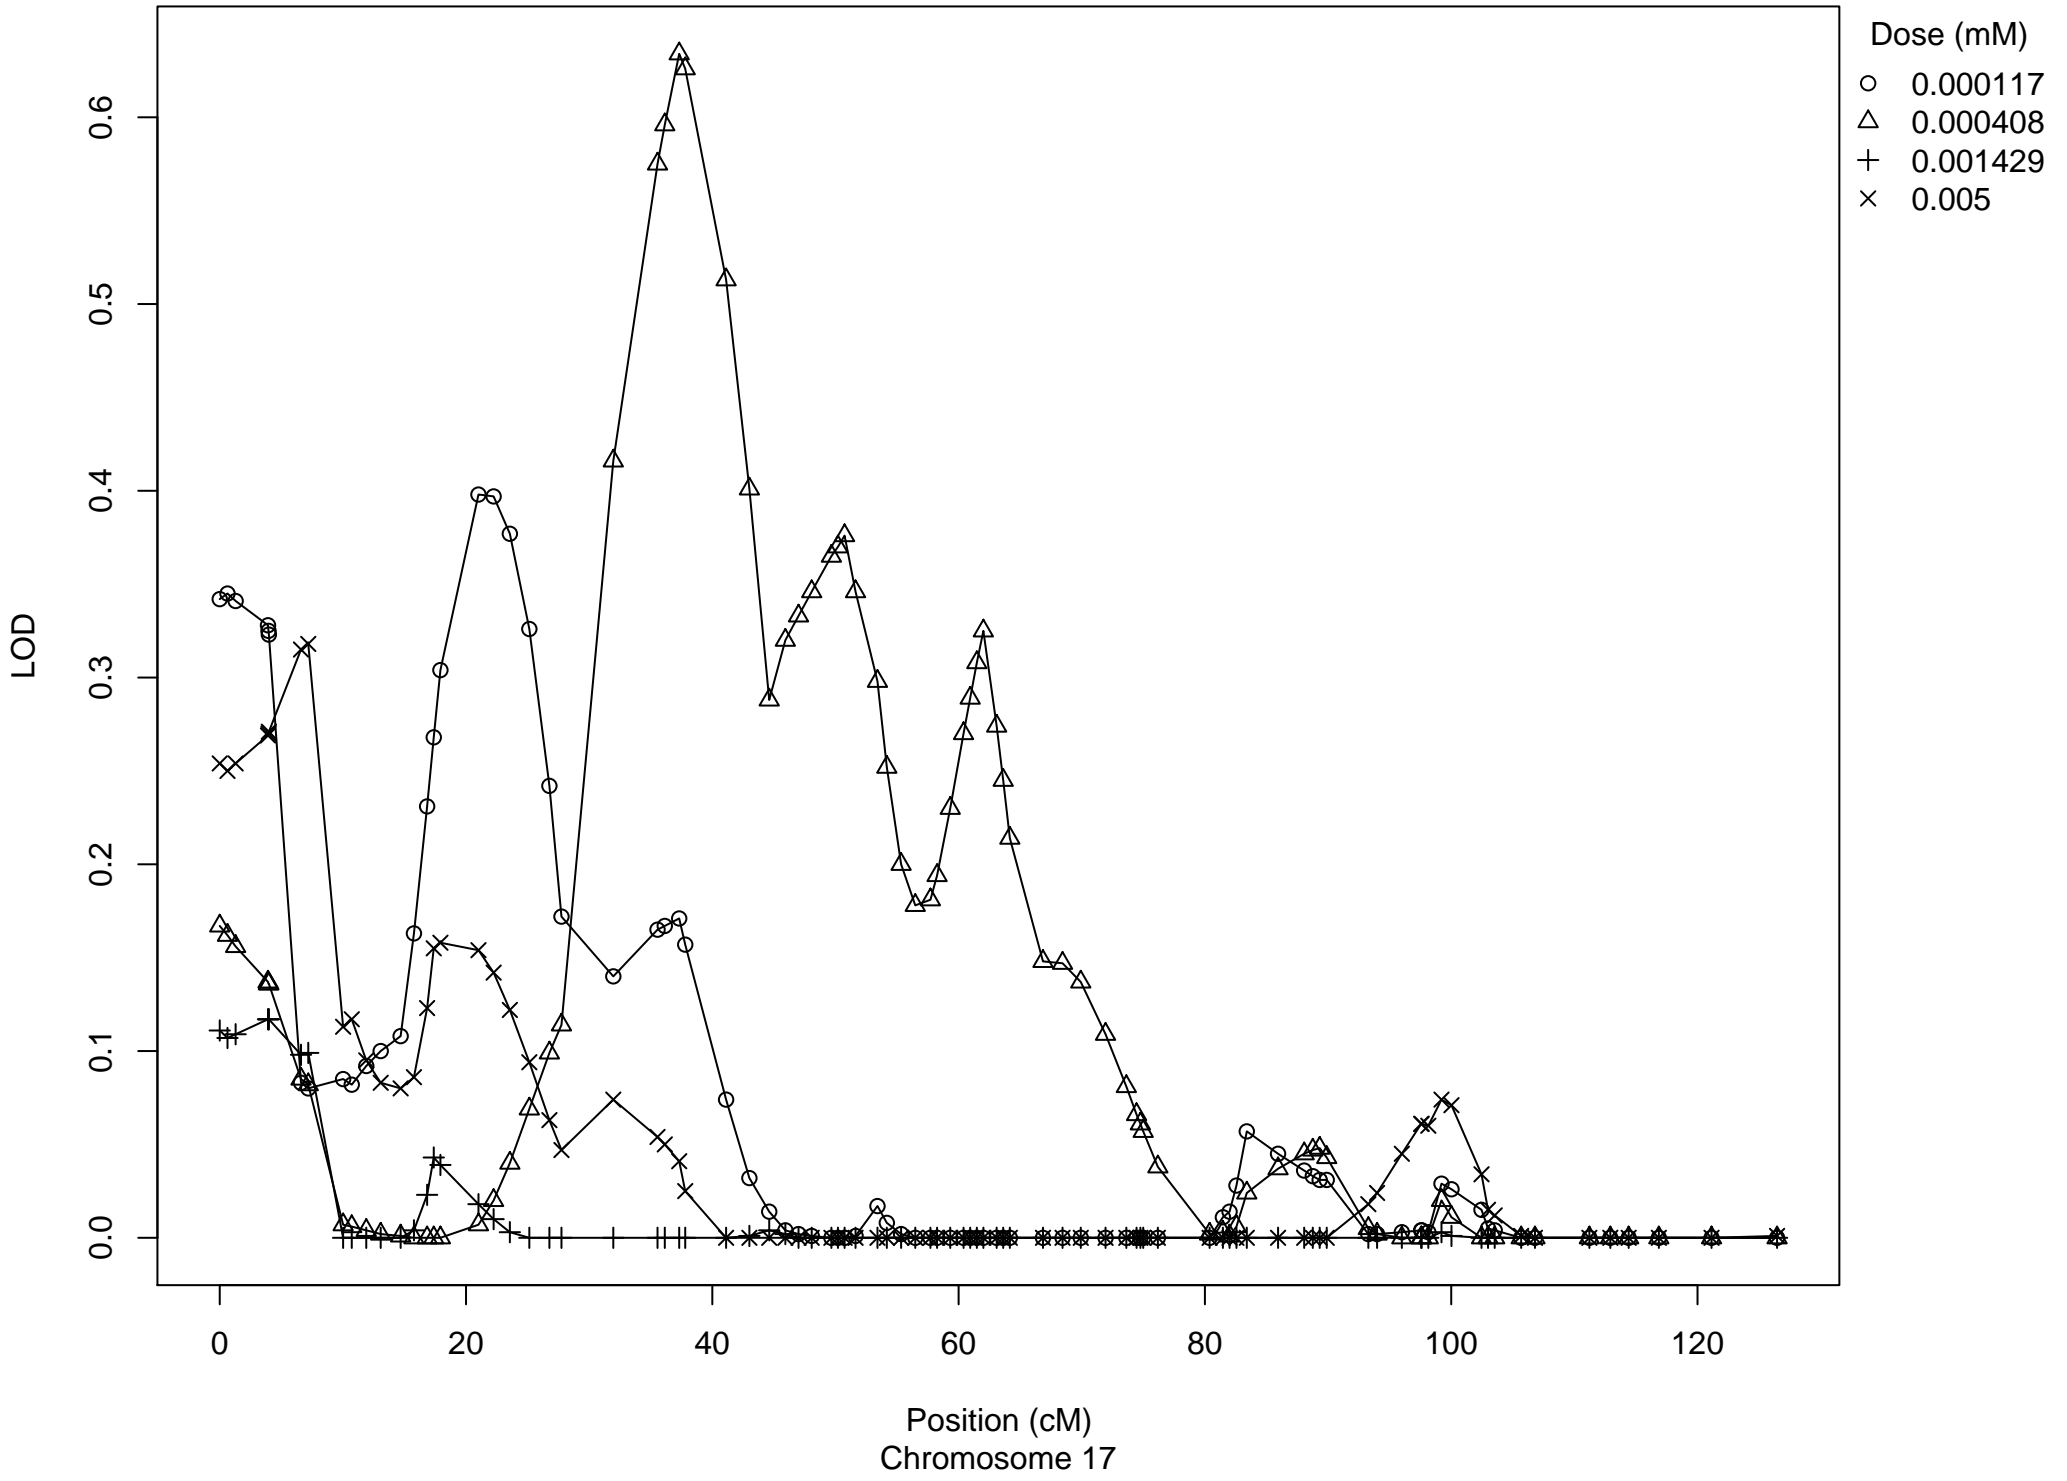

# Etoposide (Etop)

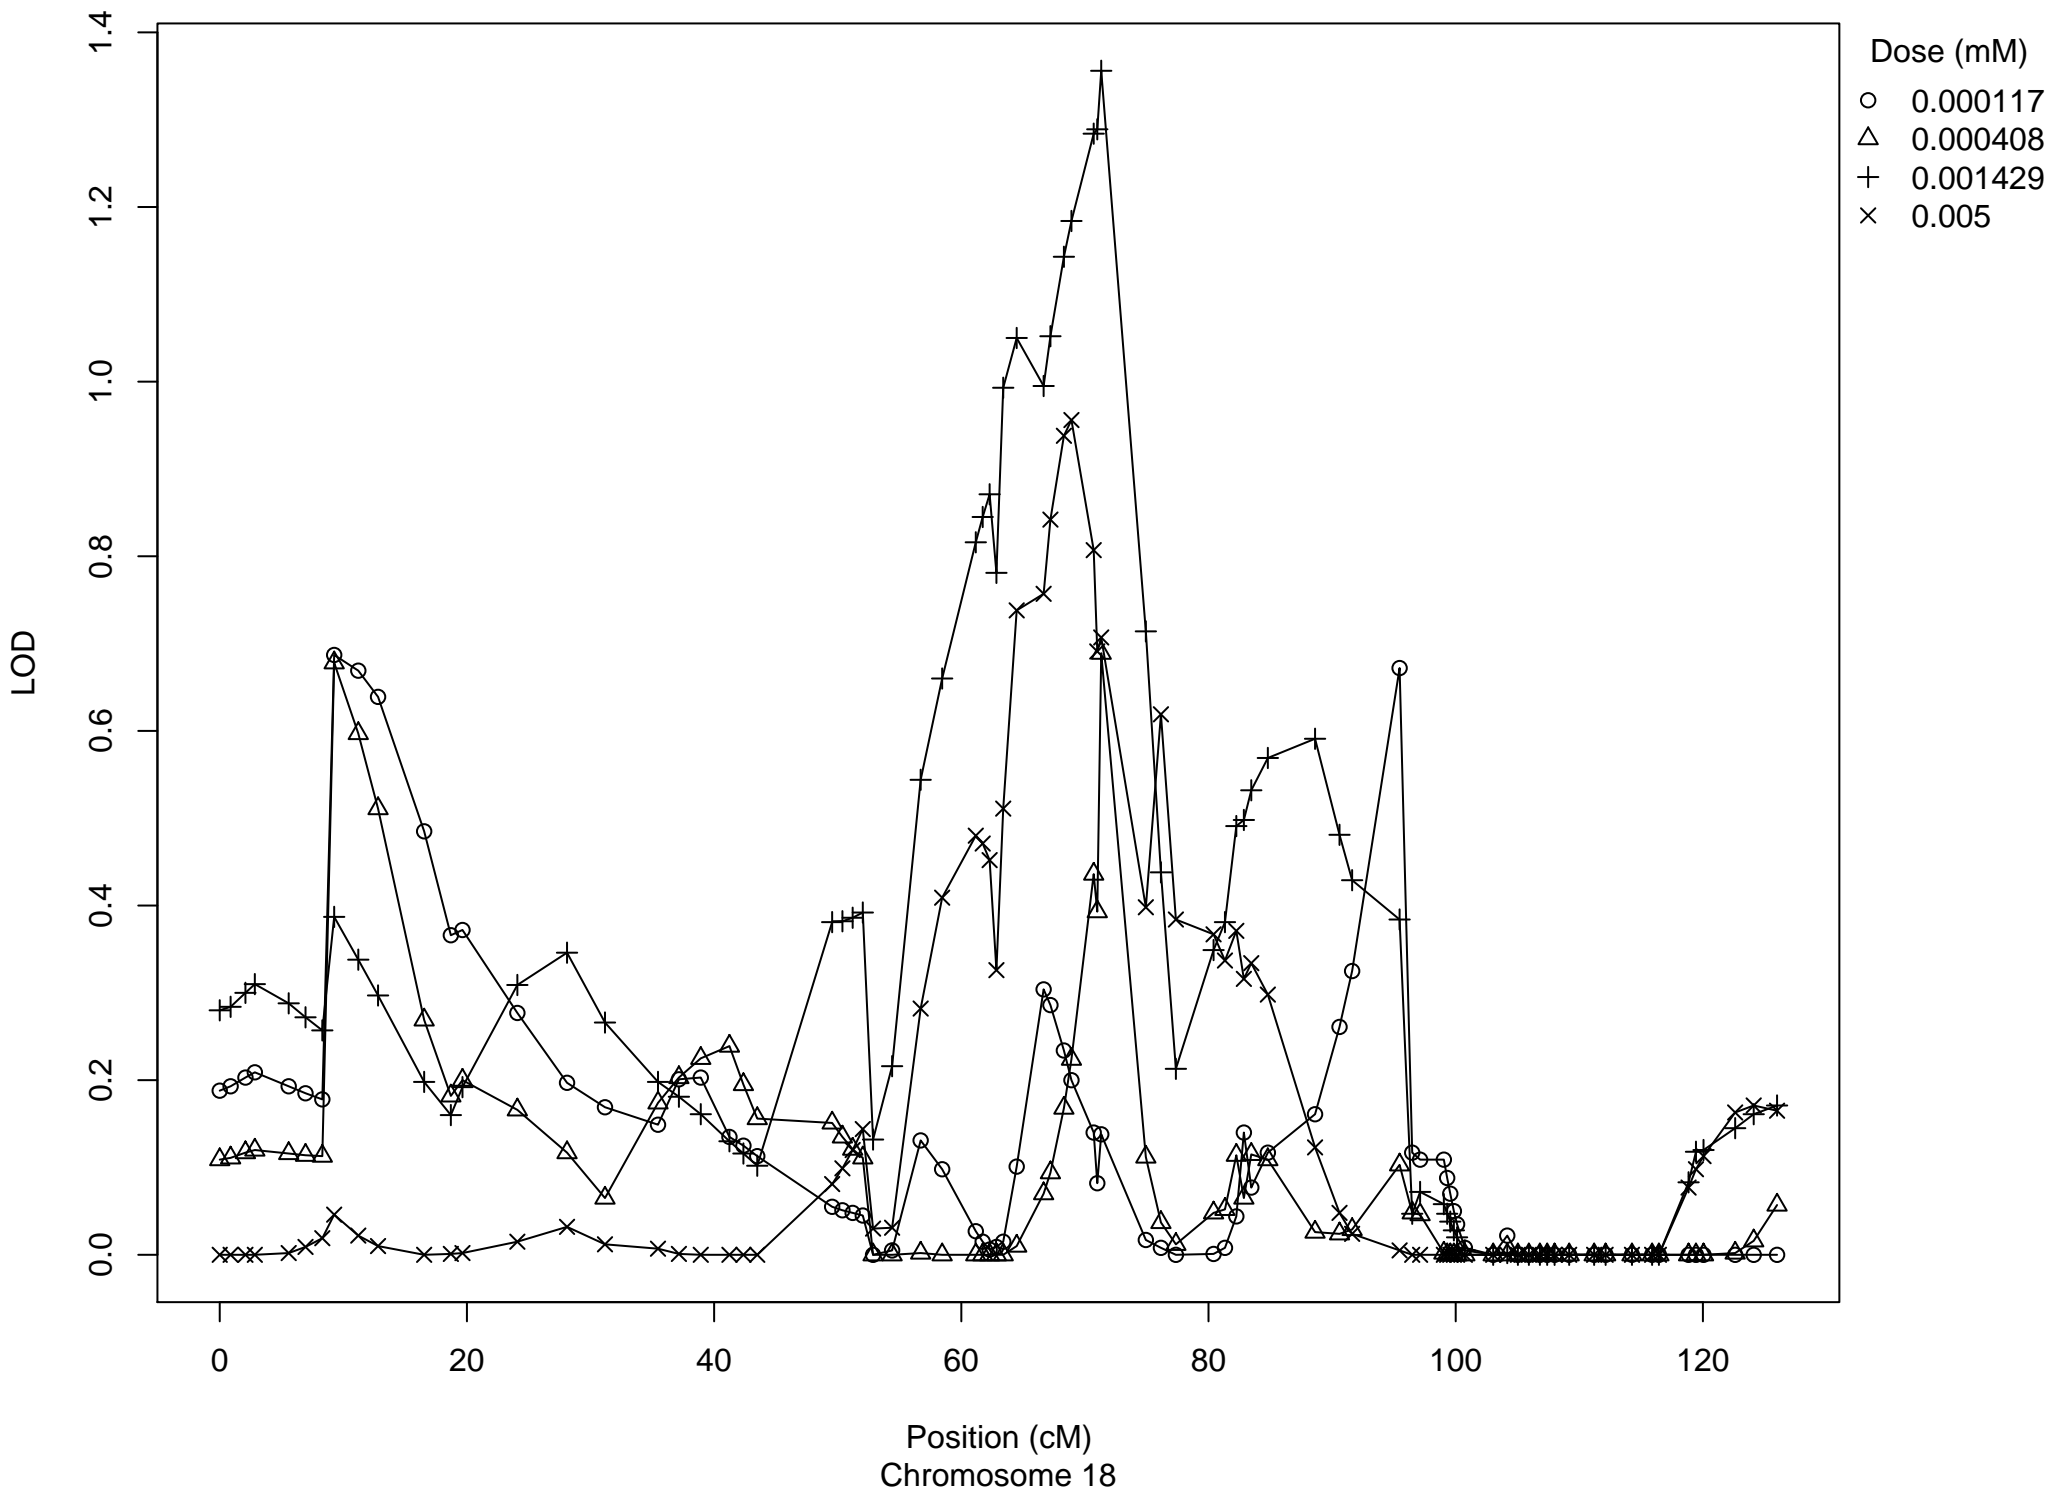

# Etoposide (Etop)

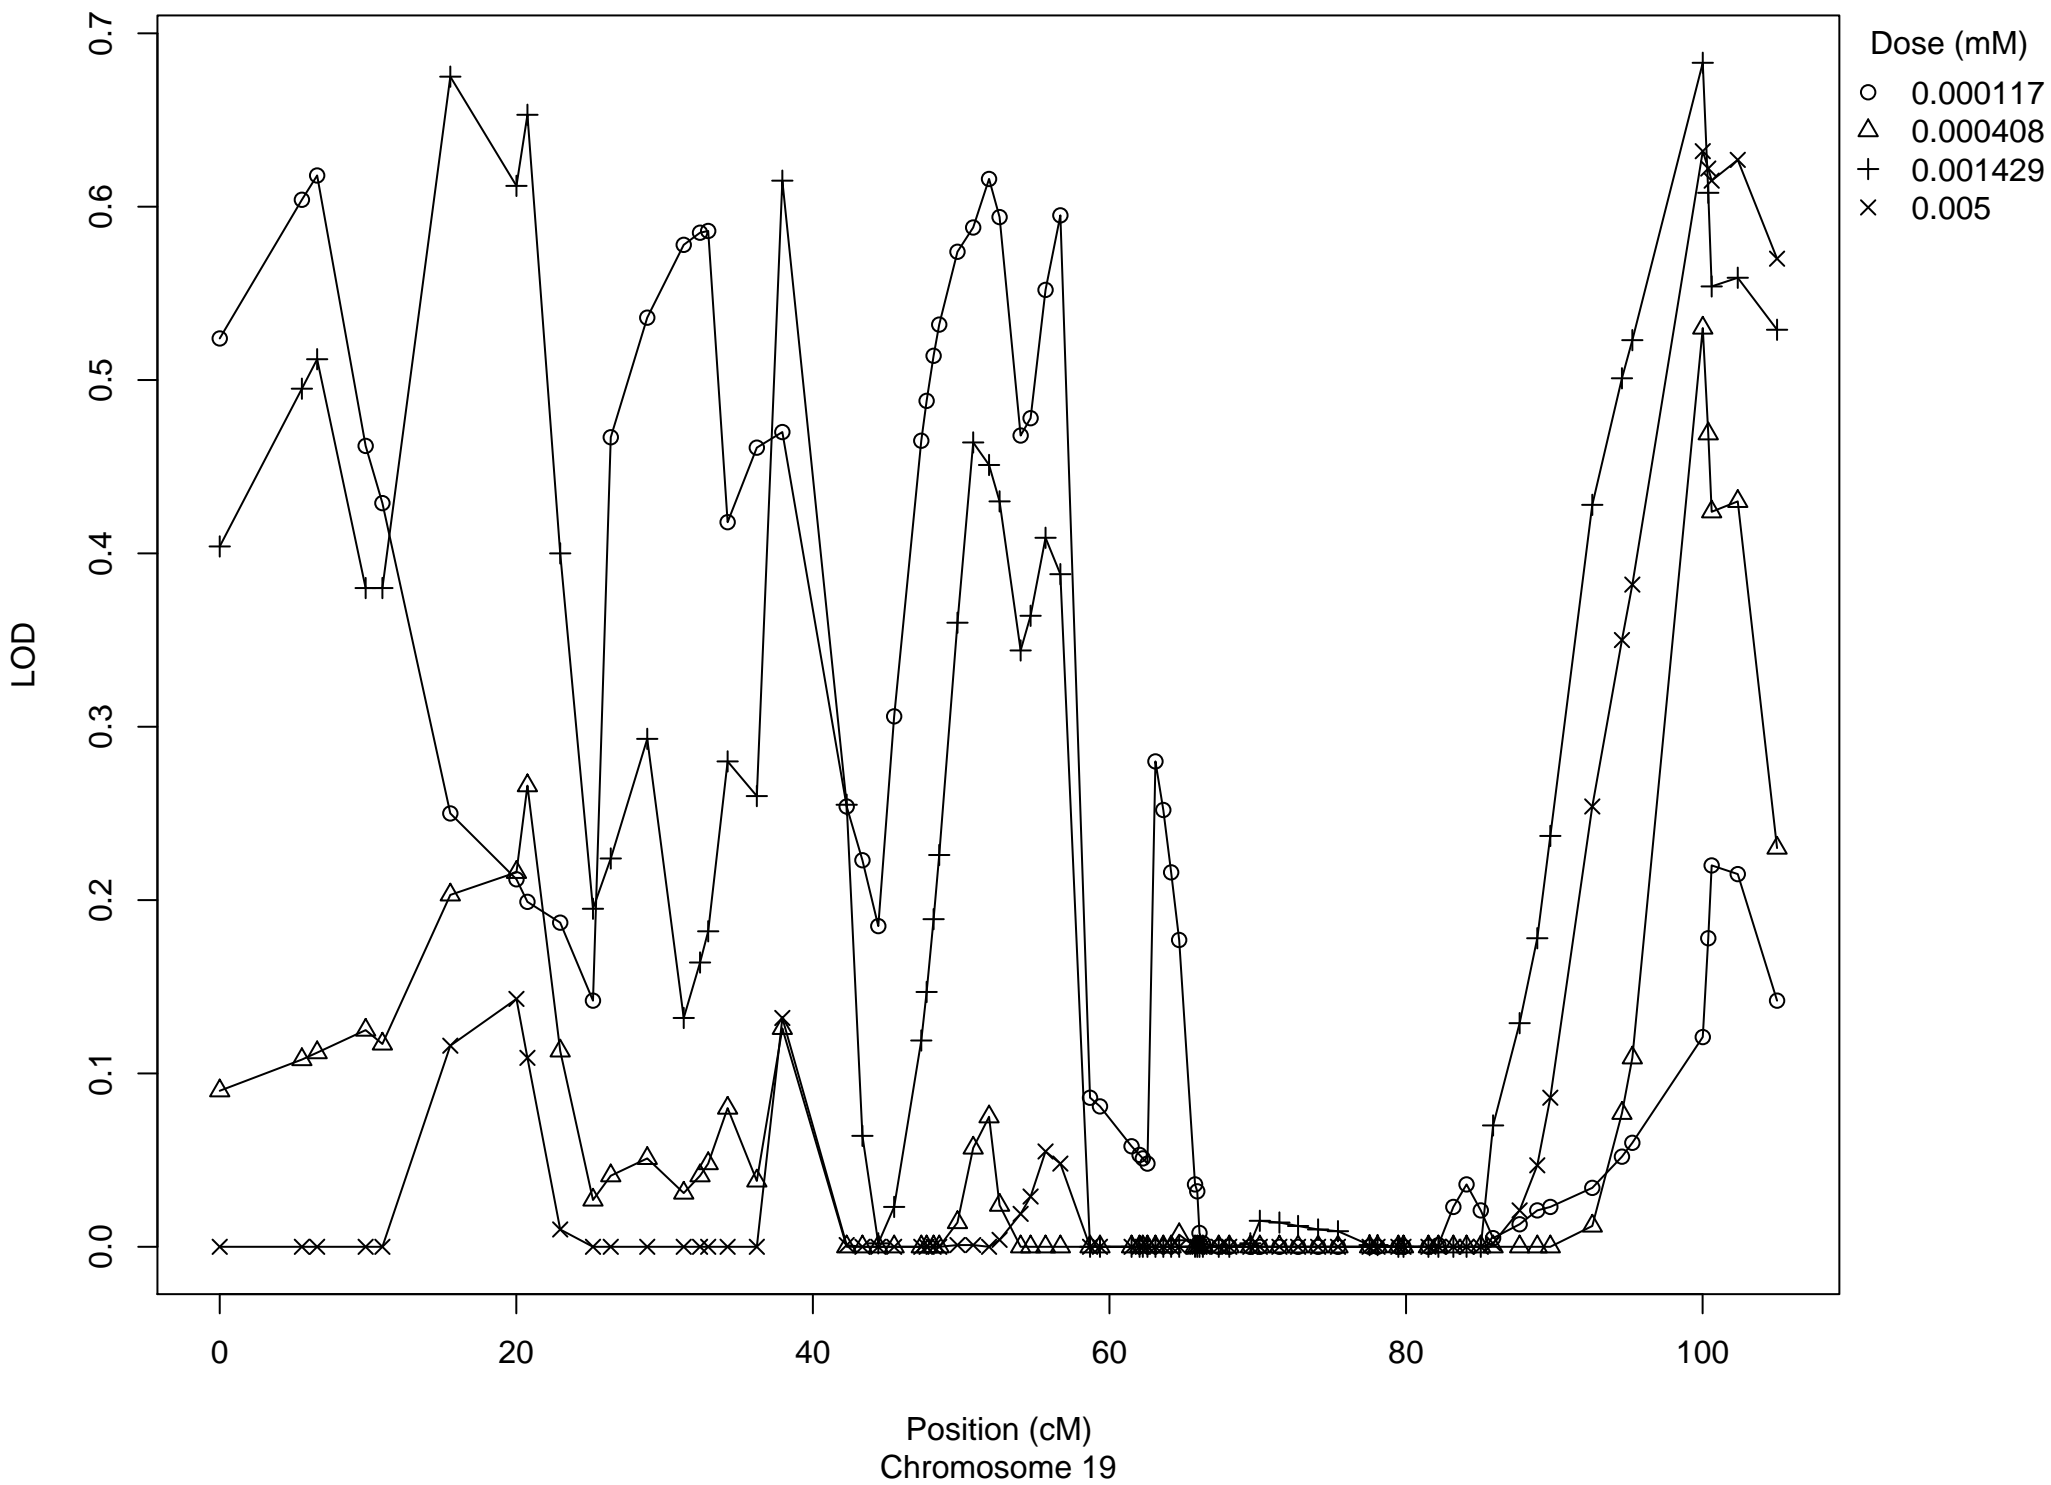

# Etoposide (Etop)

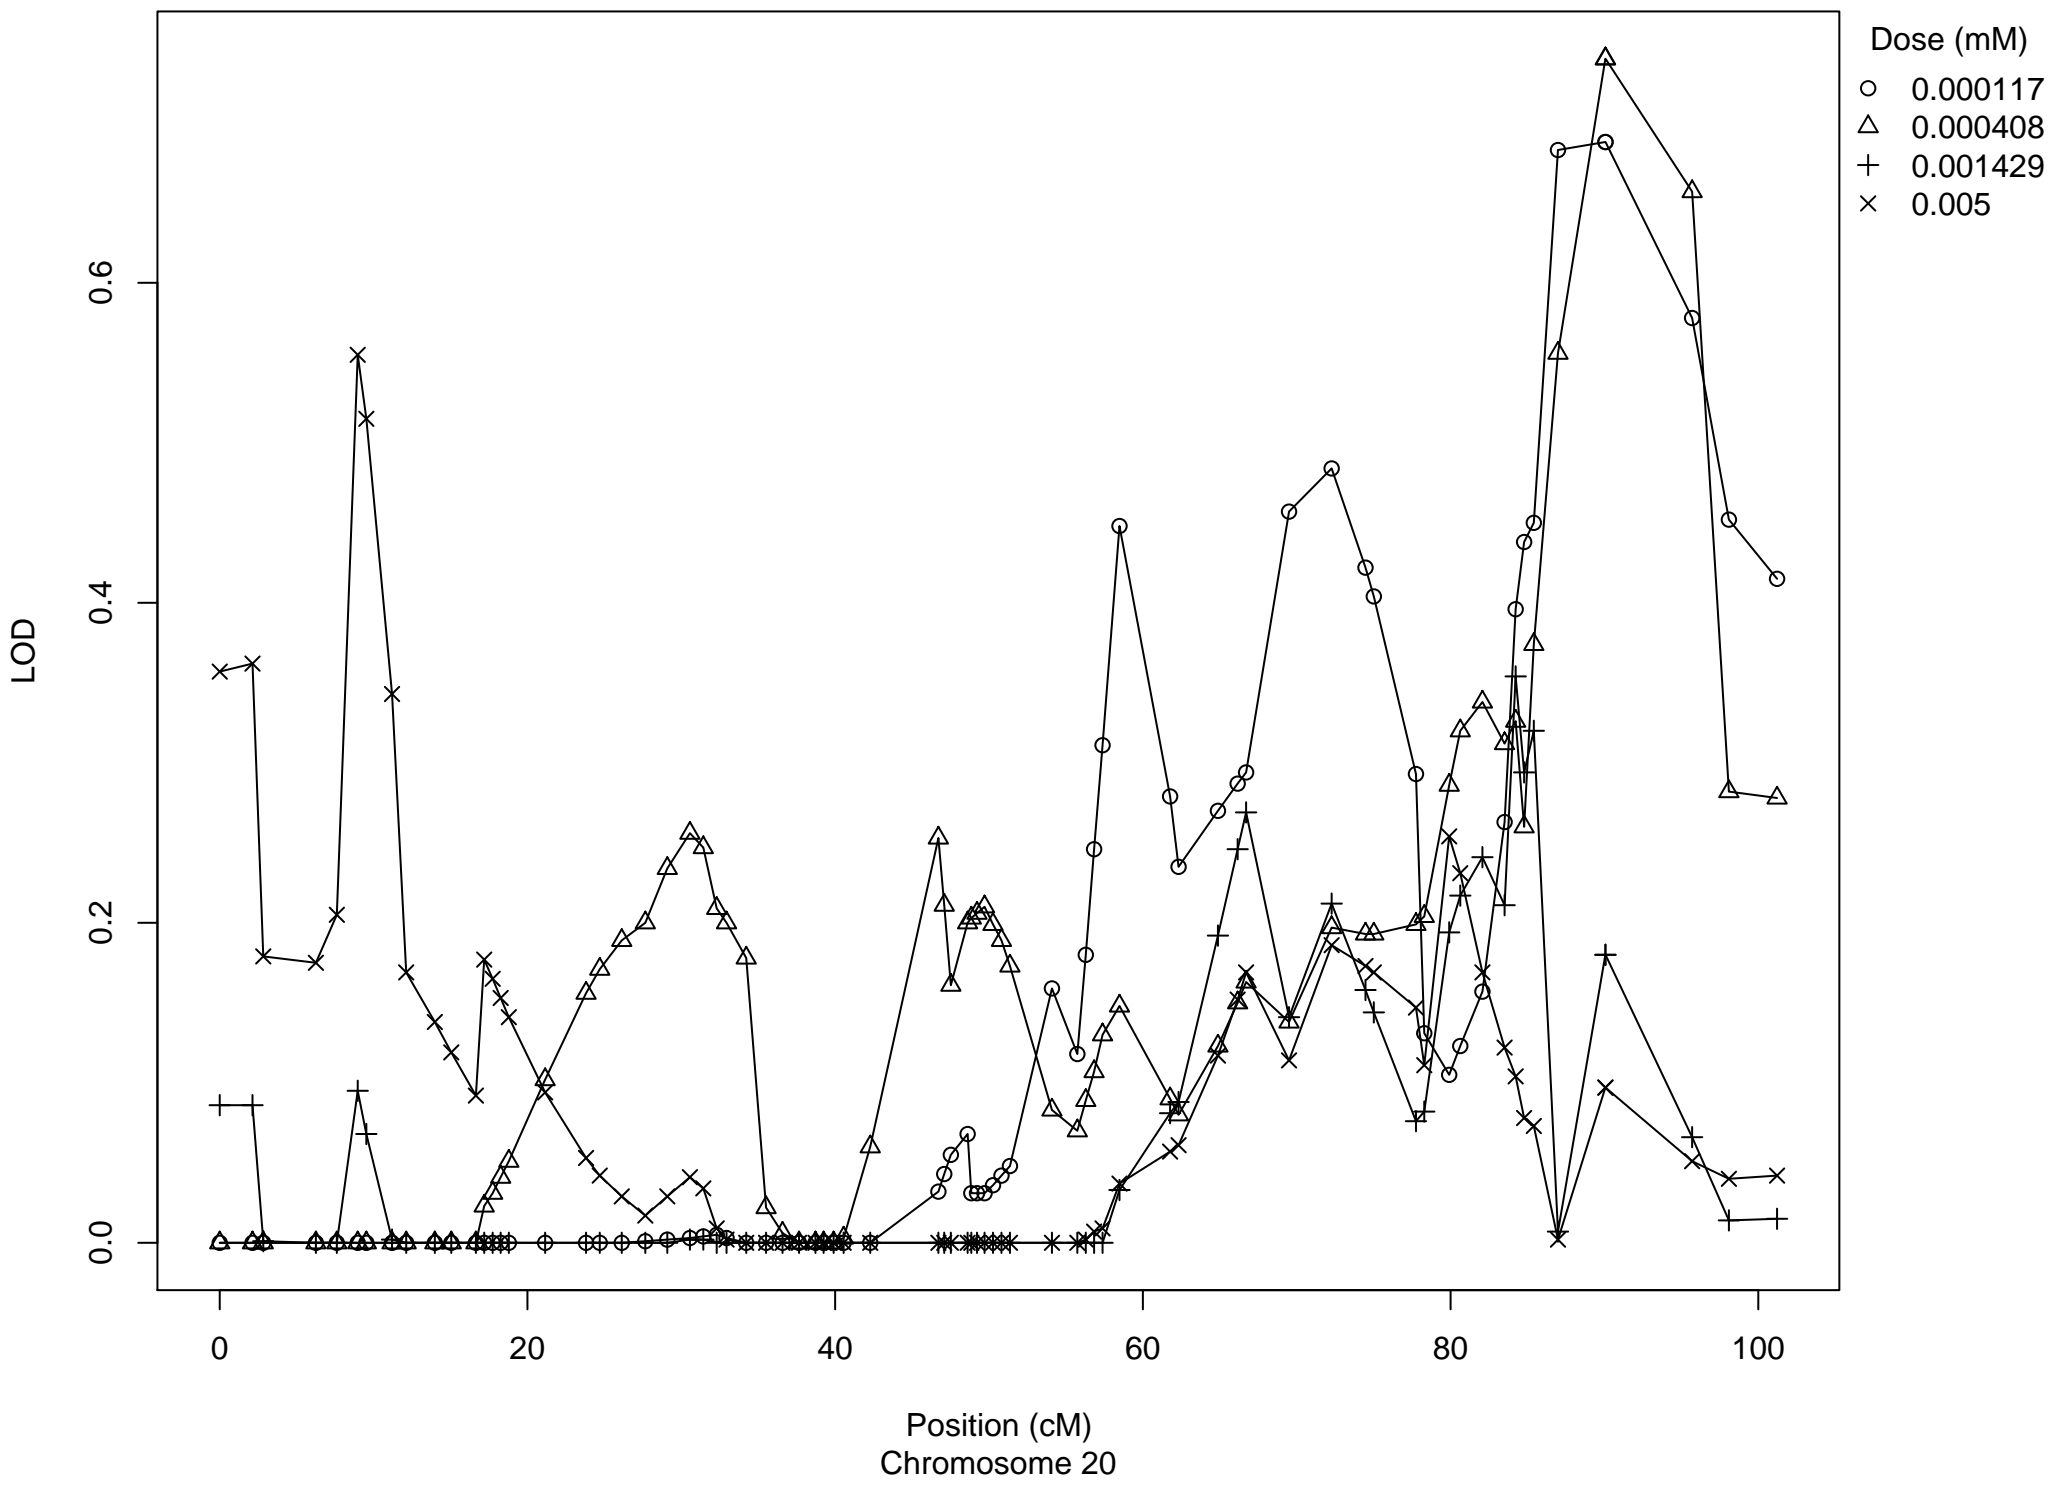



# Etoposide (Etop)

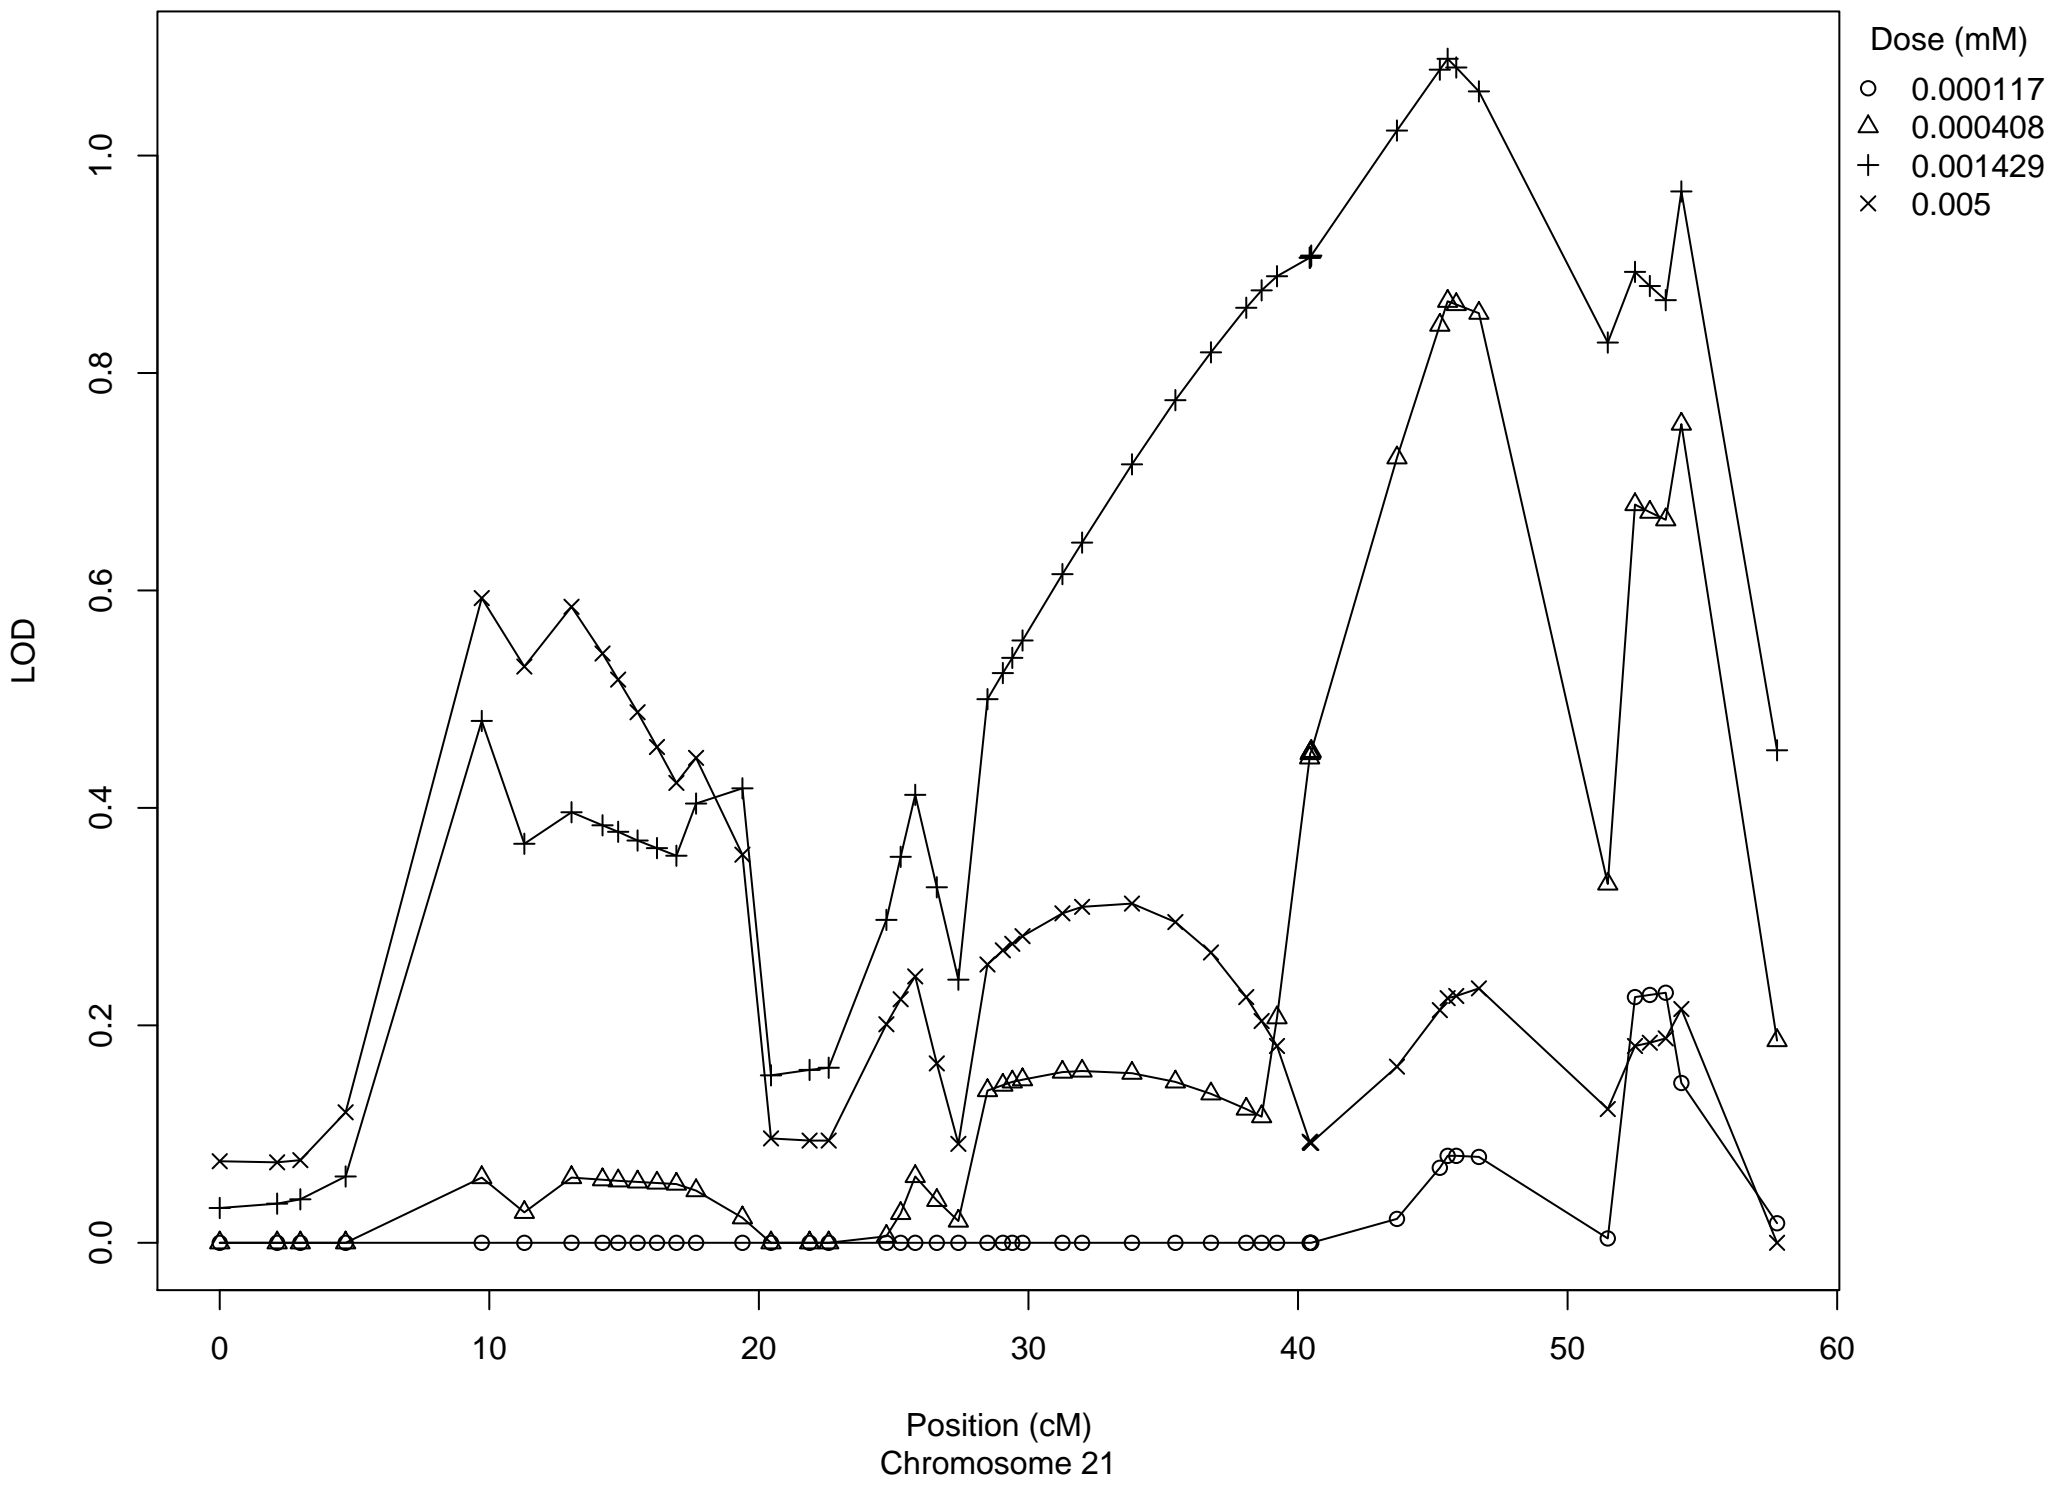

# Etoposide (Etop)

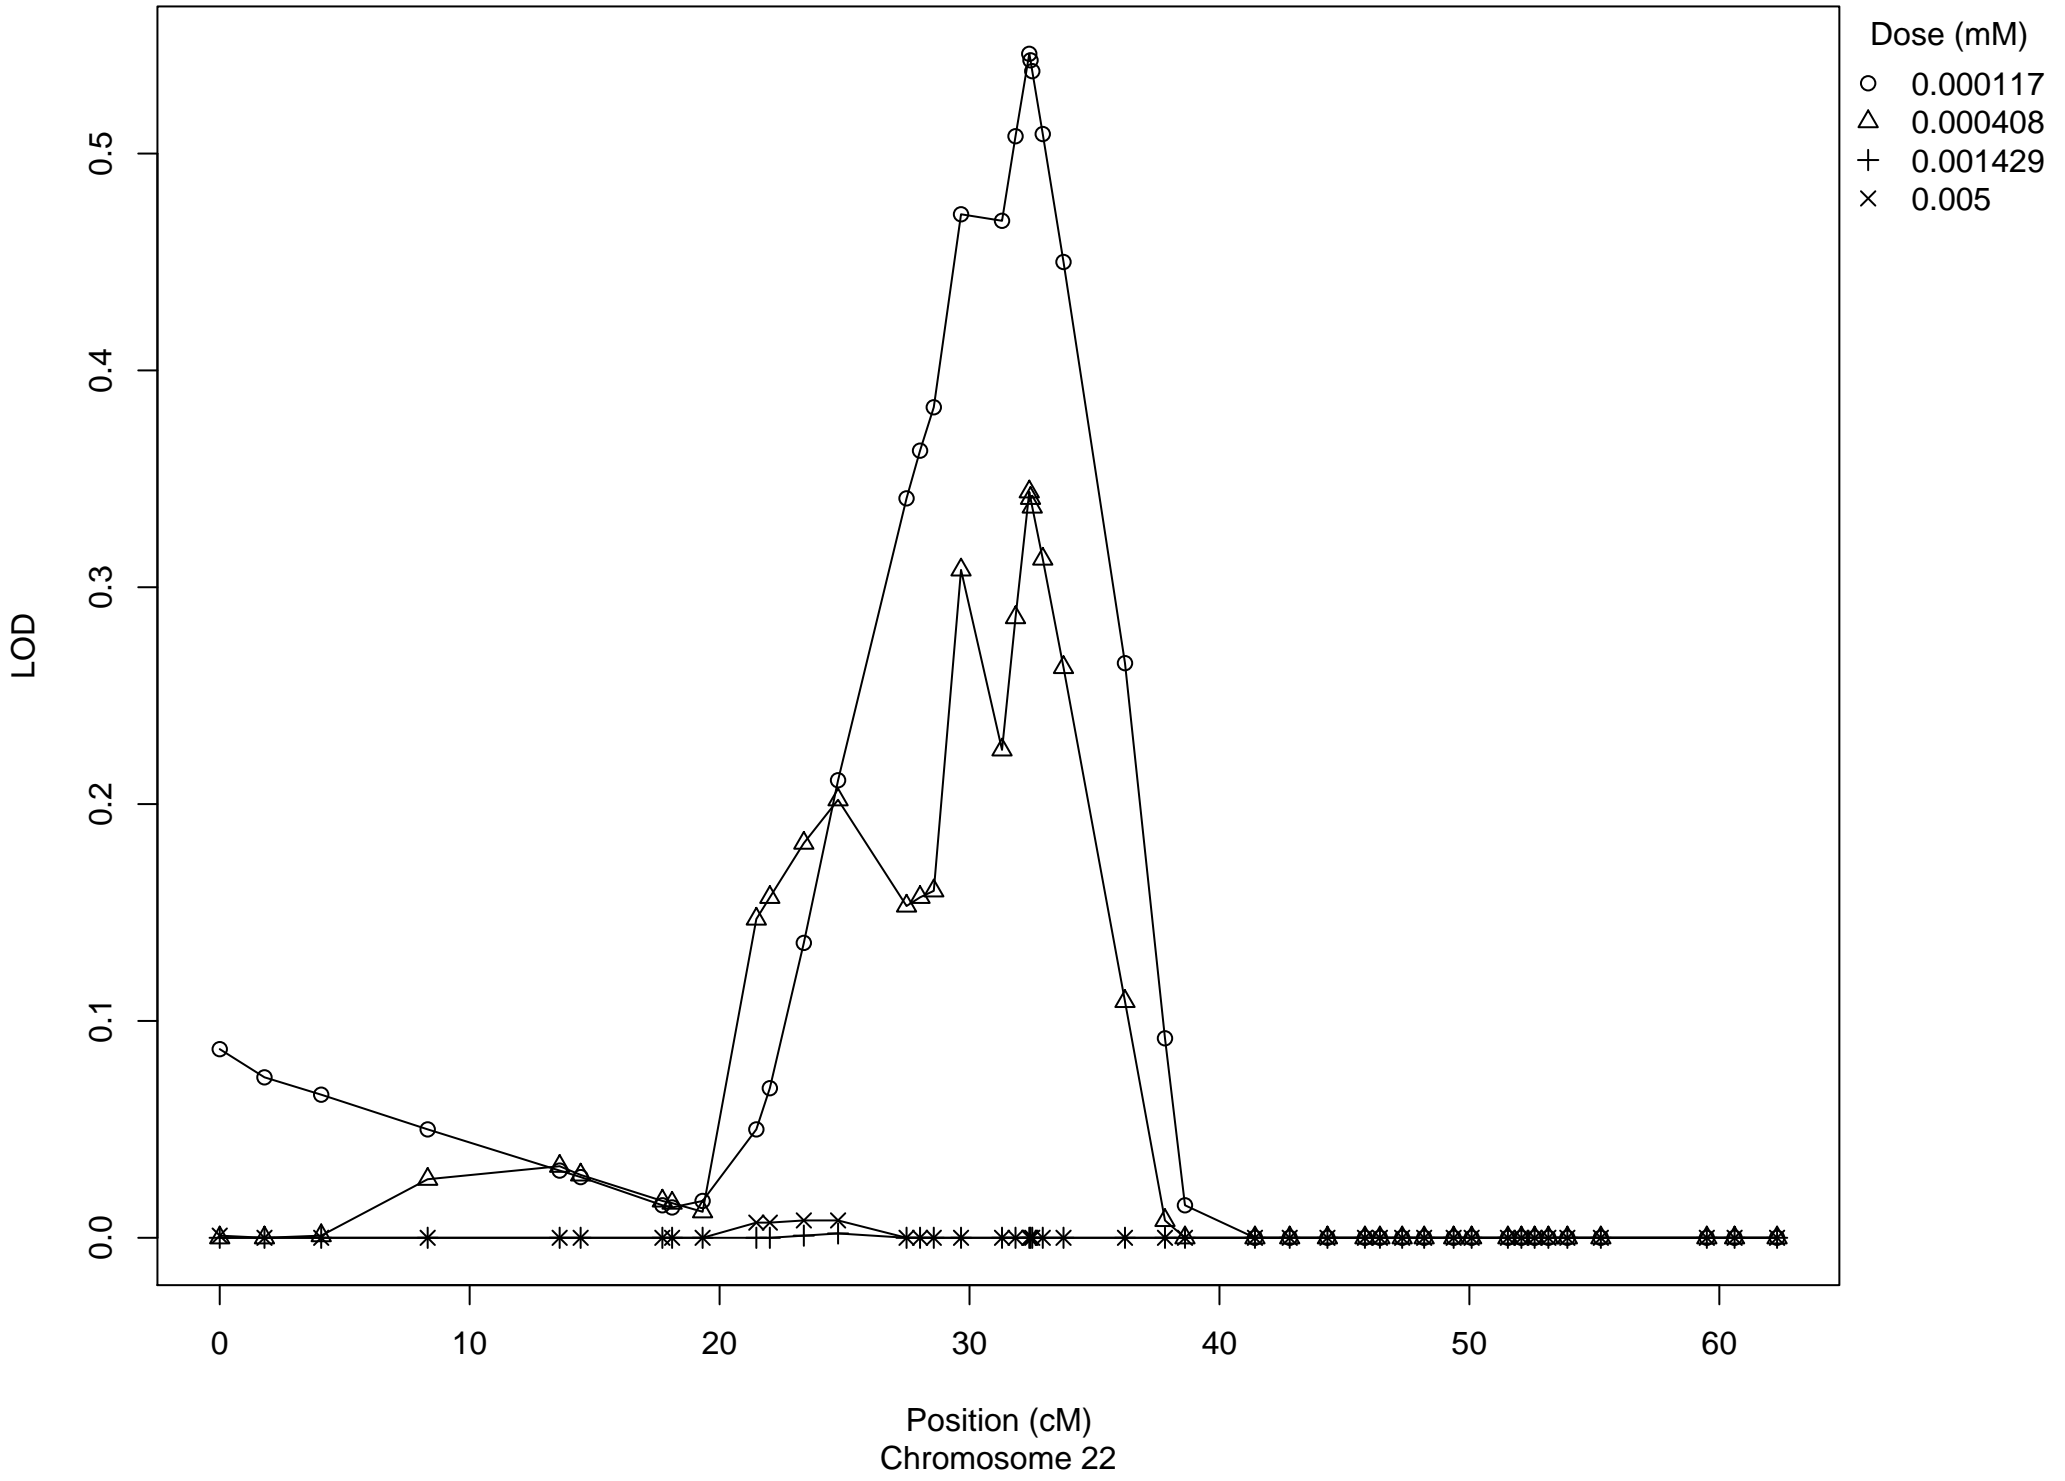

# Gemcitabine (Gem)

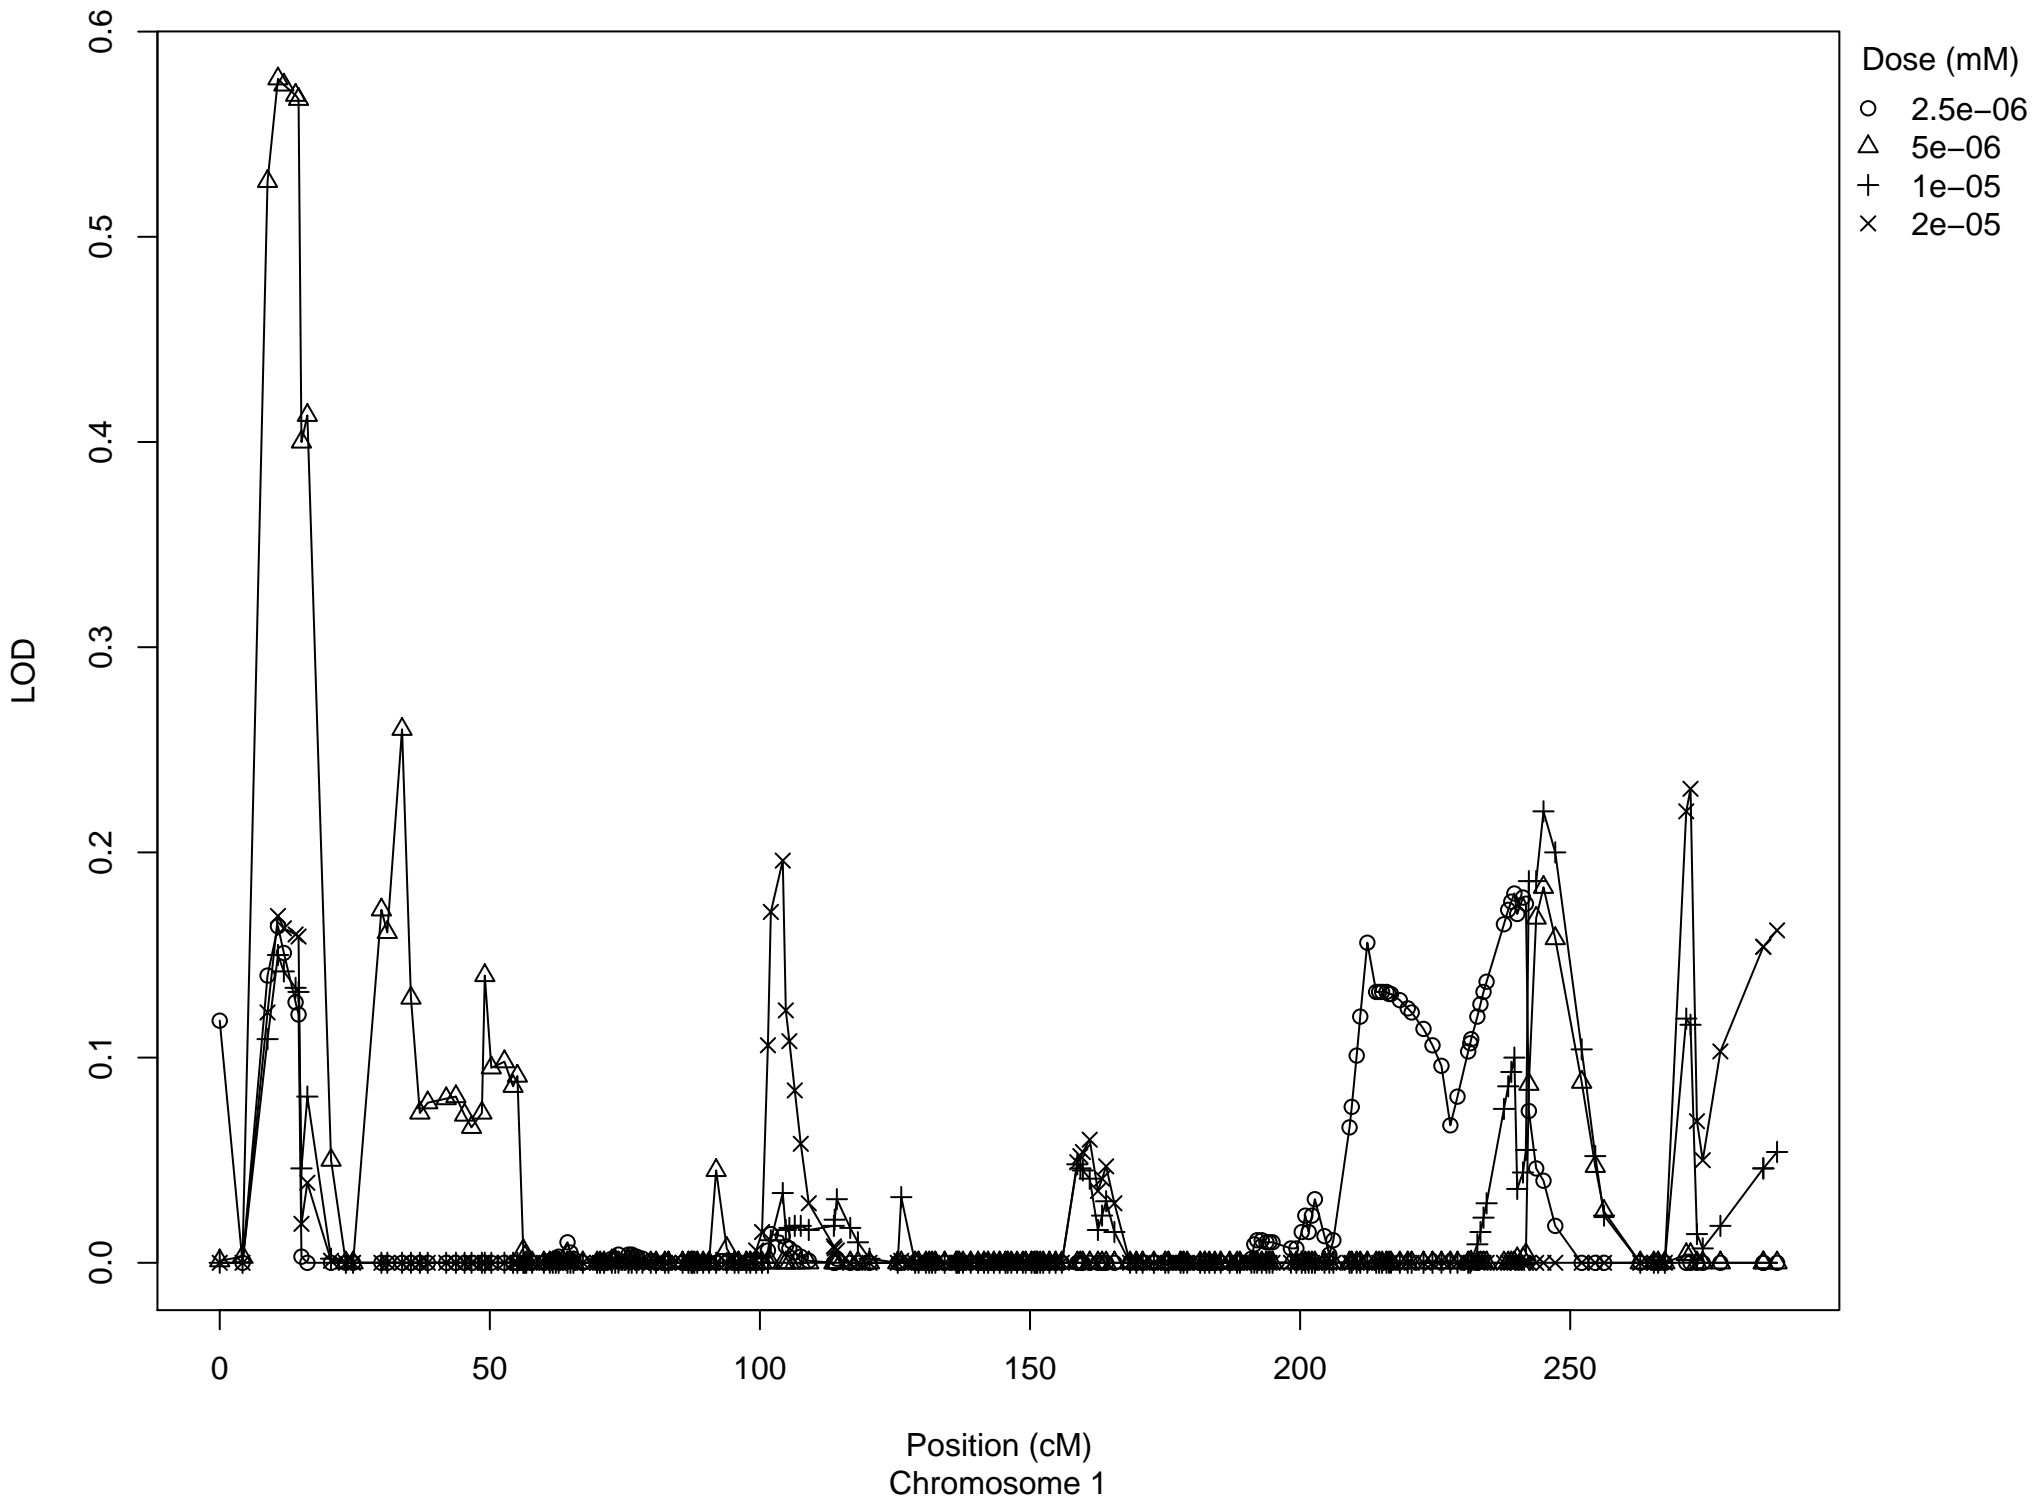

# Gemcitabine (Gem)

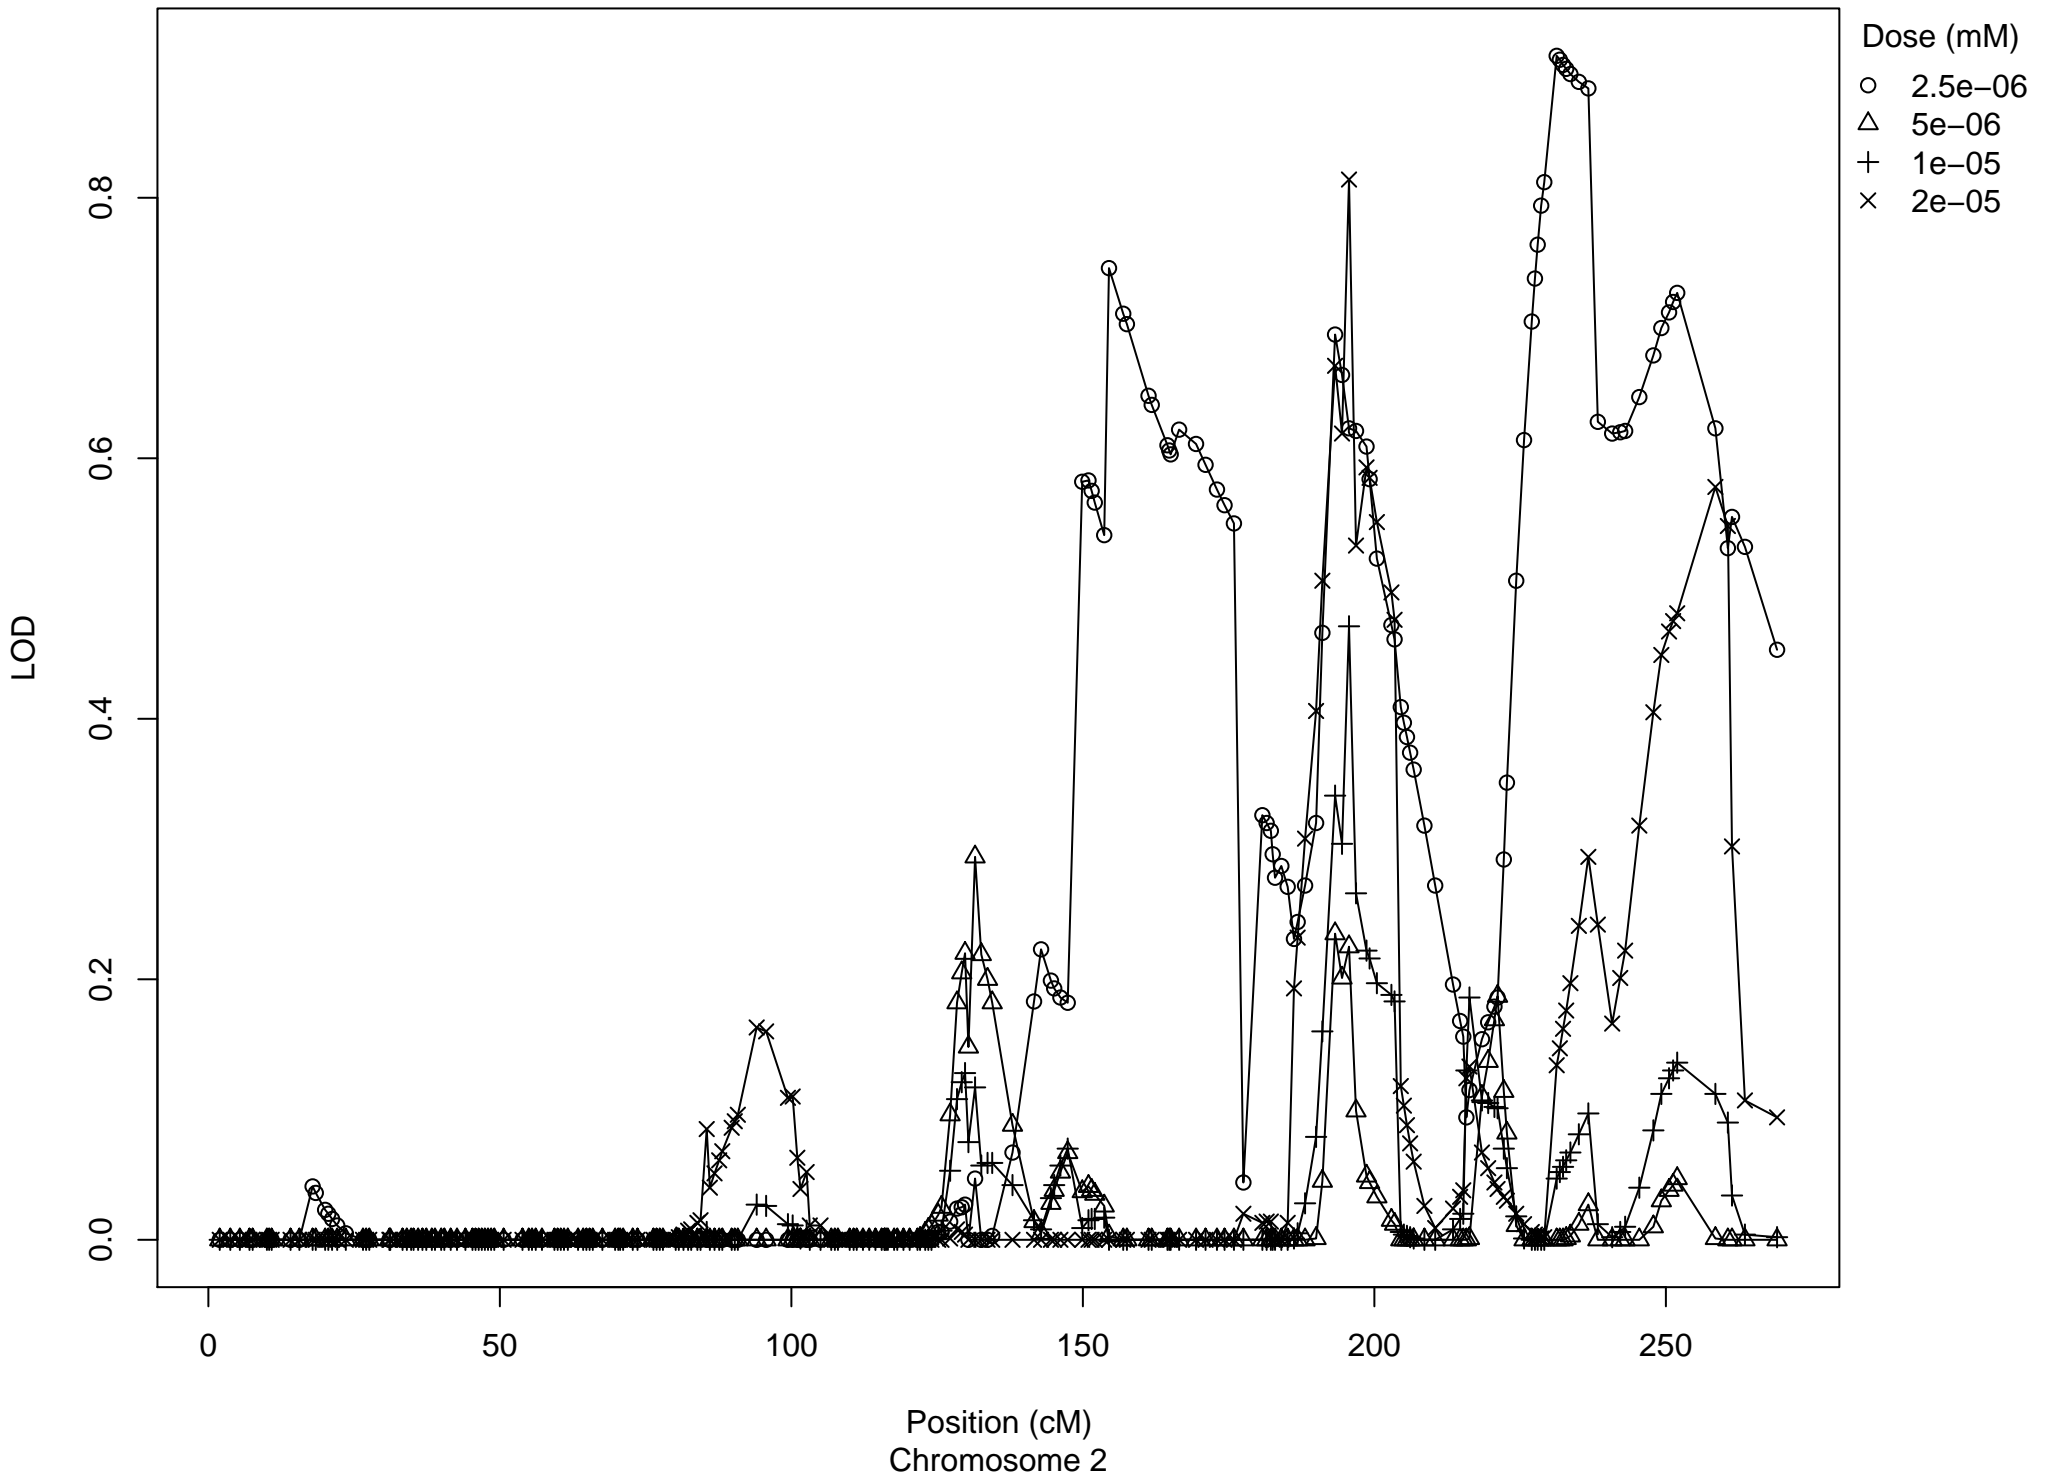

# Gemcitabine (Gem)

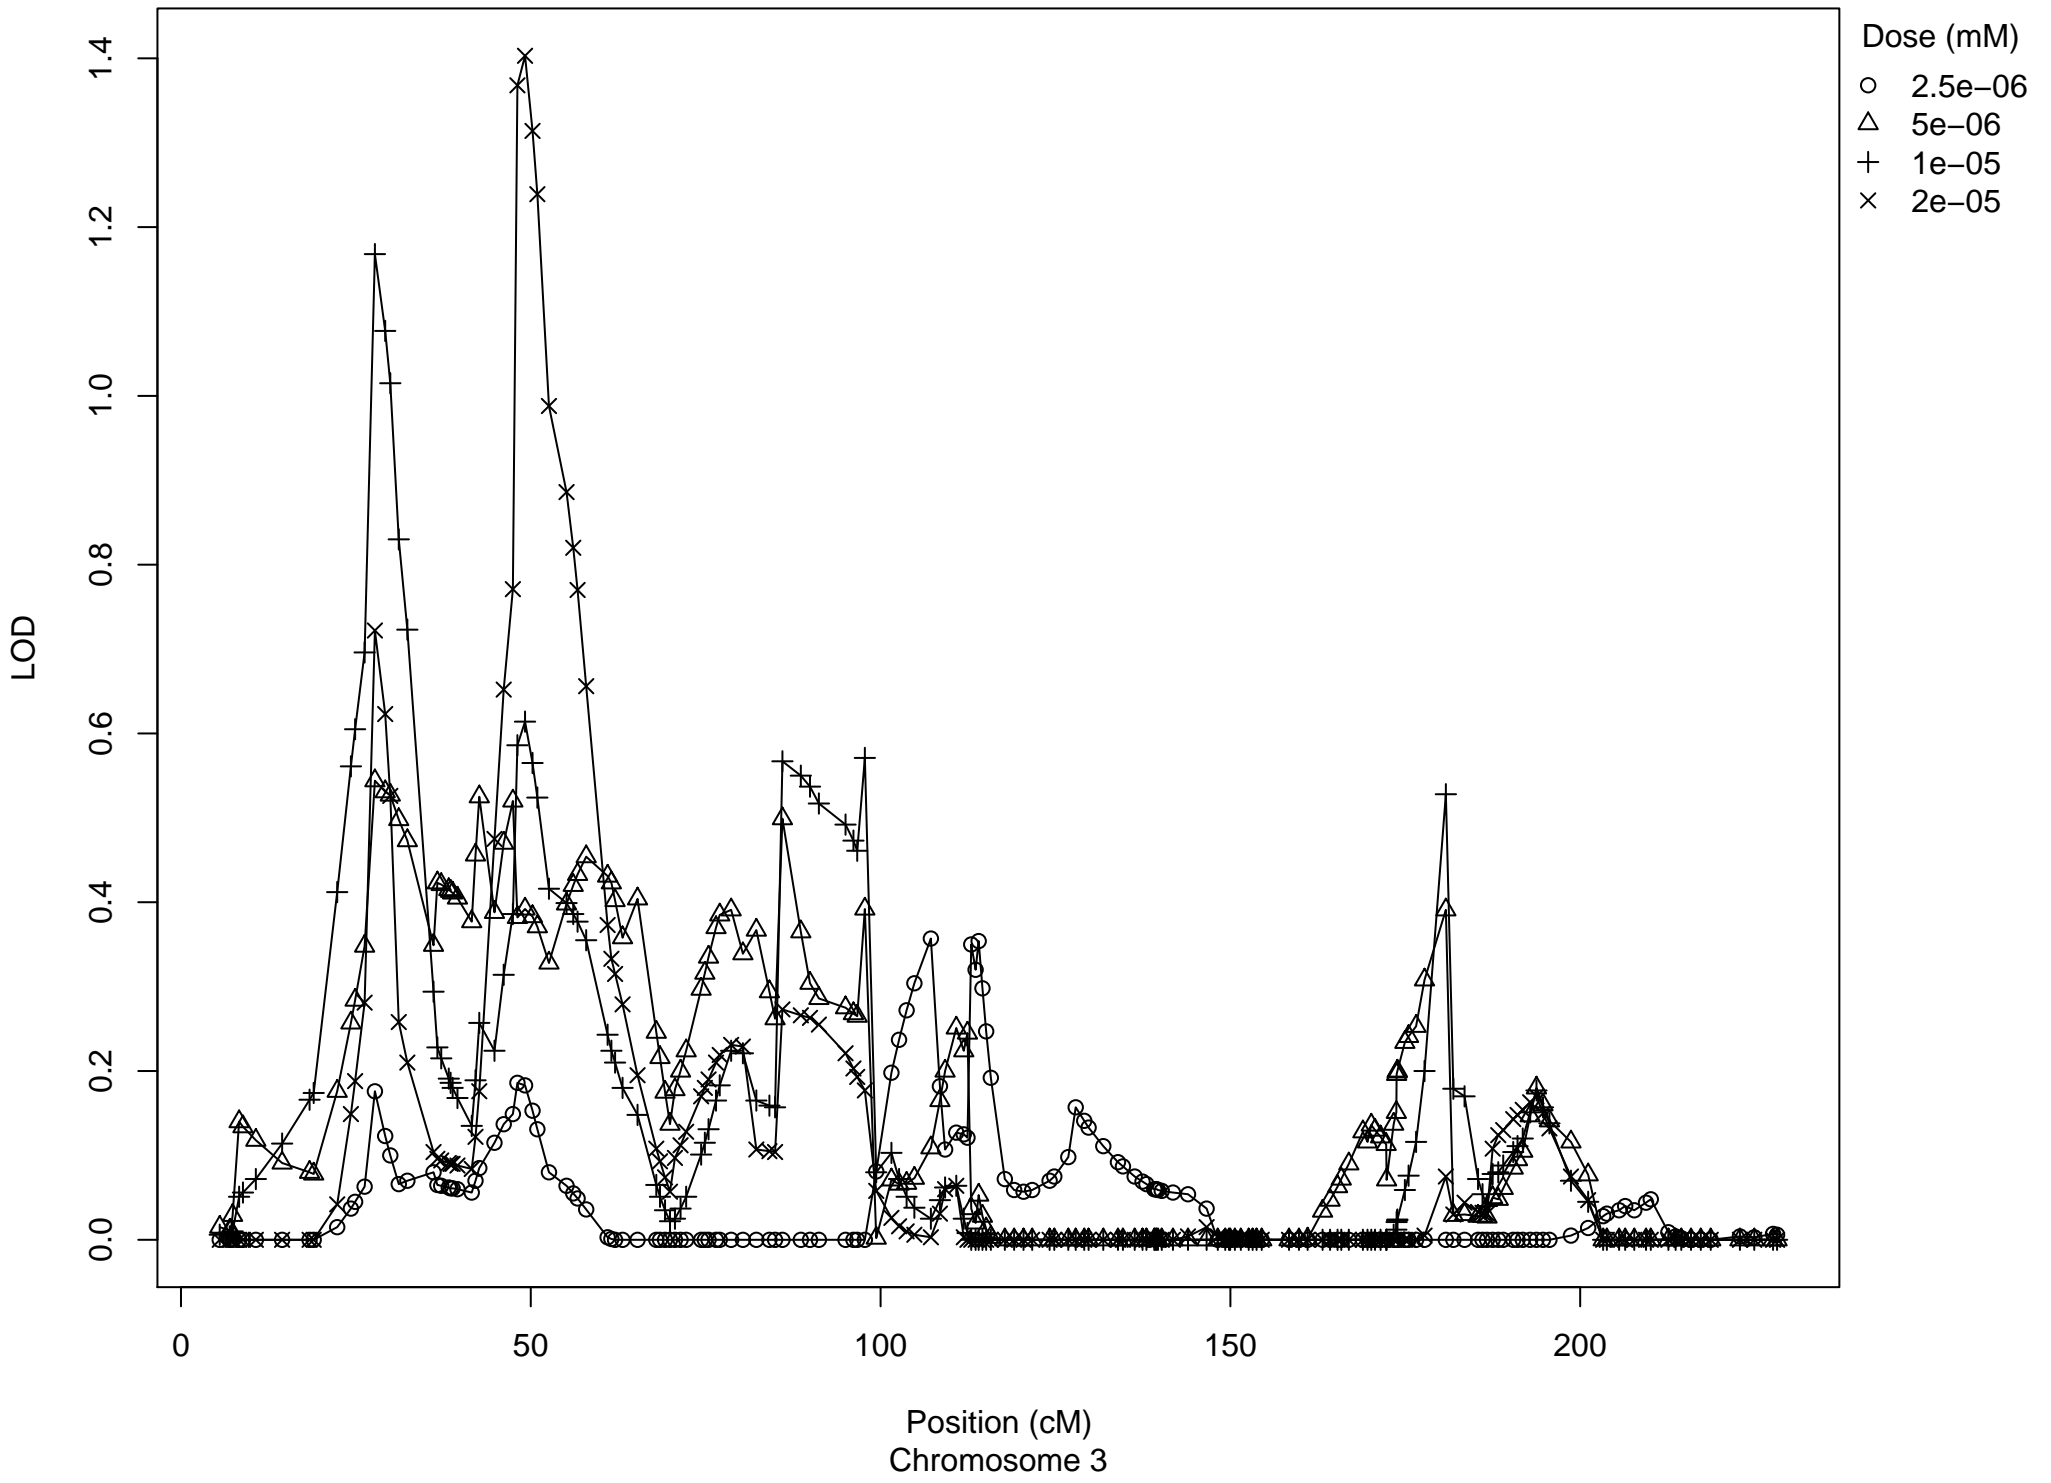

# Gemcitabine (Gem)

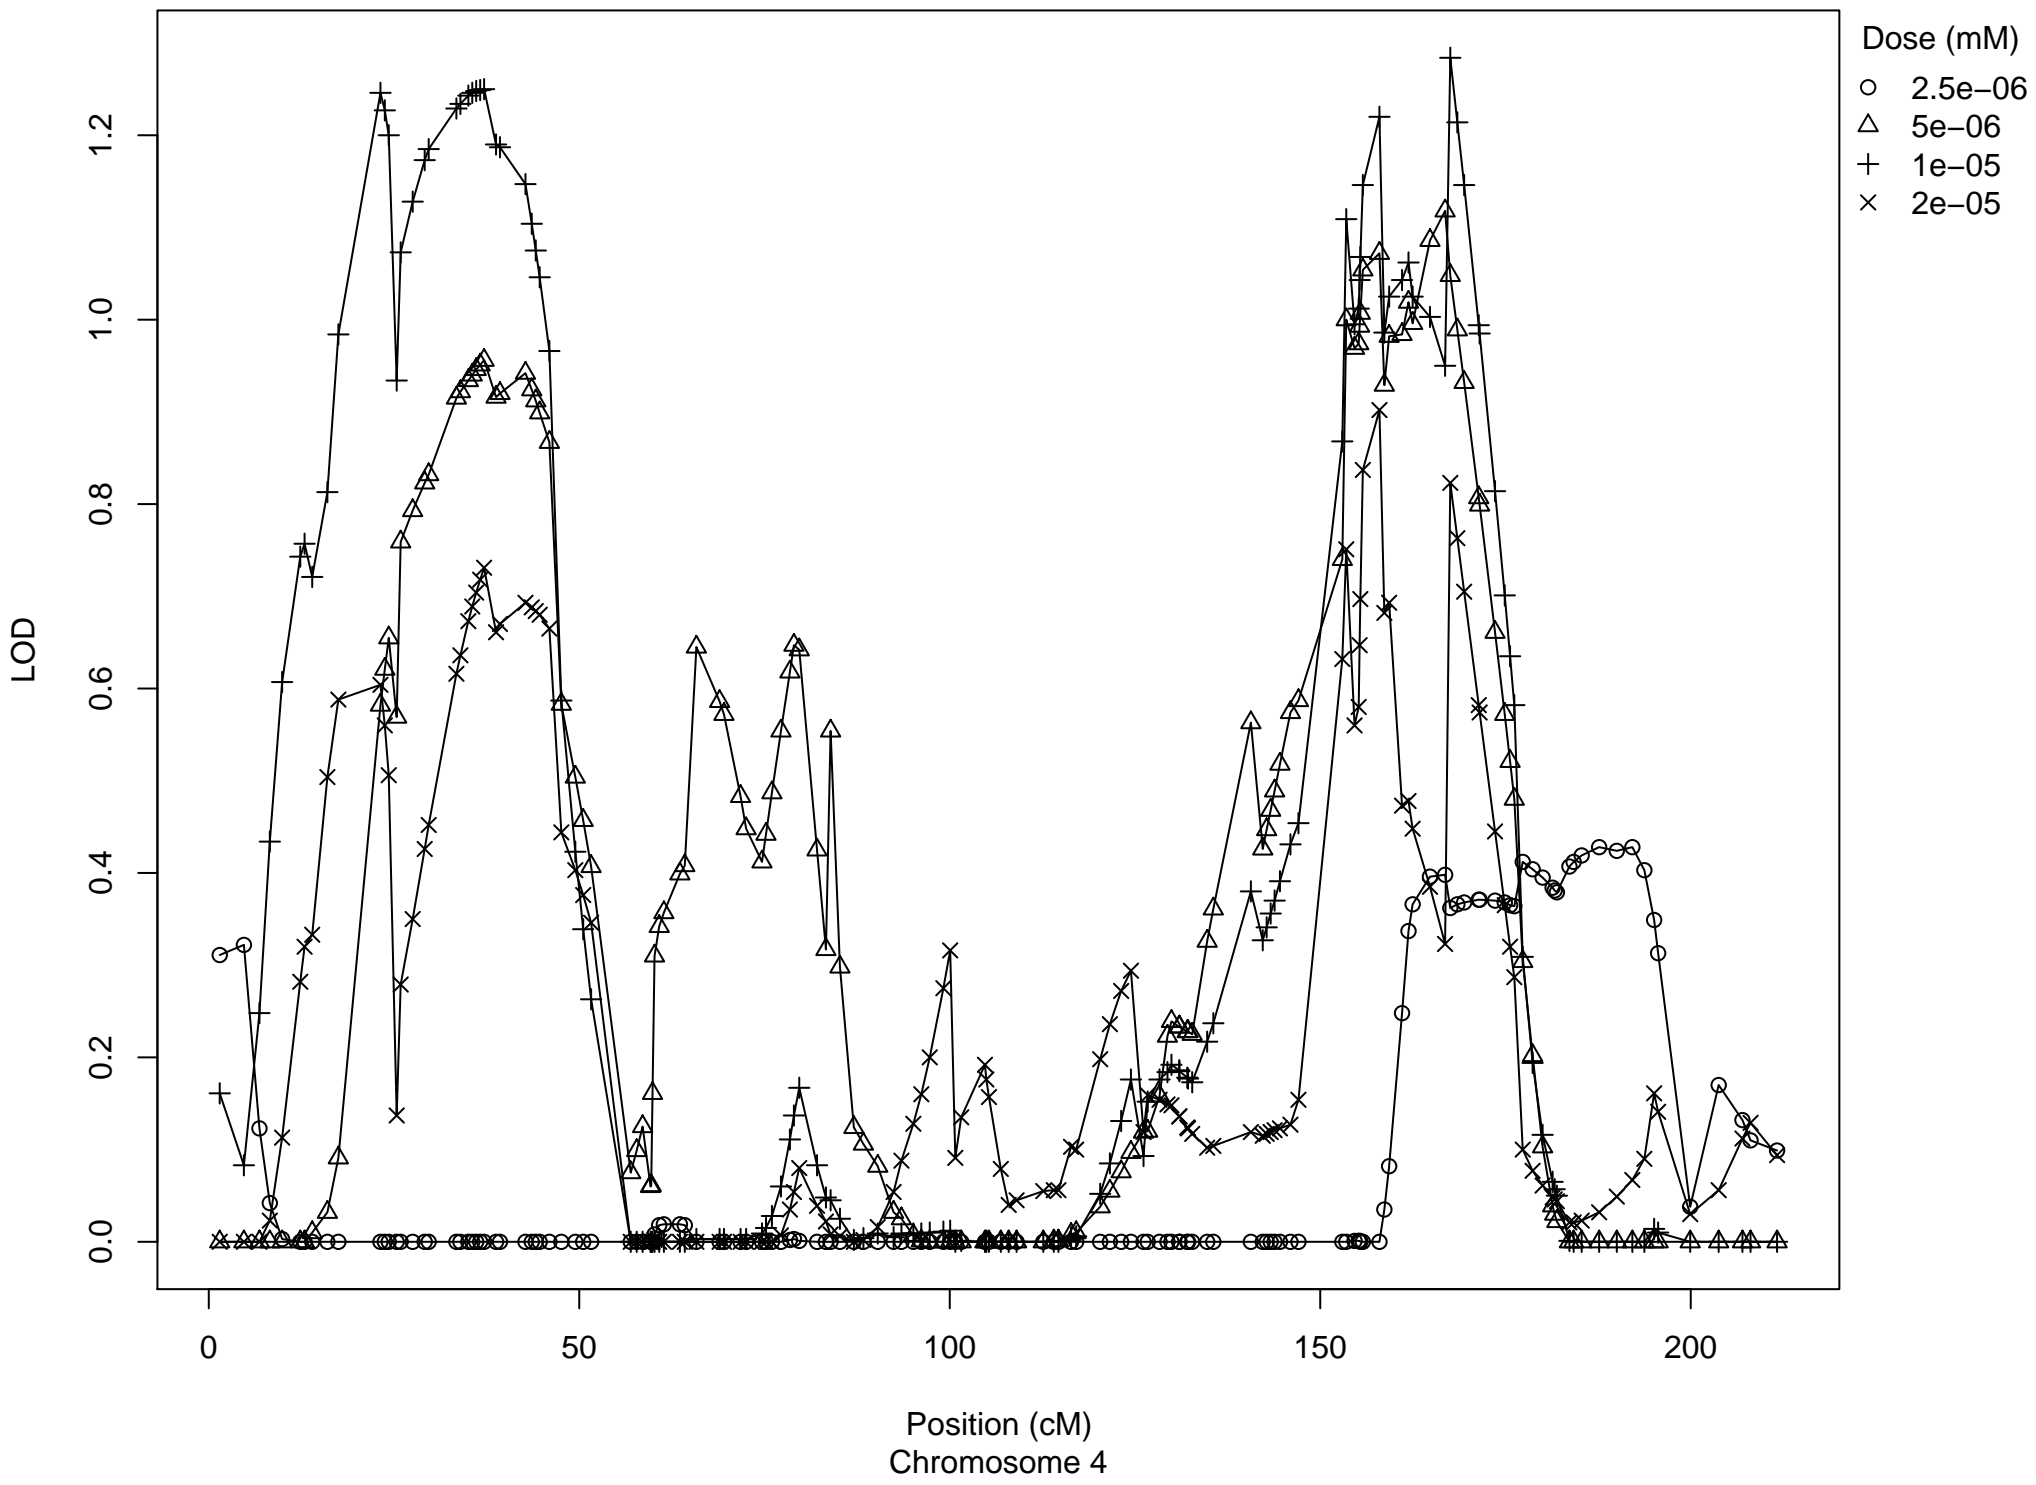

# Gemcitabine (Gem)

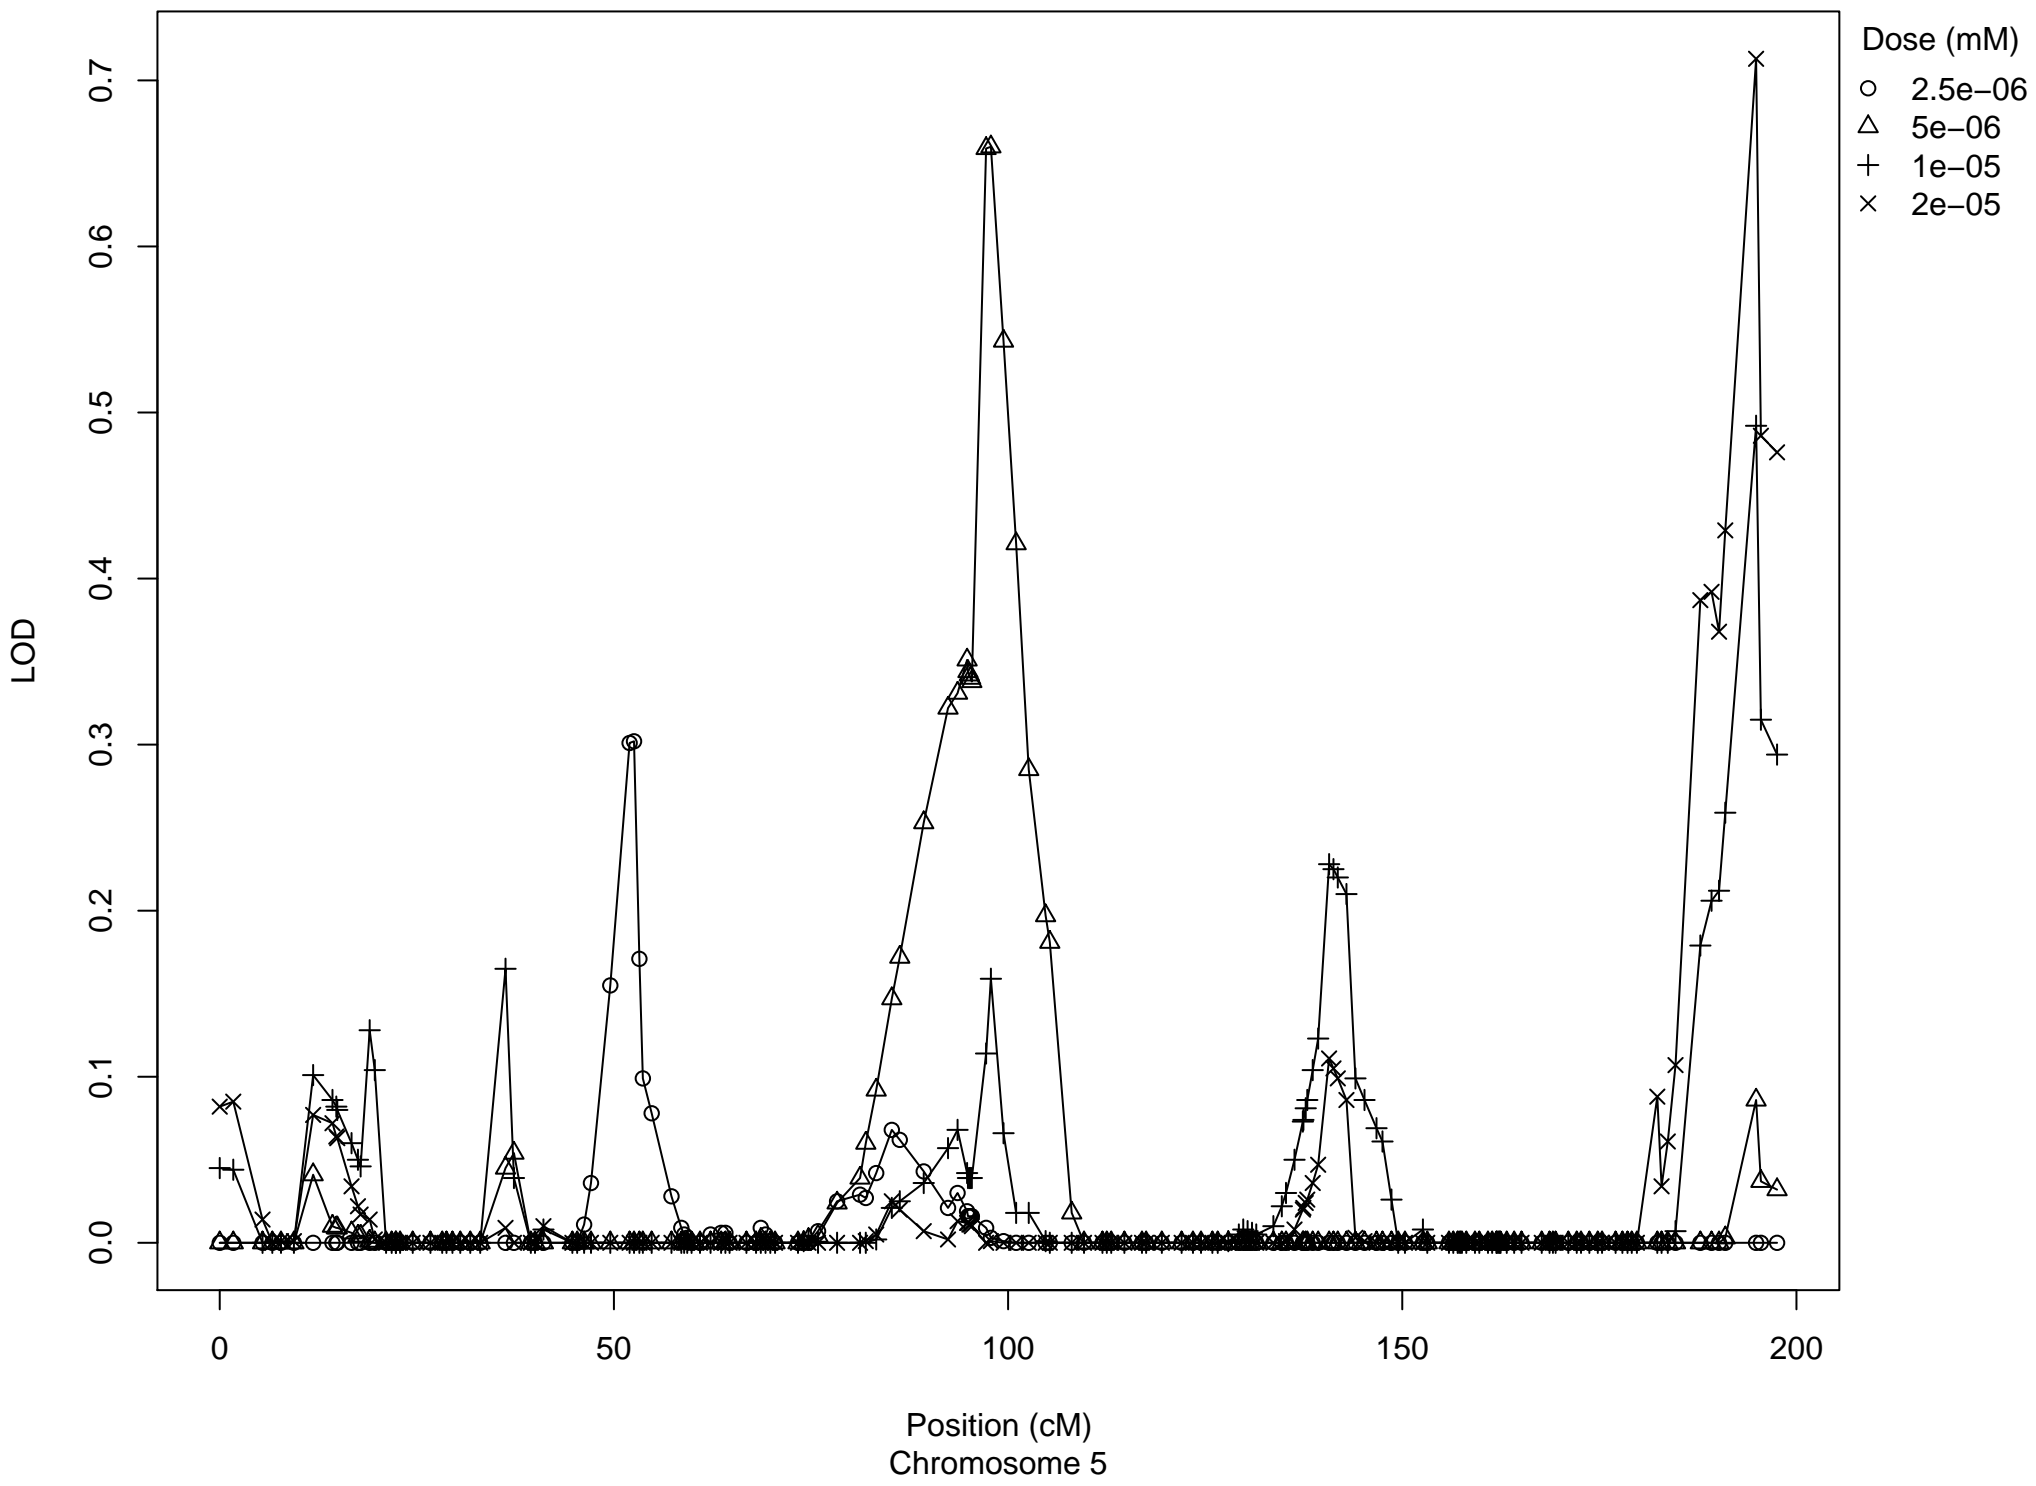

# Gemcitabine (Gem)

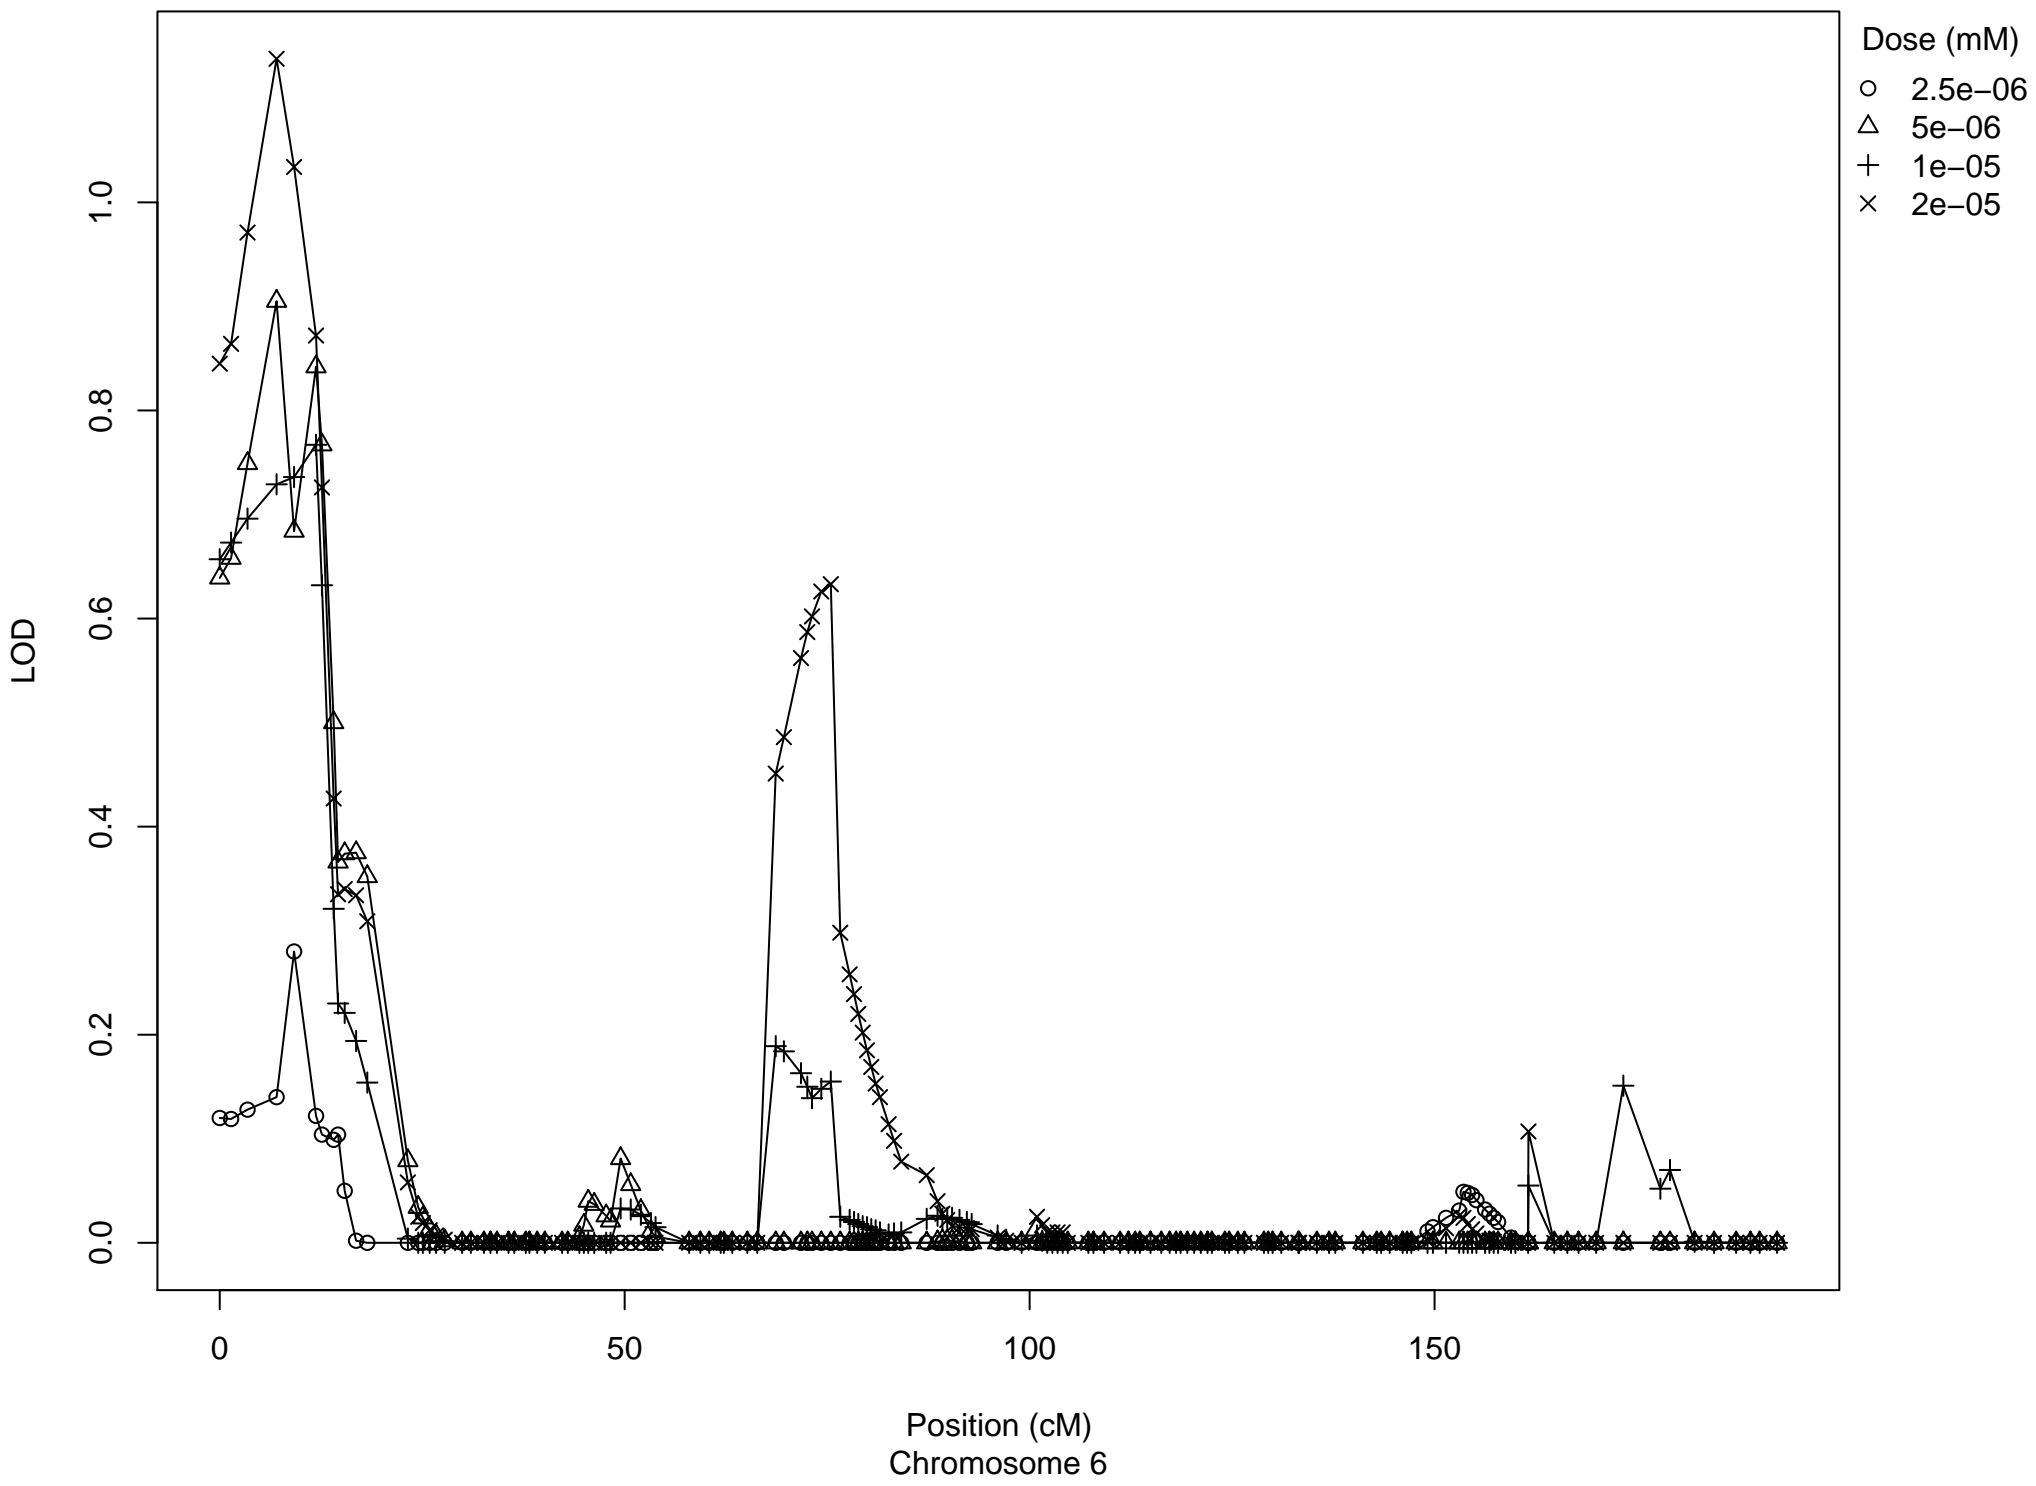



# Gemcitabine (Gem)

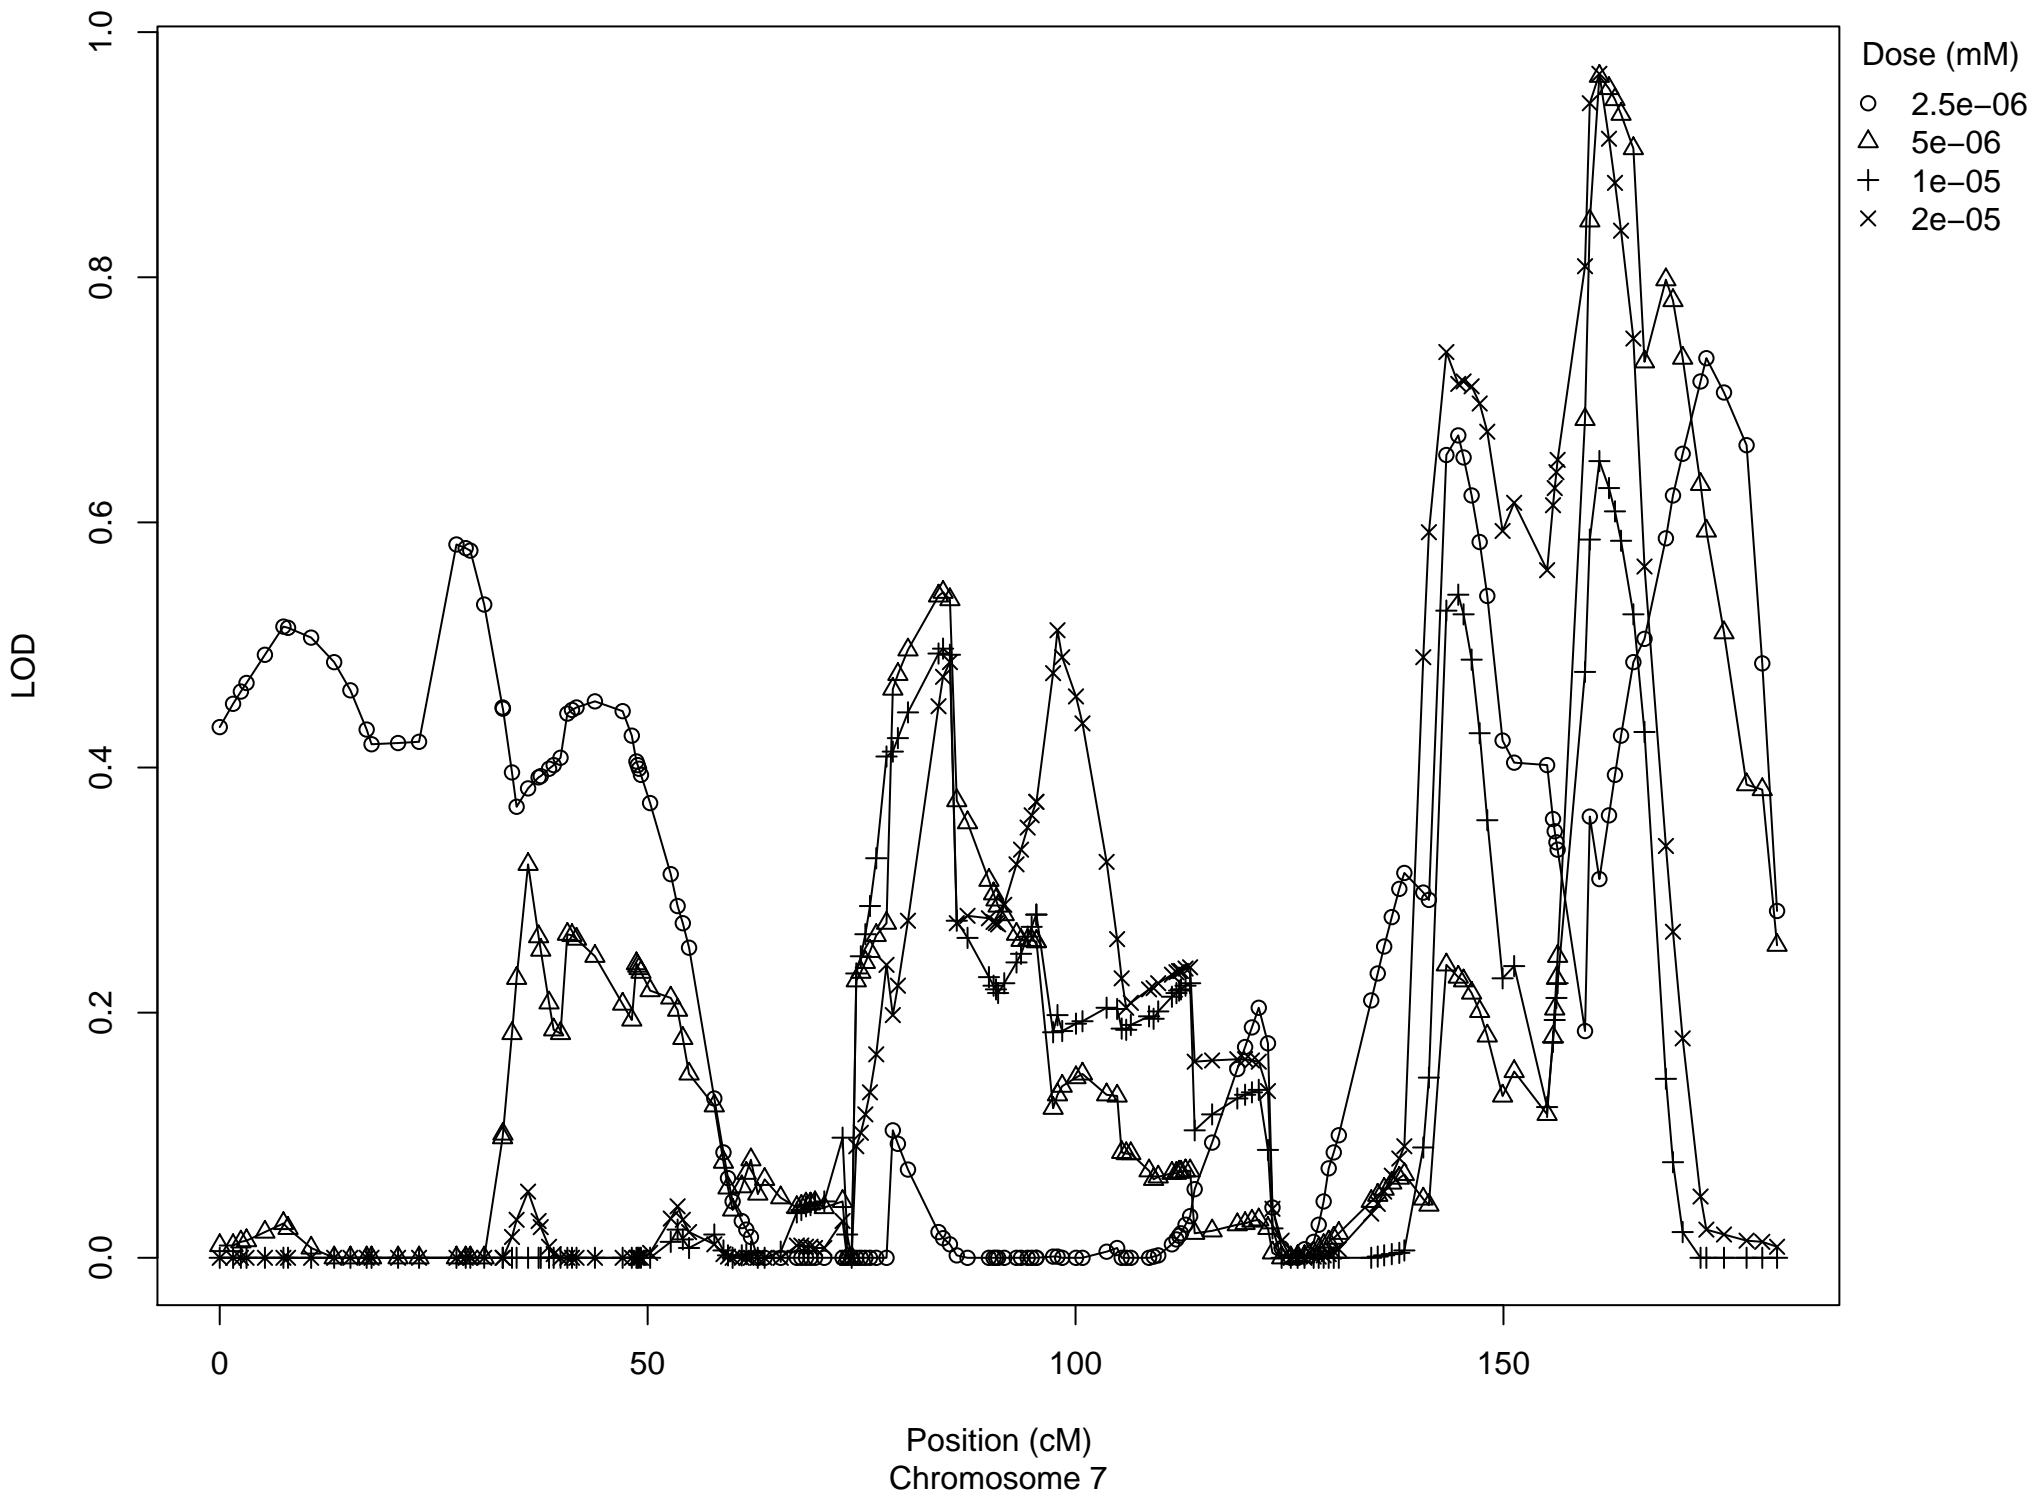

# Gemcitabine (Gem)

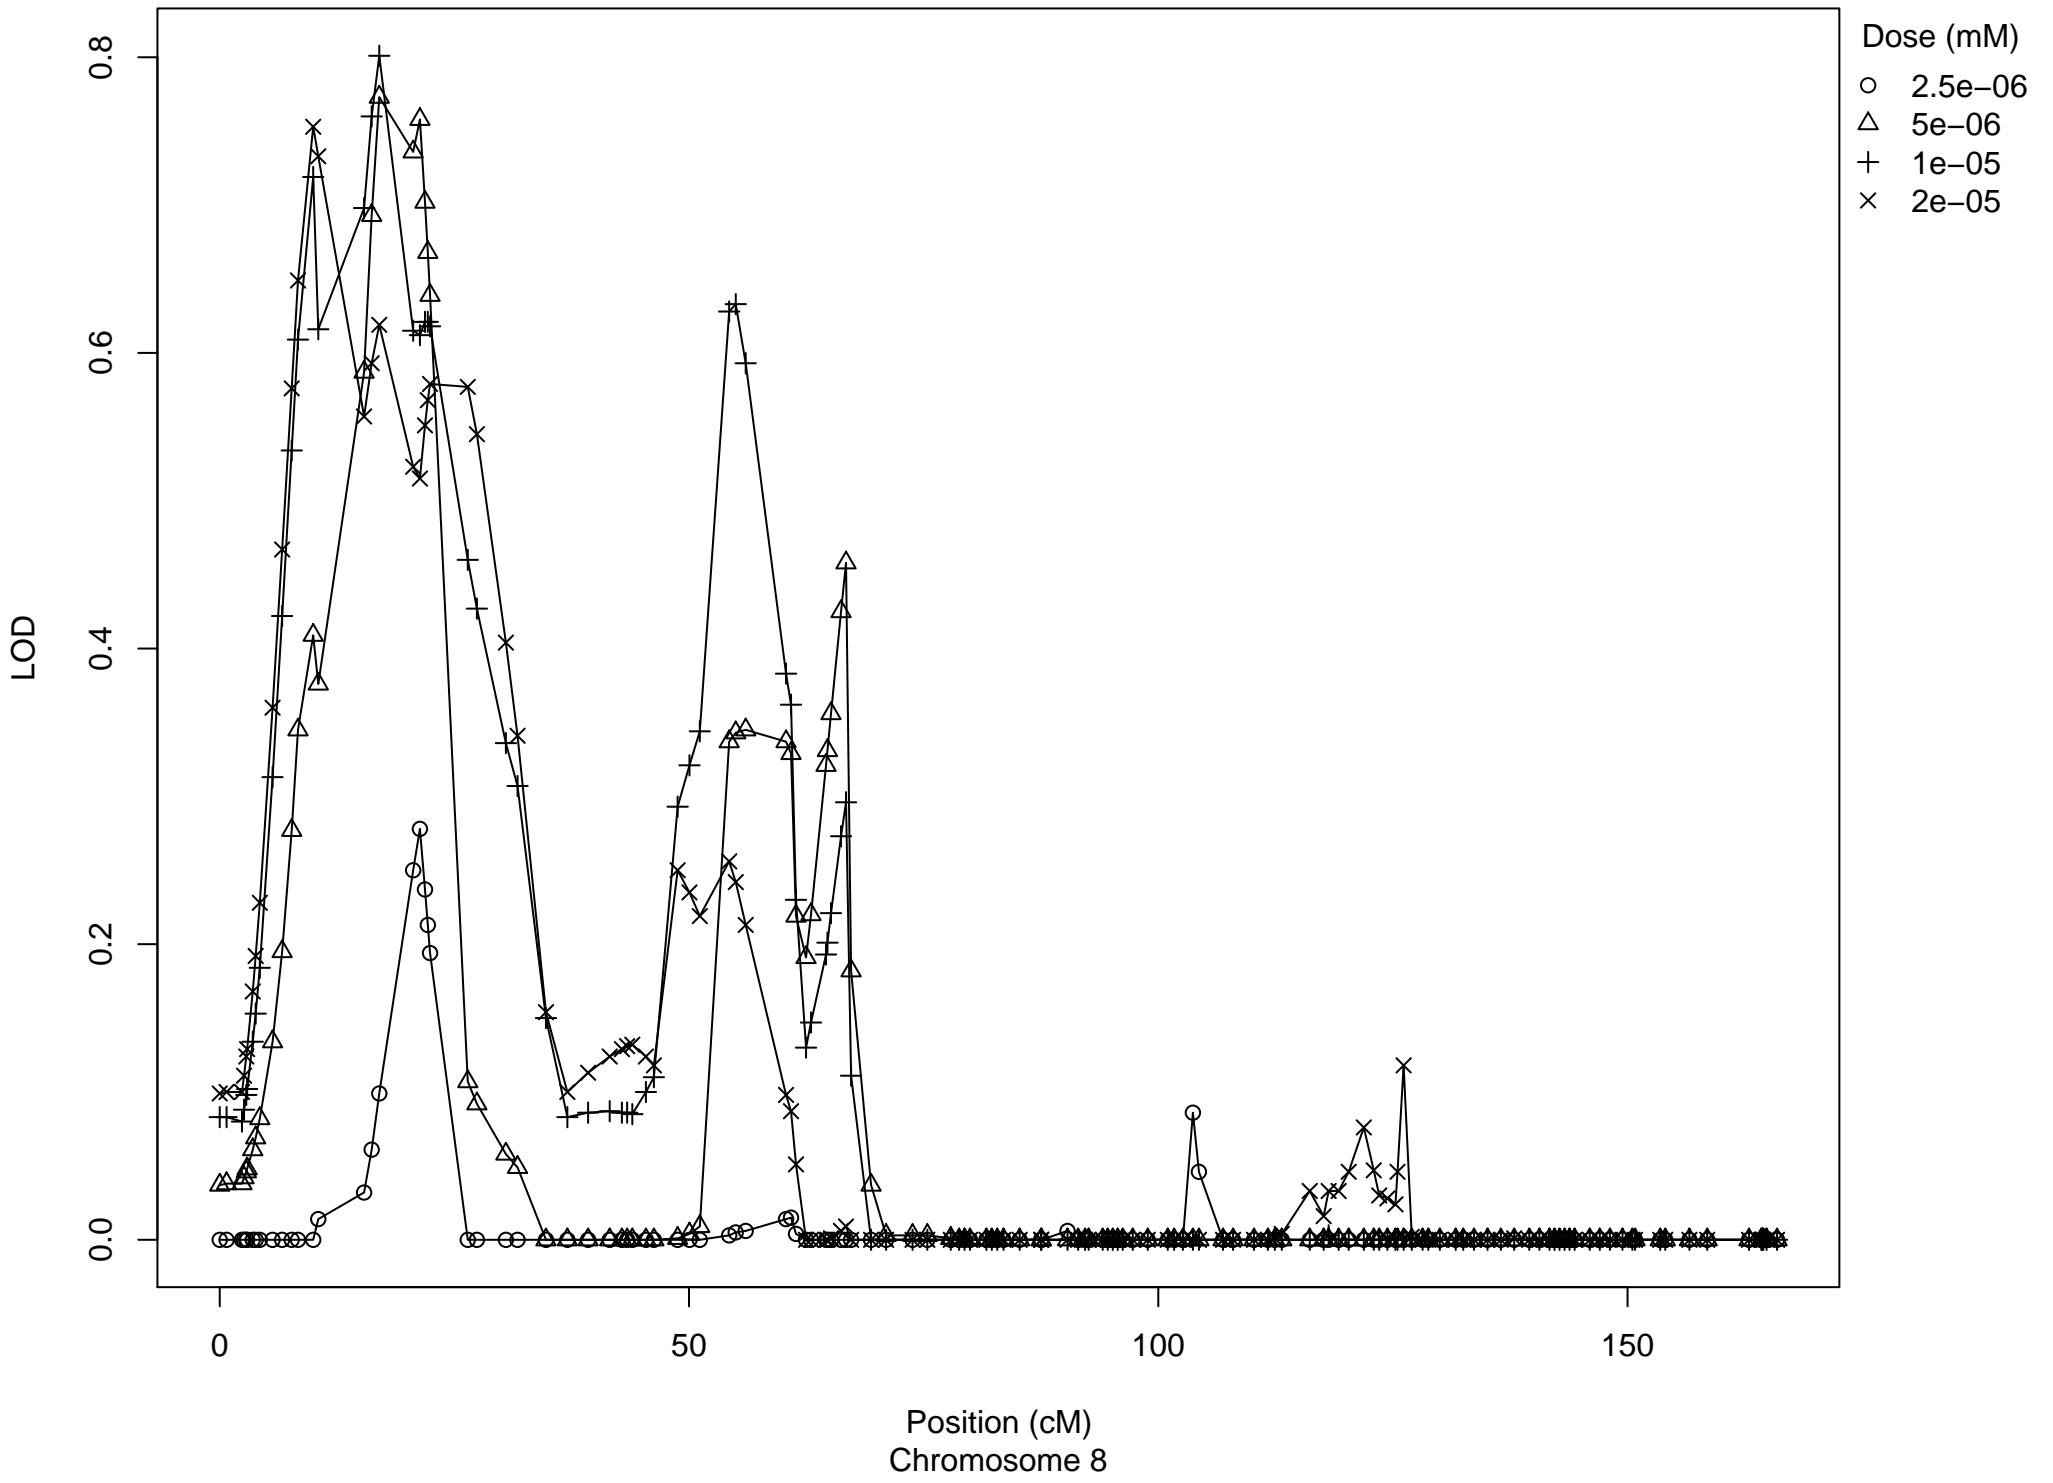

# Gemcitabine (Gem)

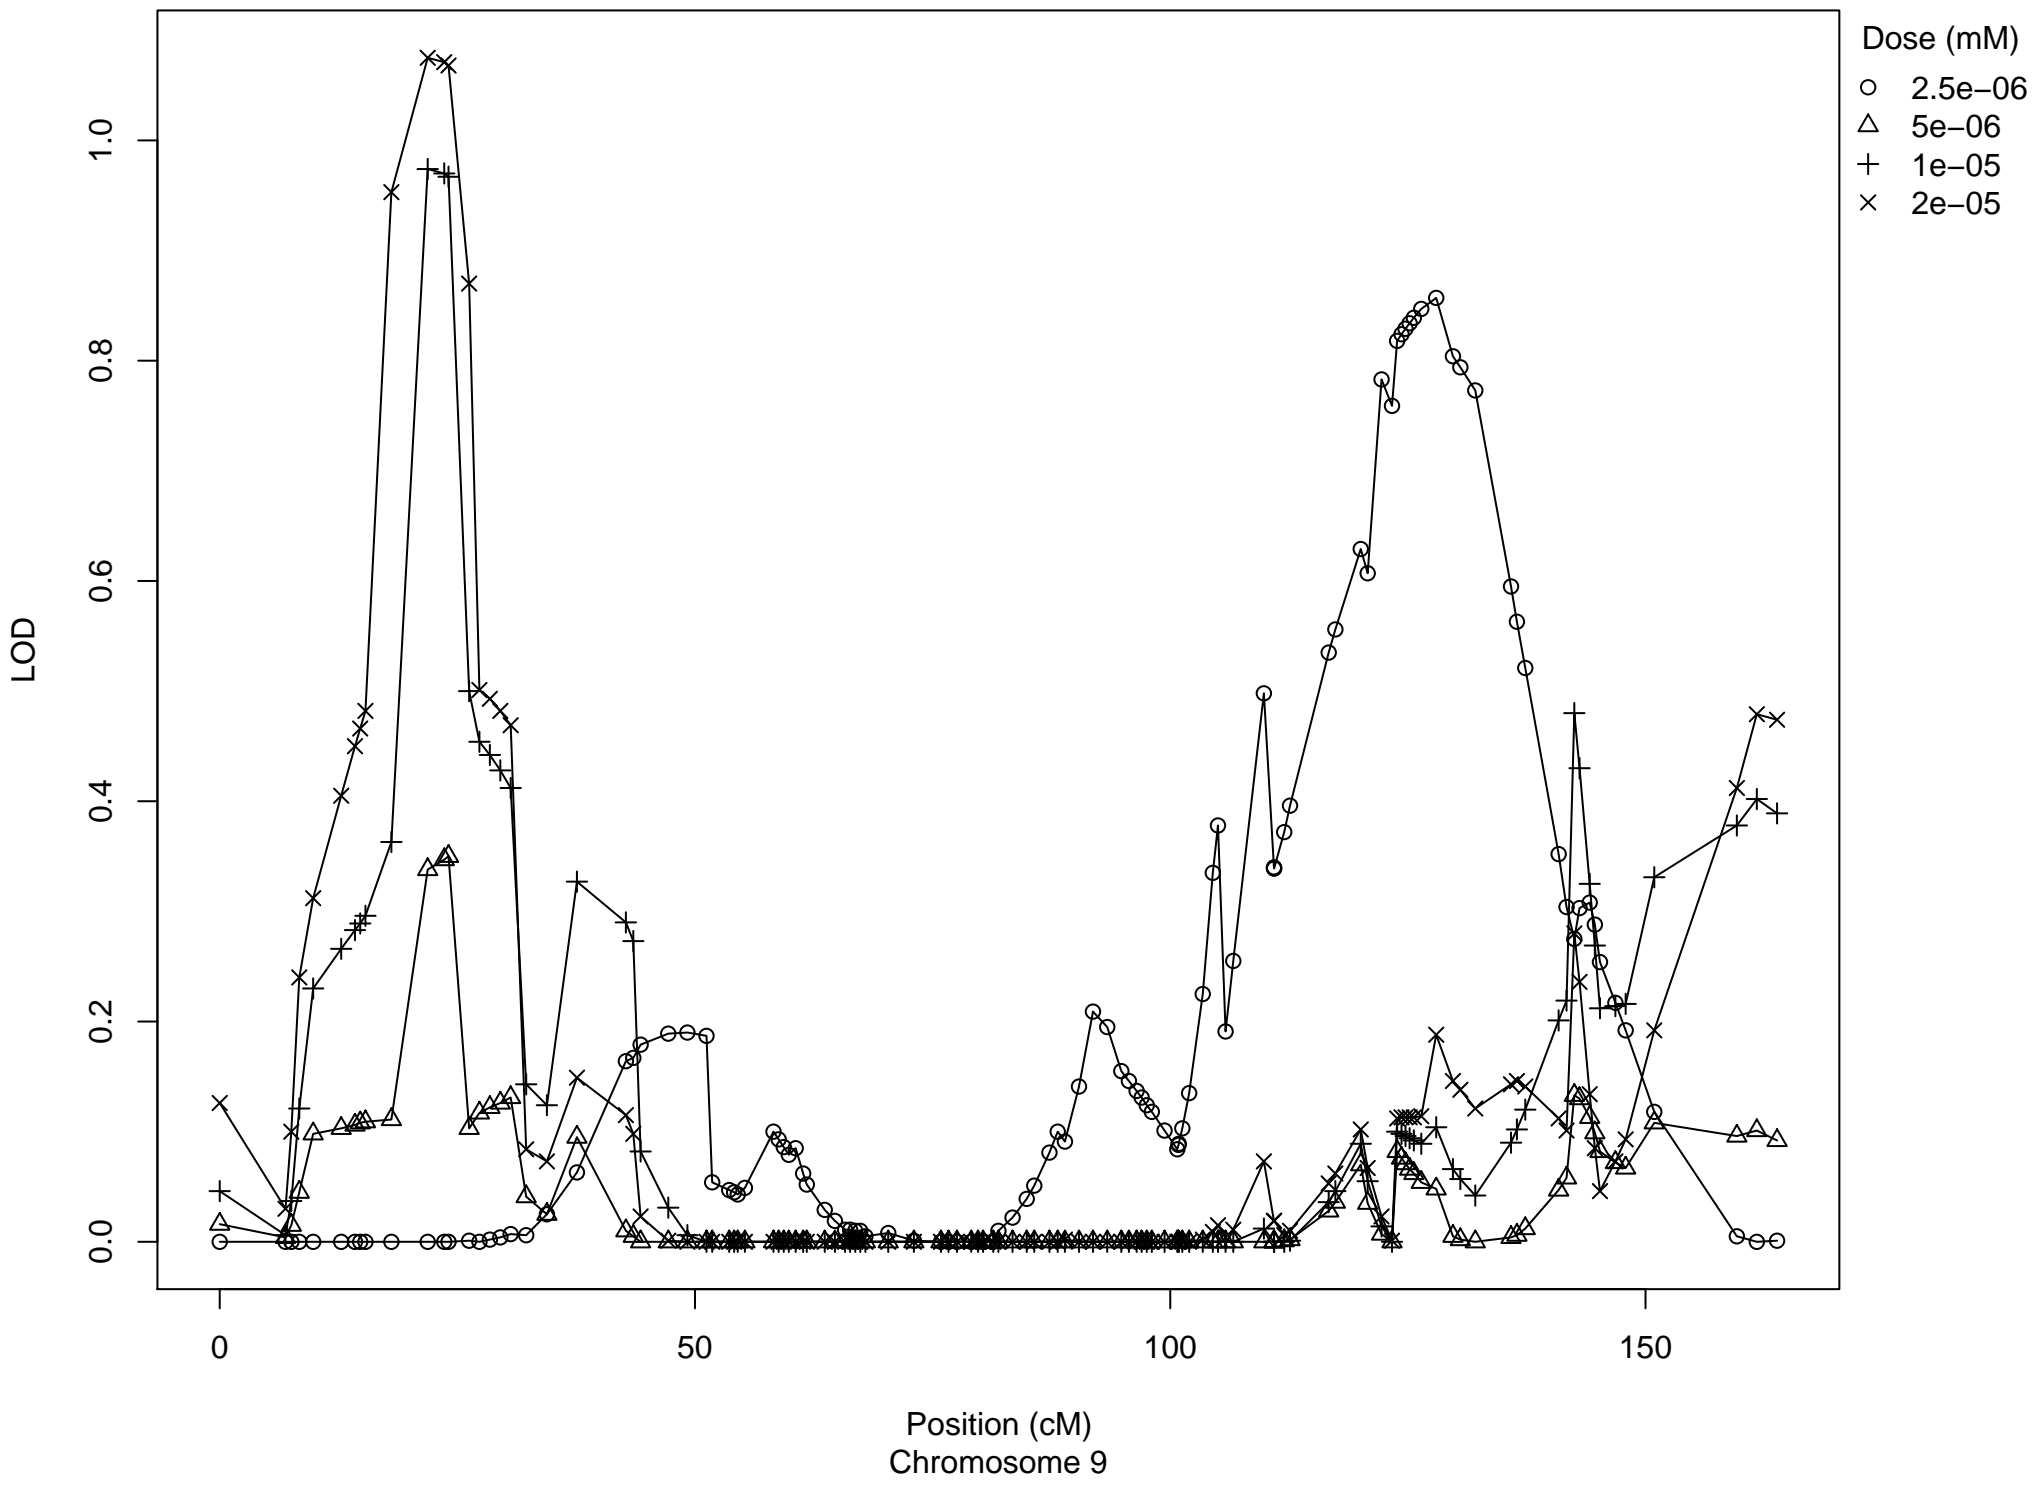

# Gemcitabine (Gem)

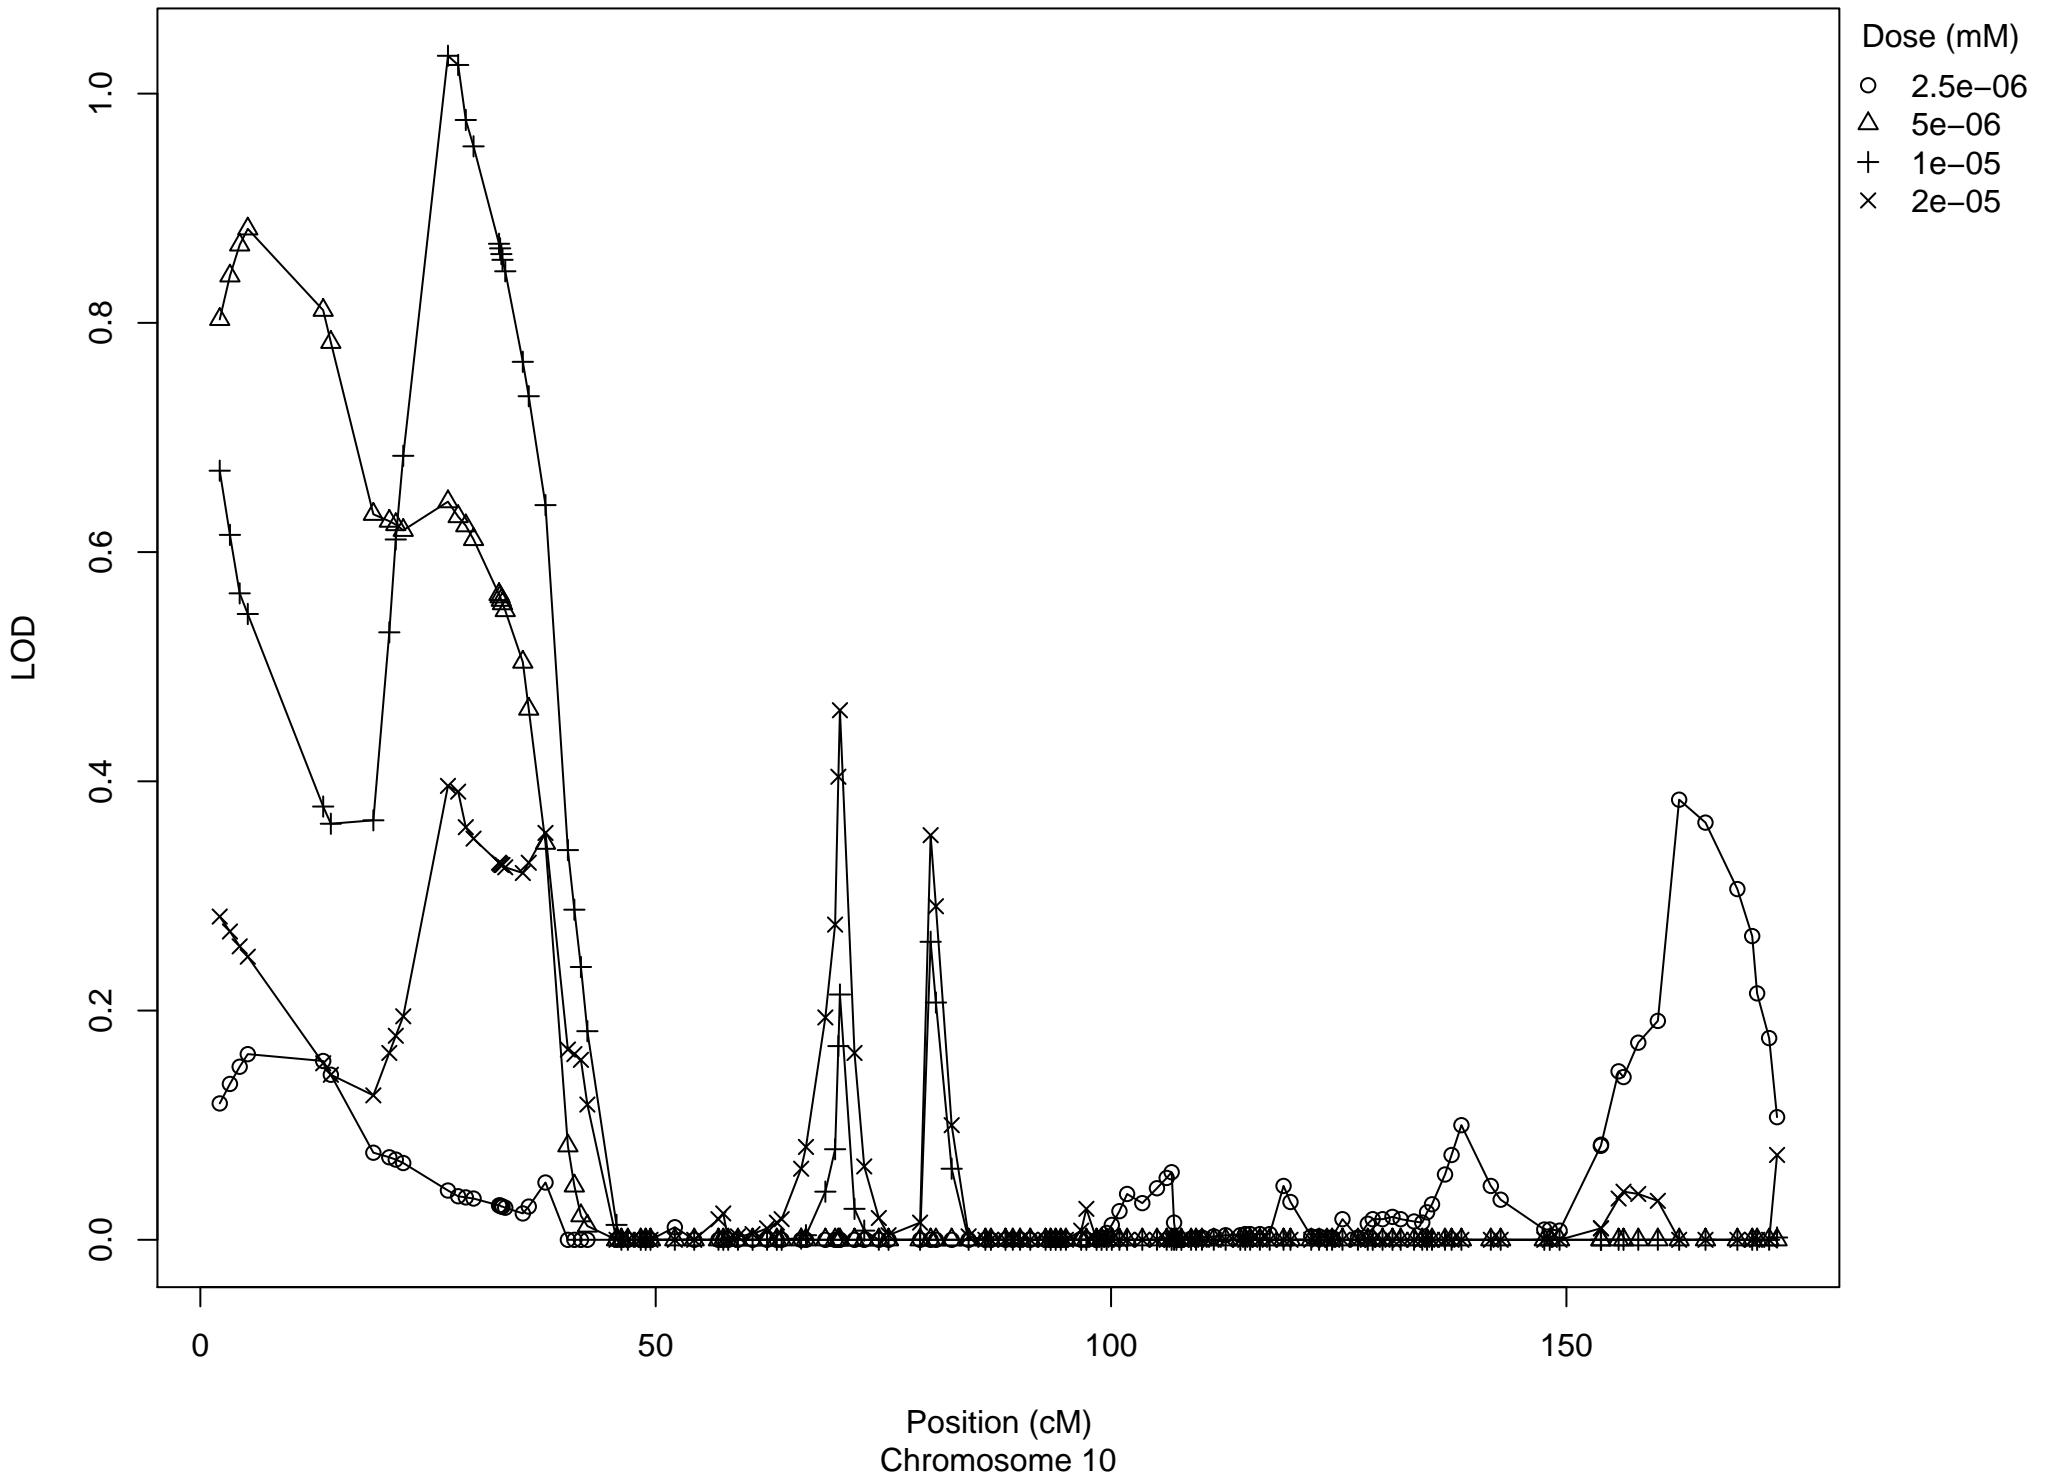

# Gemcitabine (Gem)

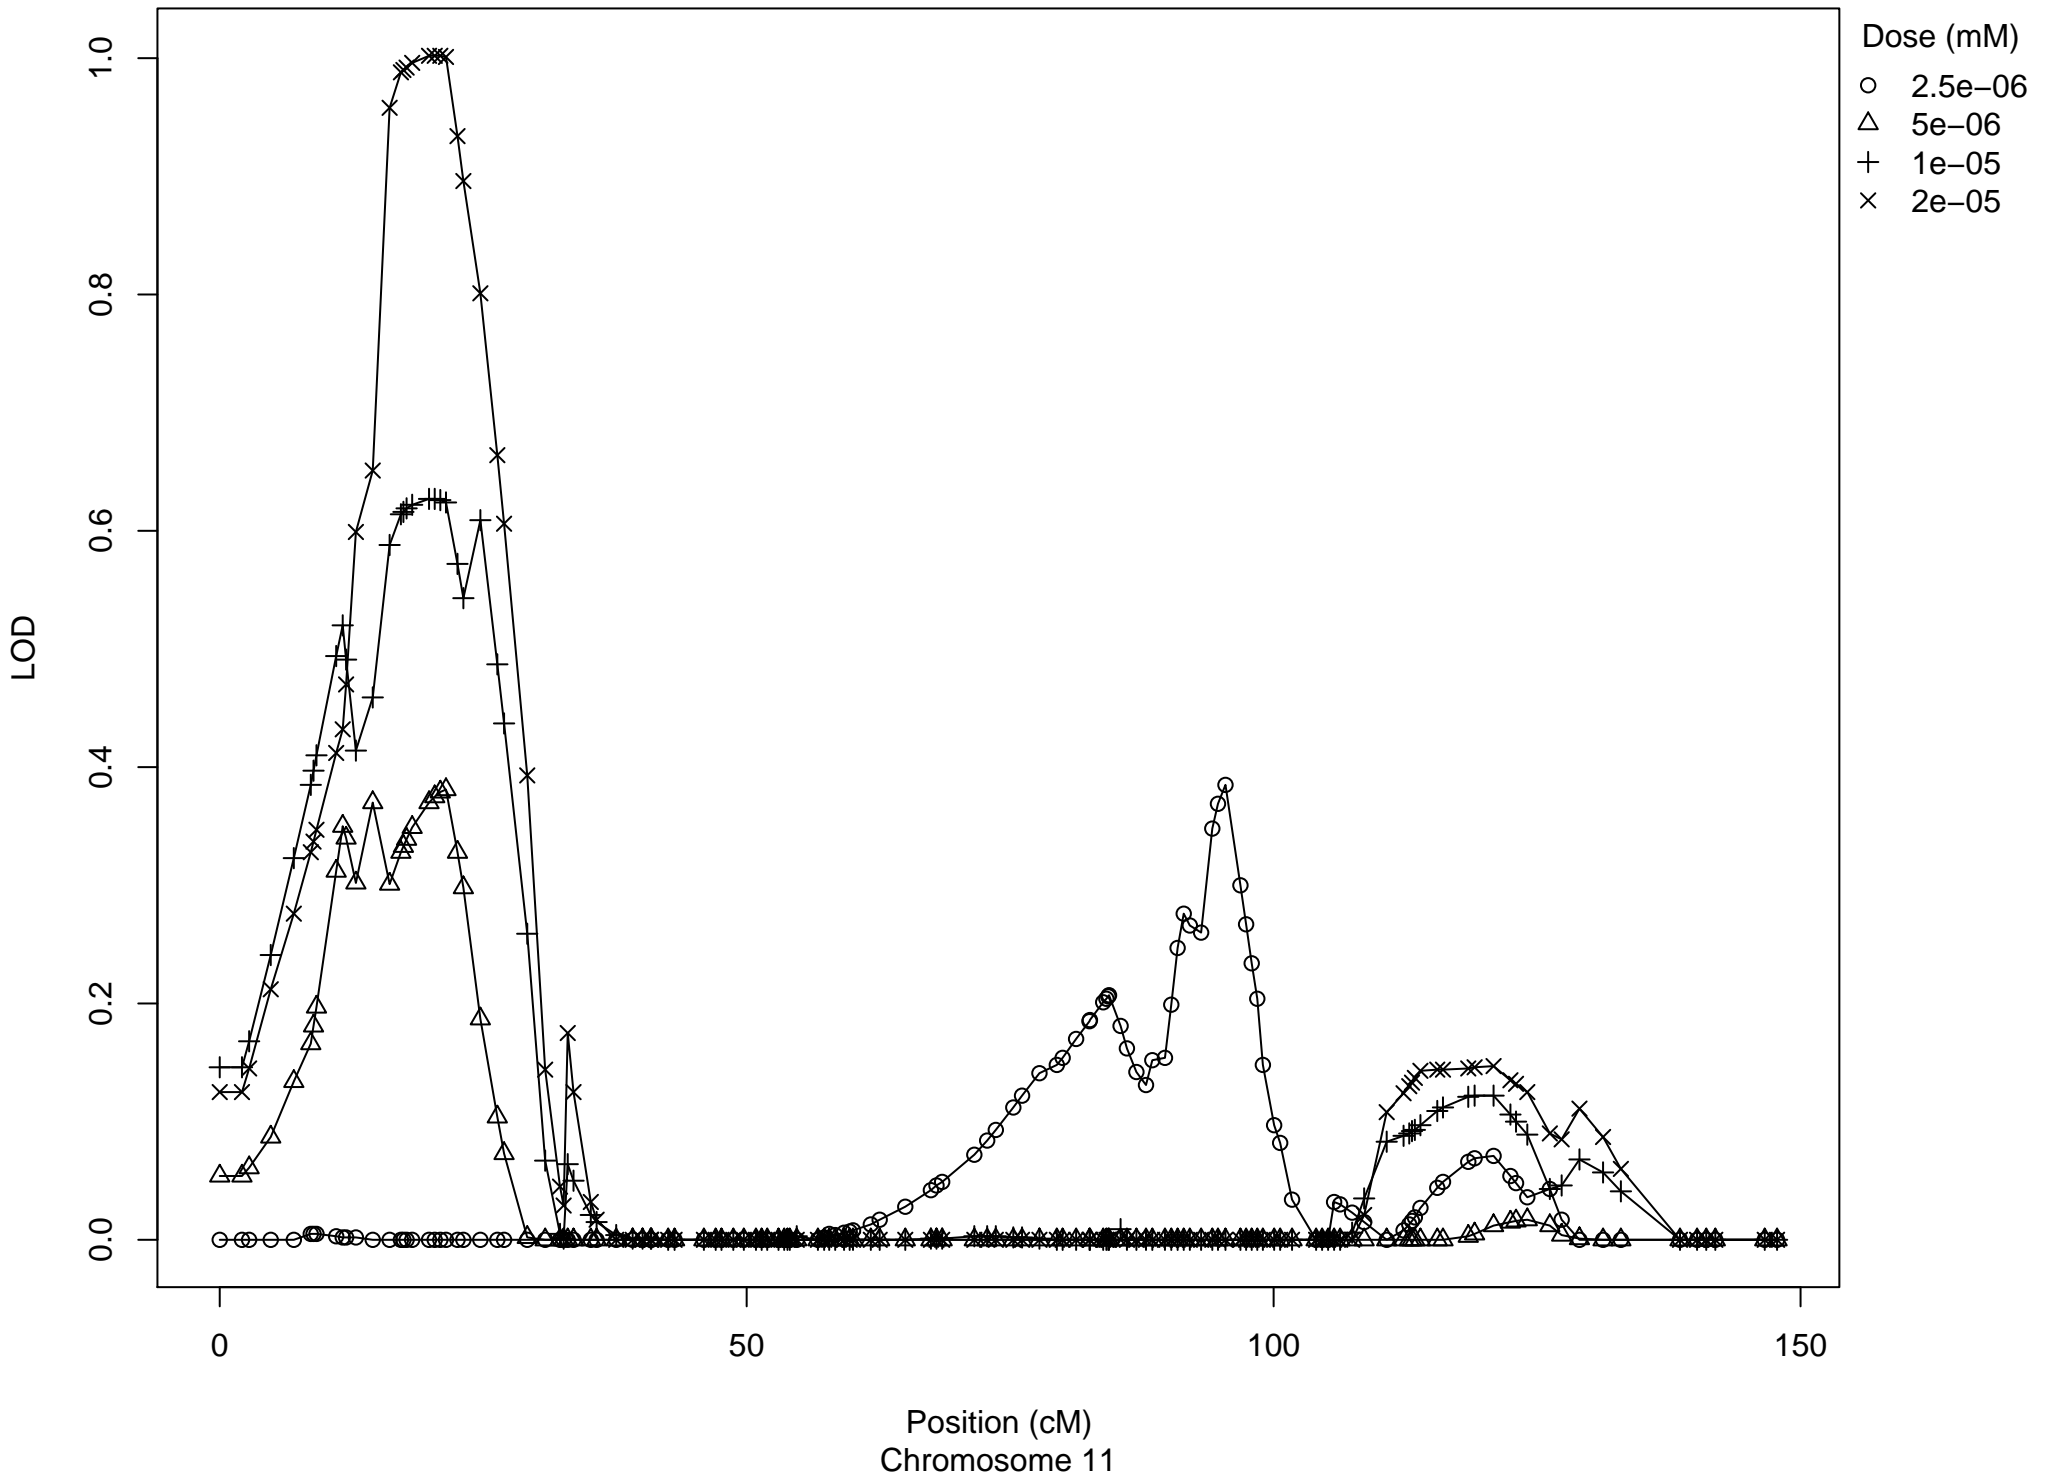

# Gemcitabine (Gem)

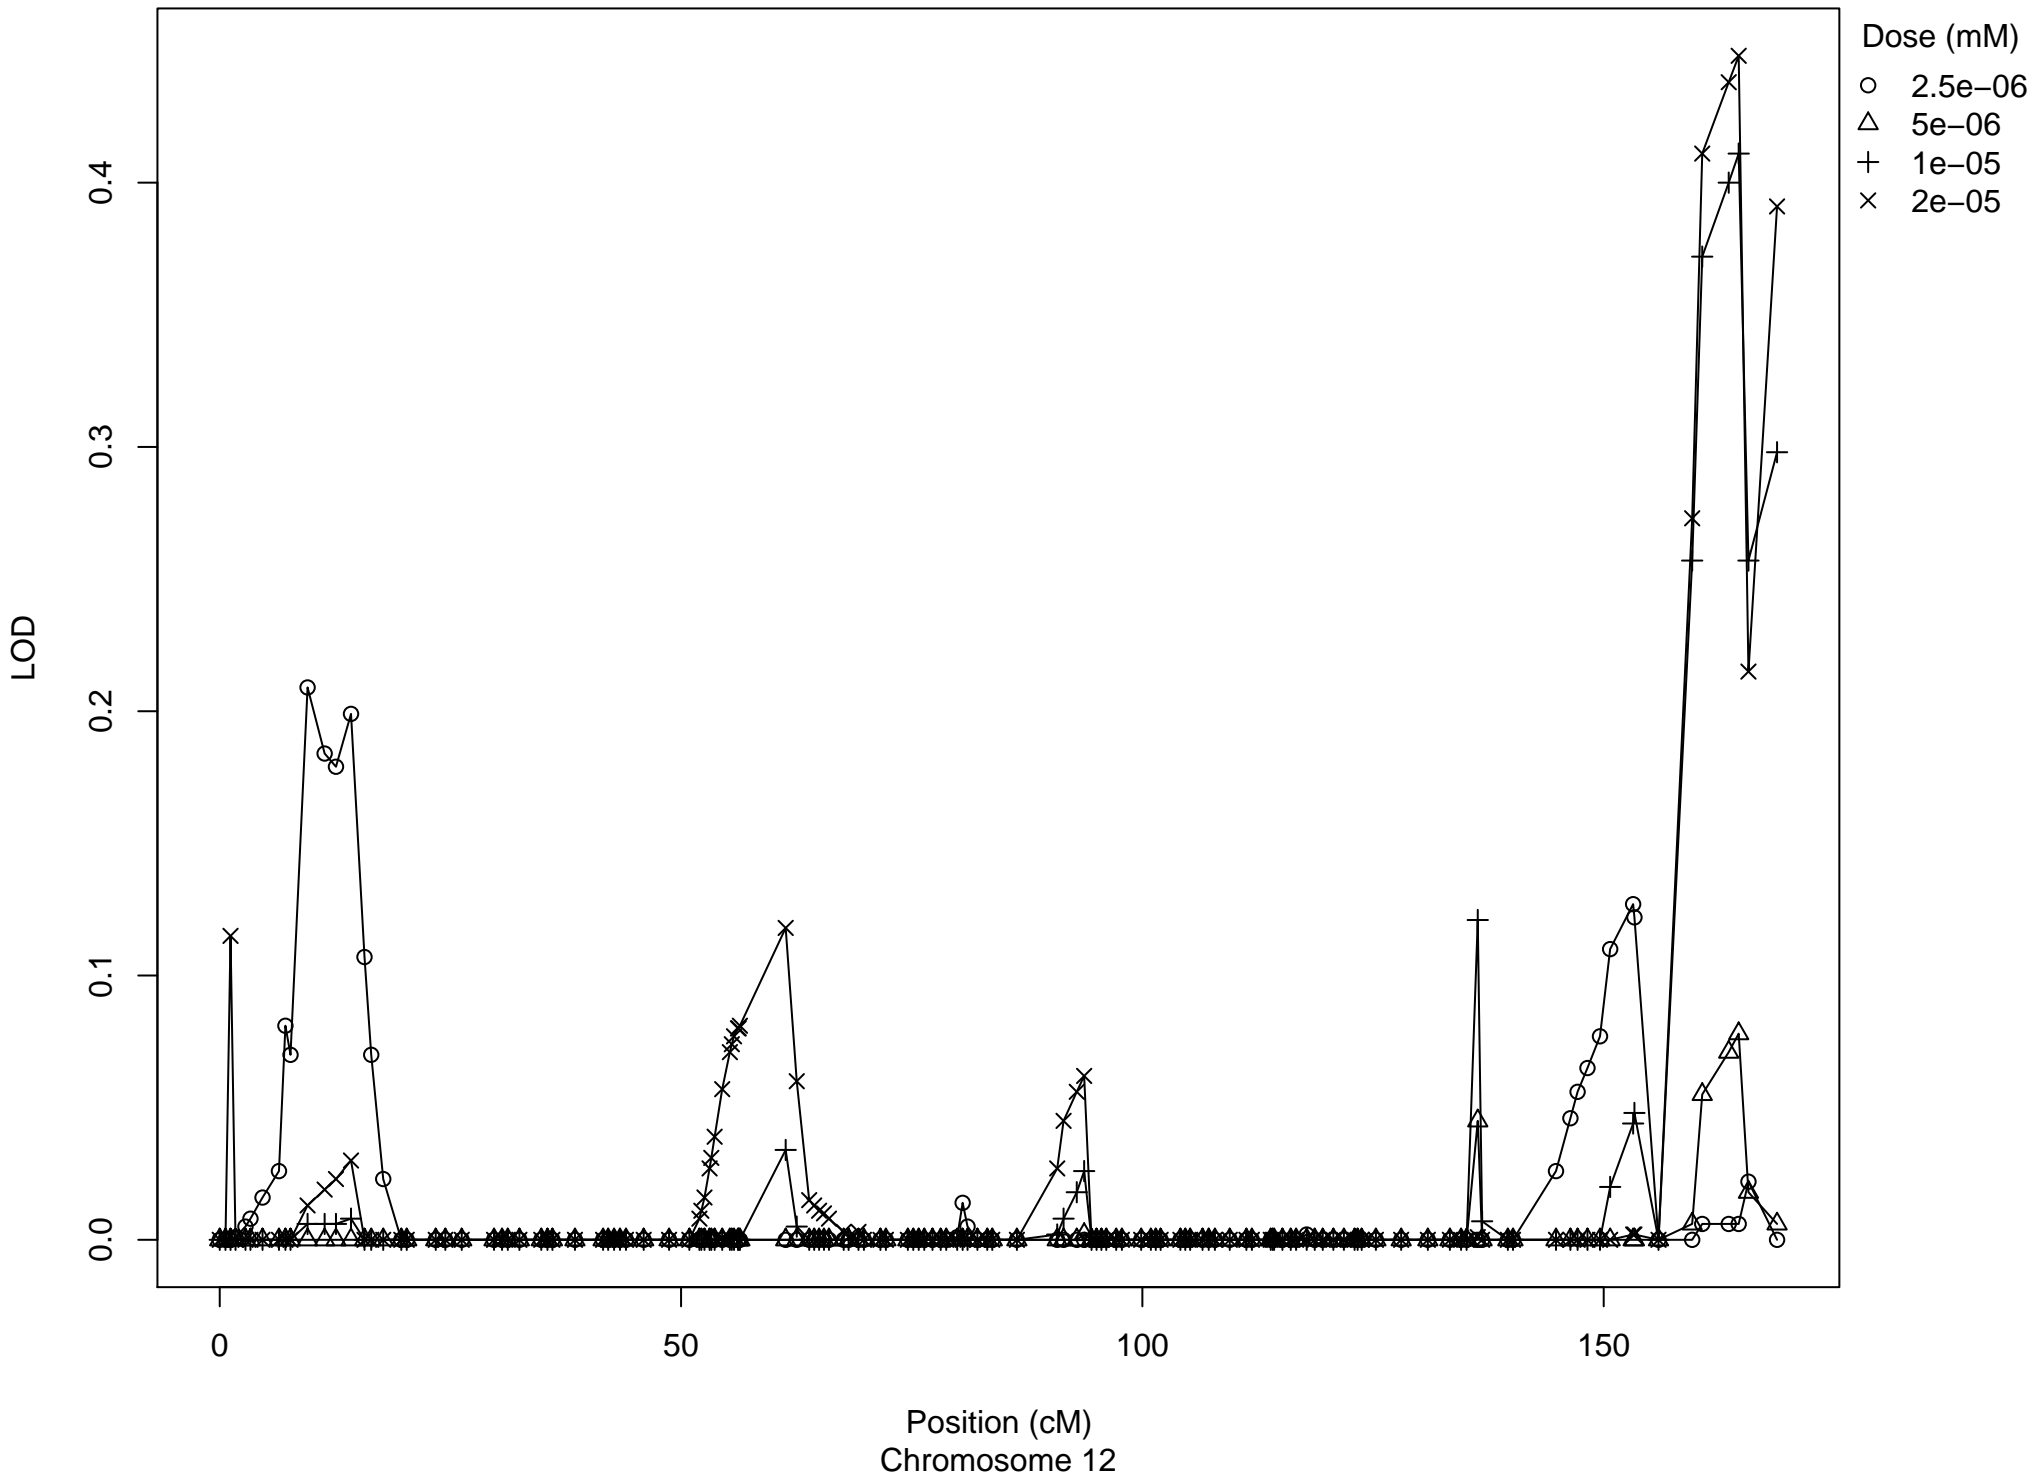

# Gemcitabine (Gem)

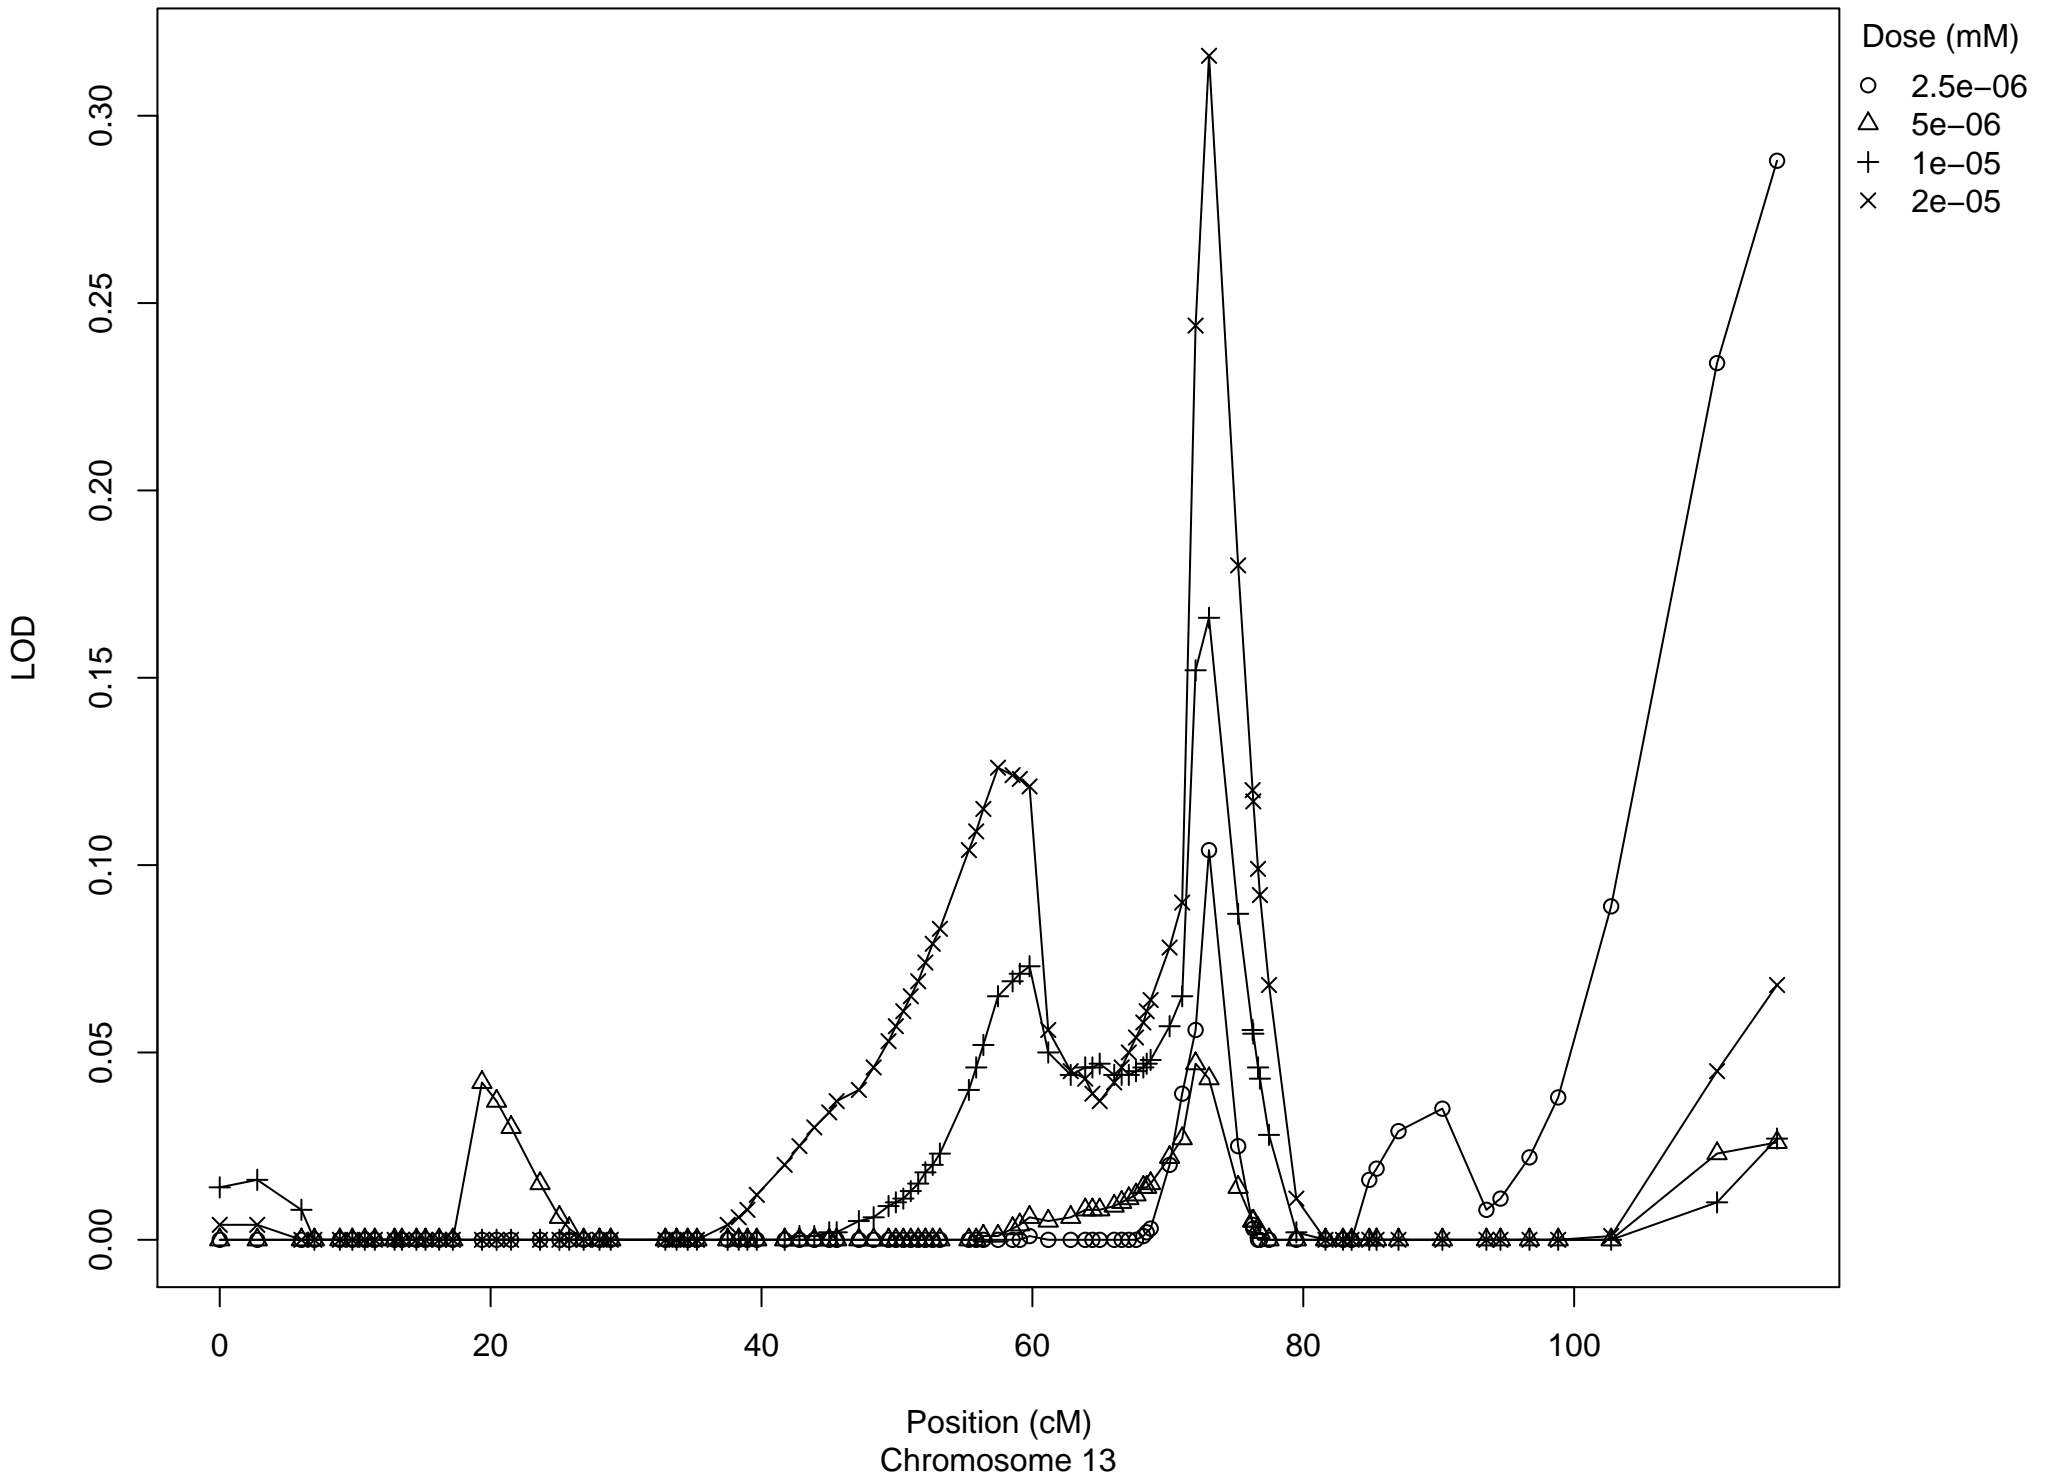

# Gemcitabine (Gem)

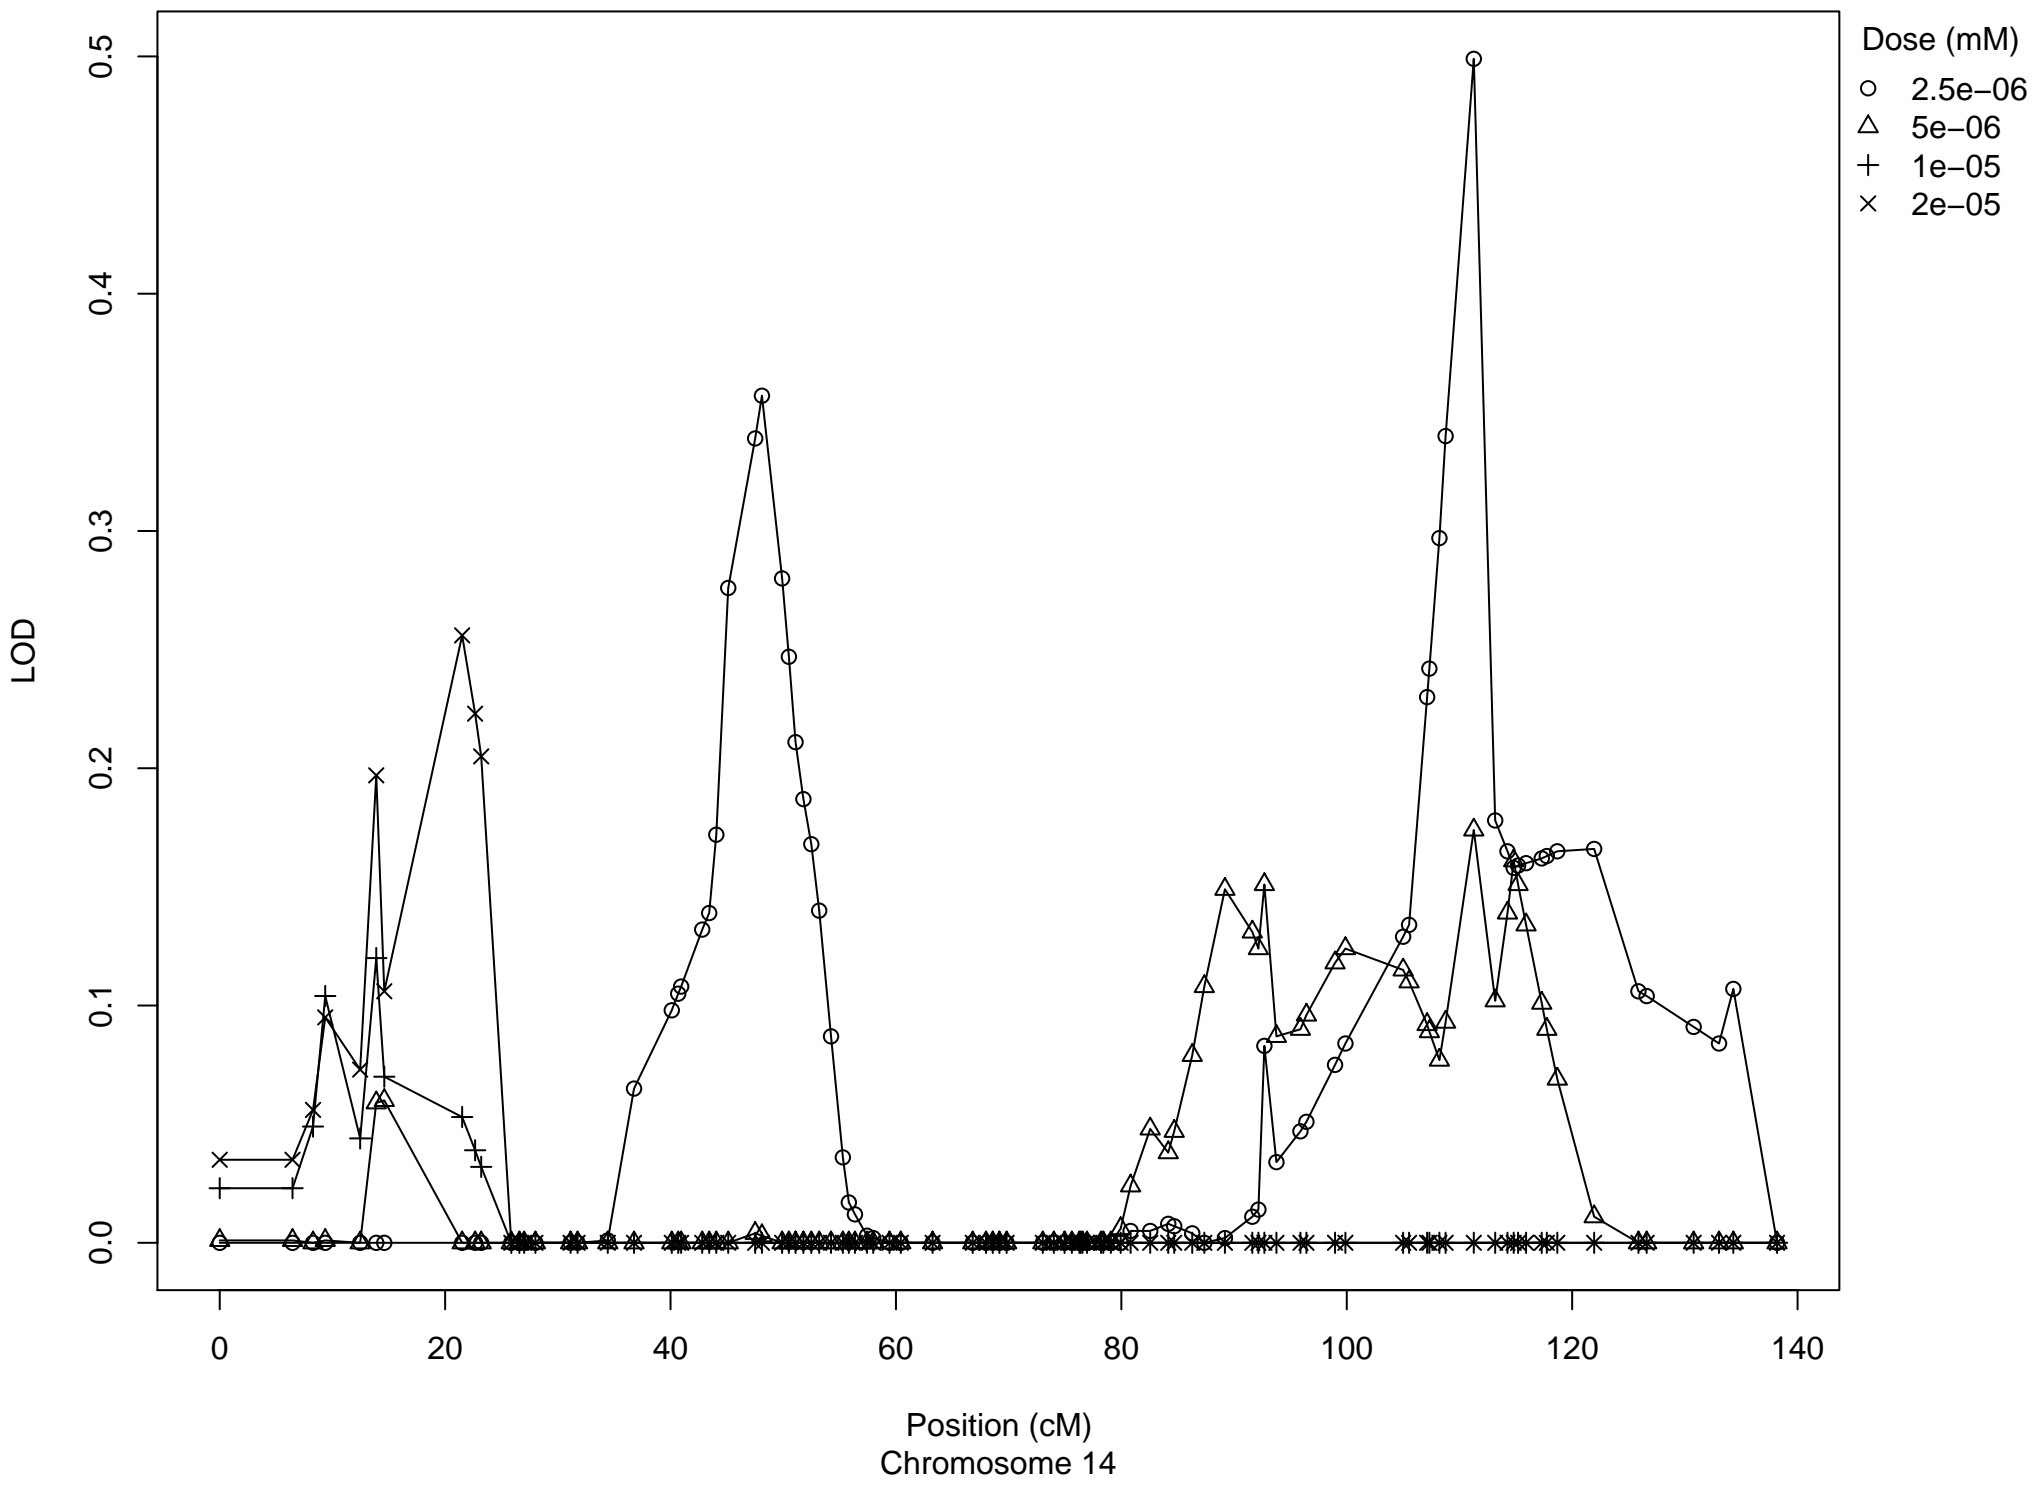



# Gemcitabine (Gem)

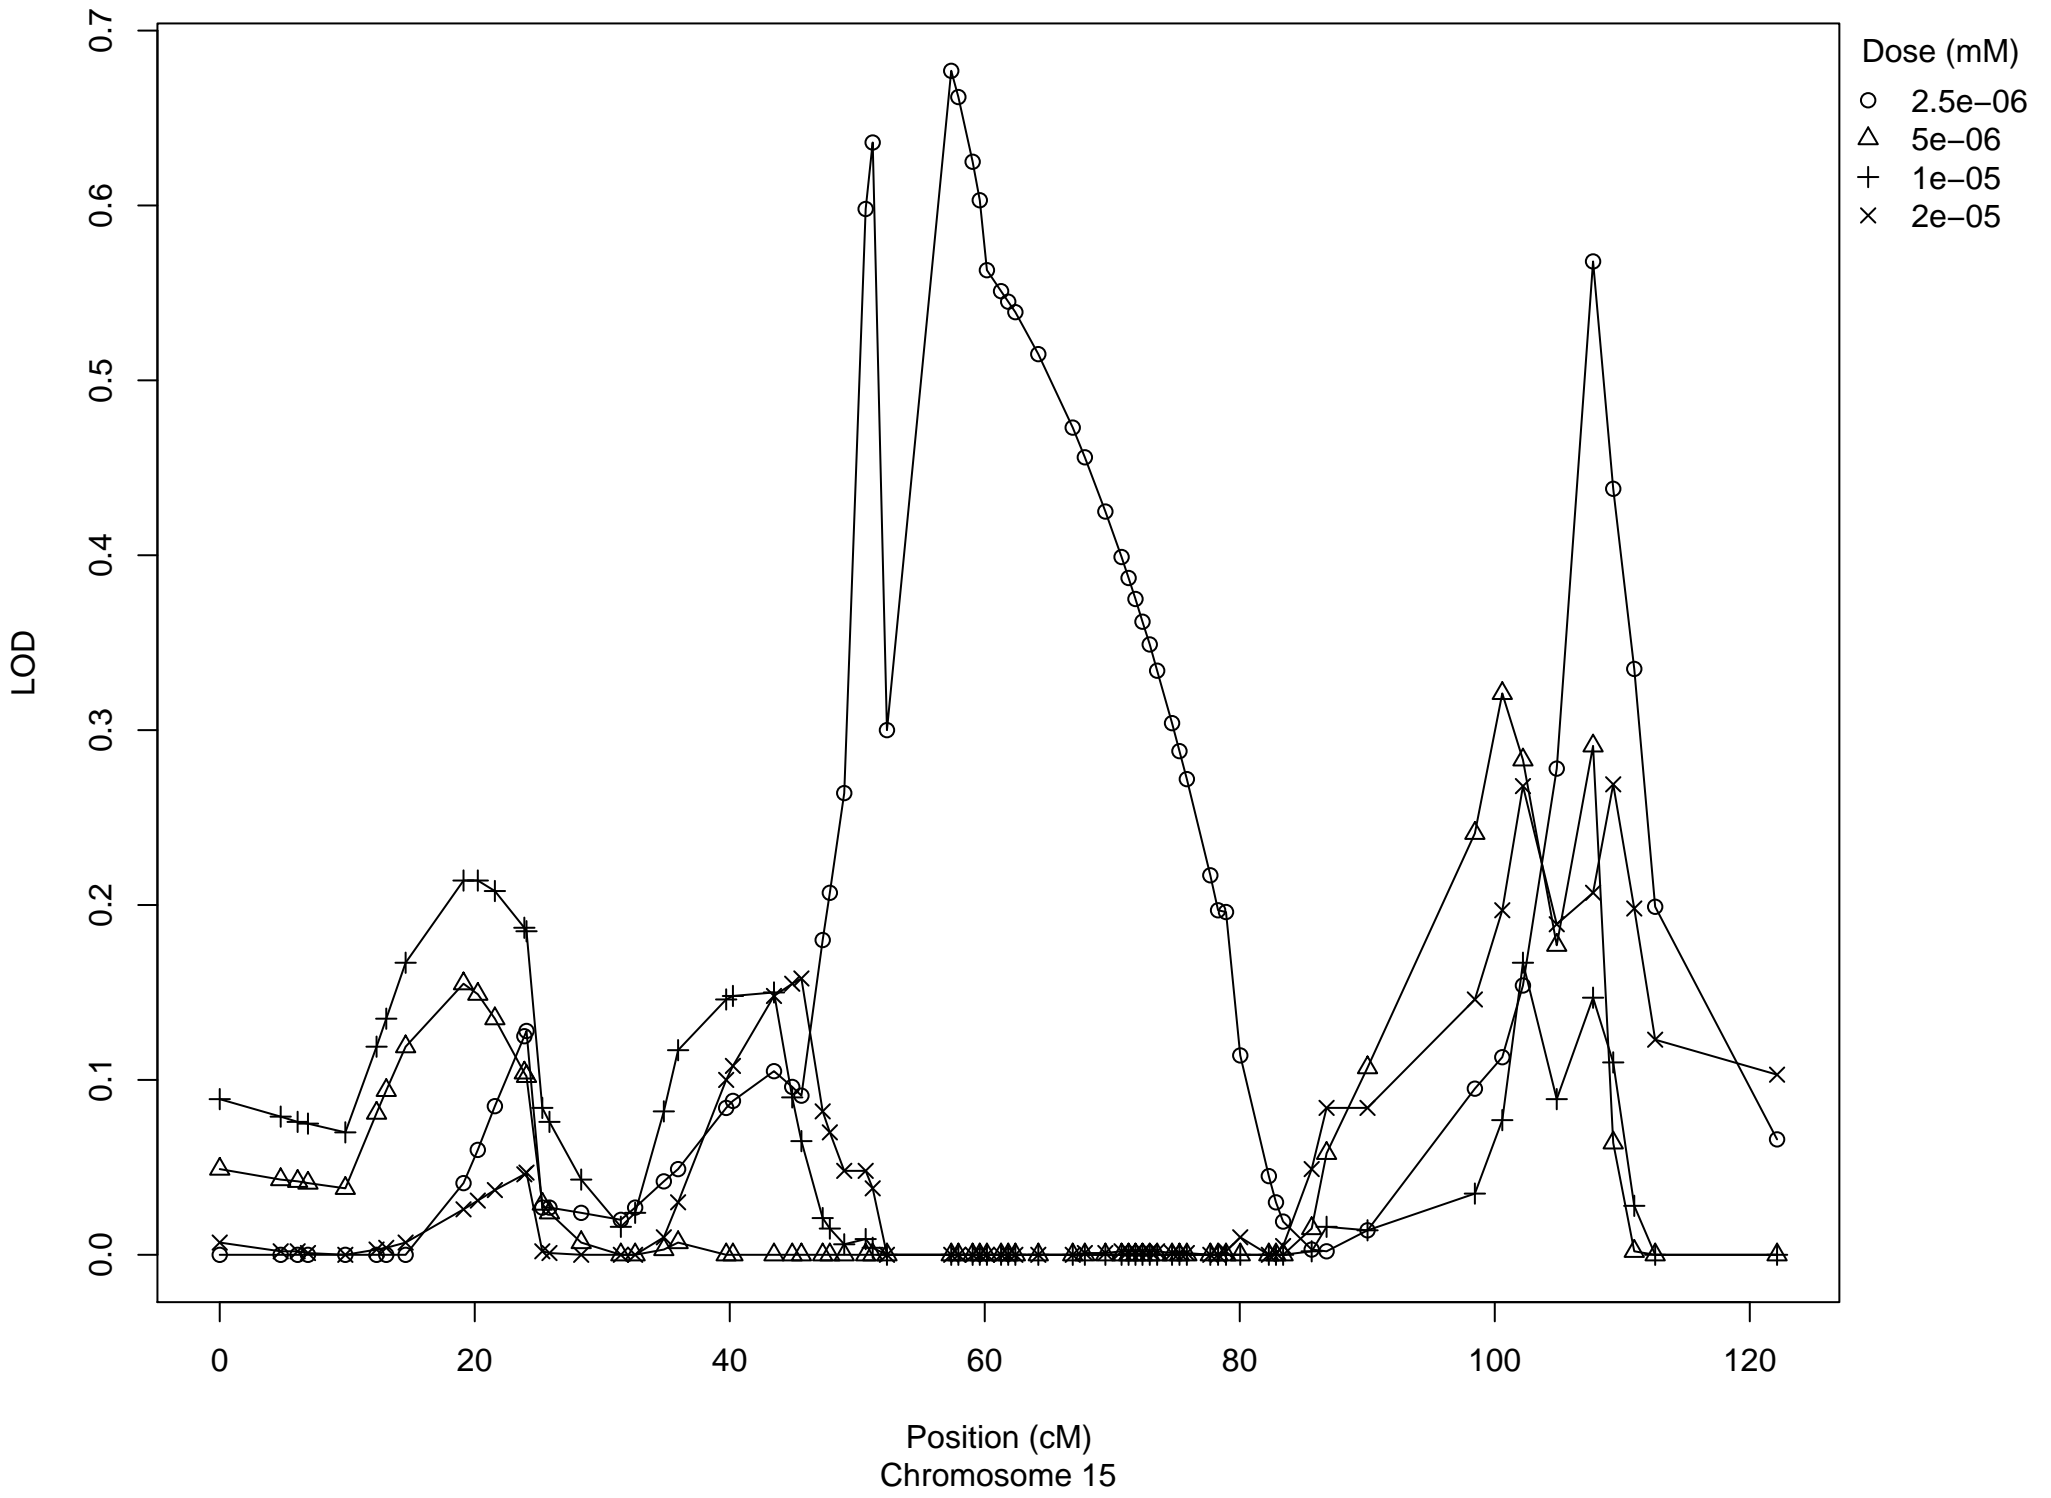

# Gemcitabine (Gem)

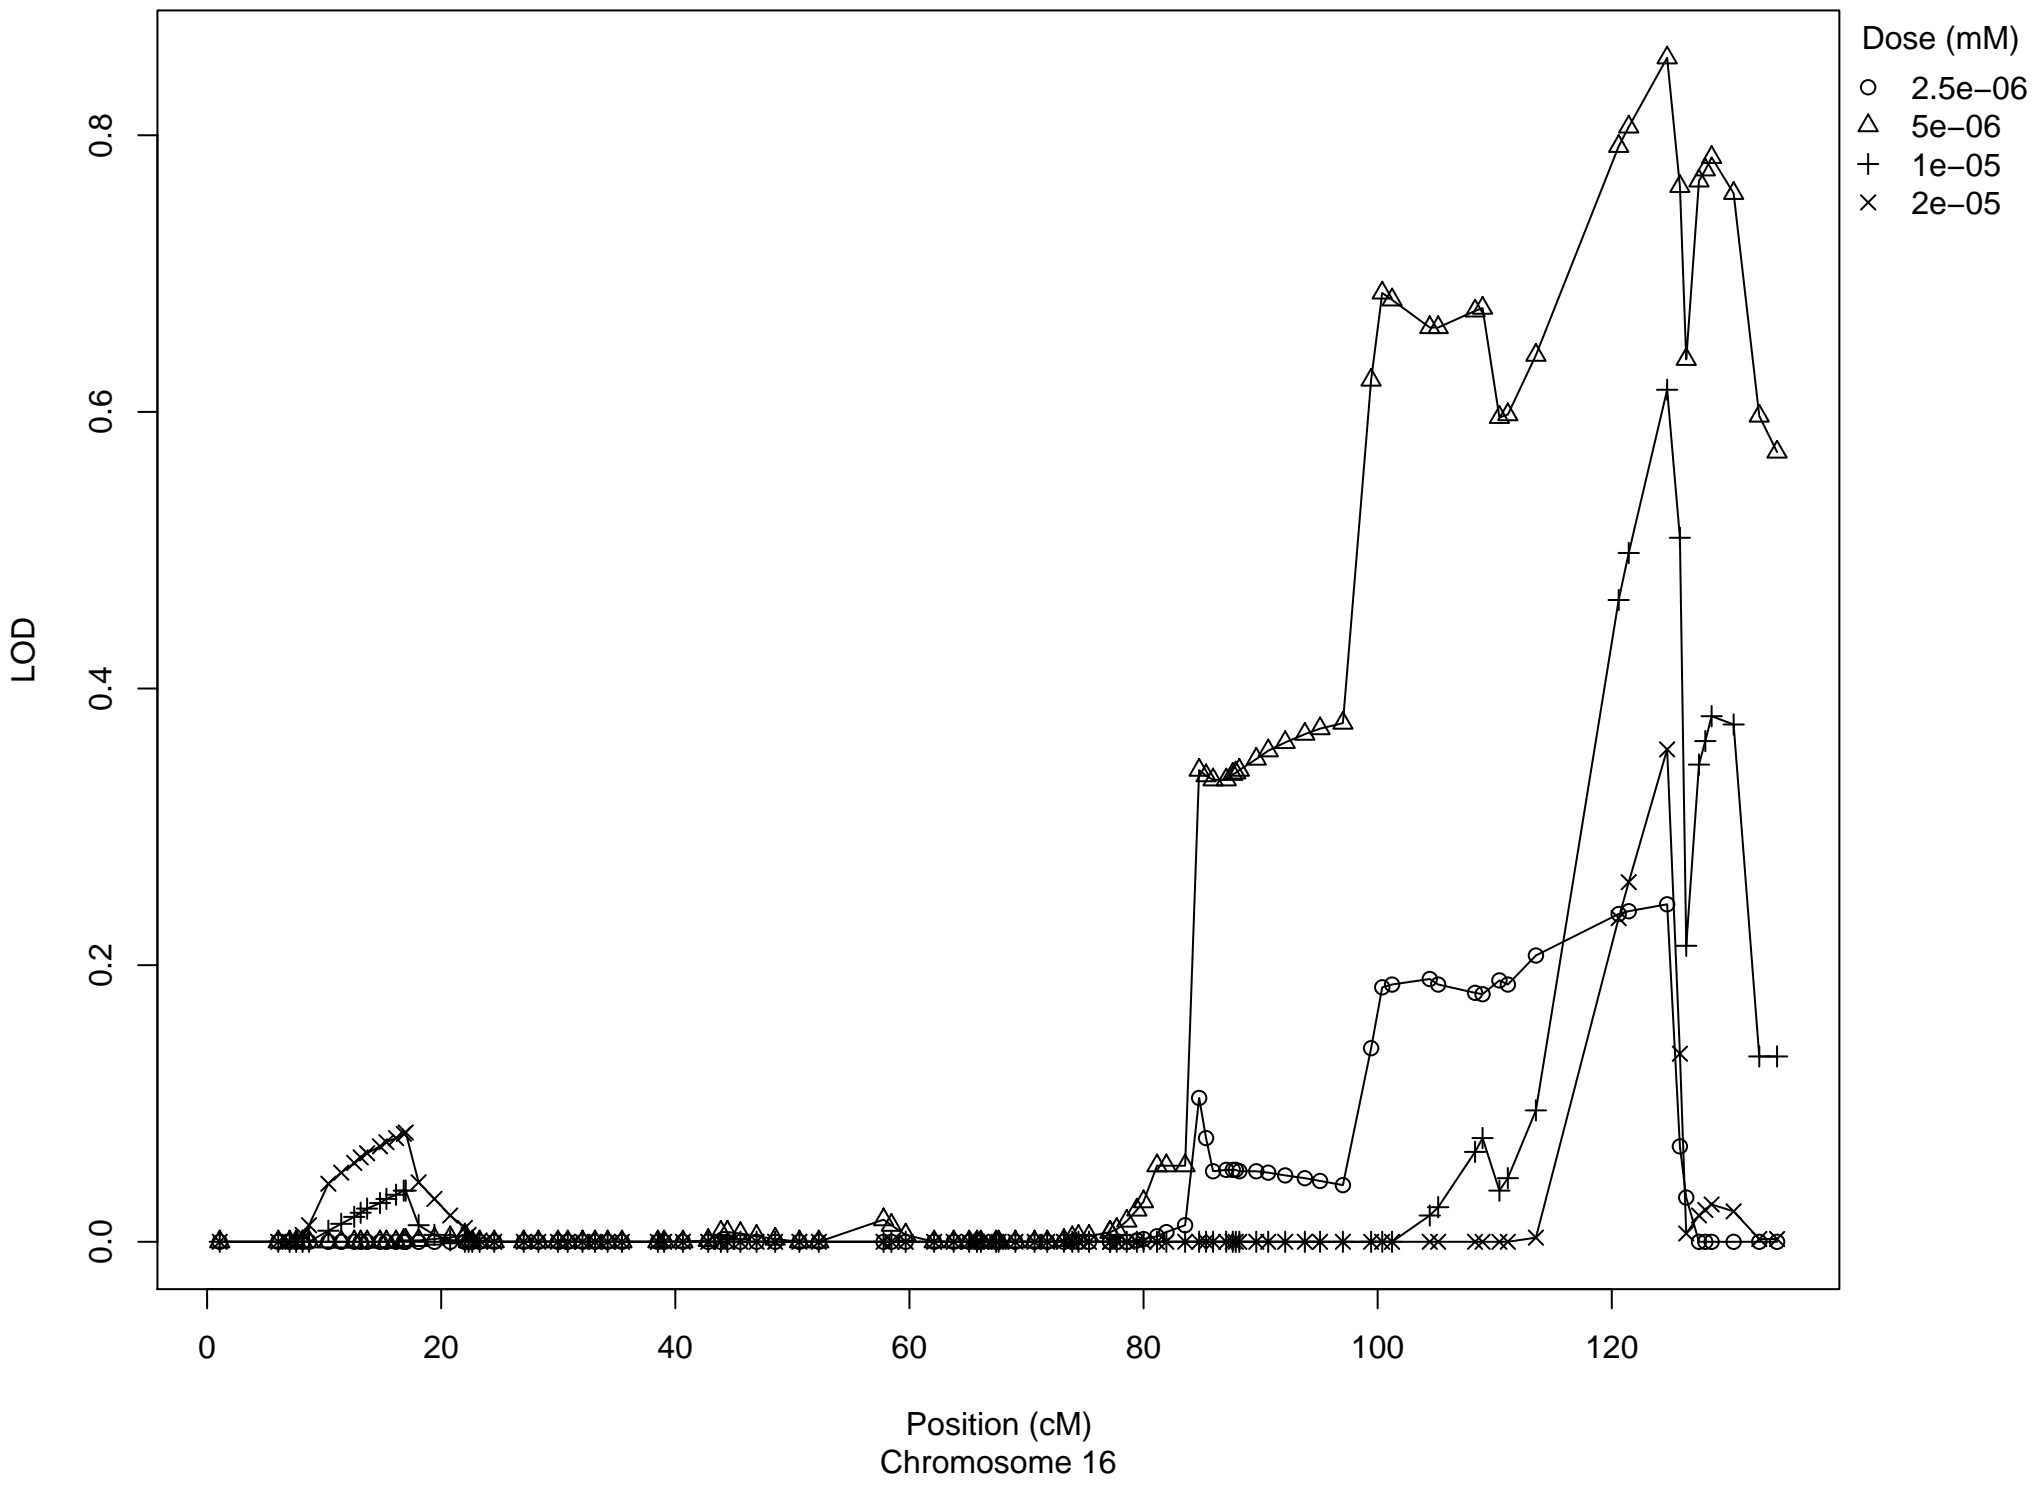

# Gemcitabine (Gem)

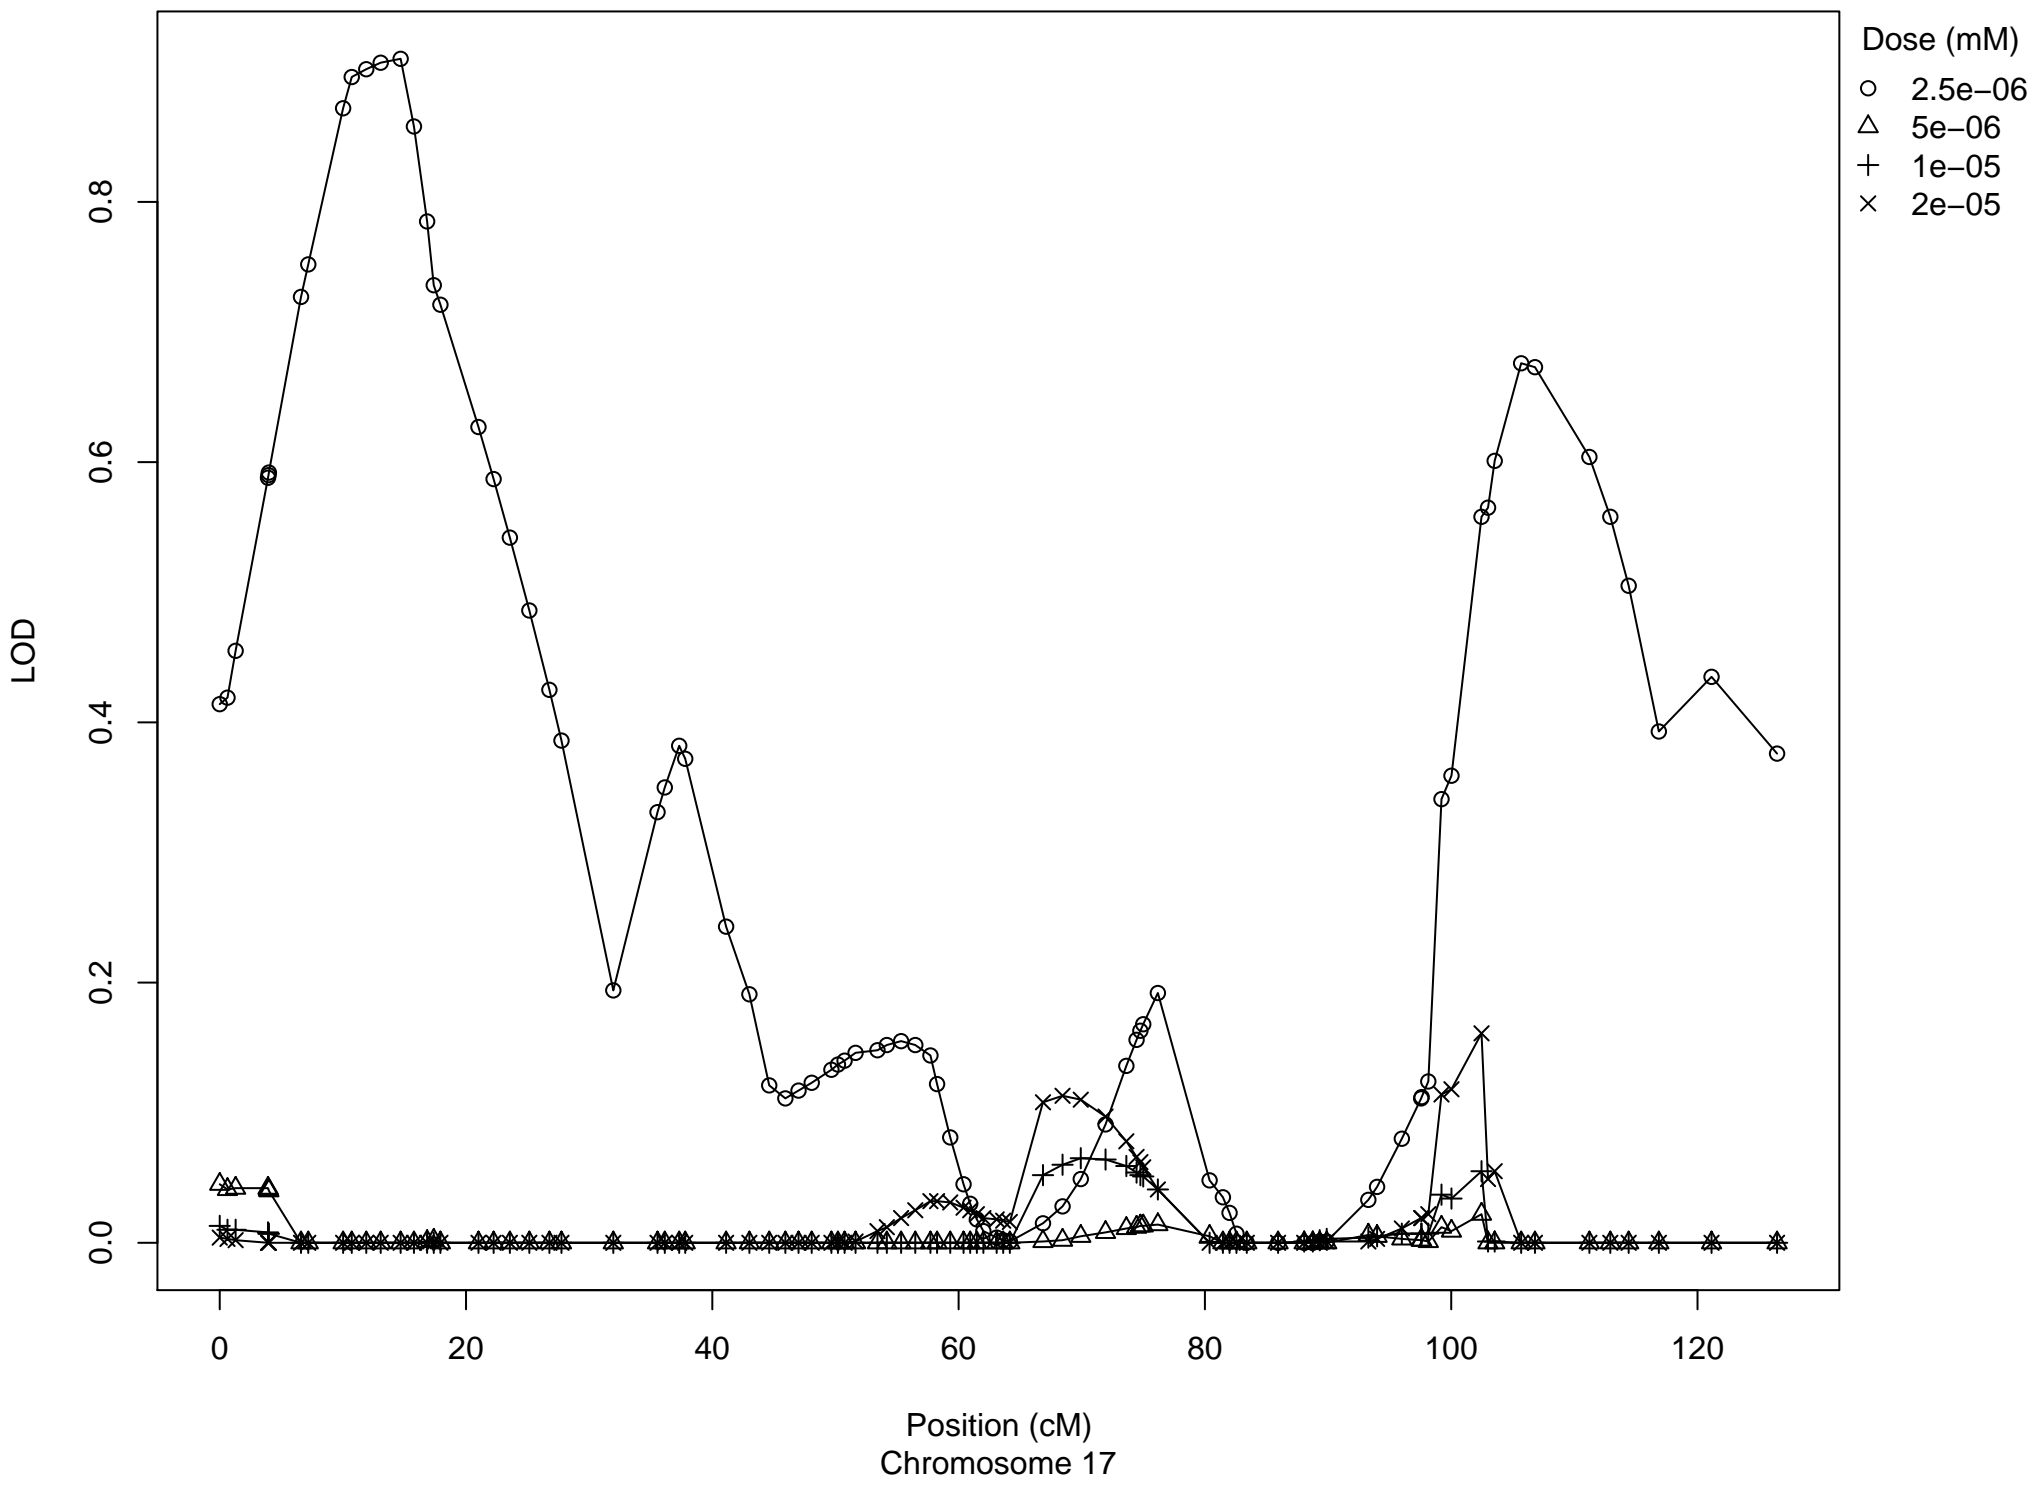

# Gemcitabine (Gem)

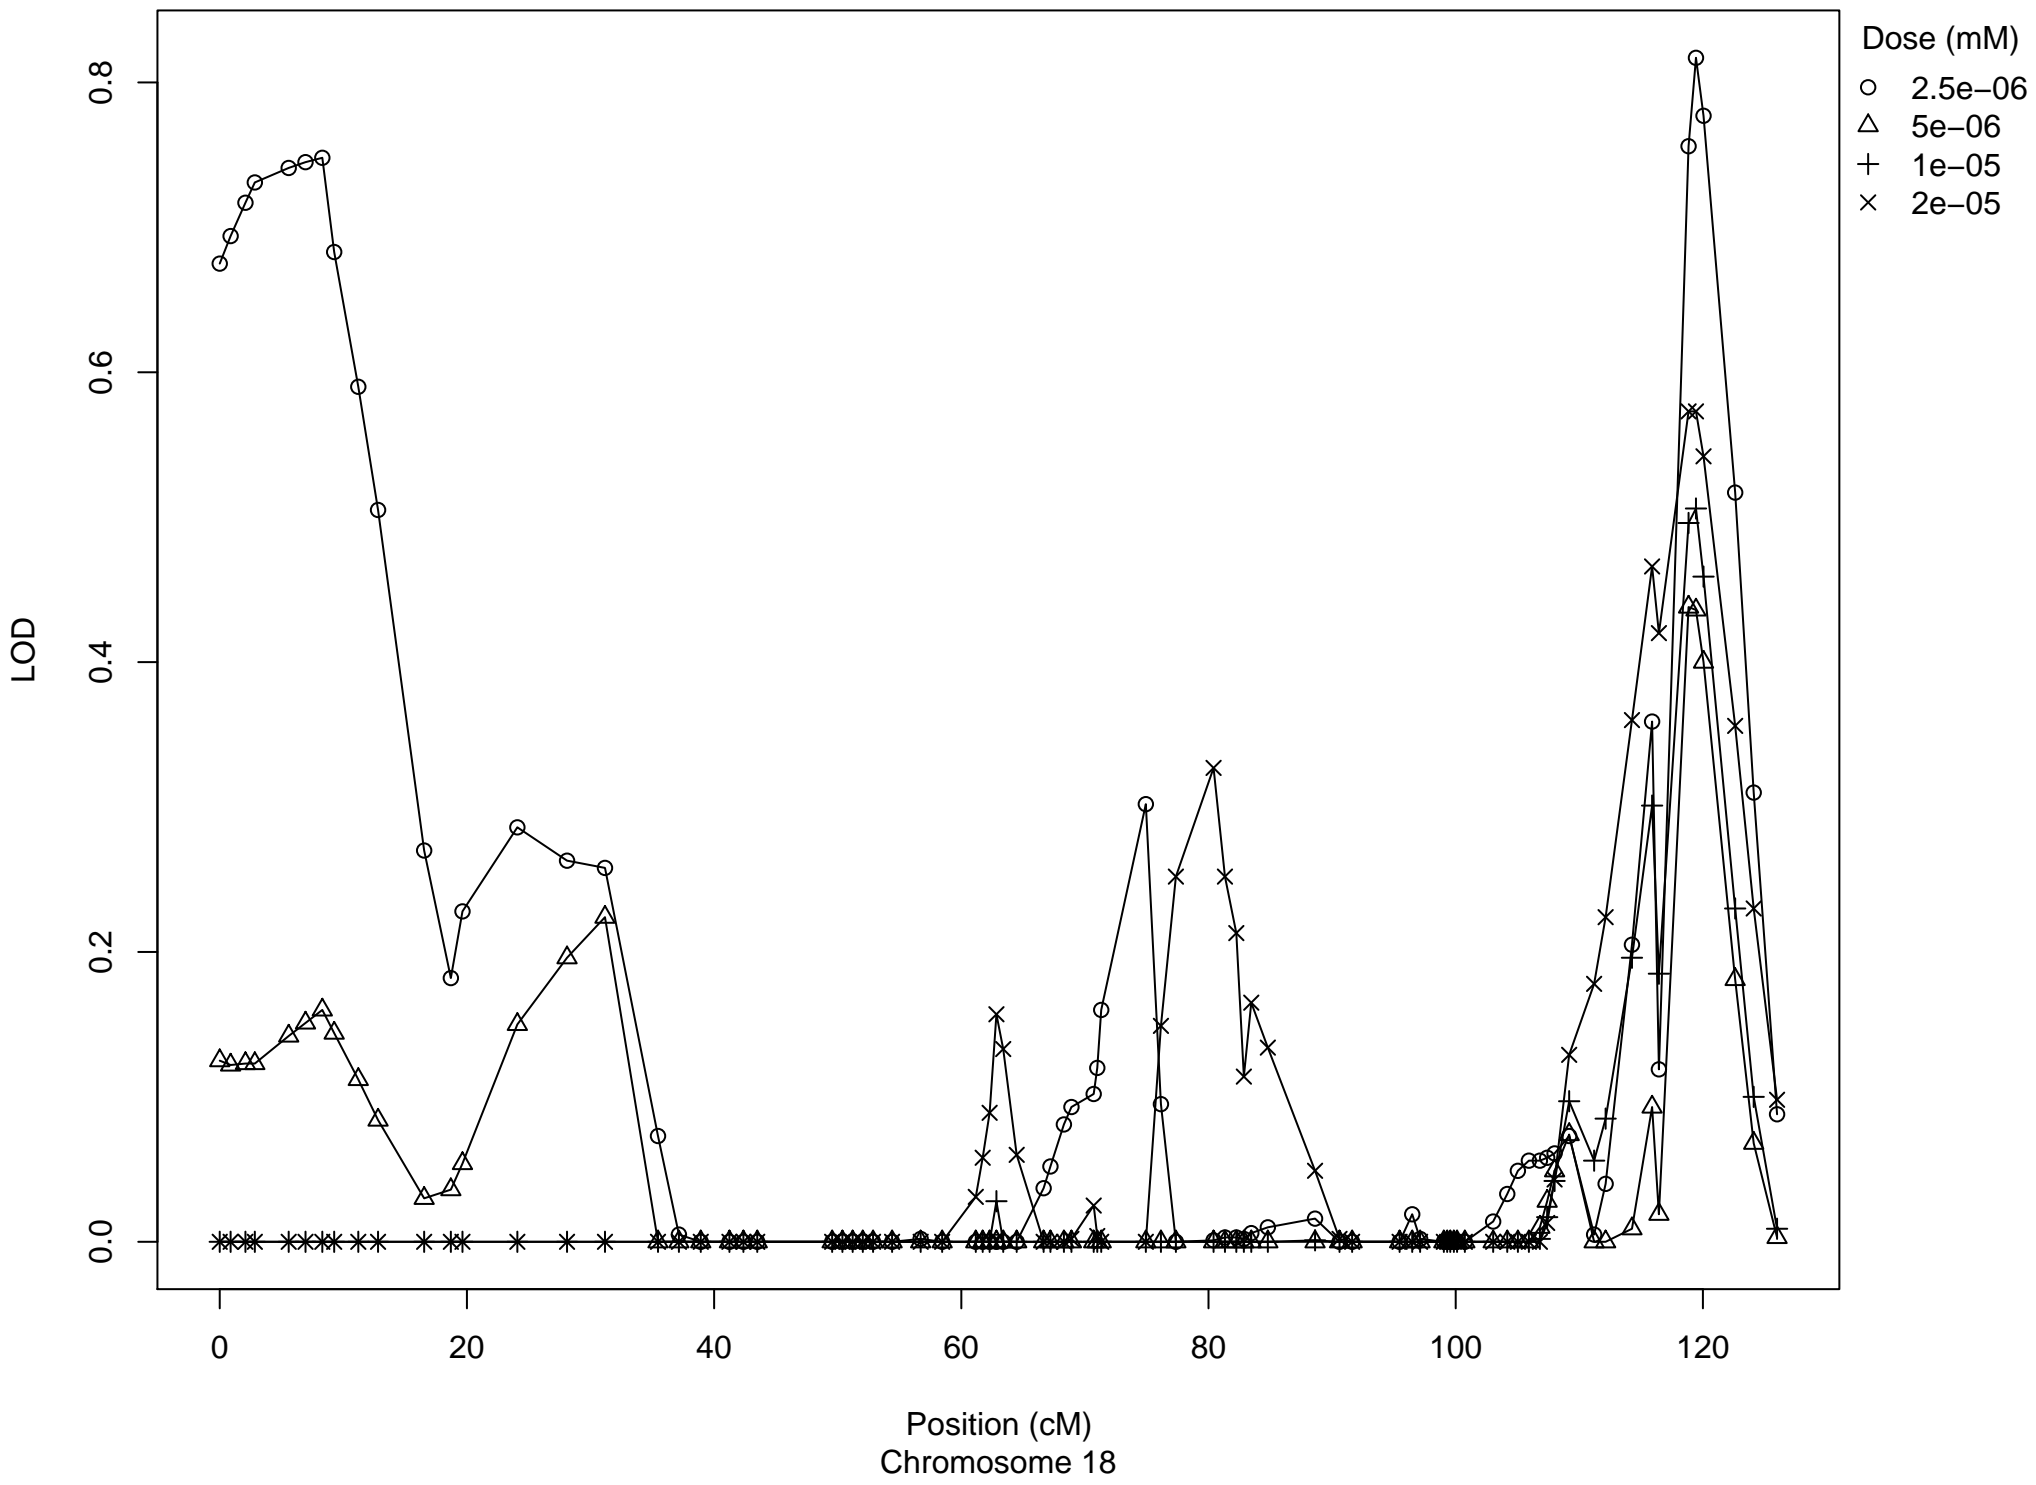

# Gemcitabine (Gem)

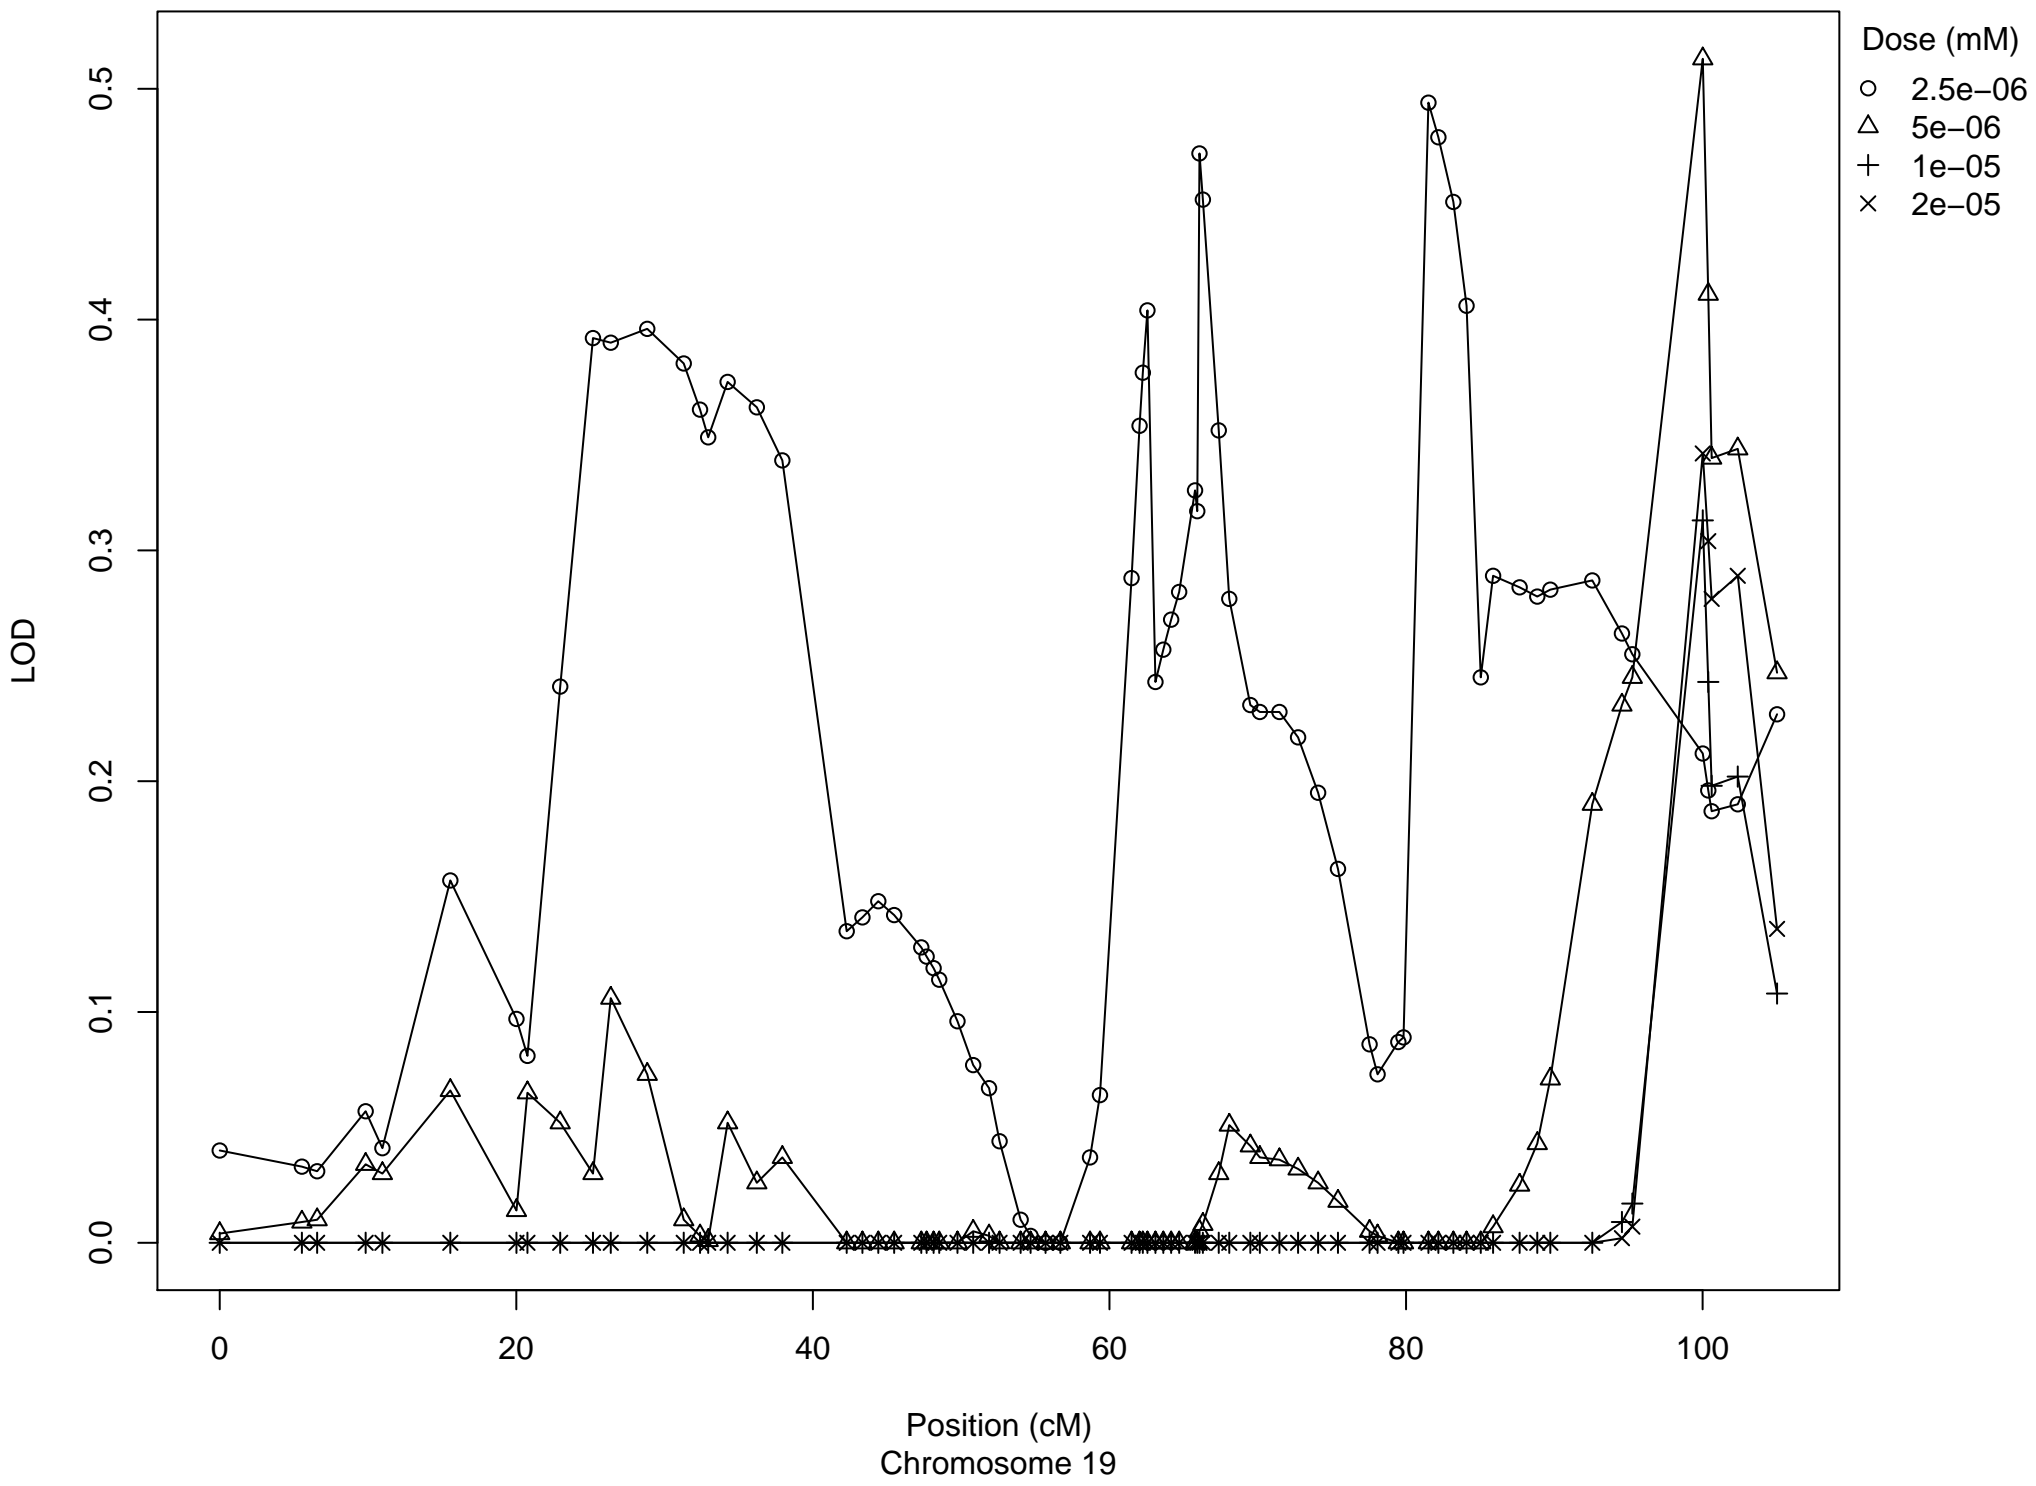

# Gemcitabine (Gem)

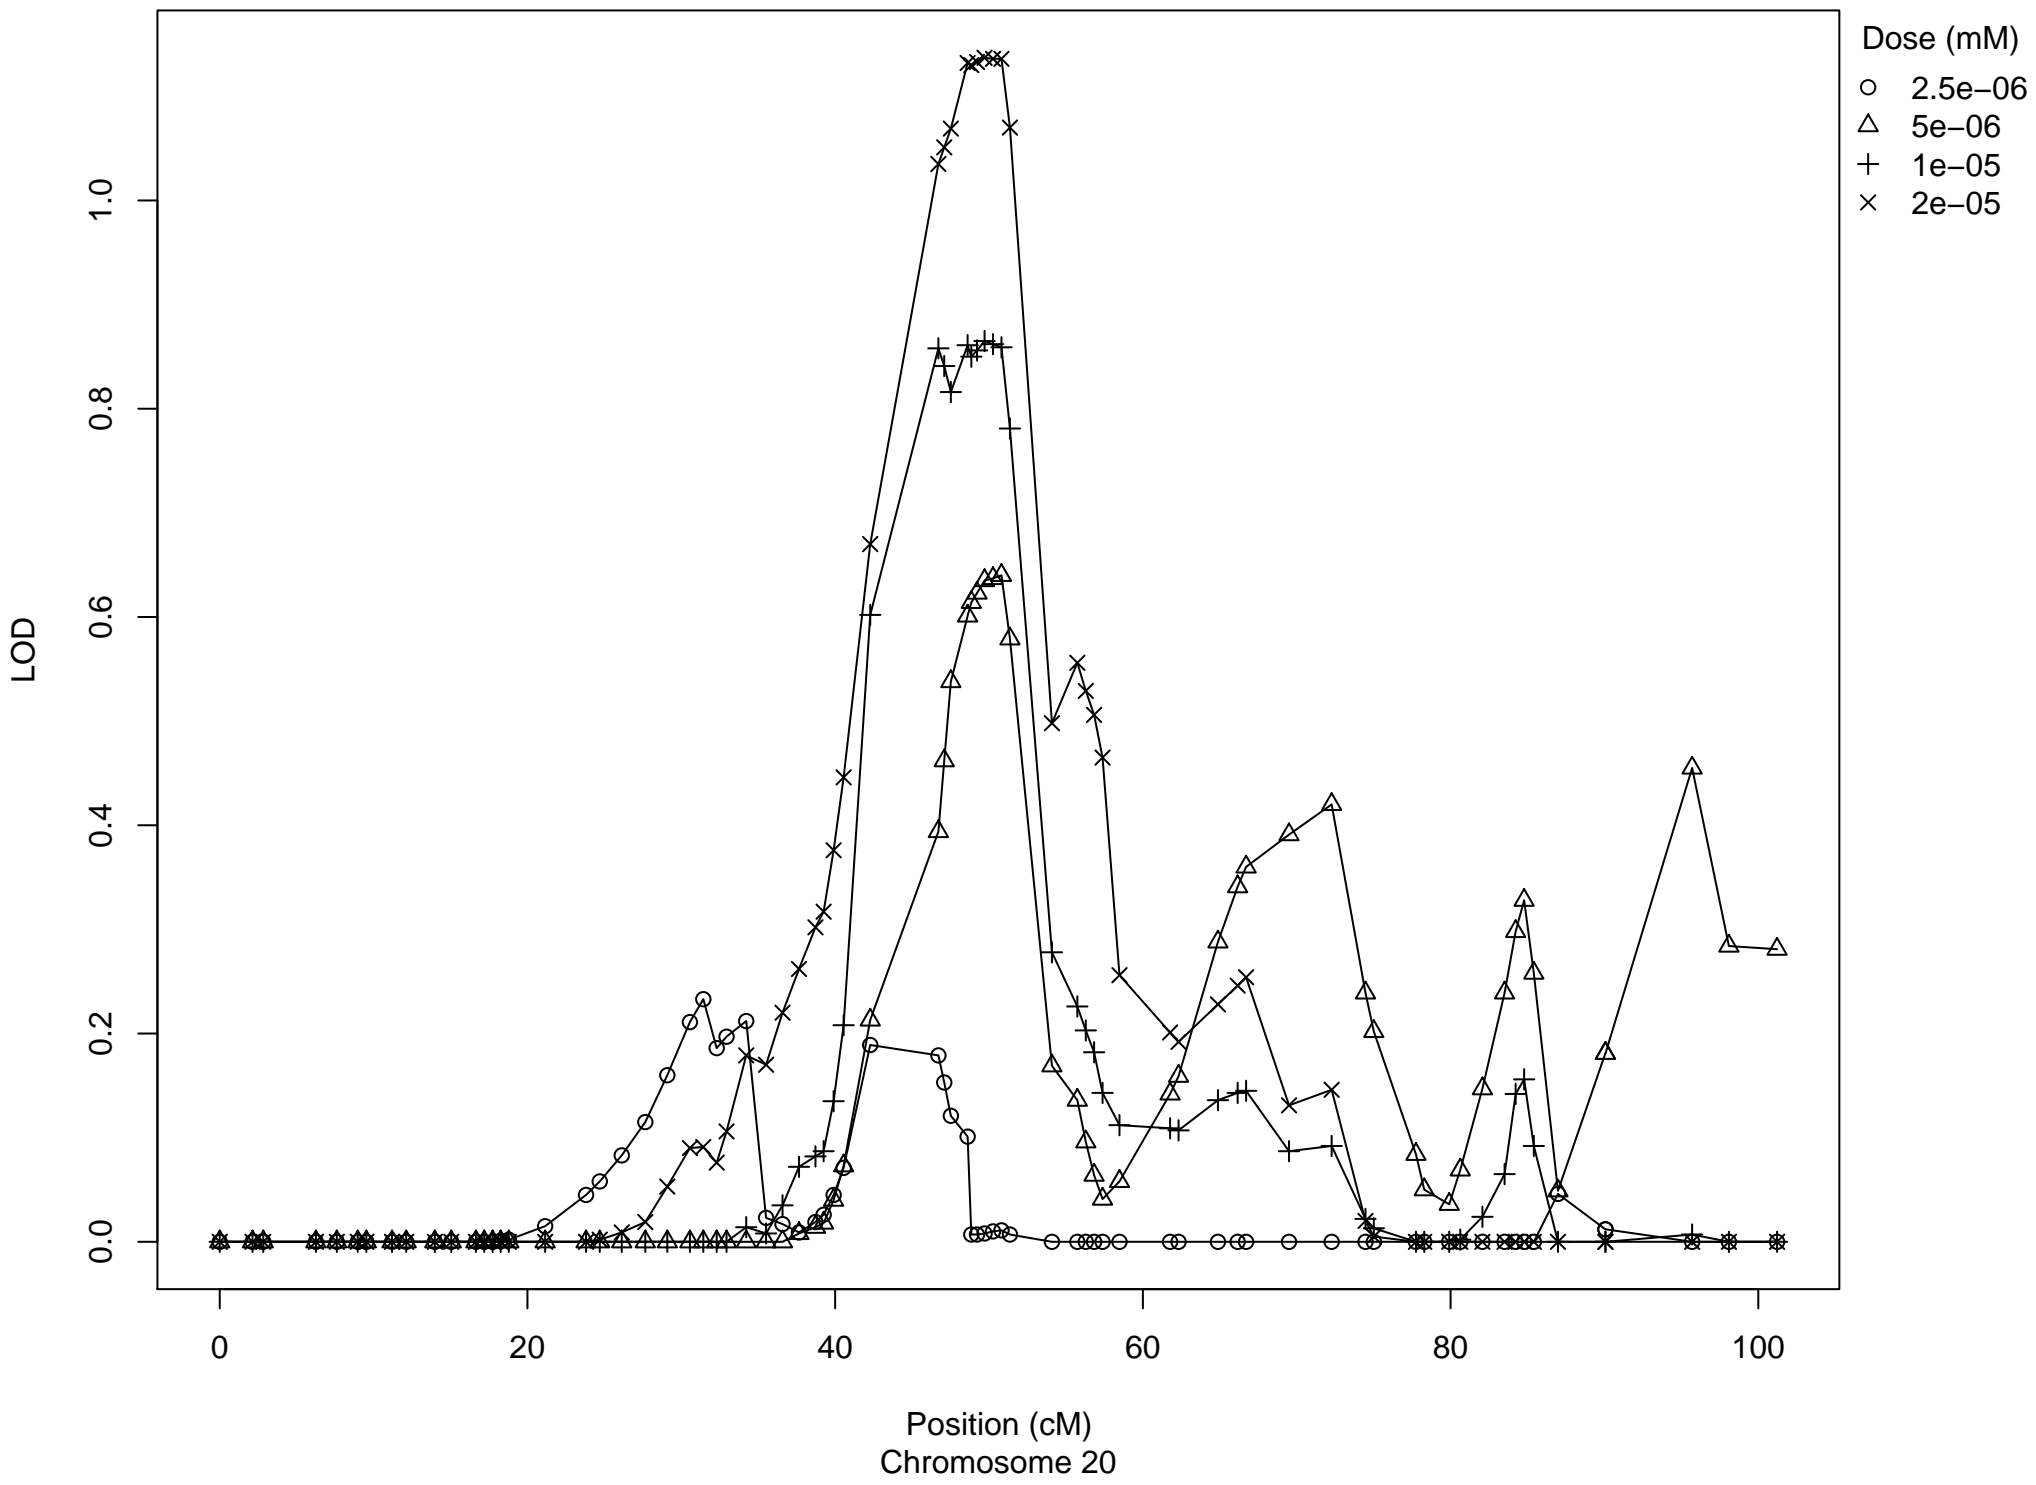

# Gemcitabine (Gem)

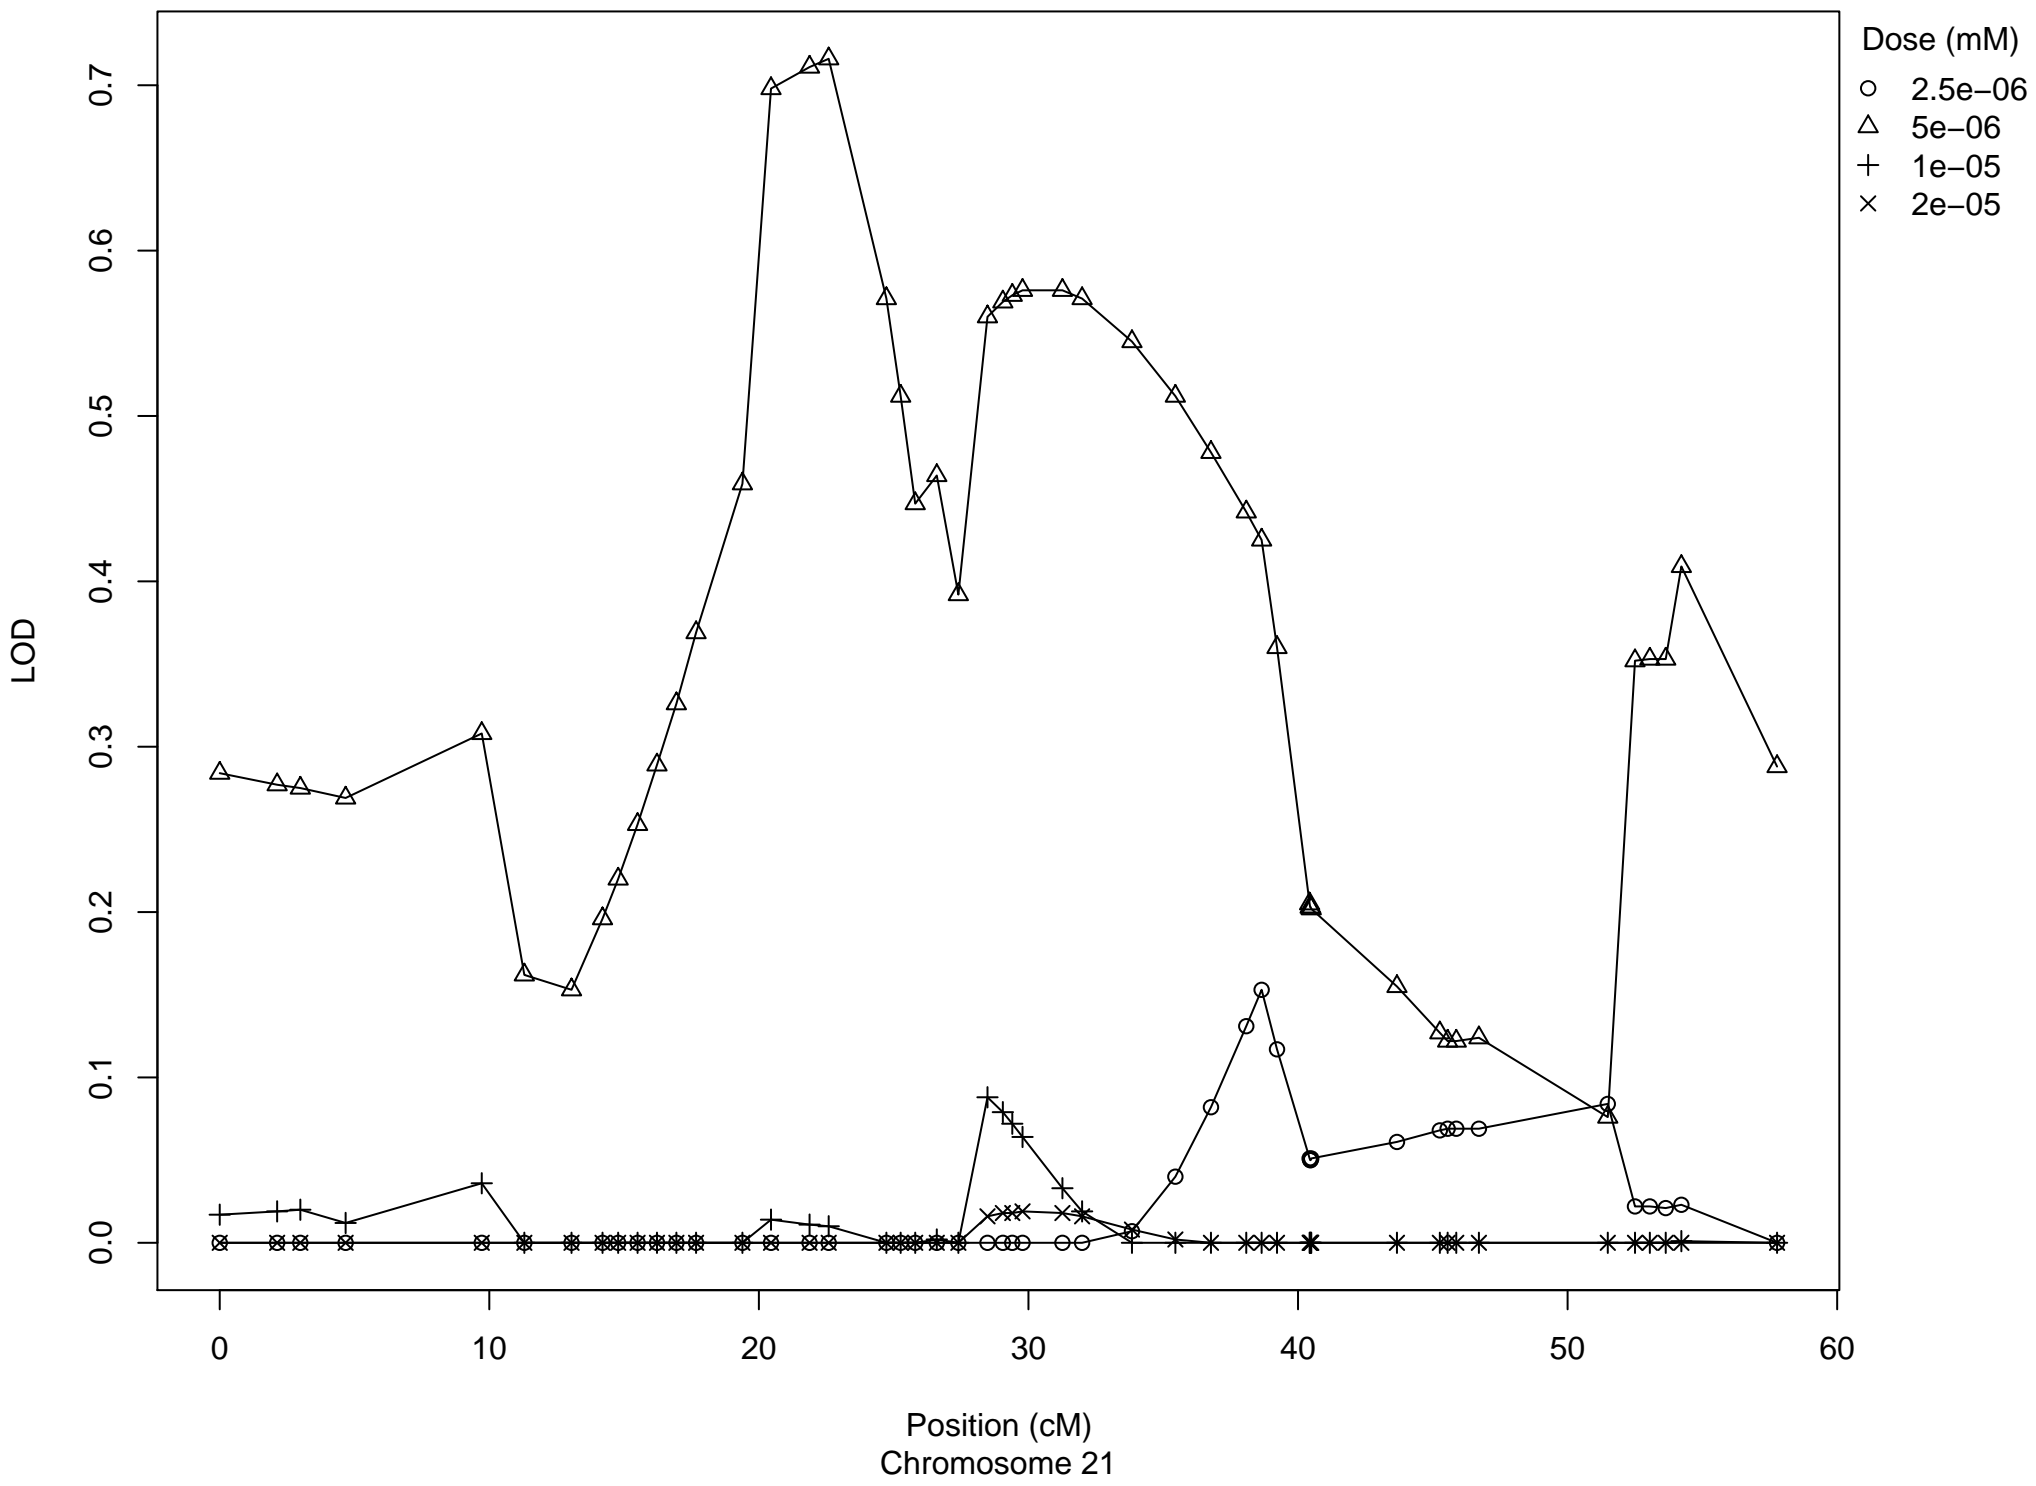

# Gemcitabine (Gem)

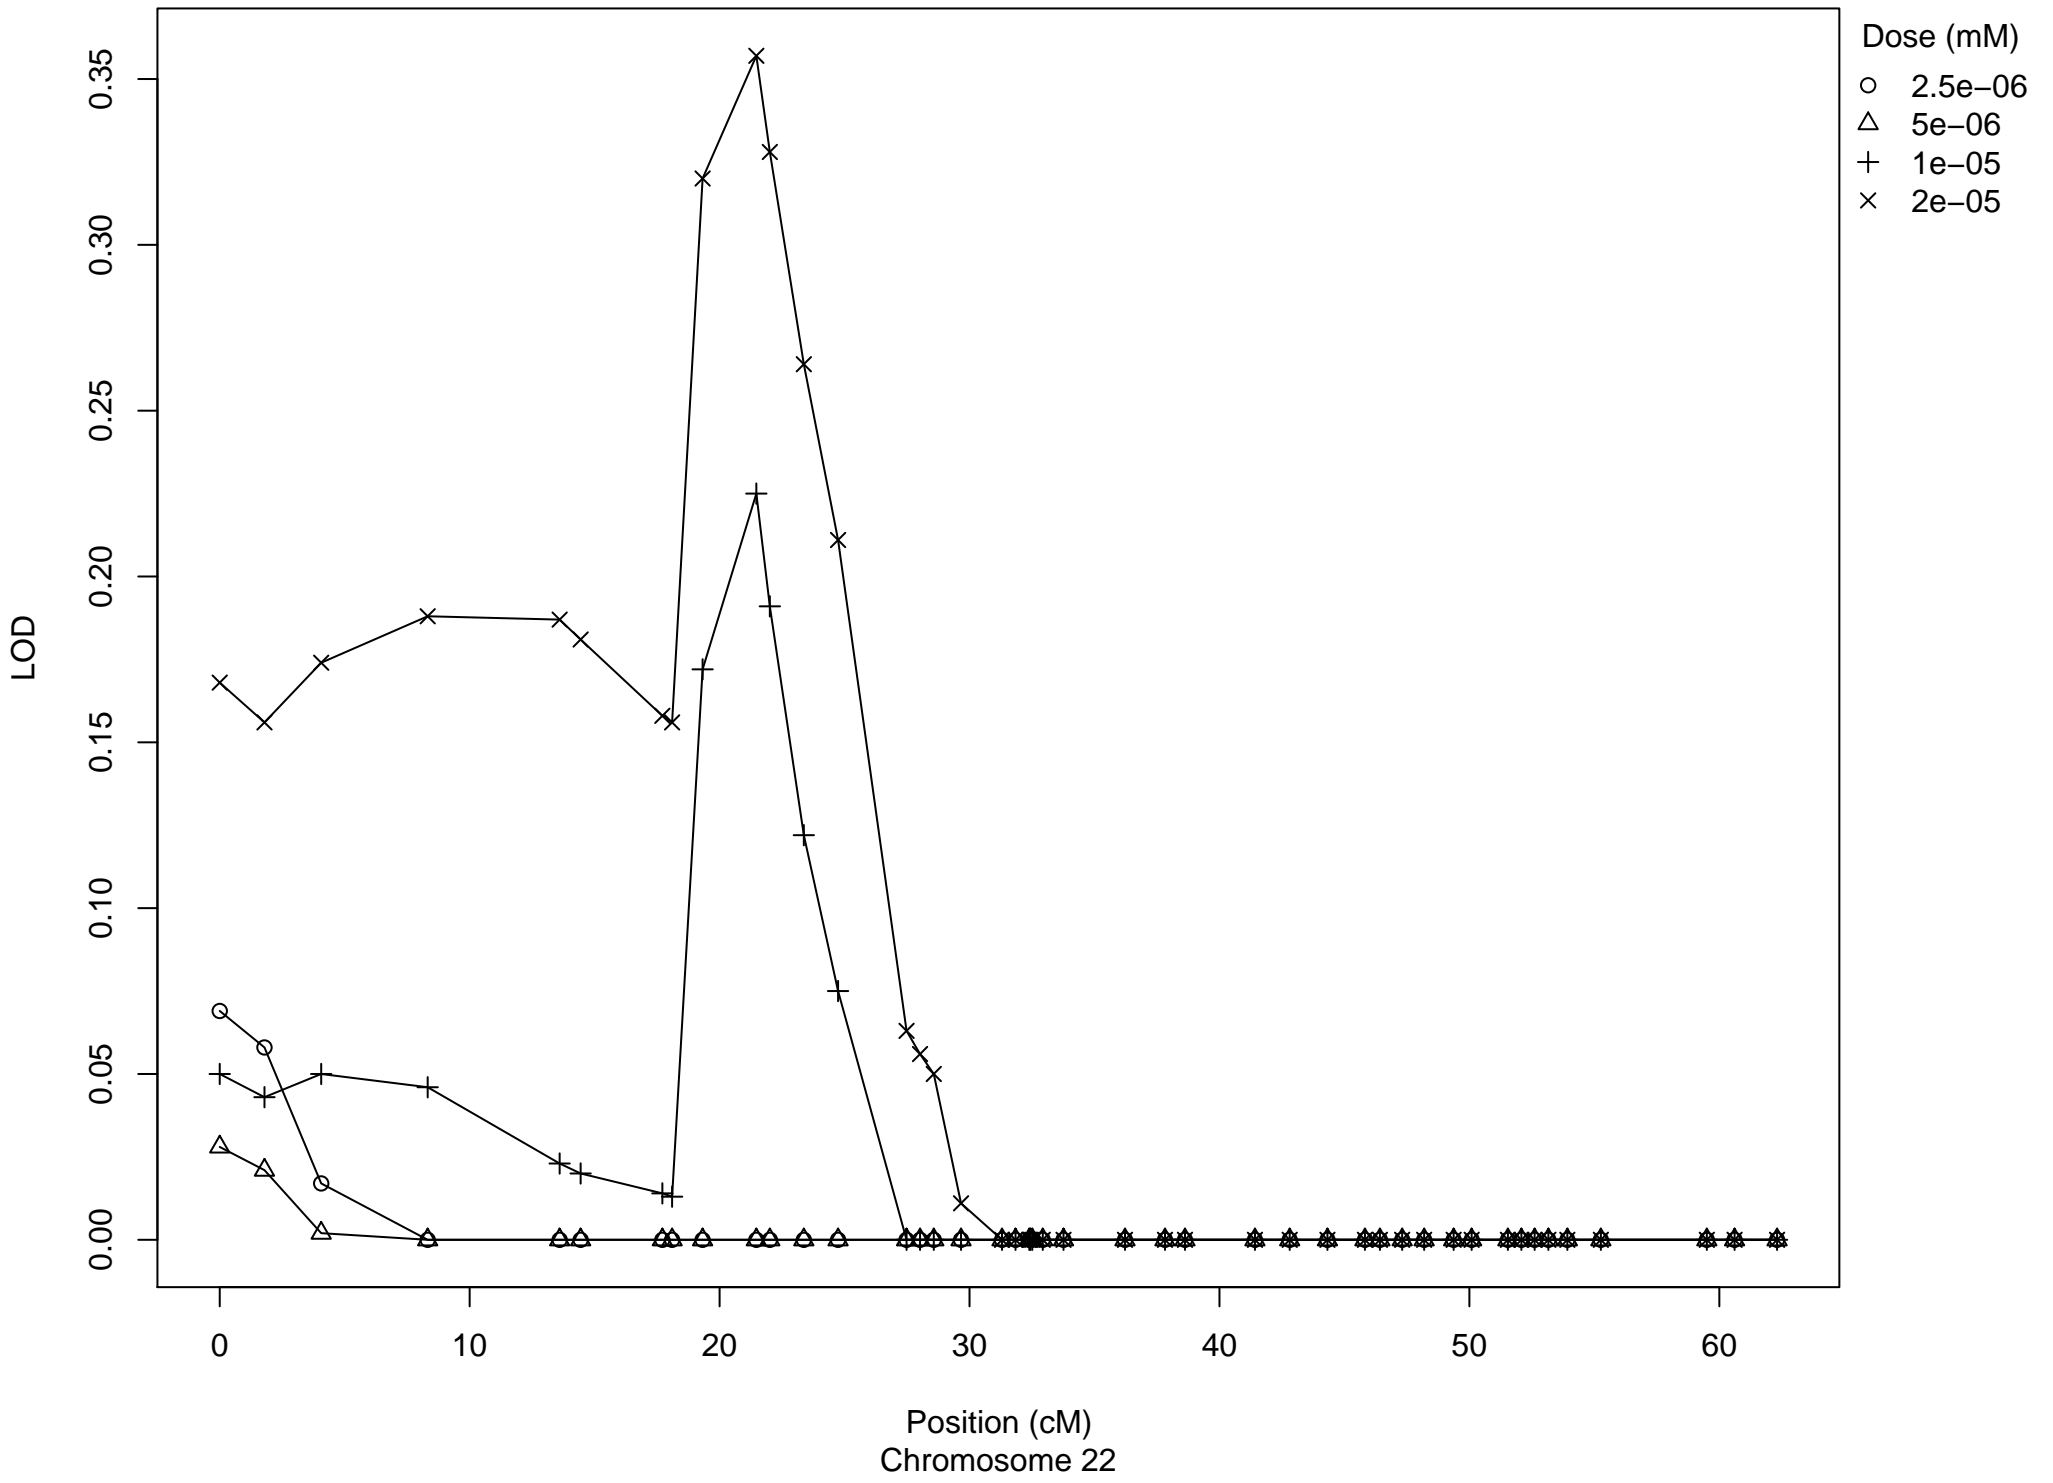



# Hydroxyurea (Hydrox)

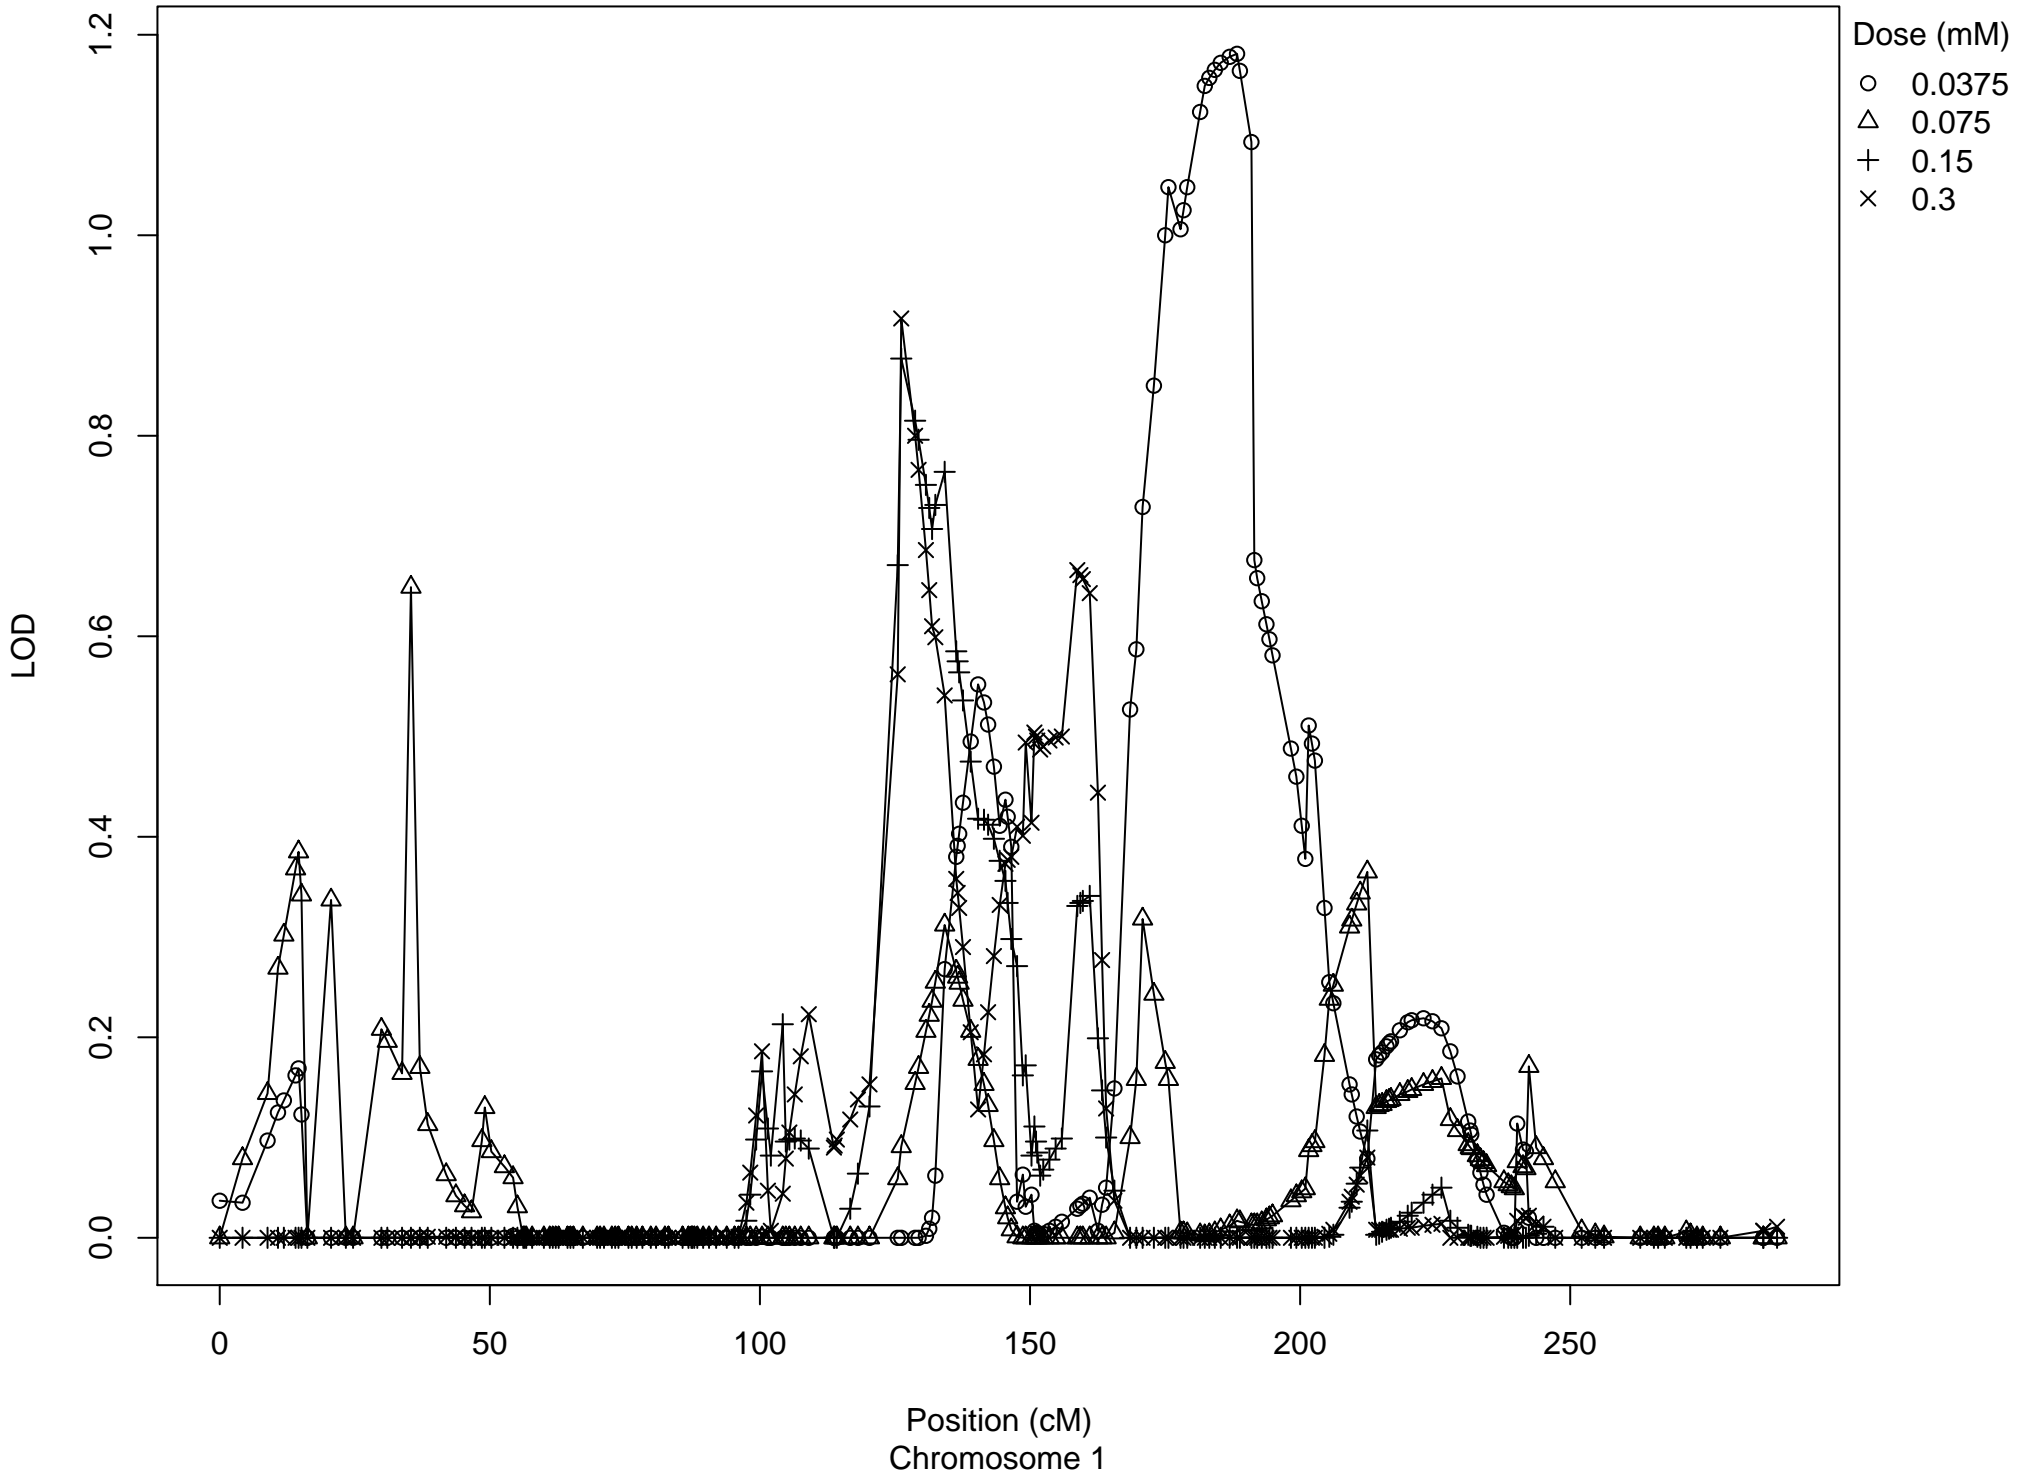

# Hydroxyurea (Hydrox)

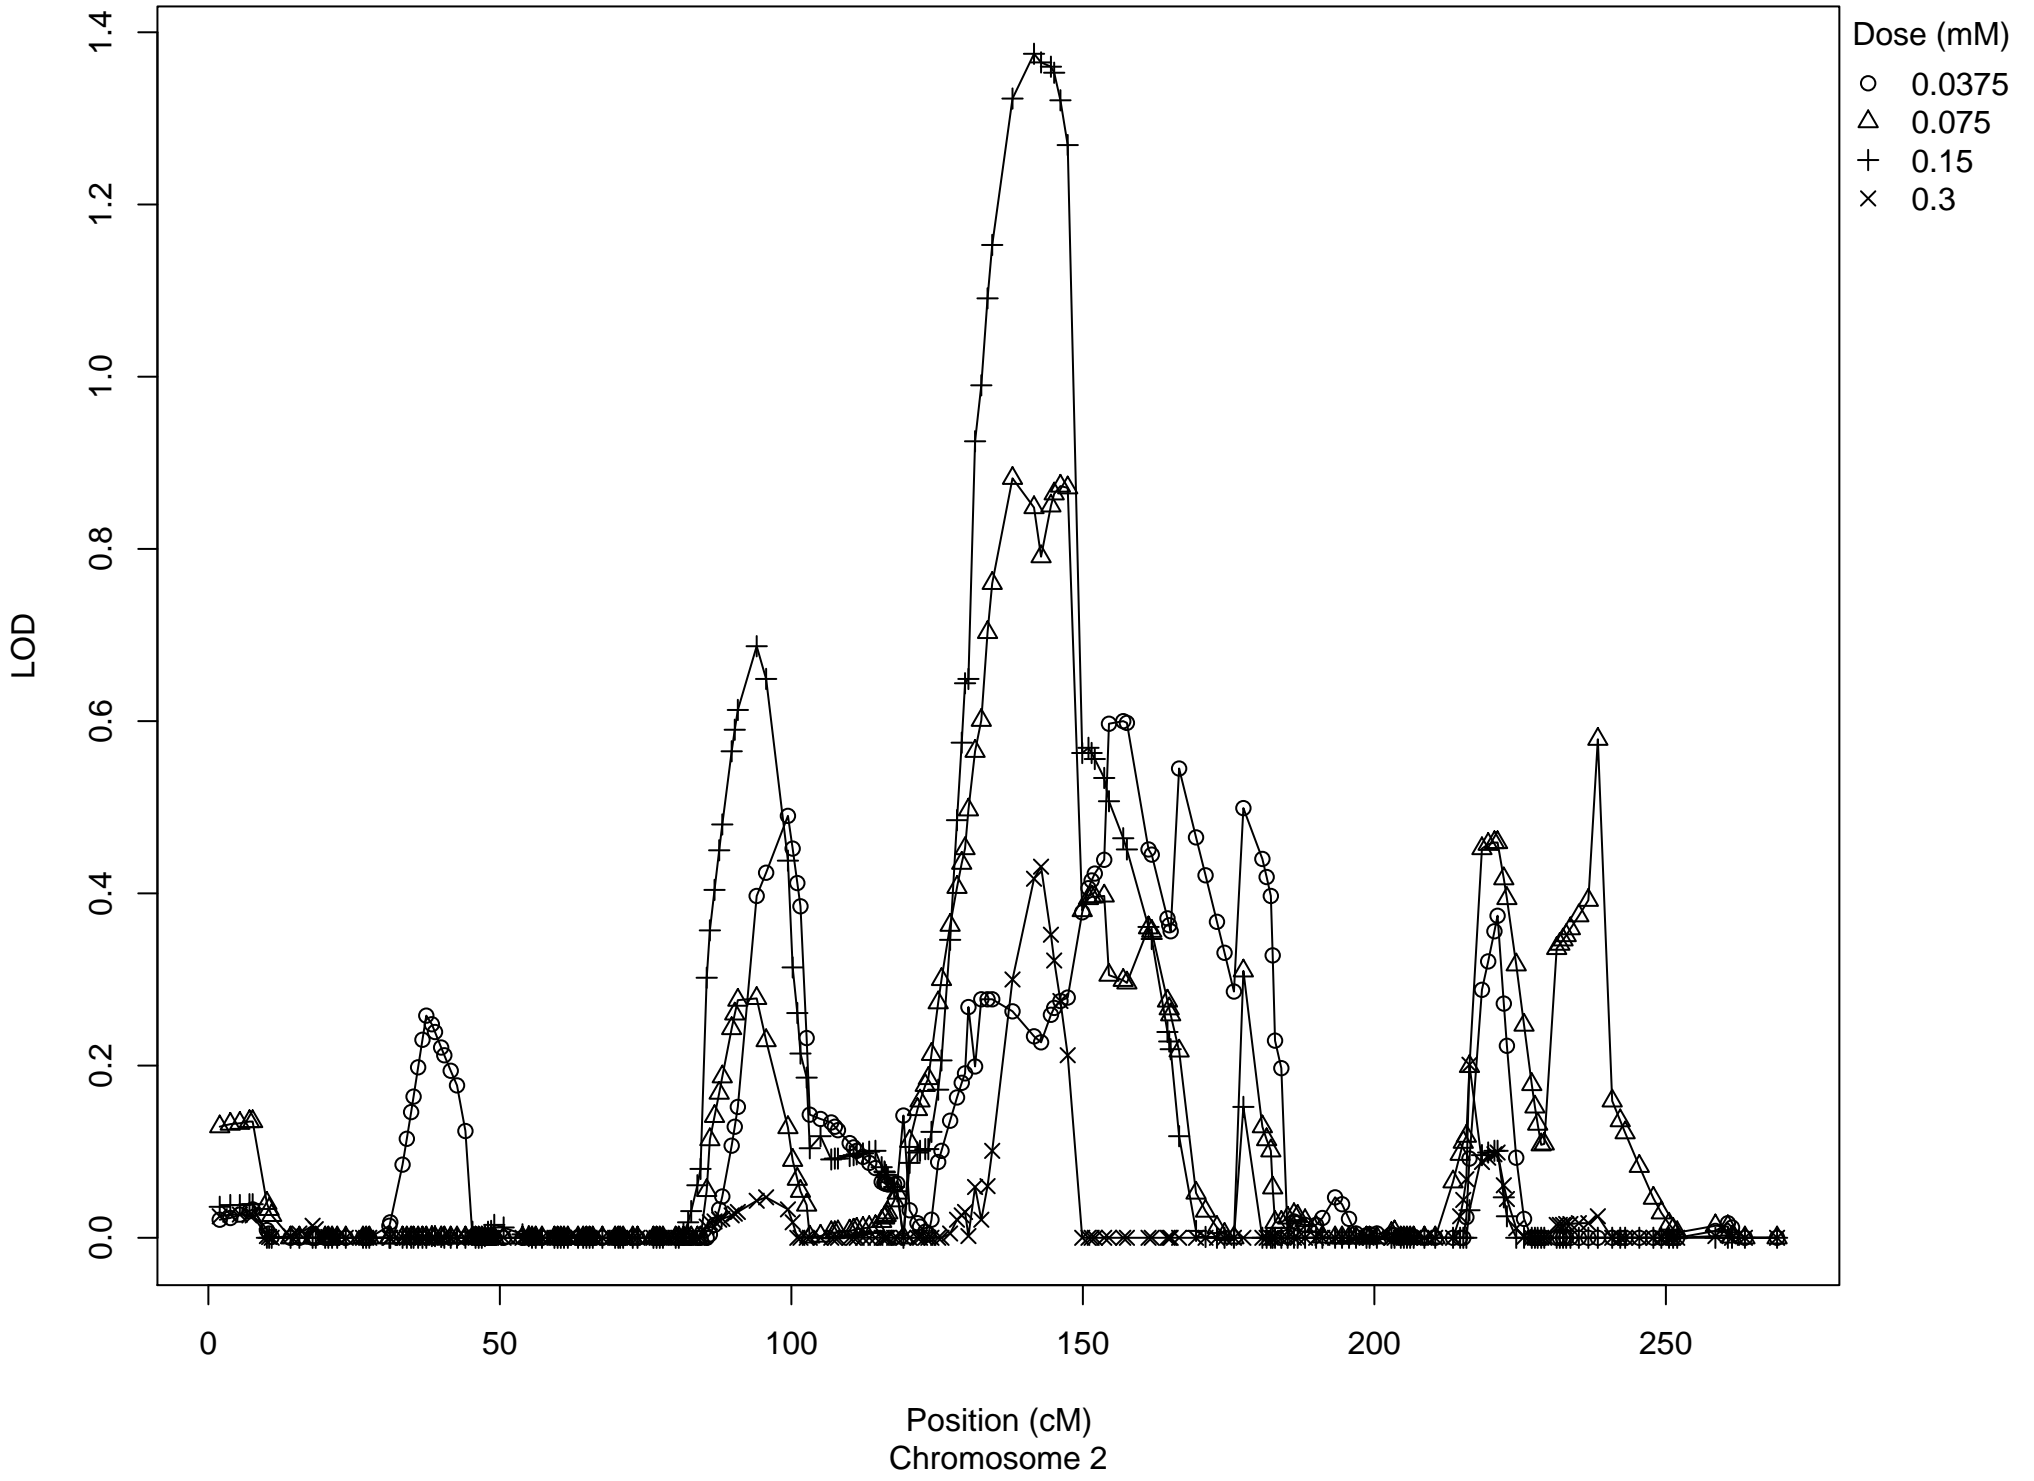

# Hydroxyurea (Hydrox)

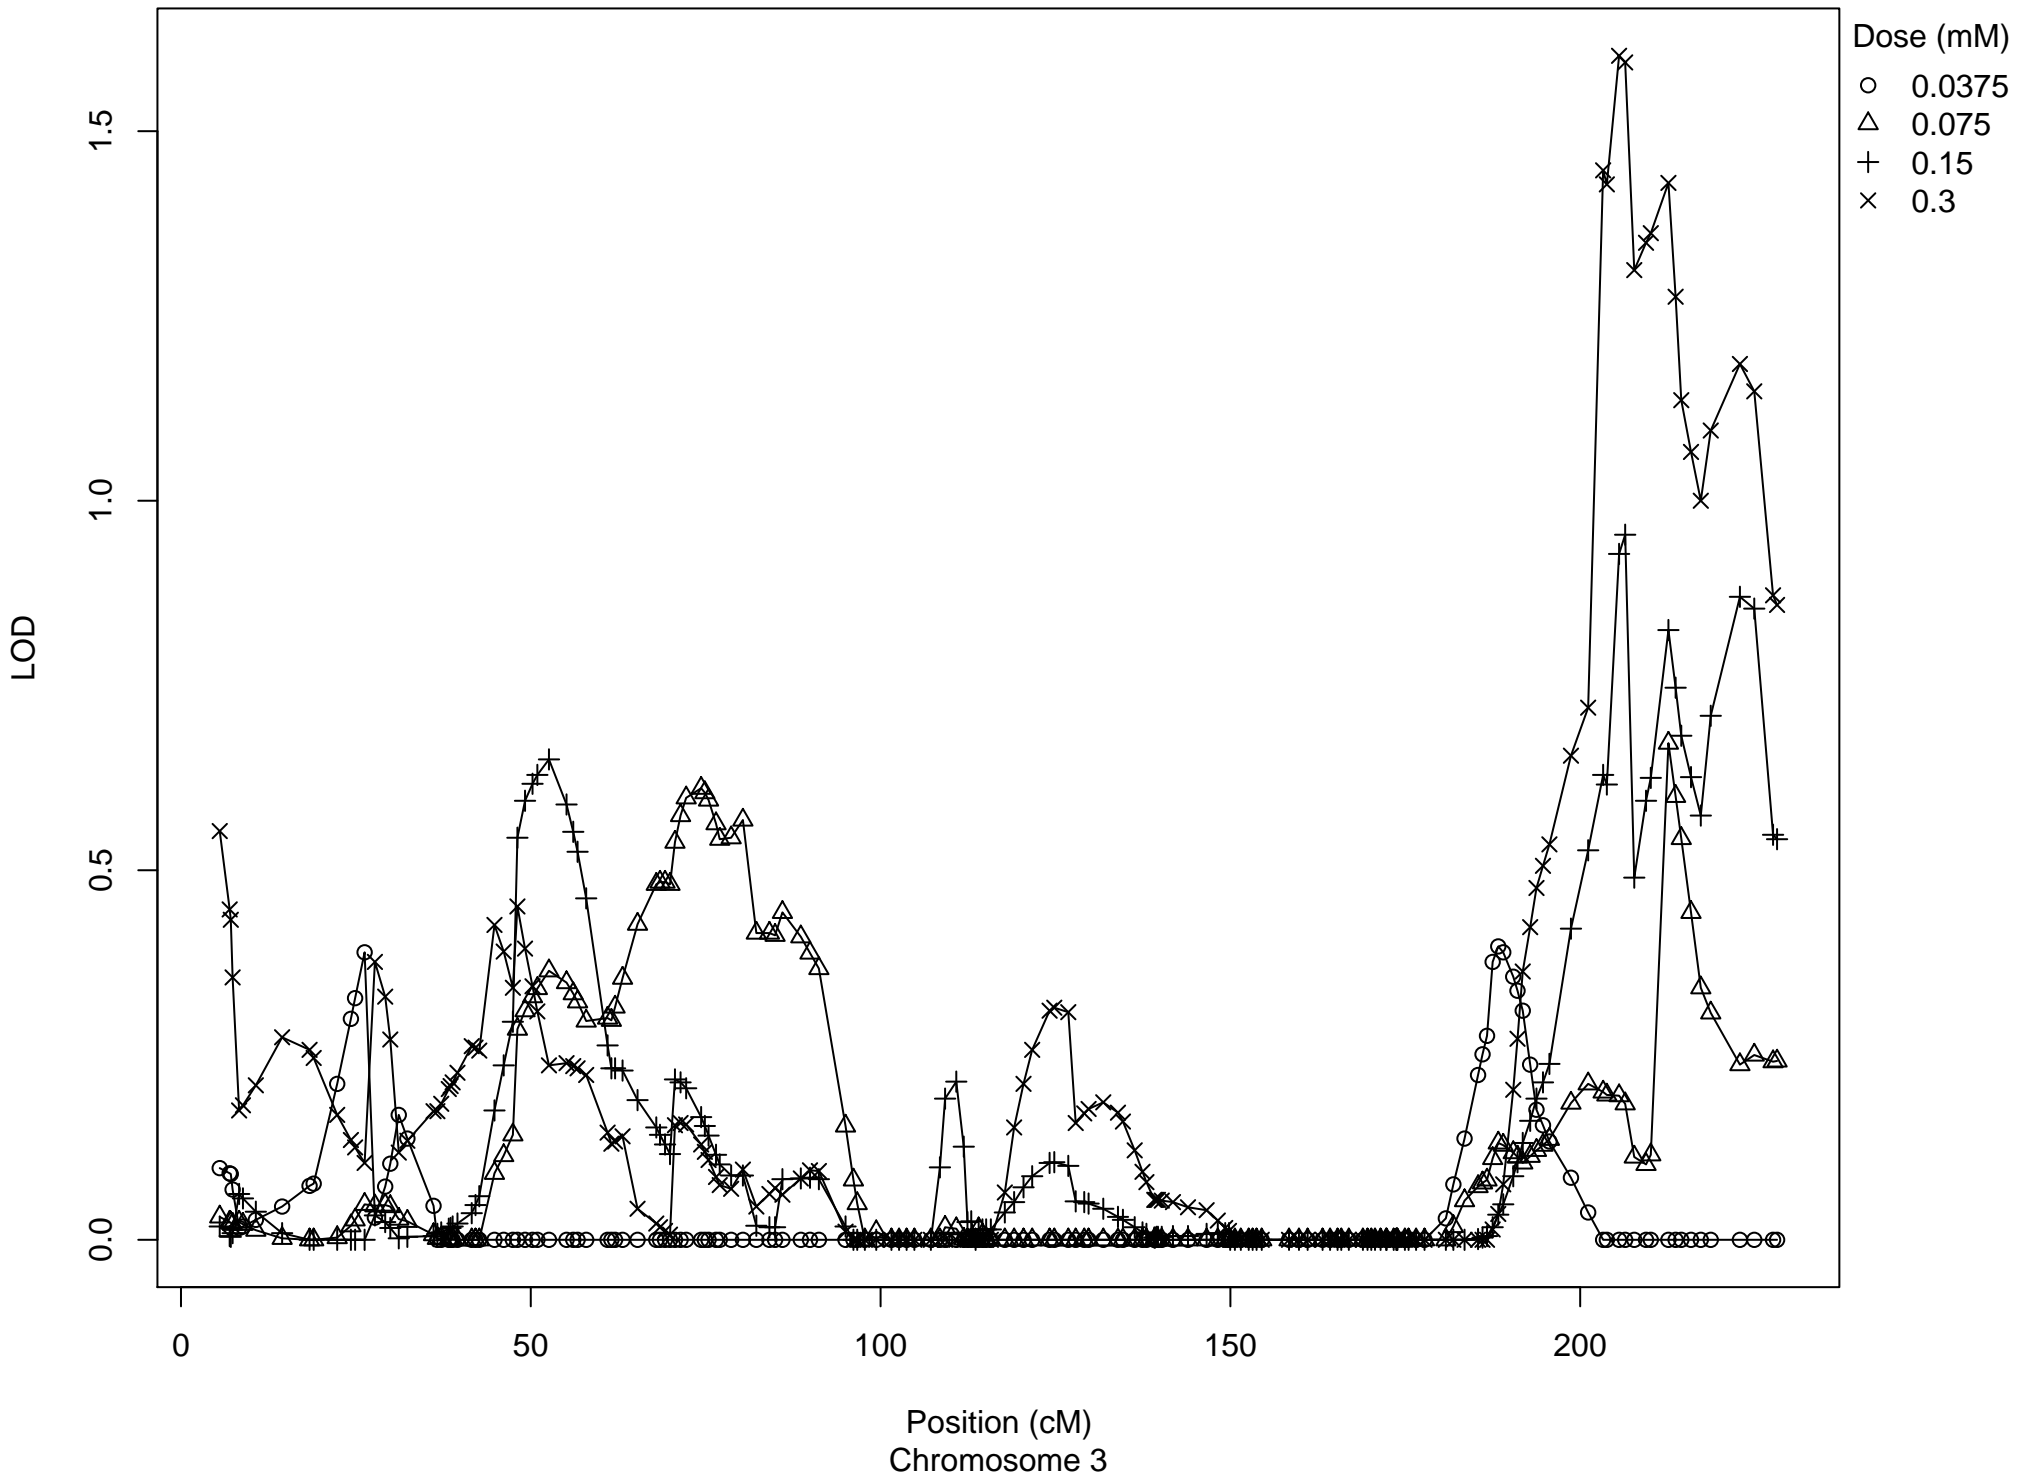

# Hydroxyurea (Hydrox)

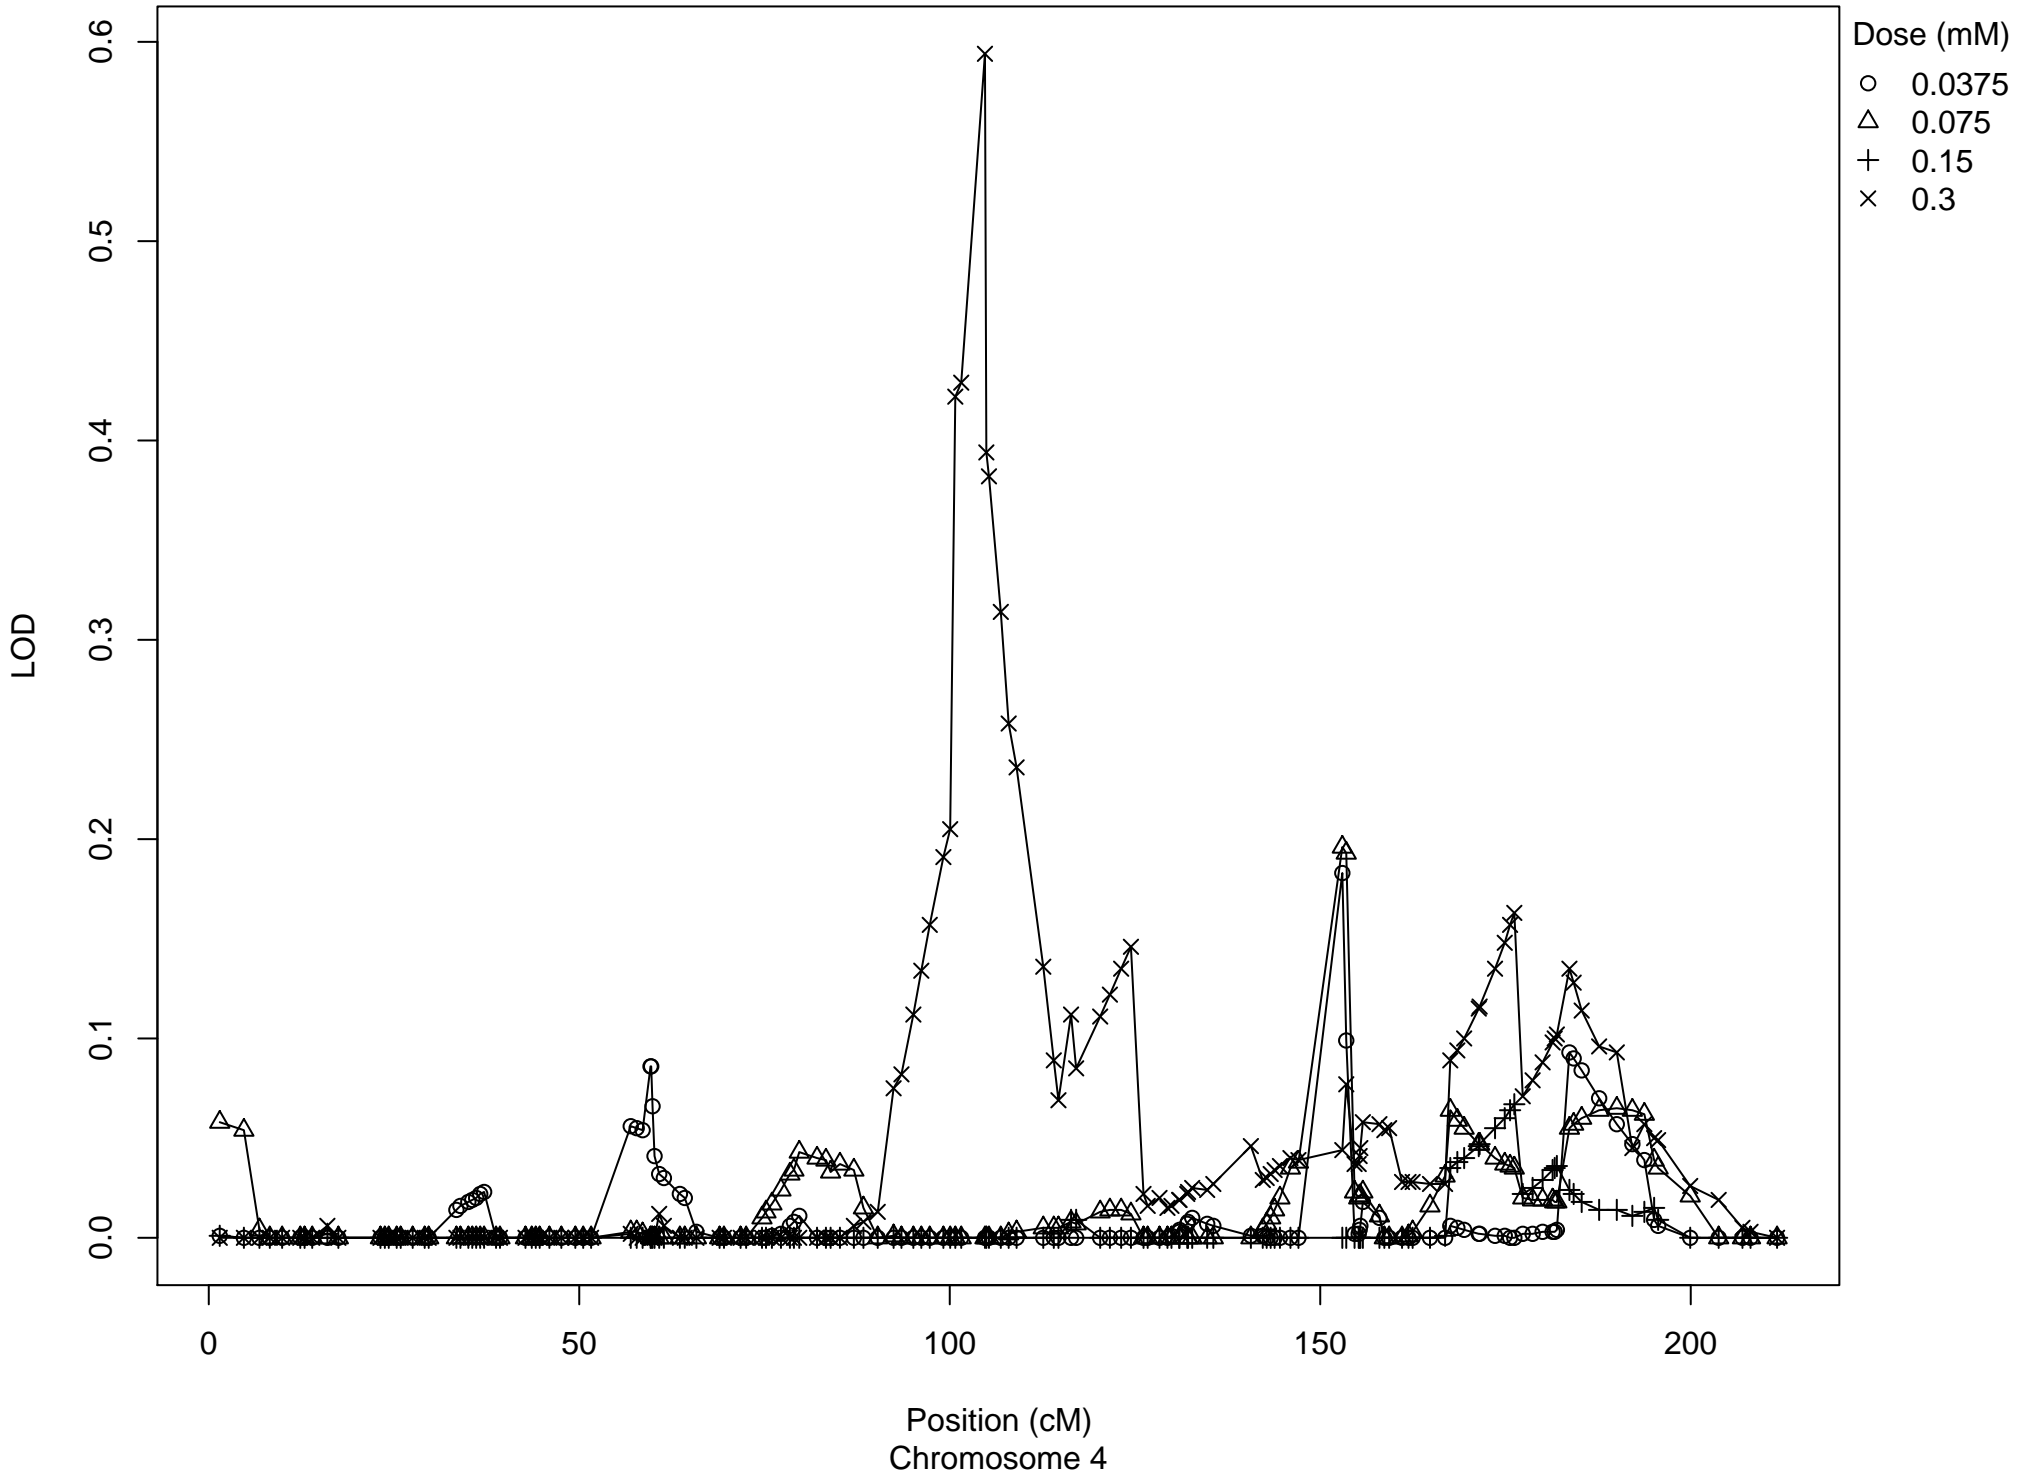

# Hydroxyurea (Hydrox)

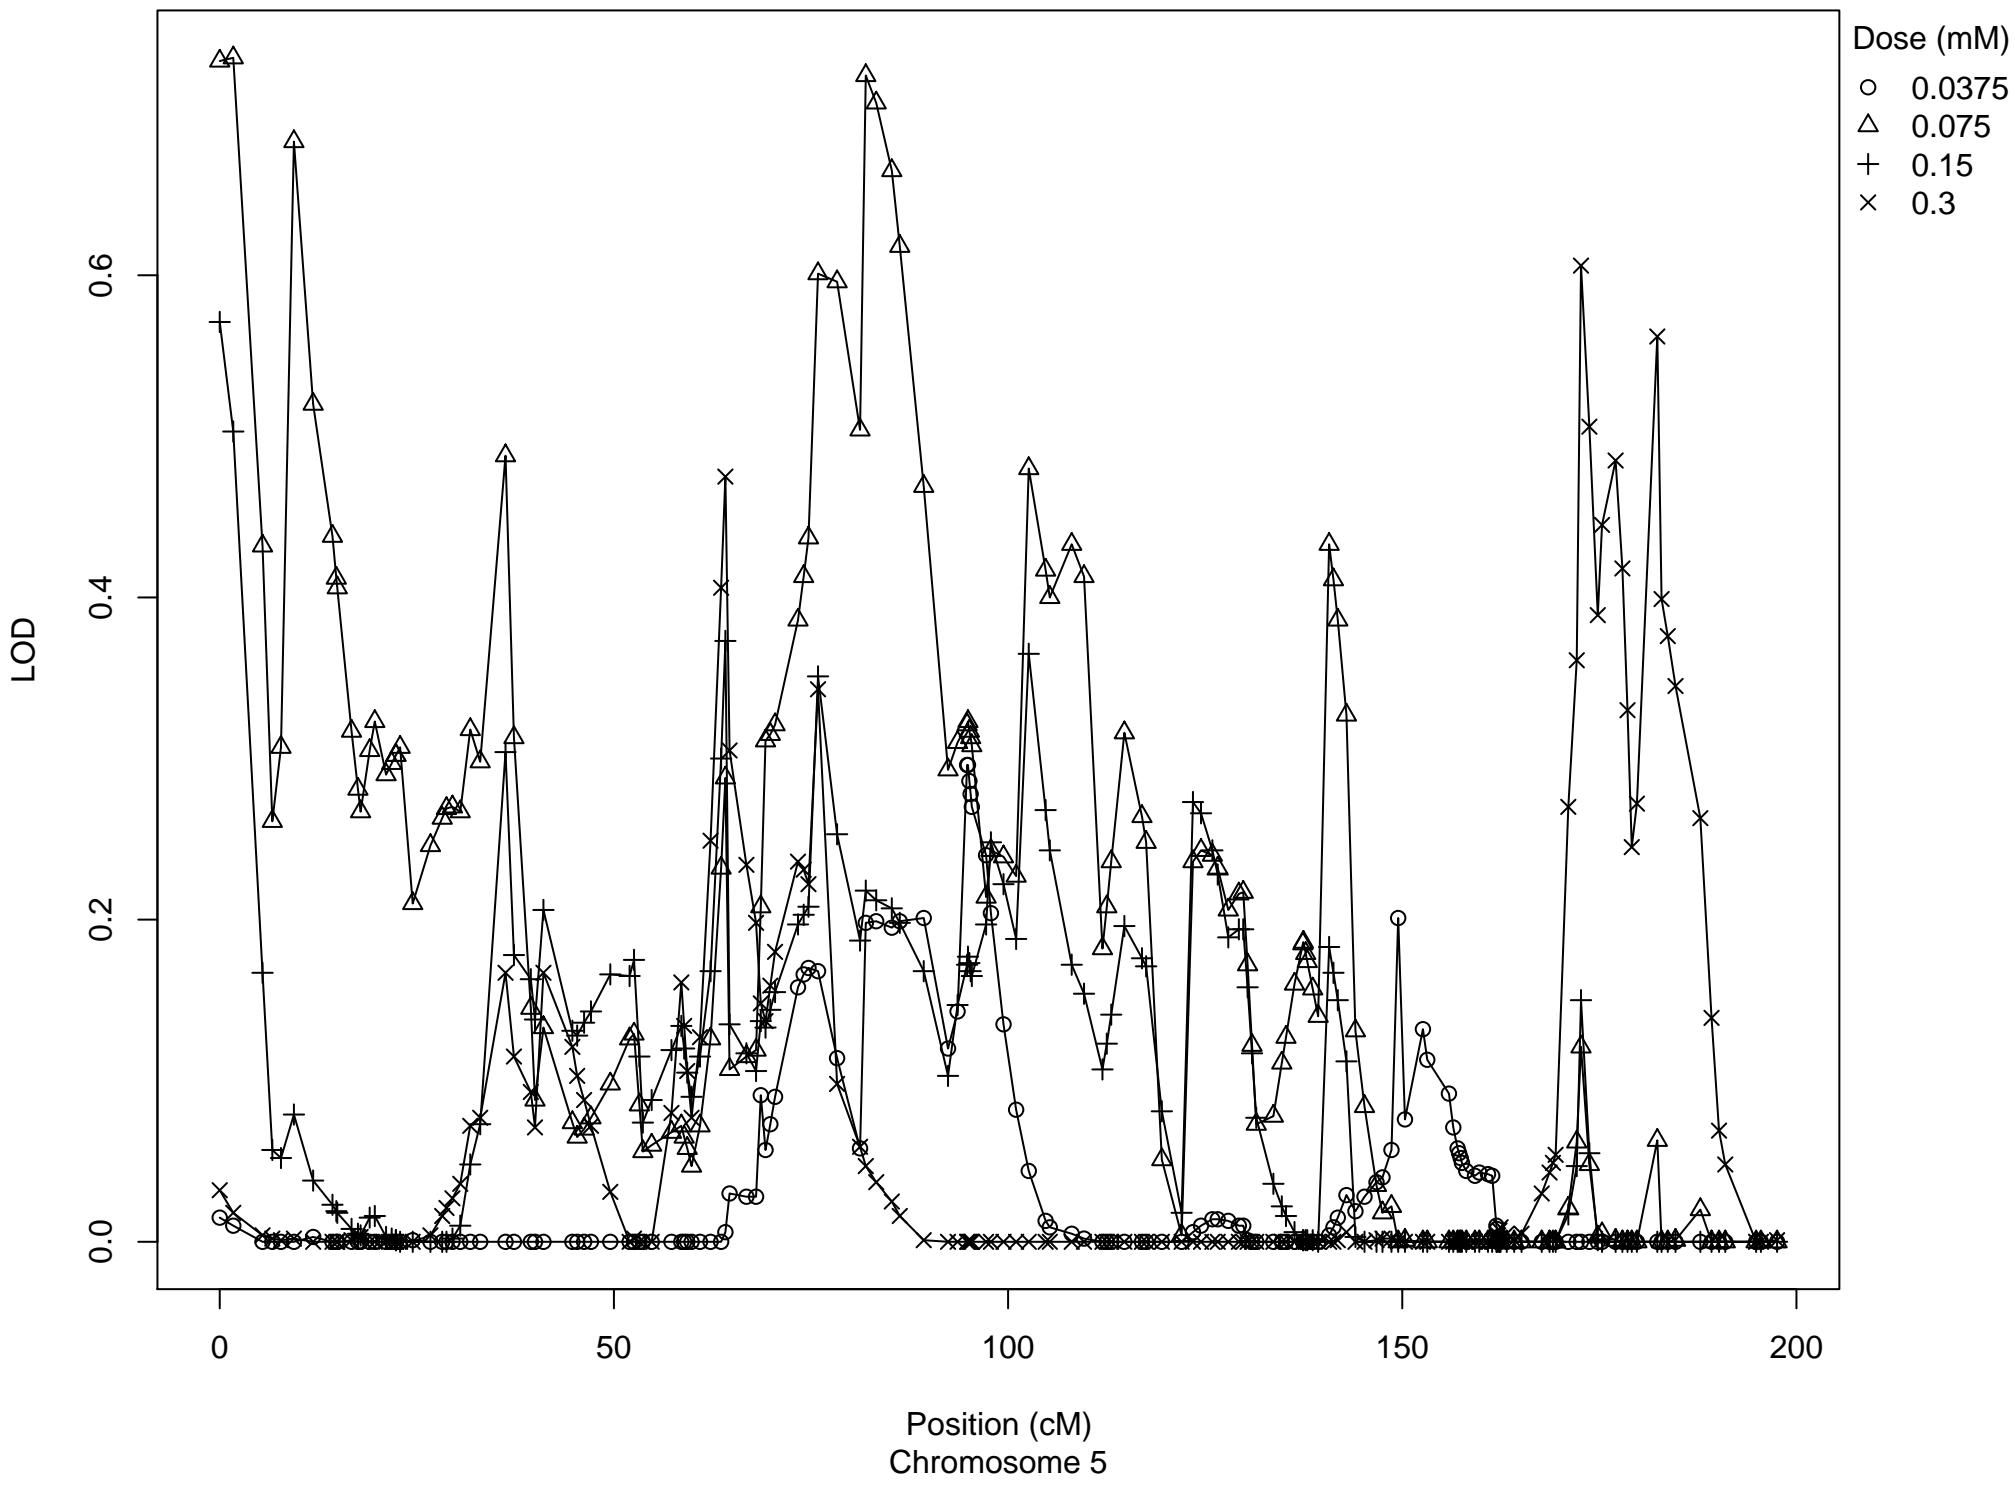

# Hydroxyurea (Hydrox)

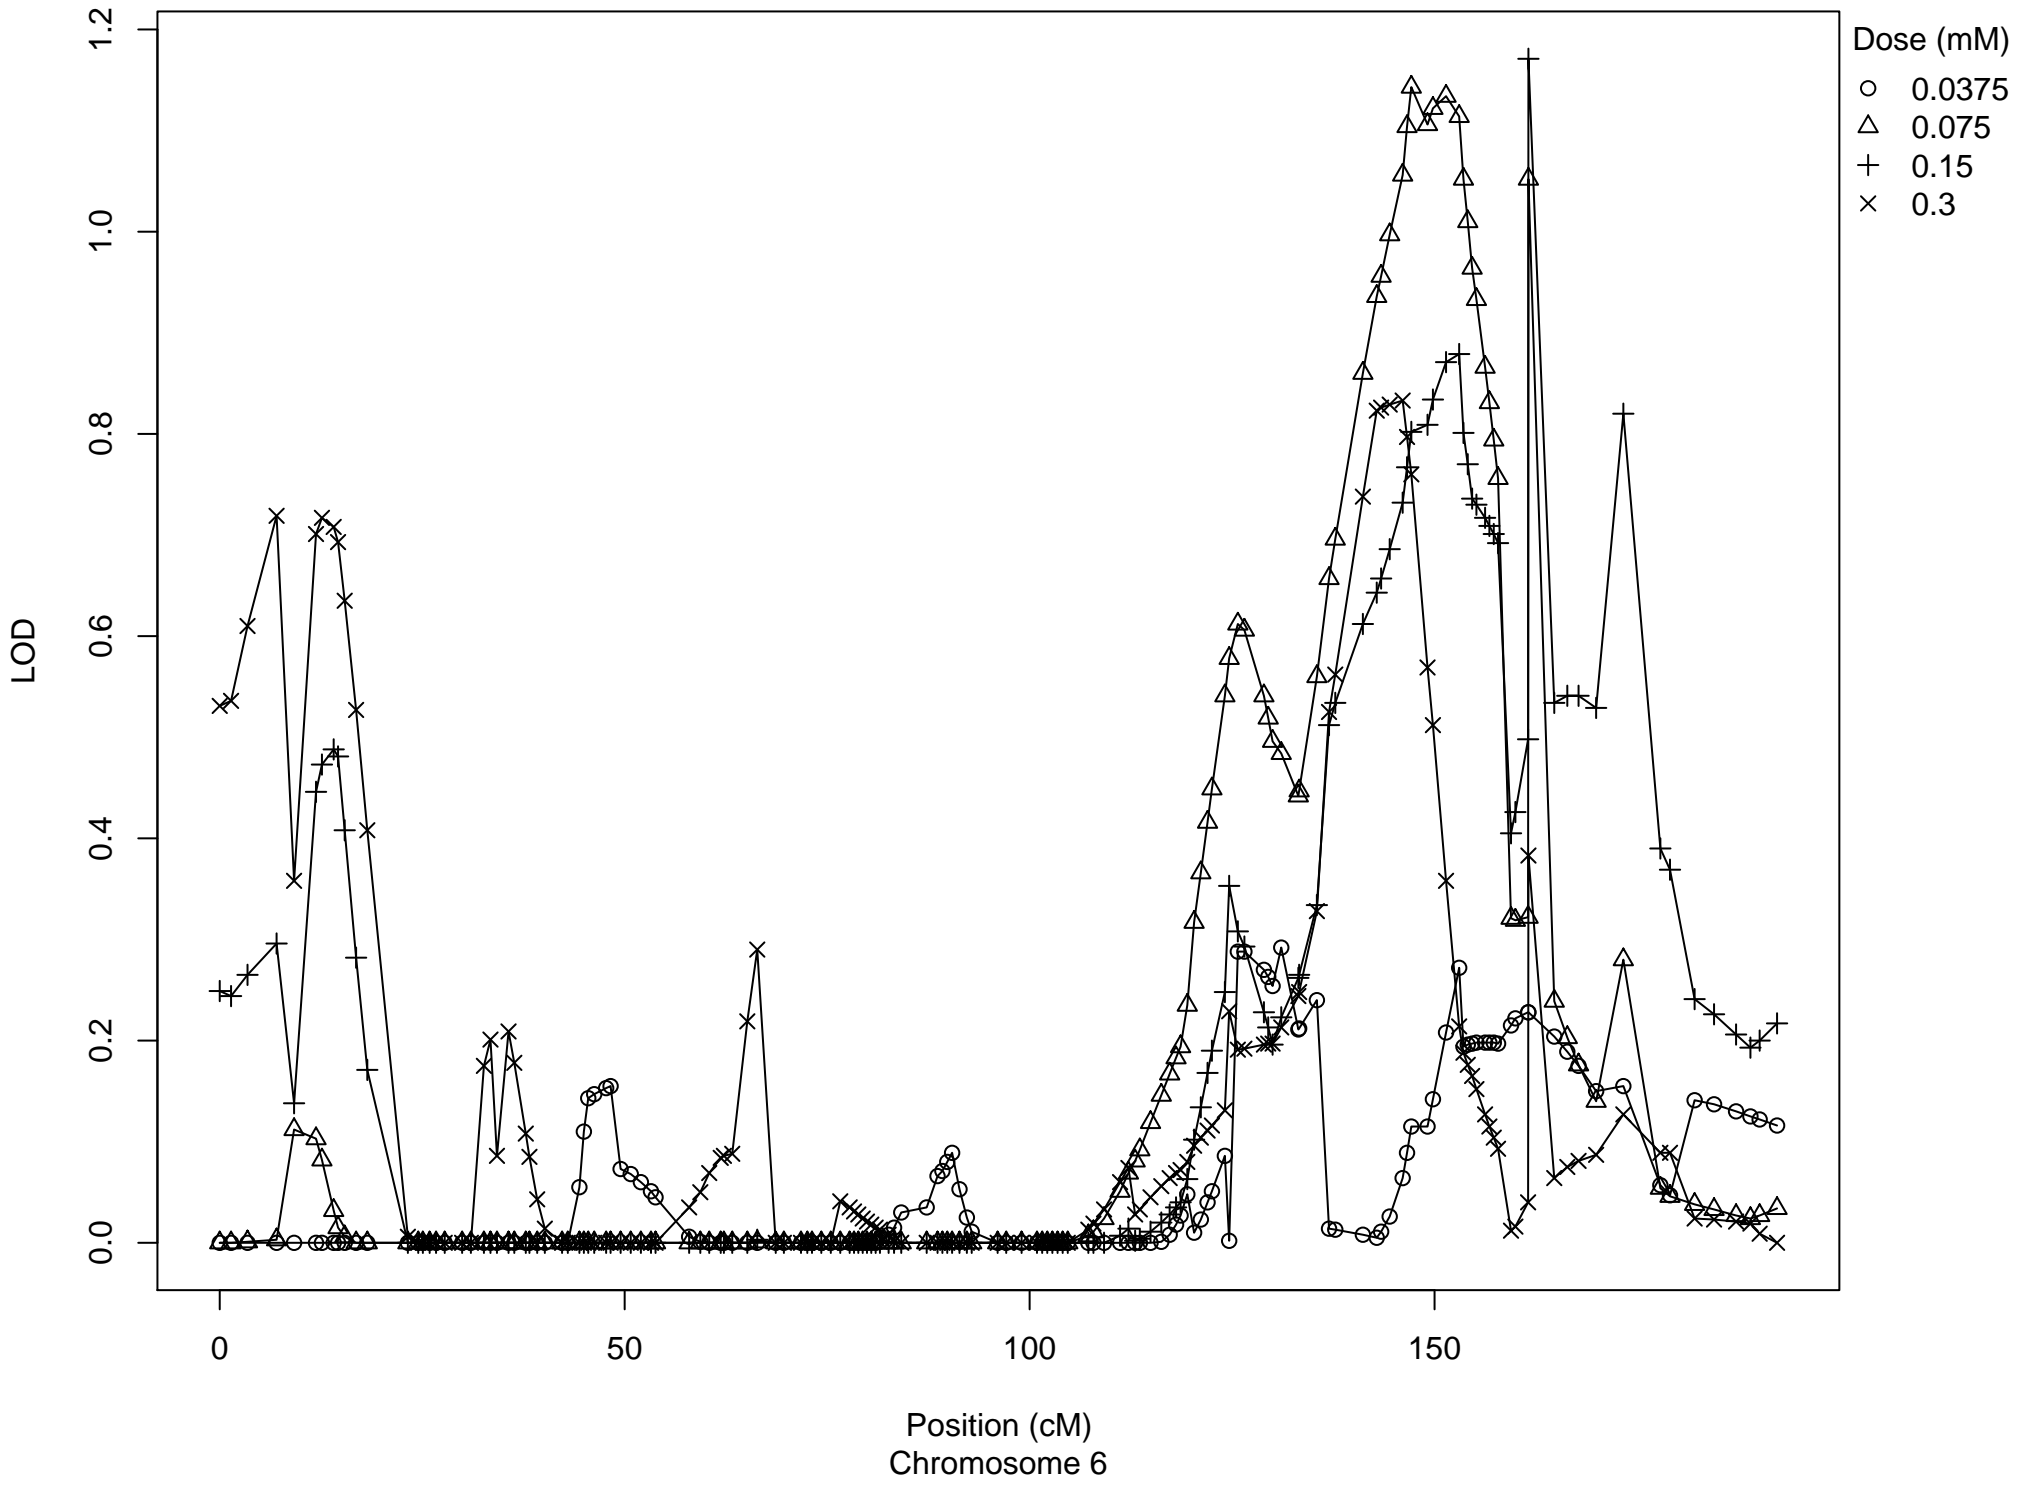

# Hydroxyurea (Hydrox)

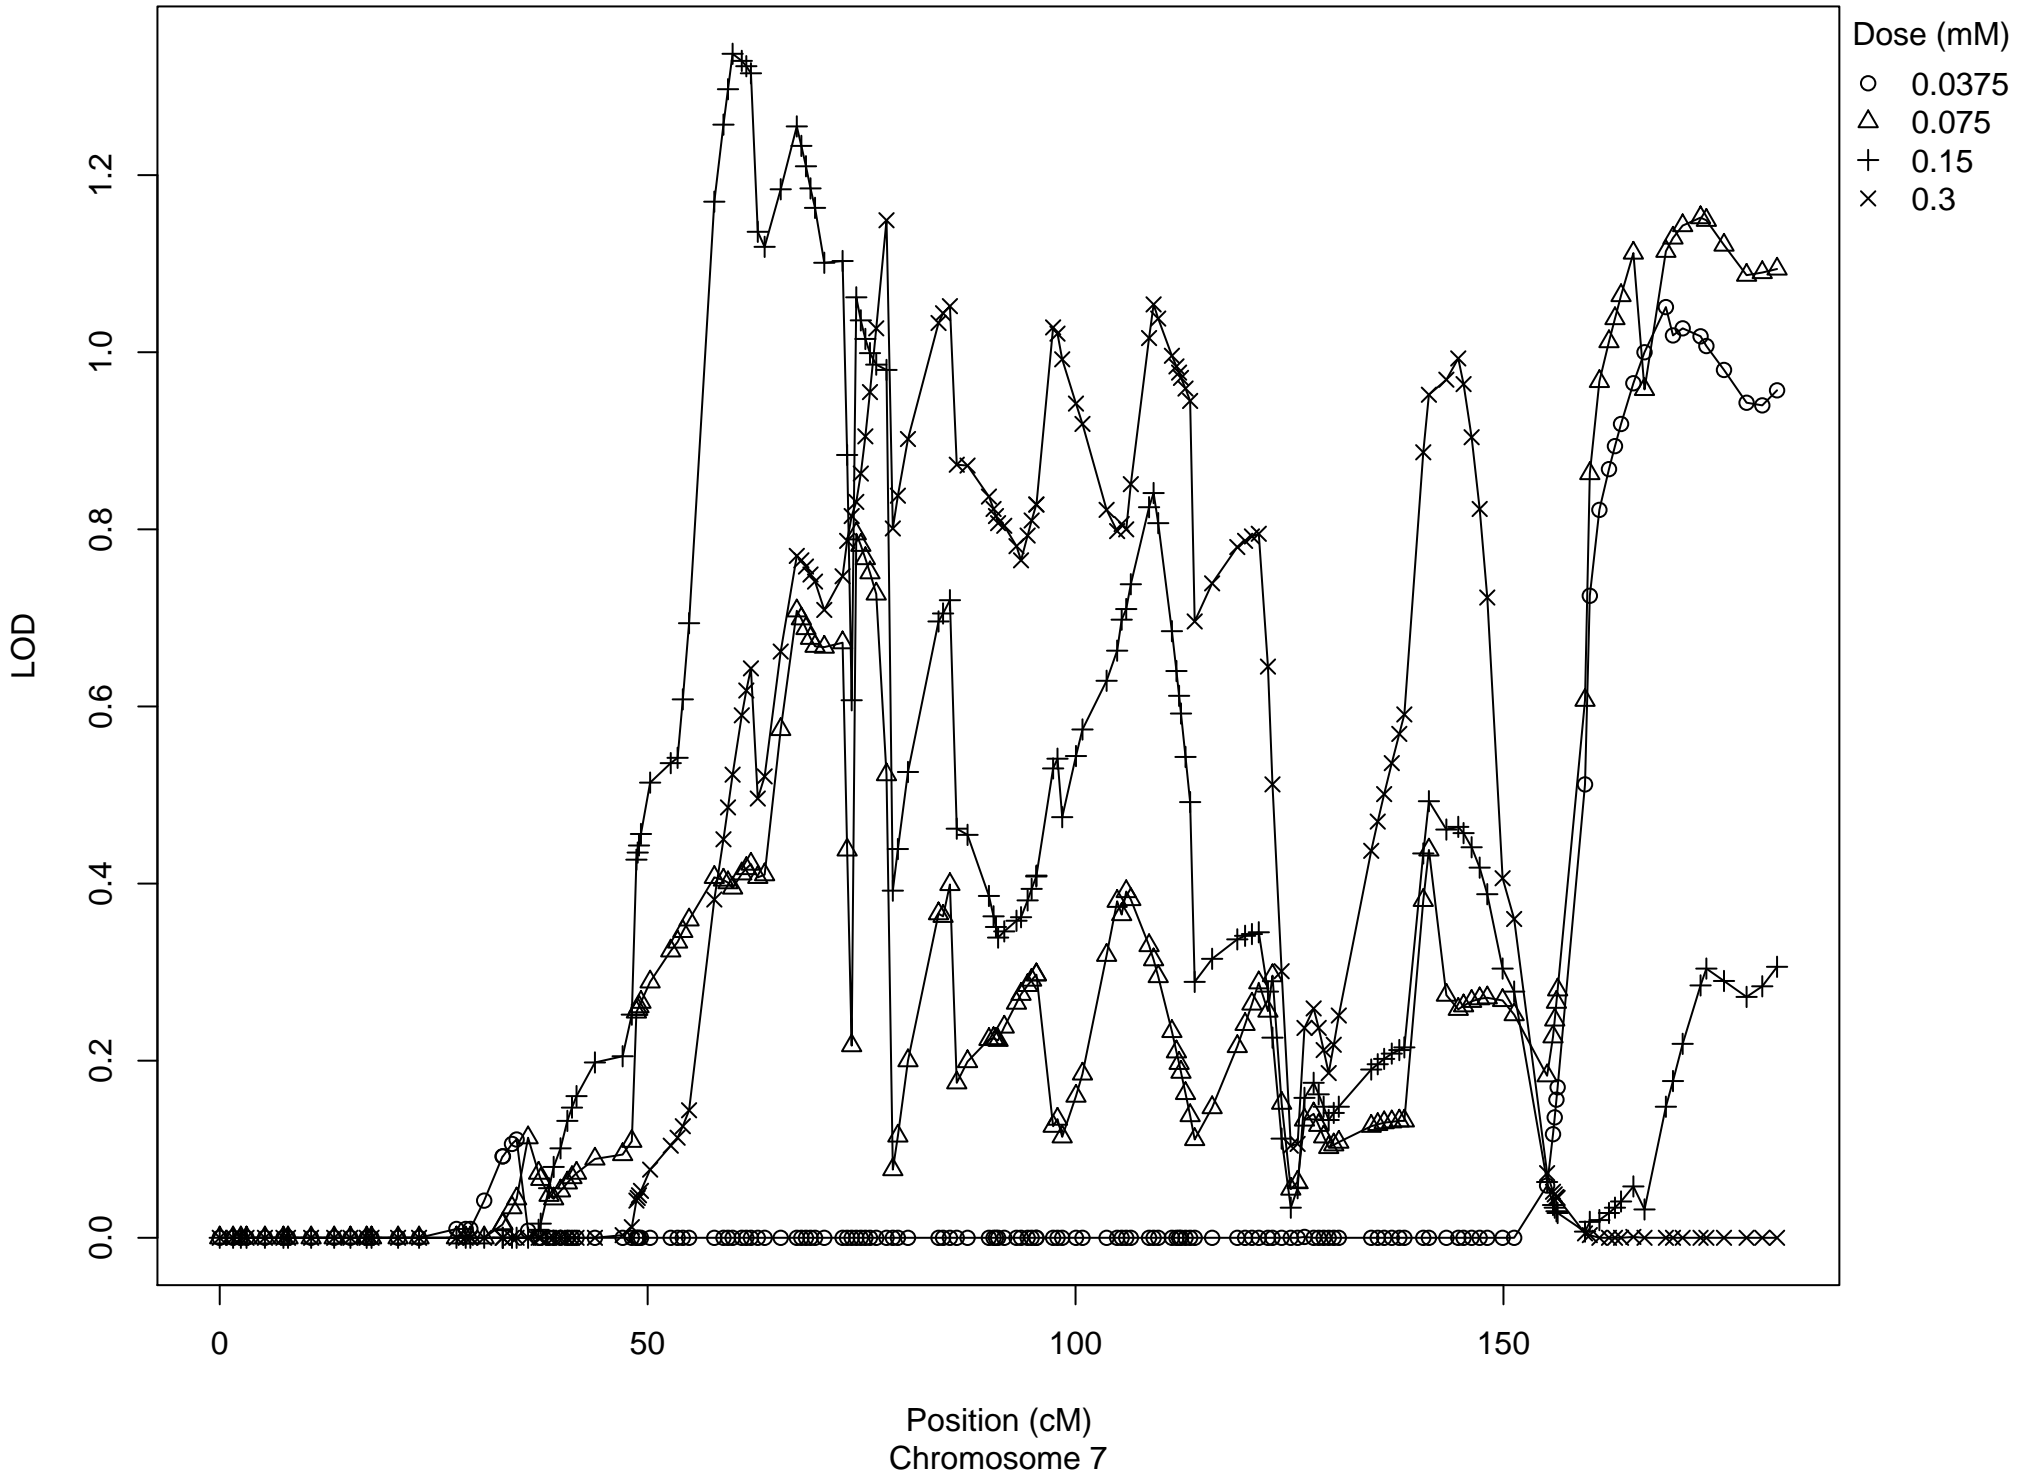

# Hydroxyurea (Hydrox)

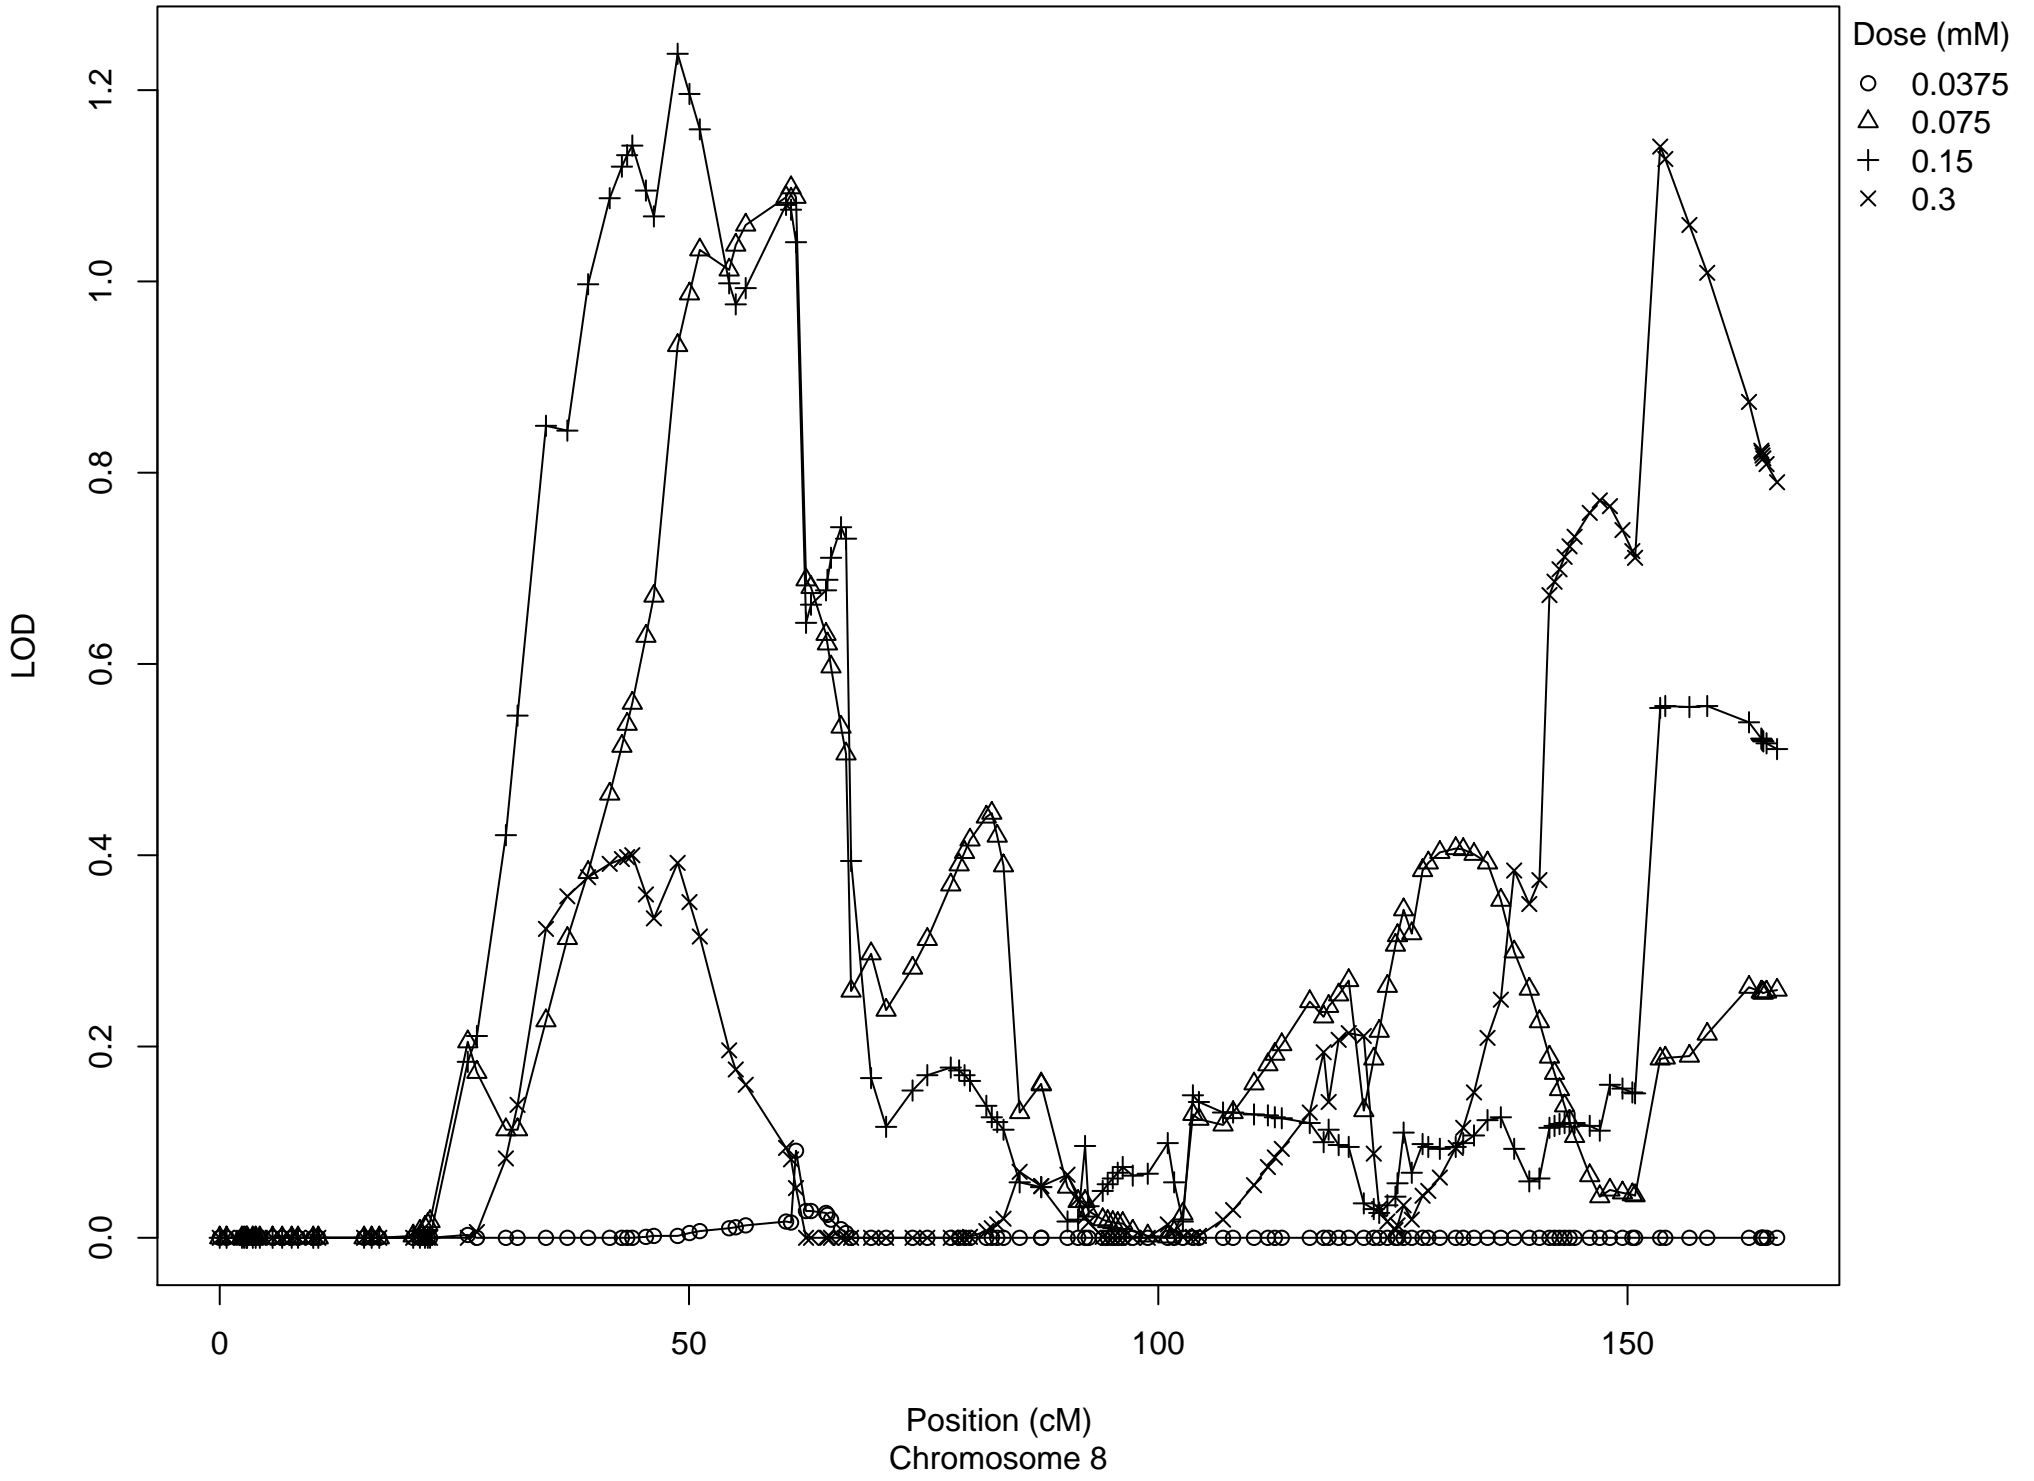



# Hydroxyurea (Hydrox)

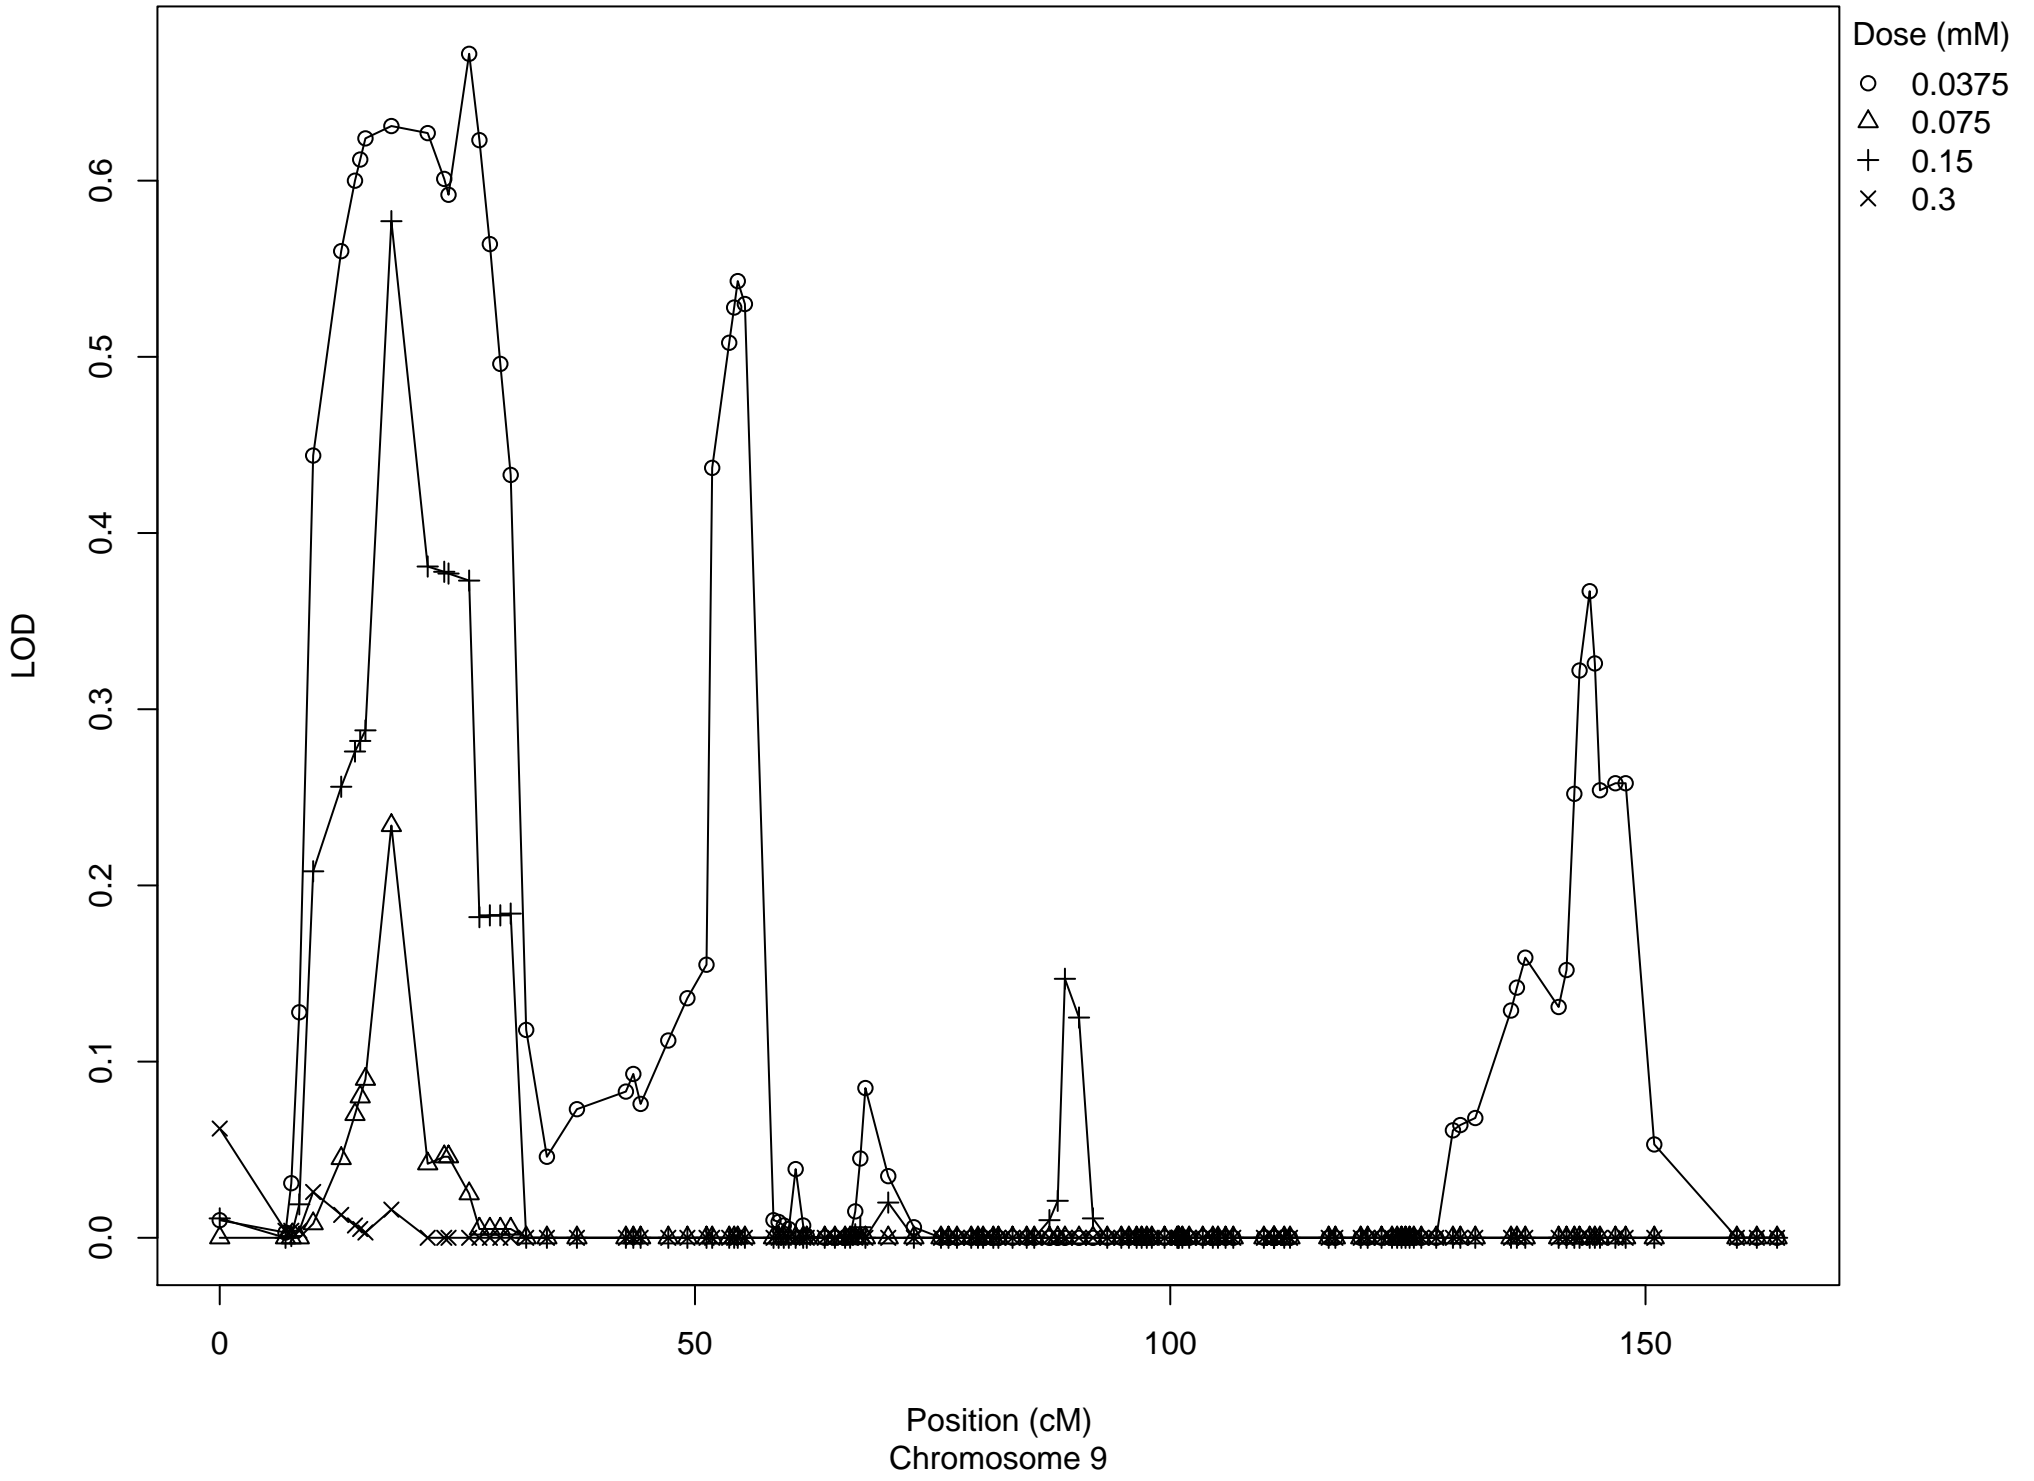

# Hydroxyurea (Hydrox)

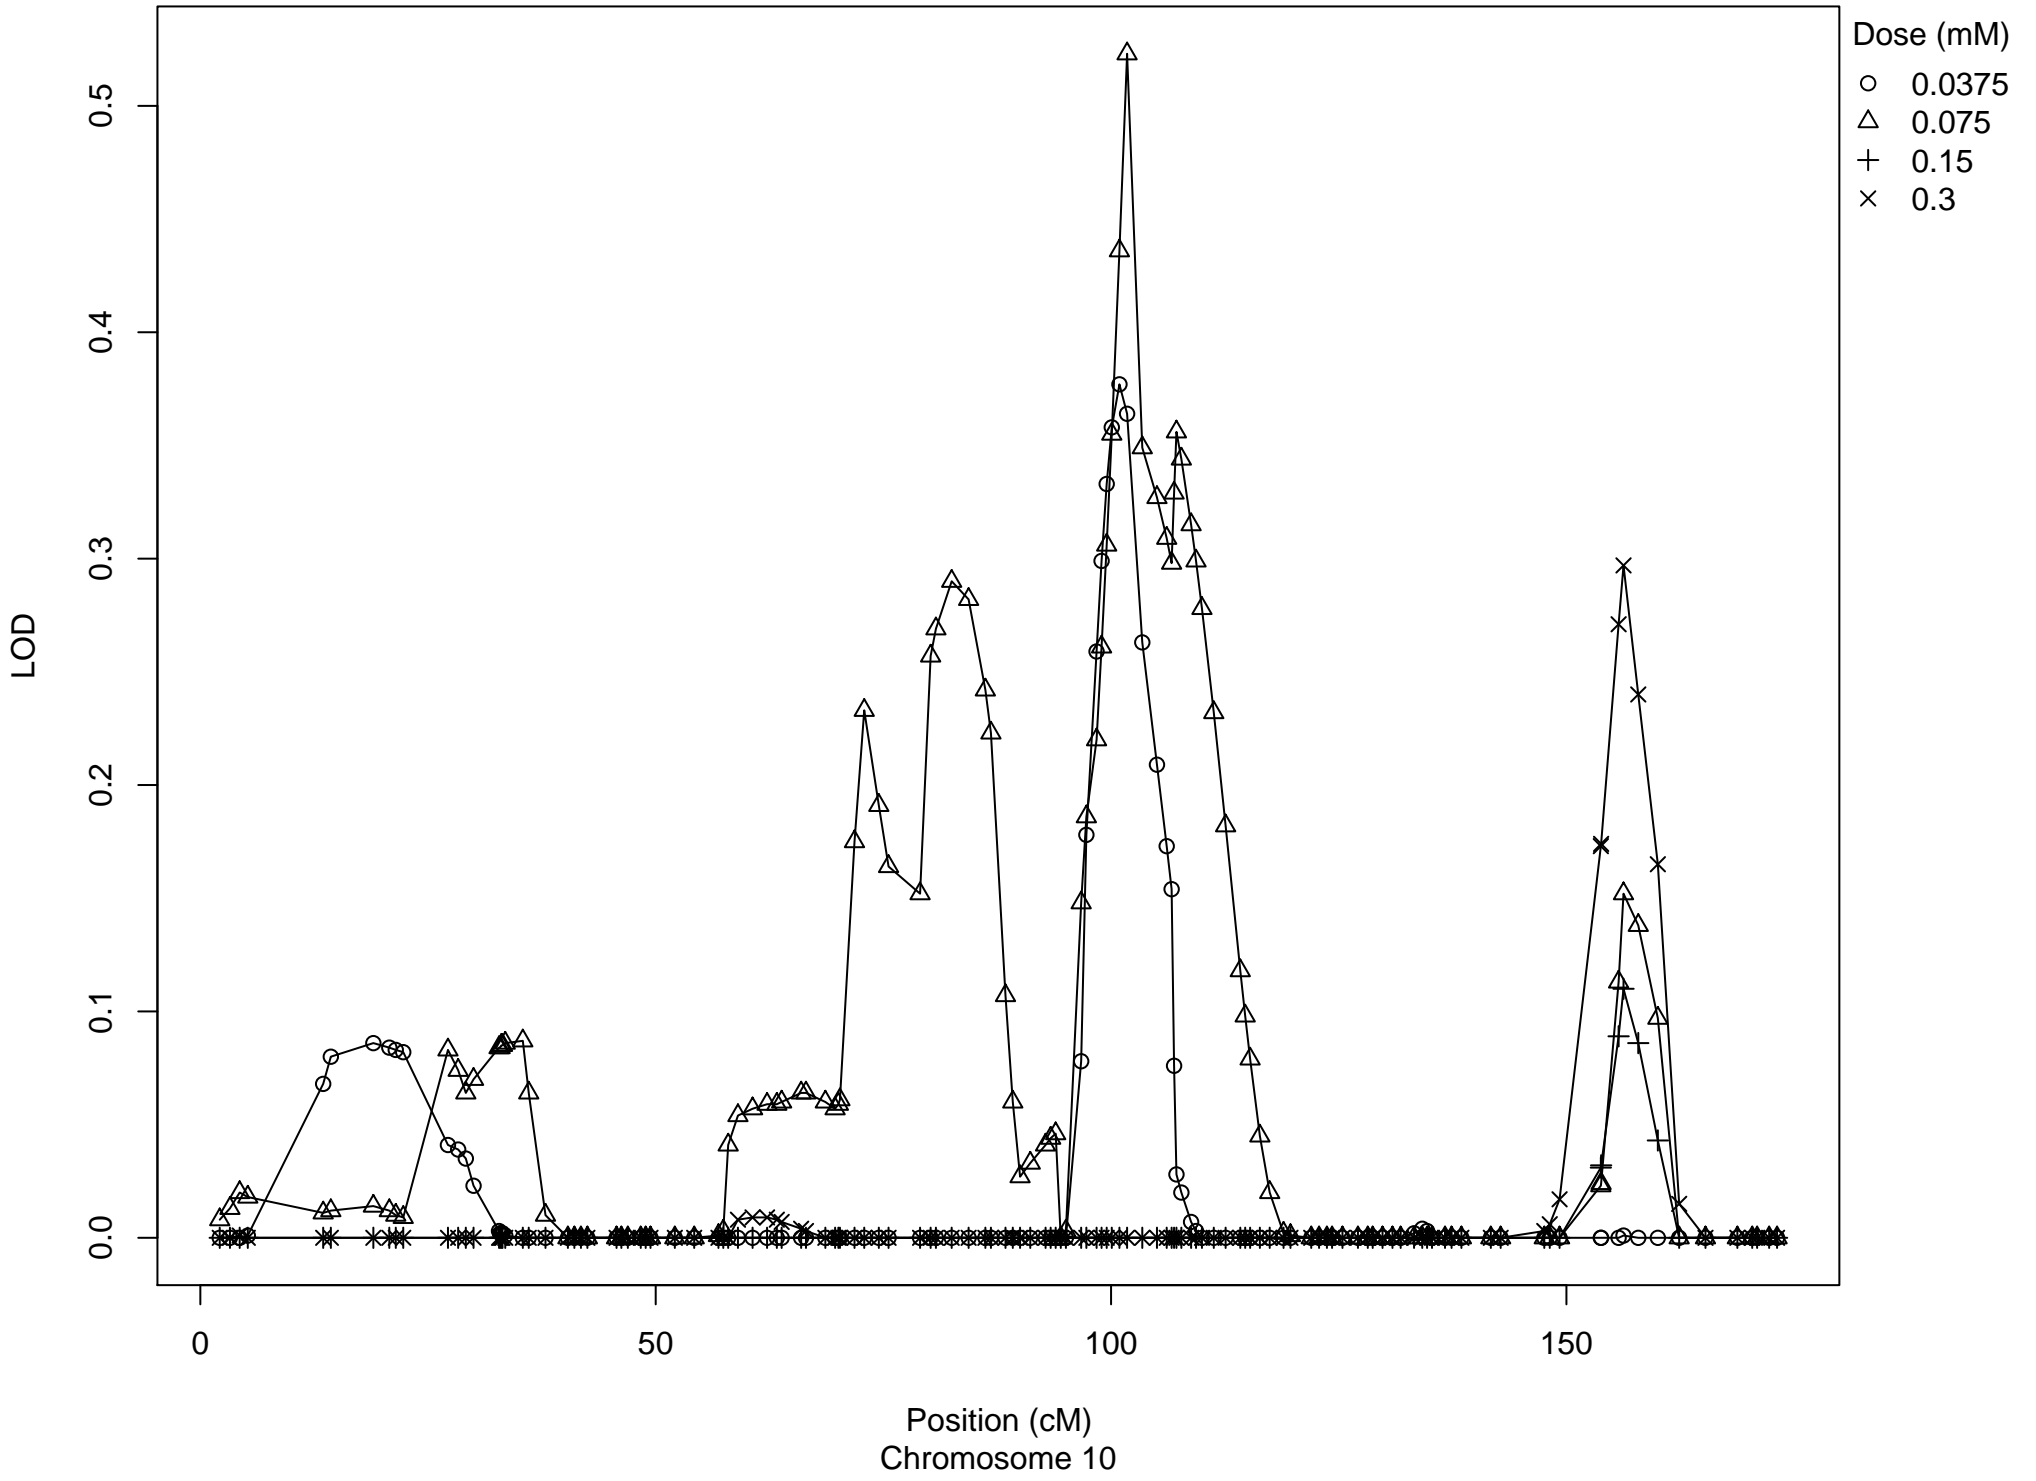

# Hydroxyurea (Hydrox)

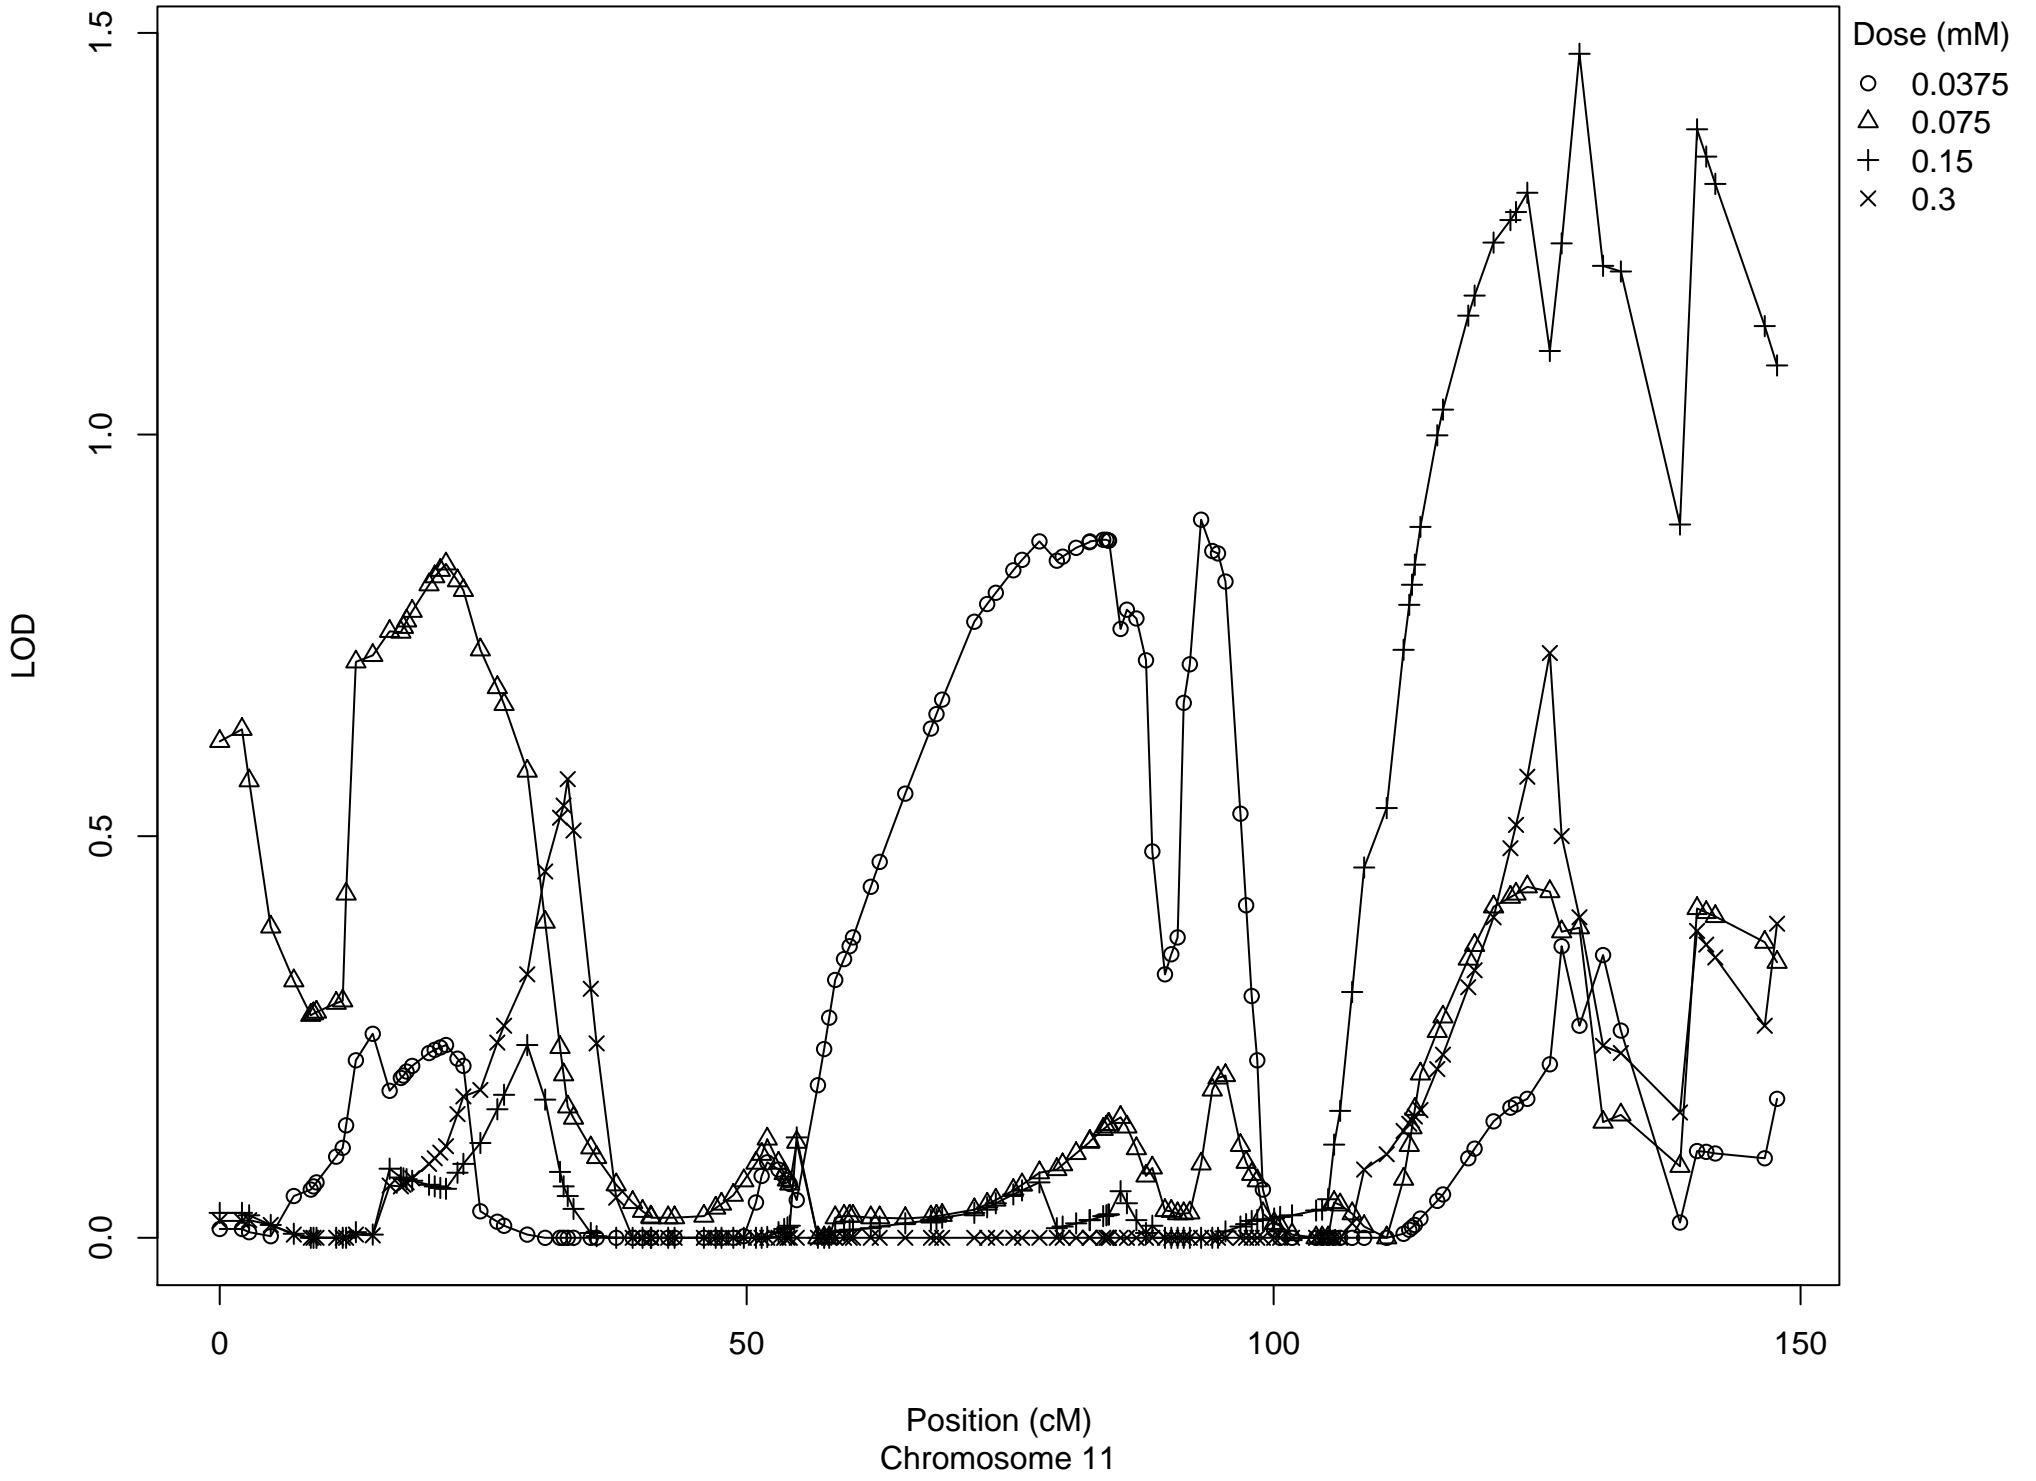

# Hydroxyurea (Hydrox)

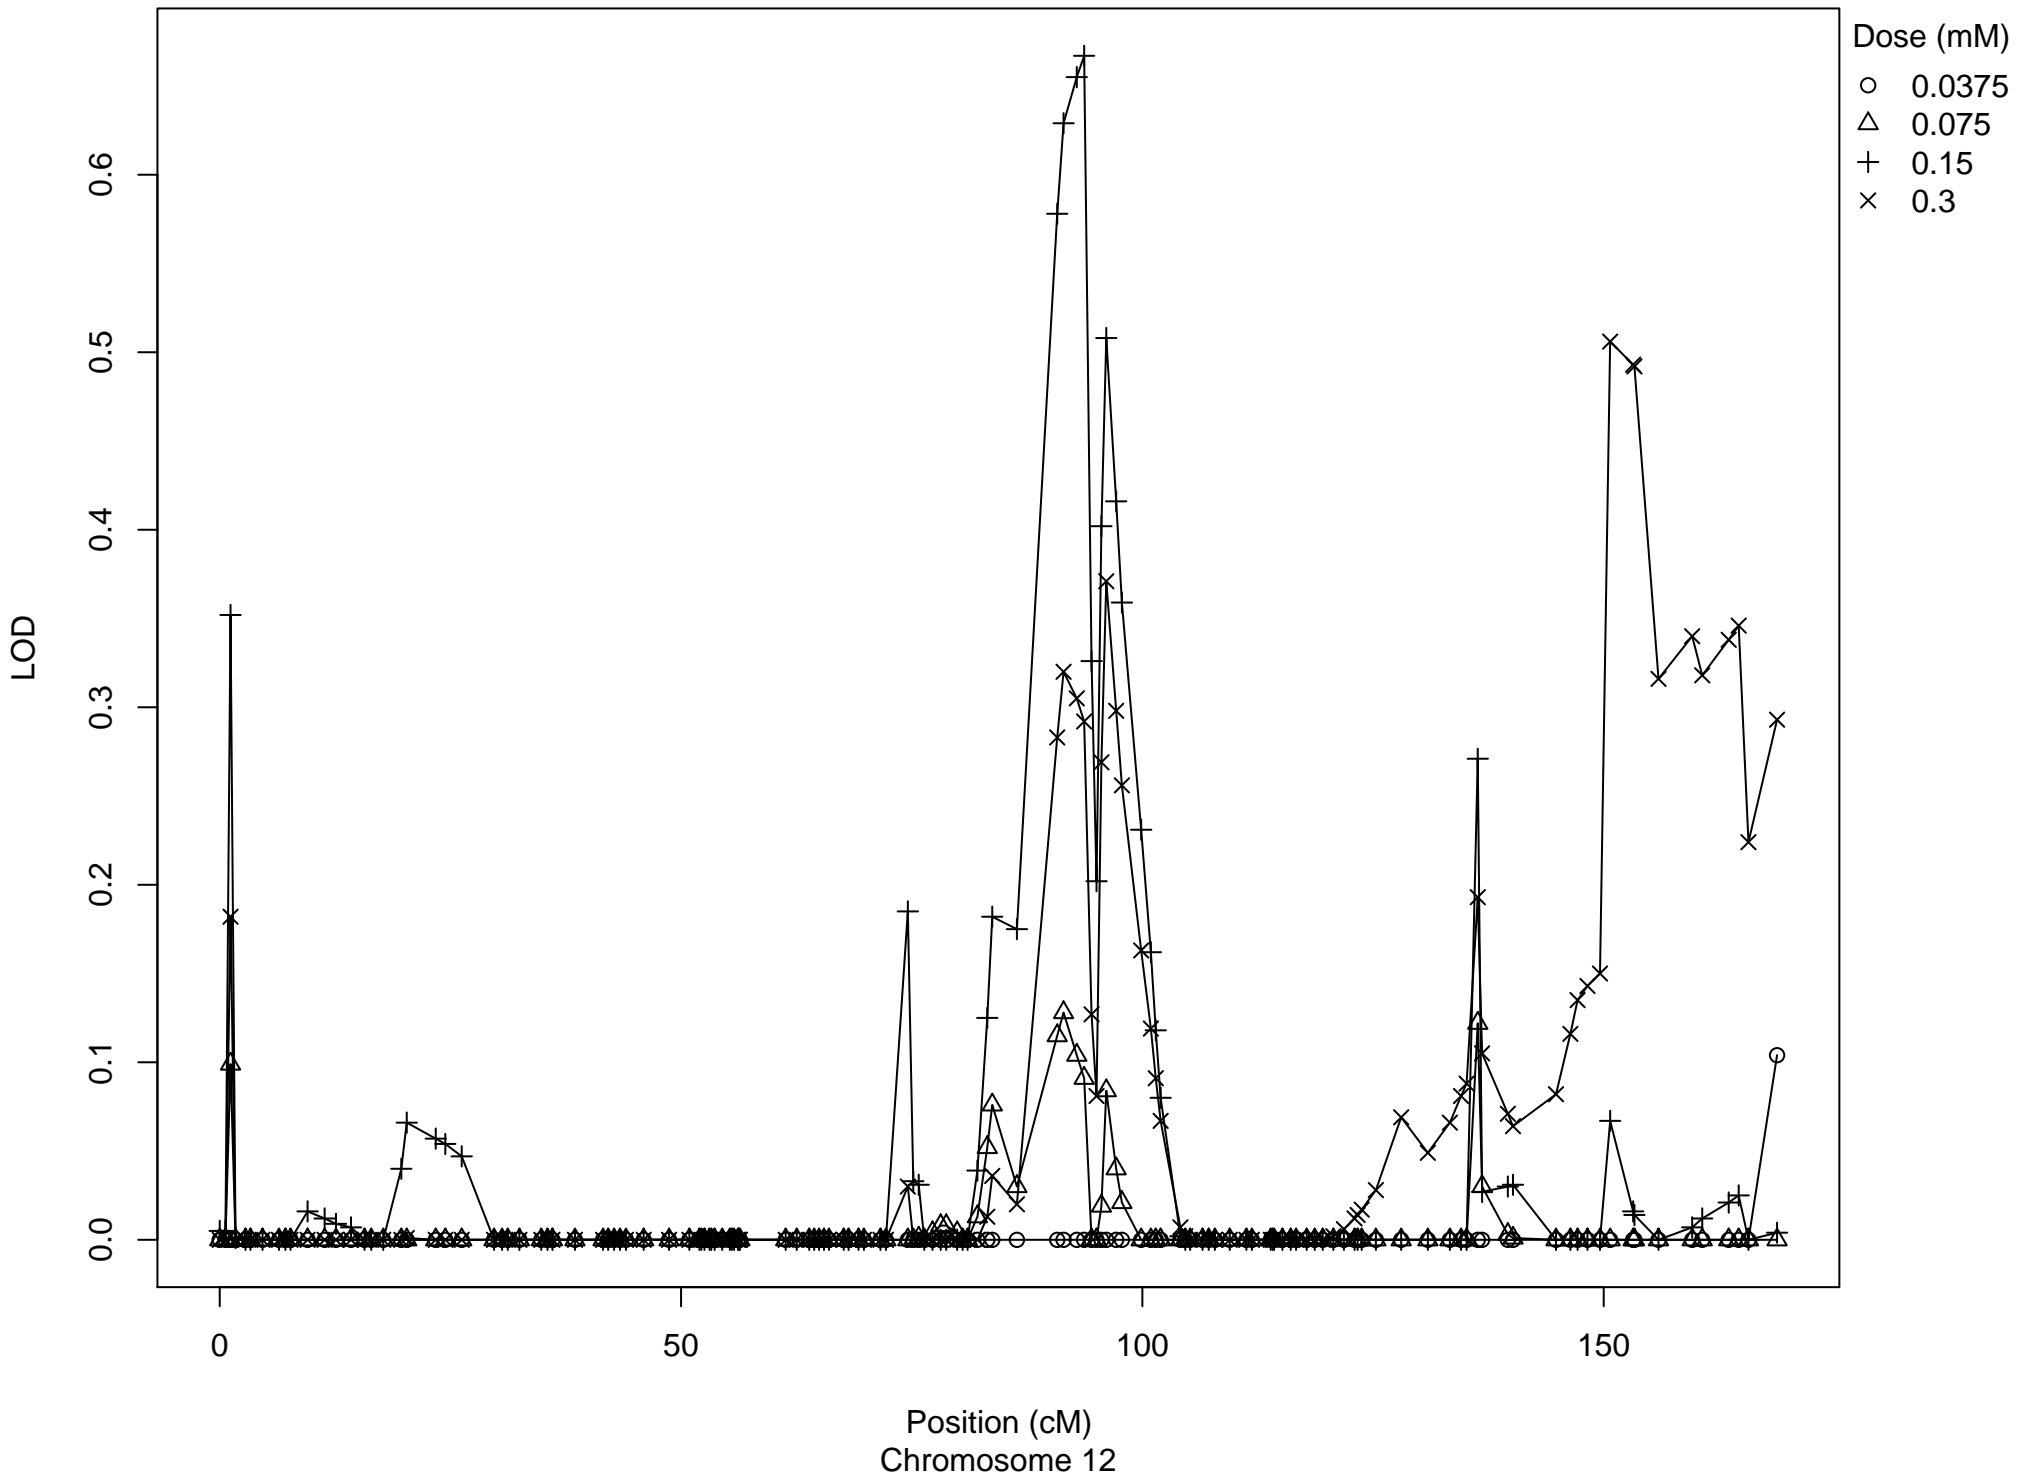

# Hydroxyurea (Hydrox)

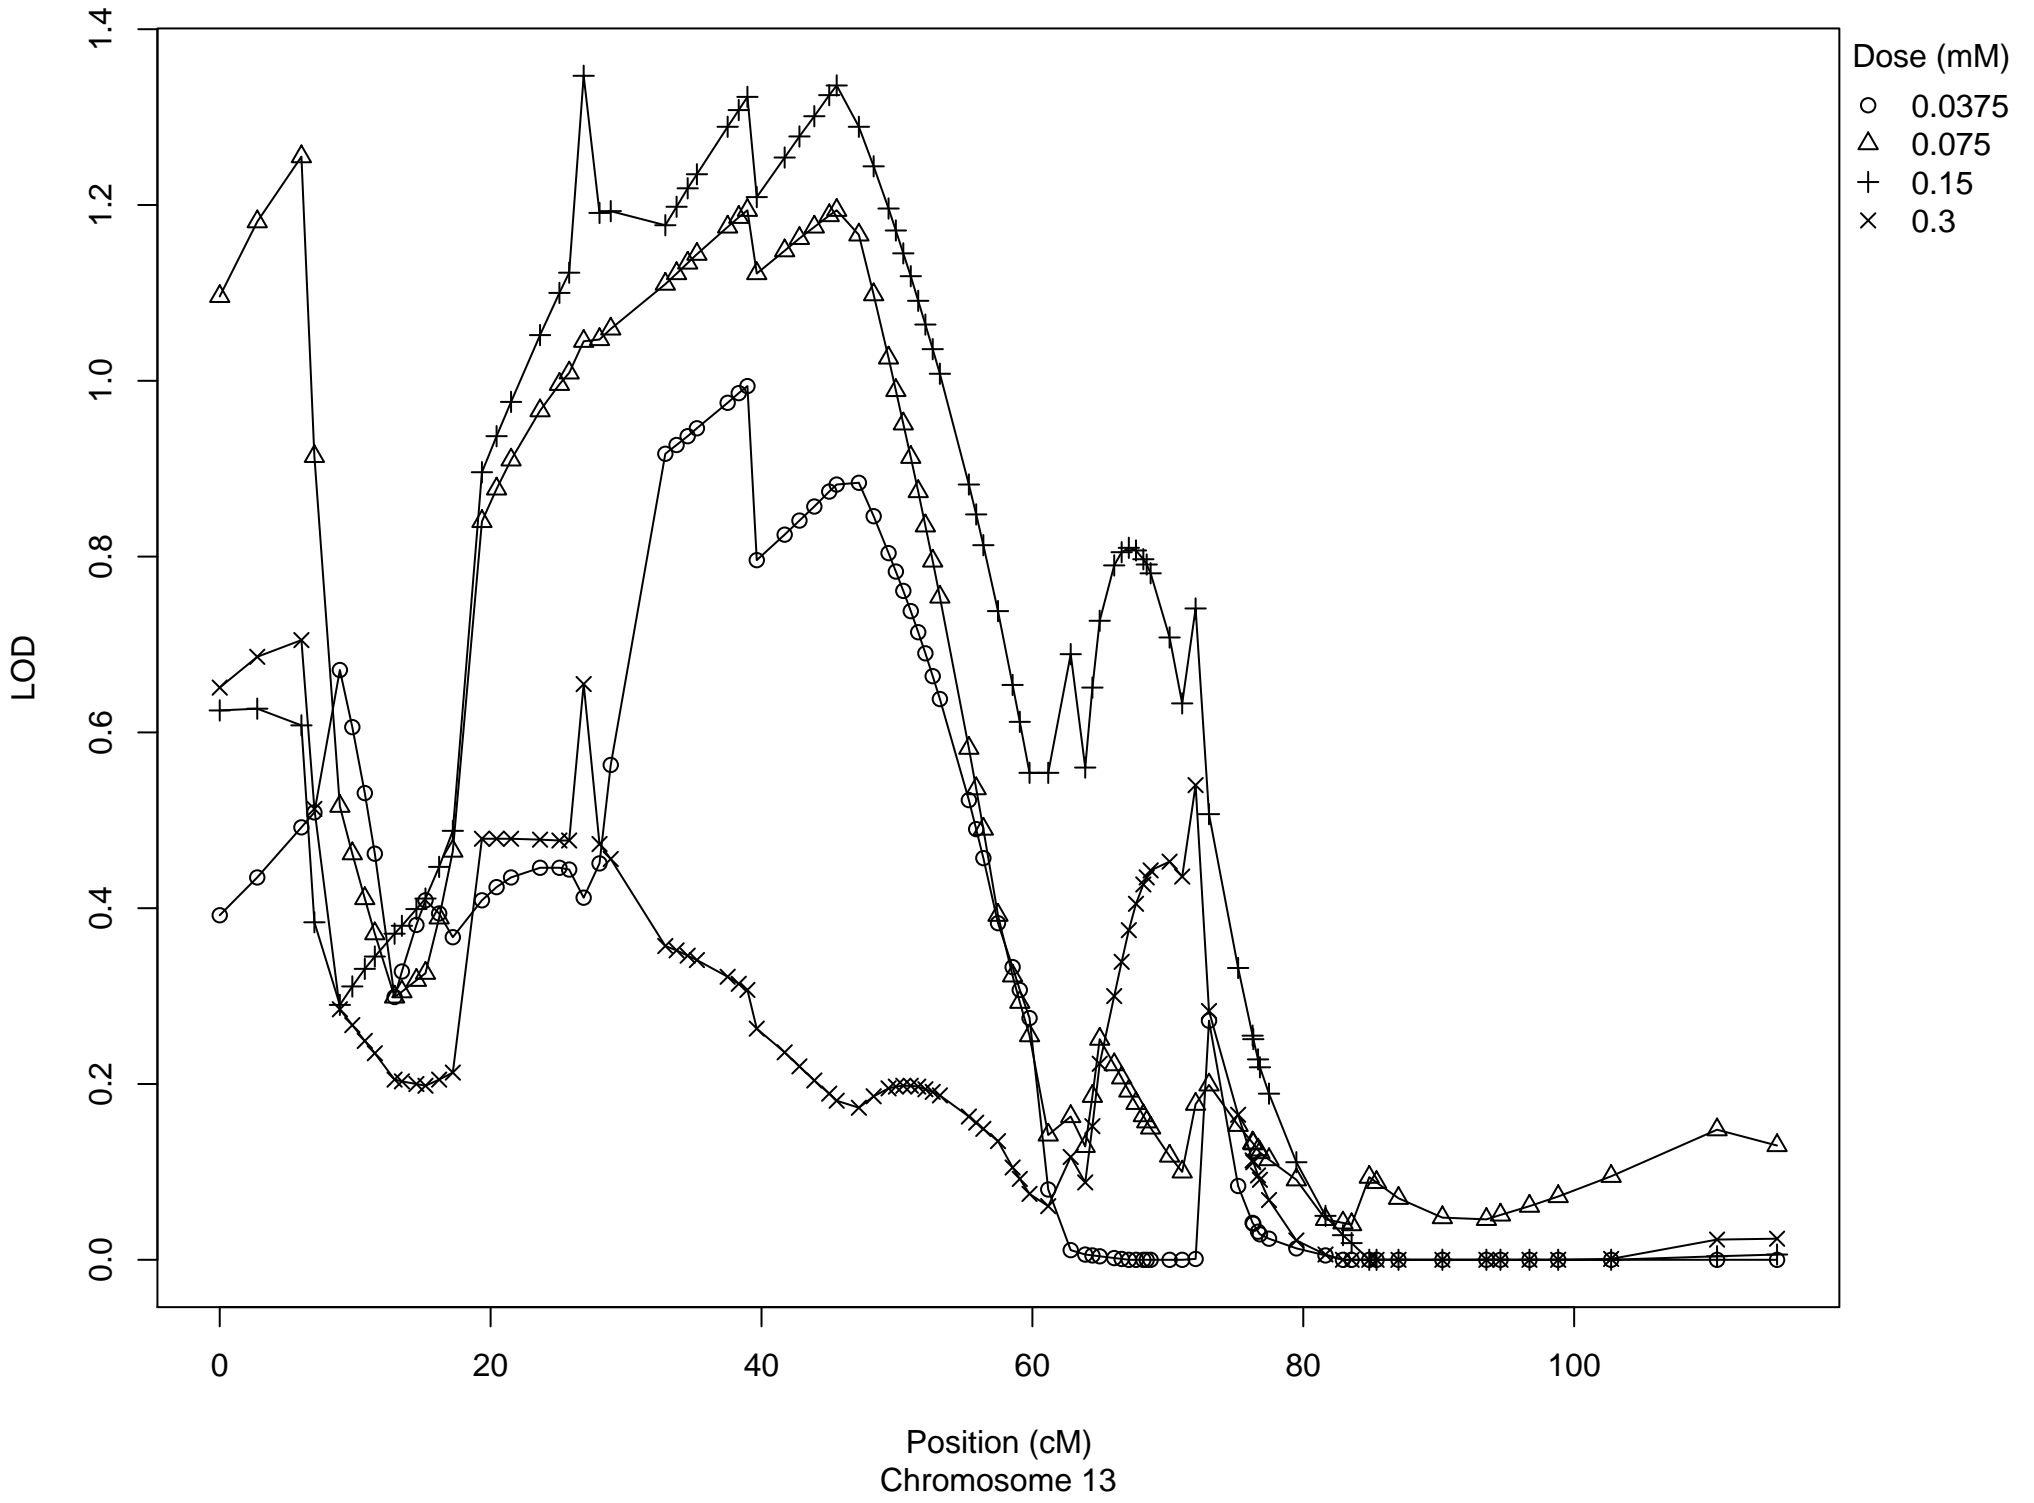

# Hydroxyurea (Hydrox)

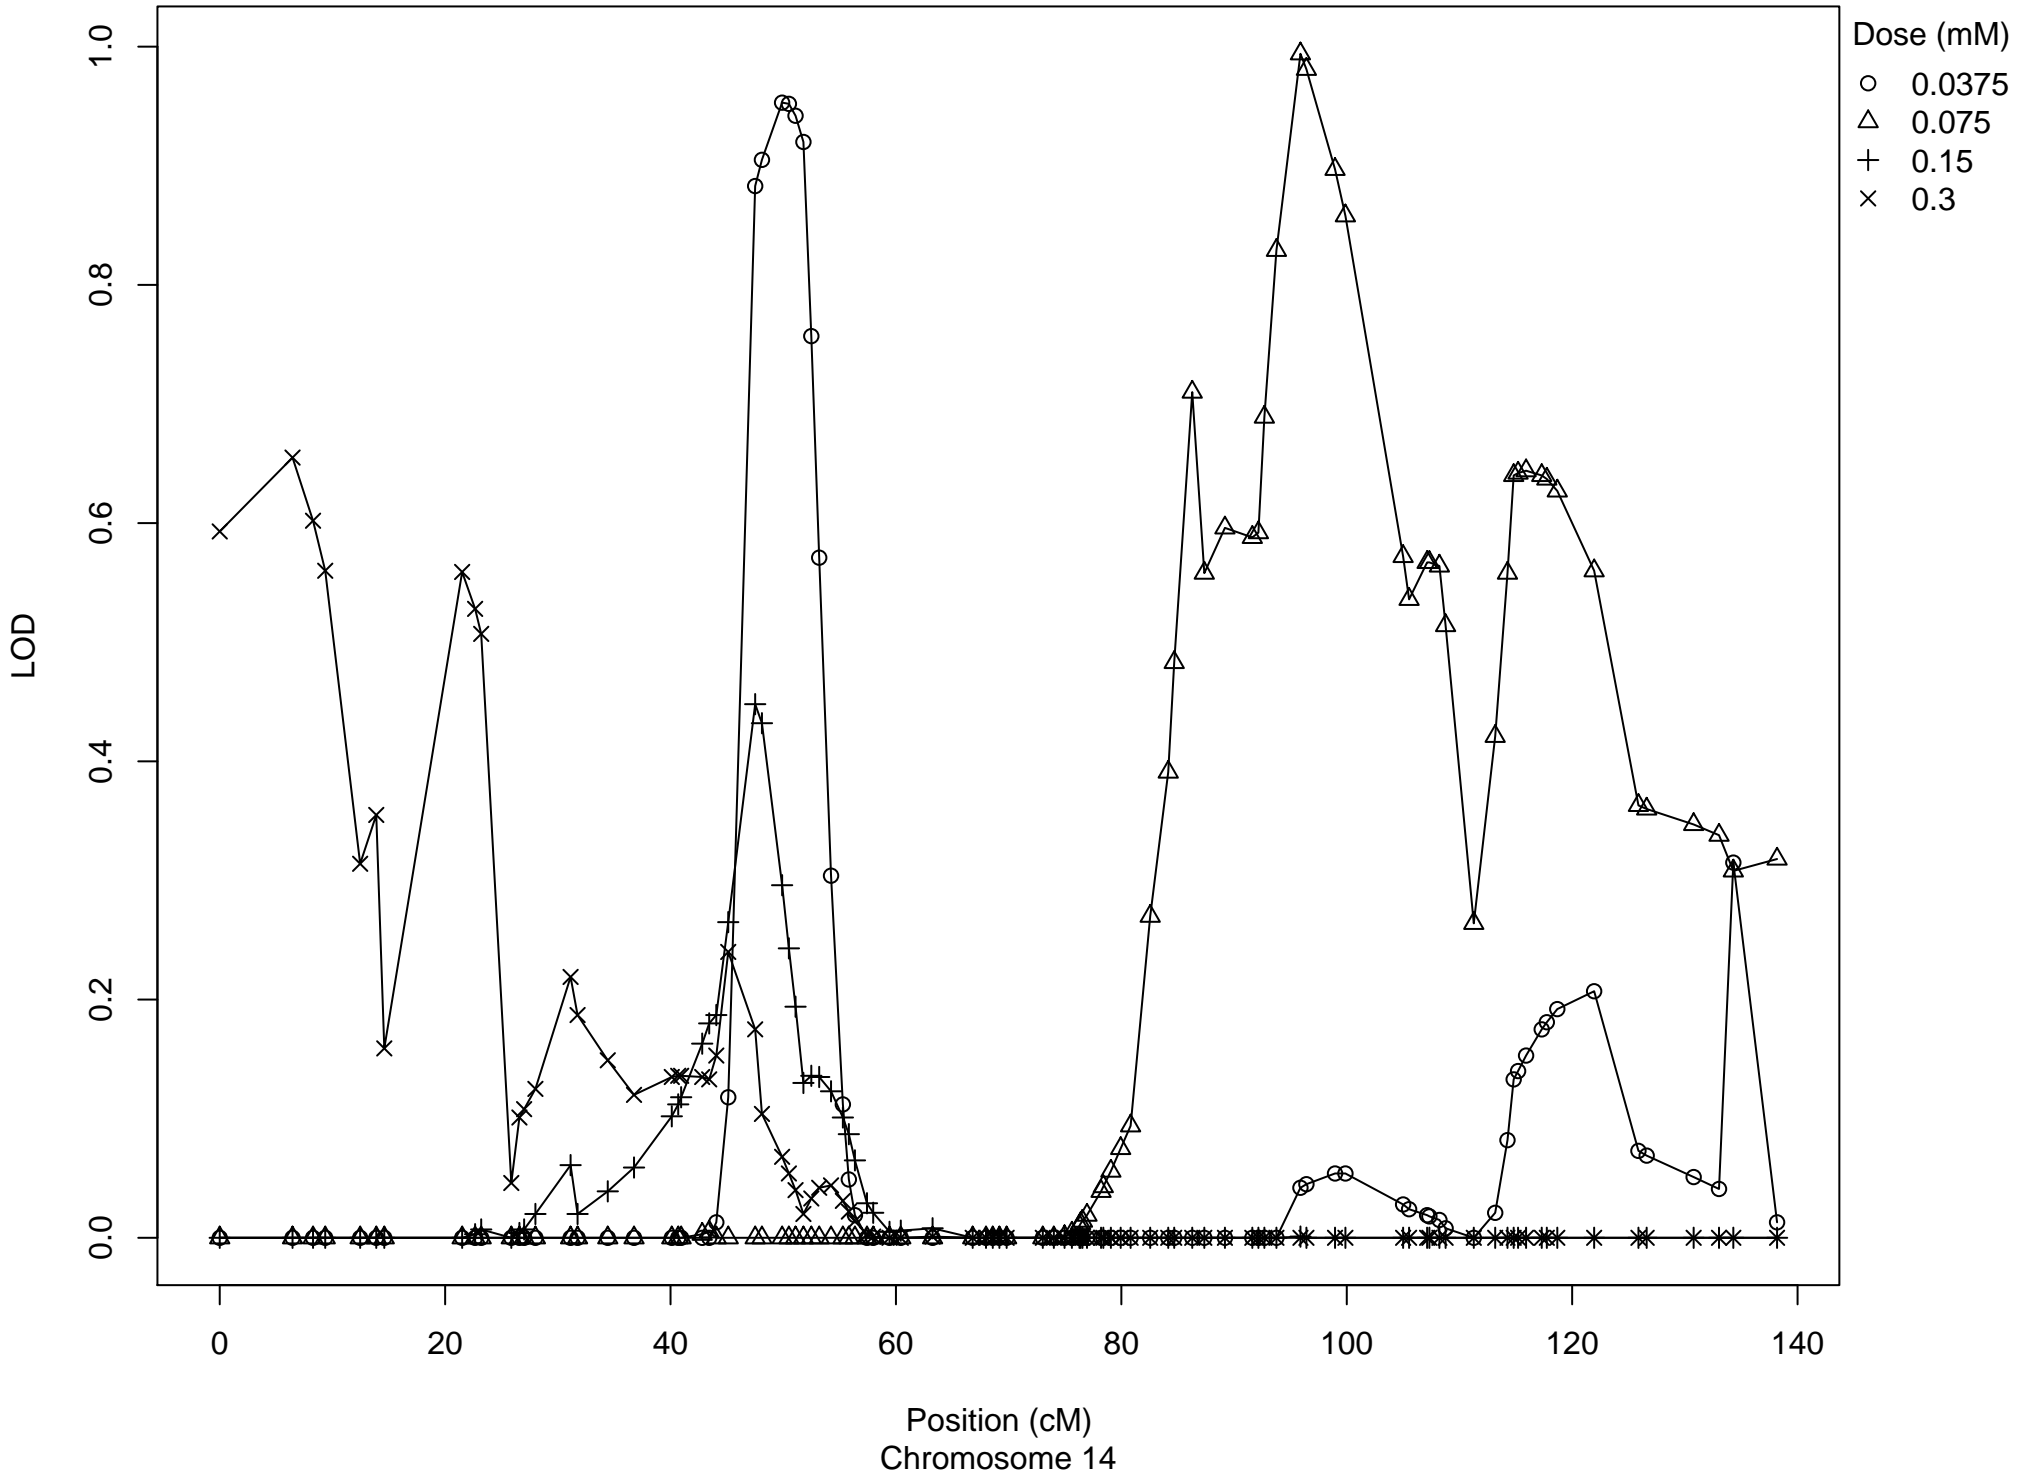

# Hydroxyurea (Hydrox)

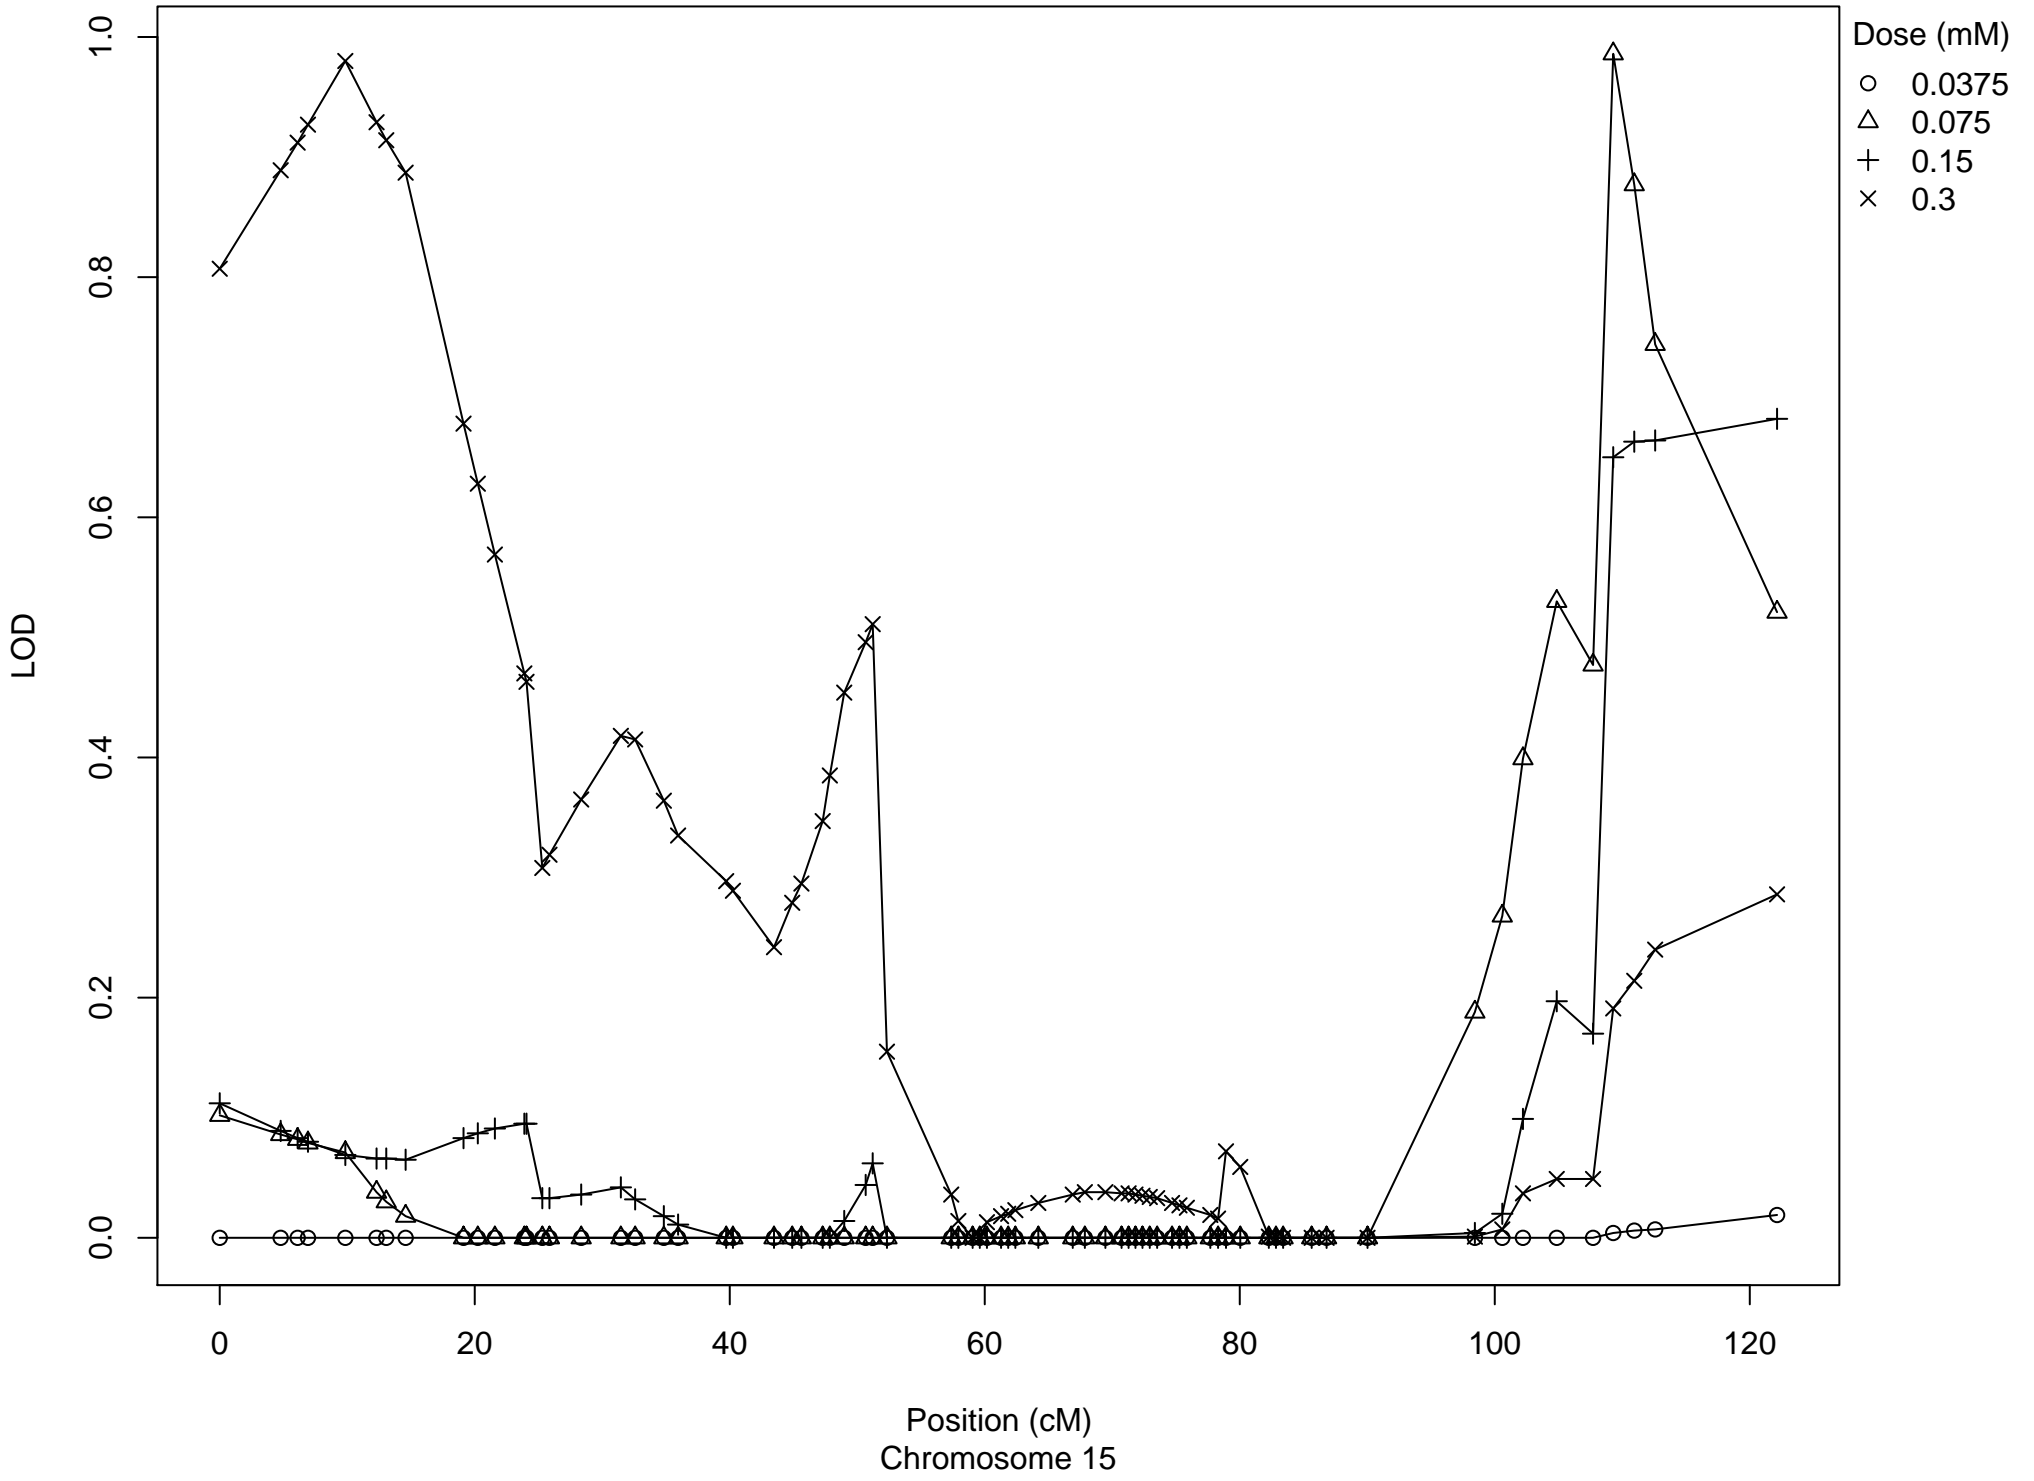

# Hydroxyurea (Hydrox)

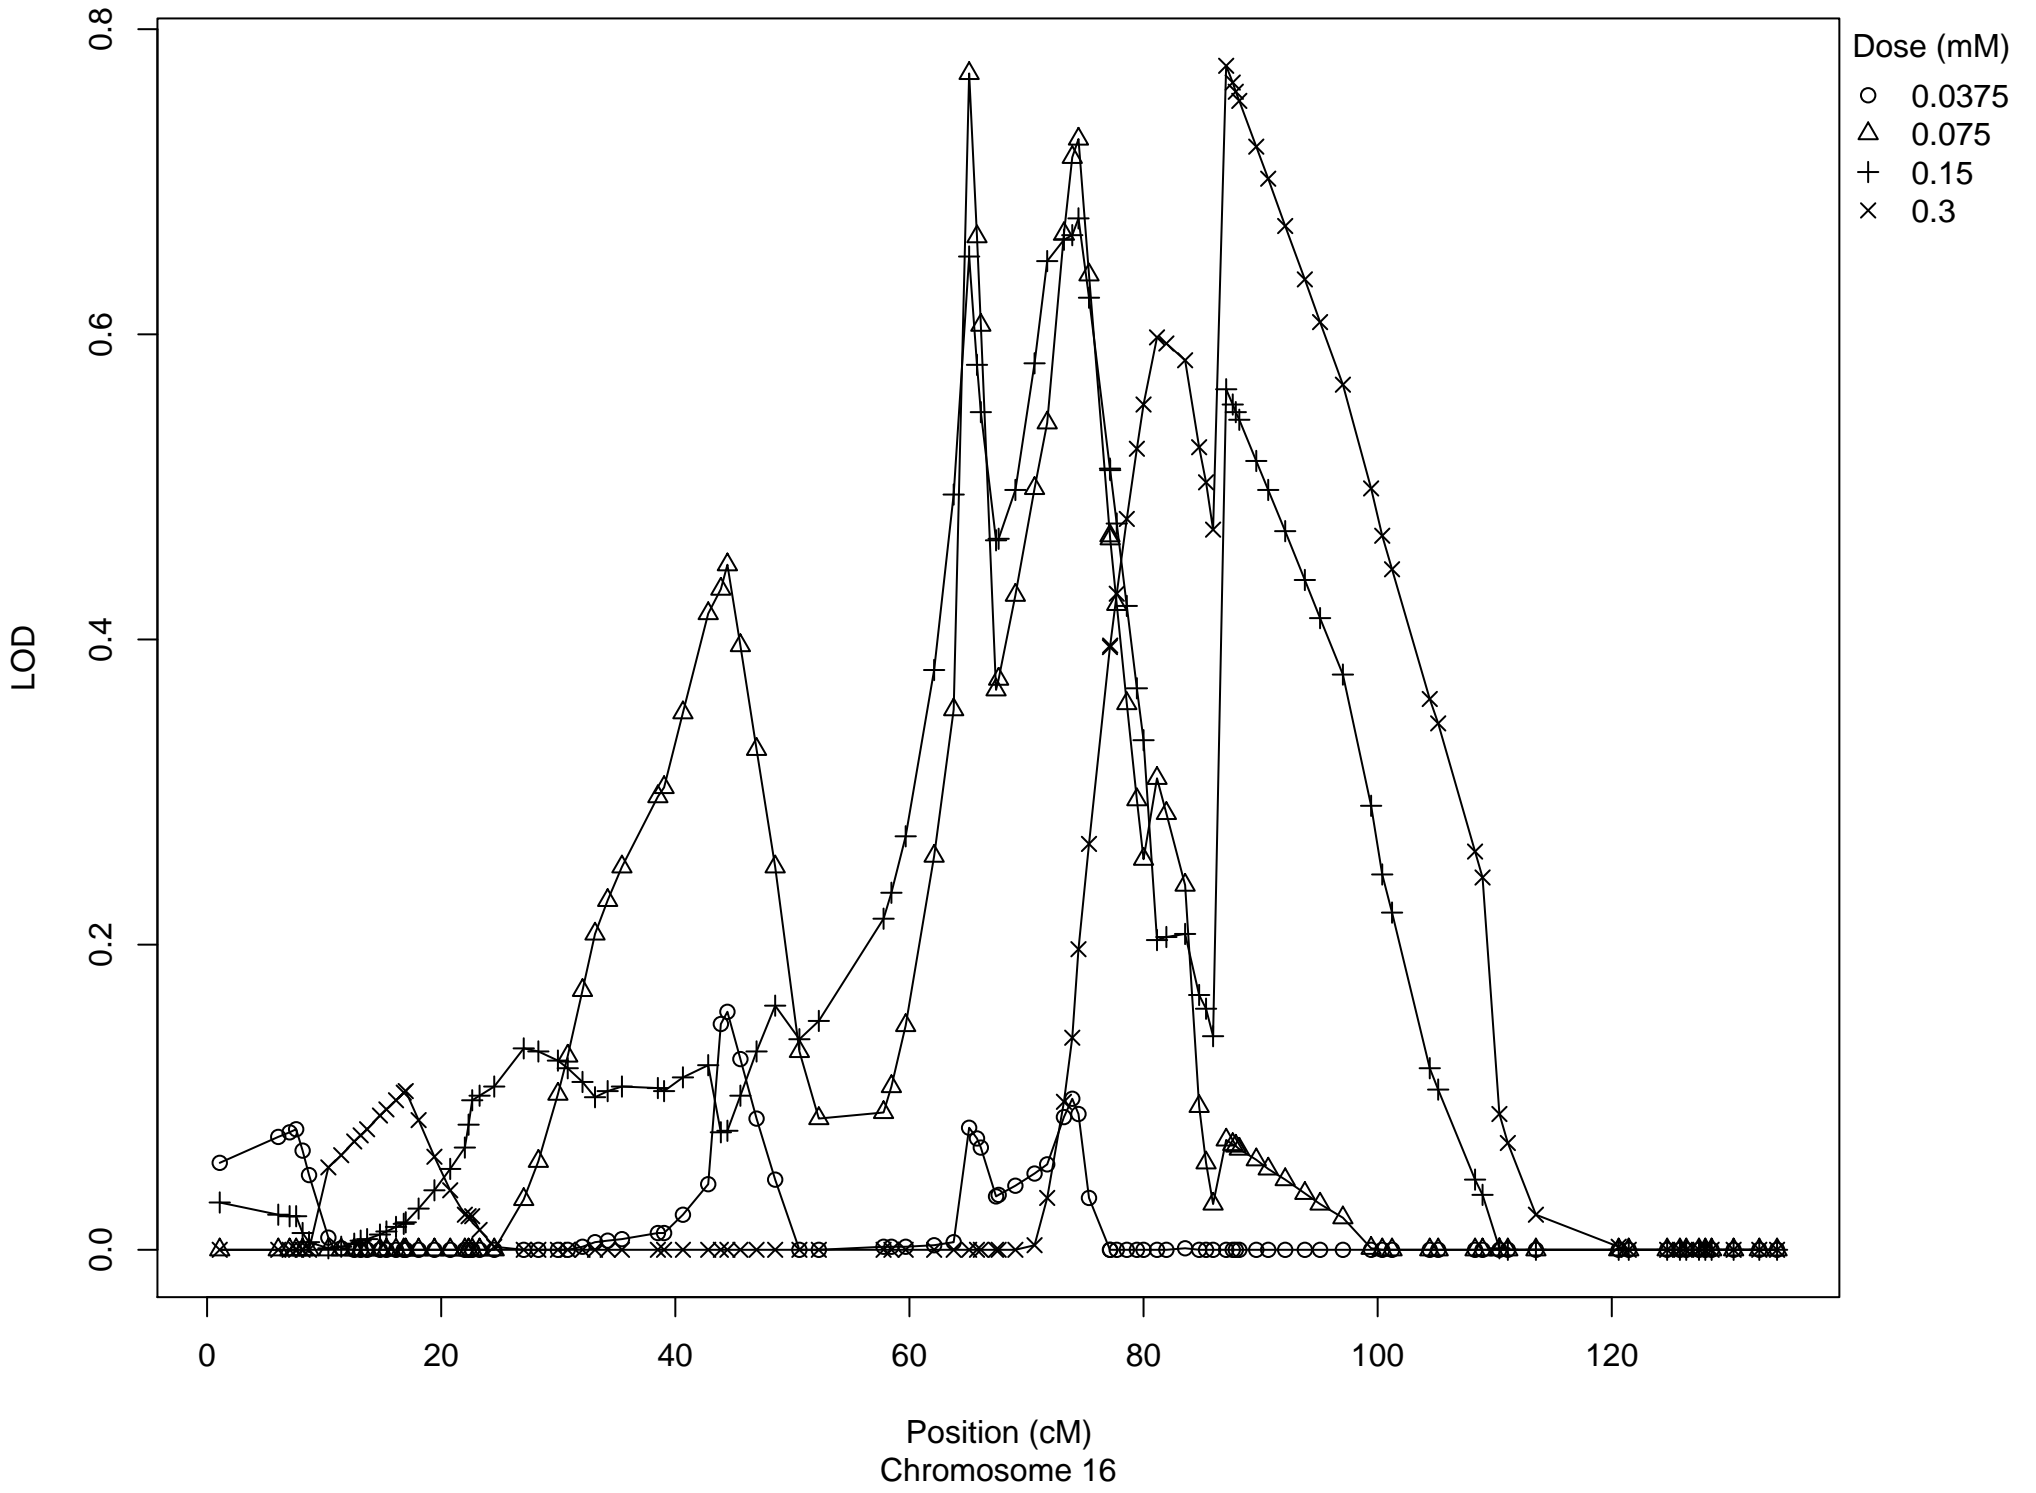



# Hydroxyurea (Hydrox)

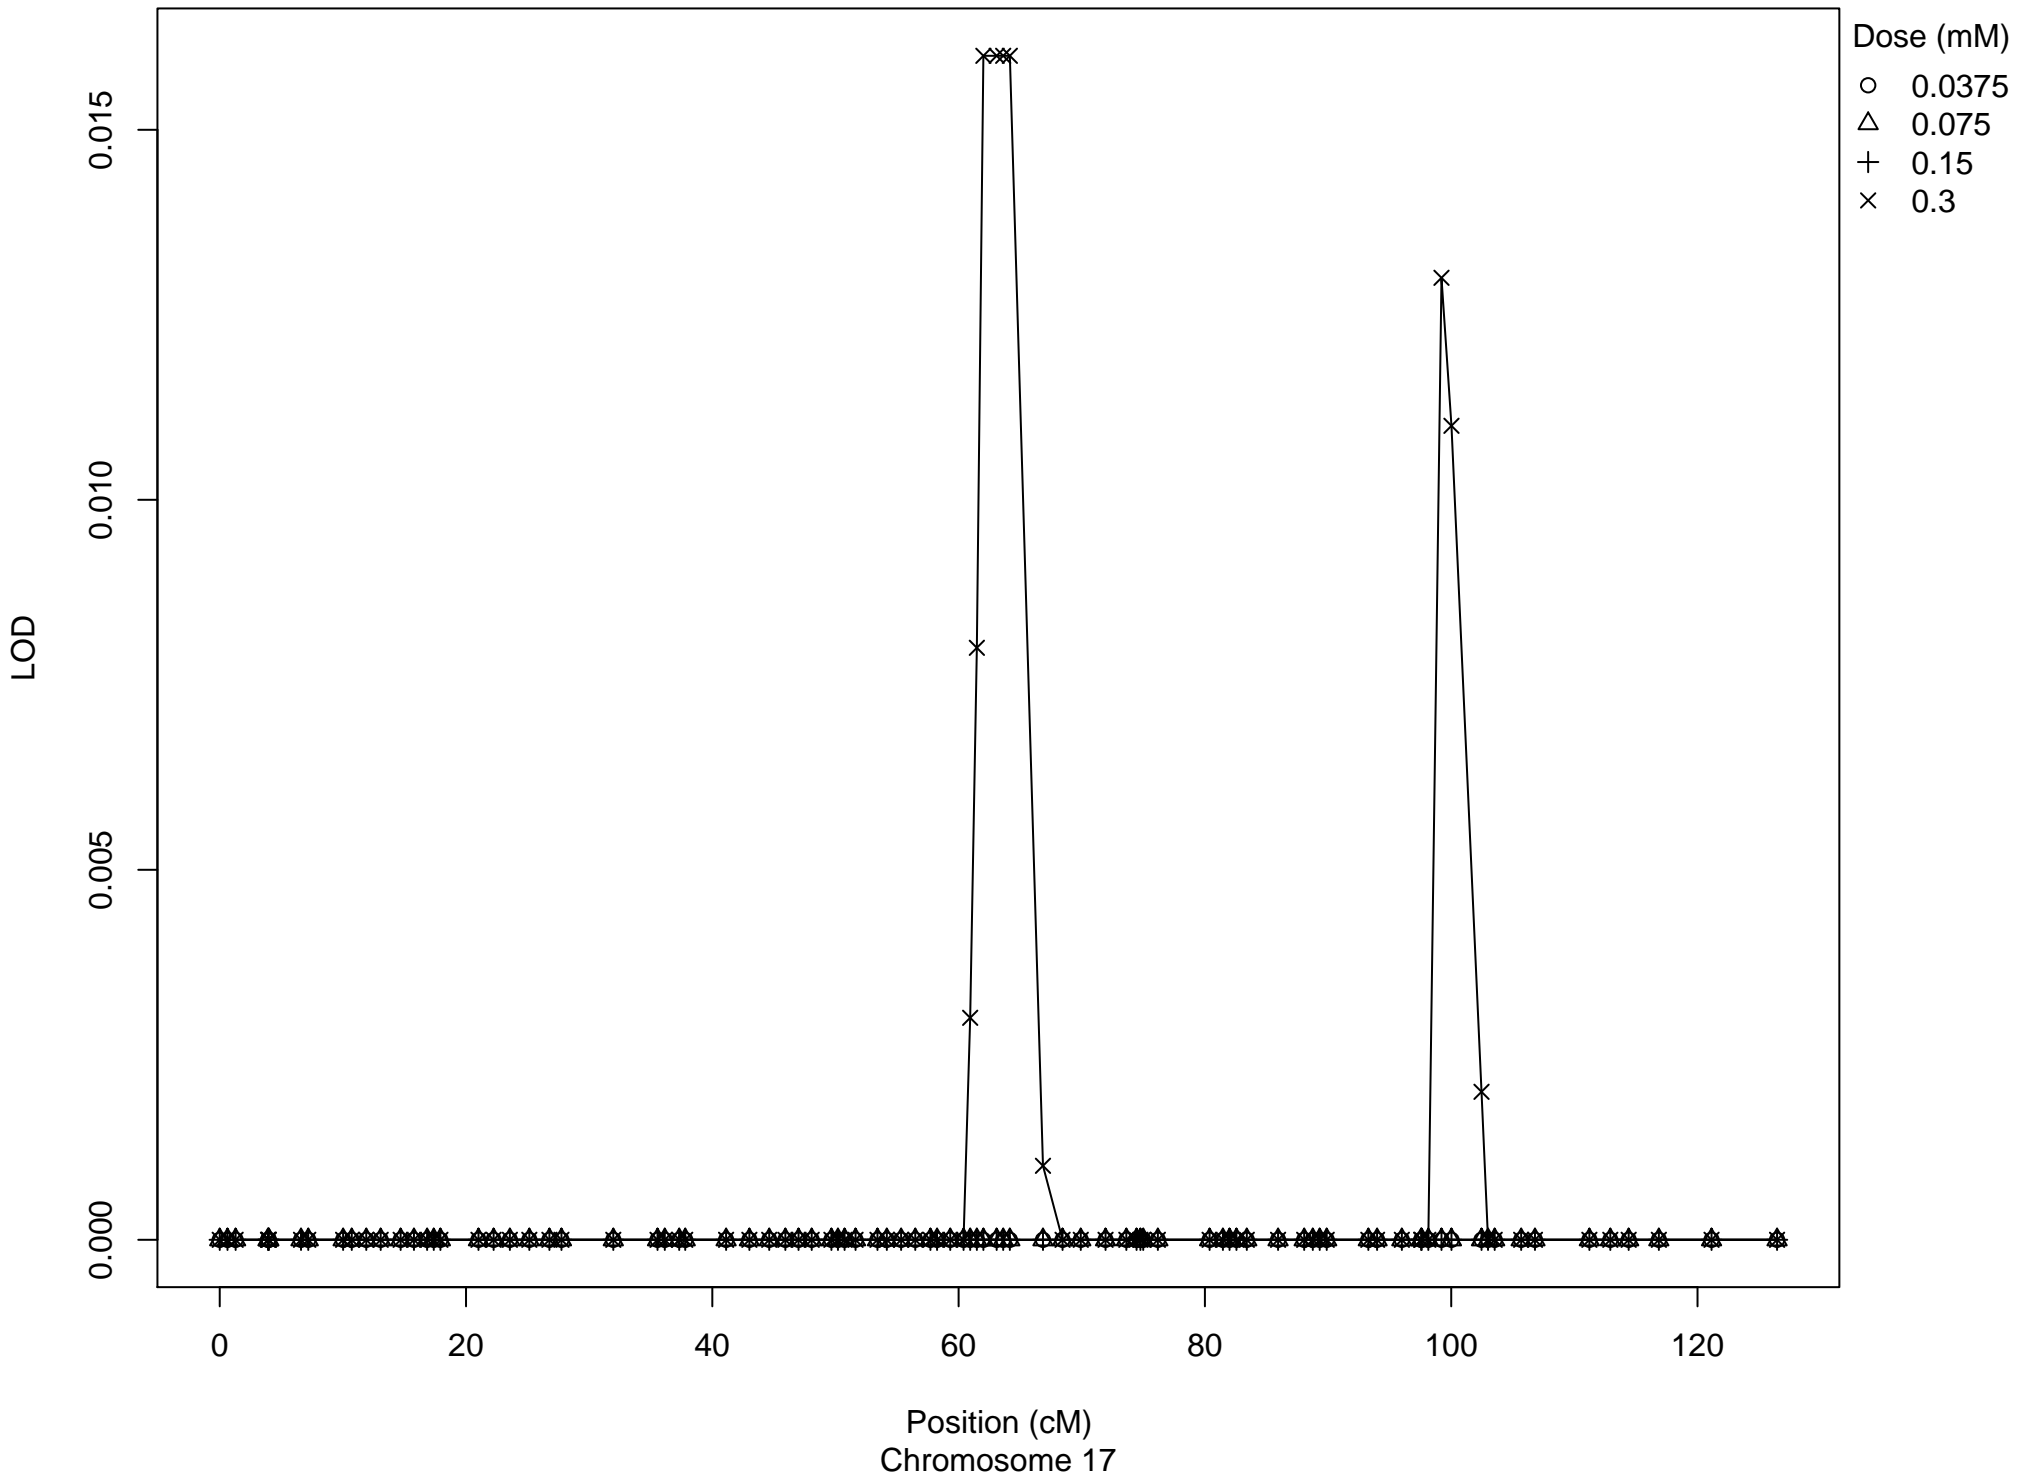

# Hydroxyurea (Hydrox)

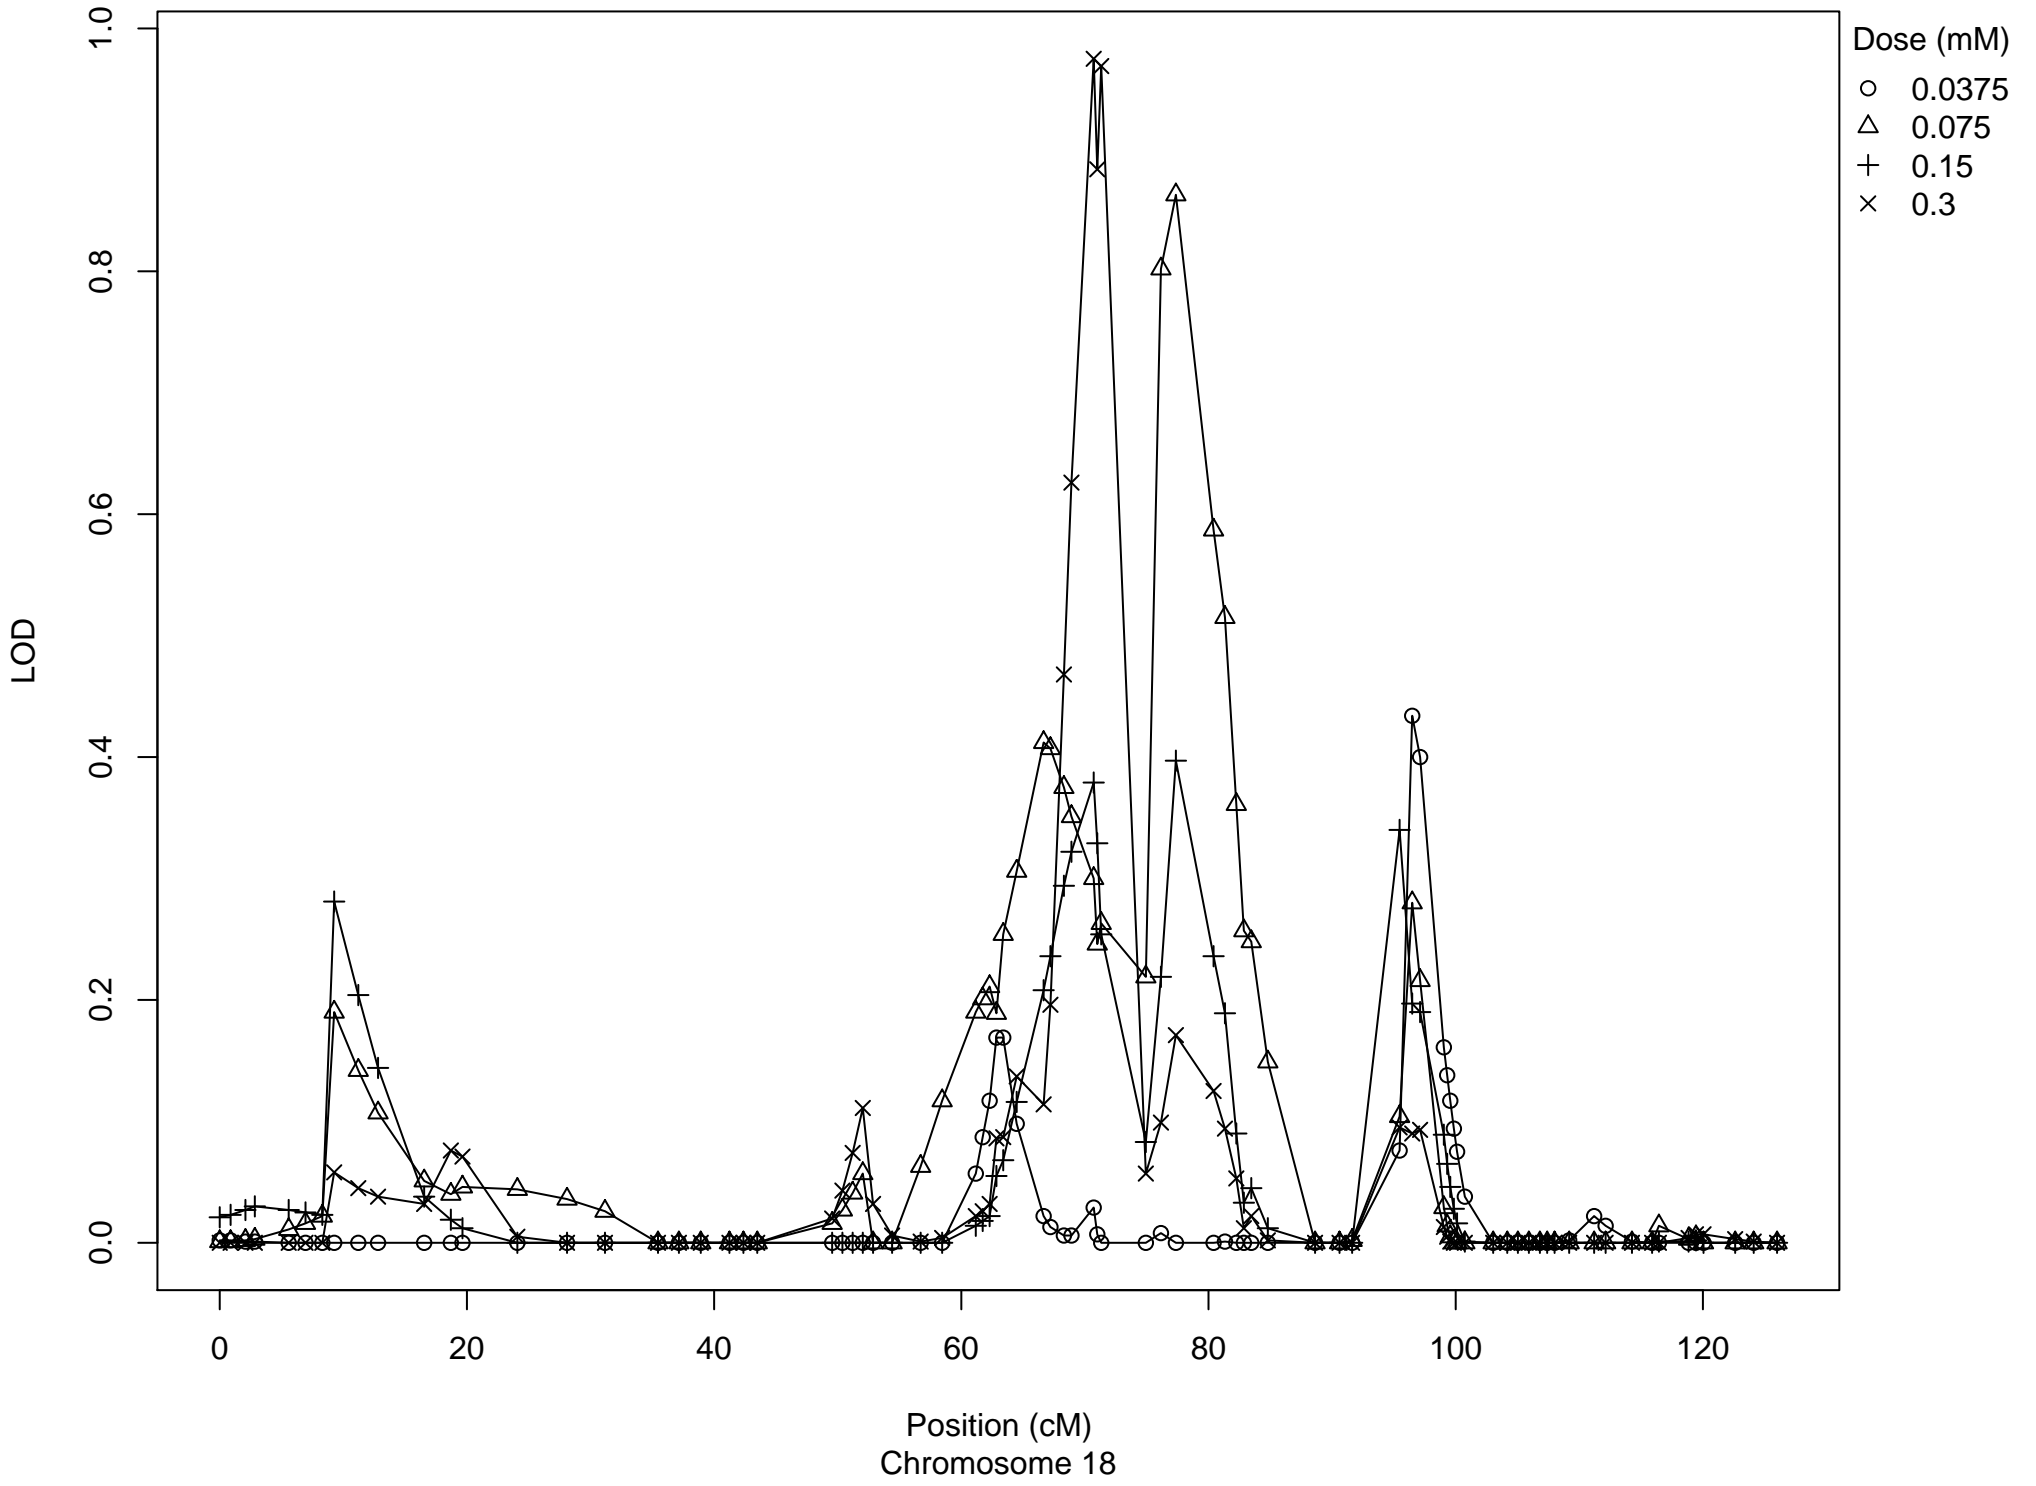

# Hydroxyurea (Hydrox)

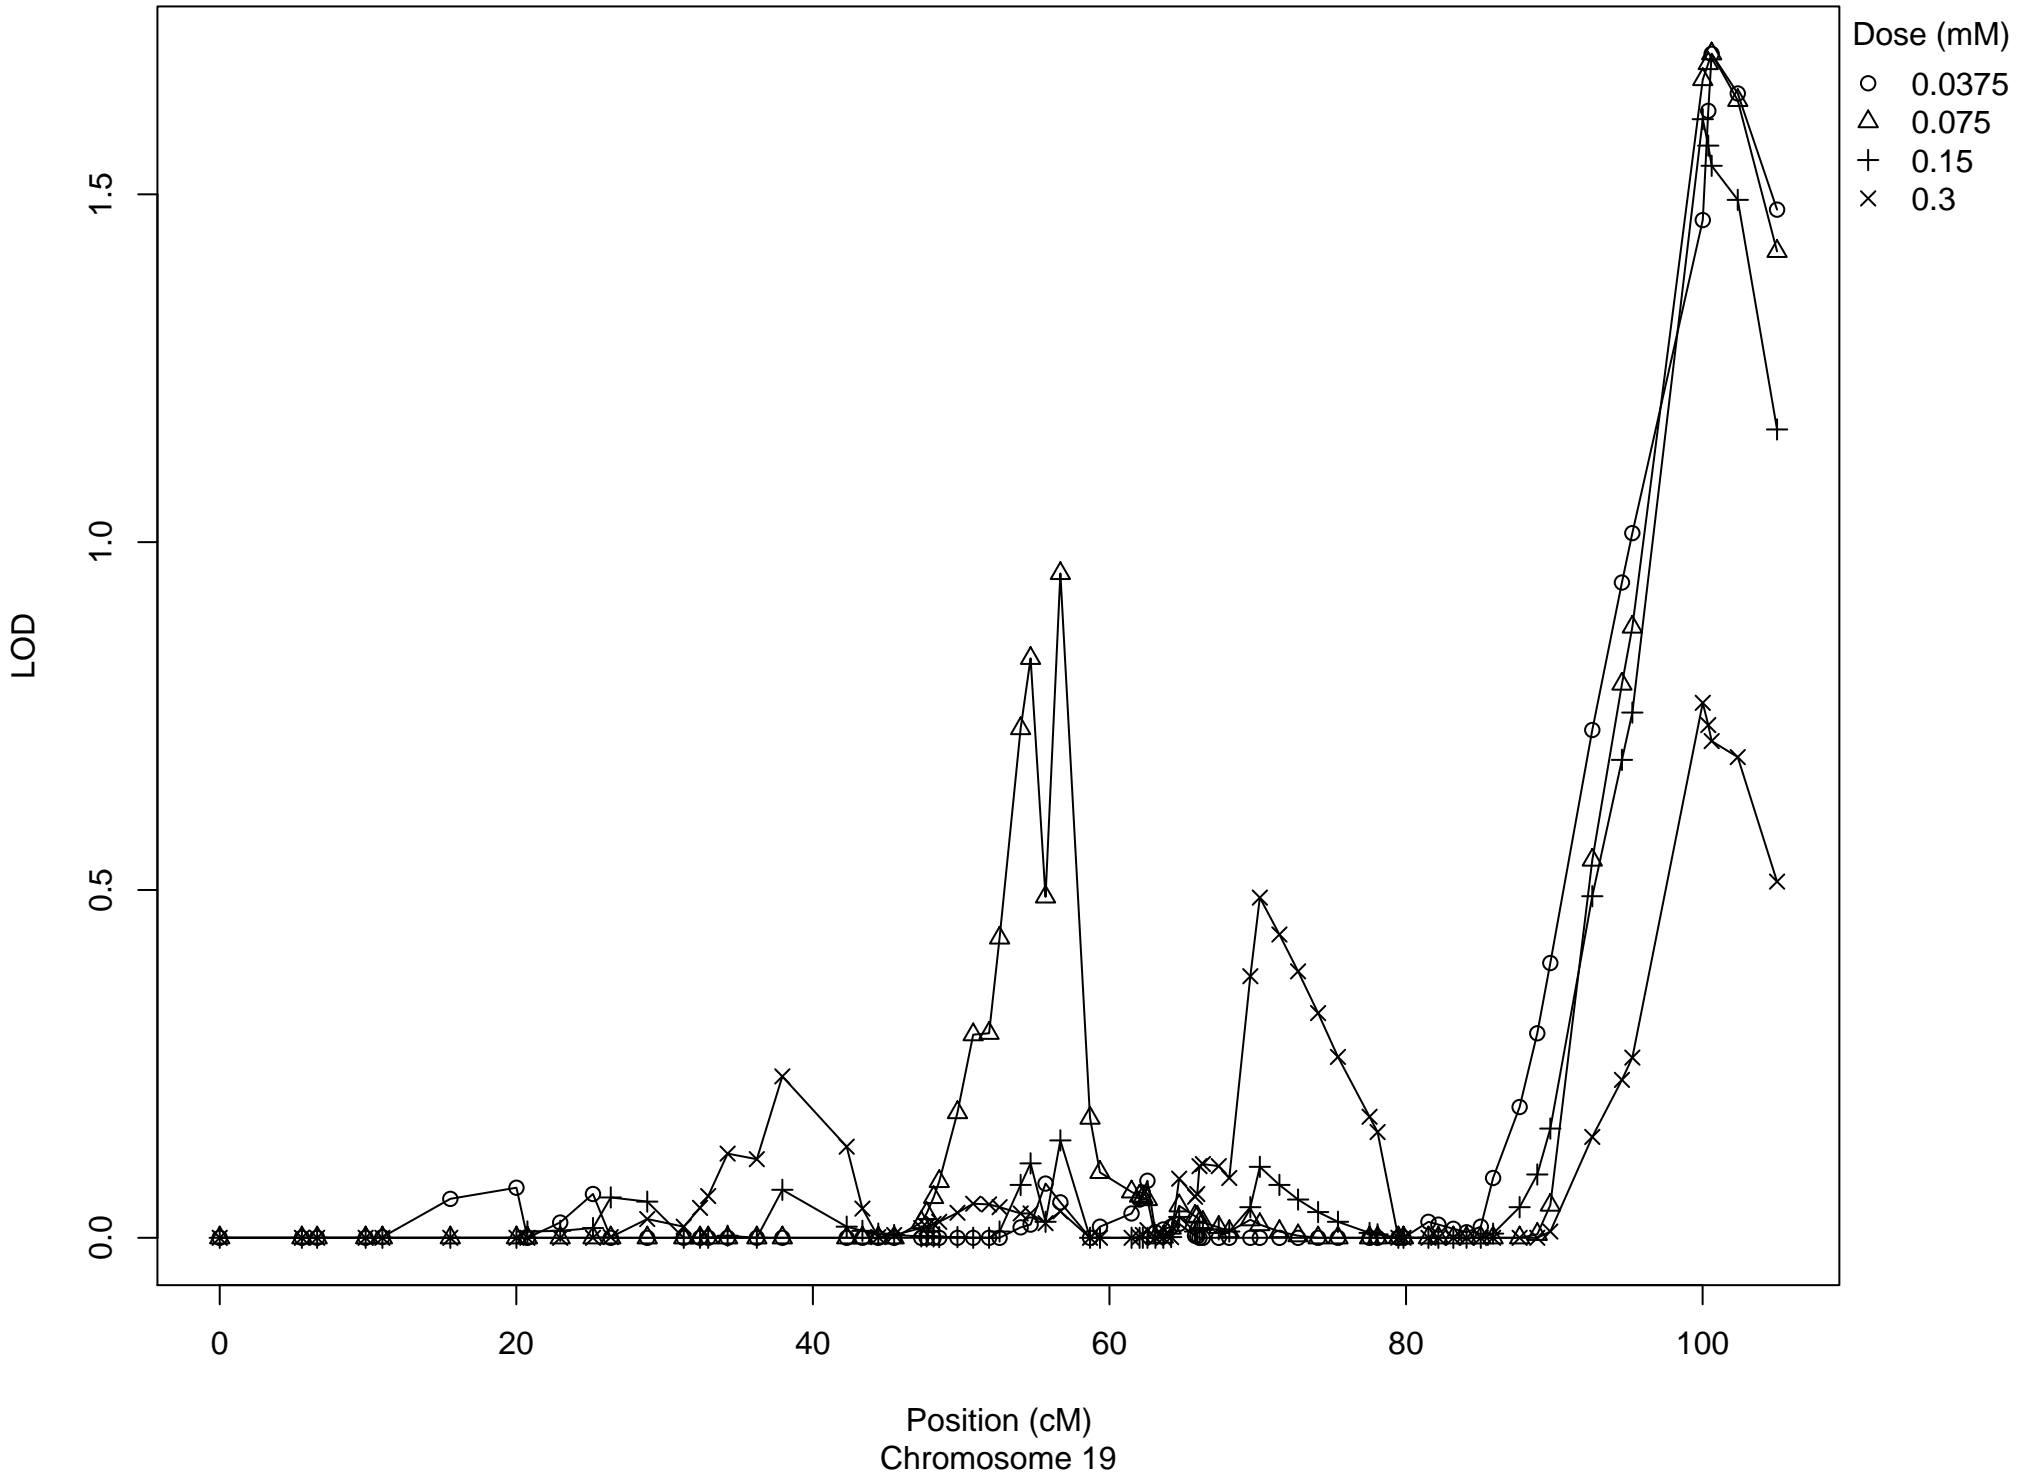

# Hydroxyurea (Hydrox)

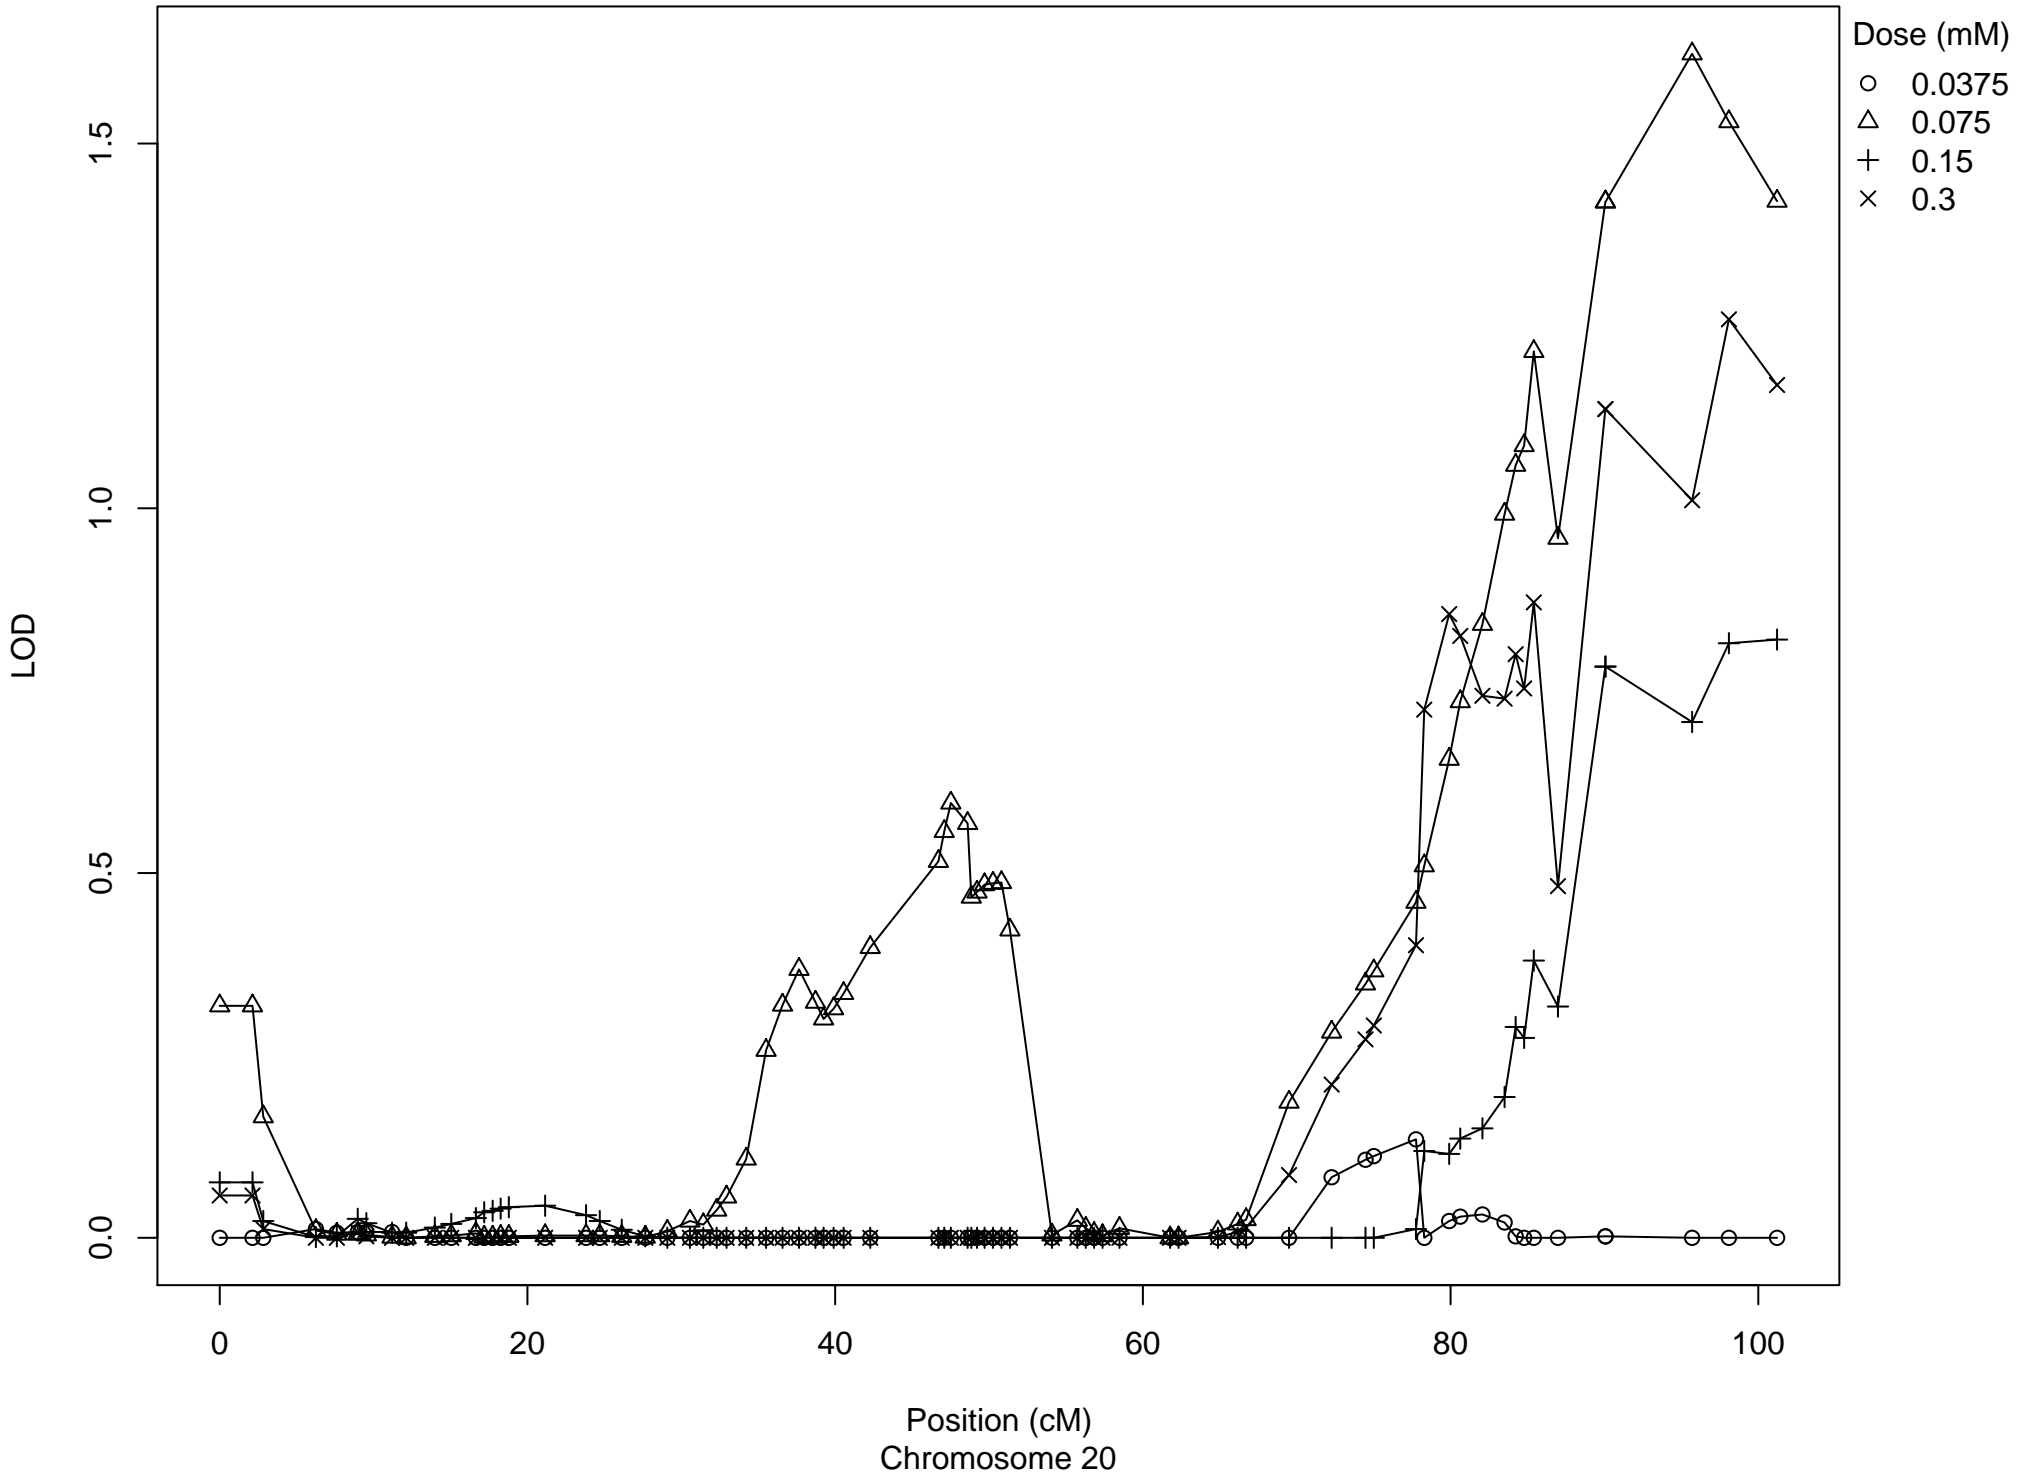

# Hydroxyurea (Hydrox)

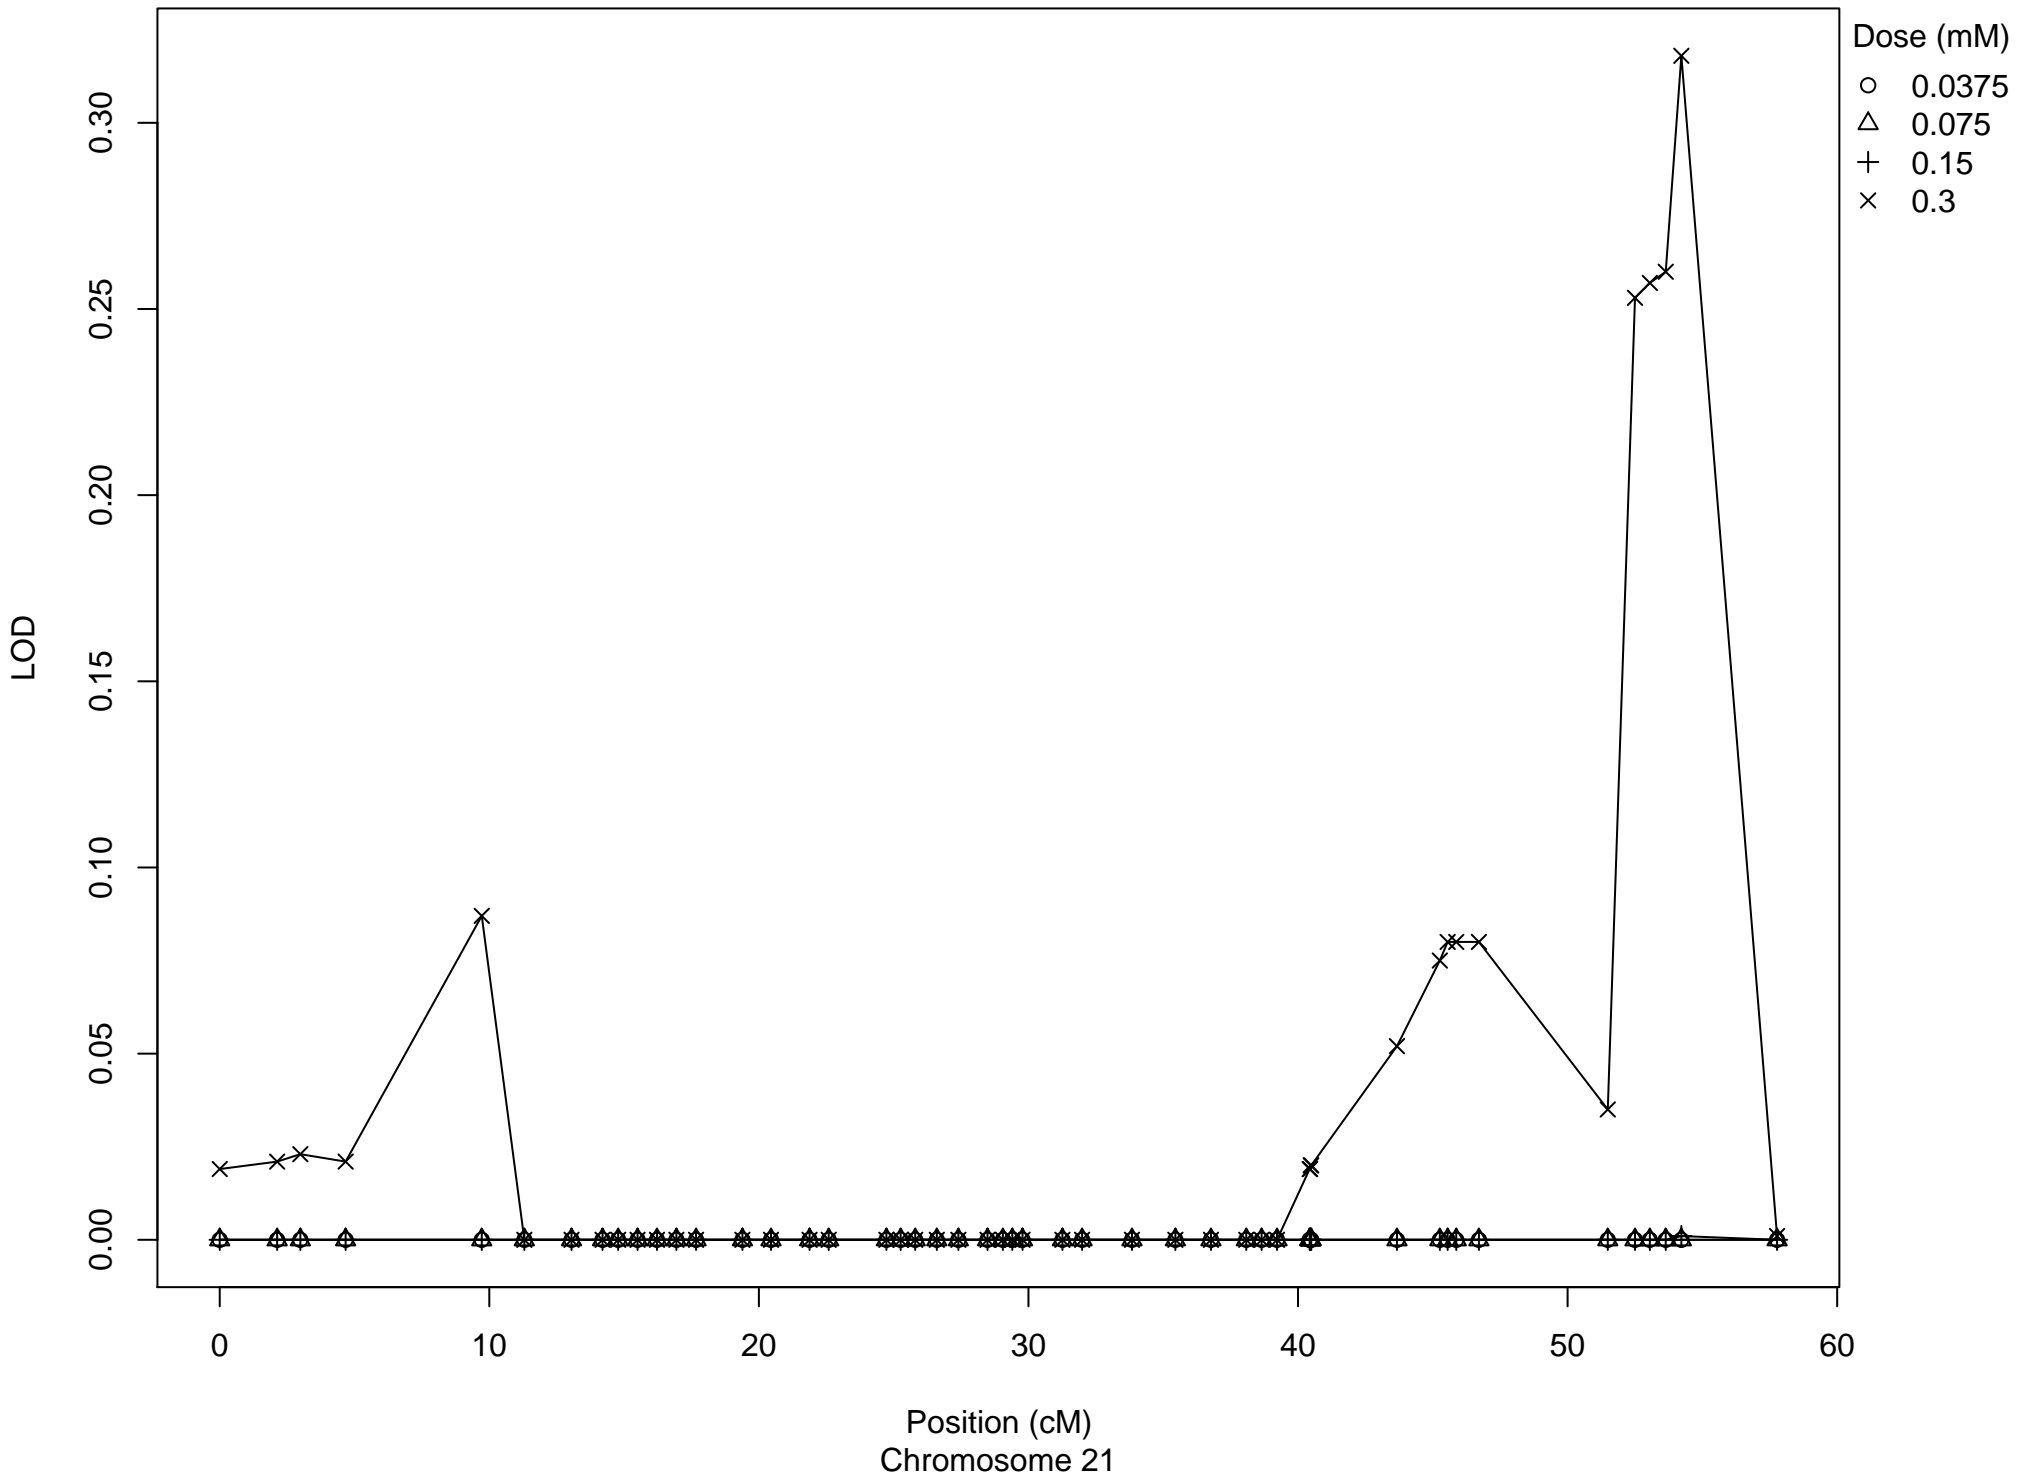

# Hydroxyurea (Hydrox)

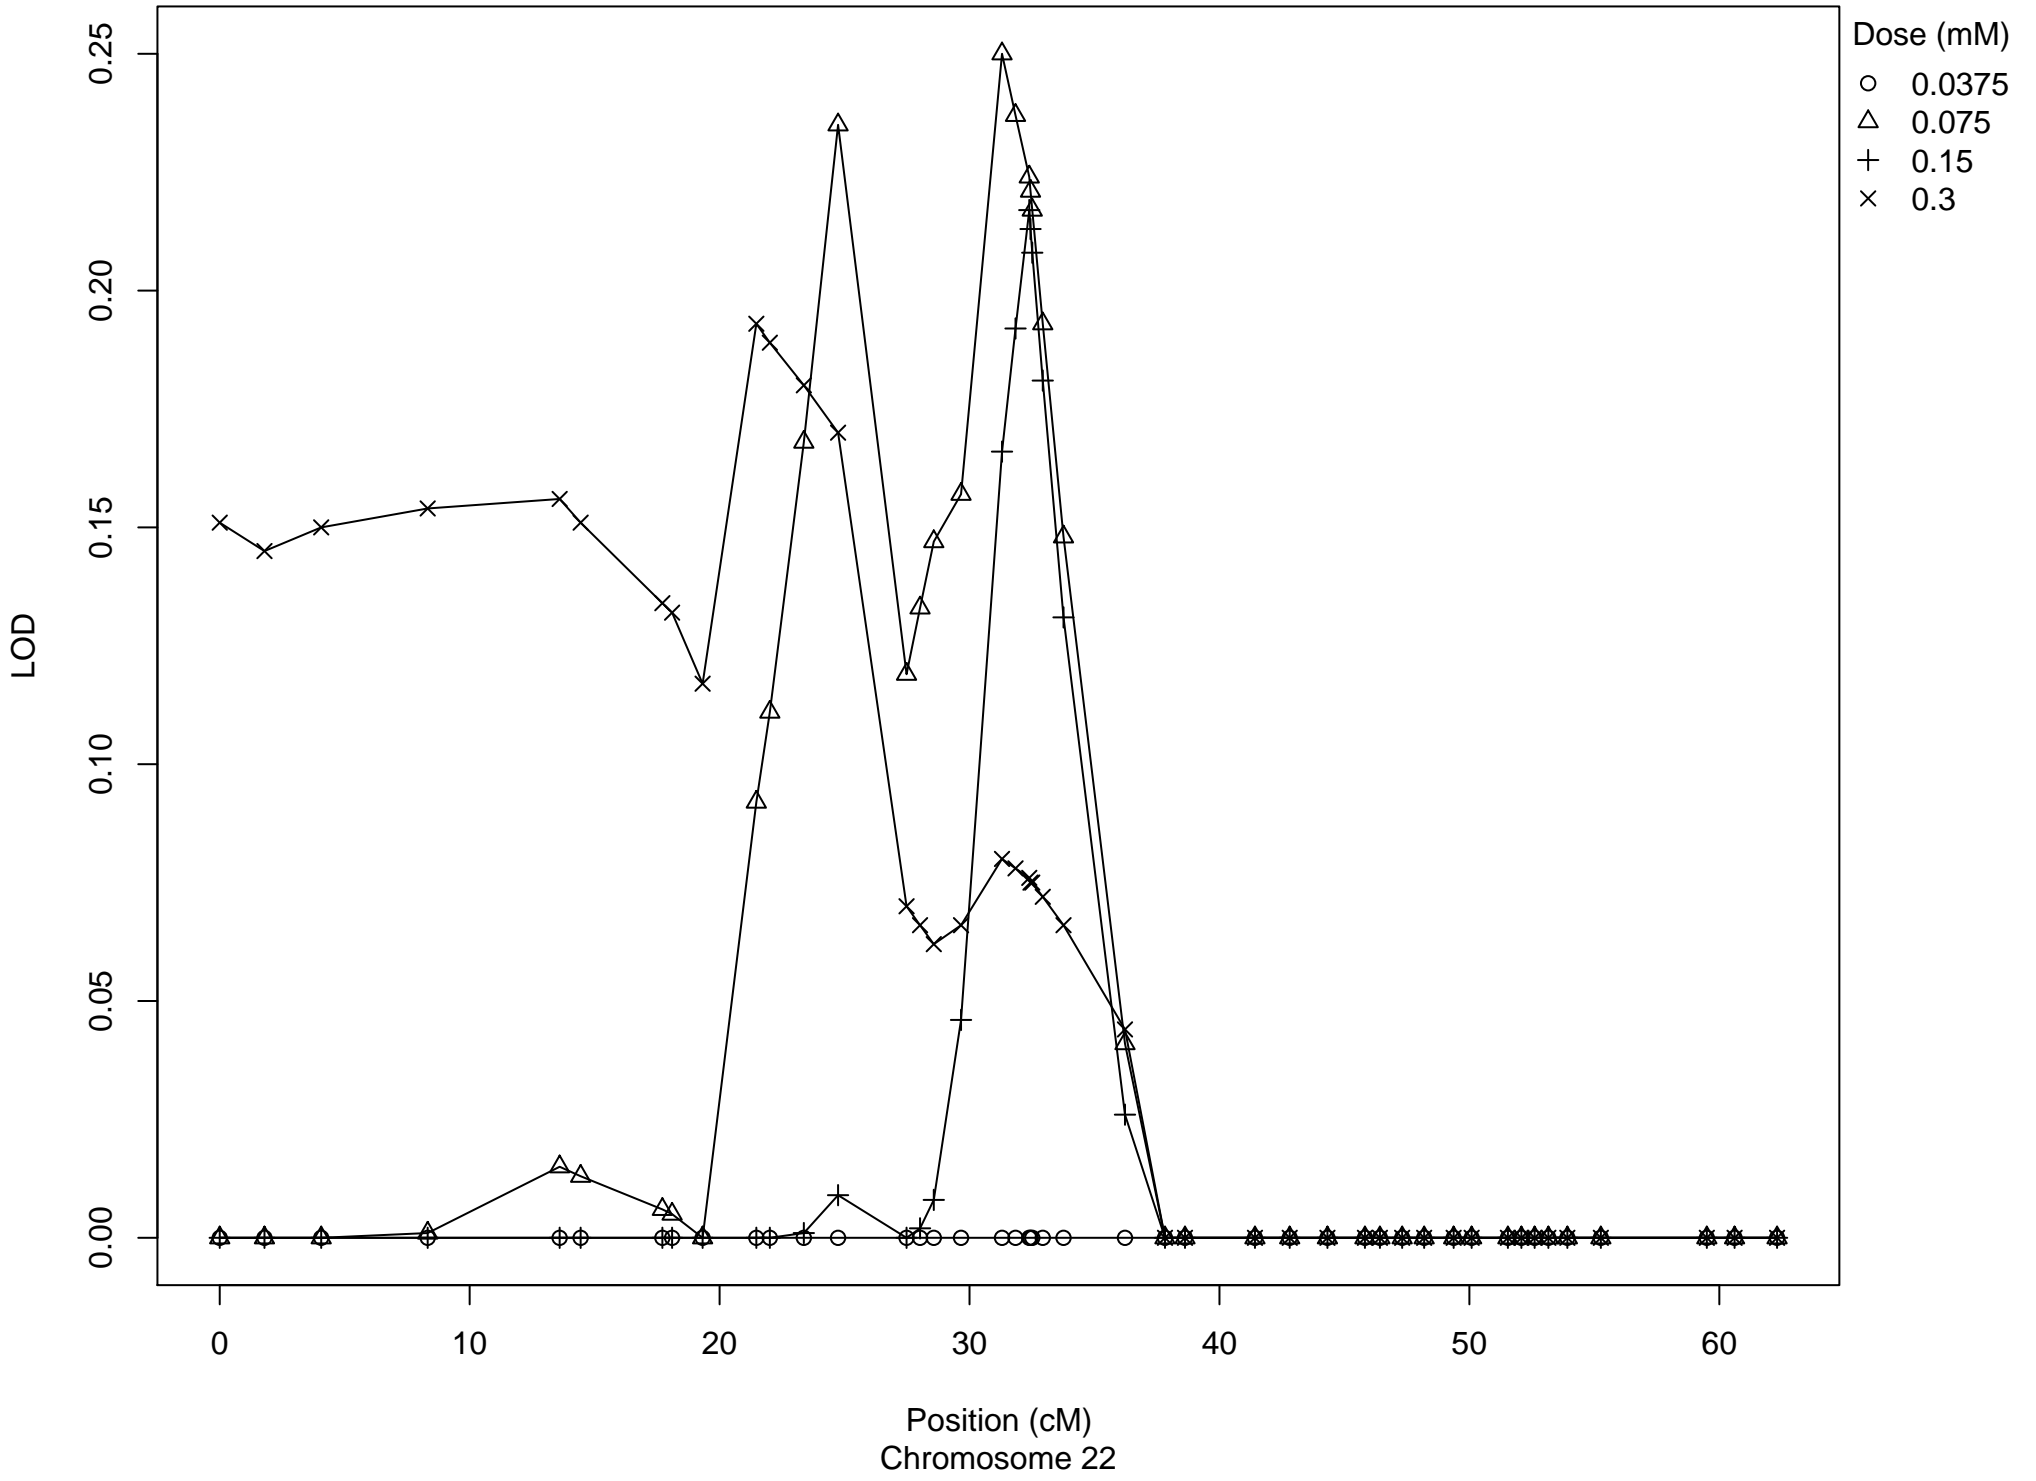

# Idarubicin hydrochloride (Ida)

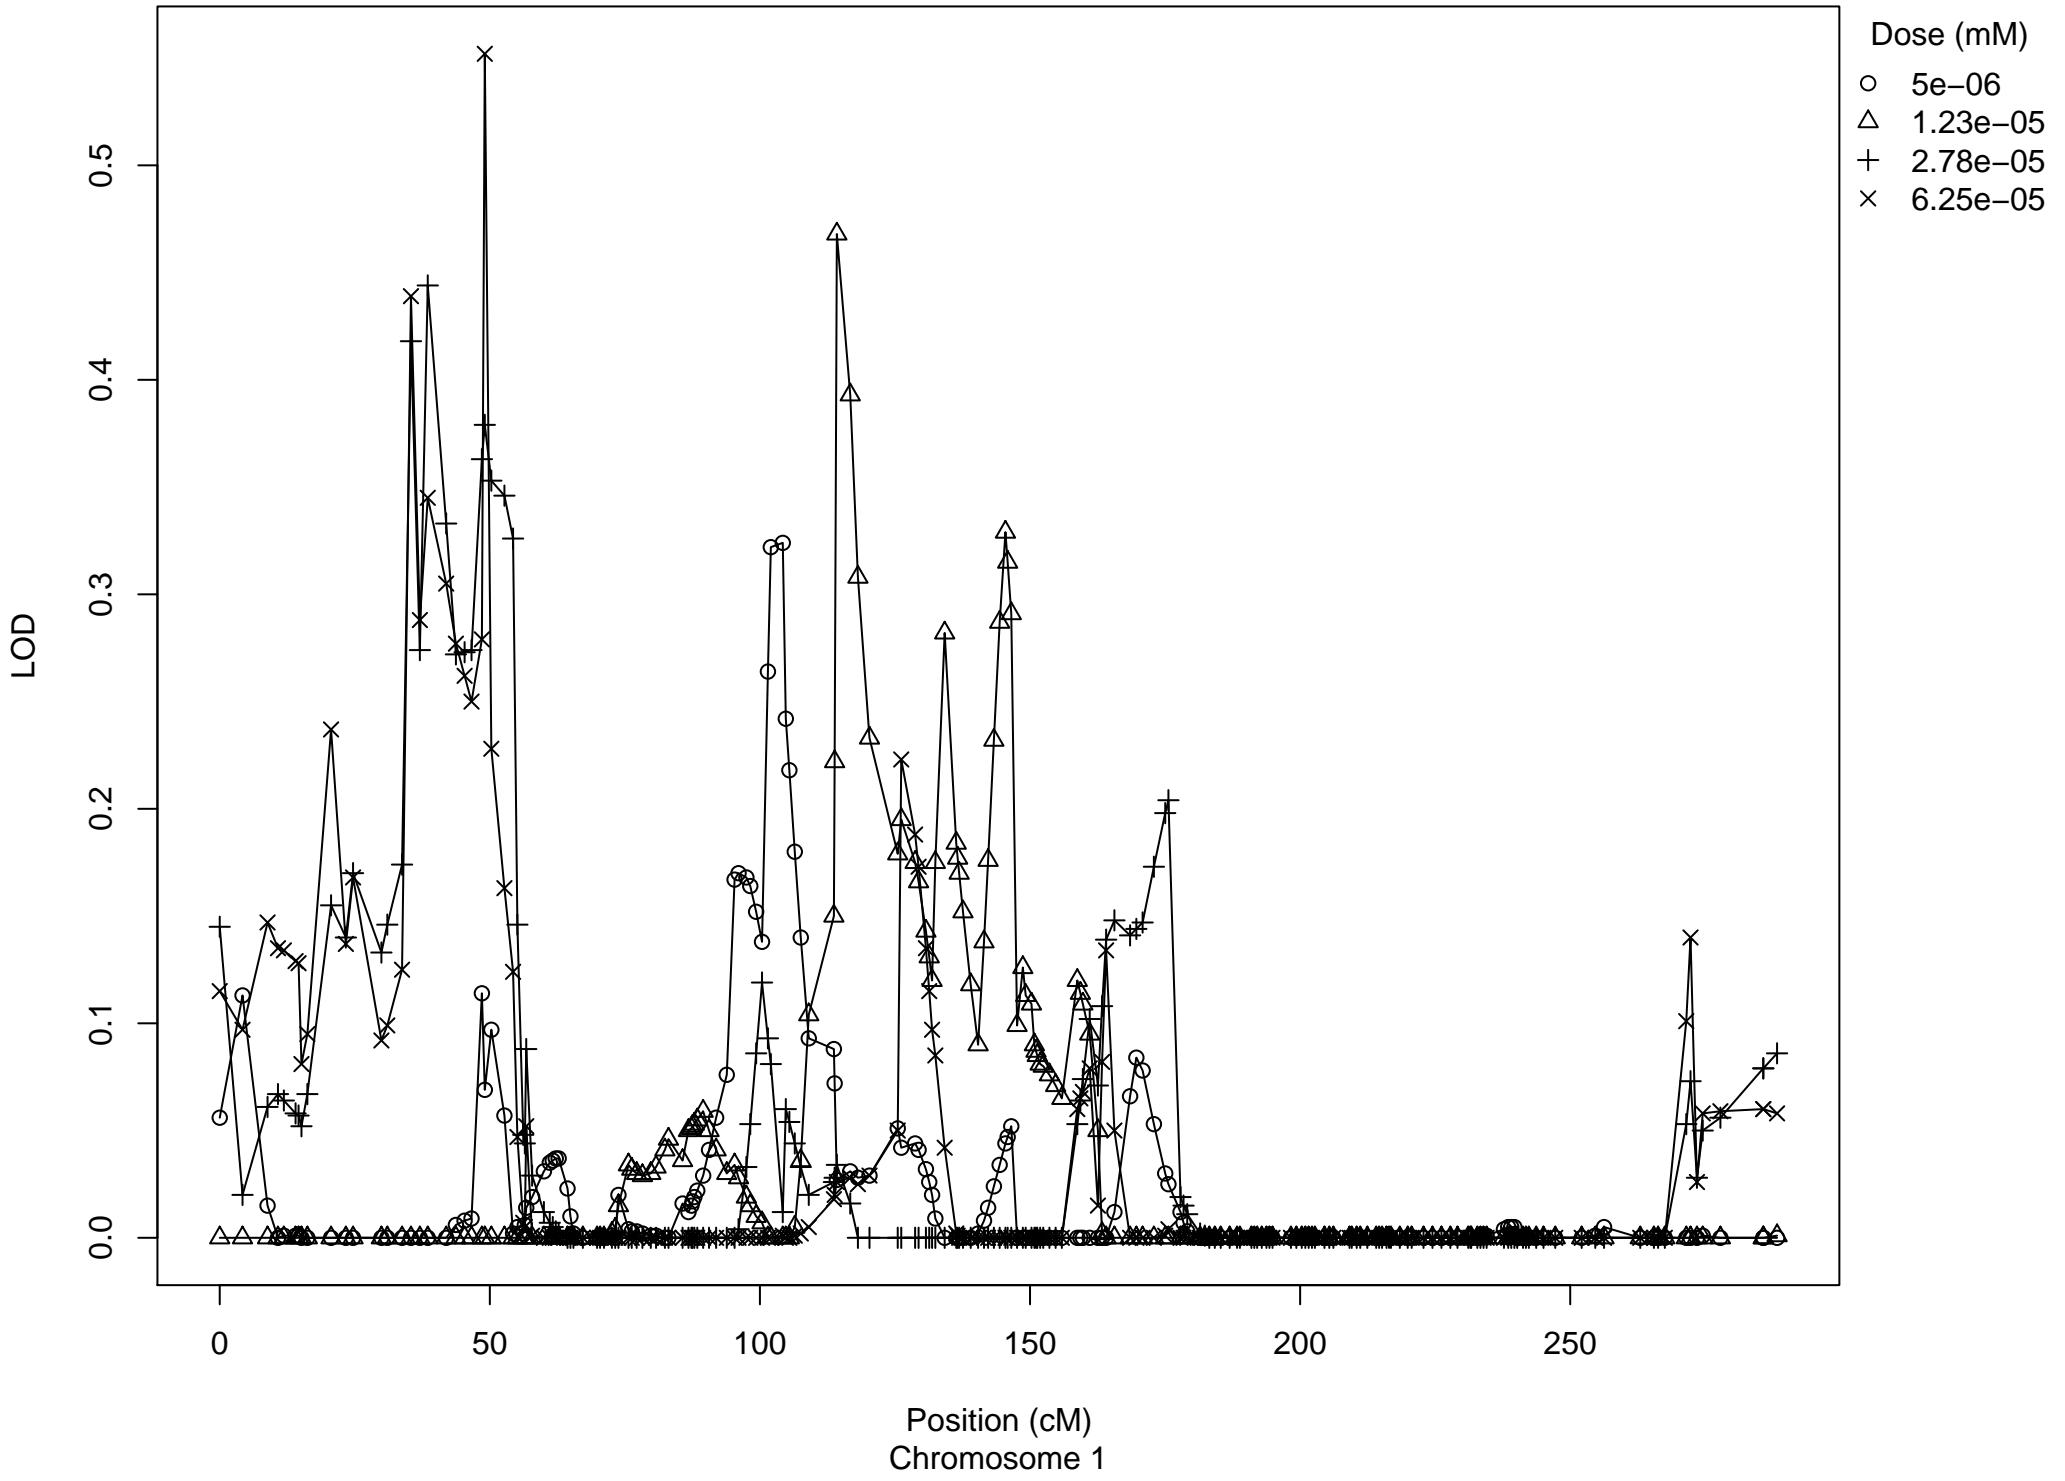

# Idarubicin hydrochloride (Ida)

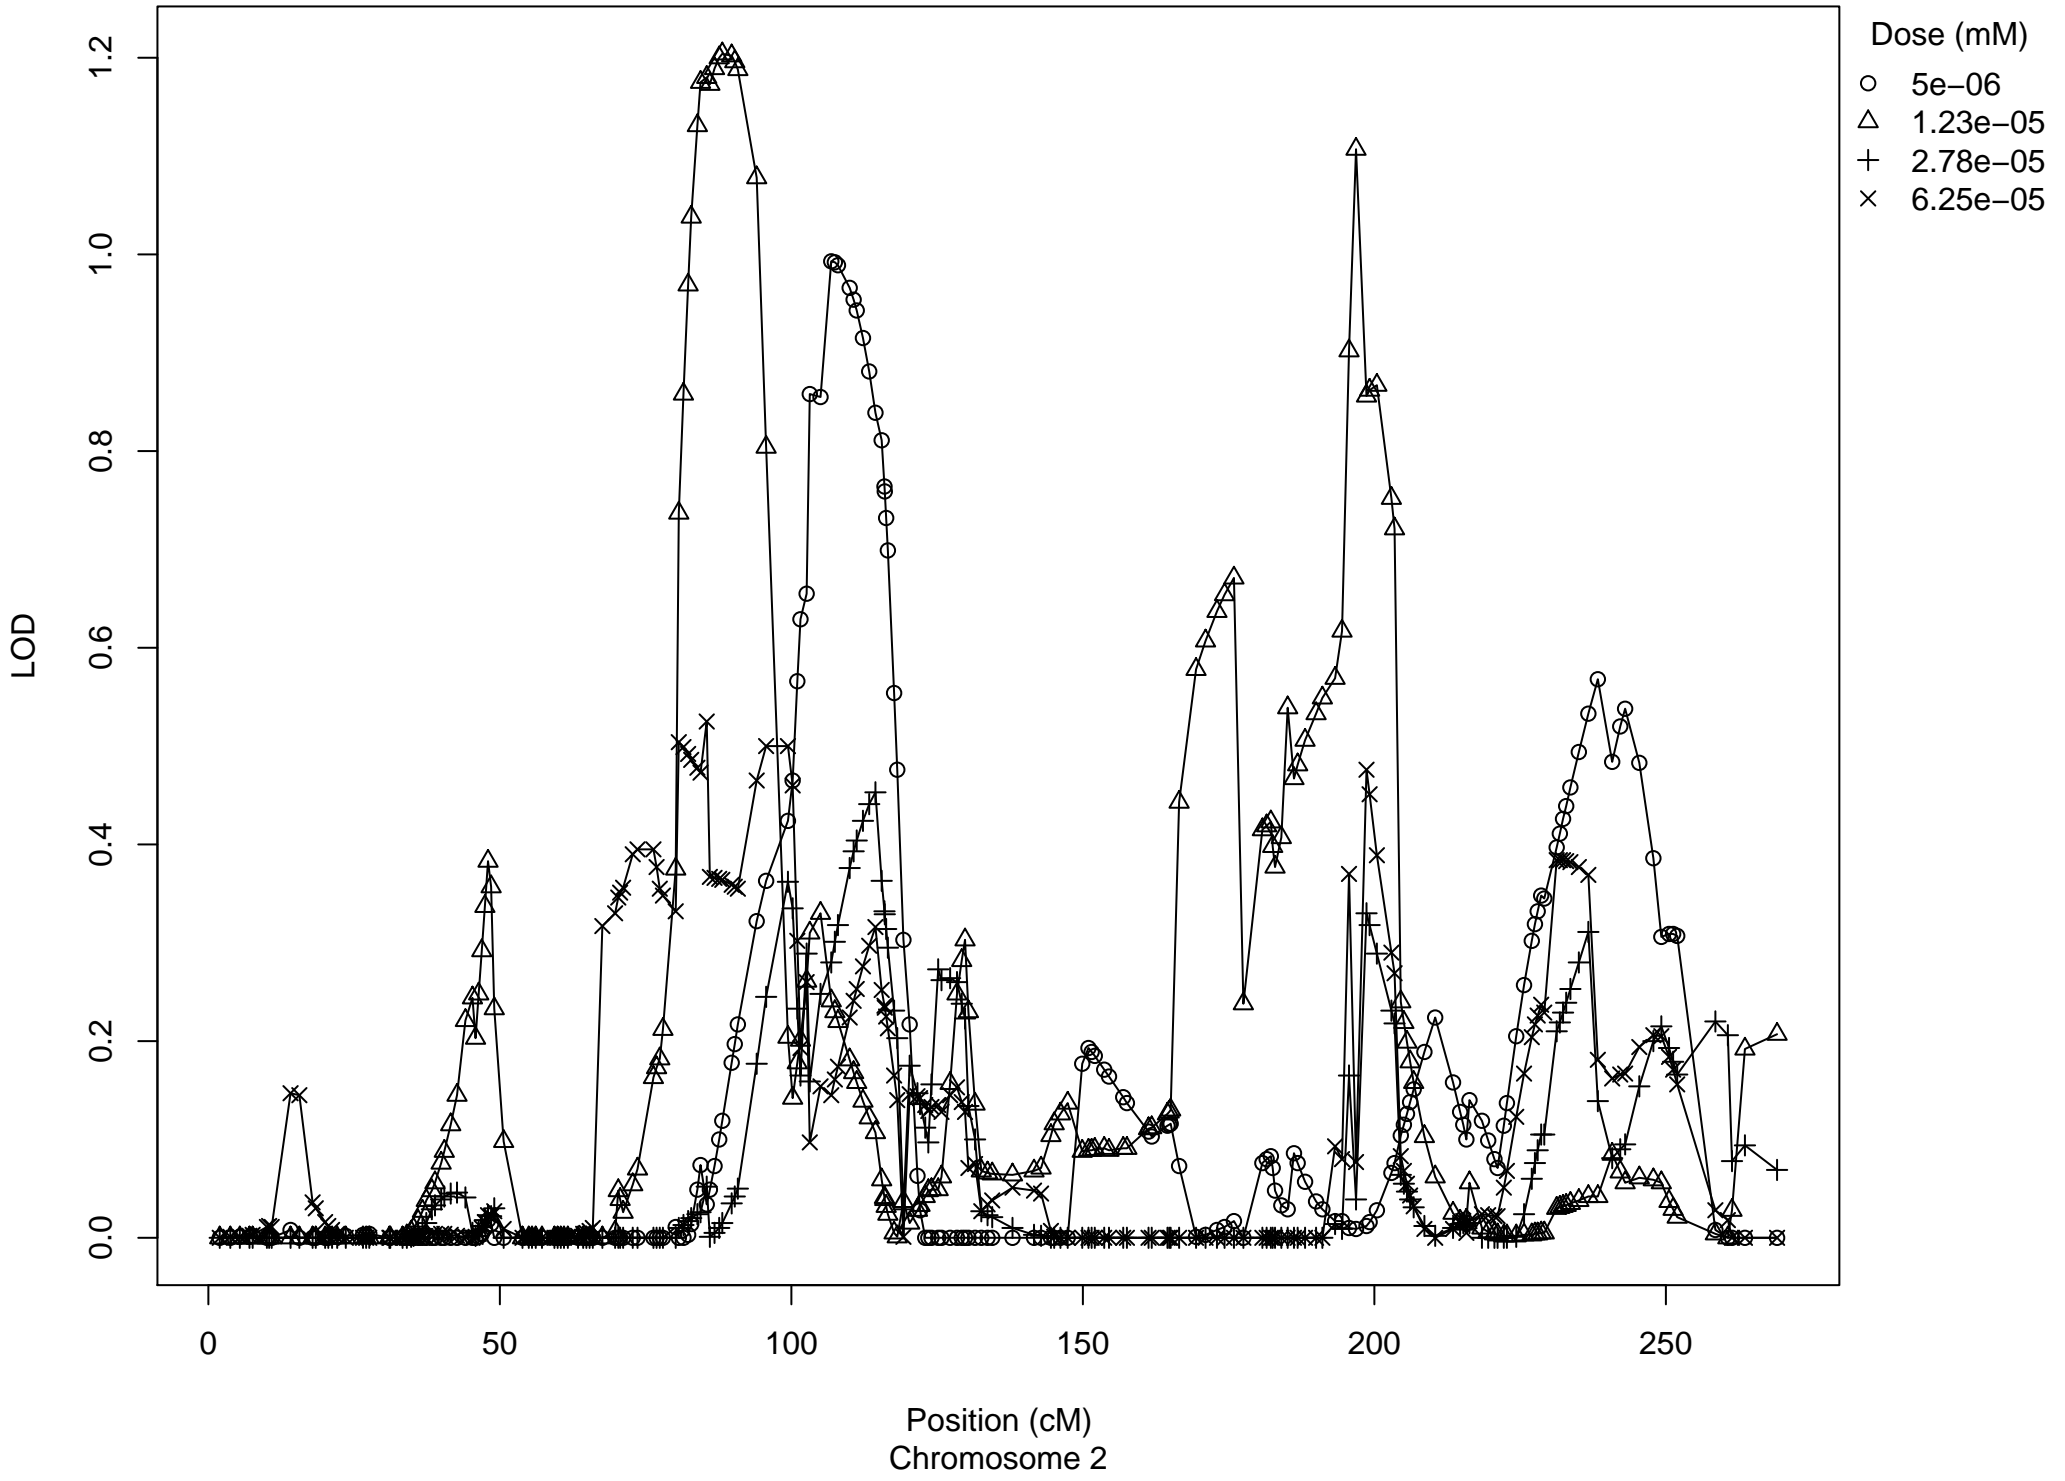



# Idarubicin hydrochloride (Ida)

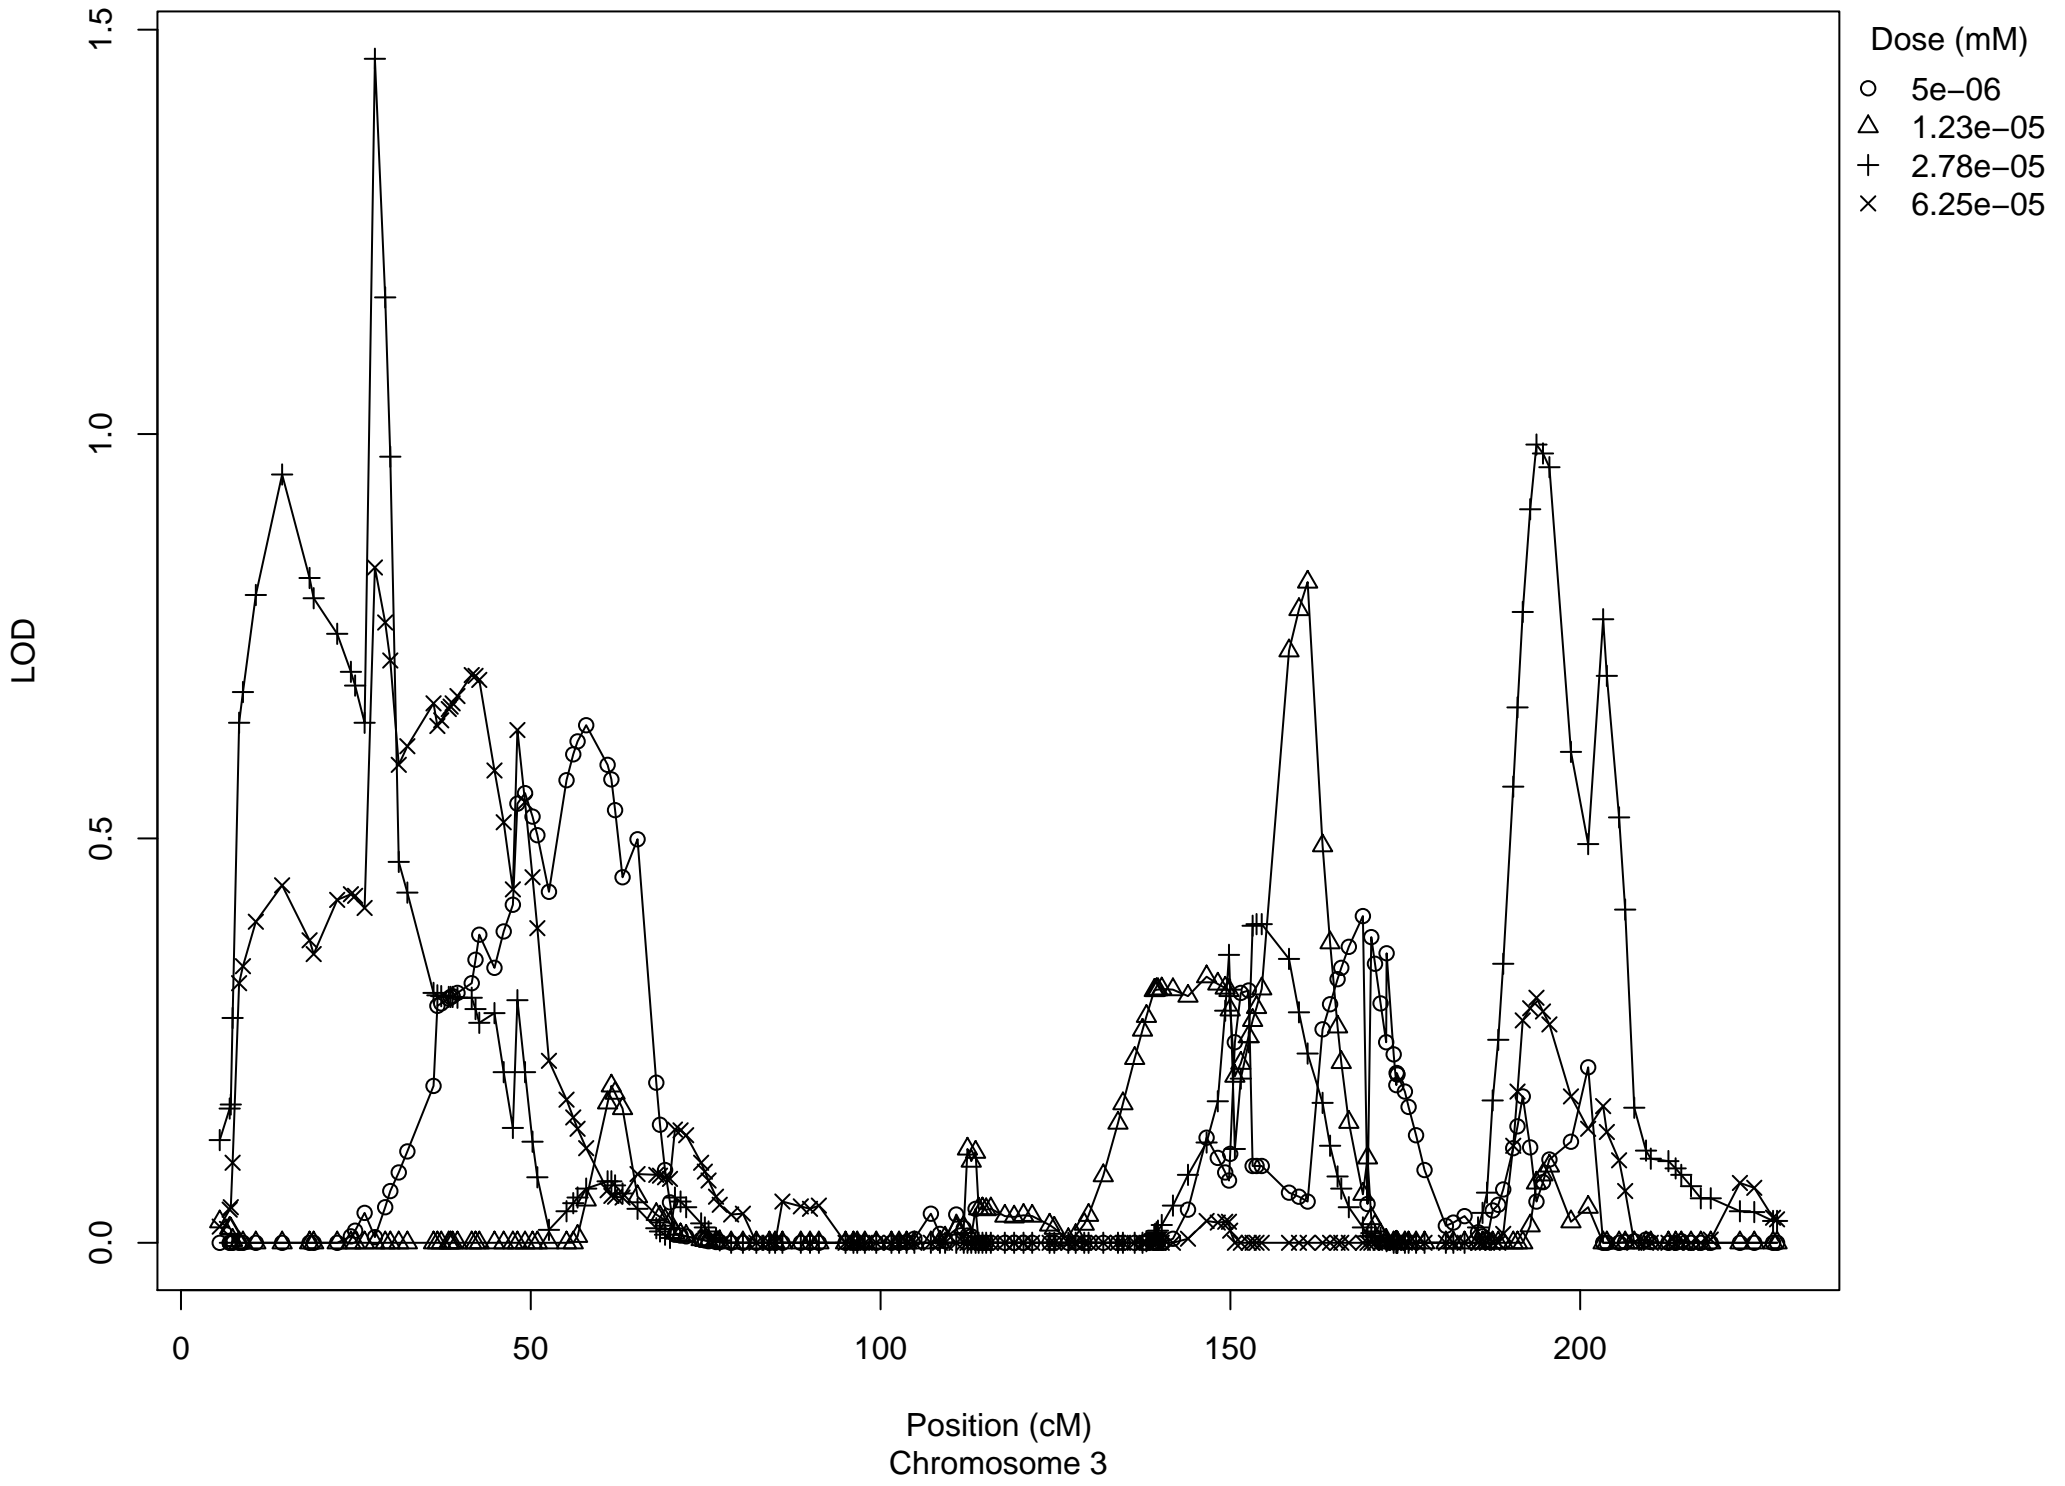

# Idarubicin hydrochloride (Ida)

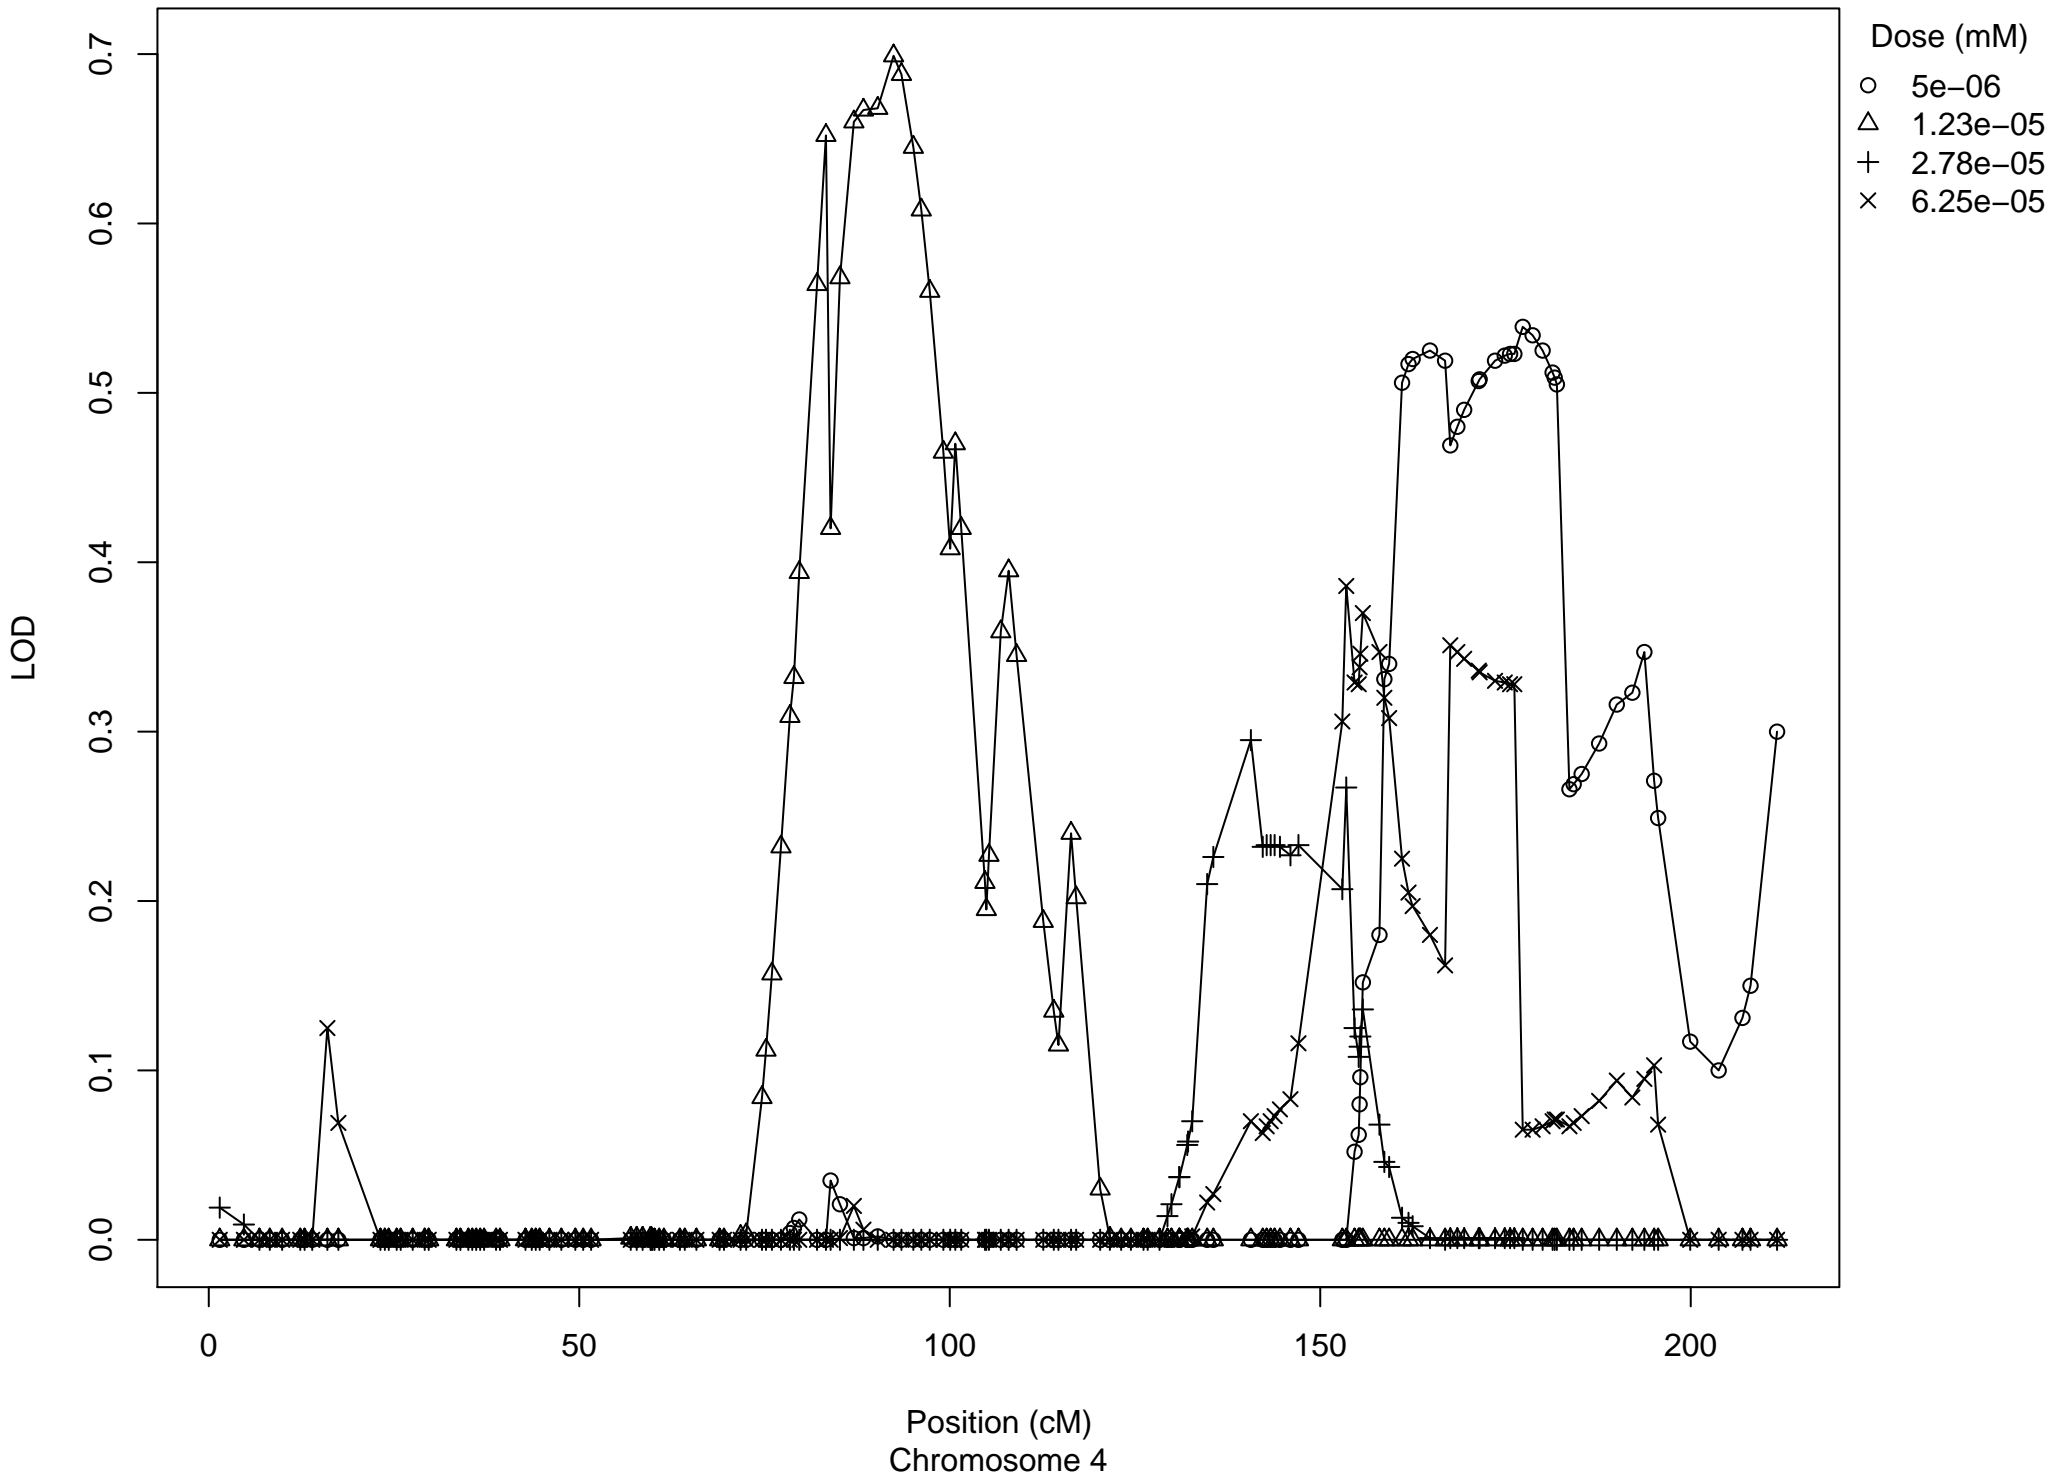

# Idarubicin hydrochloride (Ida)

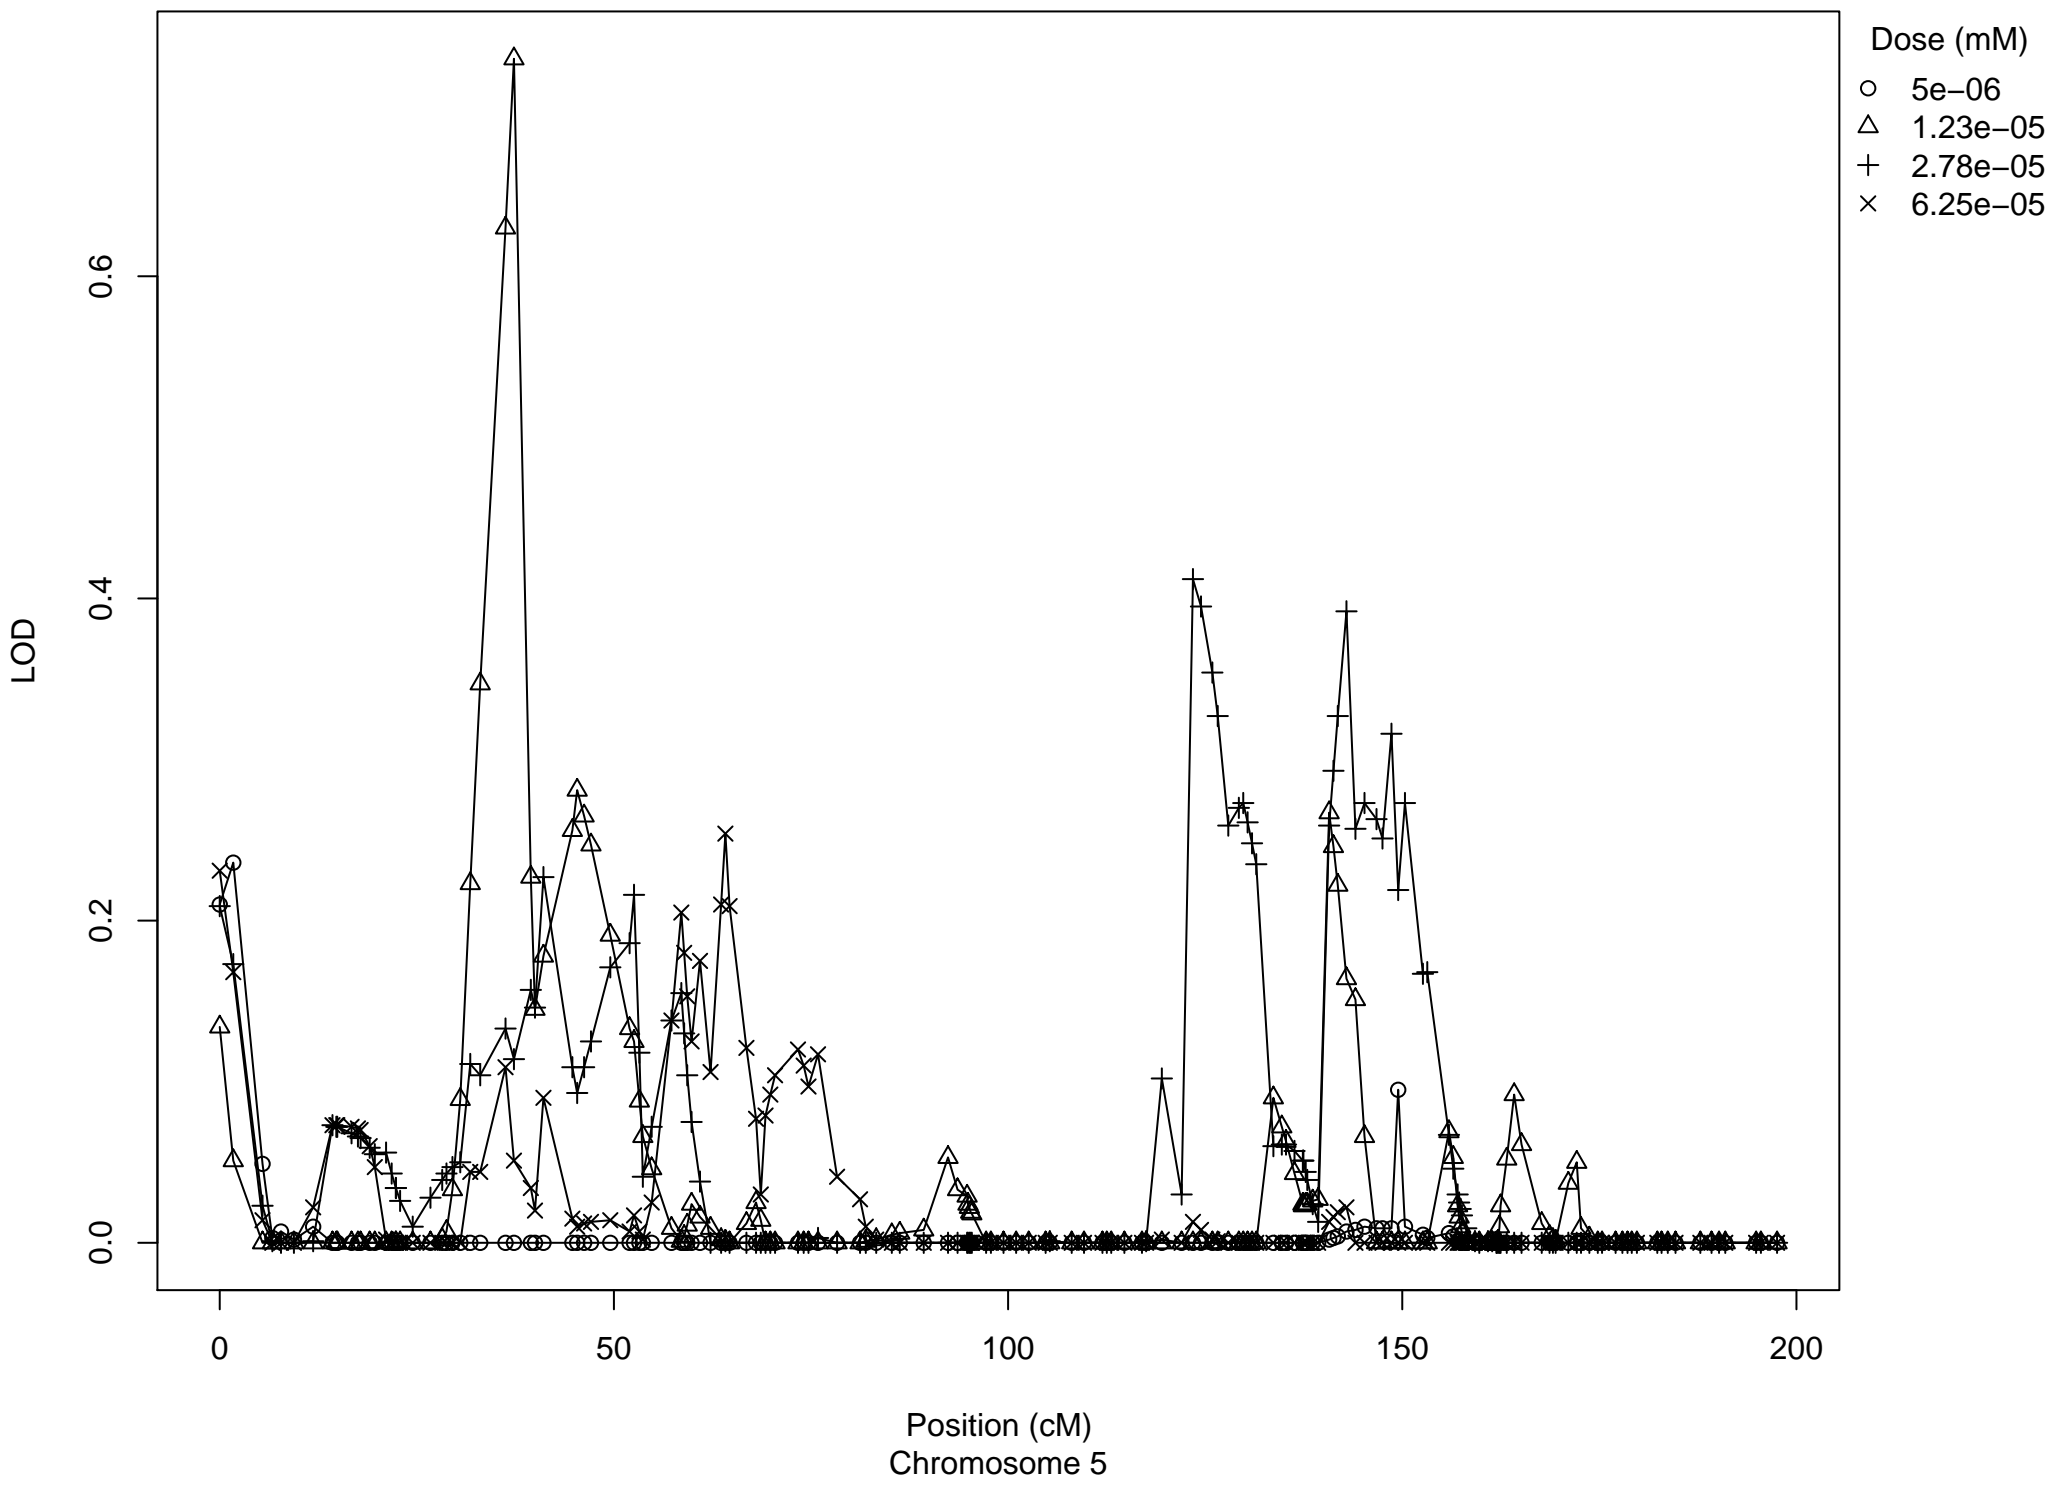

# Idarubicin hydrochloride (Ida)

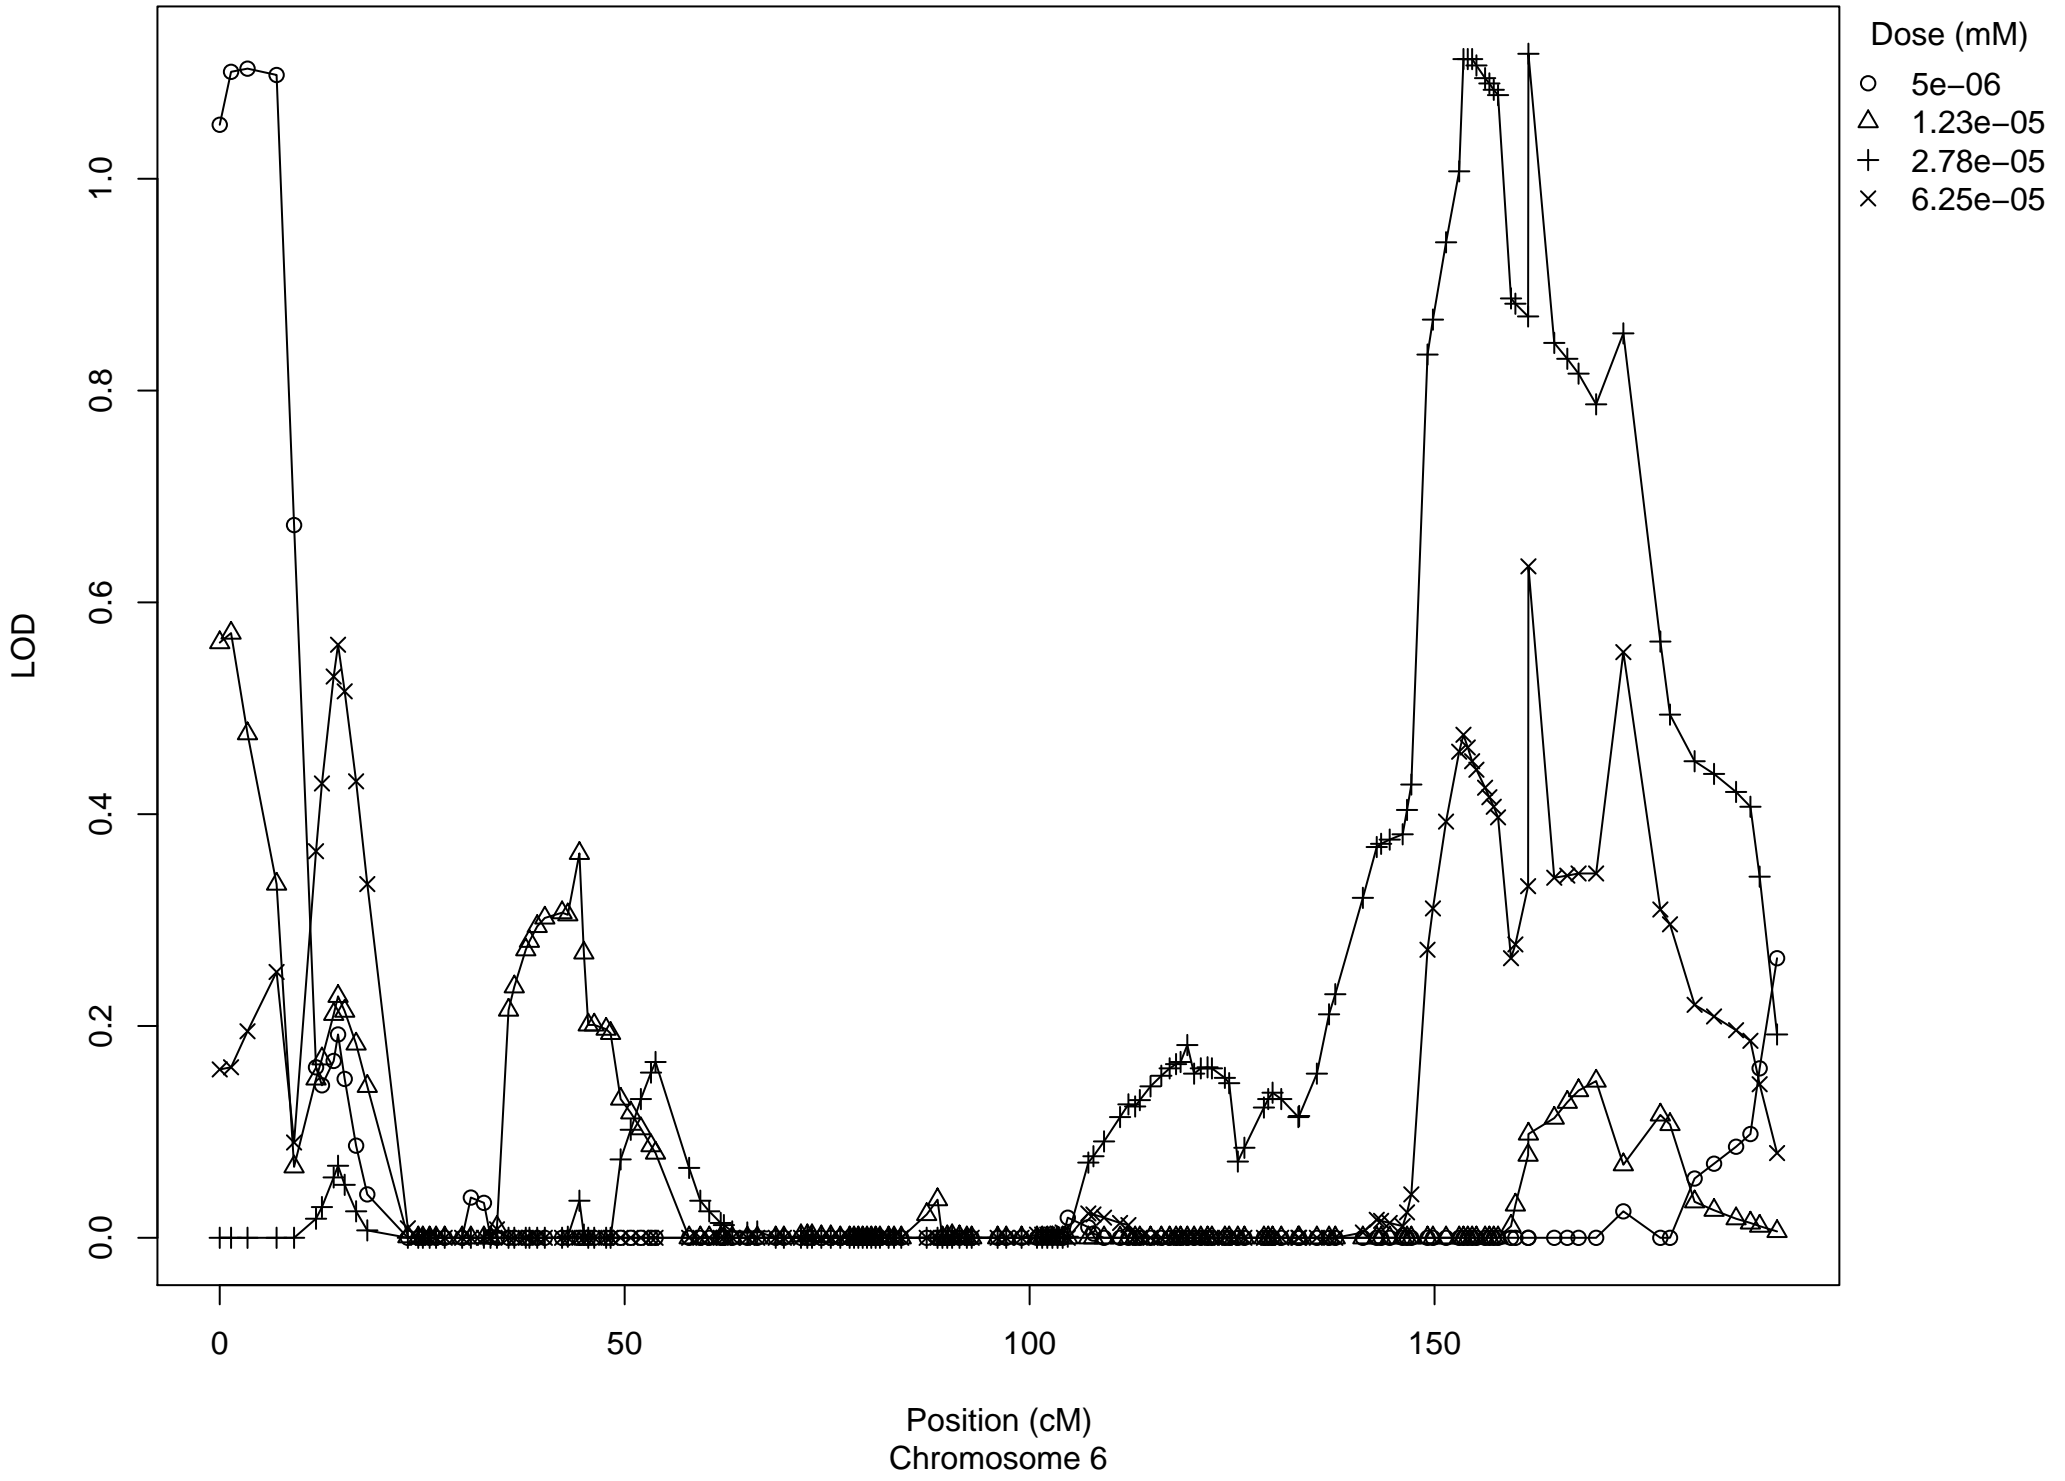

# Idarubicin hydrochloride (Ida)

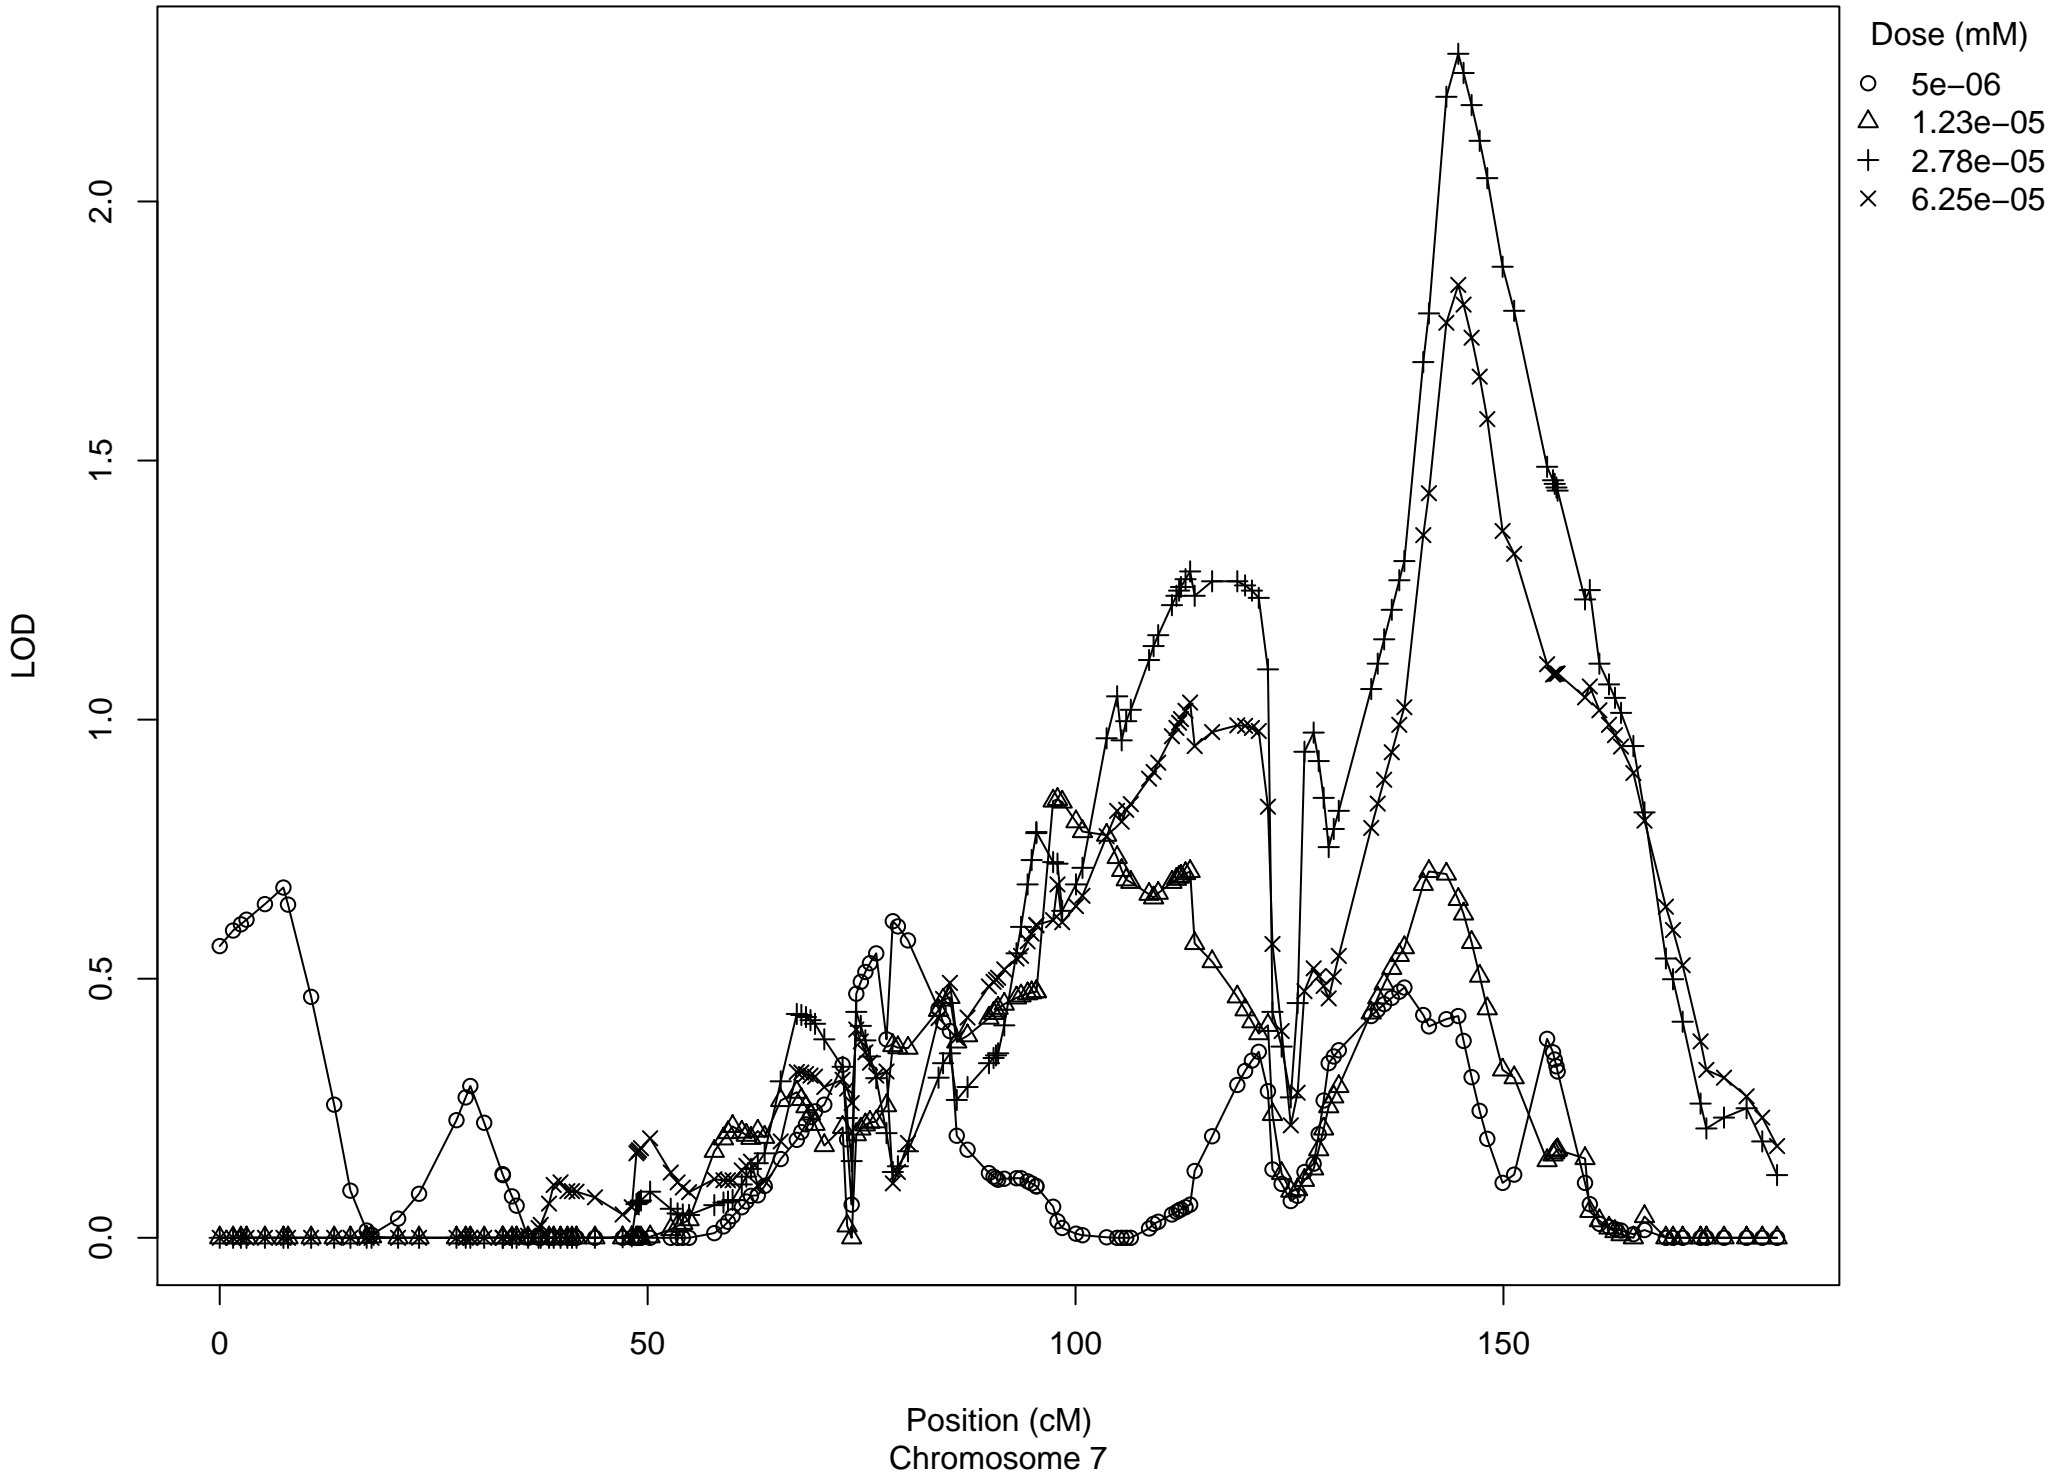

# Idarubicin hydrochloride (Ida)

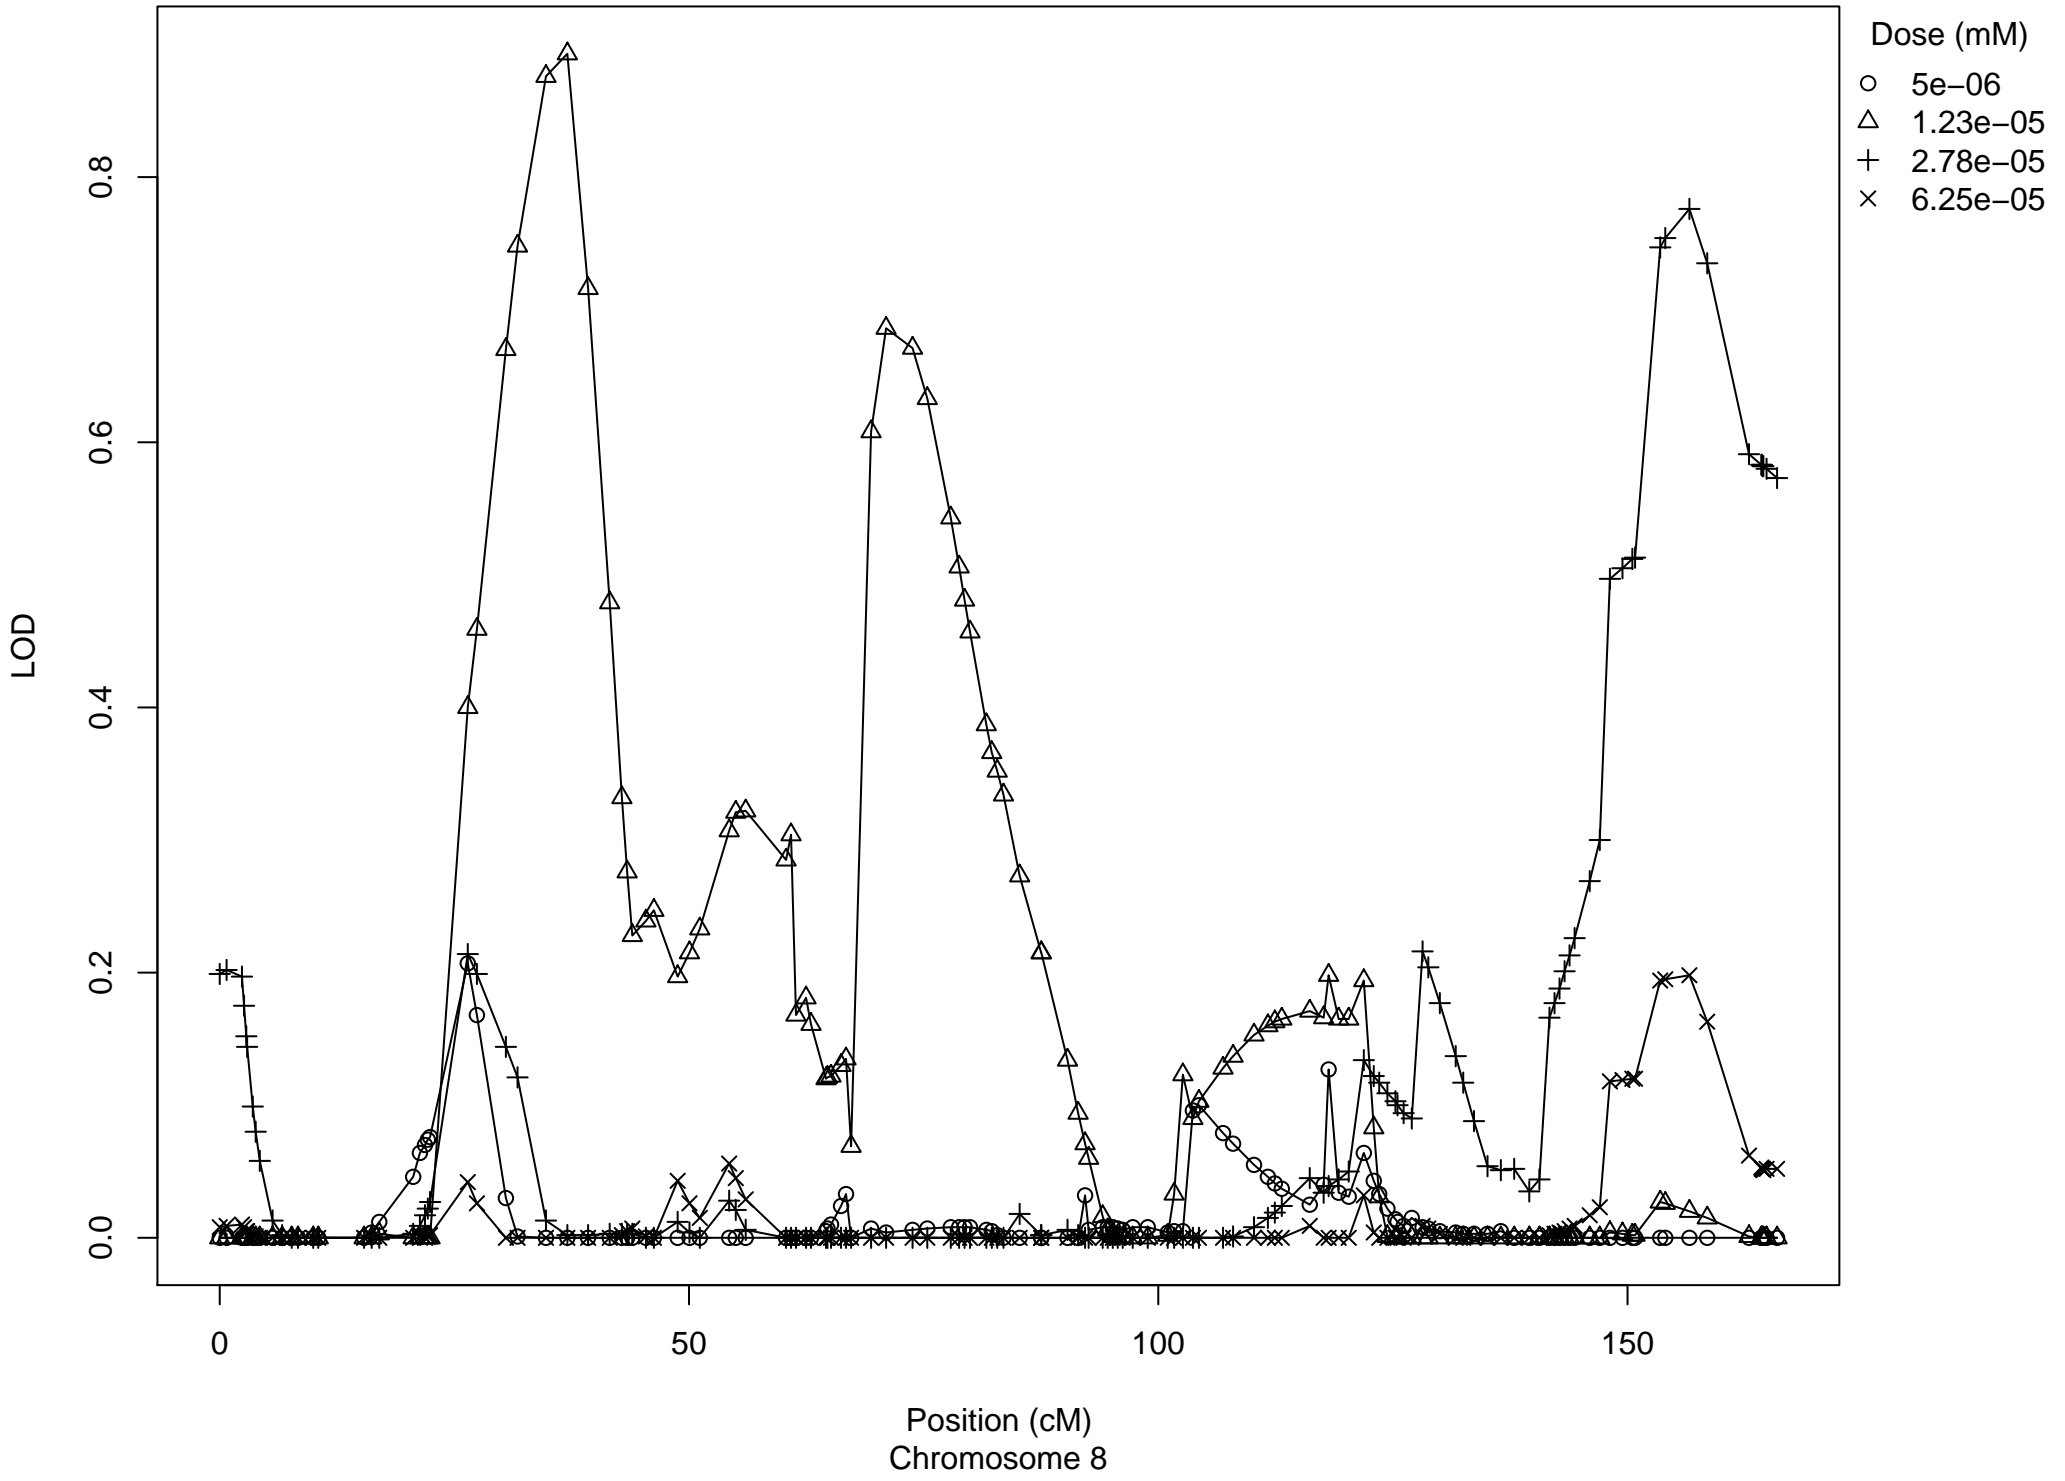

# Idarubicin hydrochloride (Ida)

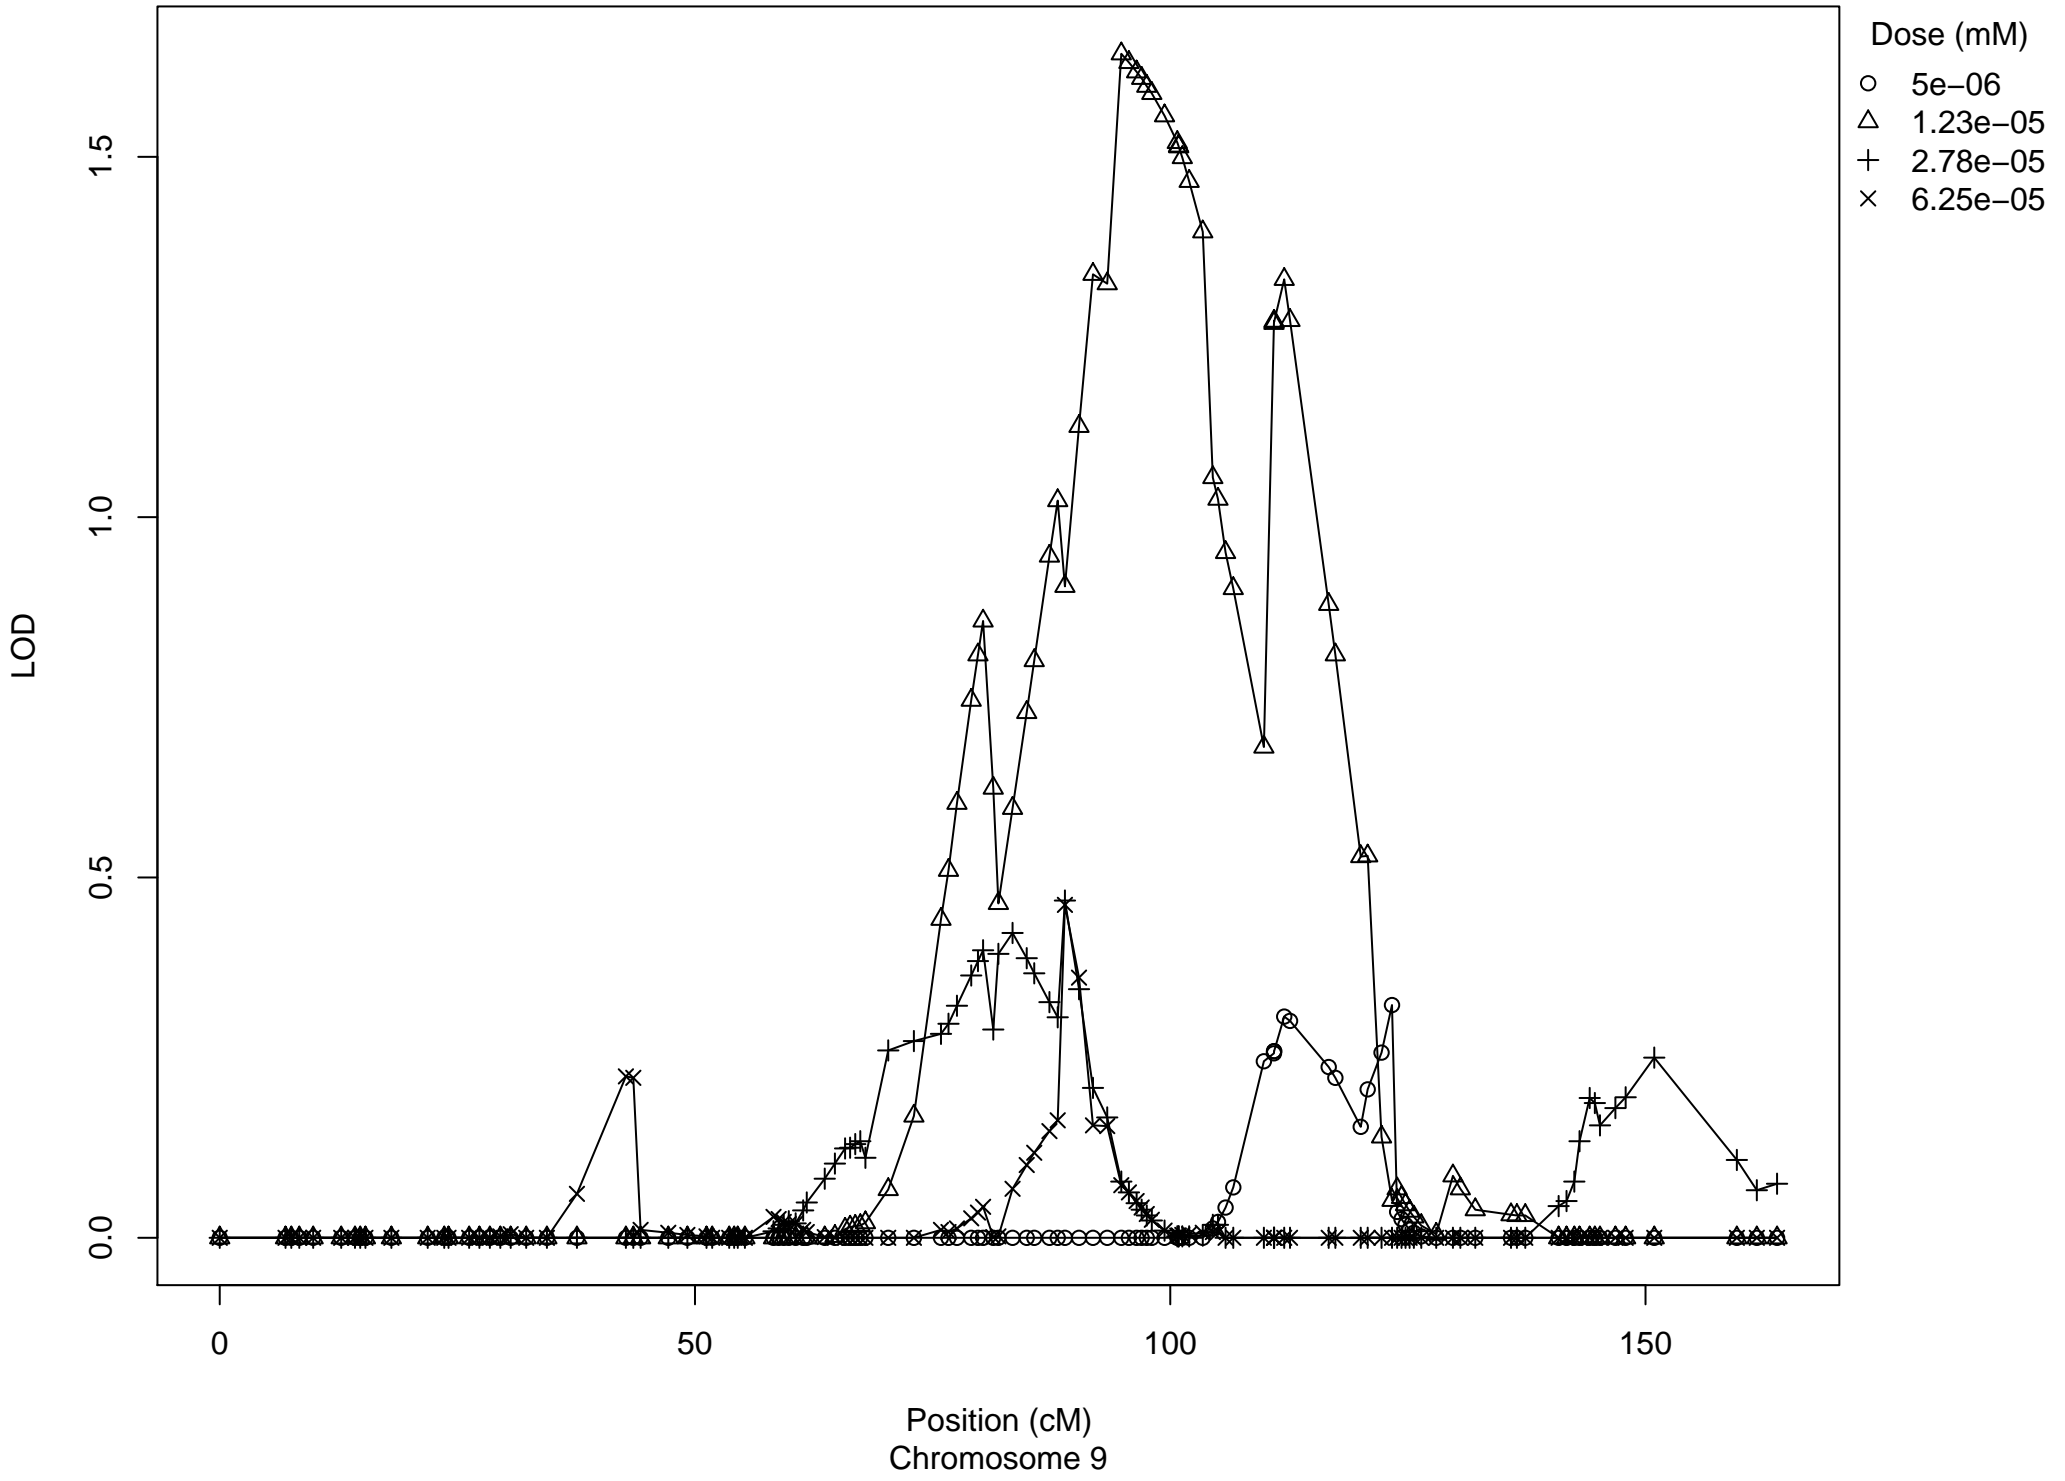

# Idarubicin hydrochloride (Ida)

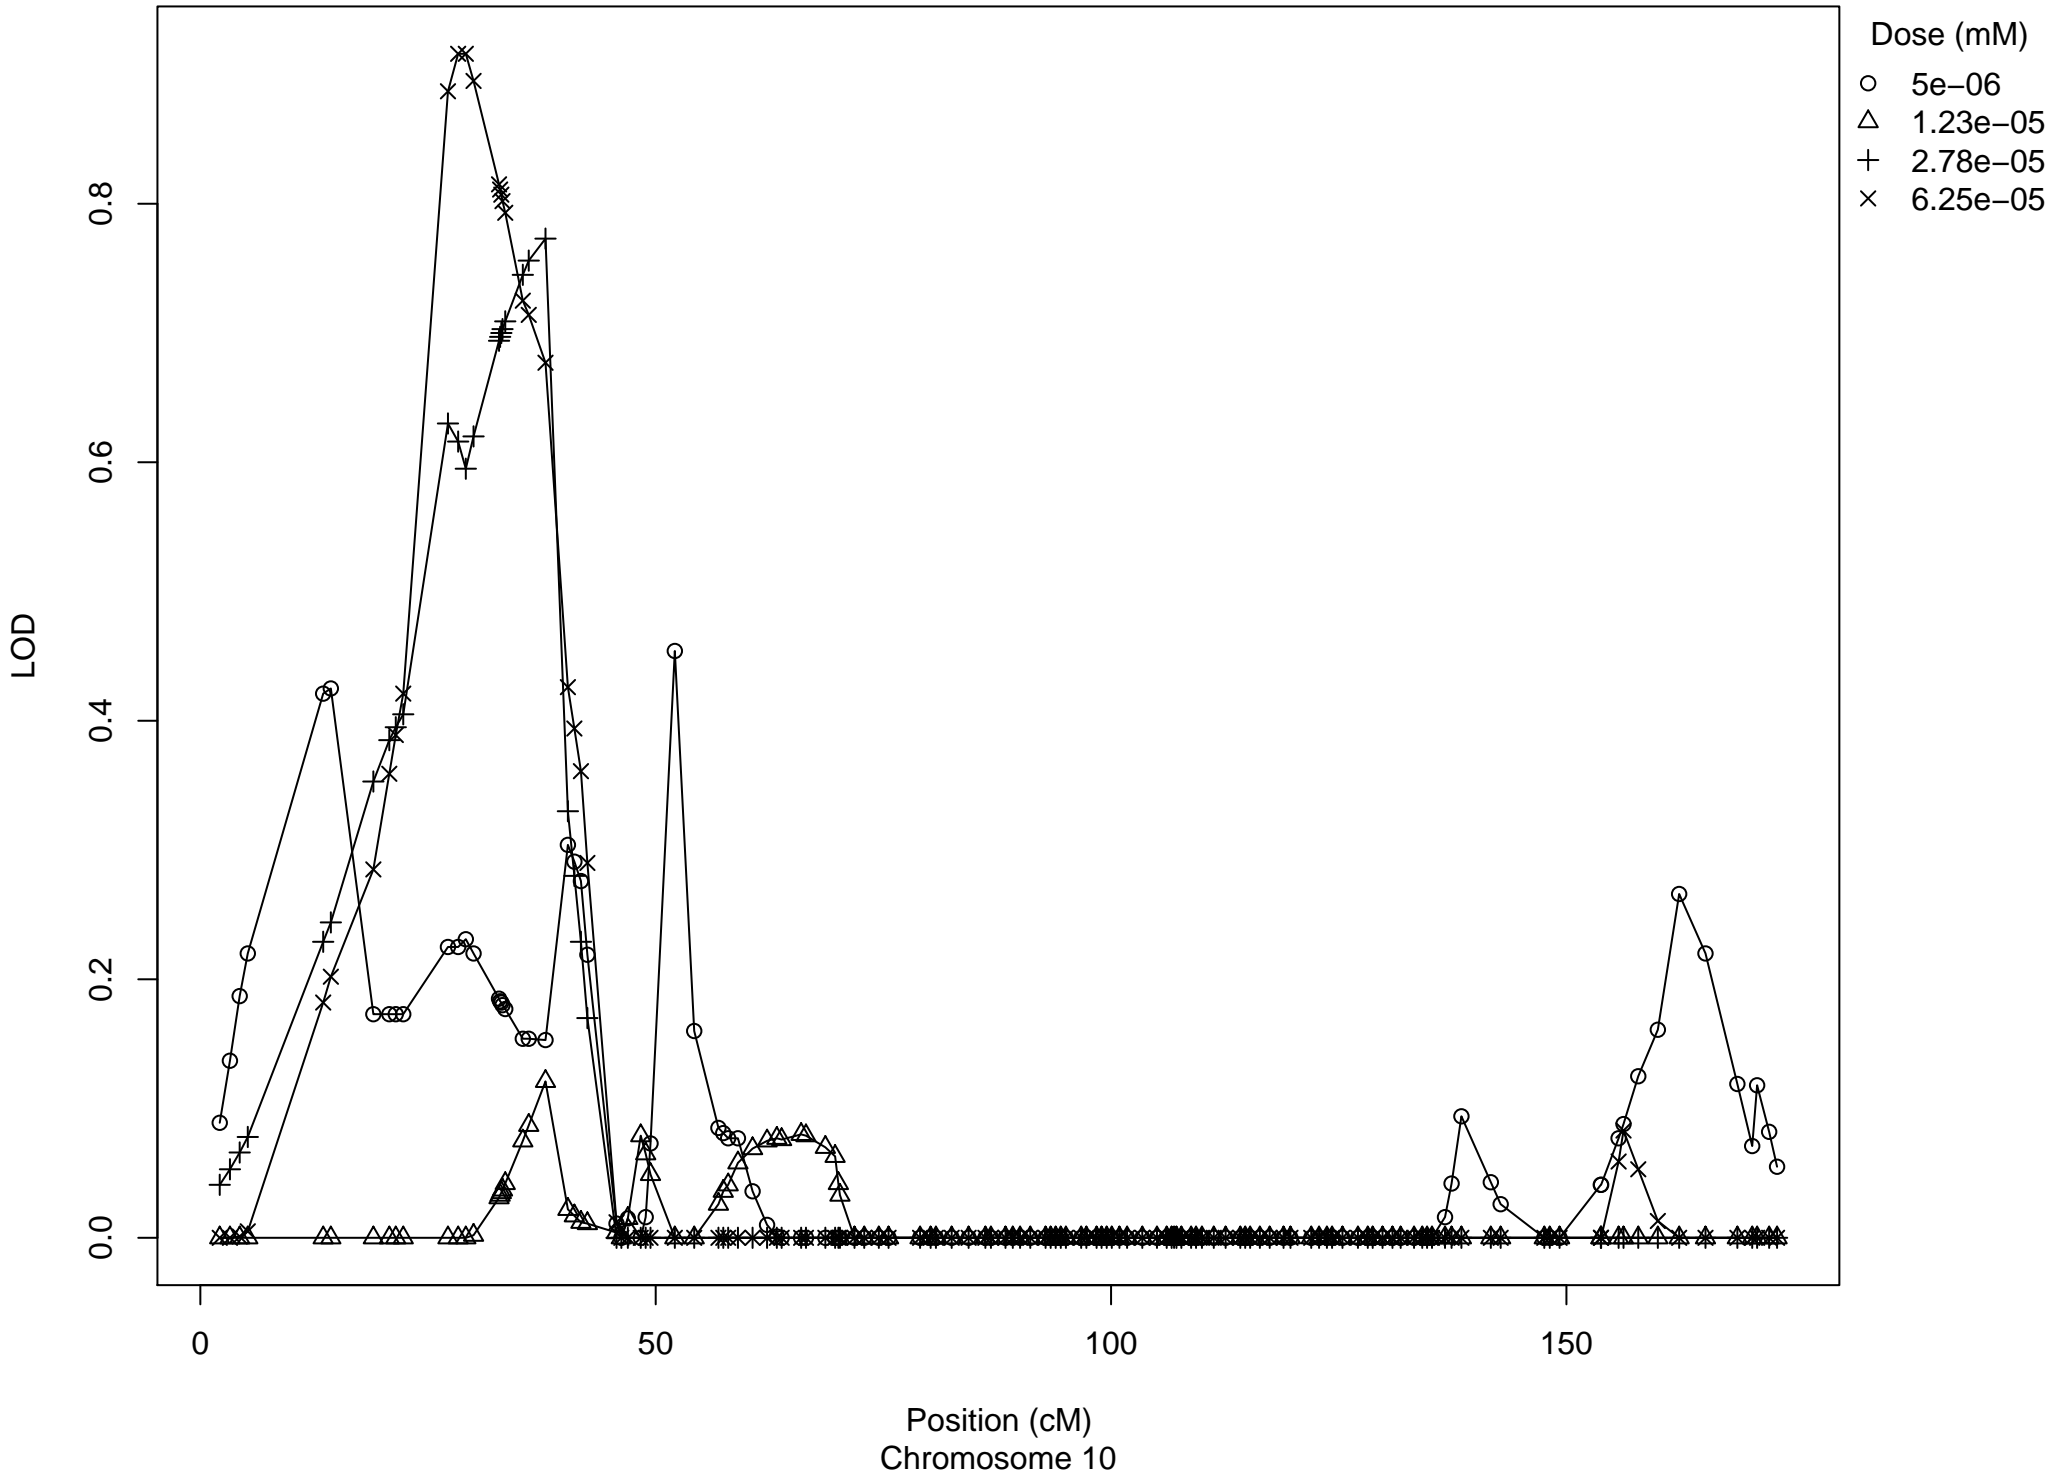



# Idarubicin hydrochloride (Ida)

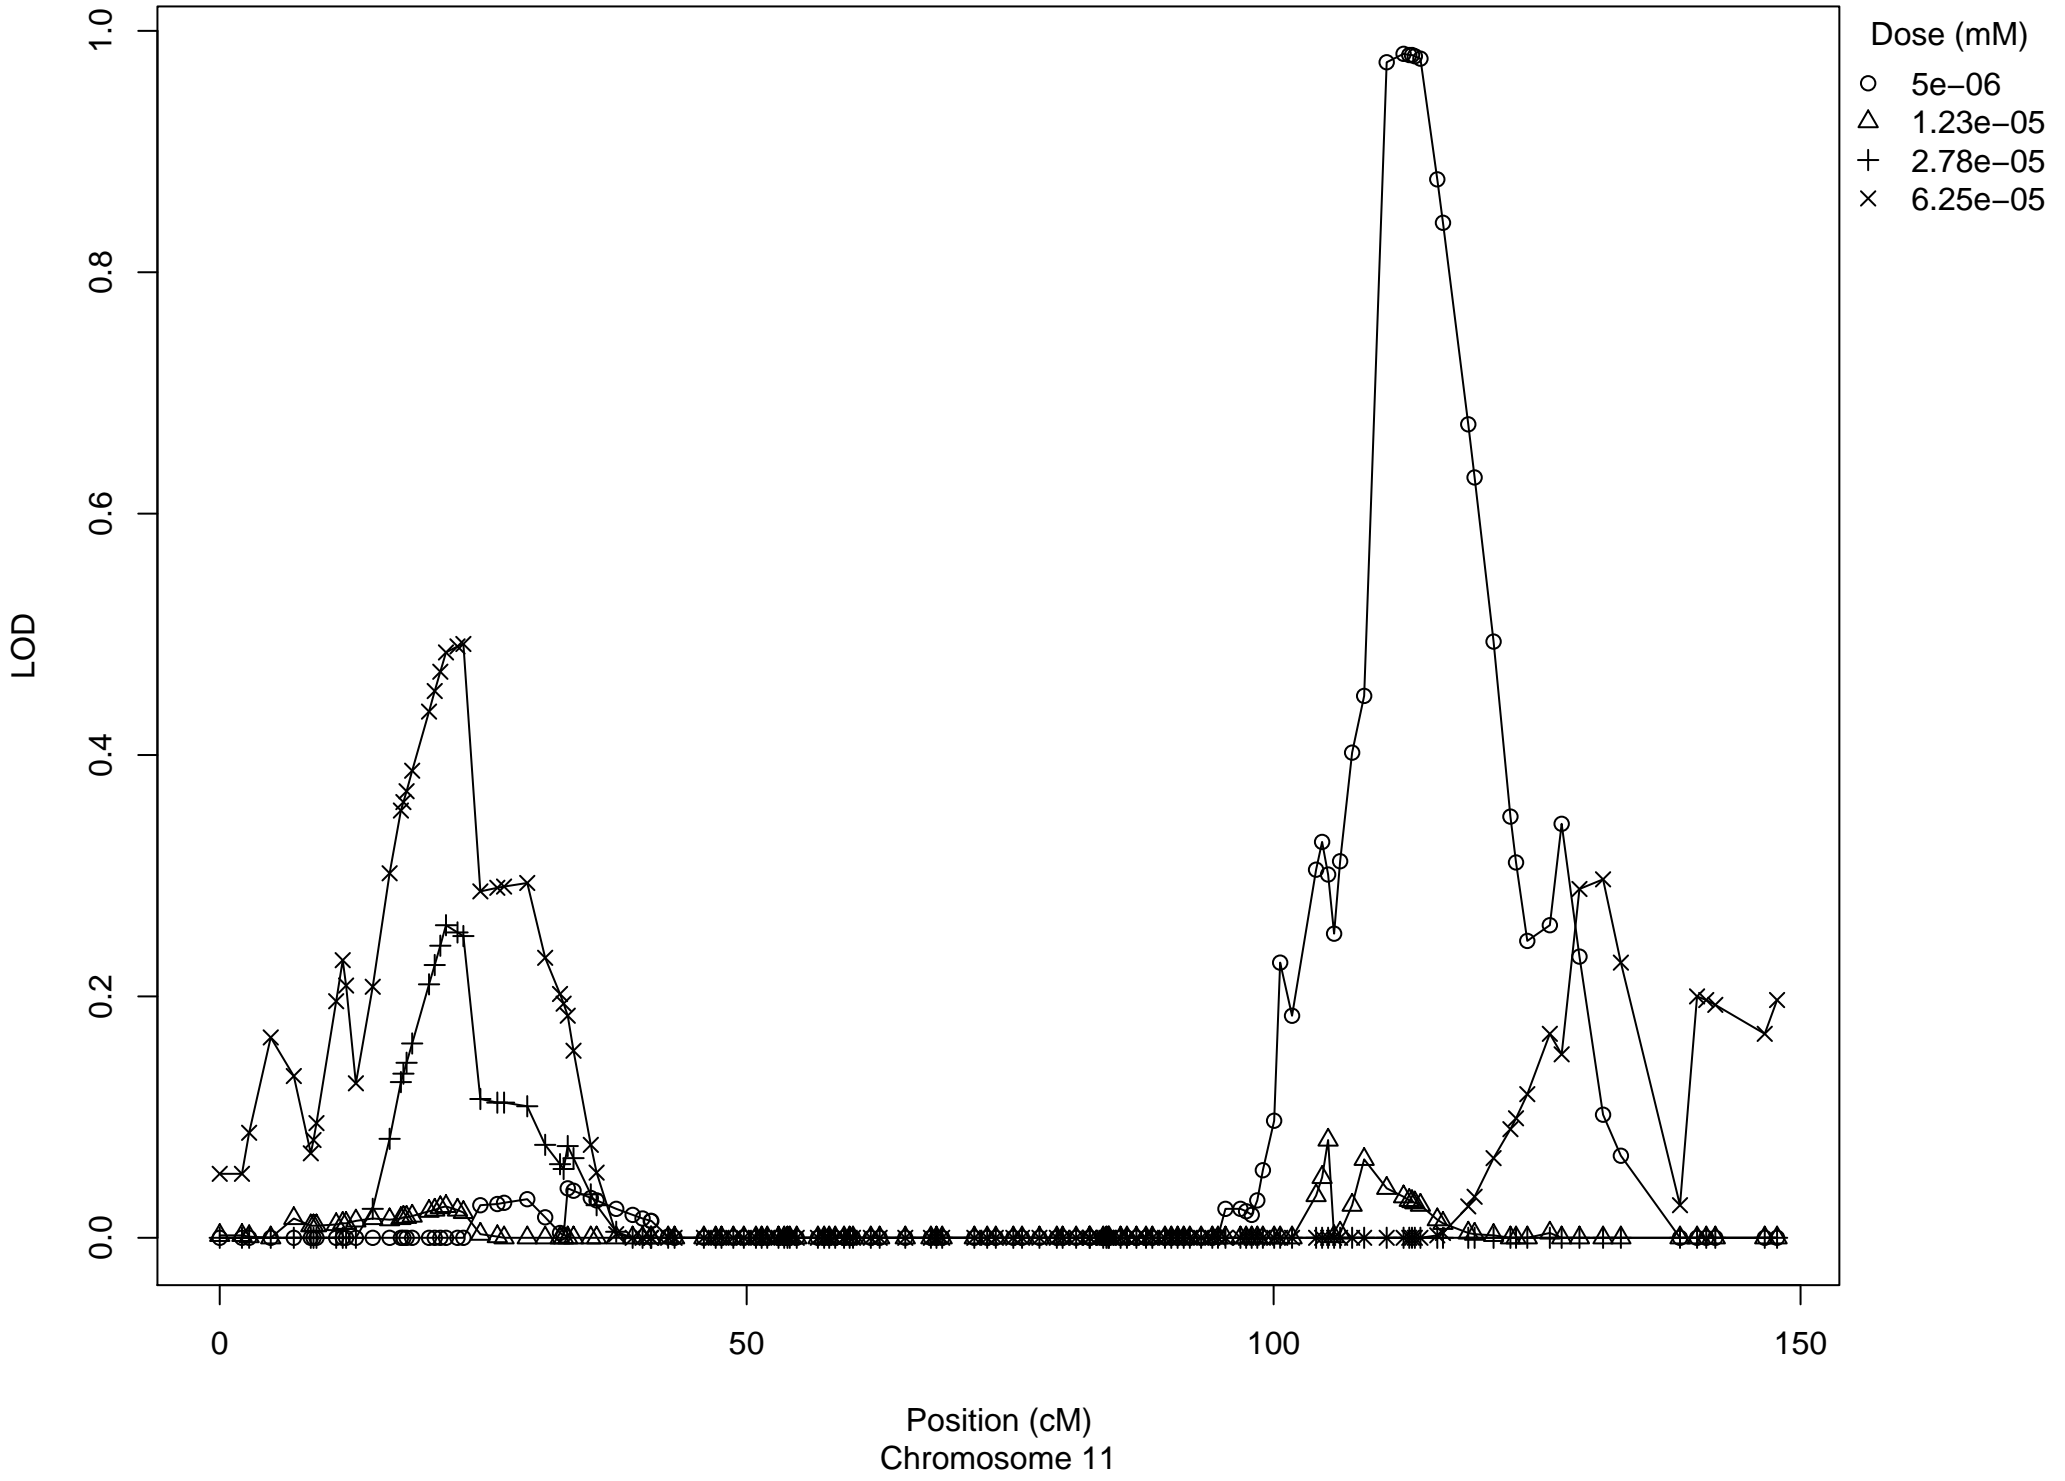

# Idarubicin hydrochloride (Ida)

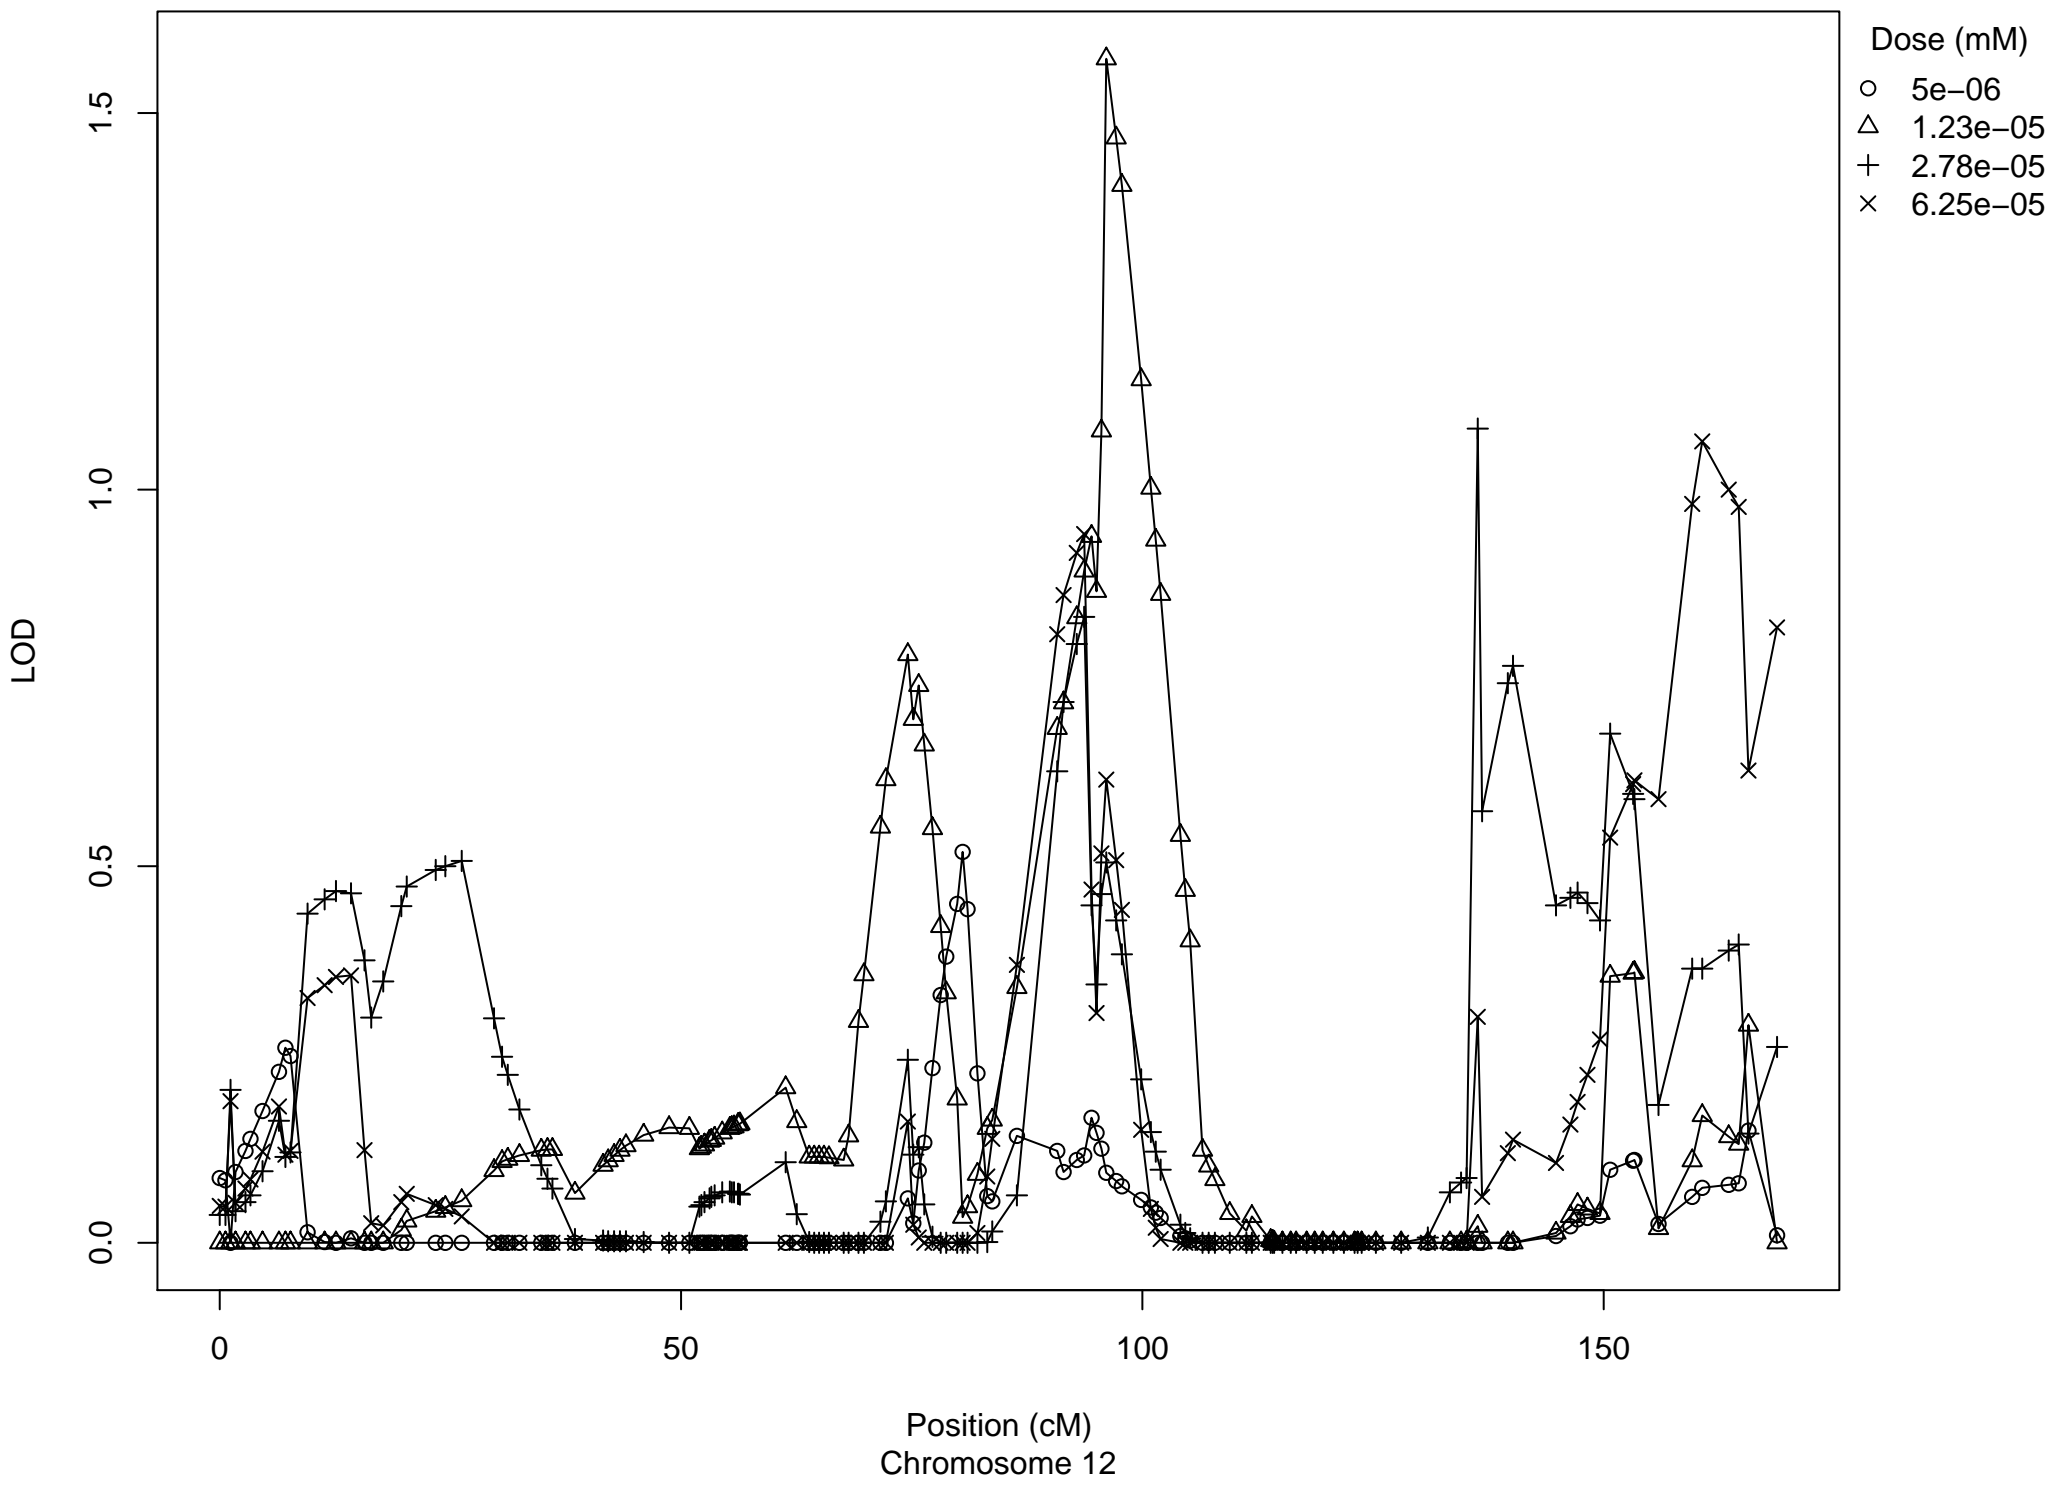

# Idarubicin hydrochloride (Ida)

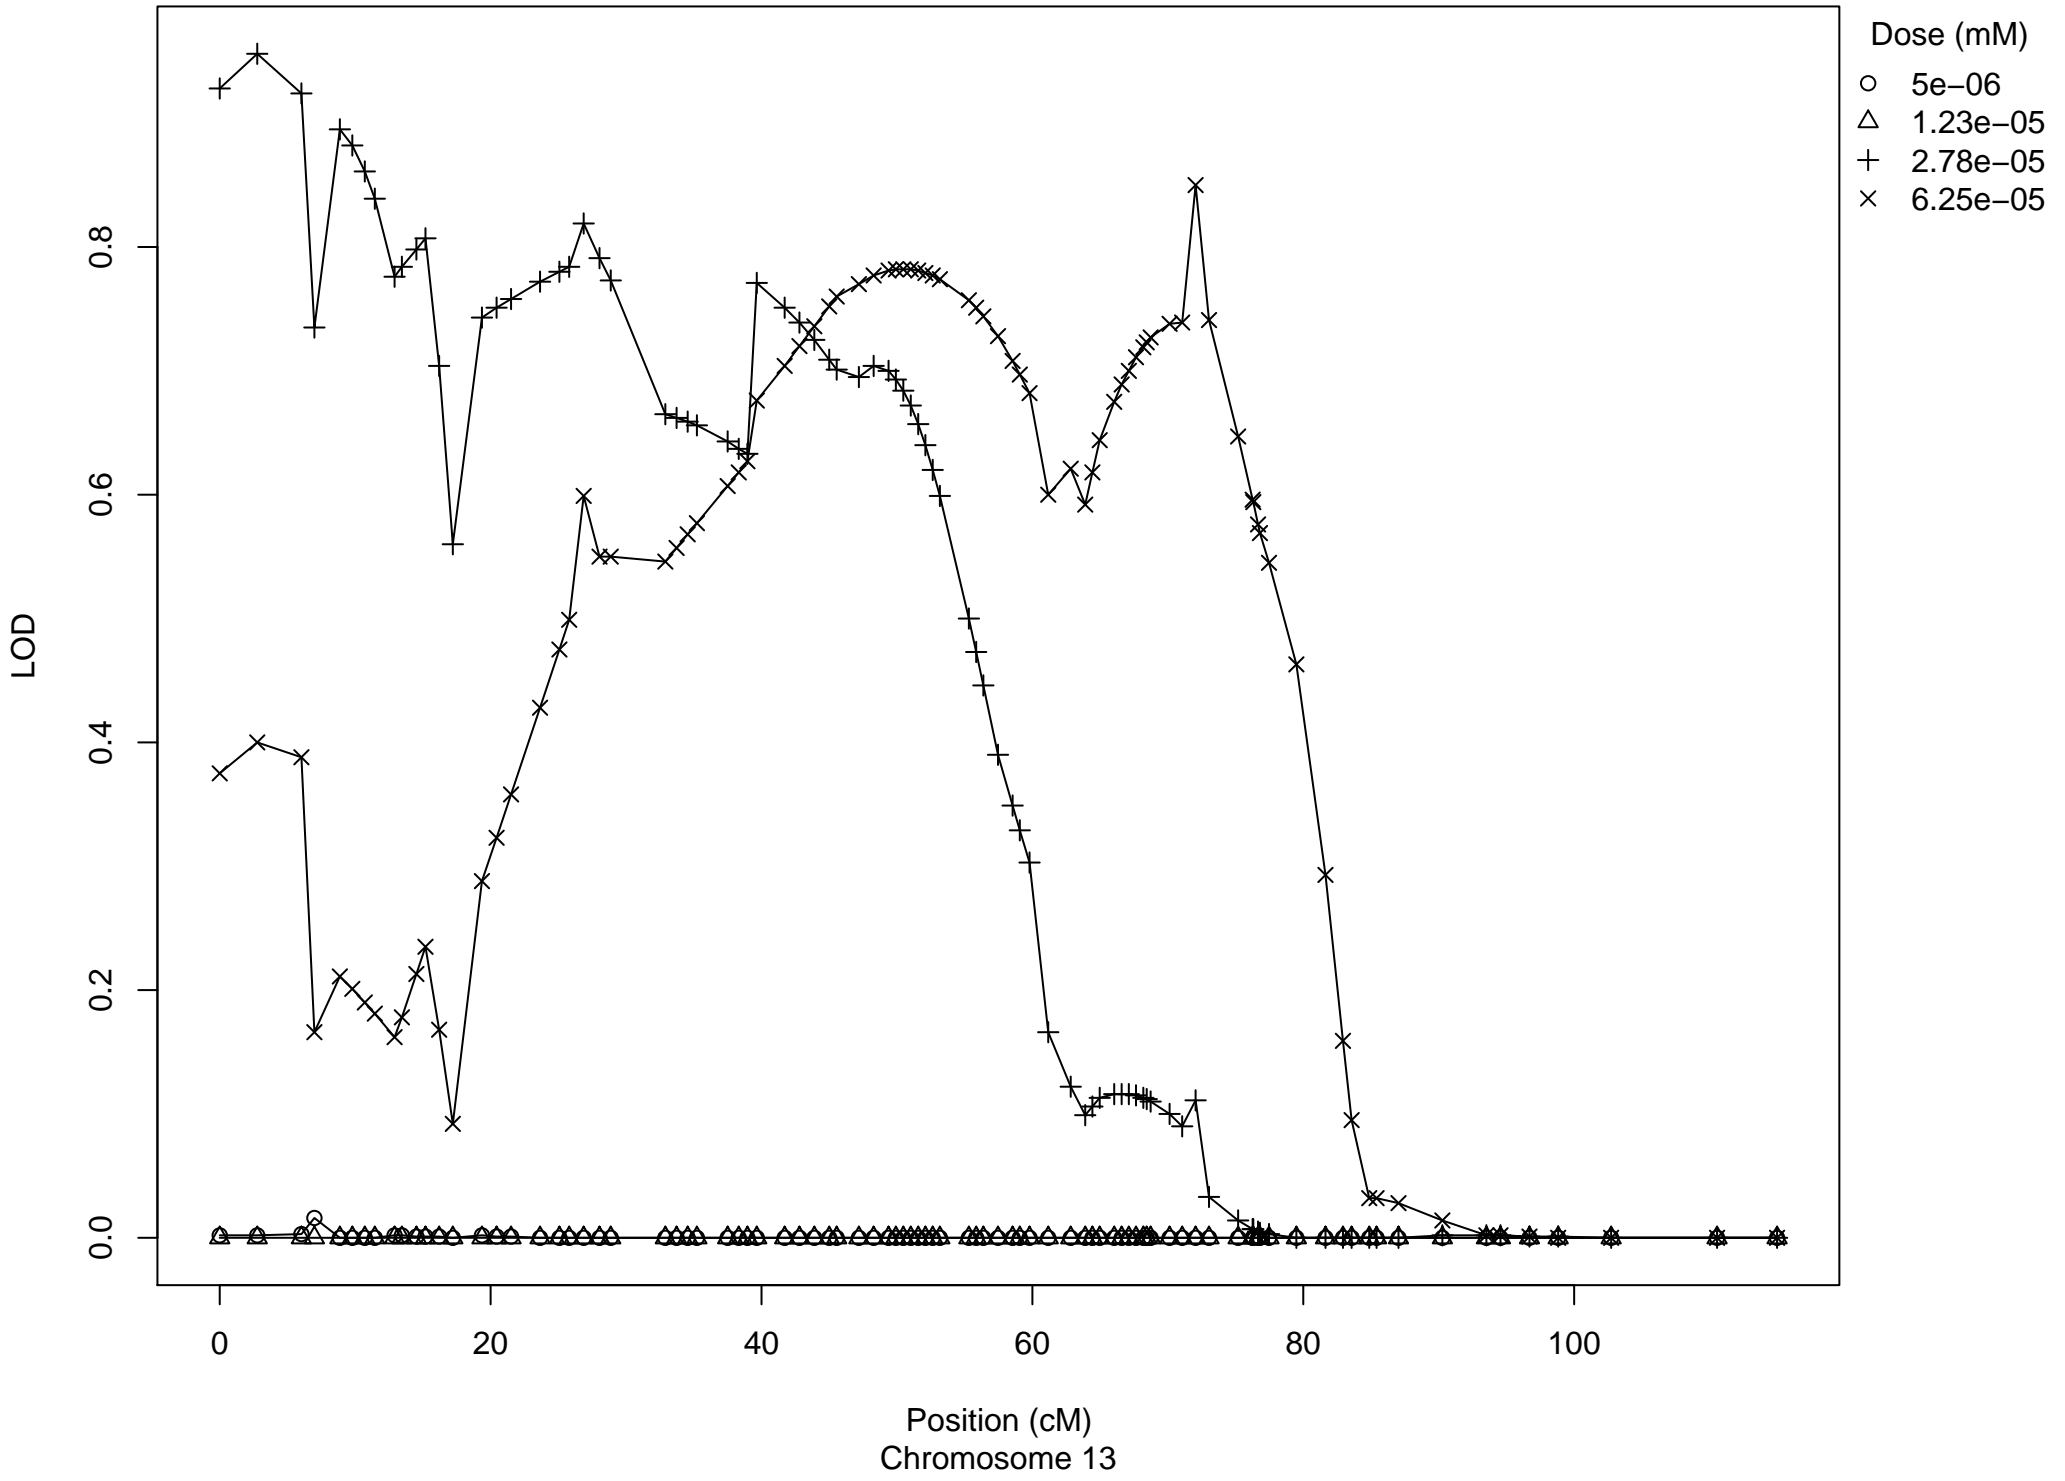

# Idarubicin hydrochloride (Ida)

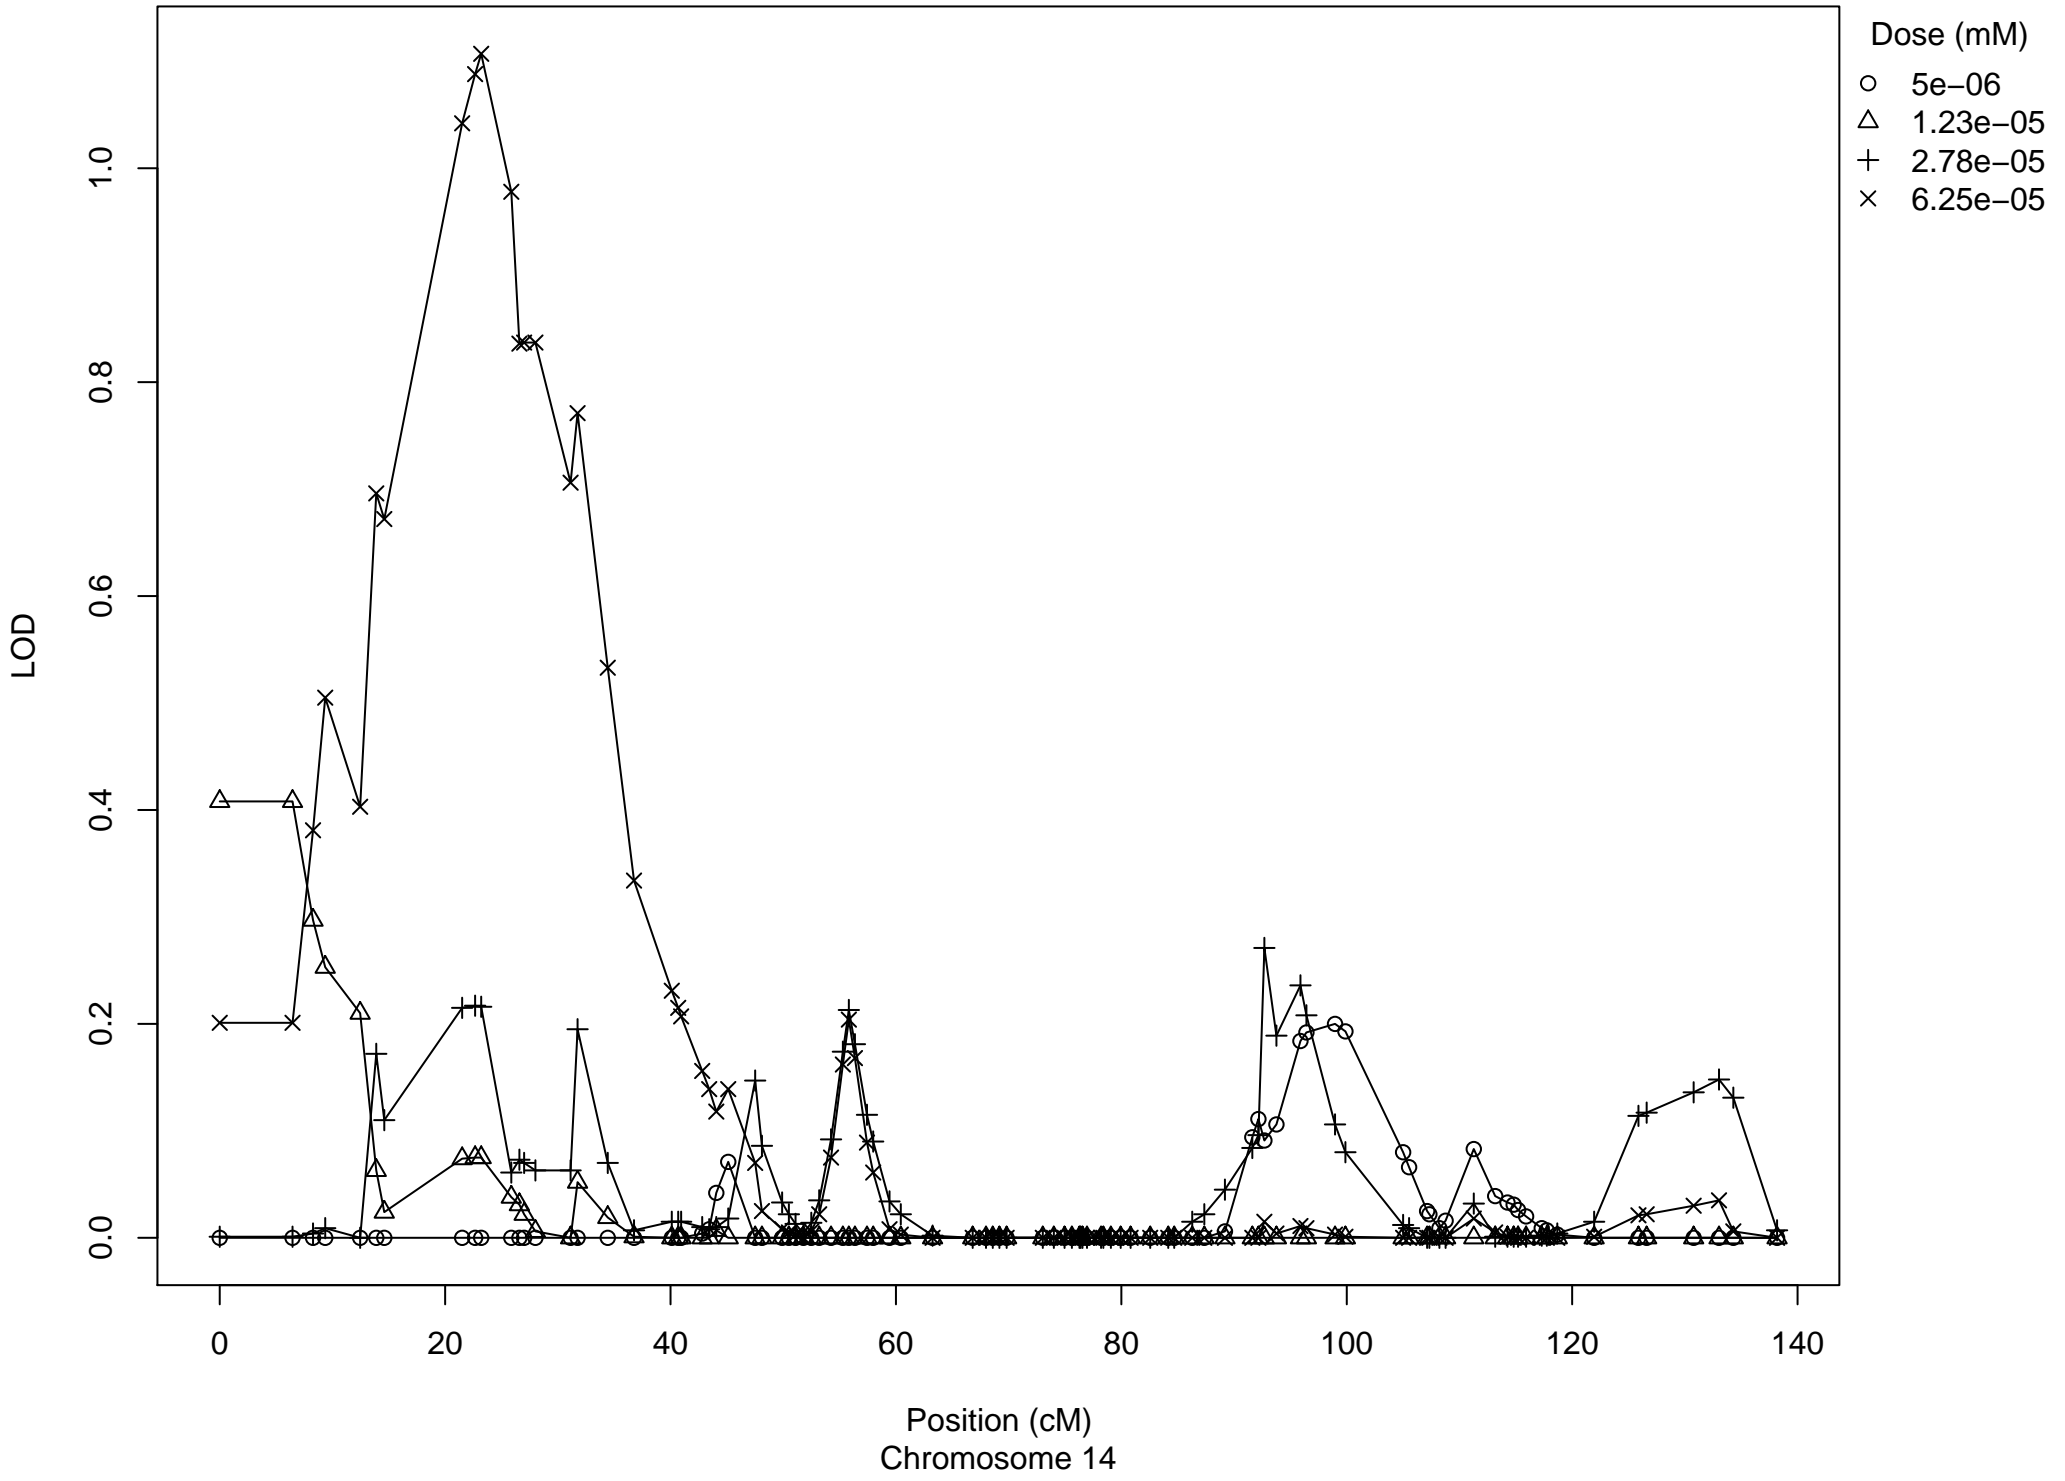

# Idarubicin hydrochloride (Ida)

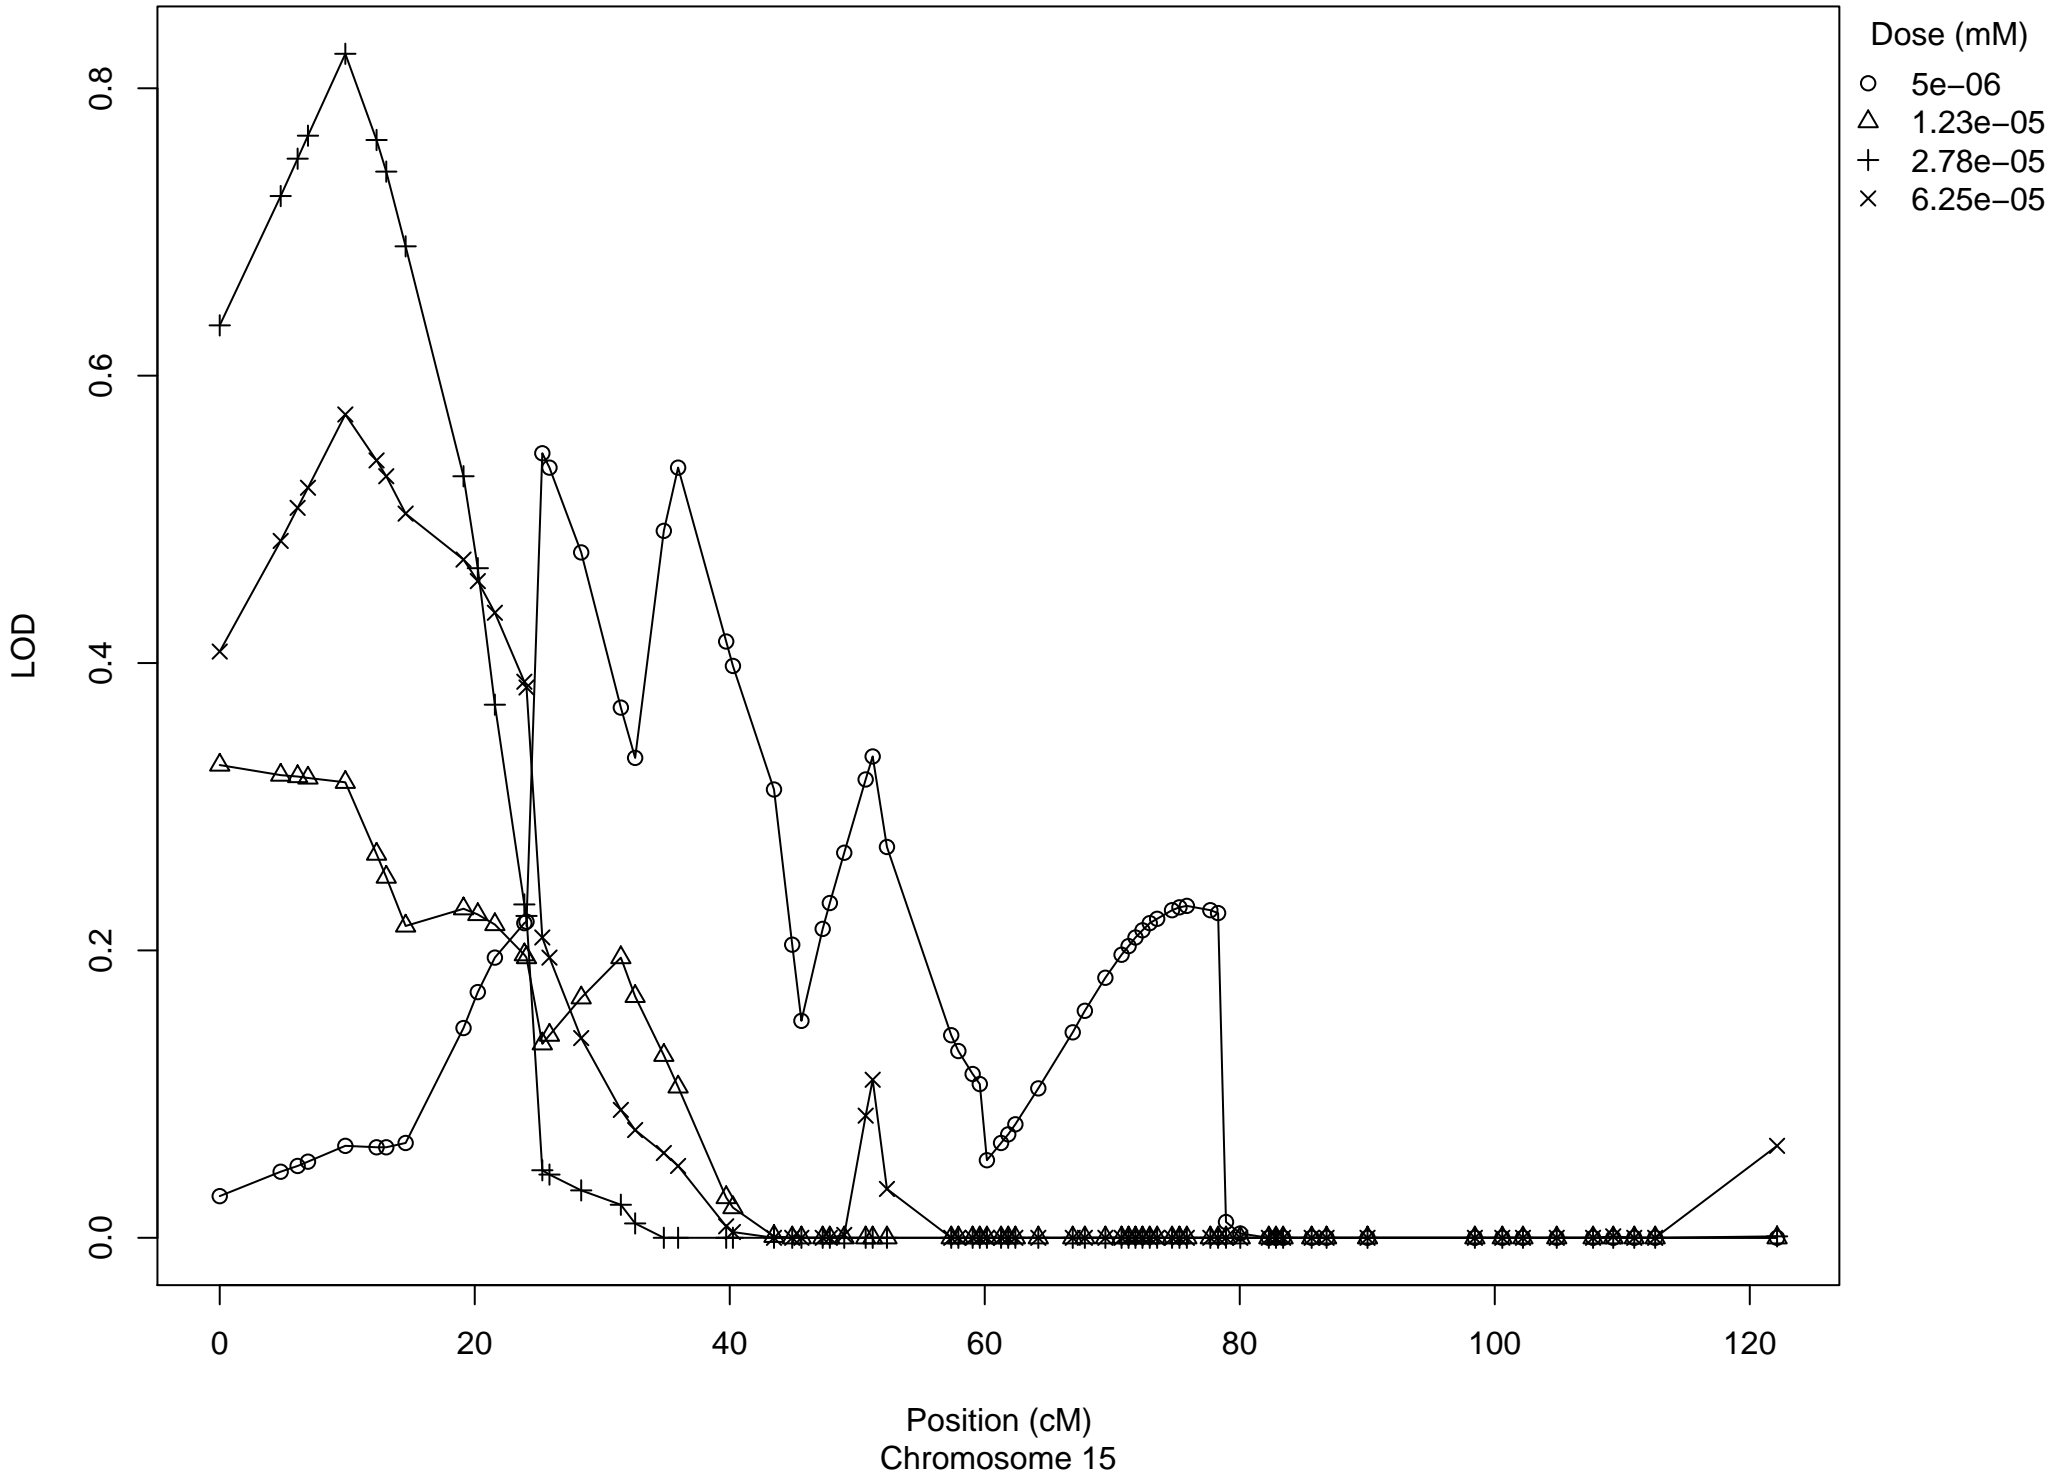

# Idarubicin hydrochloride (Ida)

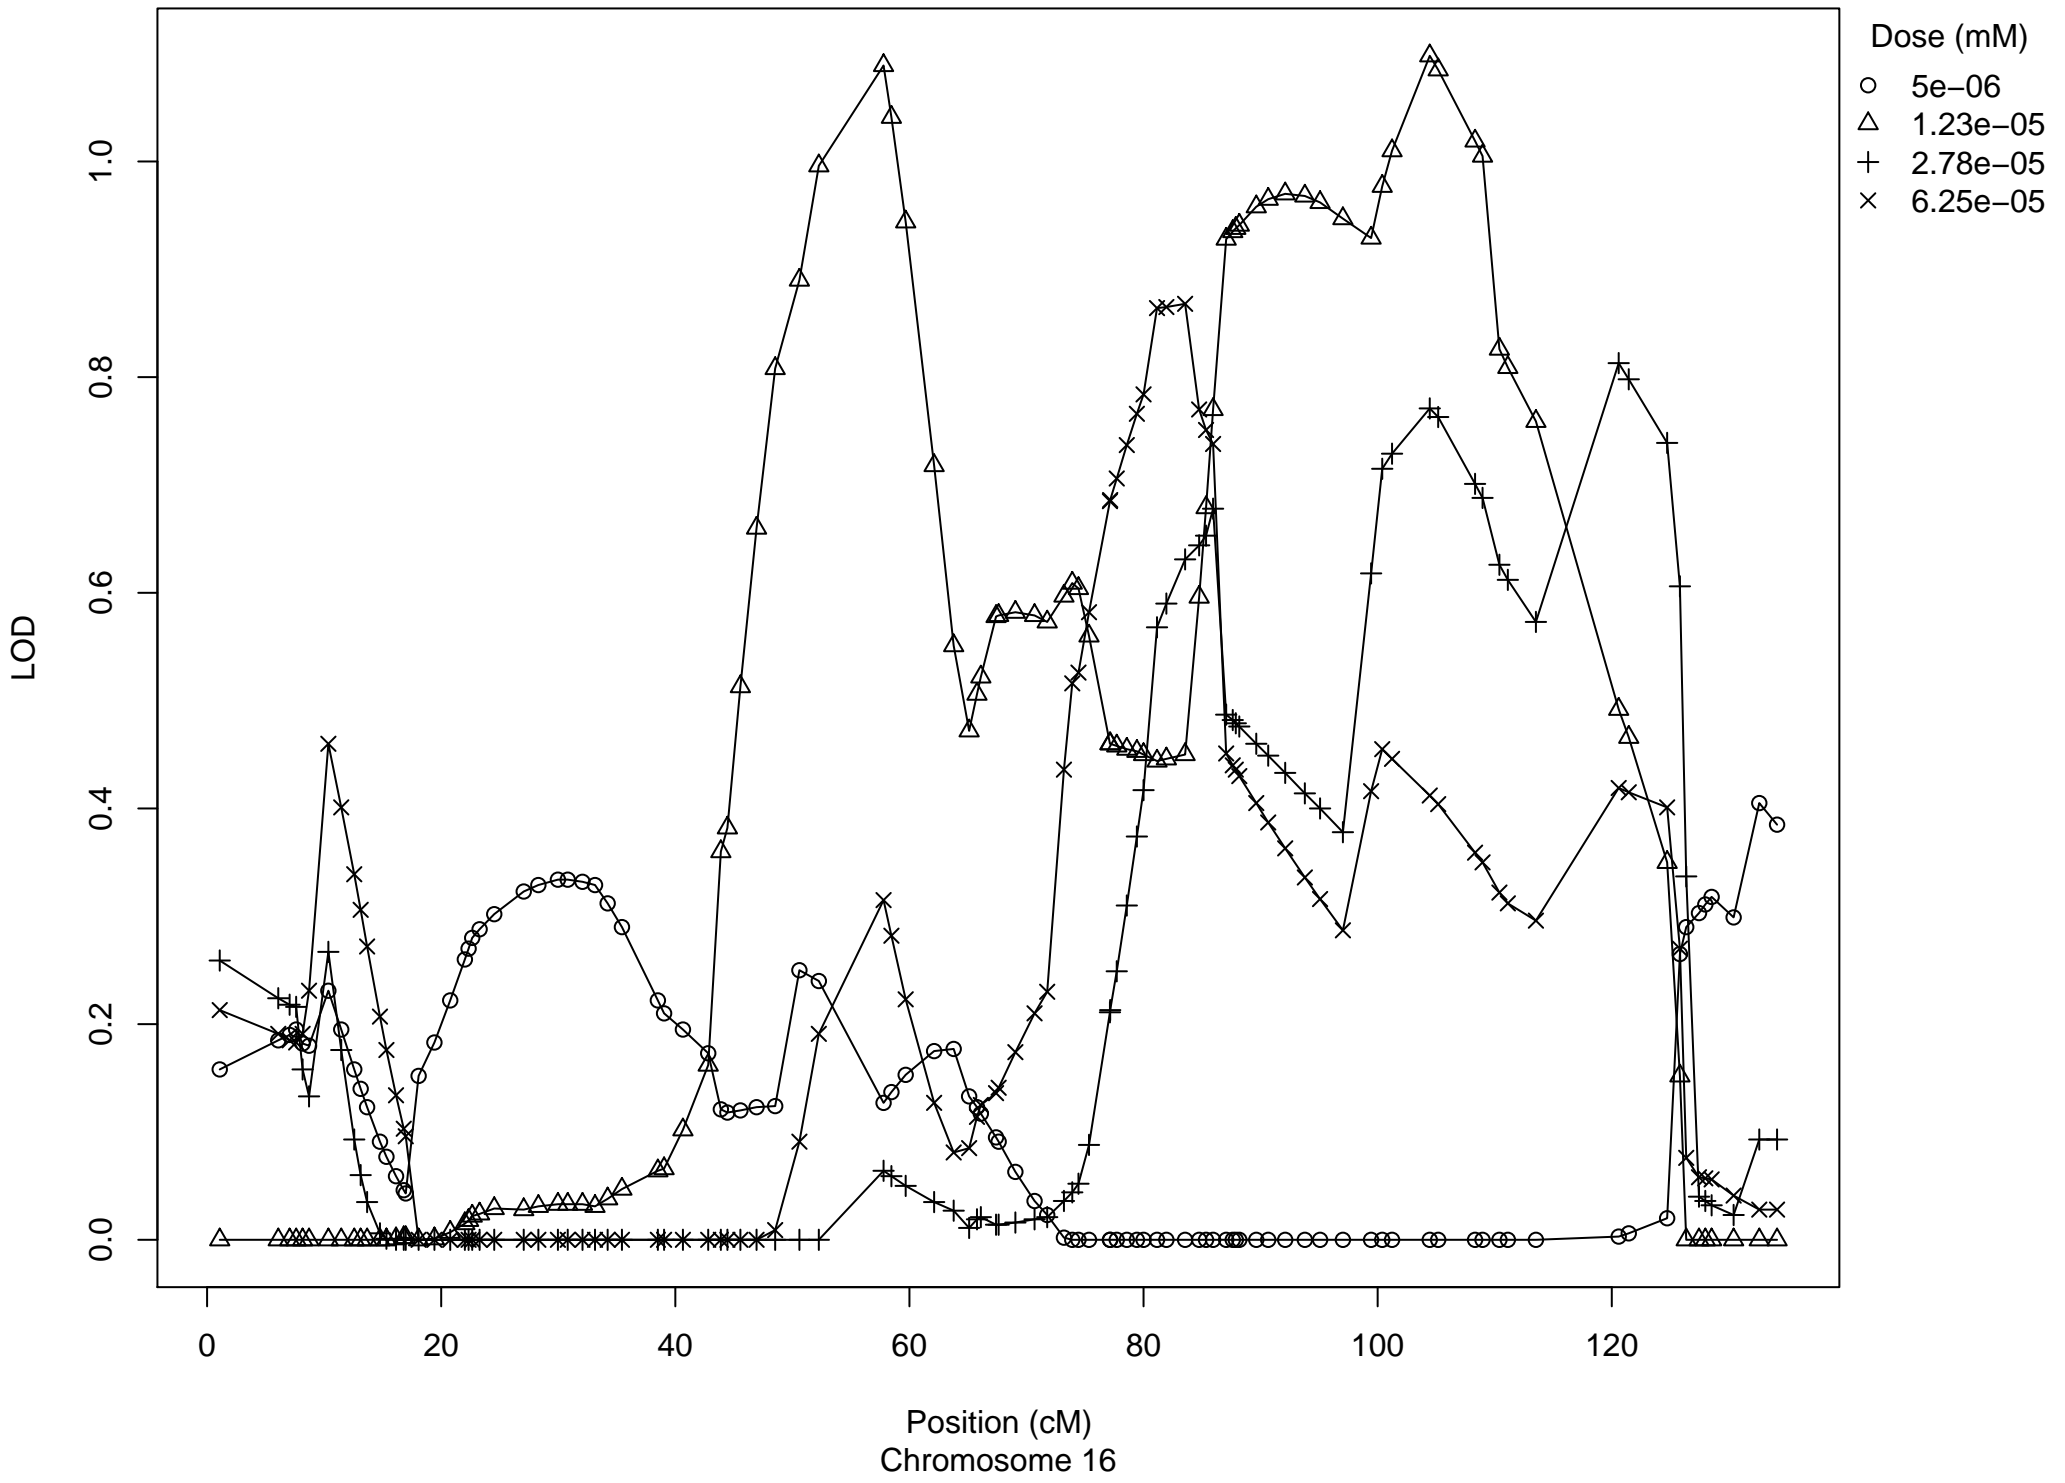

# Idarubicin hydrochloride (Ida)

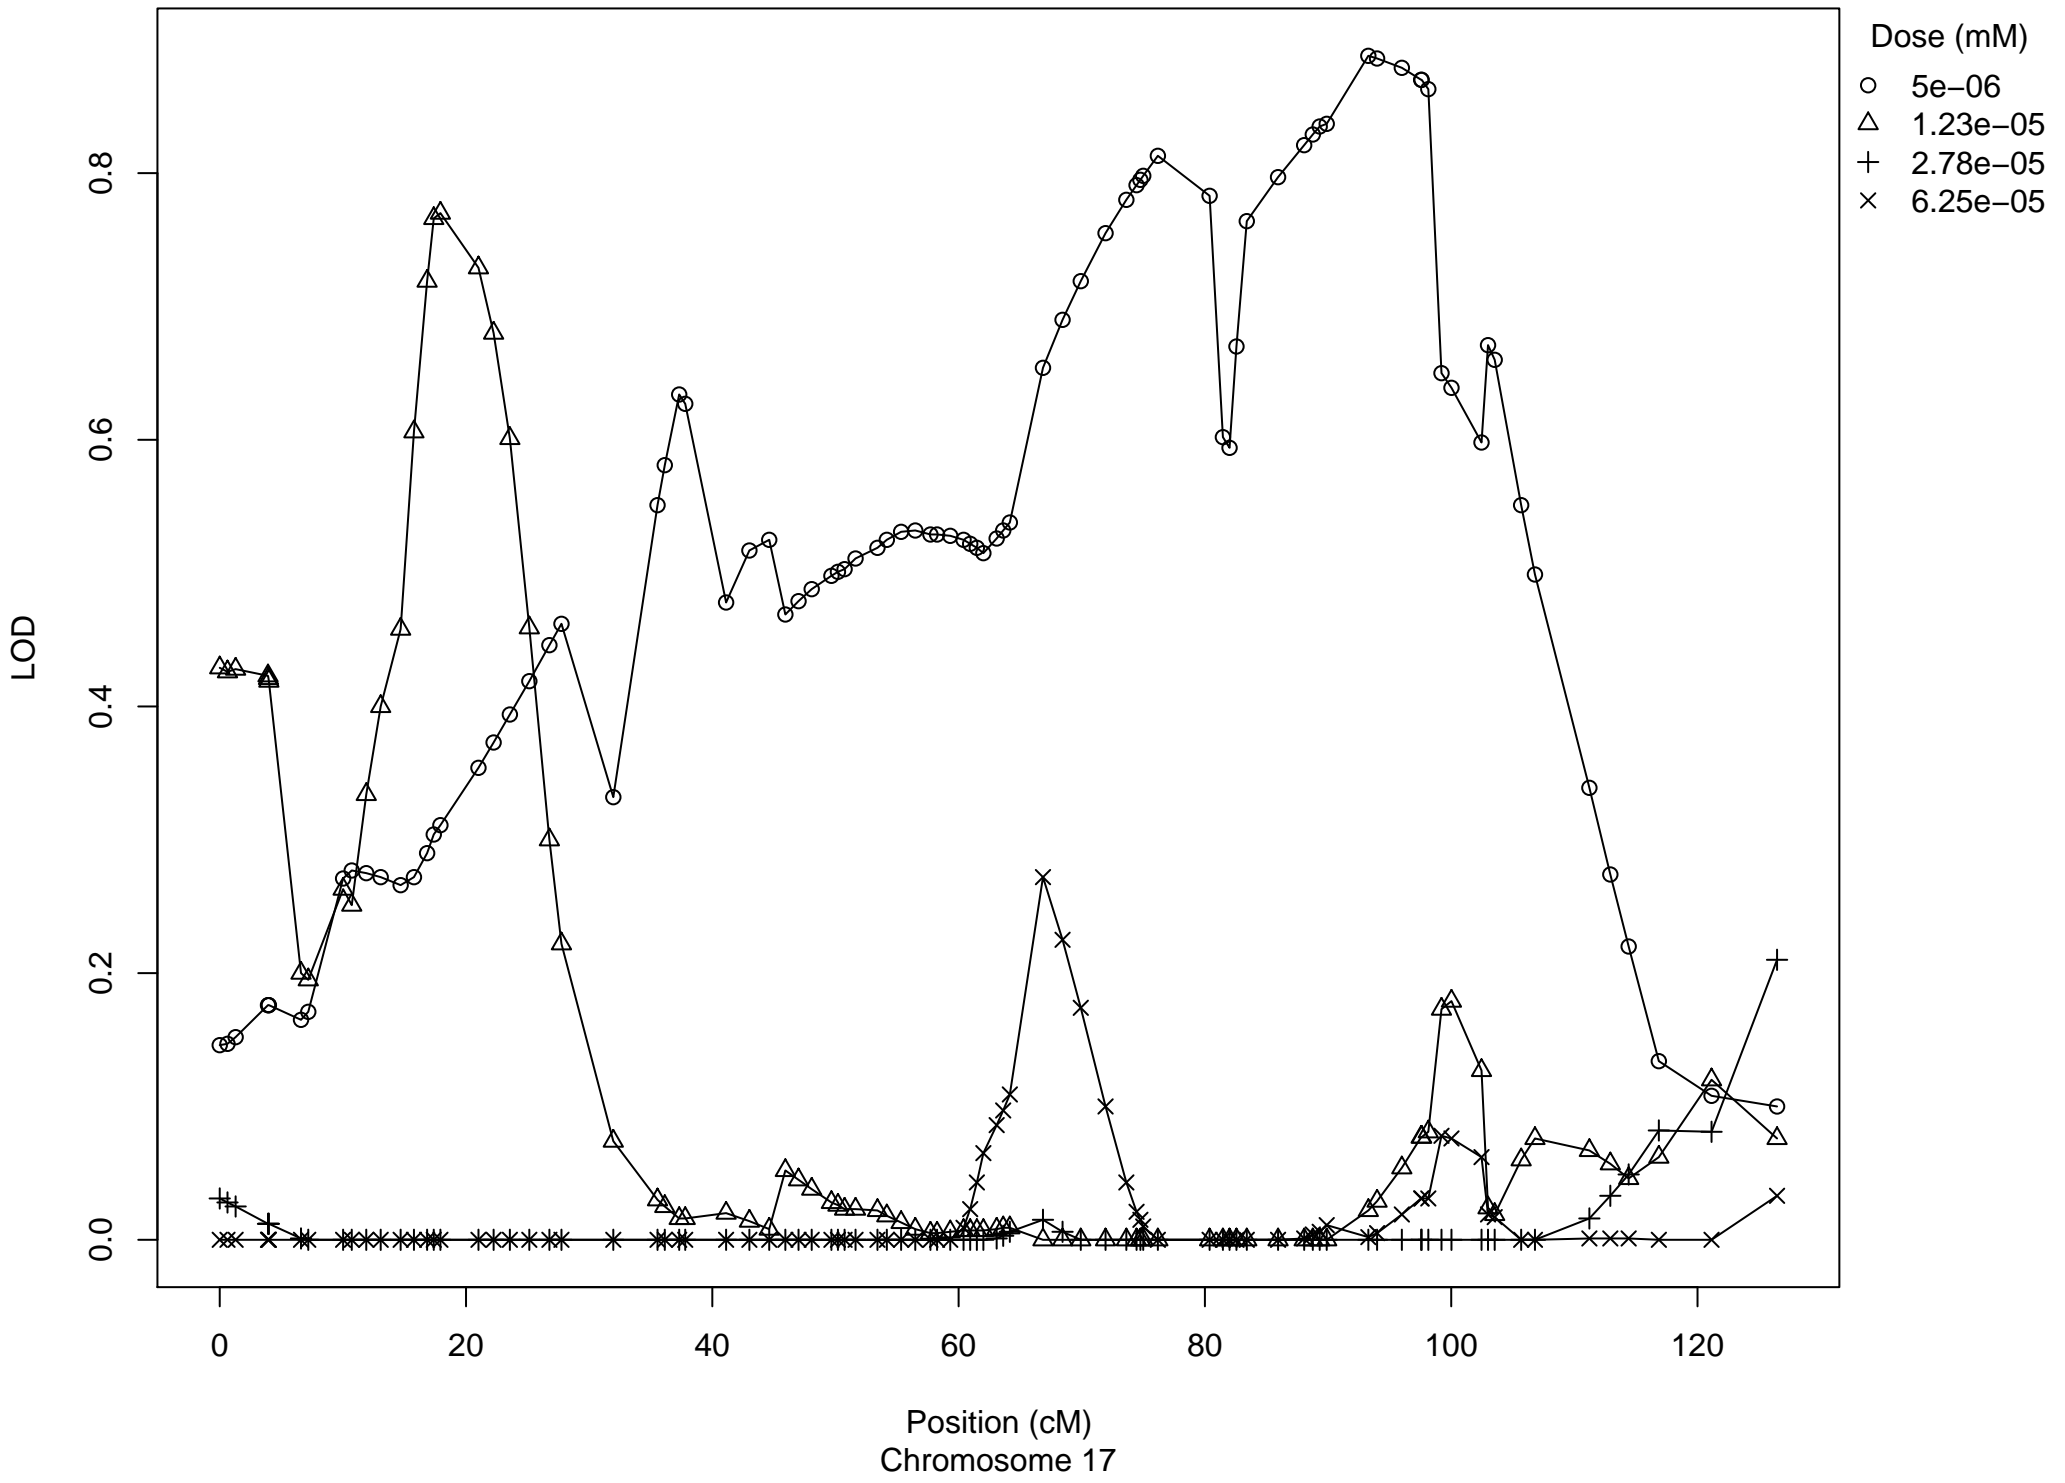

# Idarubicin hydrochloride (Ida)

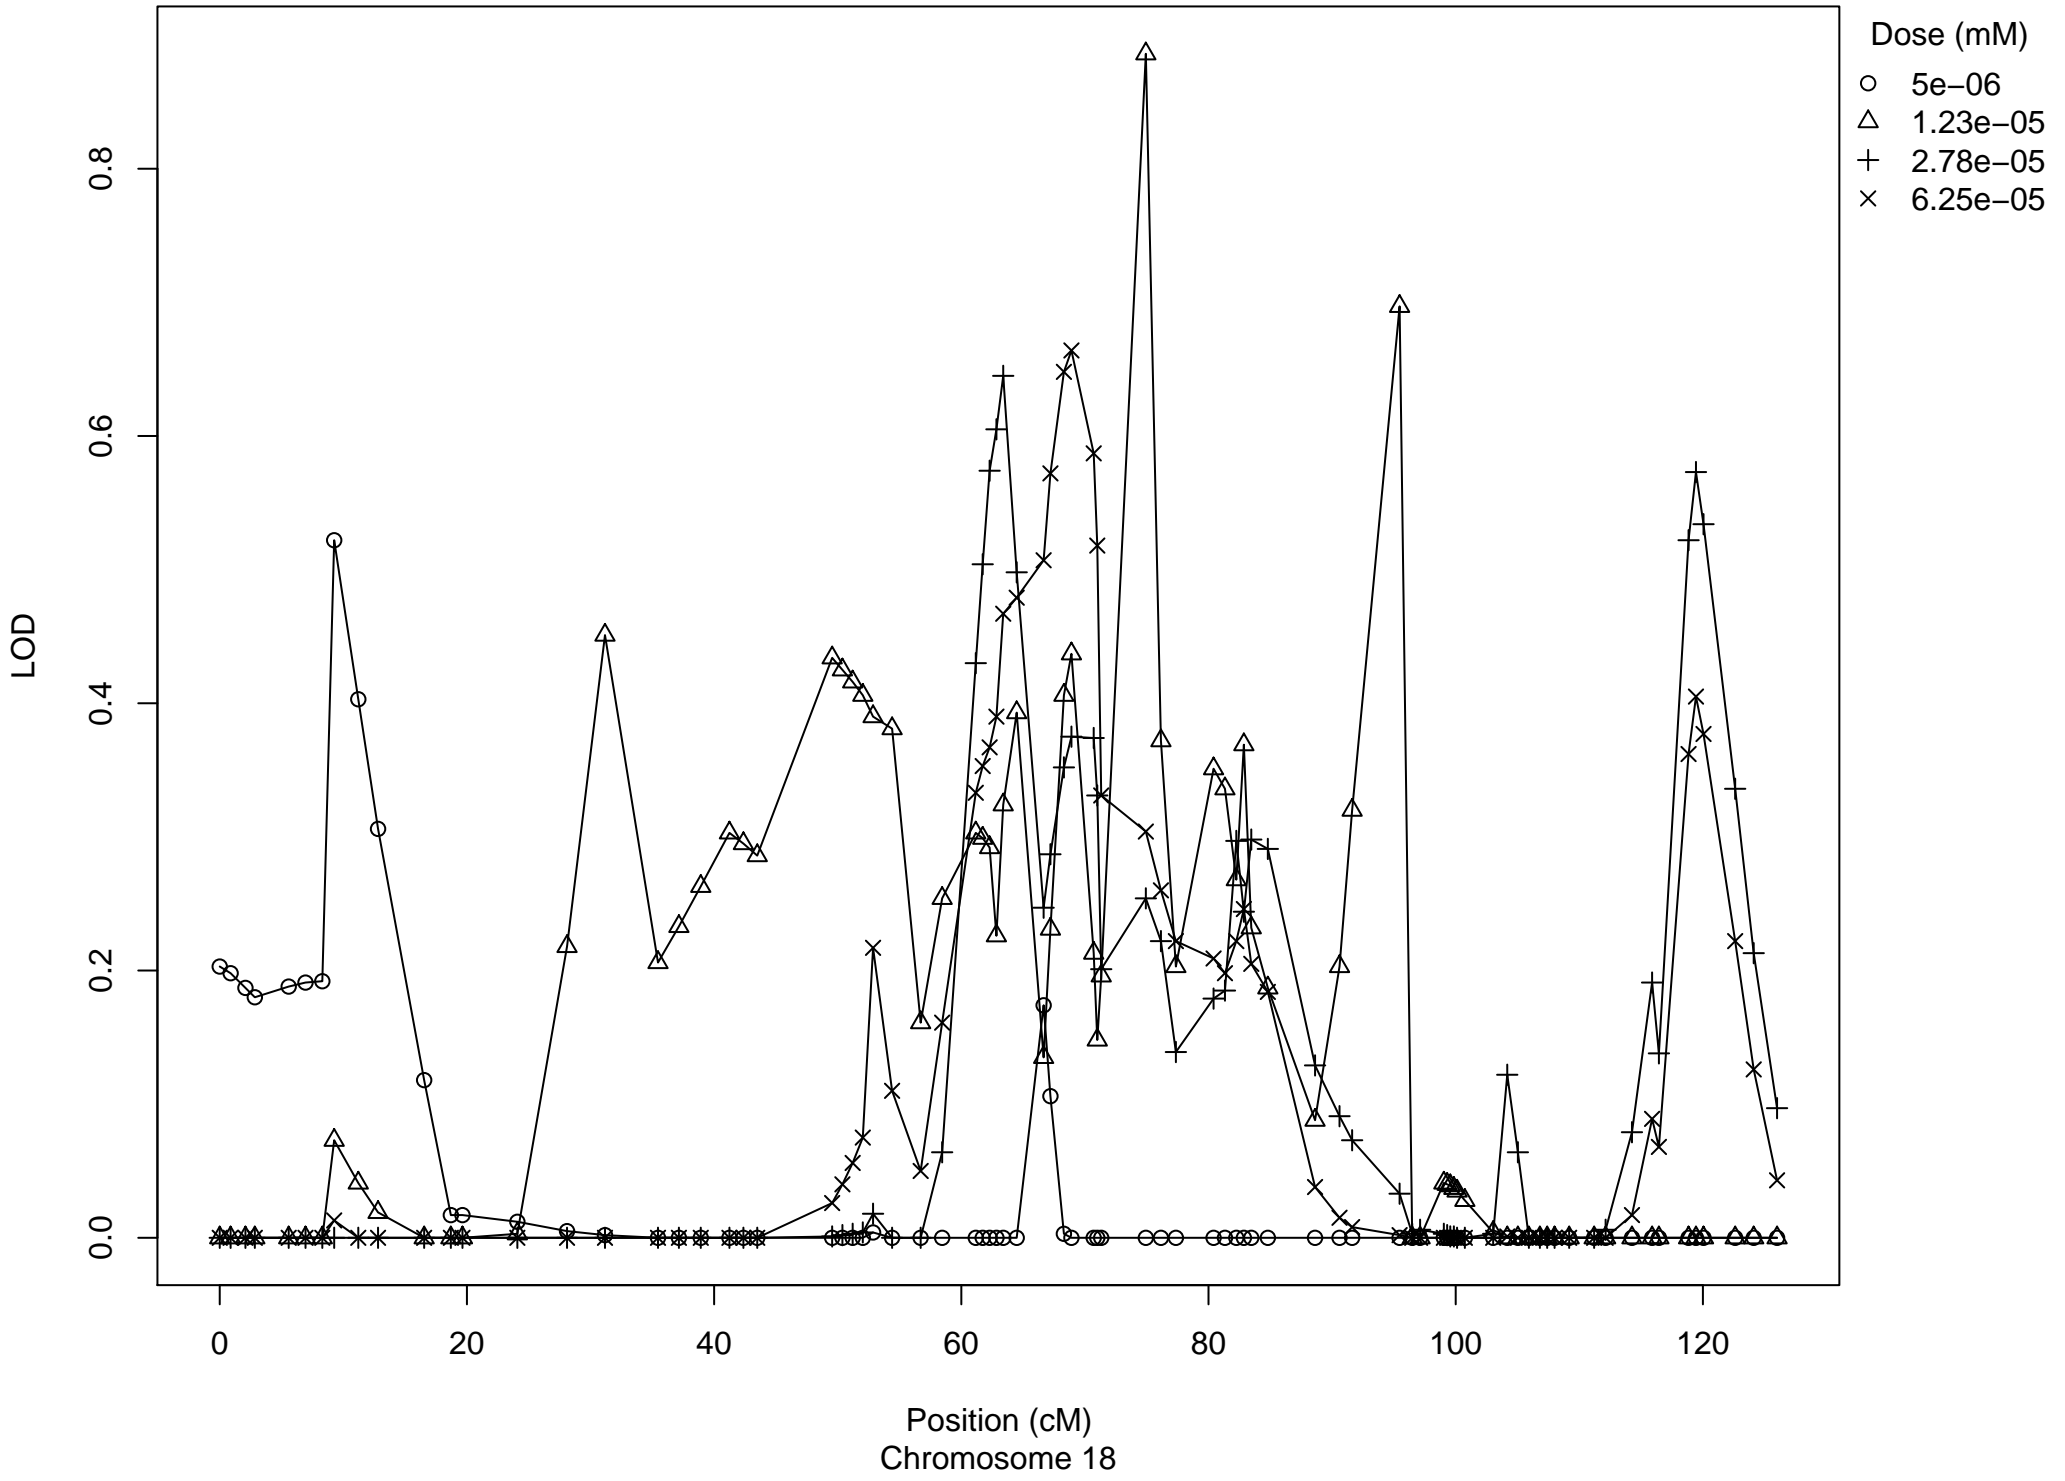



# Idarubicin hydrochloride (Ida)

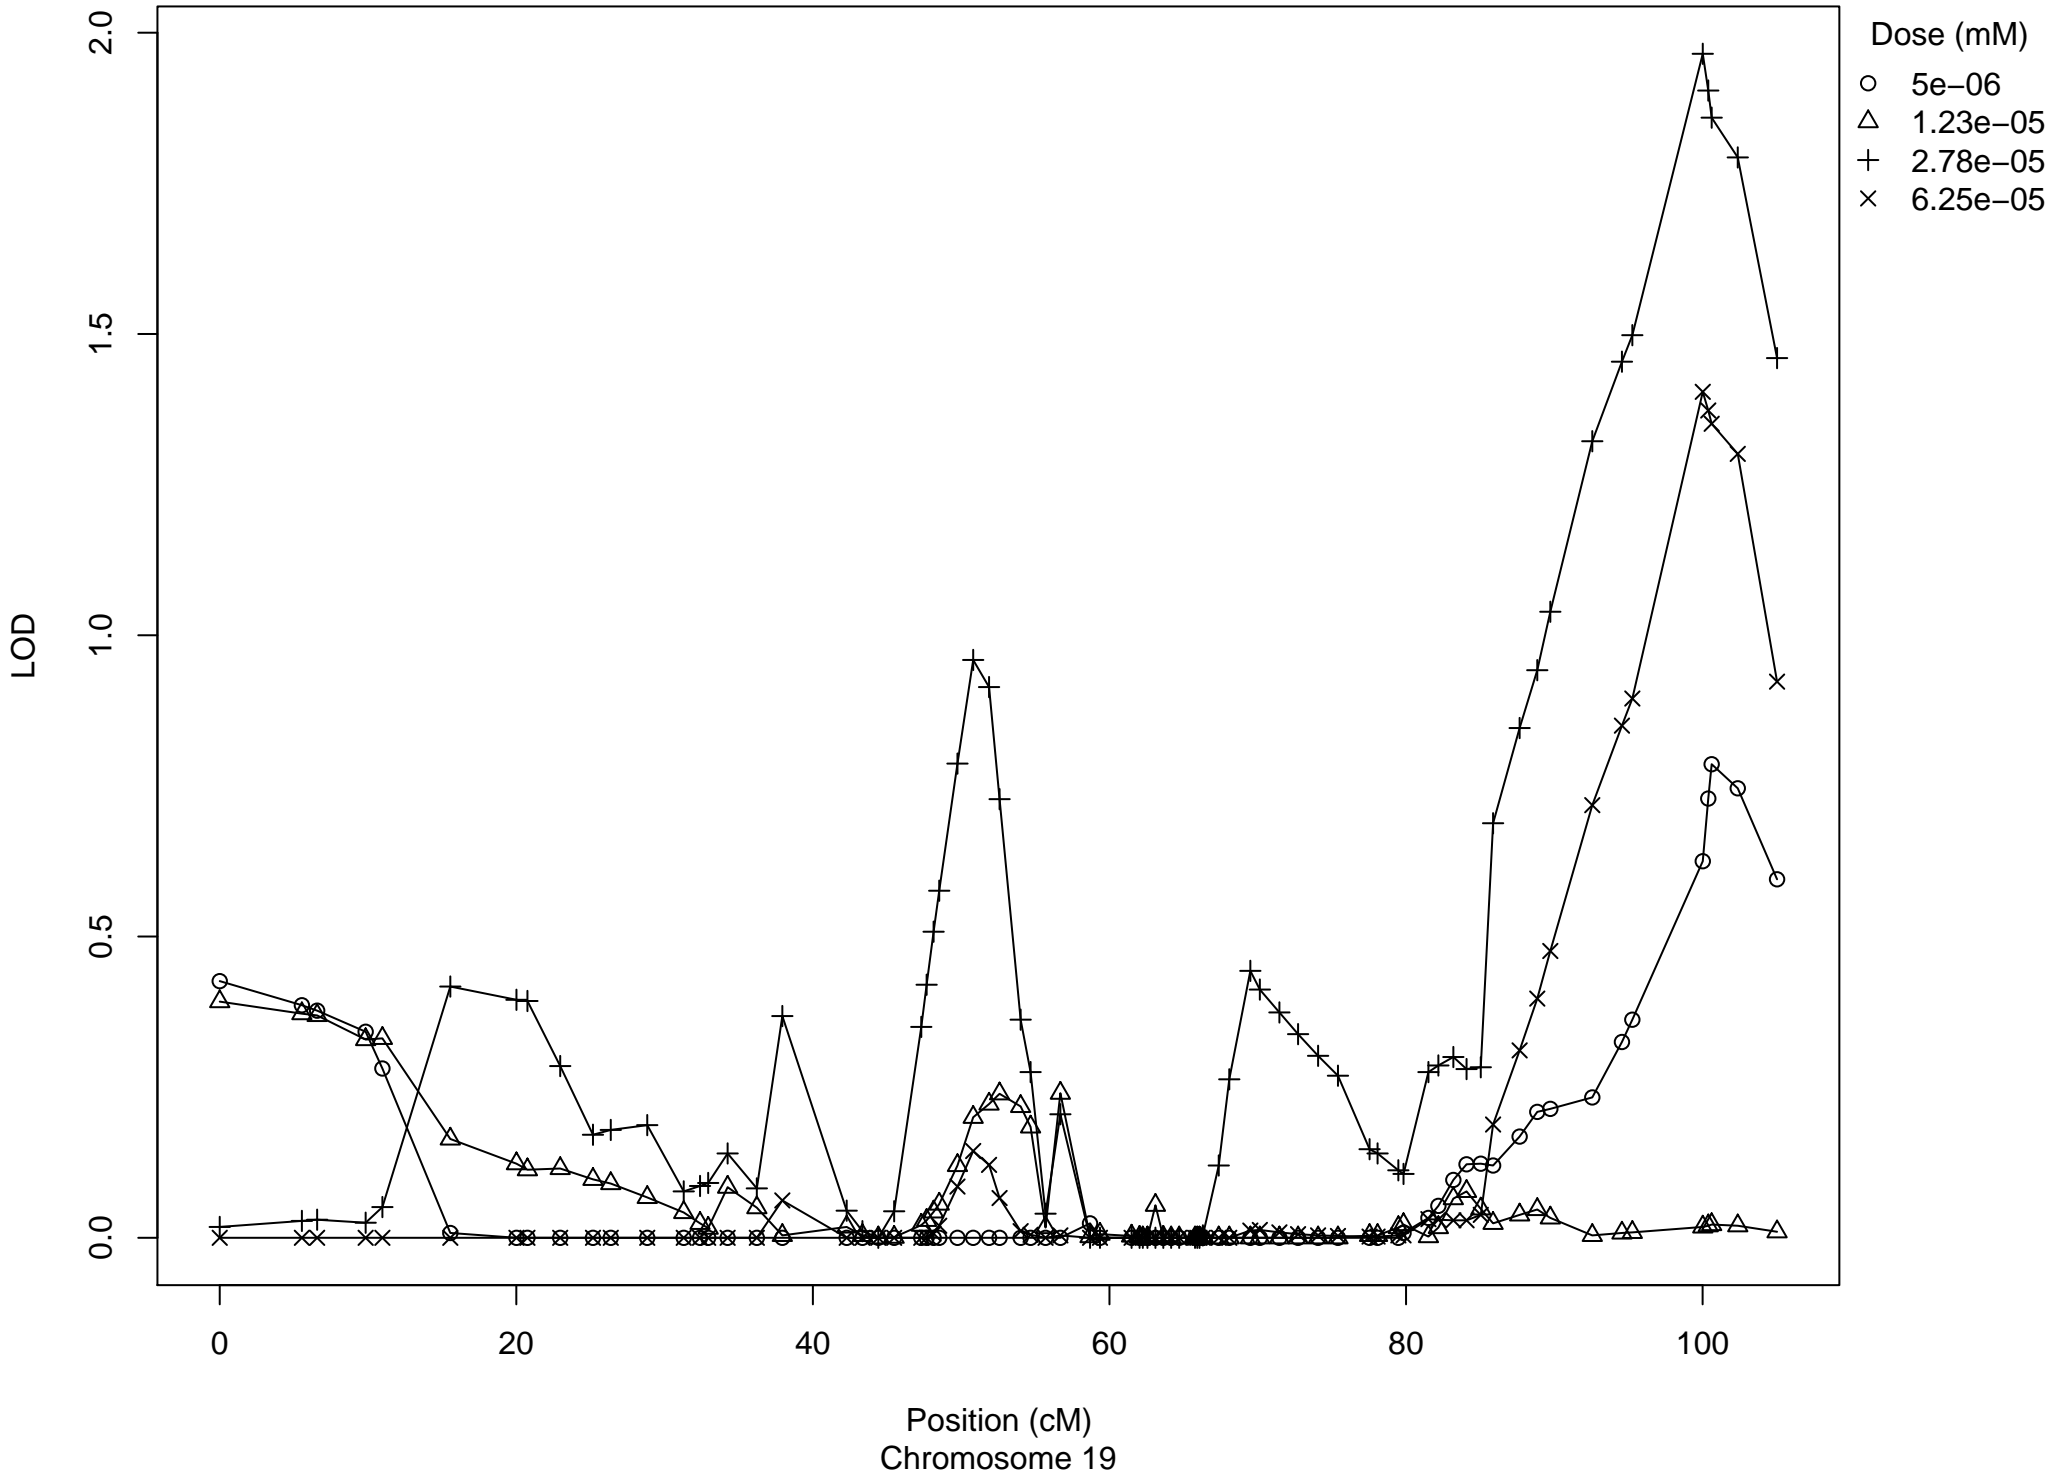

# Idarubicin hydrochloride (Ida)

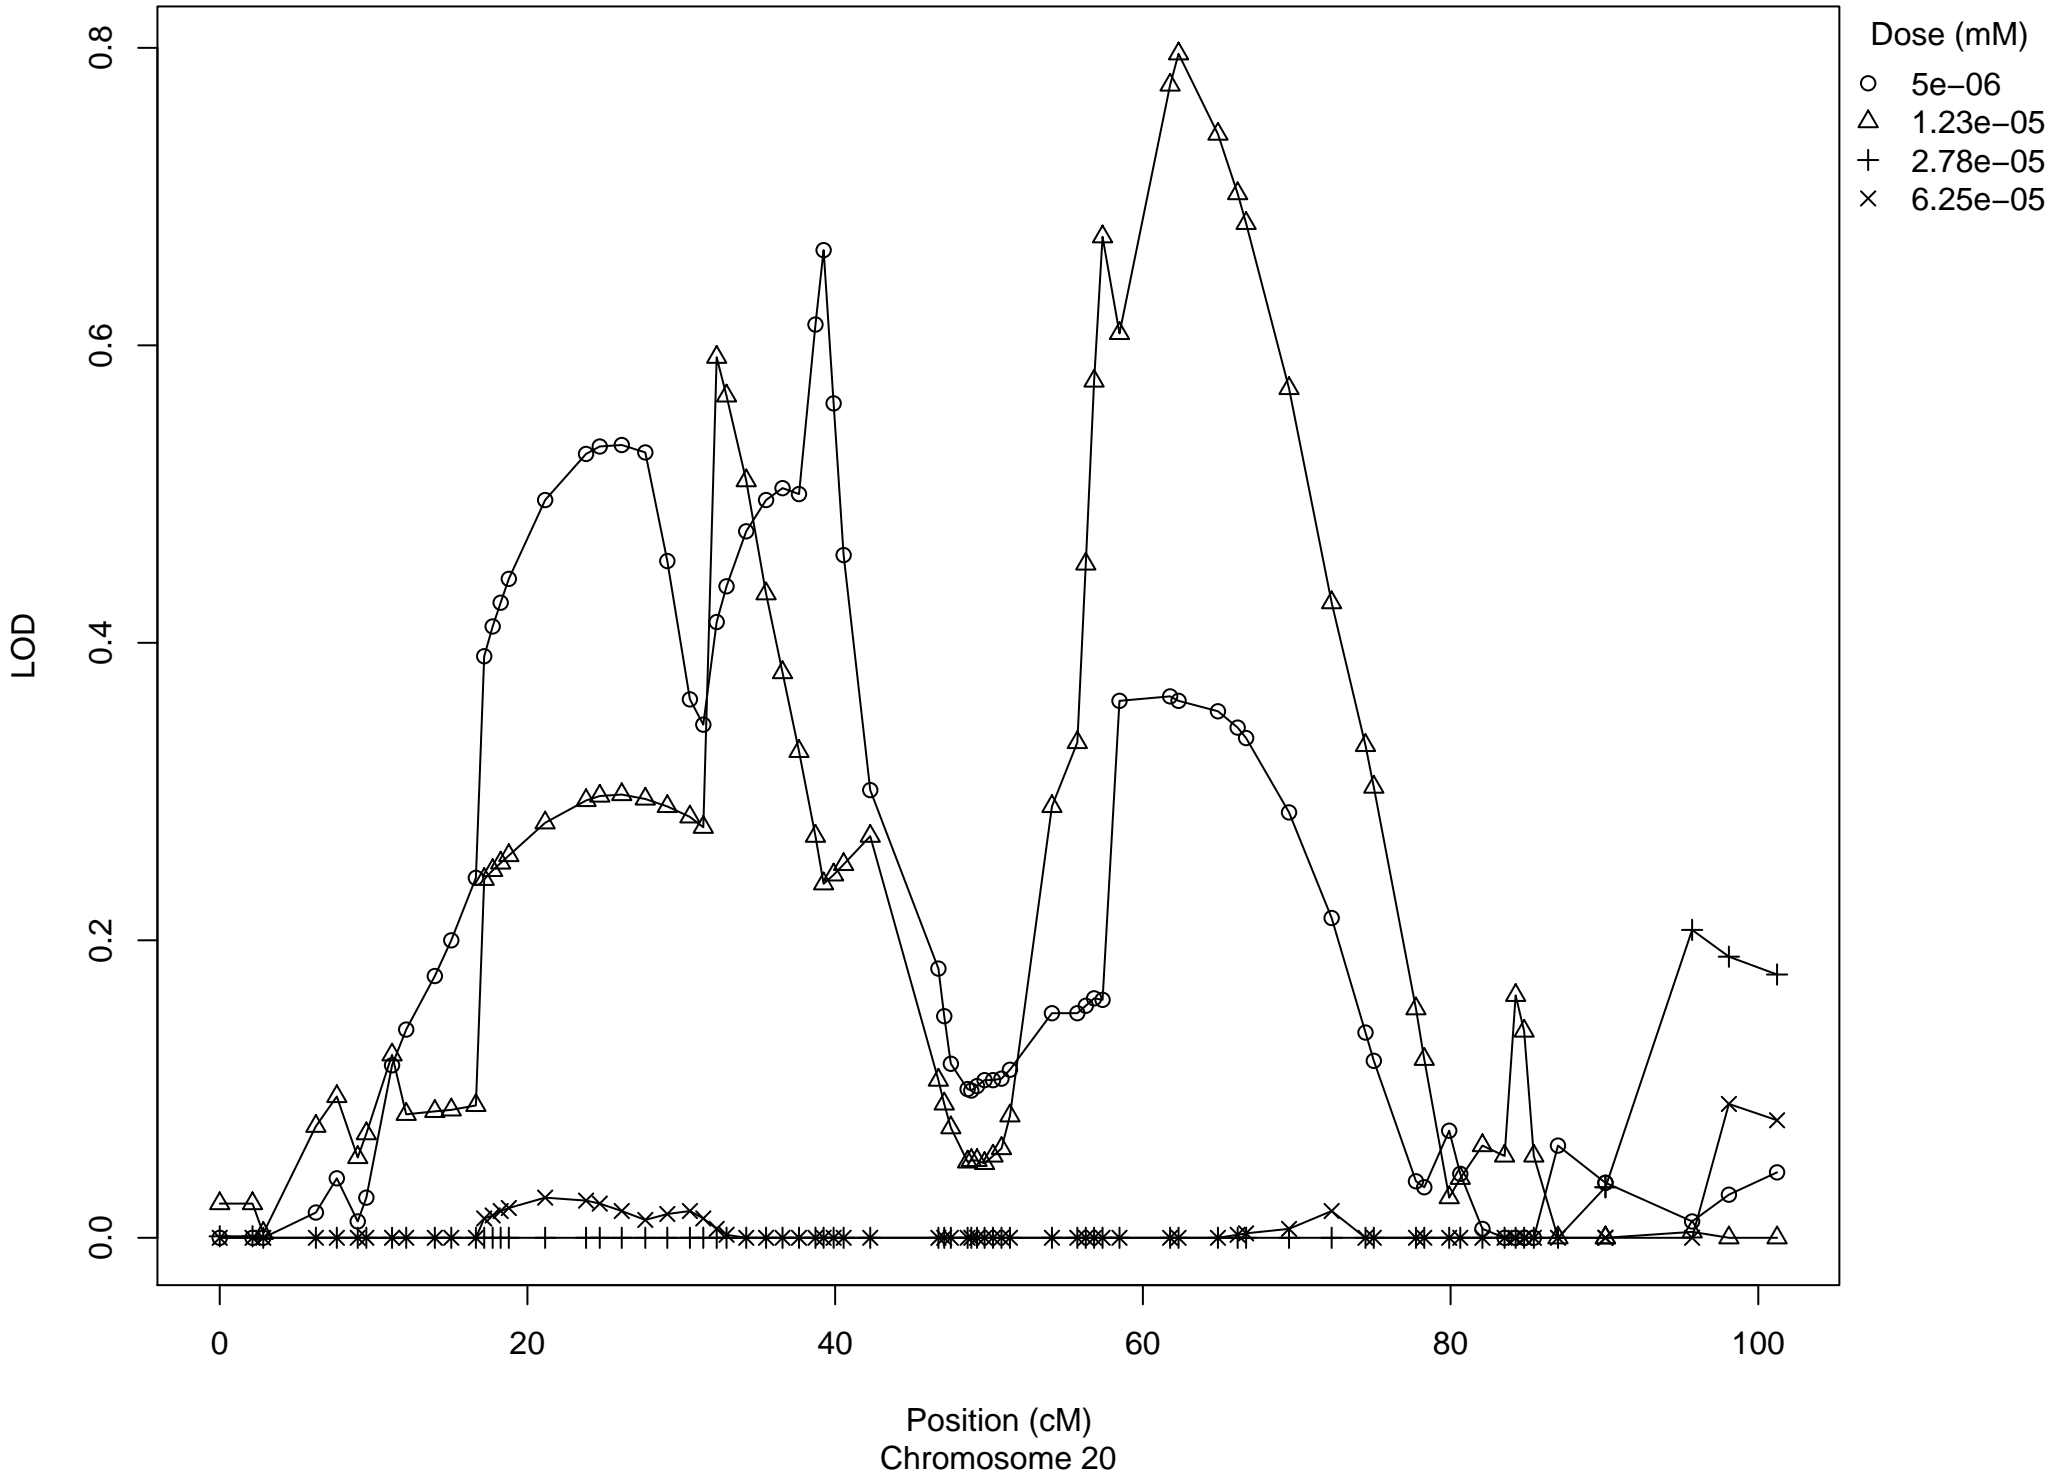

# Idarubicin hydrochloride (Ida)

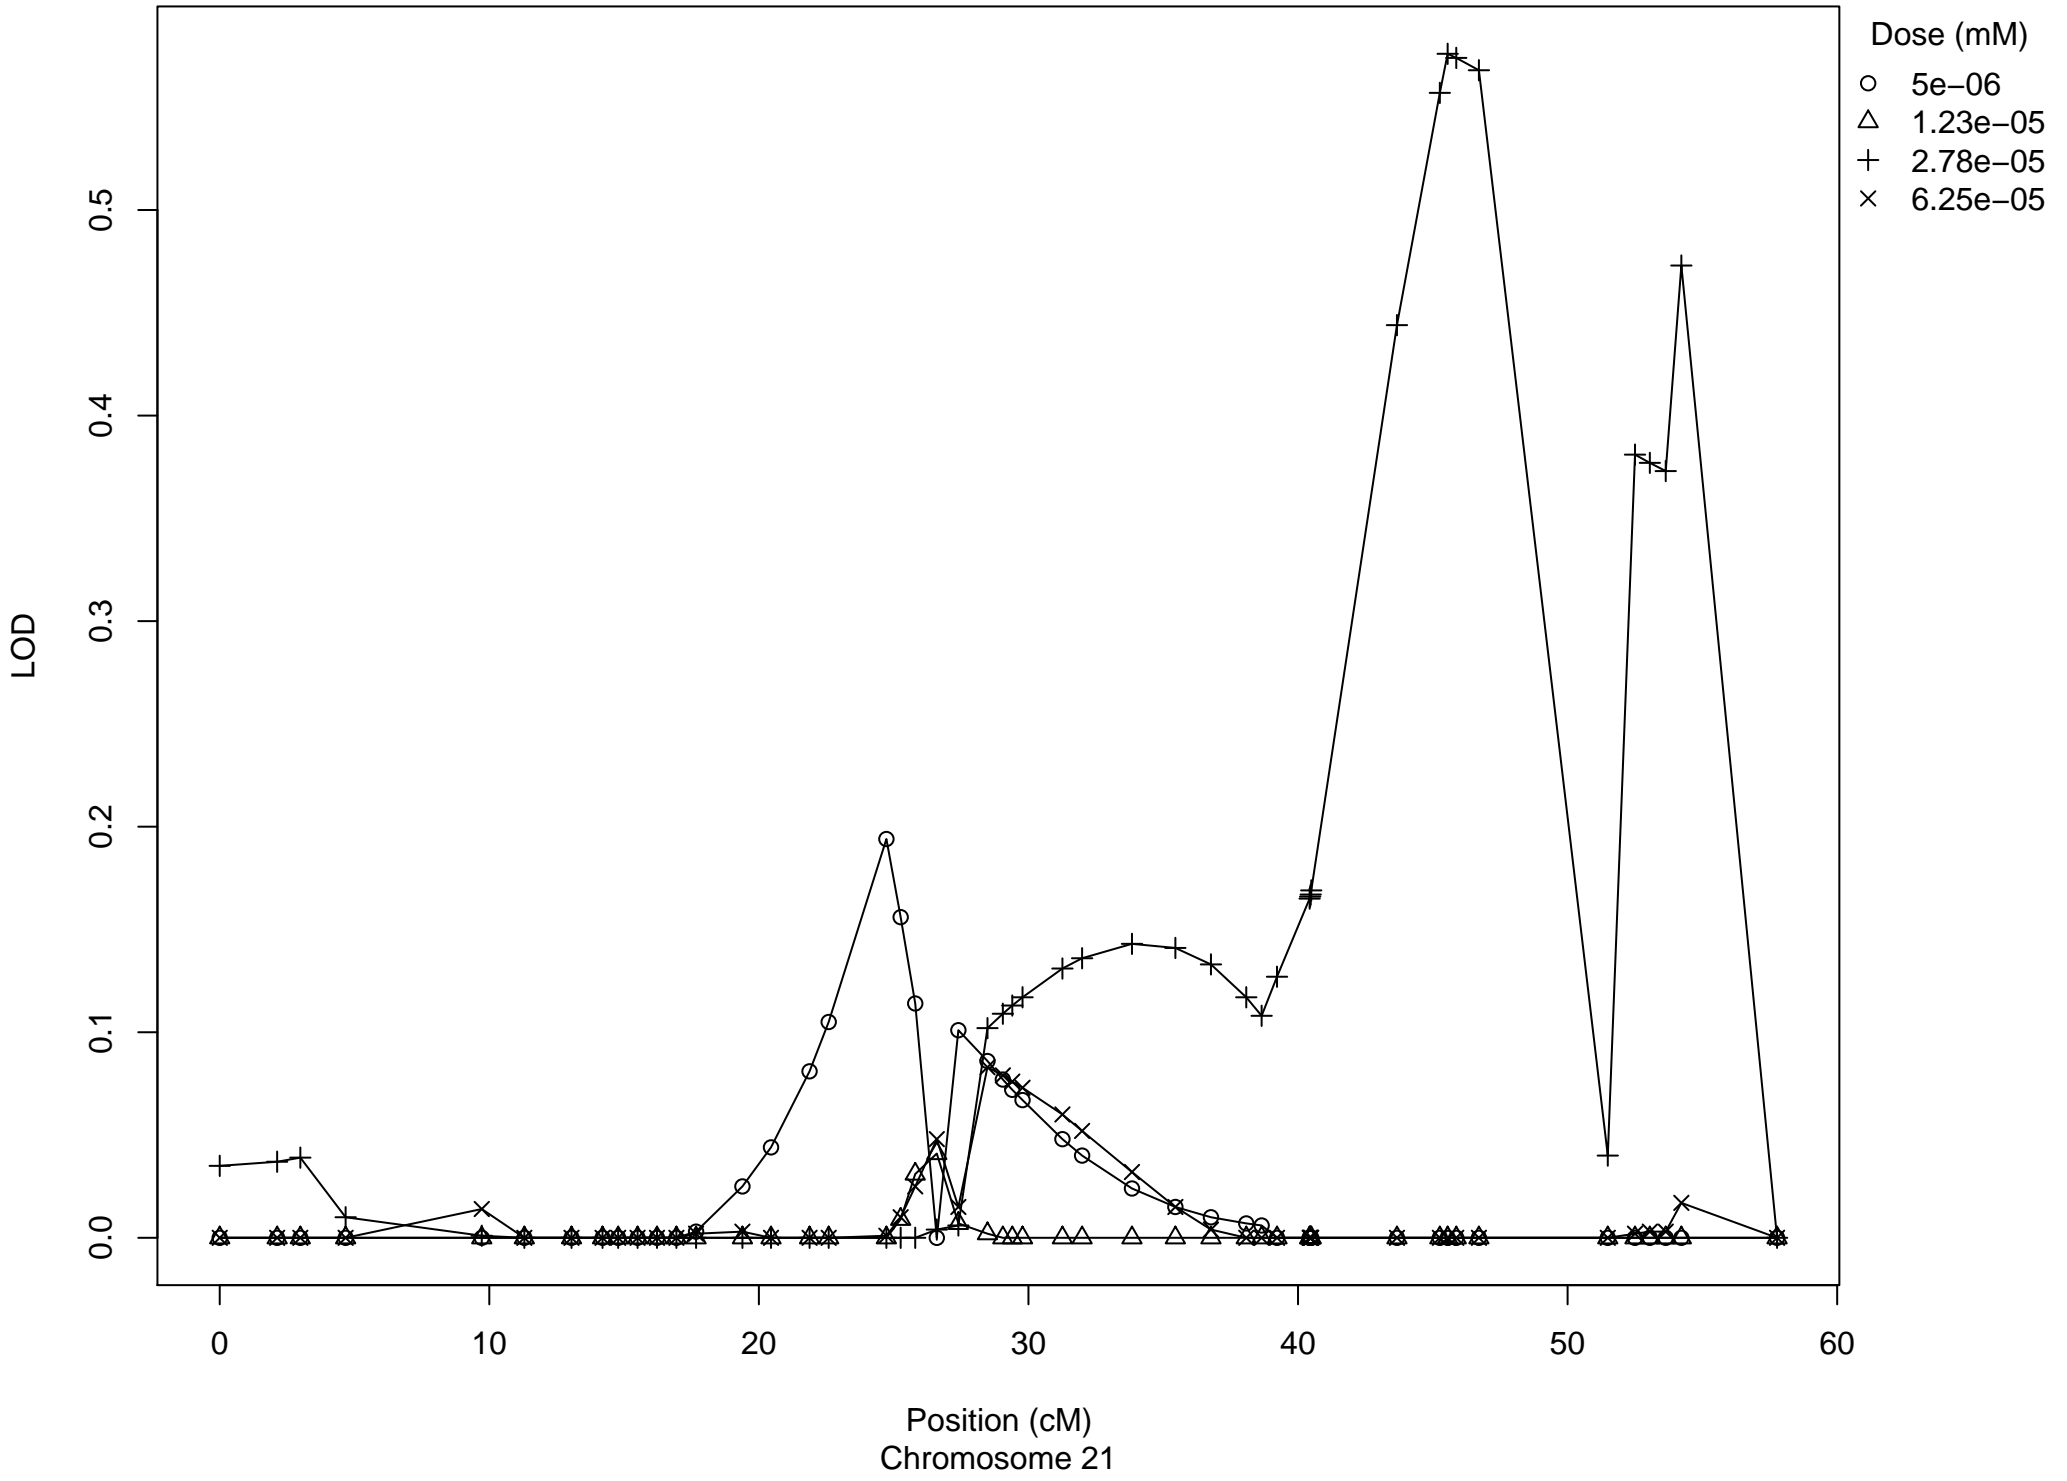

# Idarubicin hydrochloride (Ida)

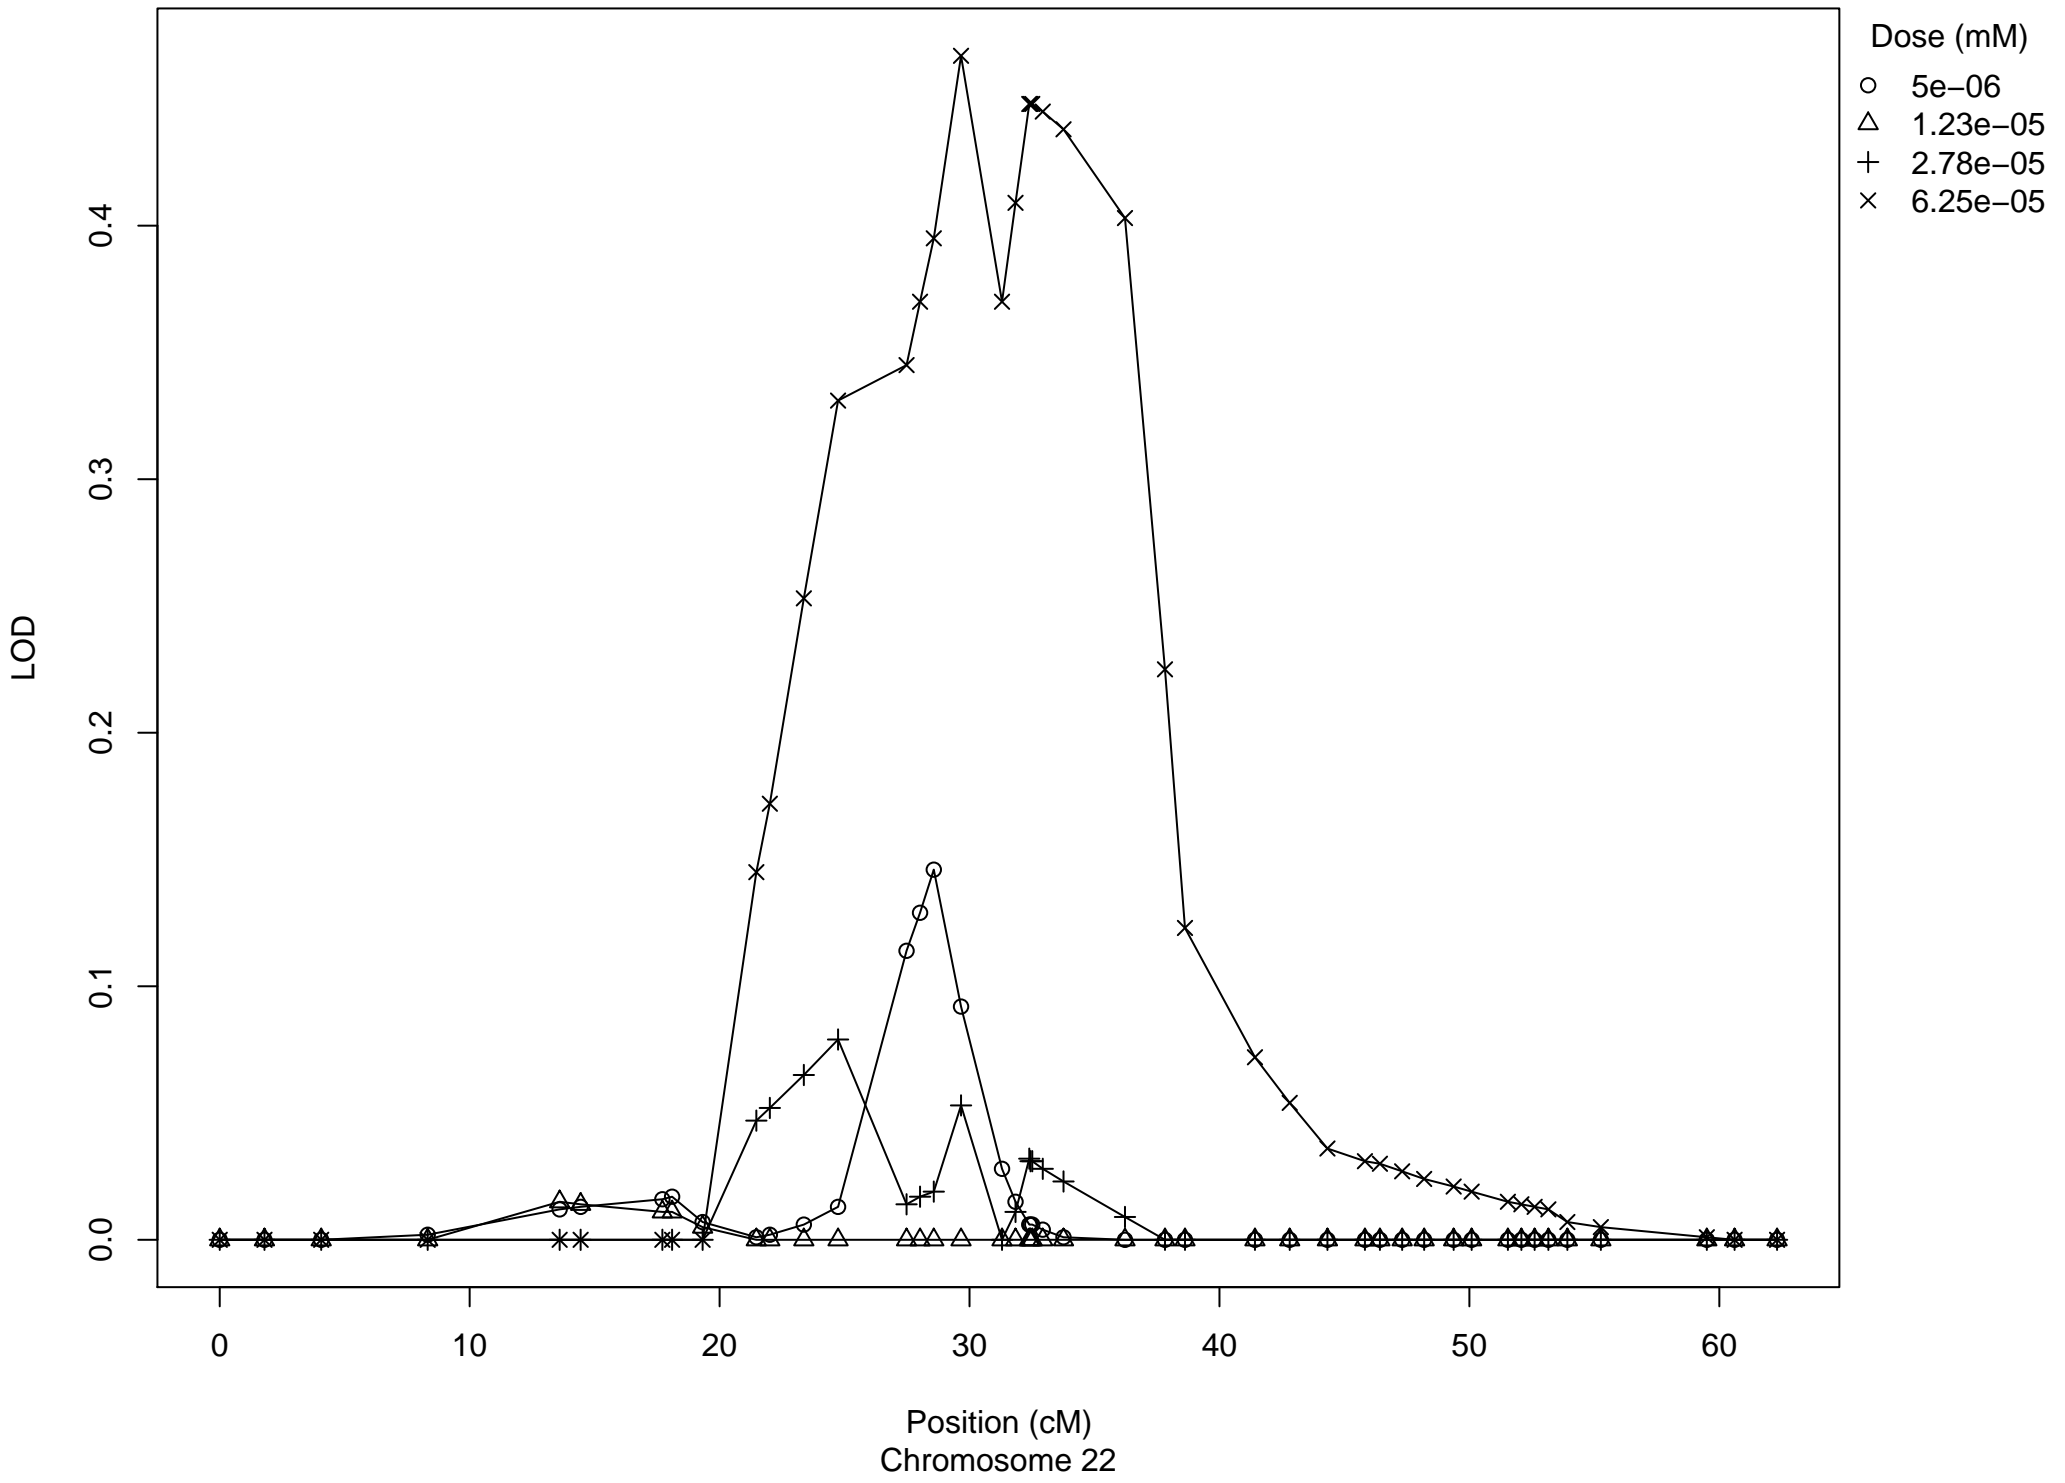

# Mitomycin C (Mitom)

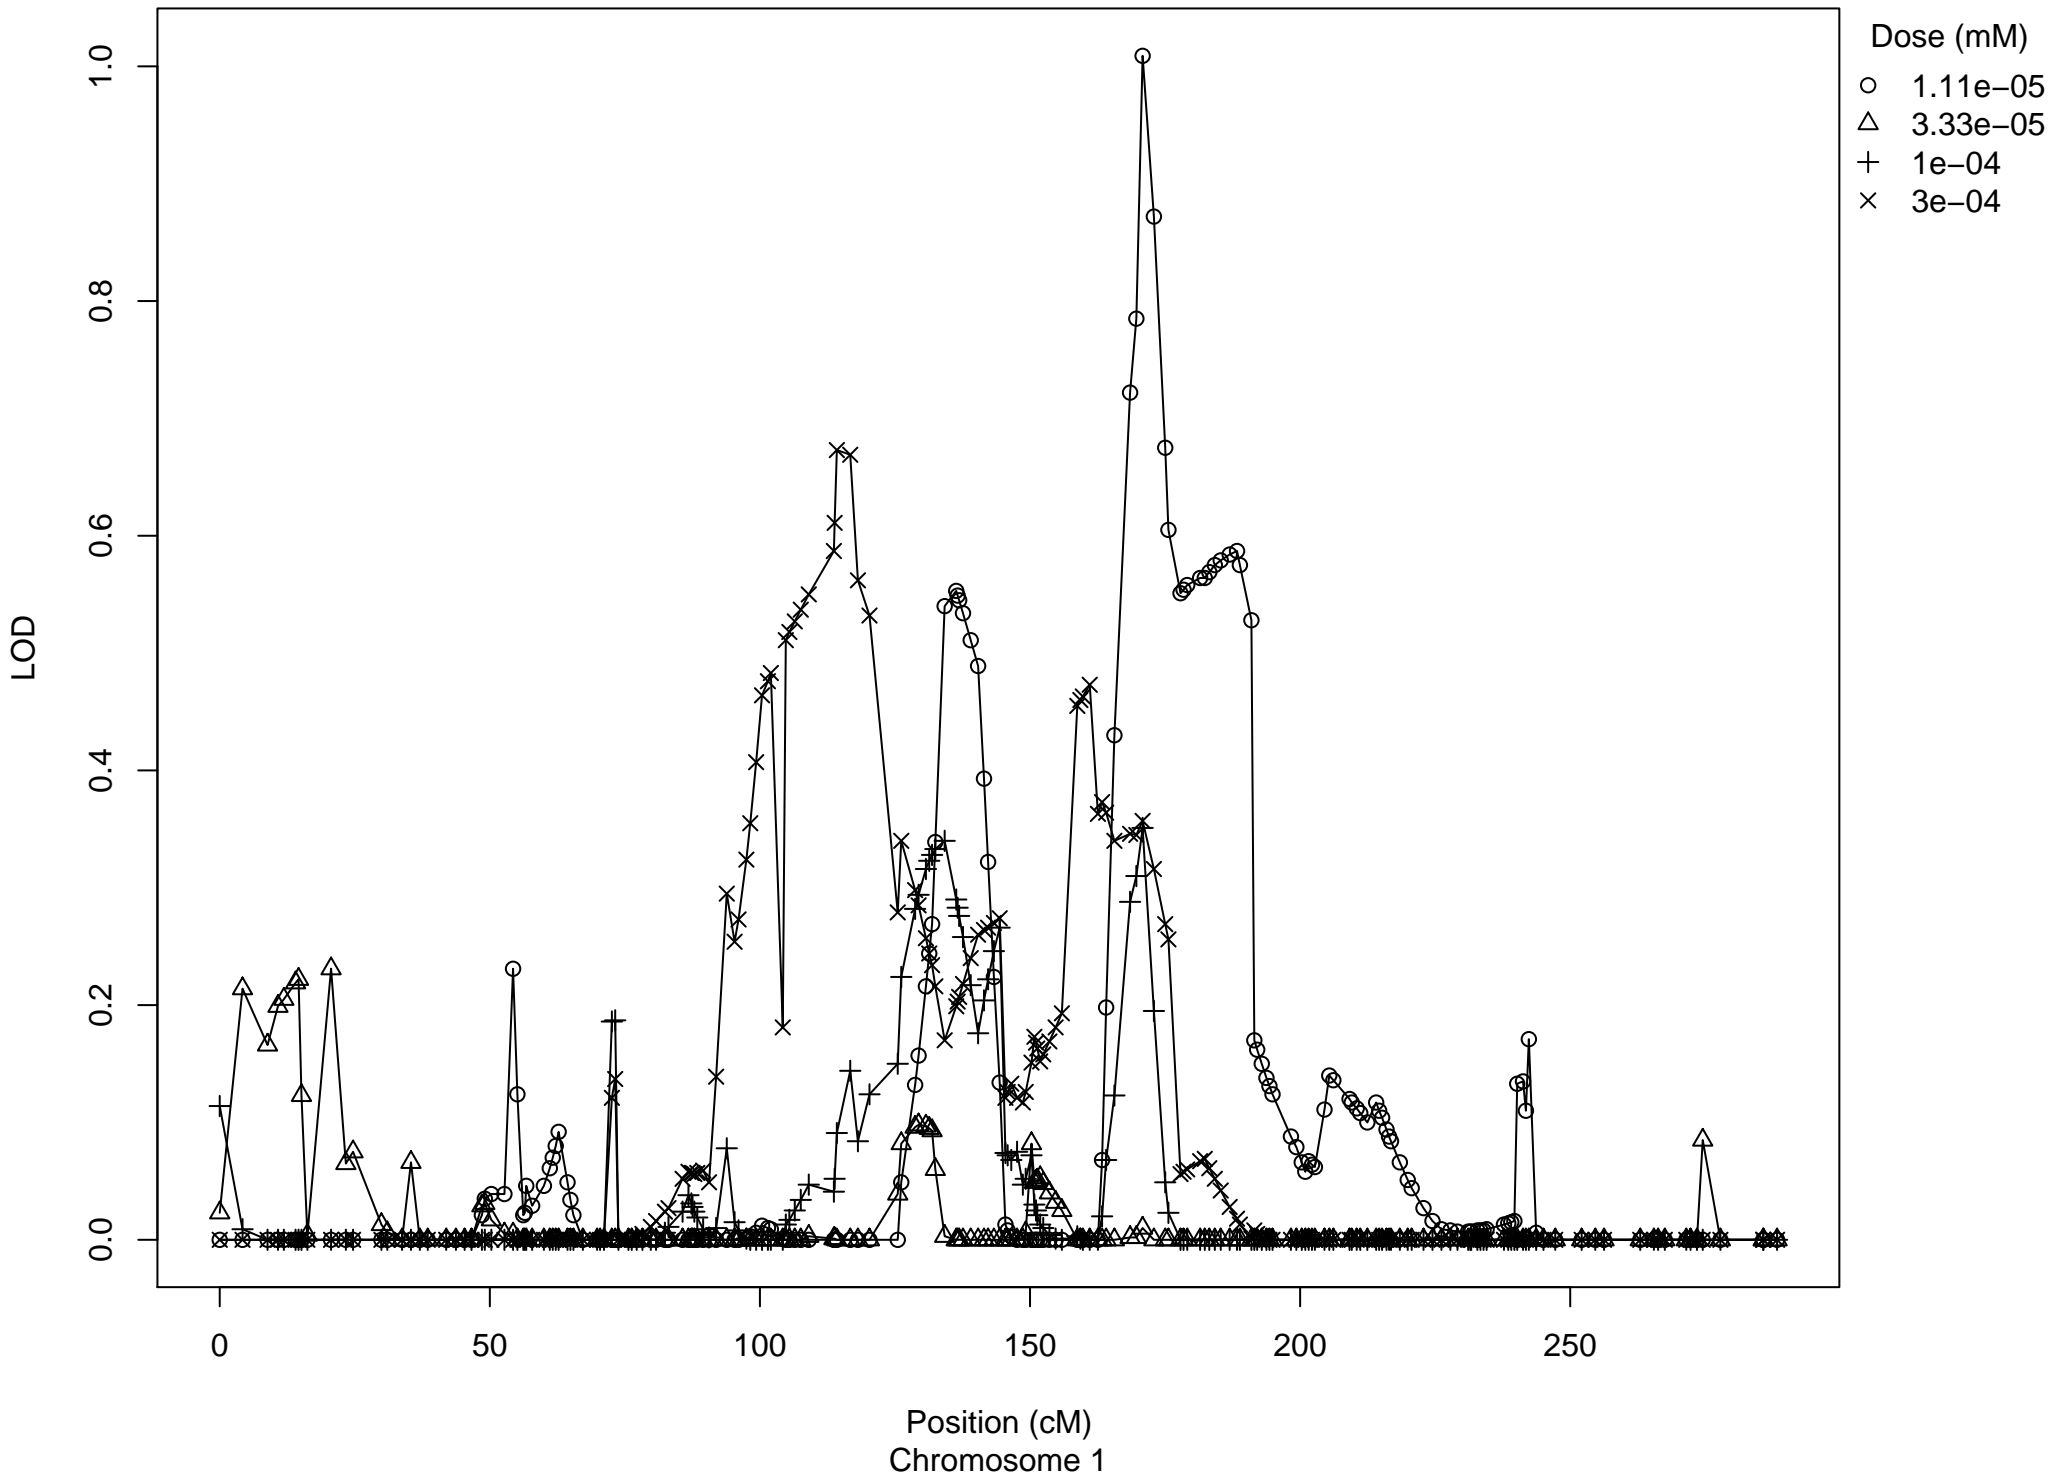

# Mitomycin C (Mitom)

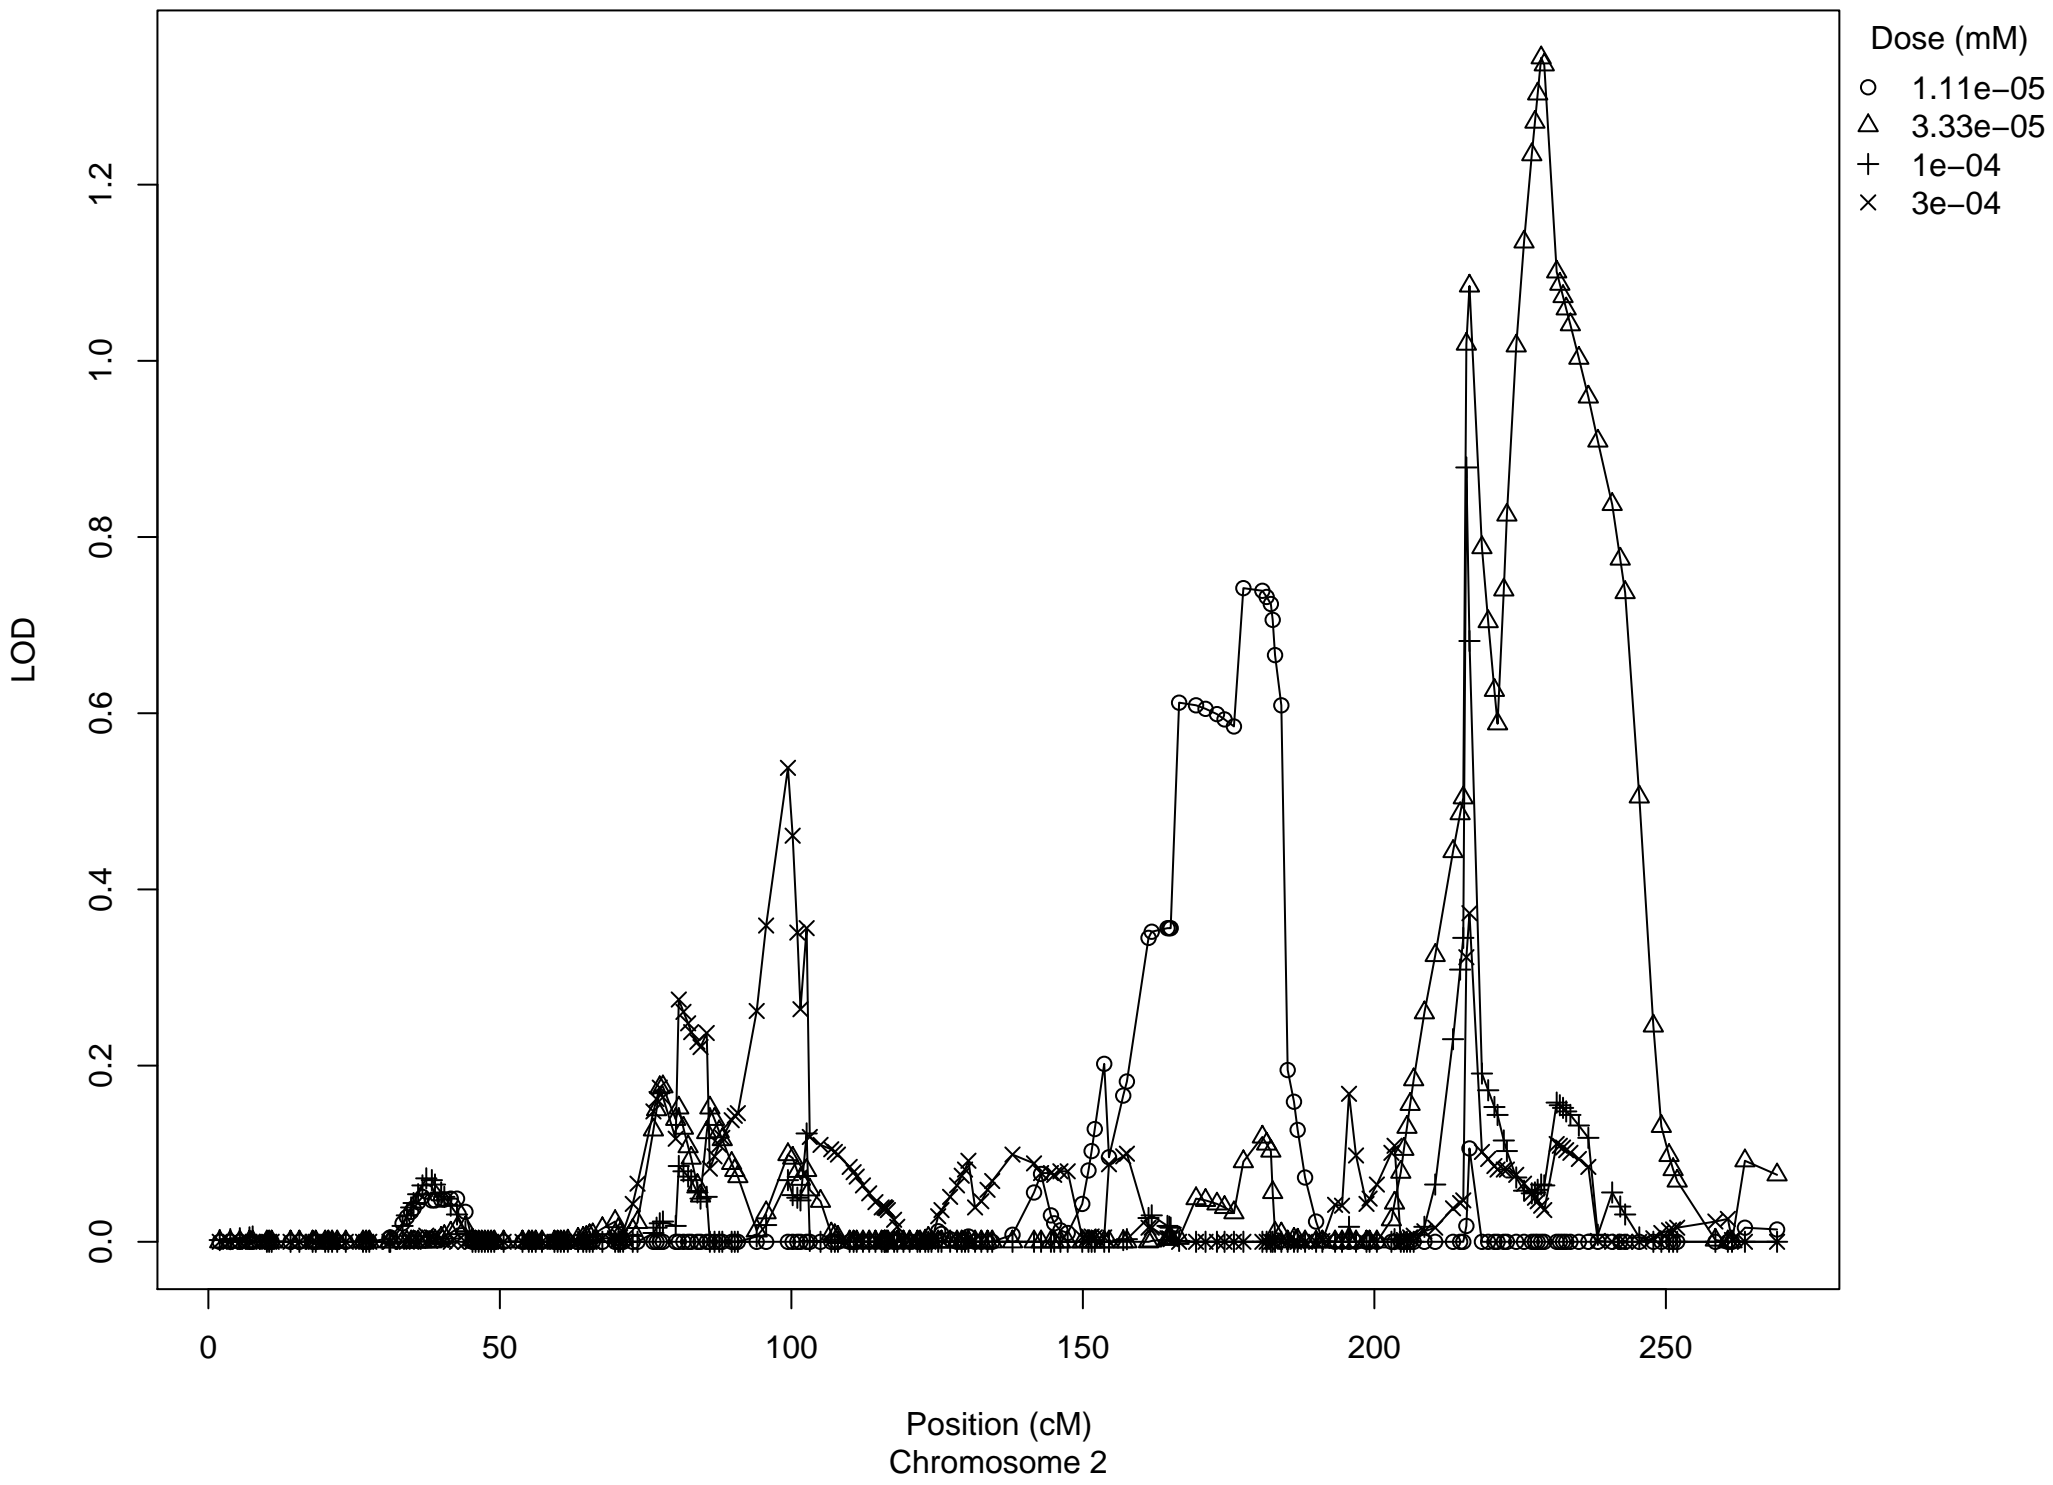

# Mitomycin C (Mitom)

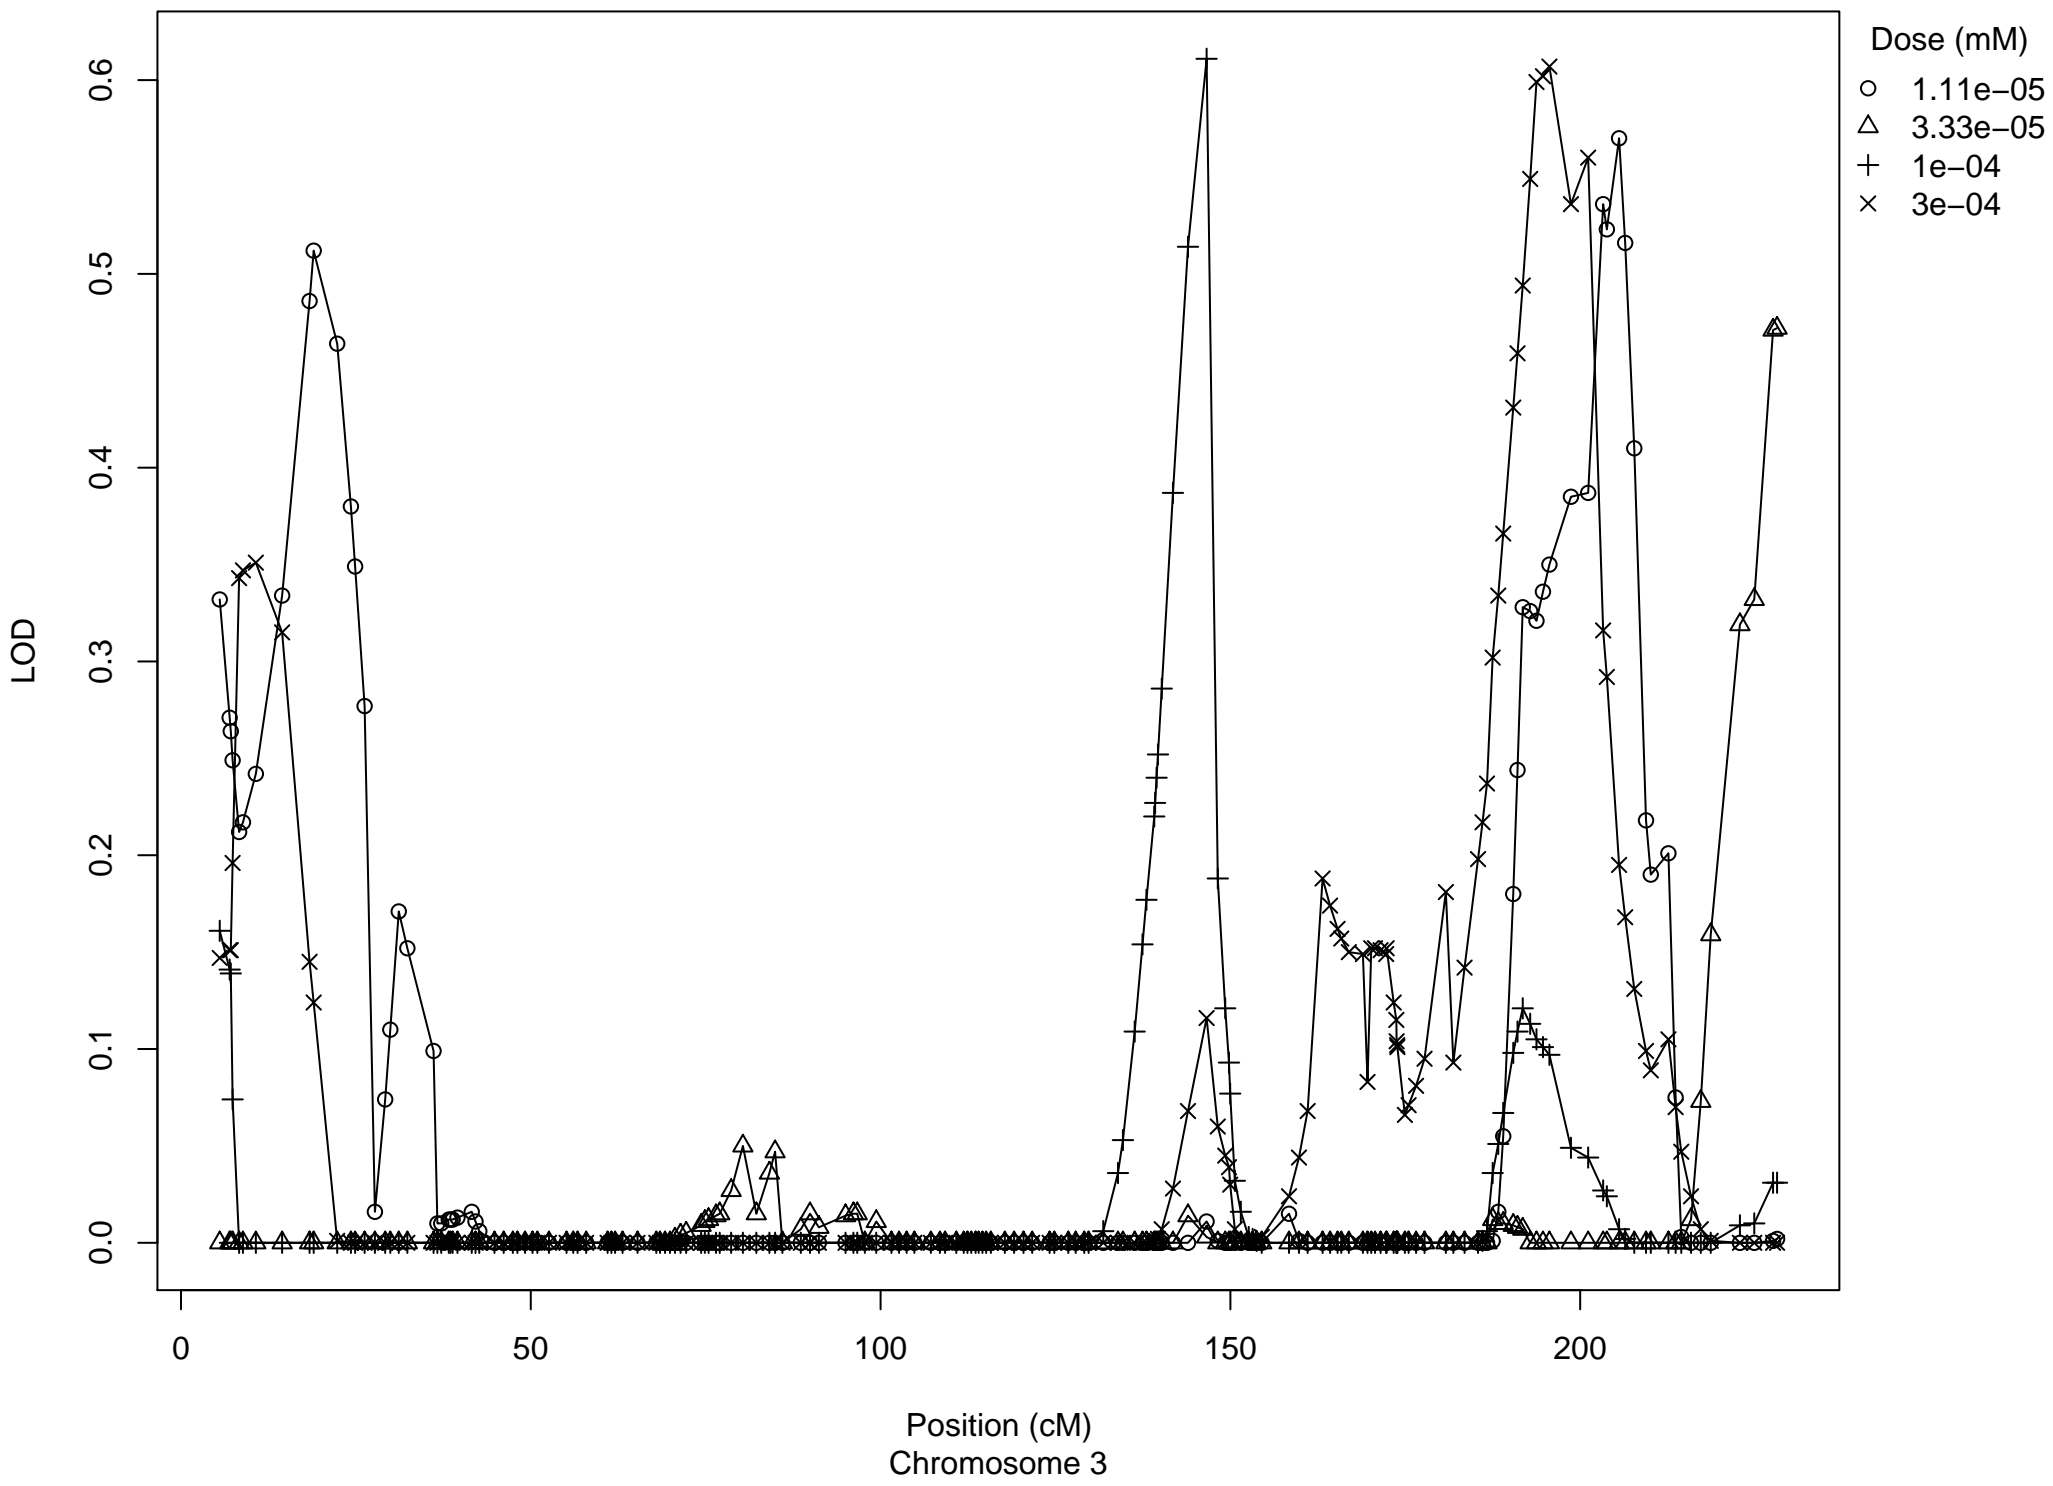

# Mitomycin C (Mitom)

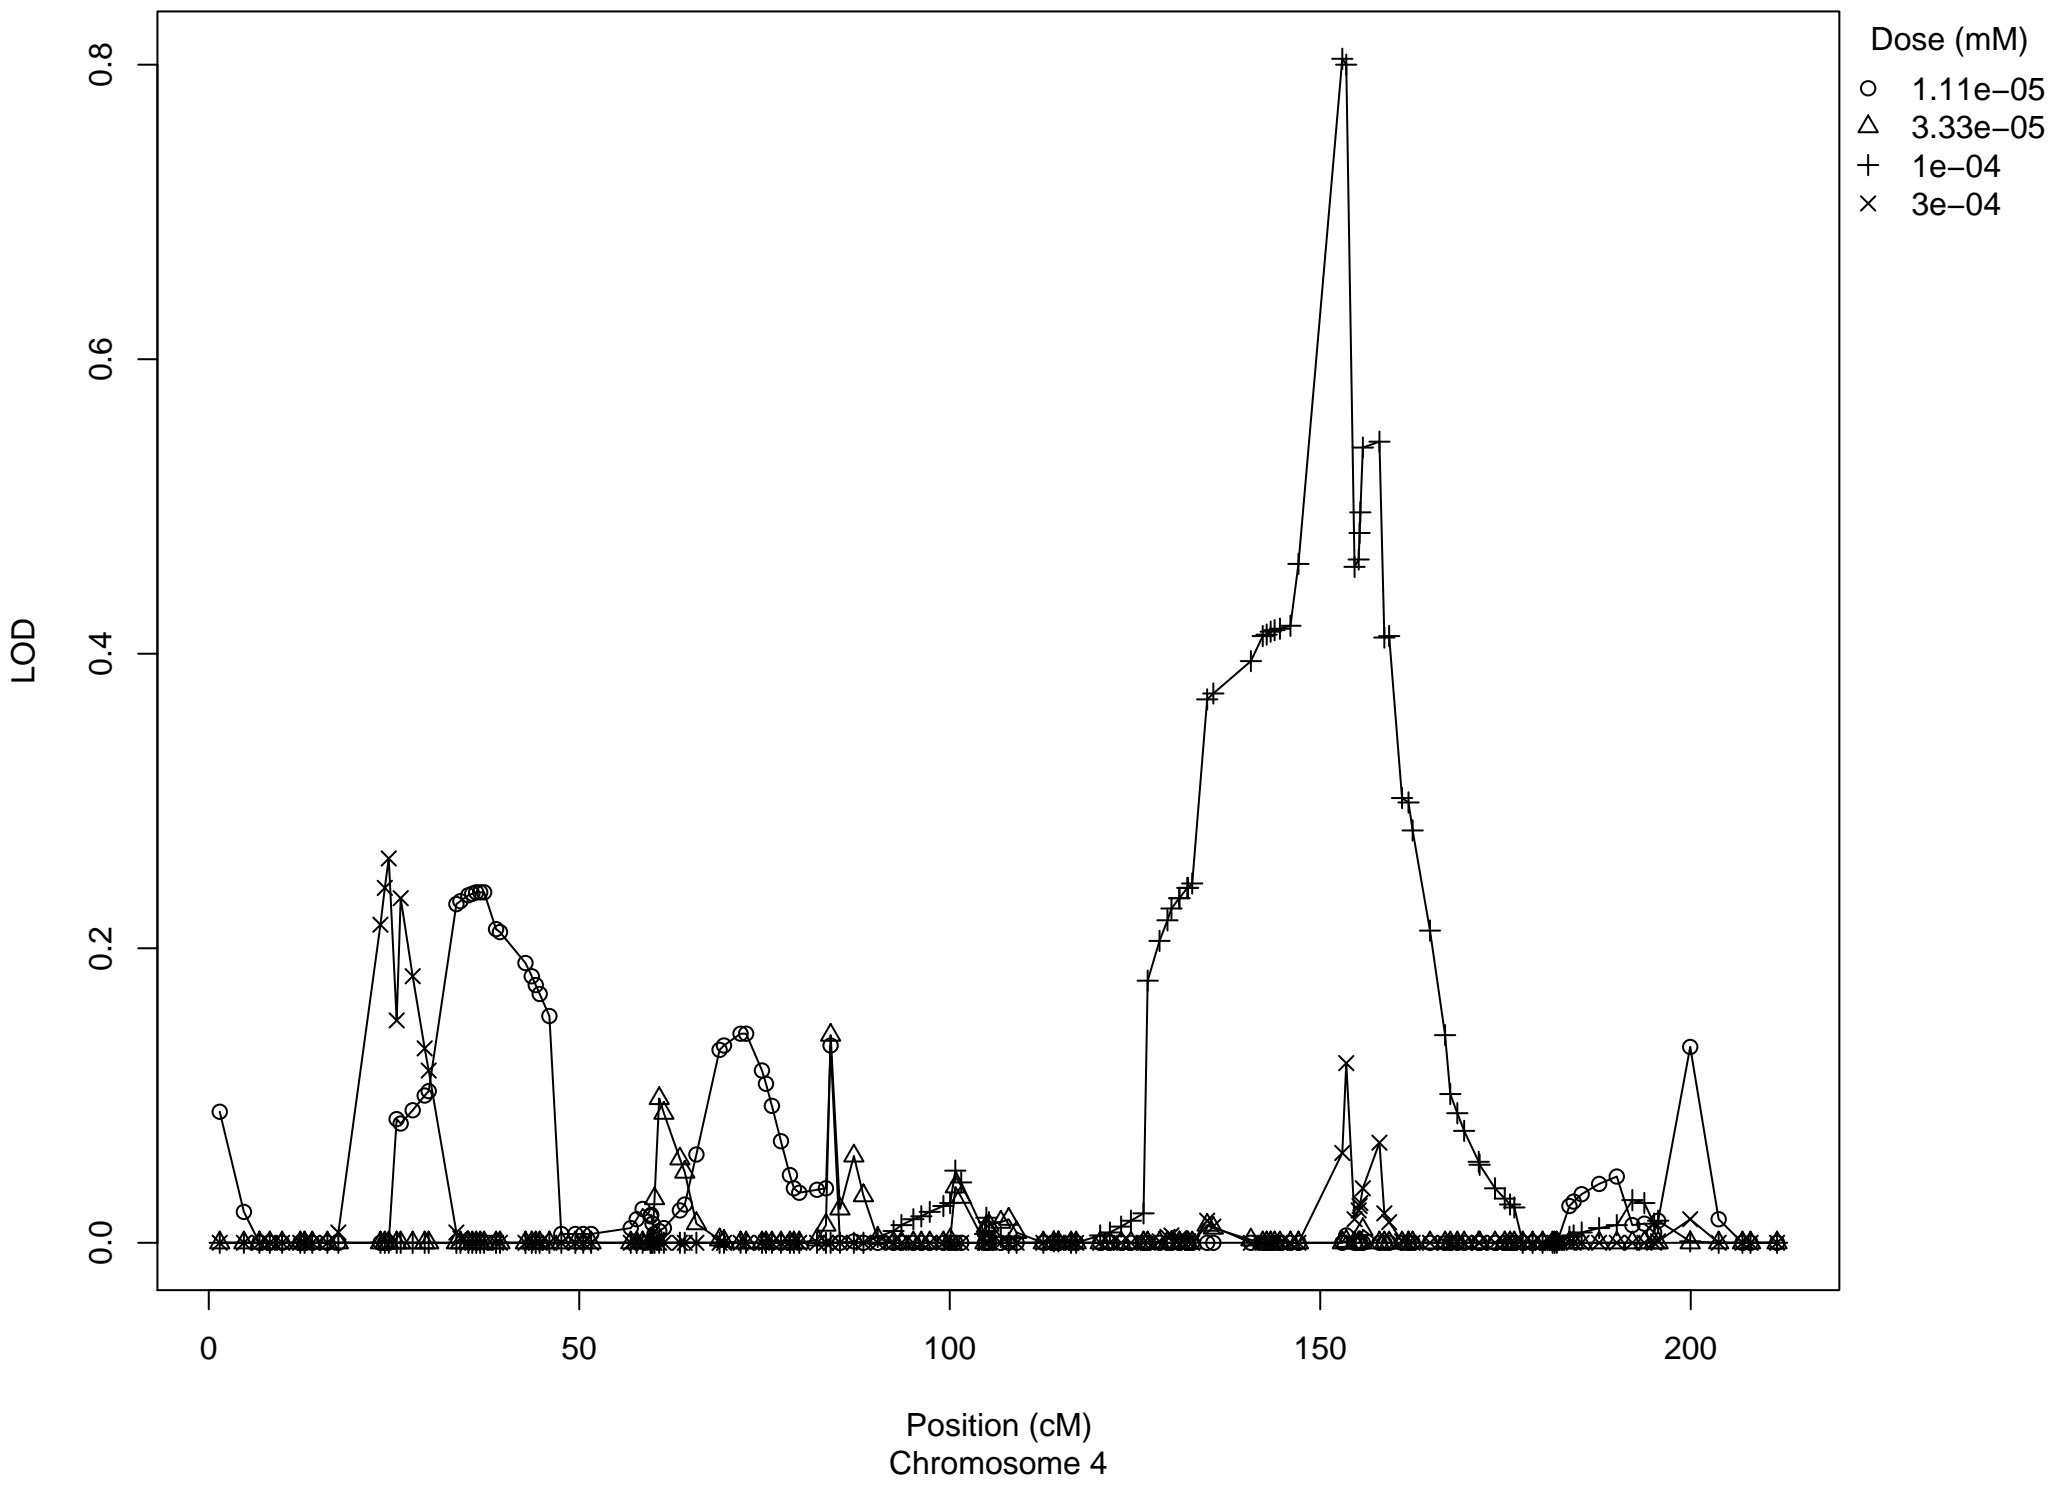



# Mitomycin C (Mitom)

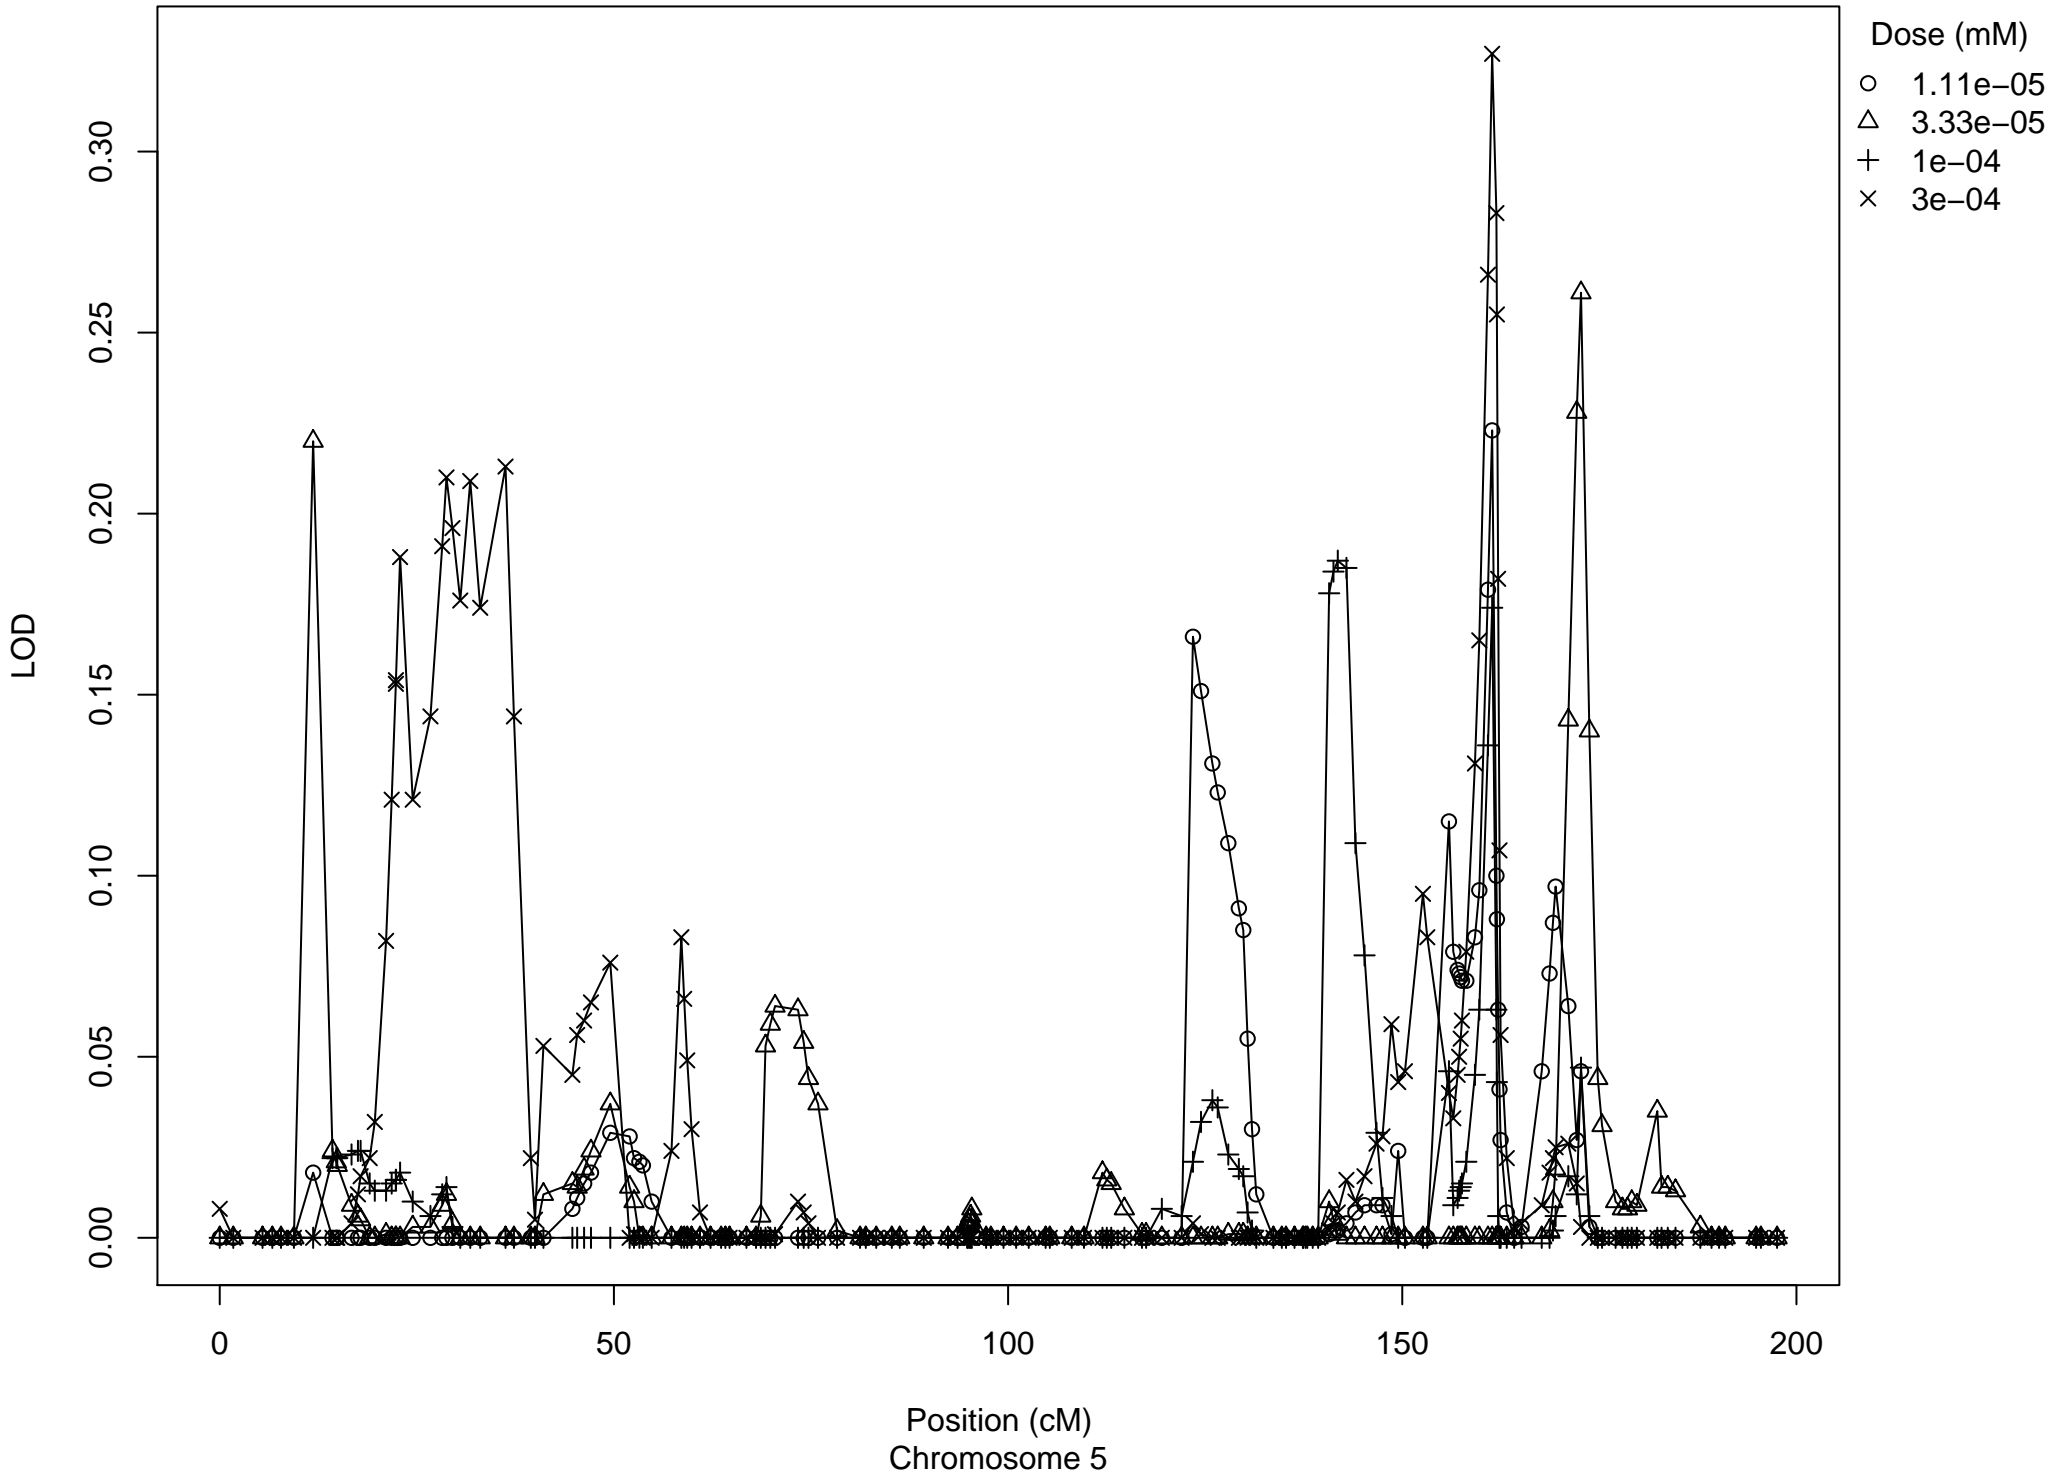

# Mitomycin C (Mitom)

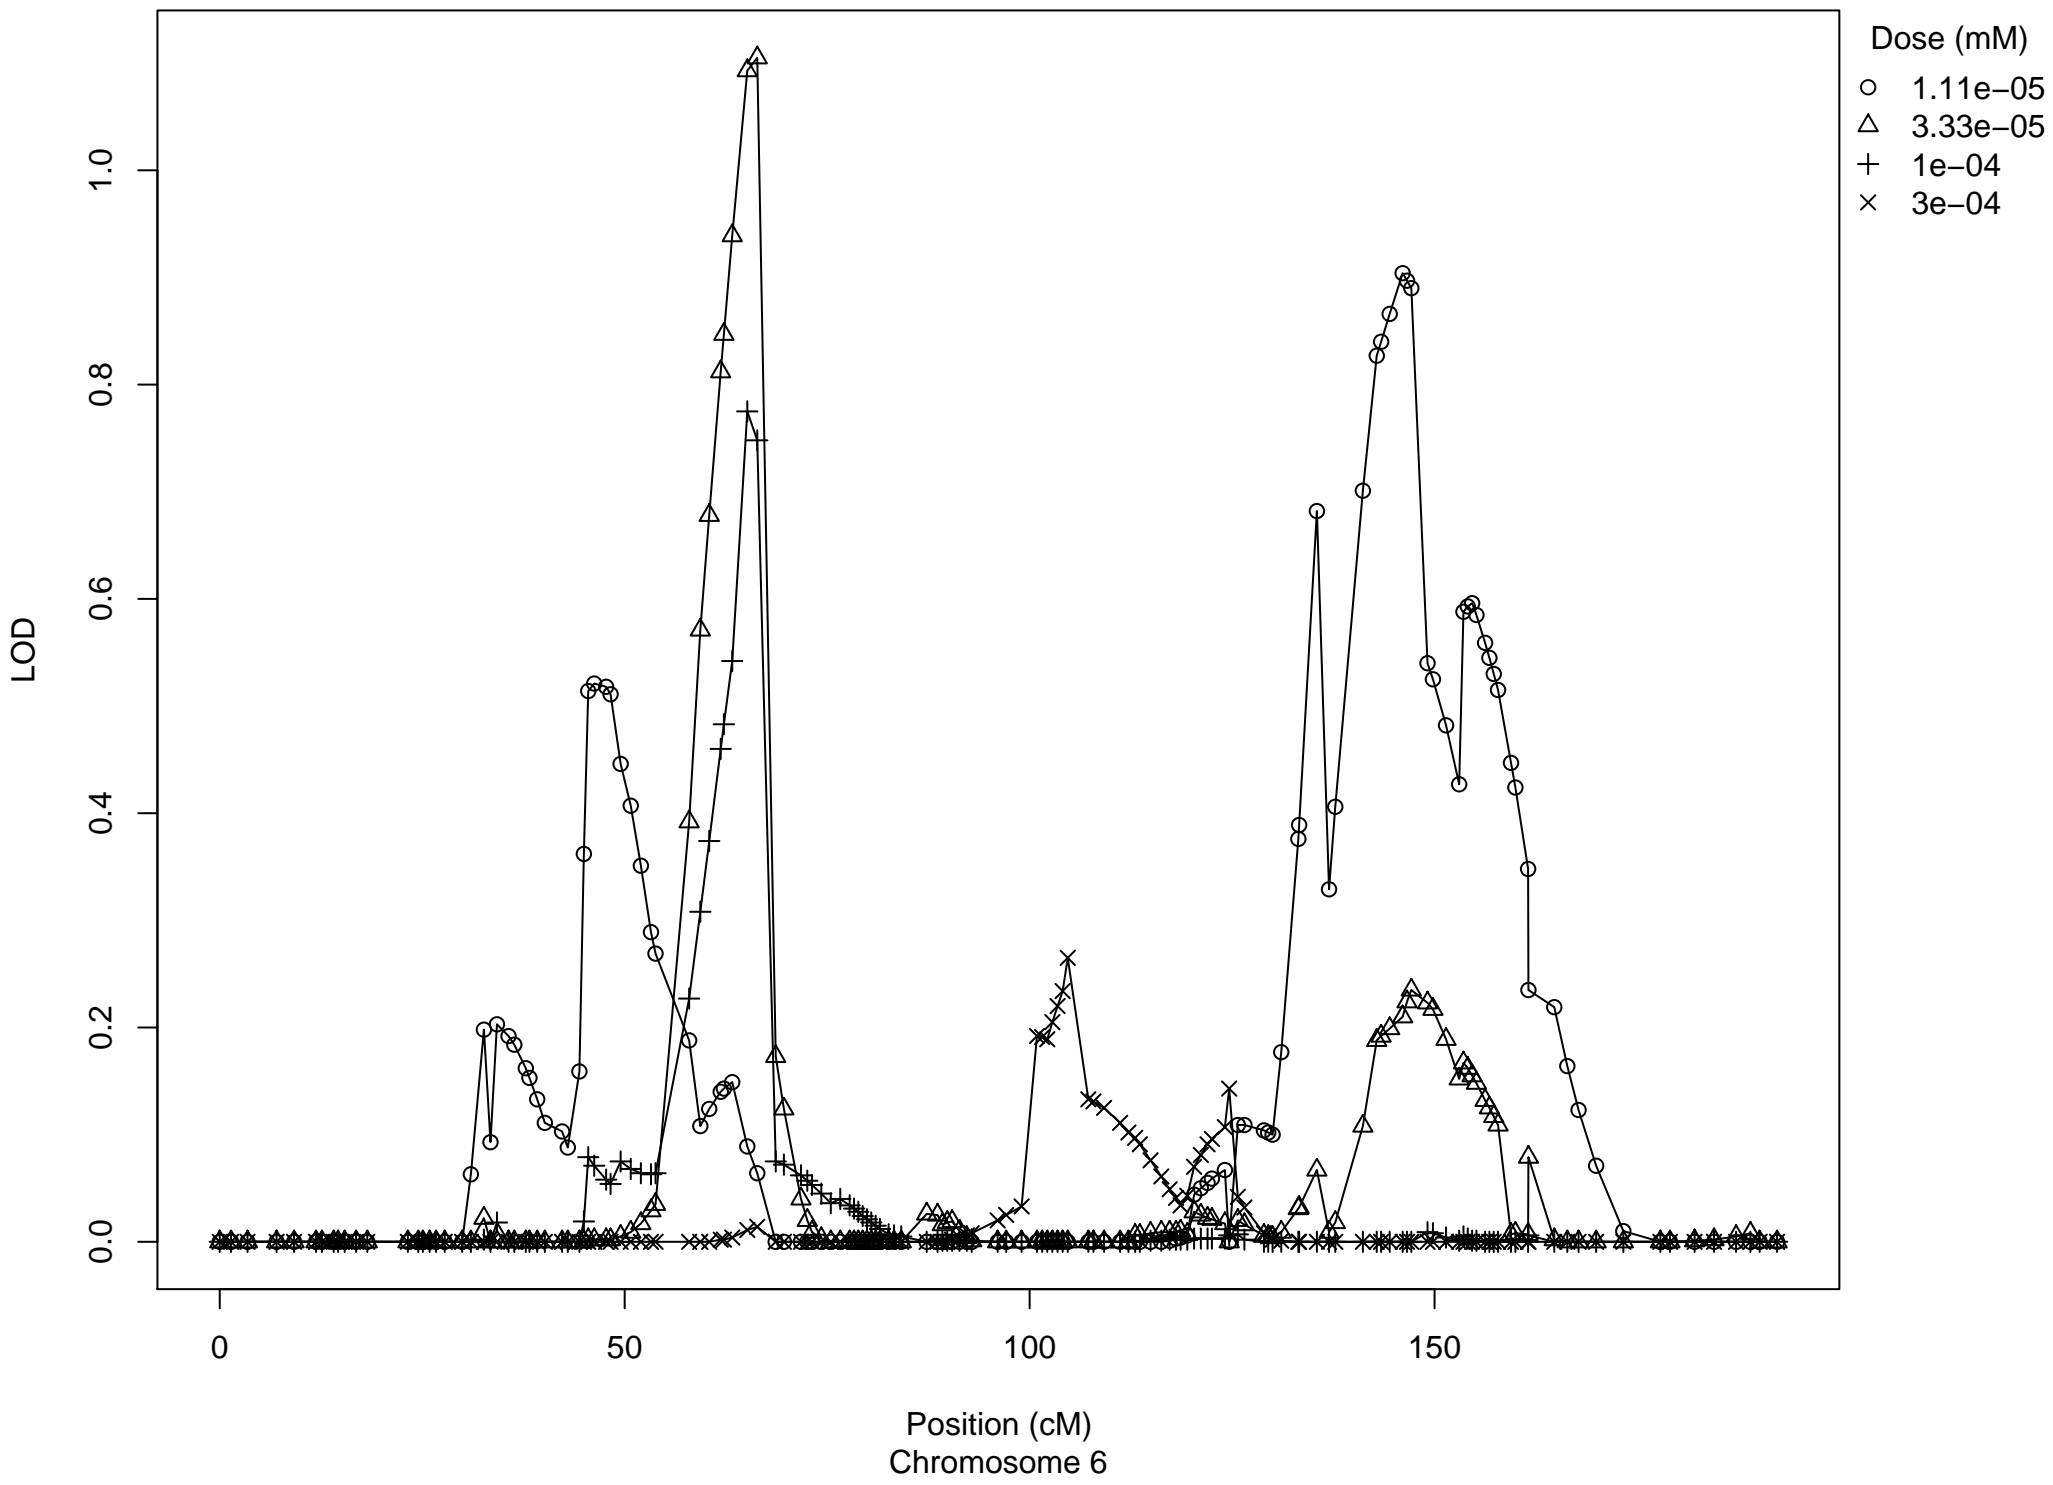

# Mitomycin C (Mitom)

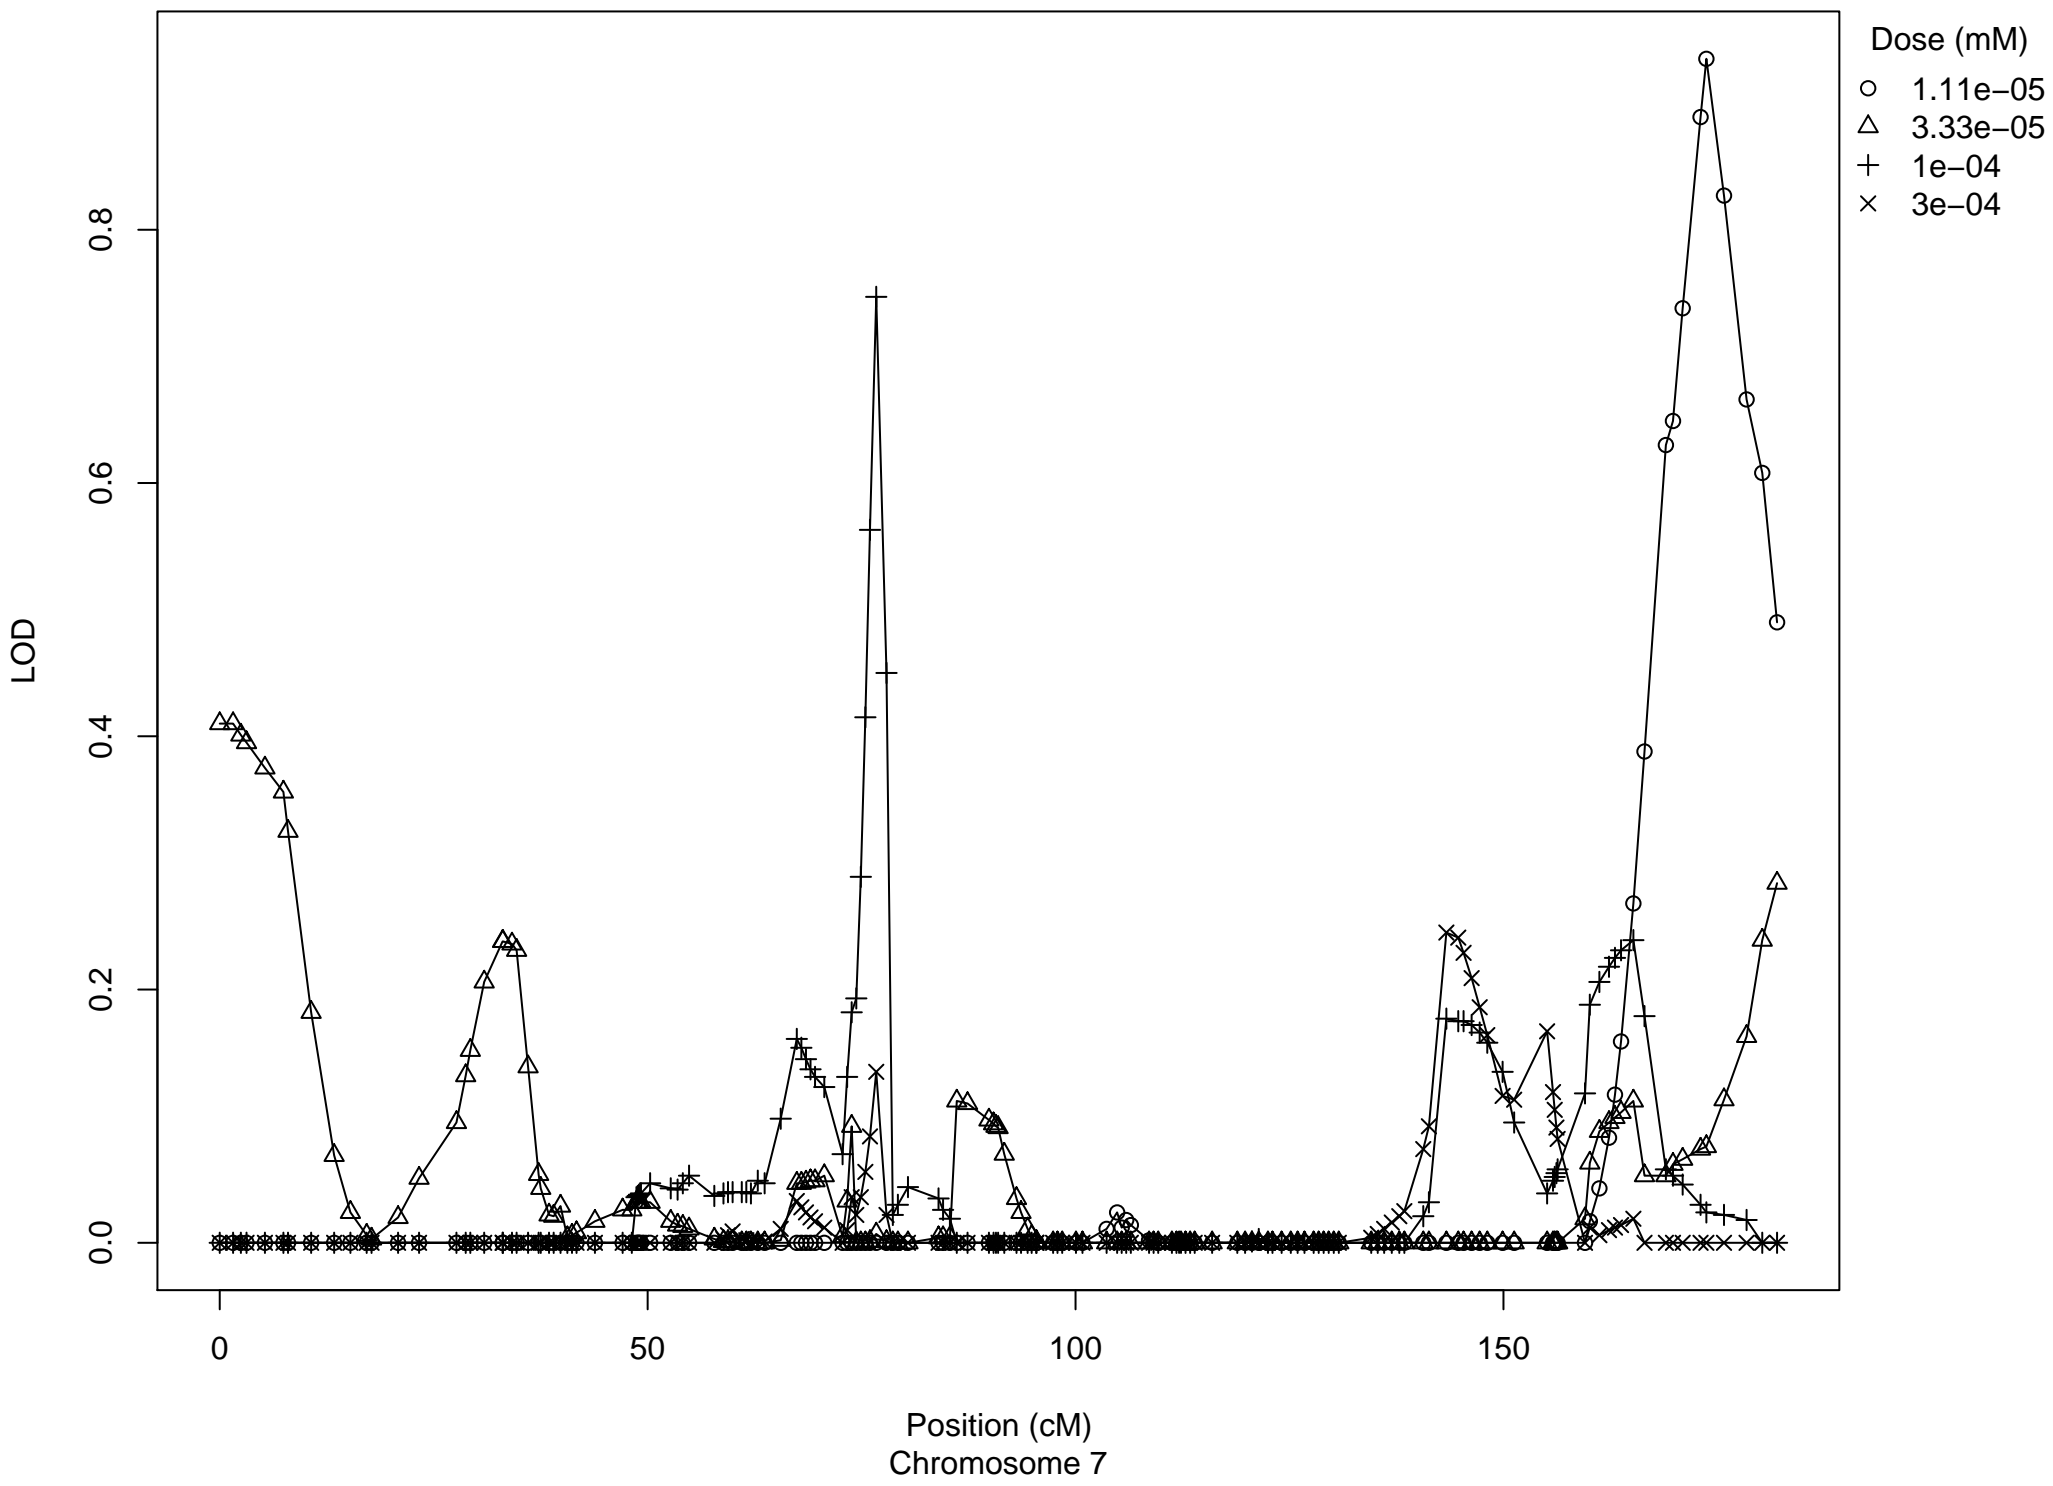

# Mitomycin C (Mitom)

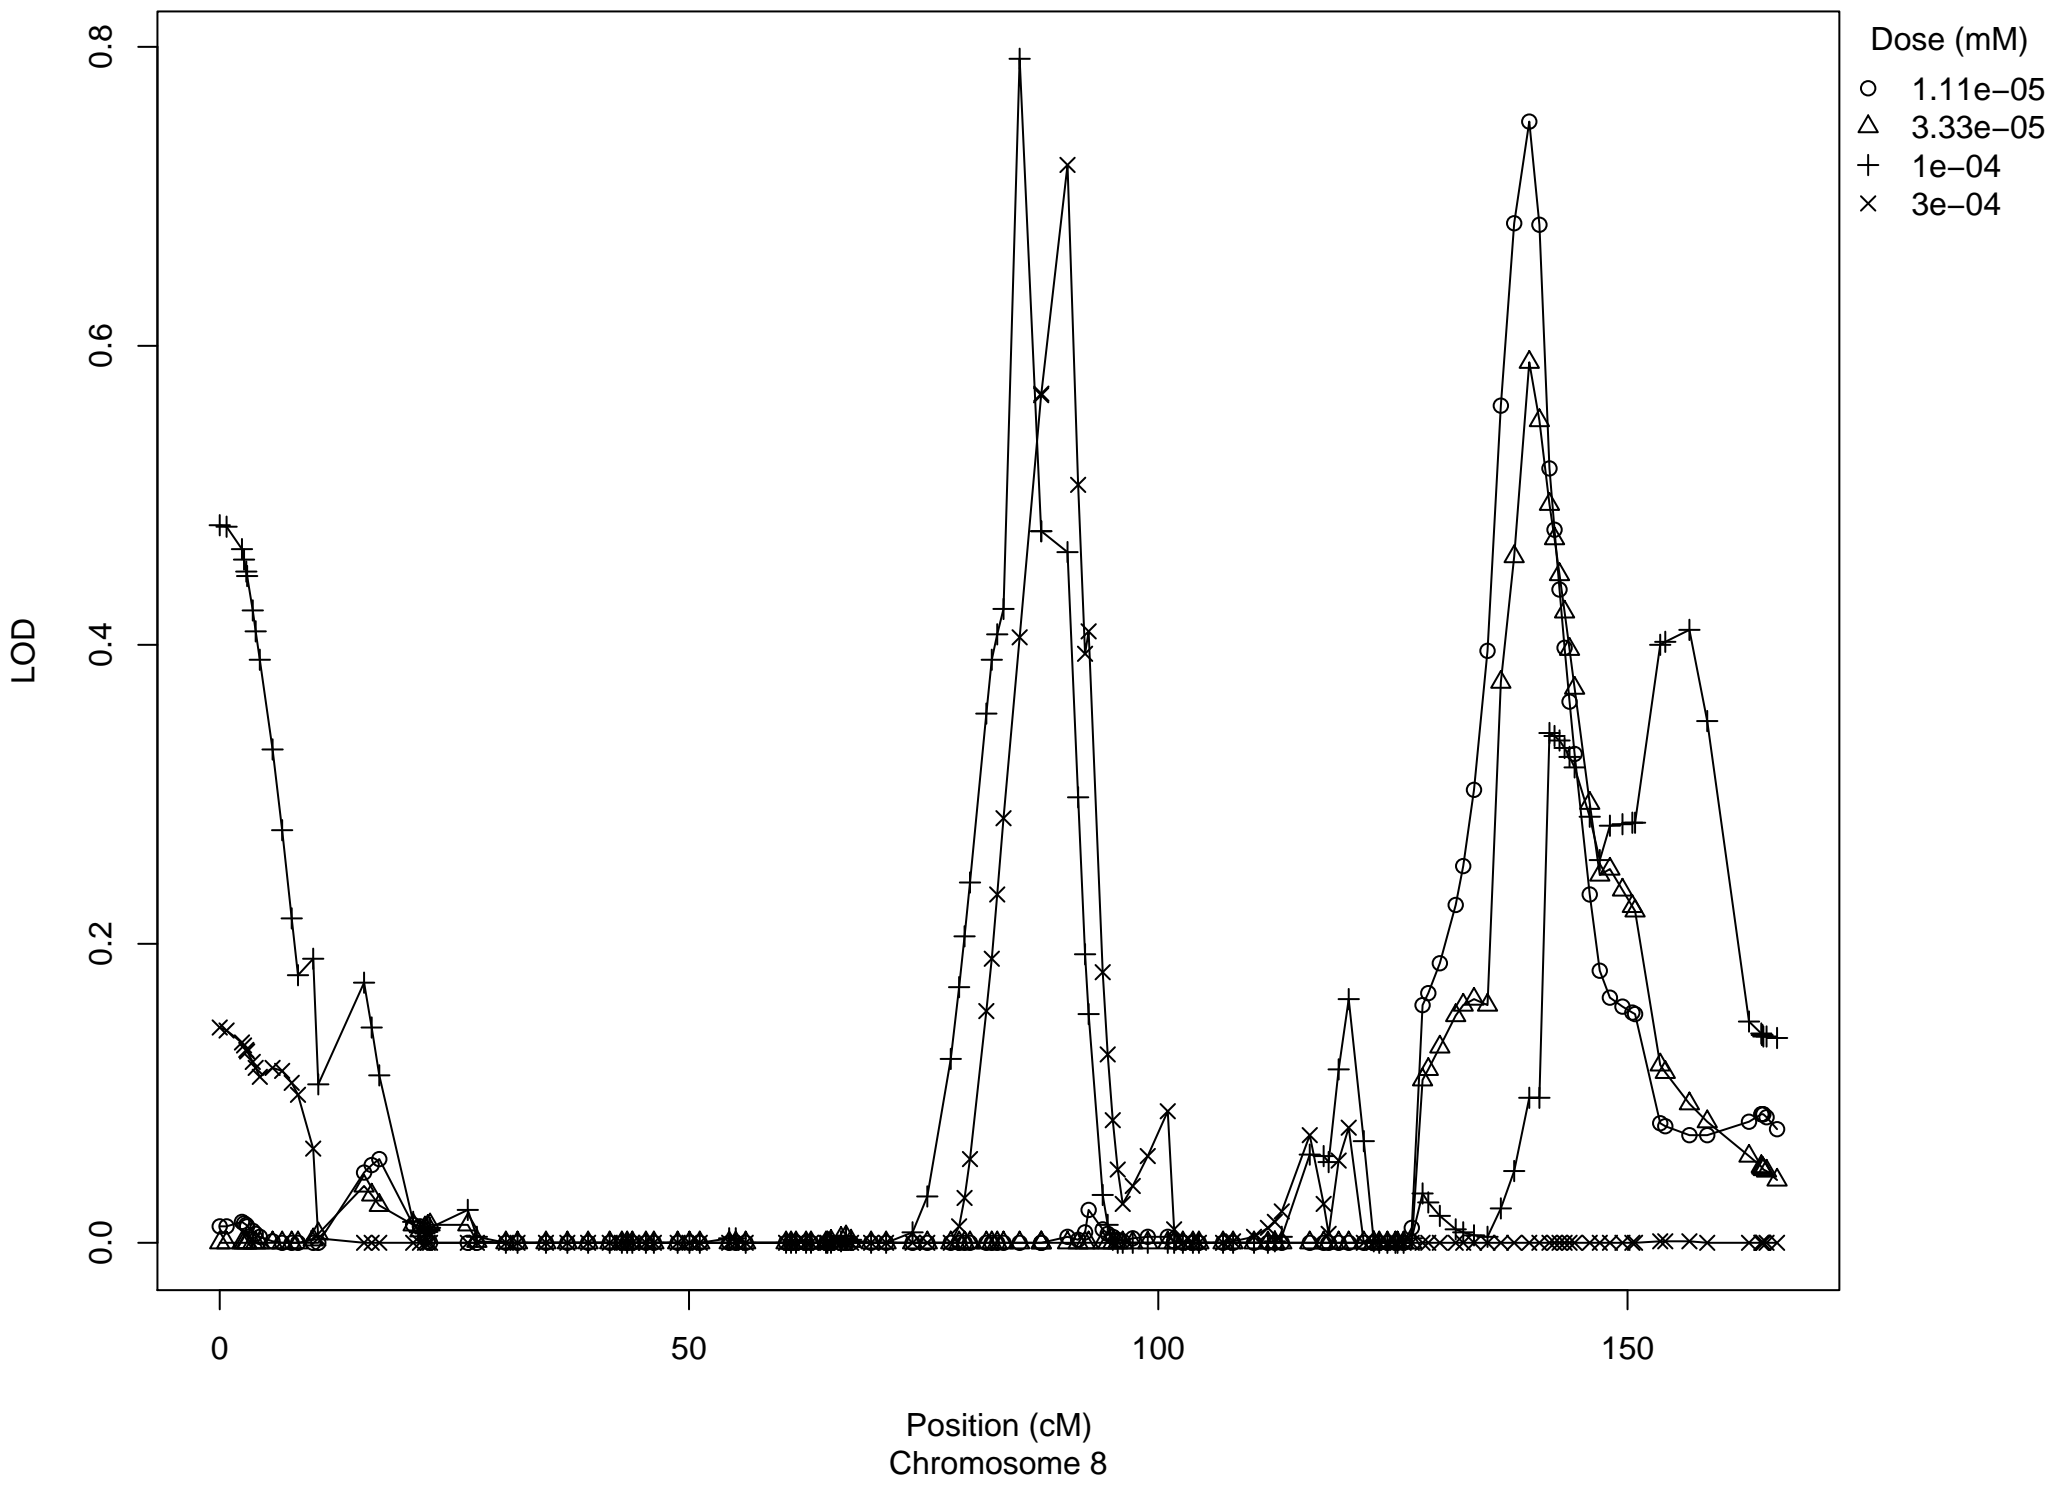

# Mitomycin C (Mitom)

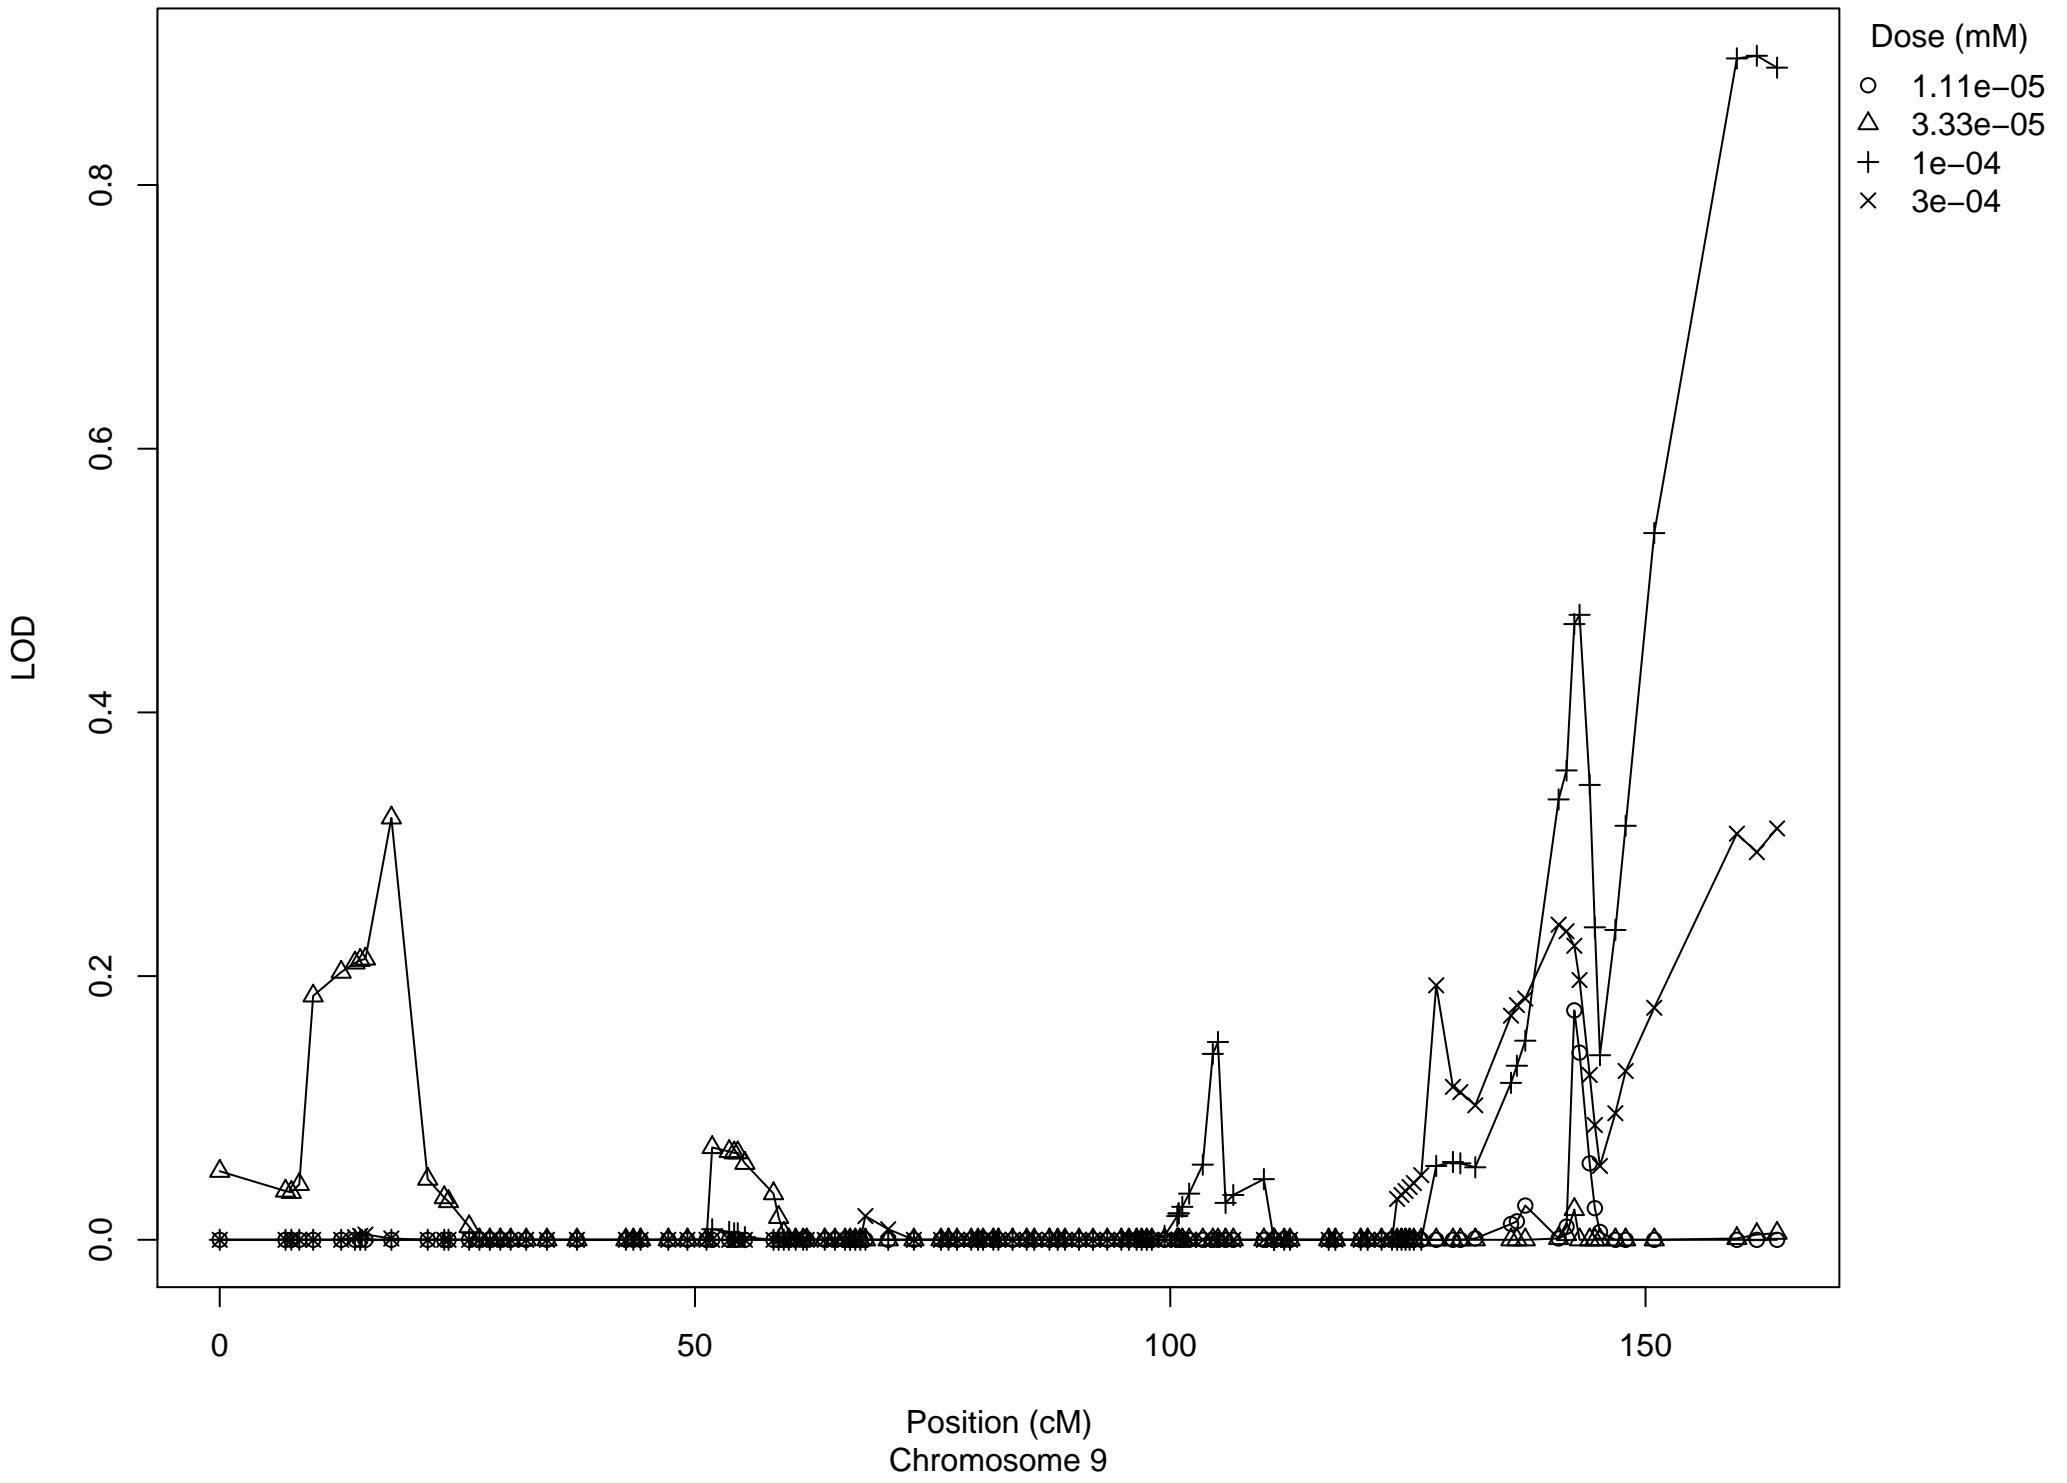

# Mitomycin C (Mitom)

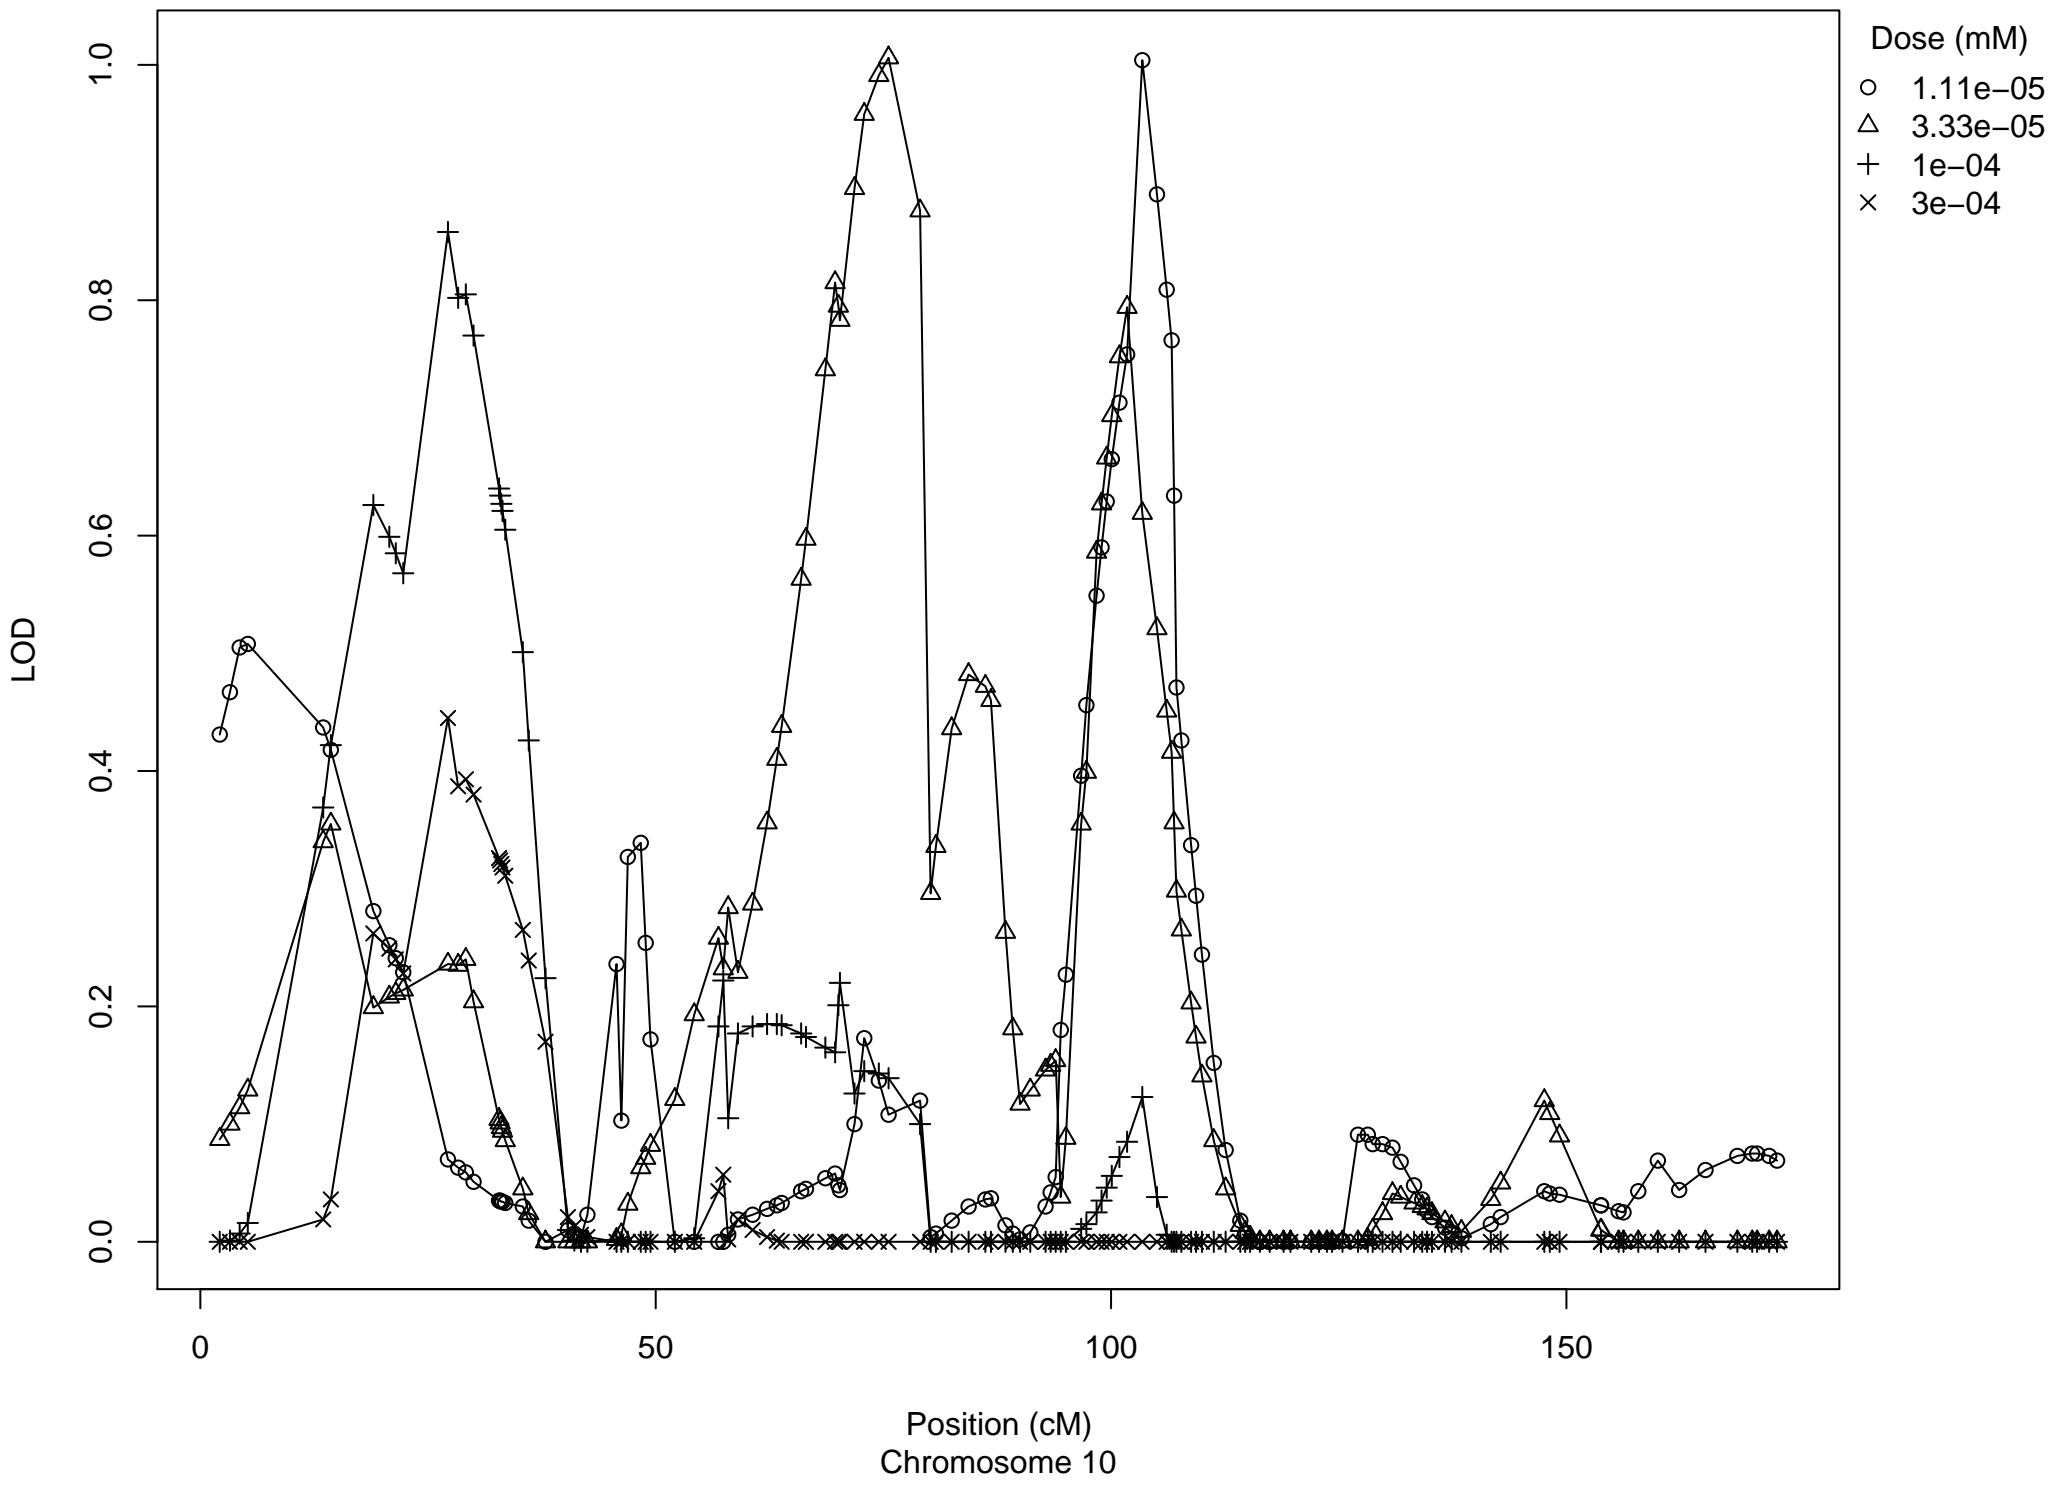

# Mitomycin C (Mitom)

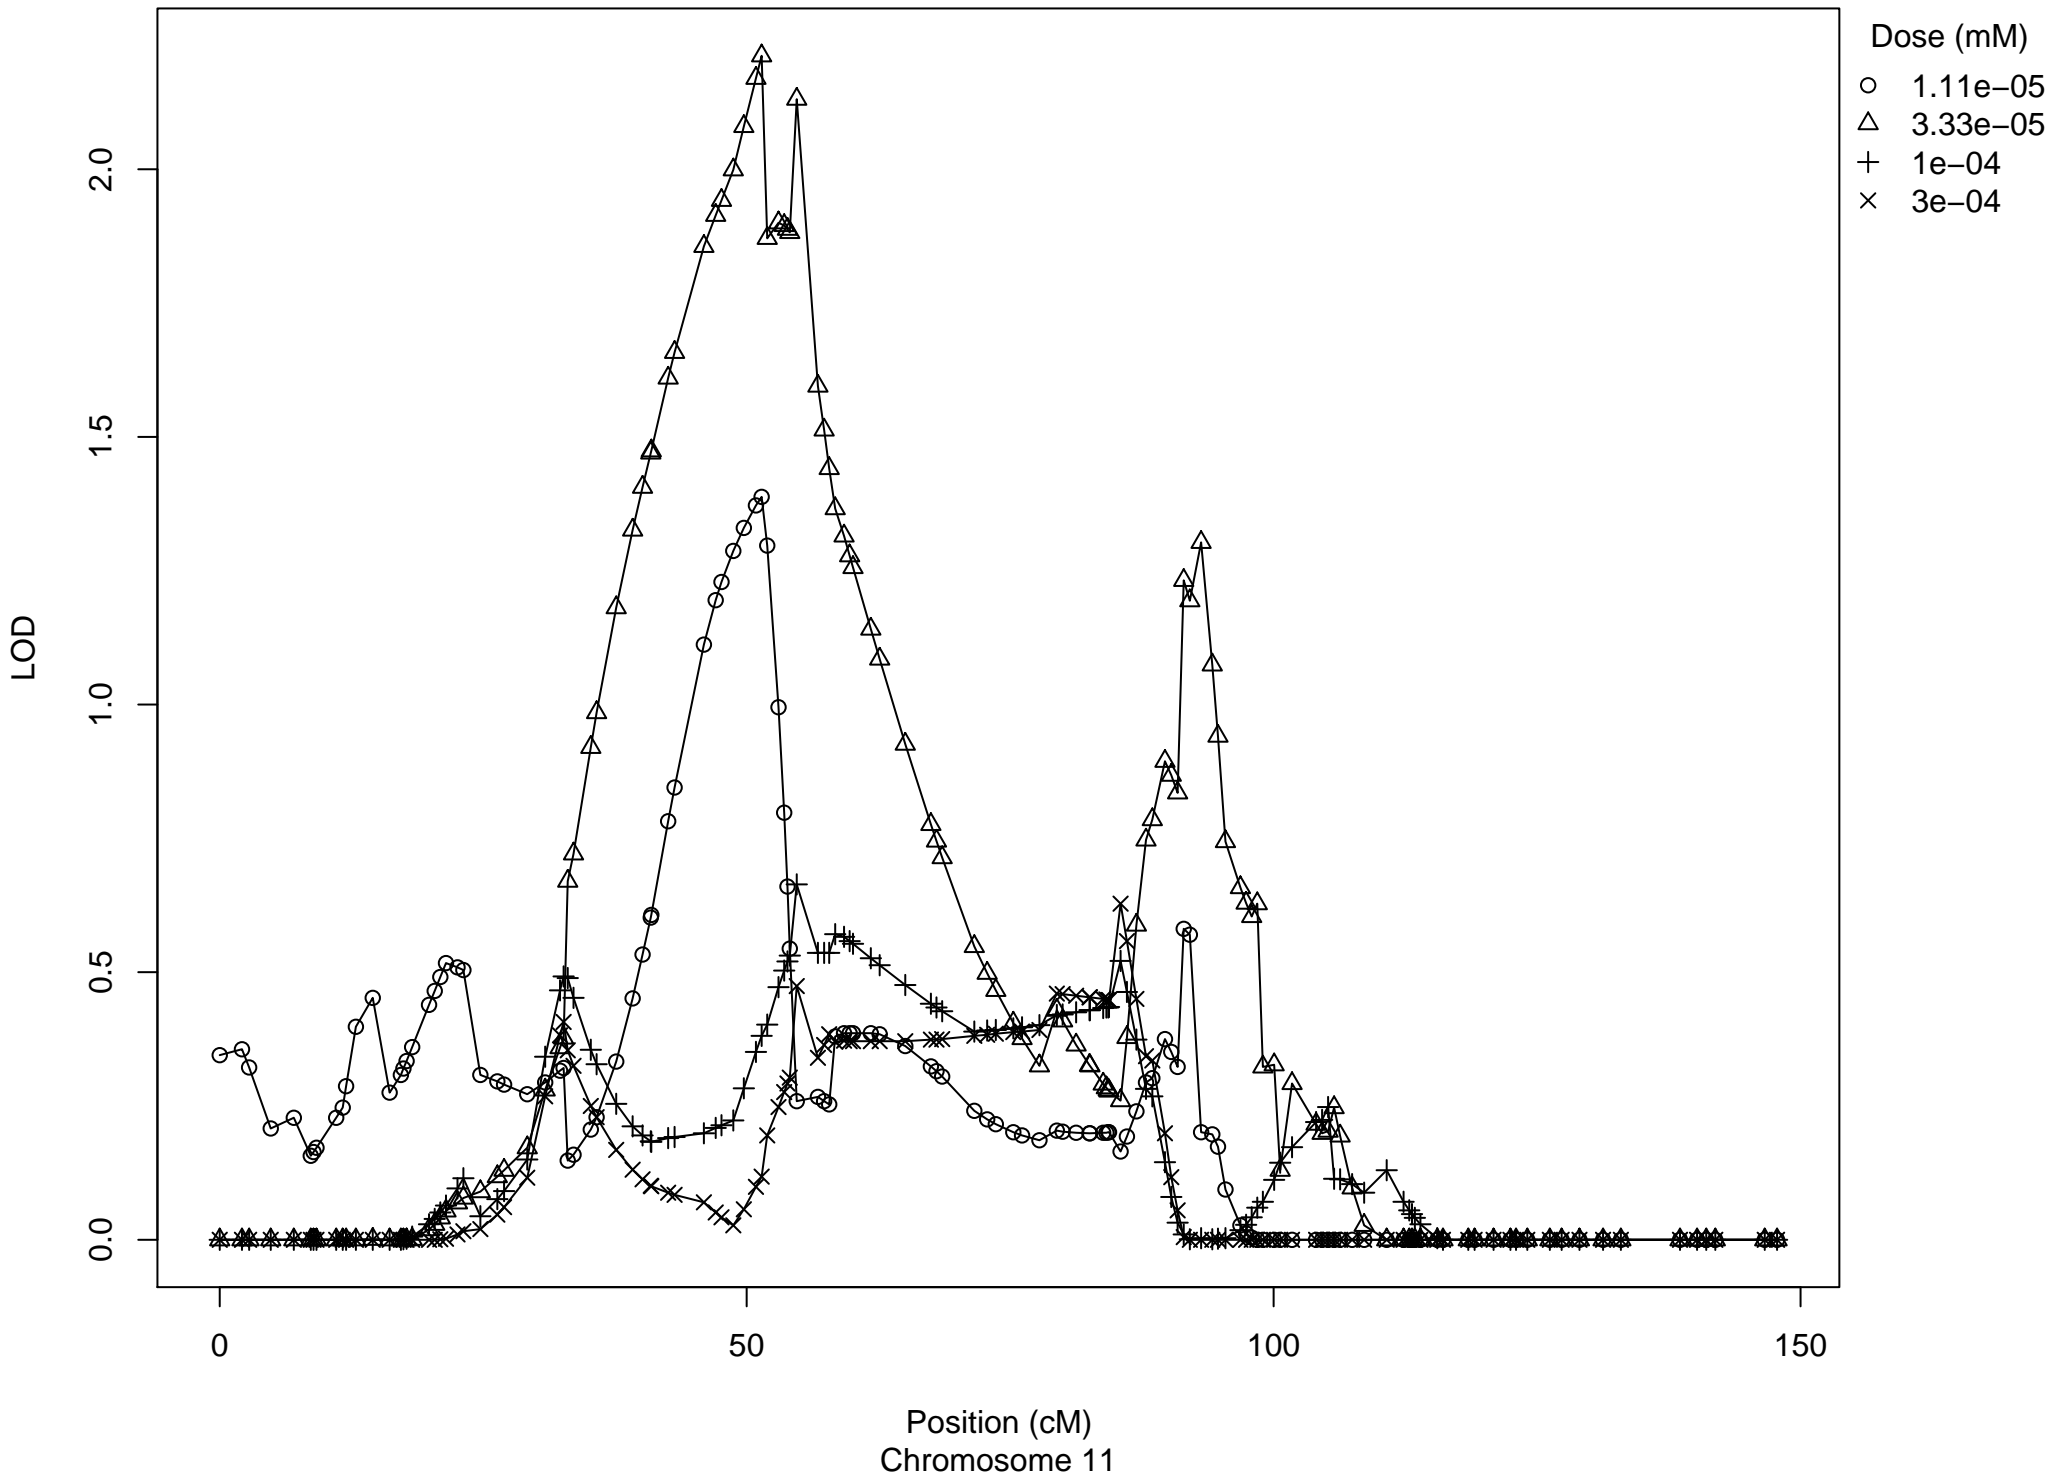

# Mitomycin C (Mitom)

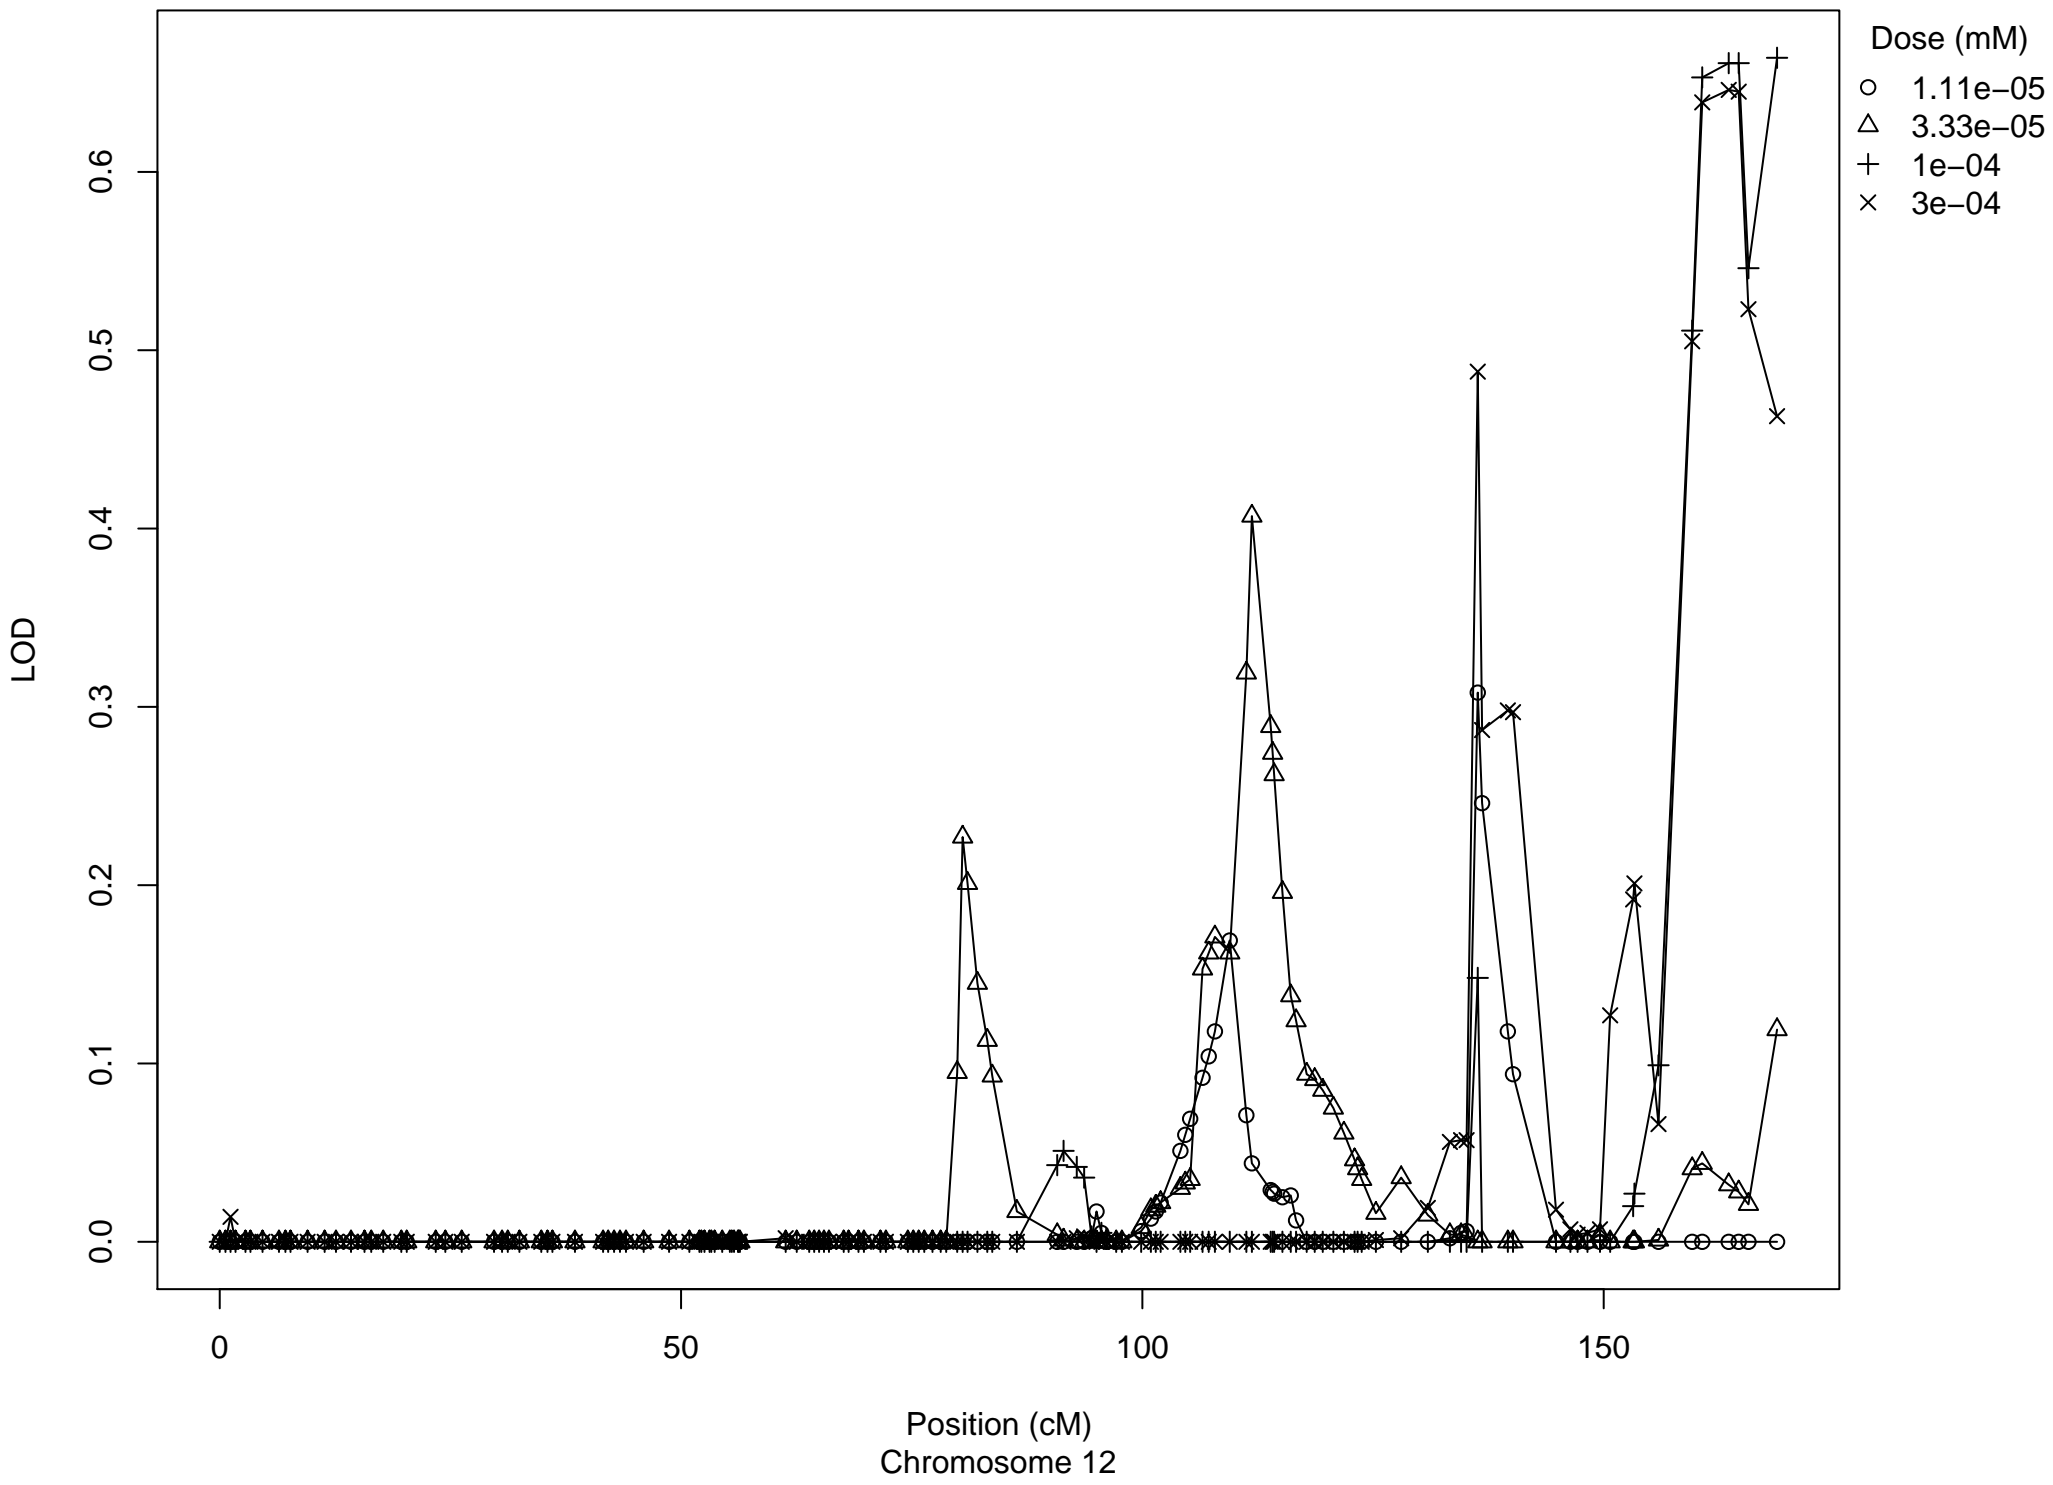



# Mitomycin C (Mitom)

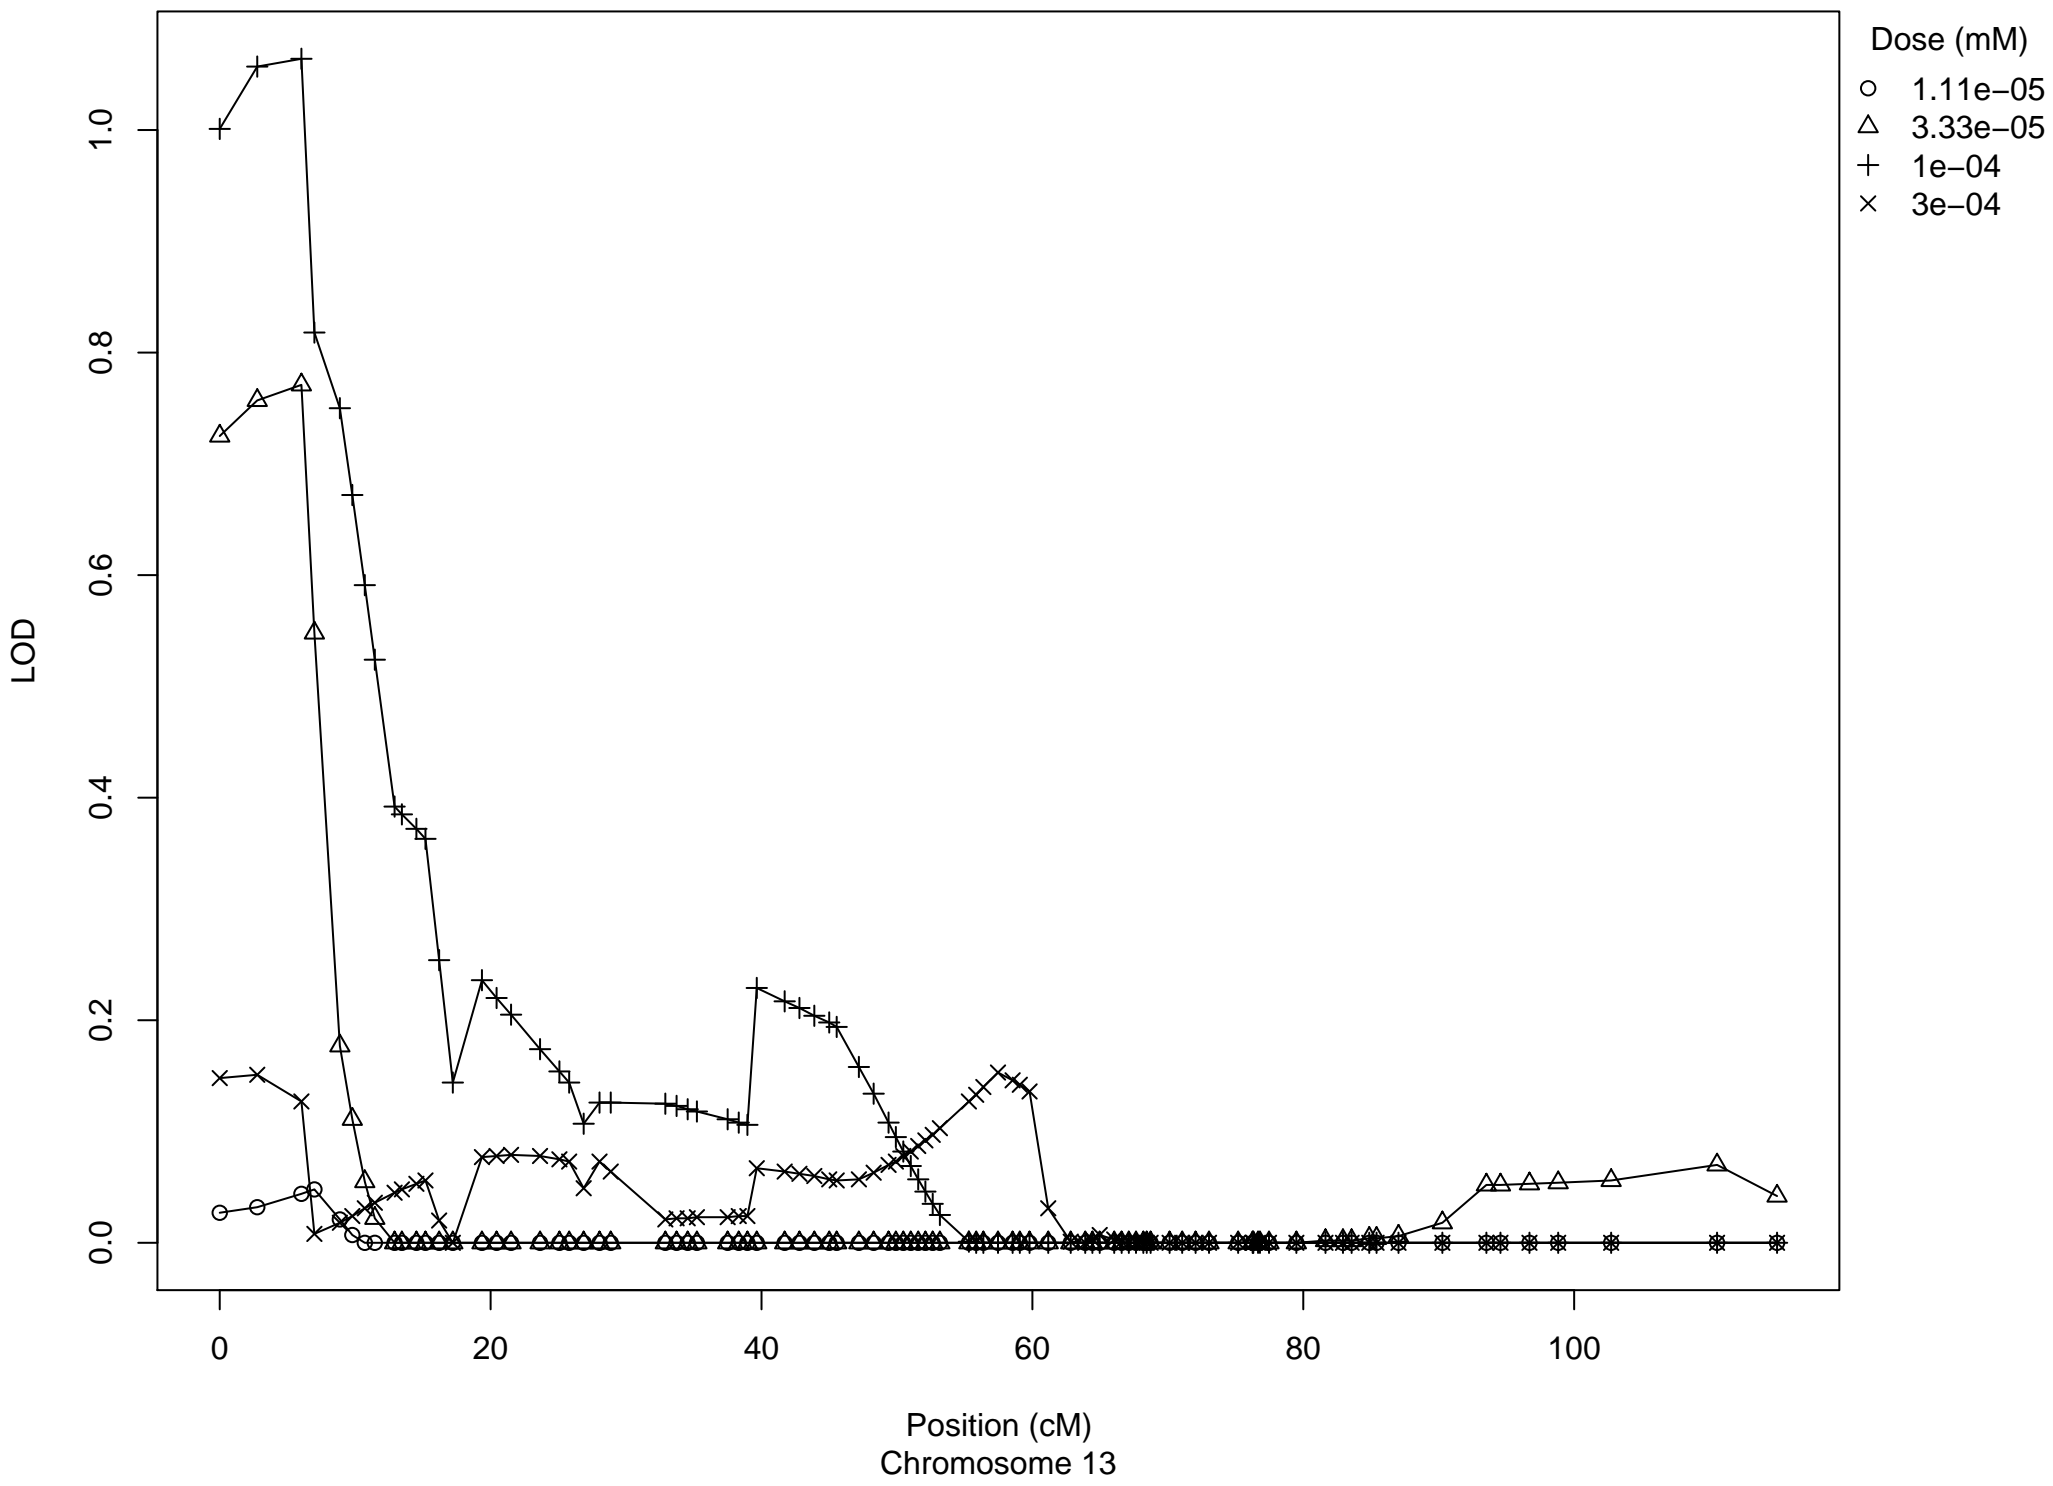

# Mitomycin C (Mitom)

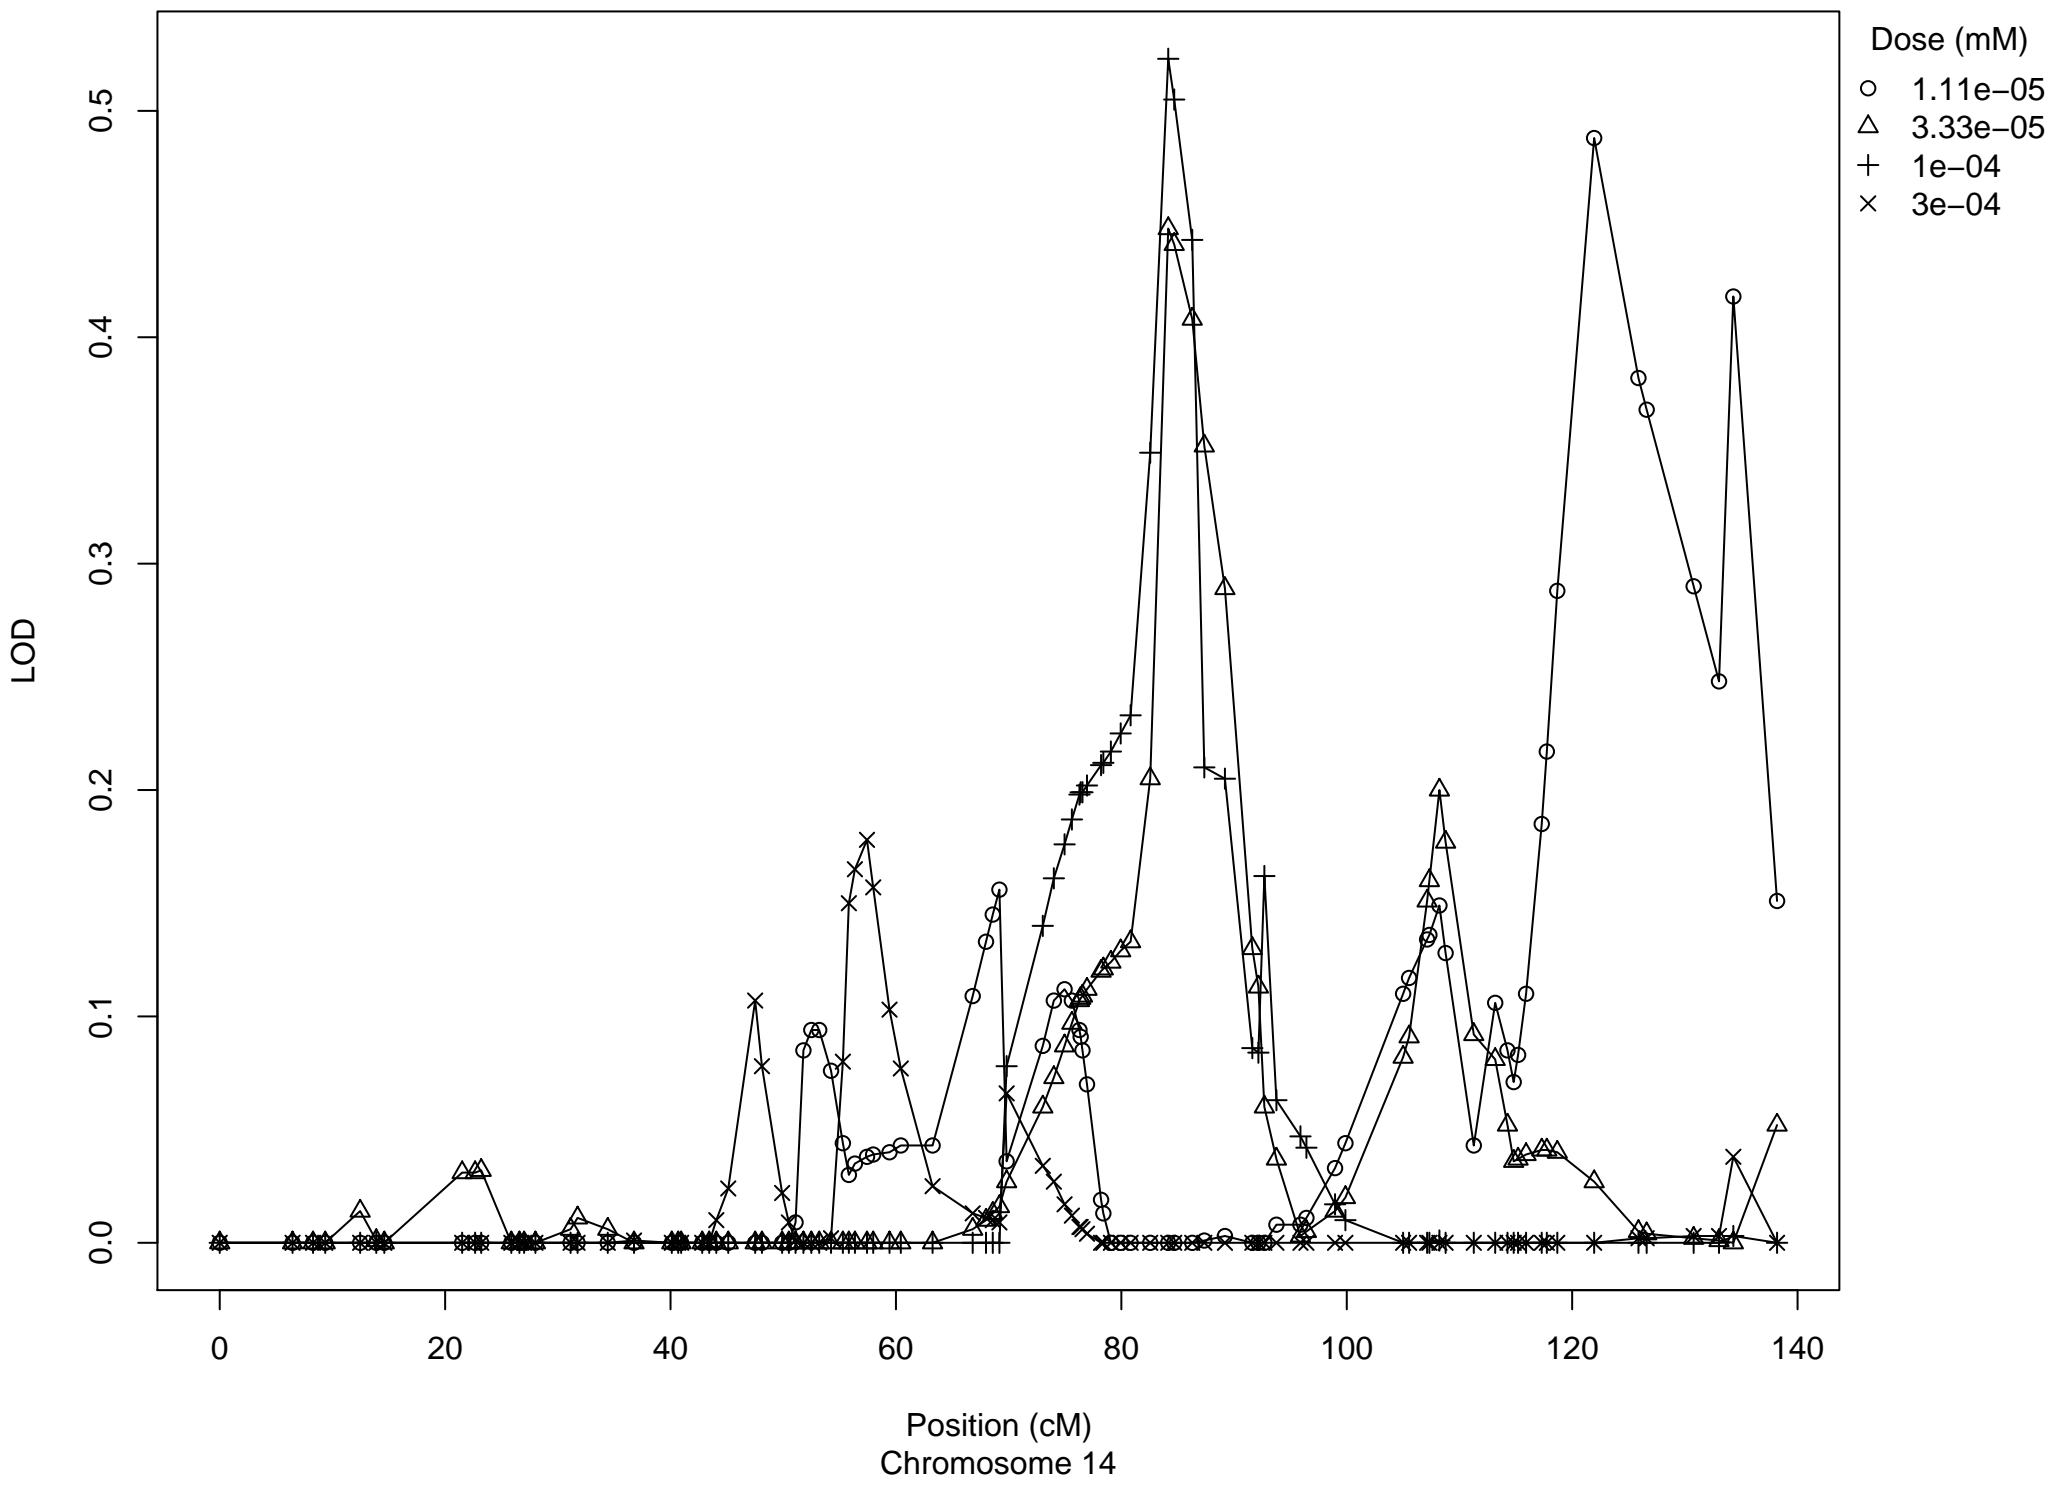

# Mitomycin C (Mitom)

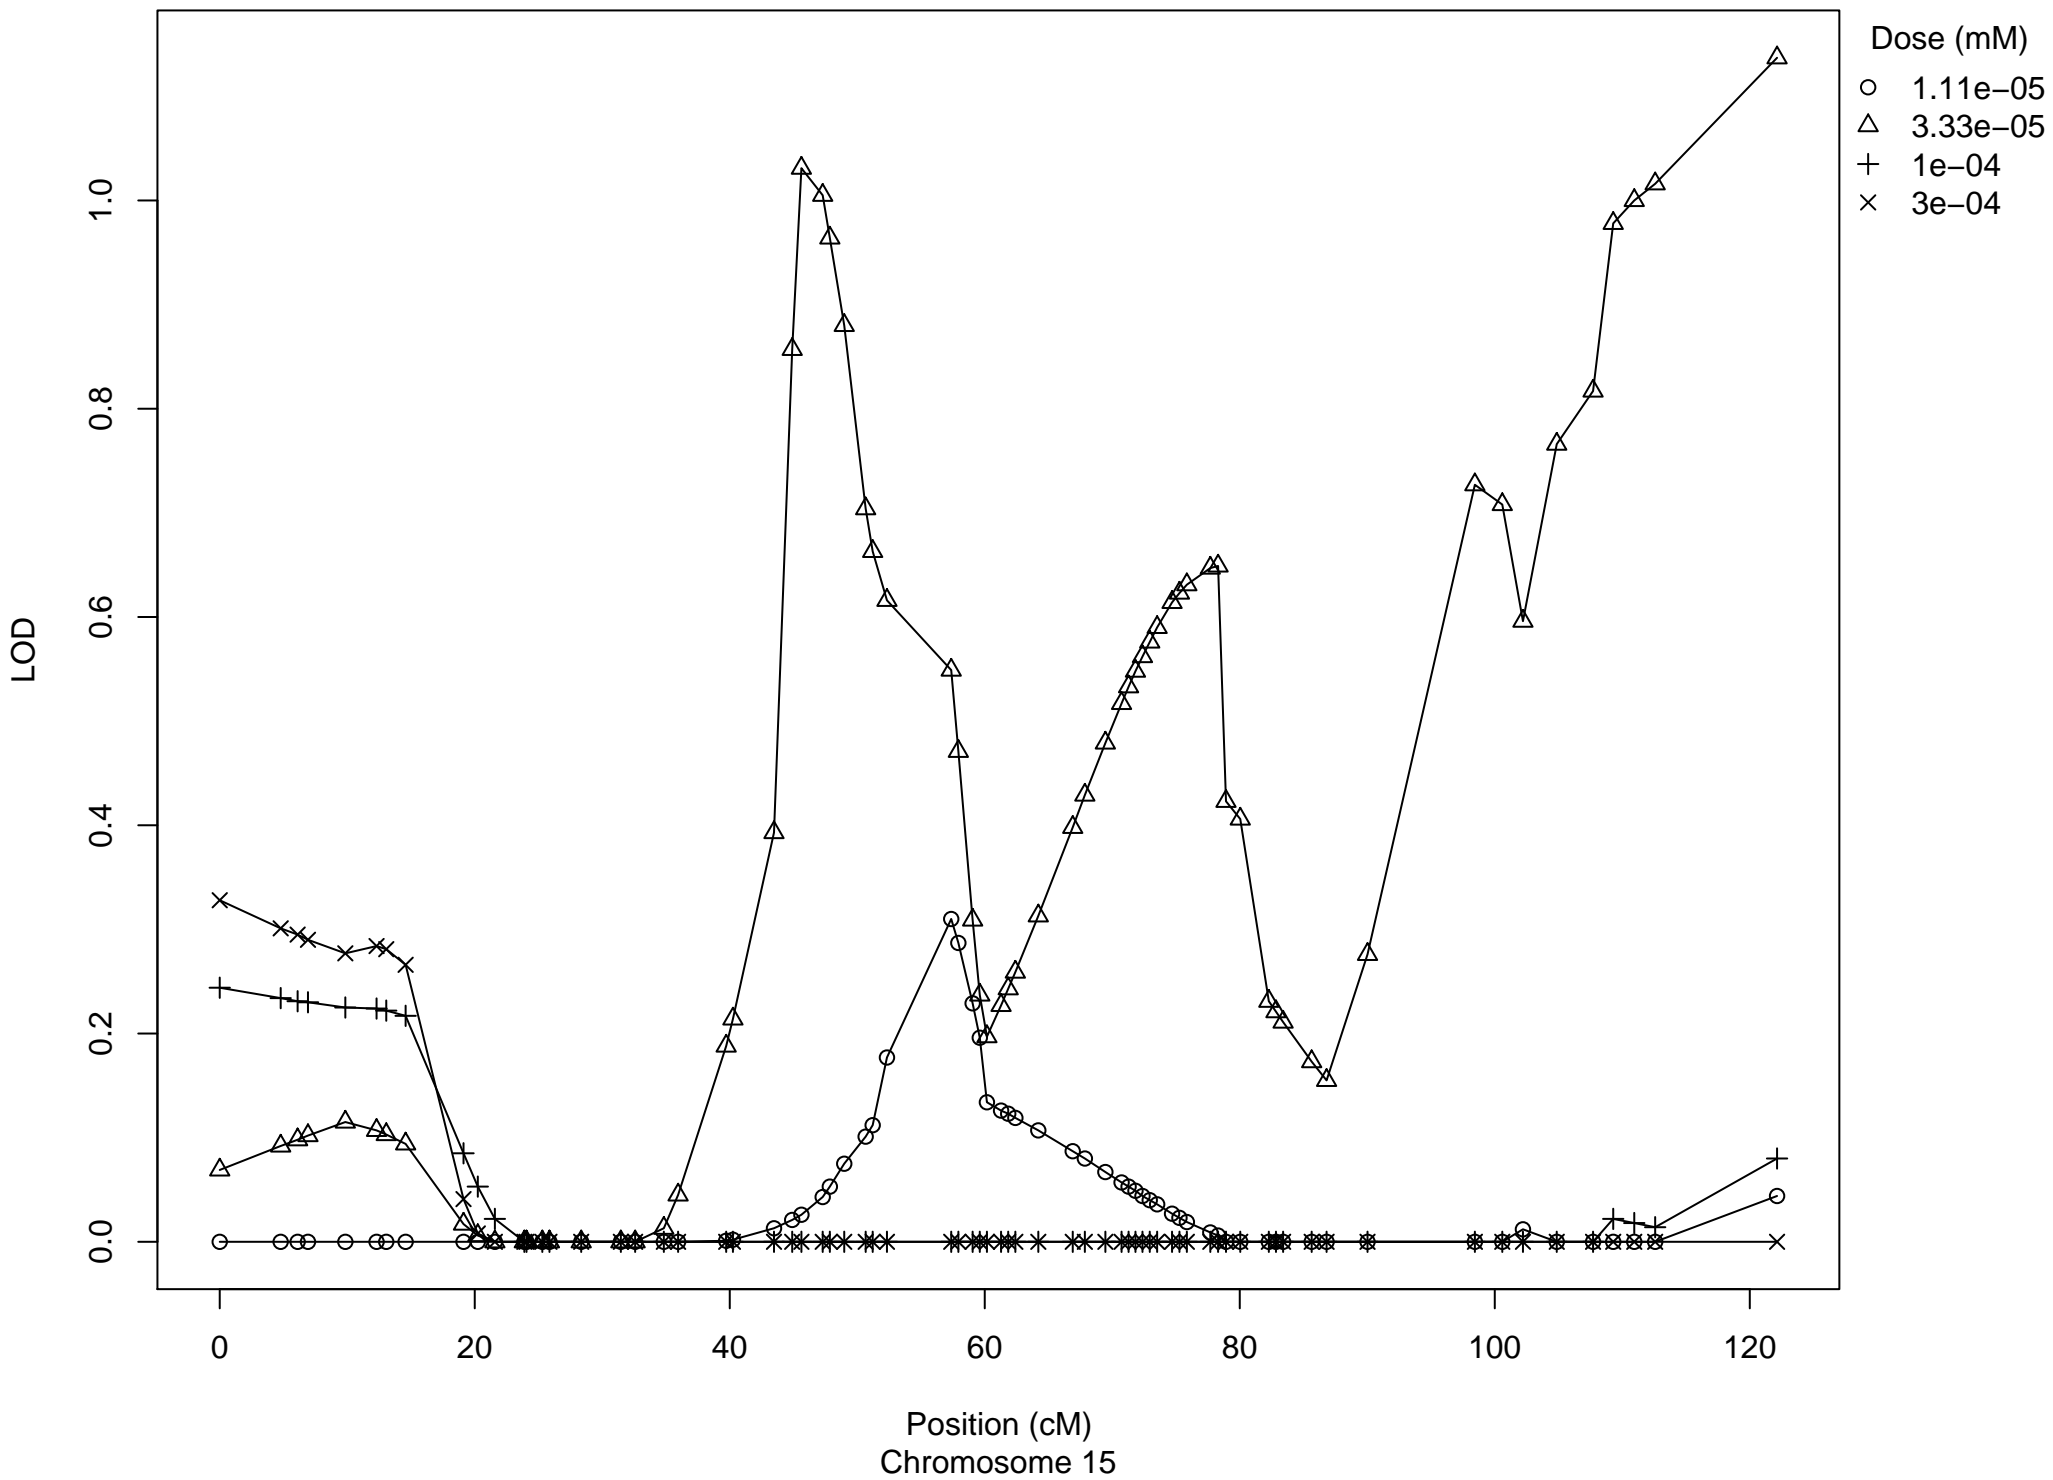

# Mitomycin C (Mitom)

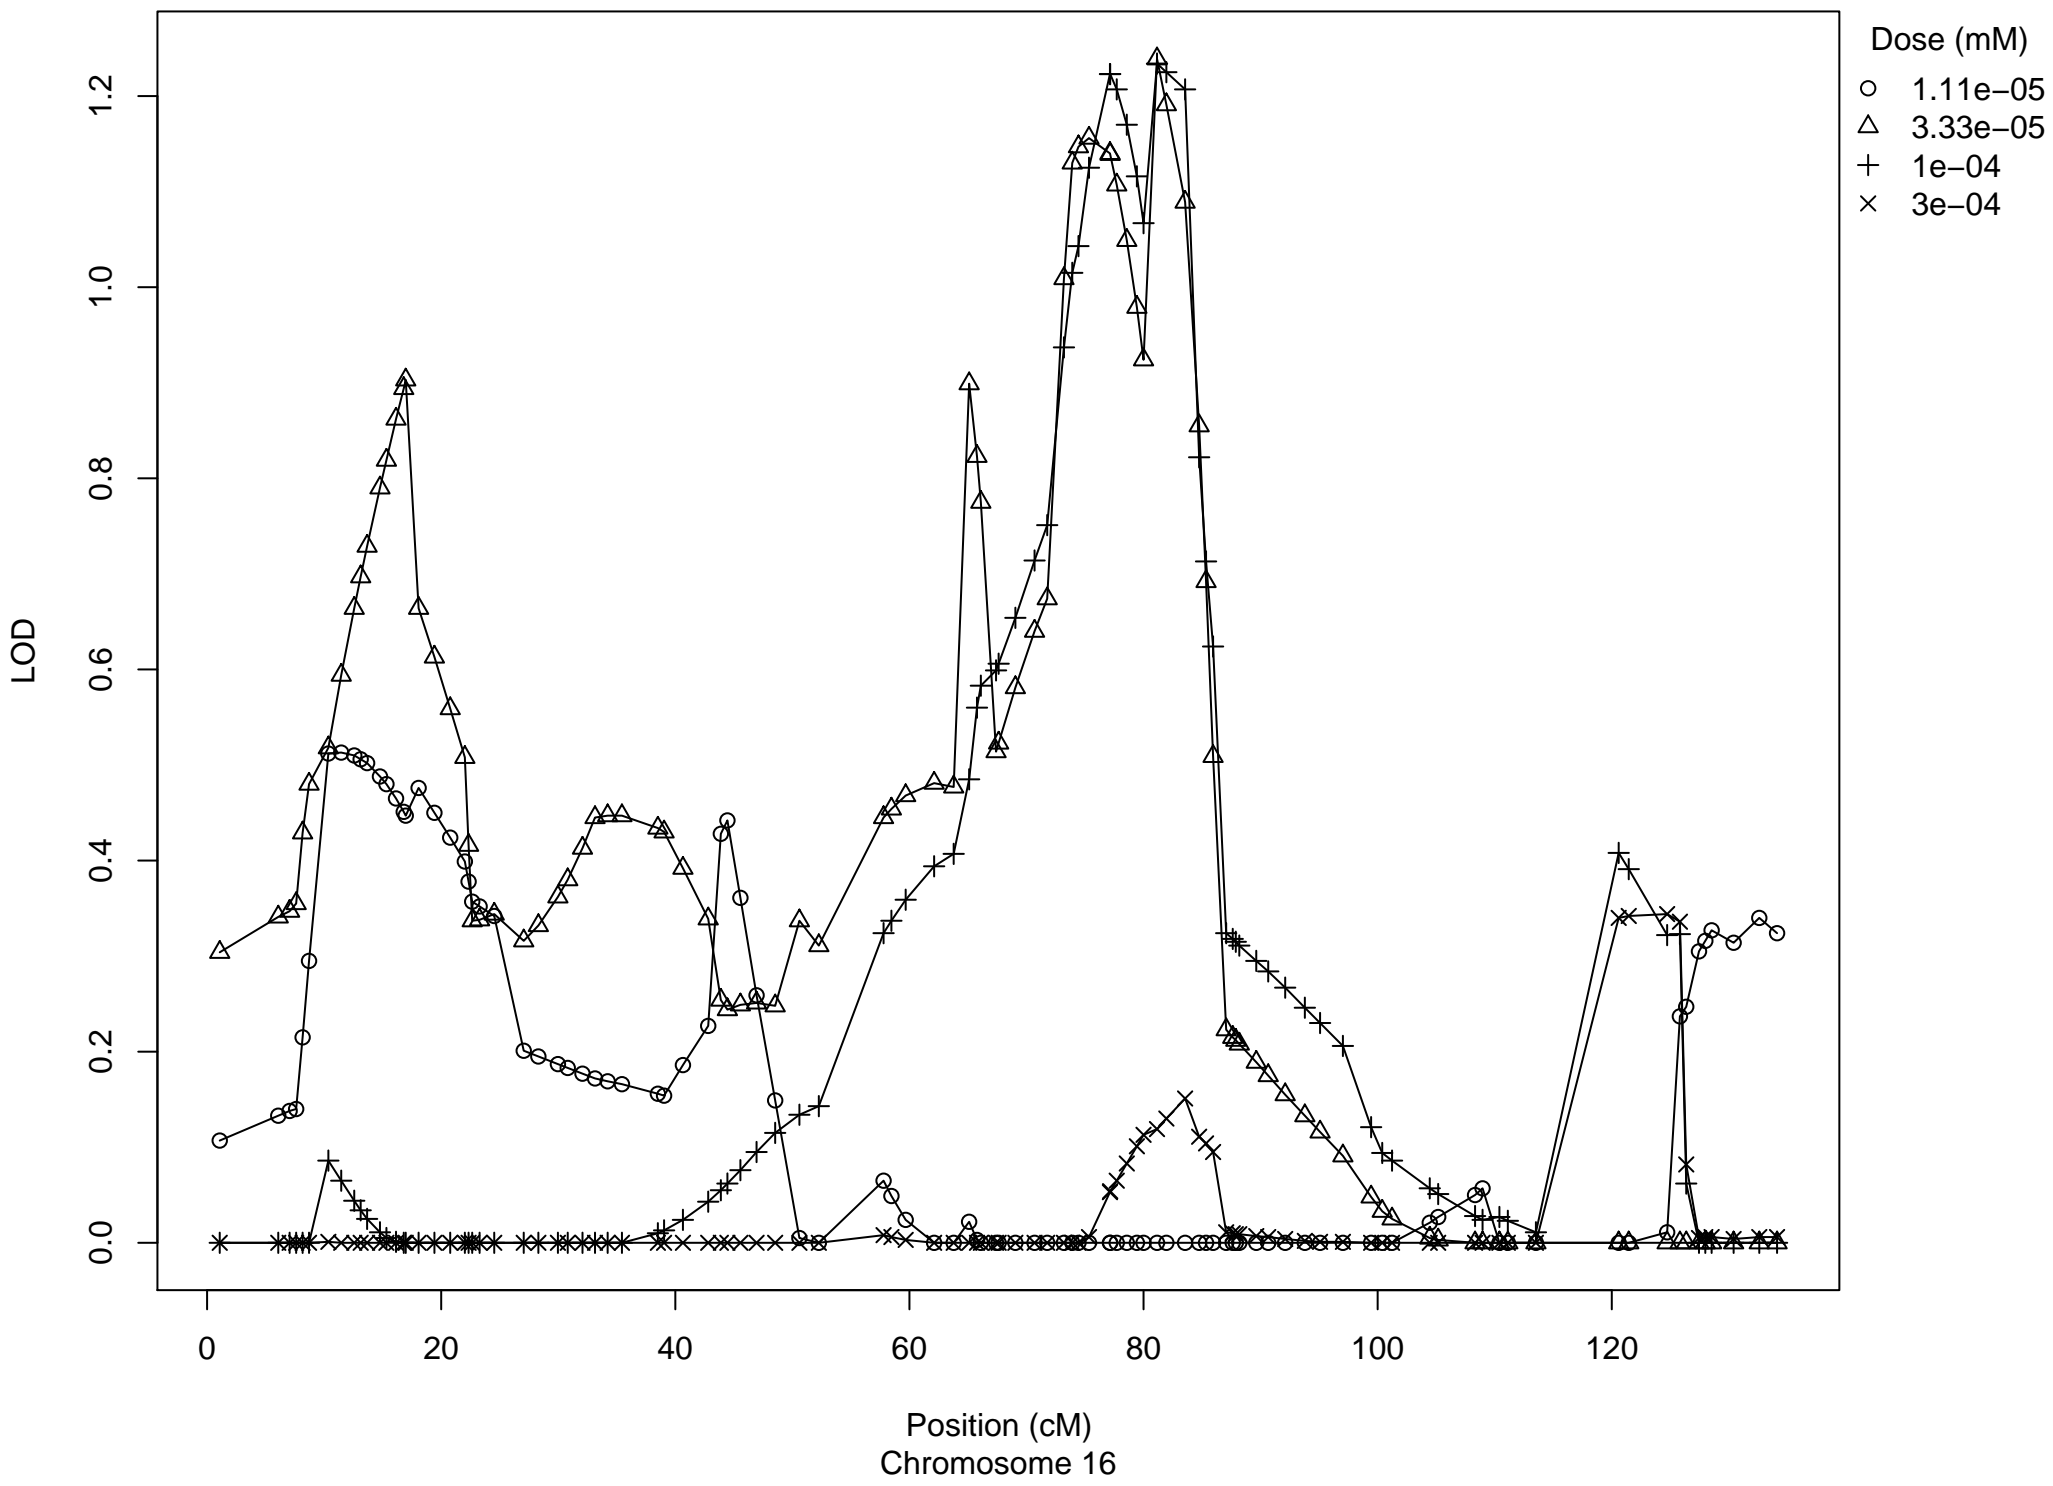

# Mitomycin C (Mitom)

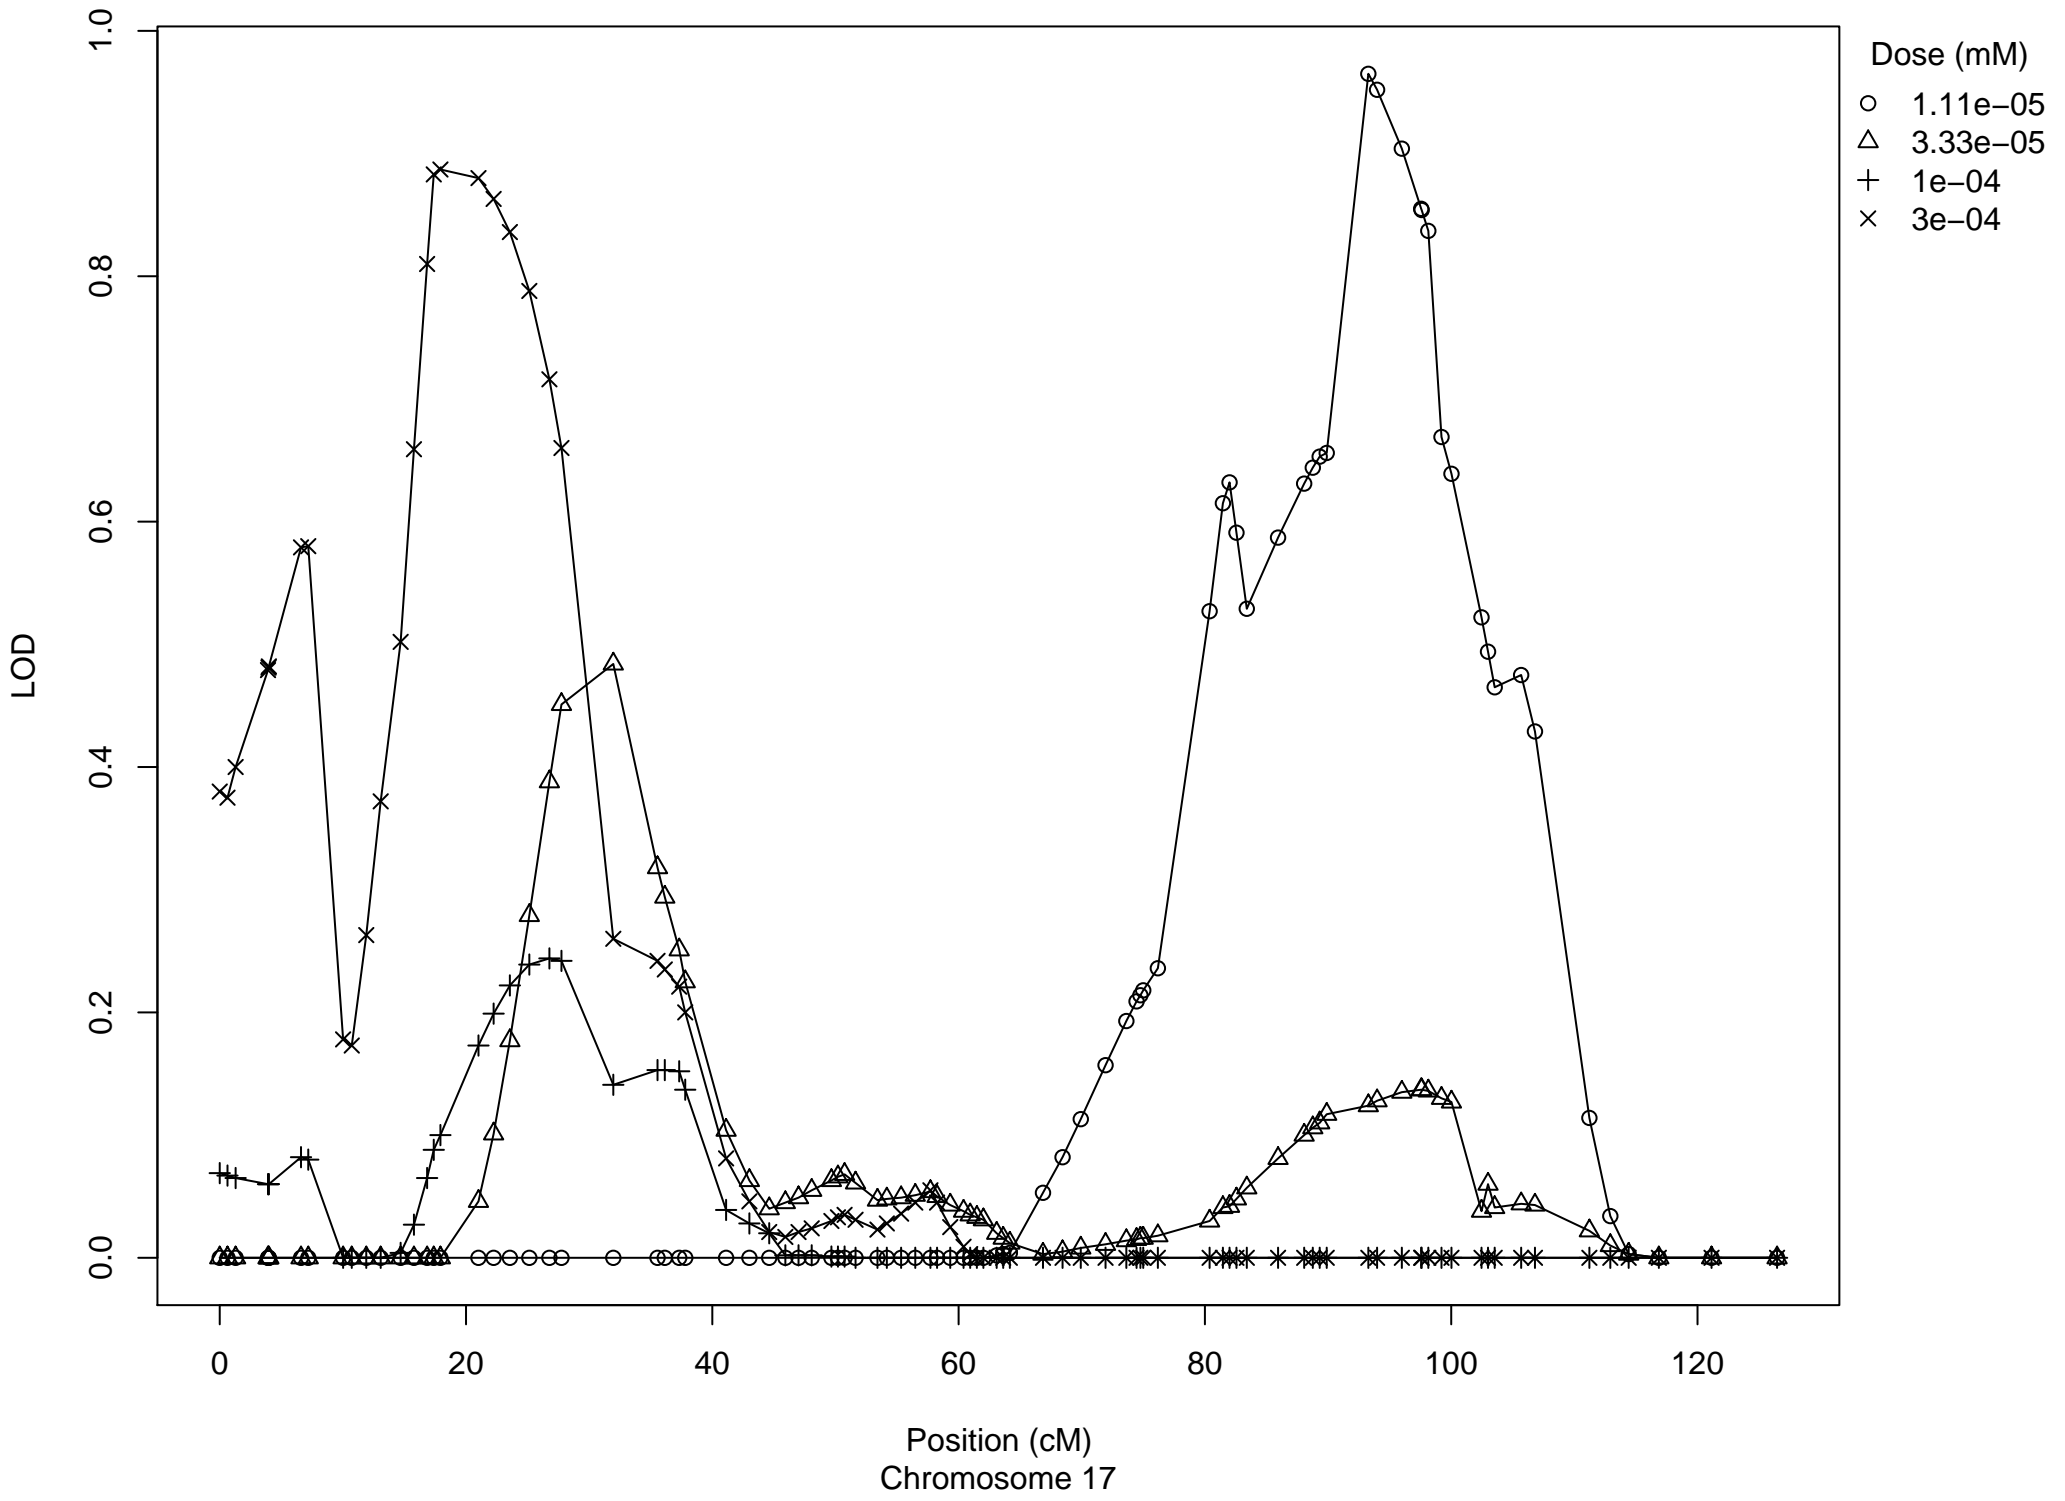

# Mitomycin C (Mitom)

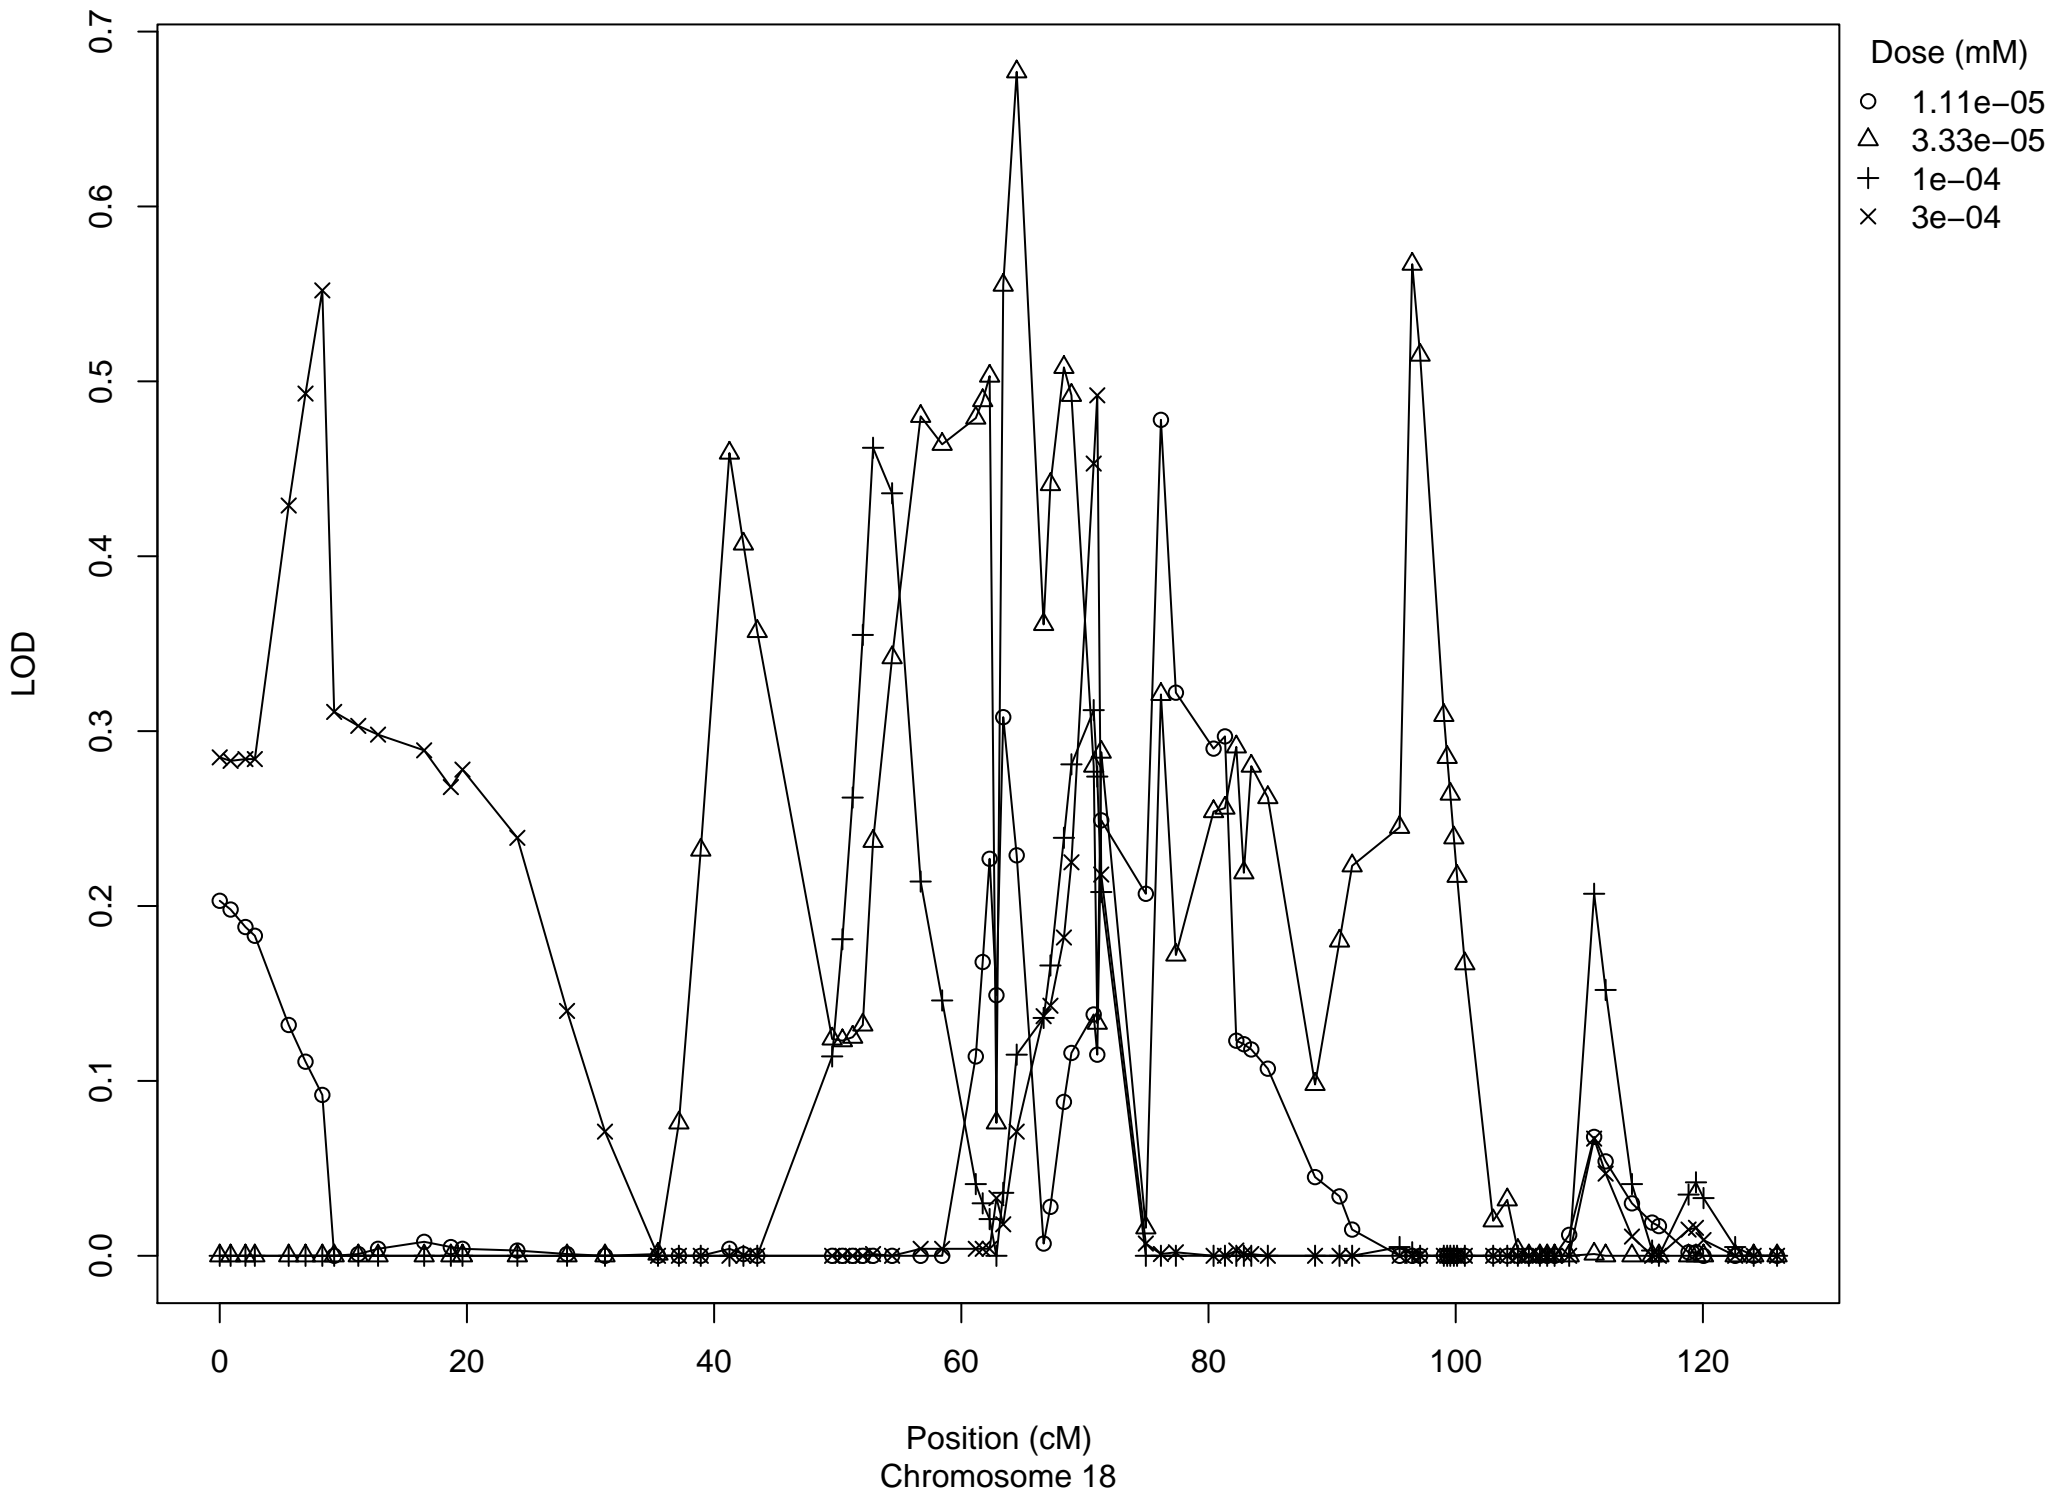

# Mitomycin C (Mitom)

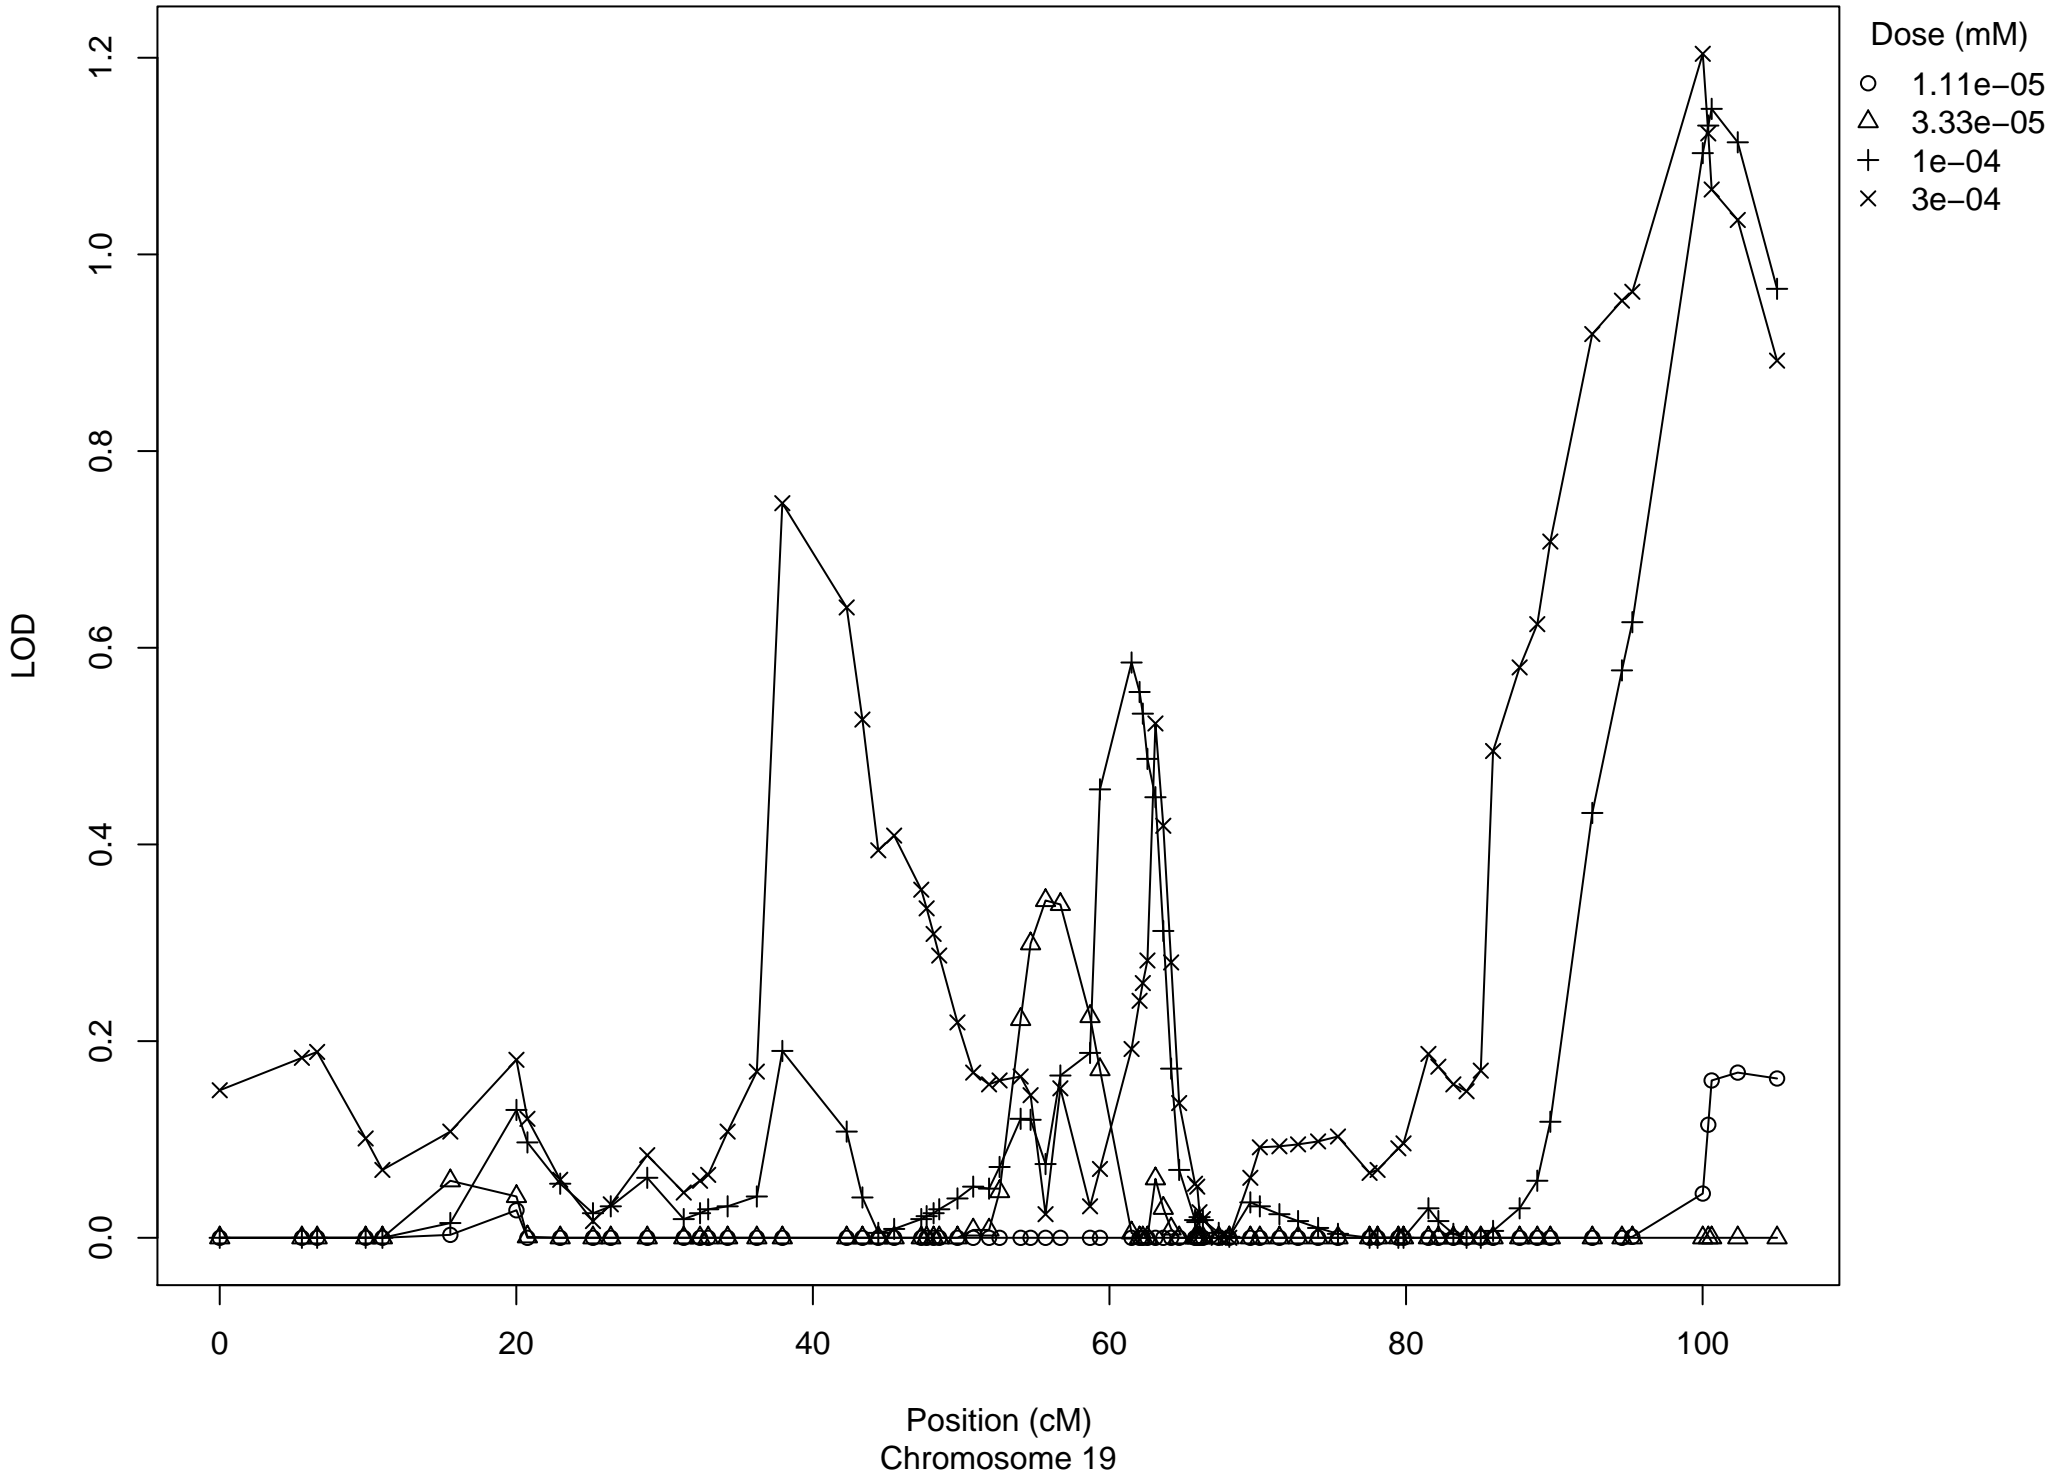

# Mitomycin C (Mitom)

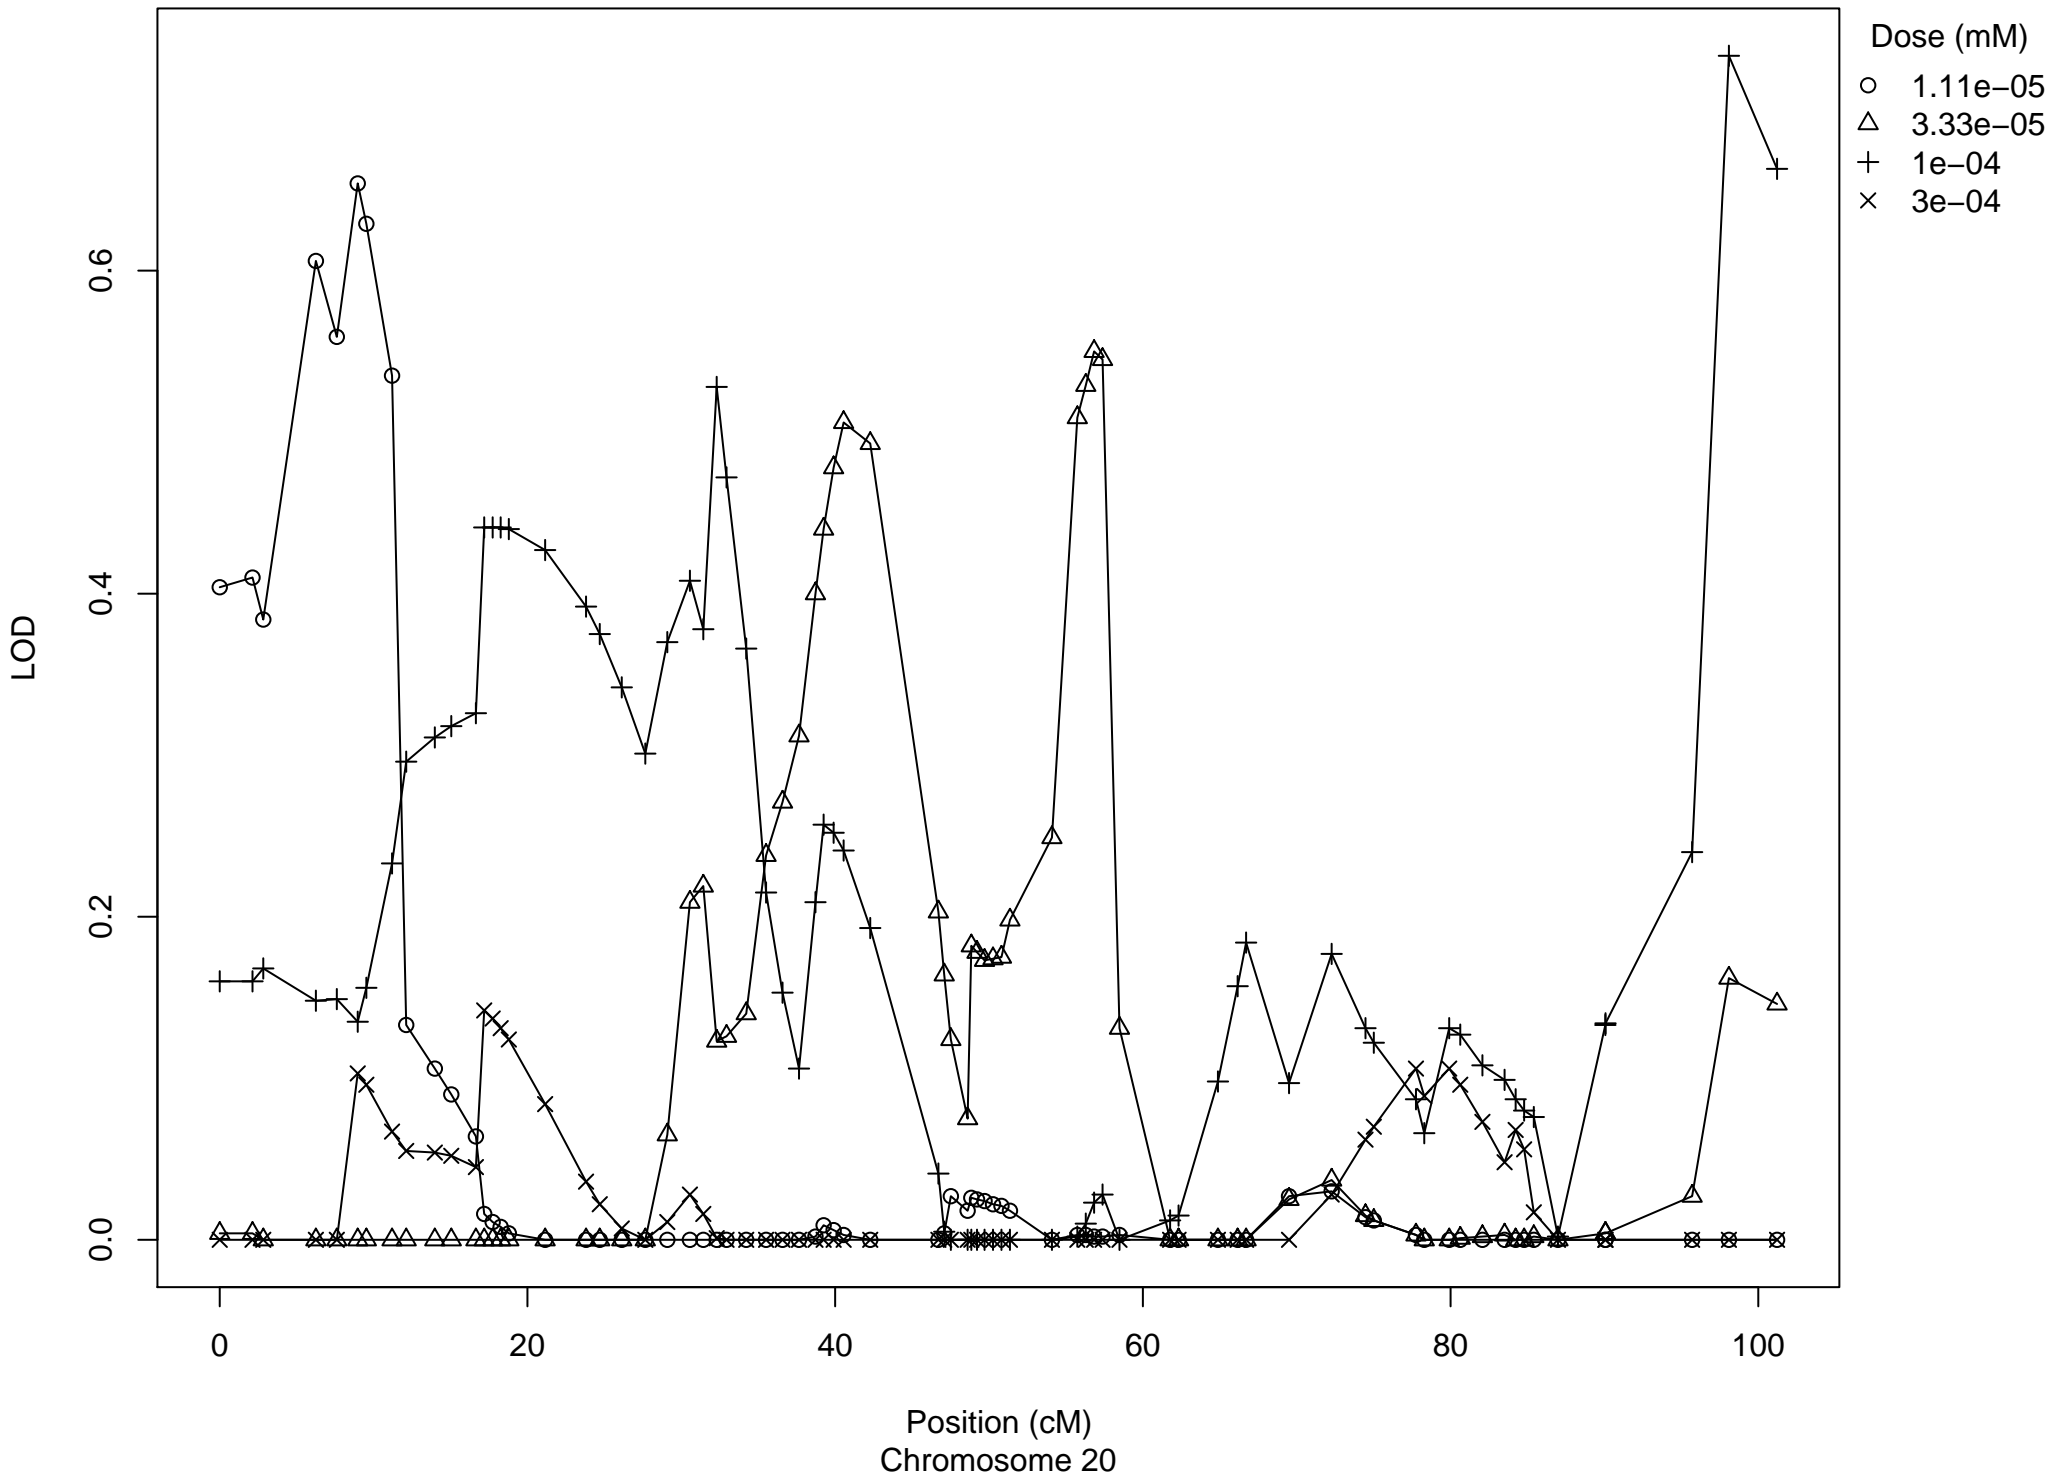



# Mitomycin C (Mitom)

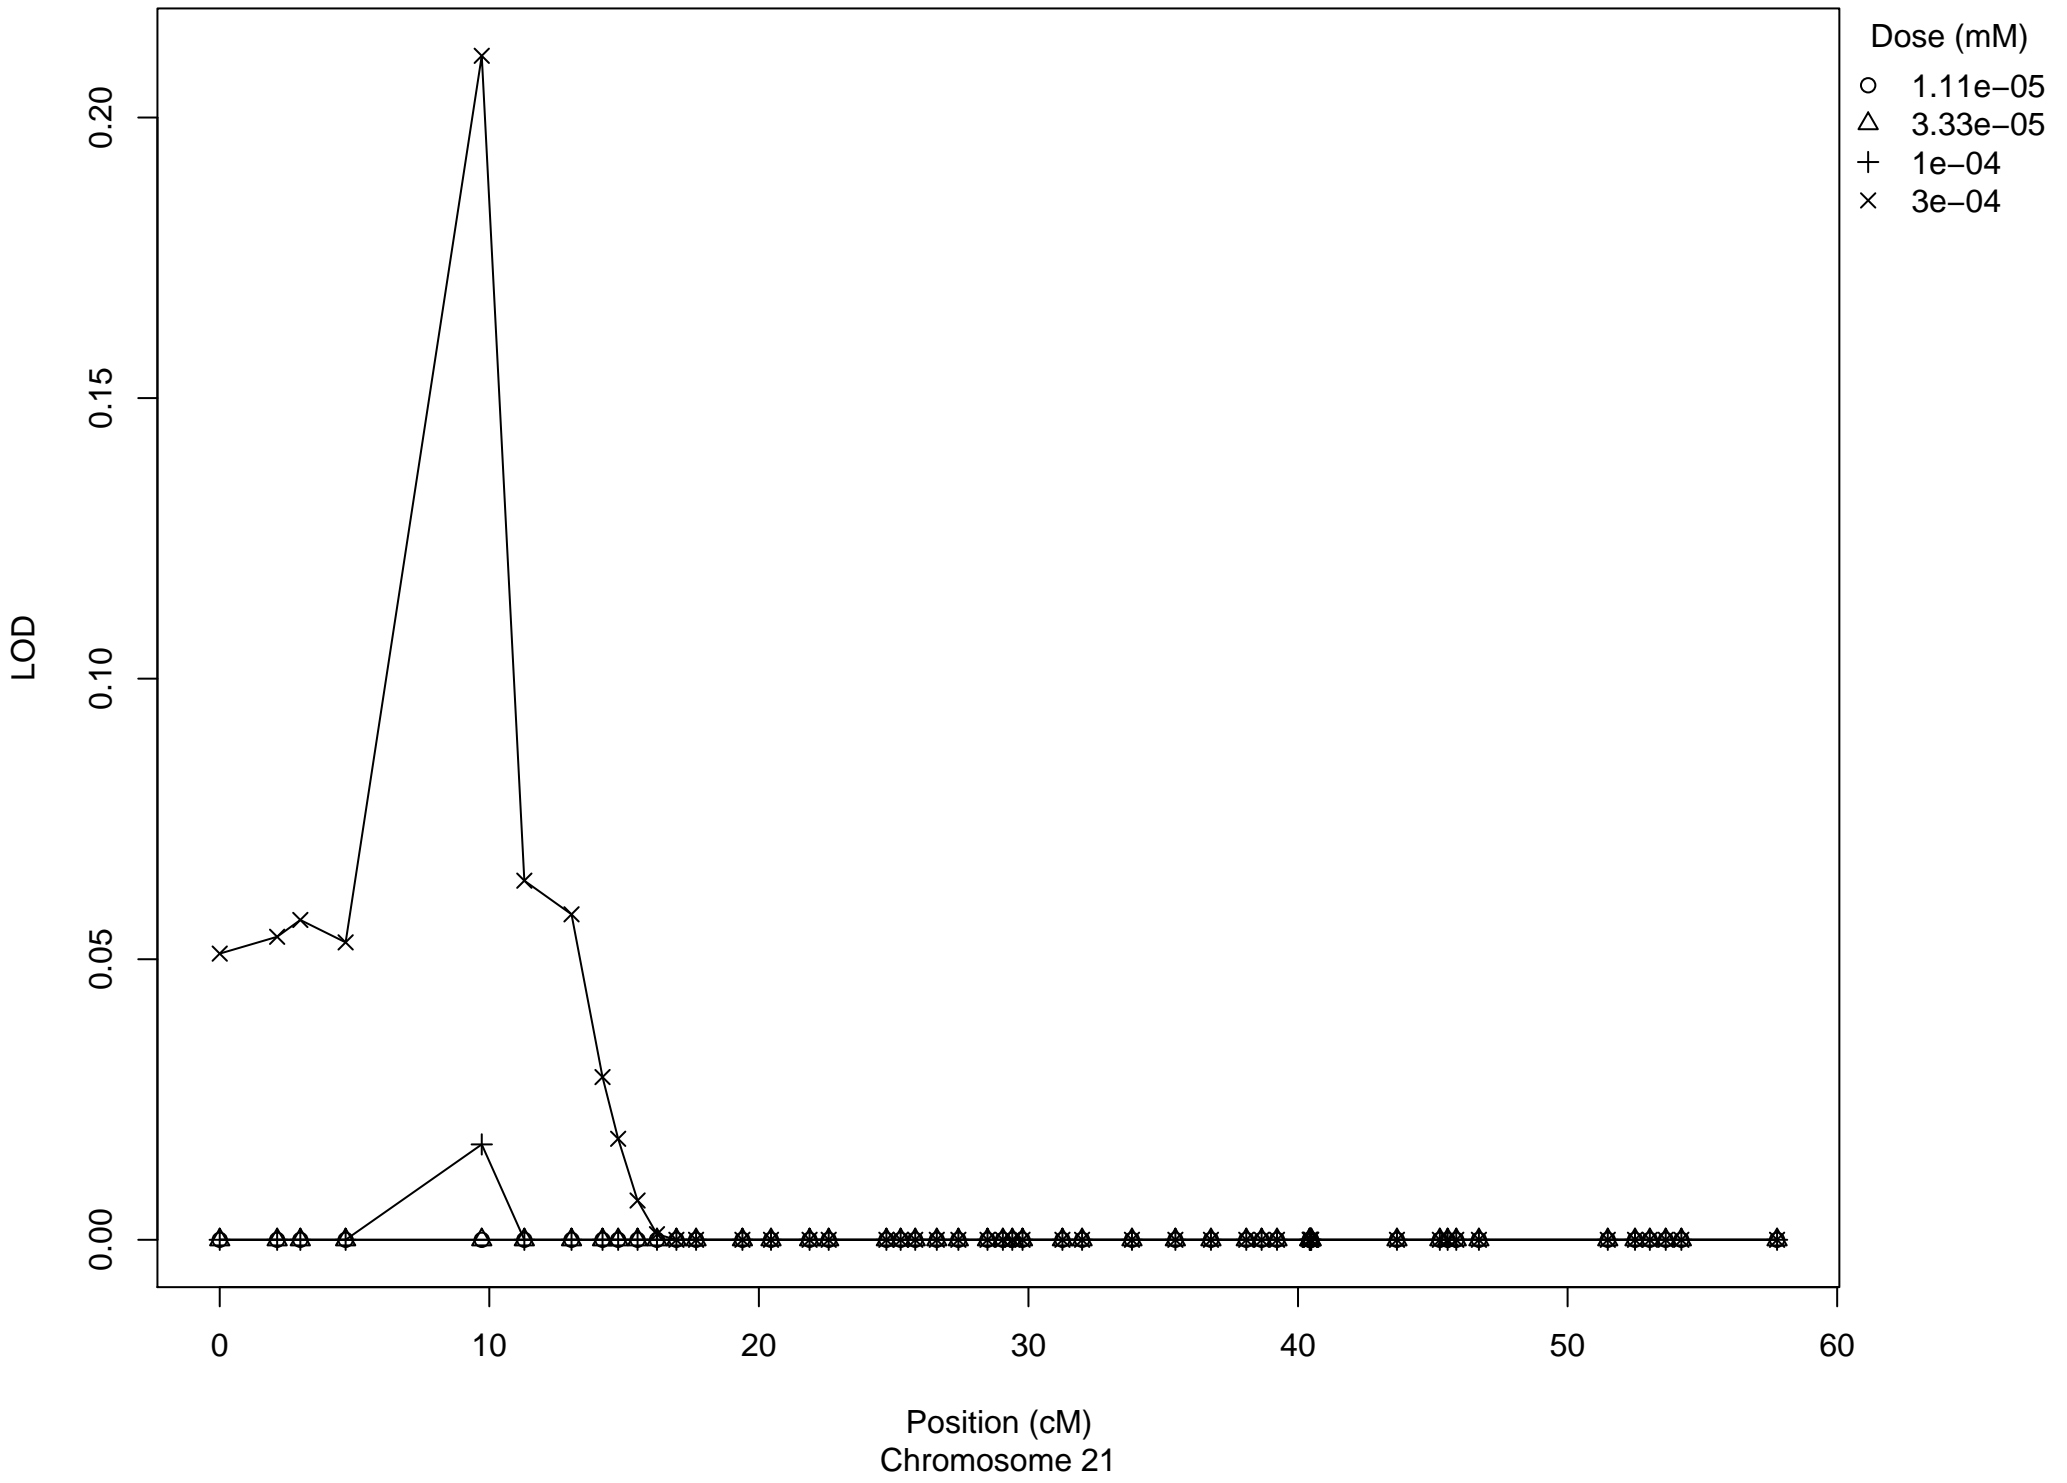

# Mitomycin C (Mitom)

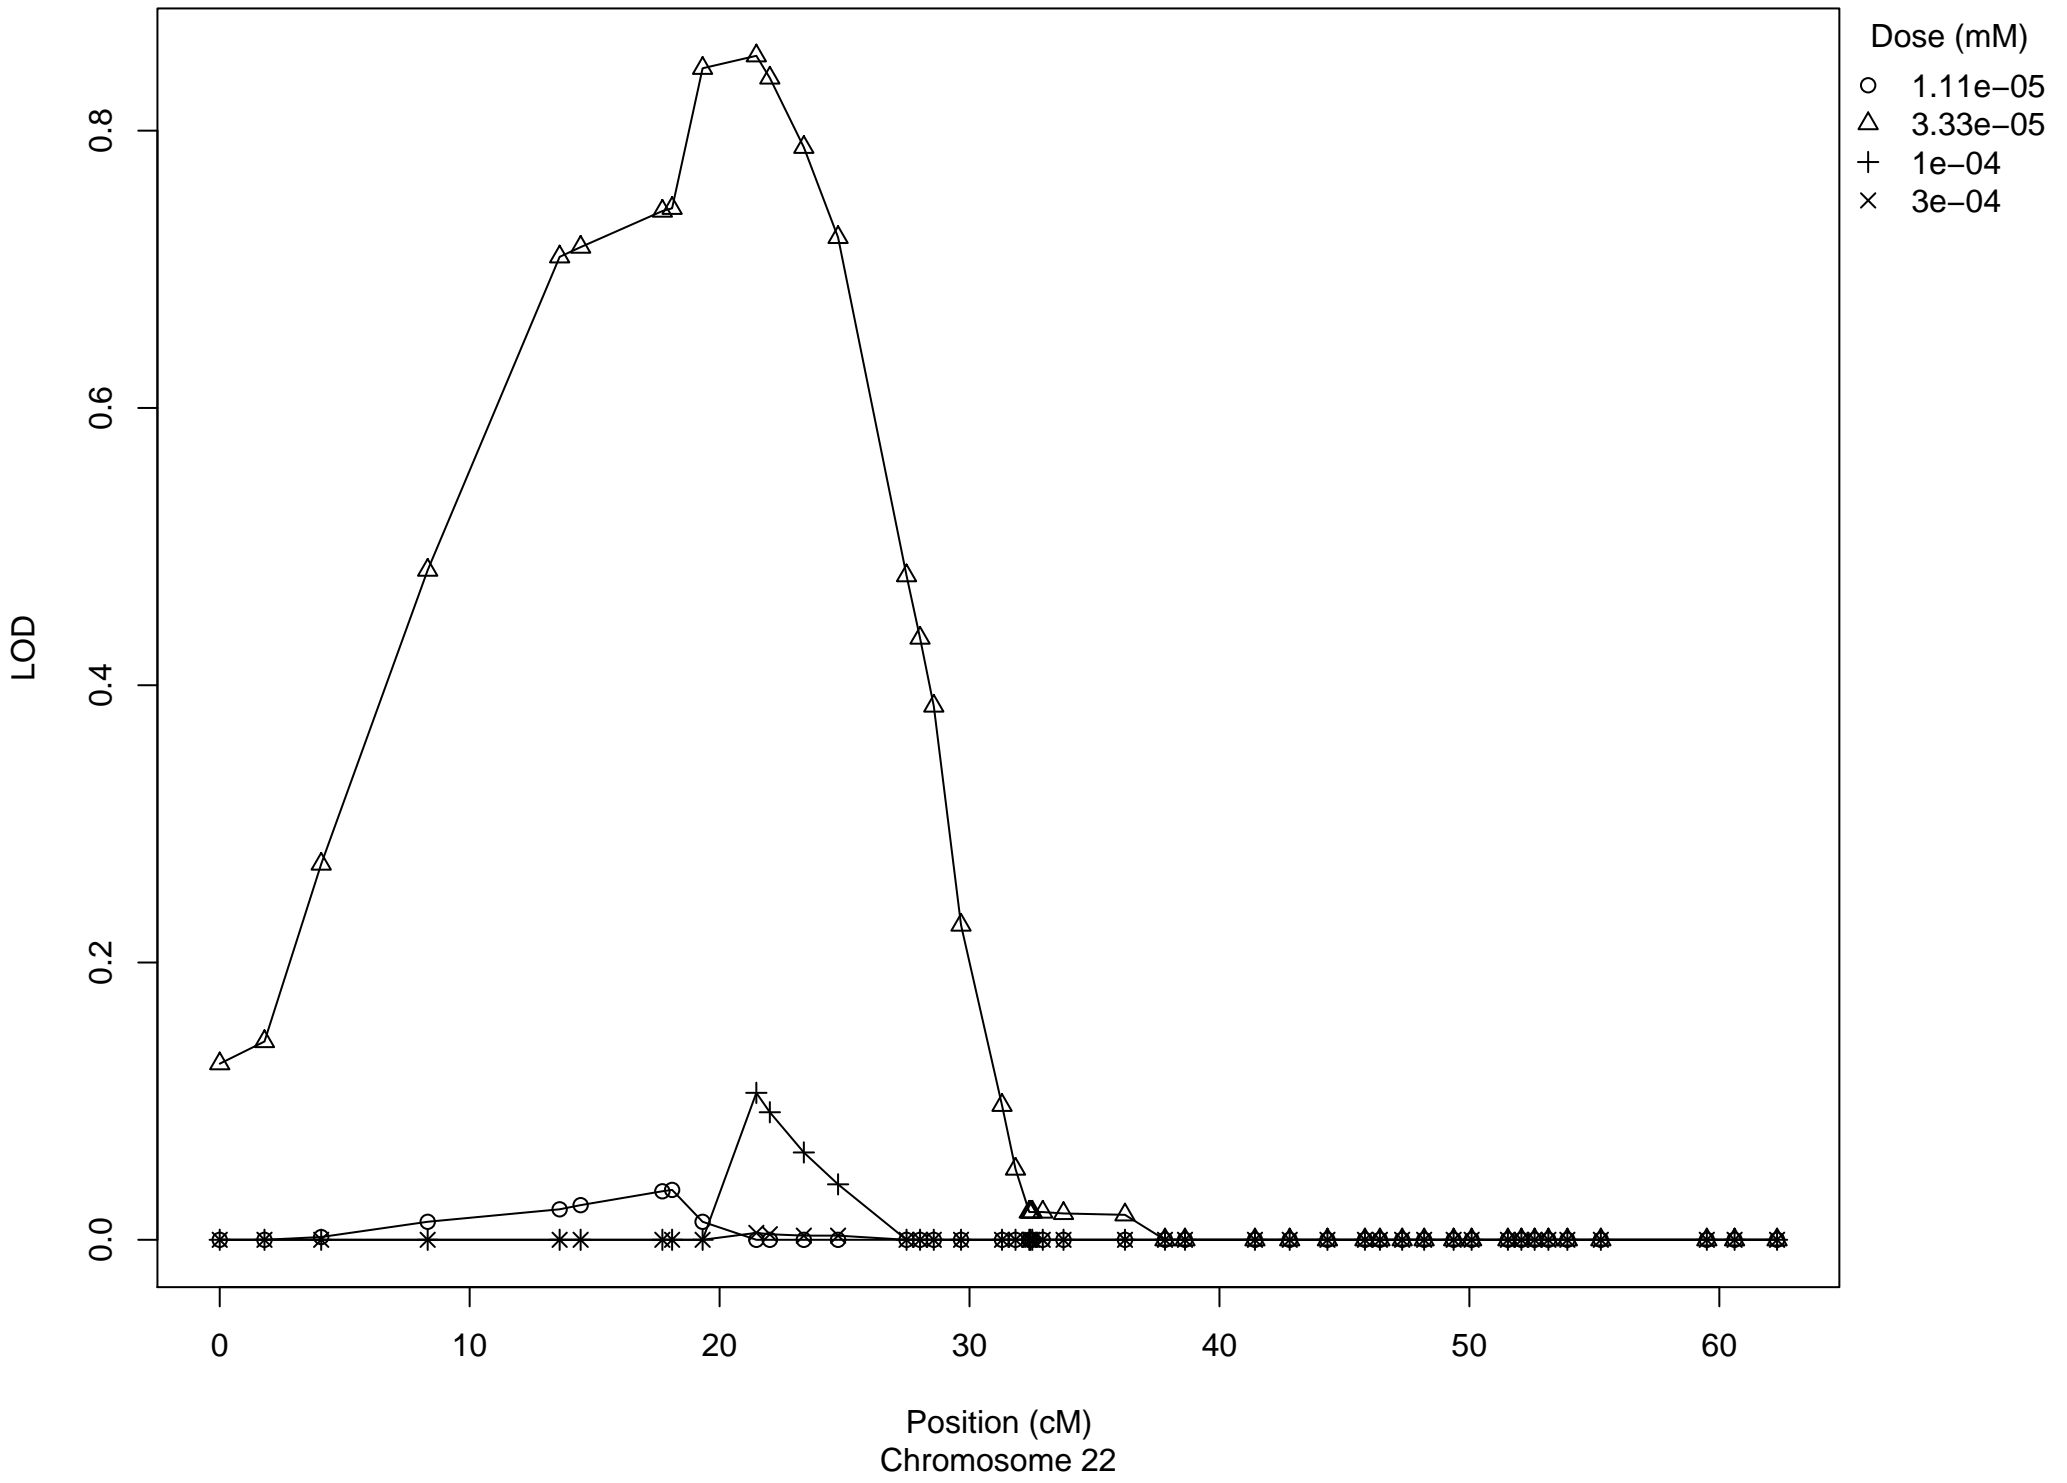

# Mitoxantrone dihydrochloride (Mitox)

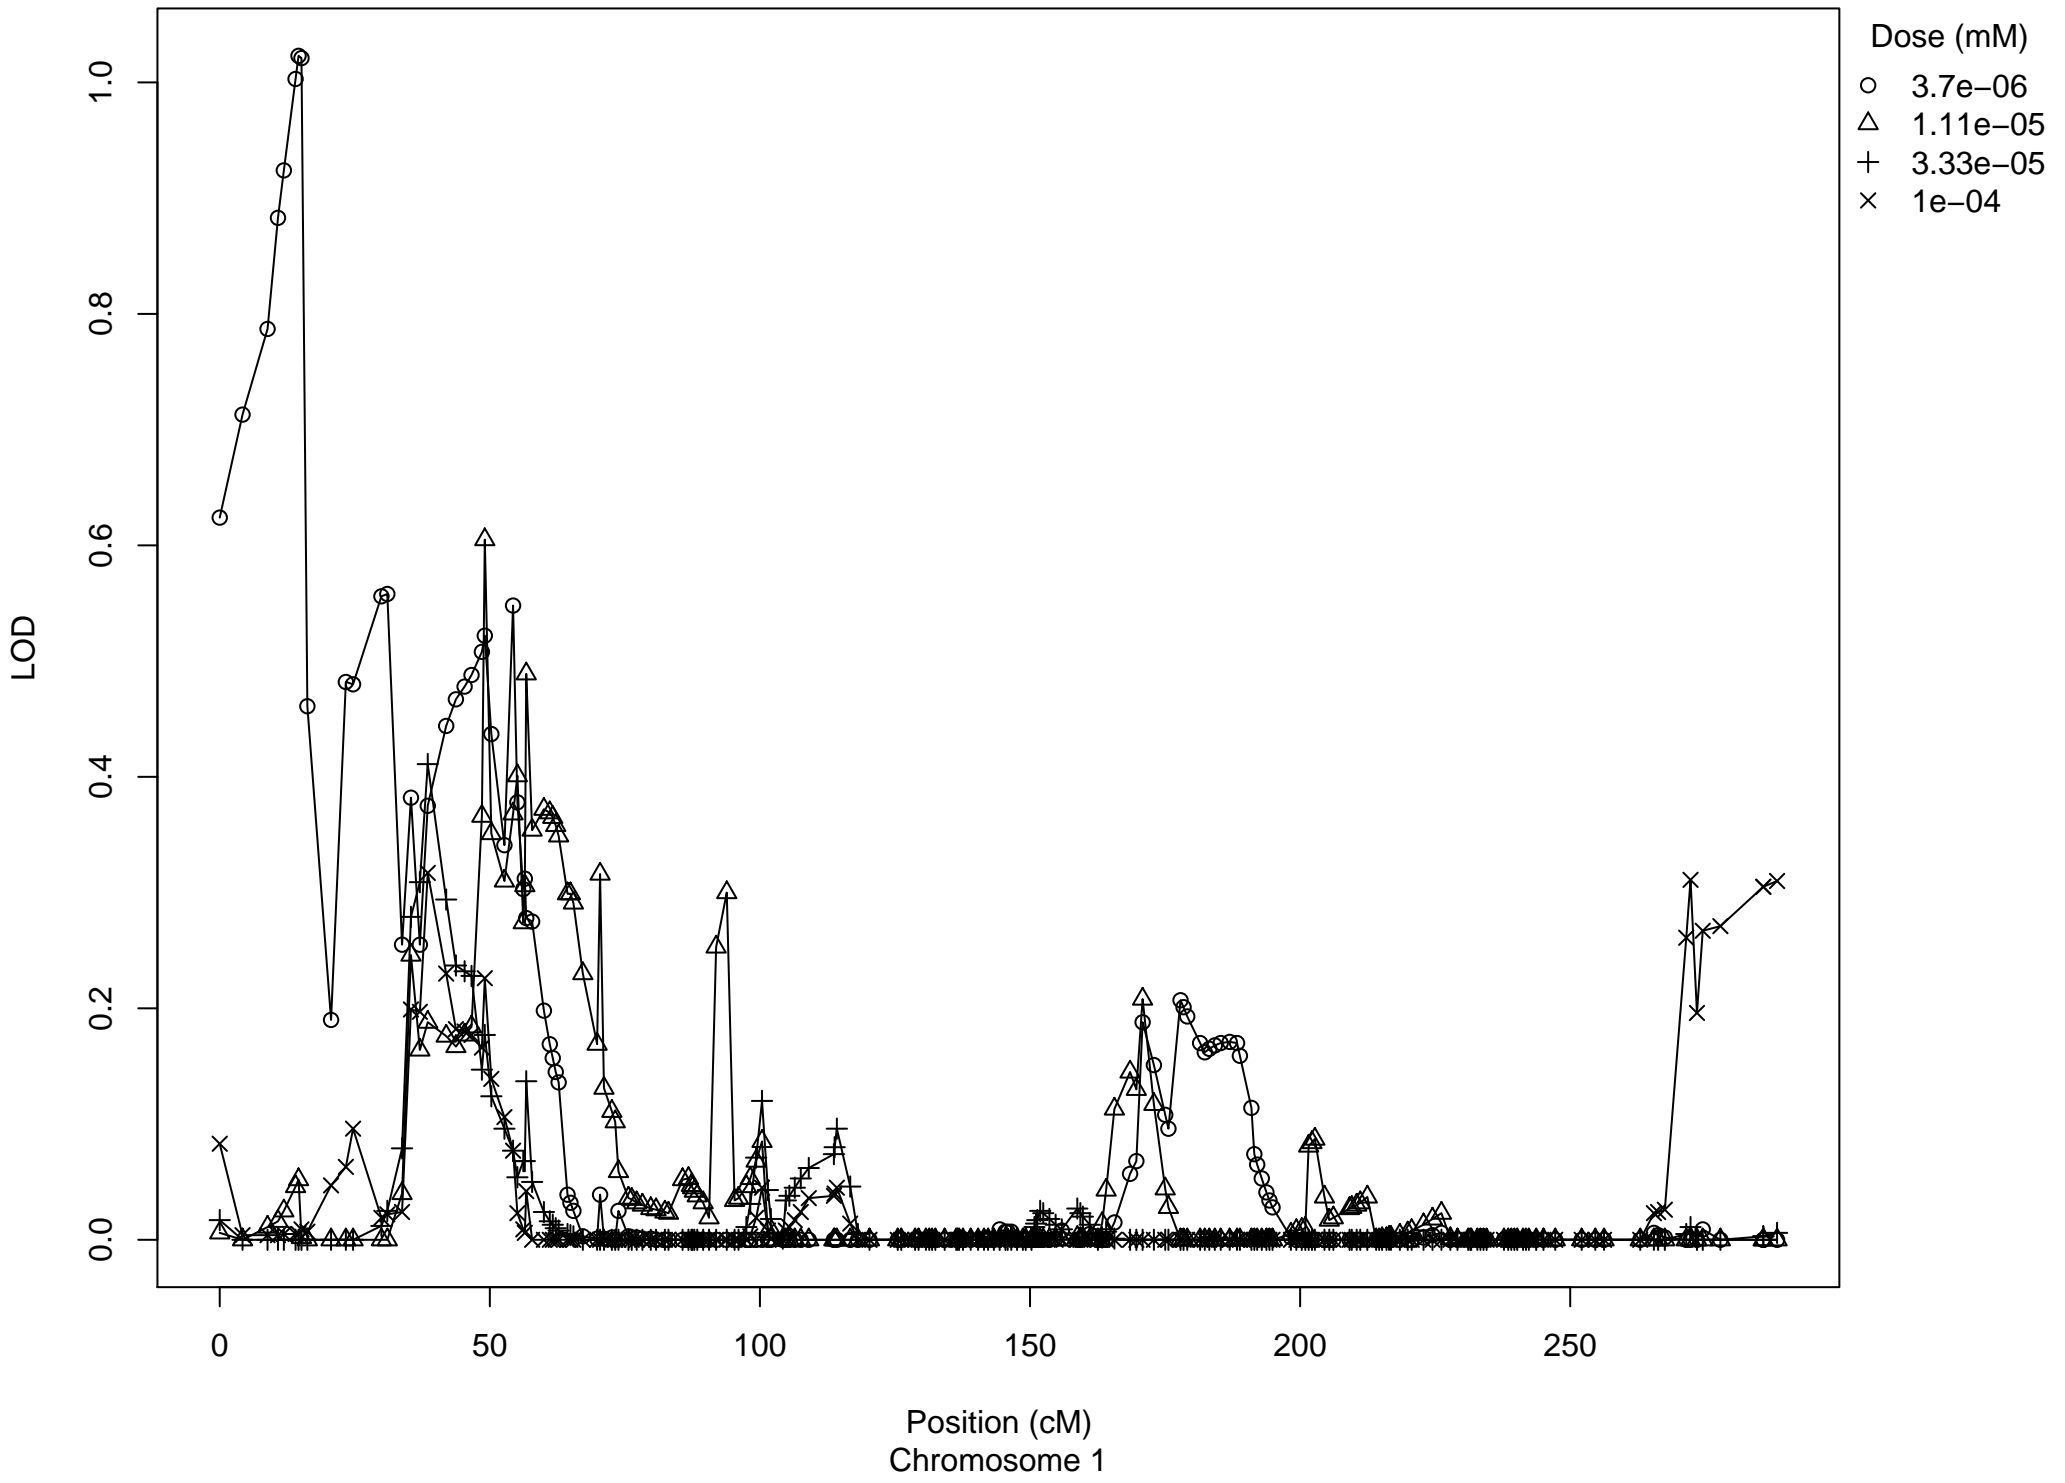

# Mitoxantrone dihydrochloride (Mitox)

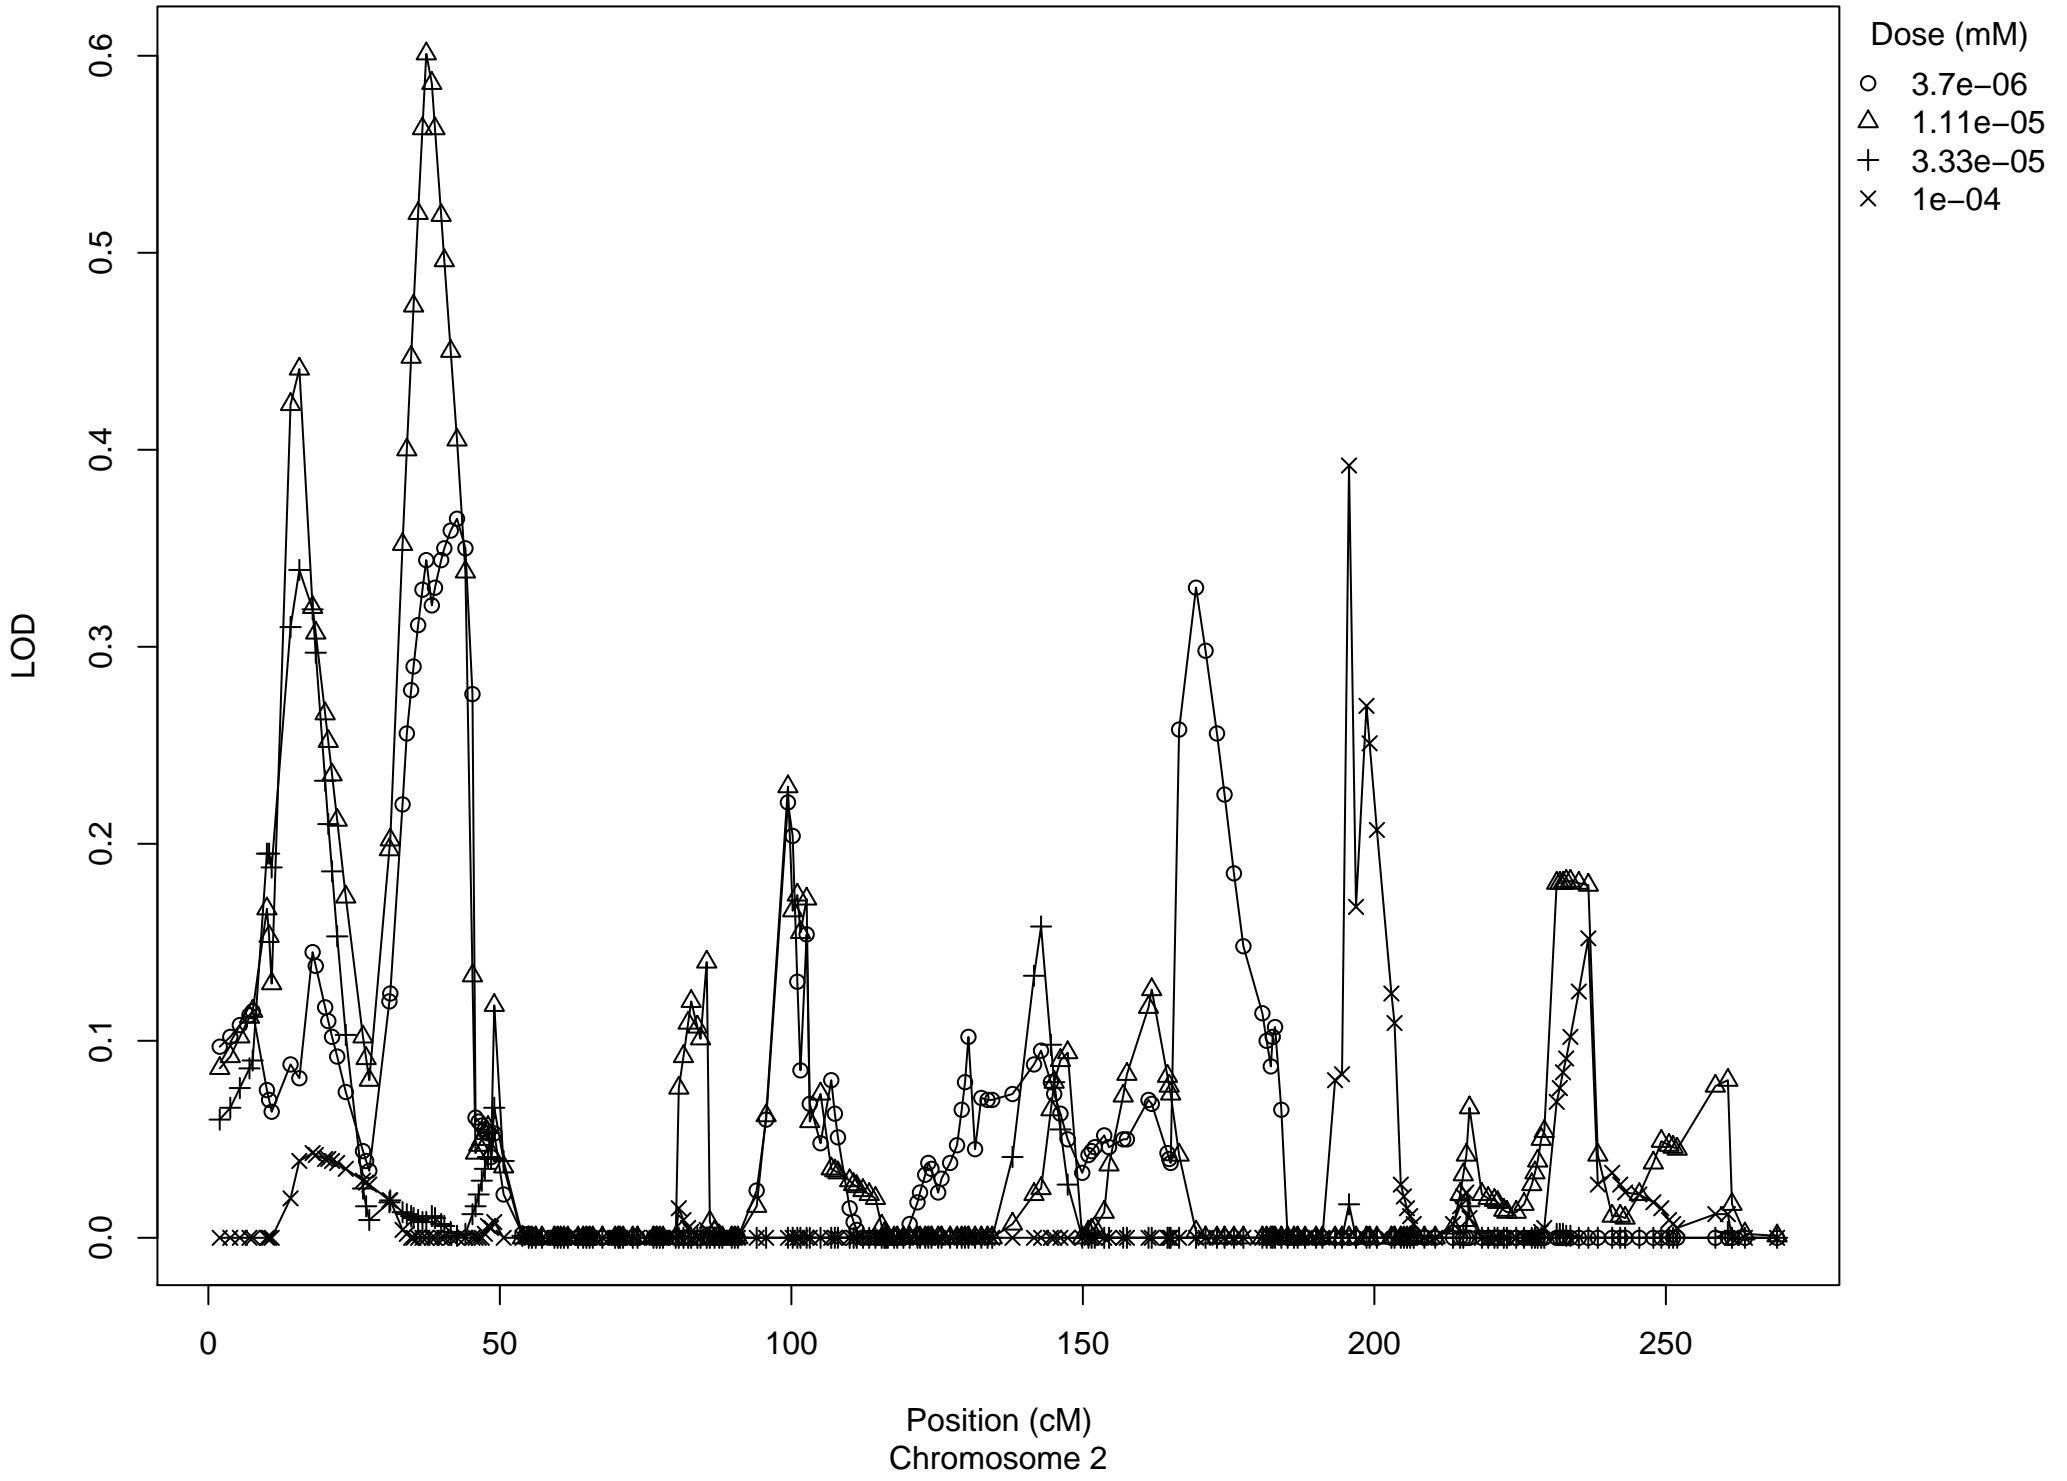

# Mitoxantrone dihydrochloride (Mitox)

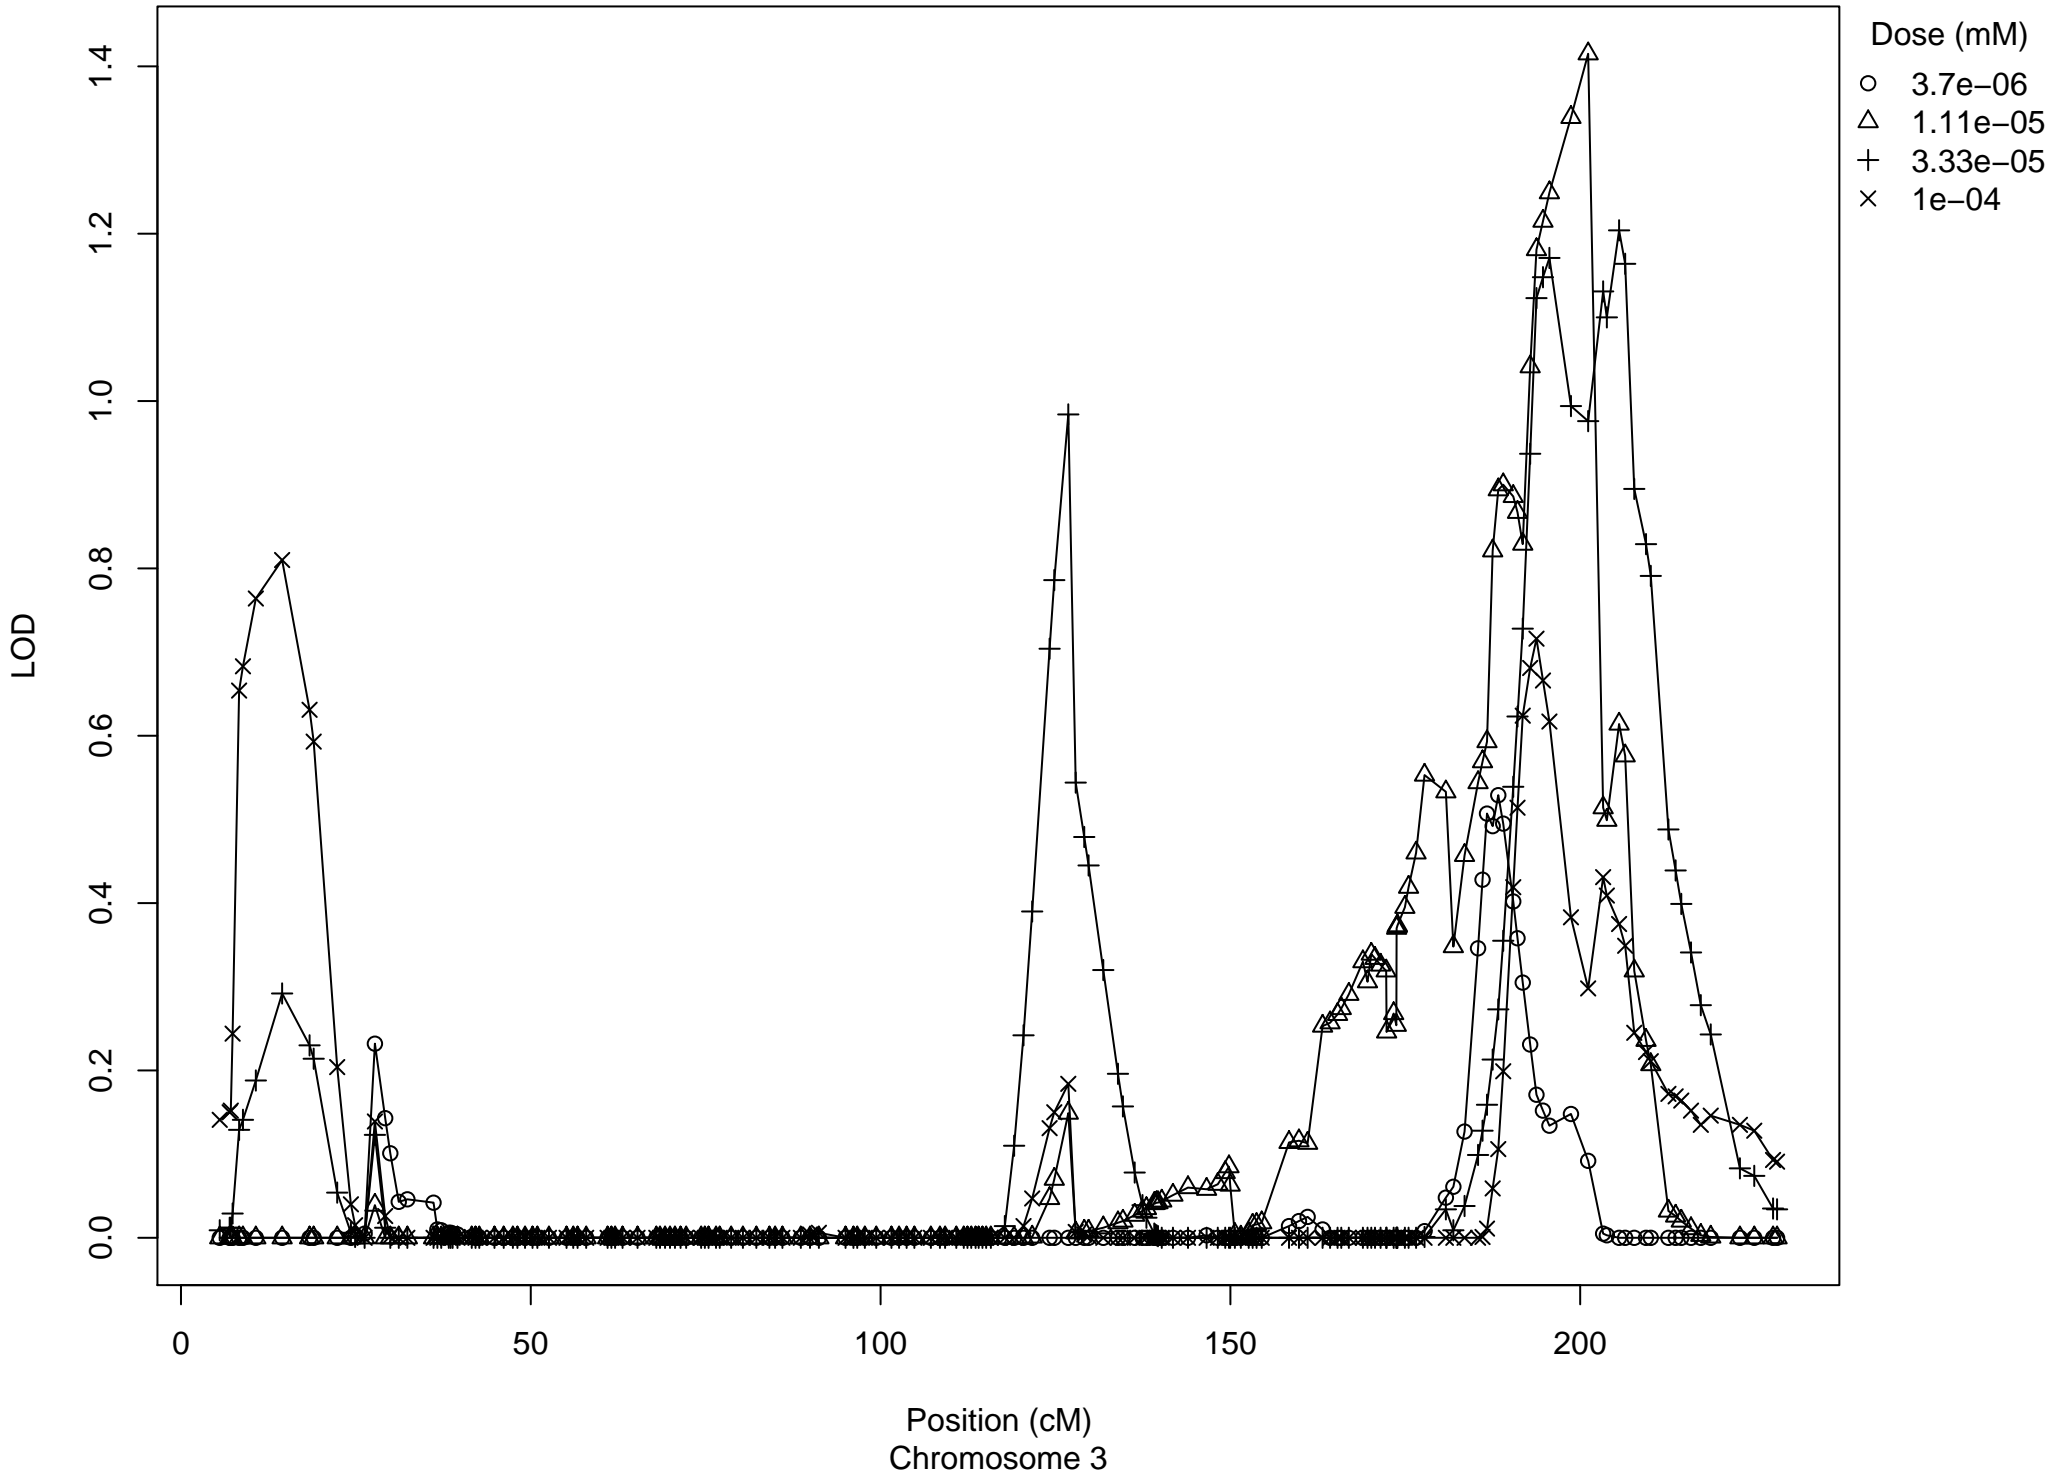

# Mitoxantrone dihydrochloride (Mitox)

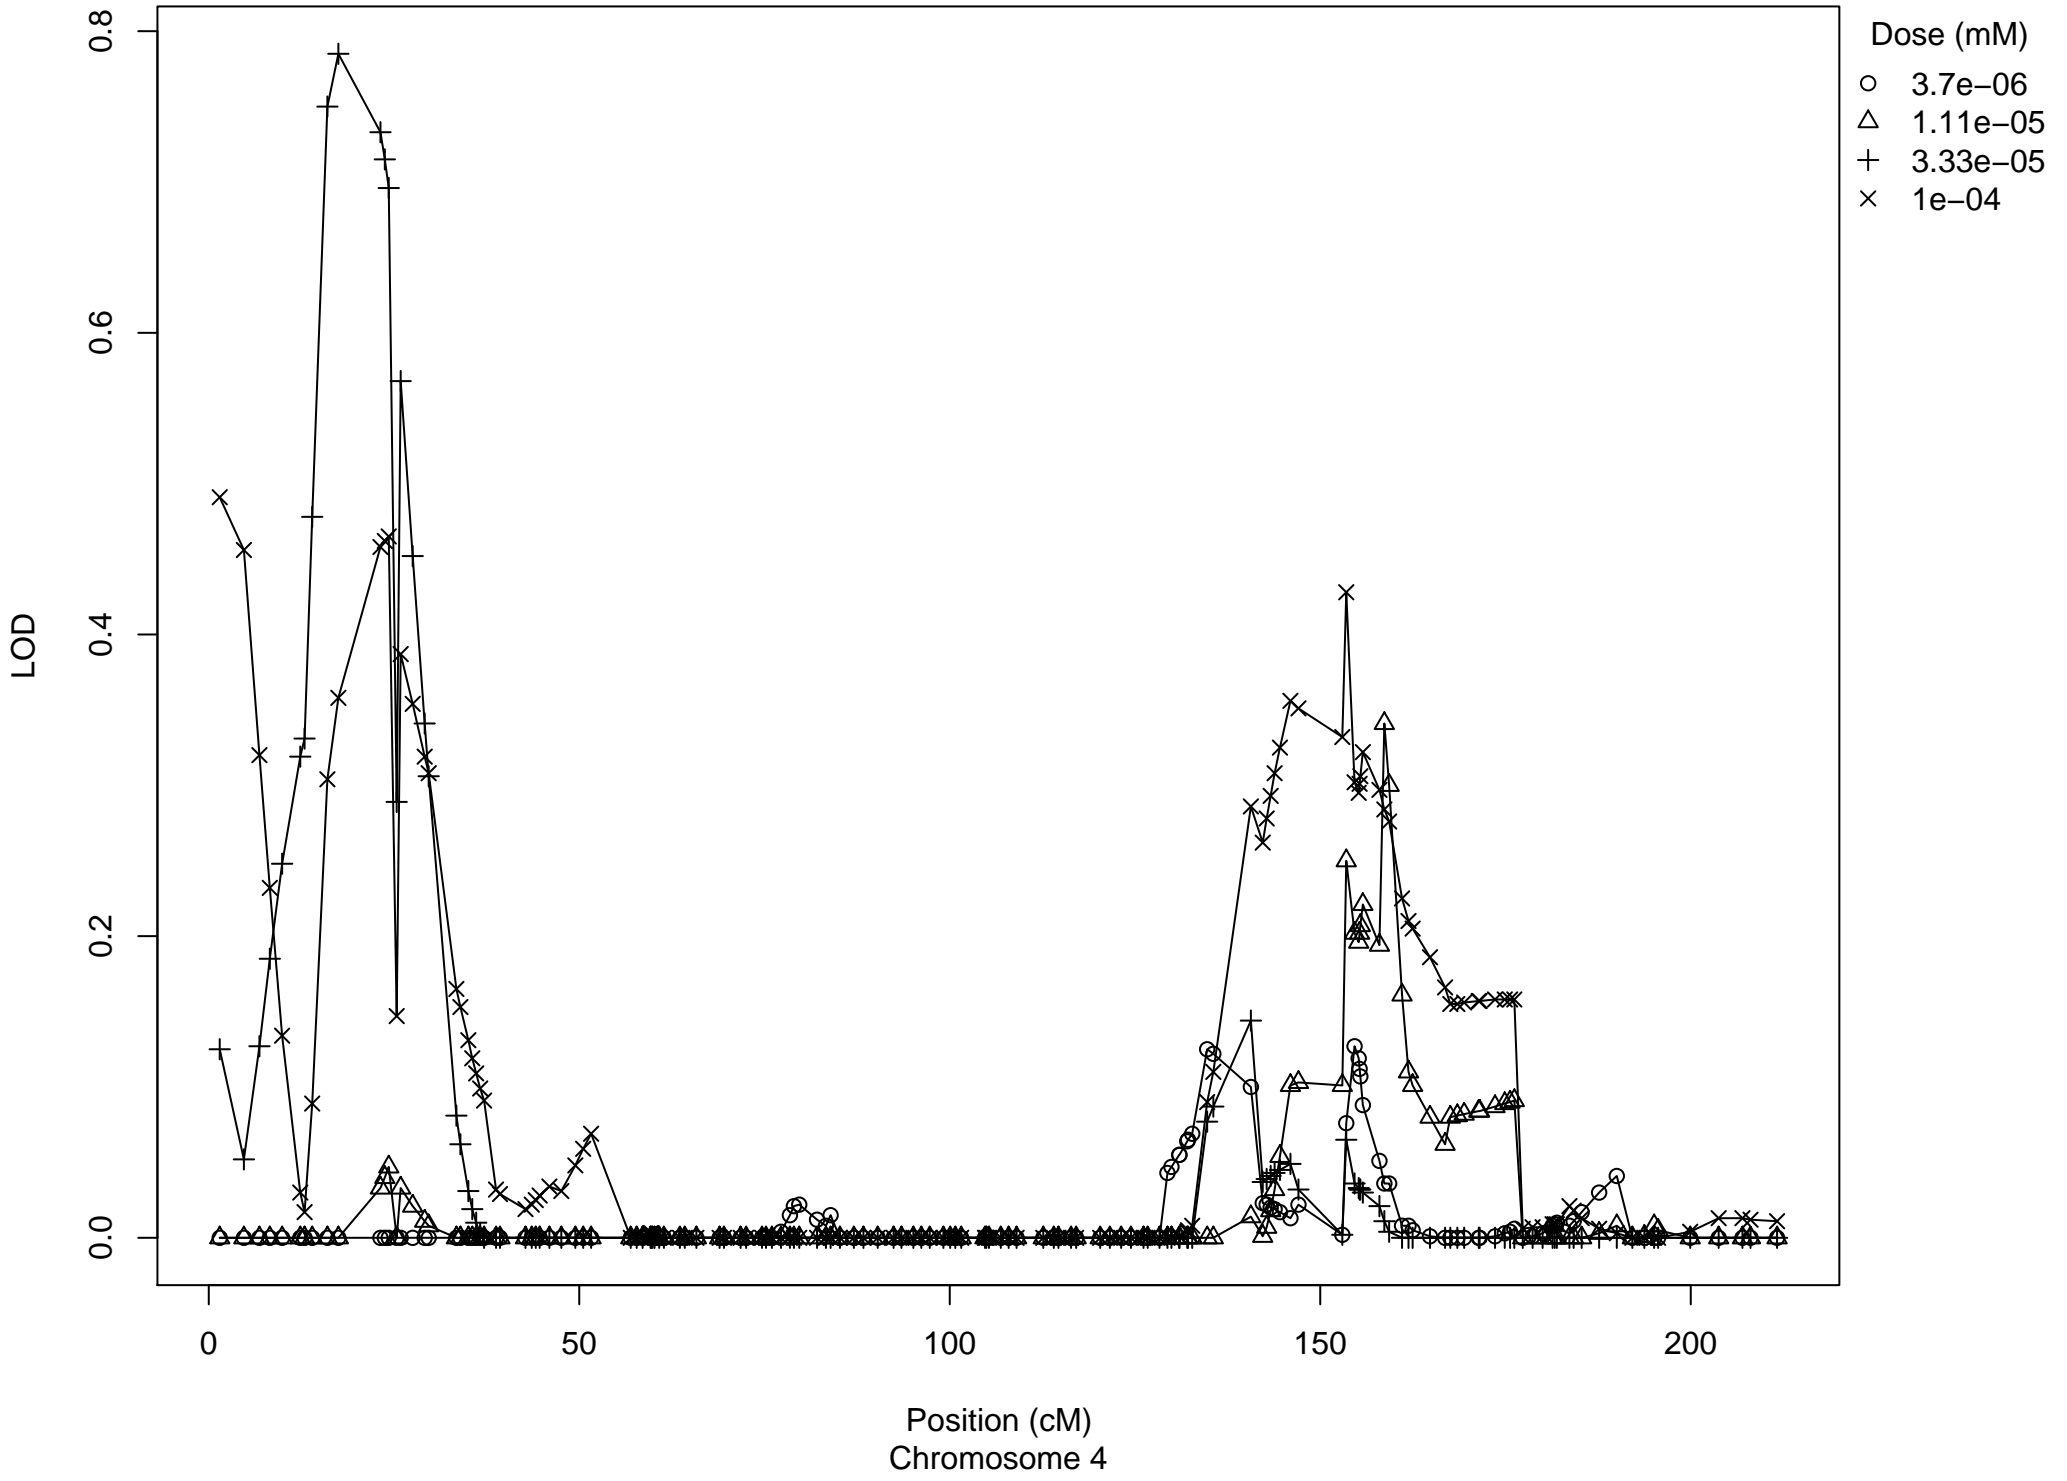

# Mitoxantrone dihydrochloride (Mitox)

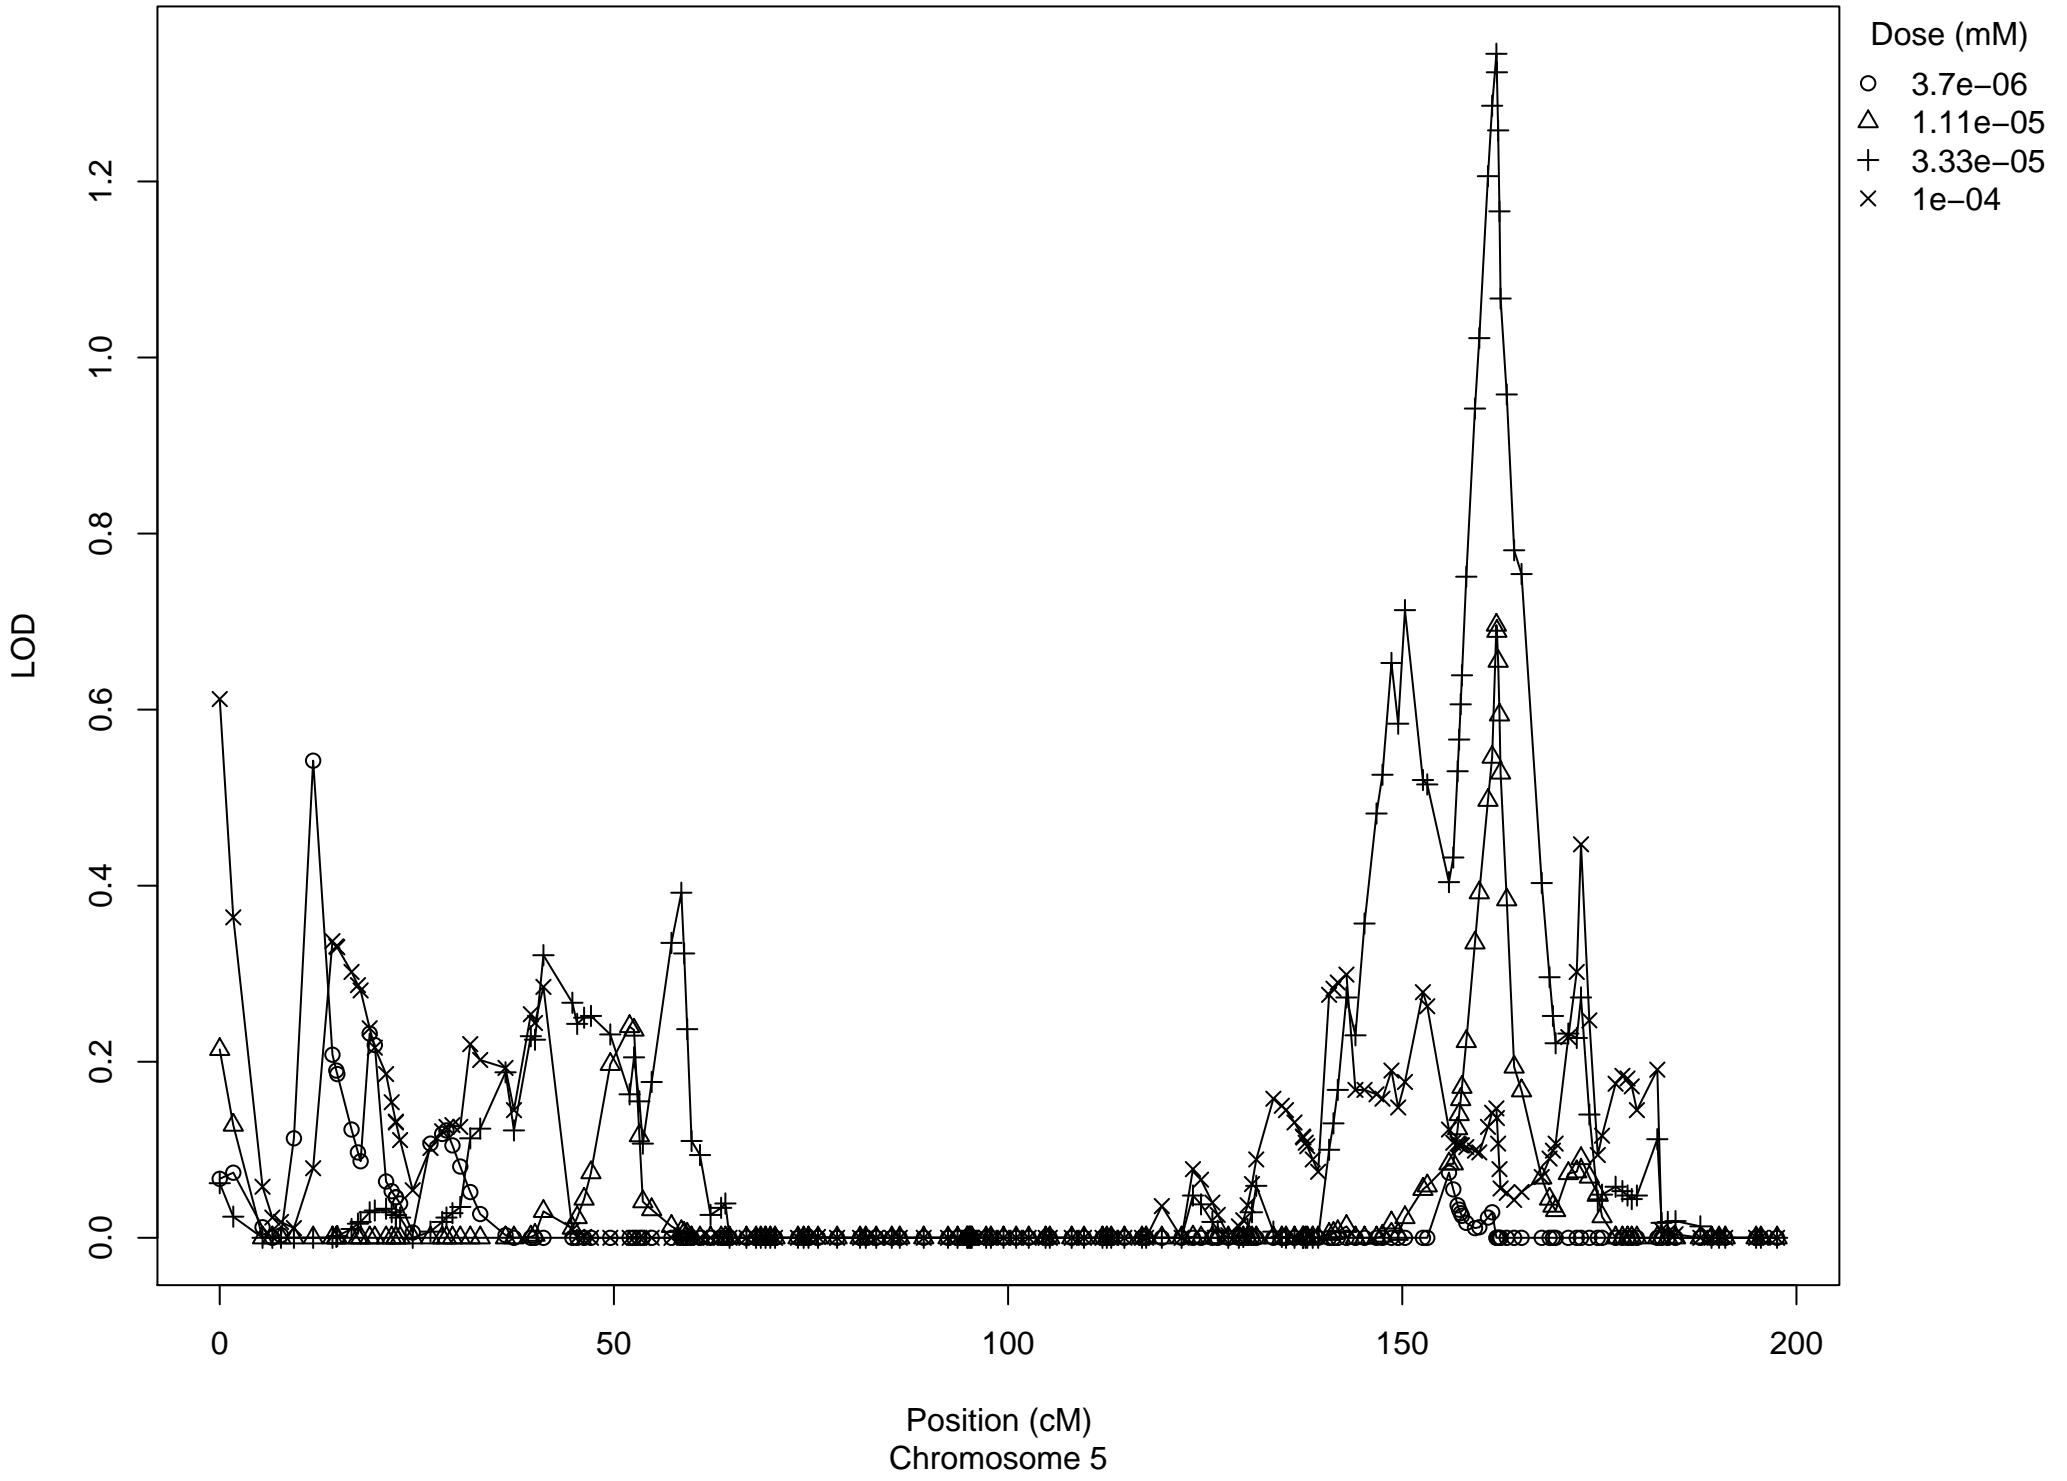

# Mitoxantrone dihydrochloride (Mitox)

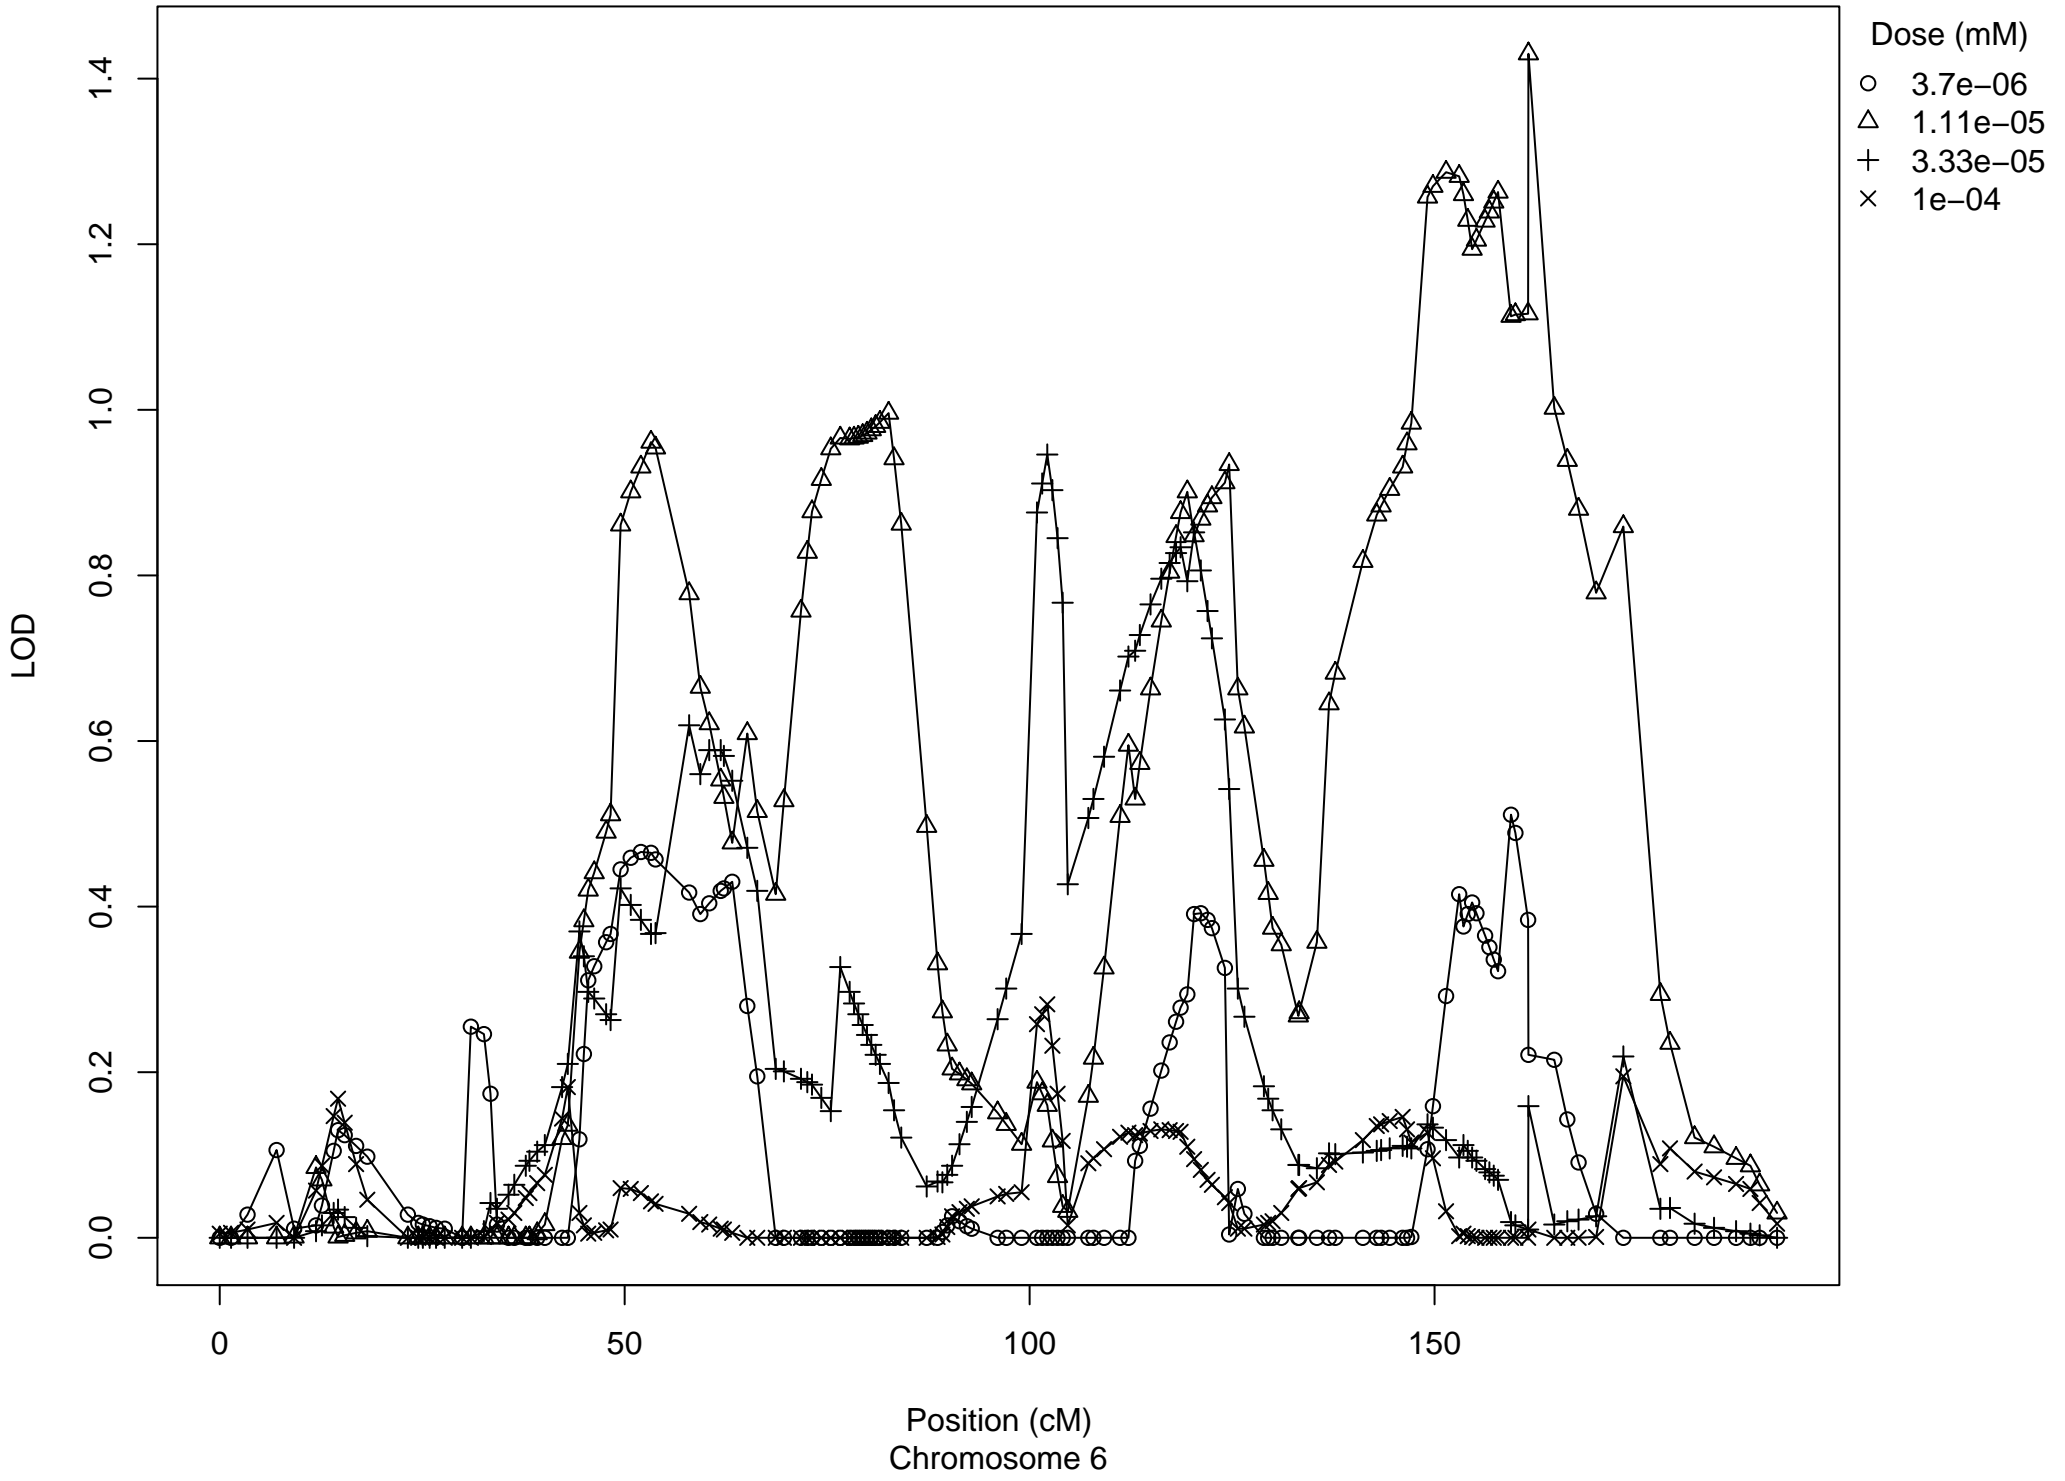



# Mitoxantrone dihydrochloride (Mitox)

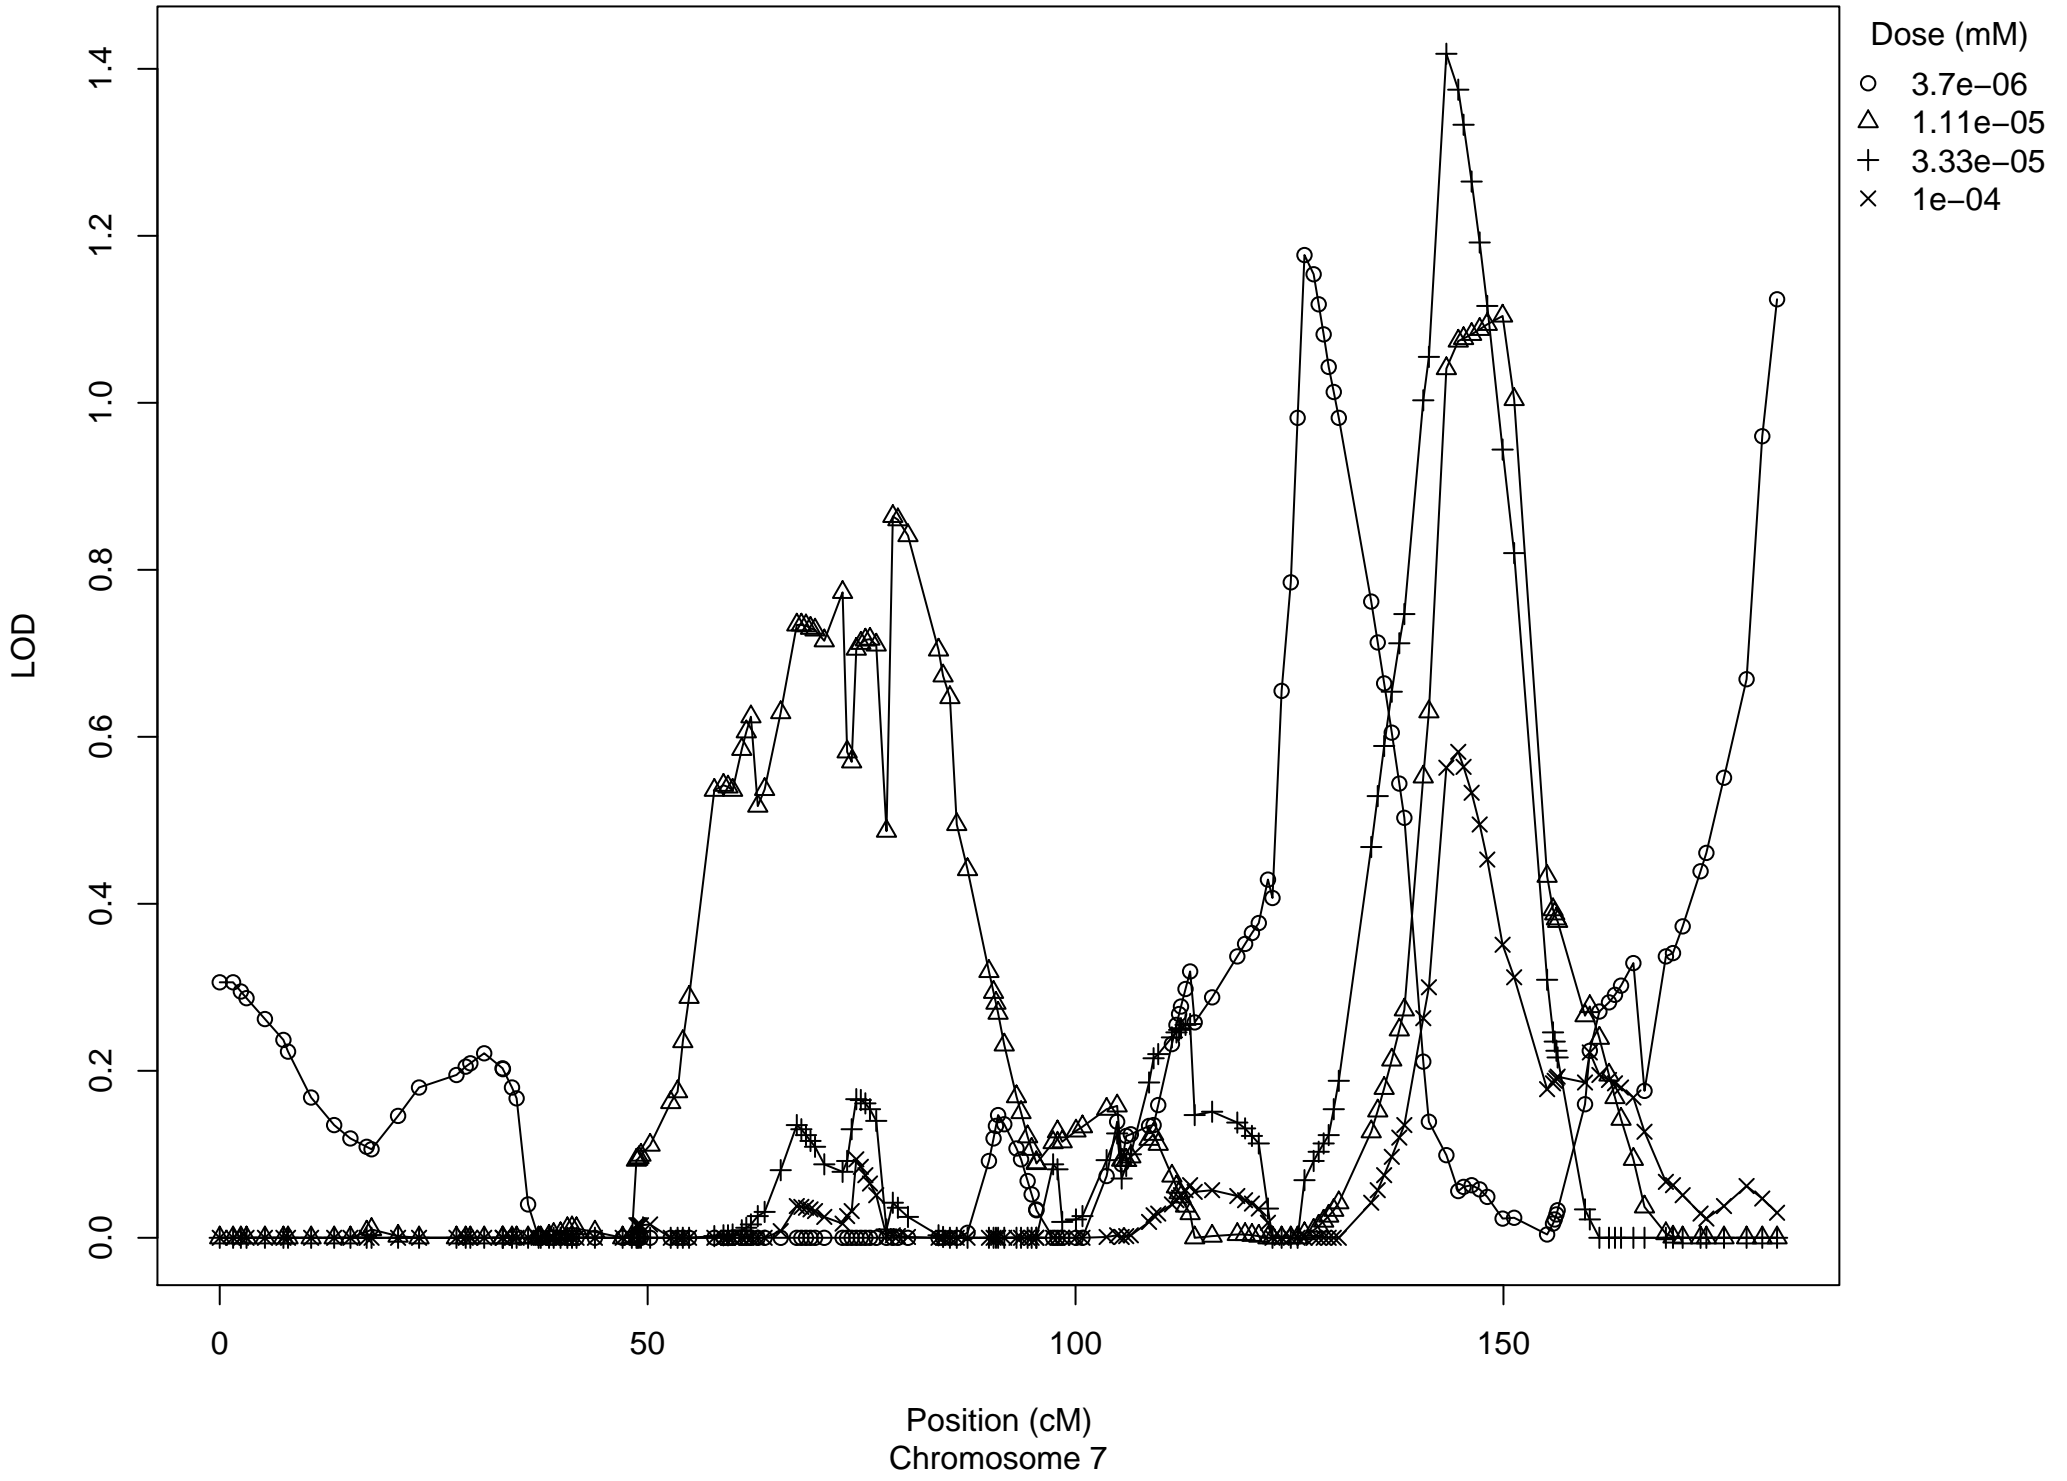

# Mitoxantrone dihydrochloride (Mitox)

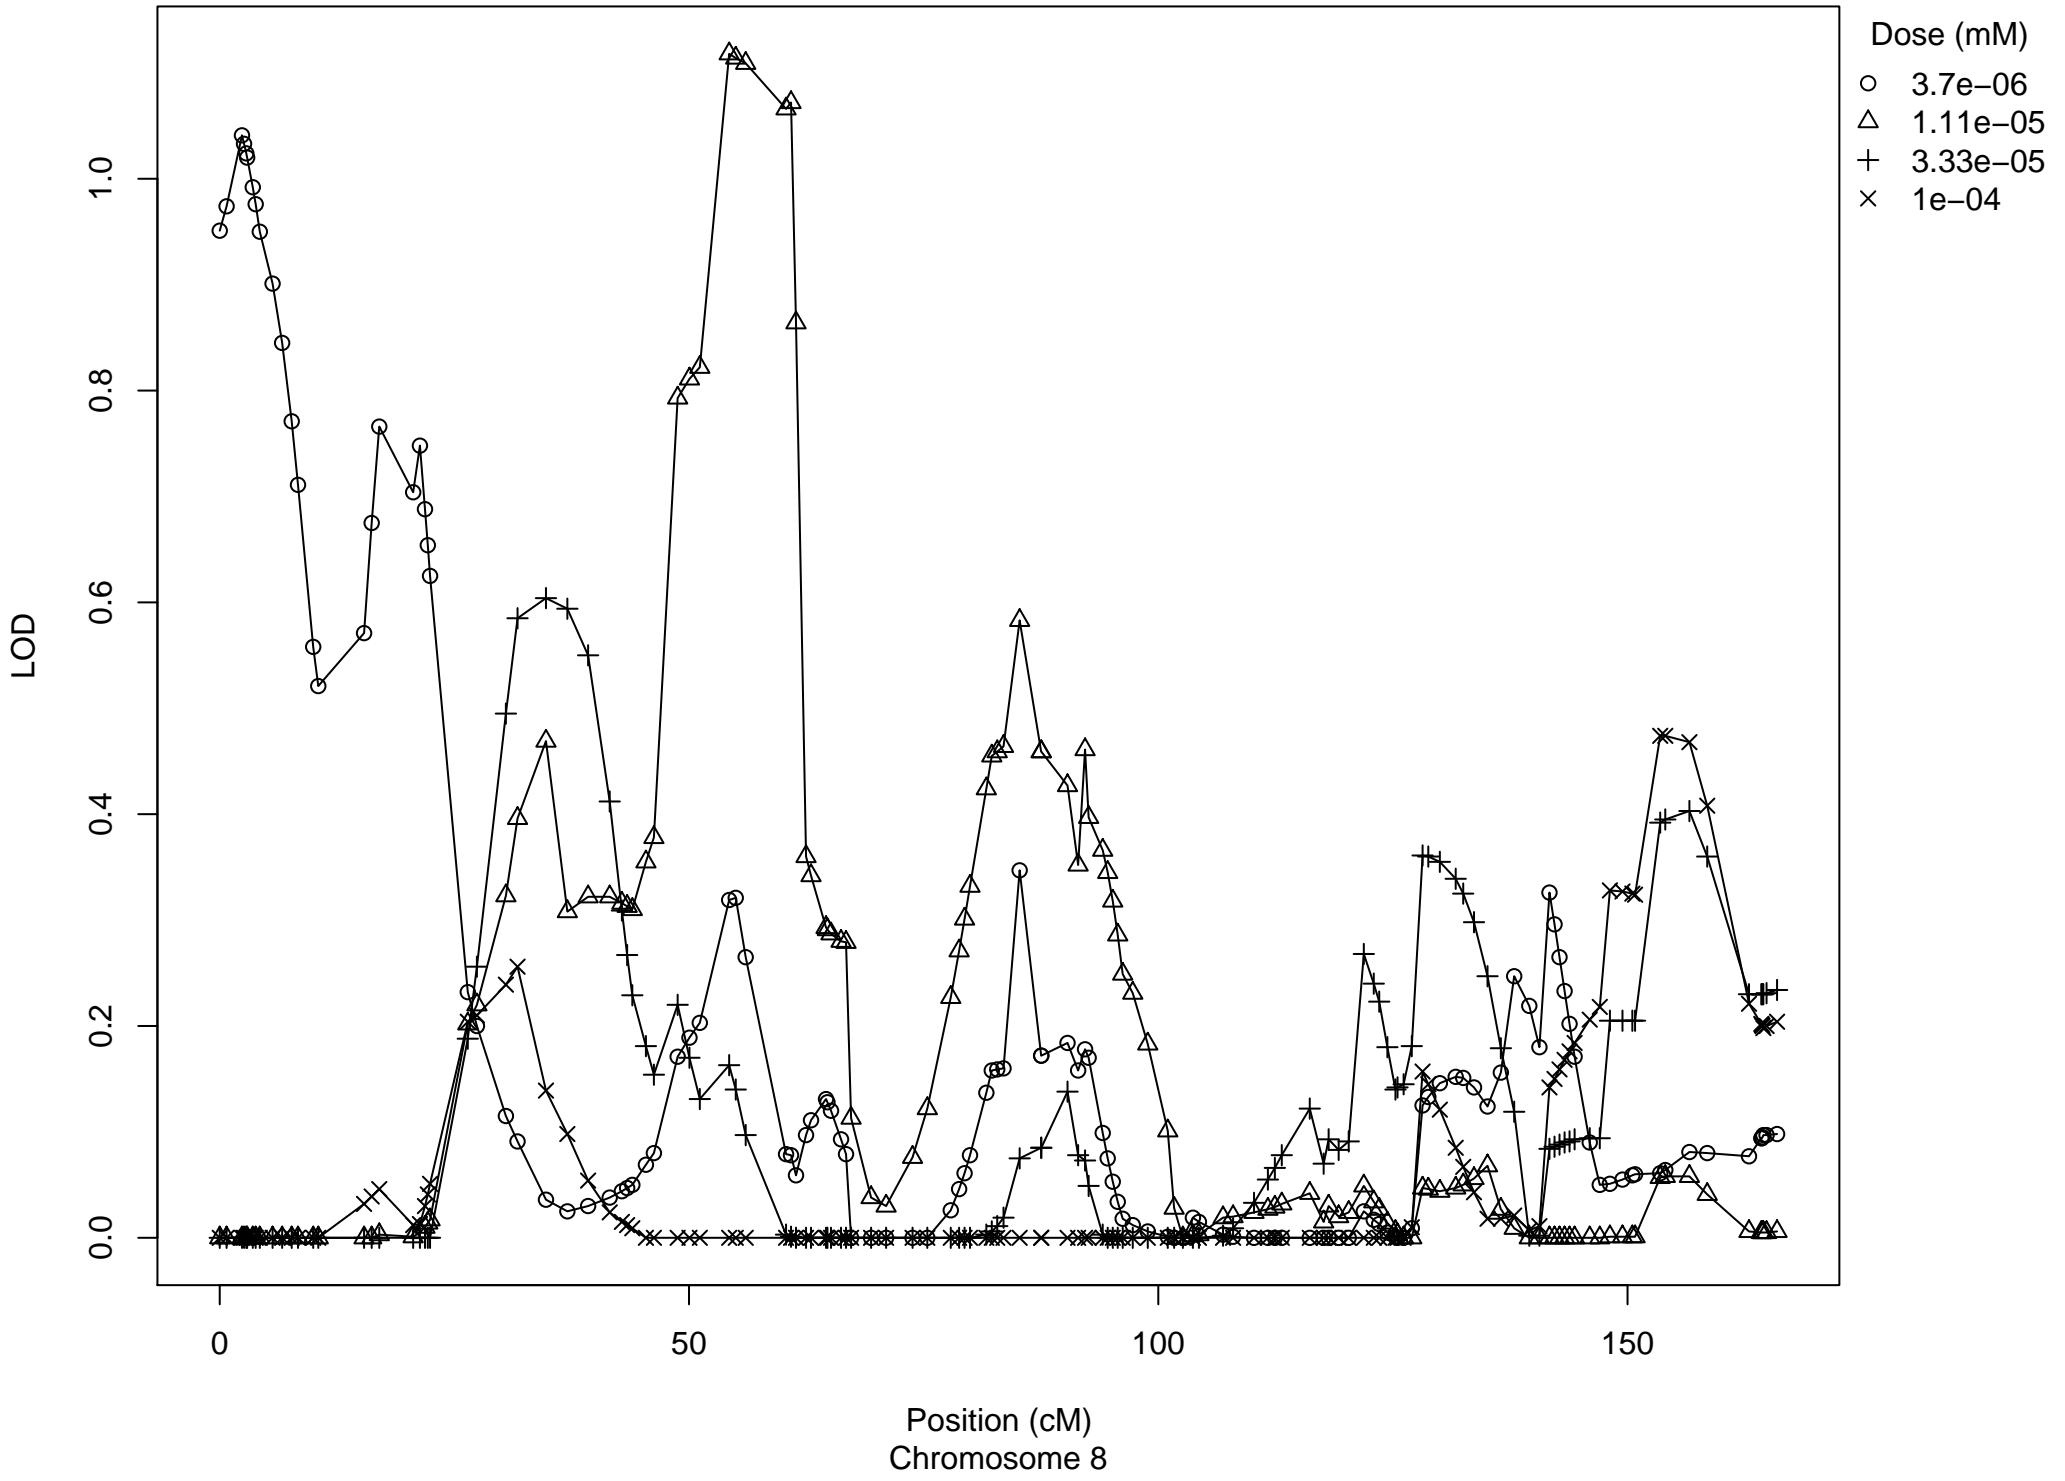

# Mitoxantrone dihydrochloride (Mitox)

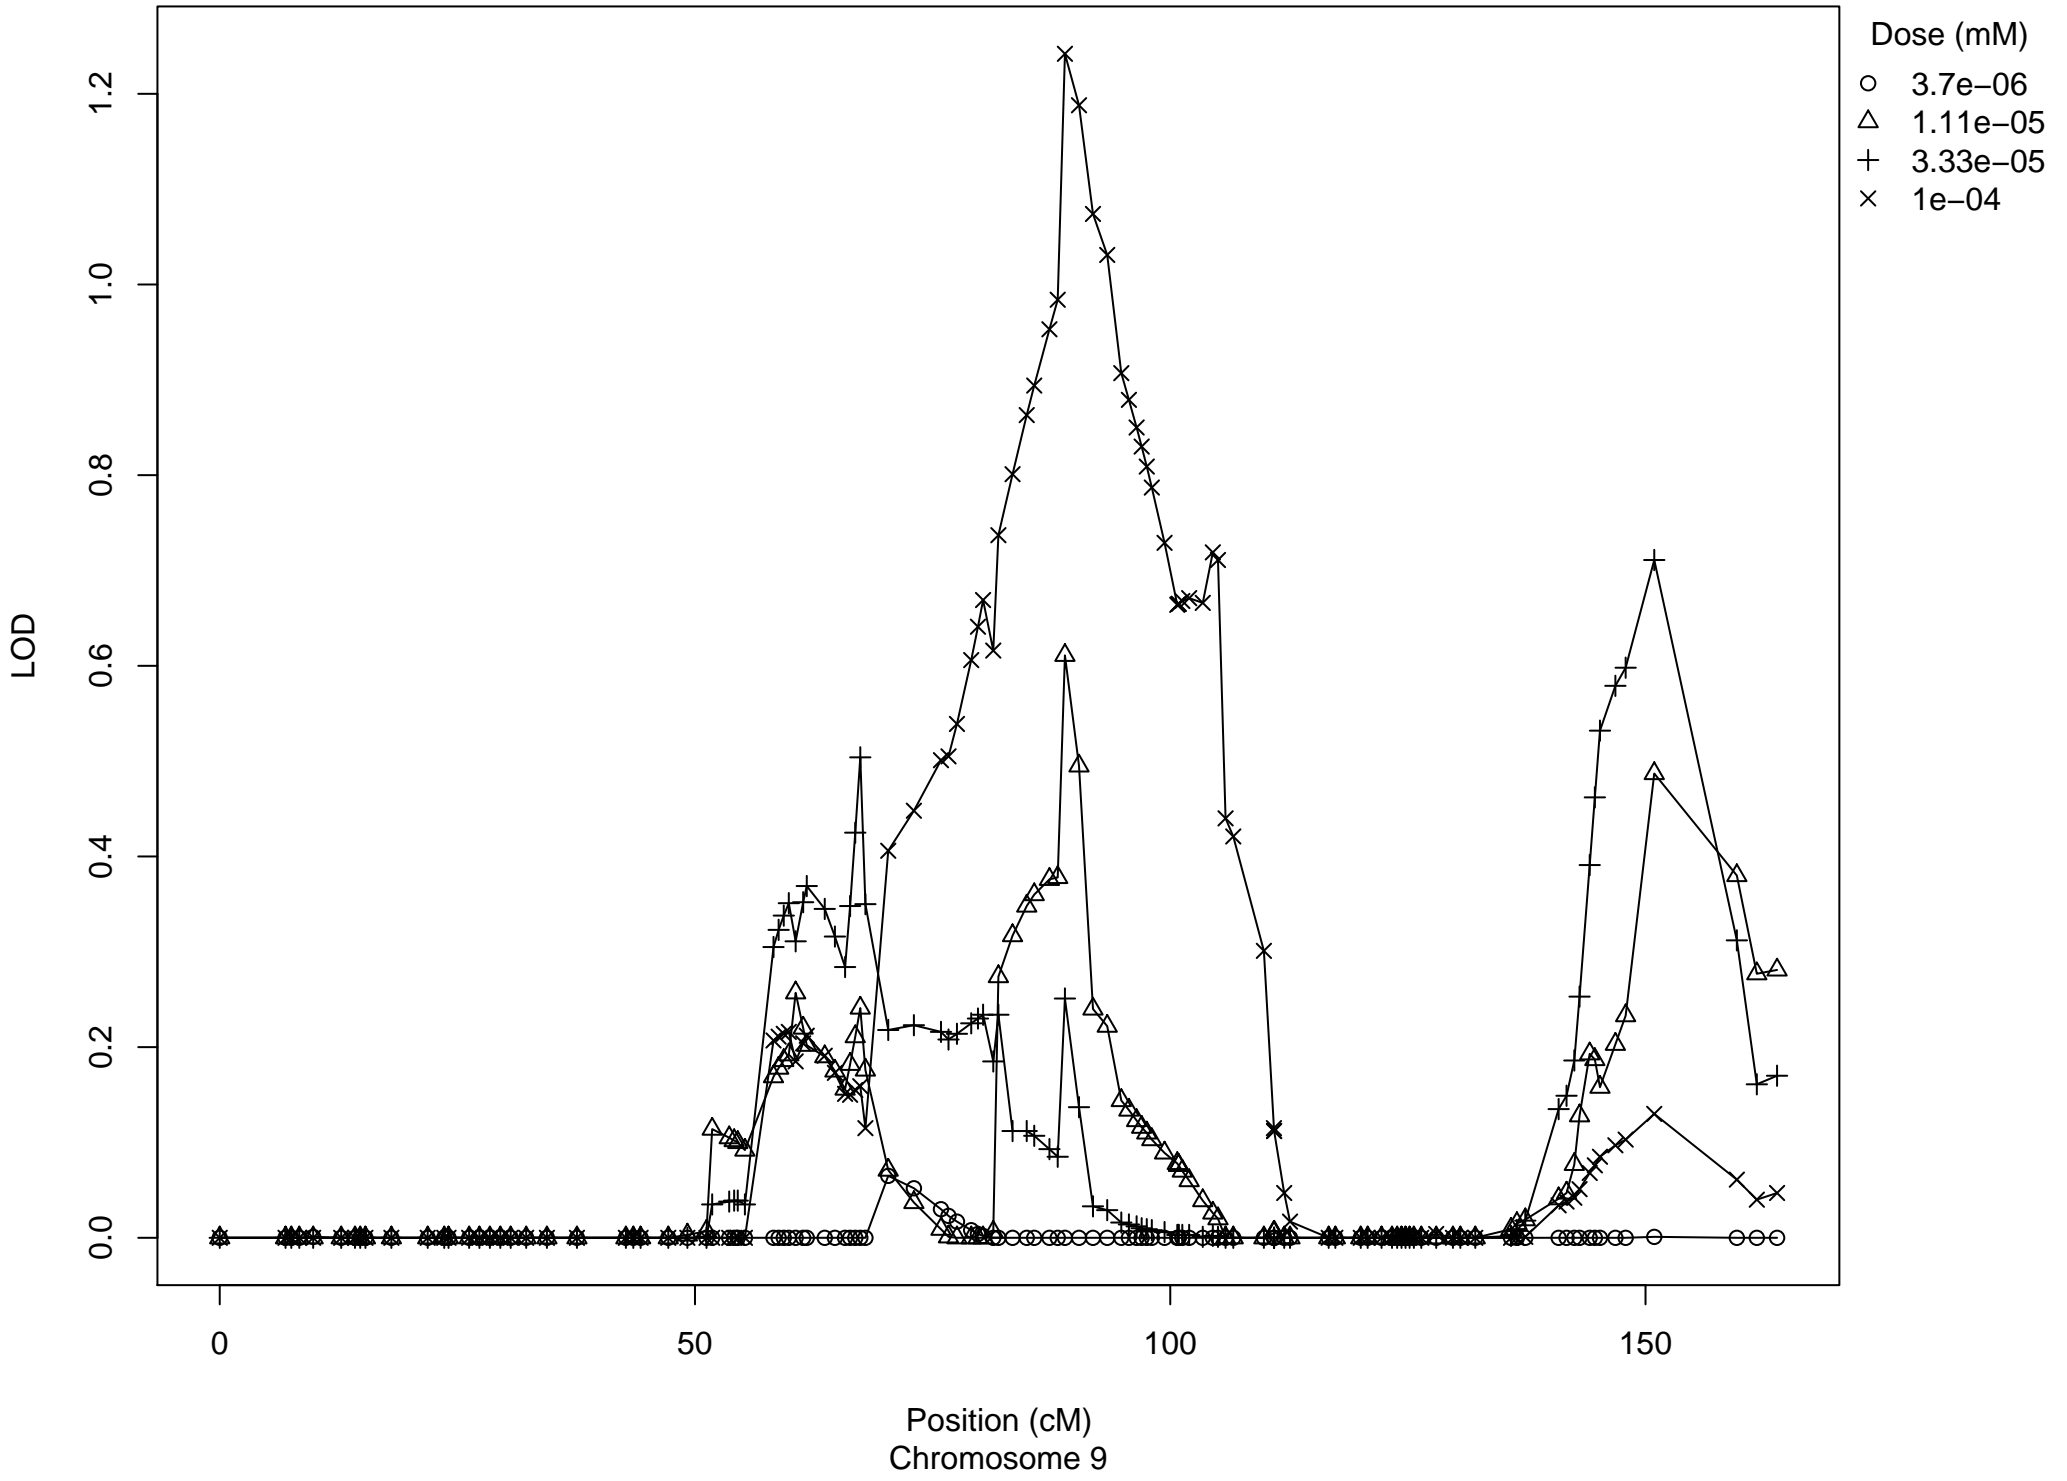

# Mitoxantrone dihydrochloride (Mitox)

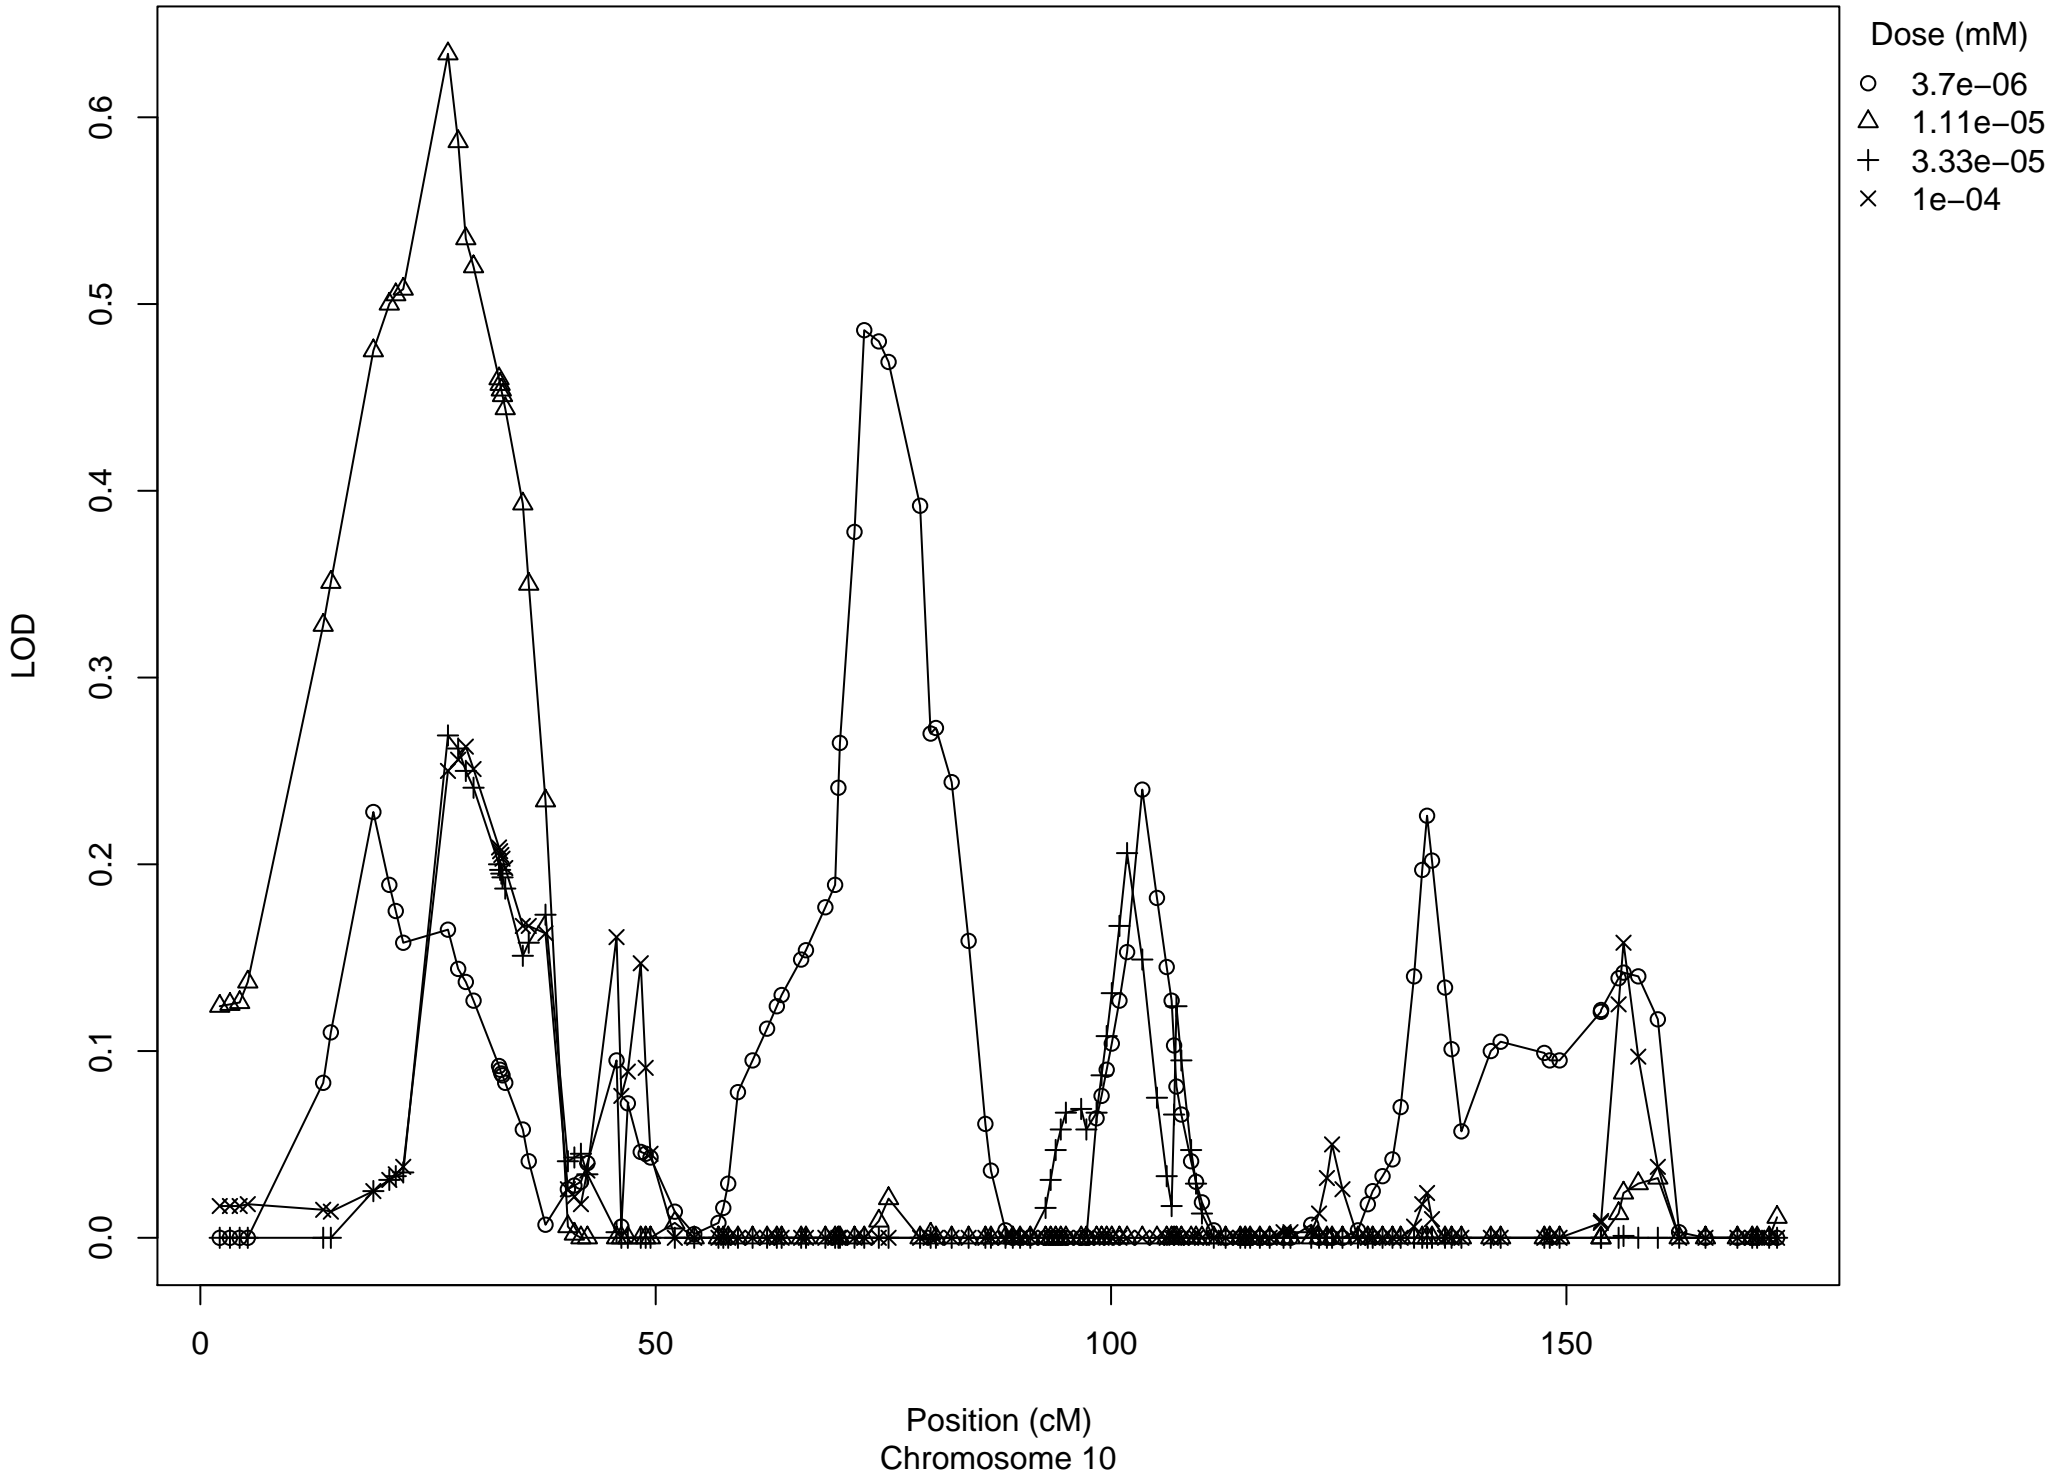

# Mitoxantrone dihydrochloride (Mitox)

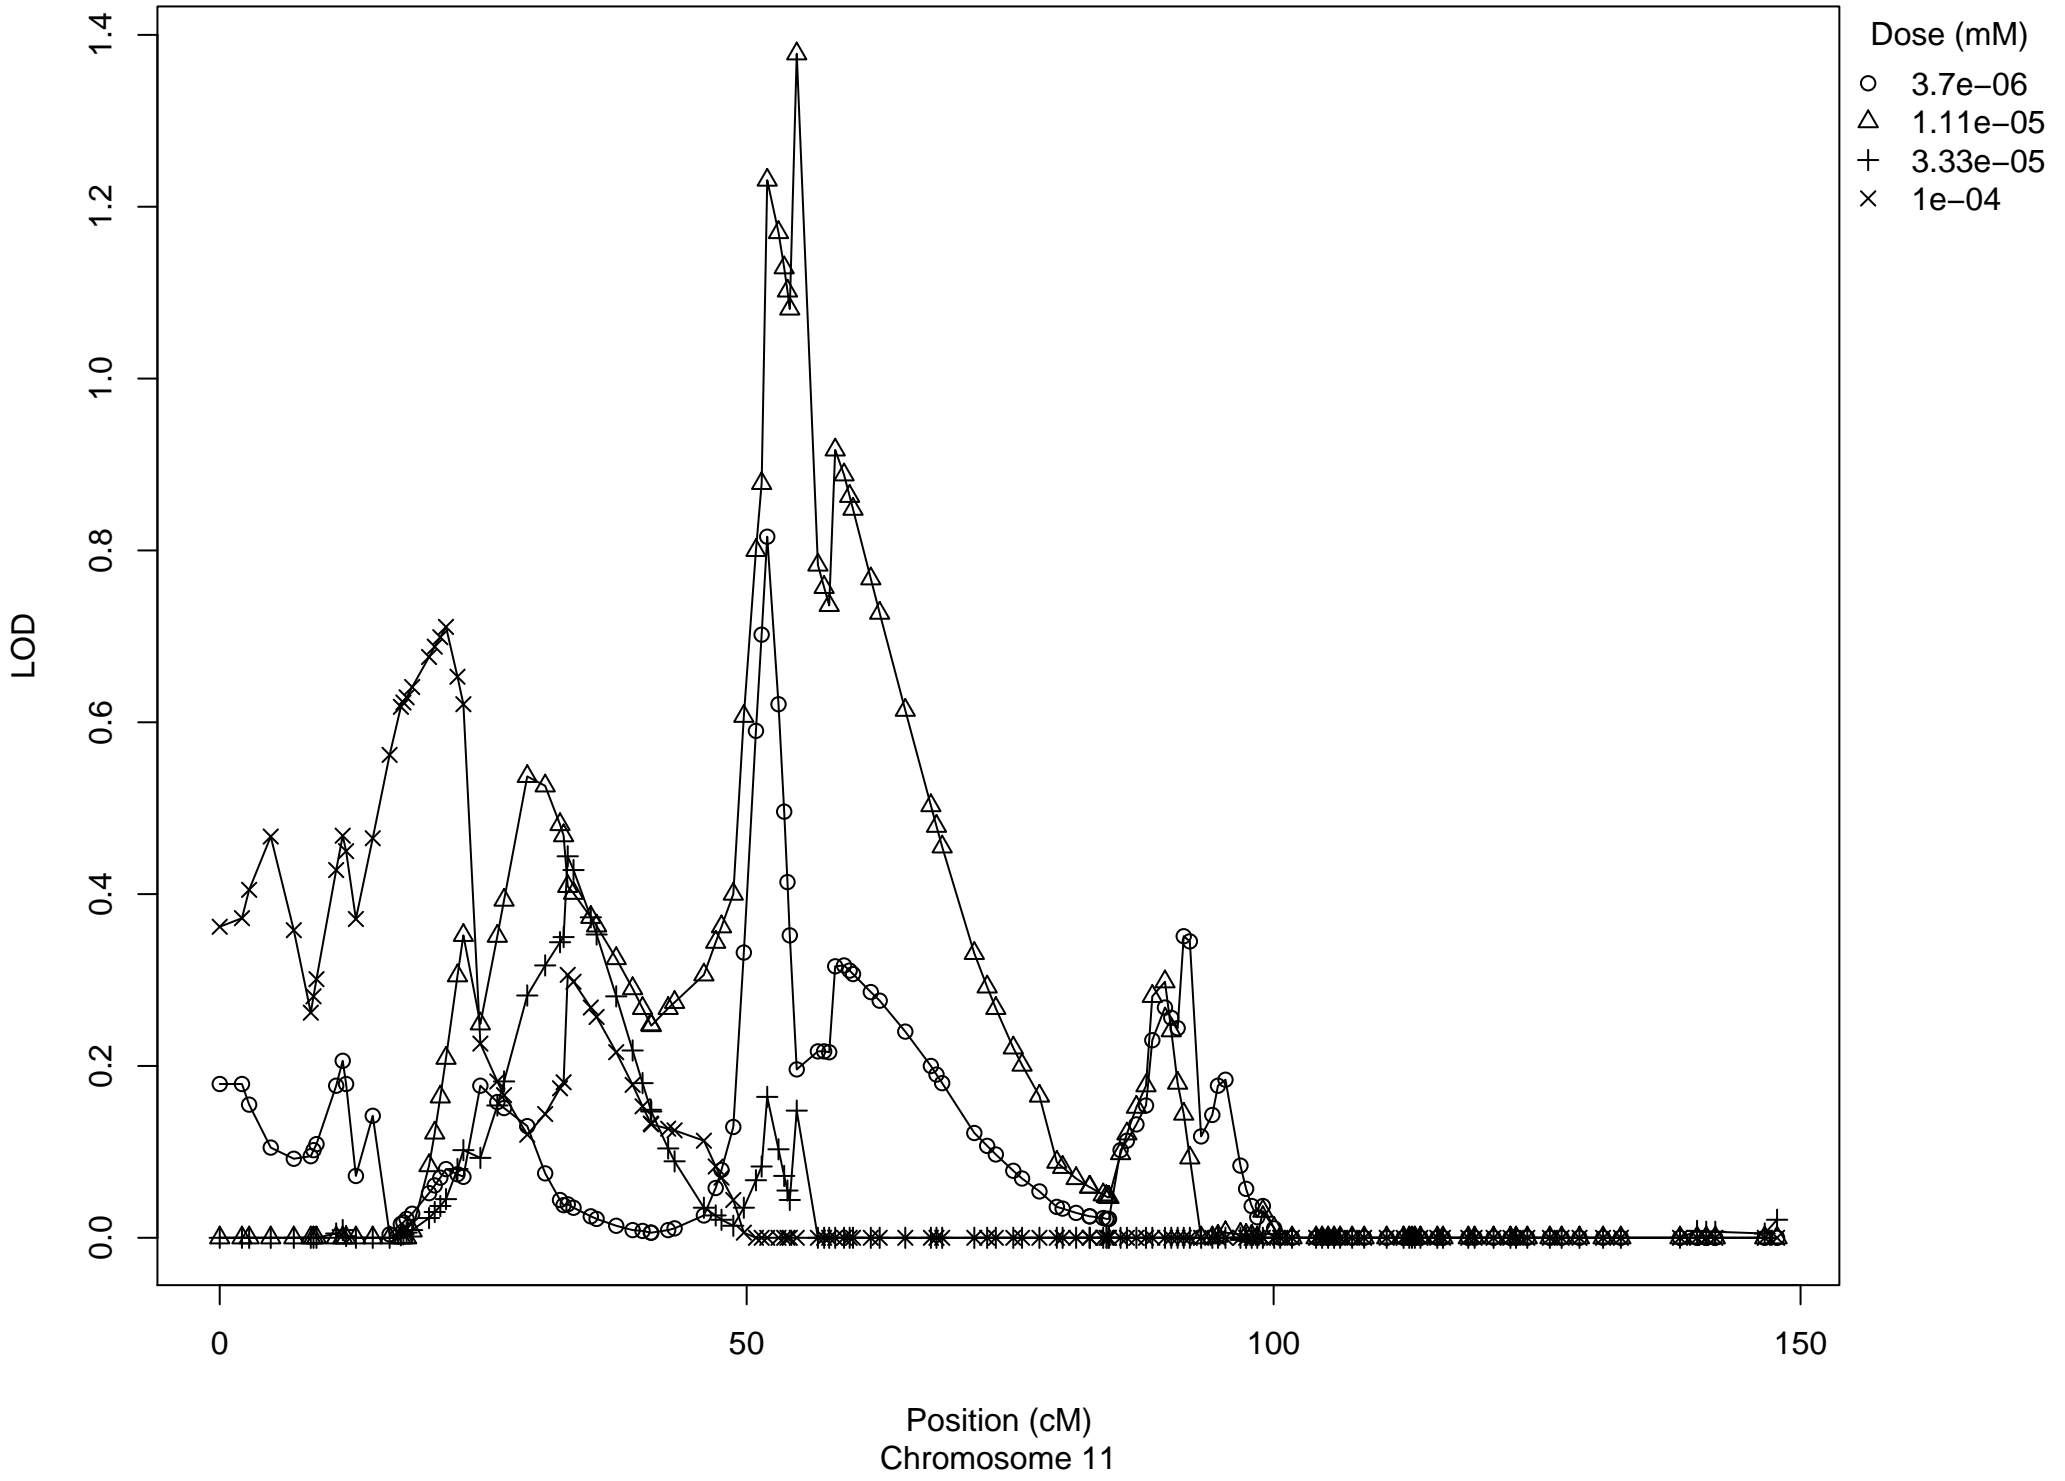

# Mitoxantrone dihydrochloride (Mitox)

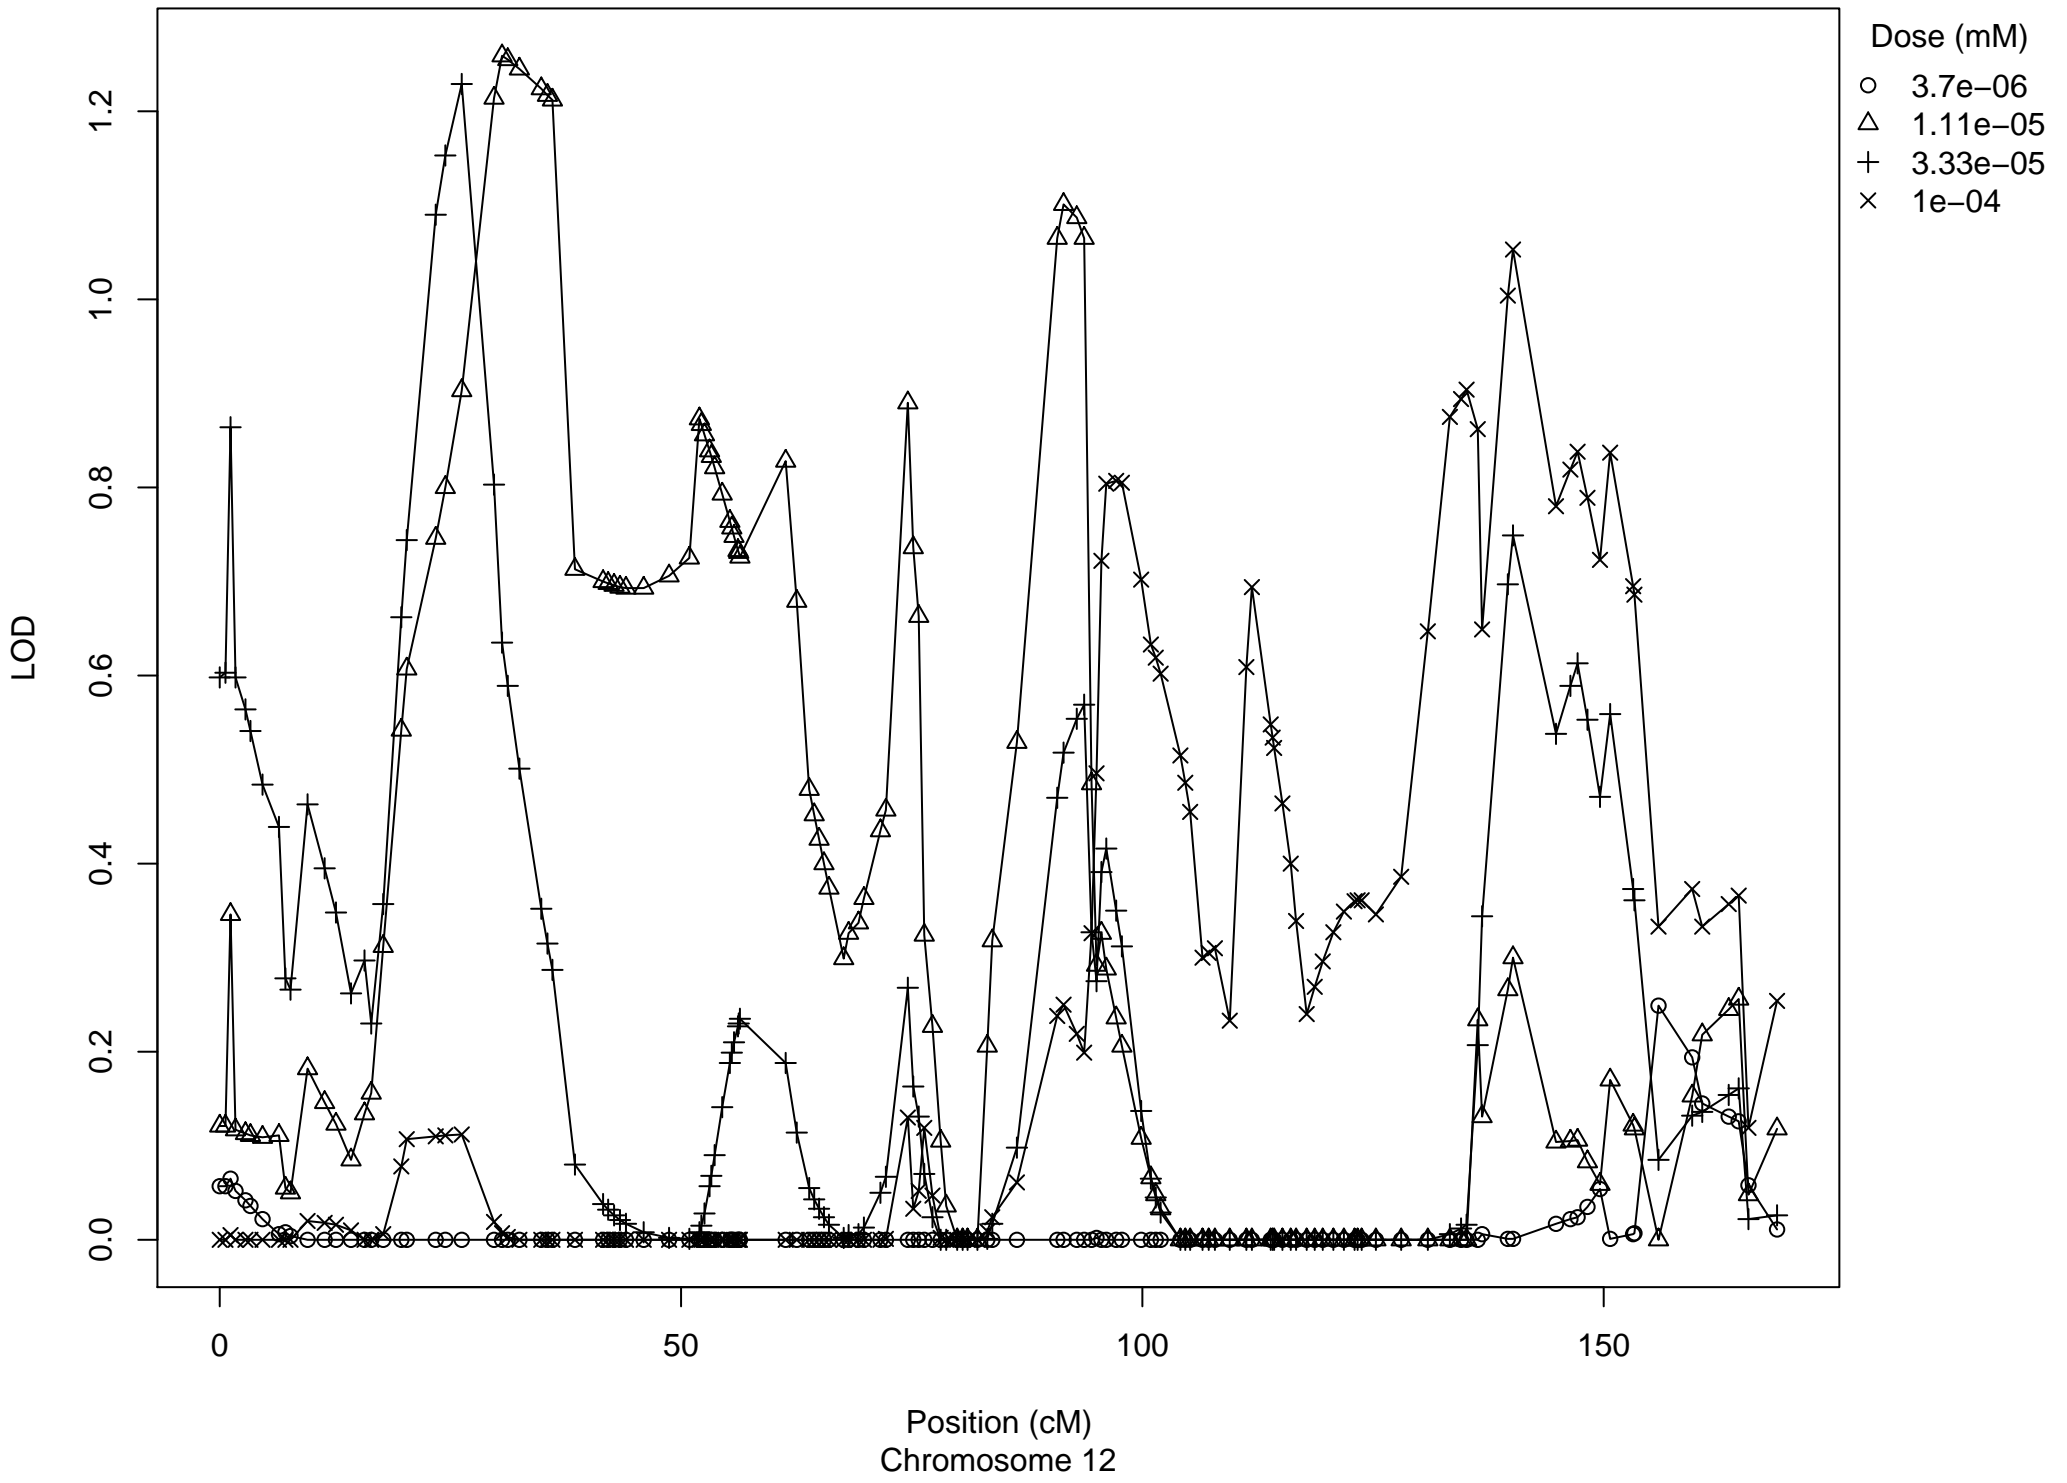

# Mitoxantrone dihydrochloride (Mitox)

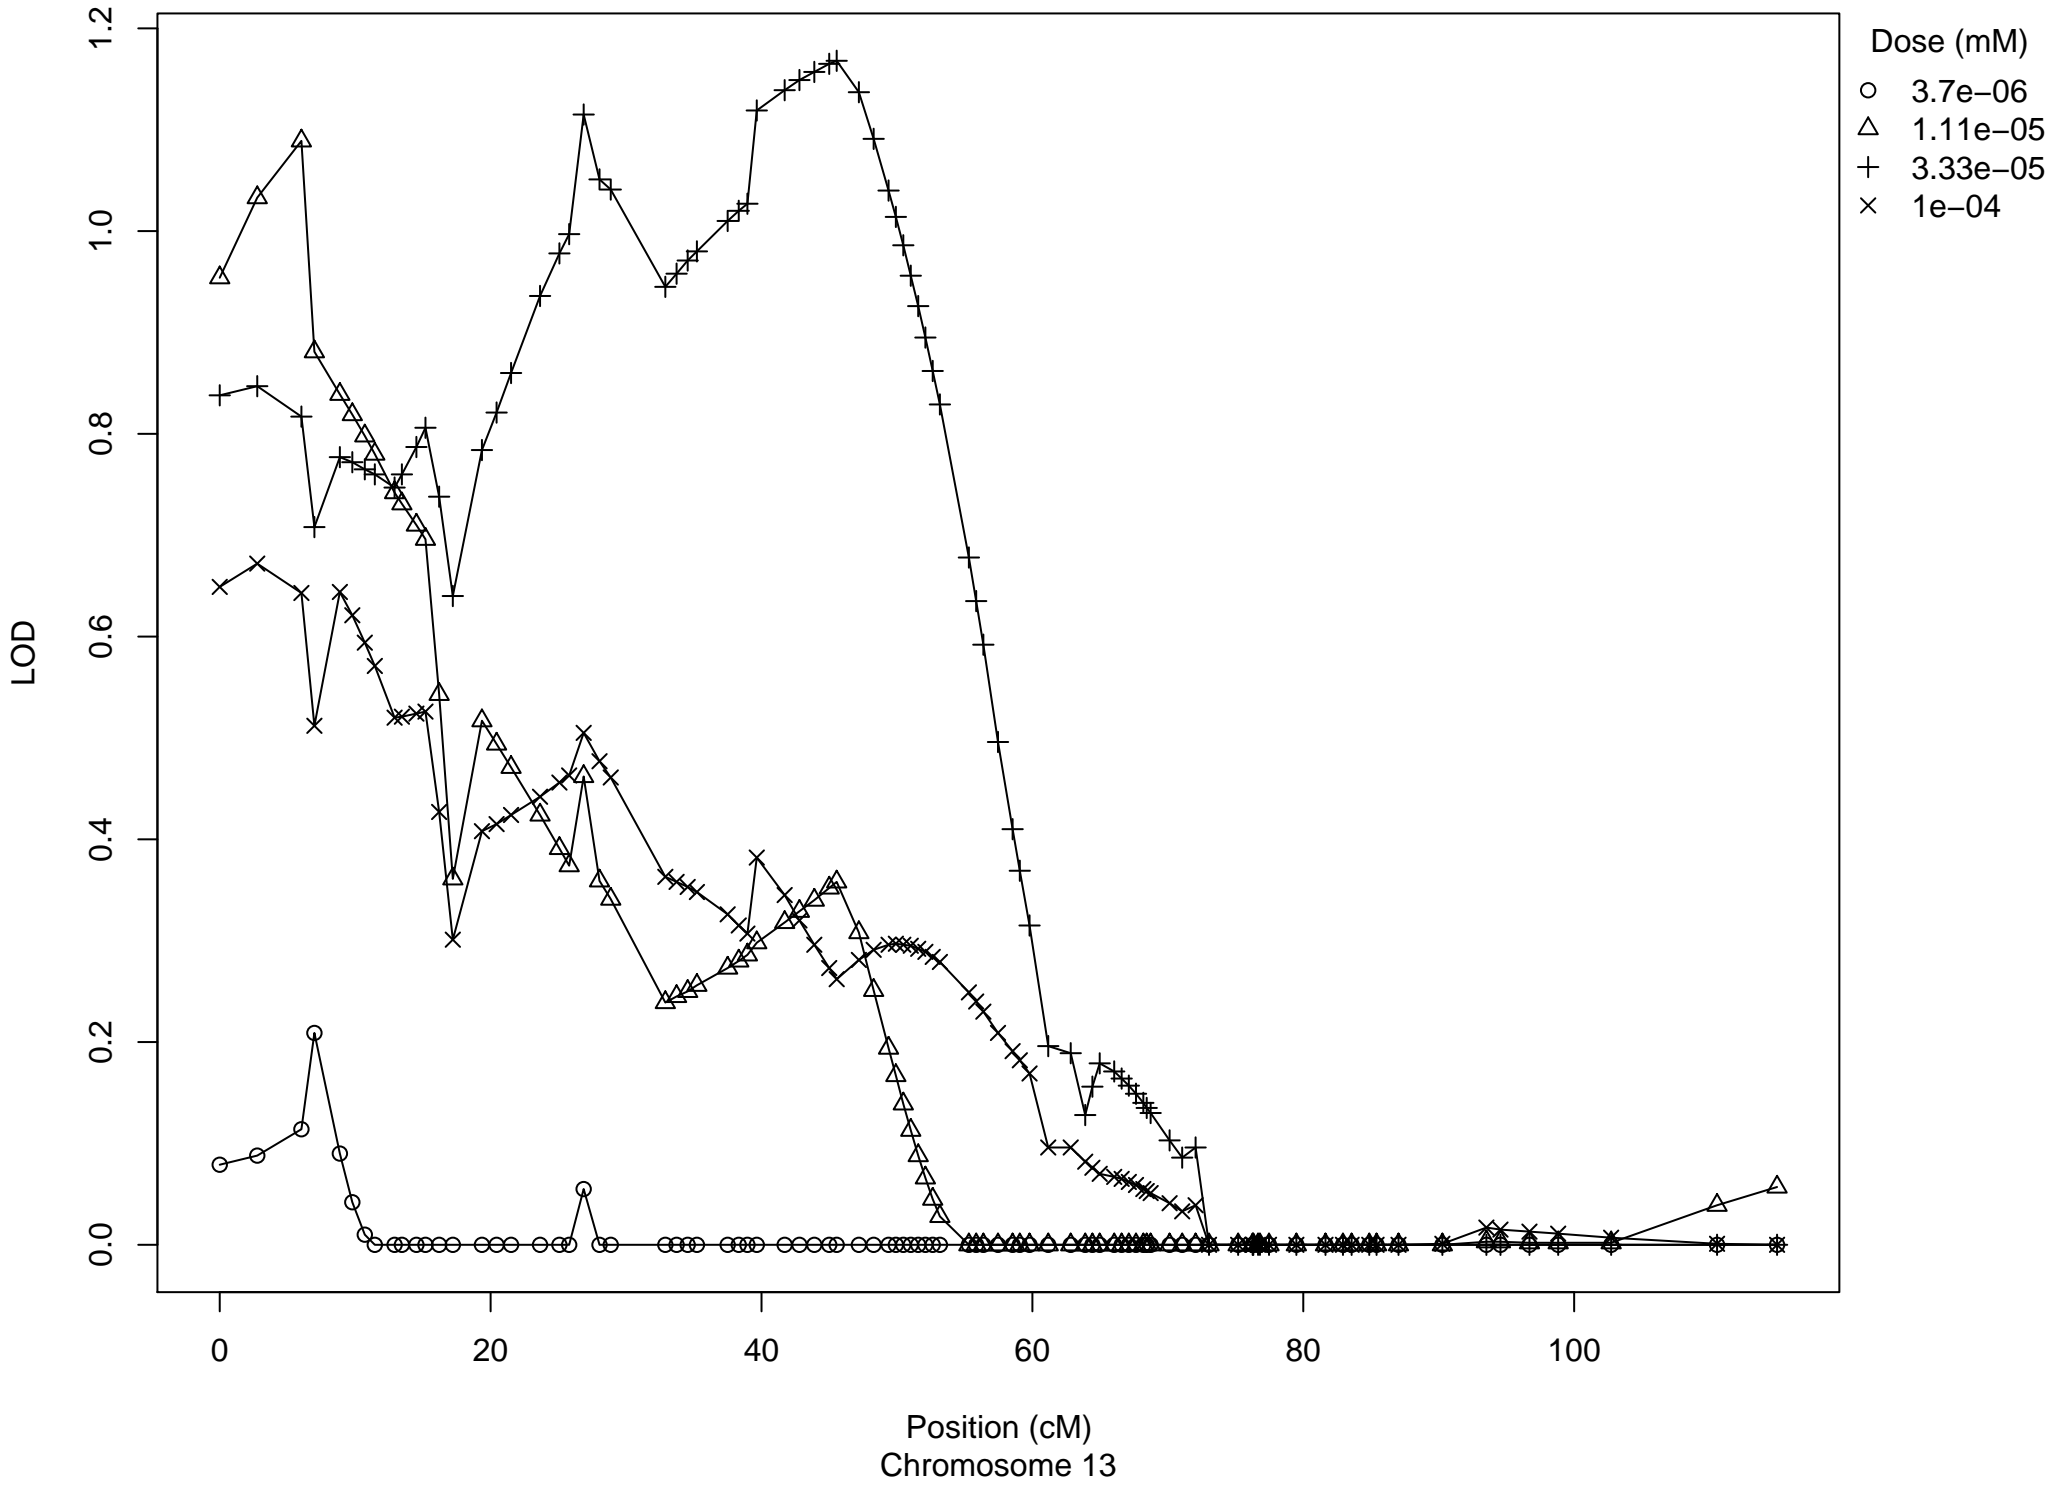

# Mitoxantrone dihydrochloride (Mitox)

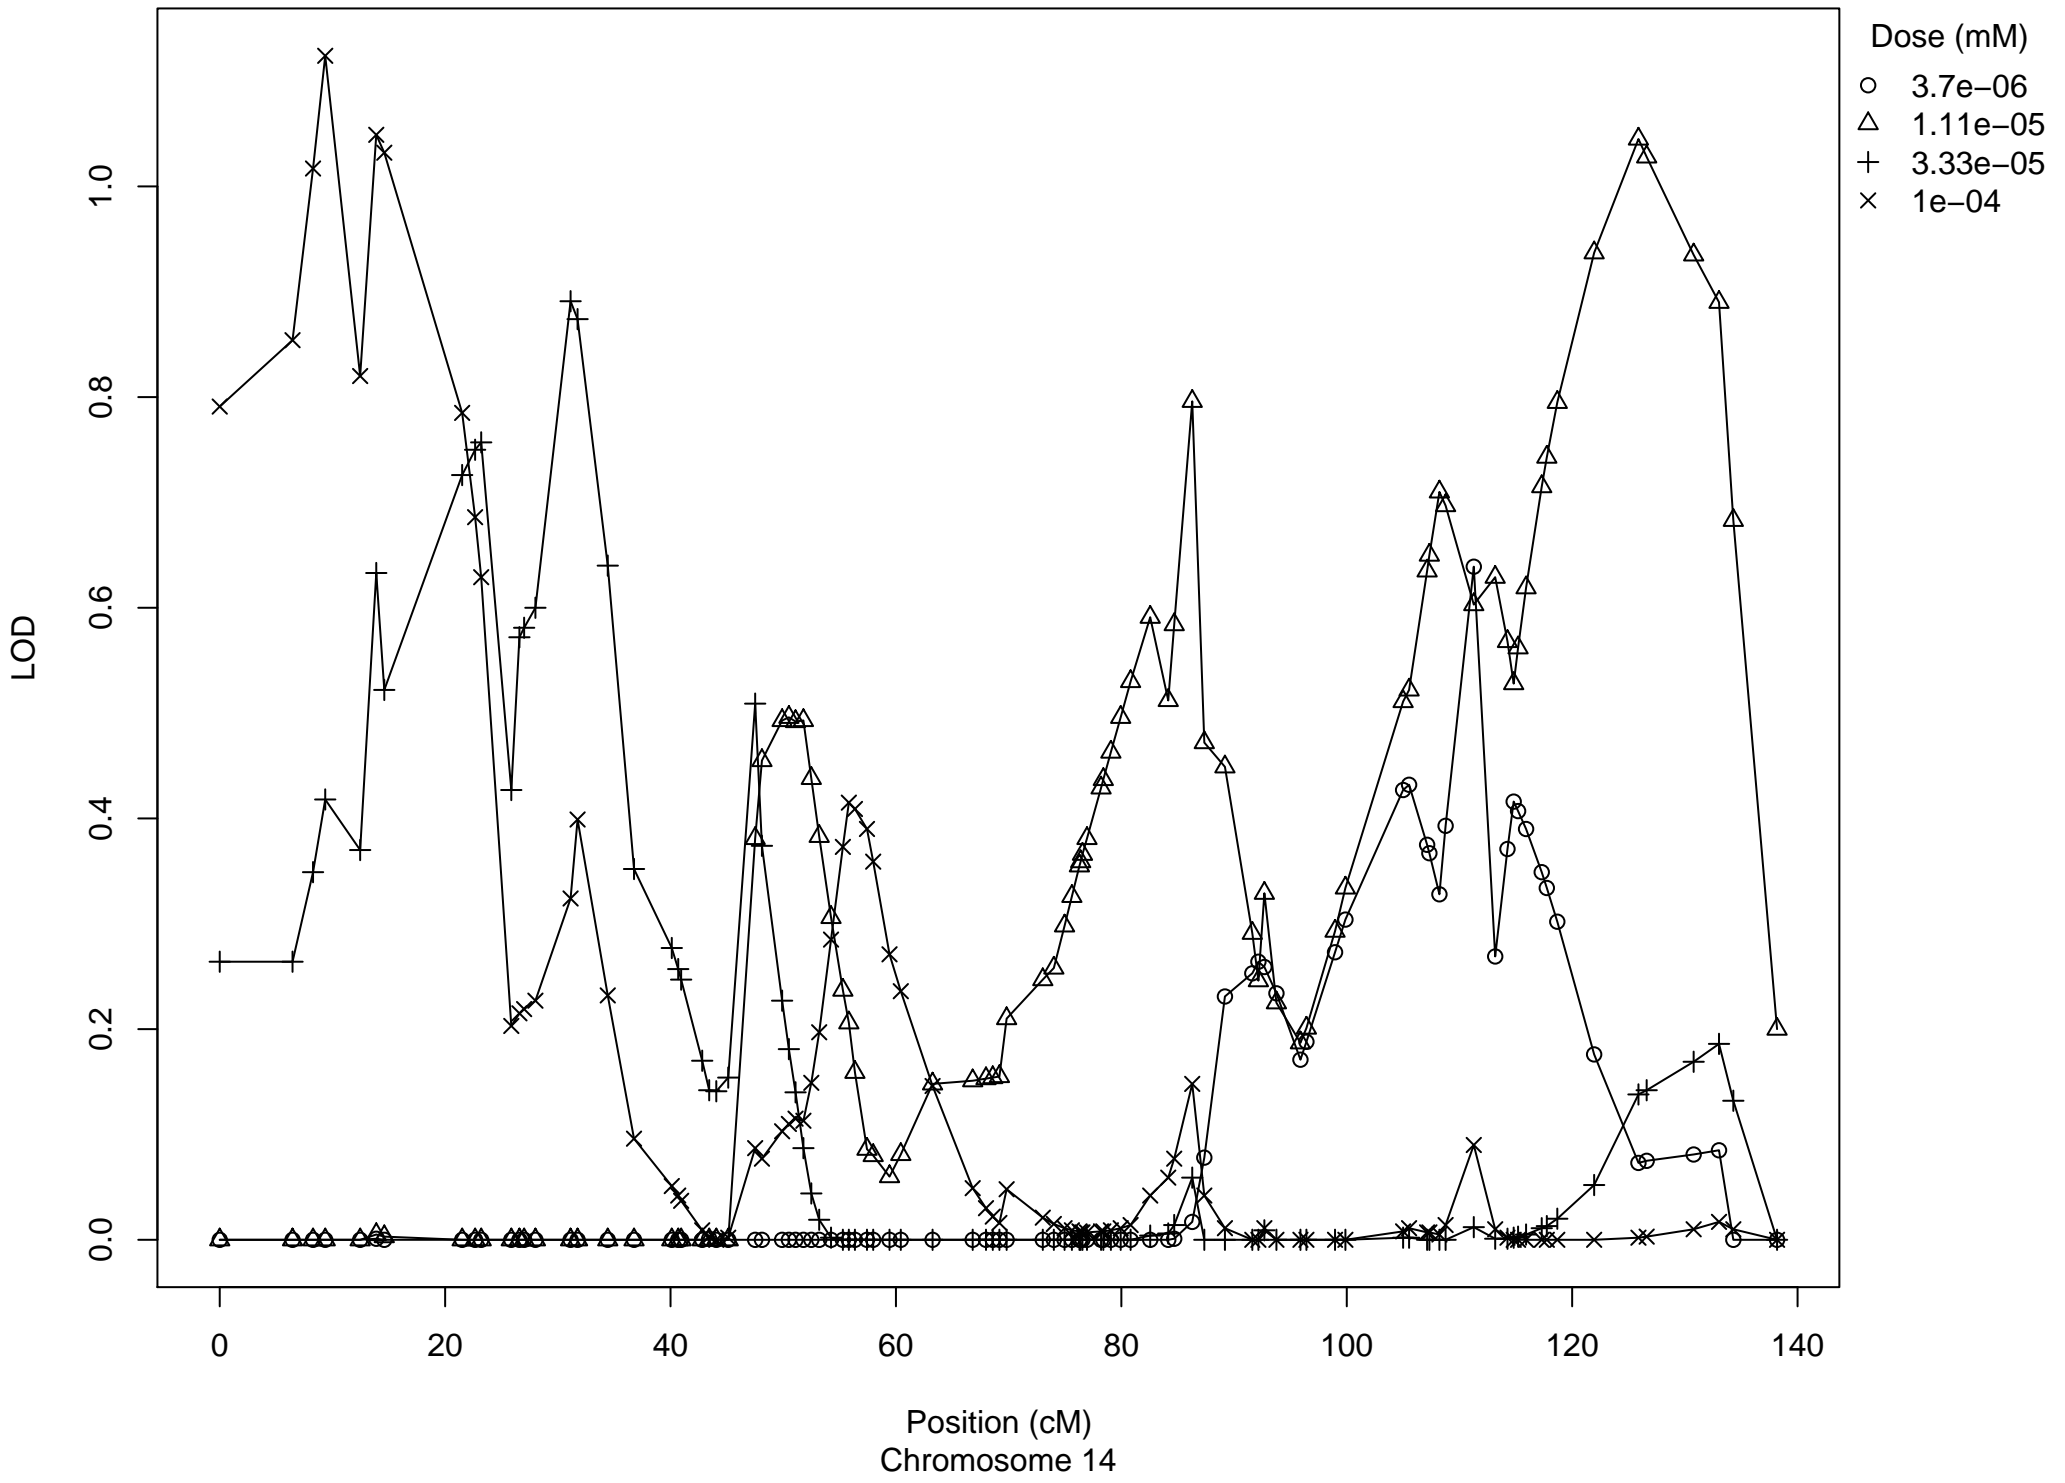



# Mitoxantrone dihydrochloride (Mitox)

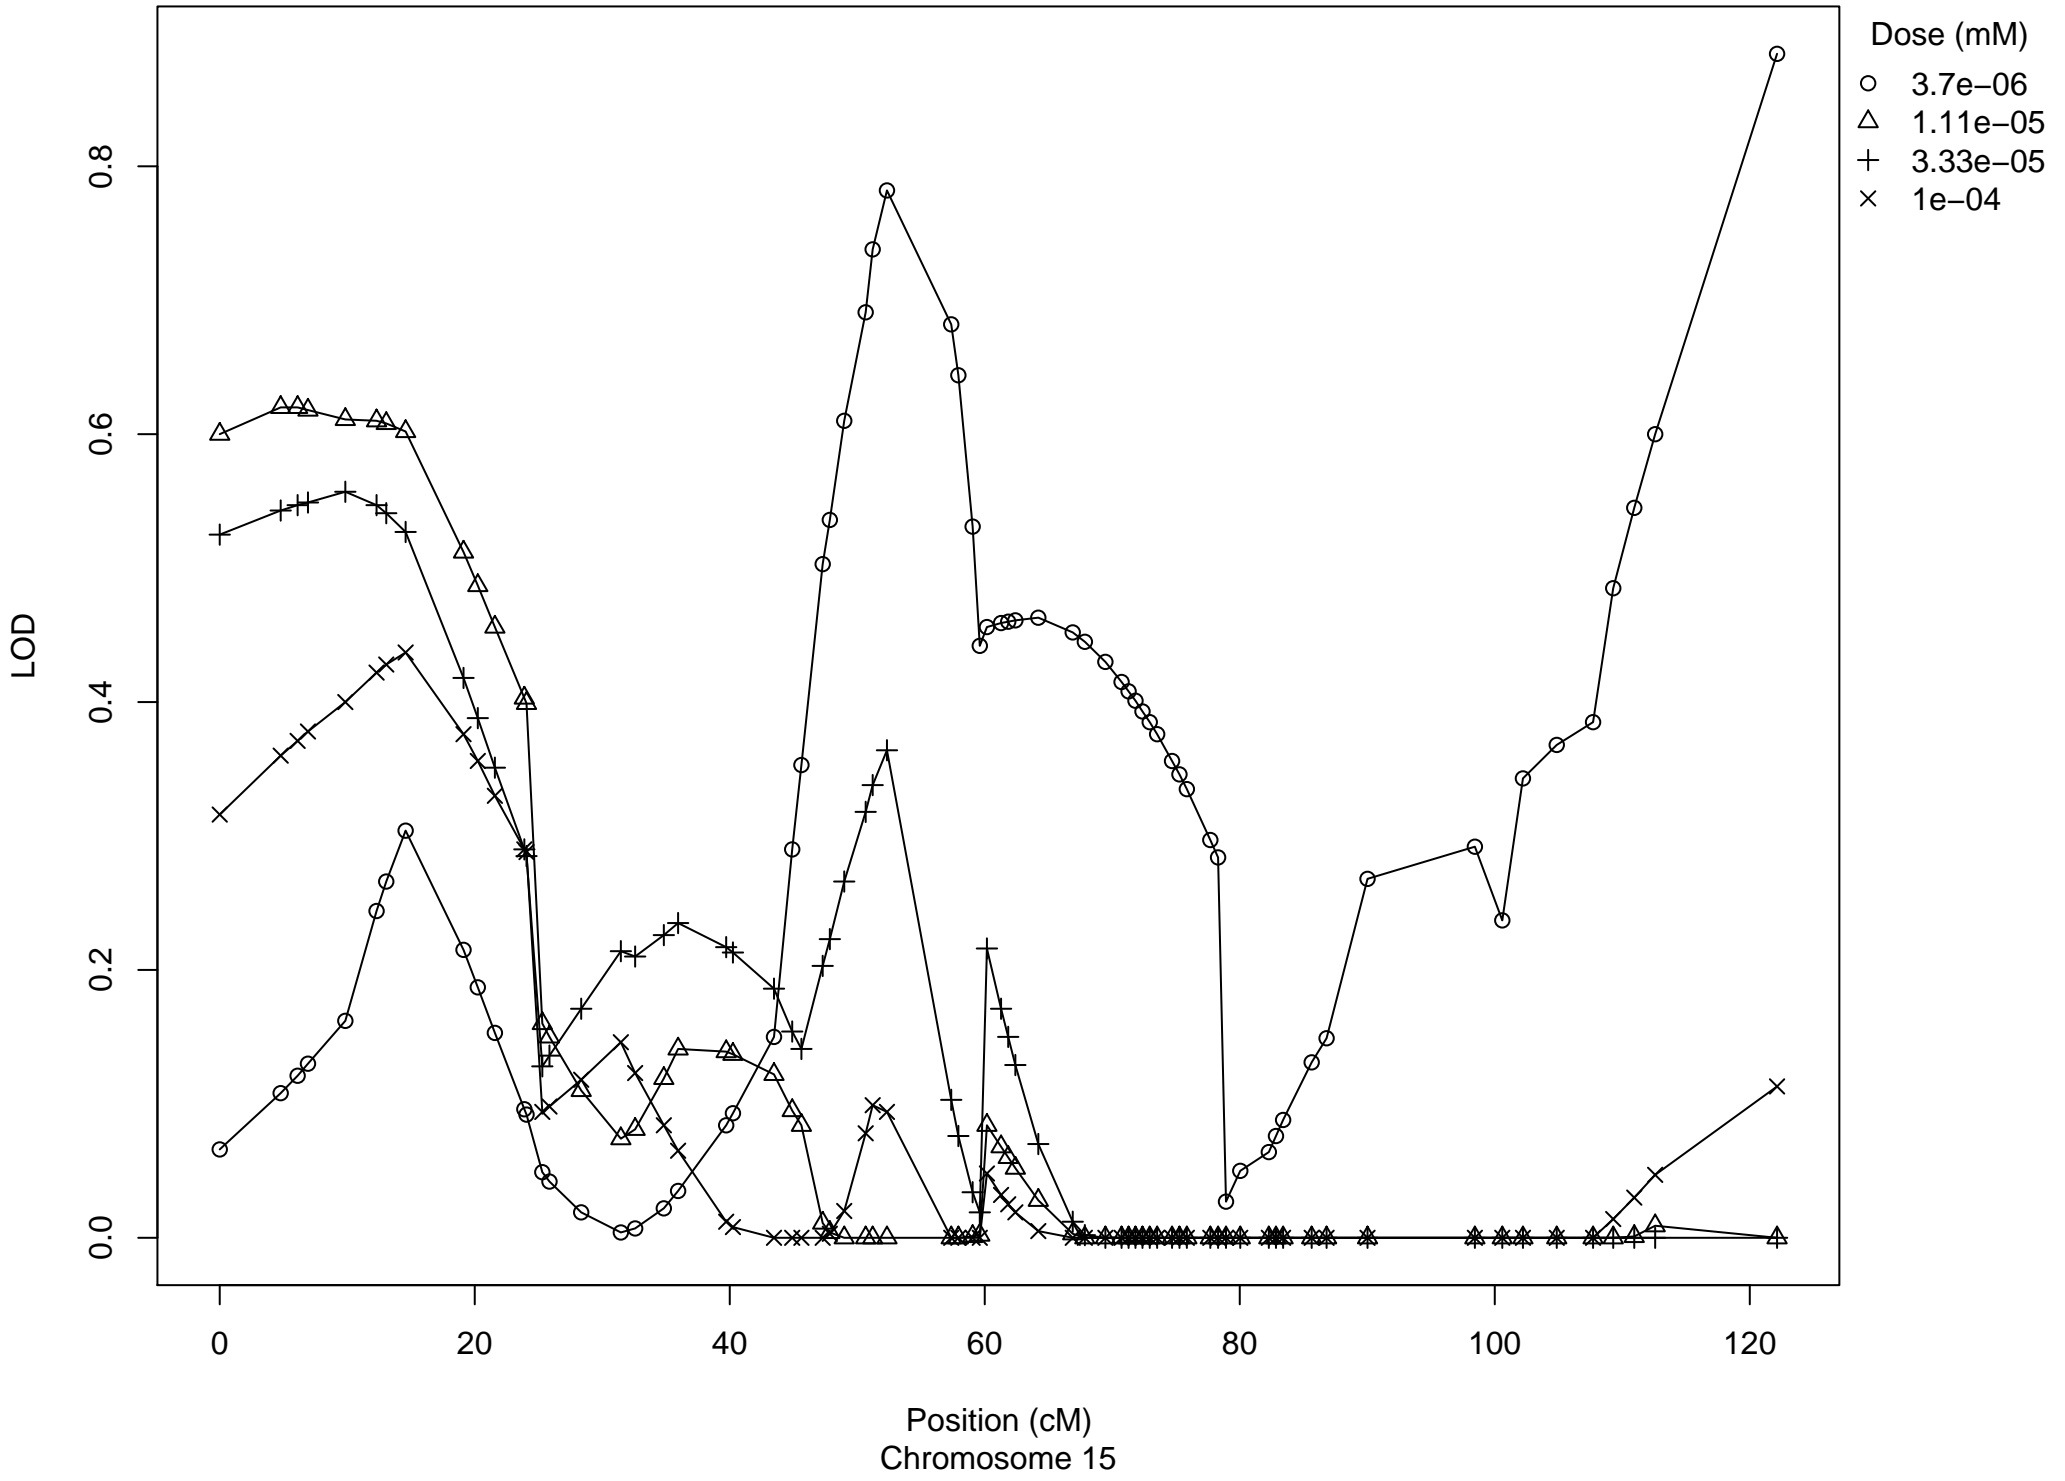

# Mitoxantrone dihydrochloride (Mitox)

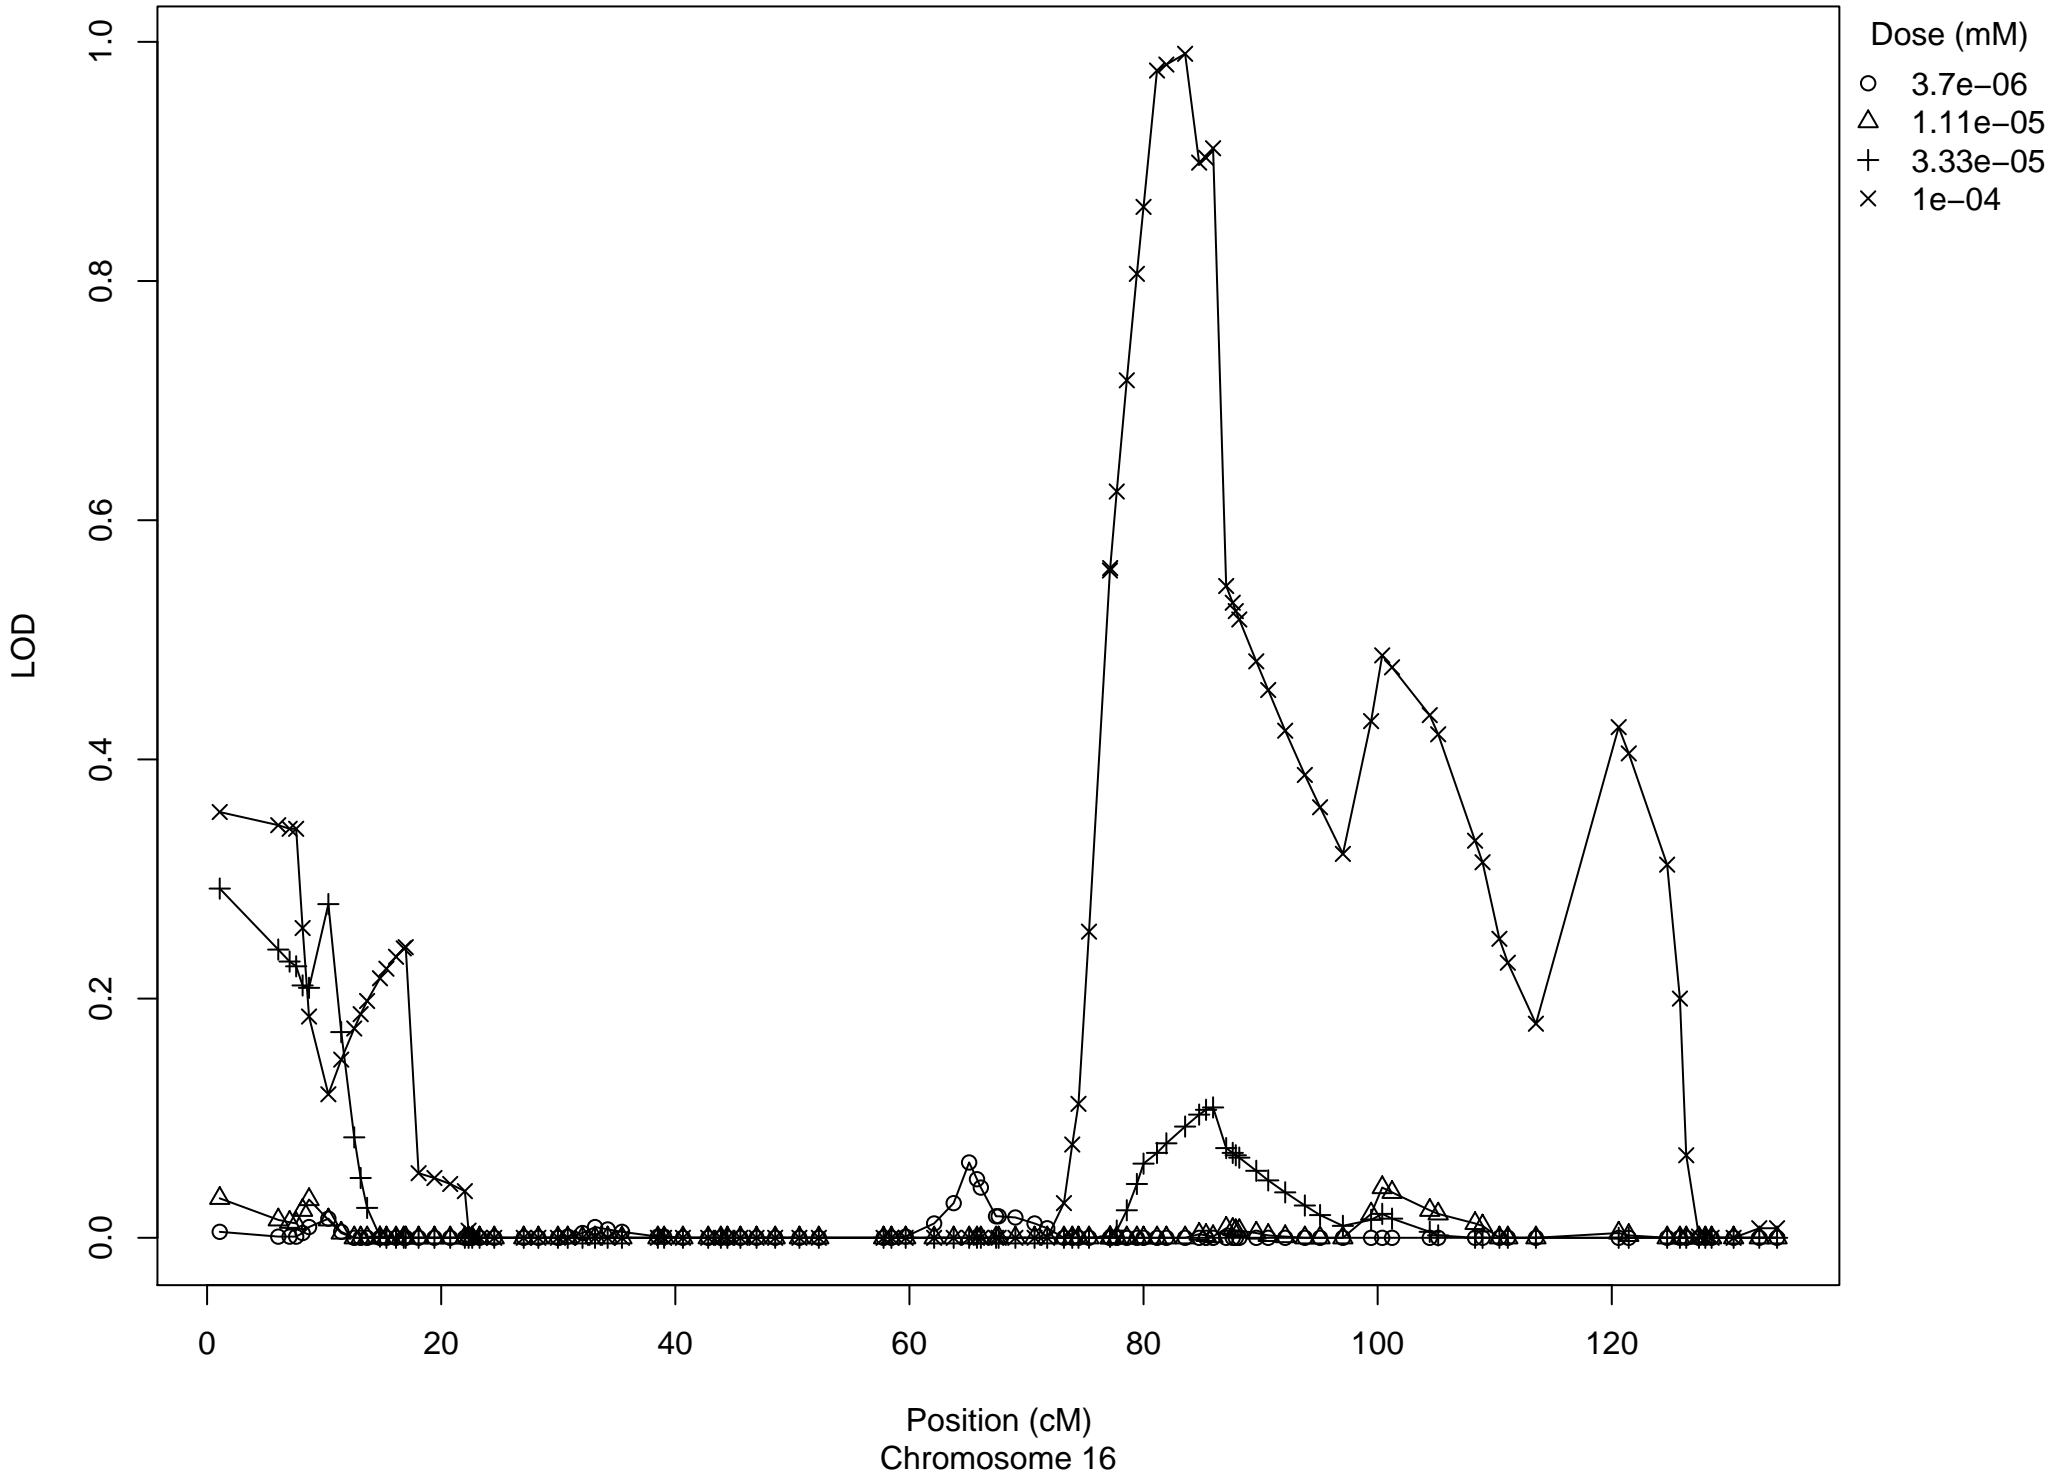

# Mitoxantrone dihydrochloride (Mitox)

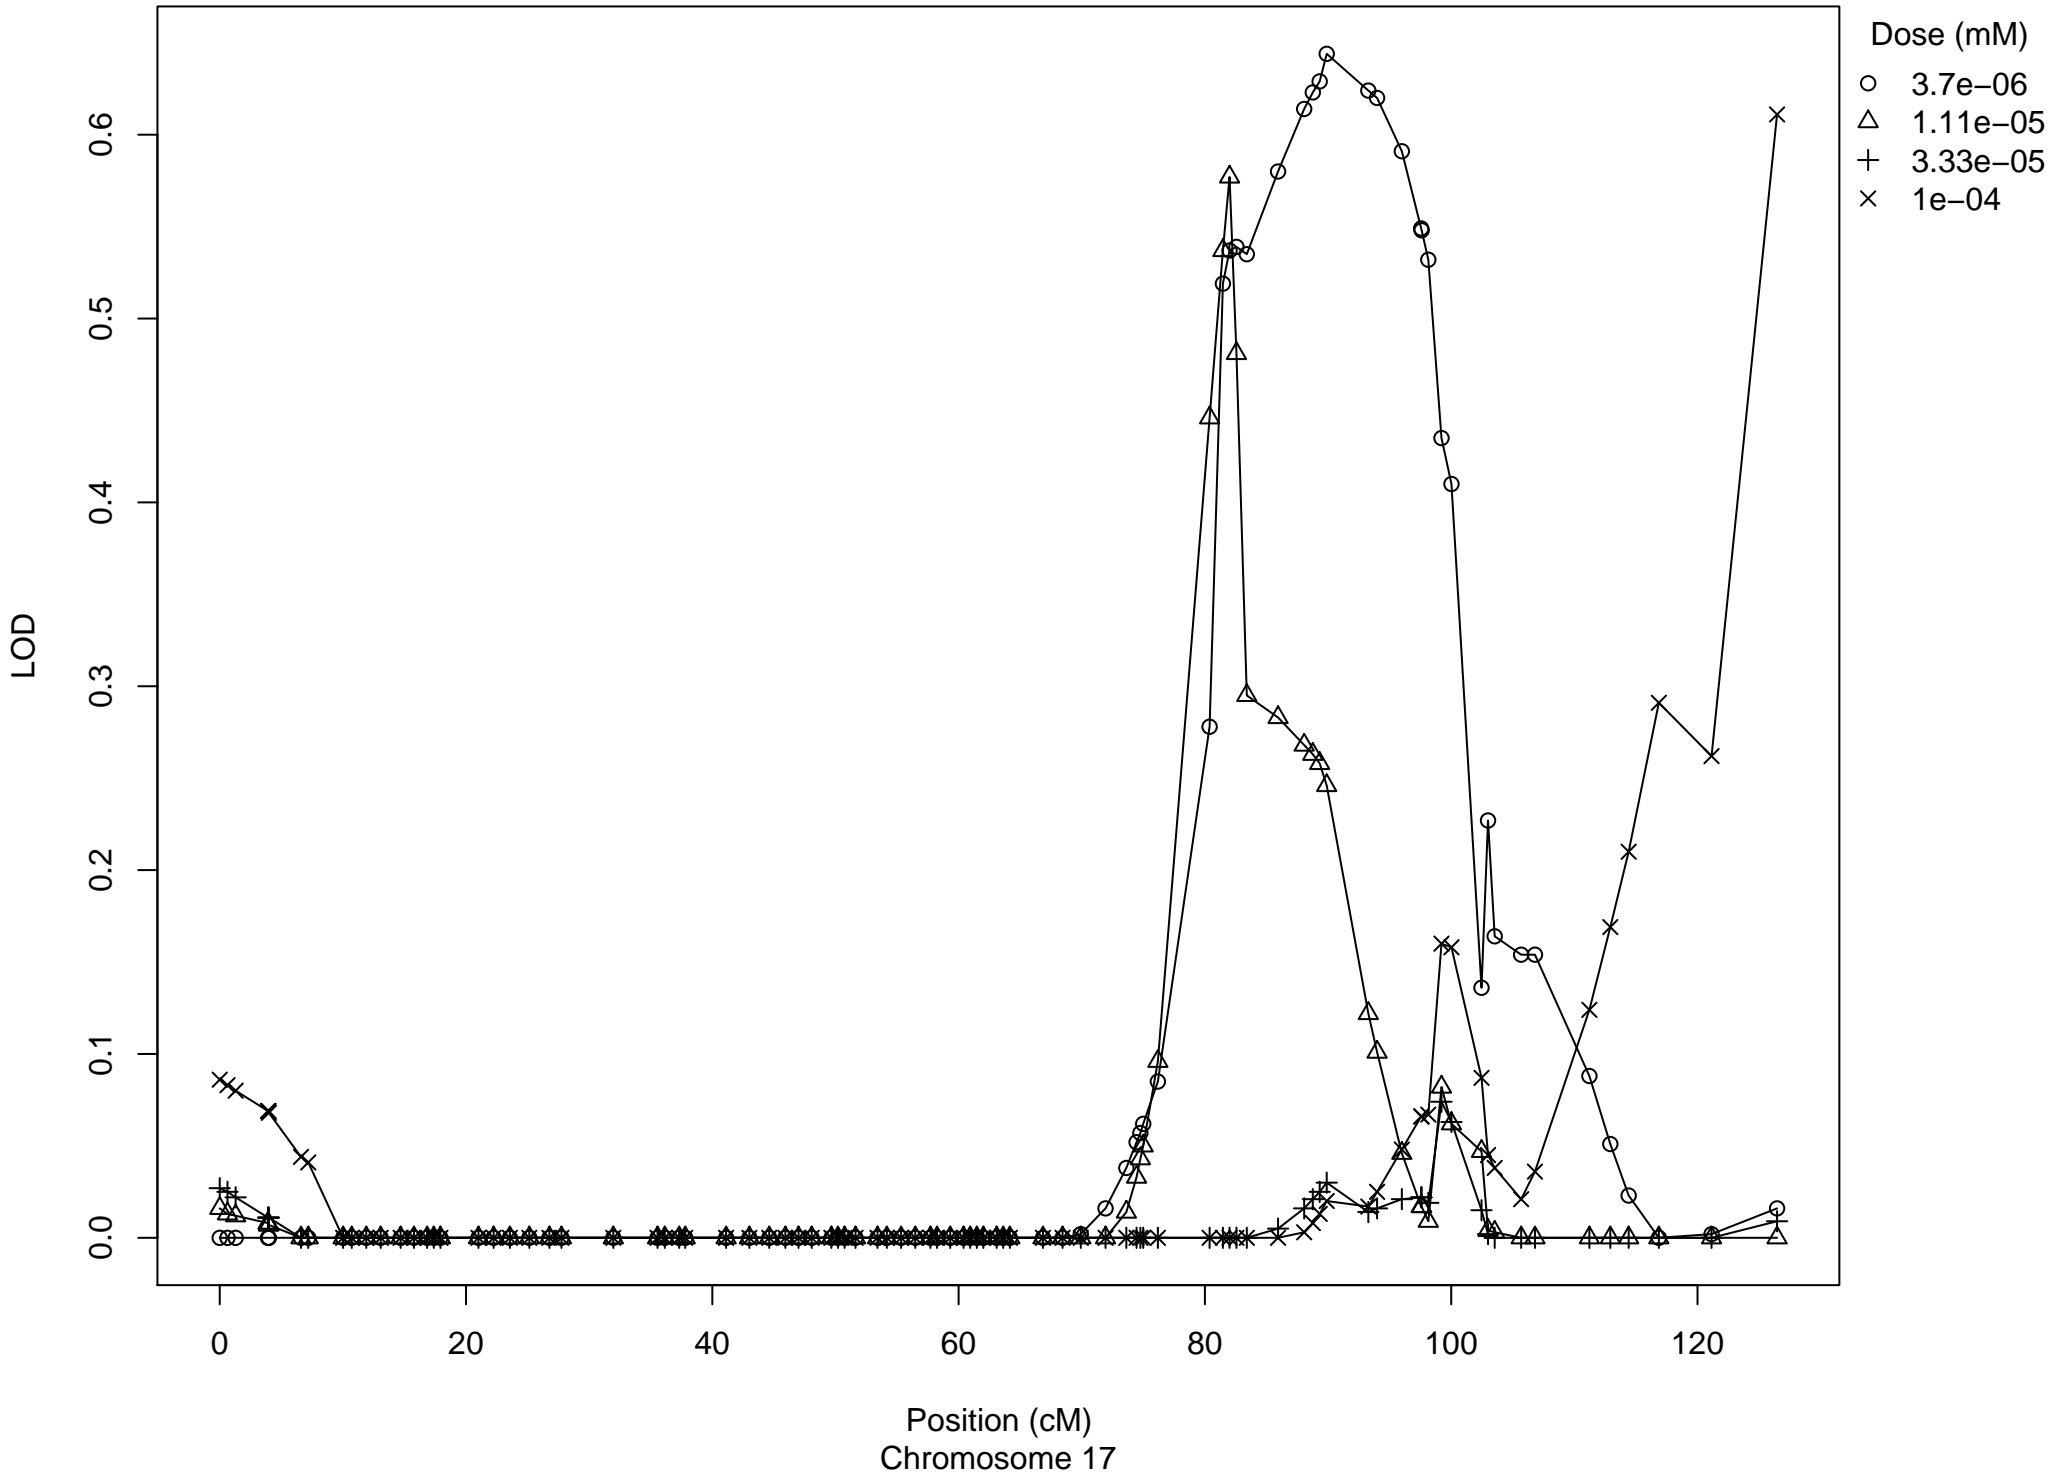

# Mitoxantrone dihydrochloride (Mitox)

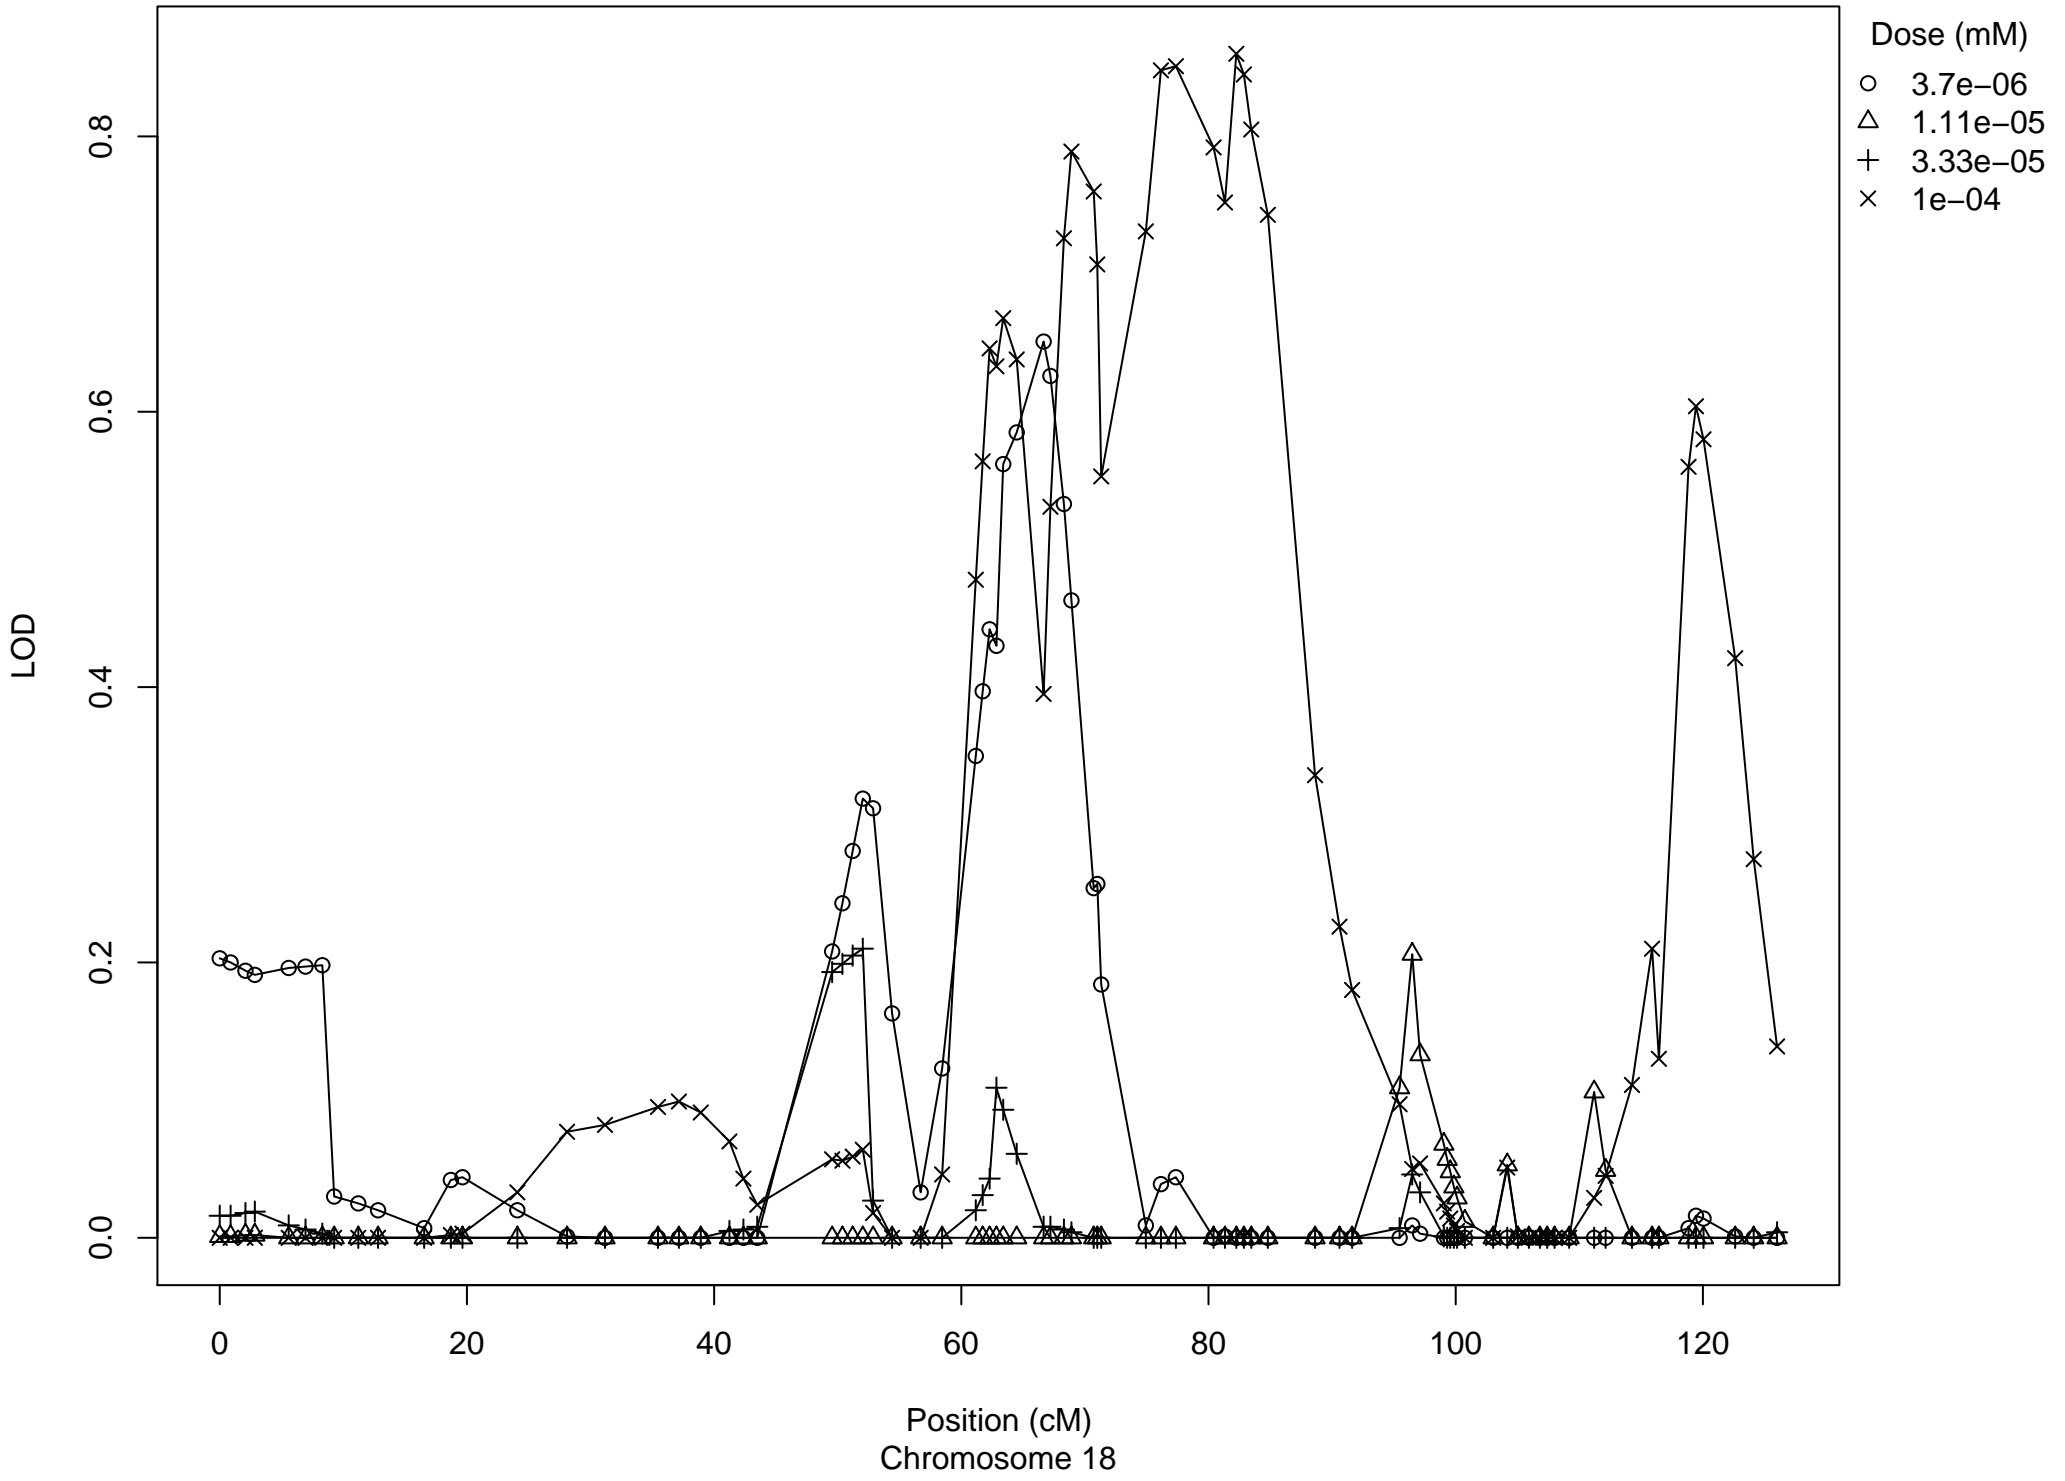

# Mitoxantrone dihydrochloride (Mitox)

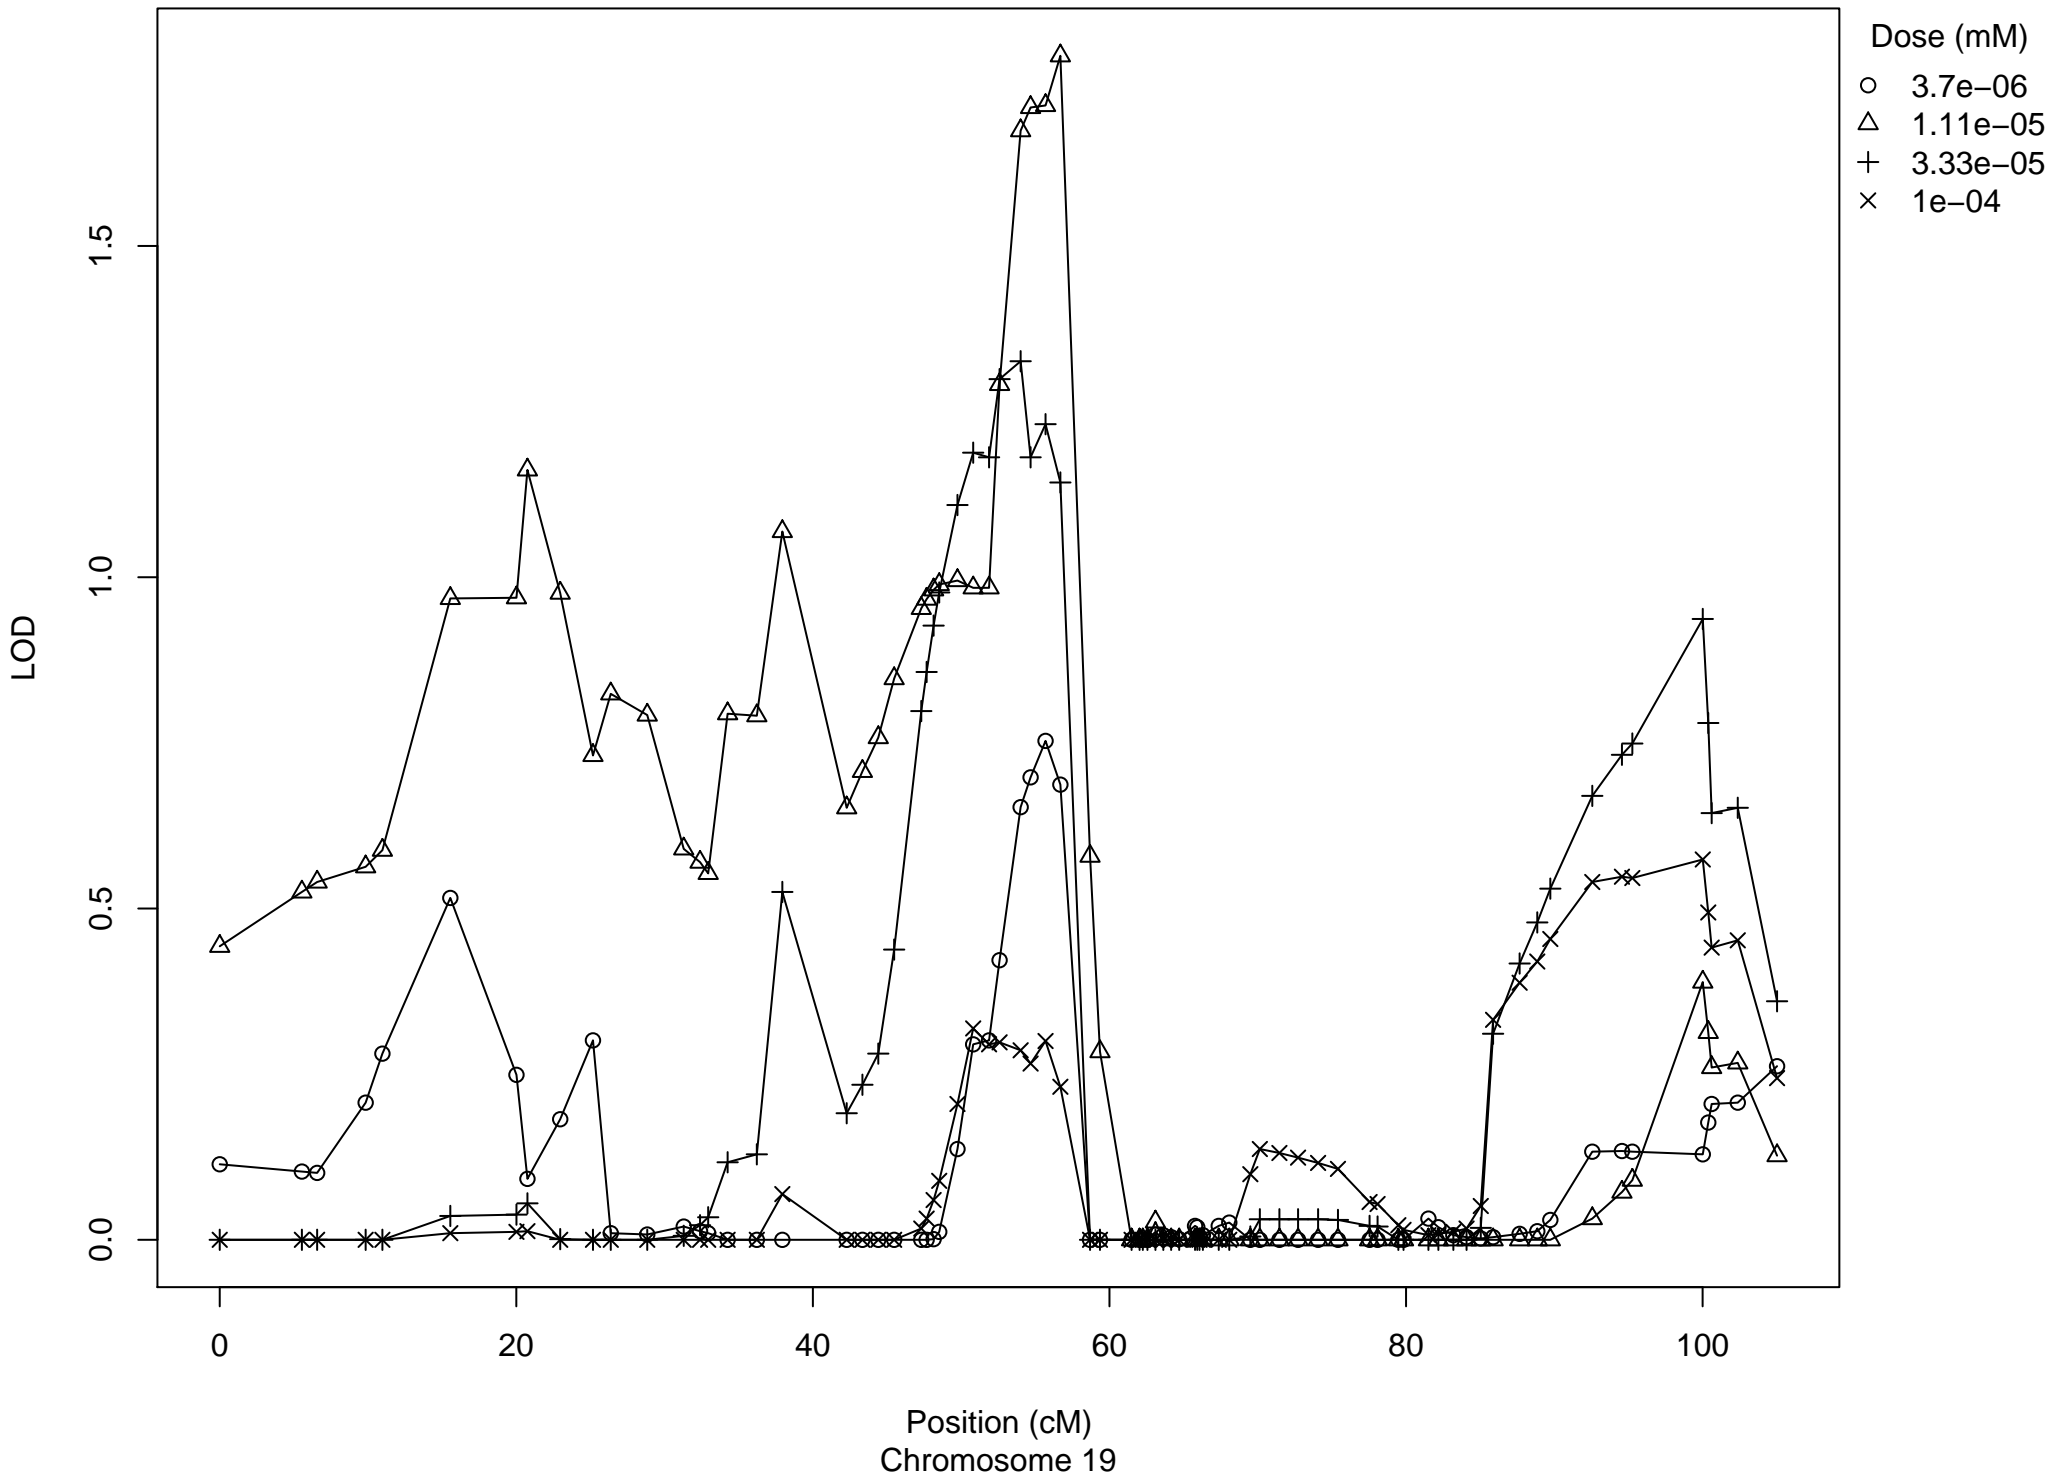

# Mitoxantrone dihydrochloride (Mitox)

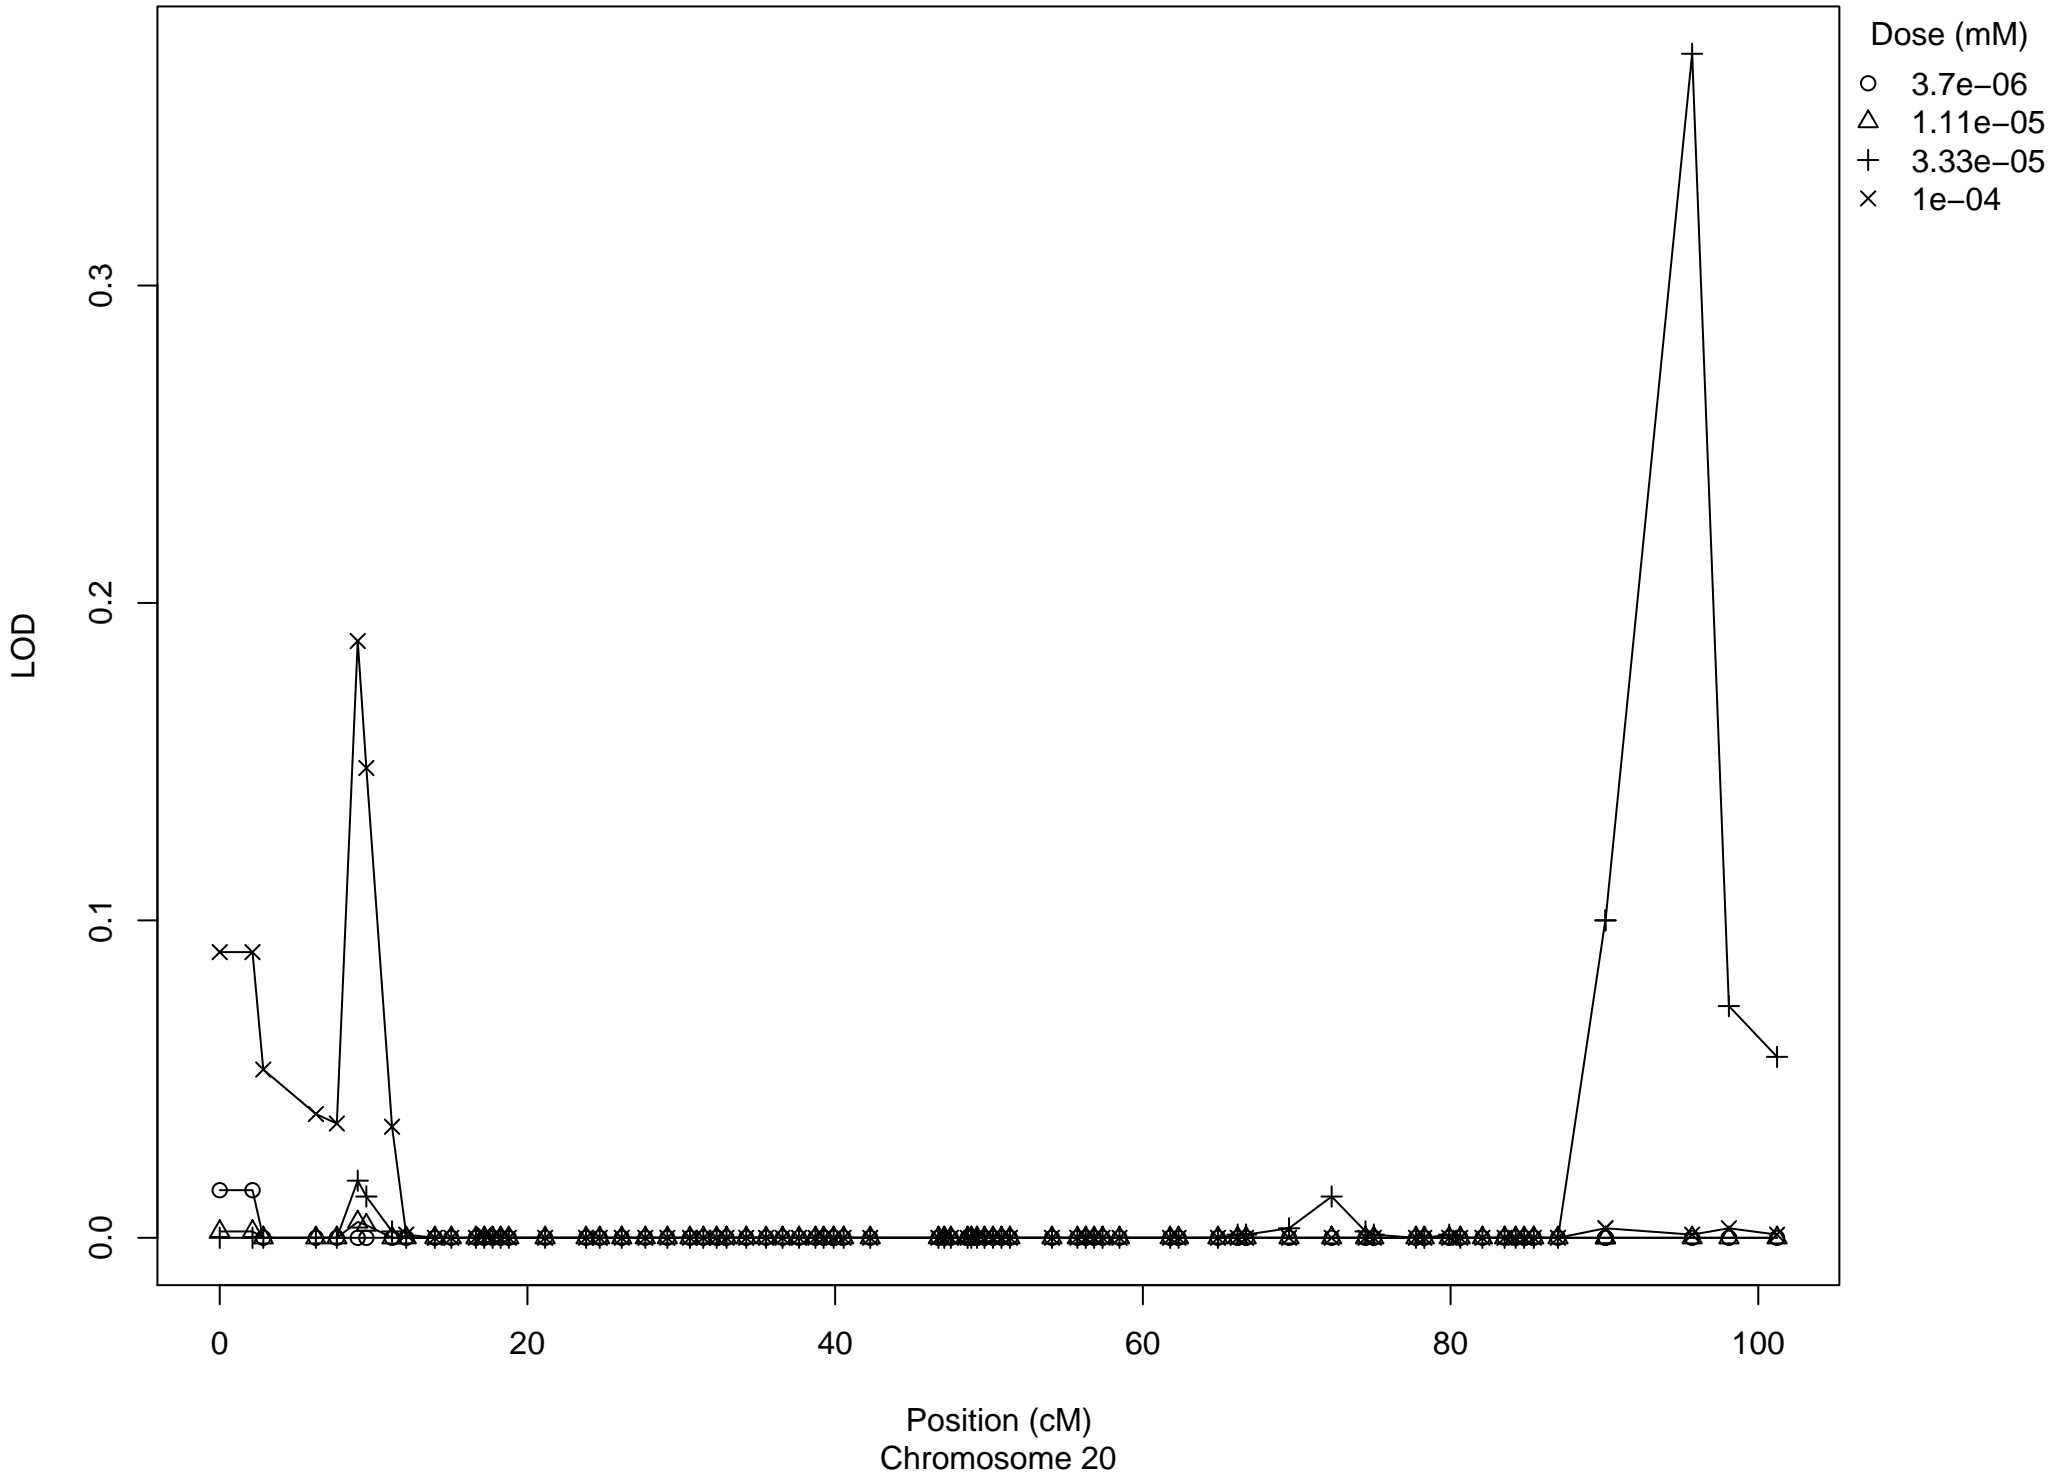

# Mitoxantrone dihydrochloride (Mitox)

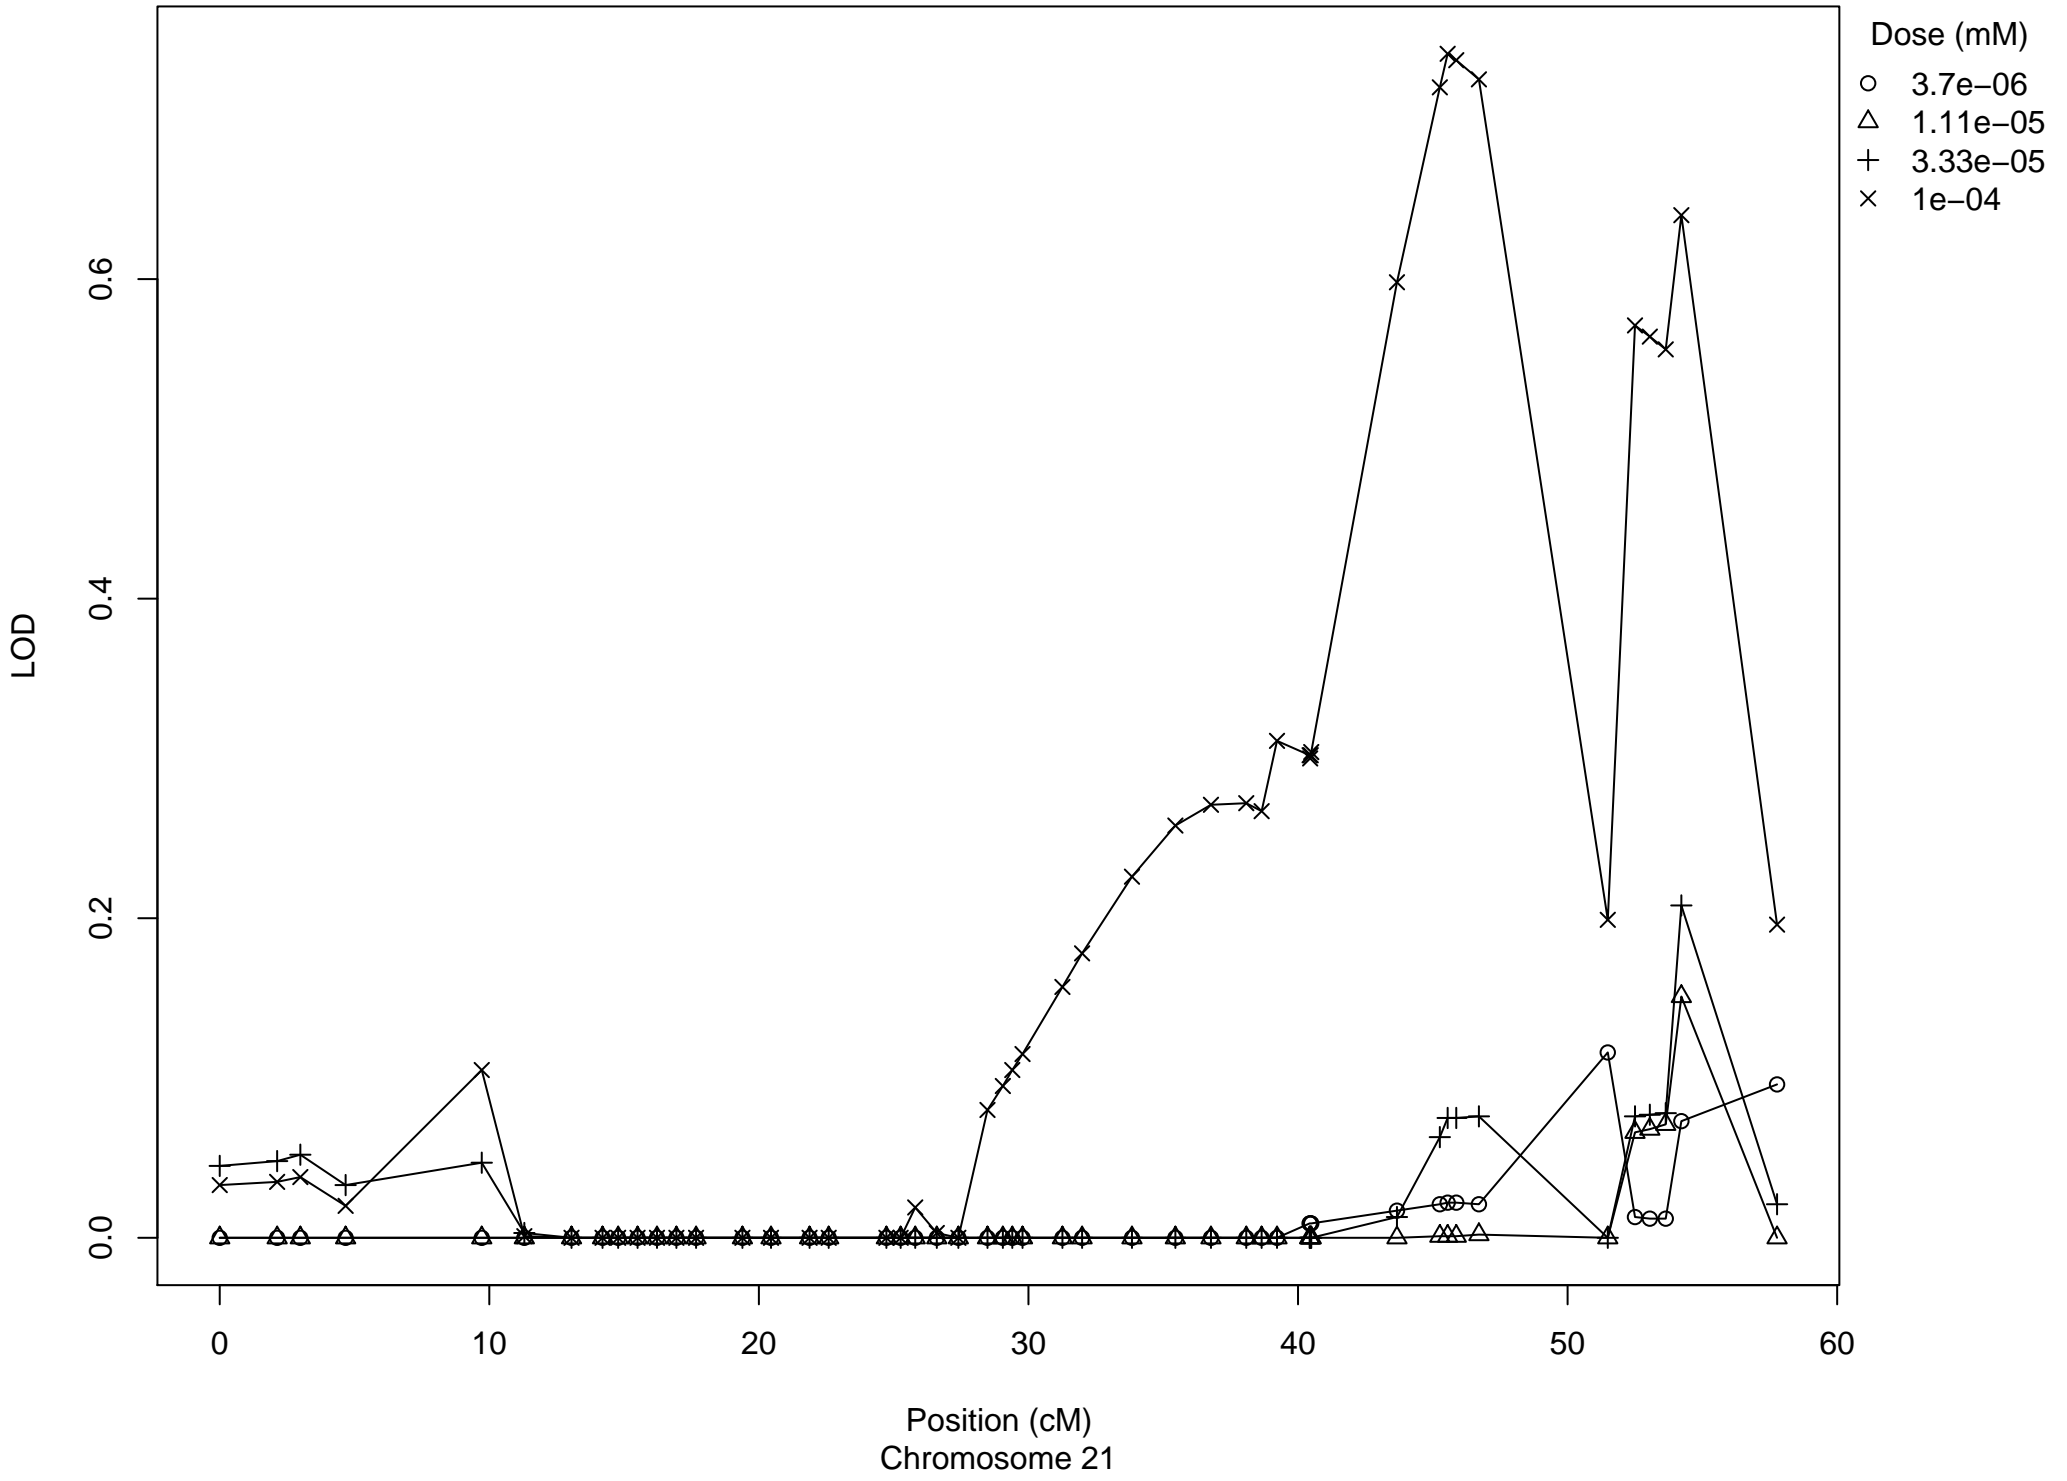

# Mitoxantrone dihydrochloride (Mitox)

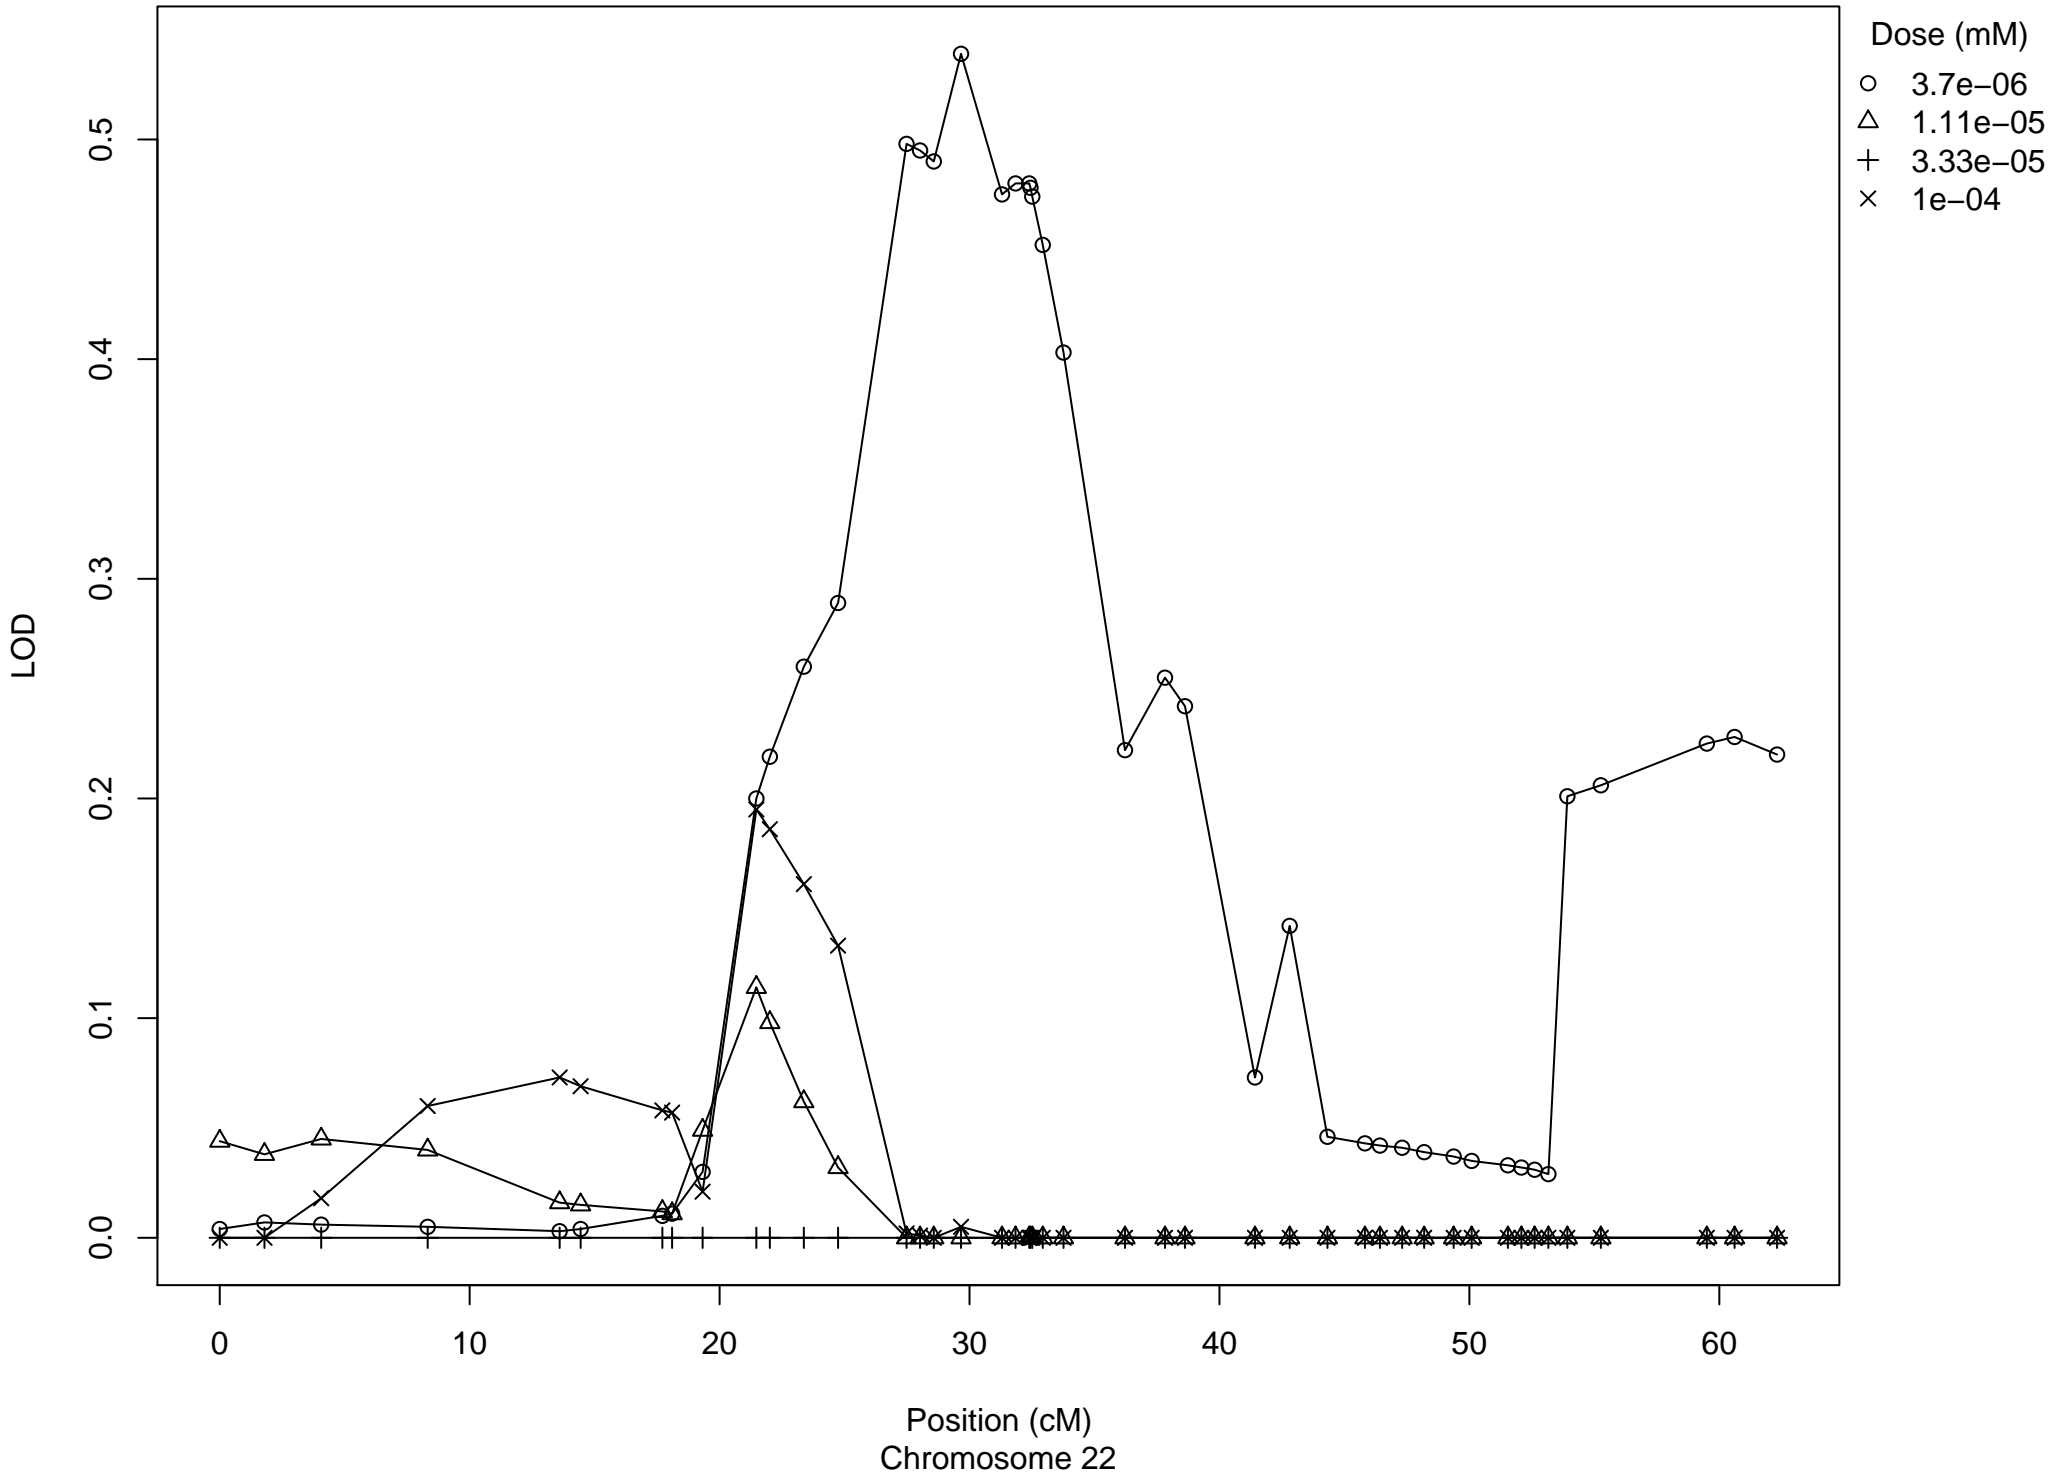



# Oxaliplatin (Oxal)

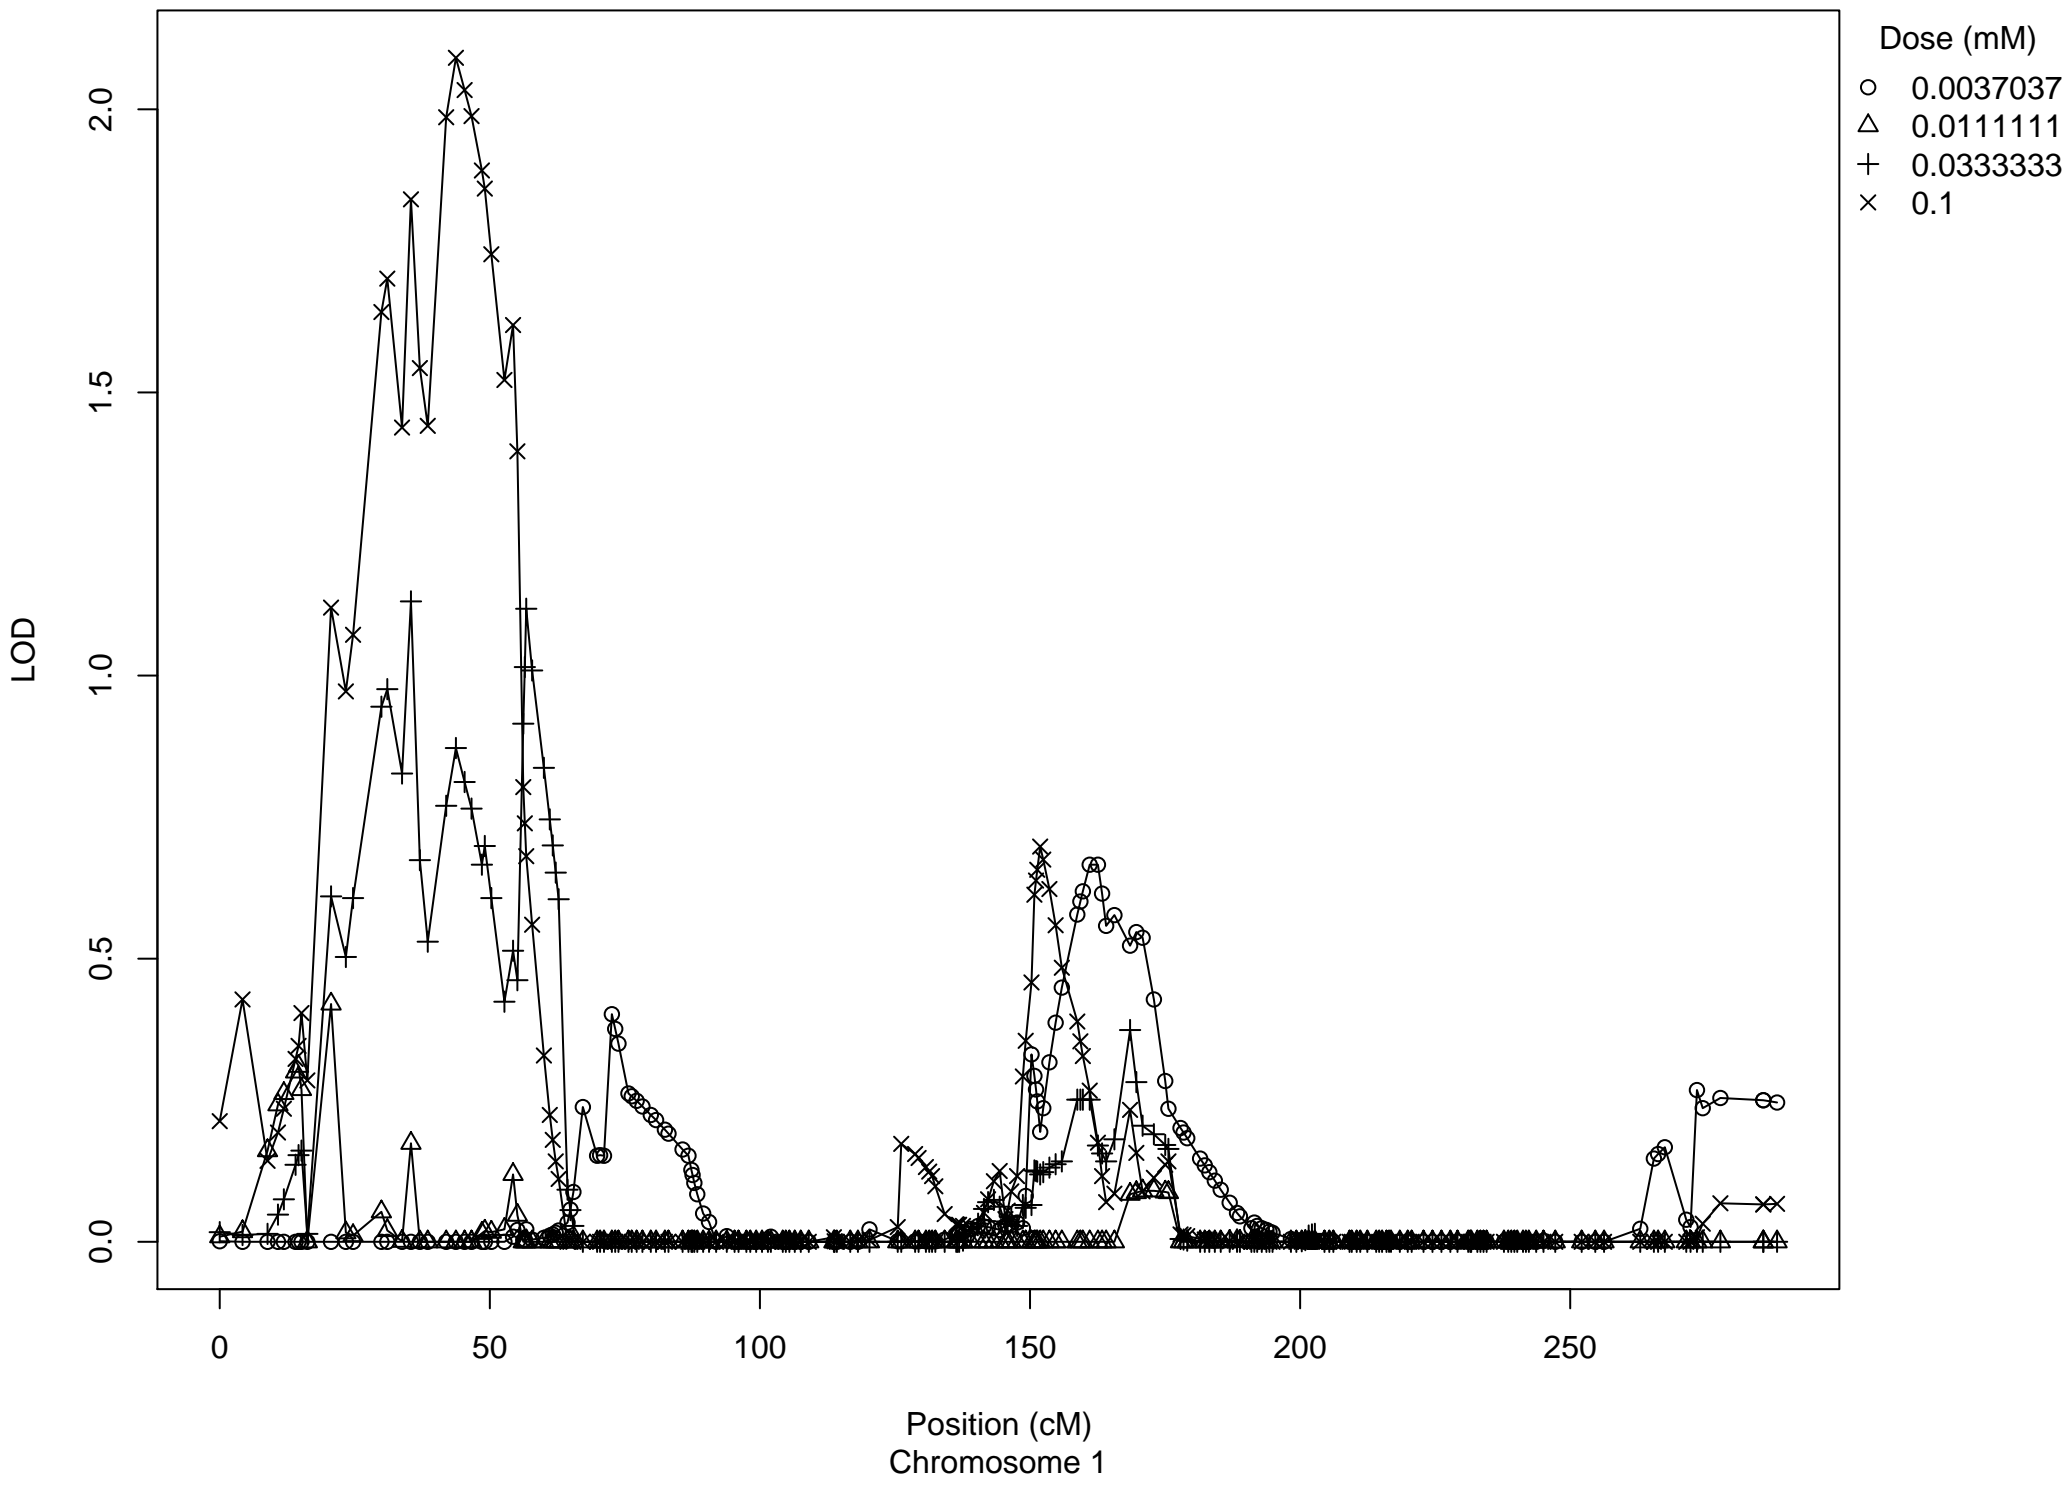

# Oxaliplatin (Oxal)

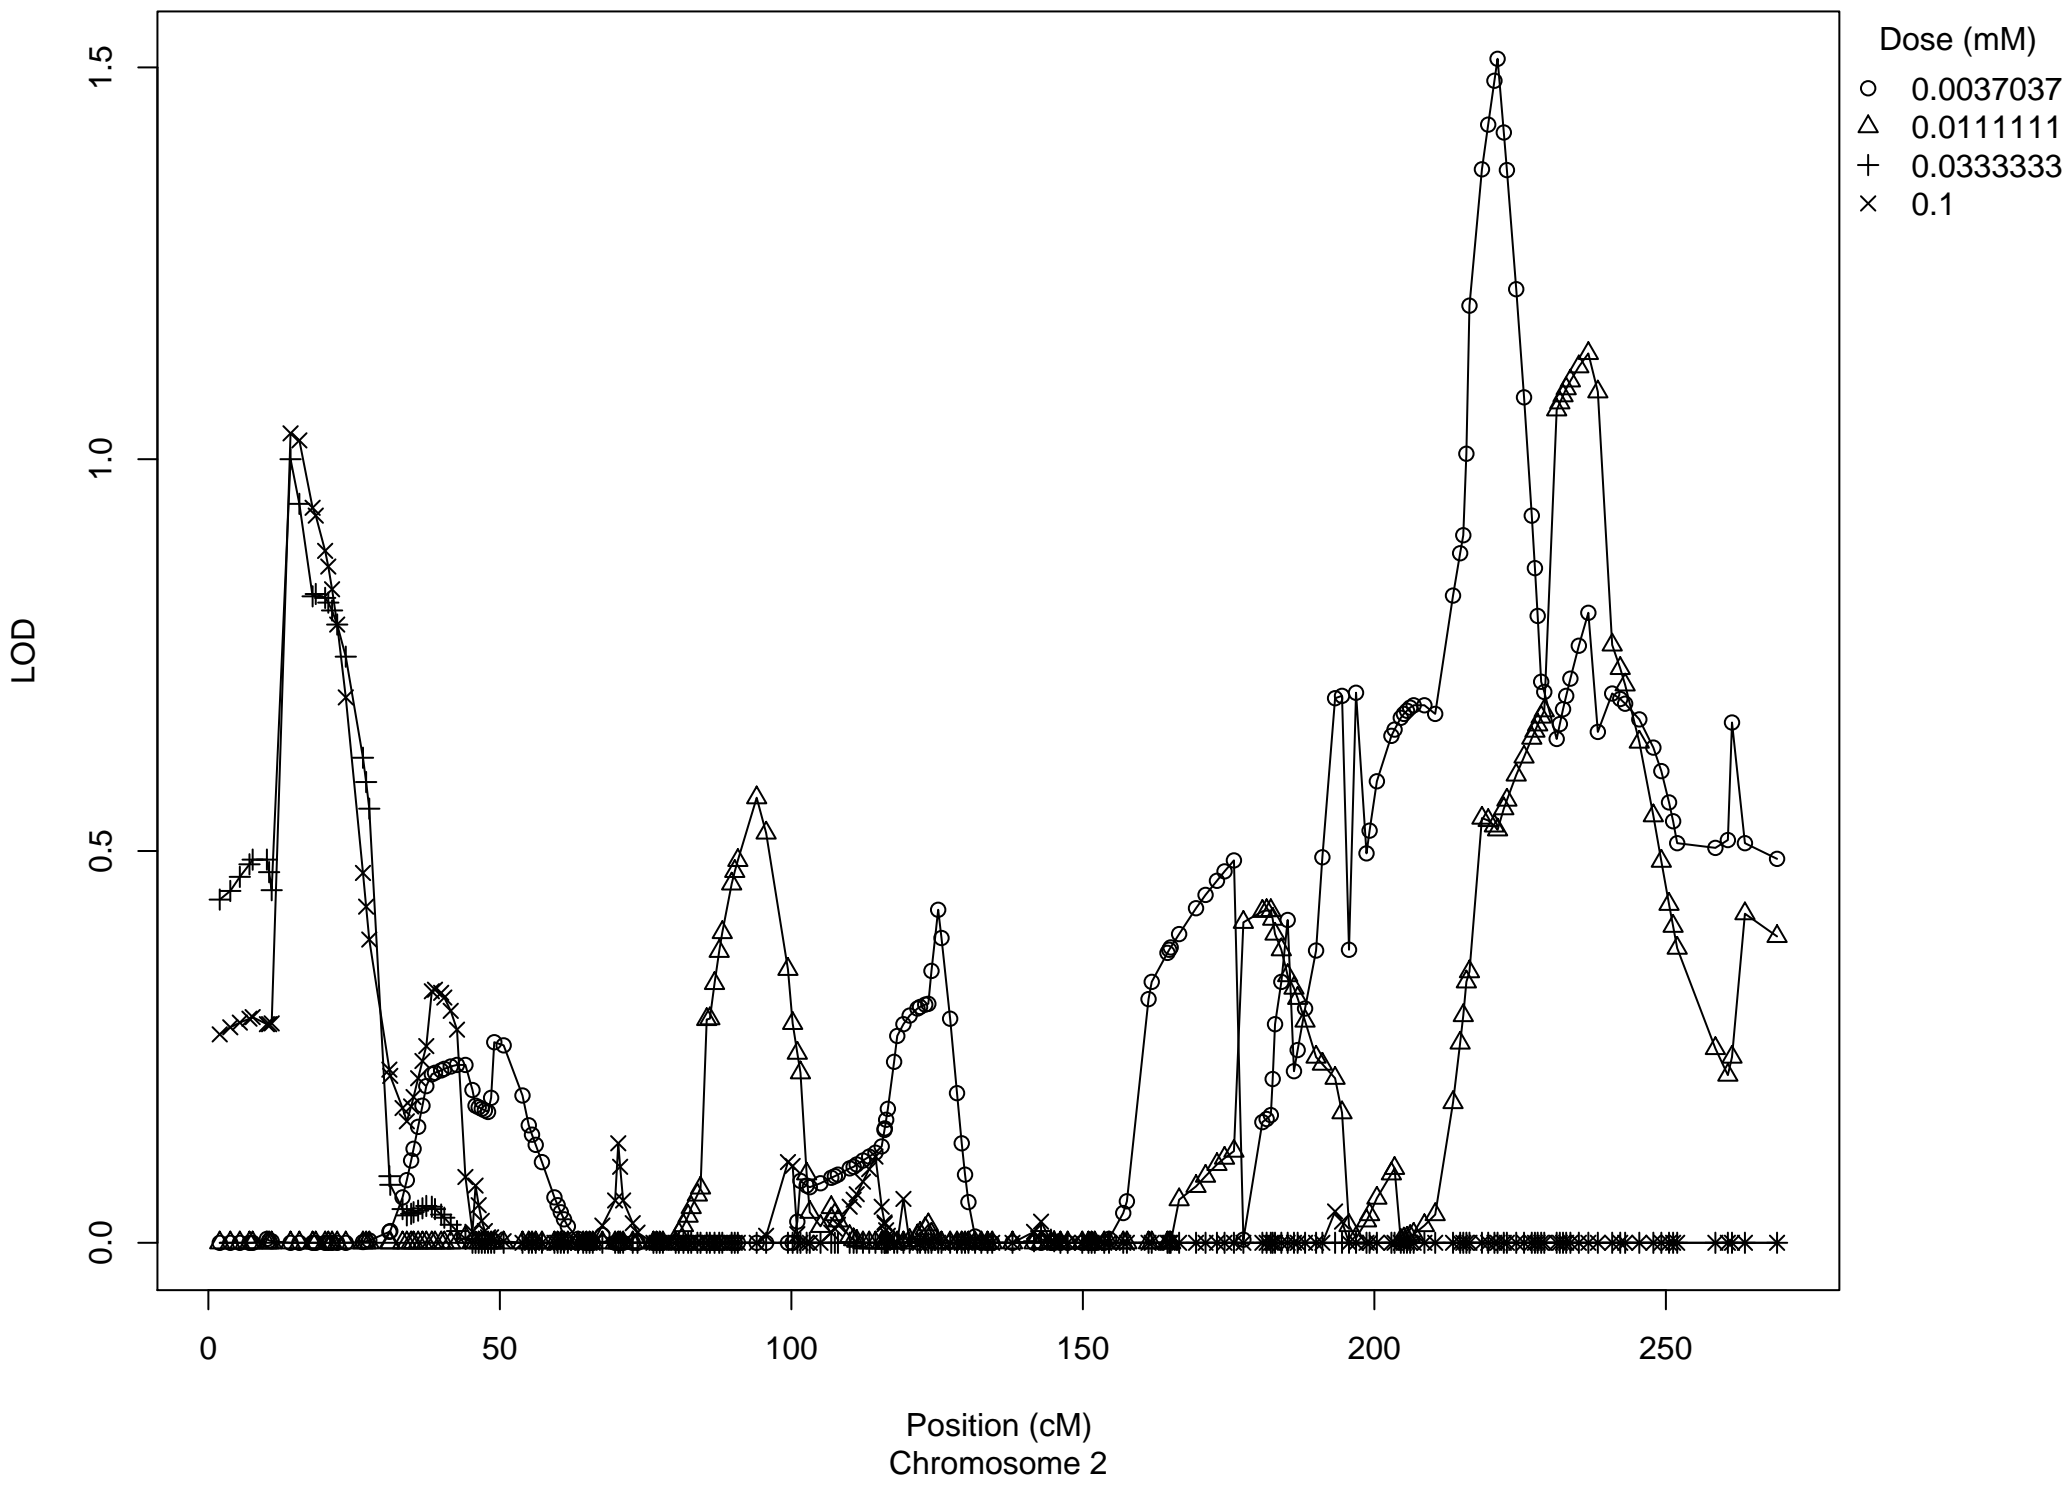

# Oxaliplatin (Oxal)

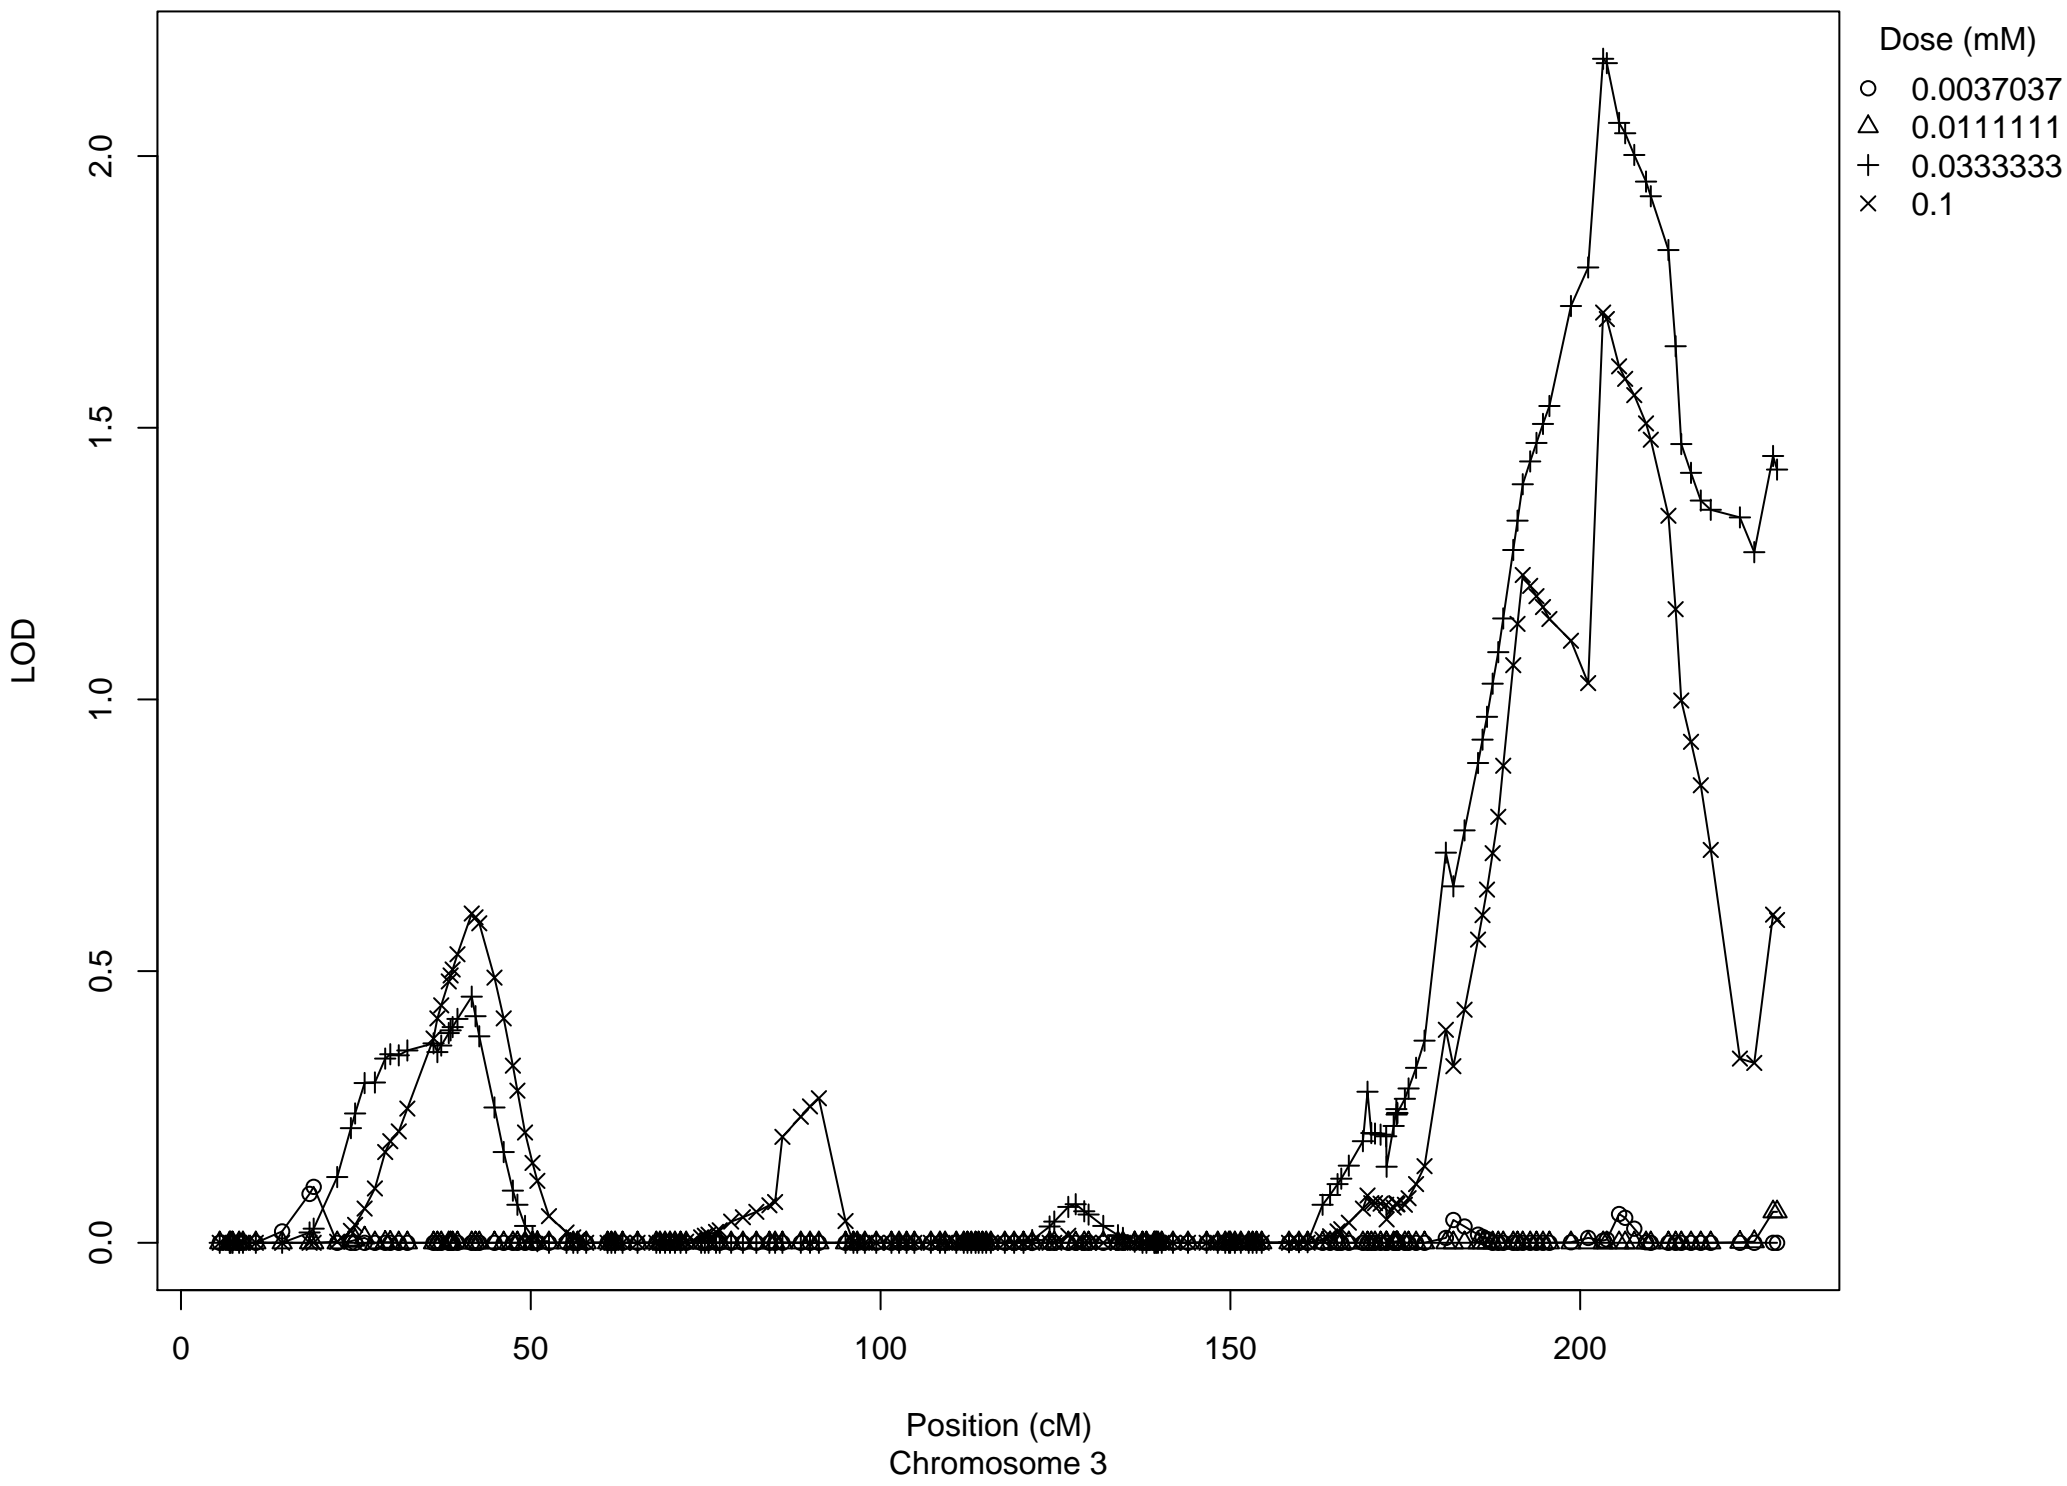

# Oxaliplatin (Oxal)

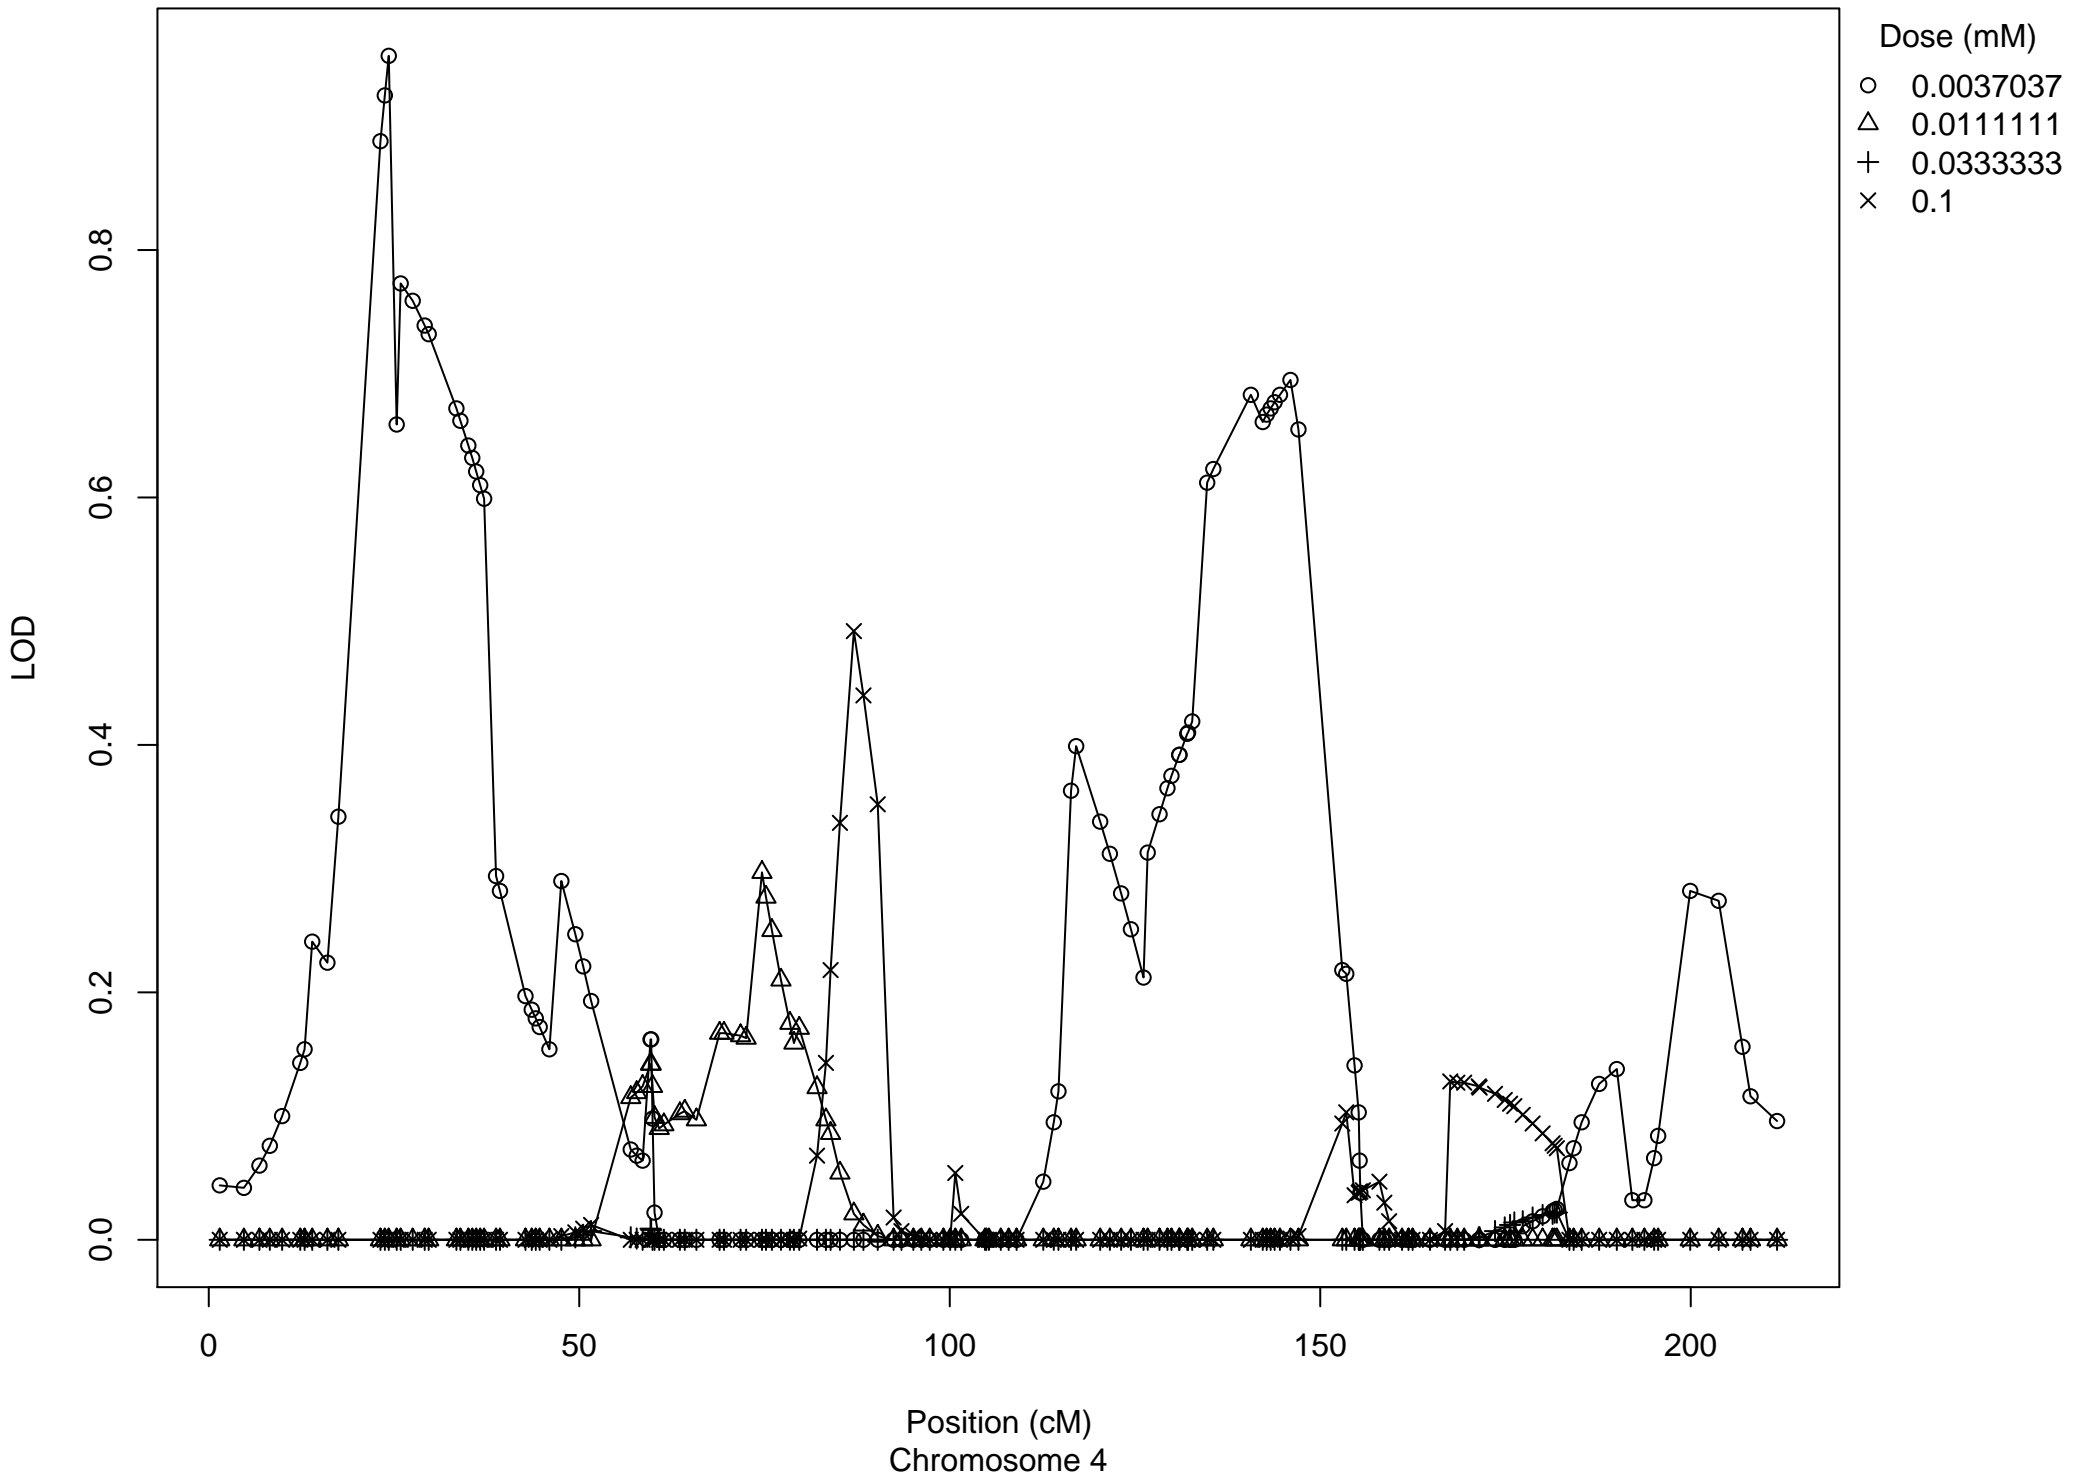

# Oxaliplatin (Oxal)

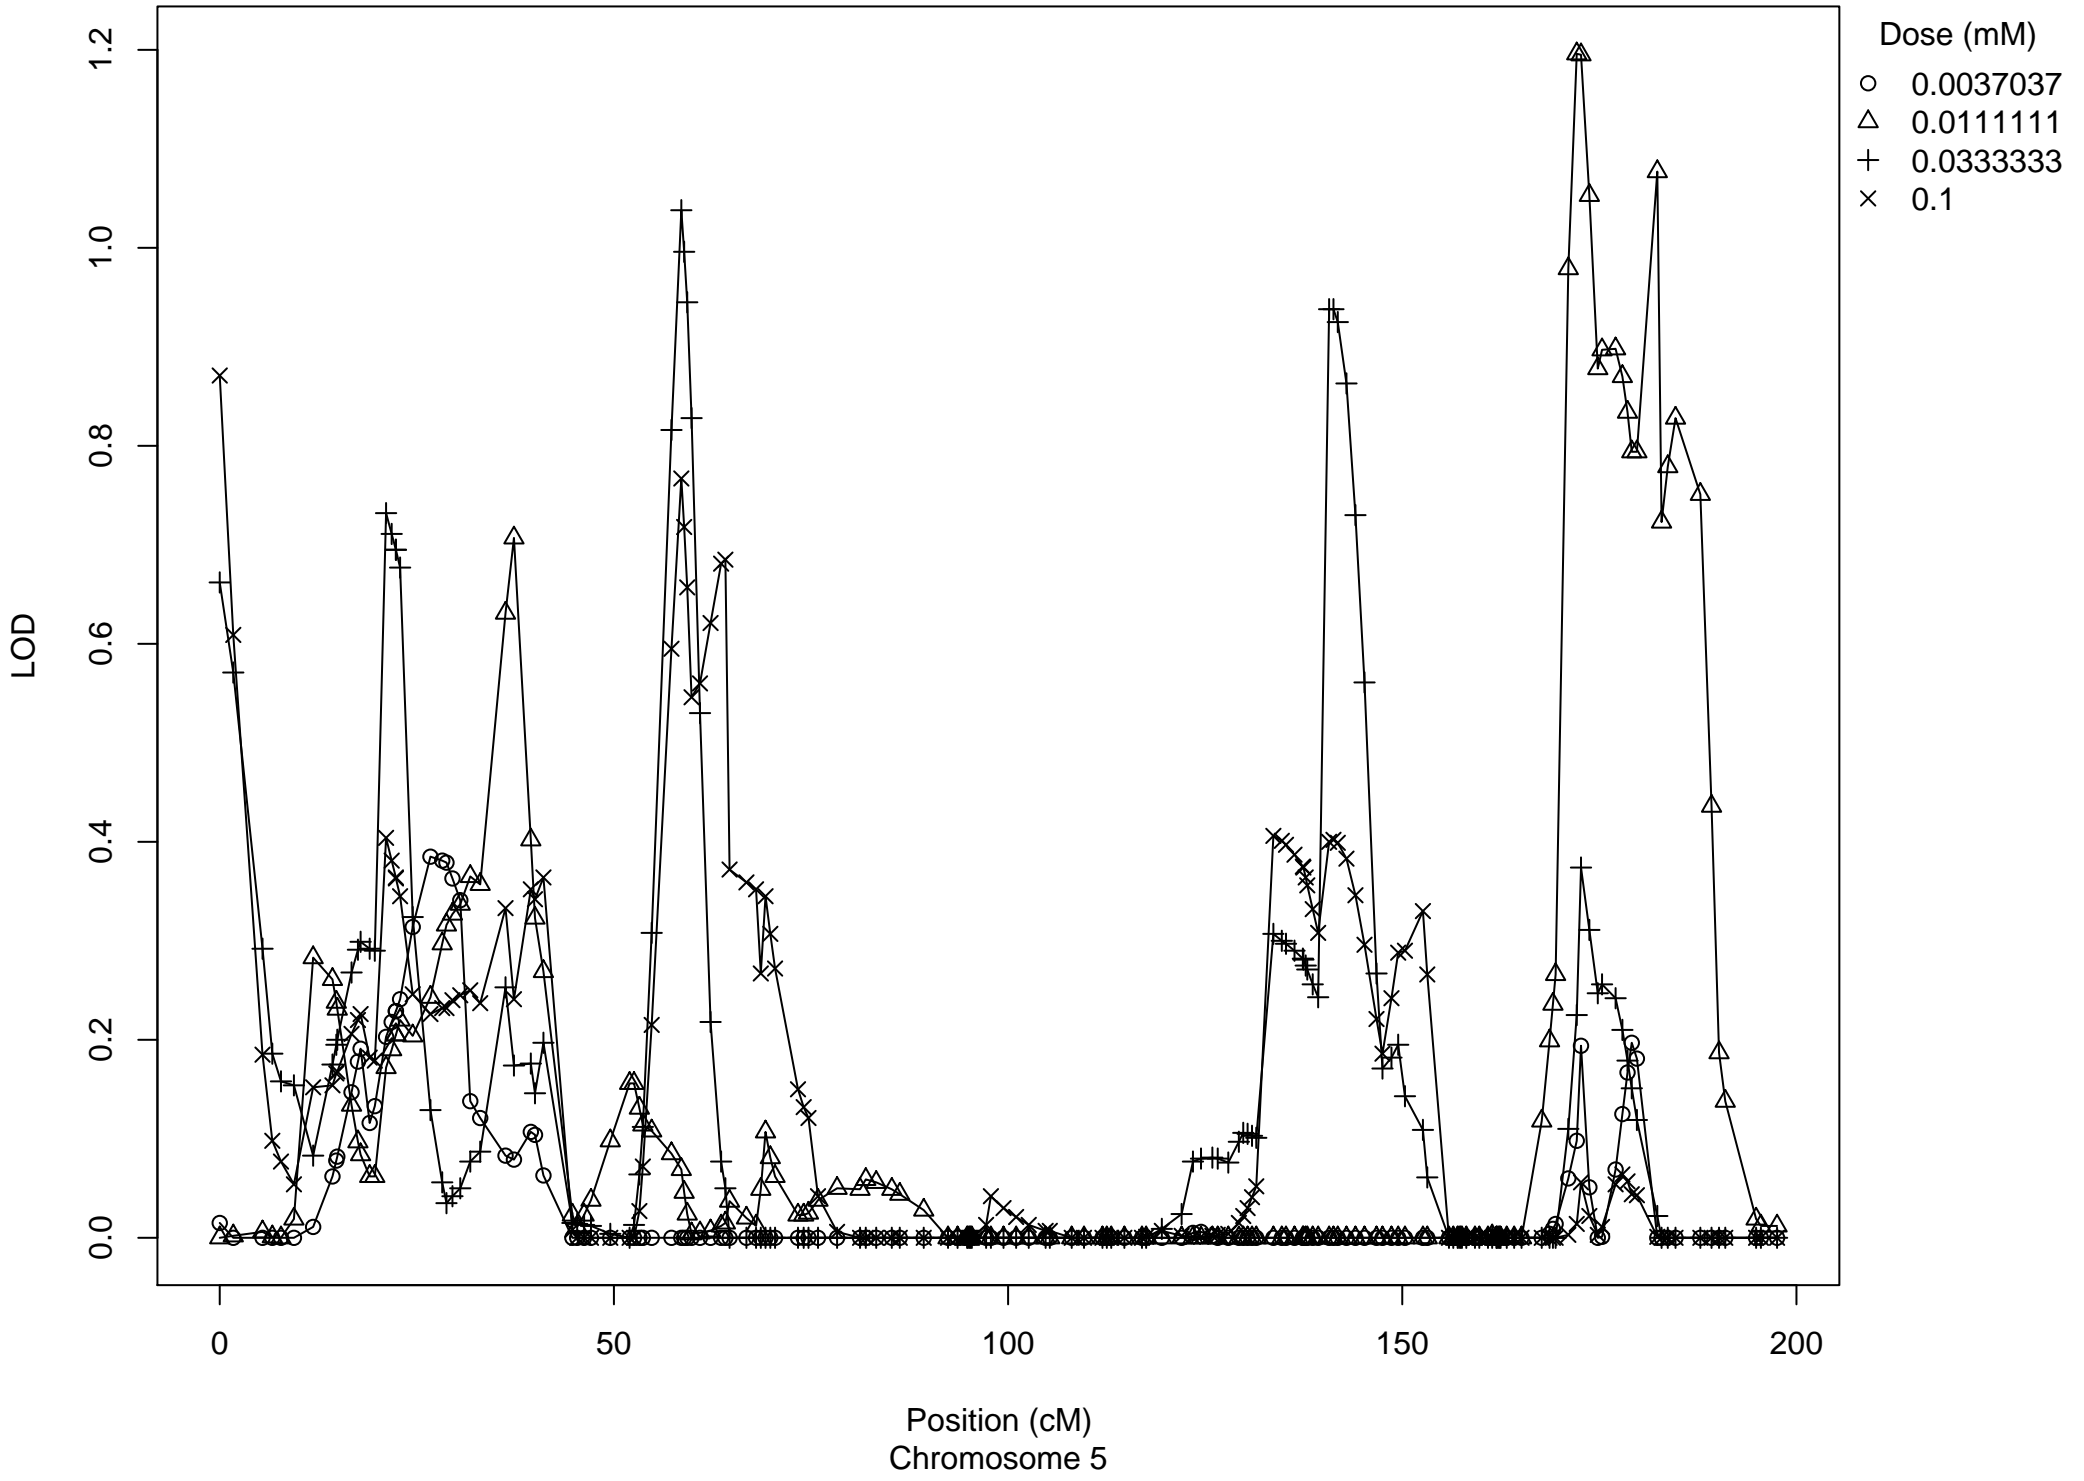

# Oxaliplatin (Oxal)

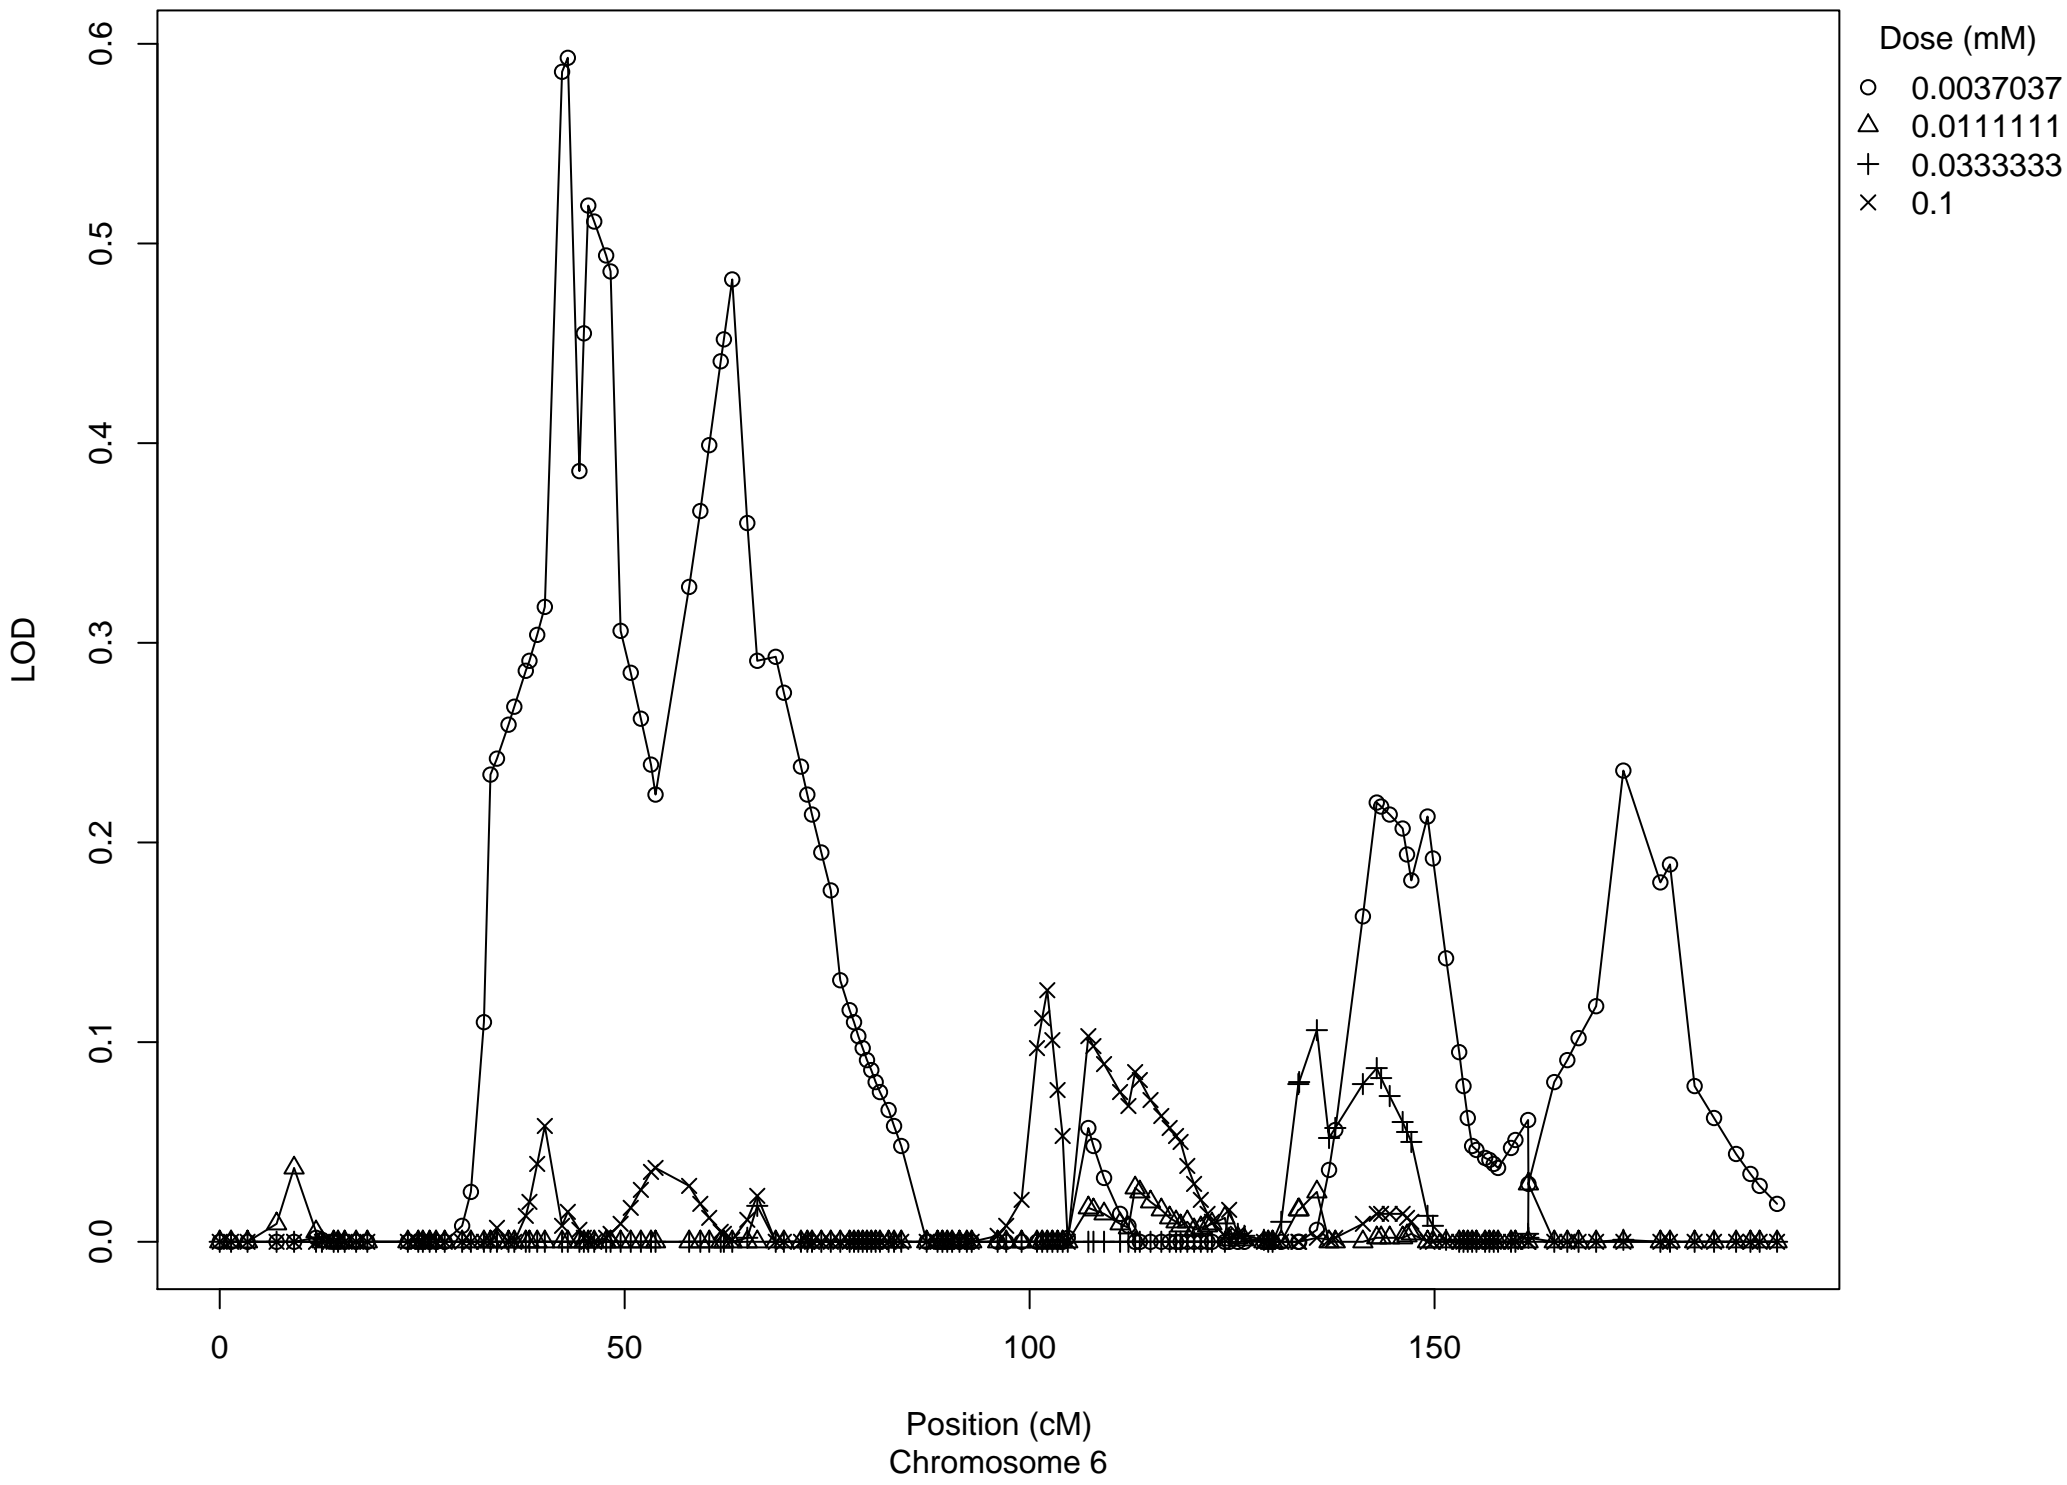

# Oxaliplatin (Oxal)

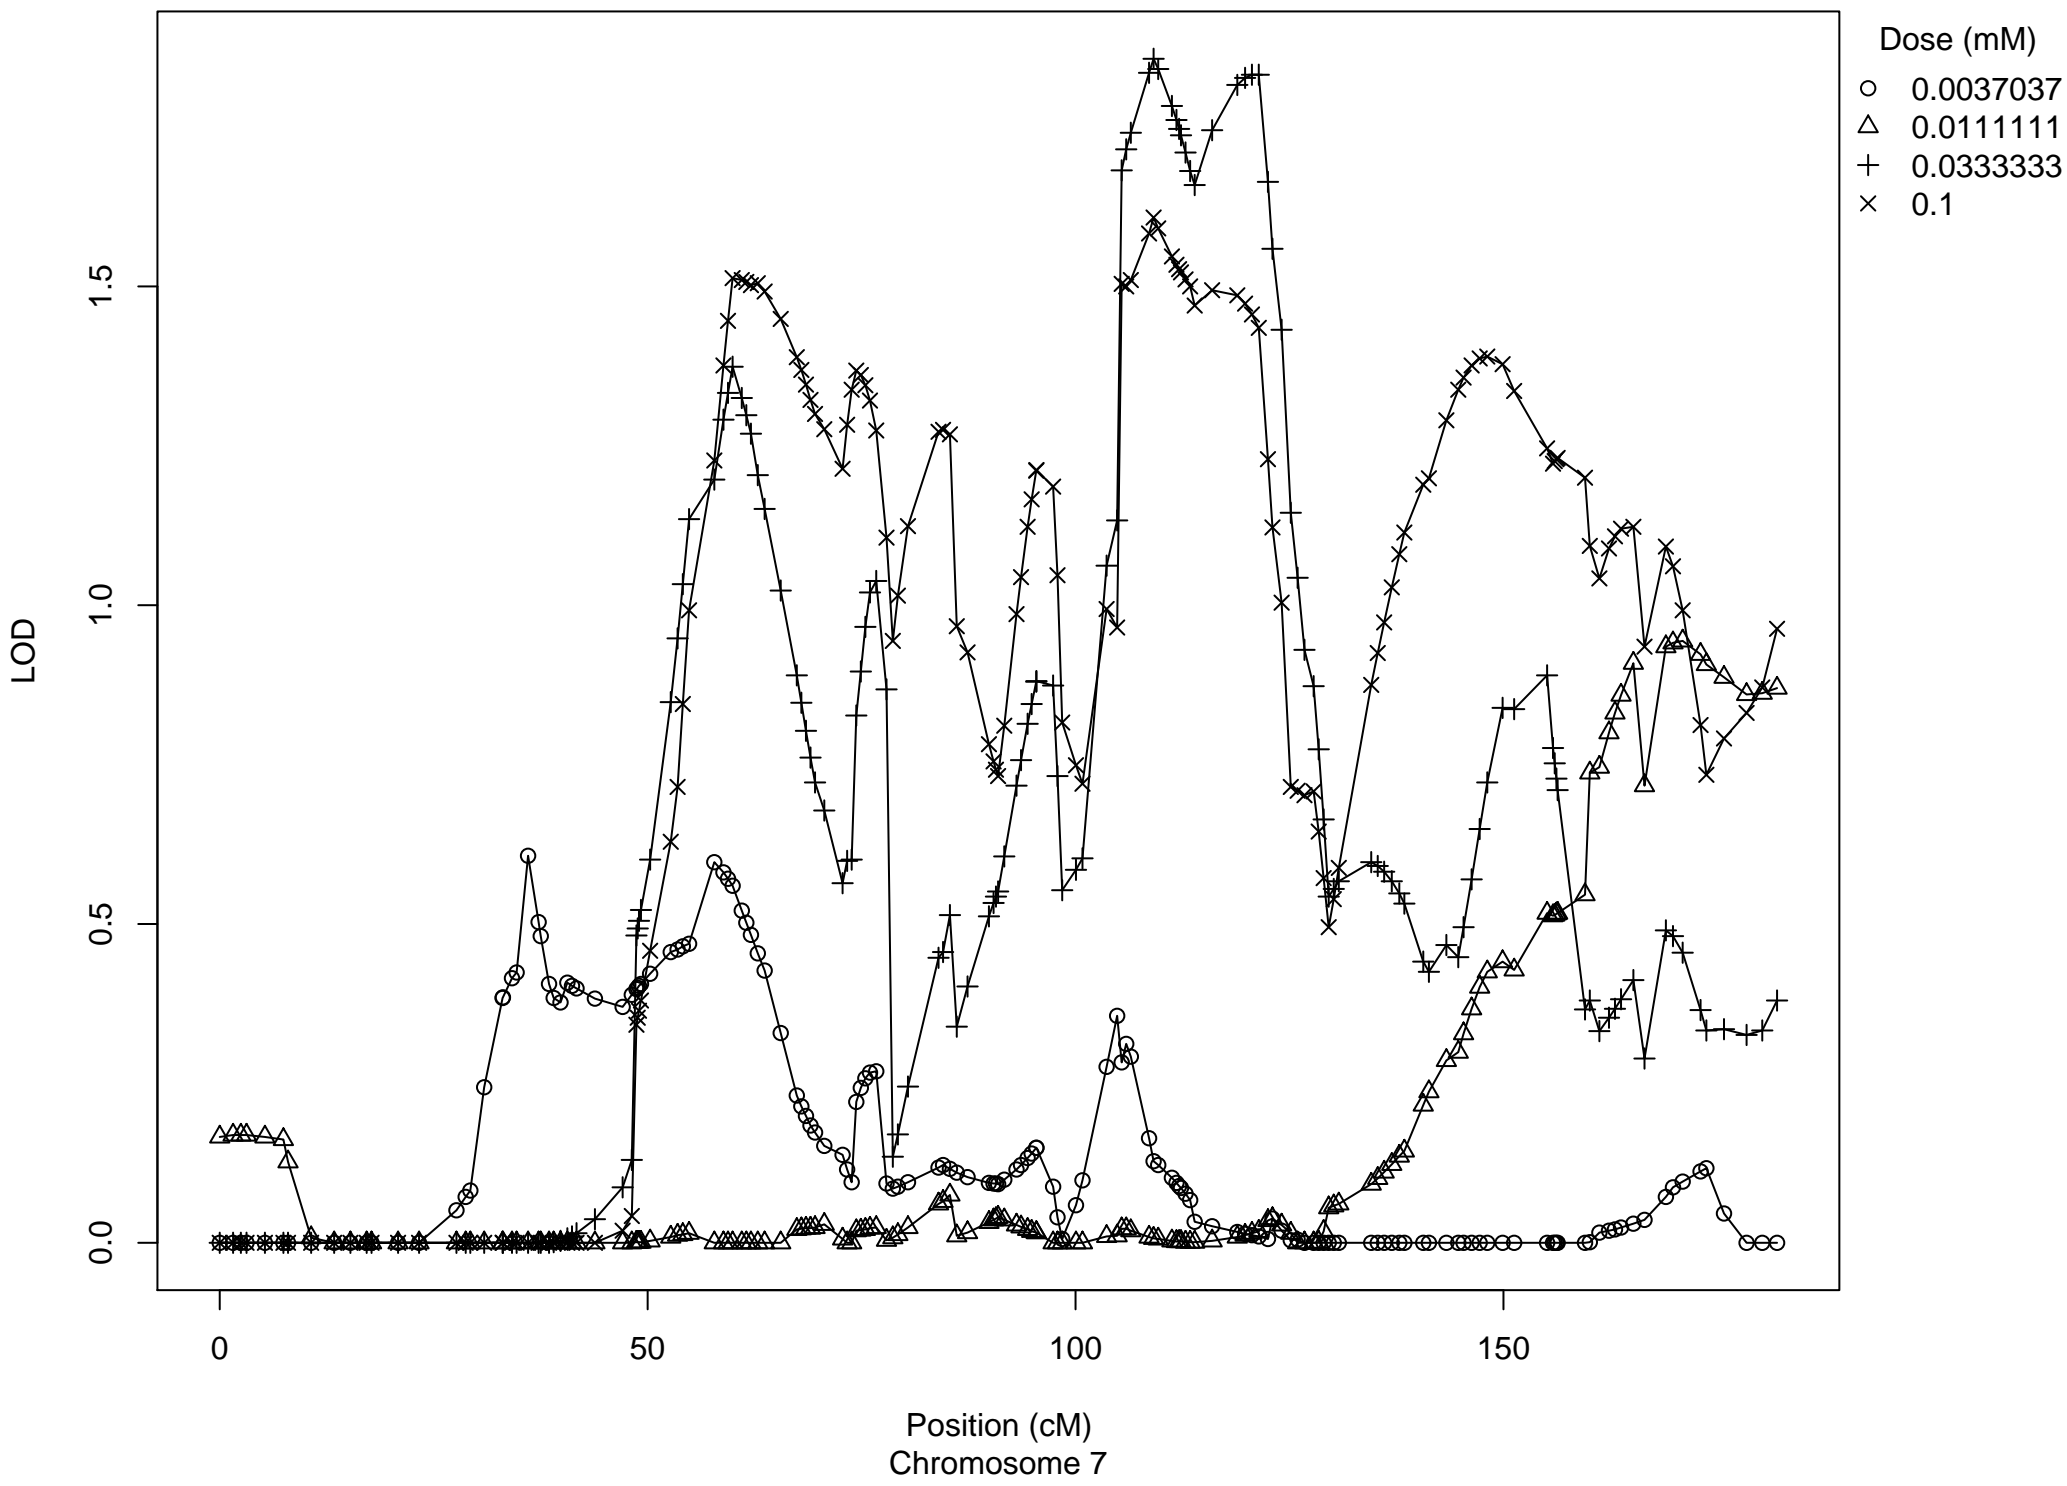

# Oxaliplatin (Oxal)

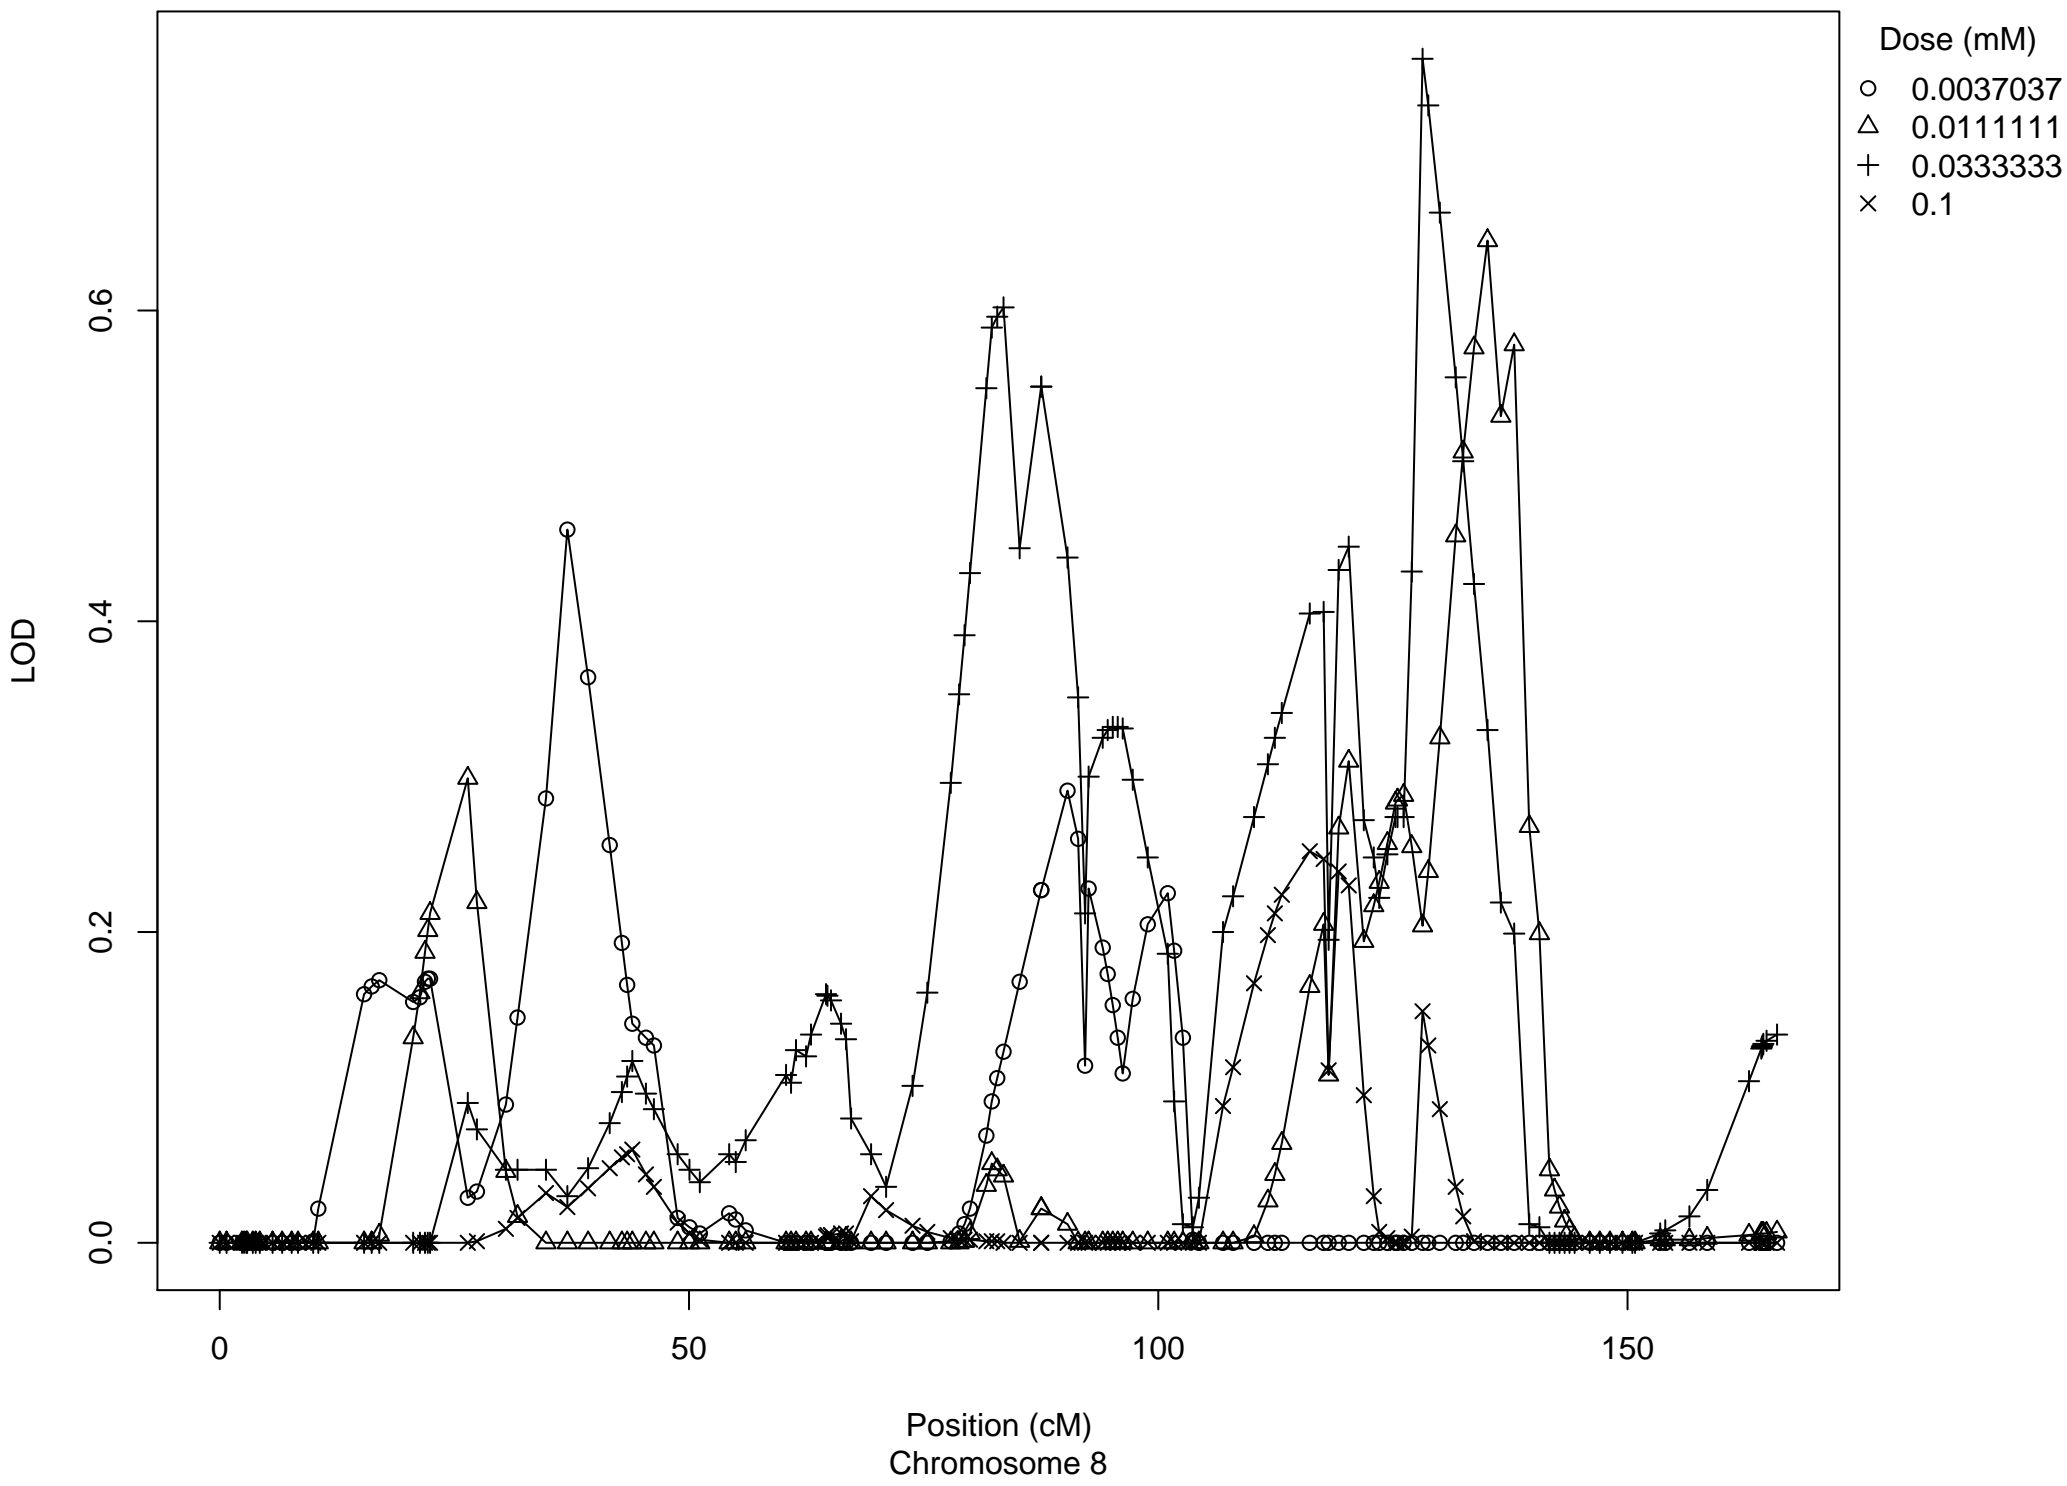



# Oxaliplatin (Oxal)

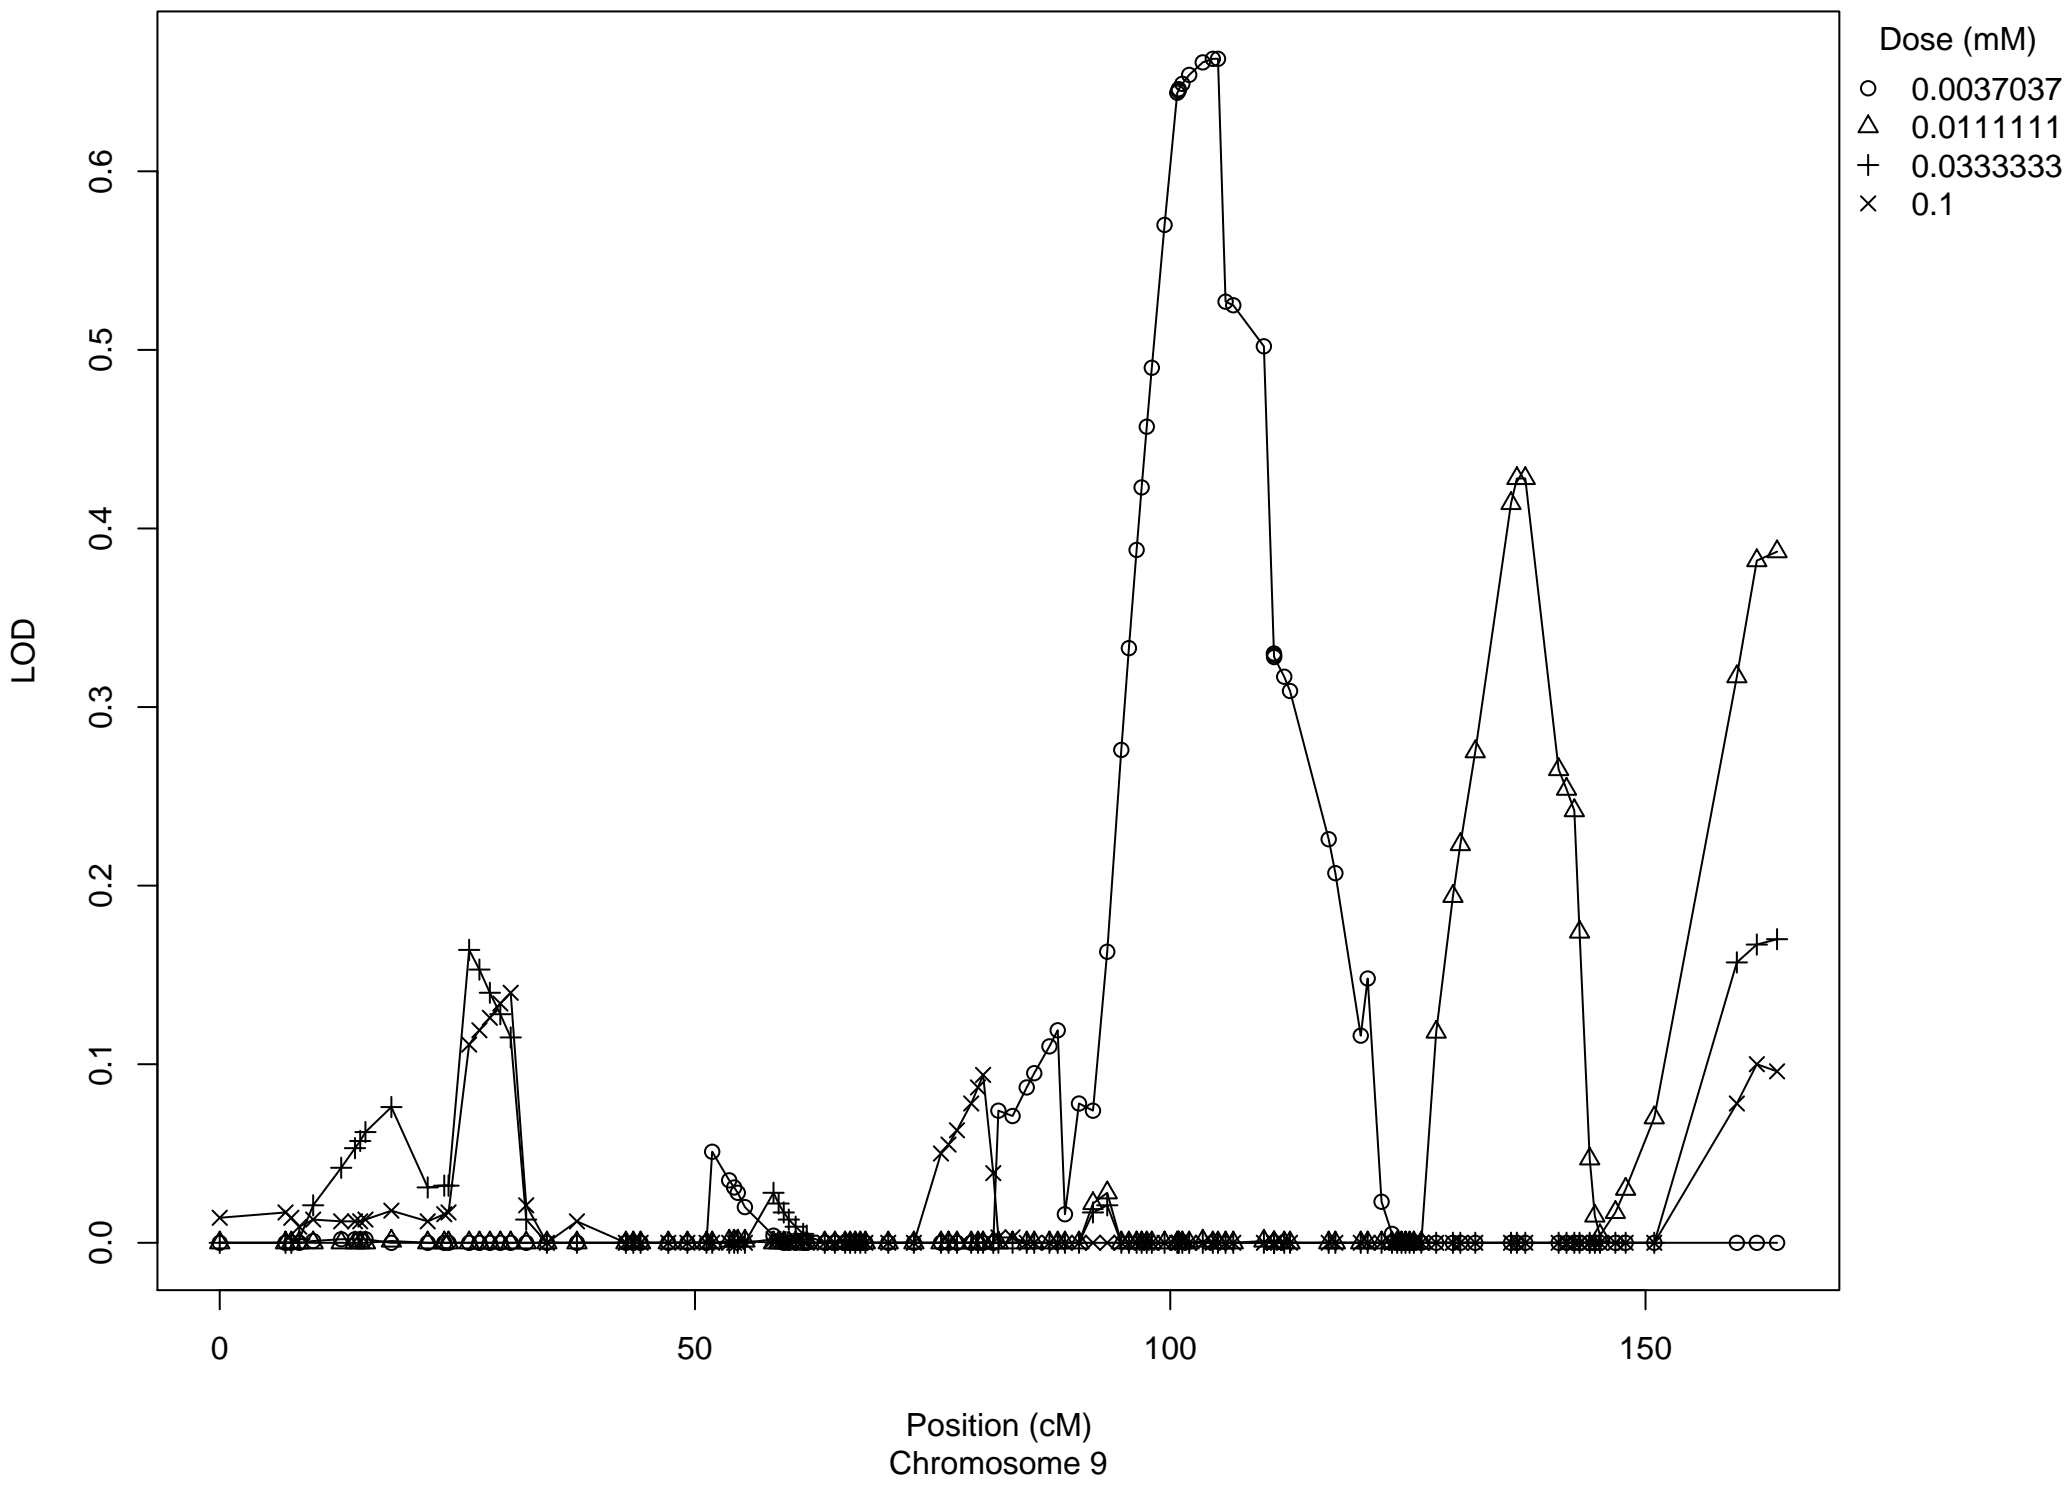

# Oxaliplatin (Oxal)

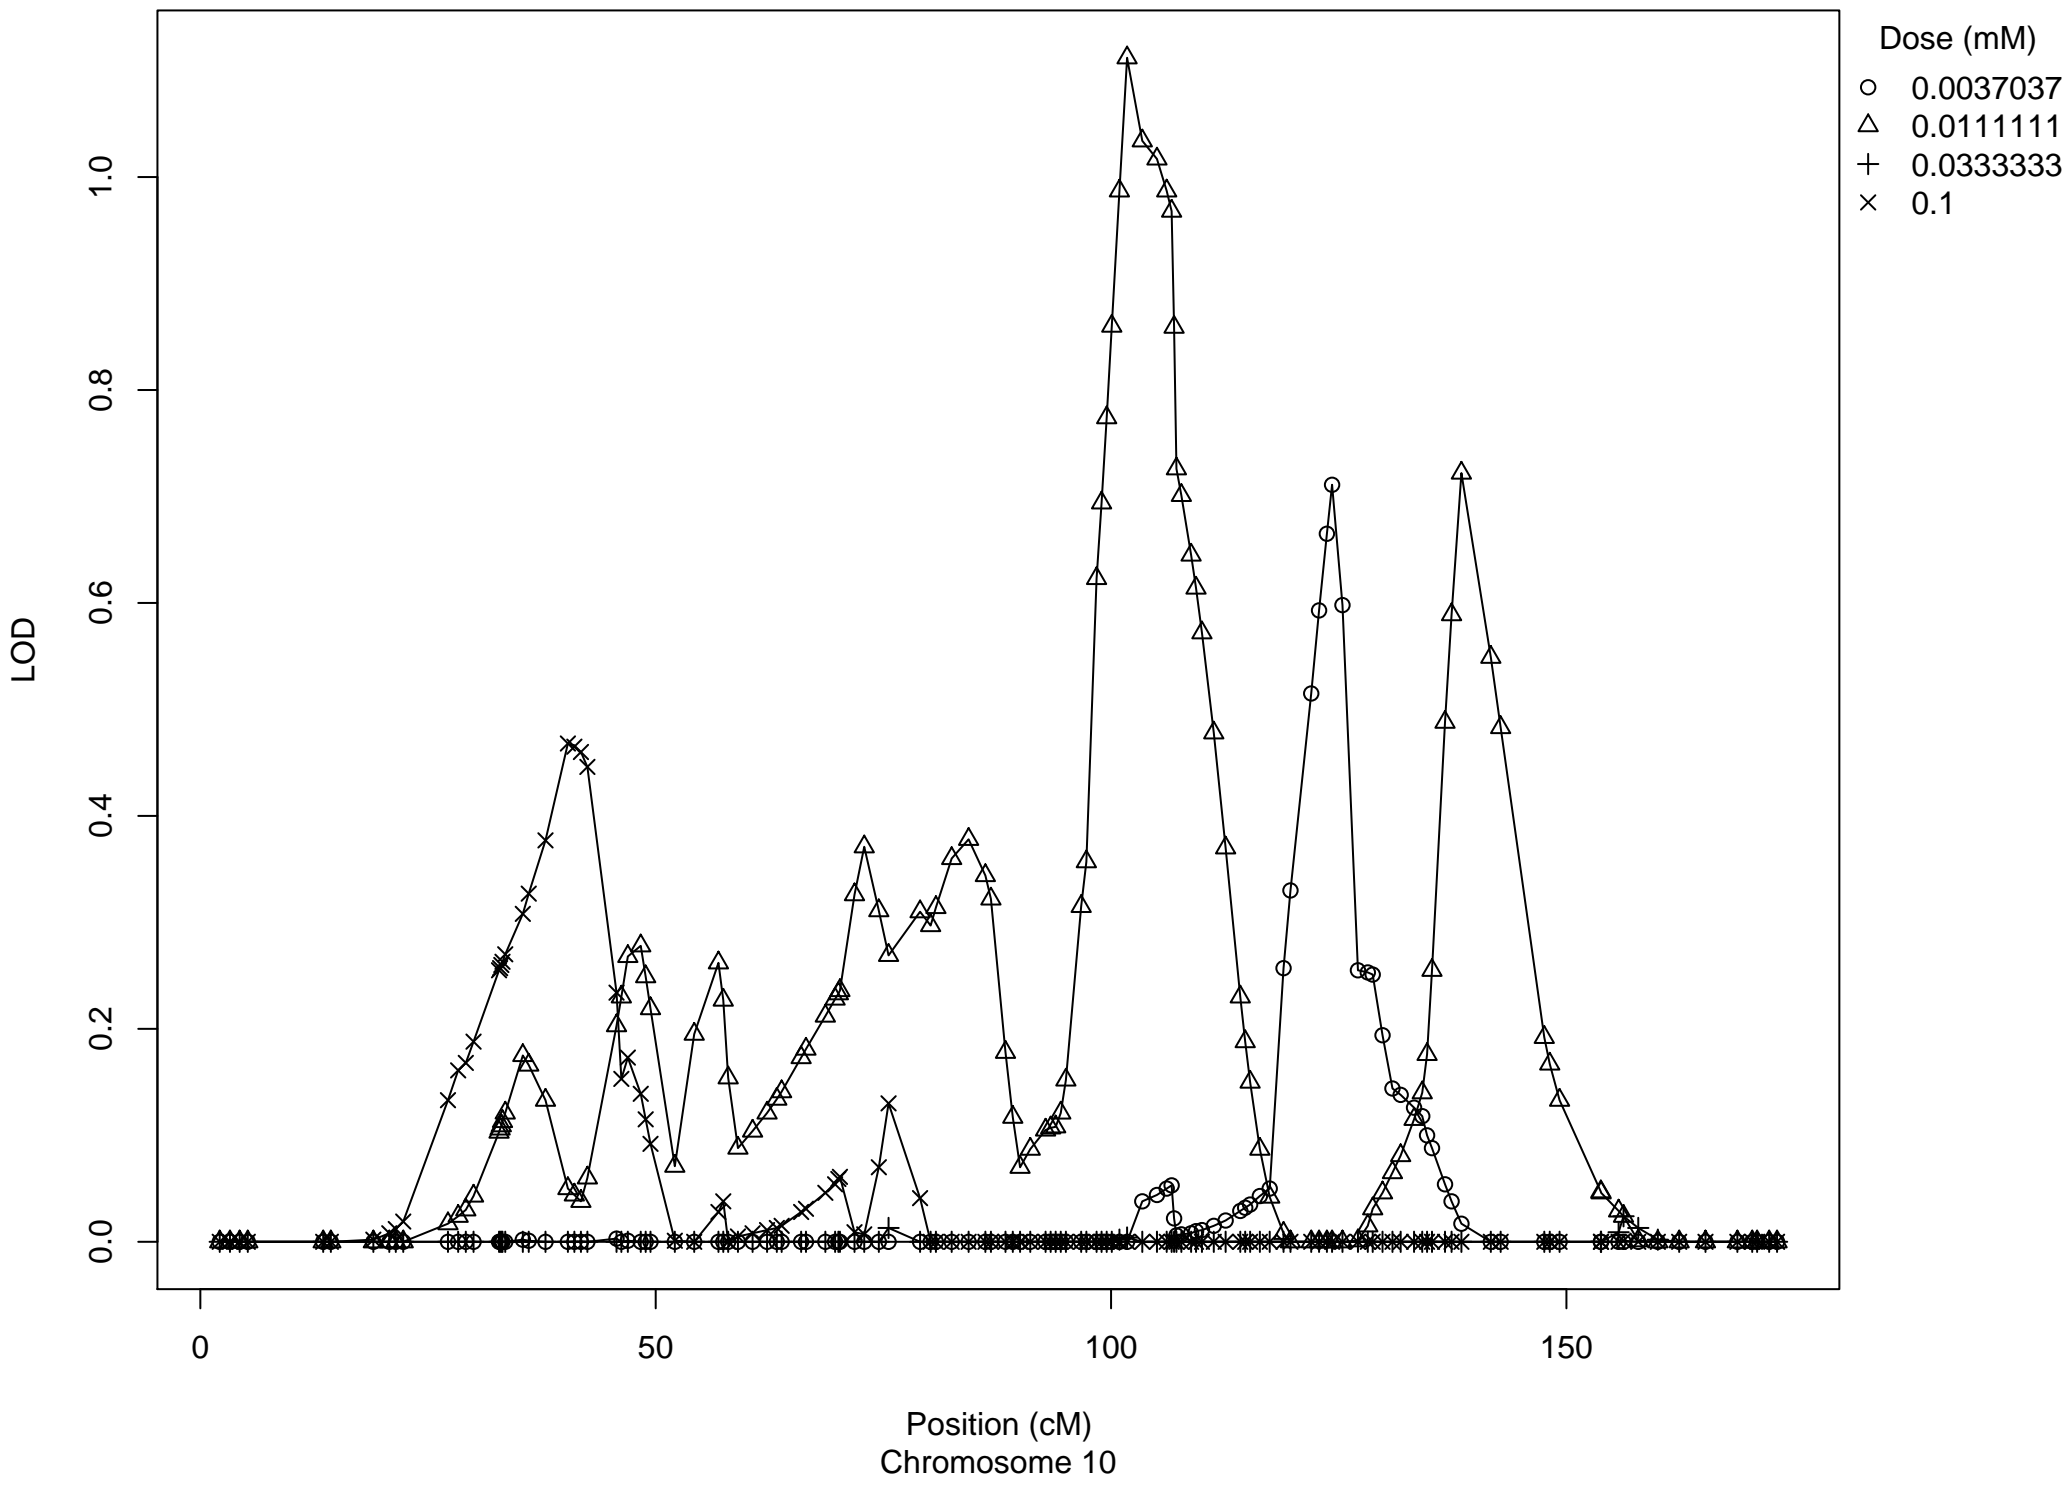

# Oxaliplatin (Oxal)

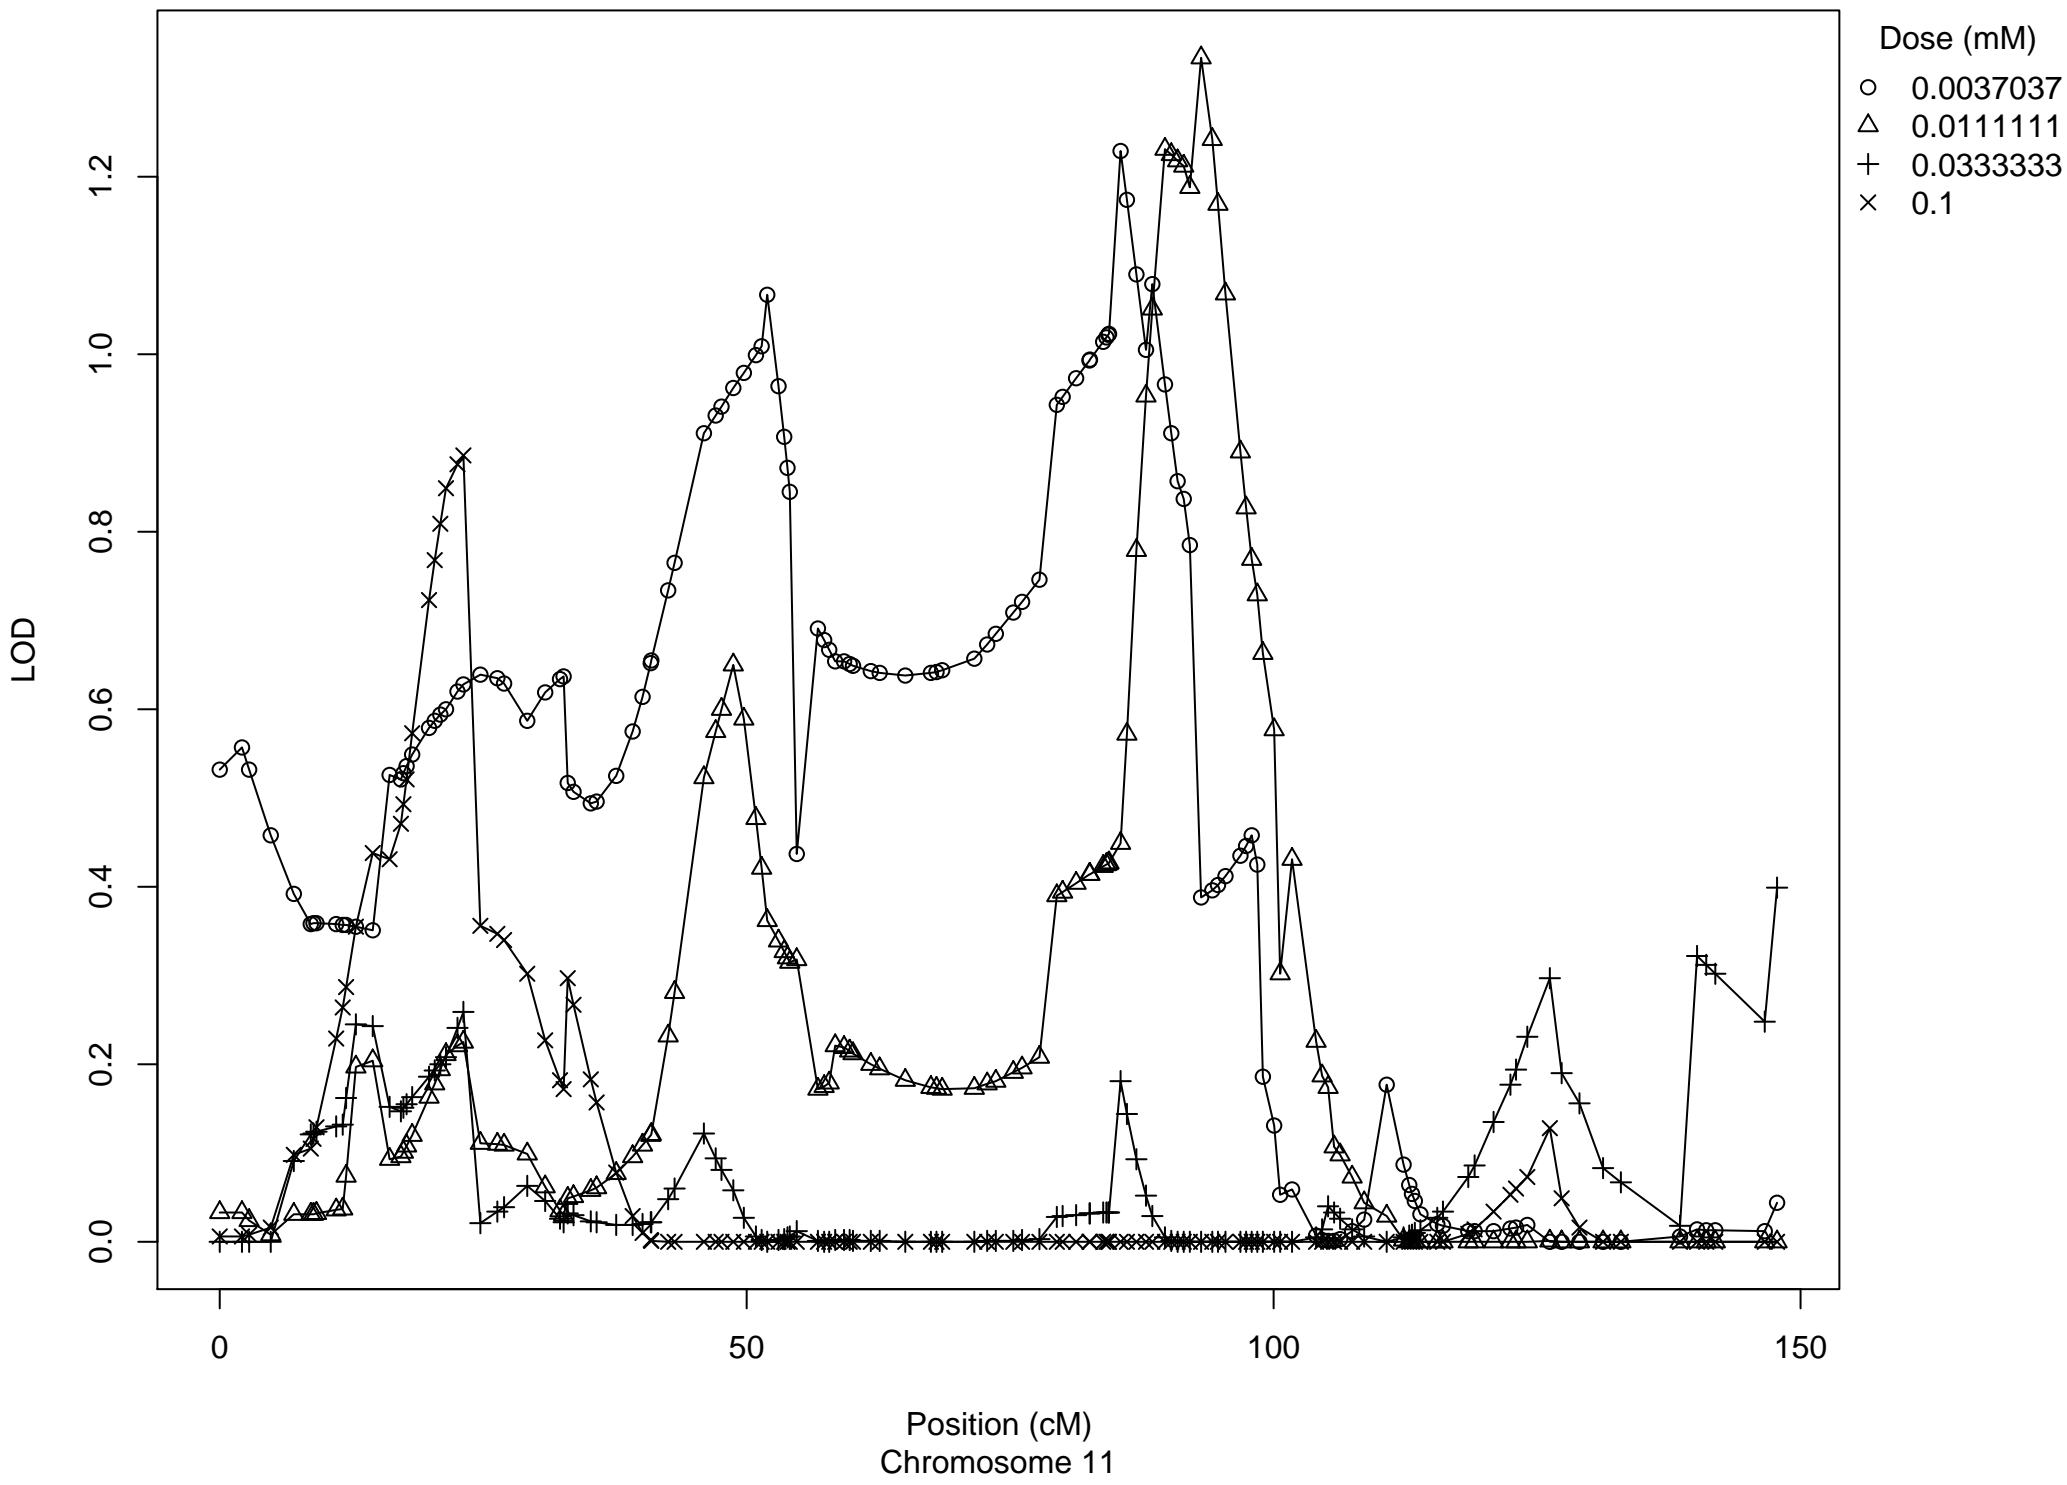

# Oxaliplatin (Oxal)

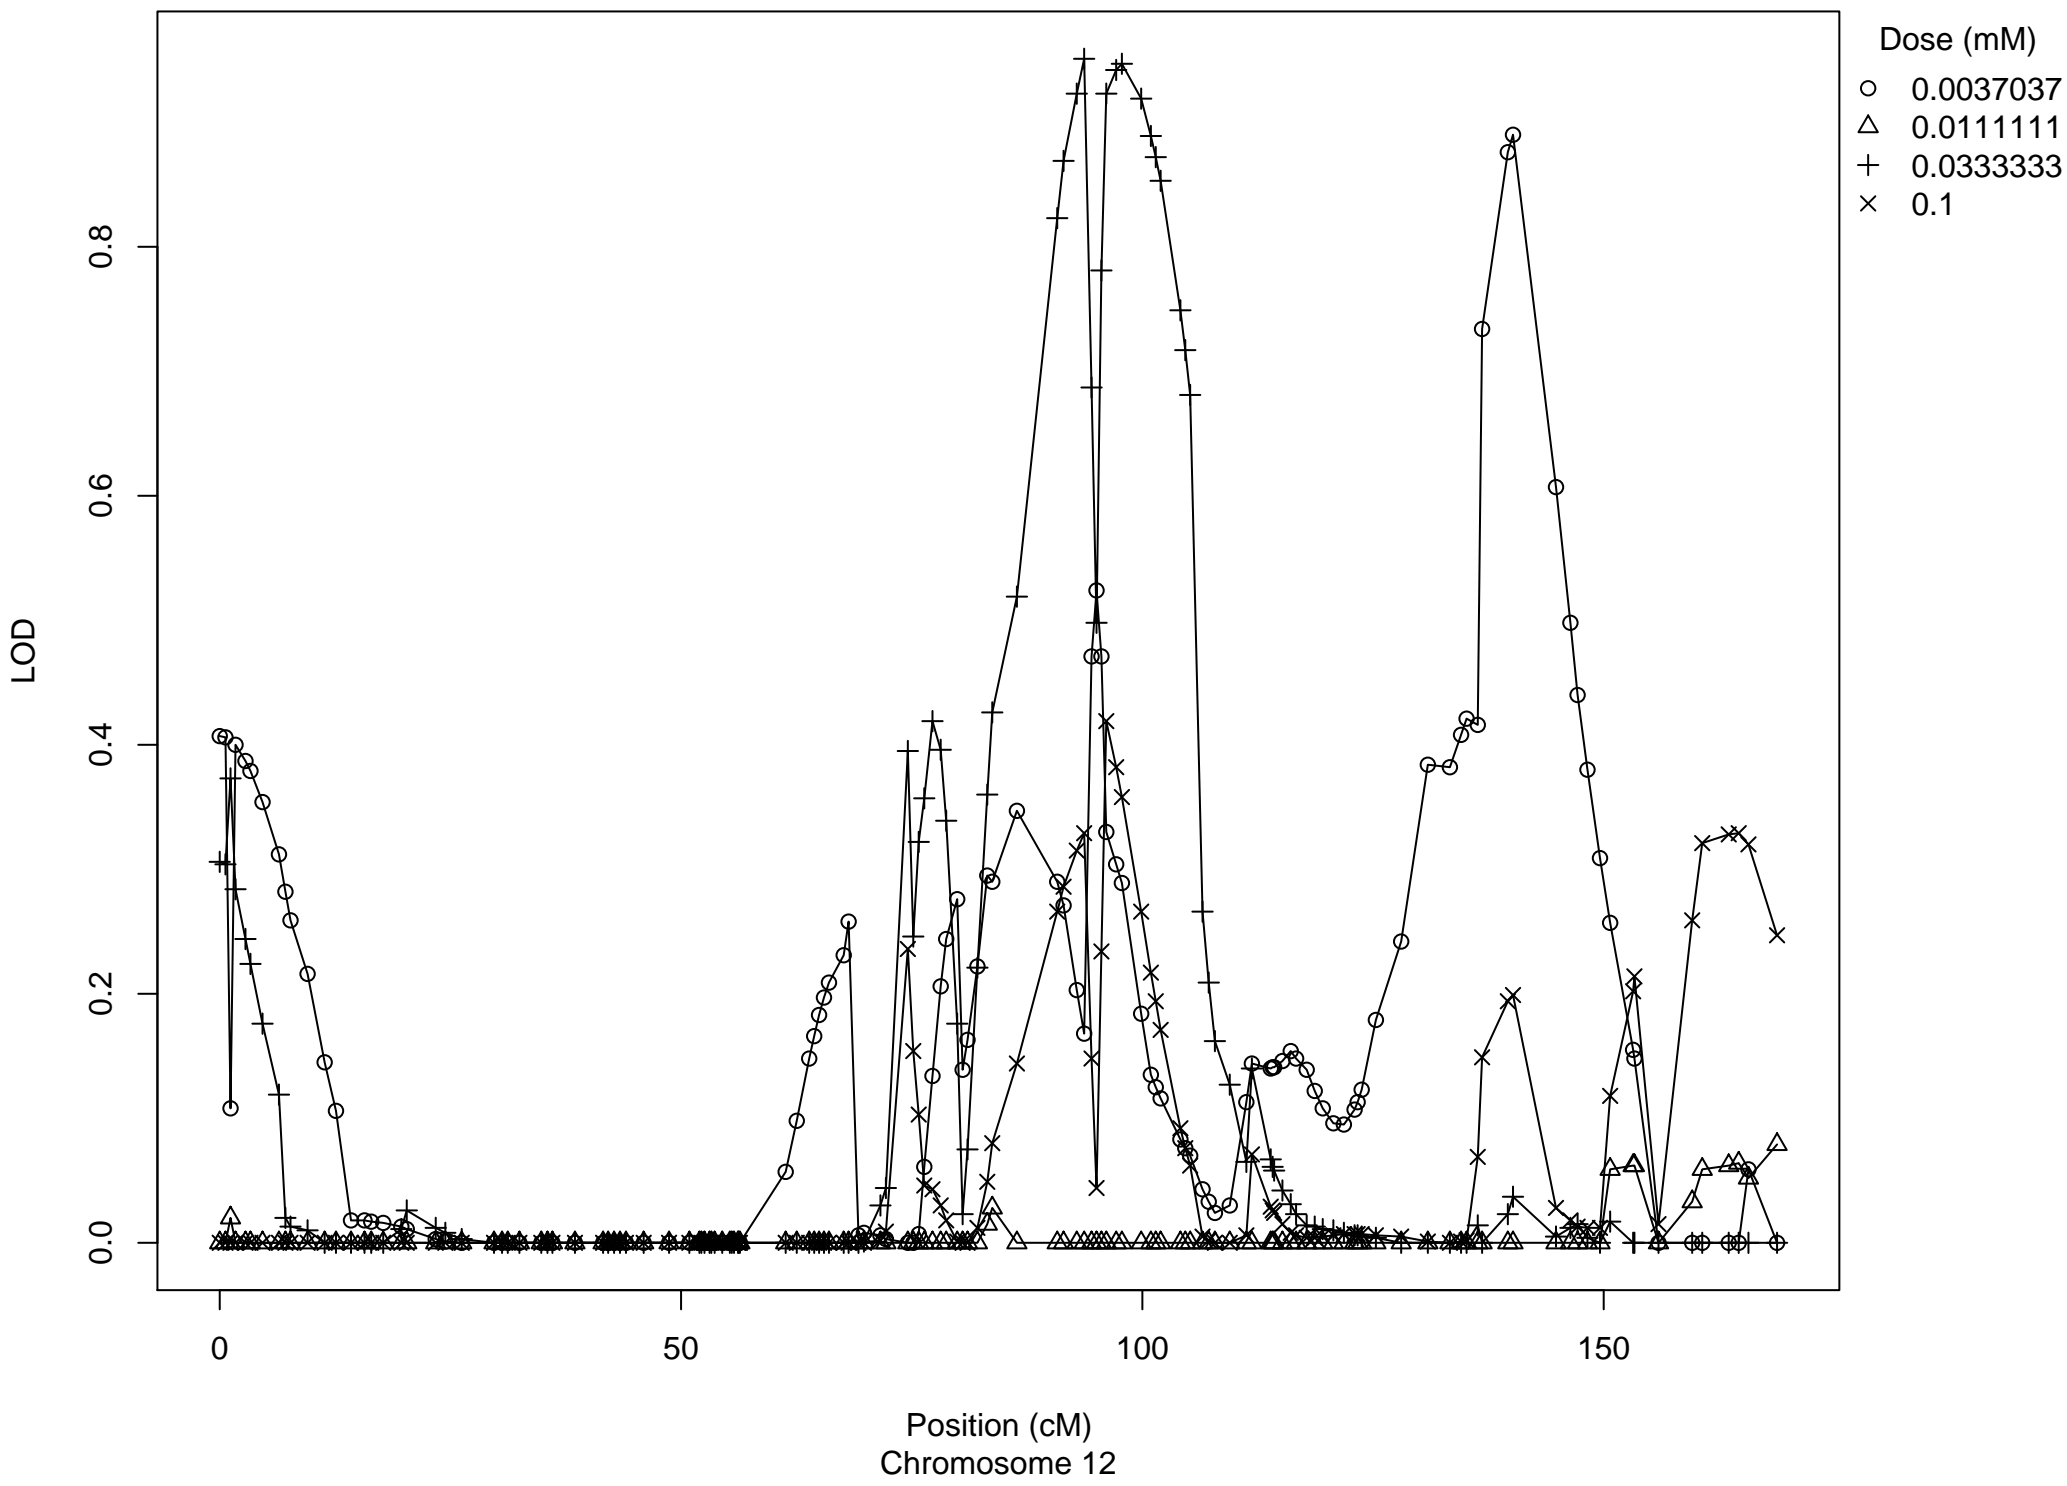

# Oxaliplatin (Oxal)

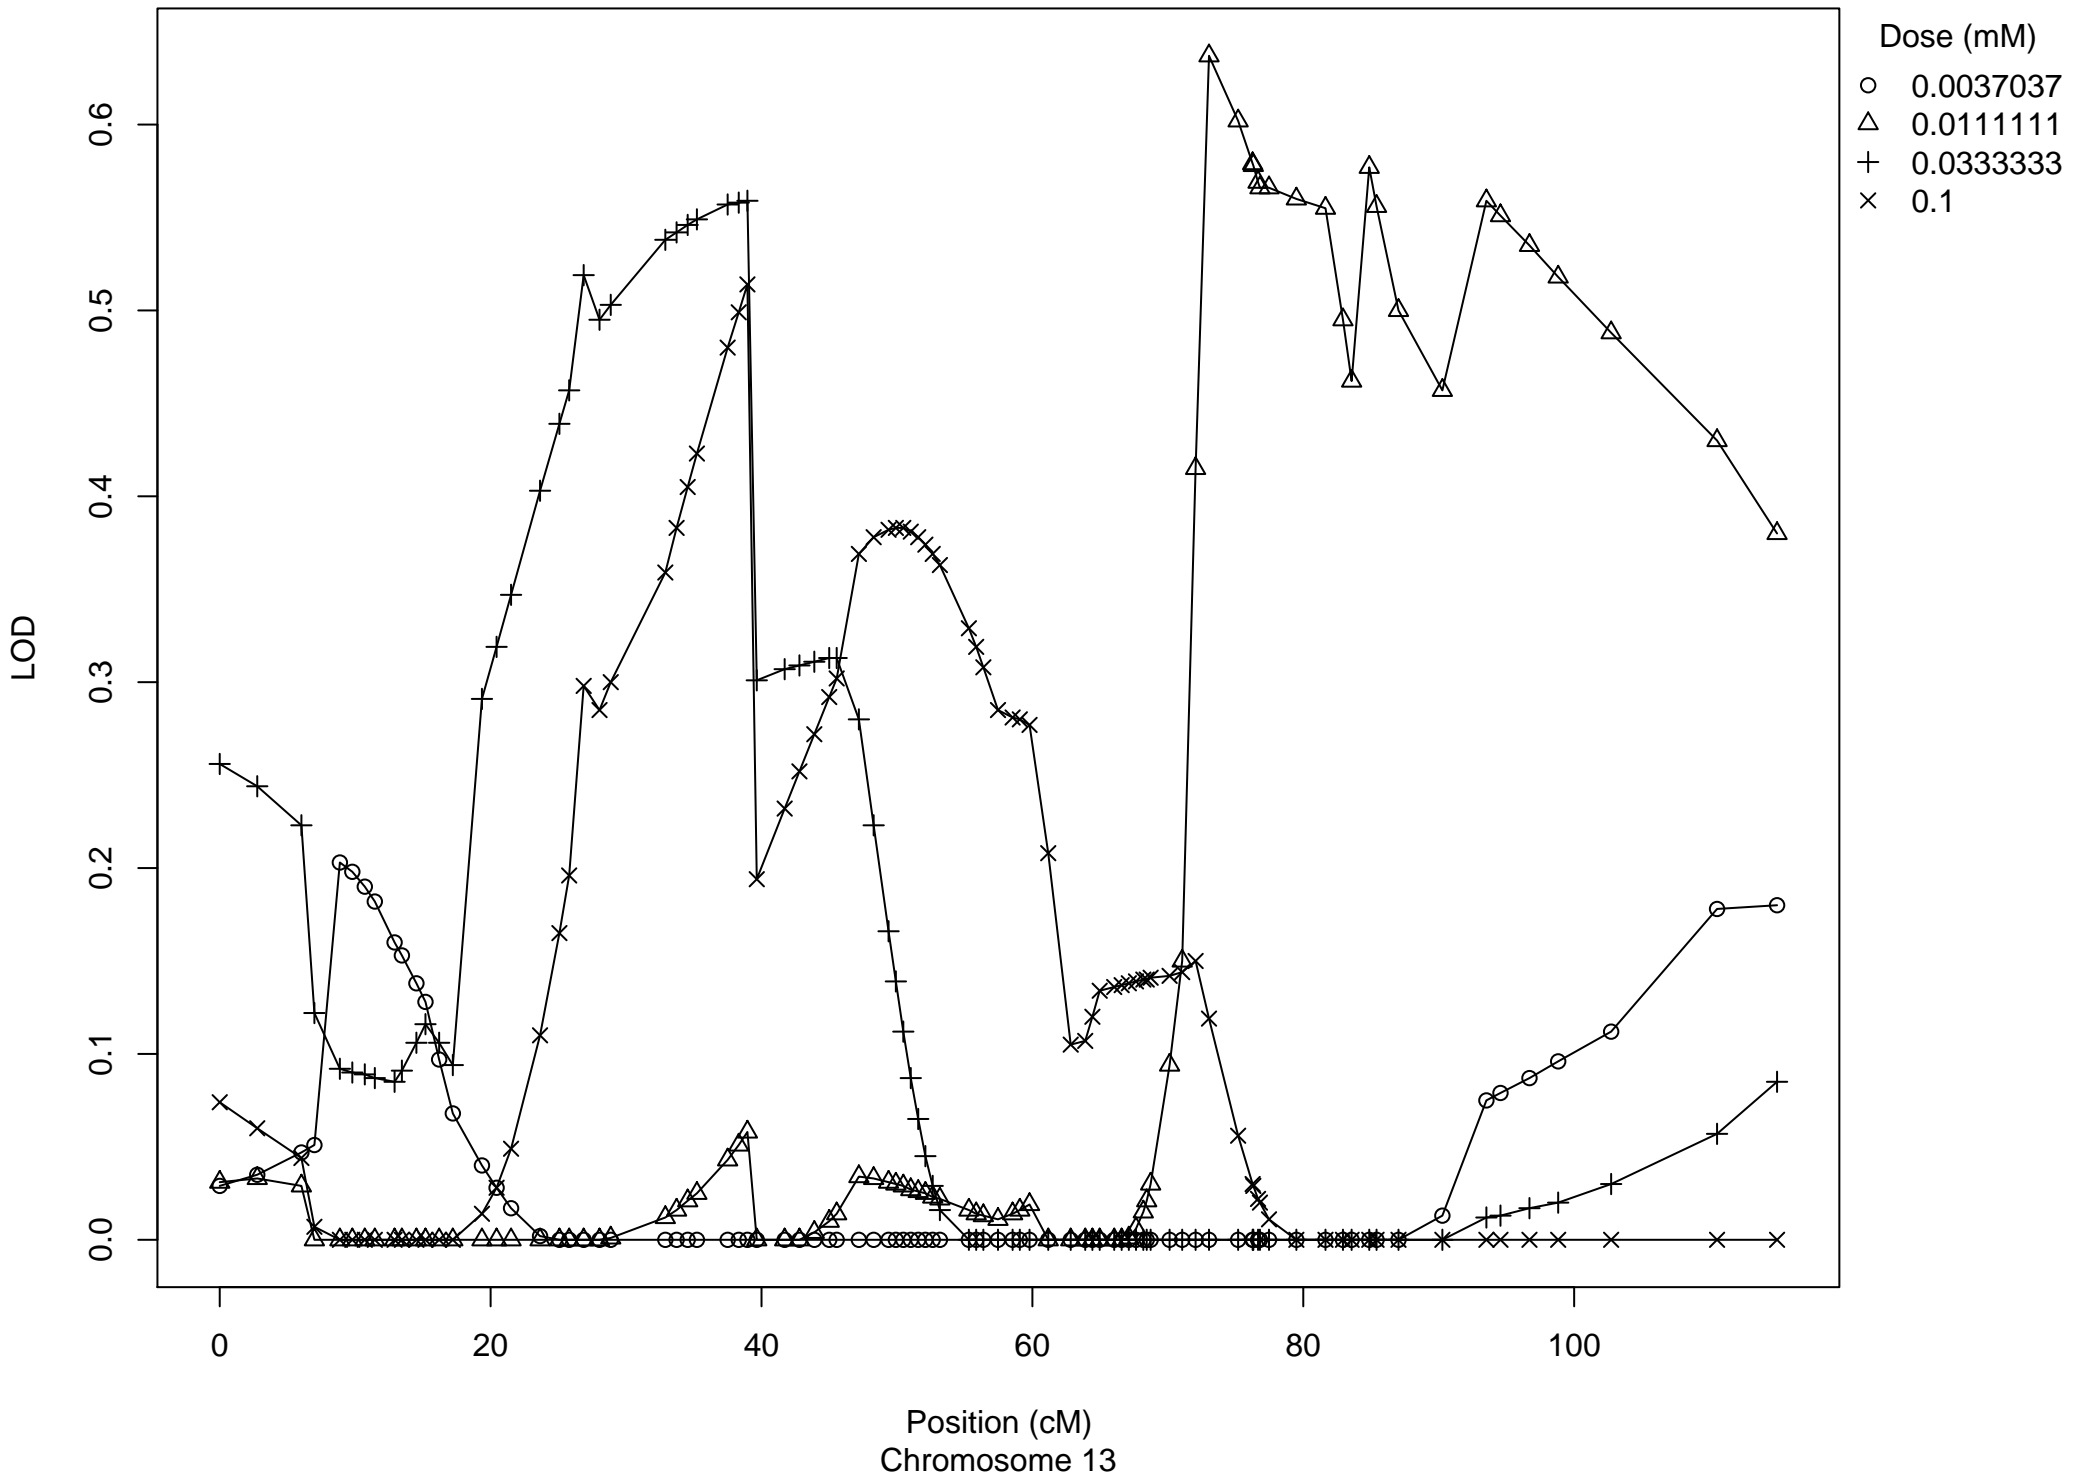

# Oxaliplatin (Oxal)

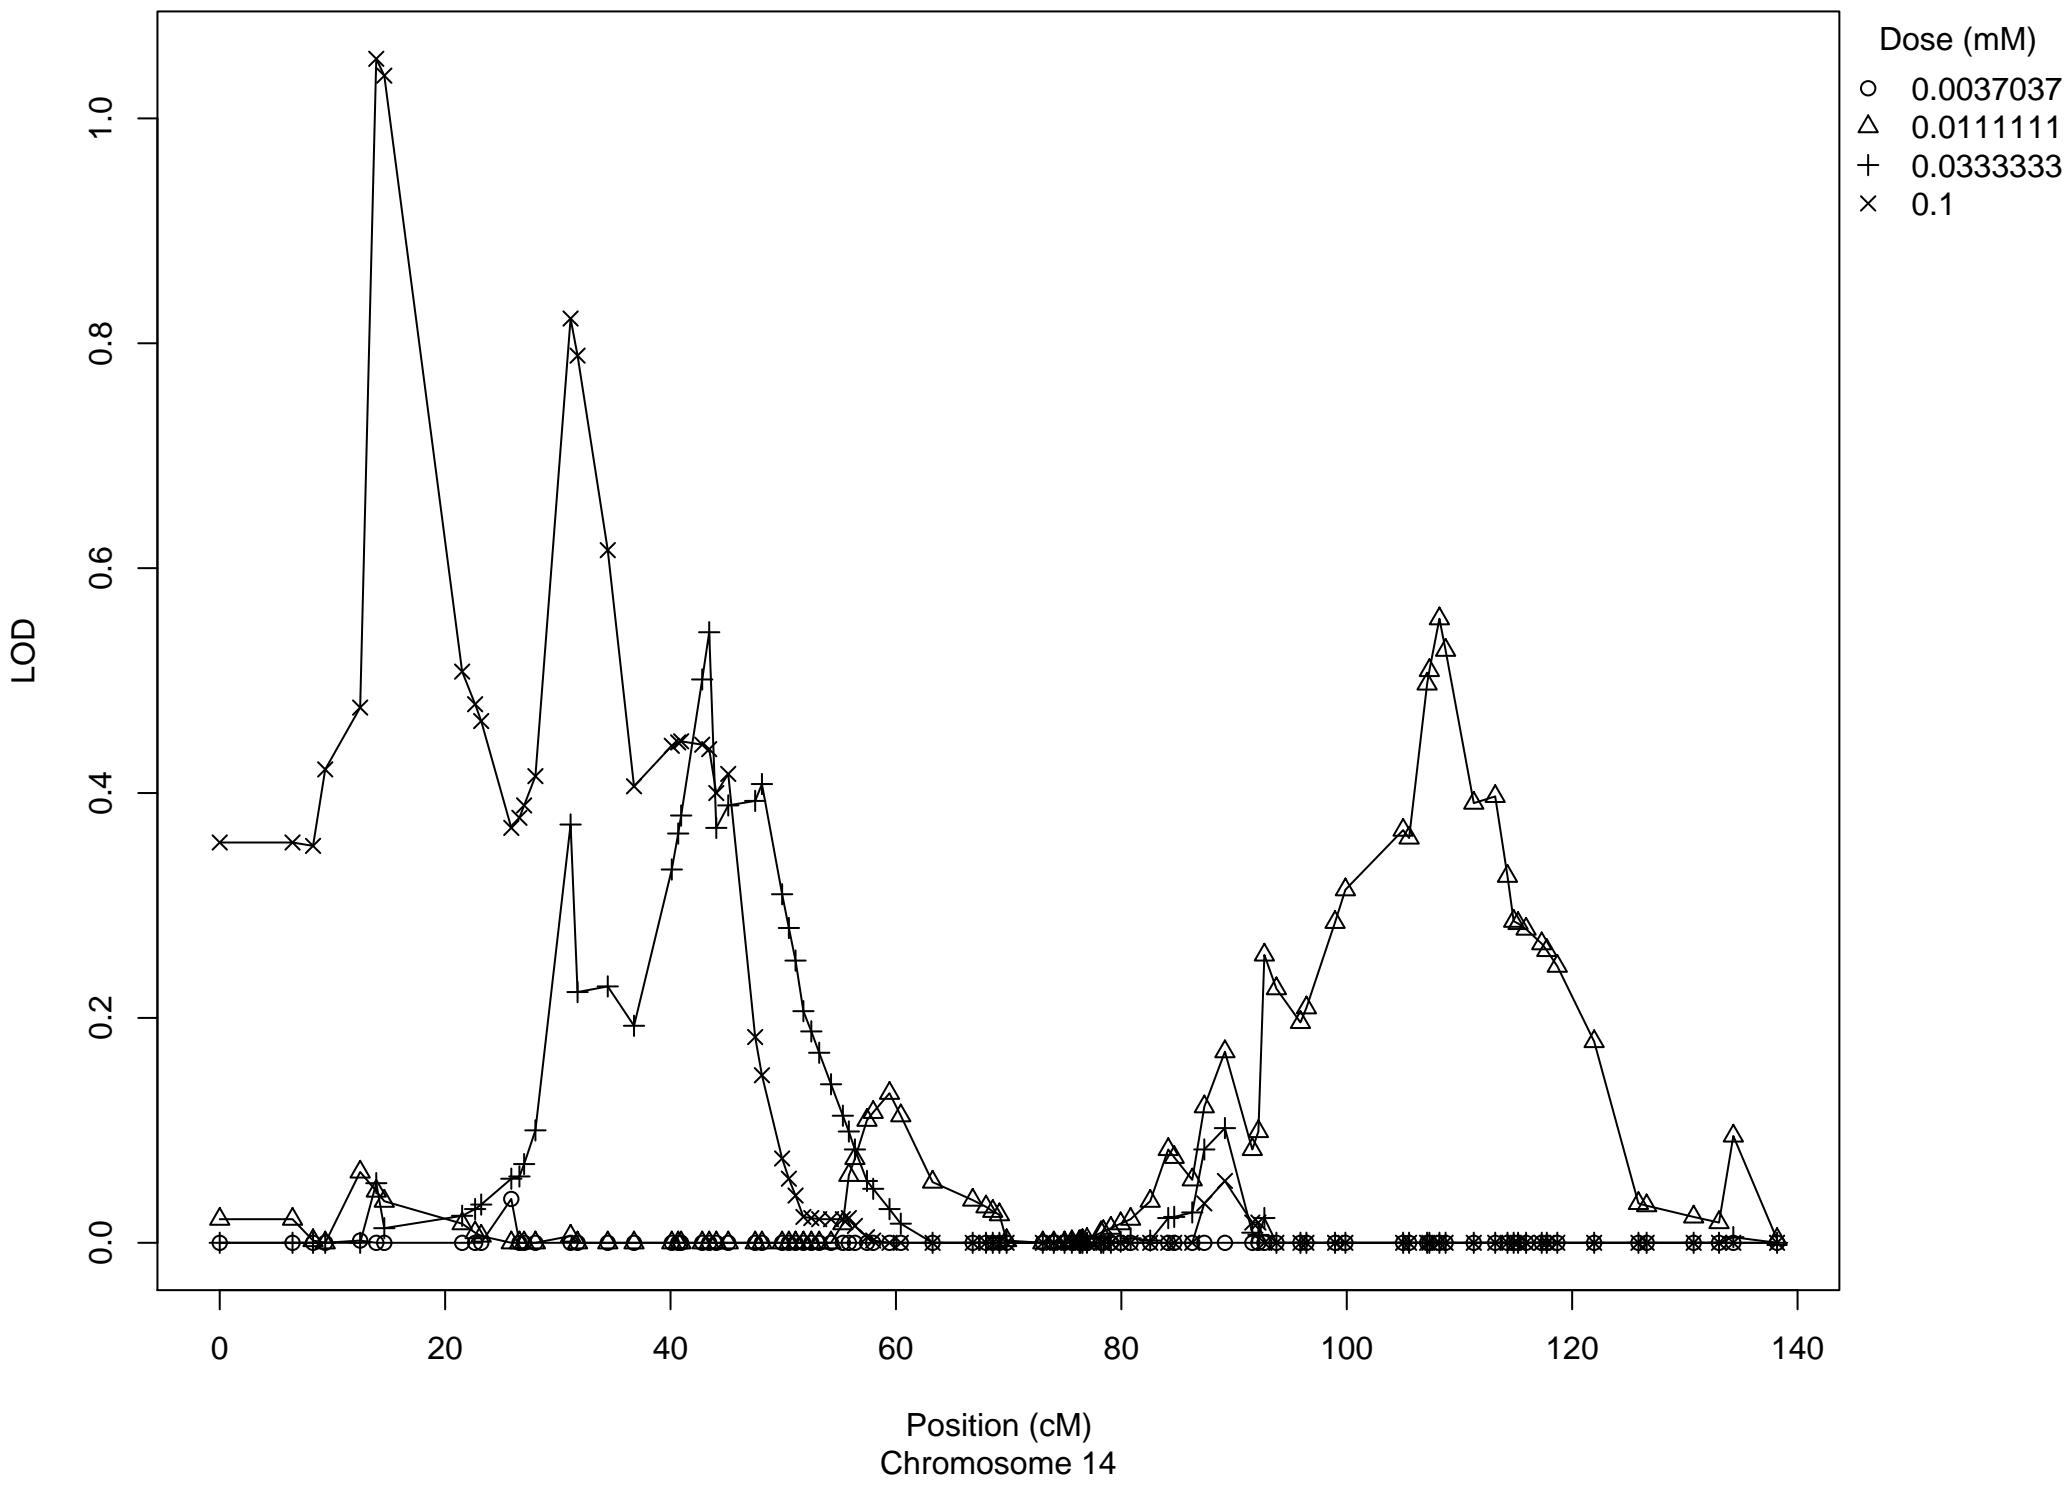

# Oxaliplatin (Oxal)

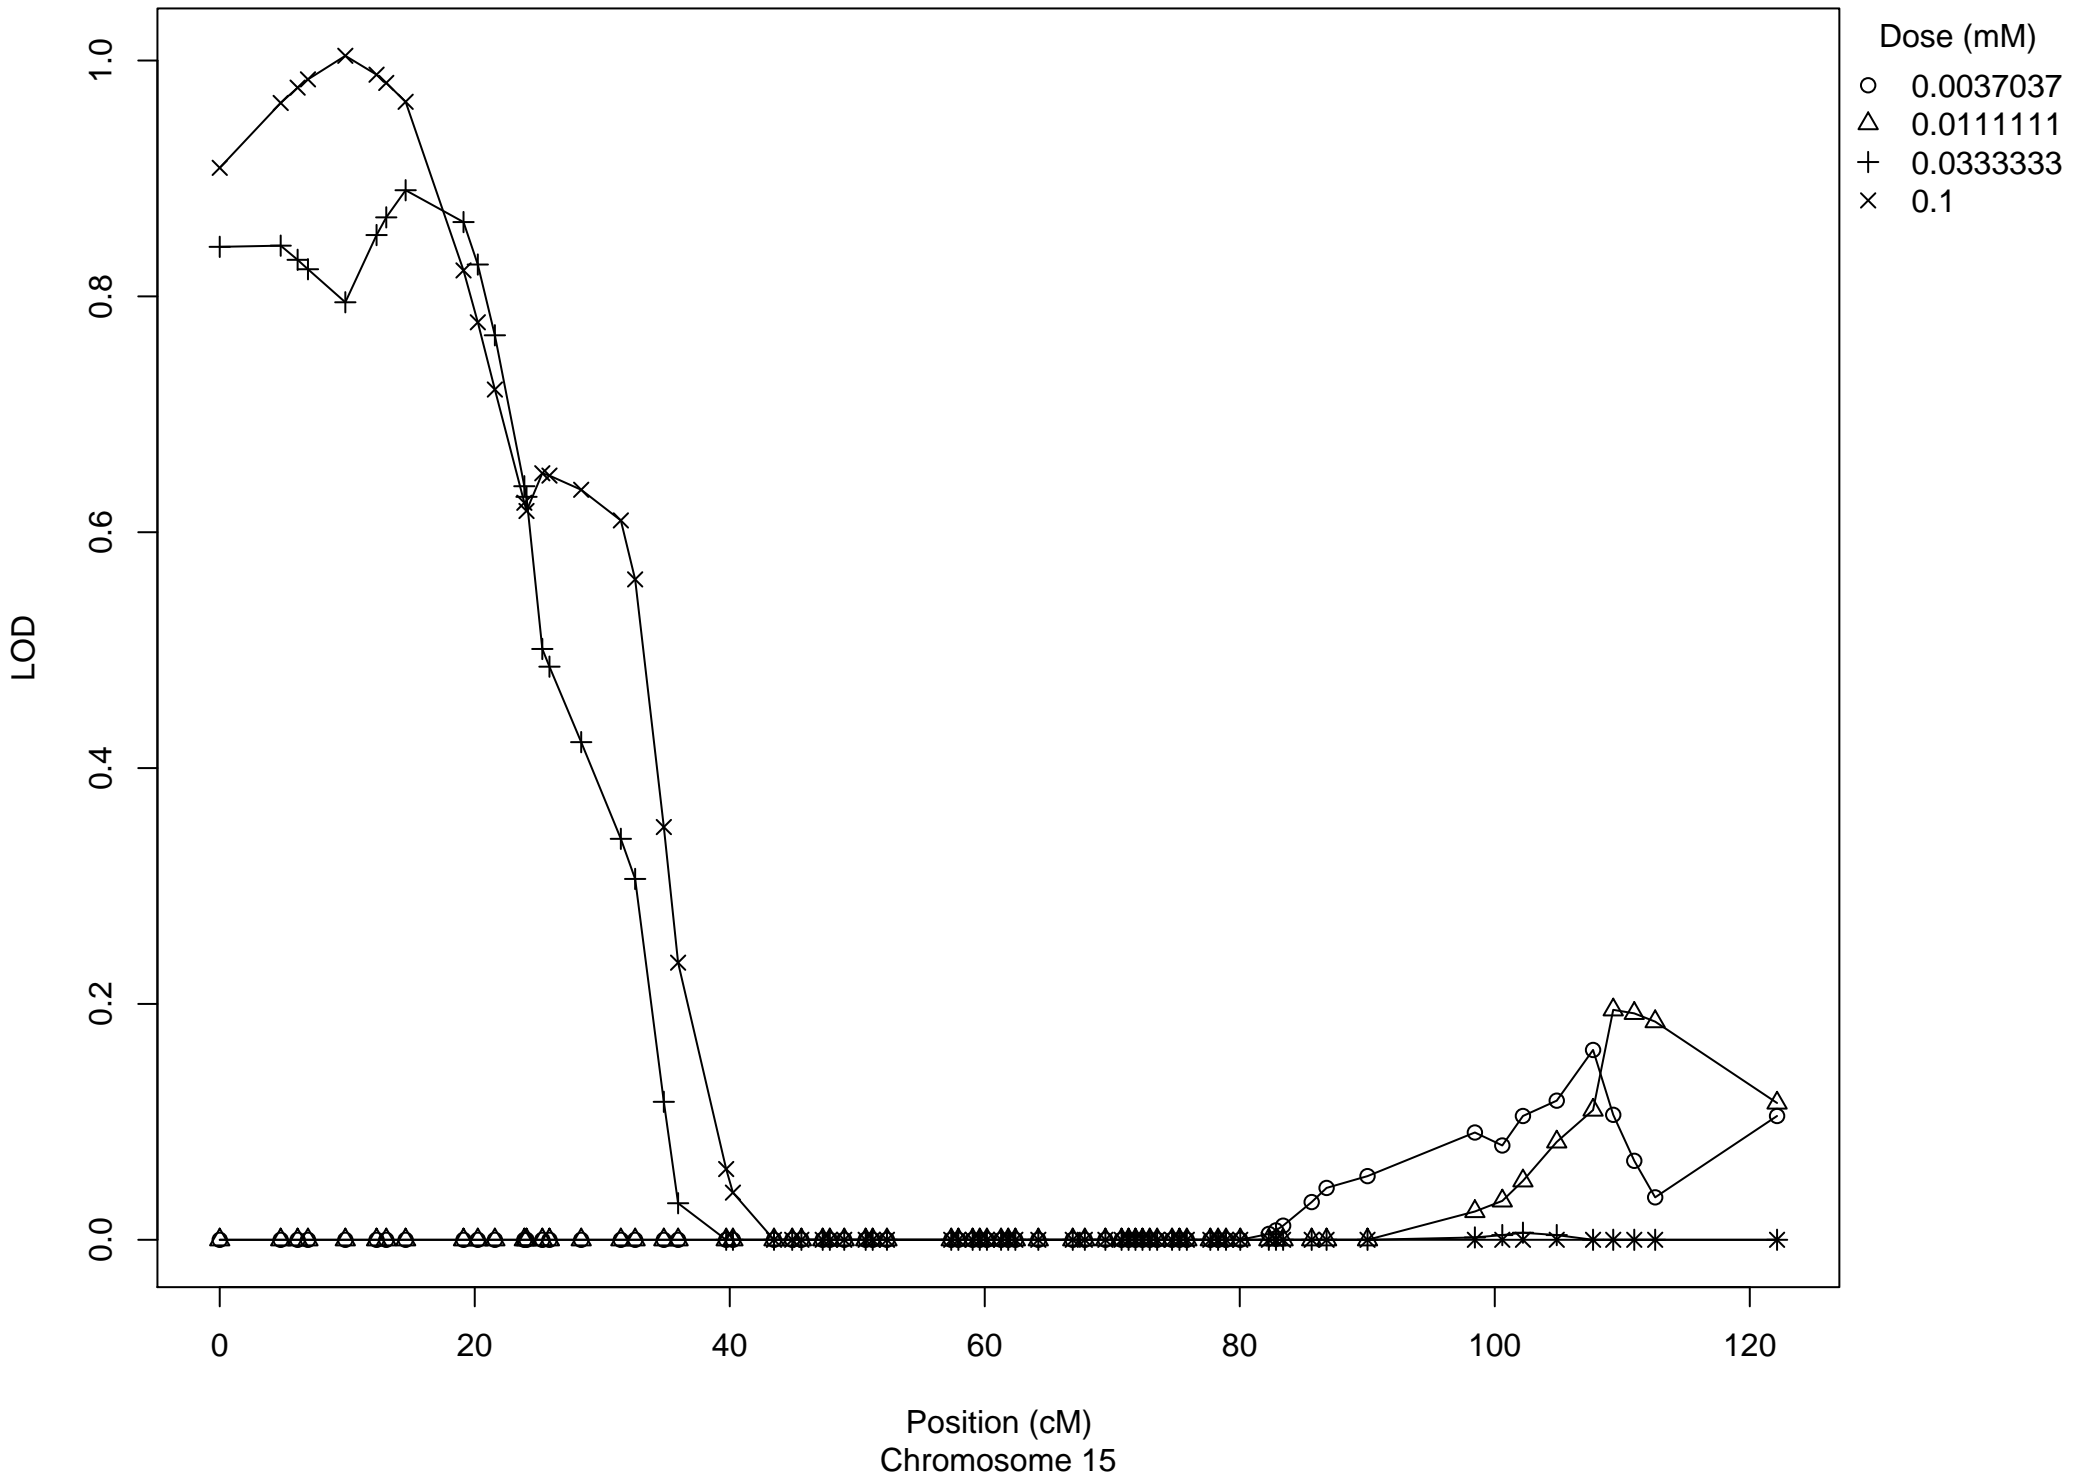

# Oxaliplatin (Oxal)

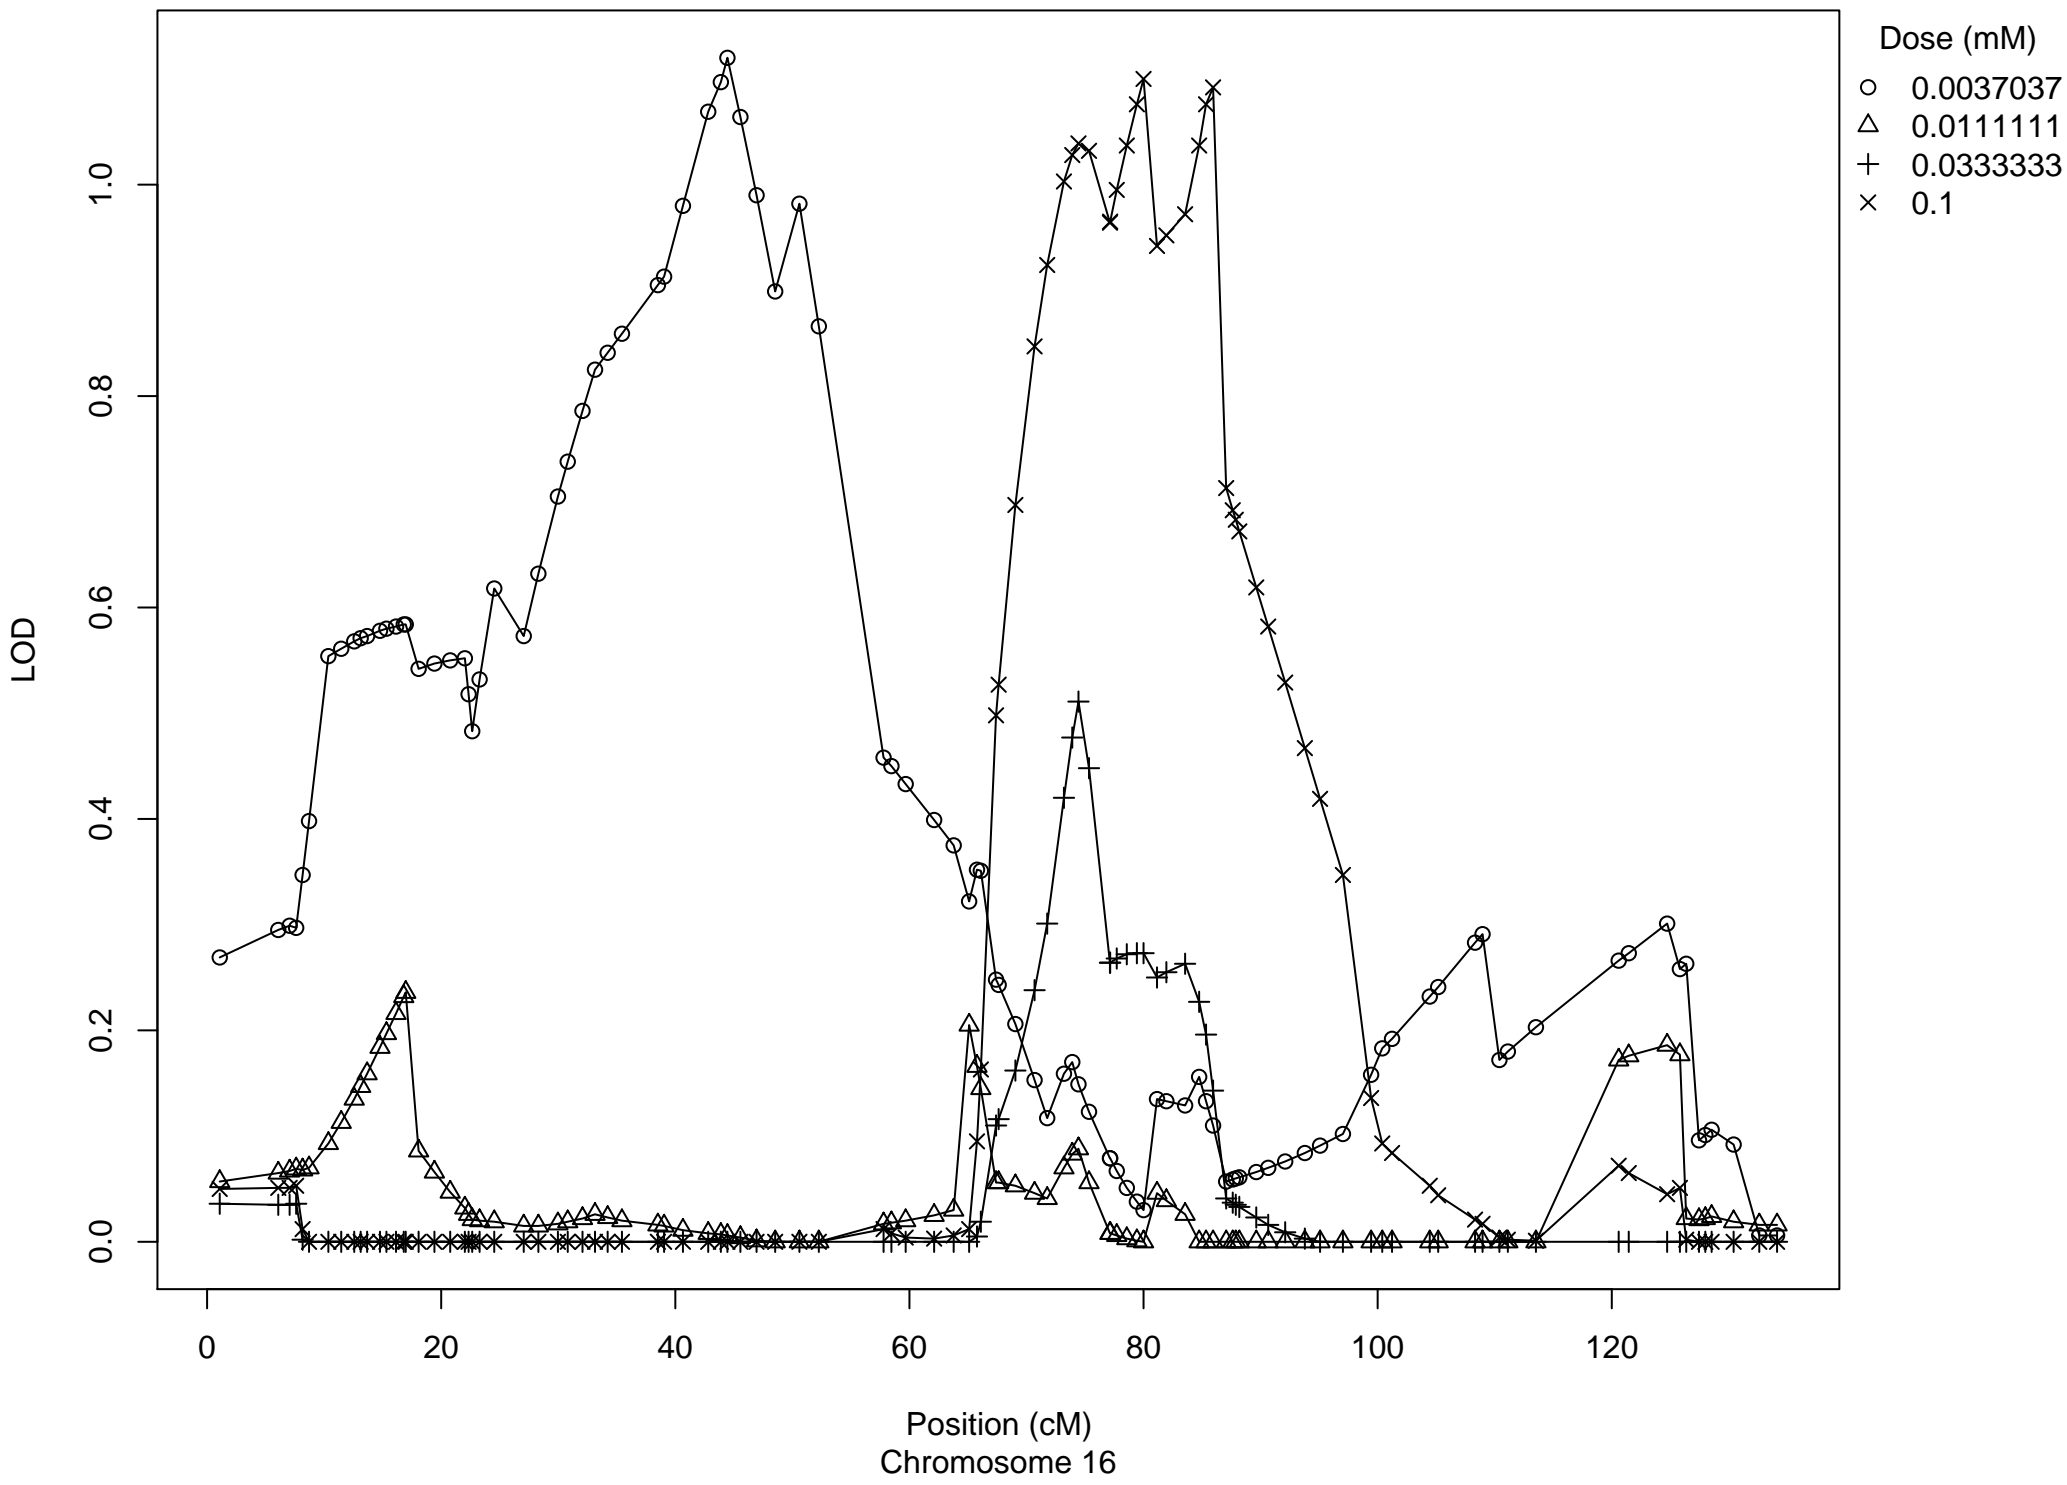



# Oxaliplatin (Oxal)

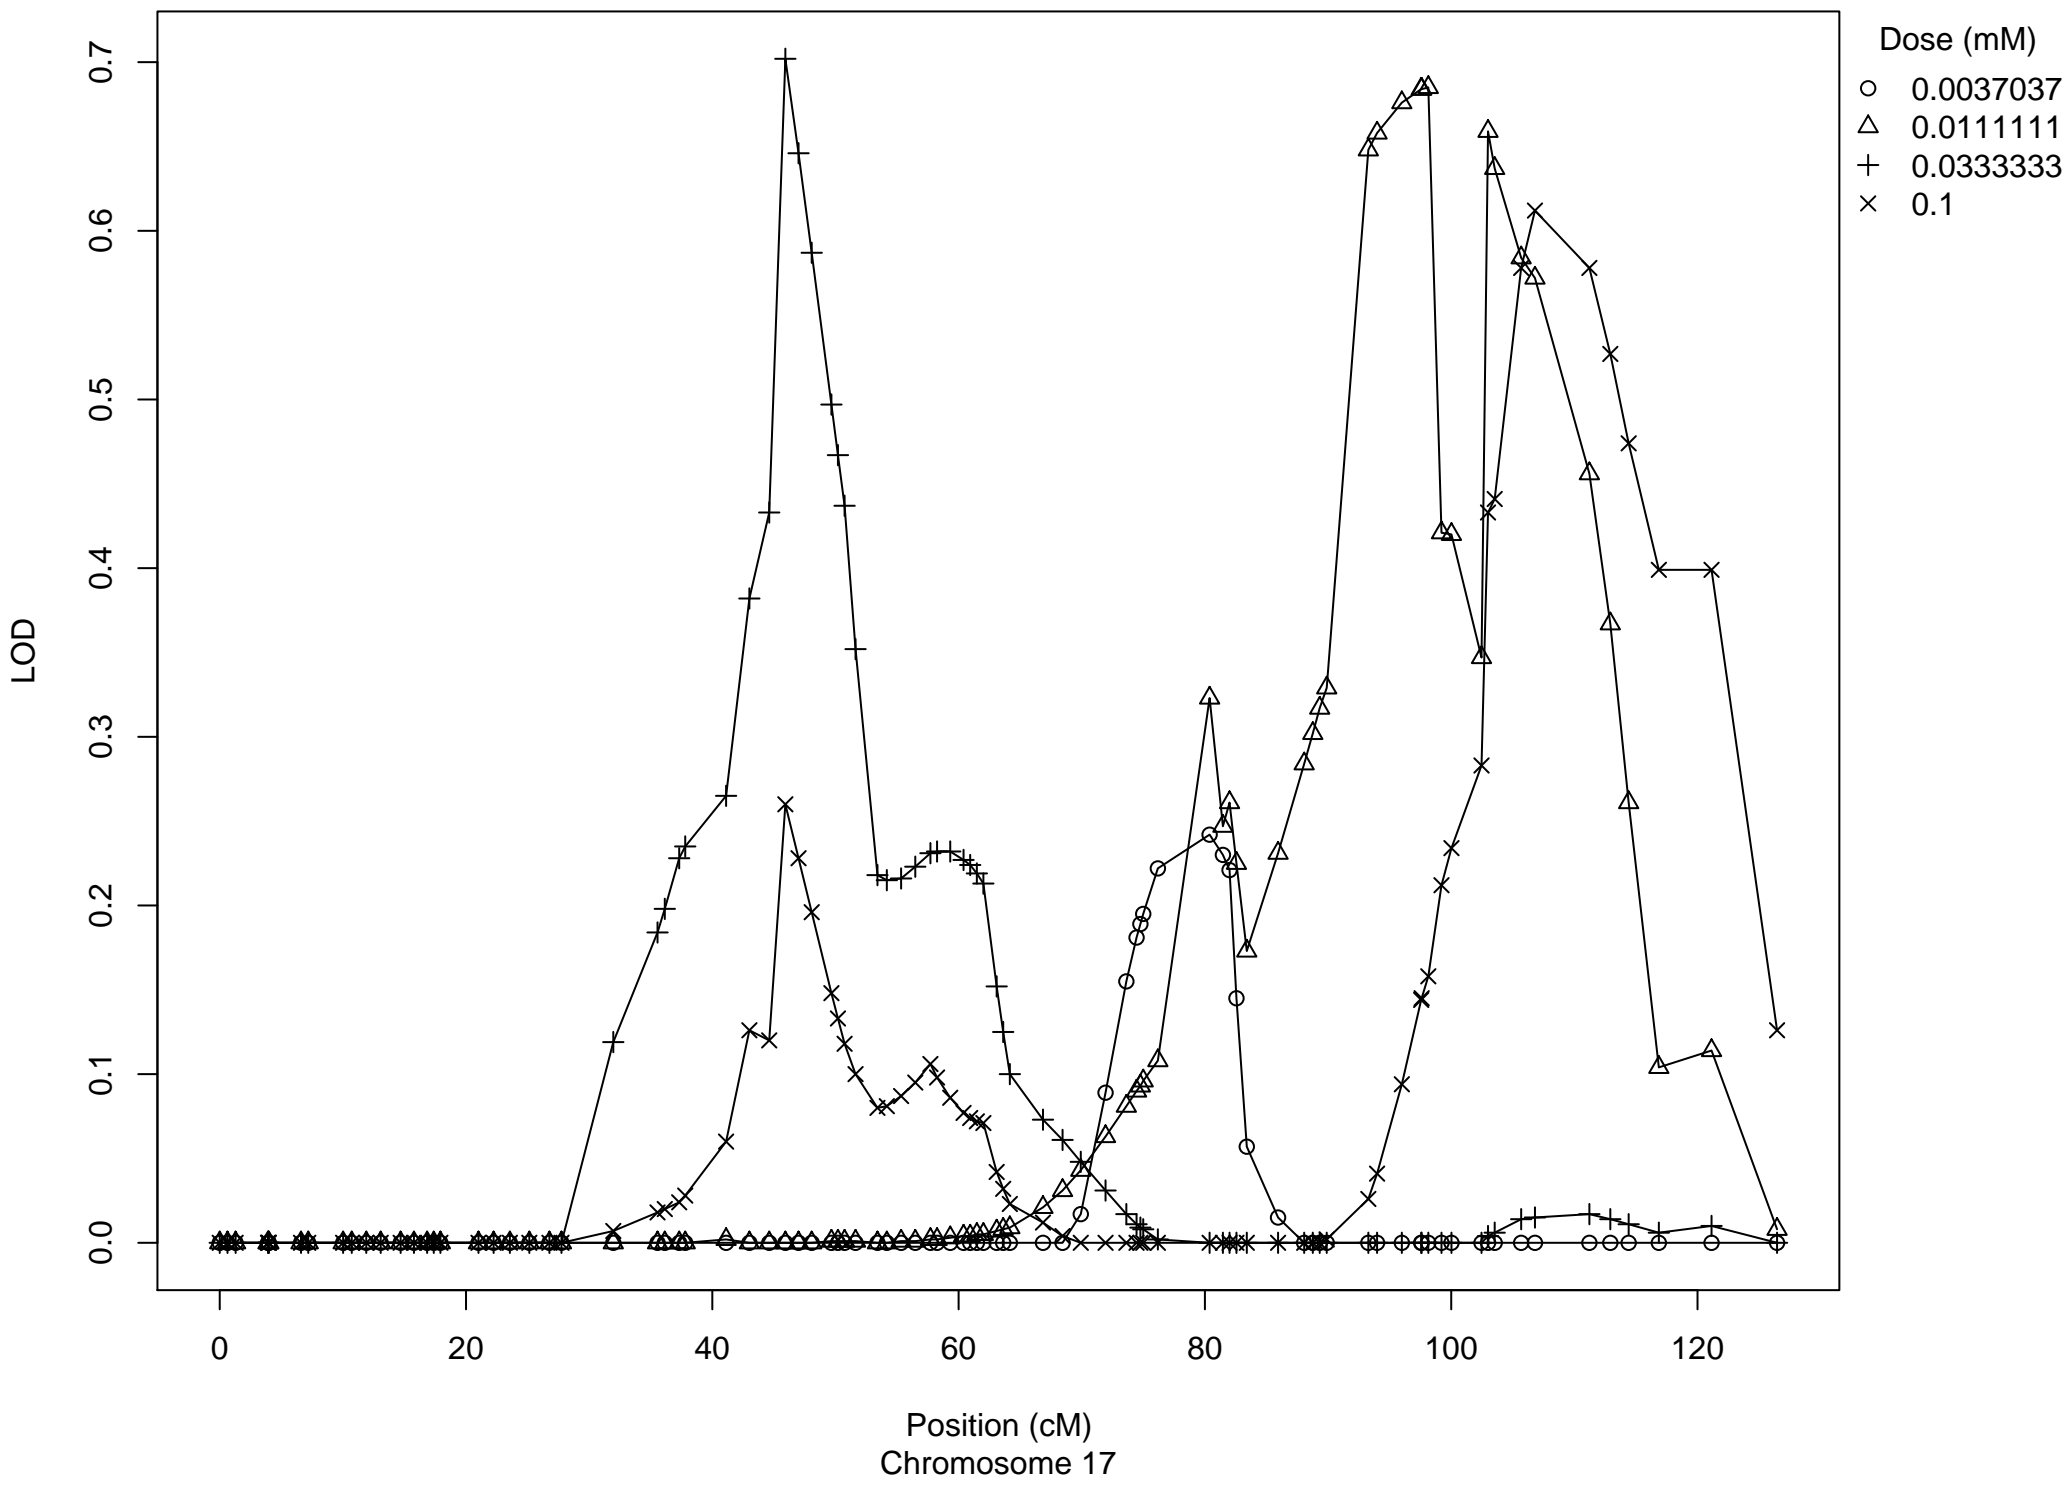

# Oxaliplatin (Oxal)

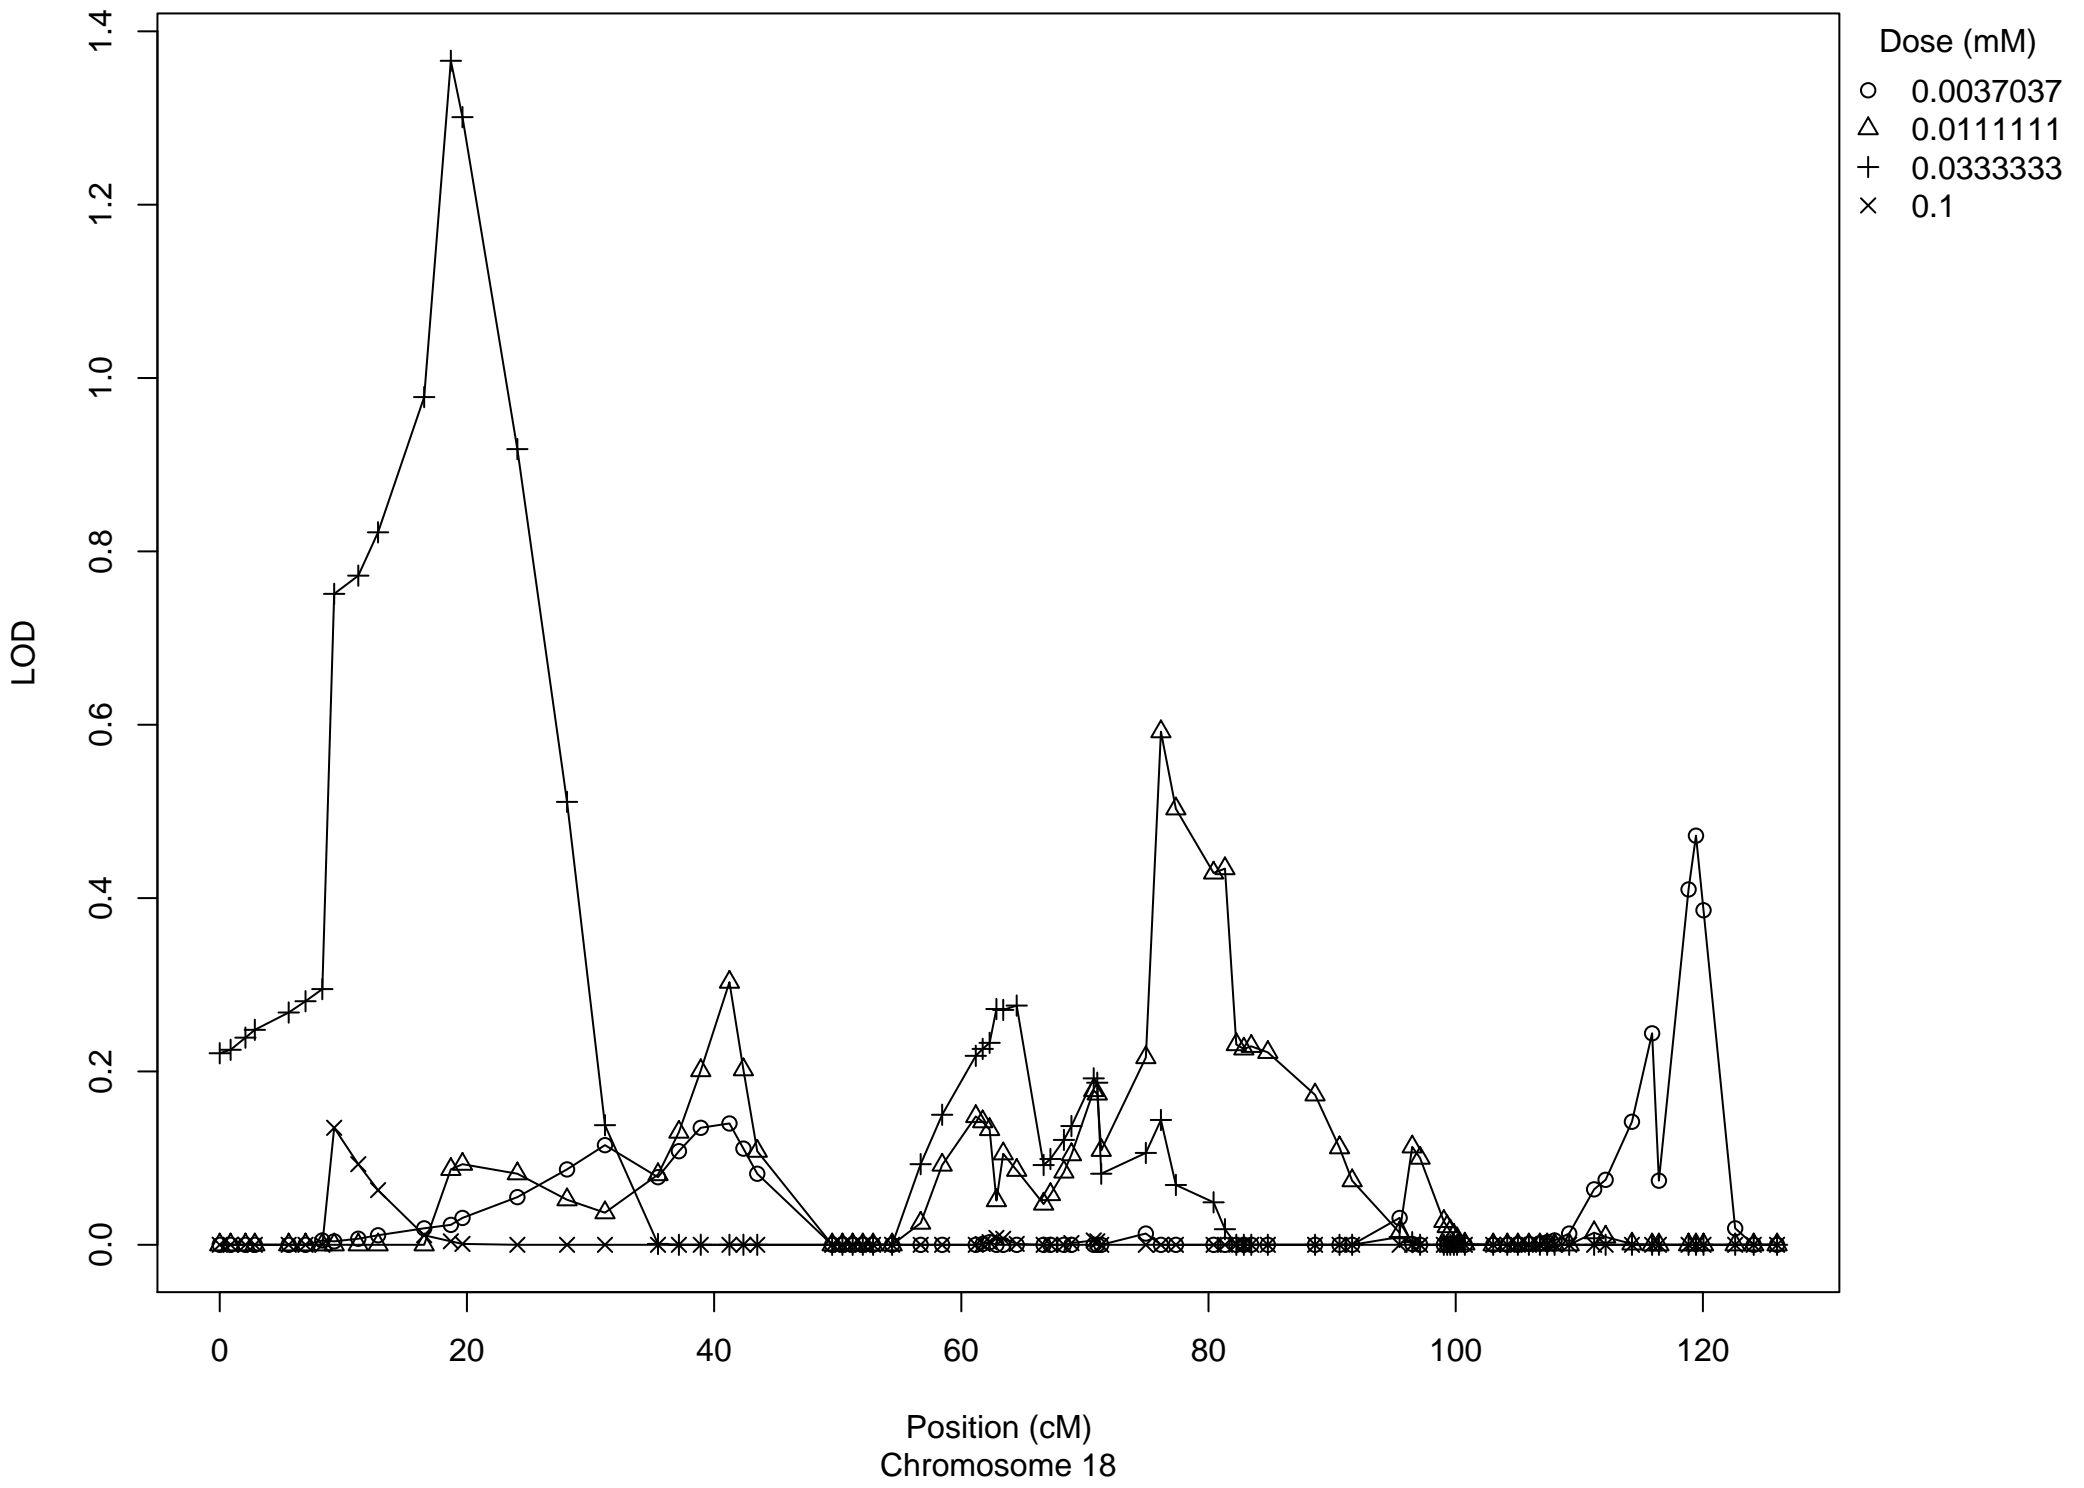

# Oxaliplatin (Oxal)

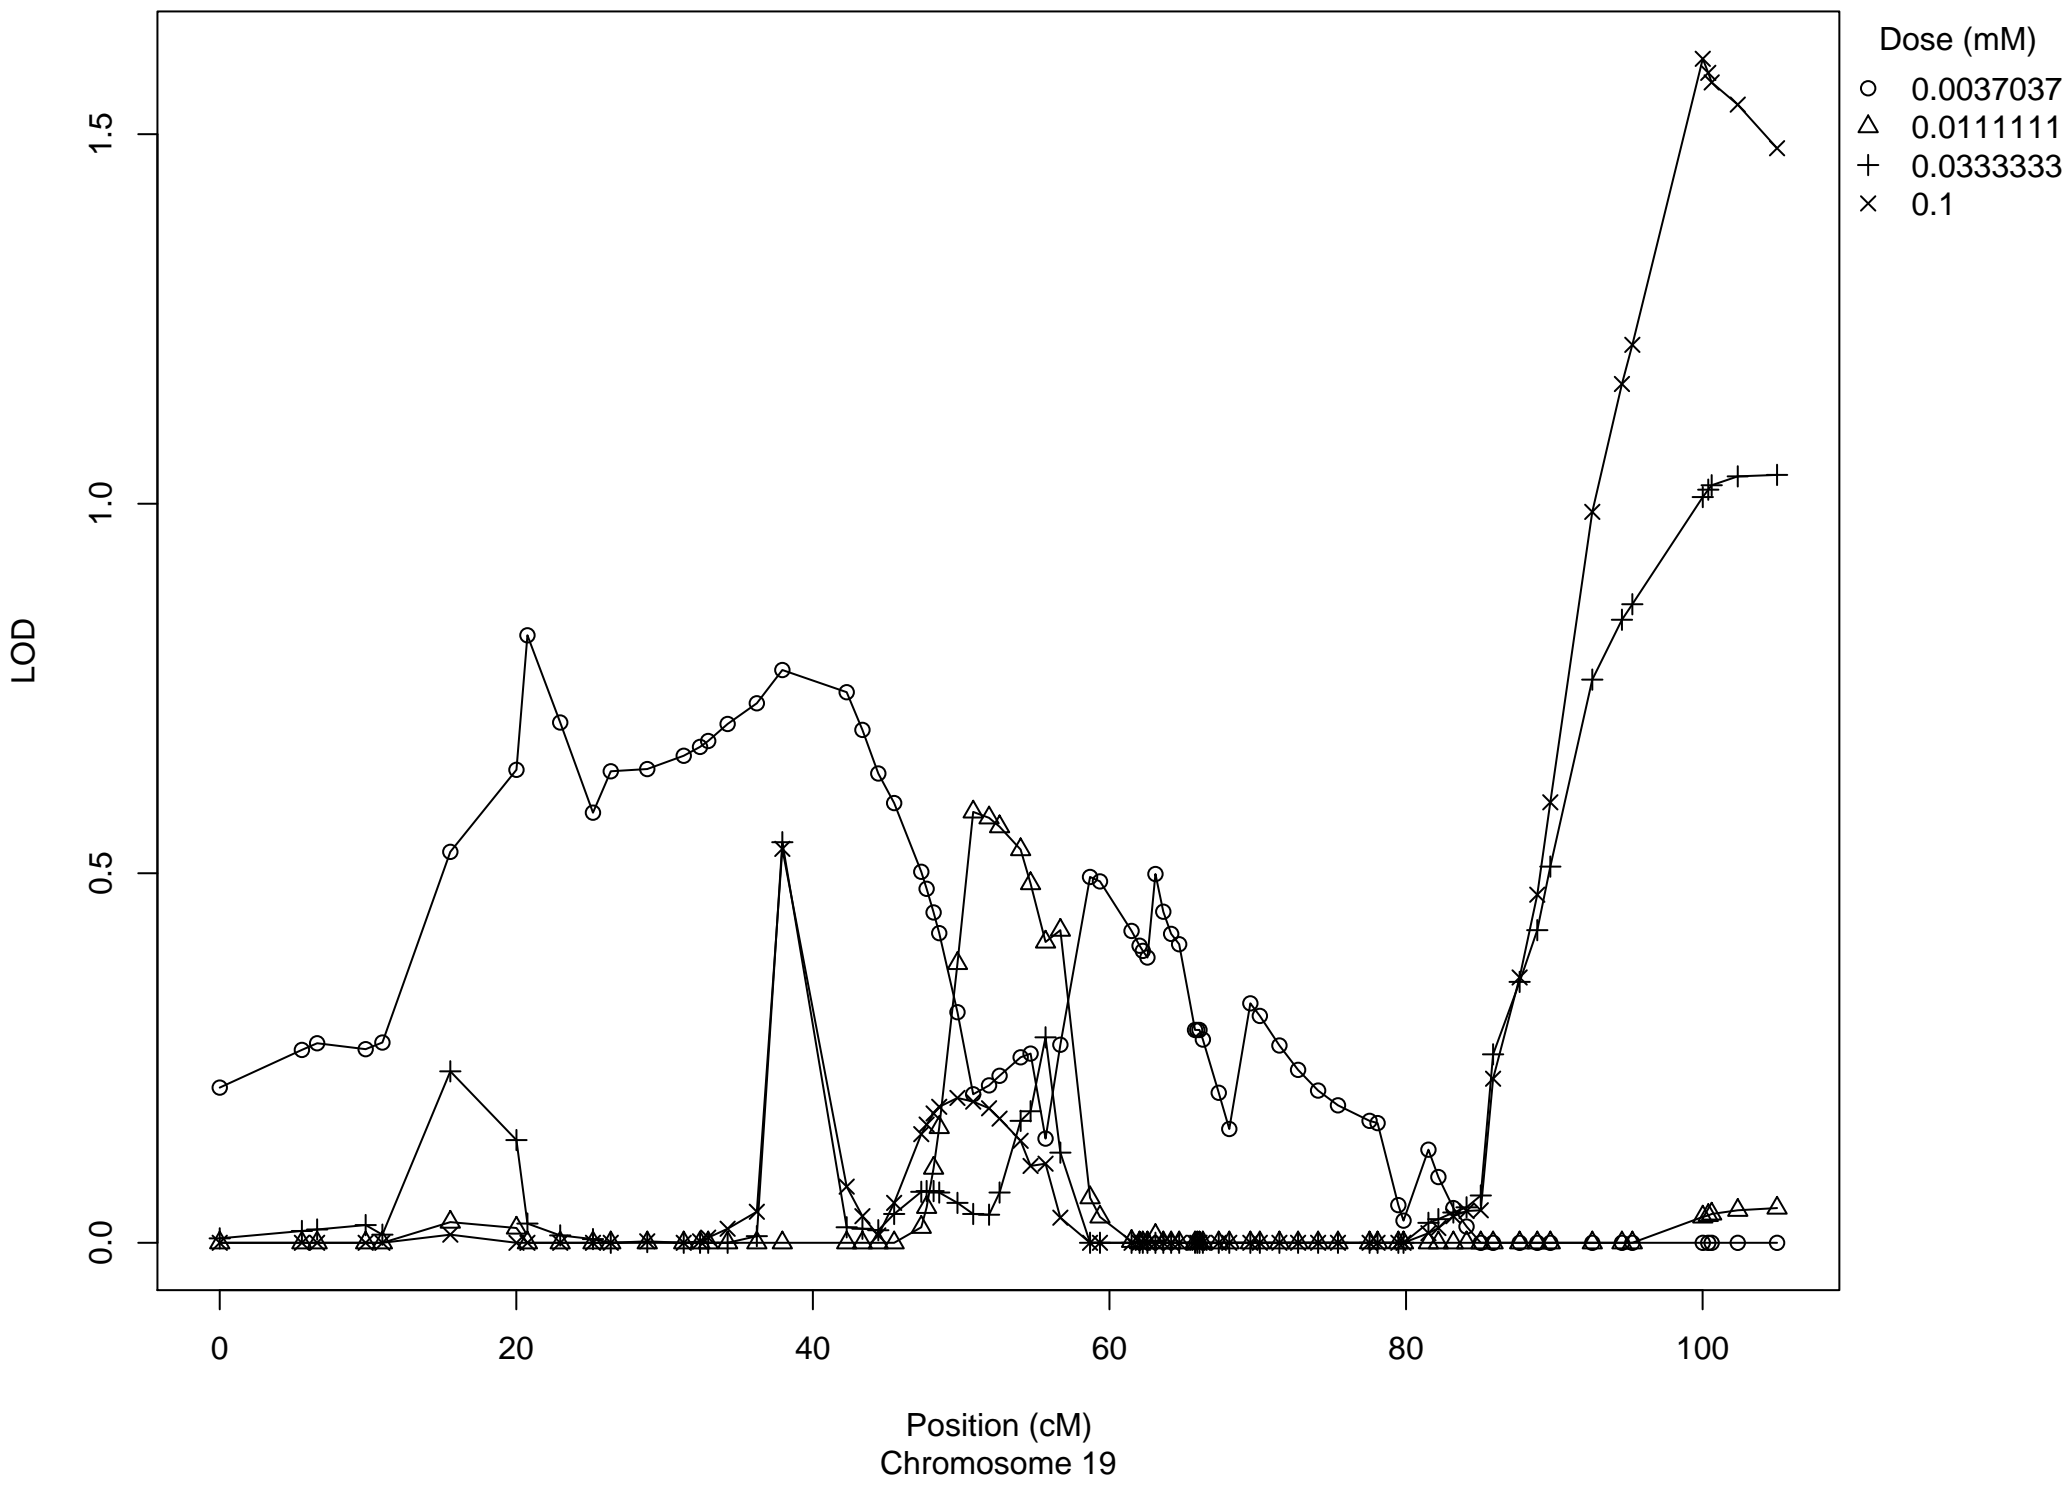

# Oxaliplatin (Oxal)

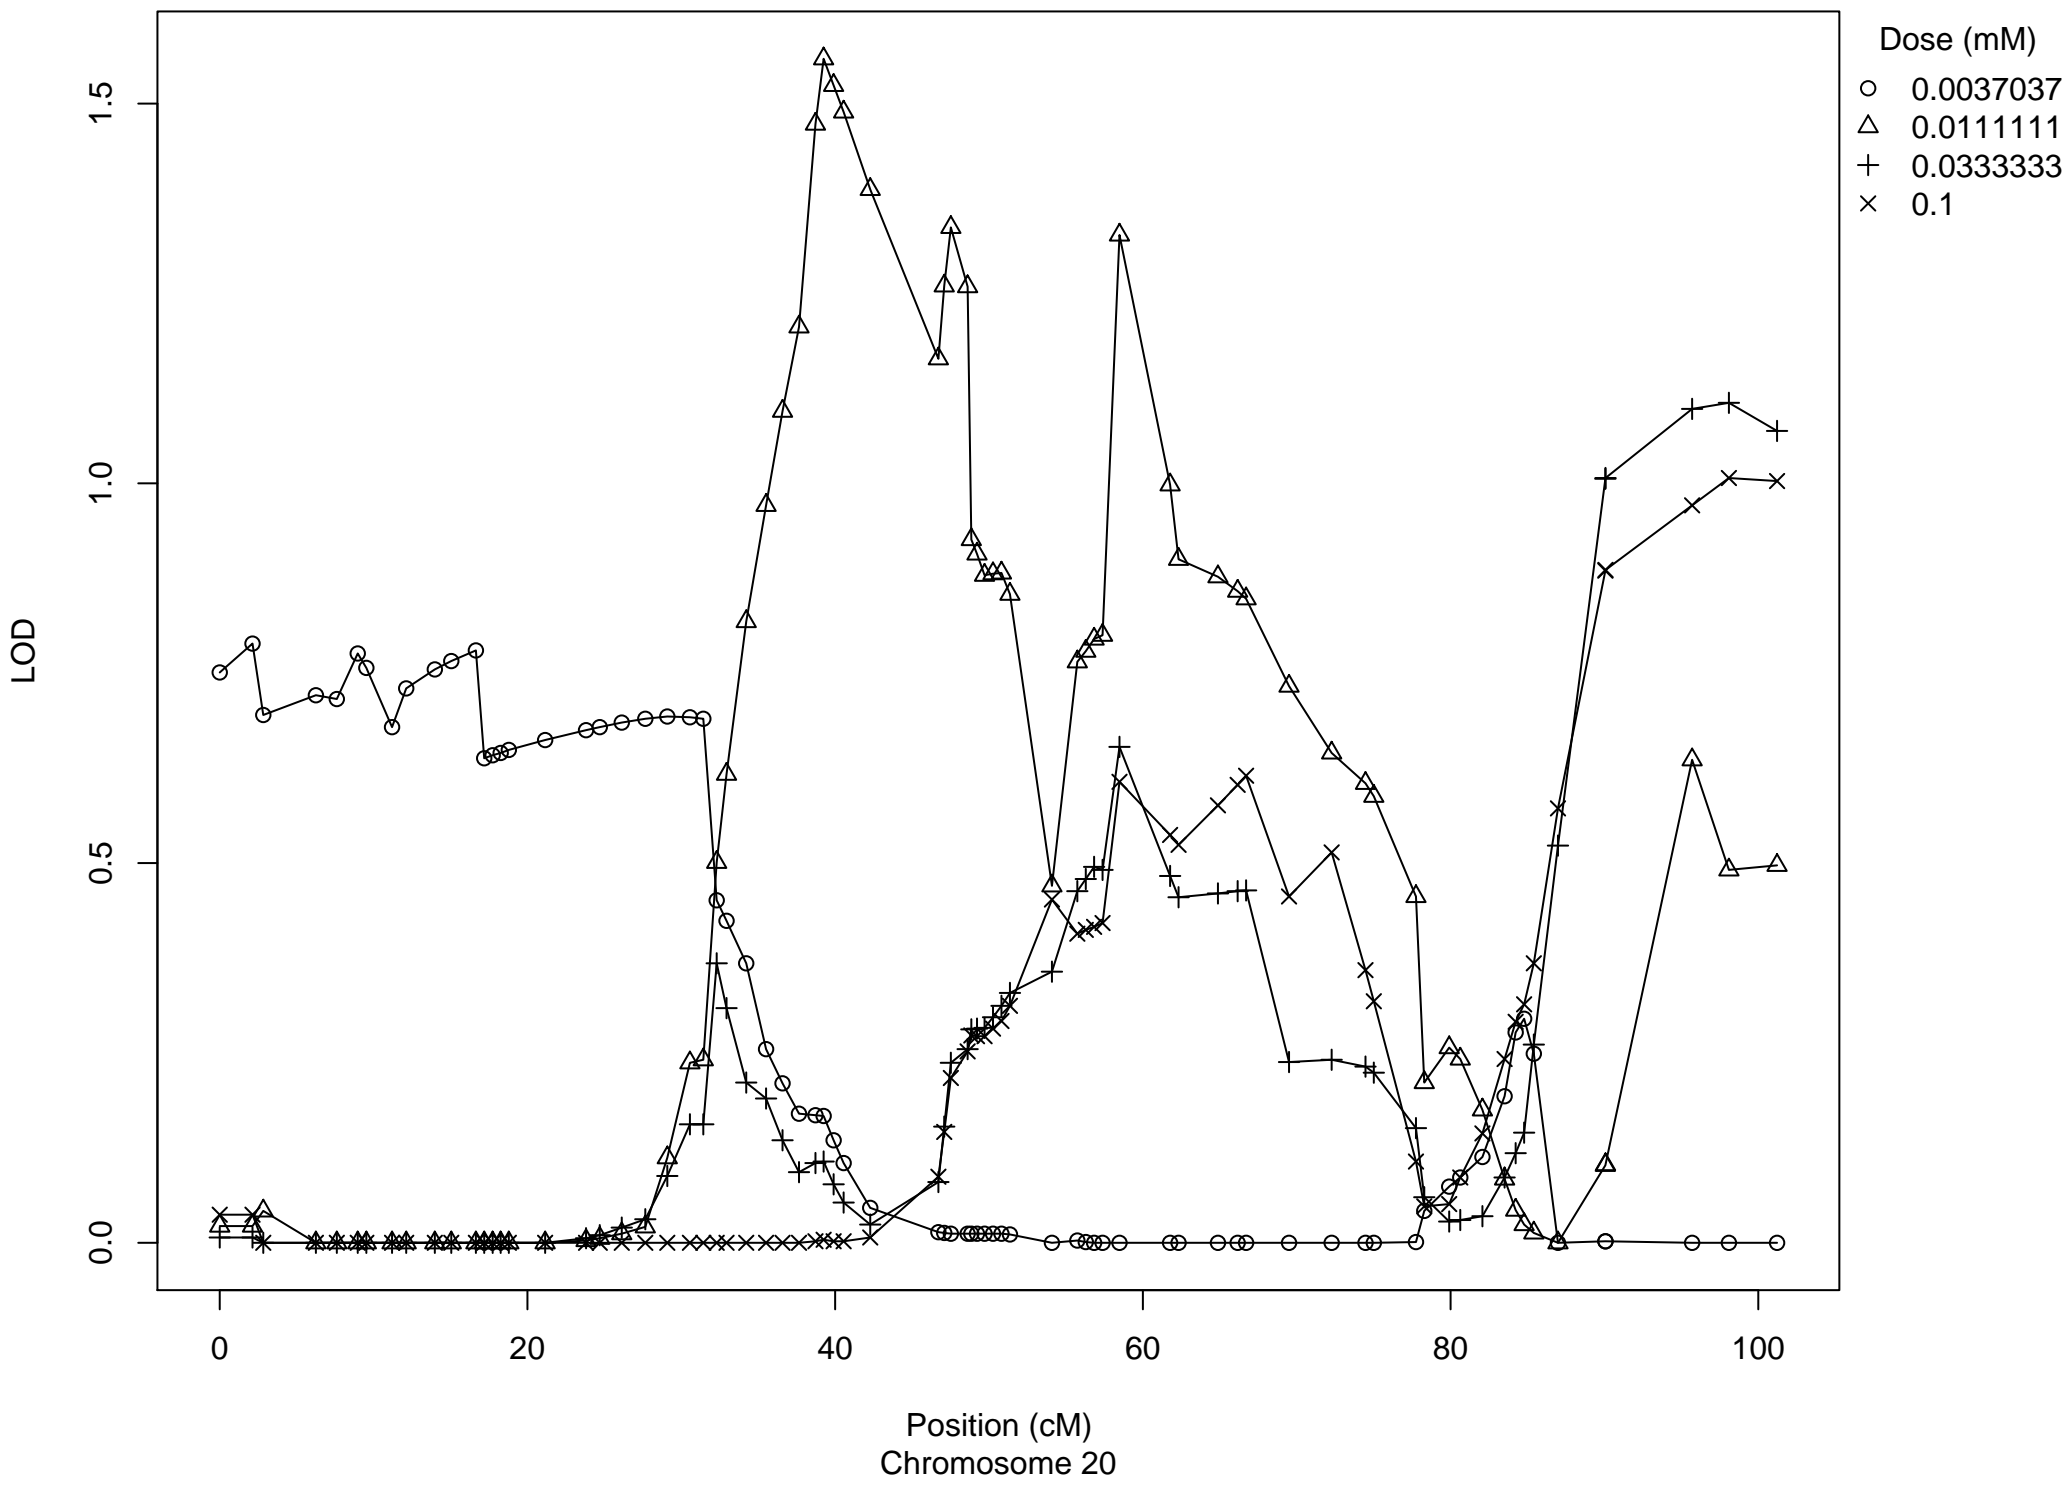

# Oxaliplatin (Oxal)

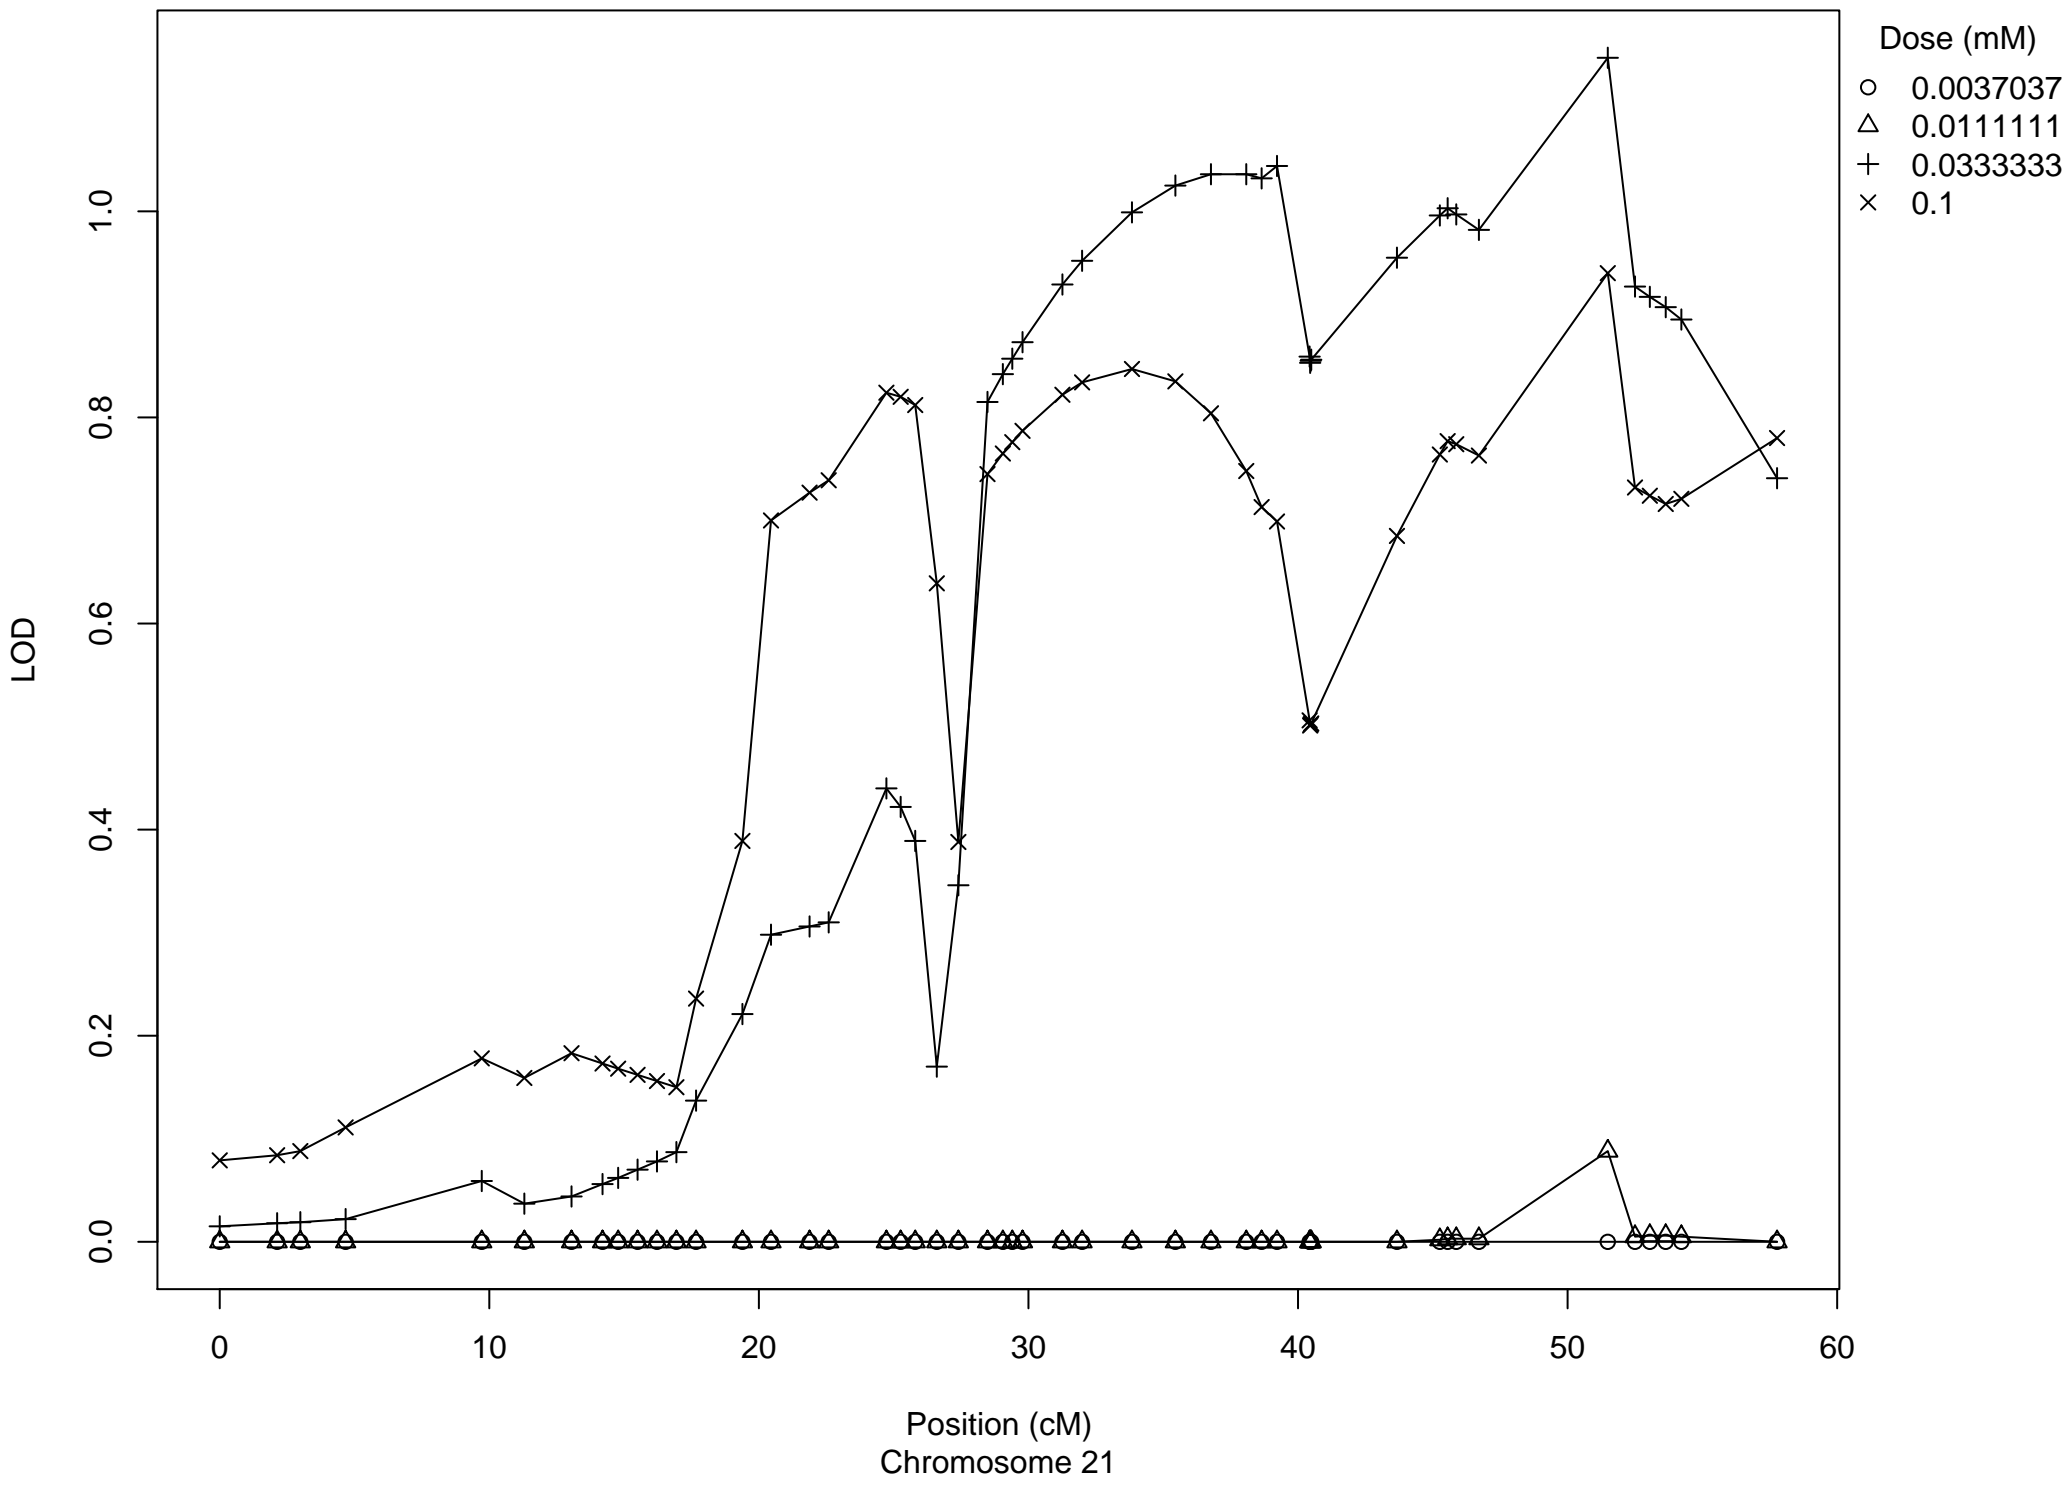

# Oxaliplatin (Oxal)

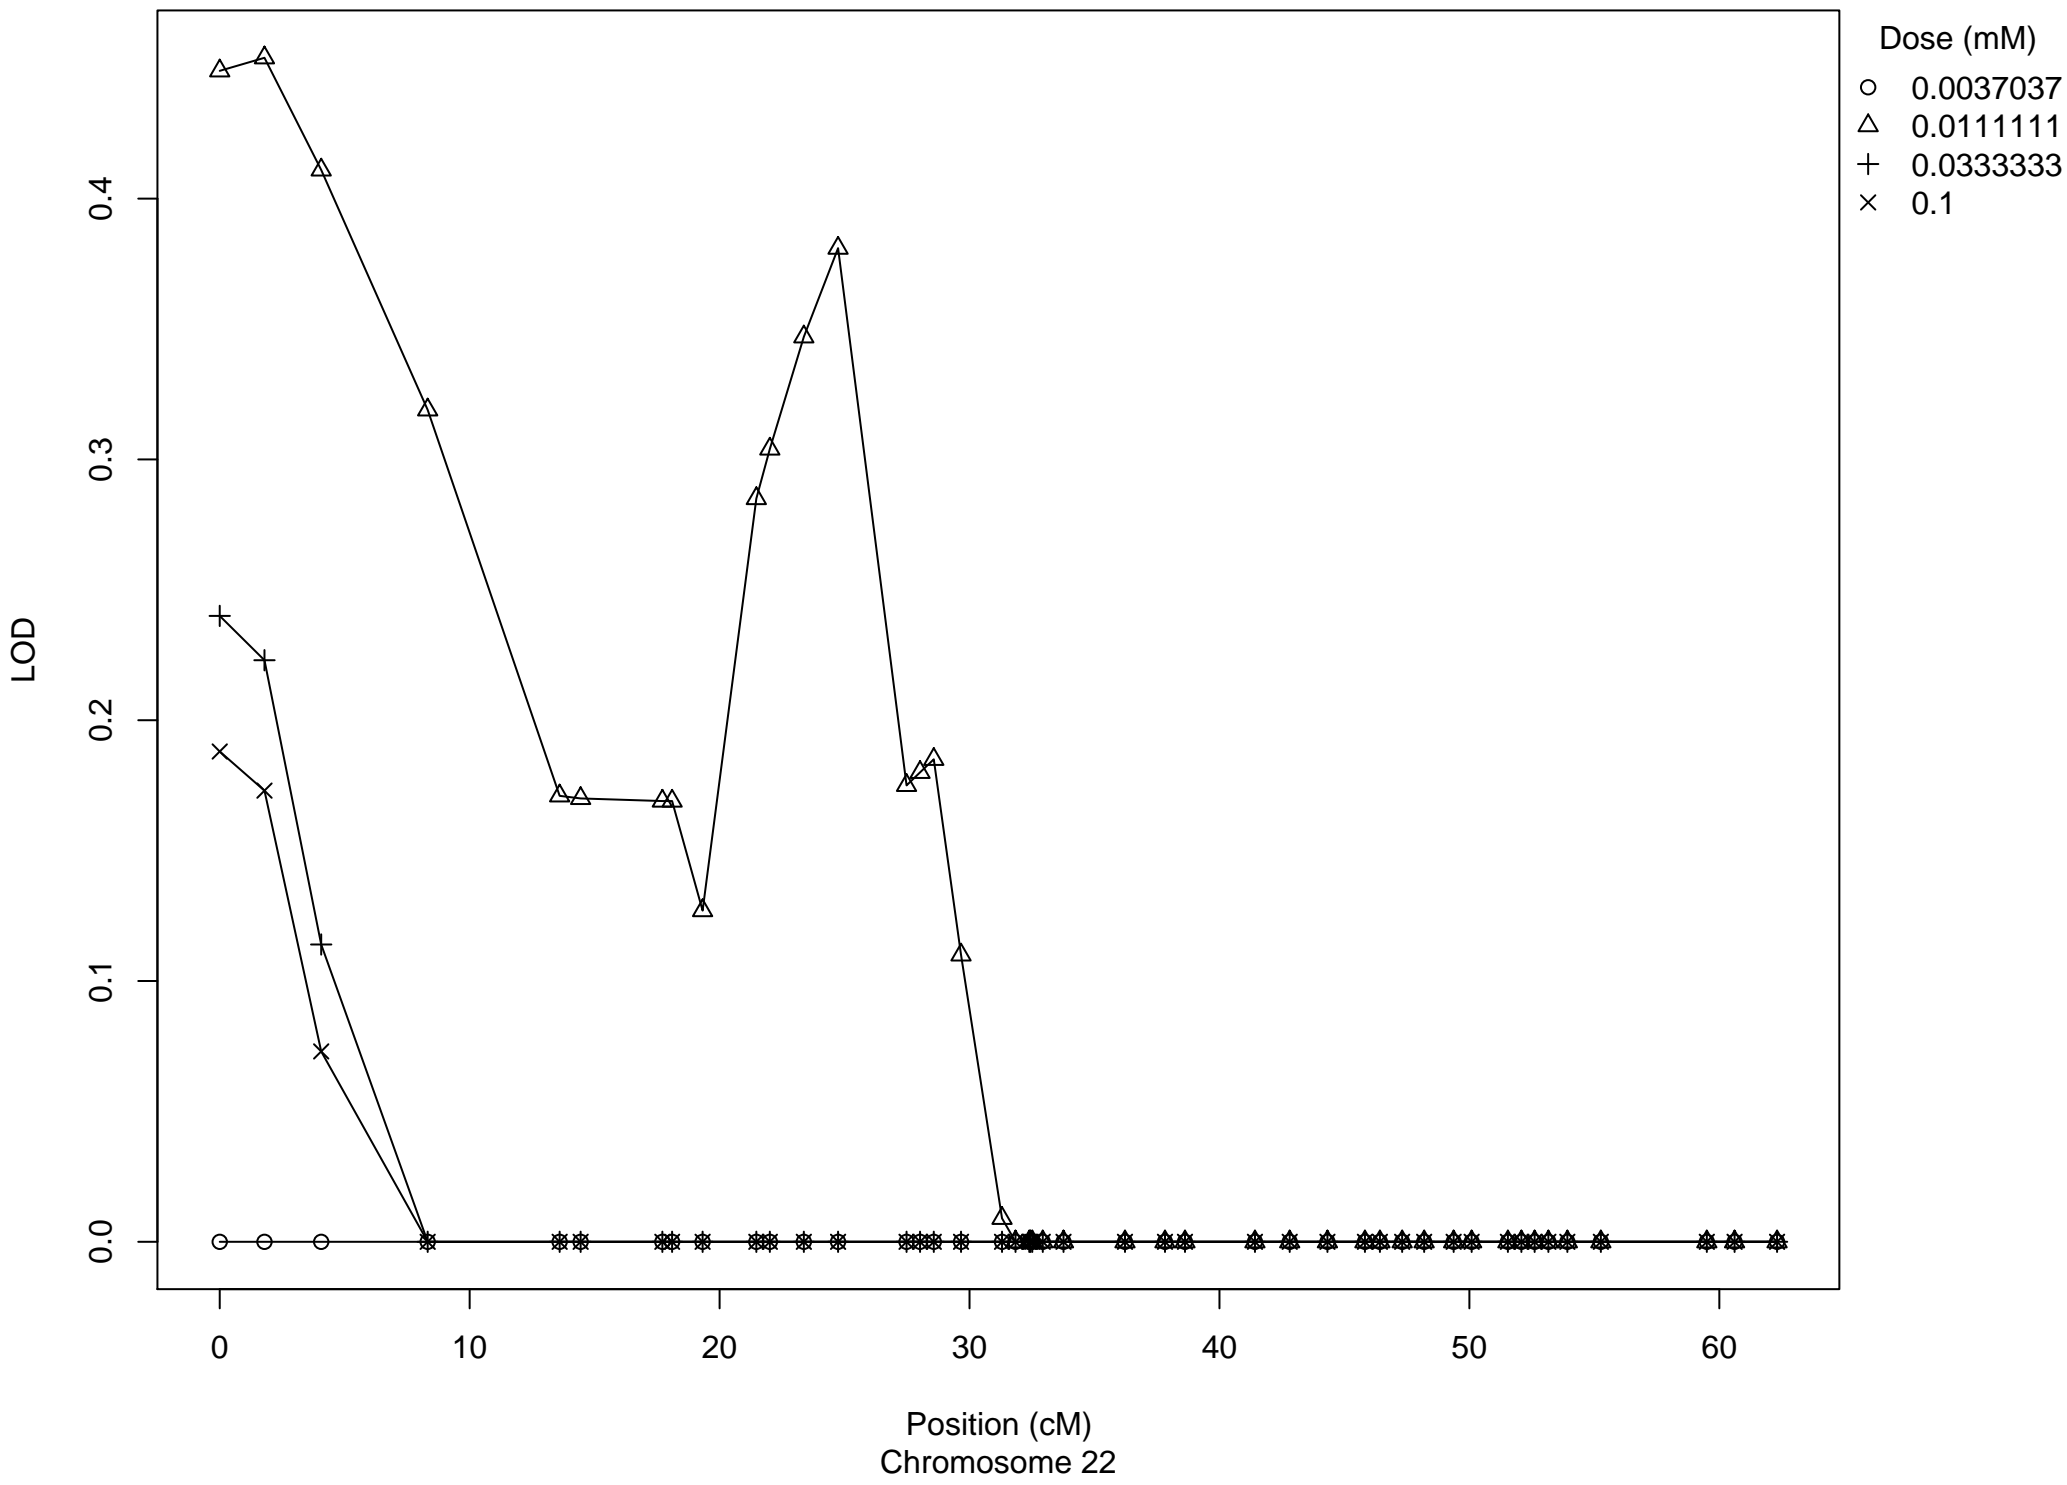

# Paclitaxel from *Taxus Yunnanensis* (Pac)

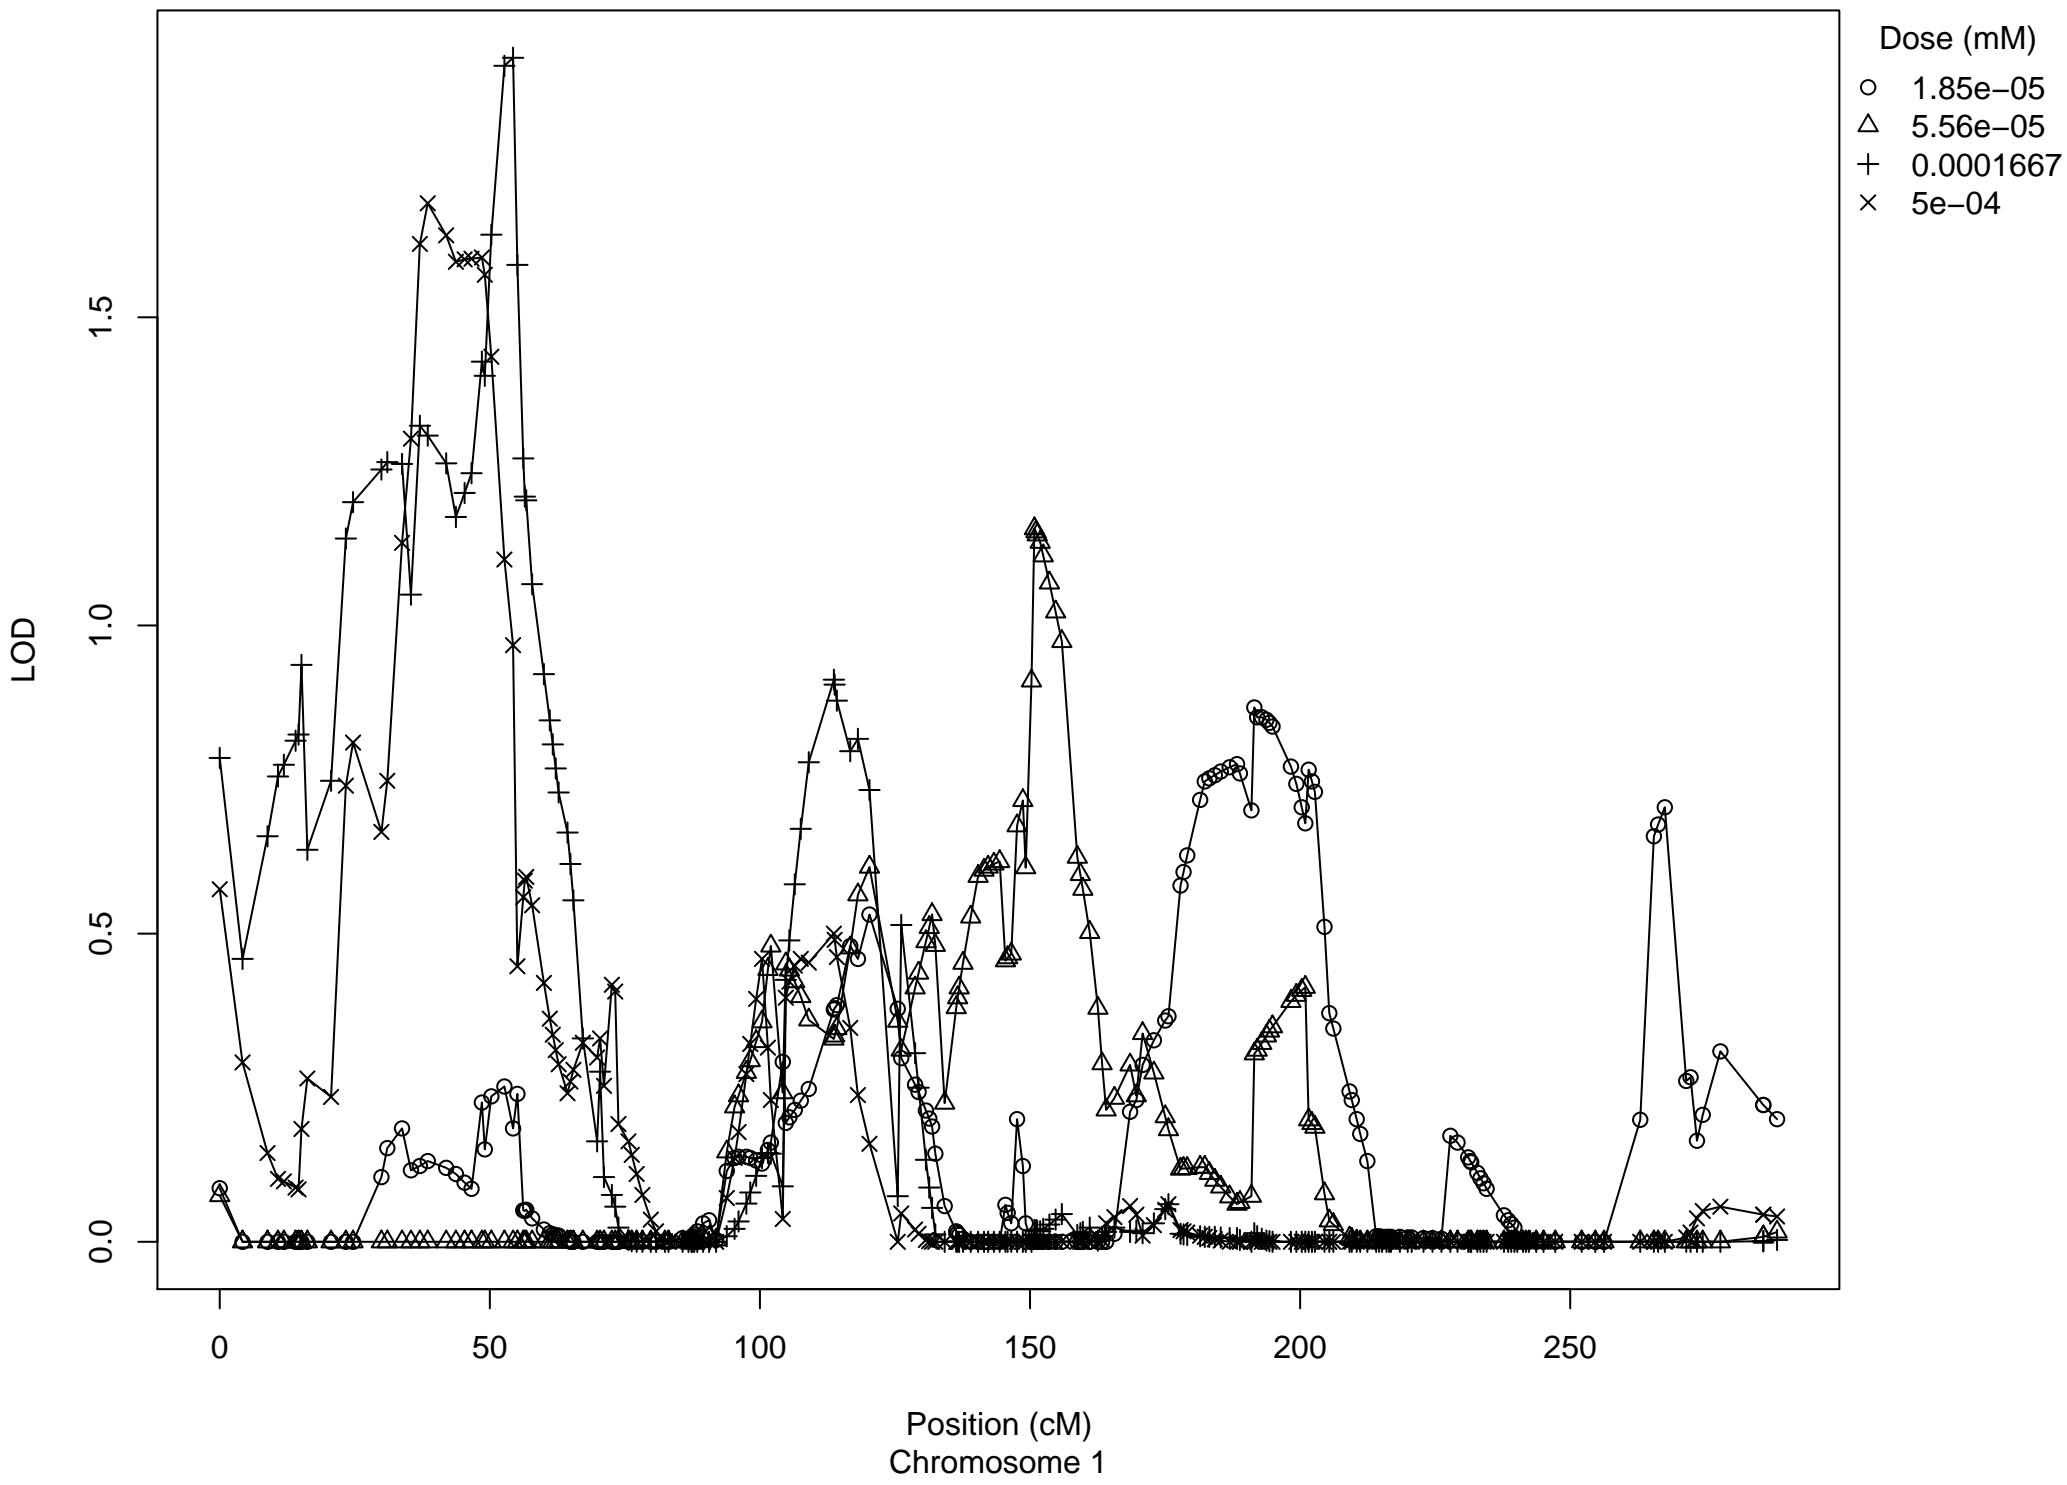

# Paclitaxel from *Taxus Yunnanensis* (Pac)

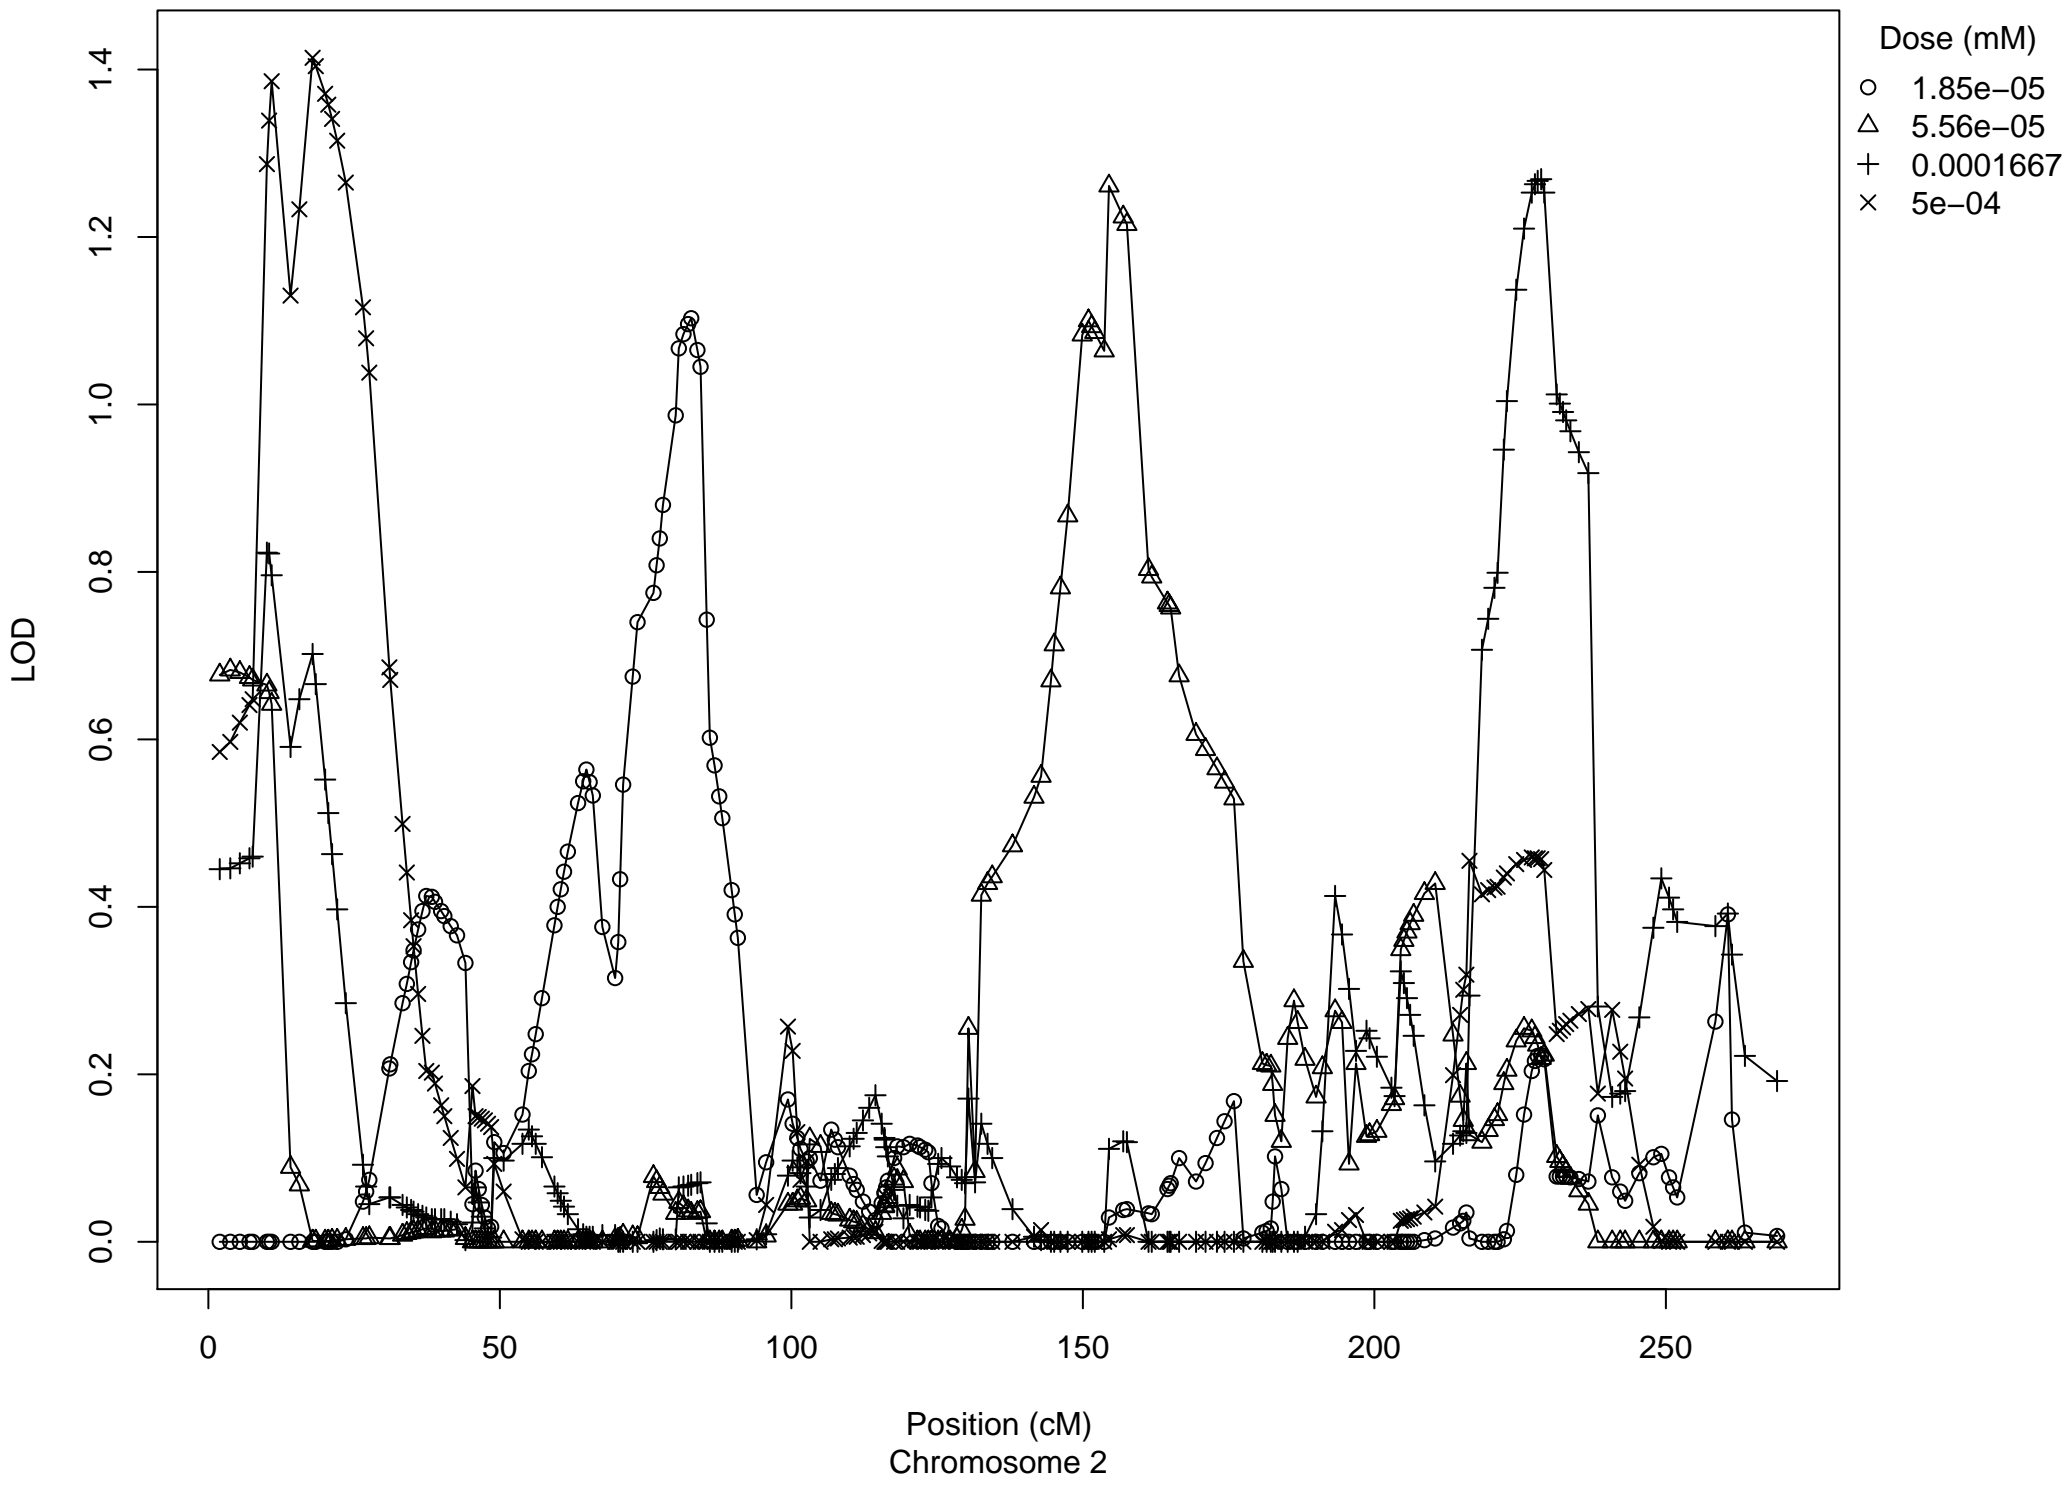



# Paclitaxel from *Taxus Yunnanensis* (Pac)

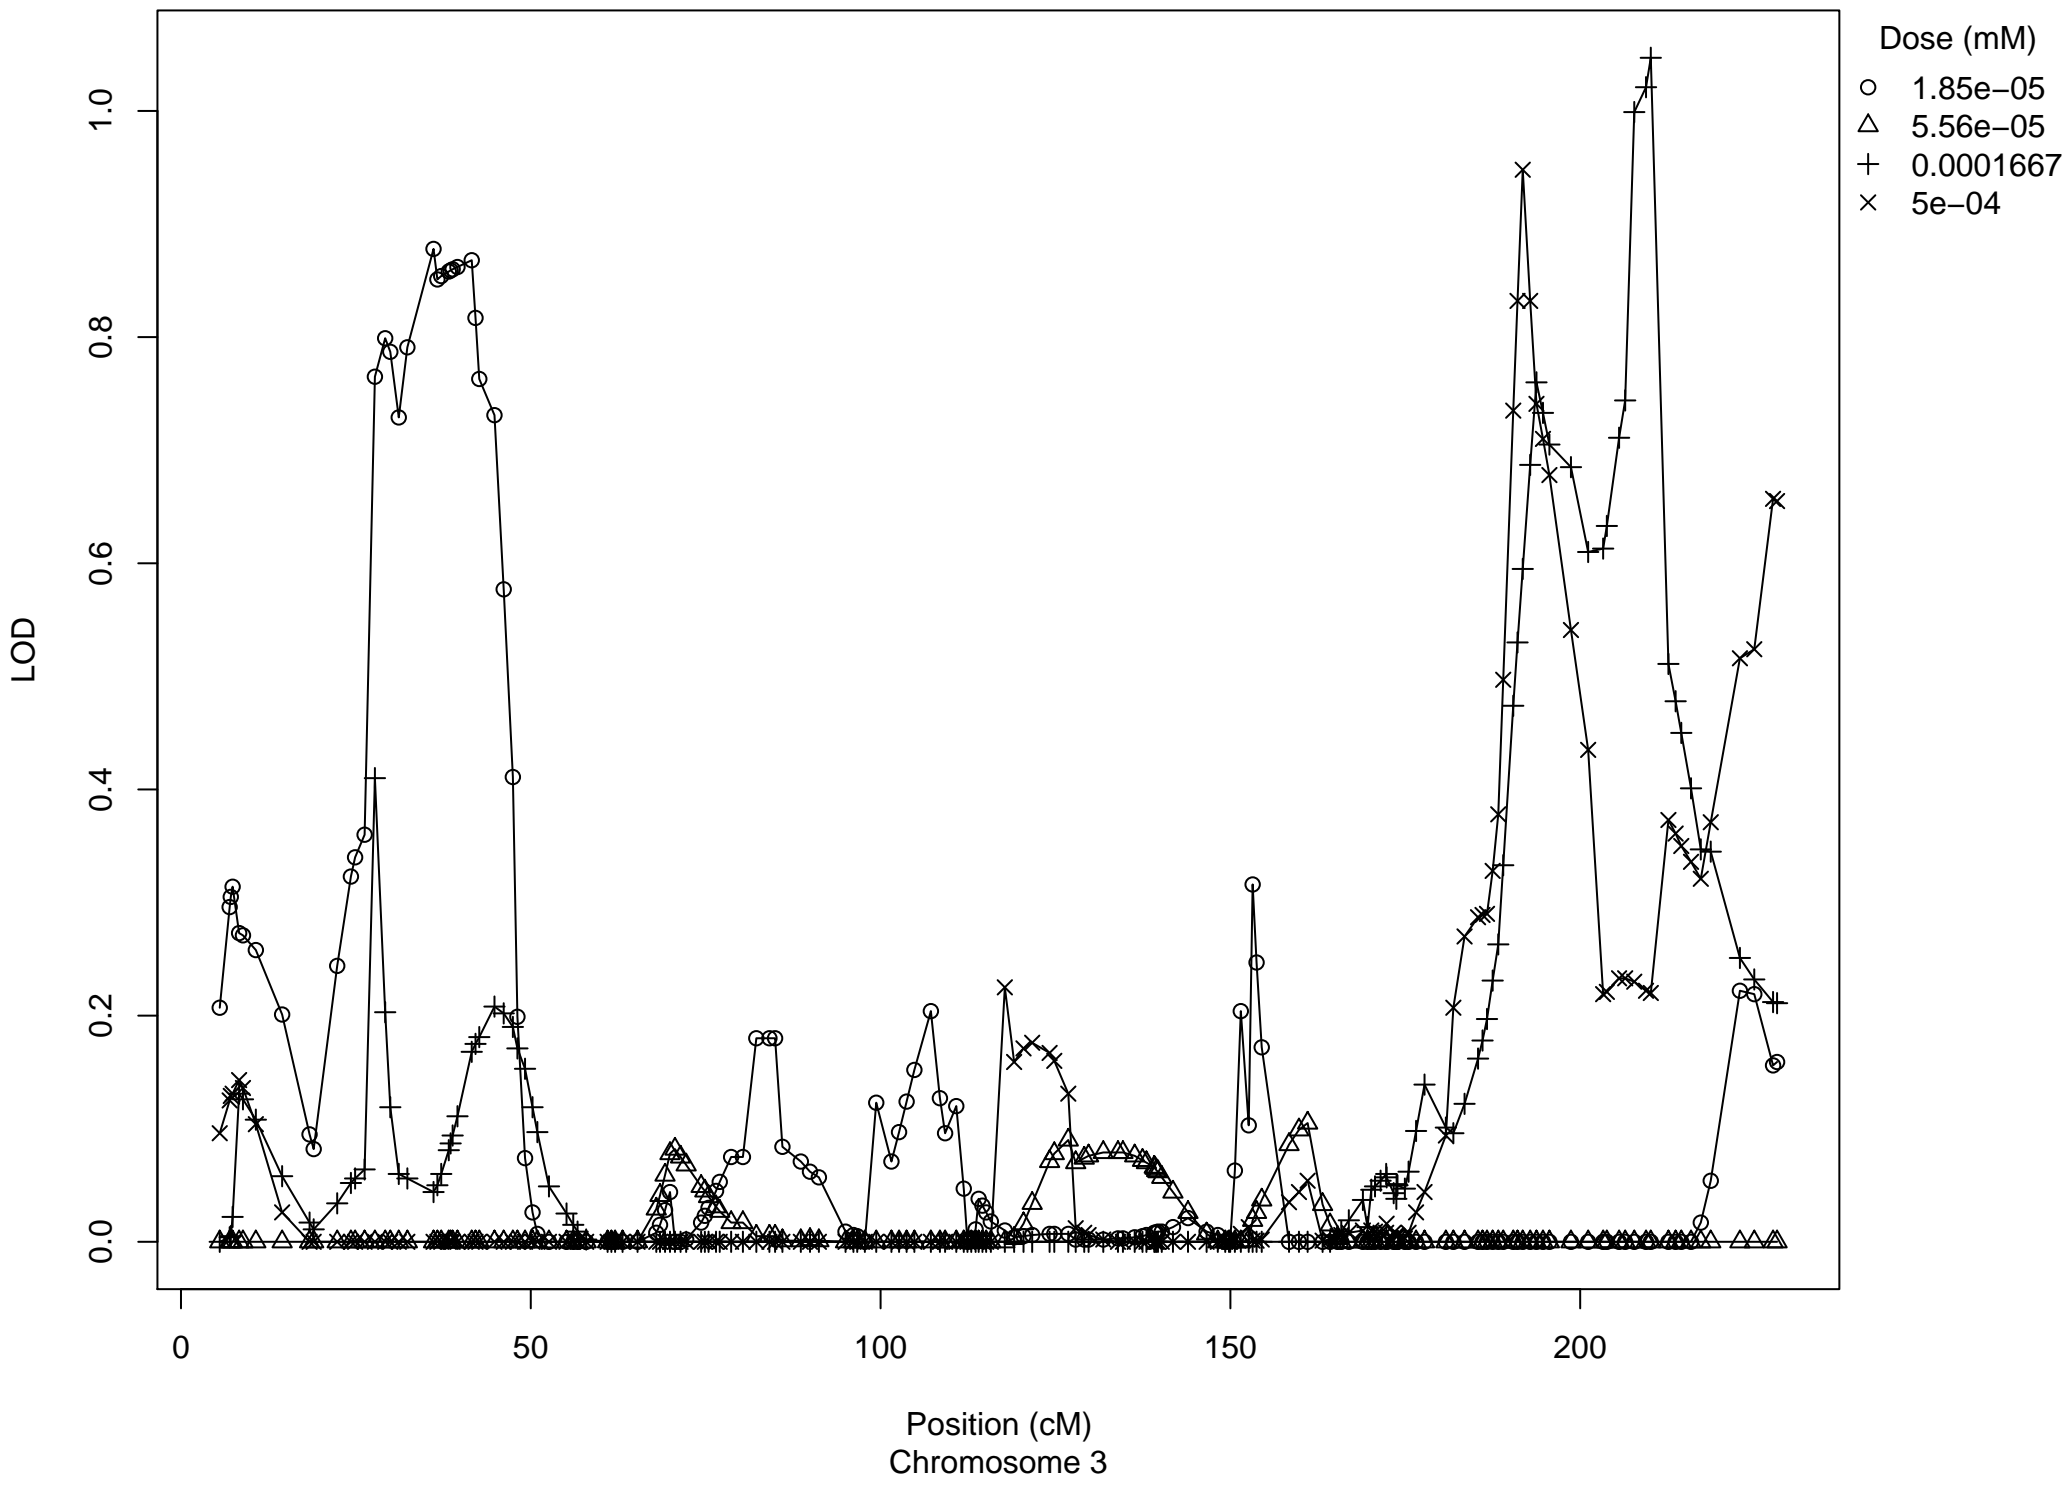

# Paclitaxel from Taxus Yunnanensis (Pac)

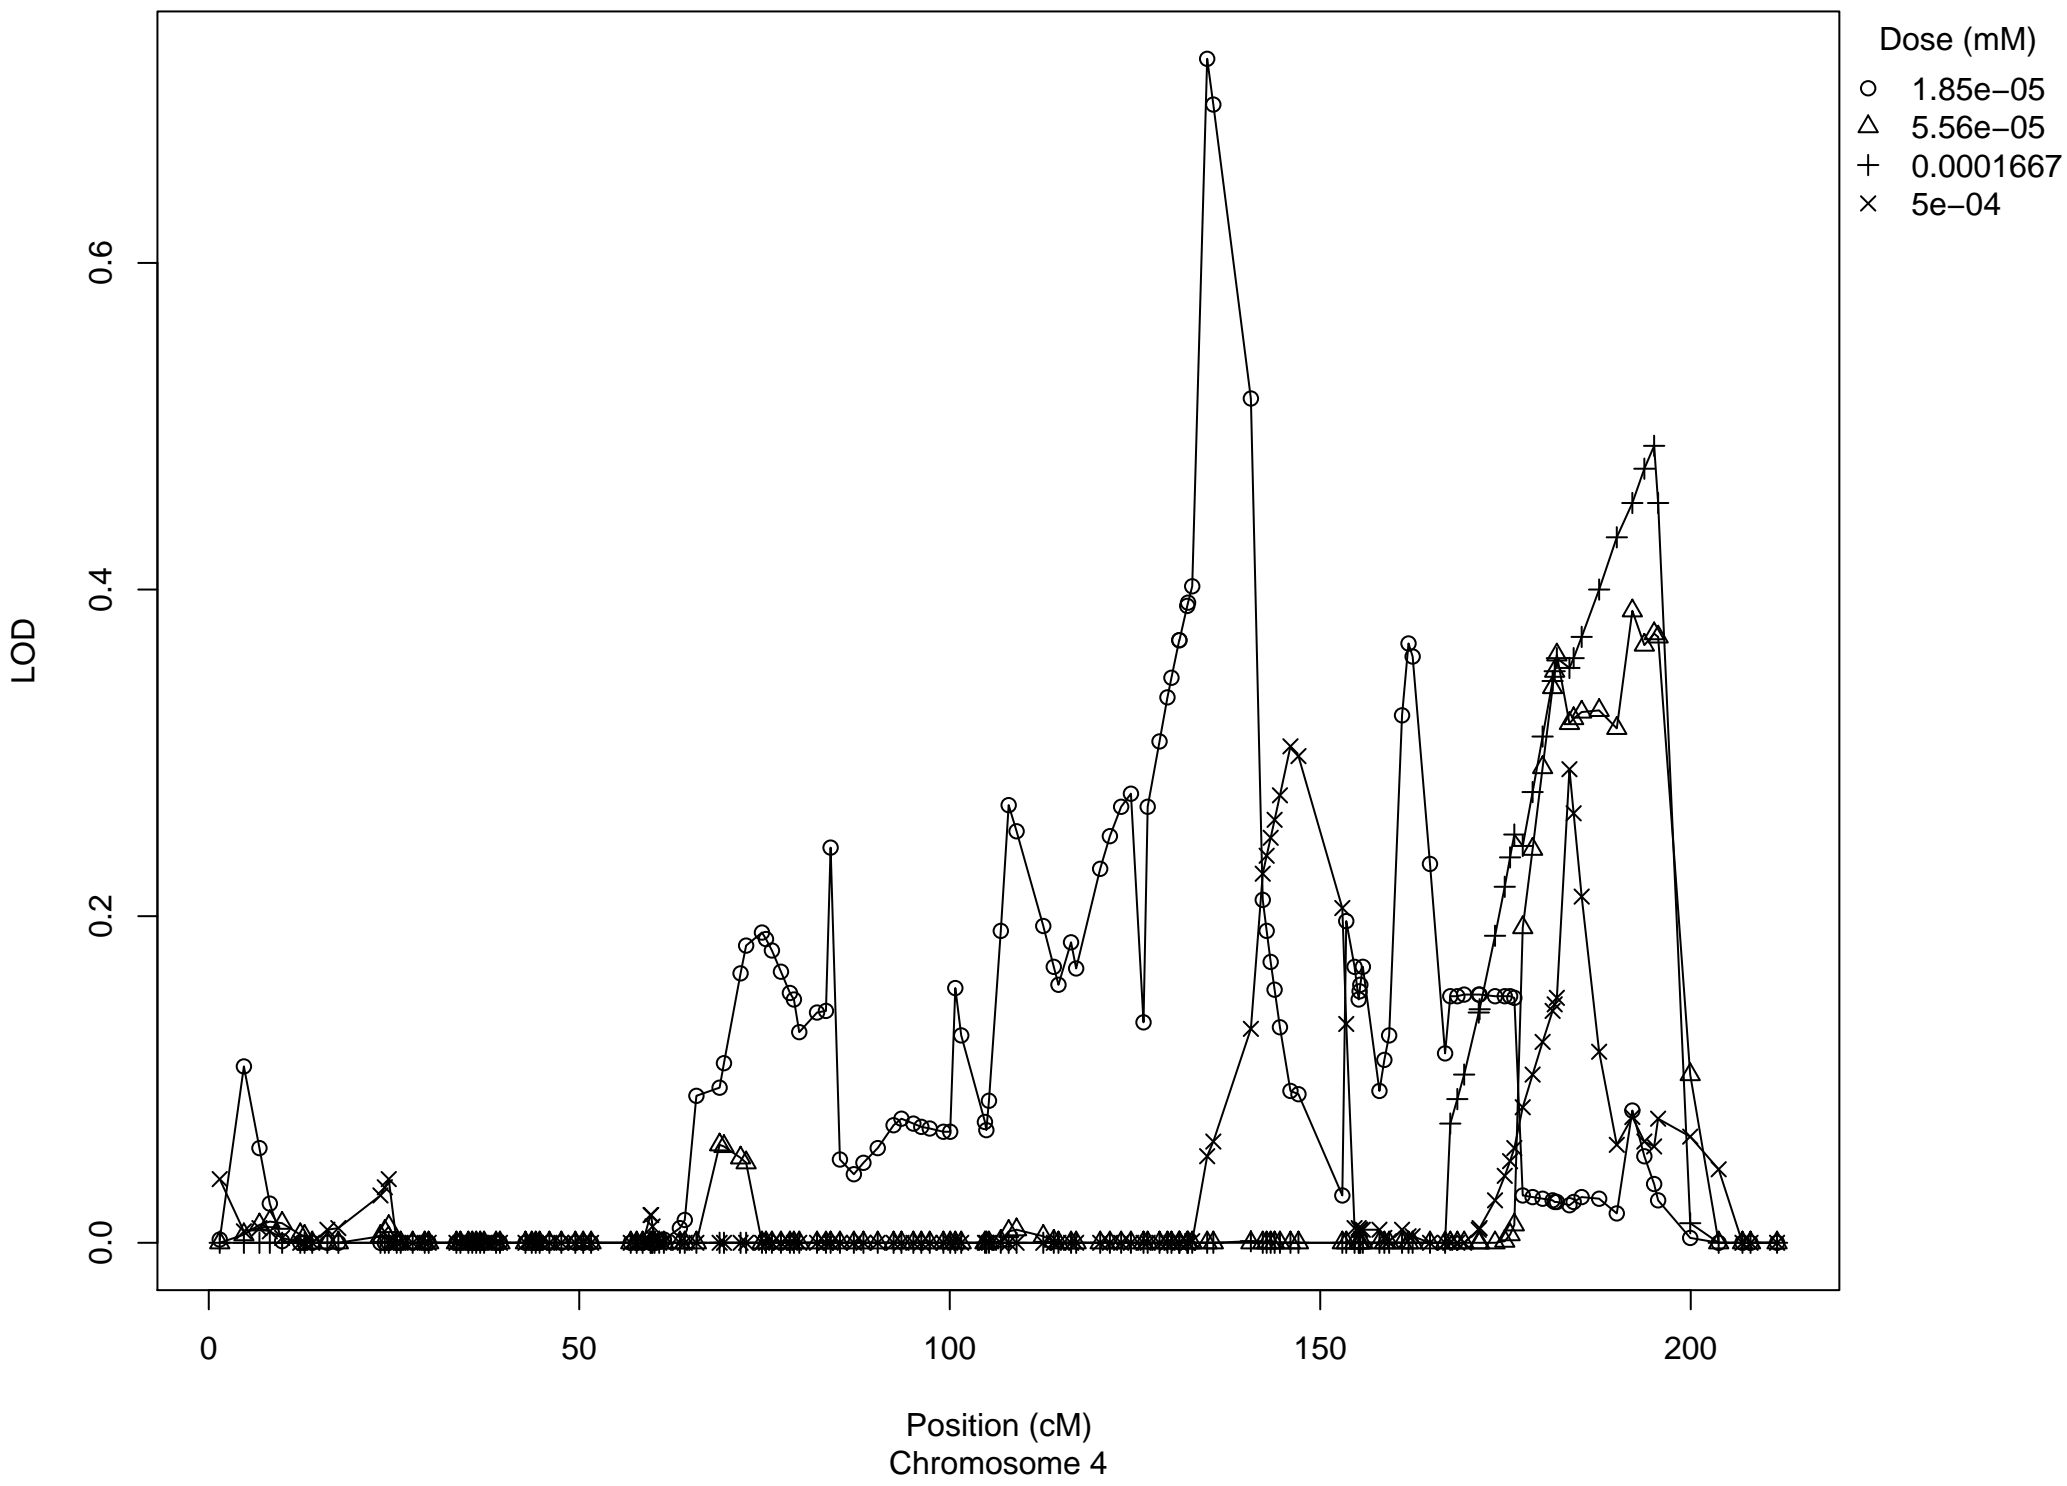

# Paclitaxel from *Taxus Yunnanensis* (Pac)

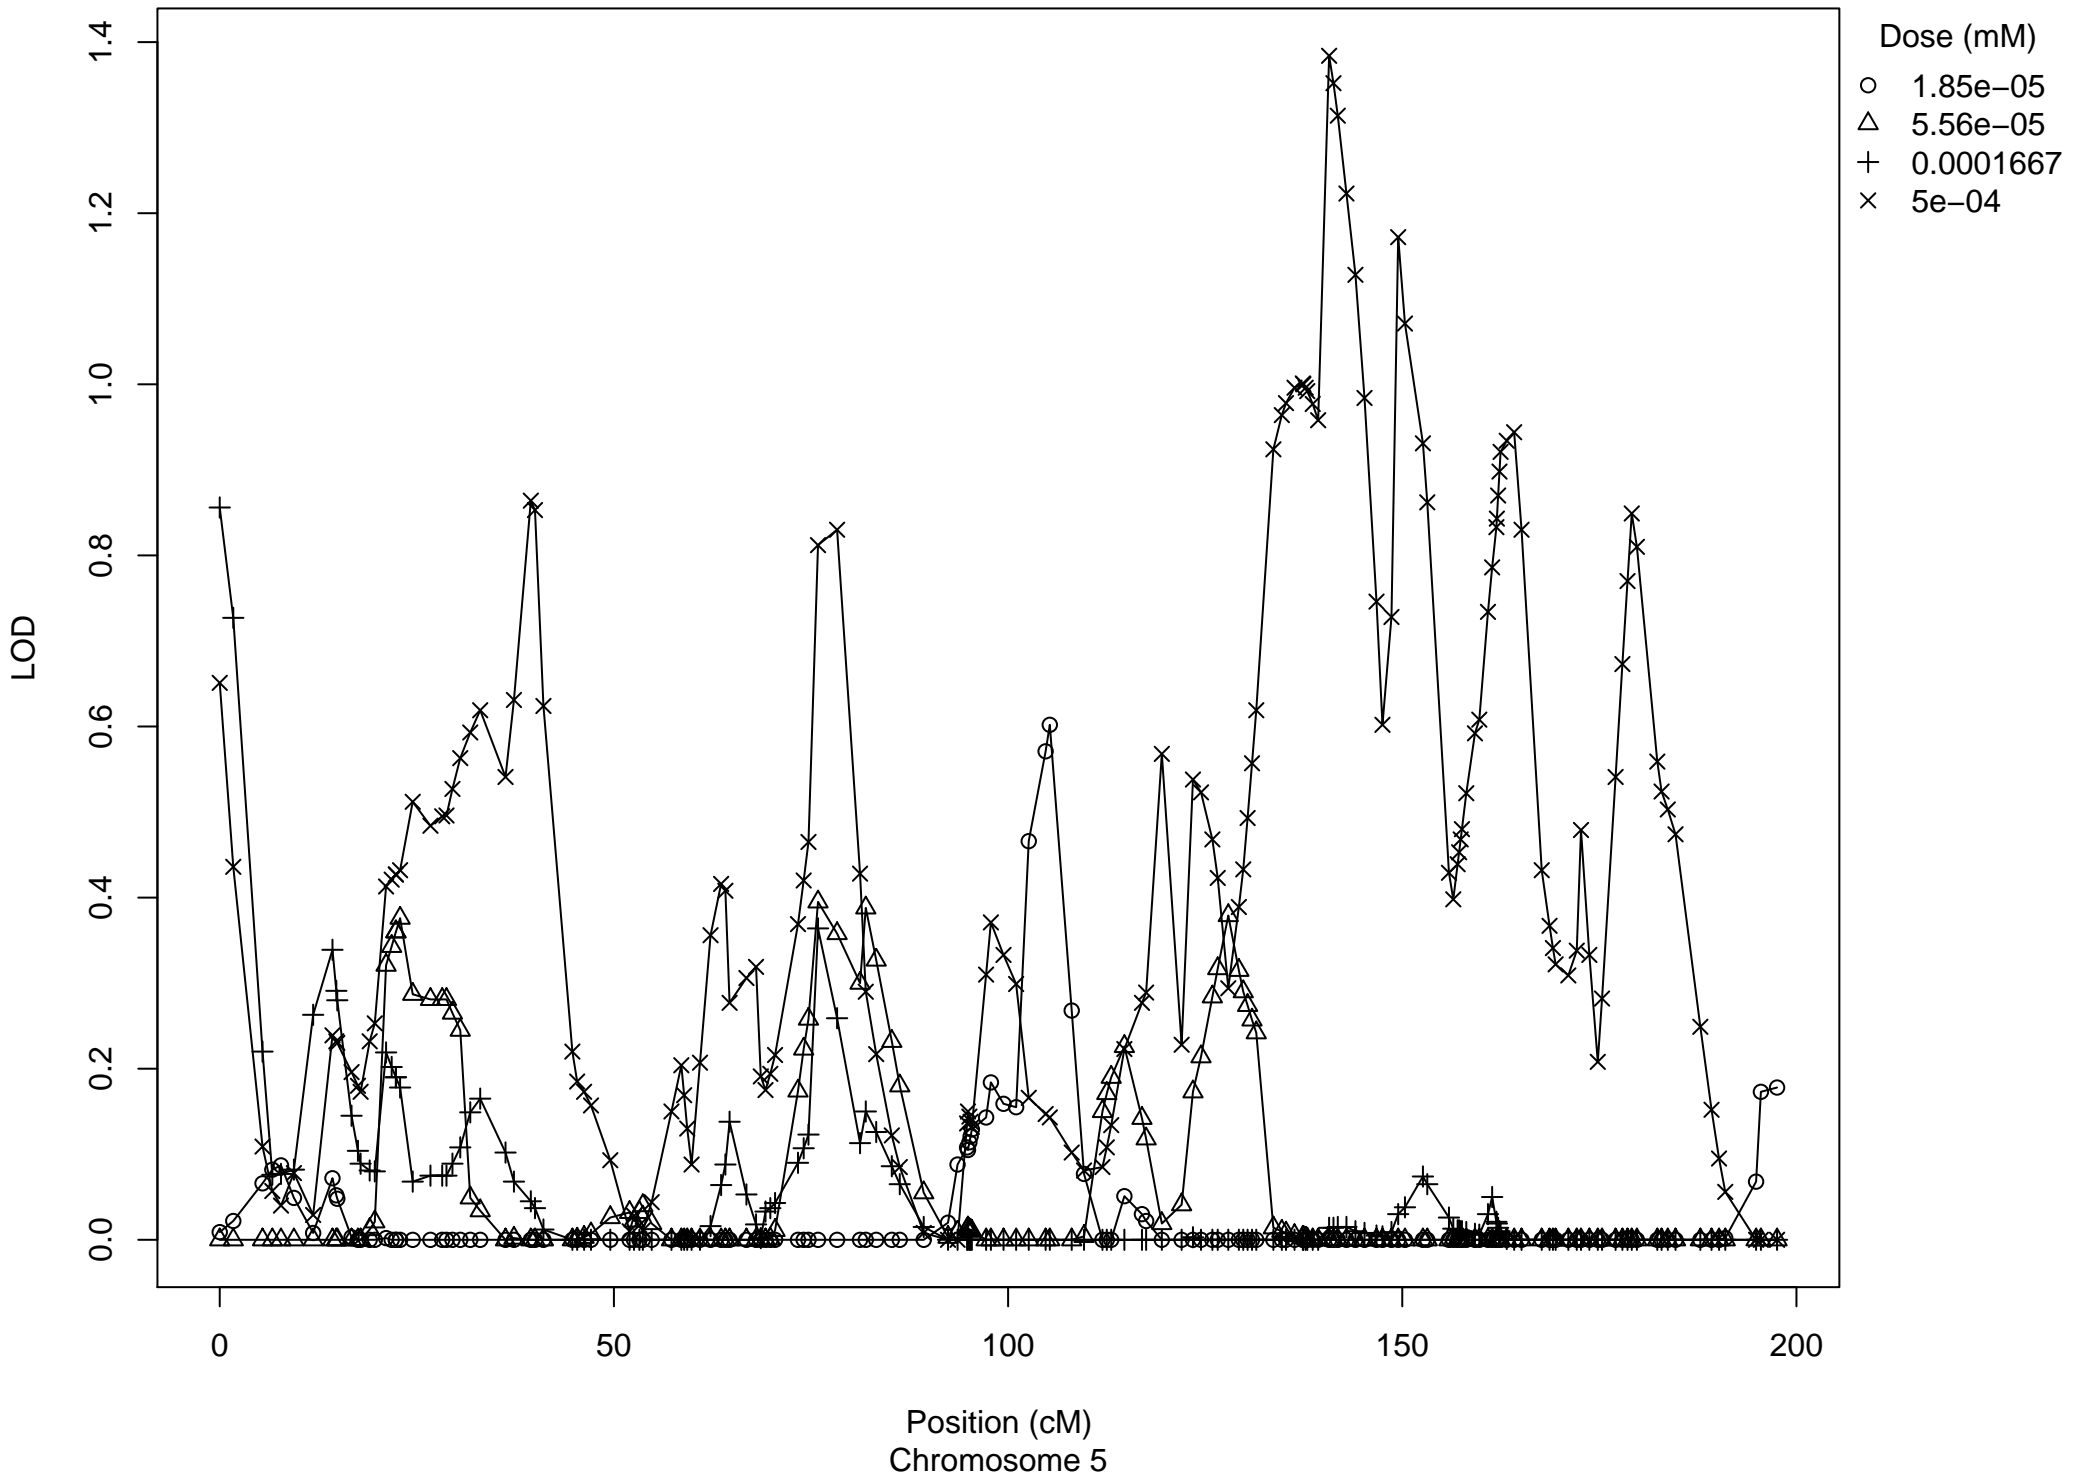

# Paclitaxel from Taxus Yunnanensis (Pac)

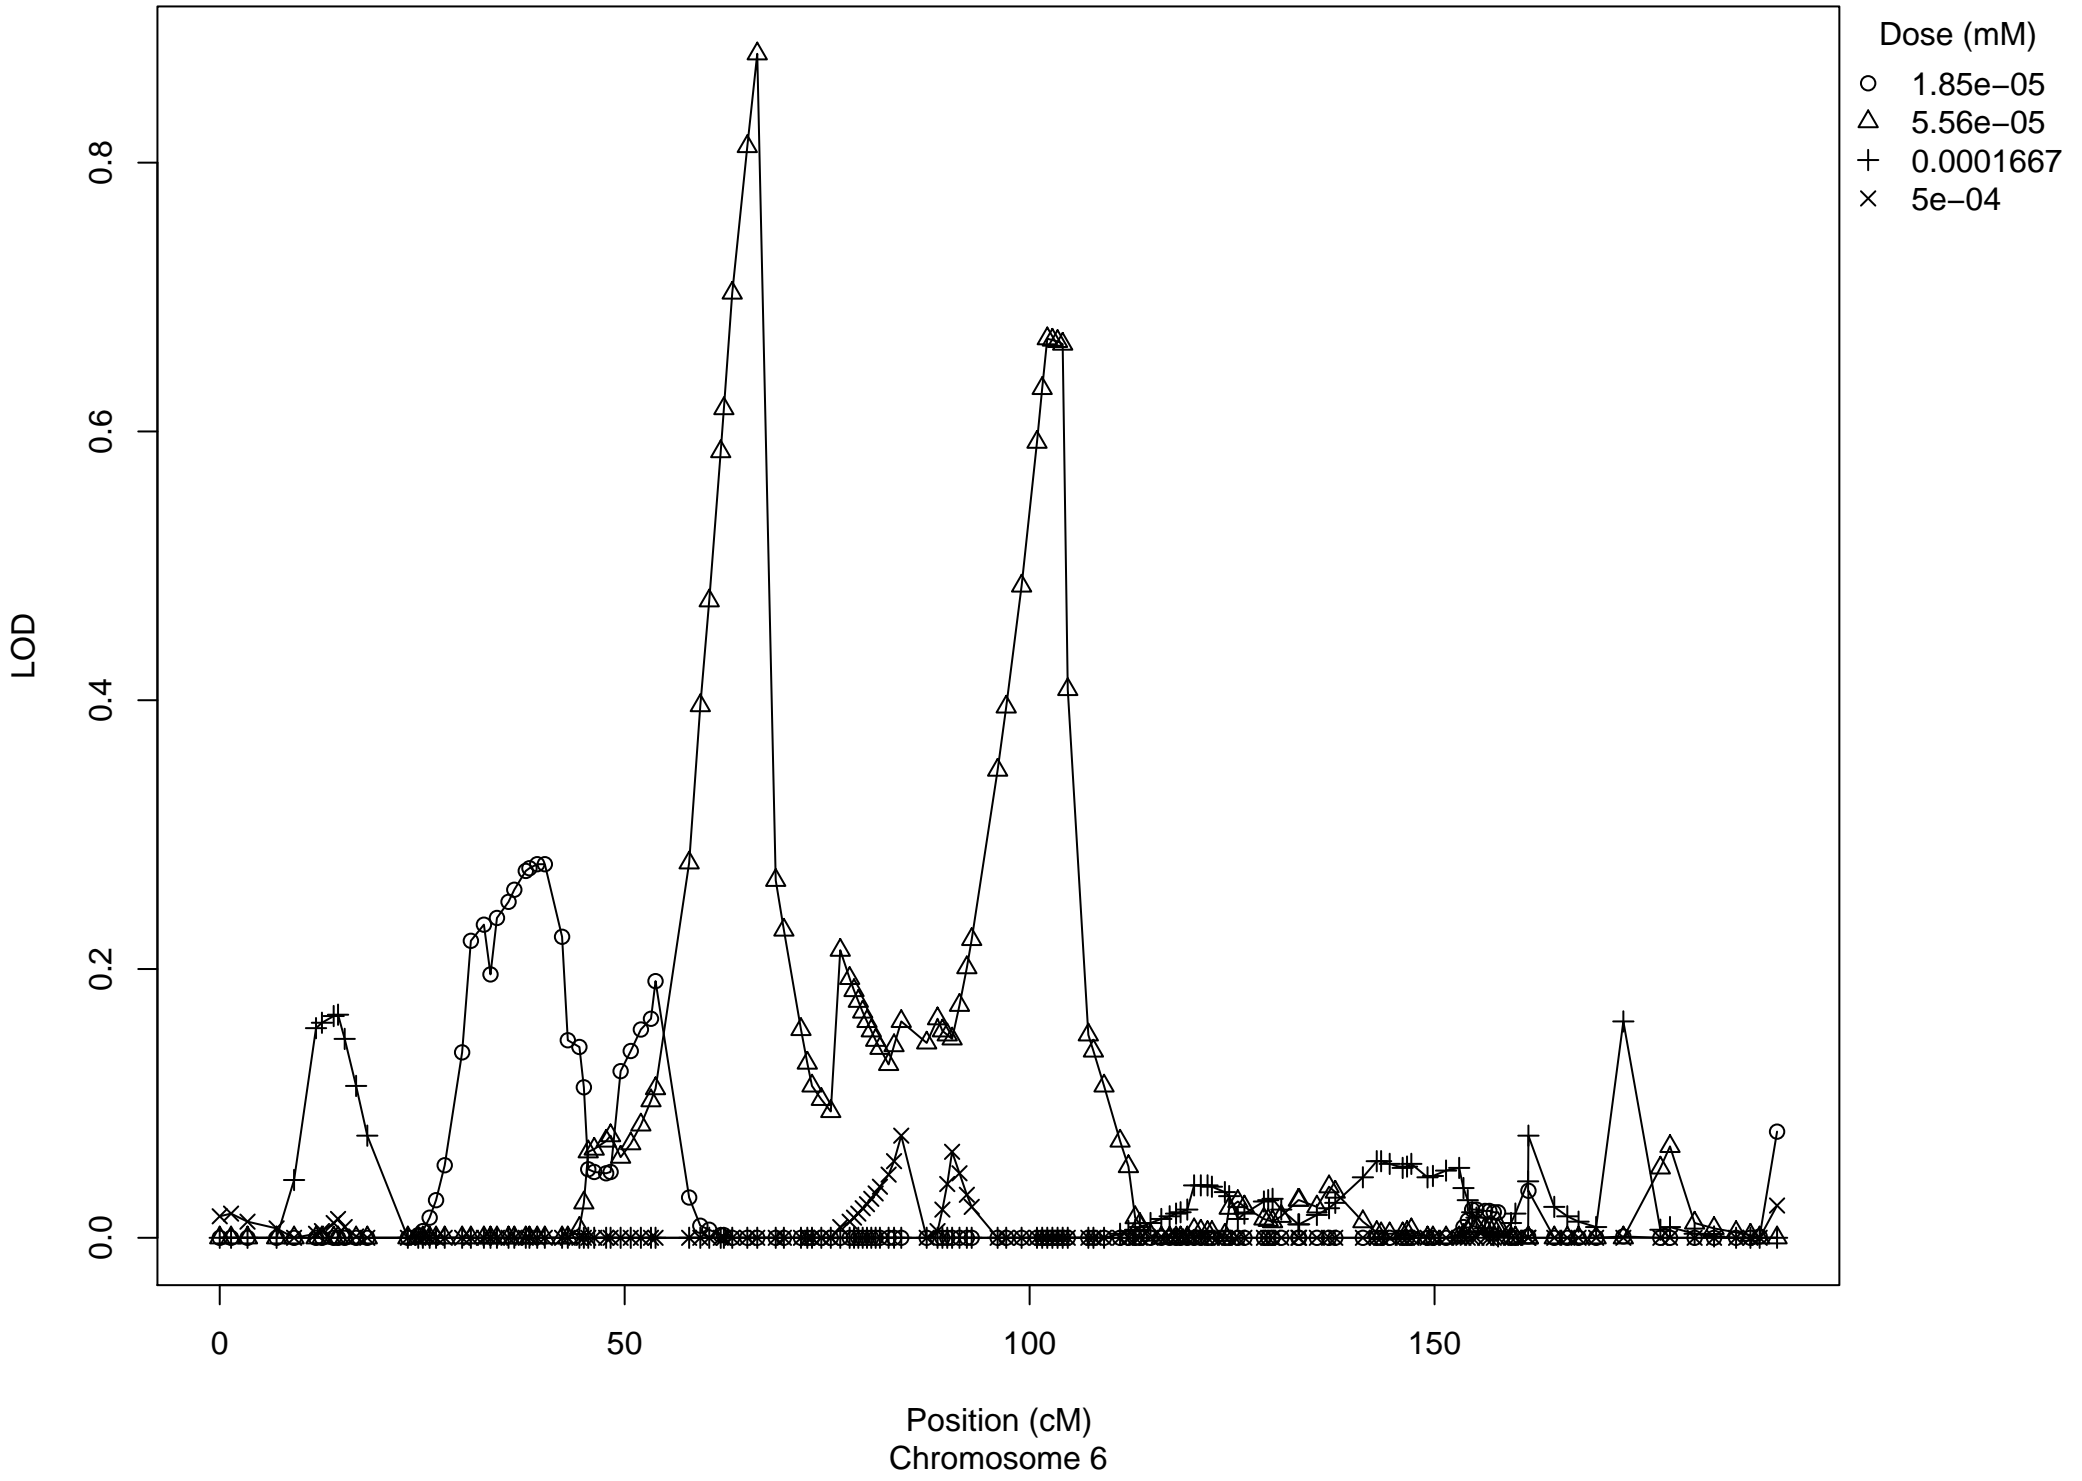

# Paclitaxel from *Taxus Yunnanensis* (Pac)

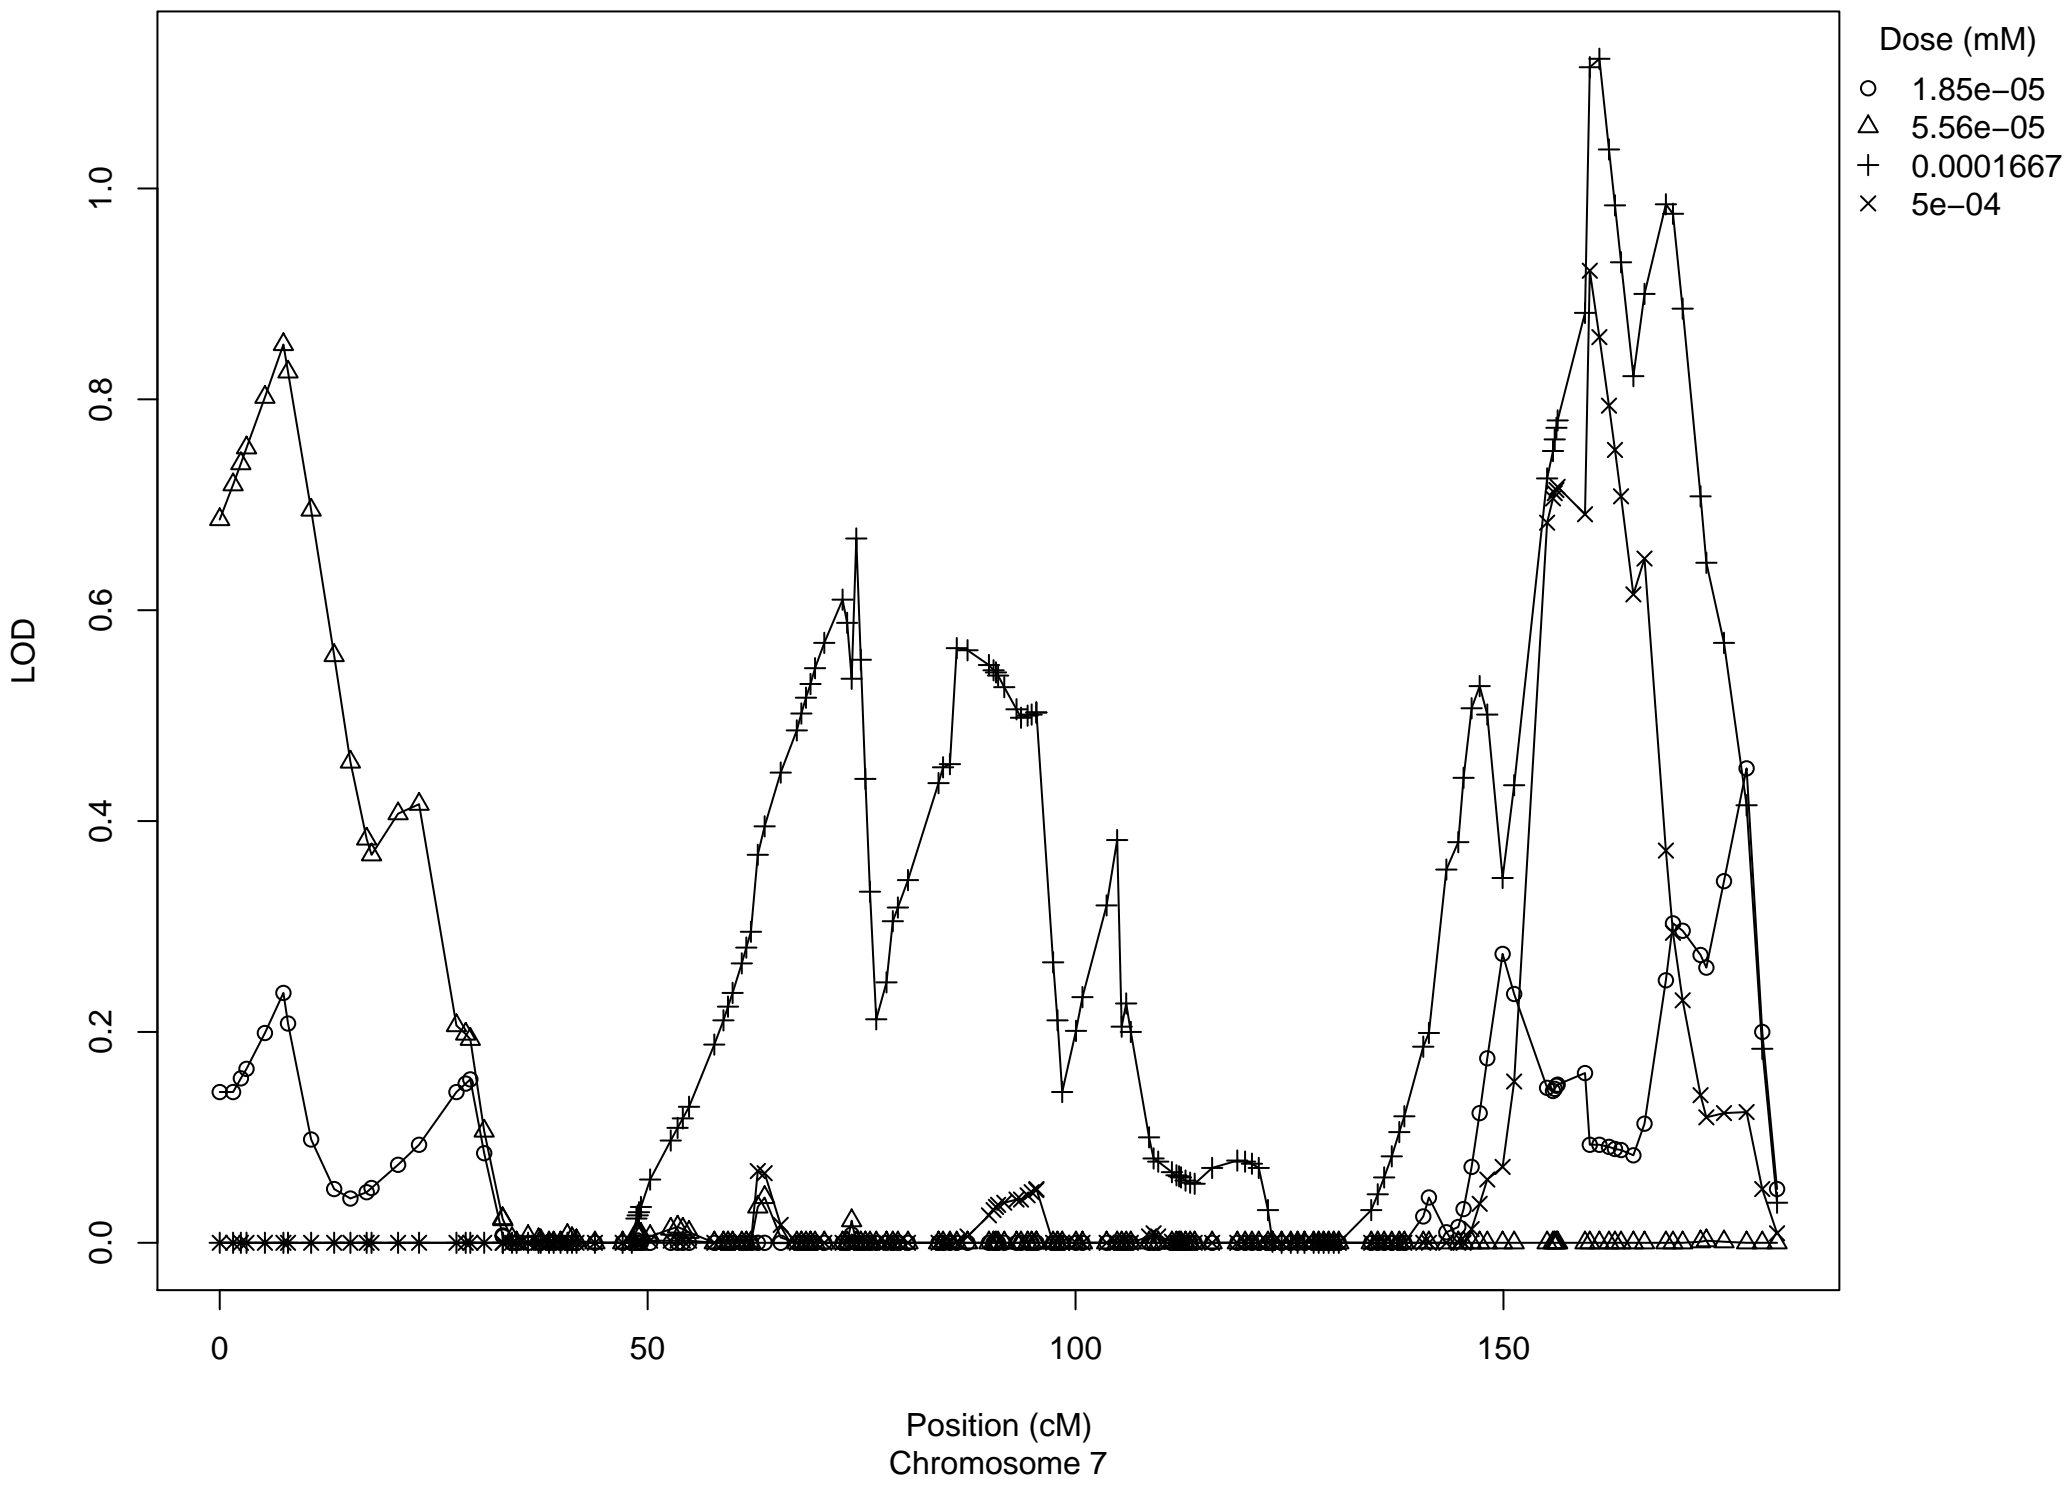

# Paclitaxel from *Taxus Yunnanensis* (Pac)

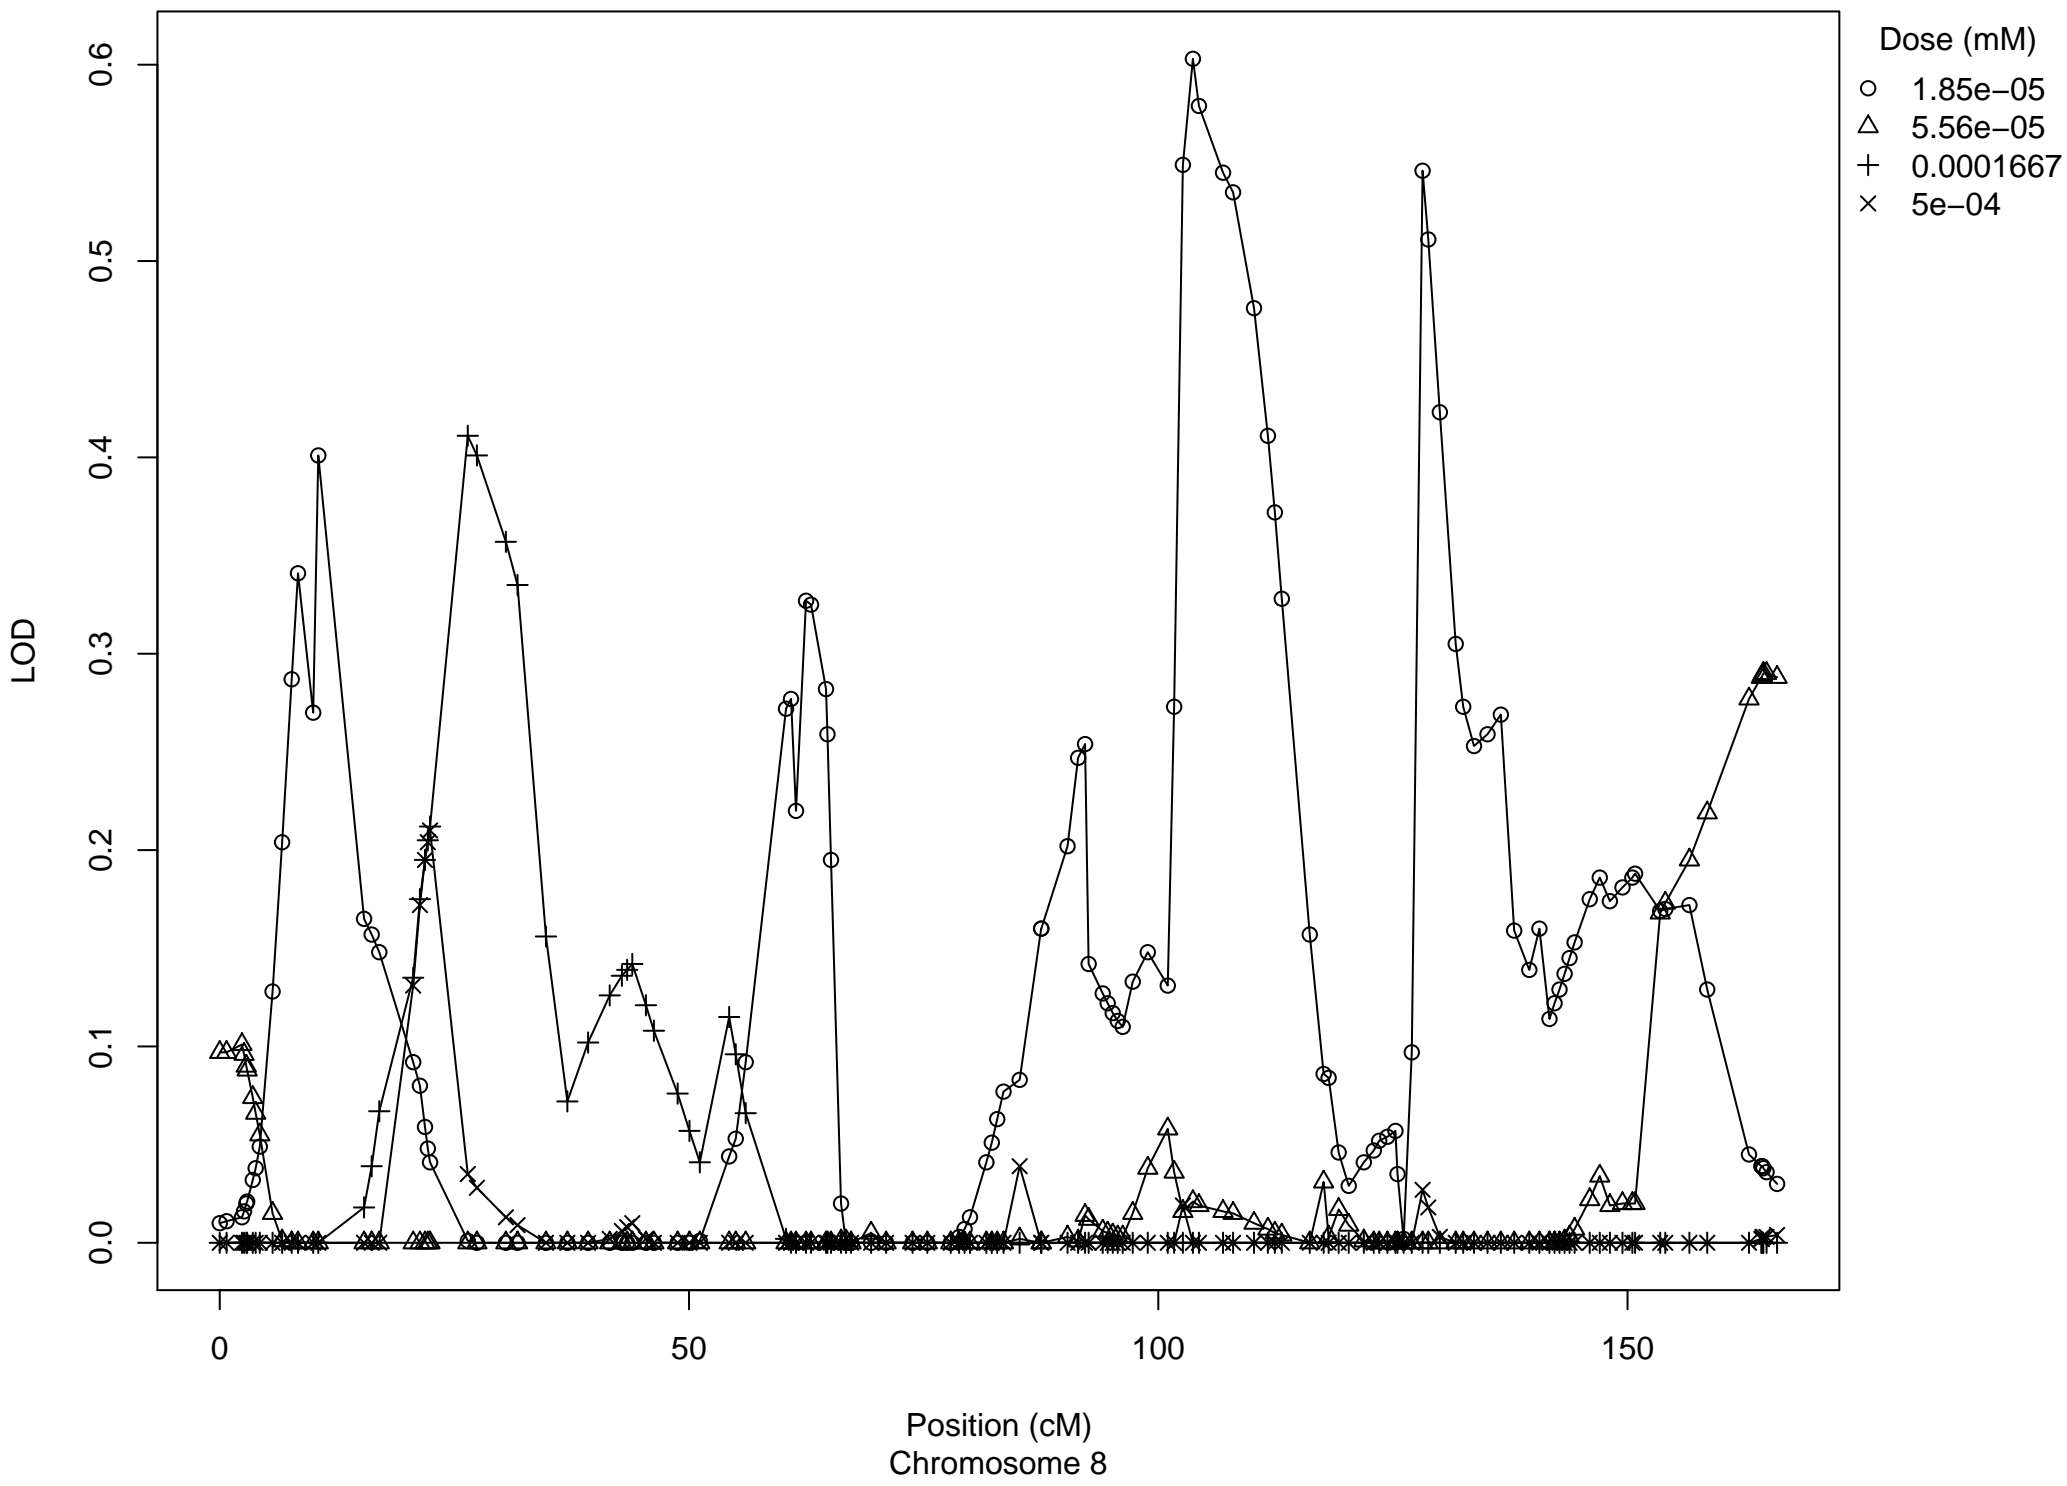

# Paclitaxel from Taxus Yunnanensis (Pac)

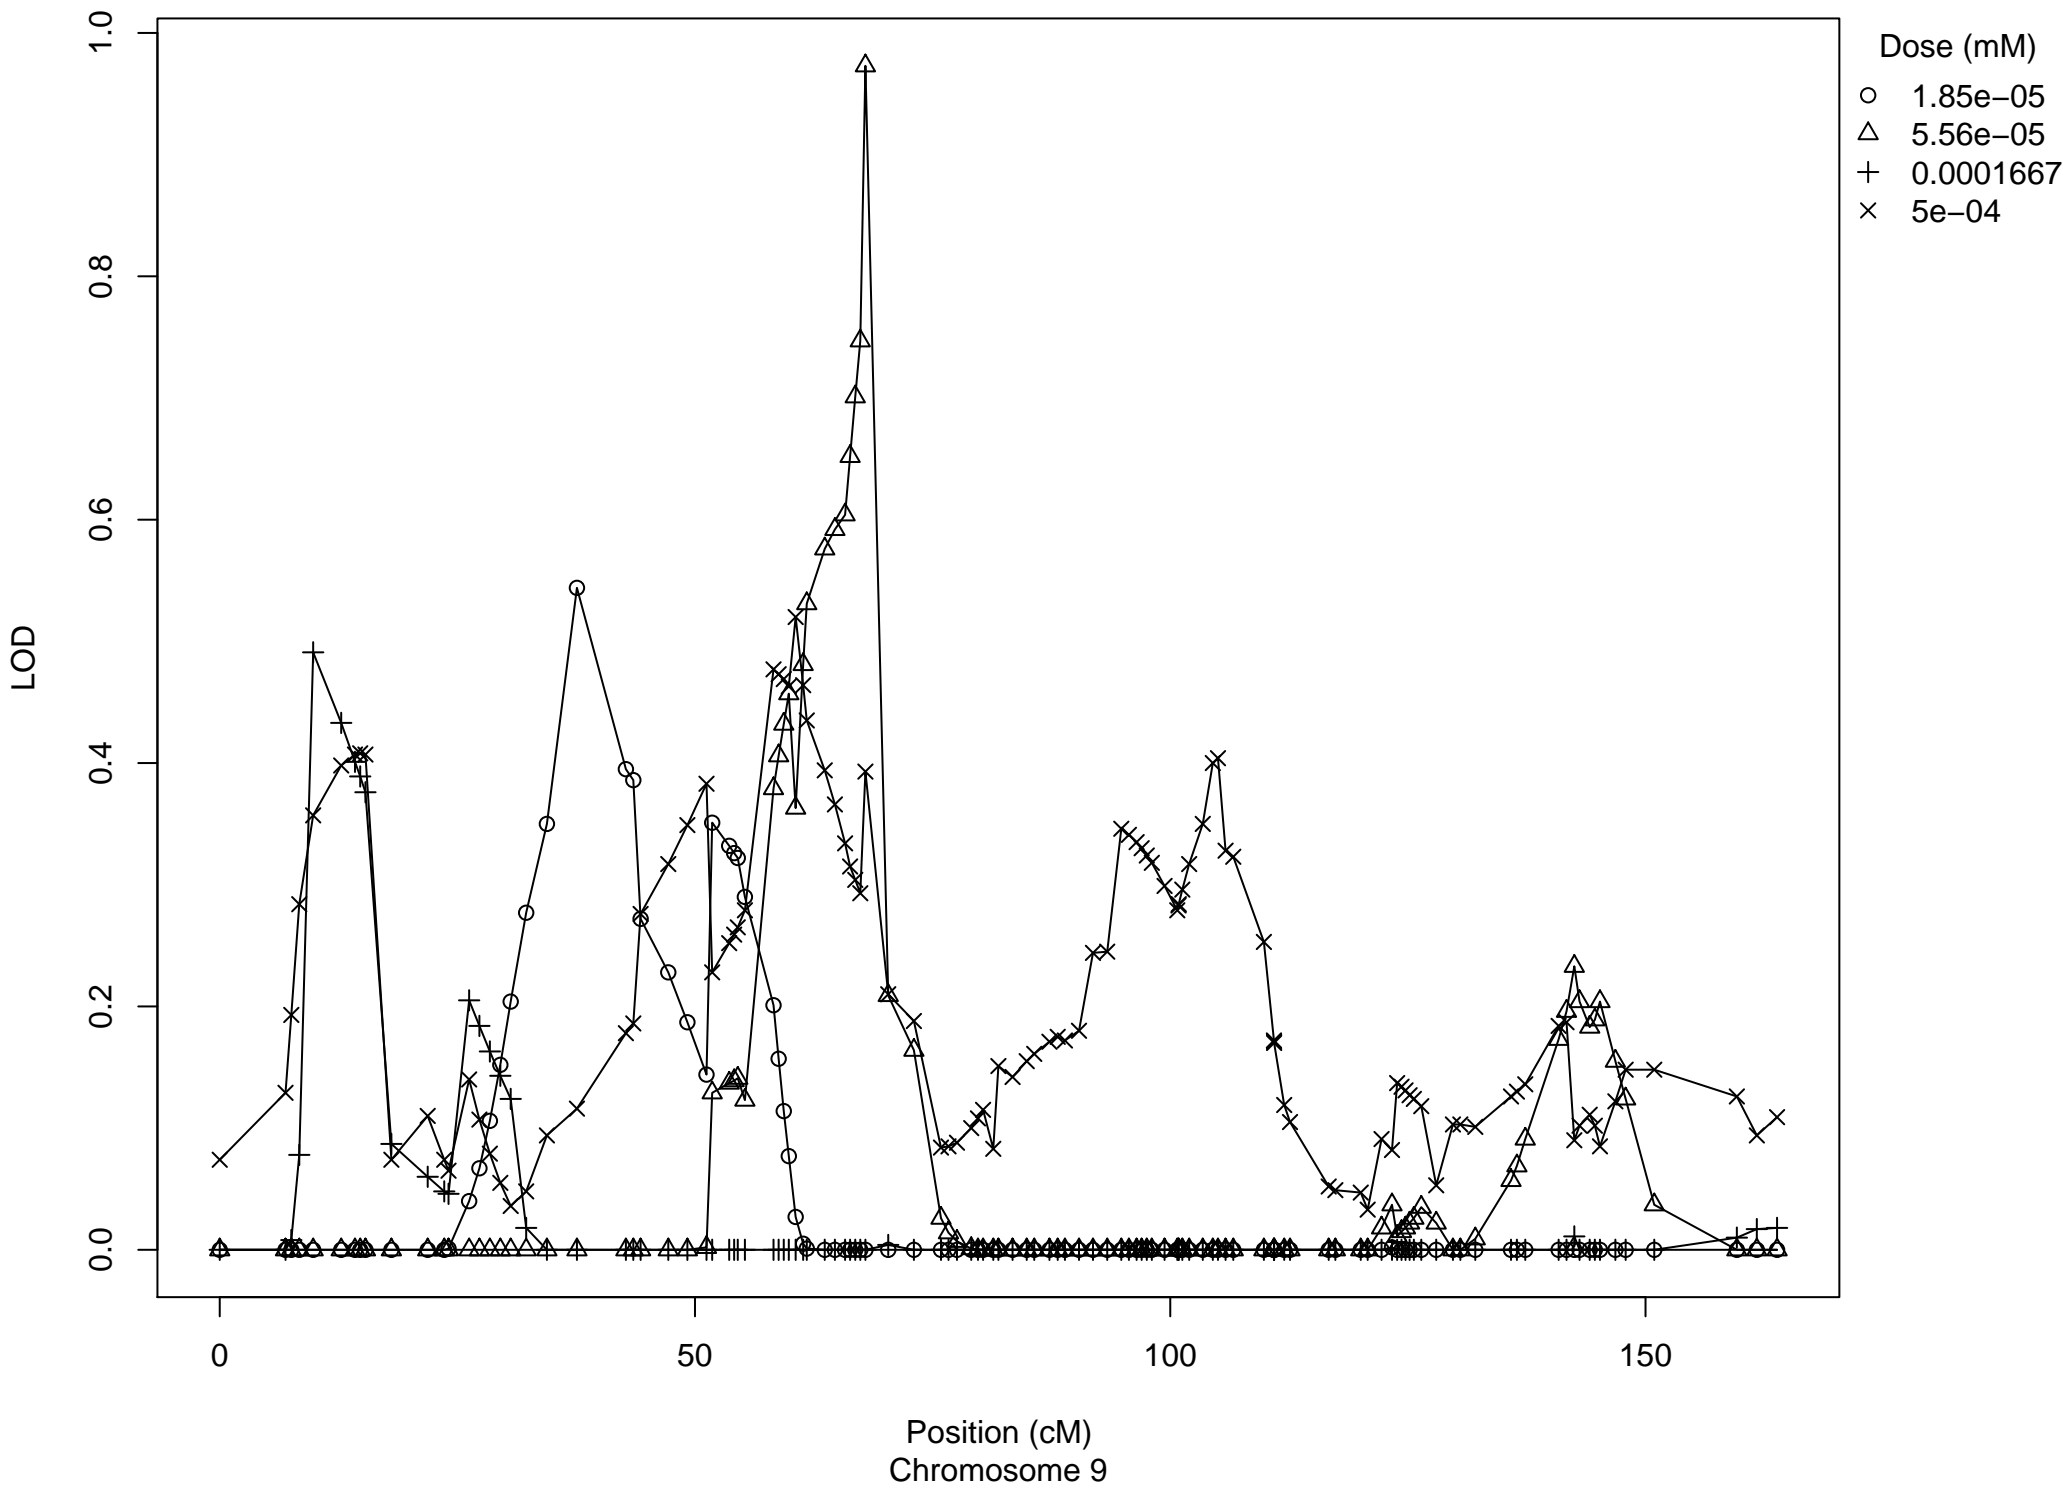

# Paclitaxel from *Taxus Yunnanensis* (Pac)

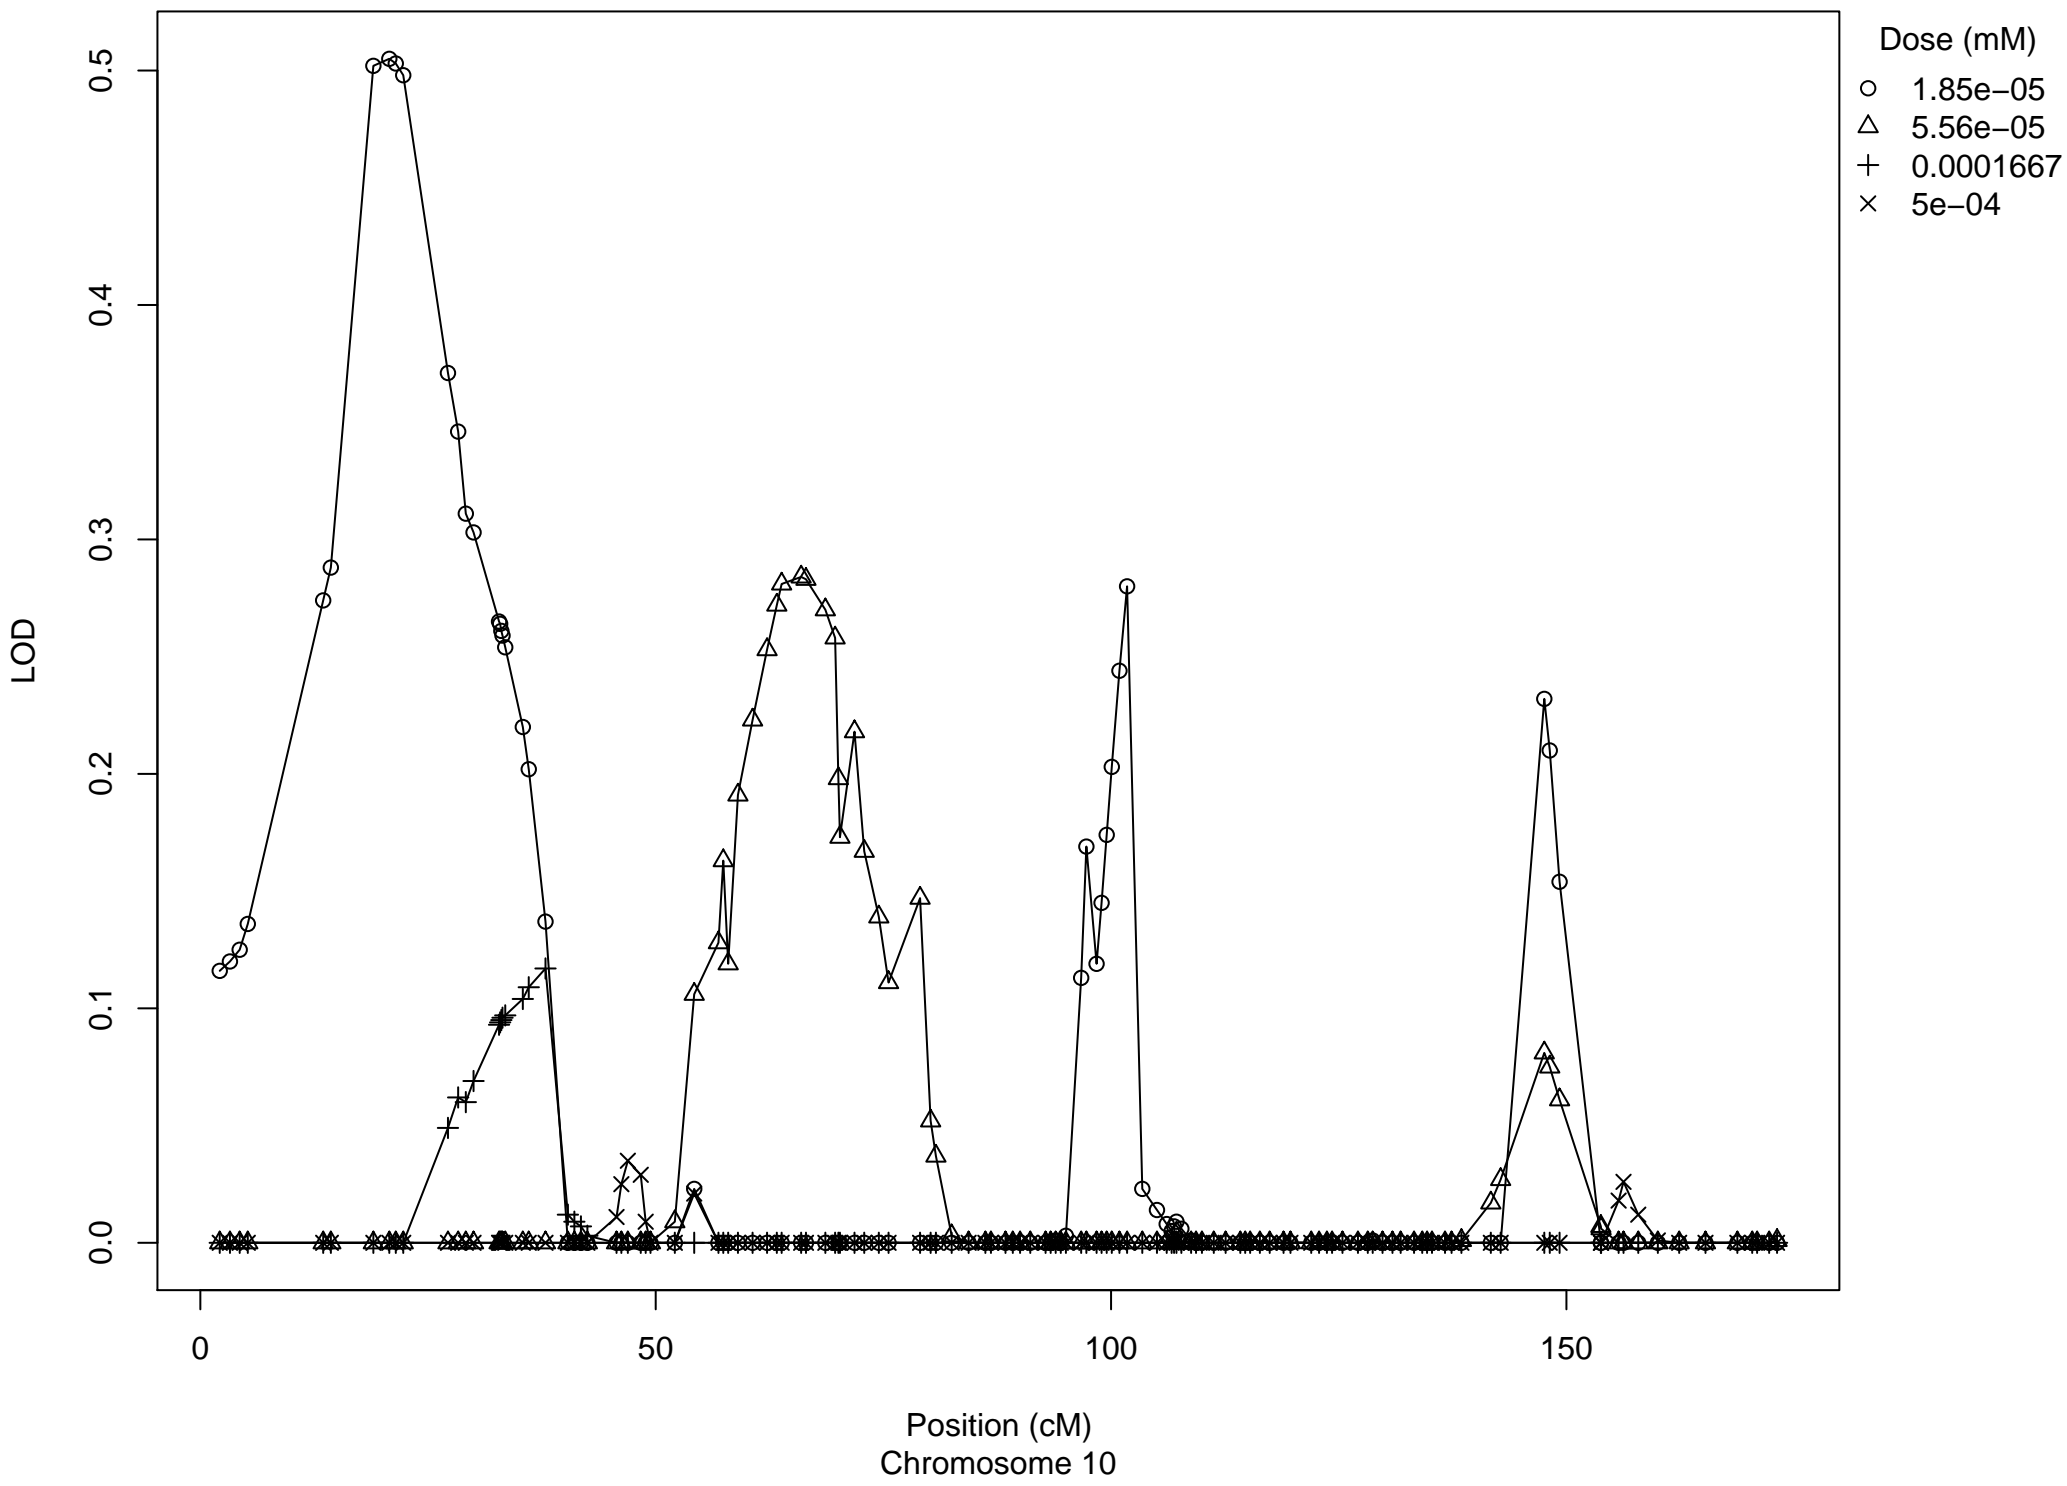



# Paclitaxel from Taxus Yunnanensis (Pac)

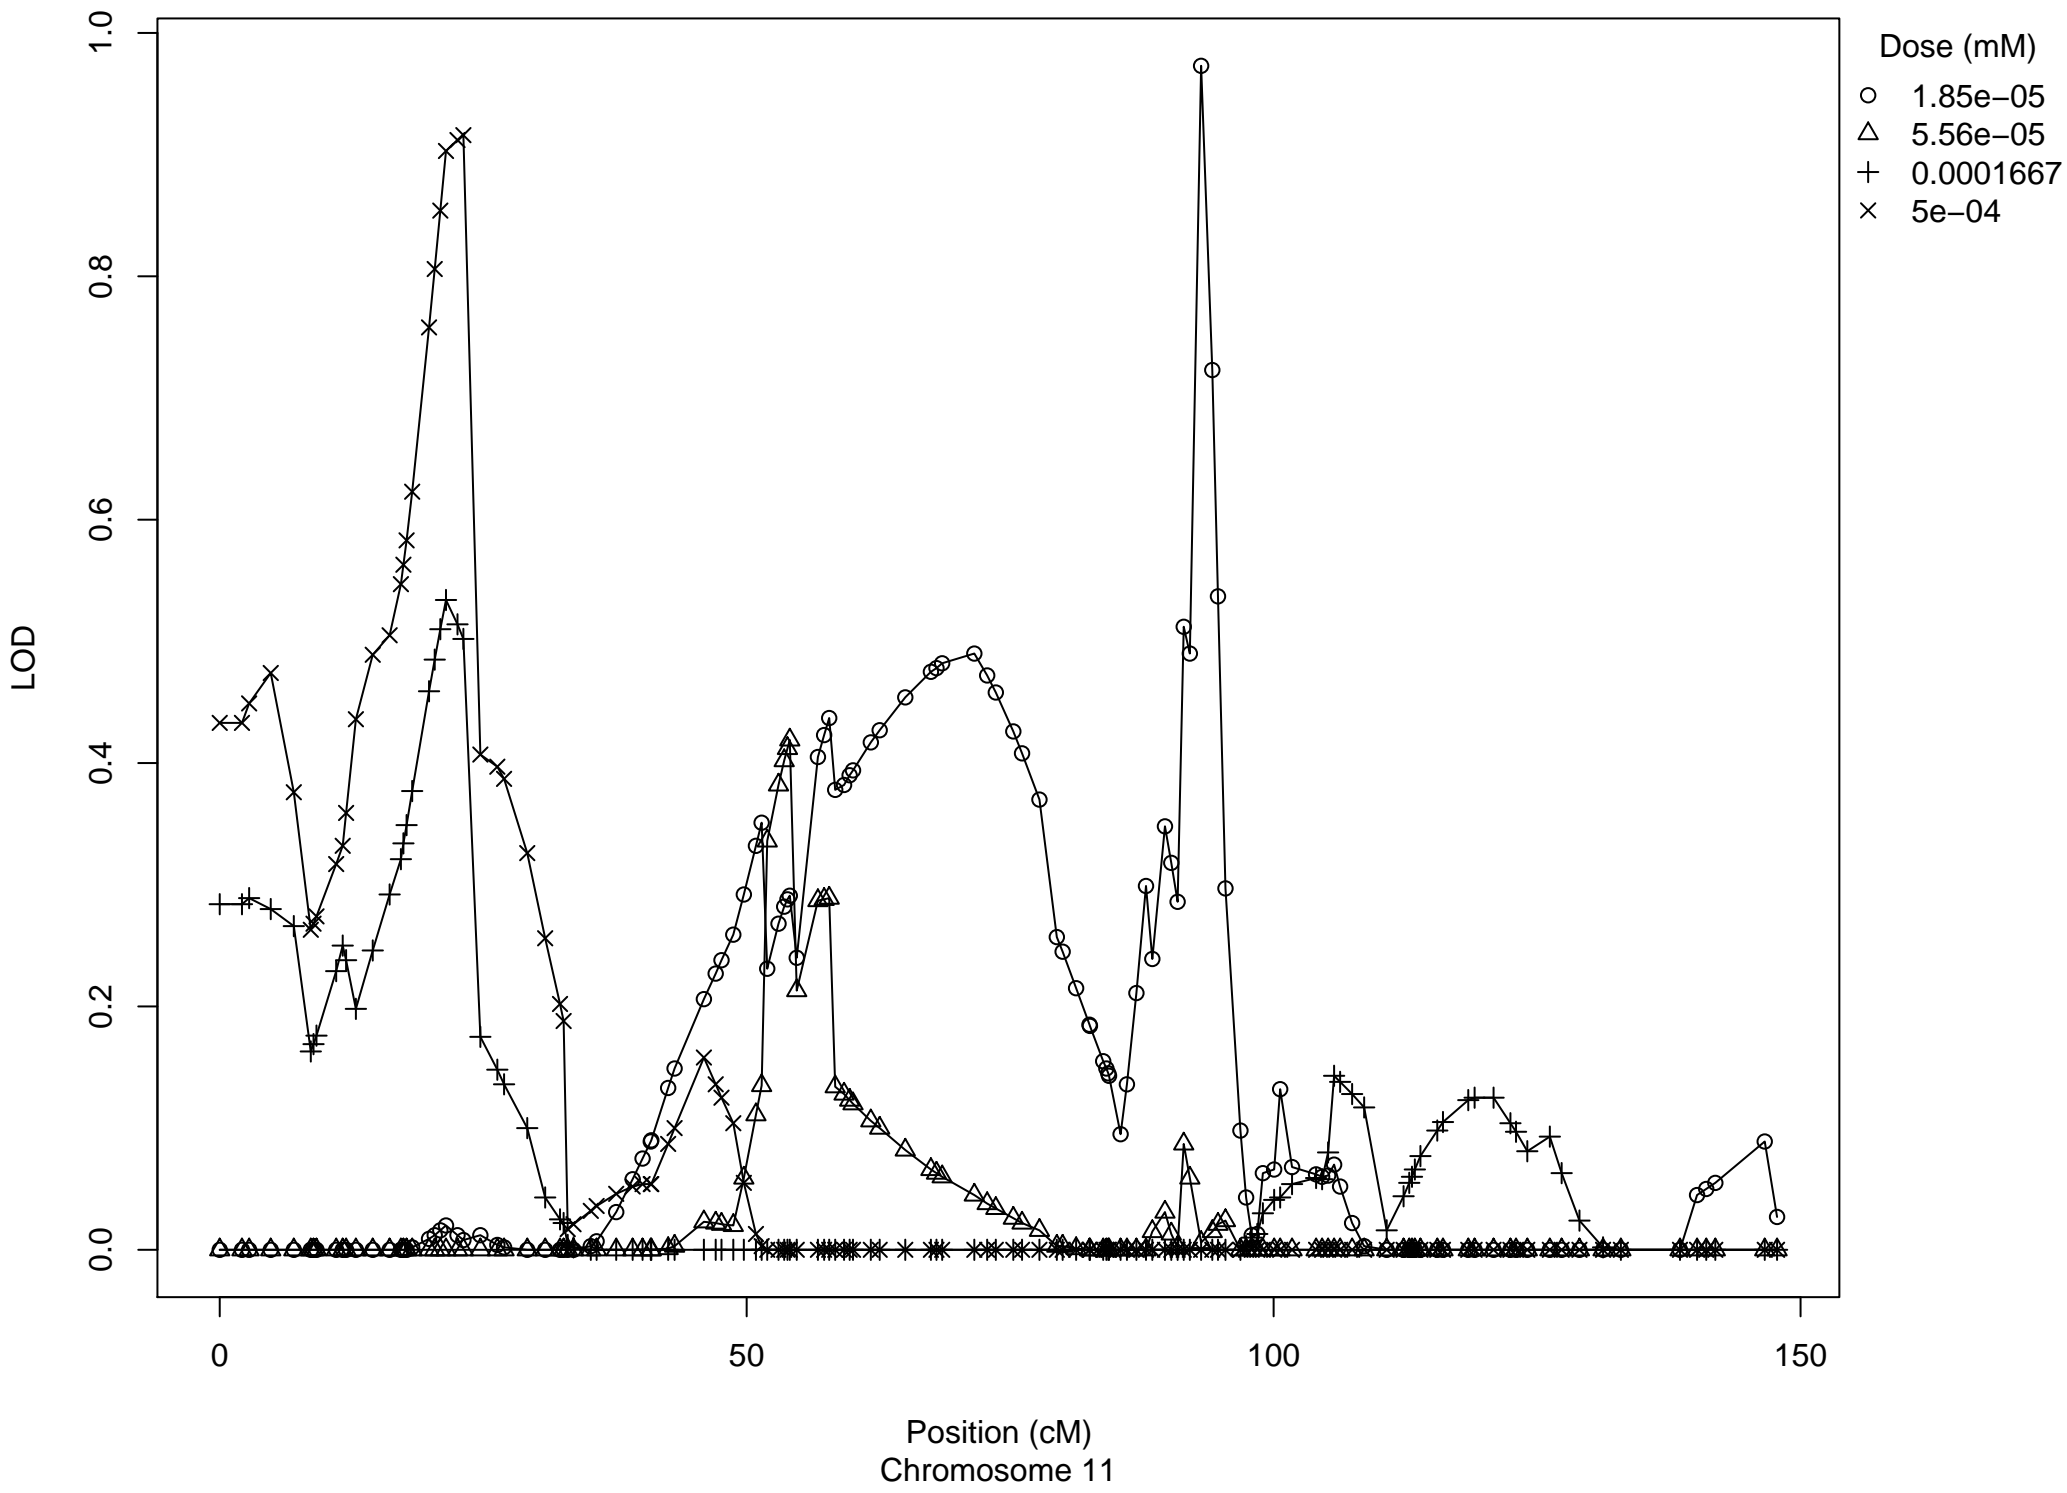

# Paclitaxel from *Taxus Yunnanensis* (Pac)

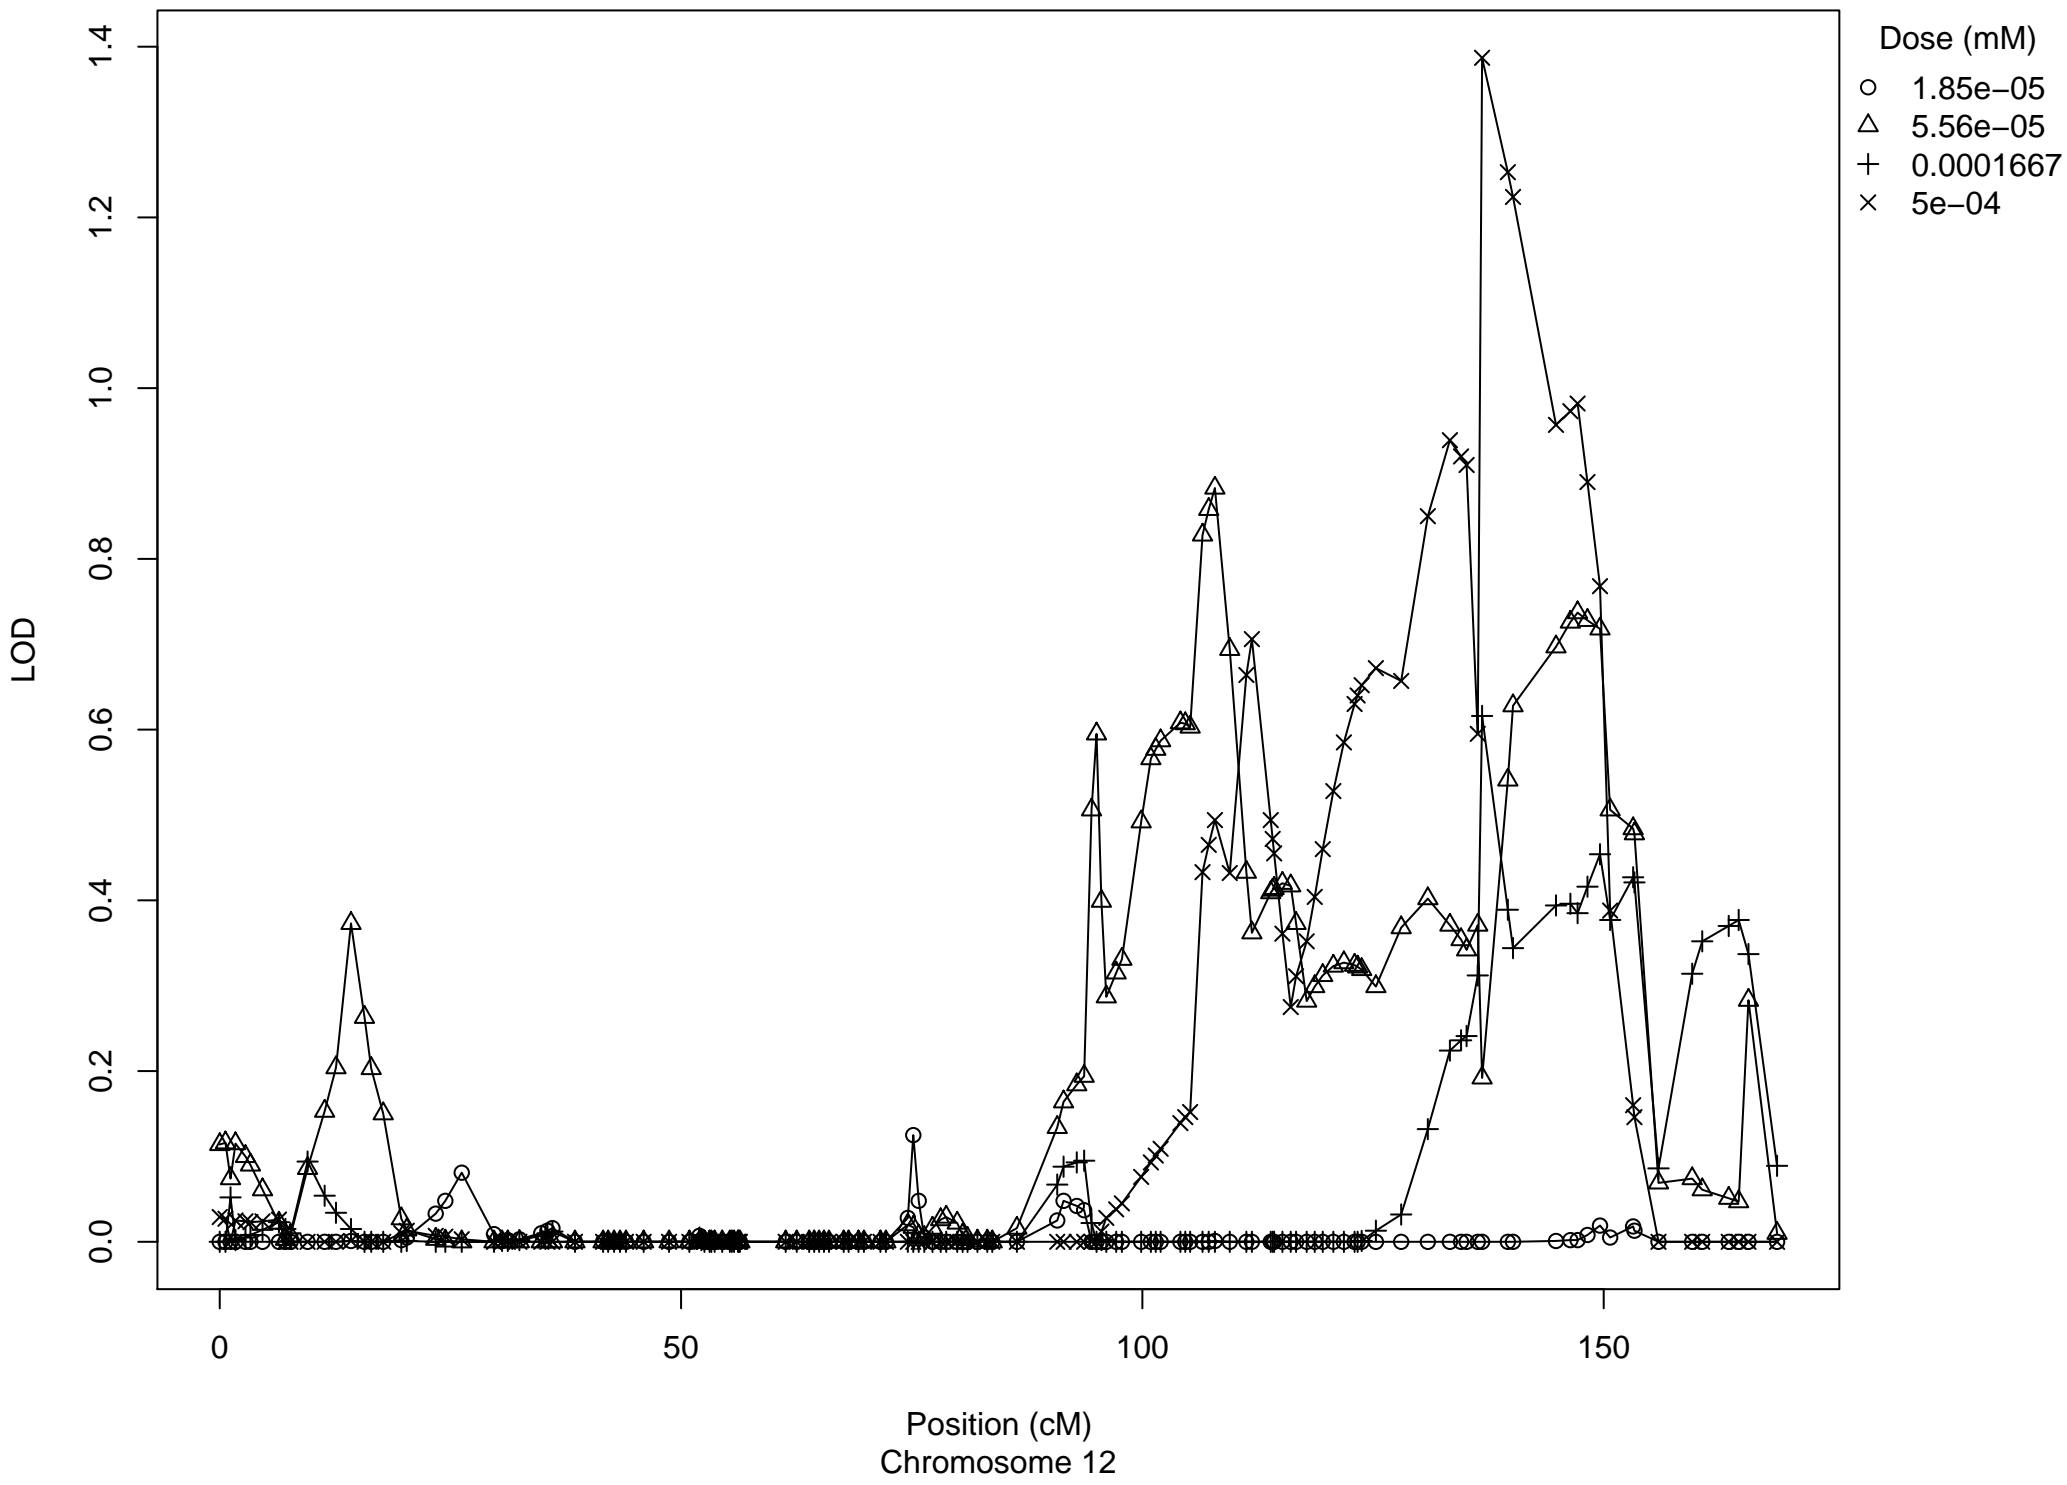

# Paclitaxel from *Taxus Yunnanensis* (Pac)

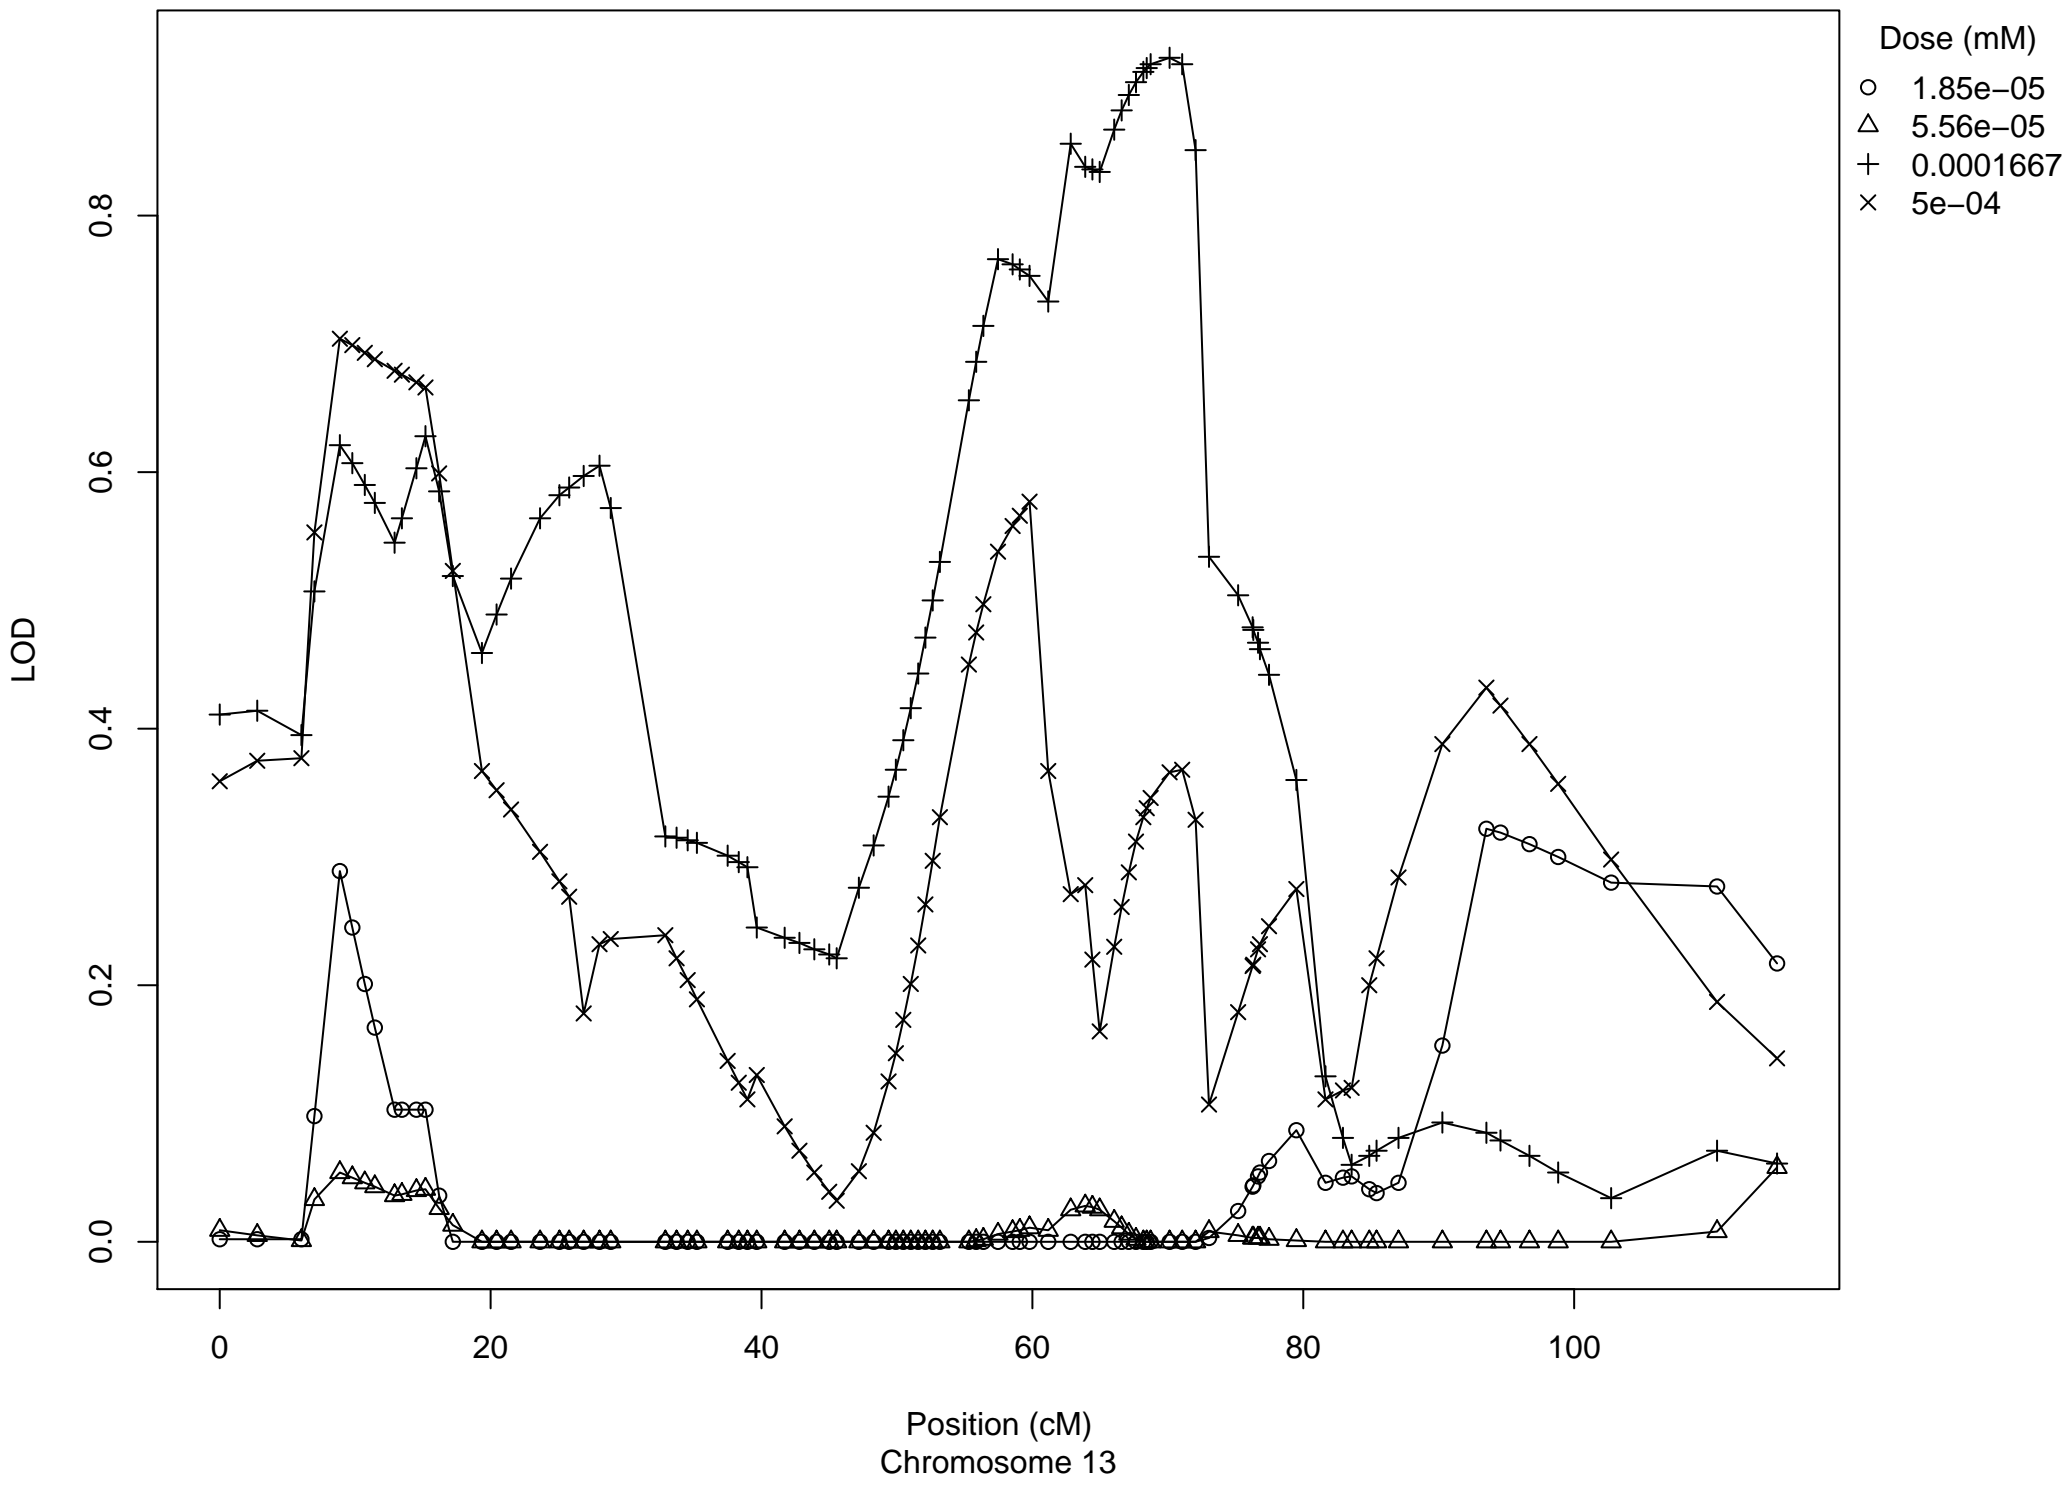

# Paclitaxel from Taxus Yunnanensis (Pac)

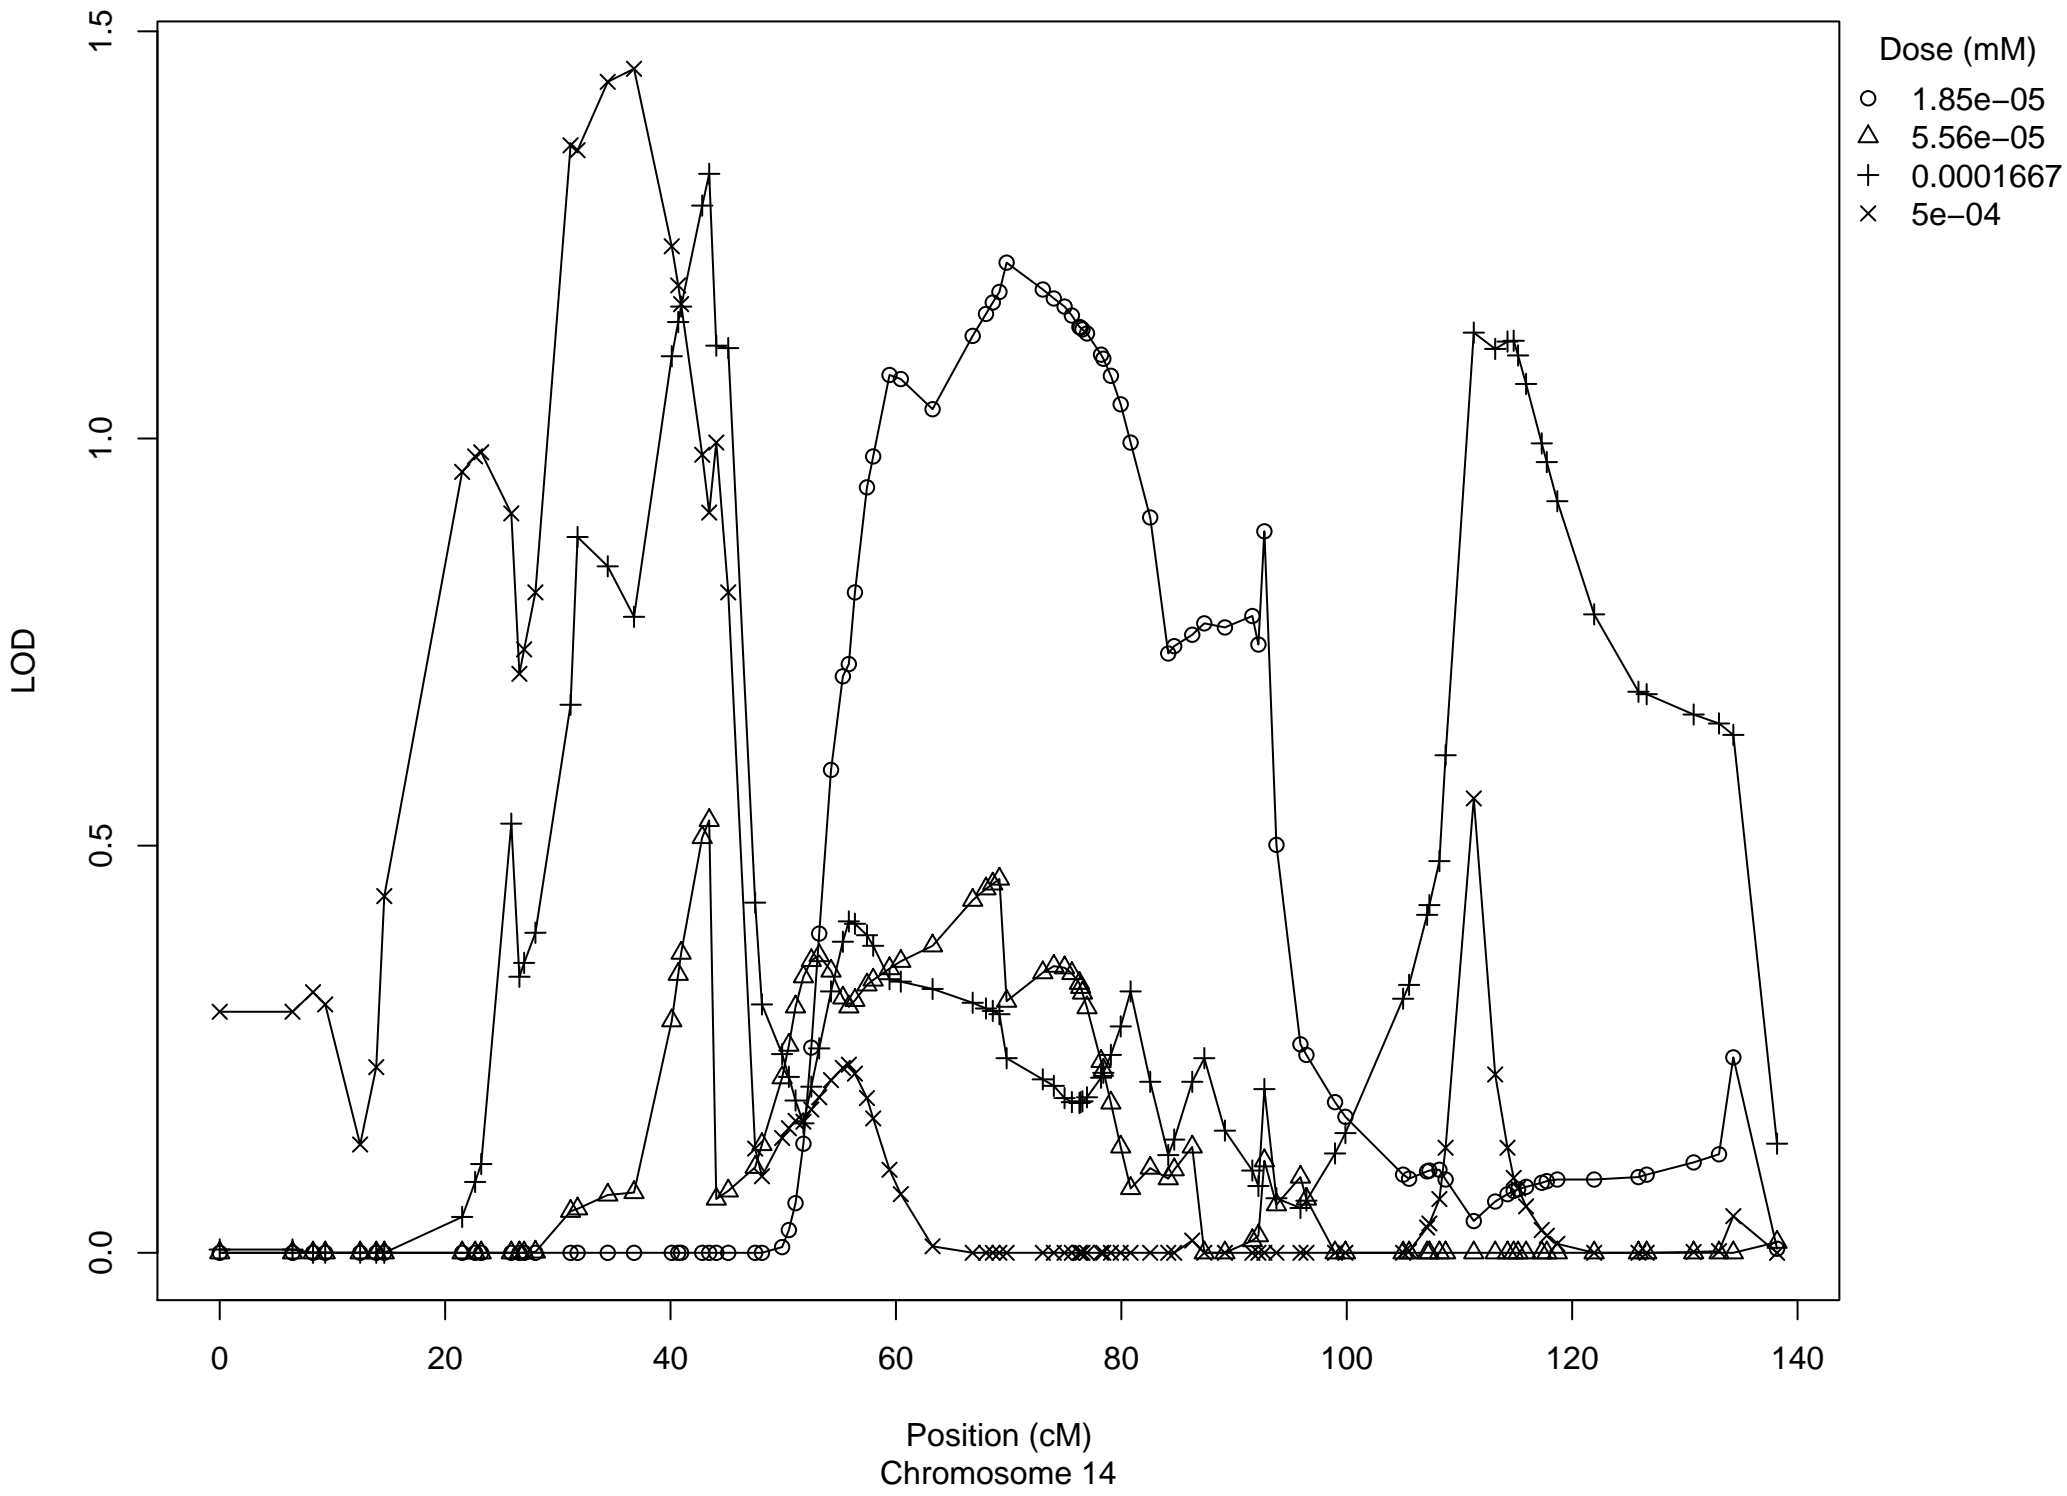

# Paclitaxel from *Taxus Yunnanensis* (Pac)

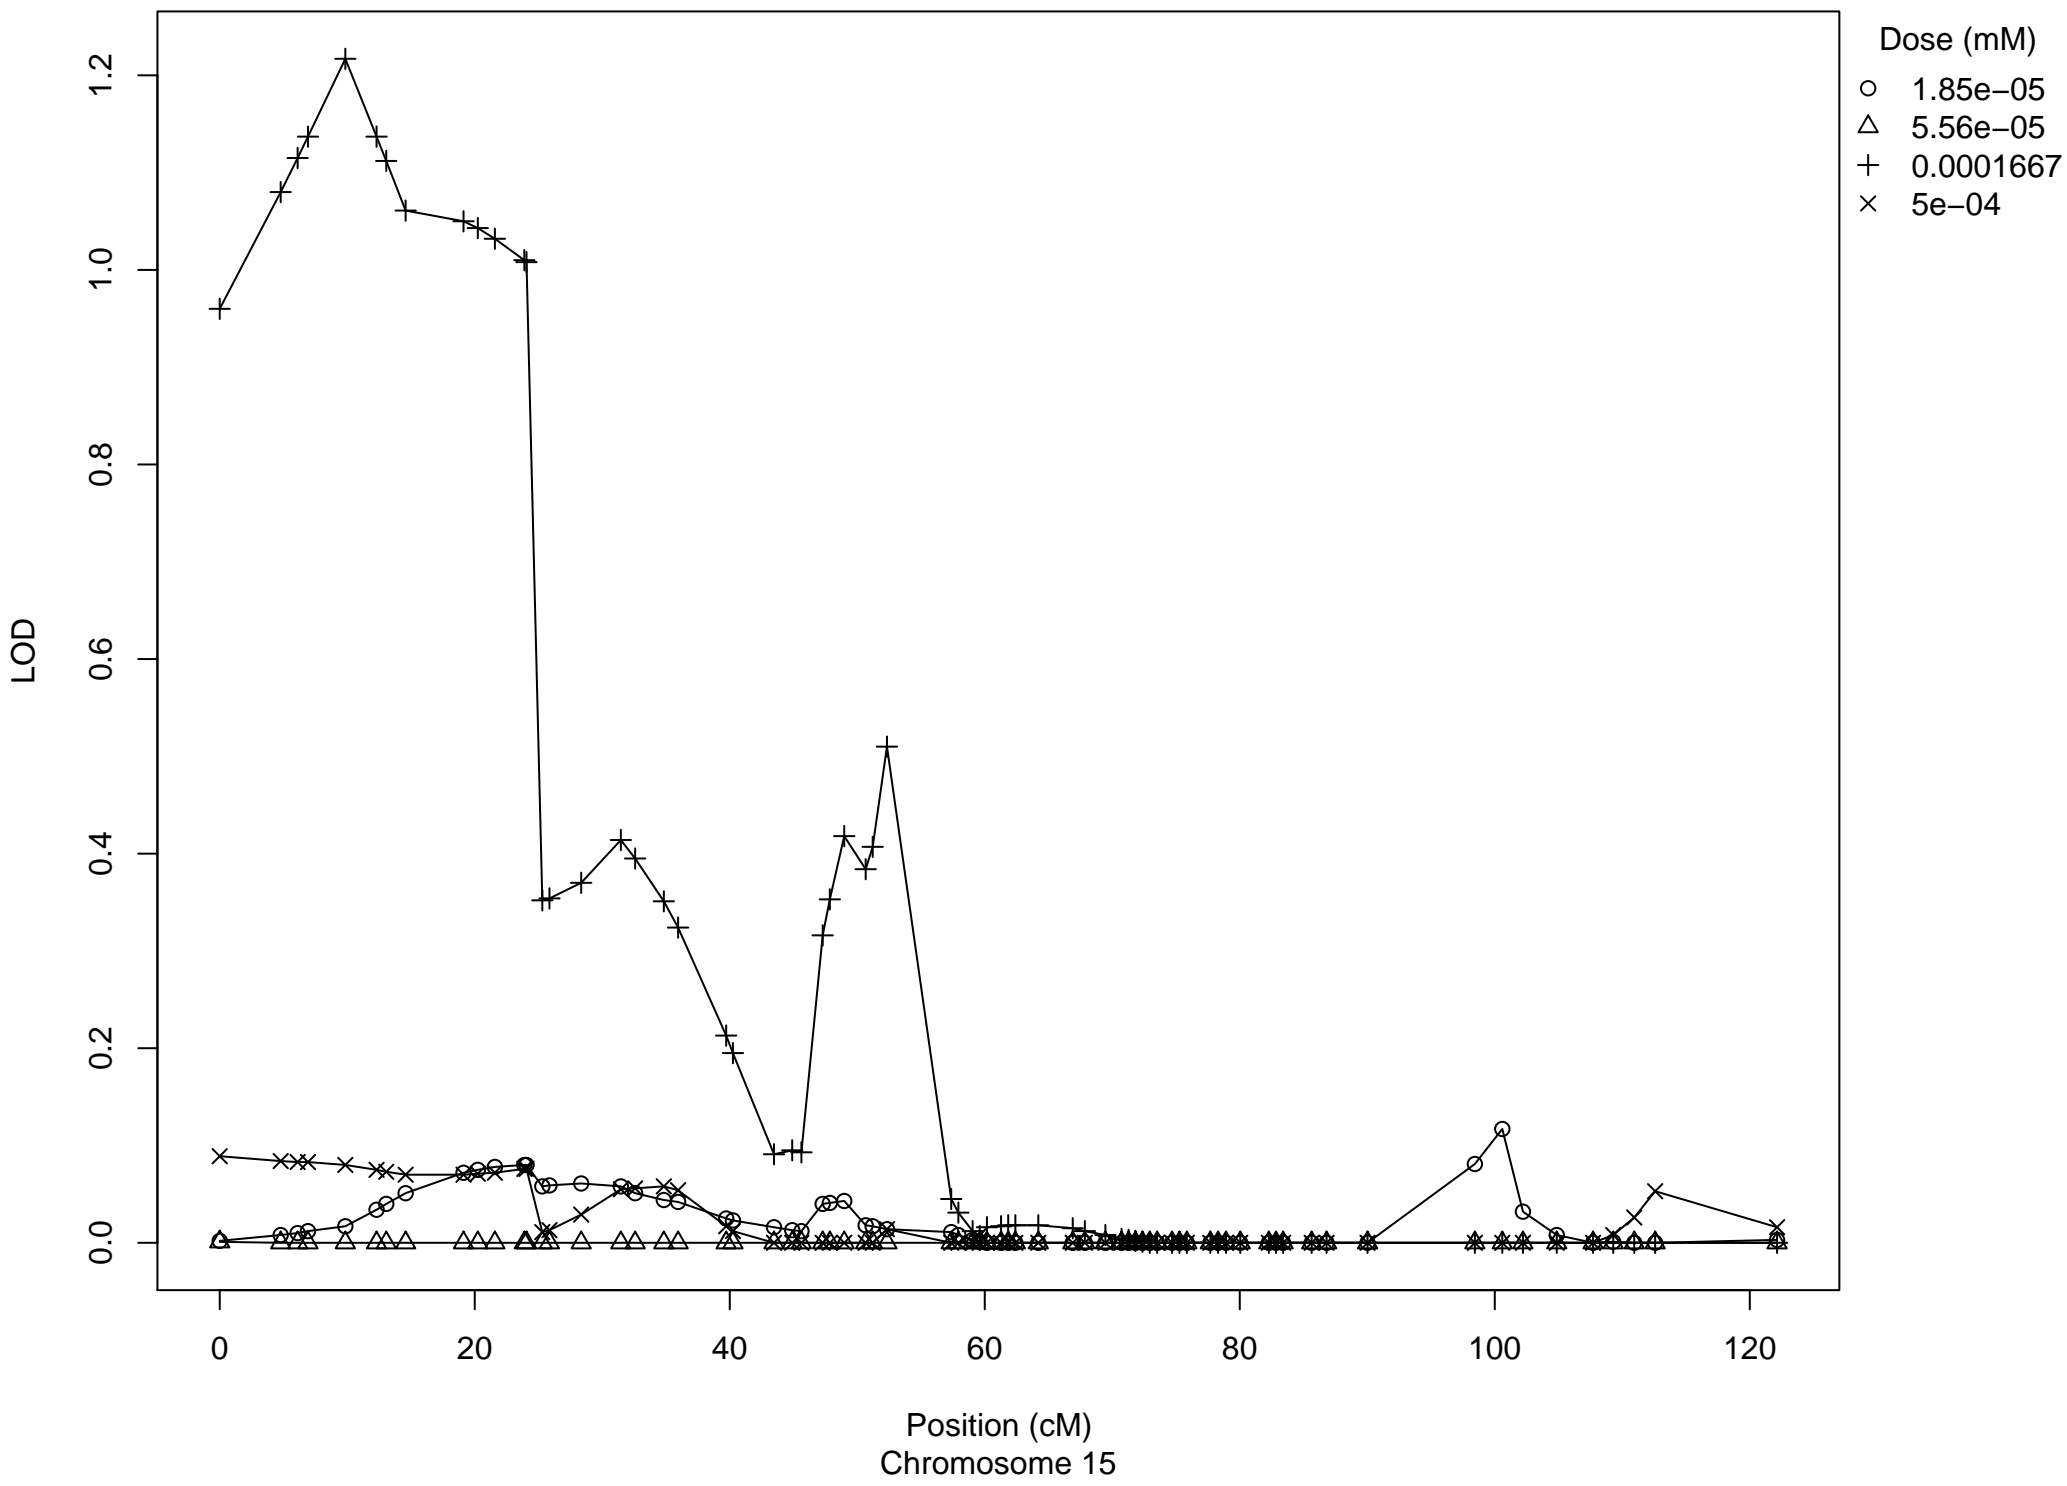

# Paclitaxel from *Taxus Yunnanensis* (Pac)

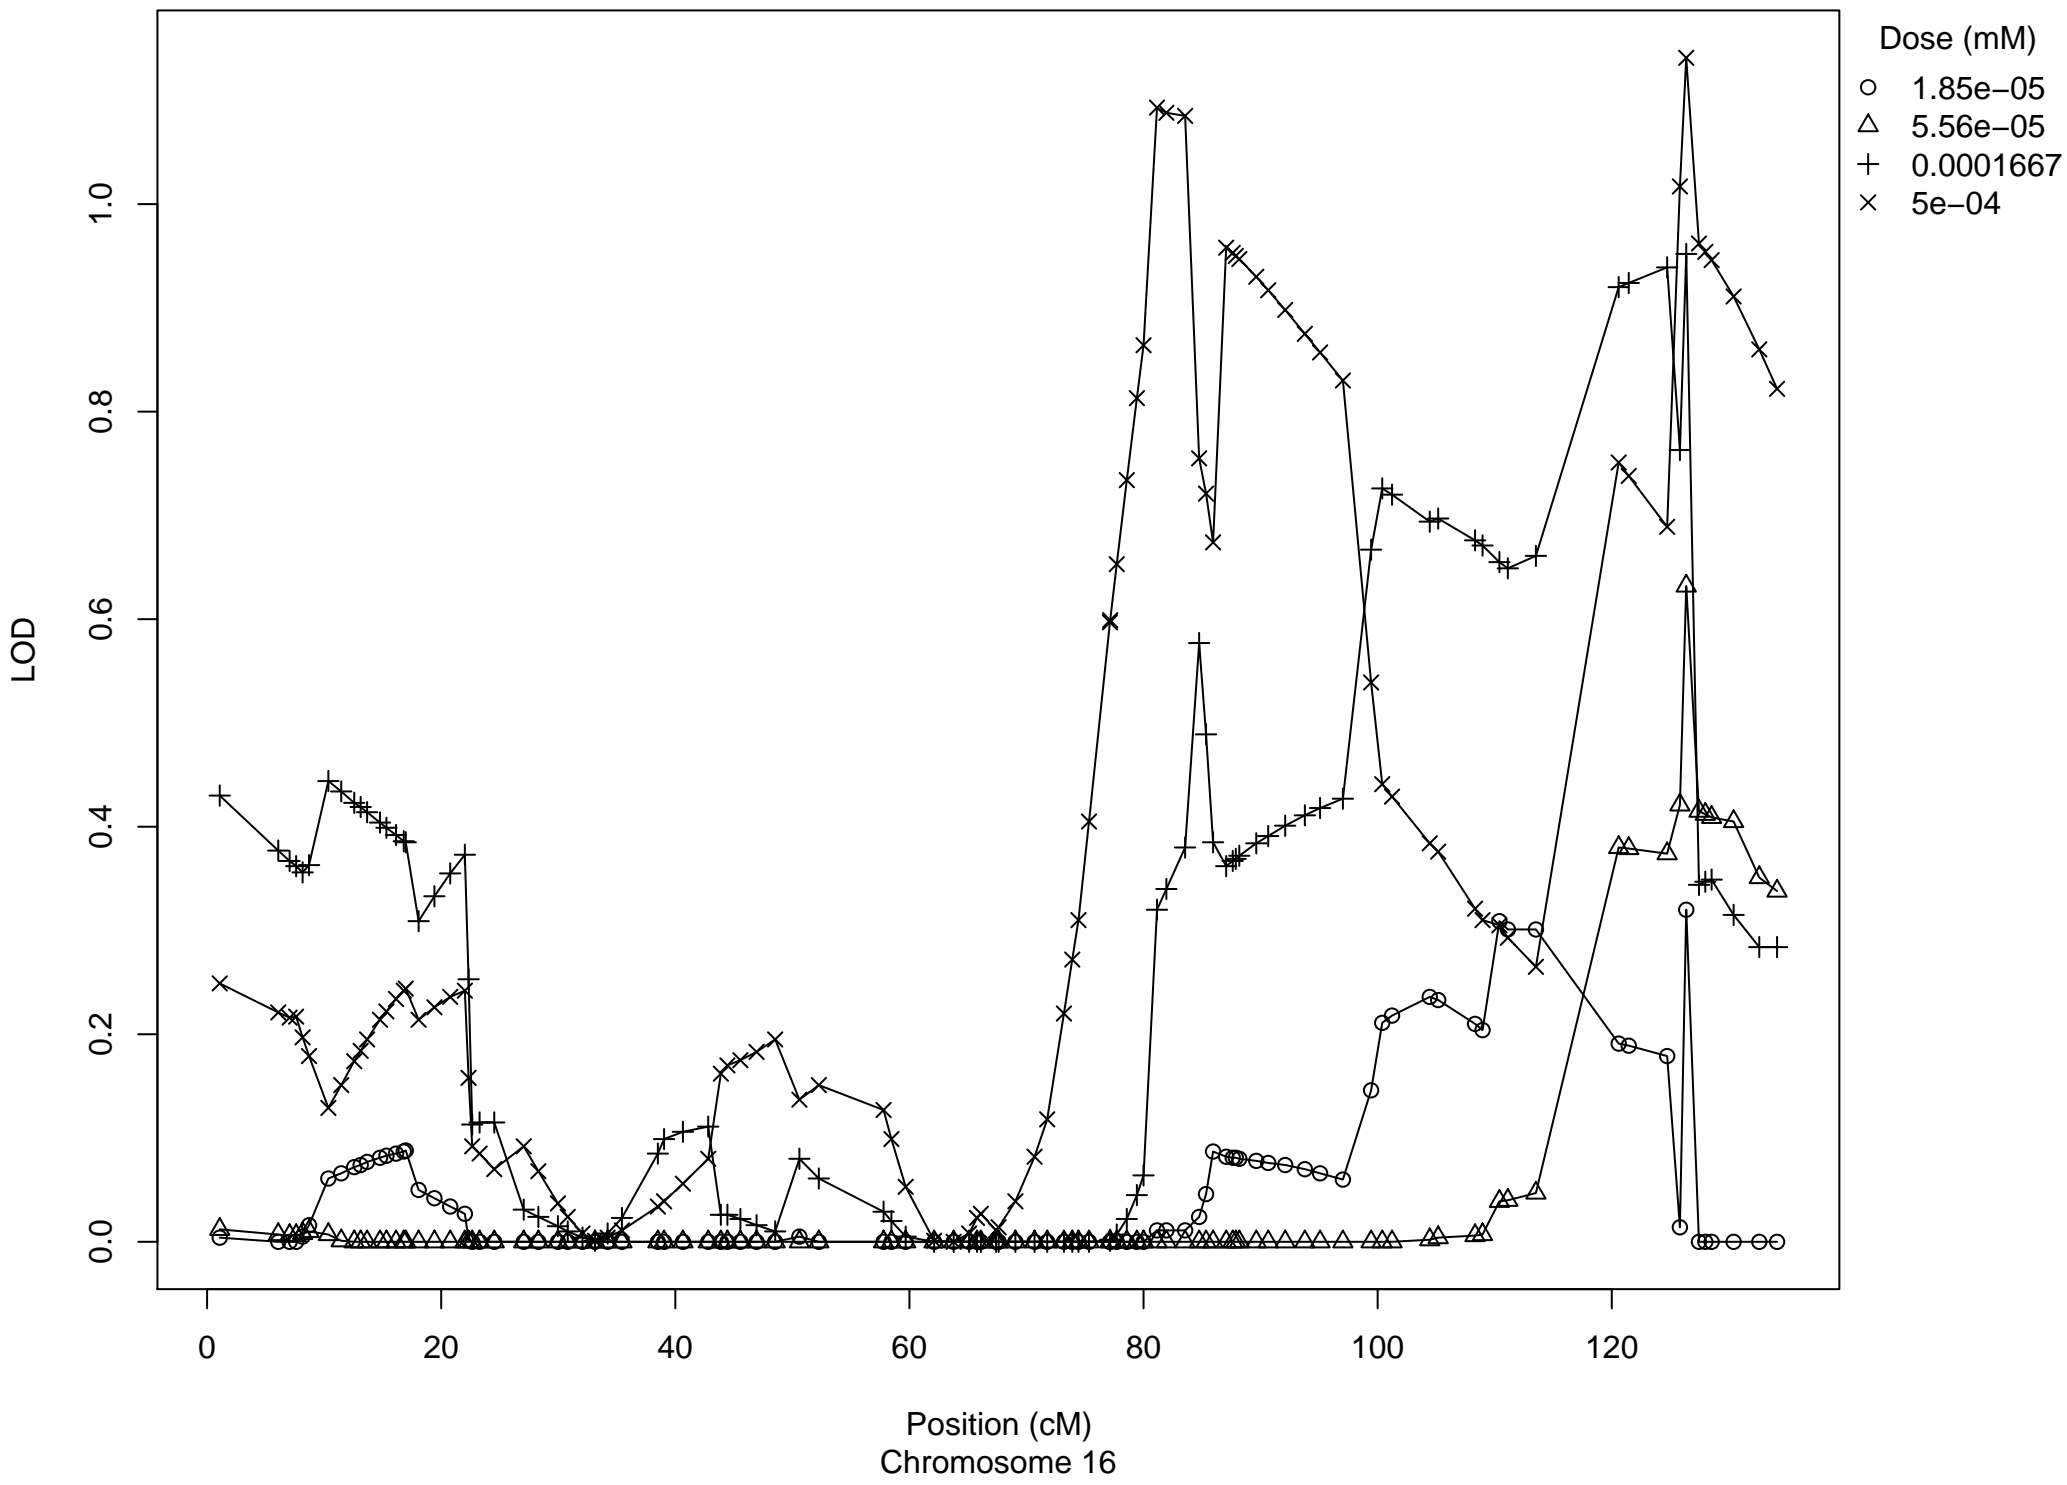

# Paclitaxel from *Taxus Yunnanensis* (Pac)

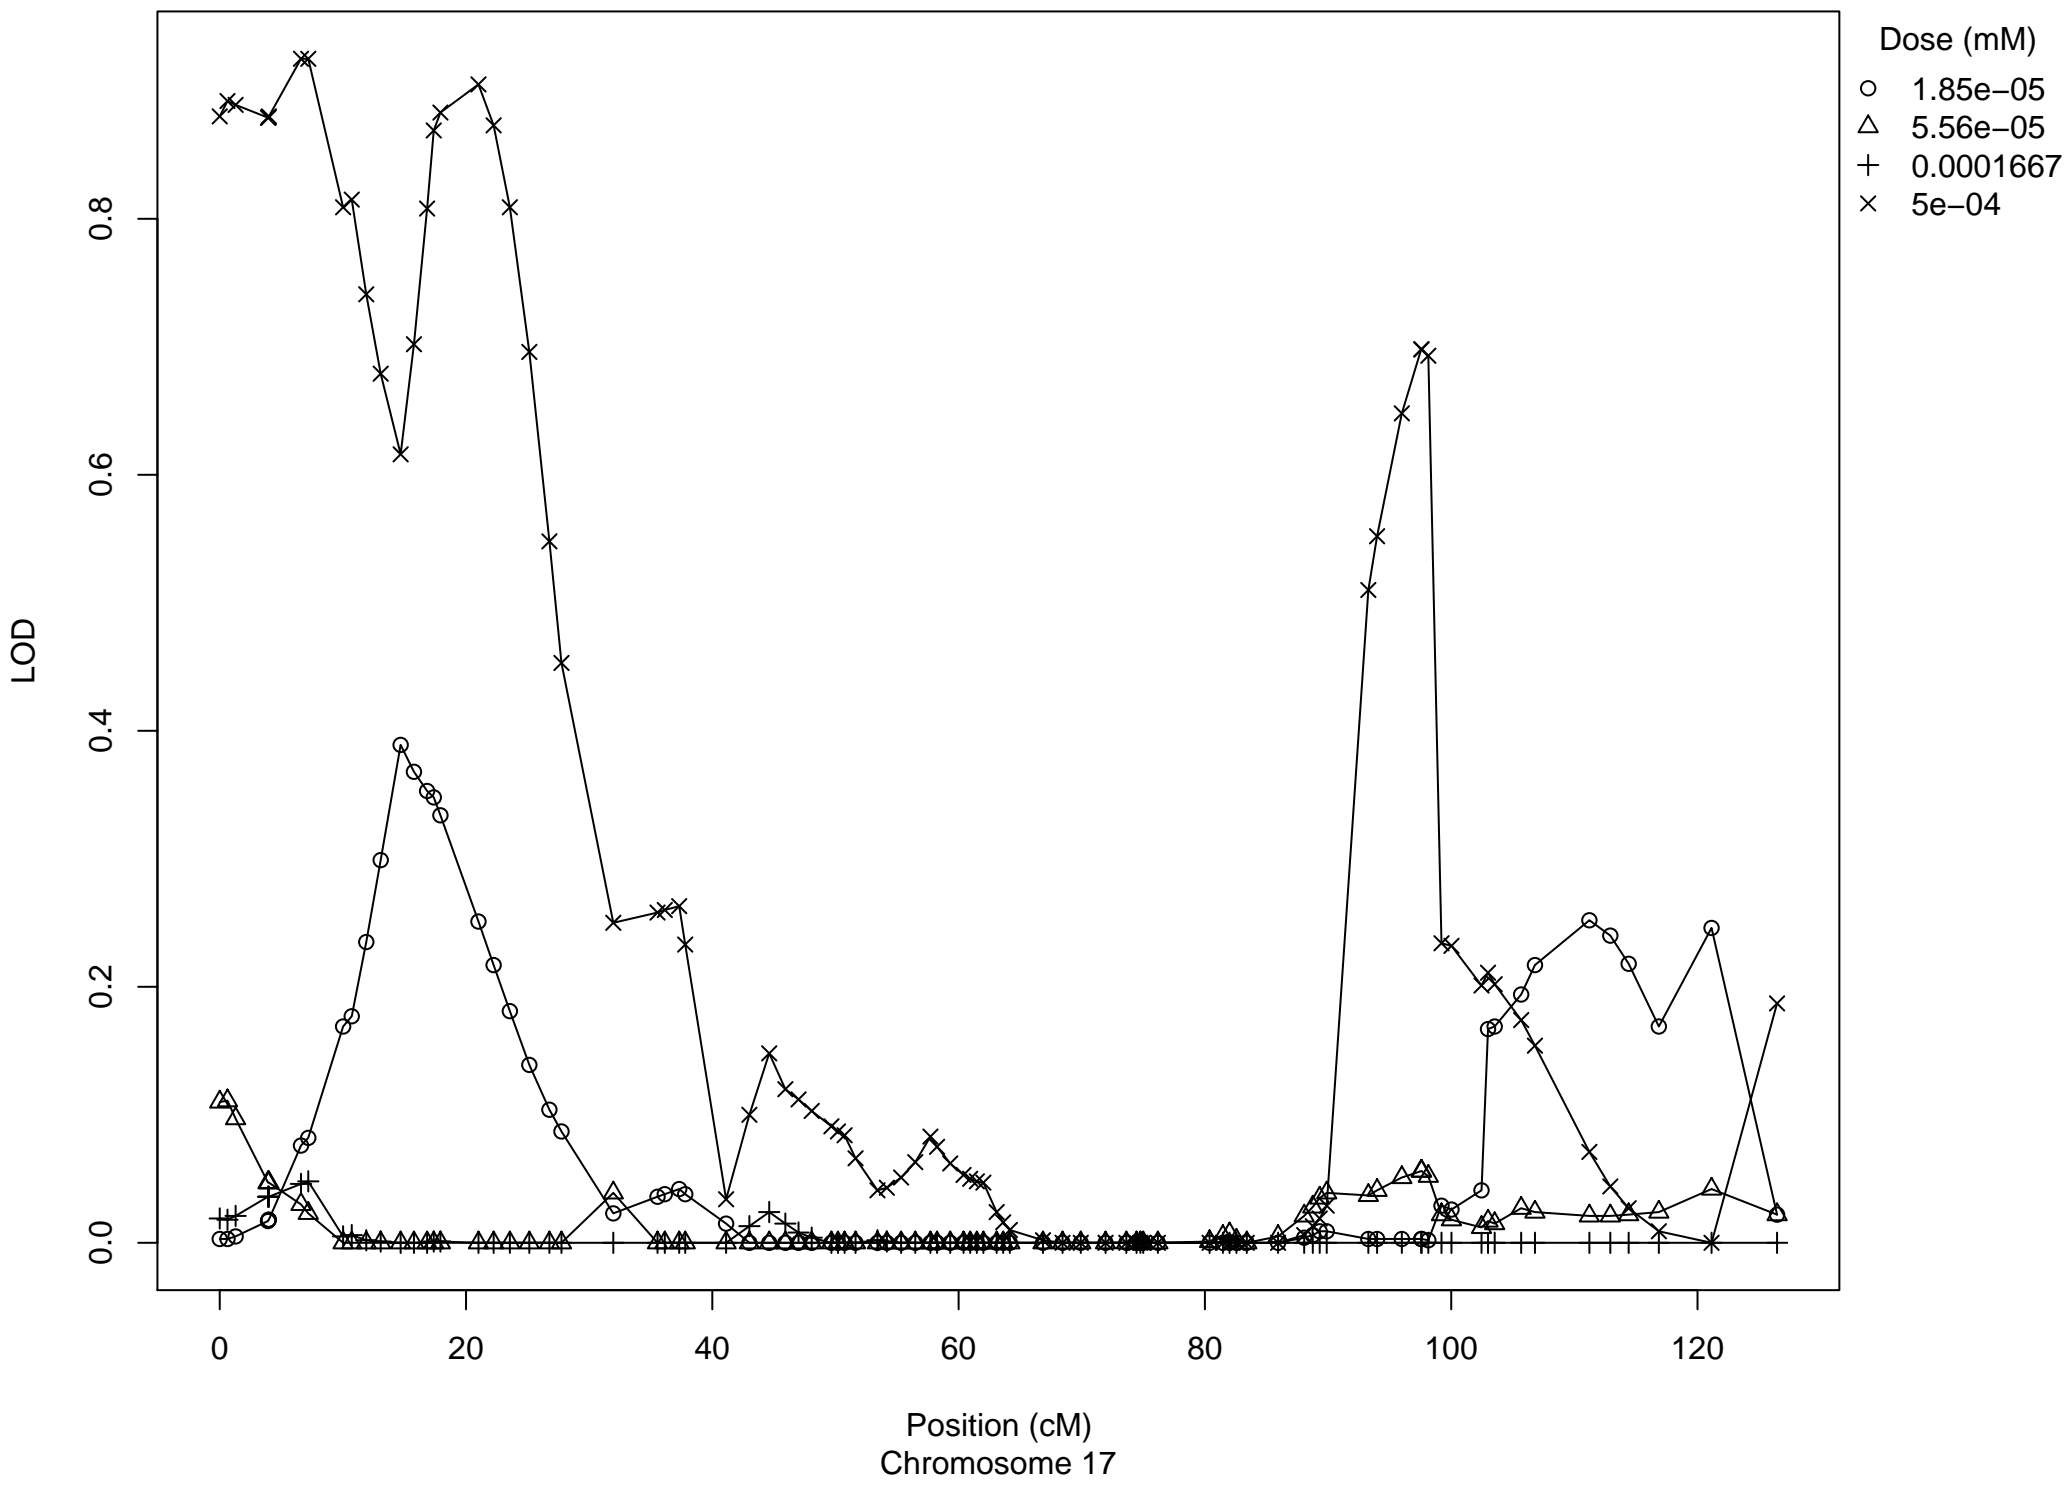

# Paclitaxel from *Taxus Yunnanensis* (Pac)

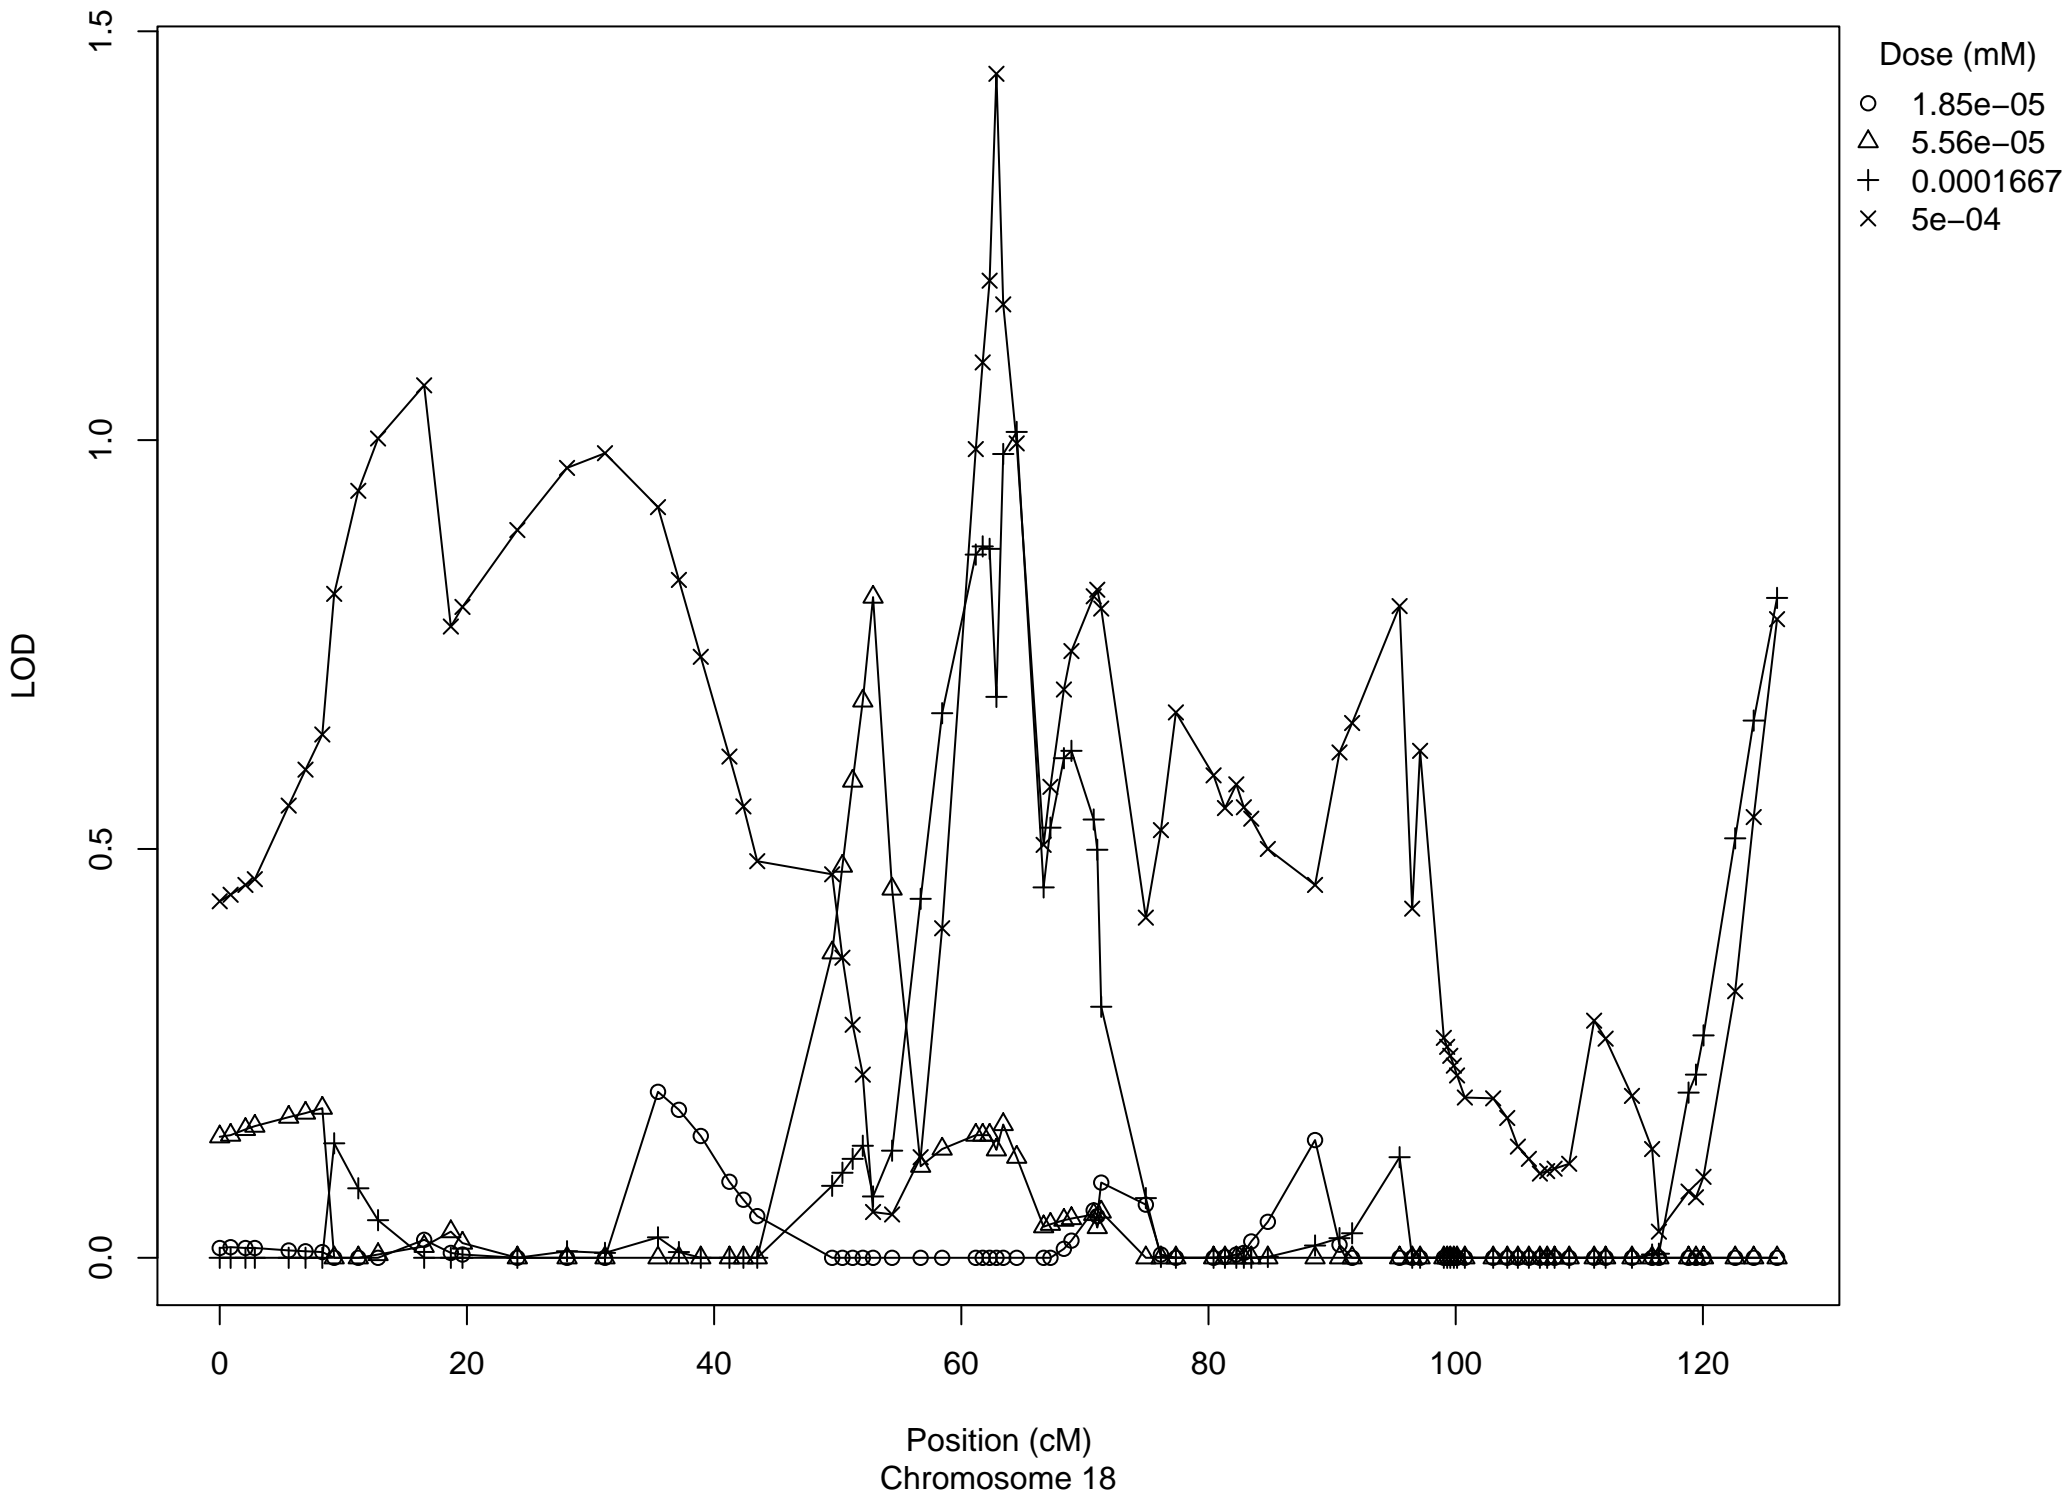



# Paclitaxel from *Taxus Yunnanensis* (Pac)

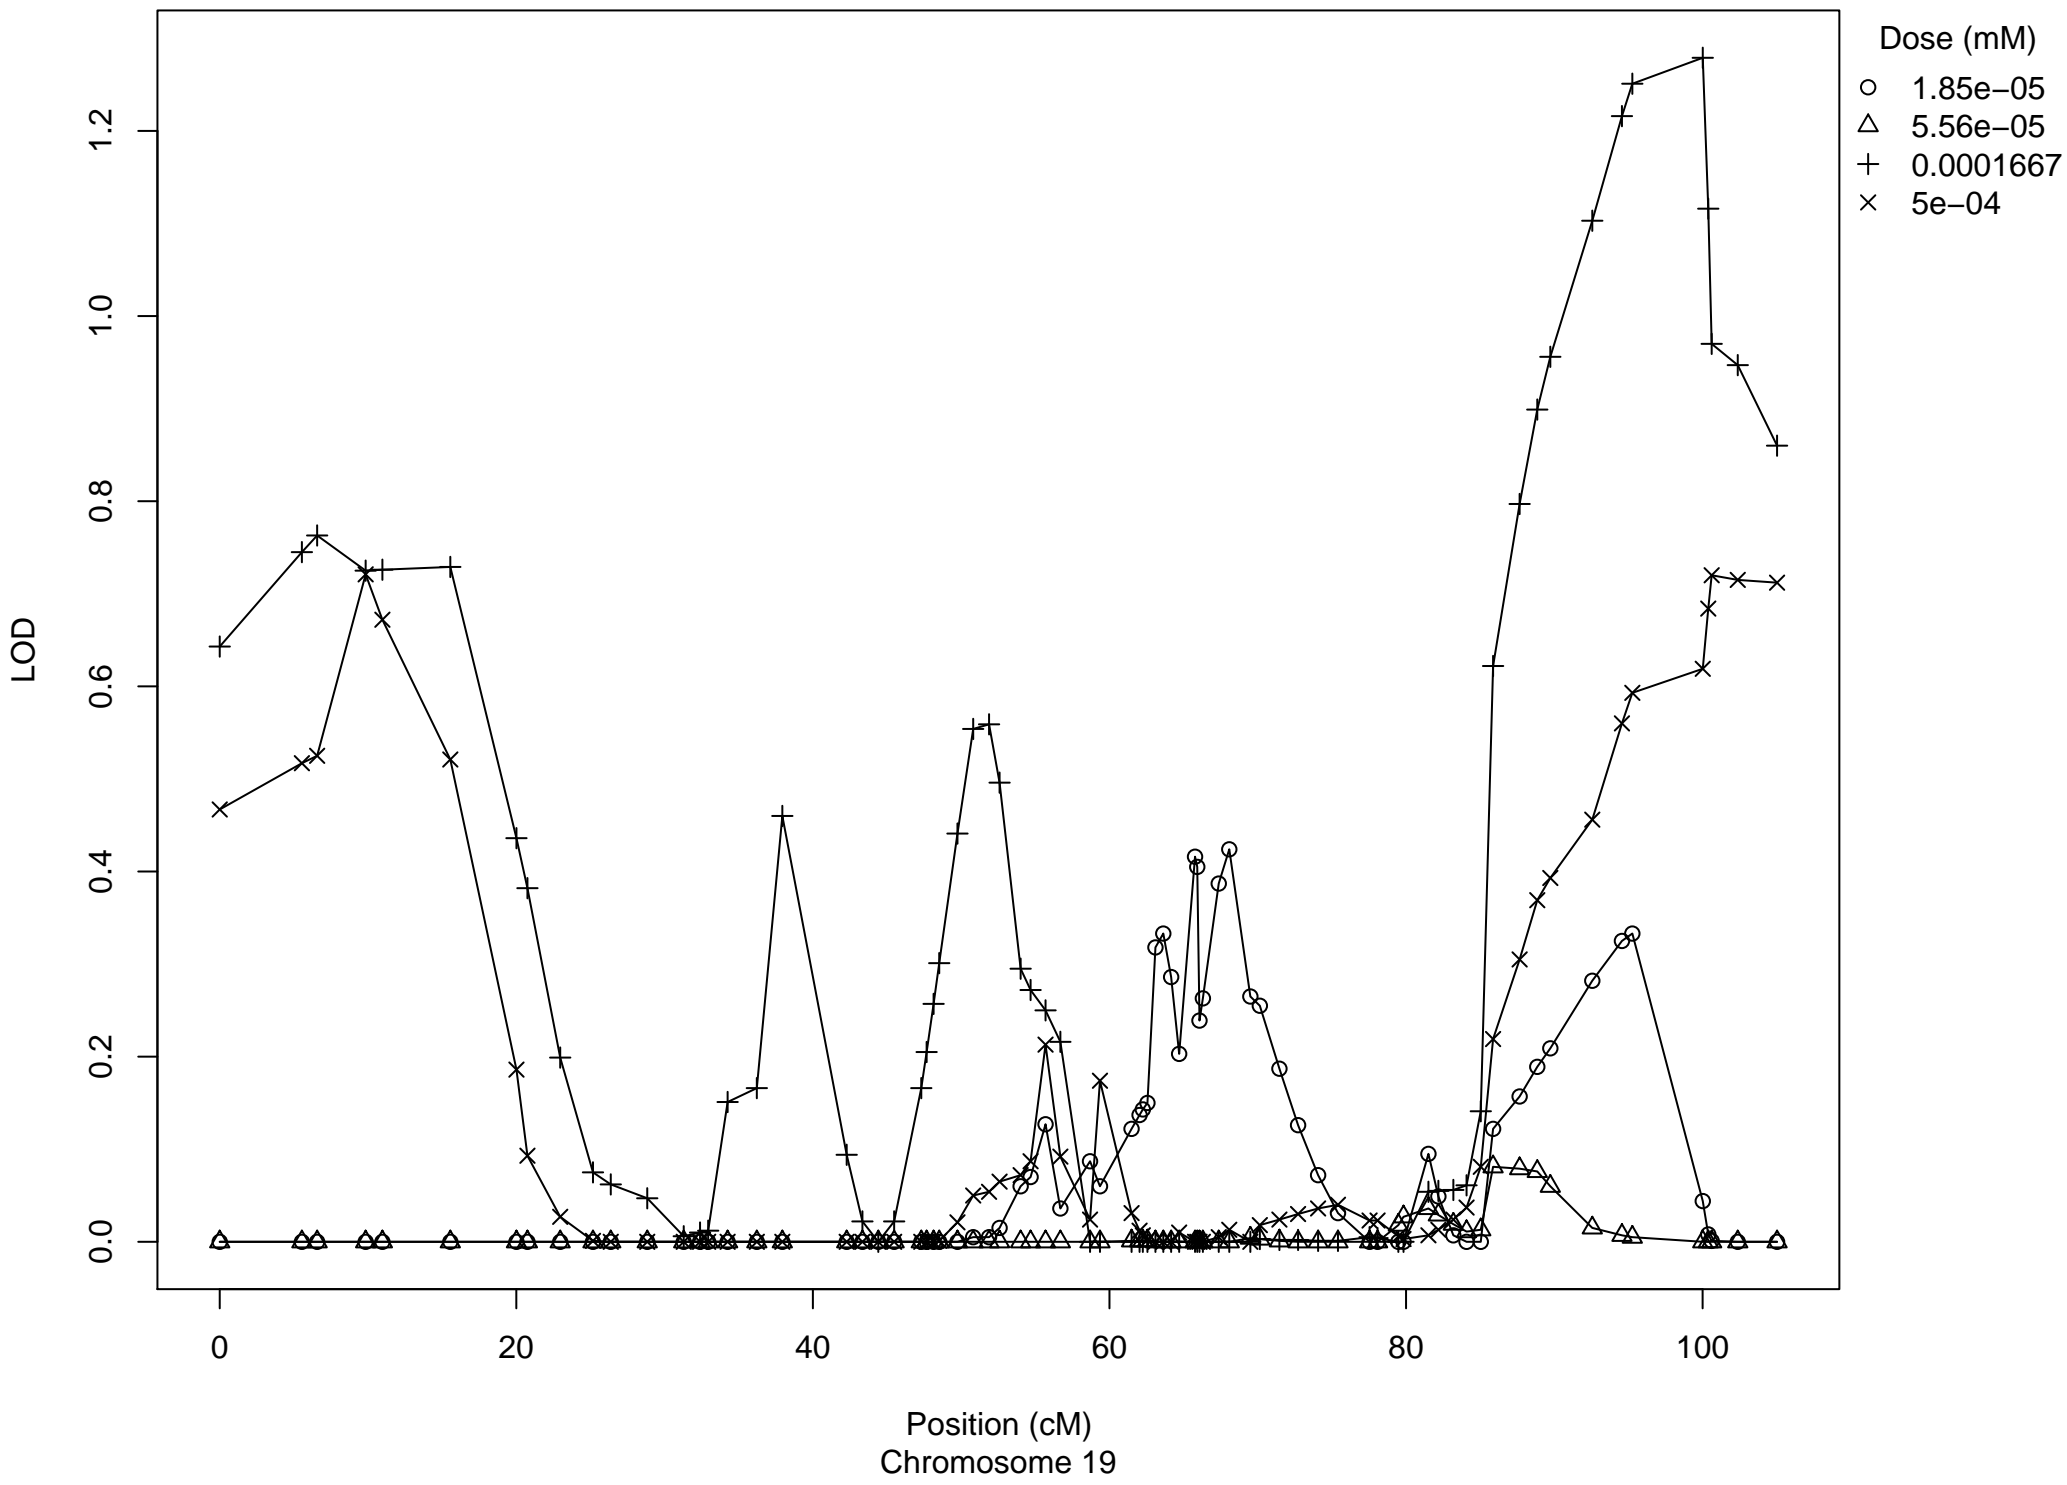

# Paclitaxel from *Taxus Yunnanensis* (Pac)

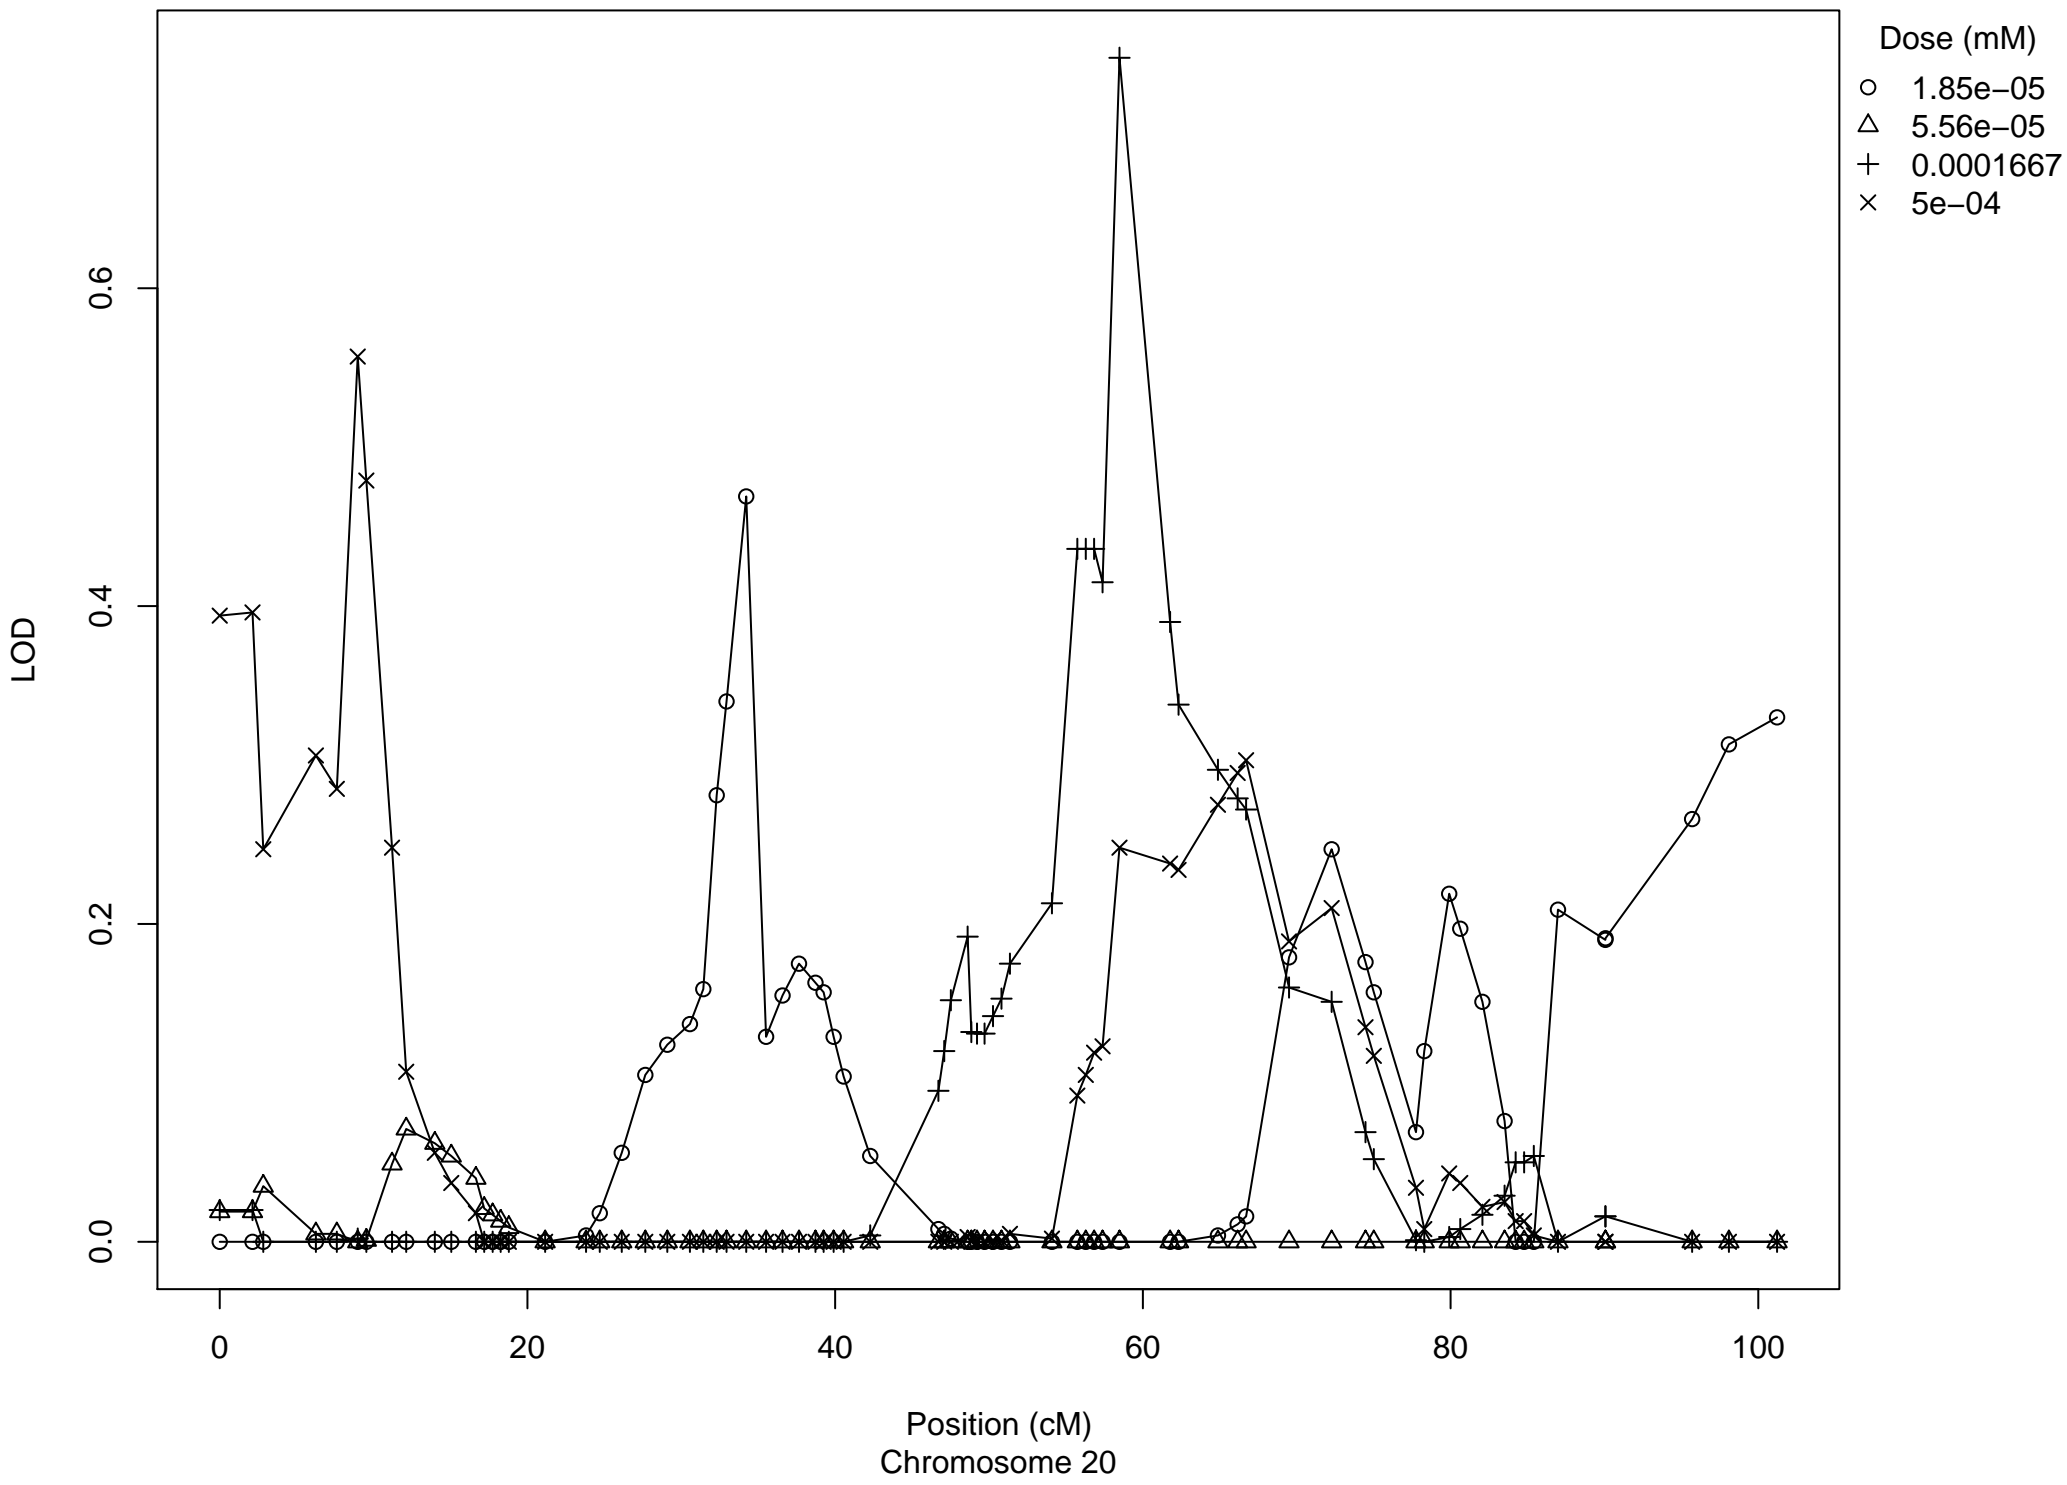

# Paclitaxel from Taxus Yunnanensis (Pac)

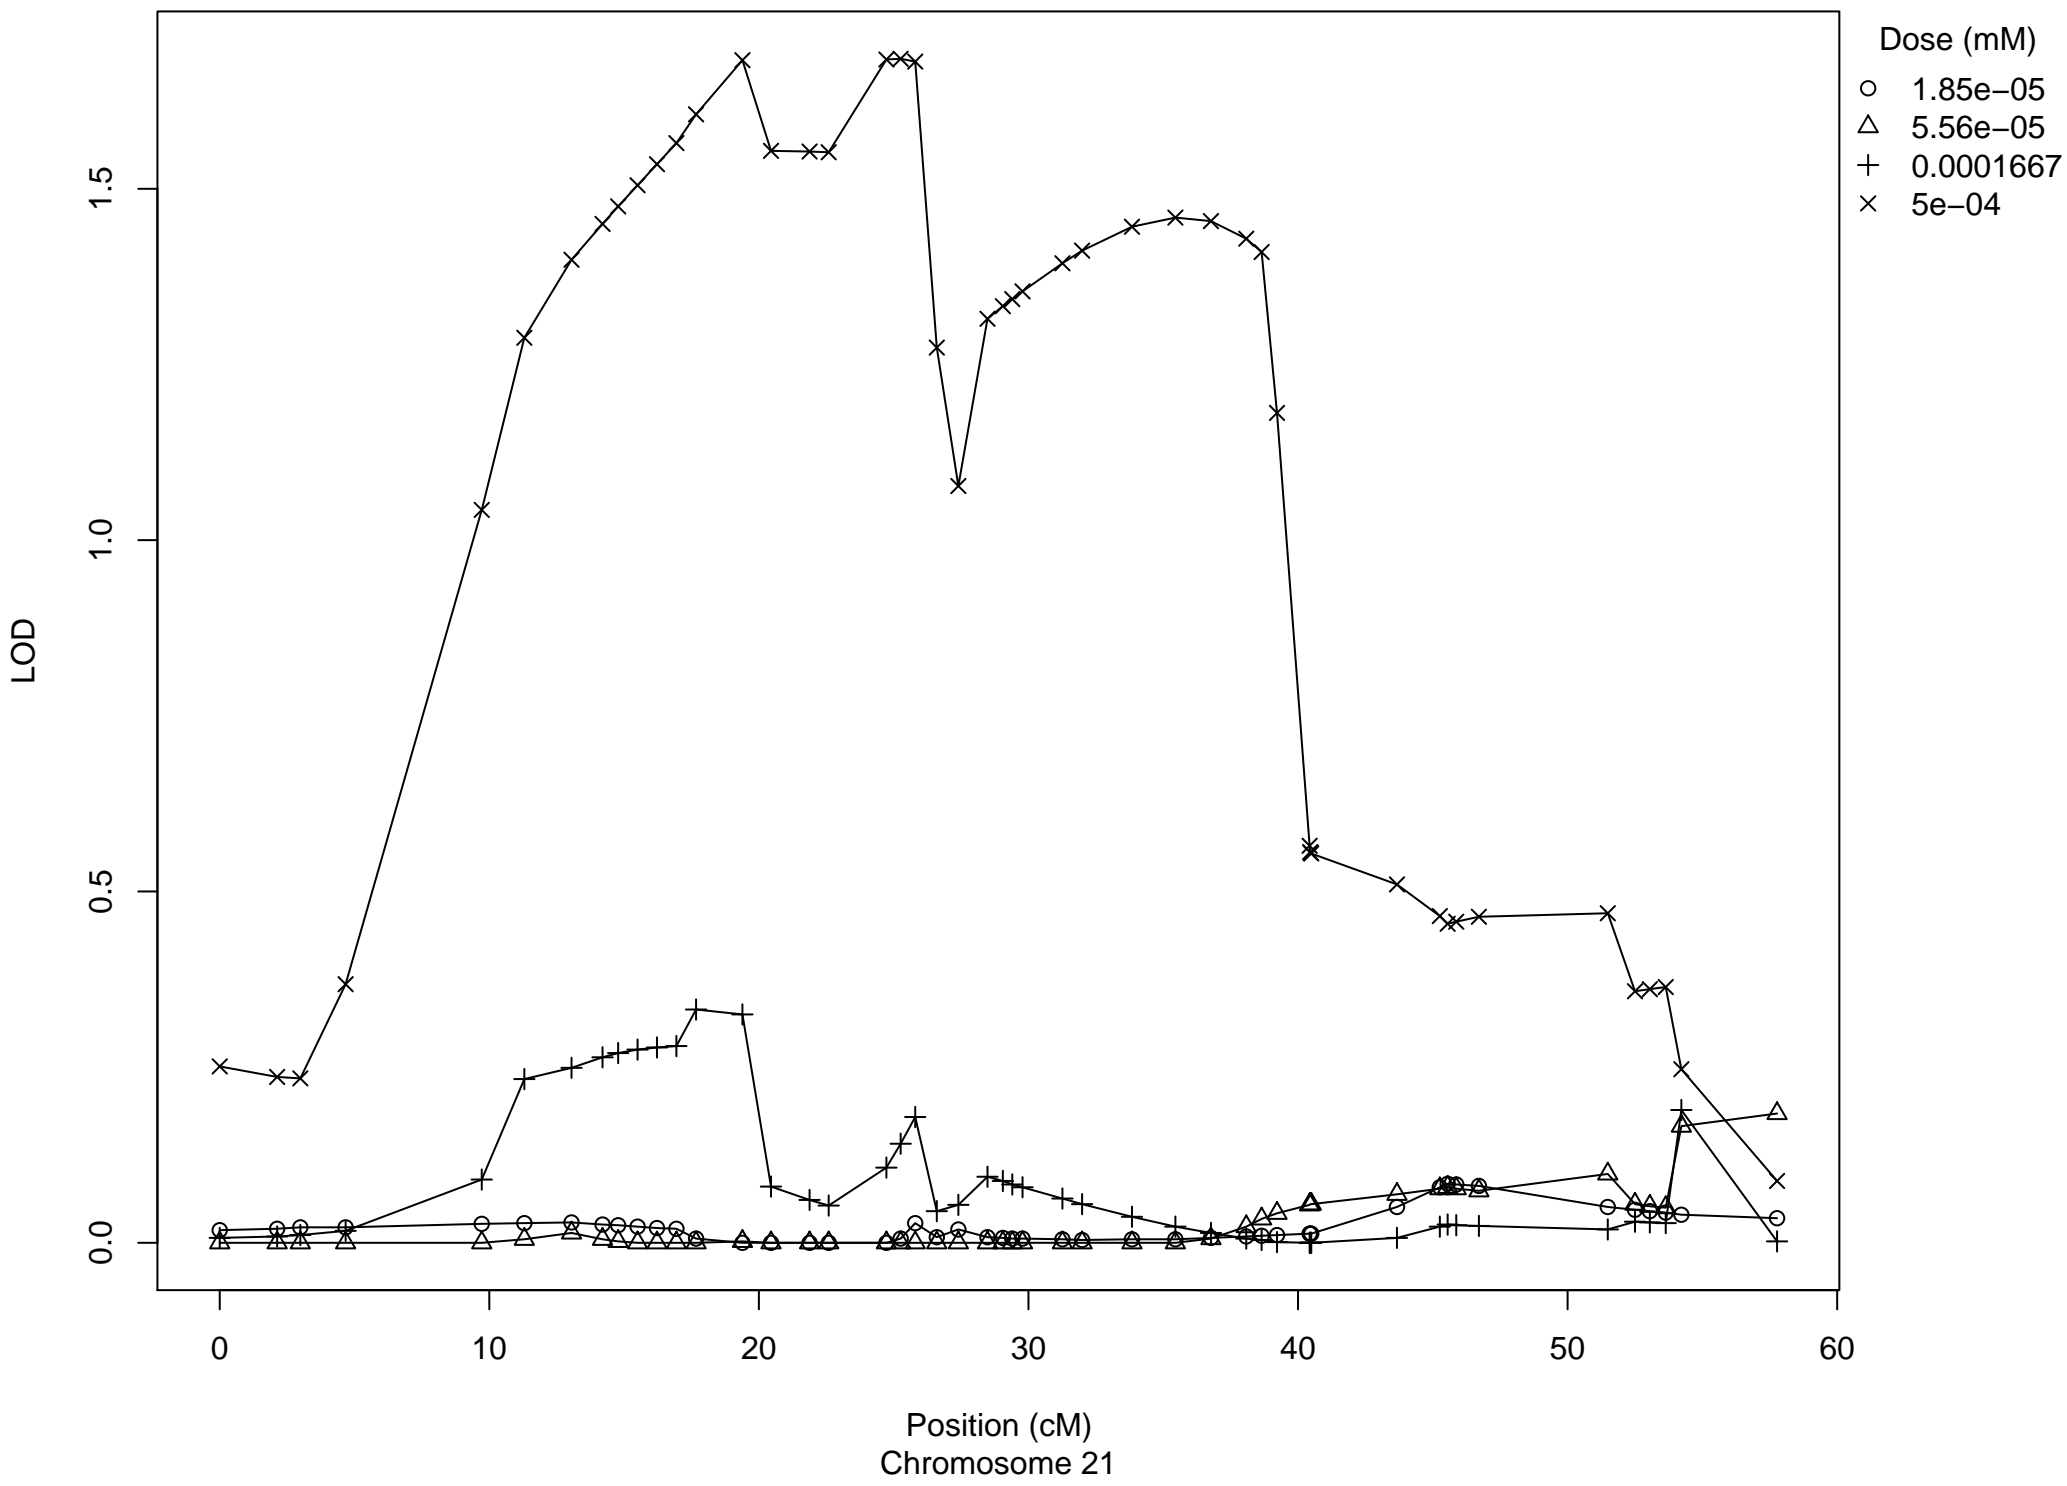

# Paclitaxel from Taxus Yunnanensis (Pac)

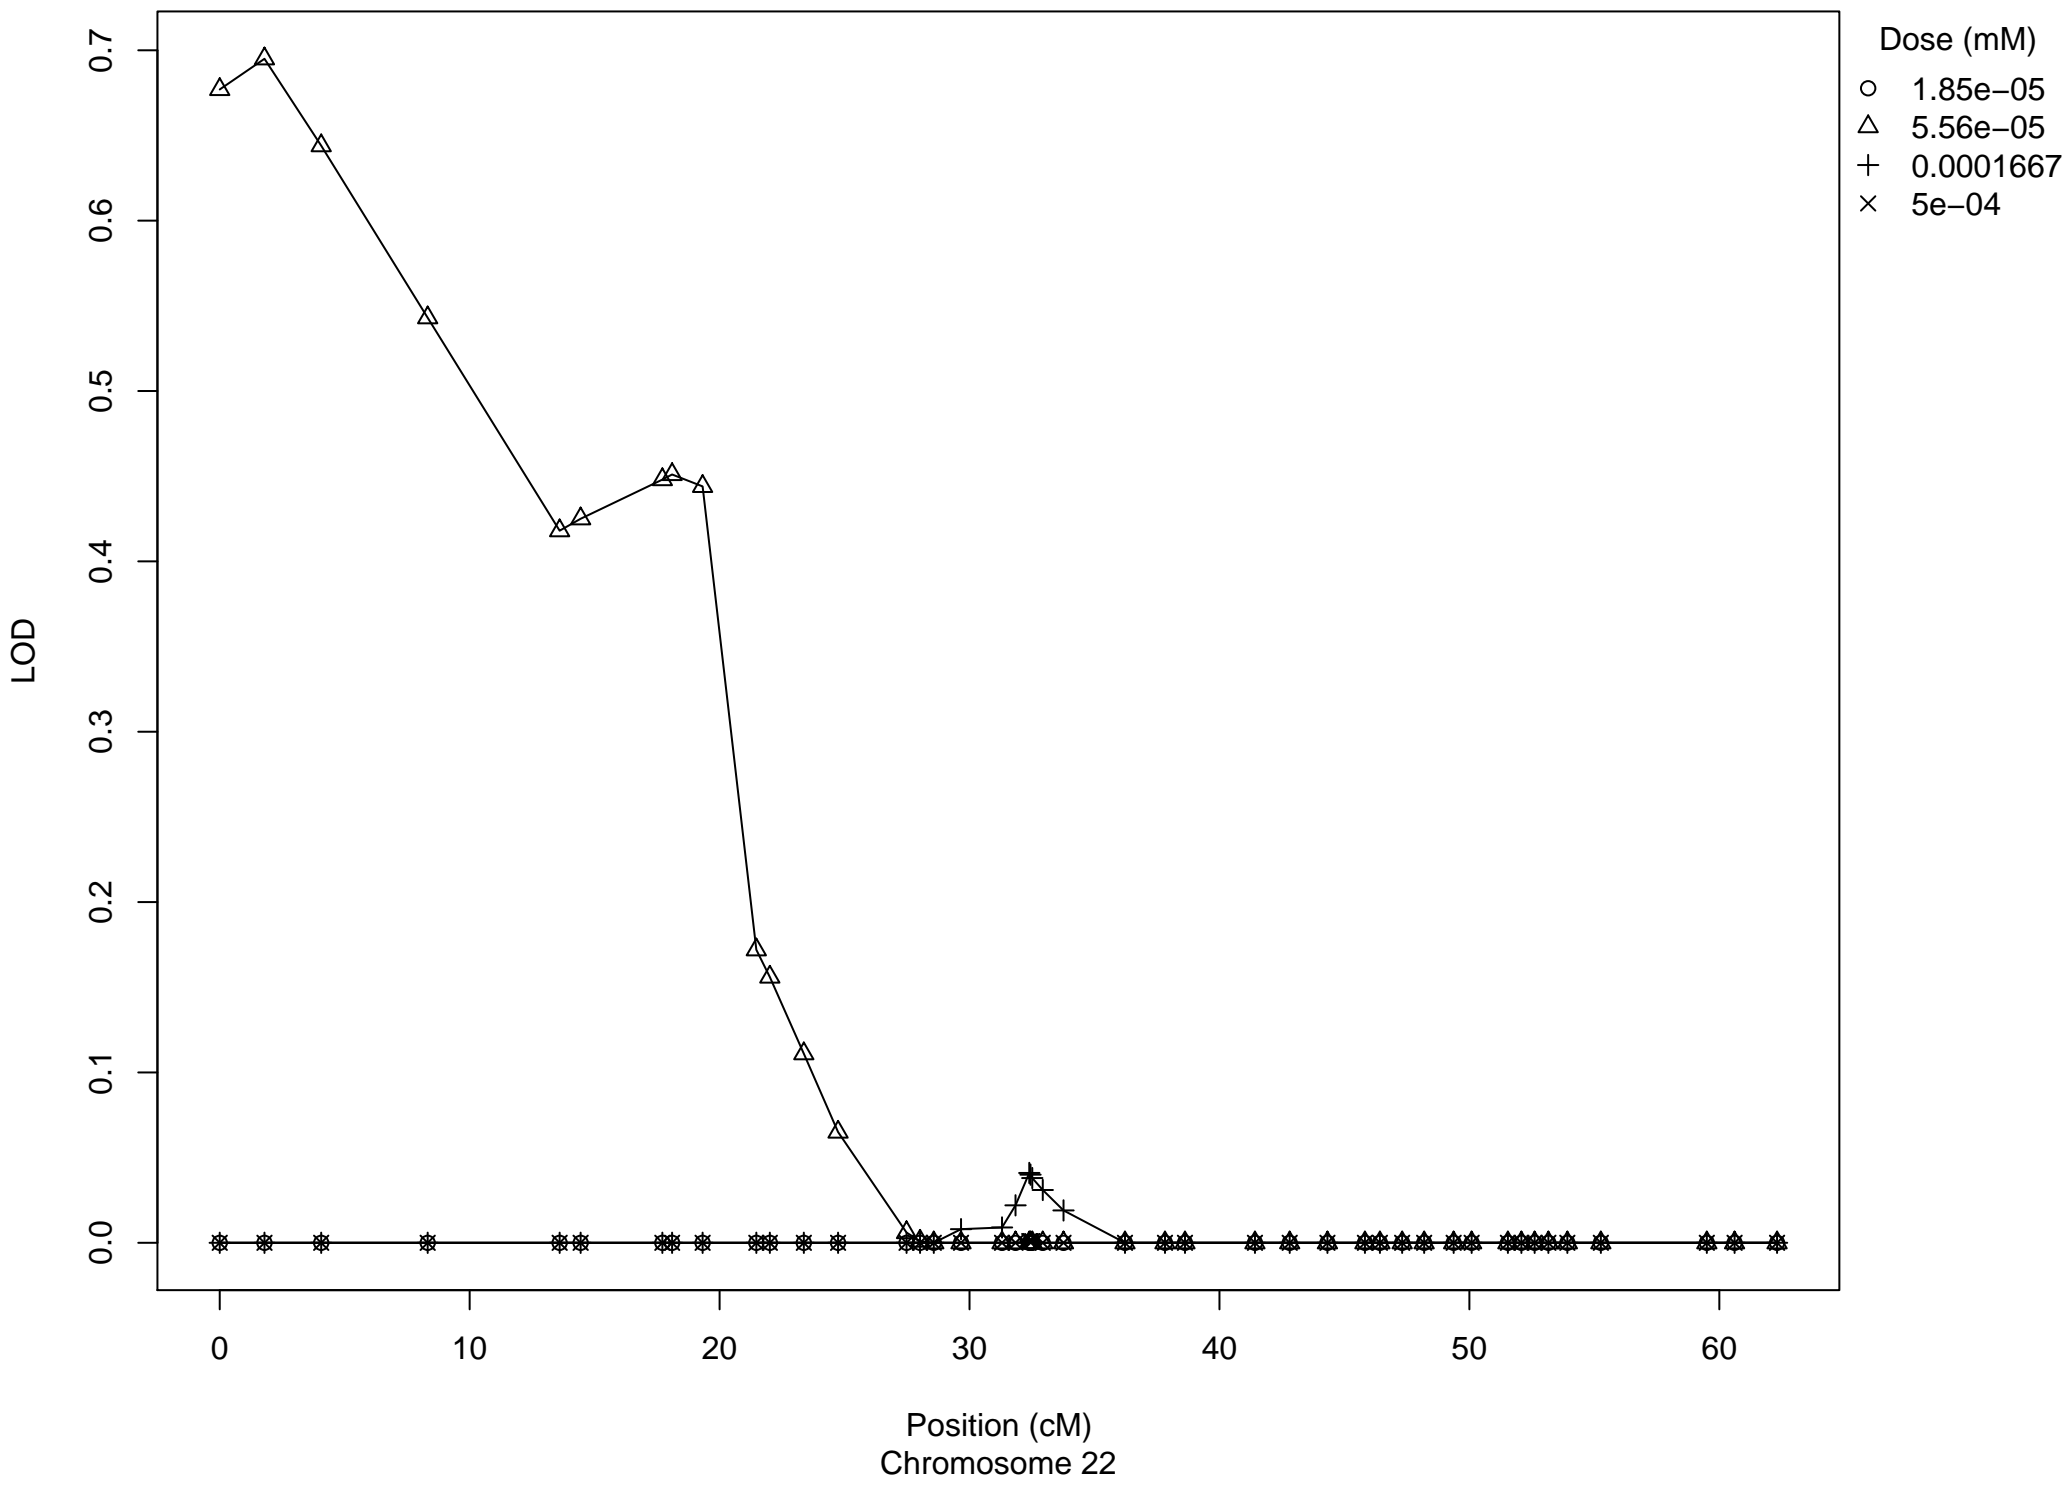

# Rapamycin (Rapa)

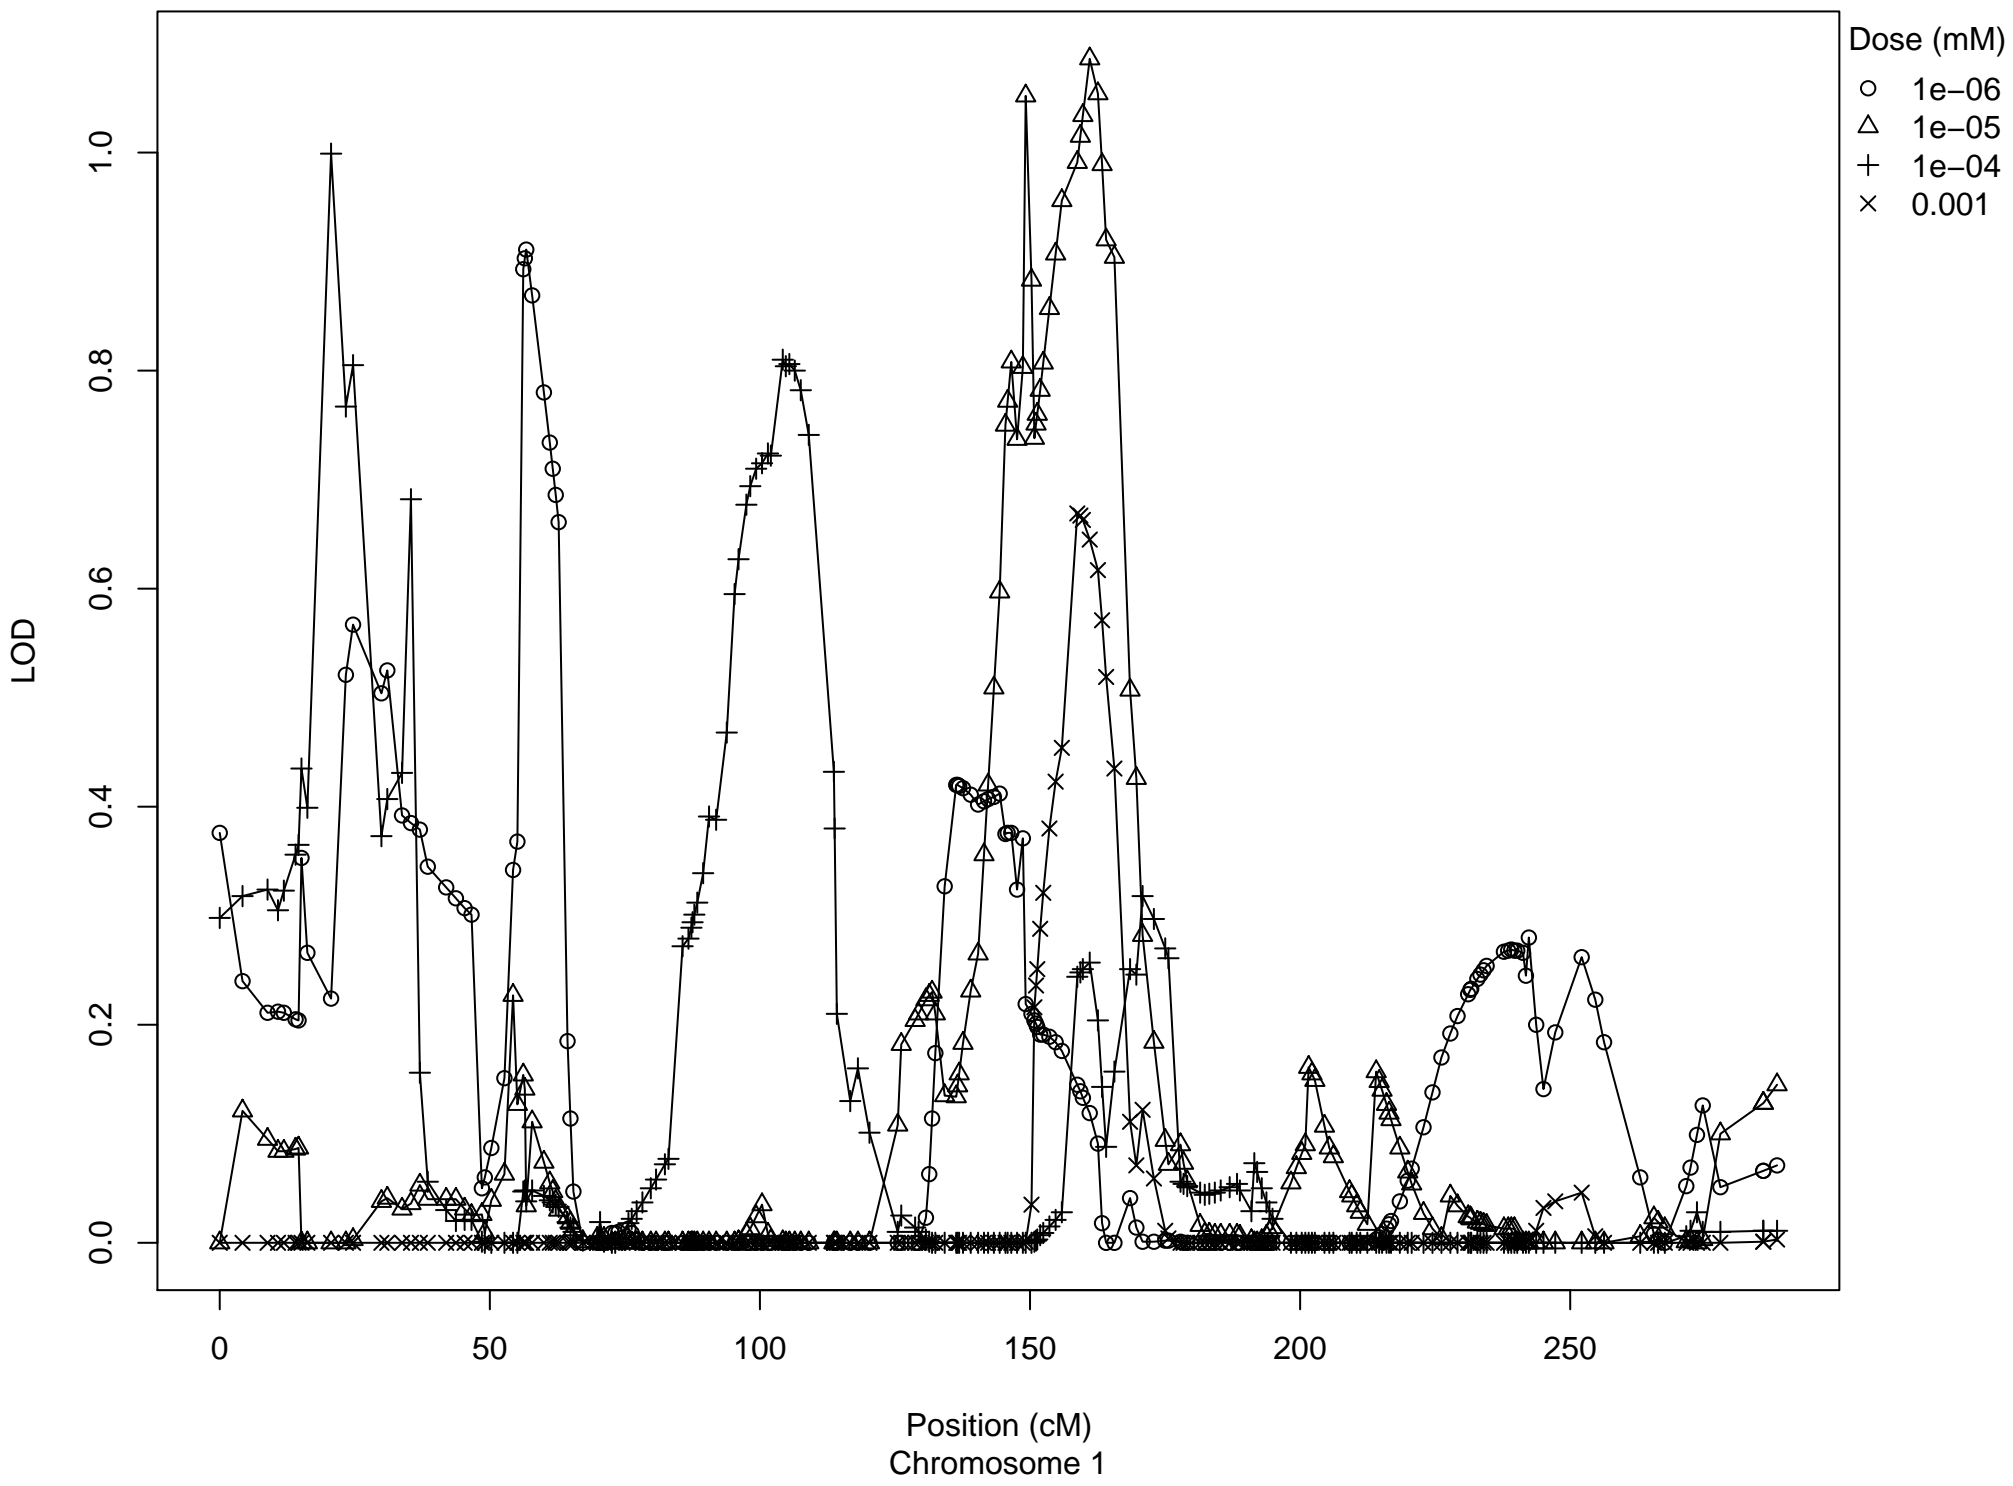

# Rapamycin (Rapa)

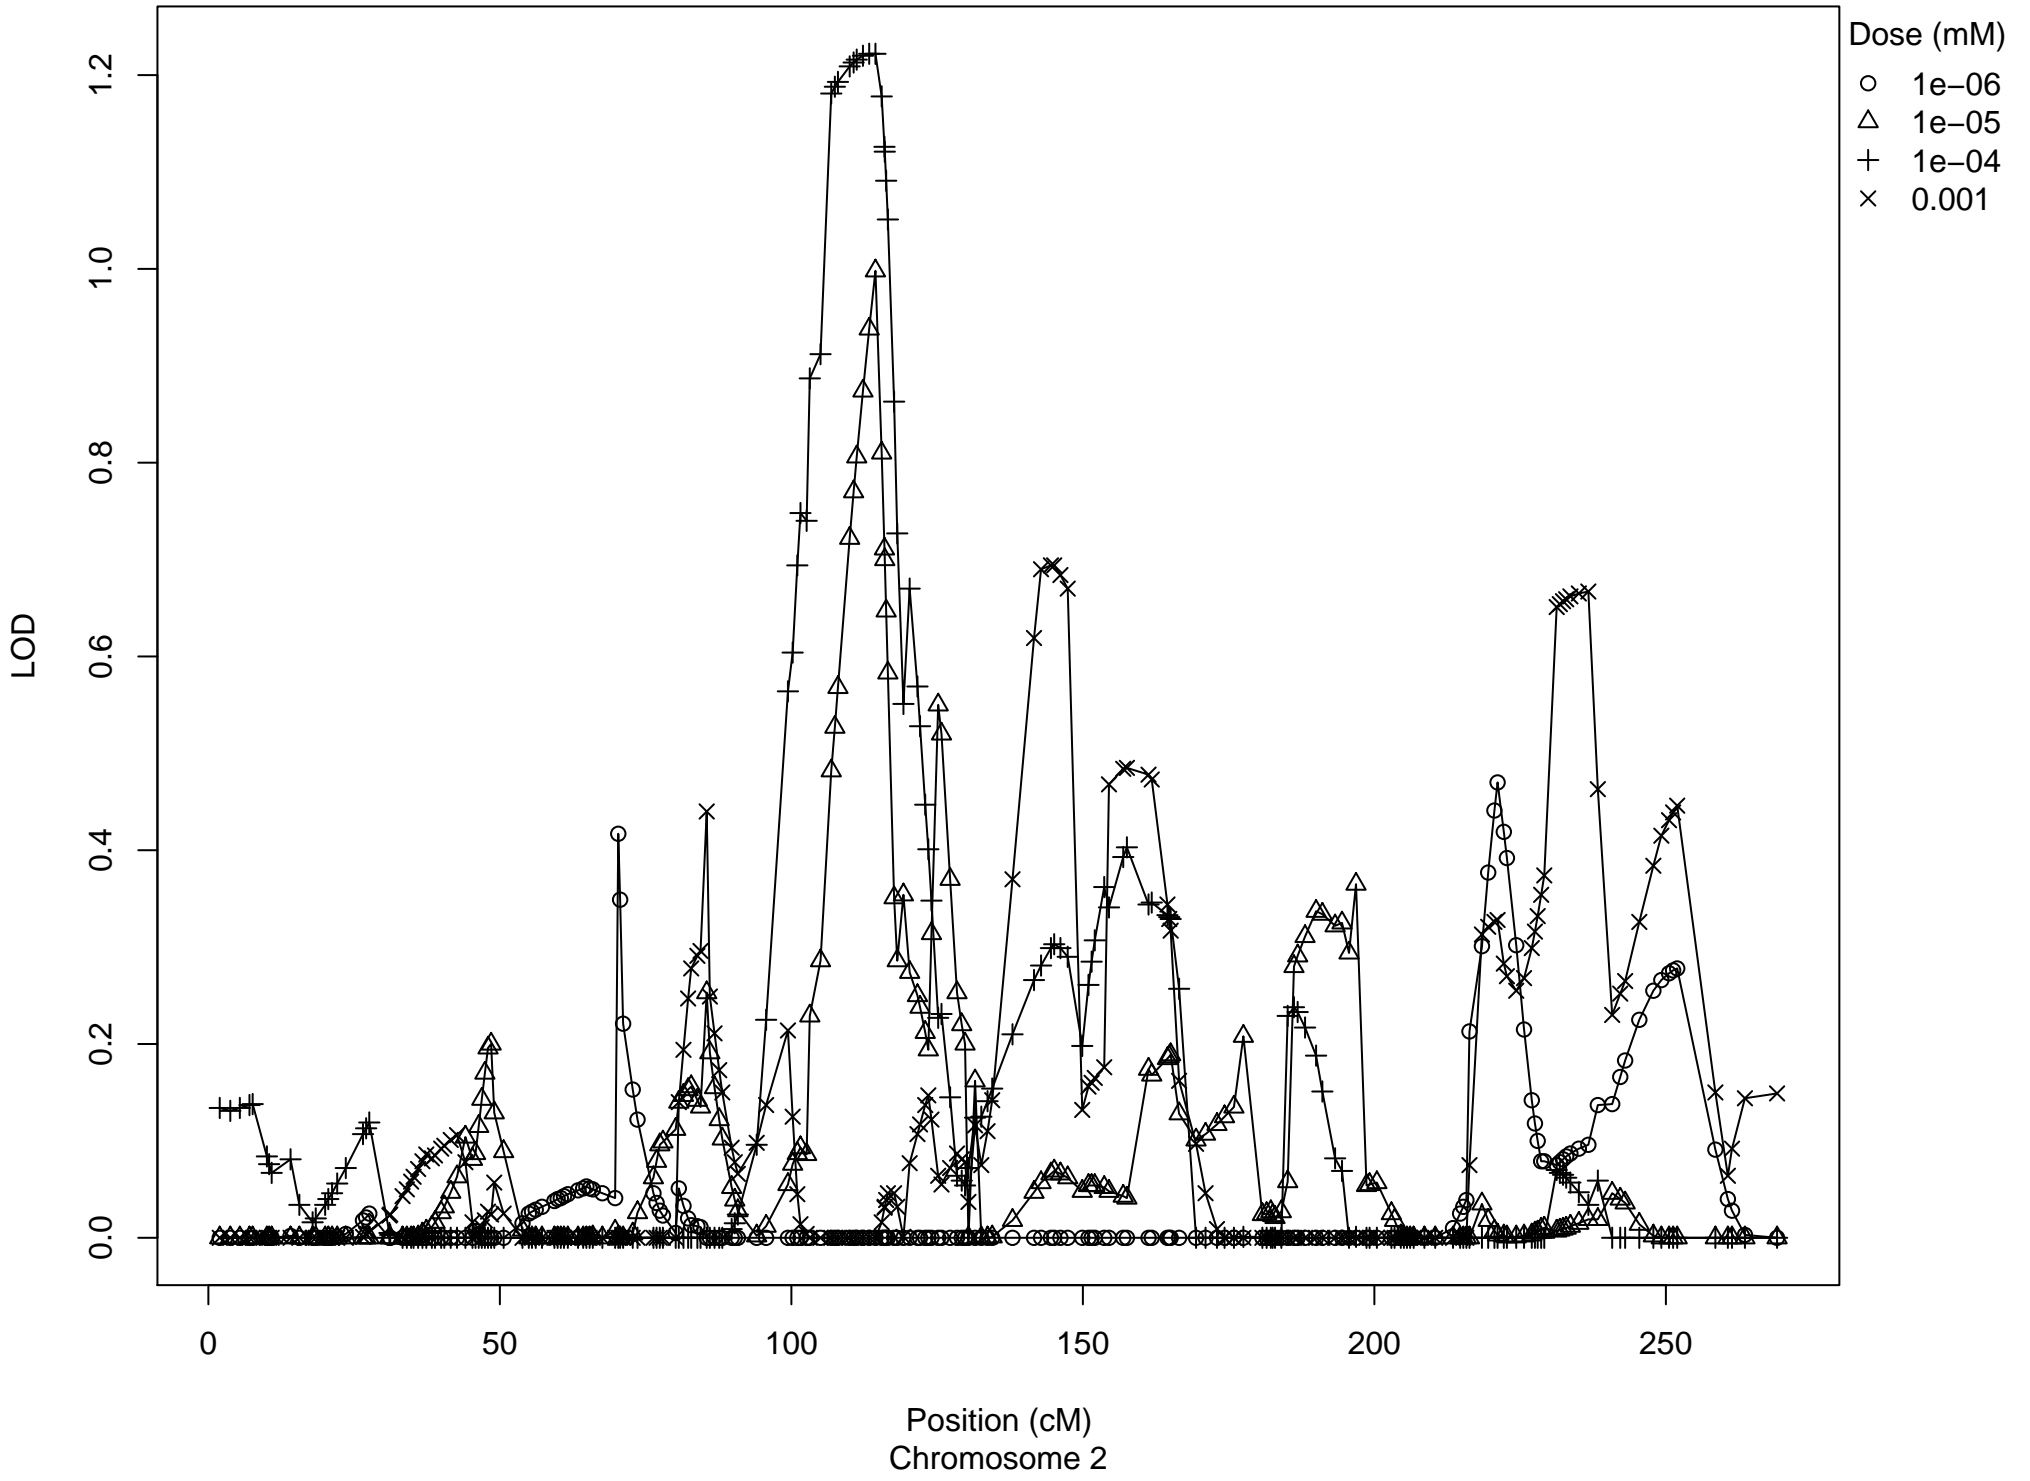

# Rapamycin (Rapa)

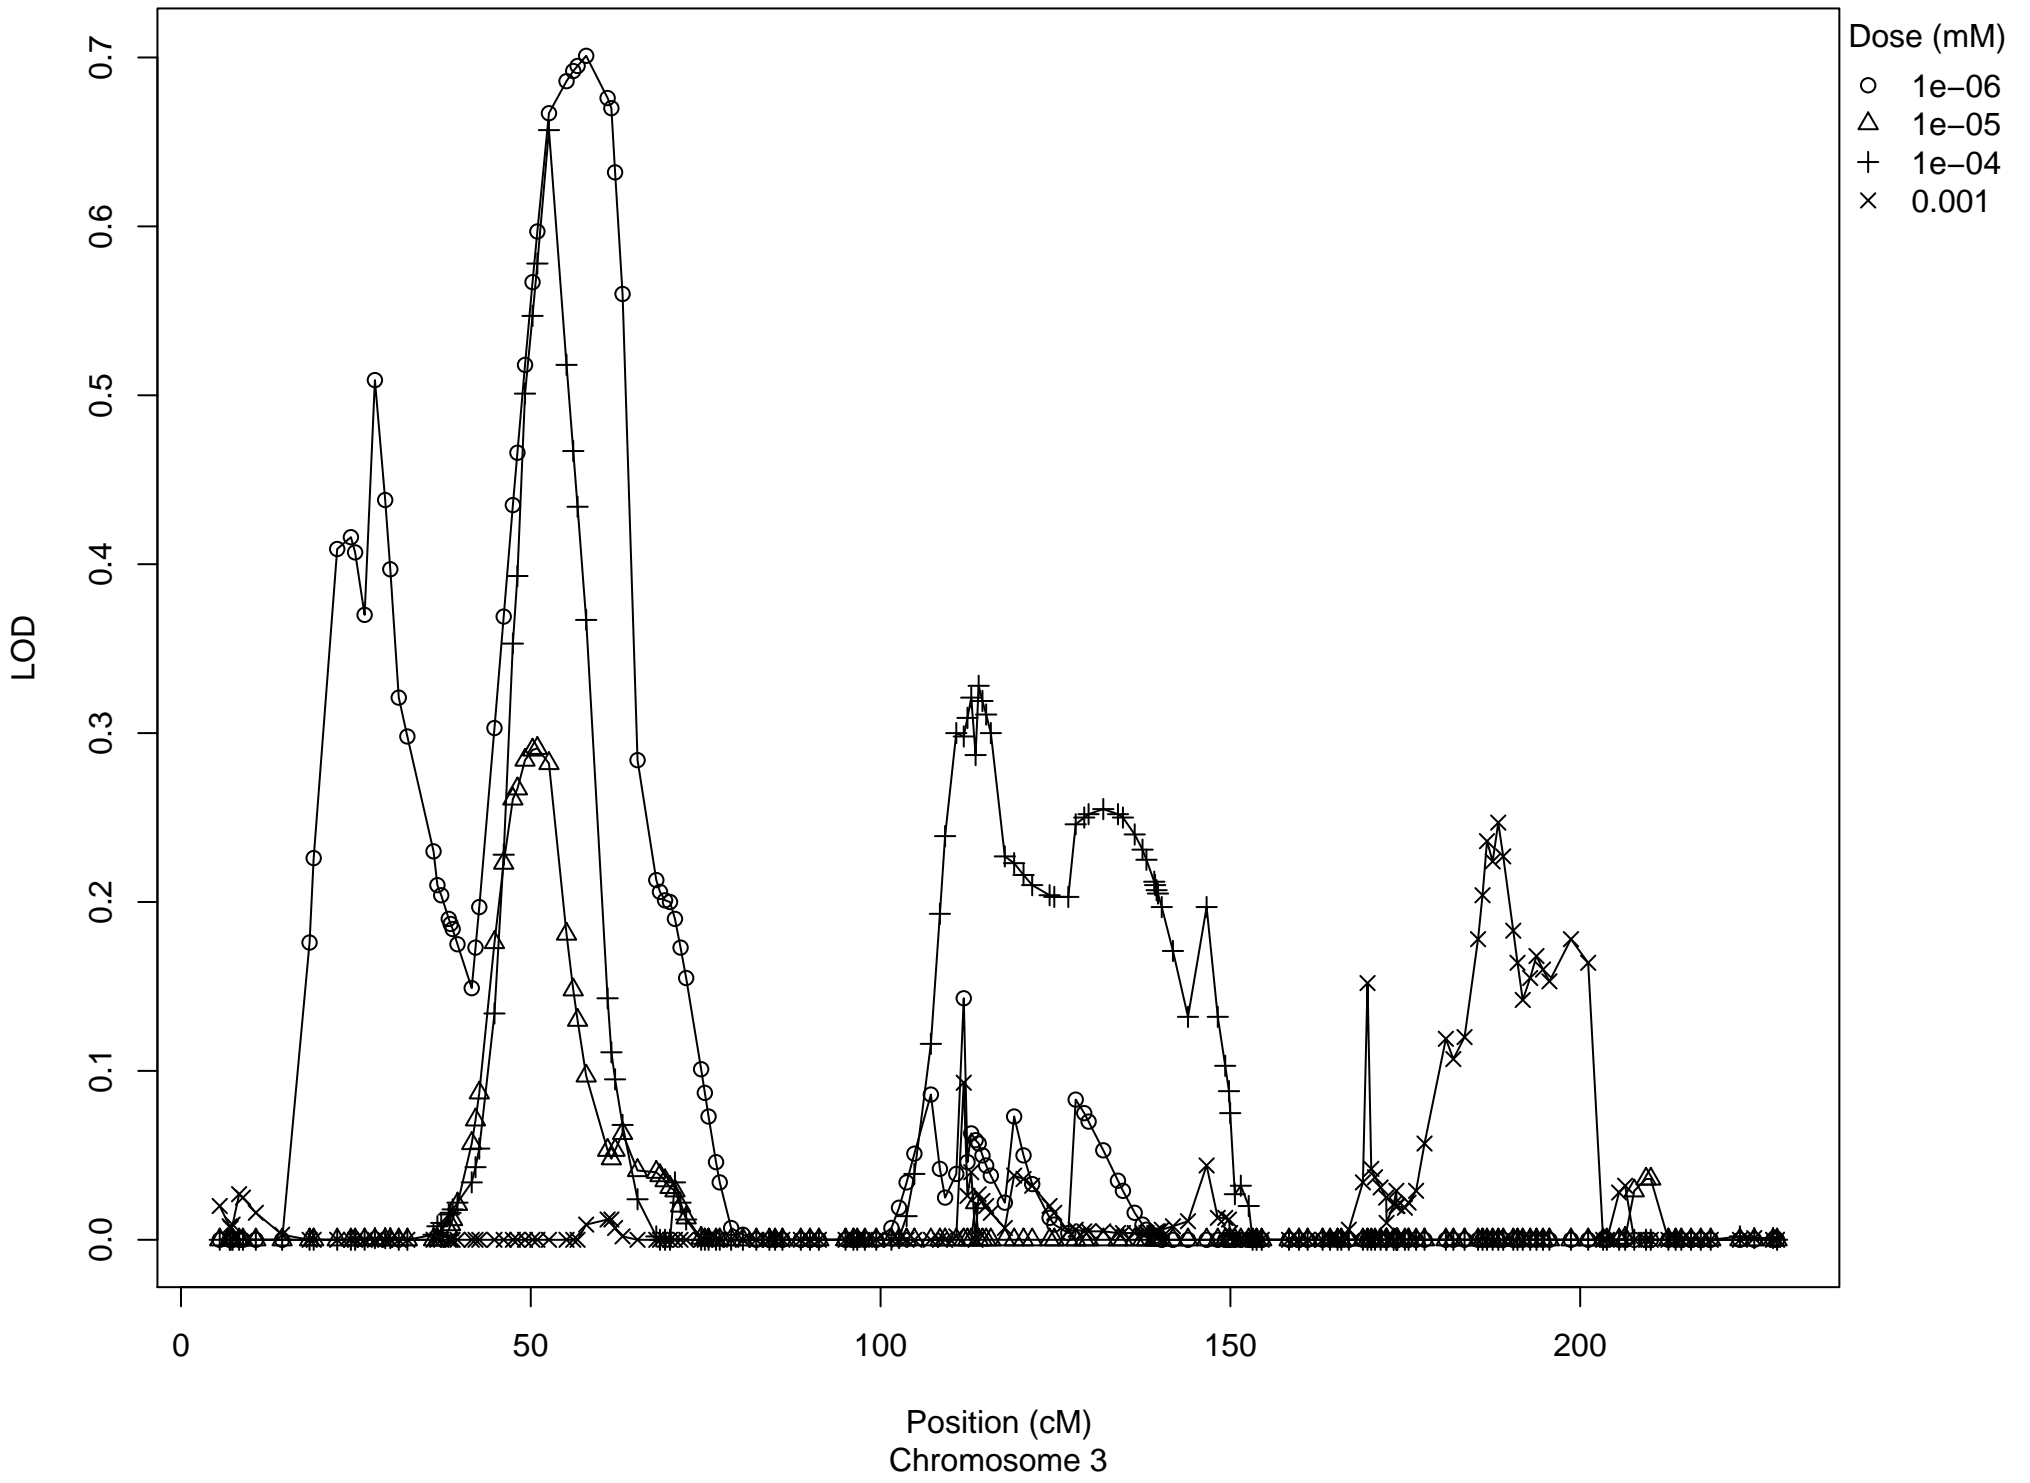

# Rapamycin (Rapa)

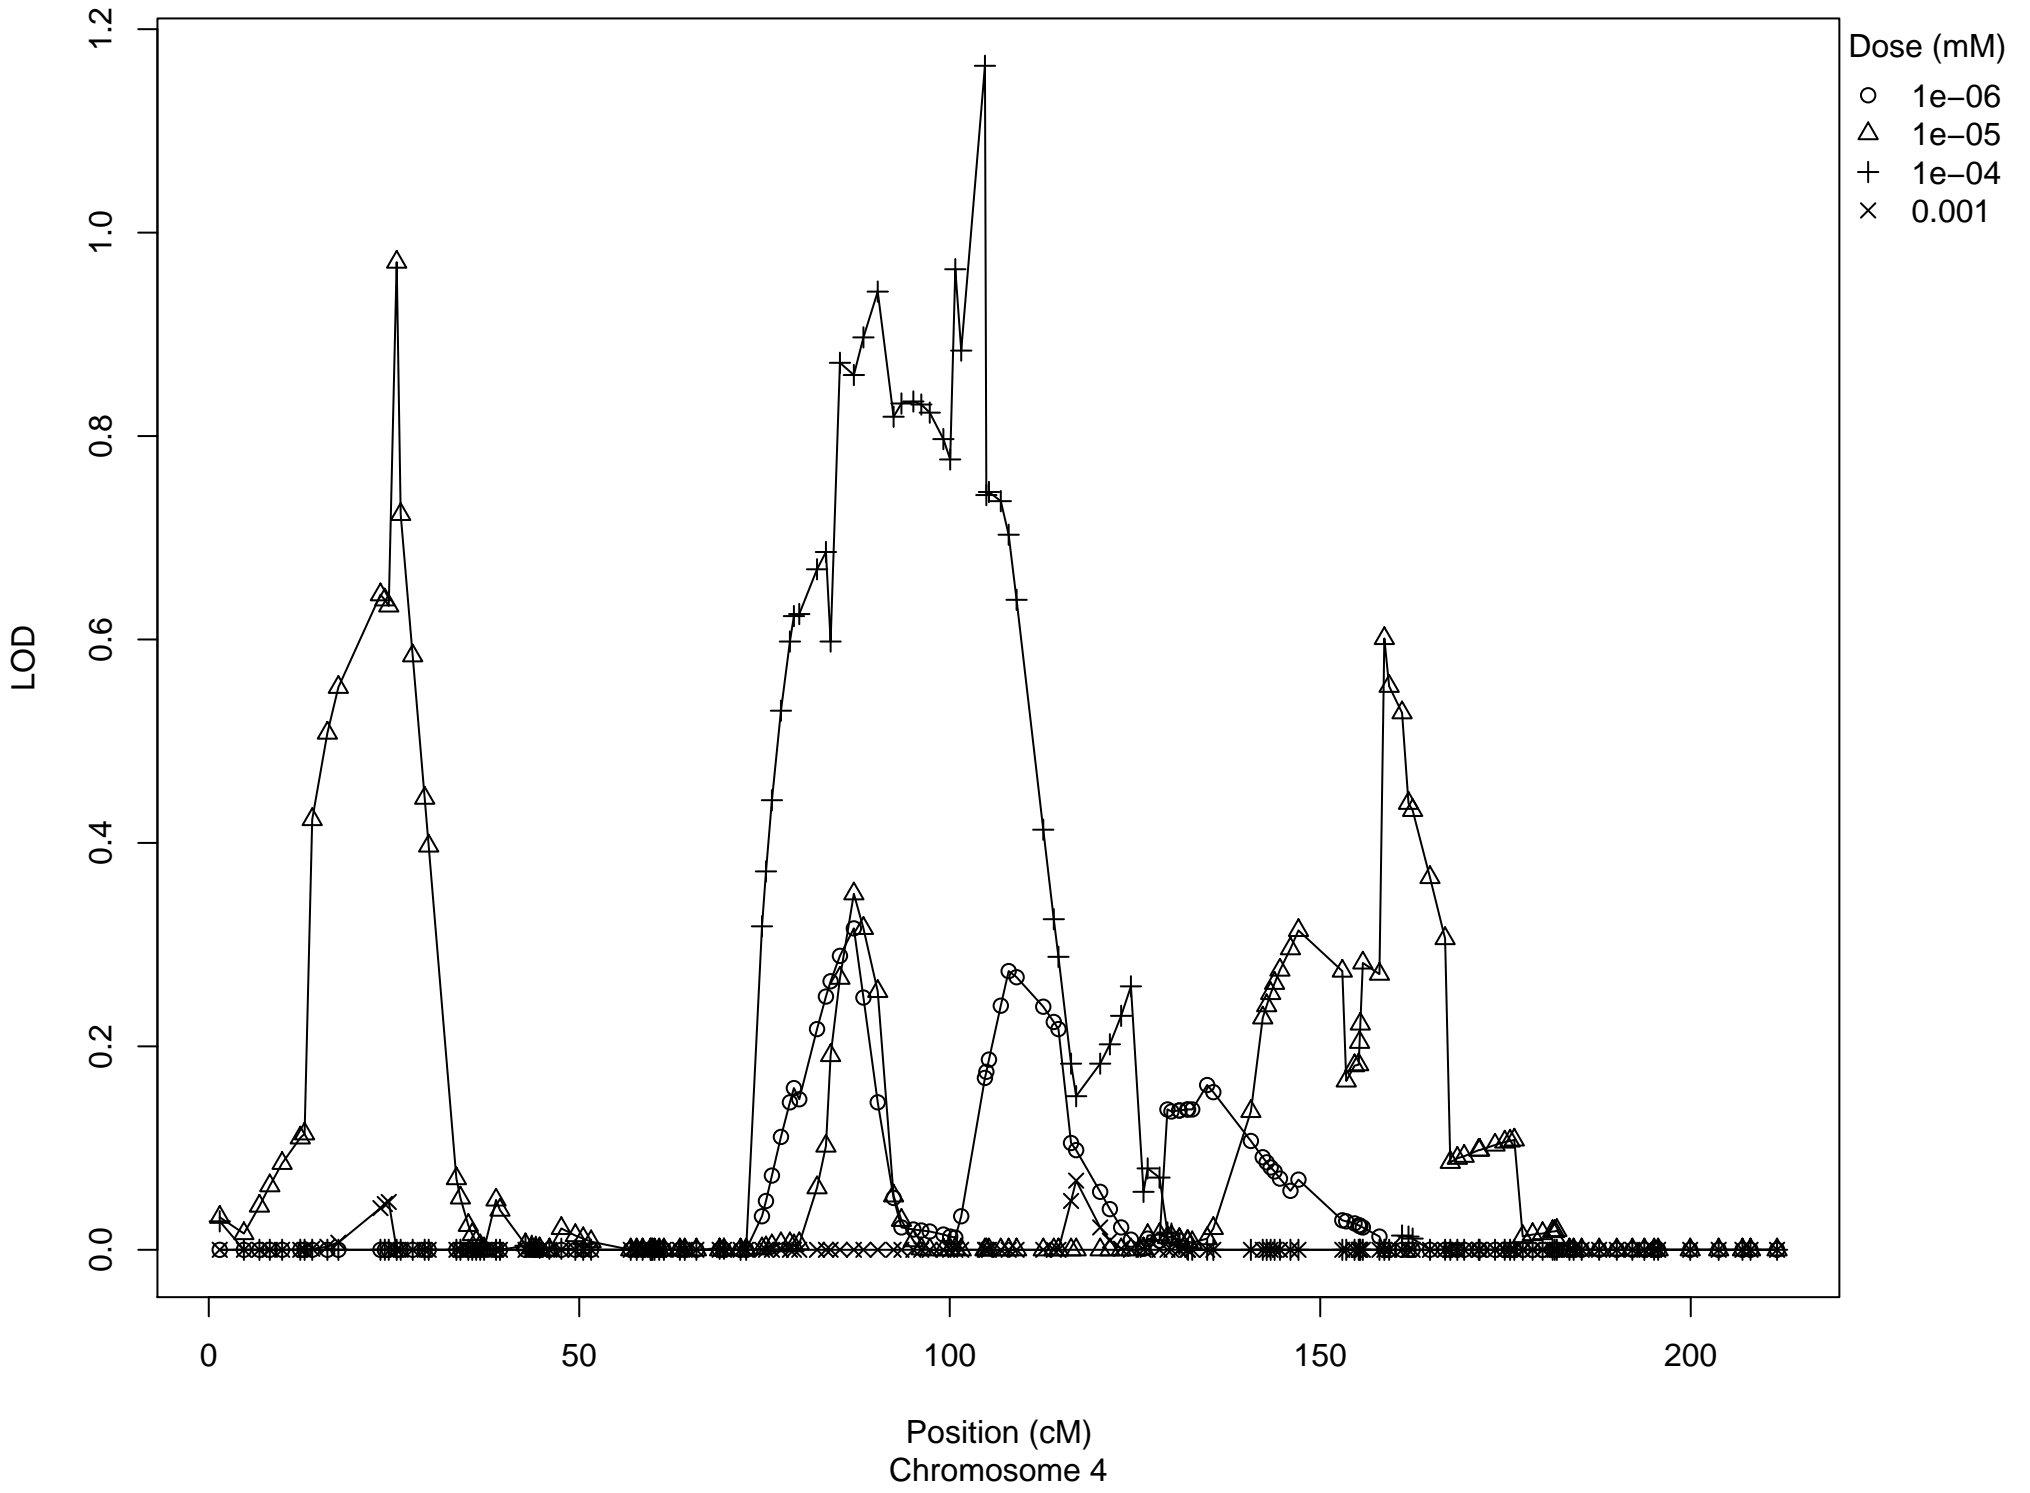



# Rapamycin (Rapa)

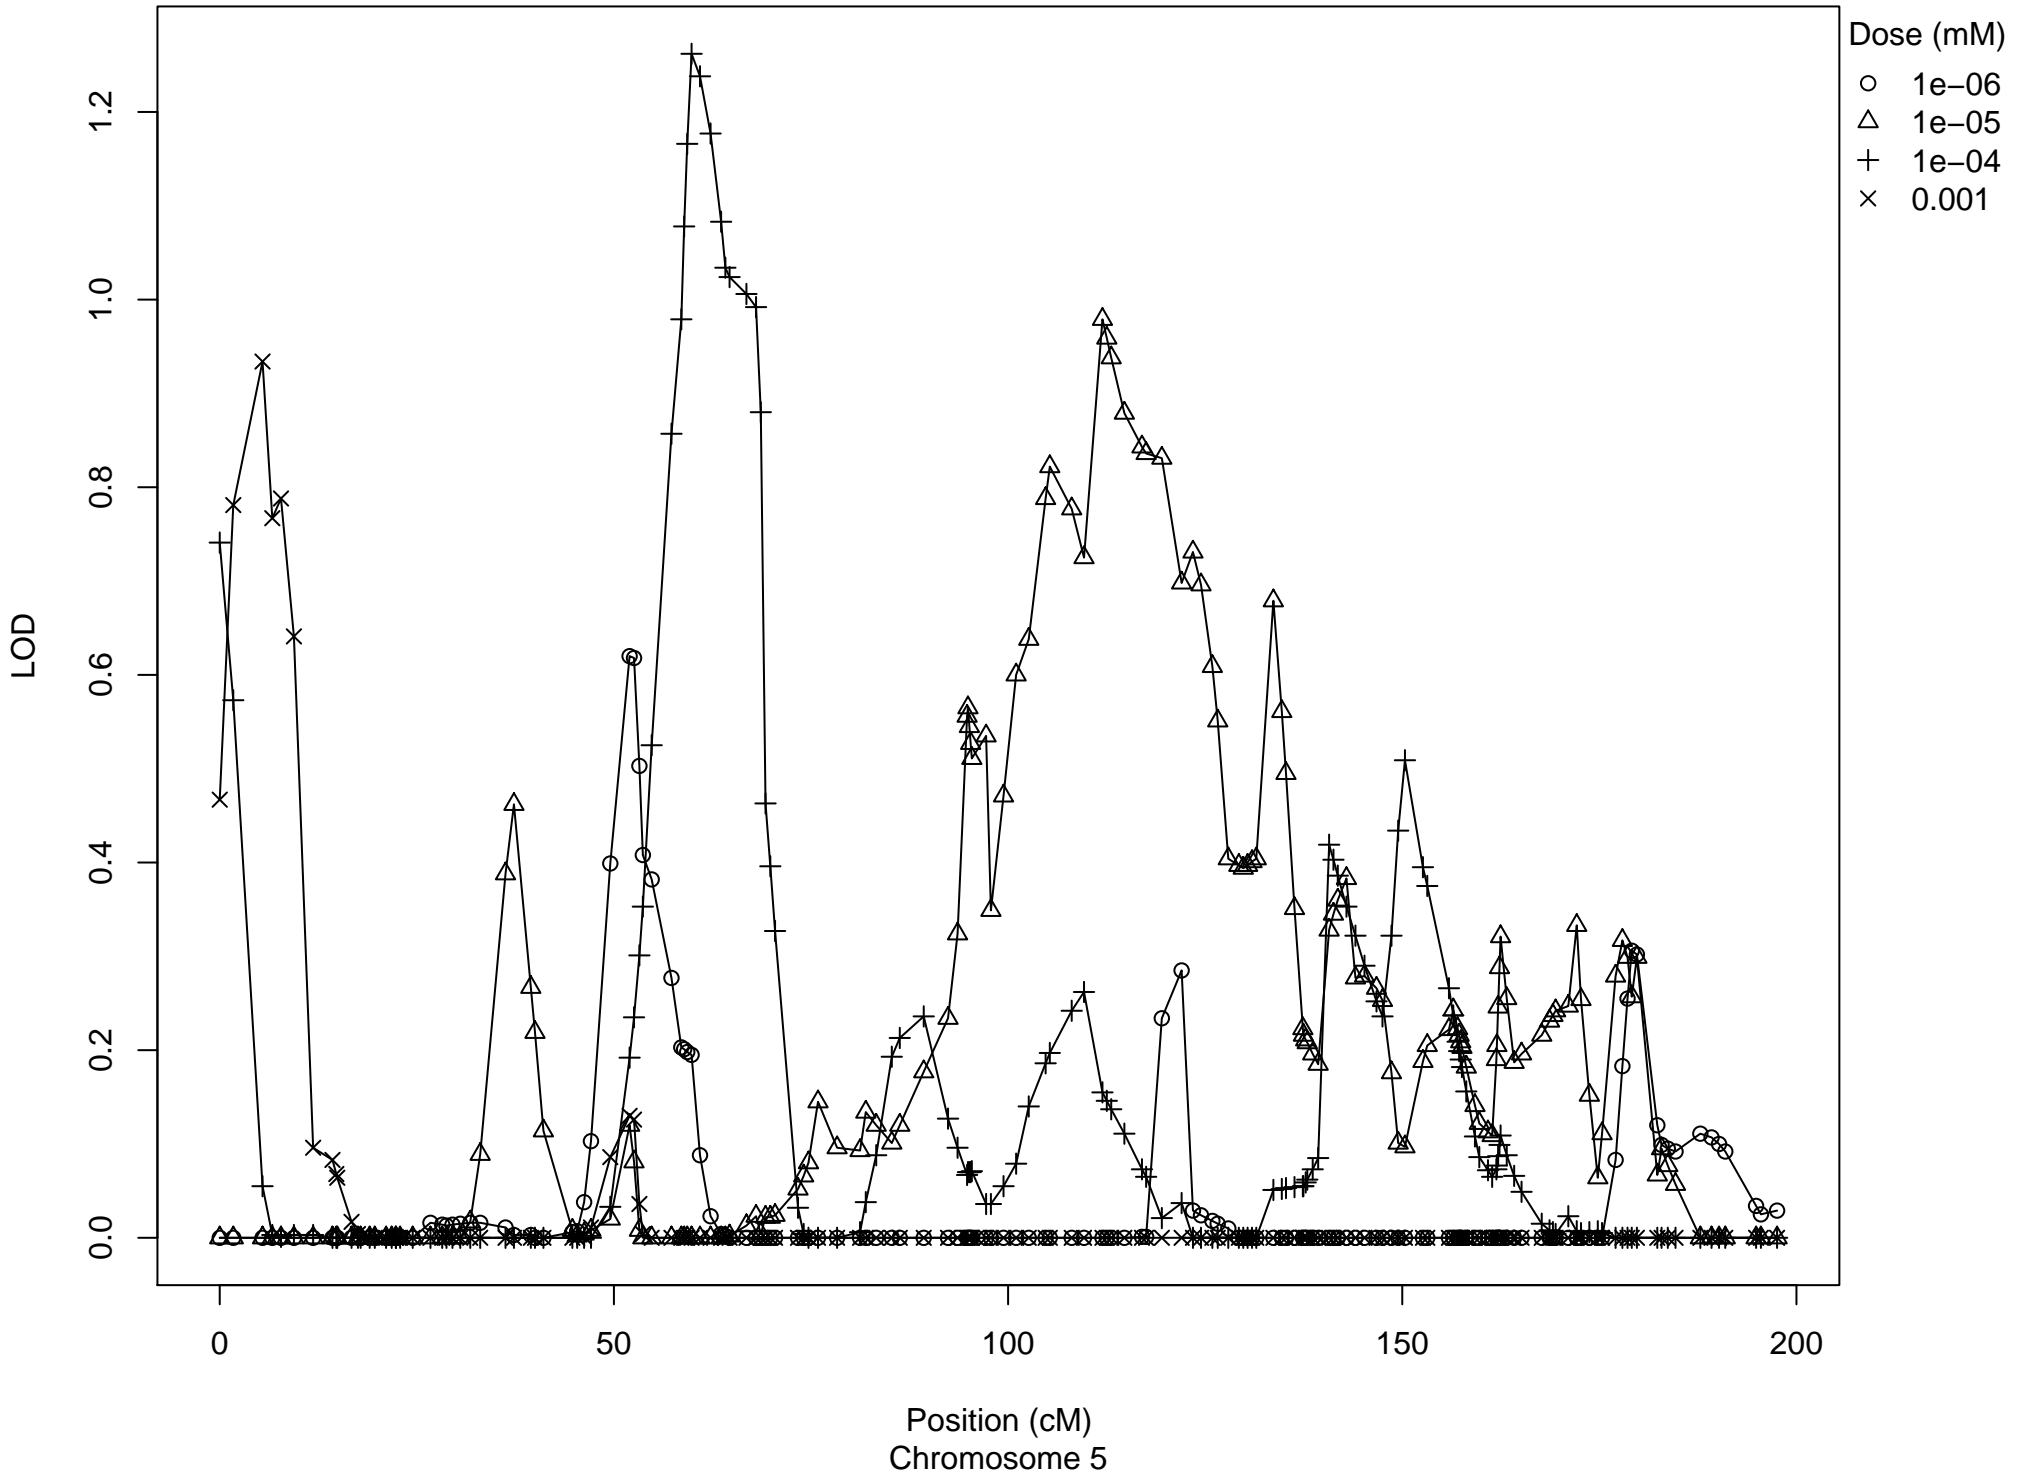

# Rapamycin (Rapa)

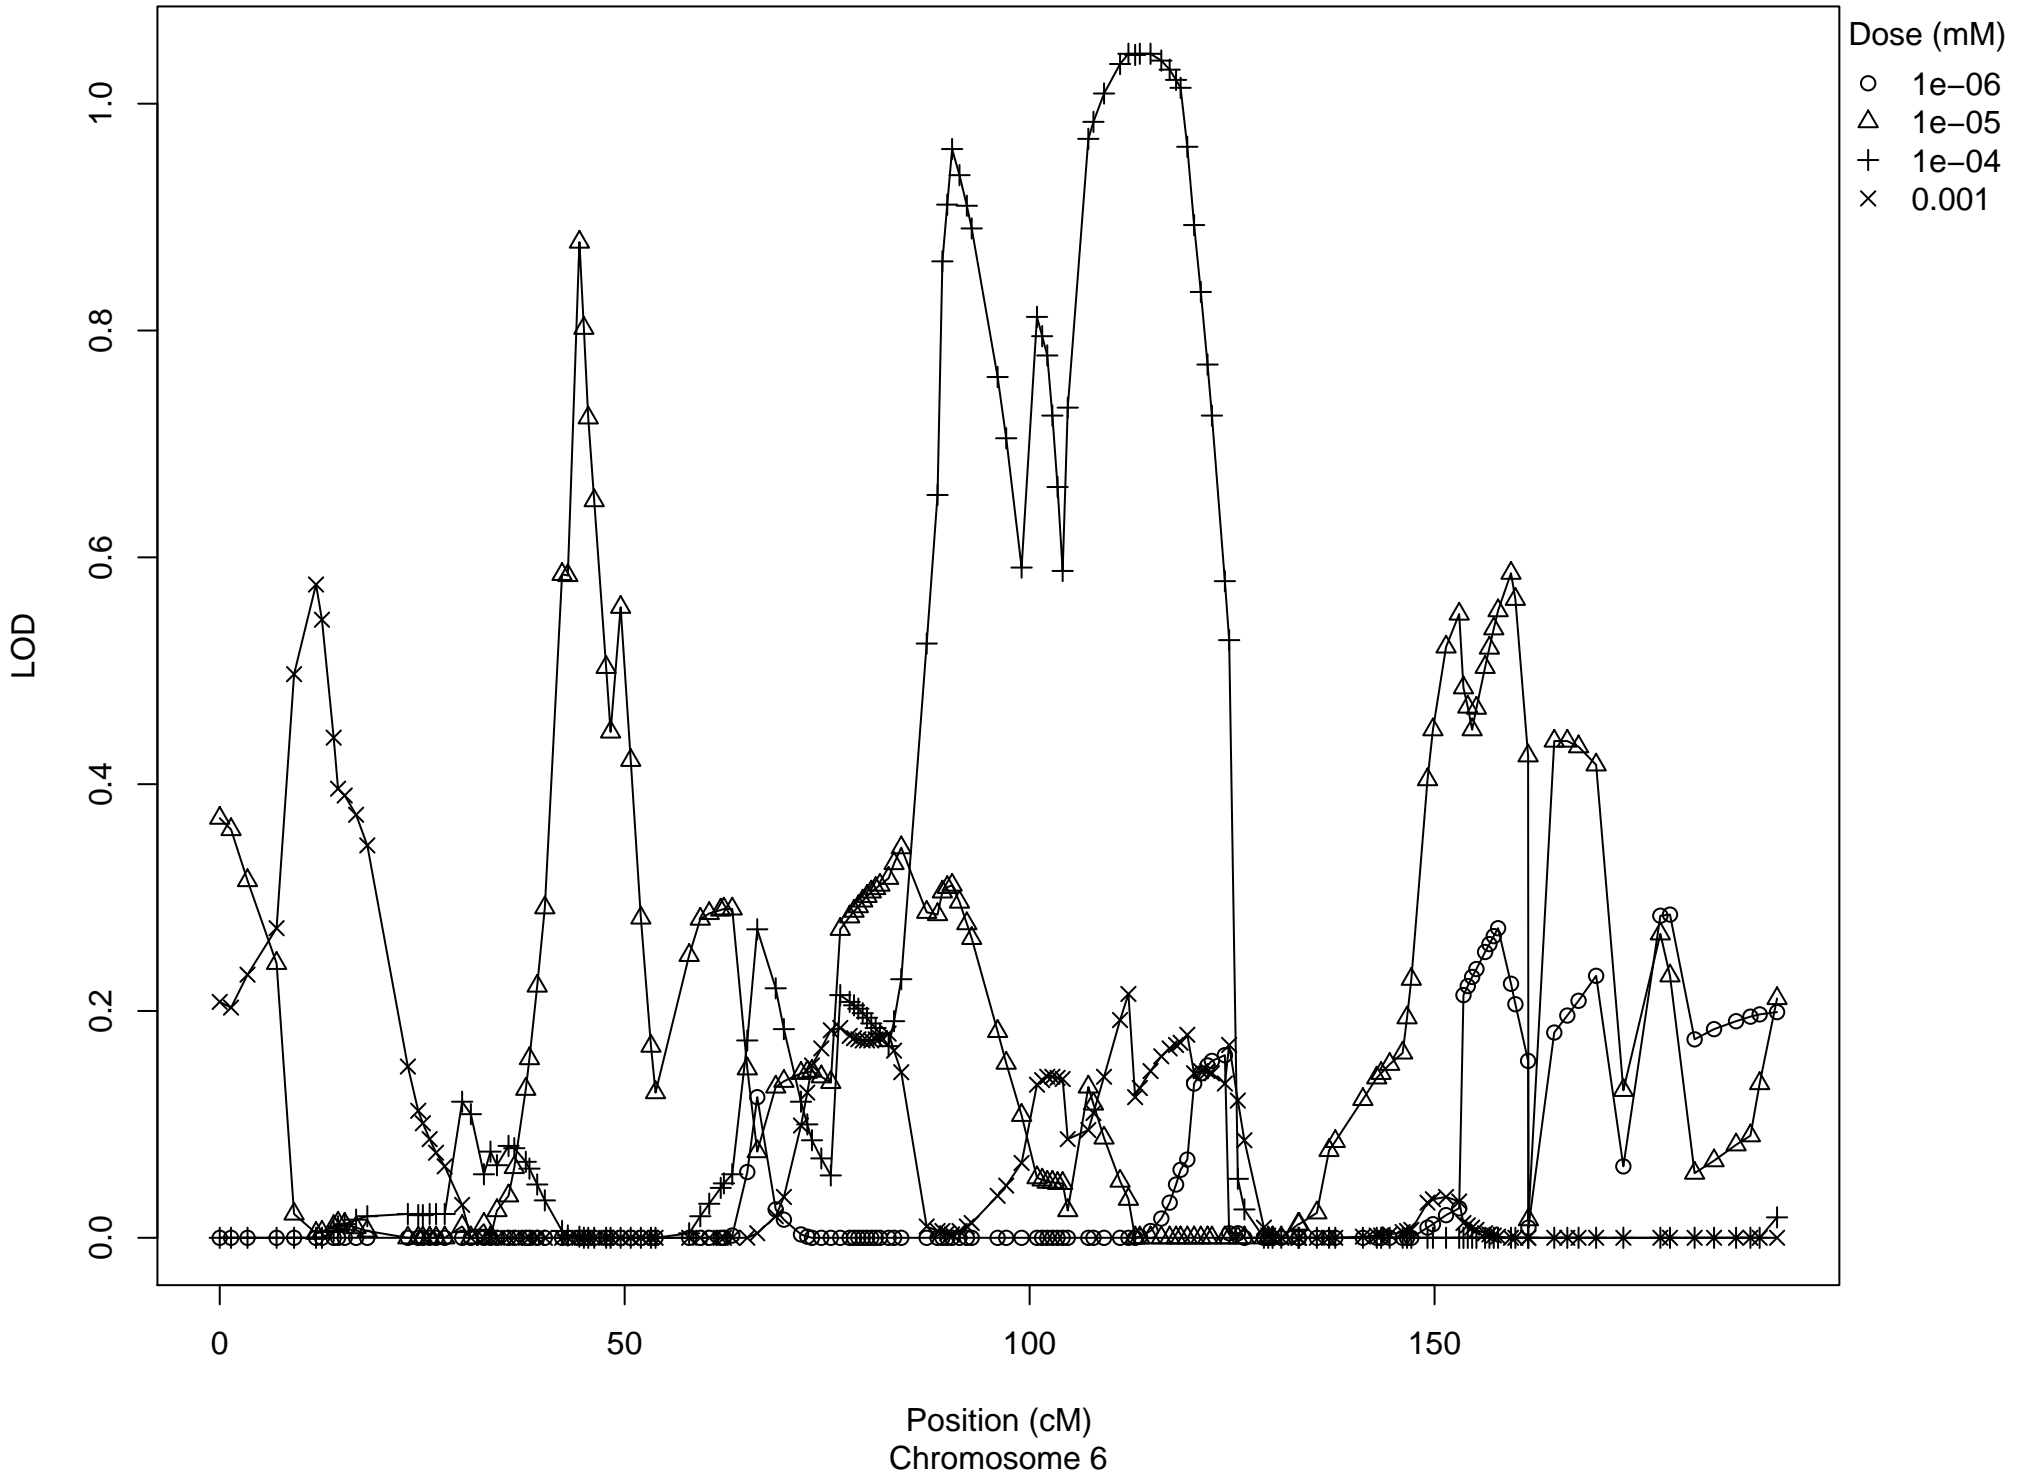

# Rapamycin (Rapa)

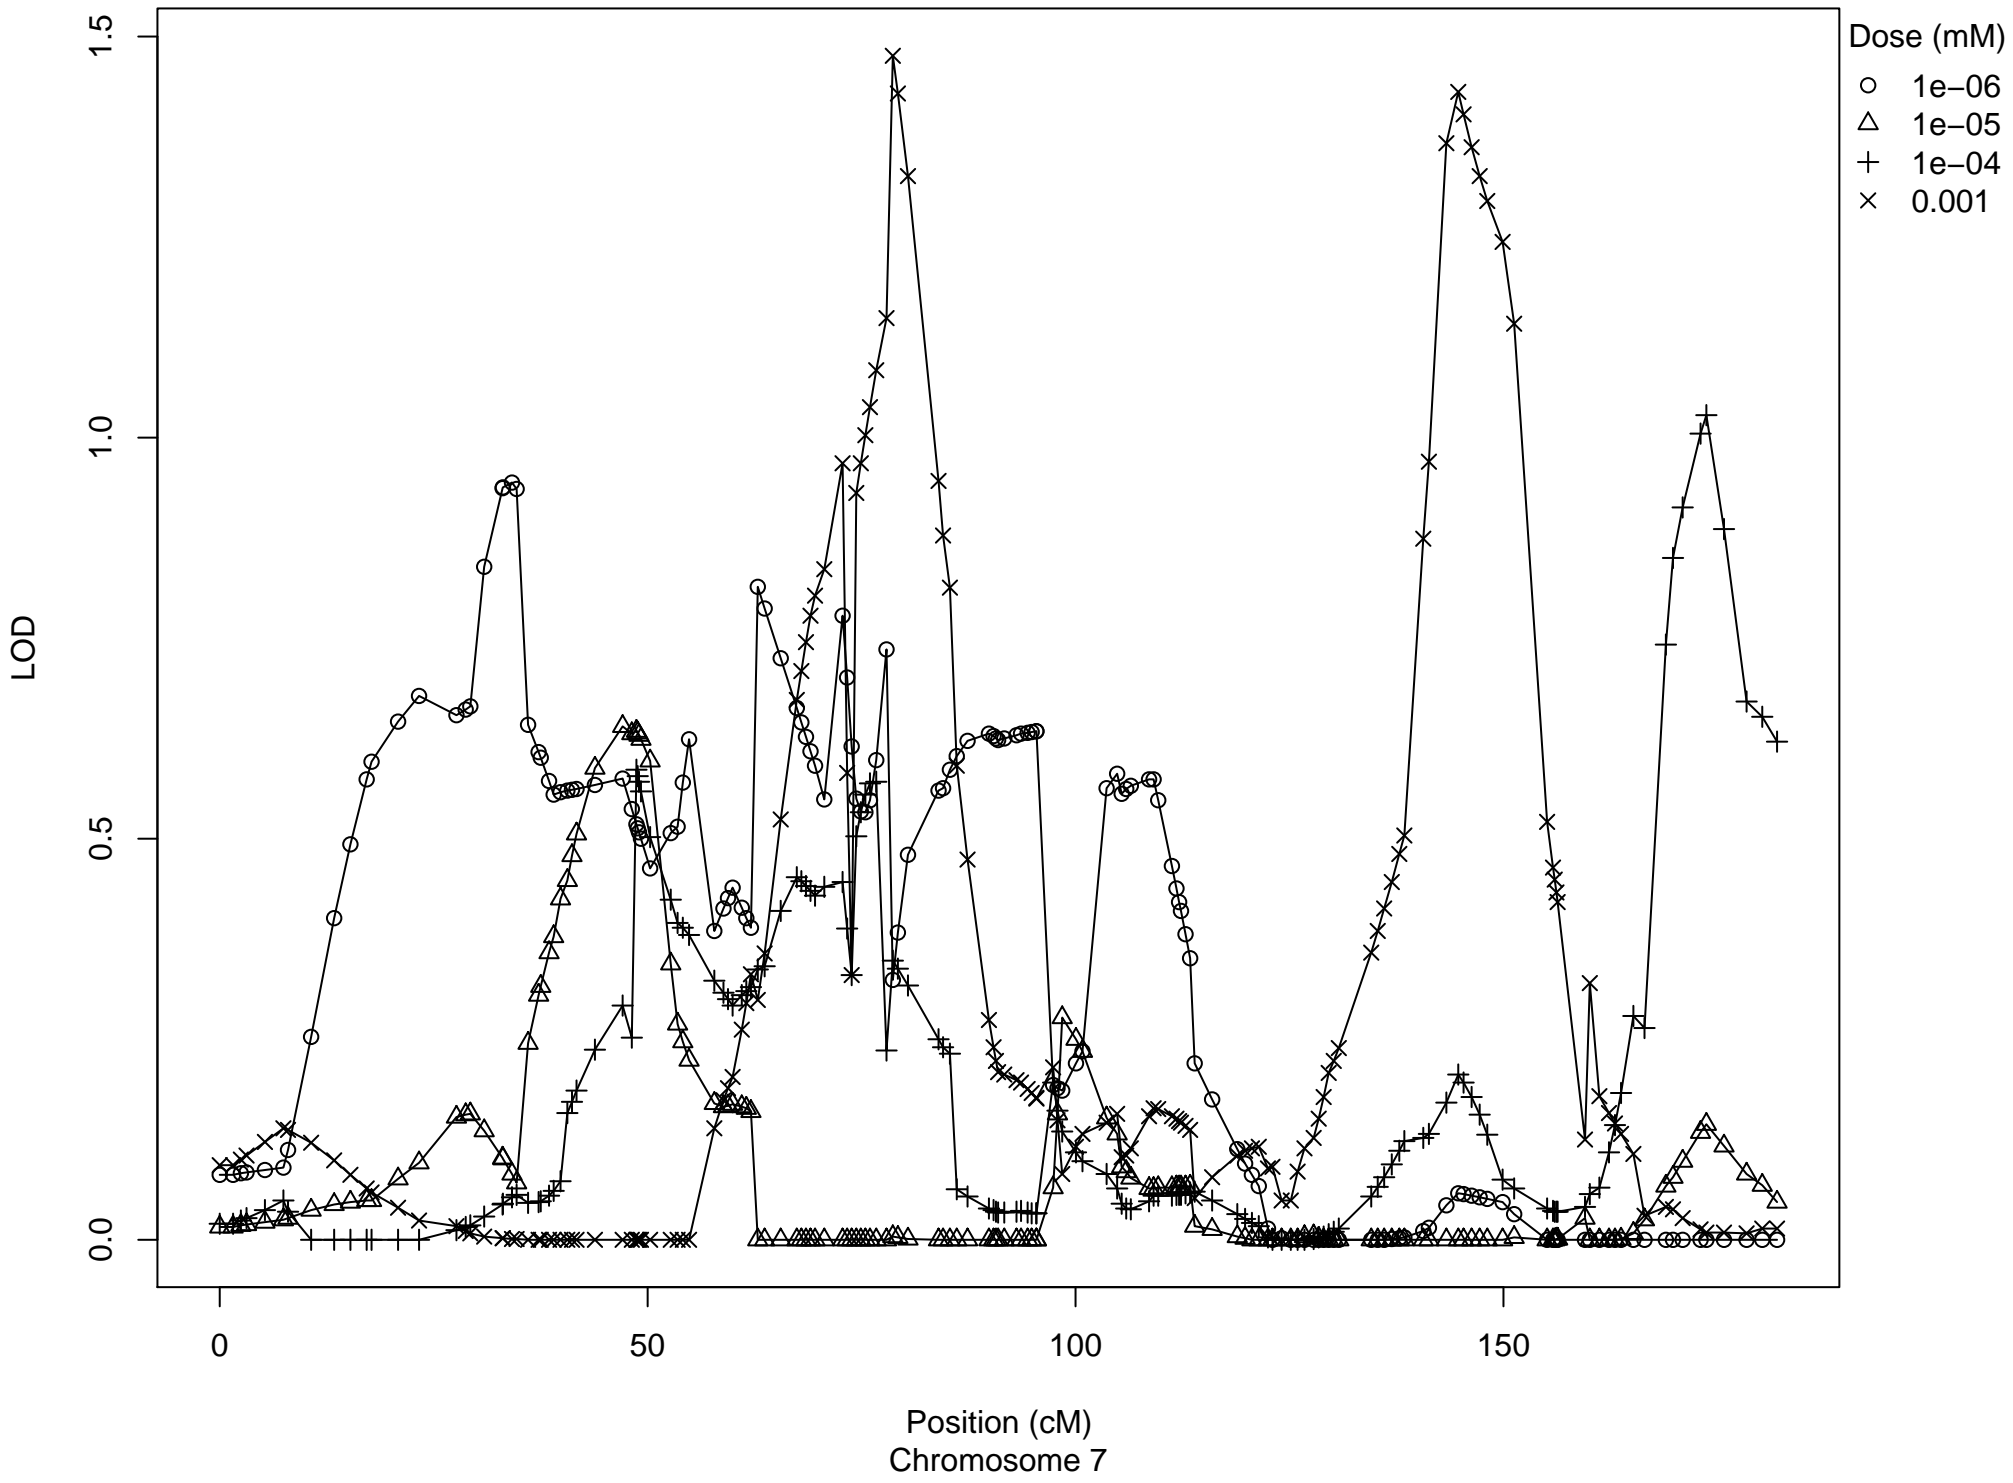

# Rapamycin (Rapa)

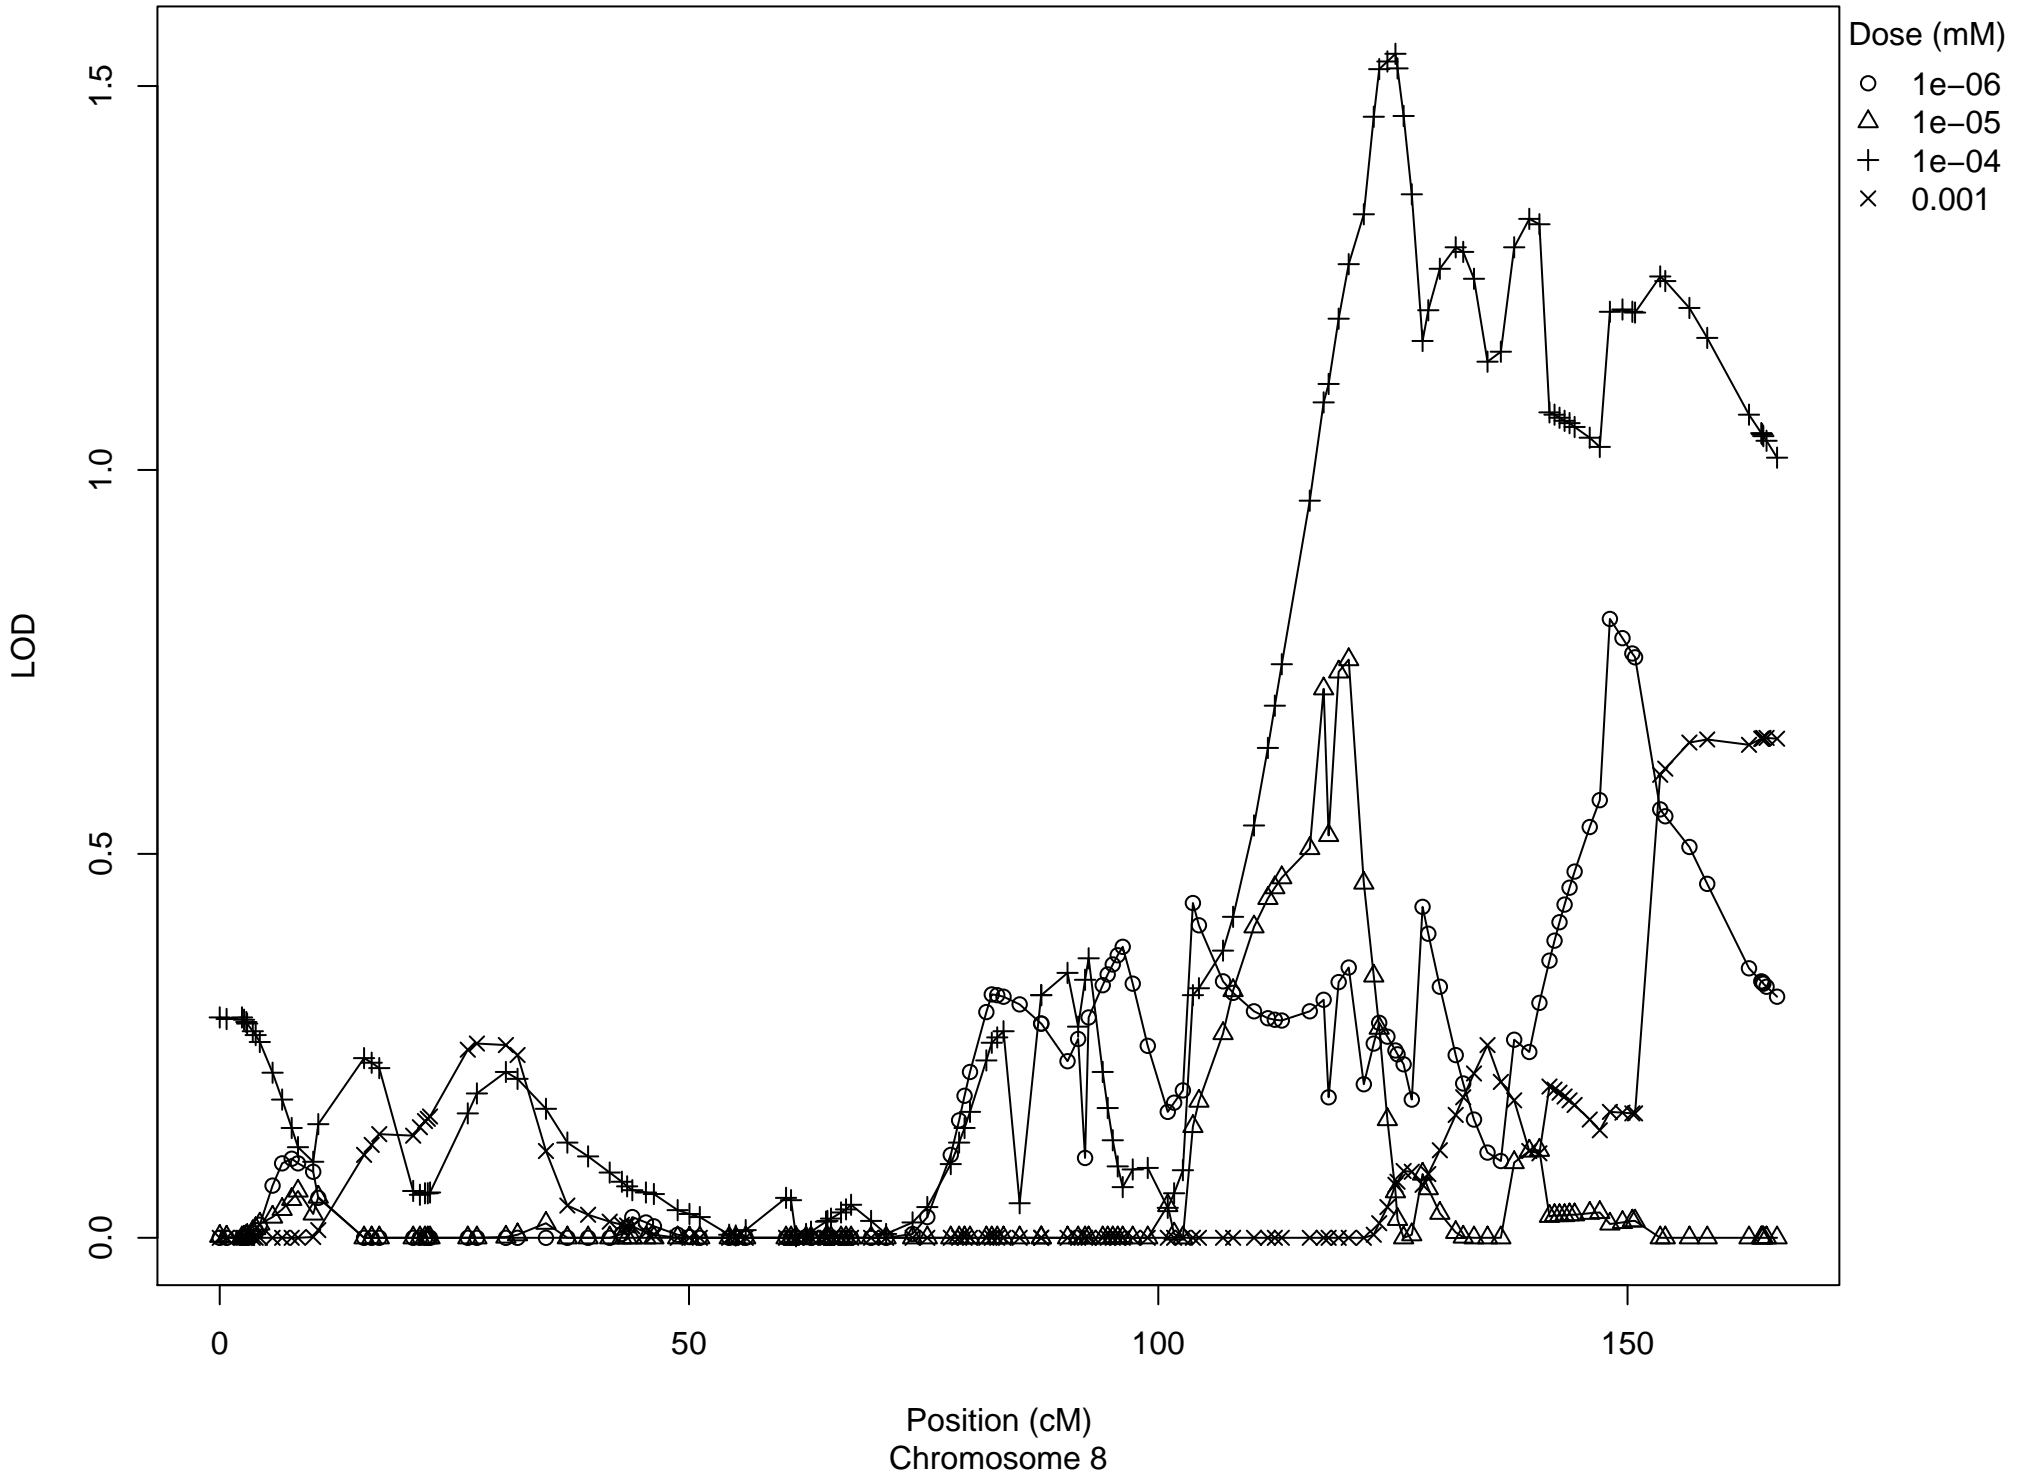

# Rapamycin (Rapa)

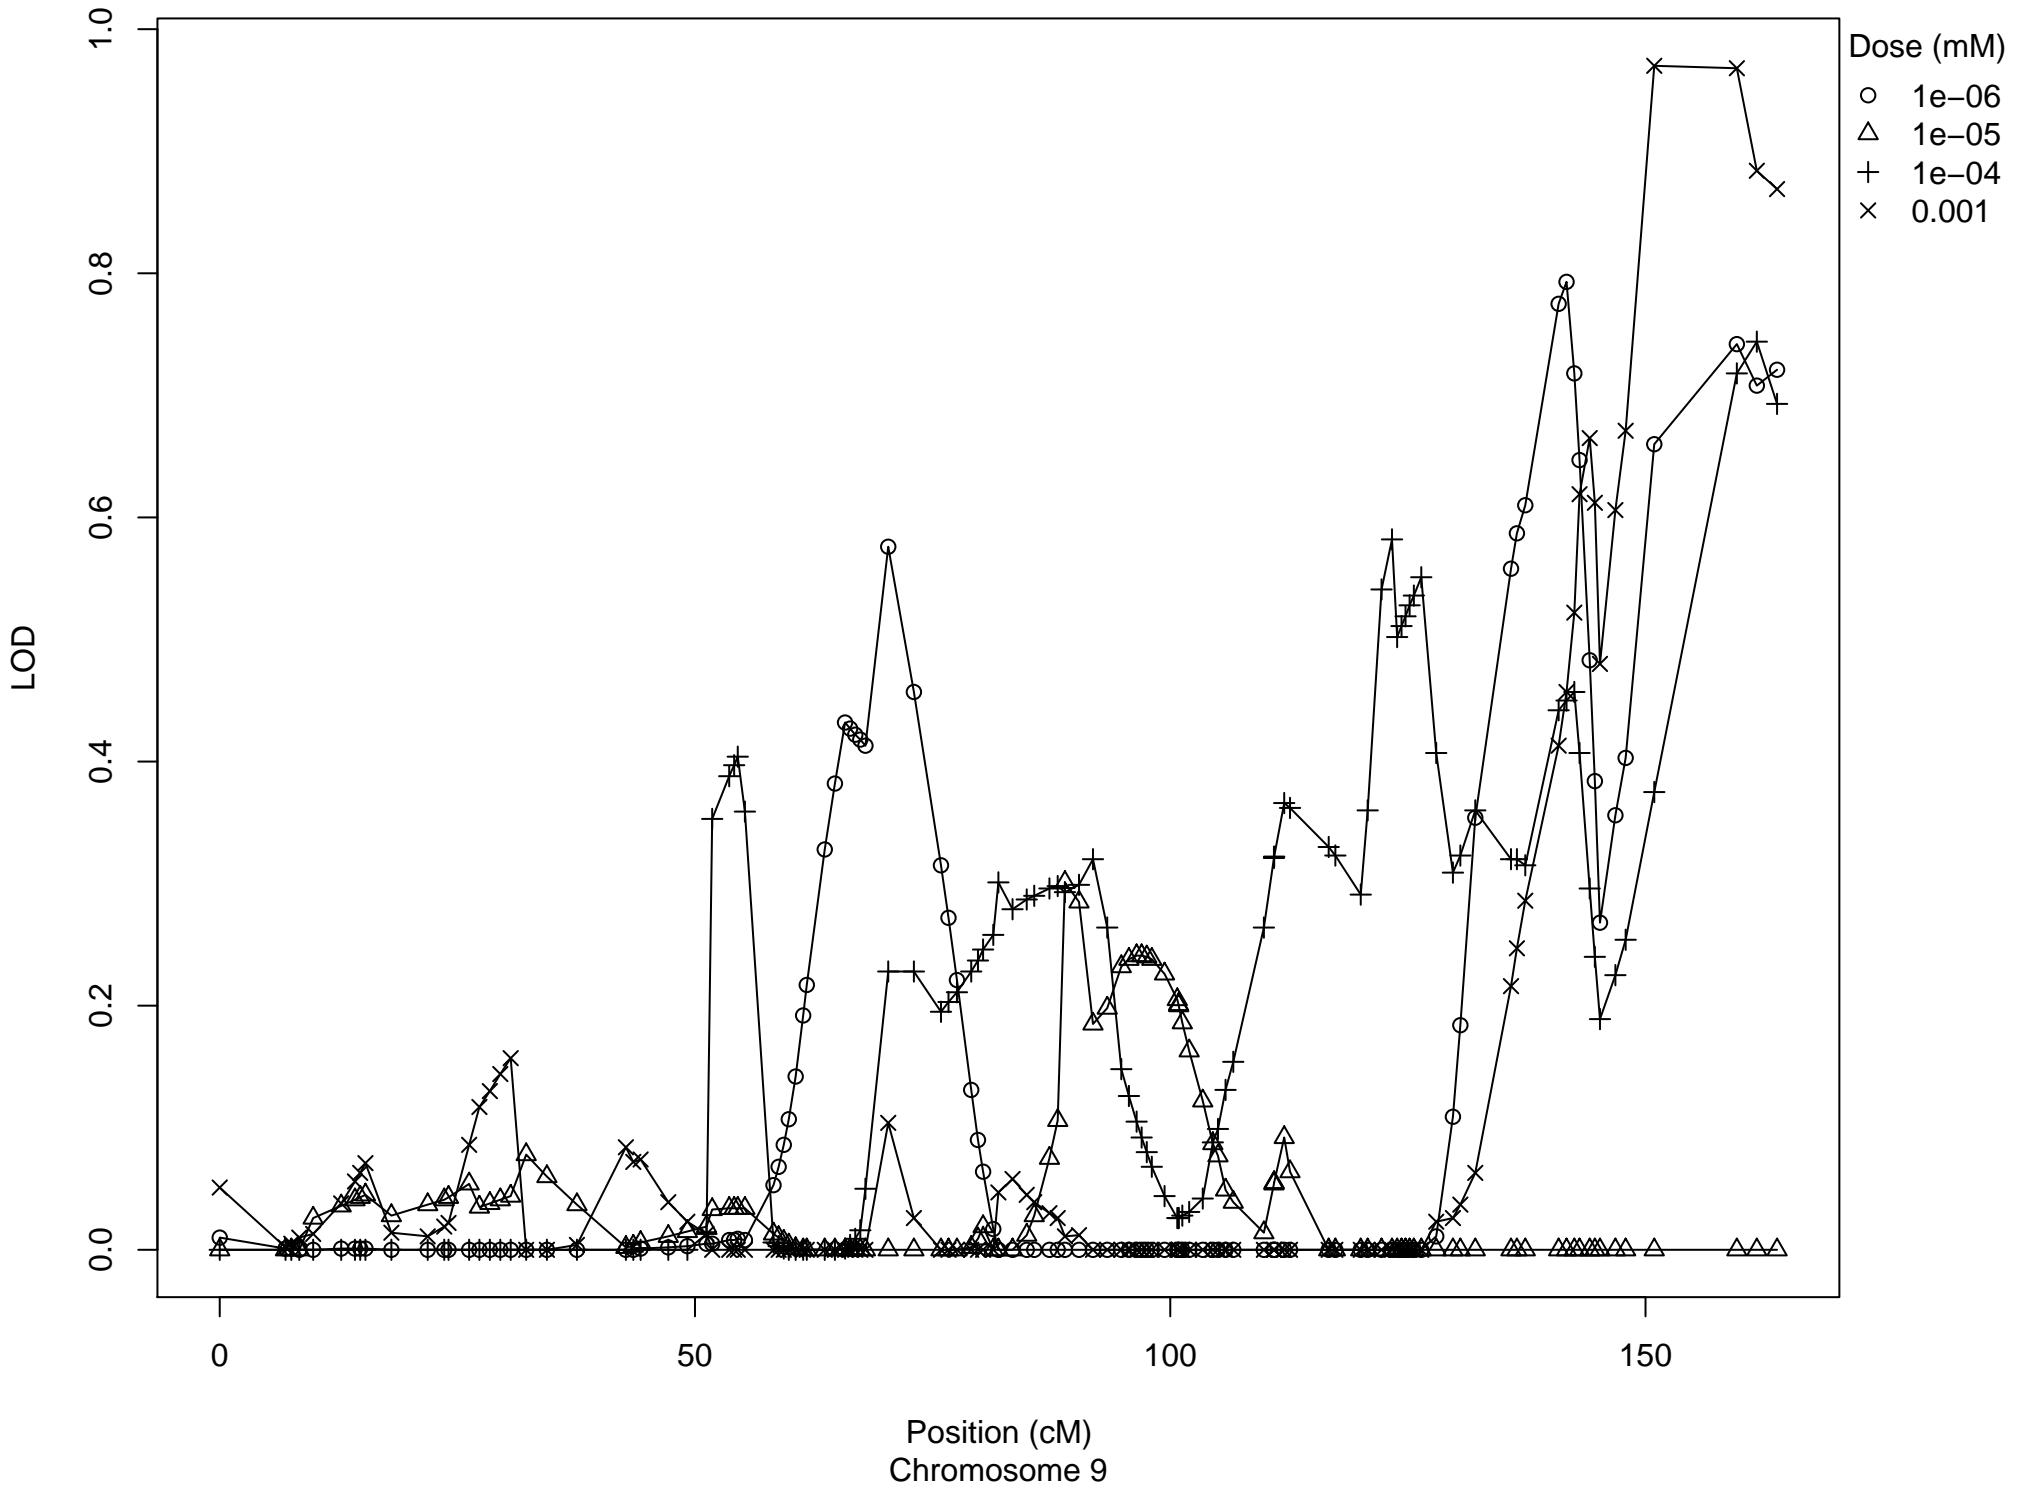

# Rapamycin (Rapa)

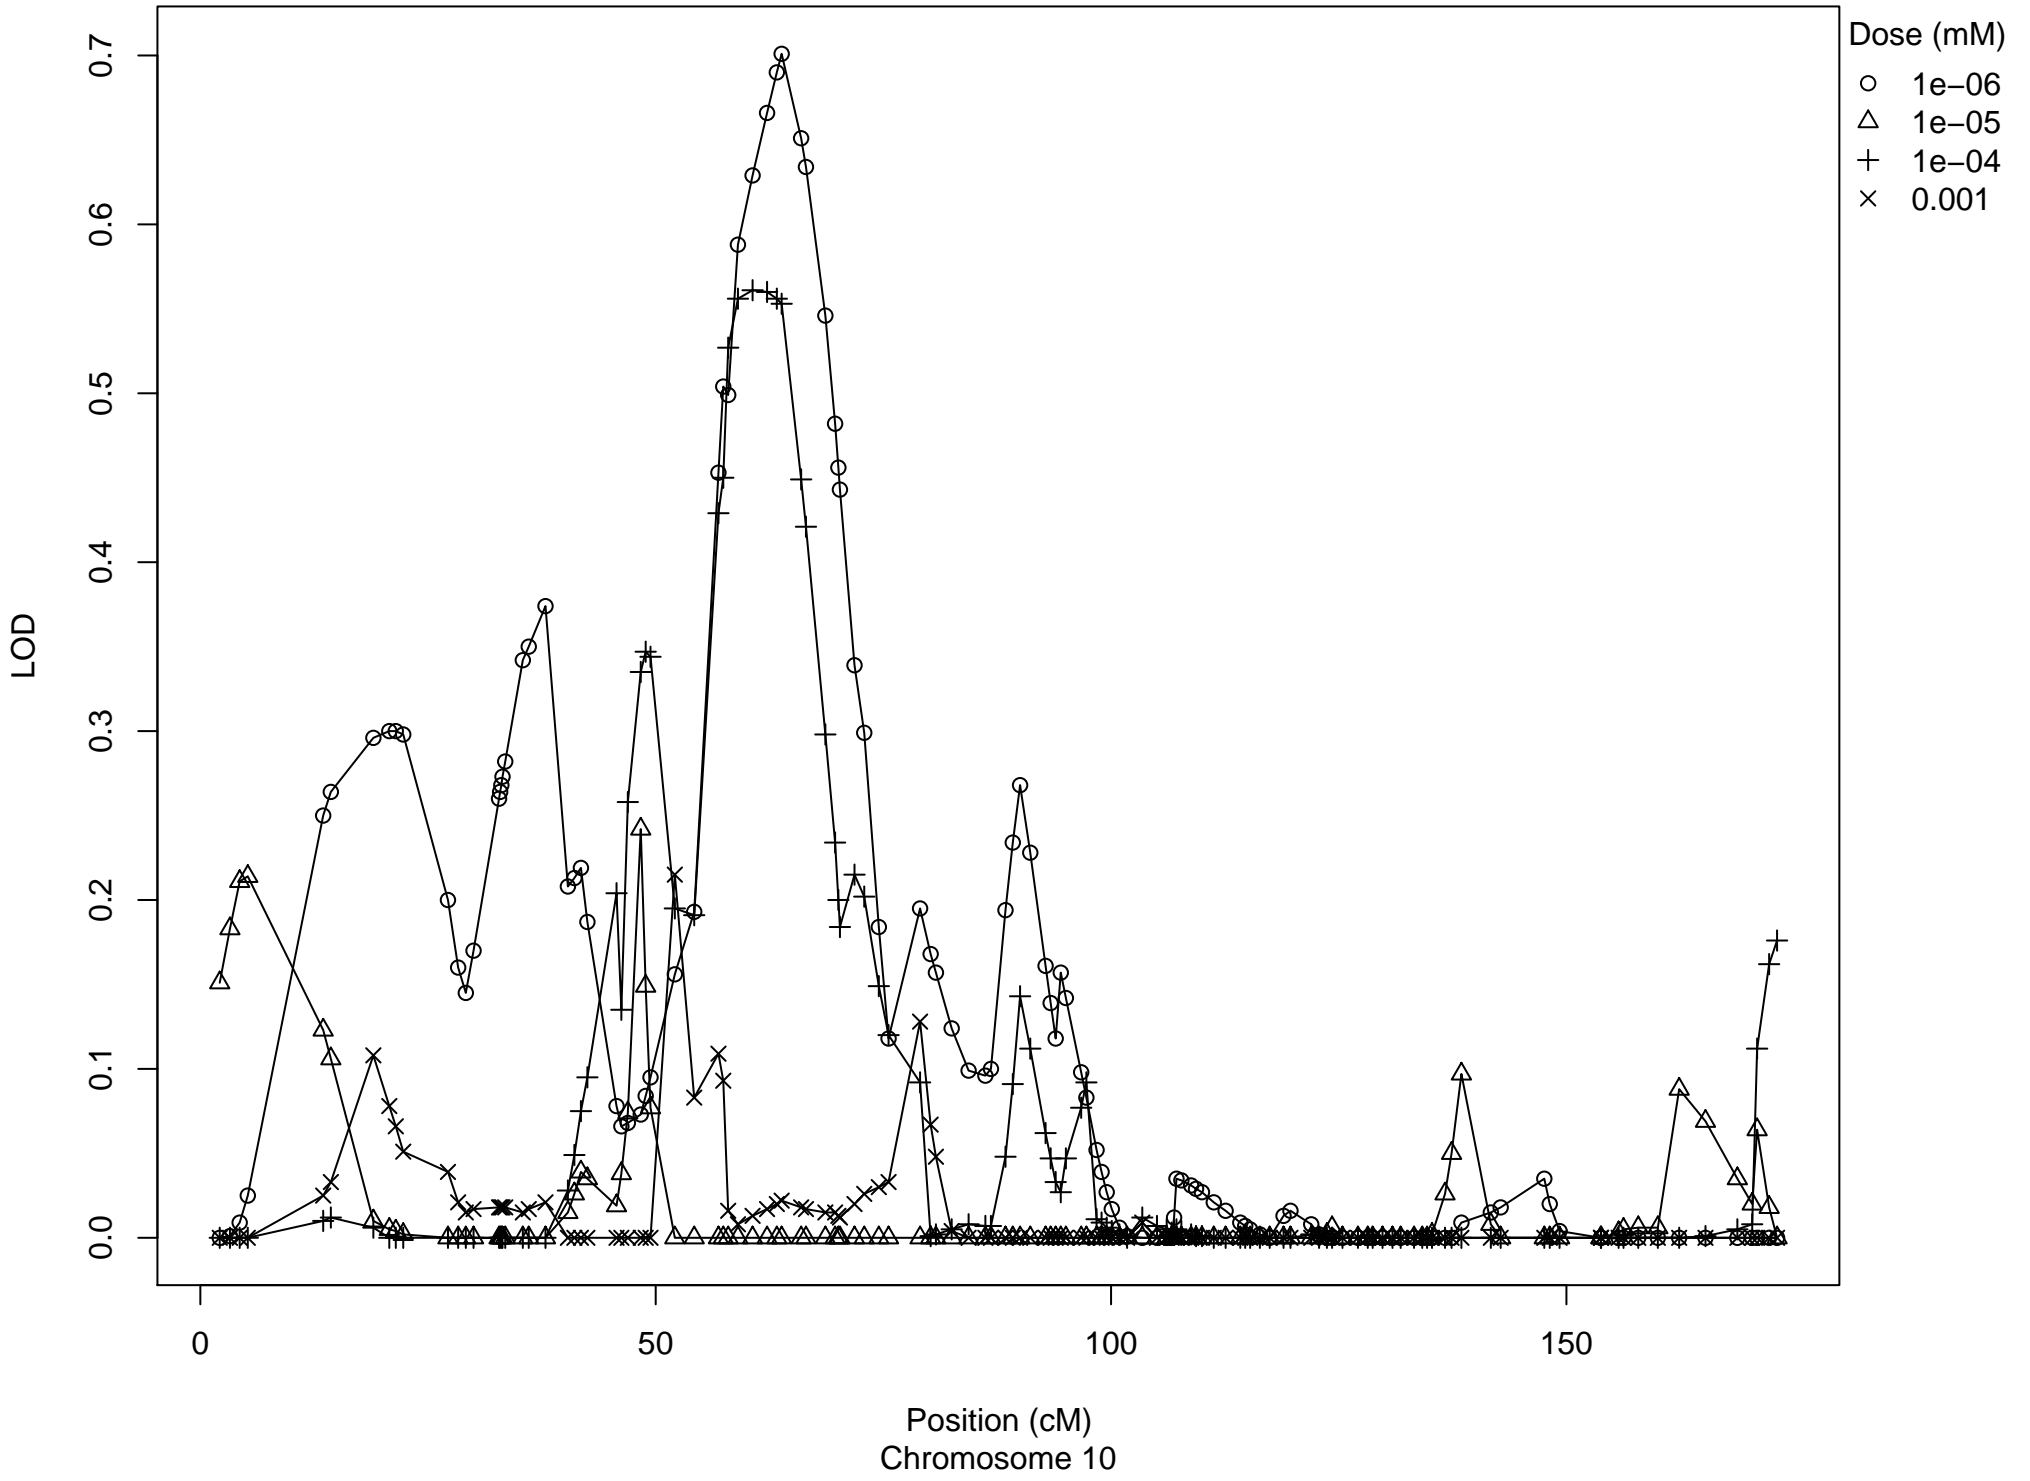

# Rapamycin (Rapa)

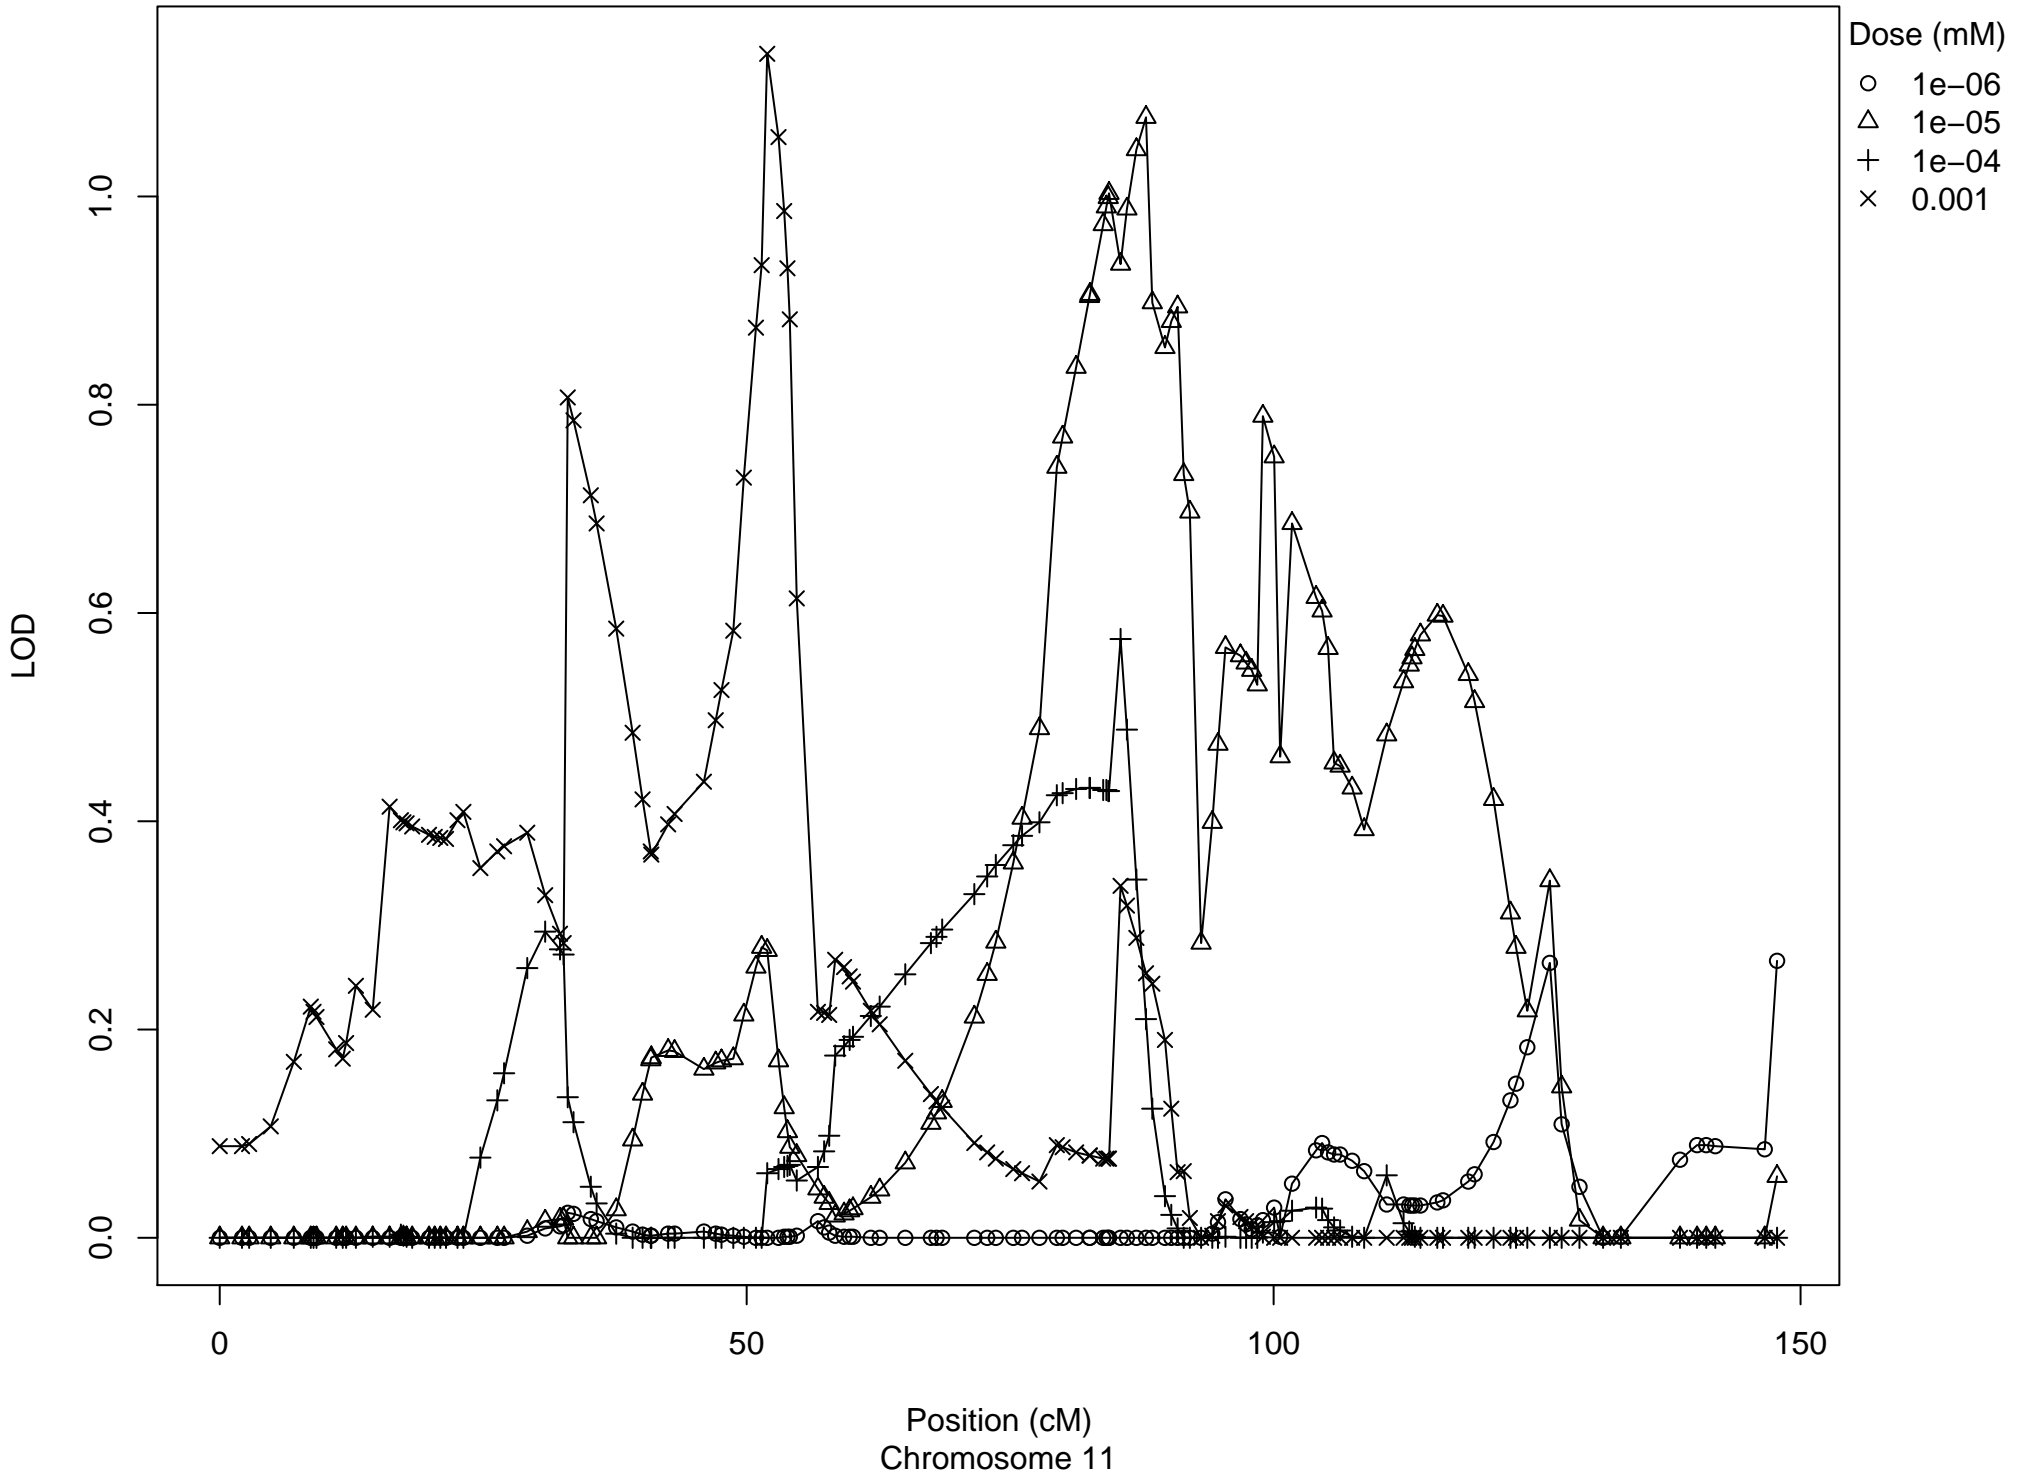

# Rapamycin (Rapa)

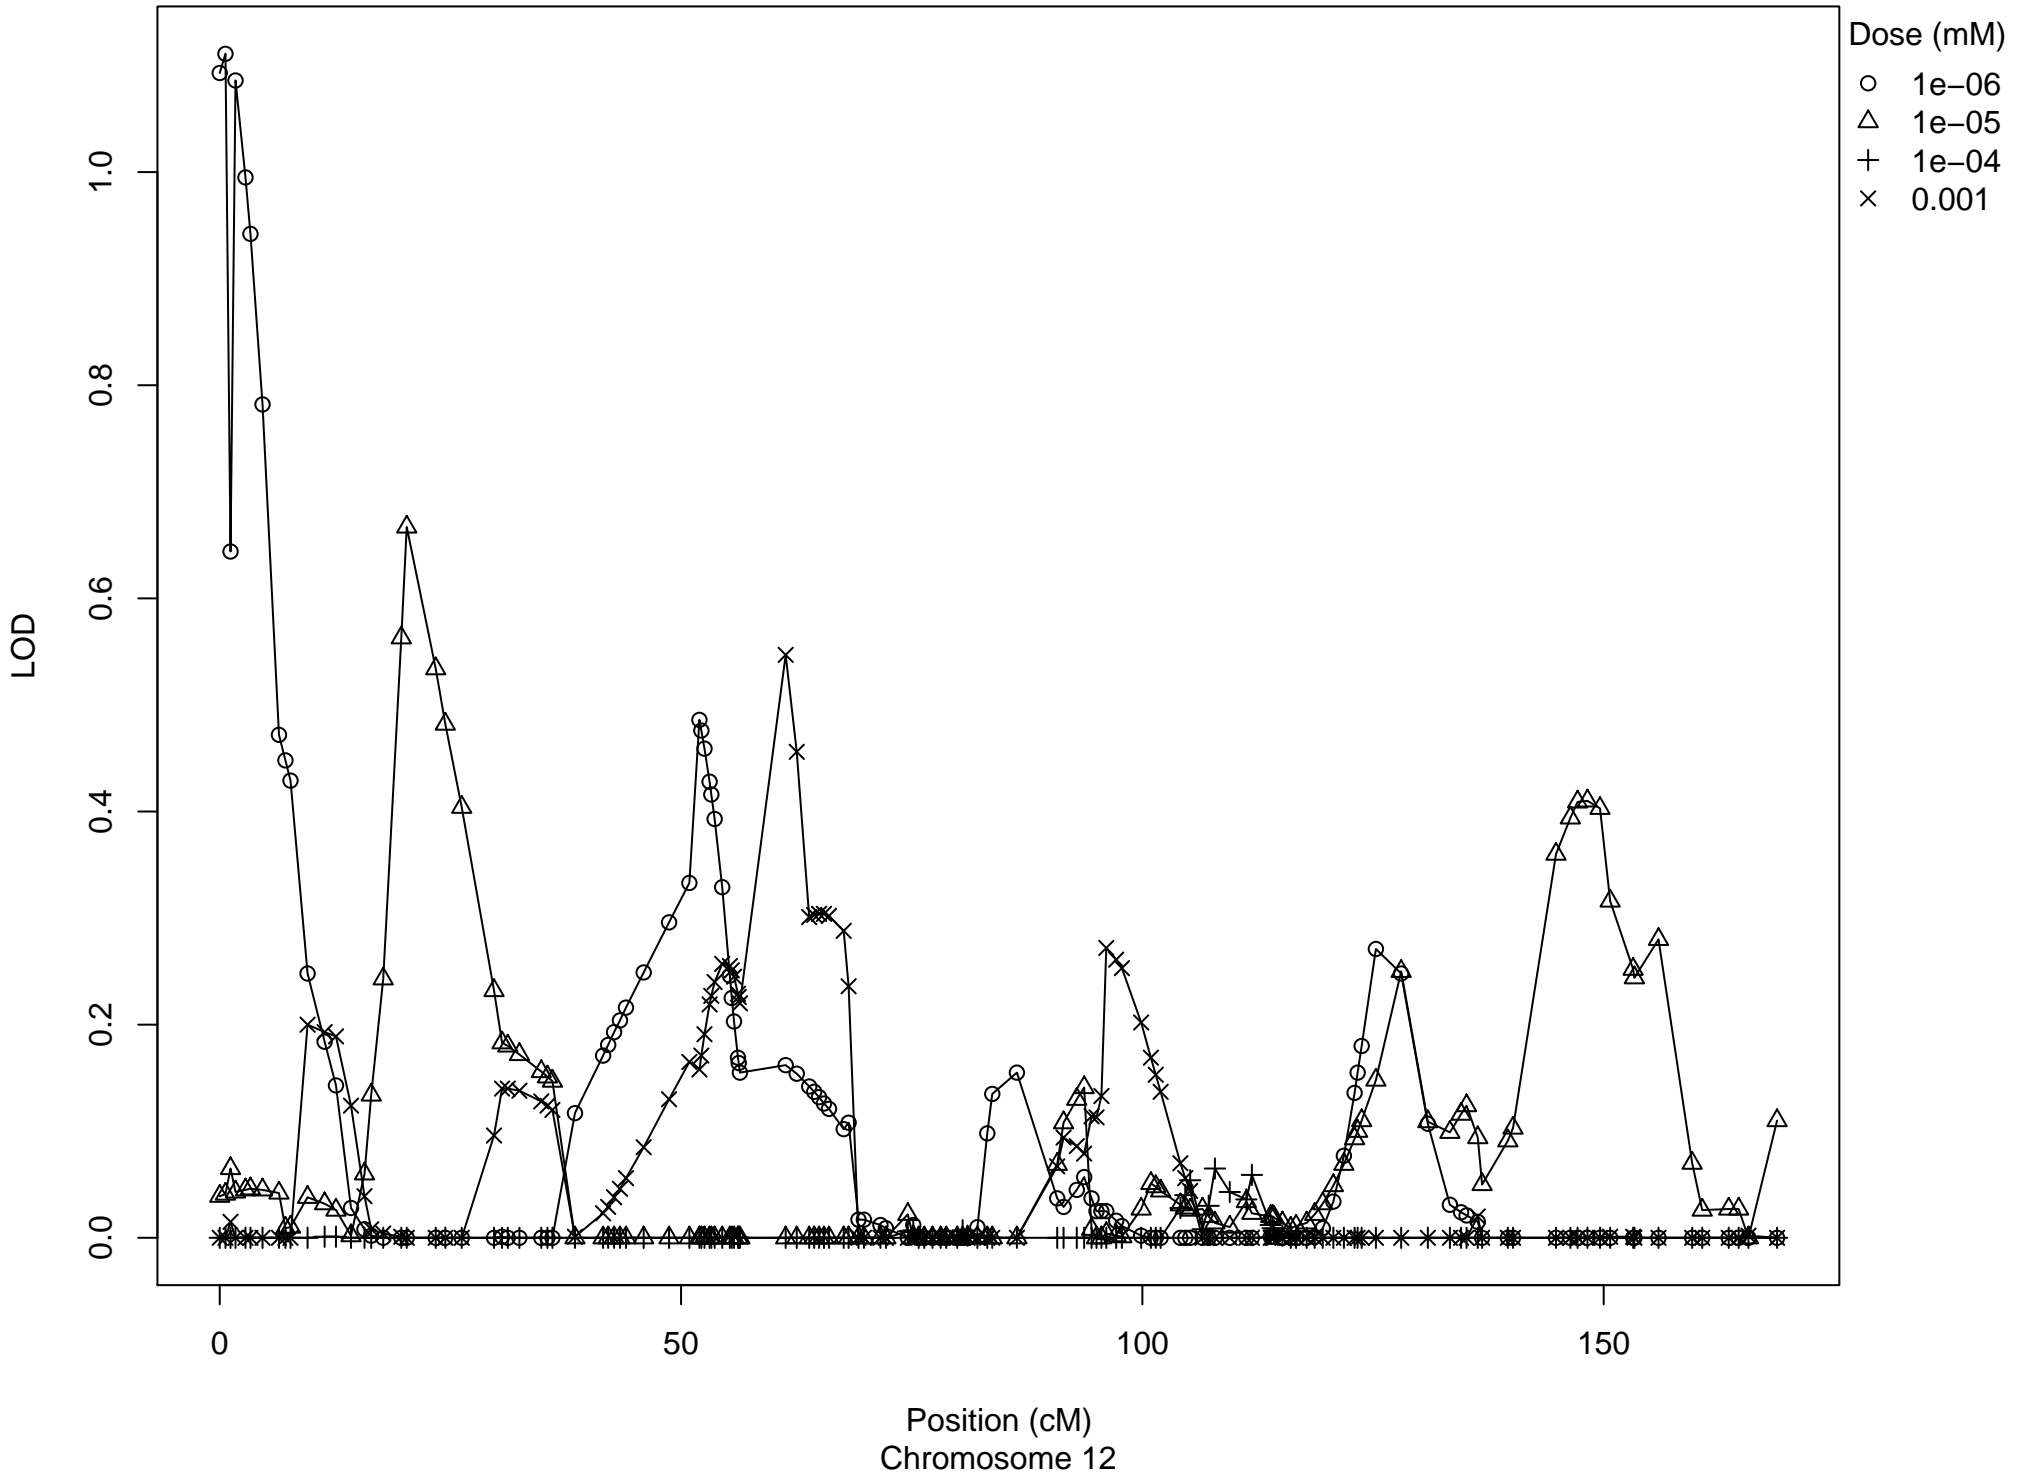



# Rapamycin (Rapa)

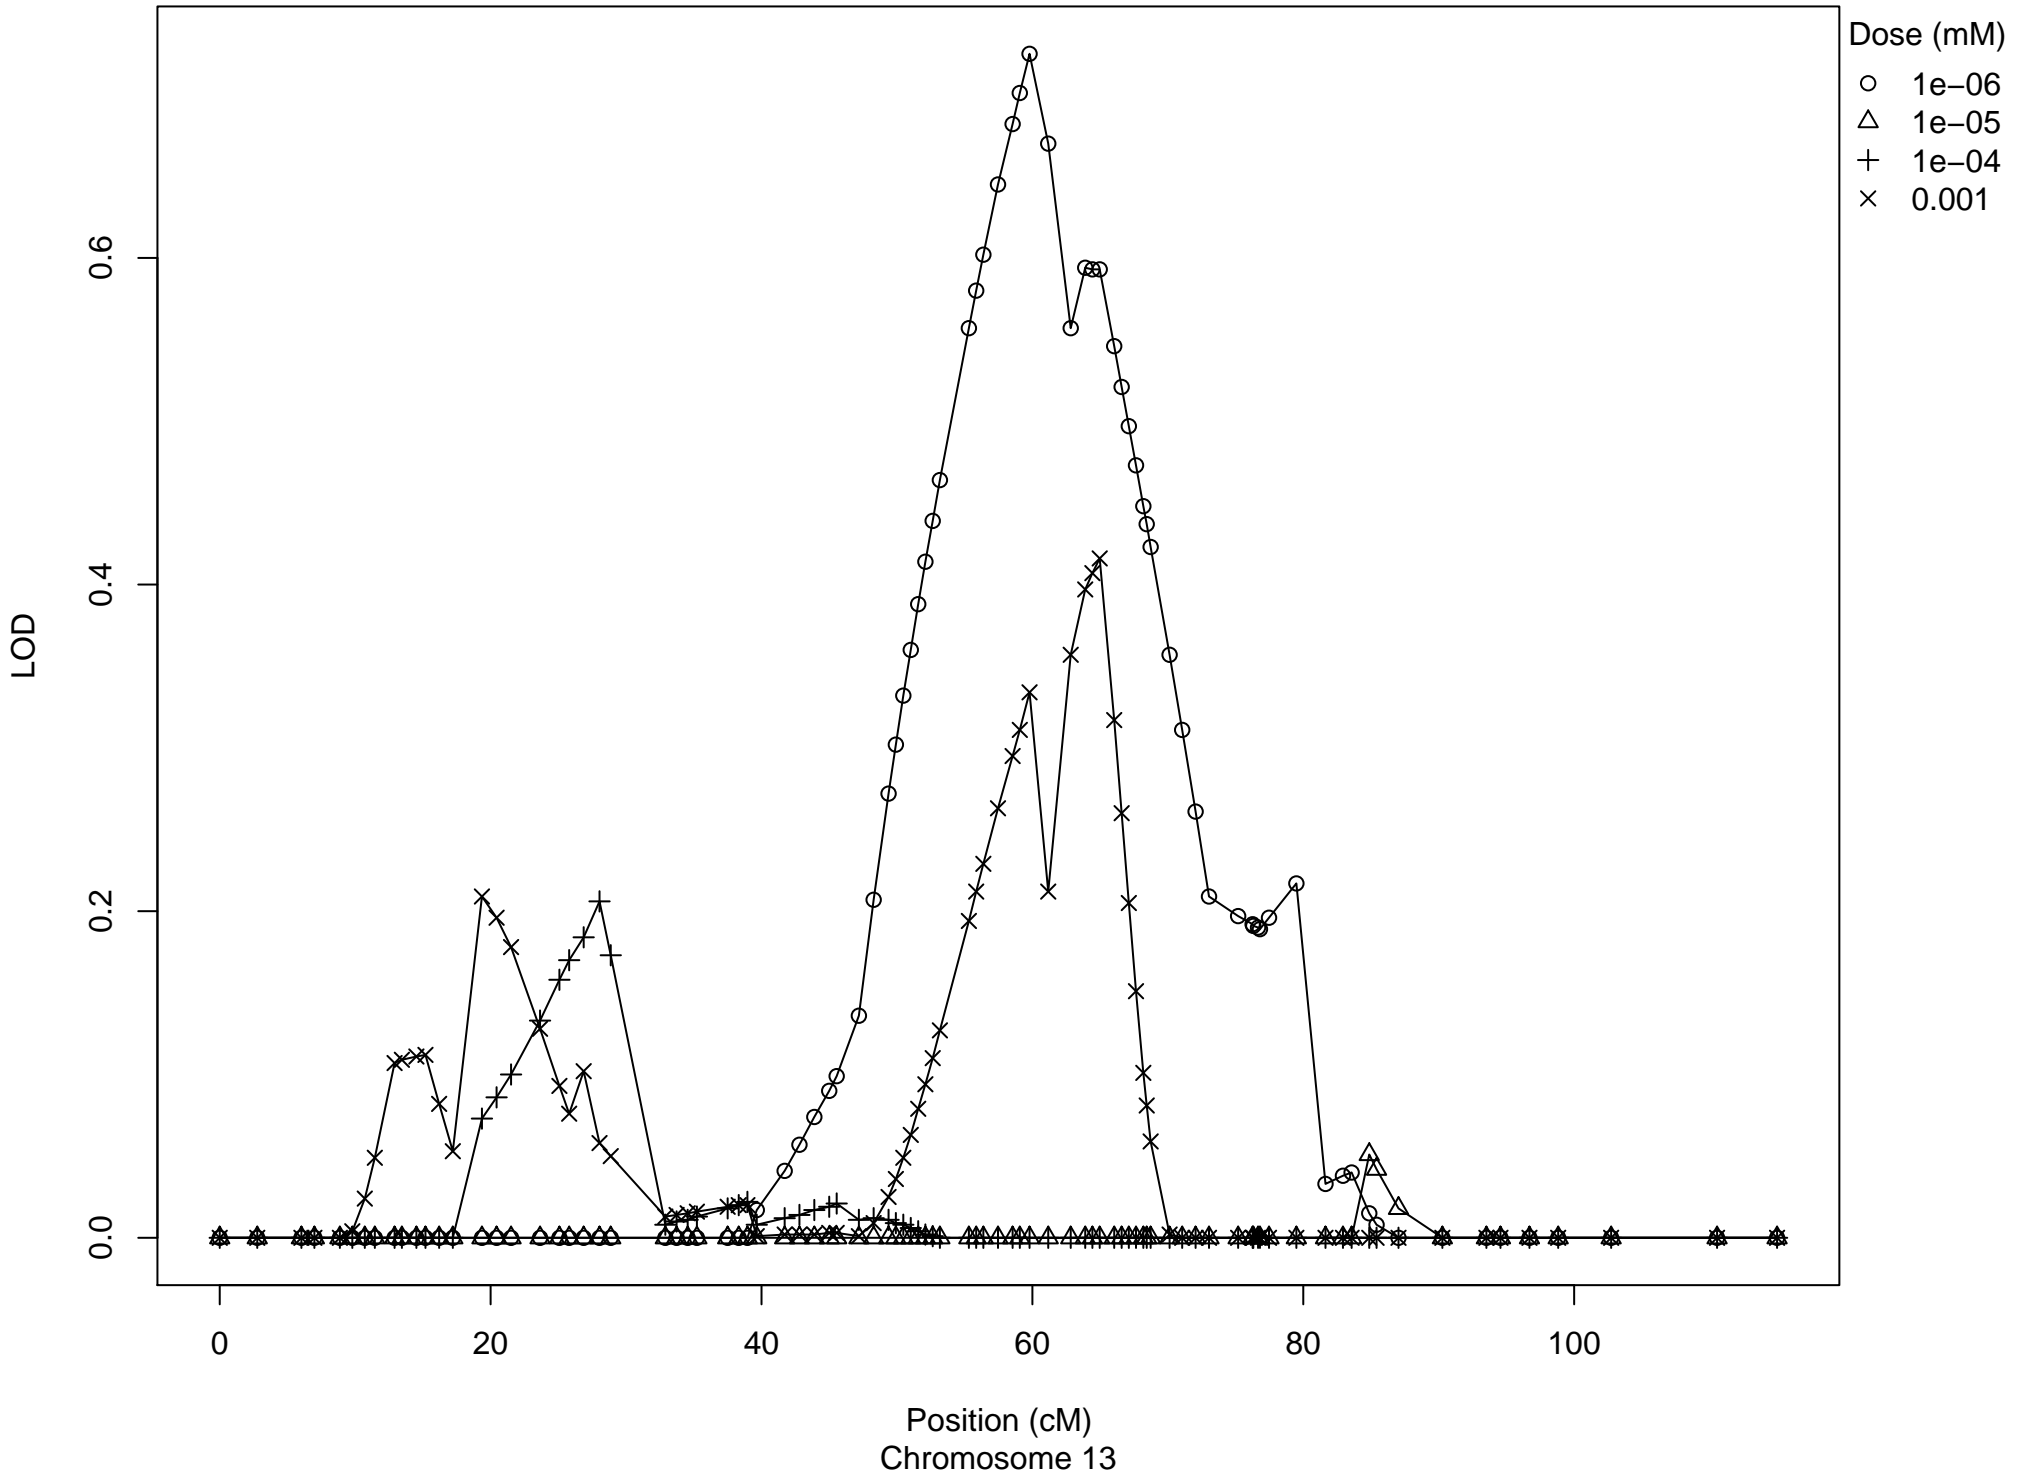

# Rapamycin (Rapa)

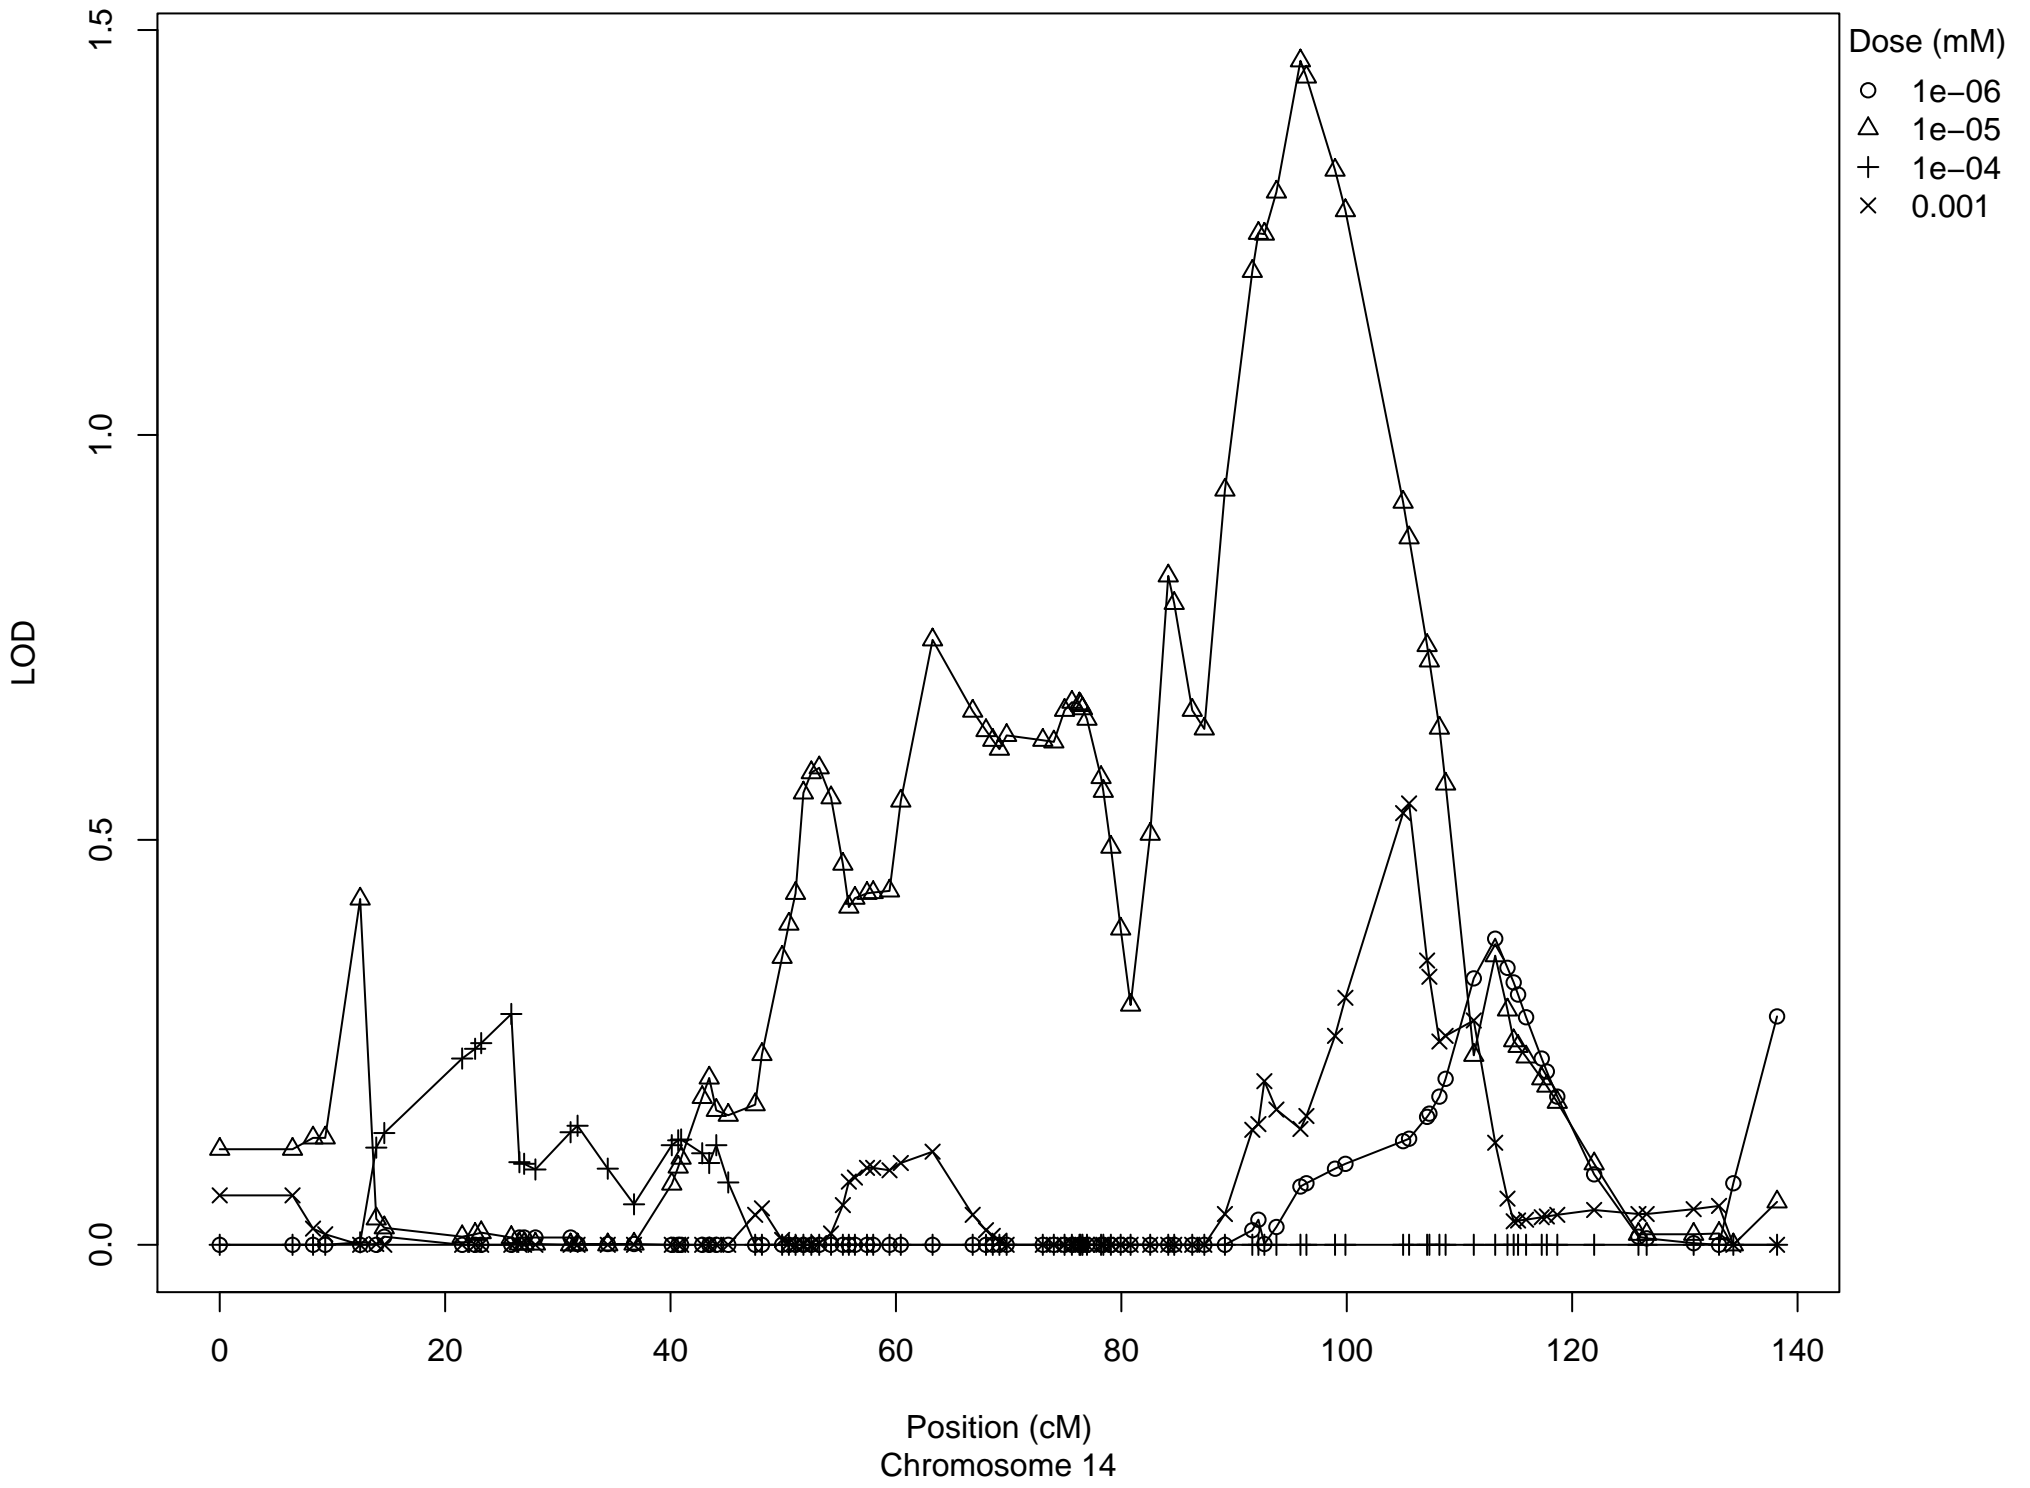

# Rapamycin (Rapa)

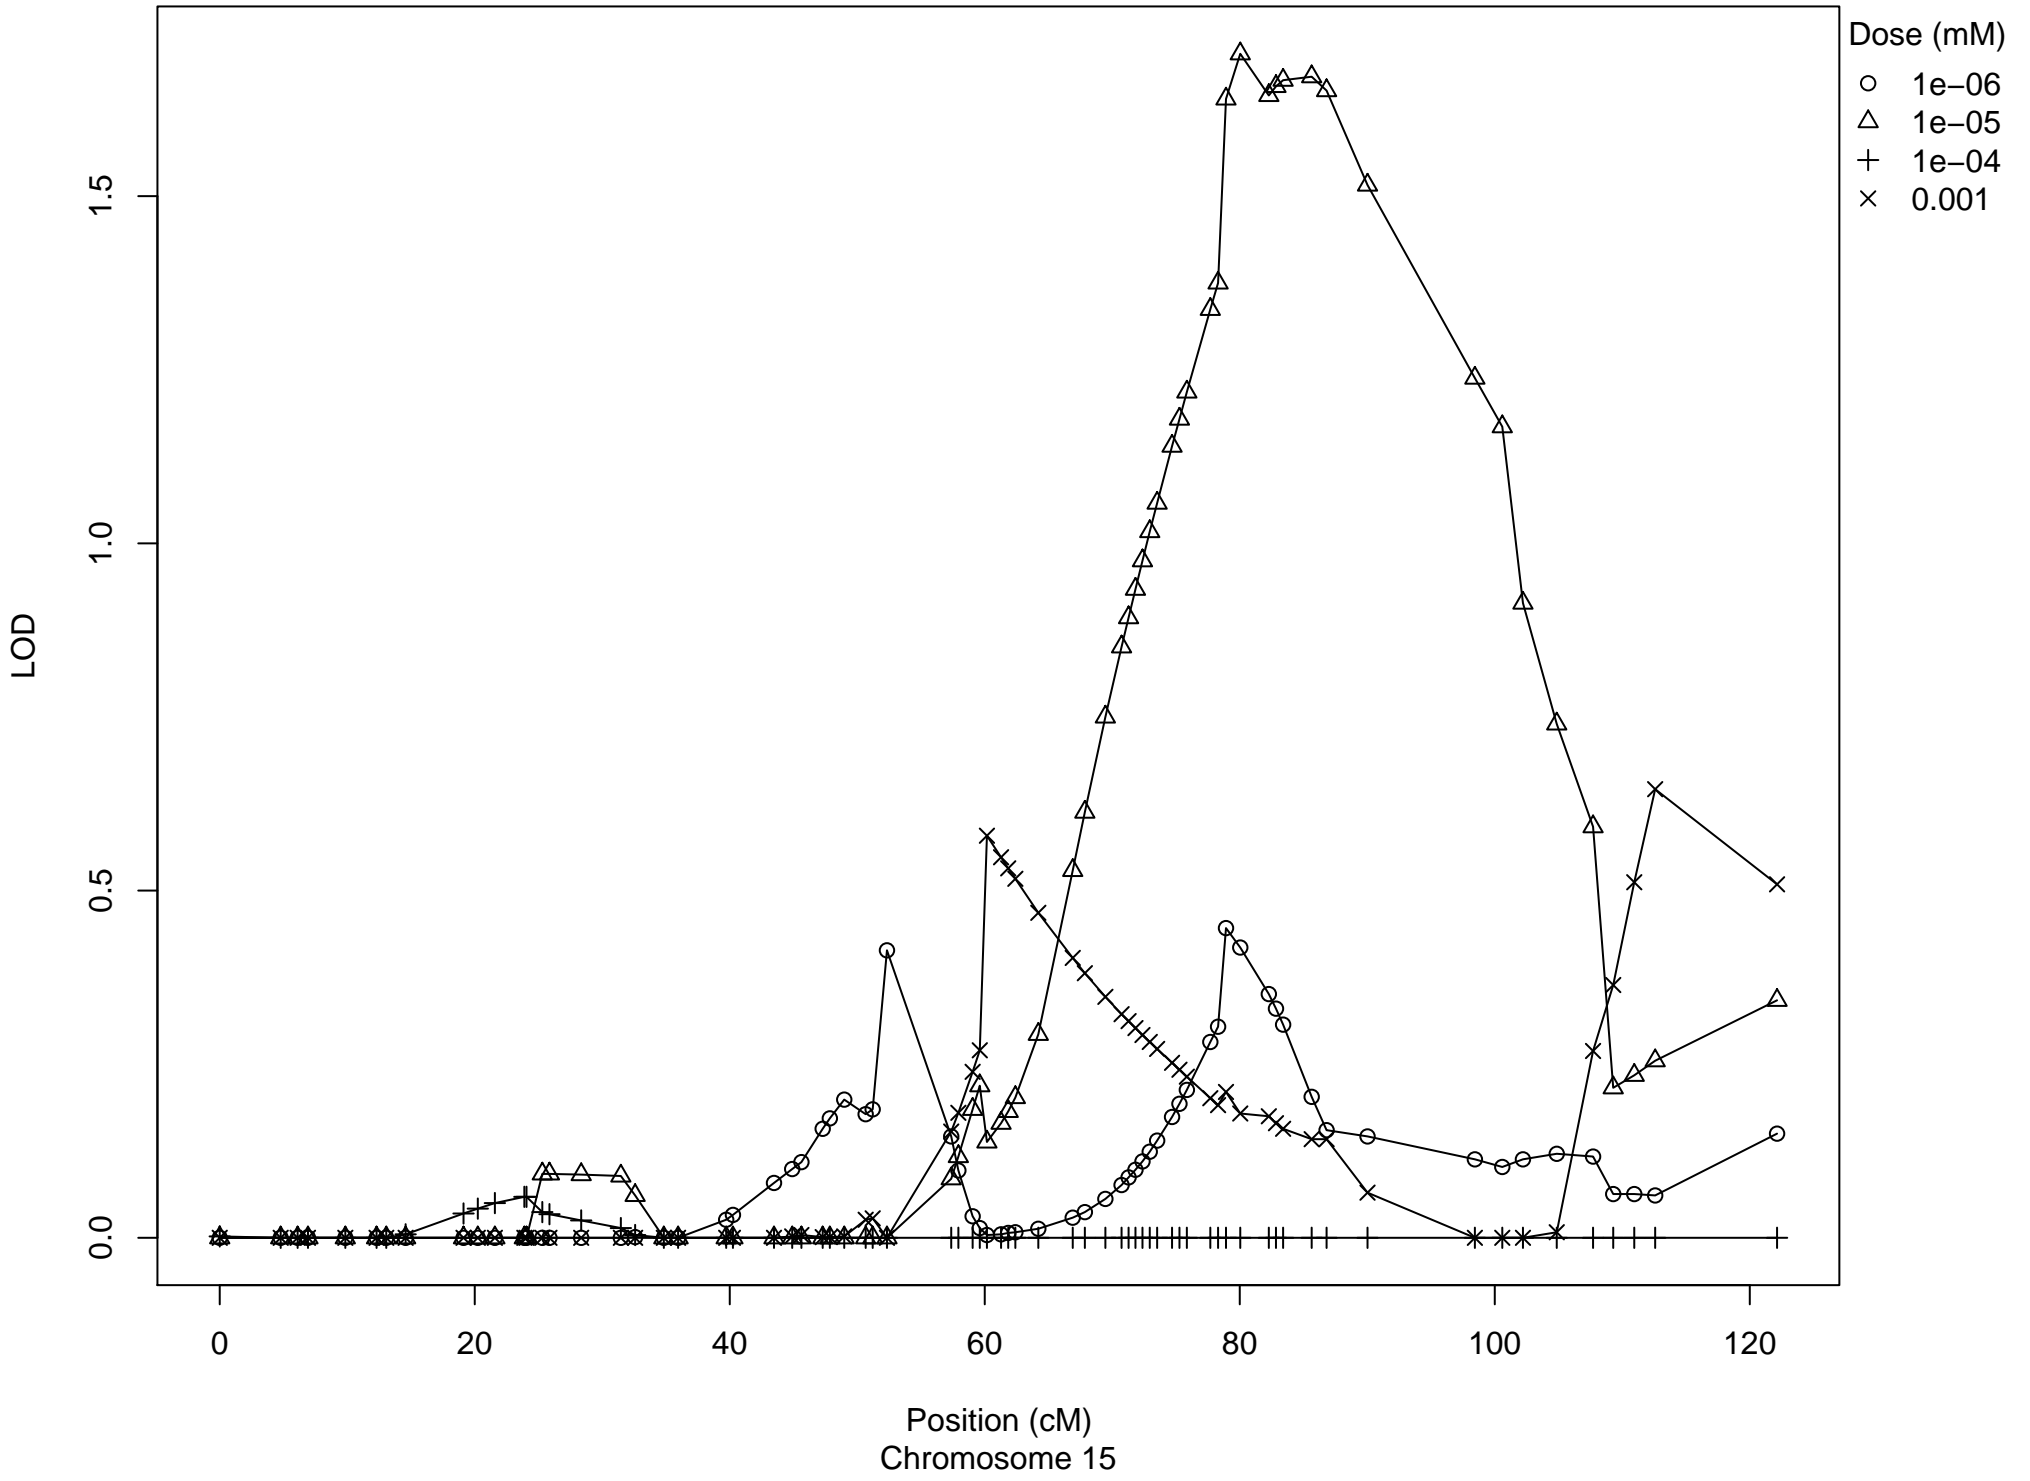

# Rapamycin (Rapa)

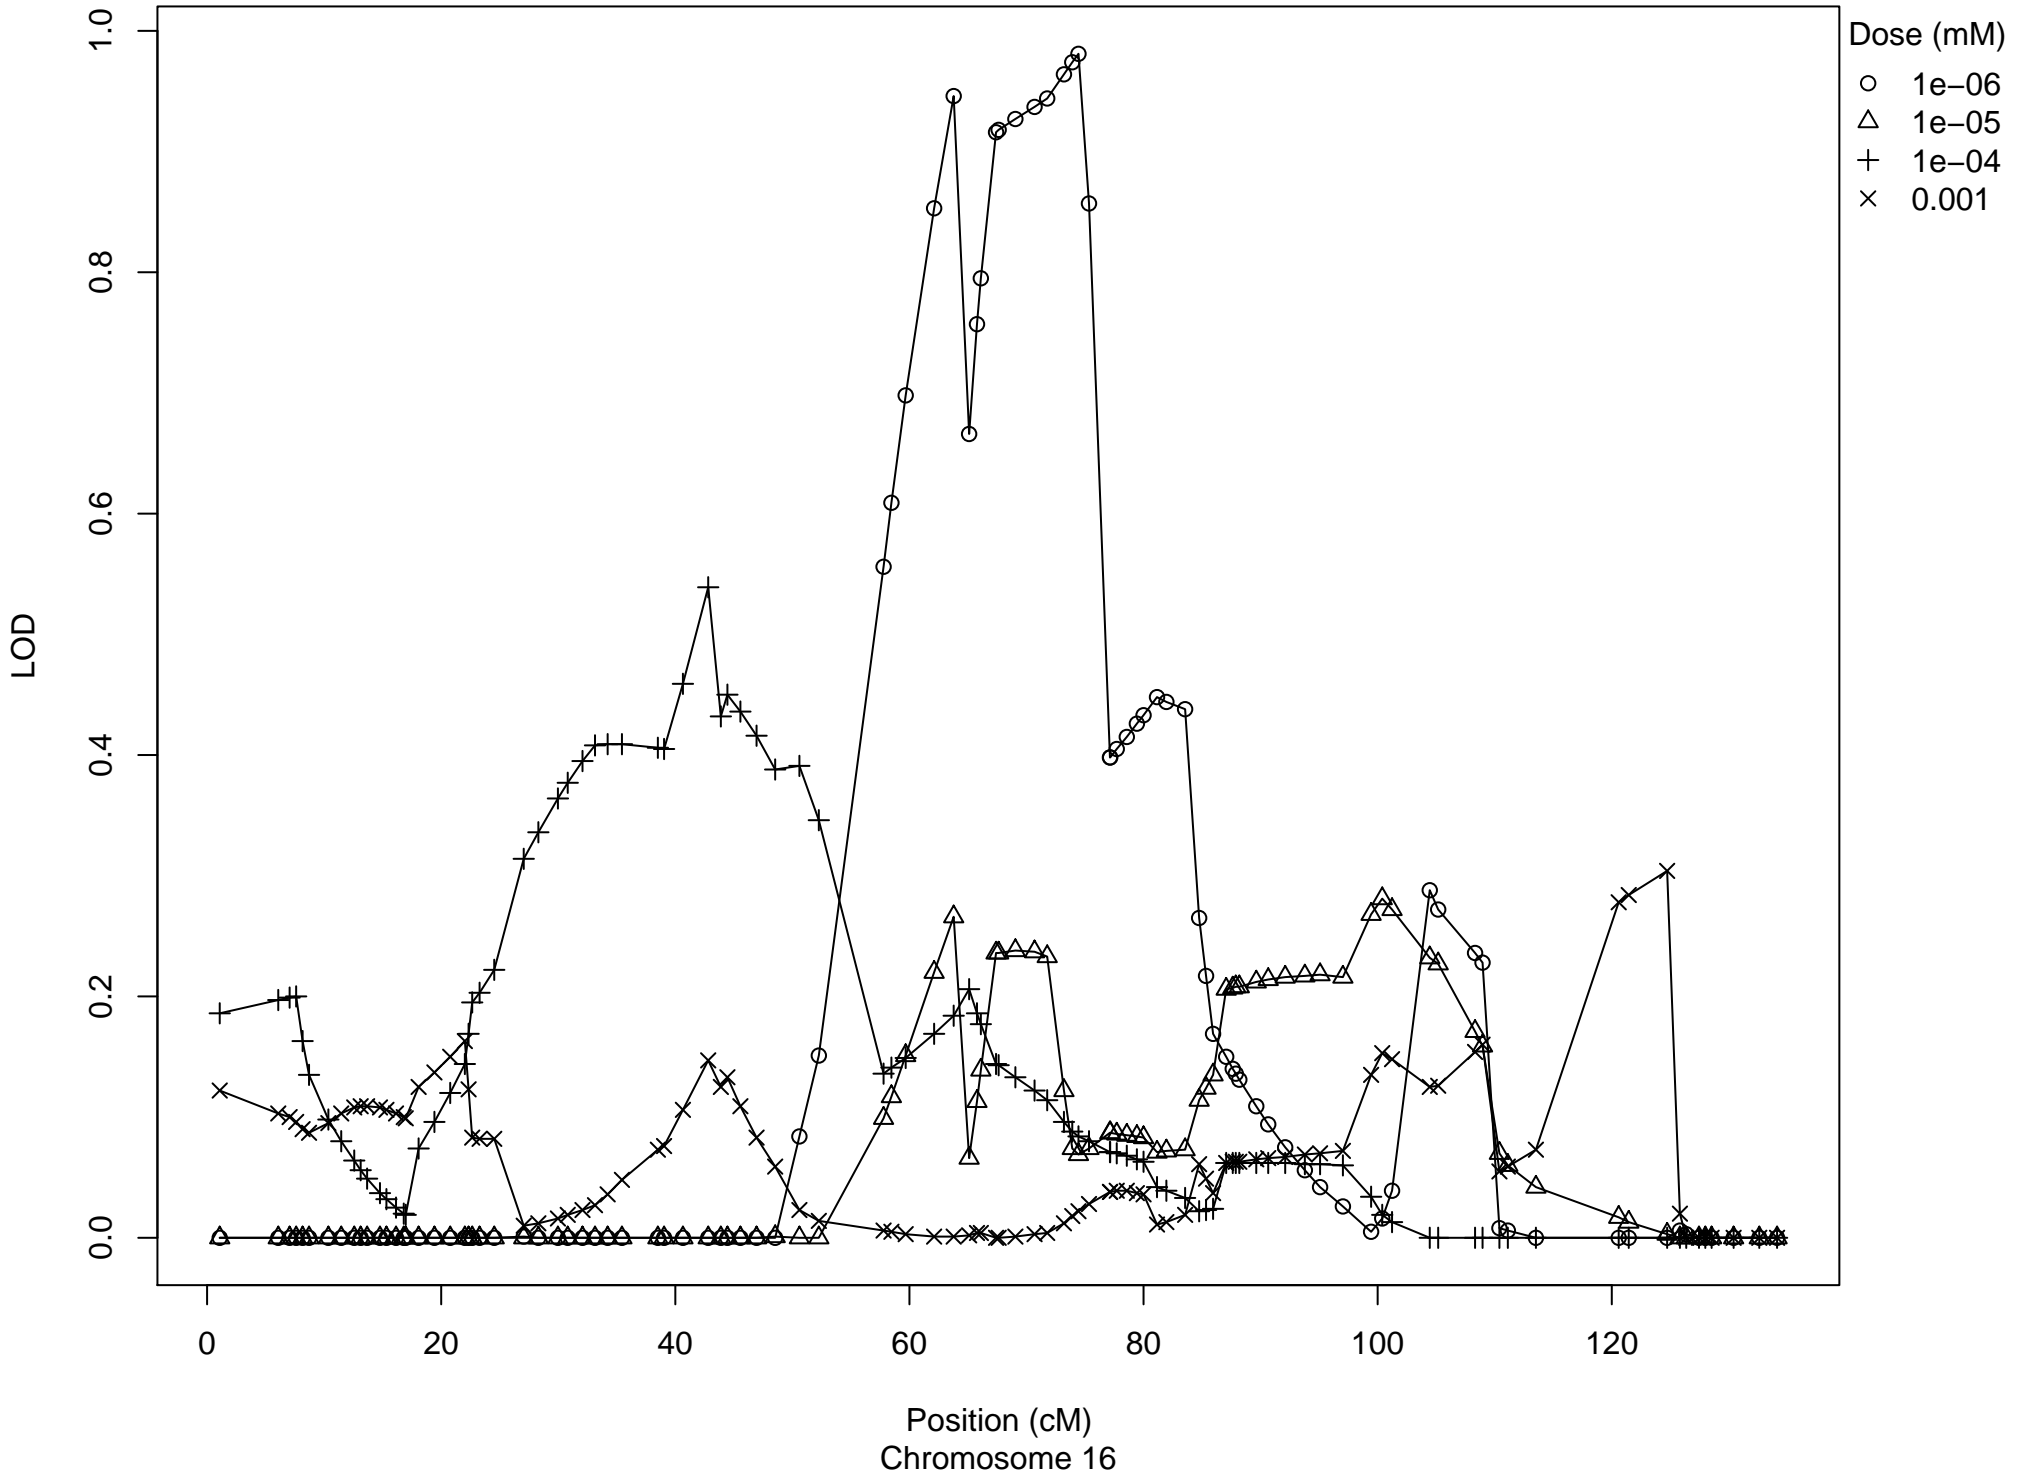

# Rapamycin (Rapa)

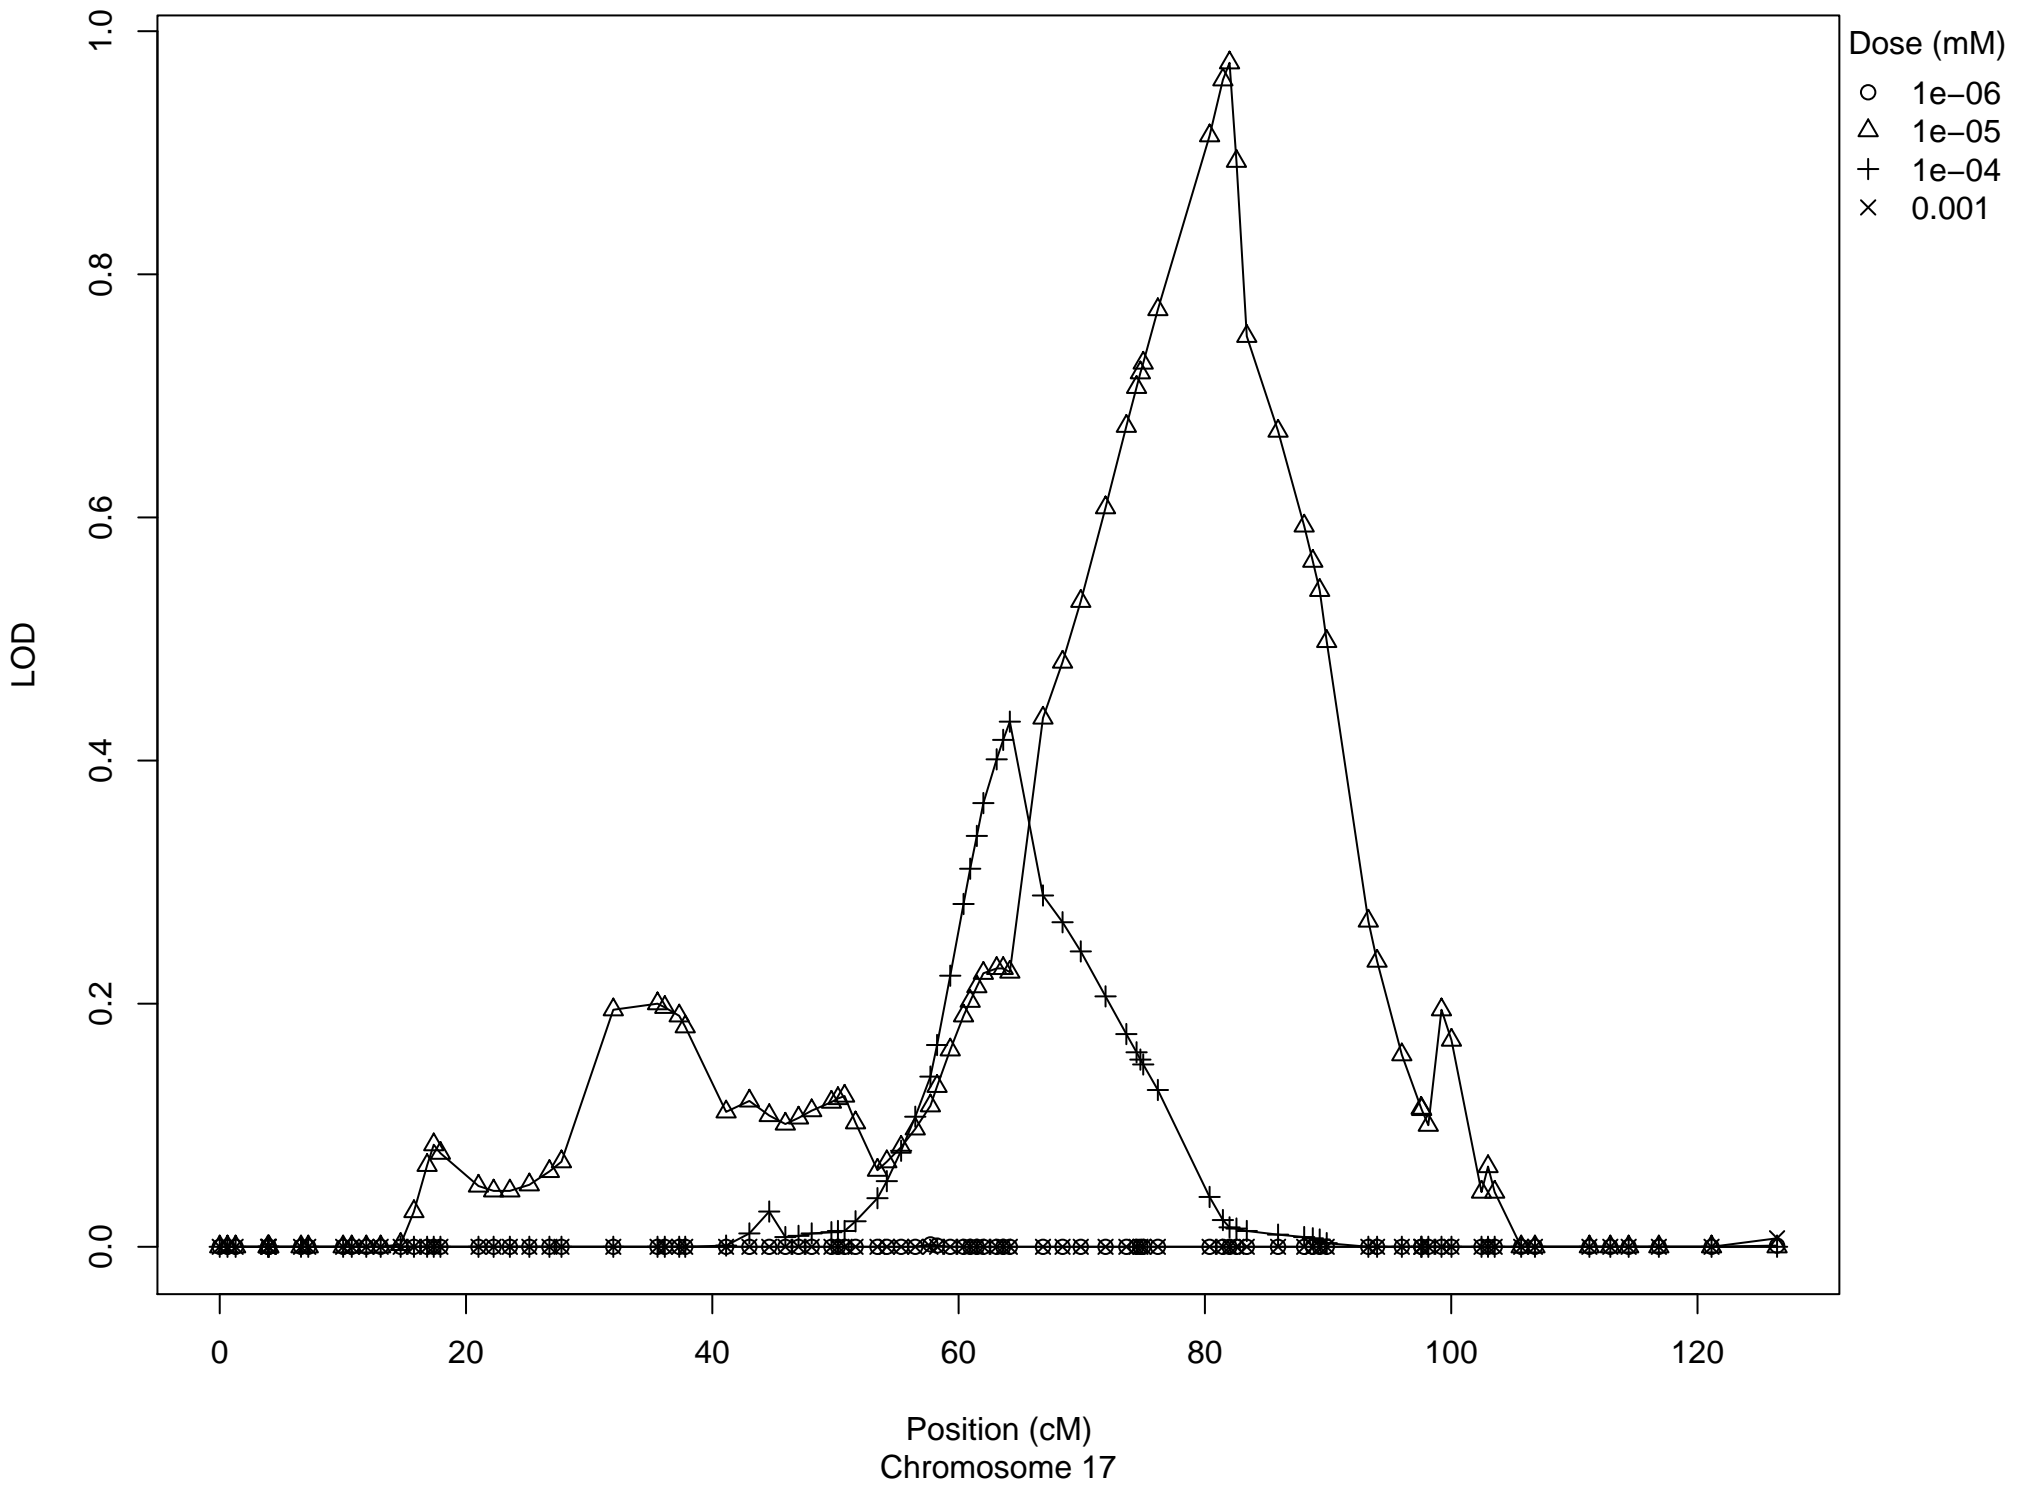

# Rapamycin (Rapa)

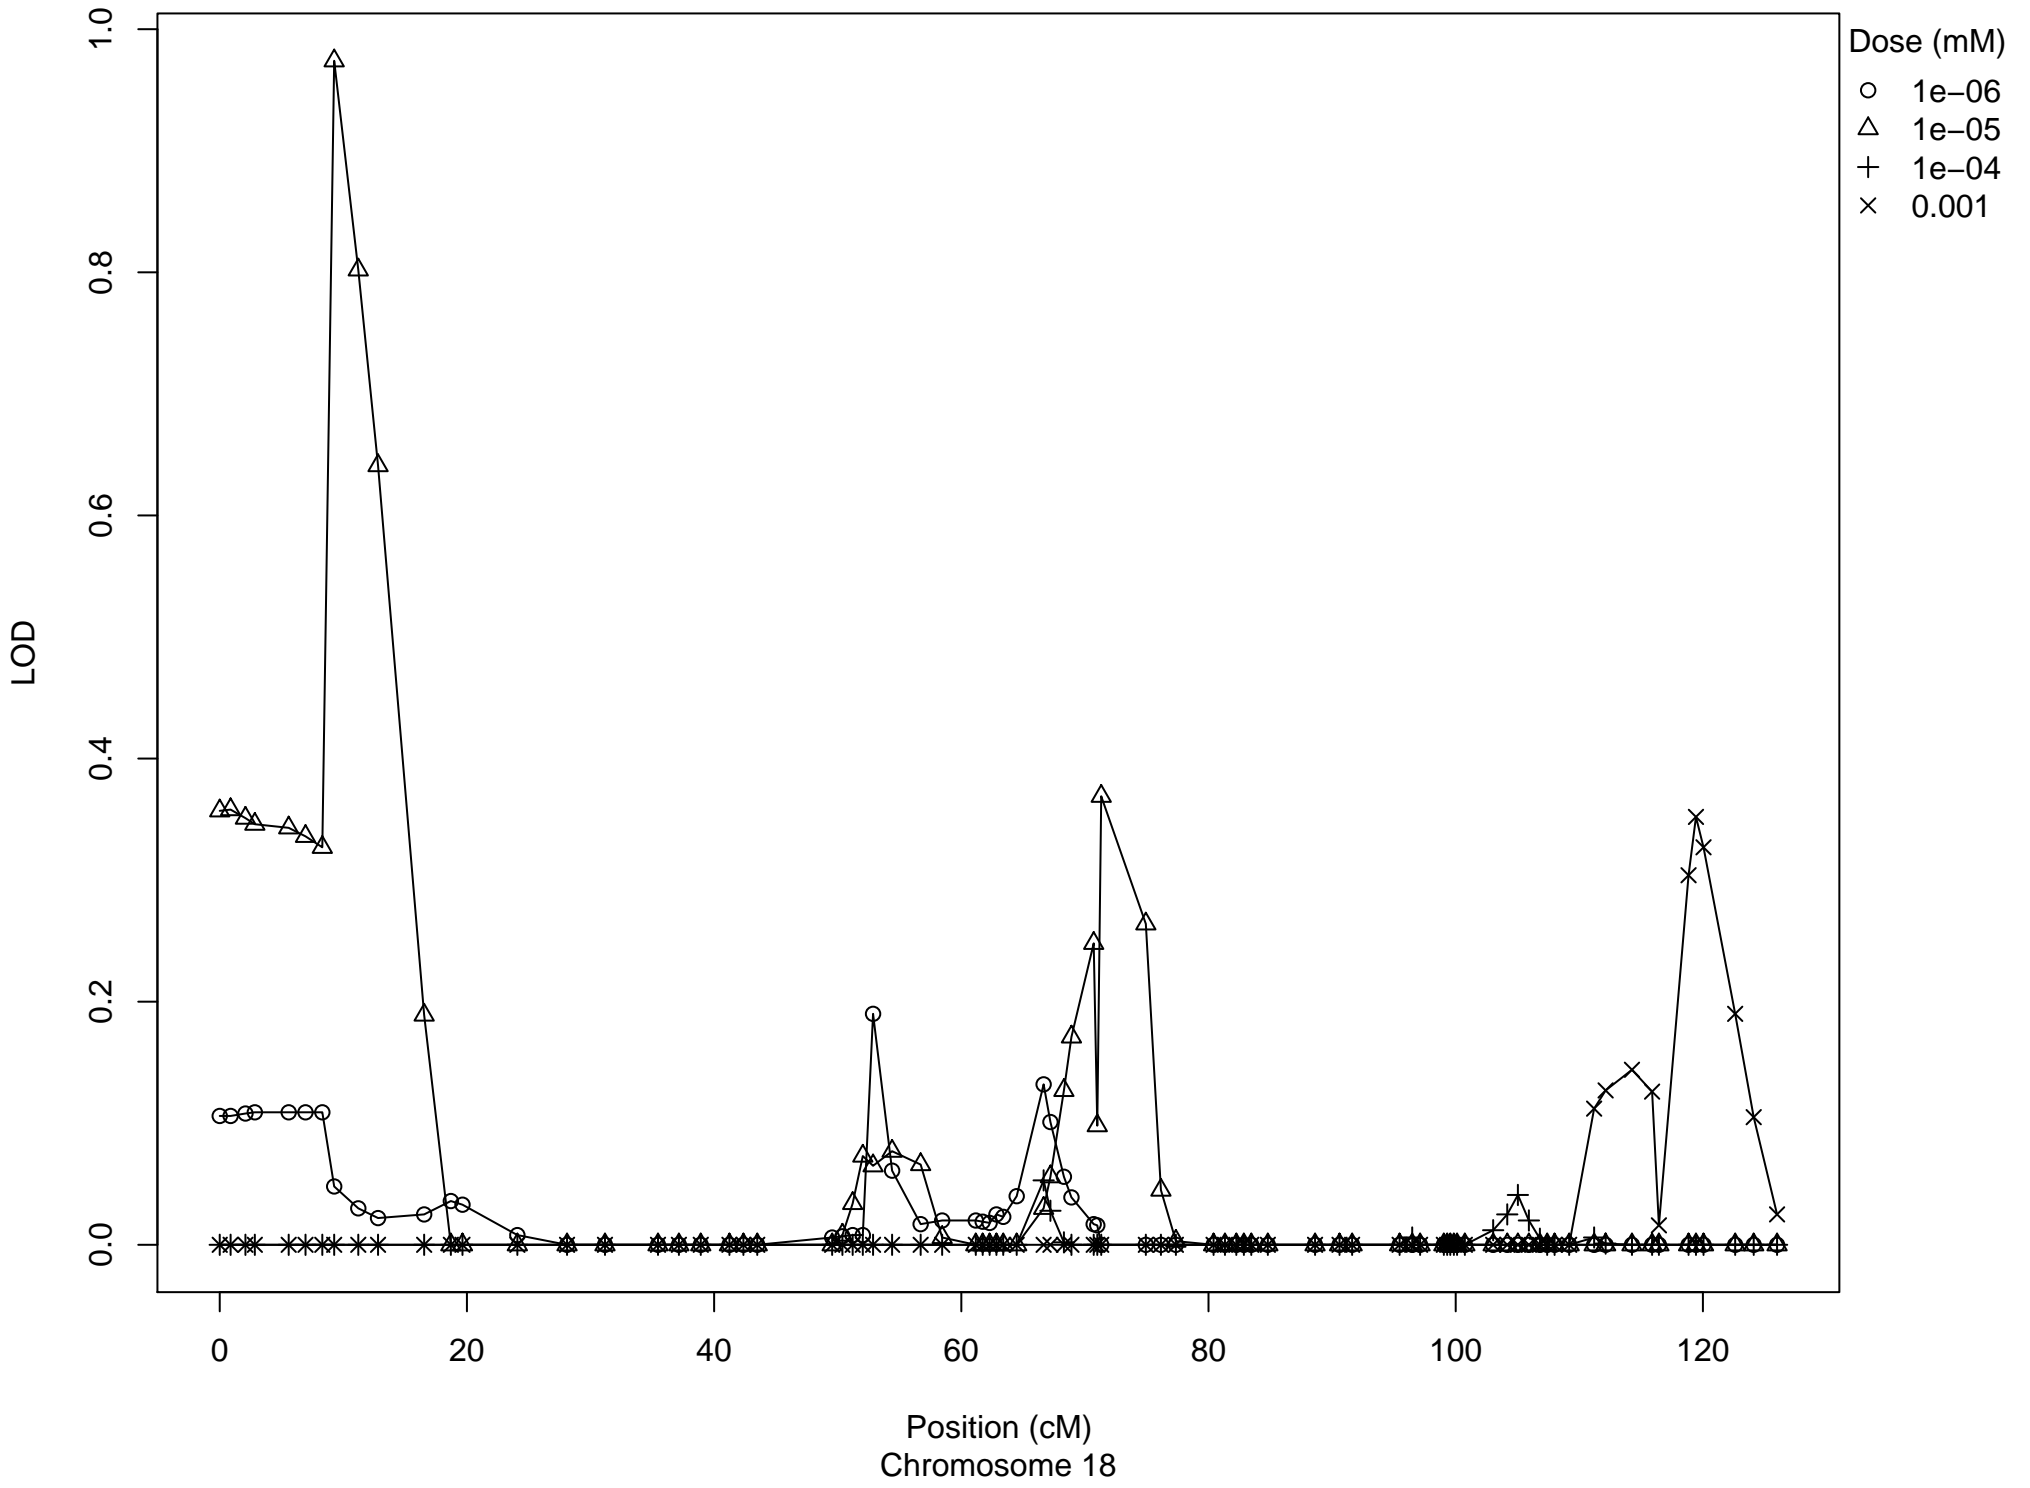

# Rapamycin (Rapa)

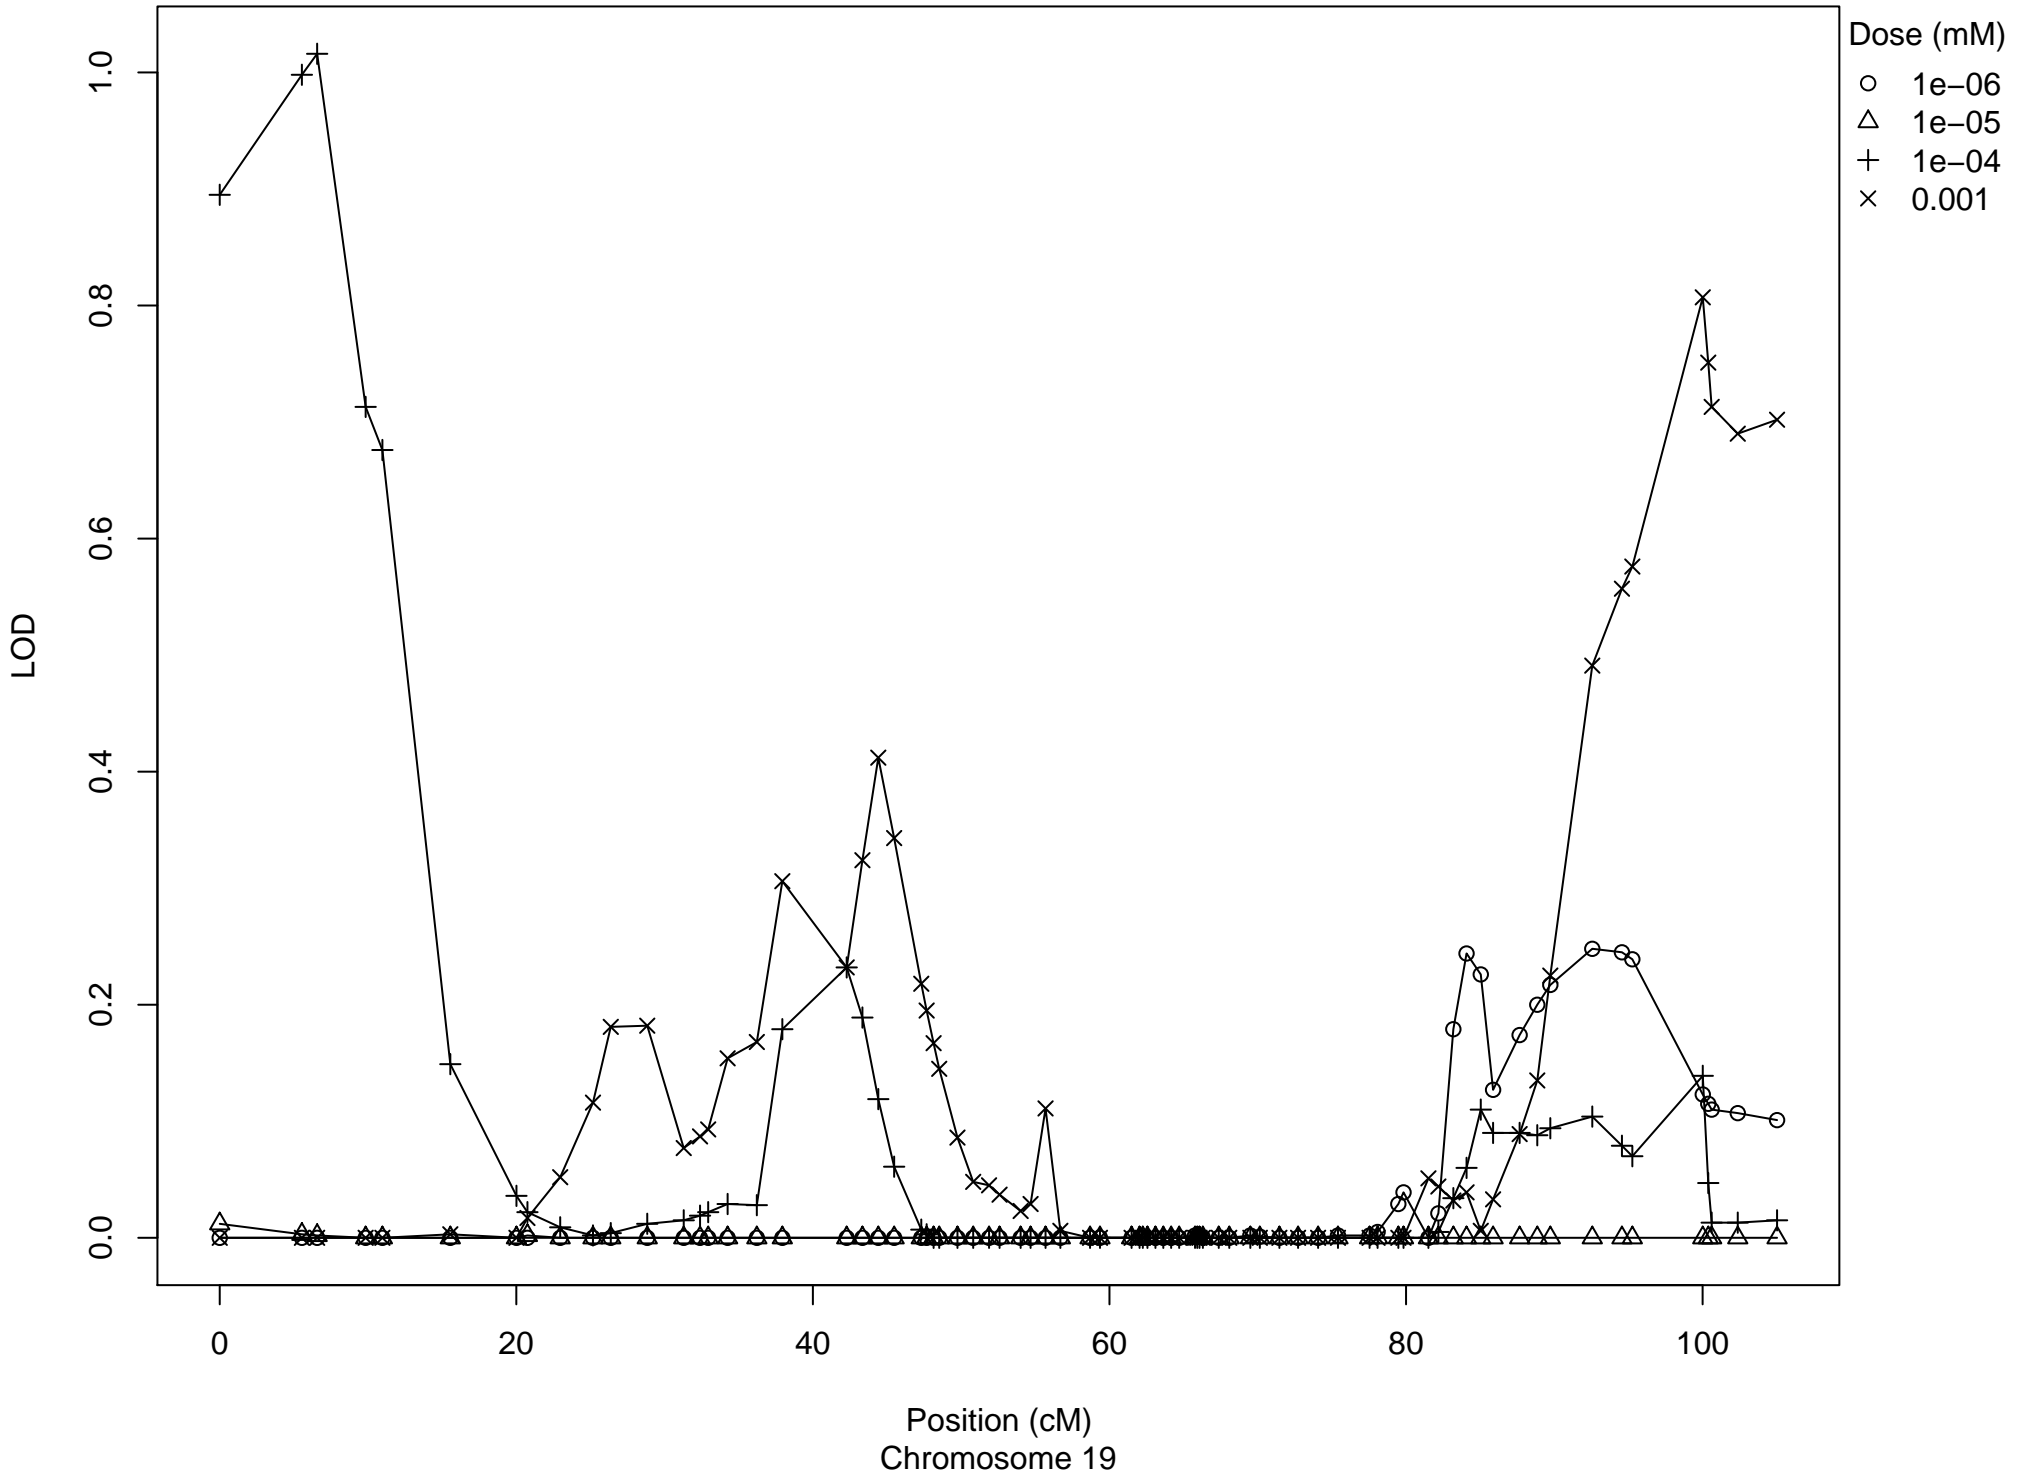

# Rapamycin (Rapa)

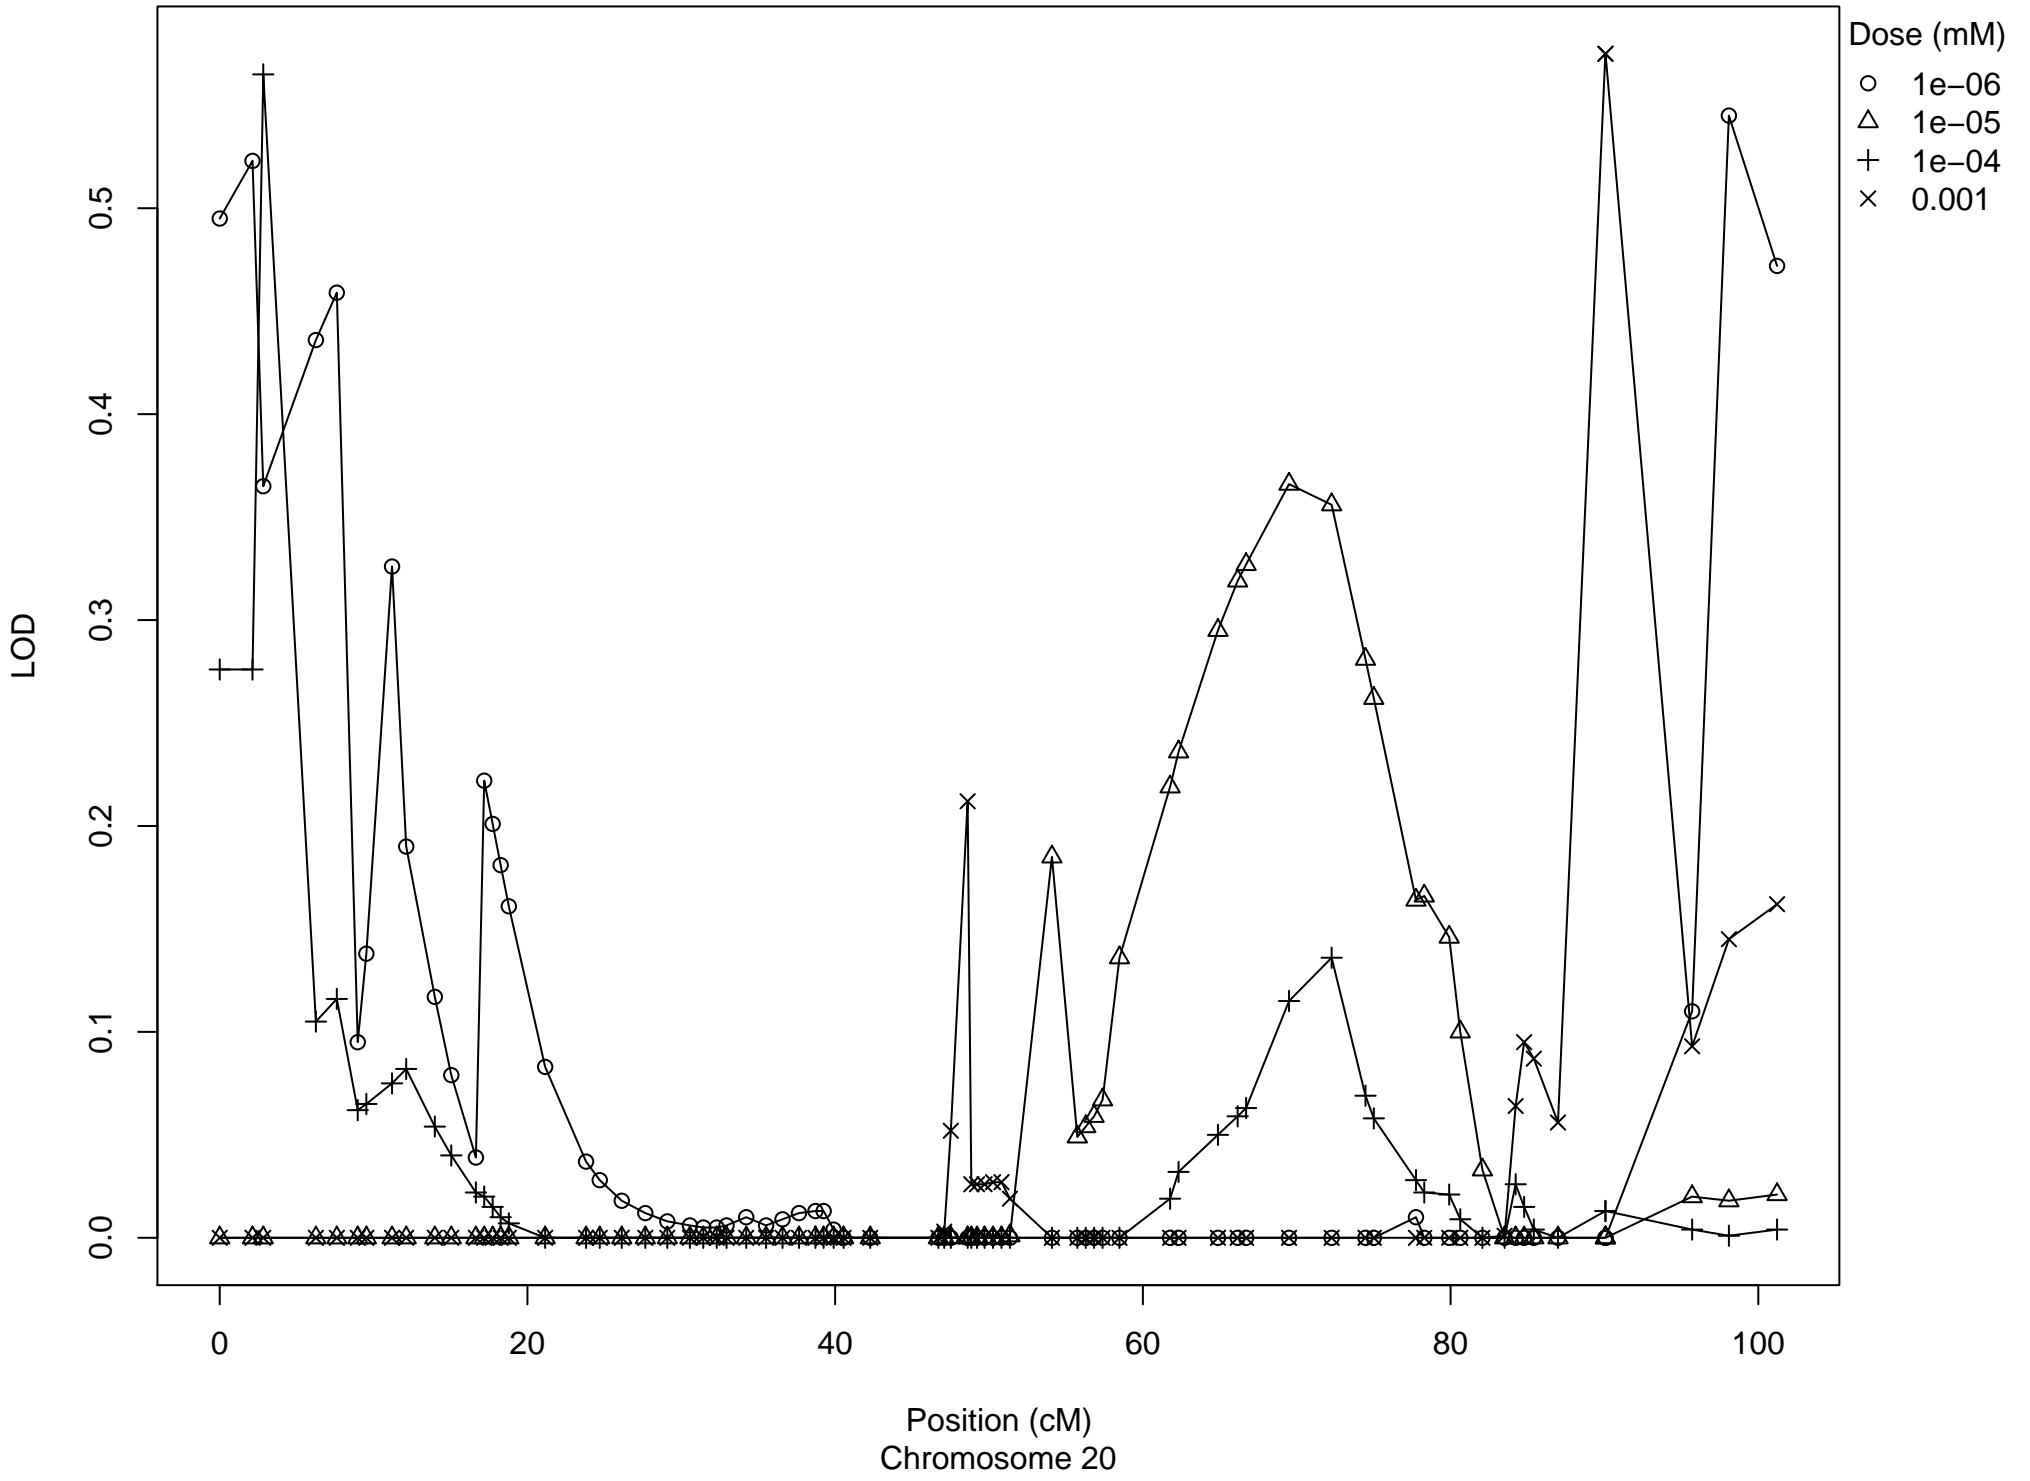



# Rapamycin (Rapa)

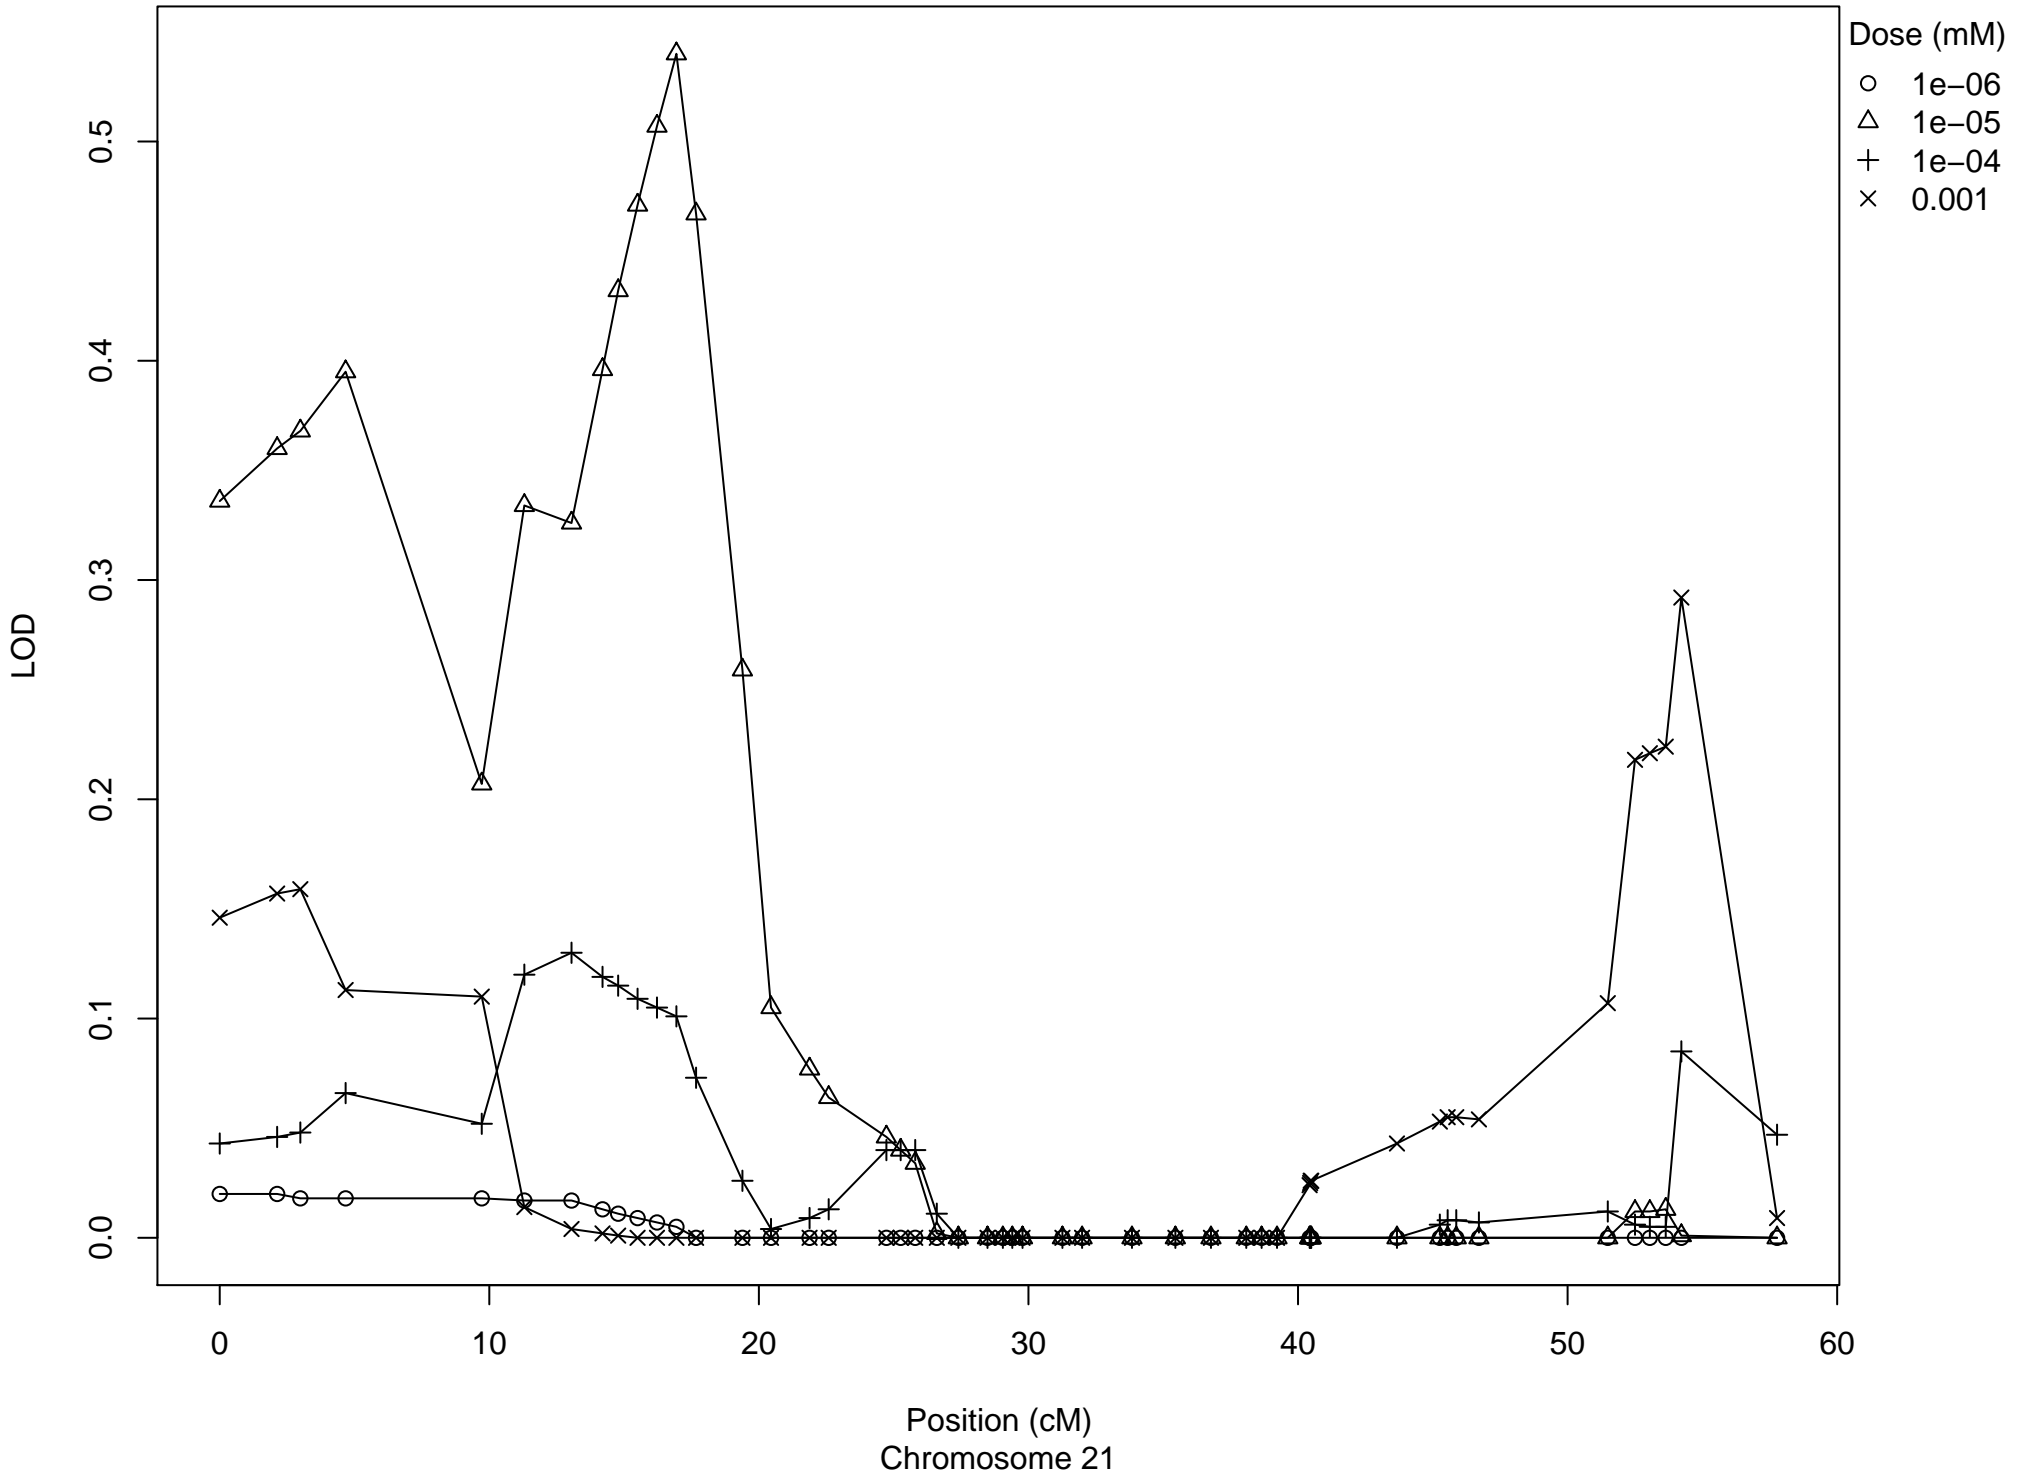

# Rapamycin (Rapa)

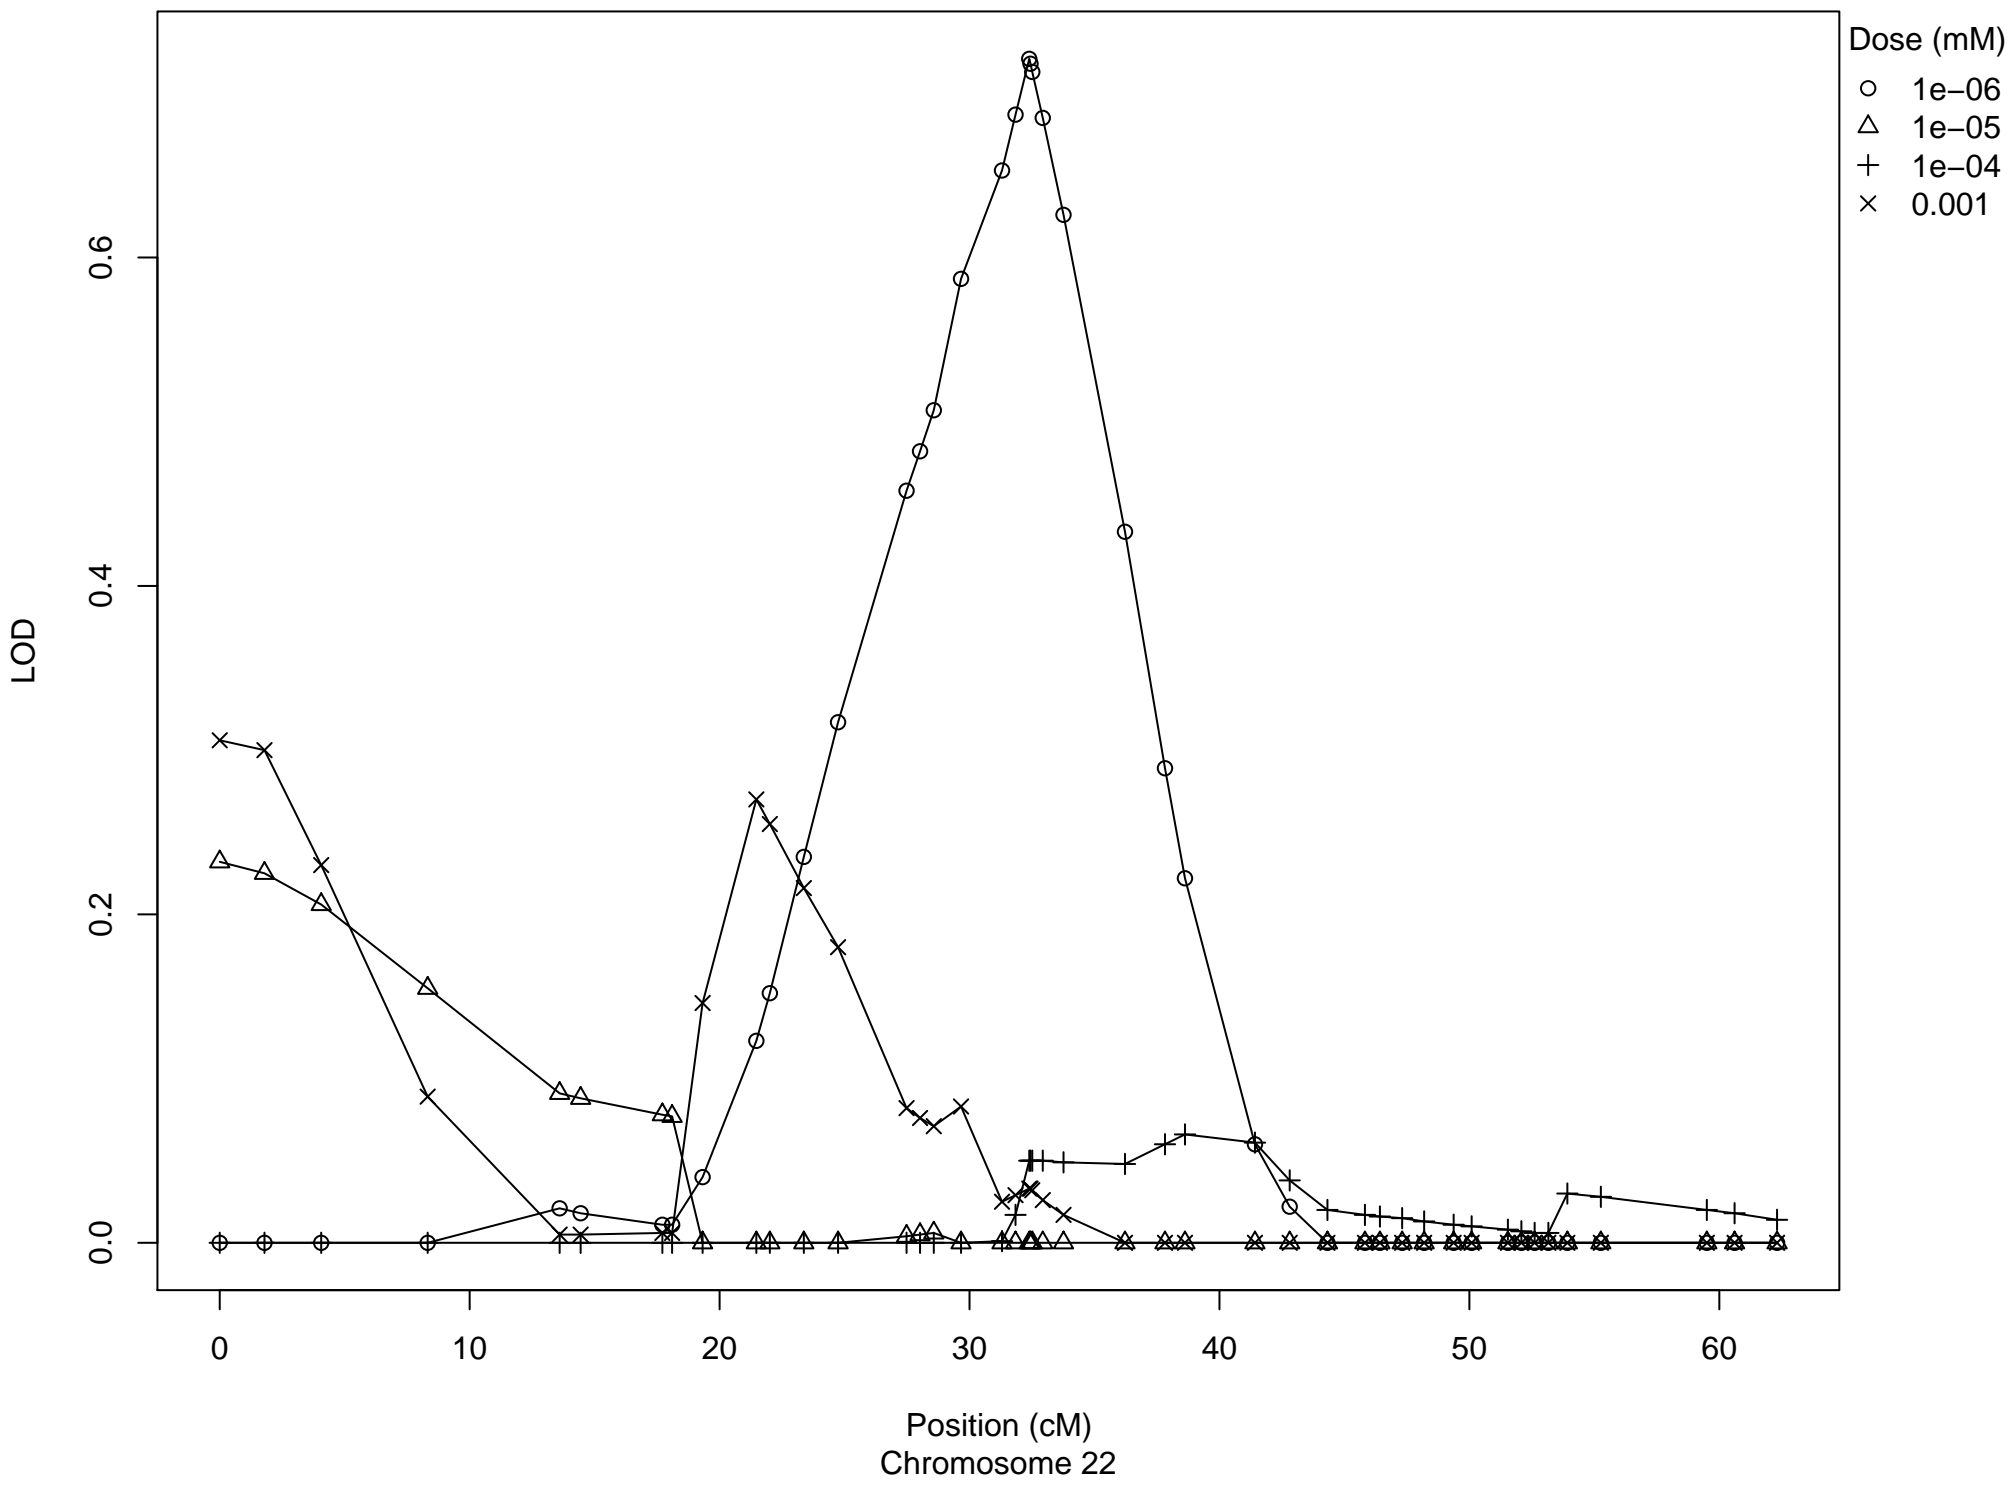

# Temozolomide (Temo)

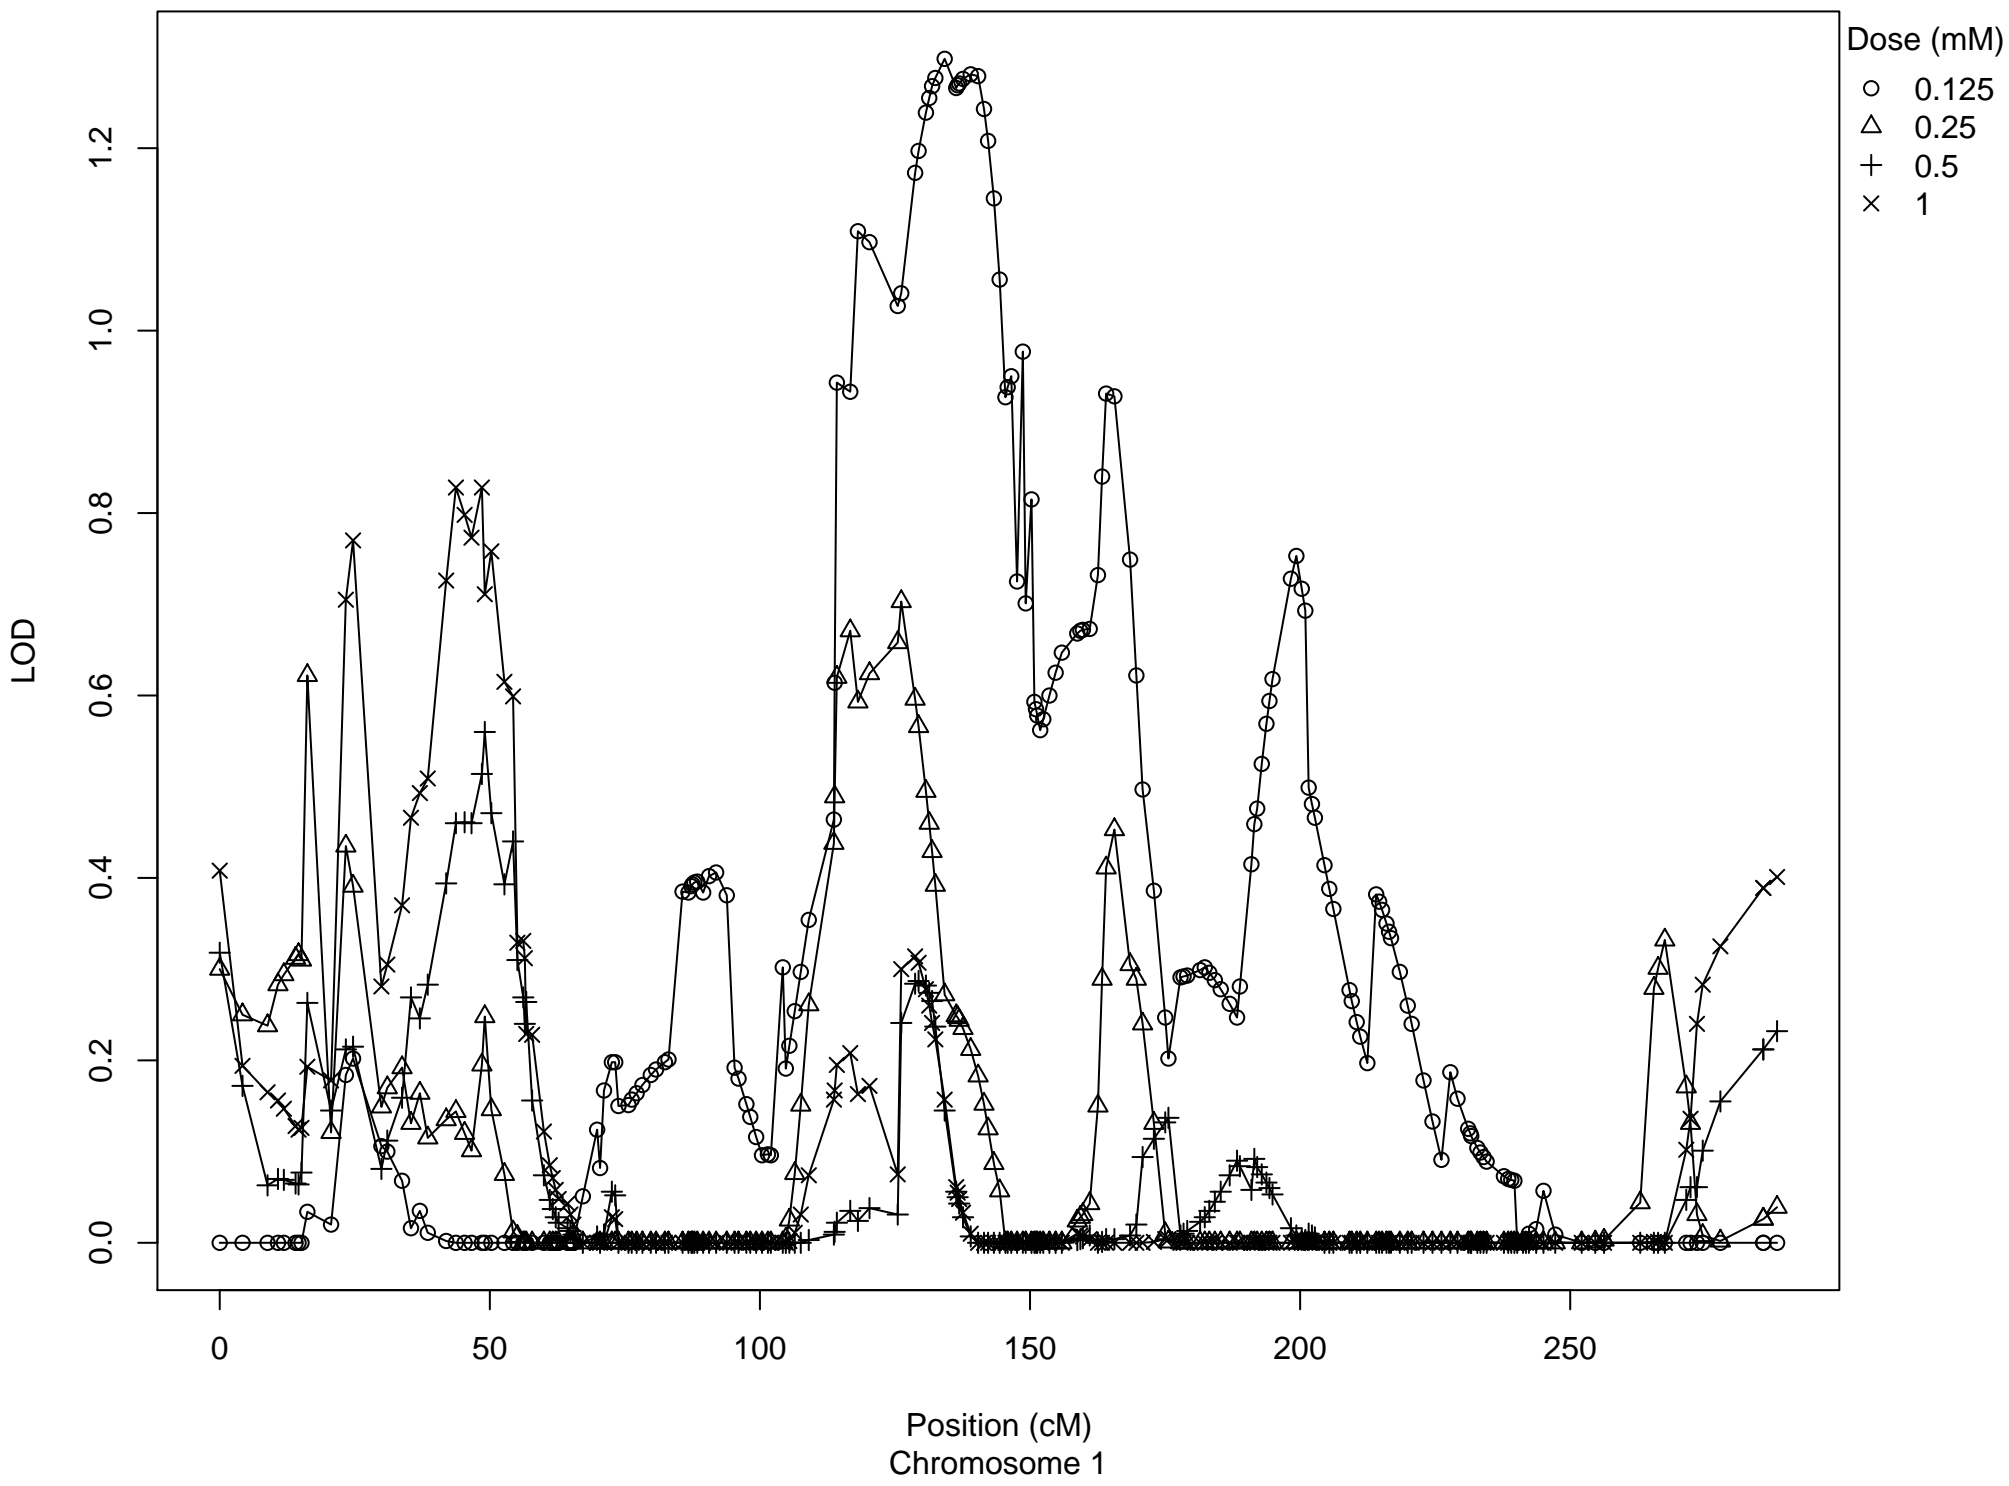

# Temozolomide (Temo)

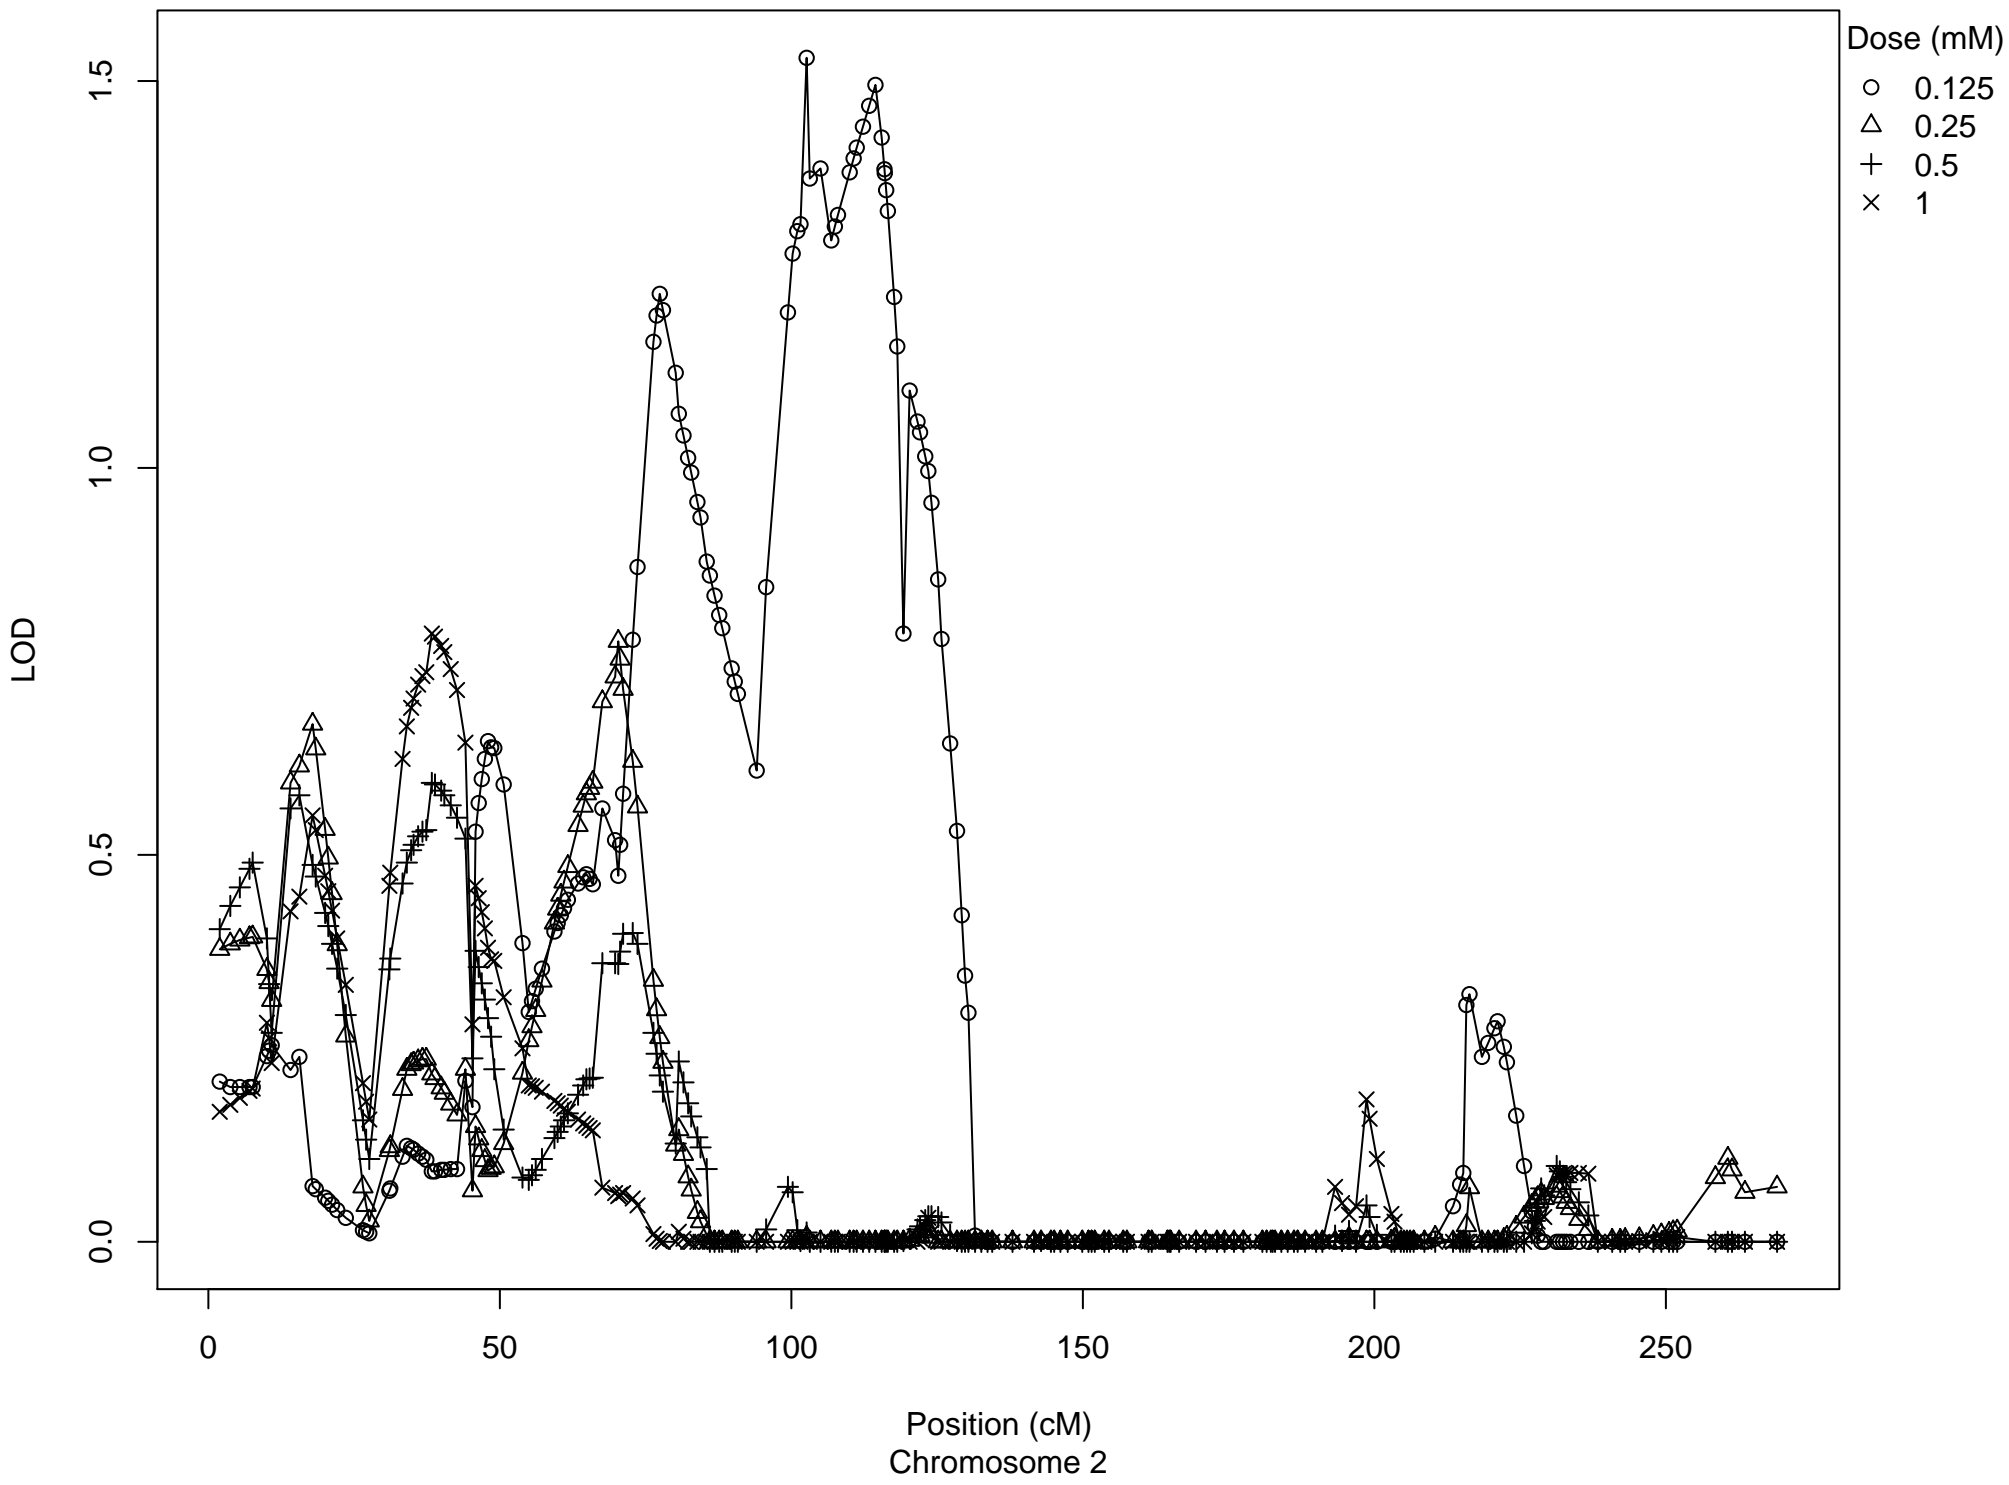

# Temozolomide (Temo)

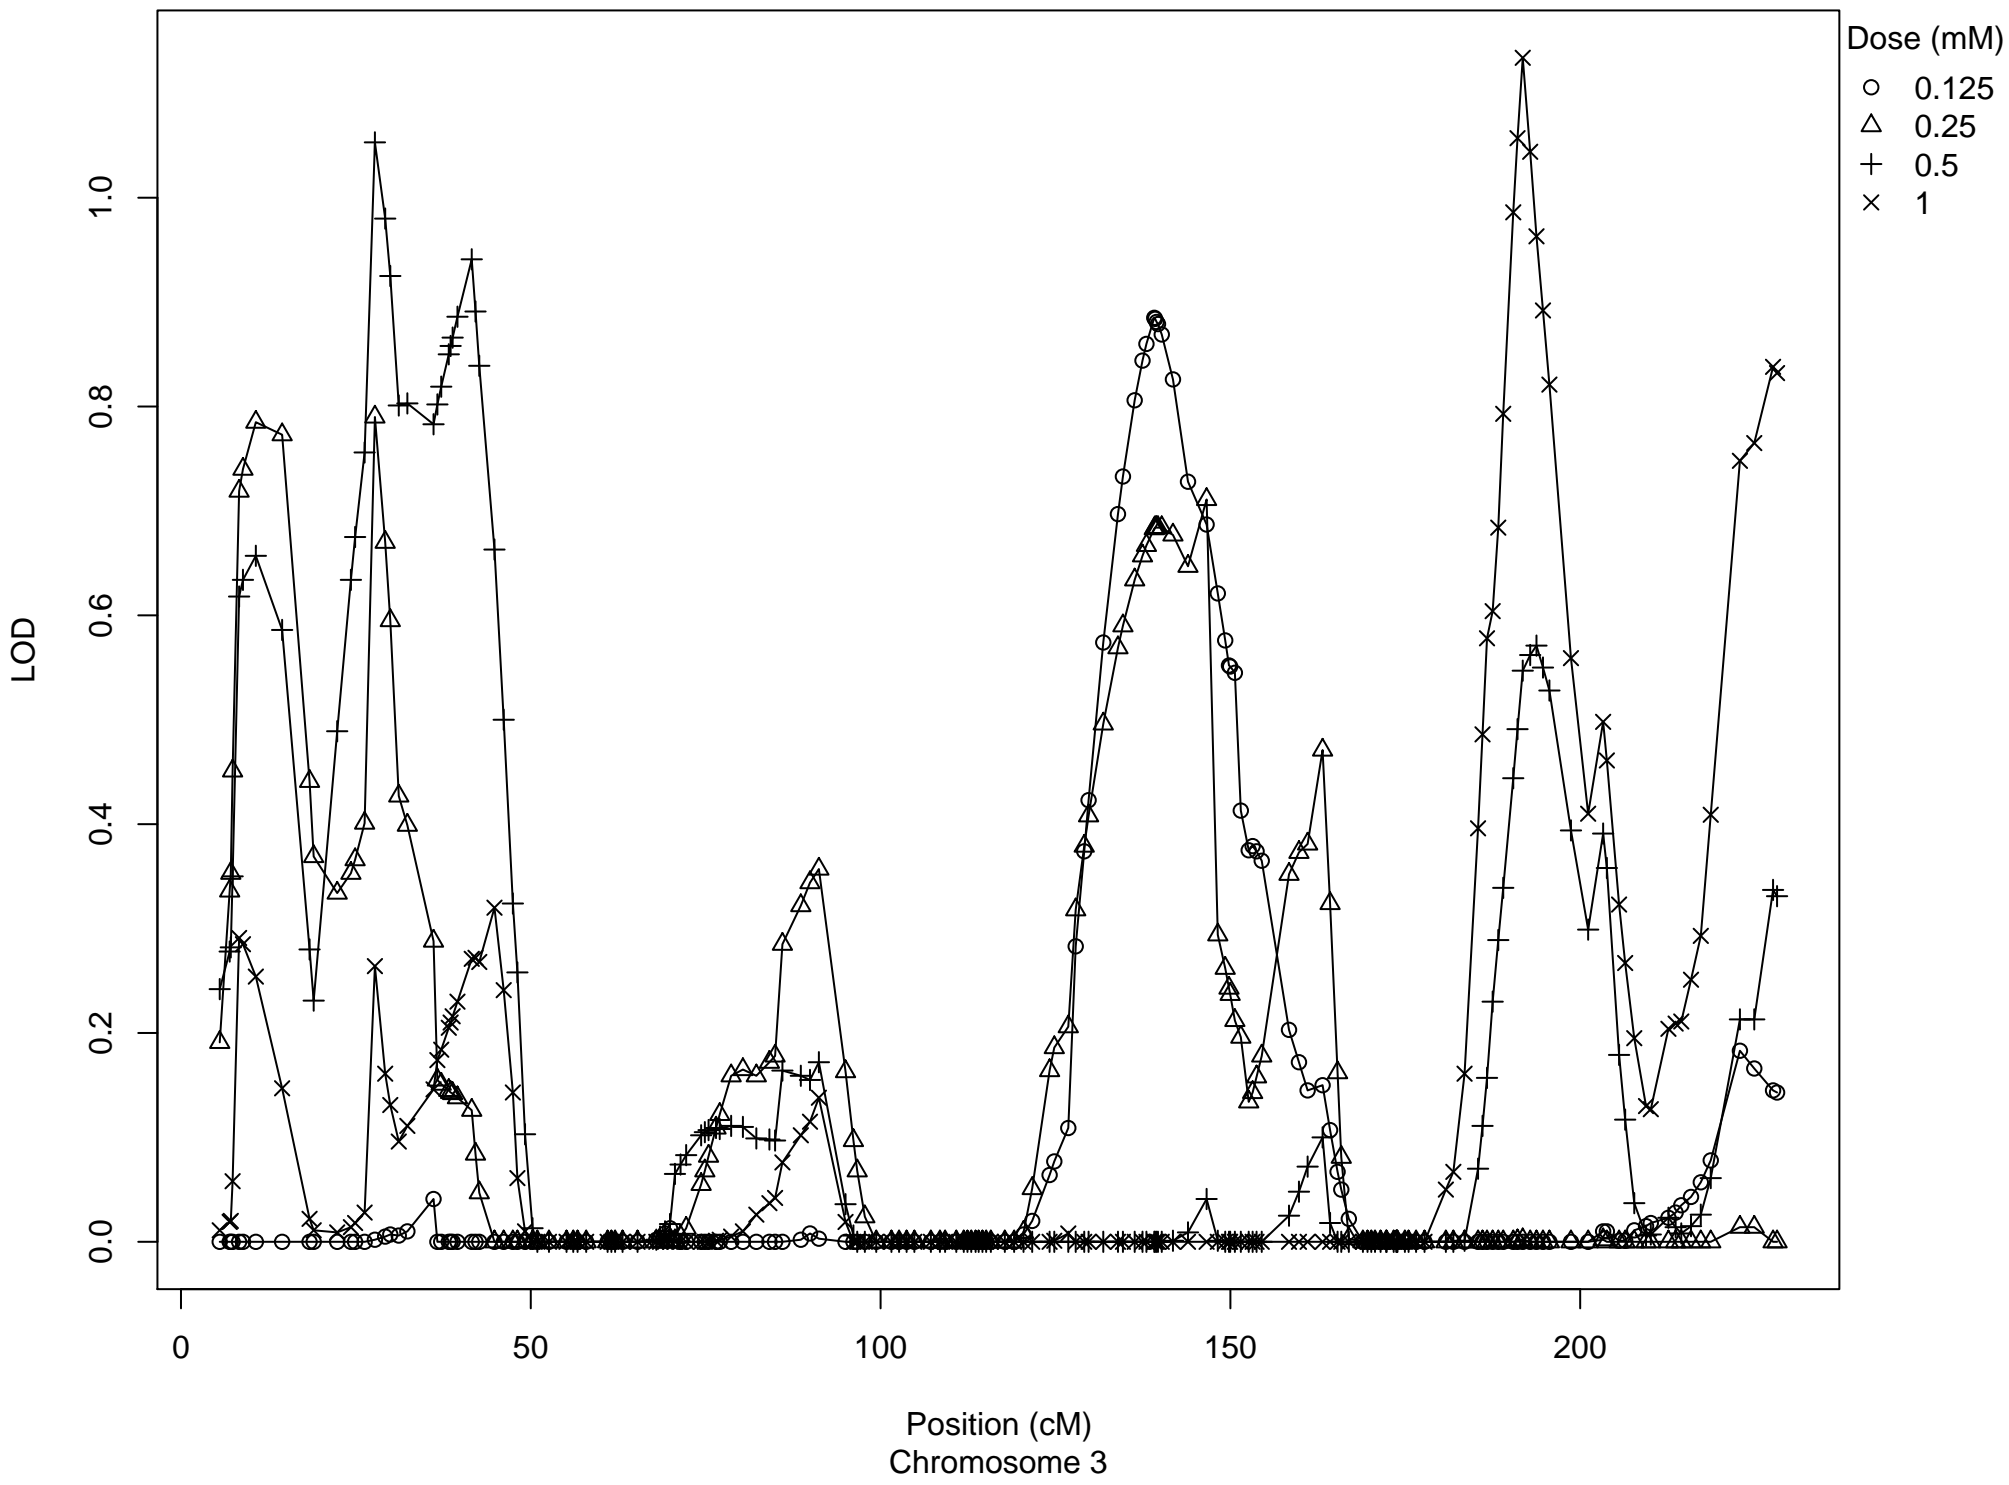

# Temozolomide (Temo)

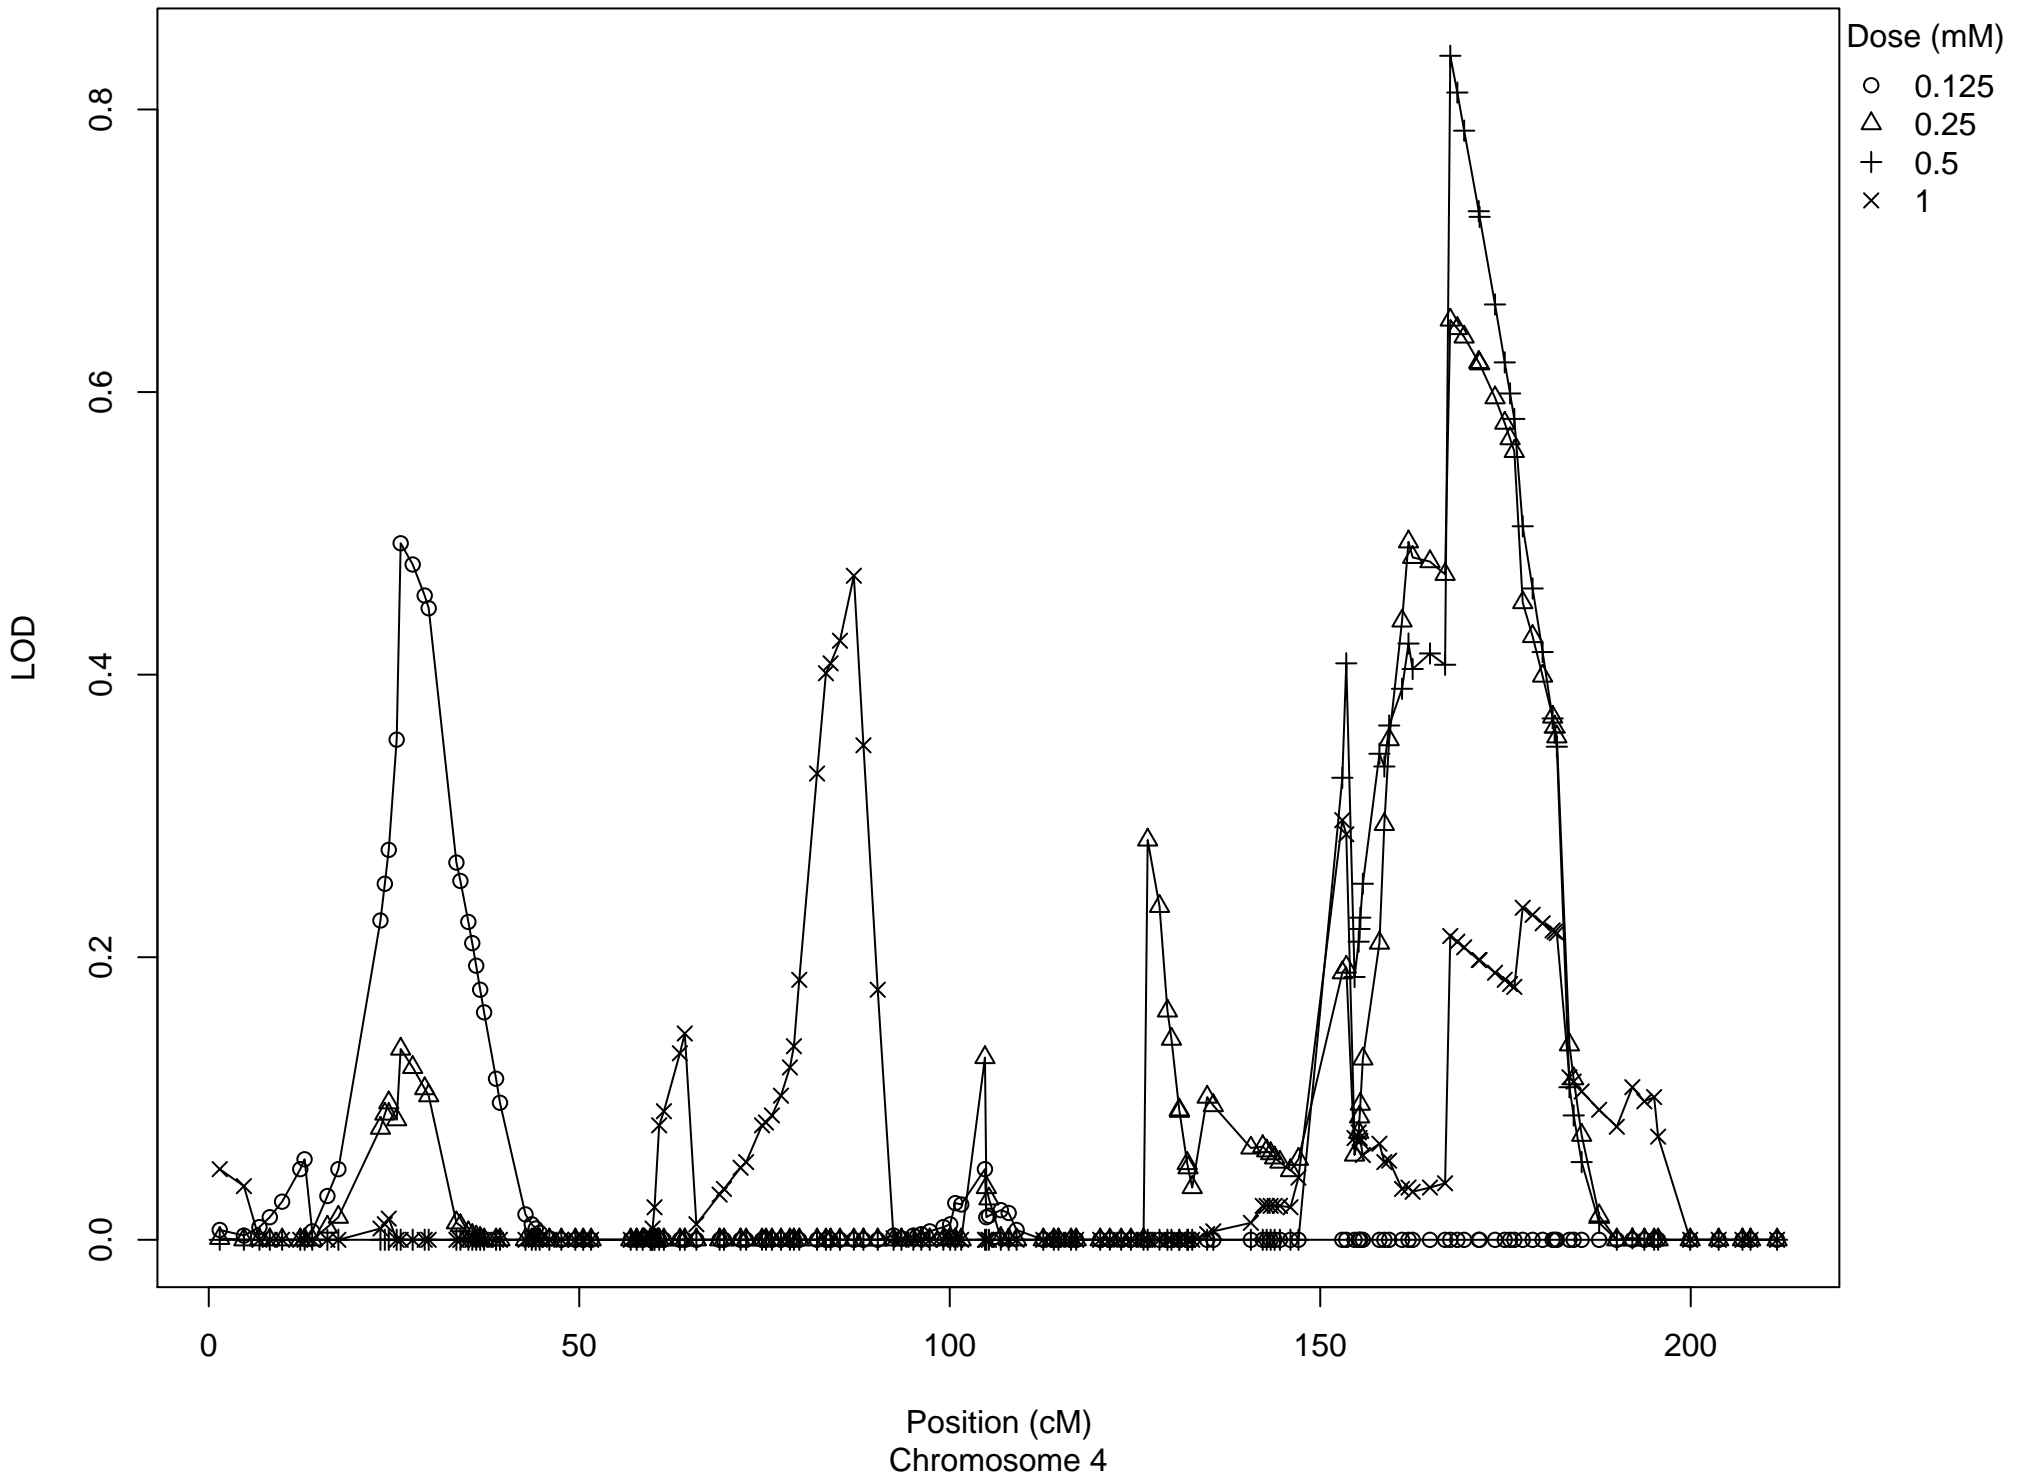

# Temozolomide (Temo)

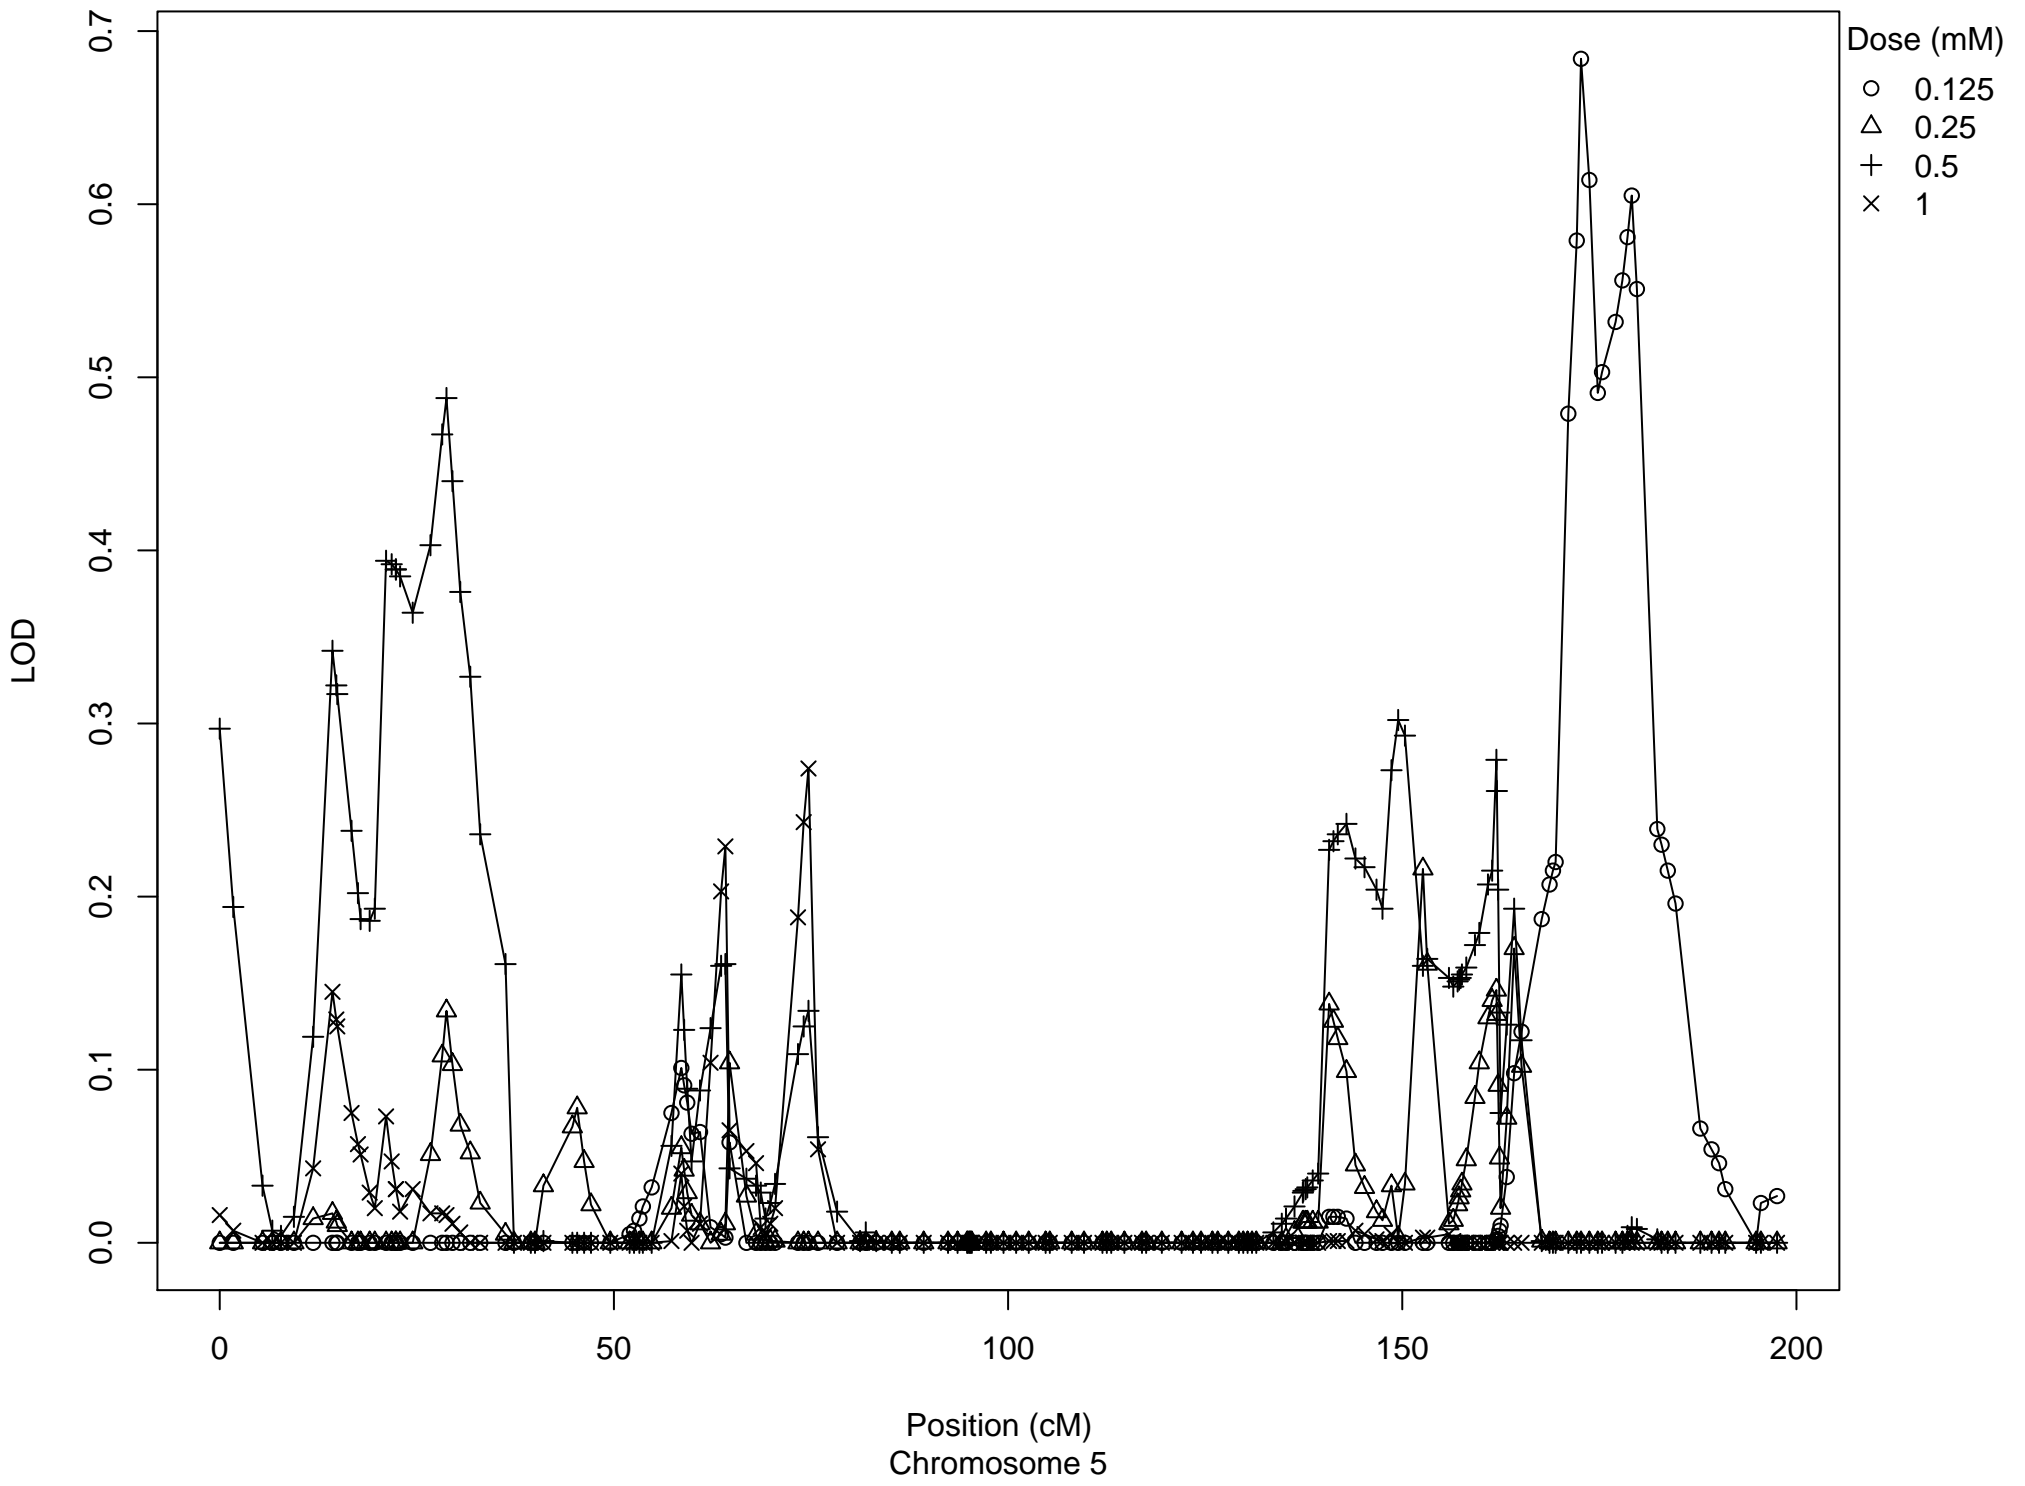

# Temozolomide (Temo)

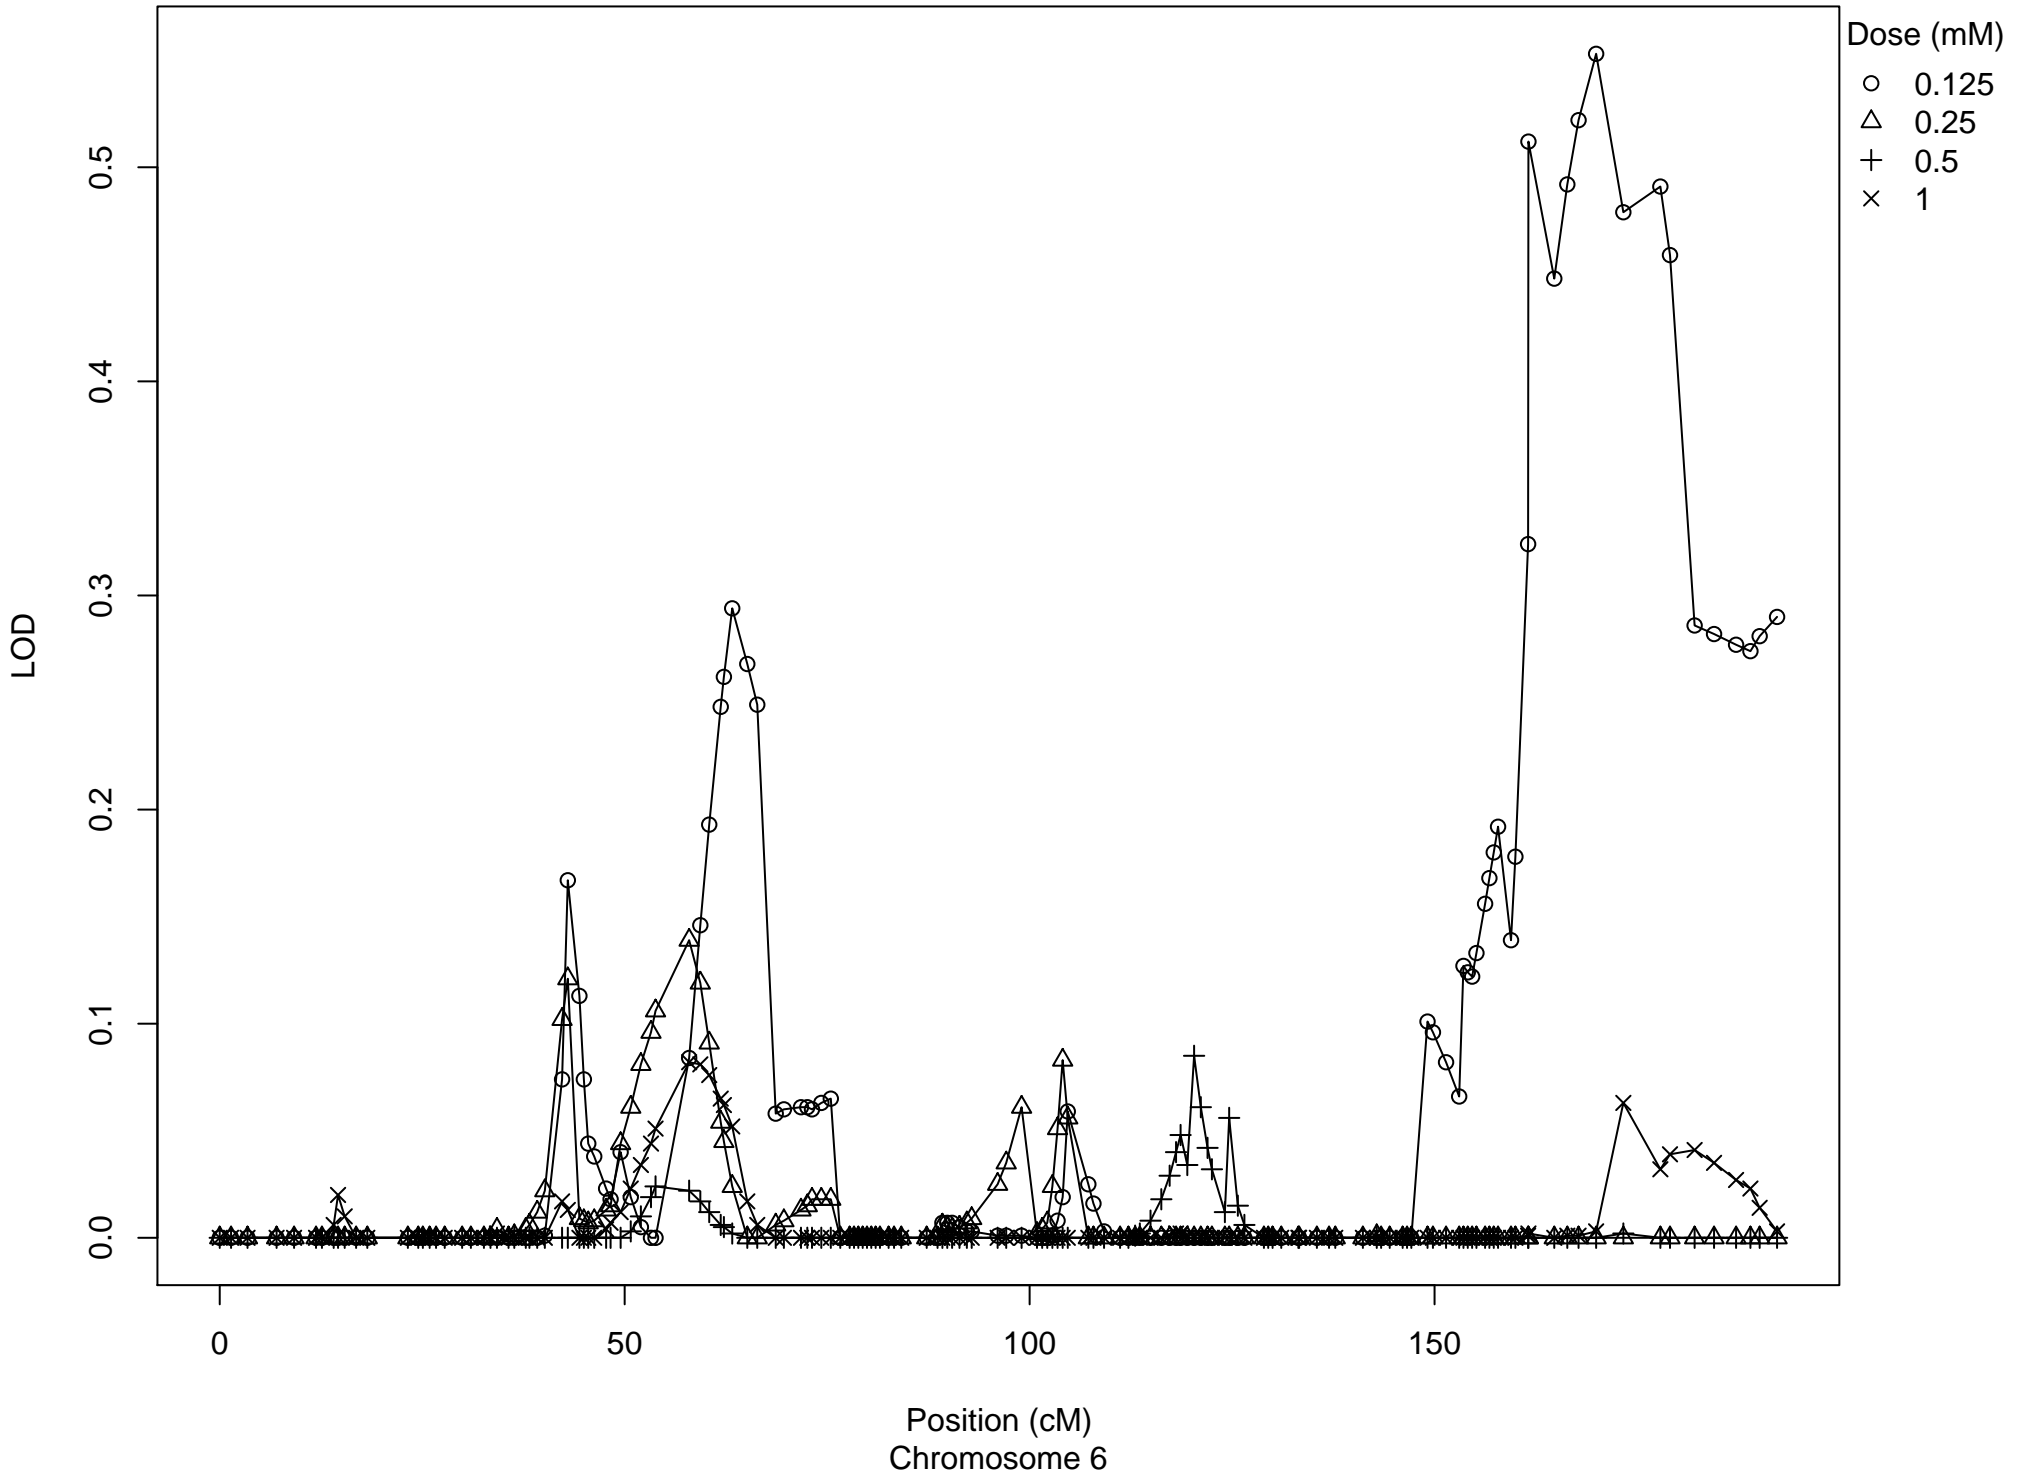



# Temozolomide (Temo)

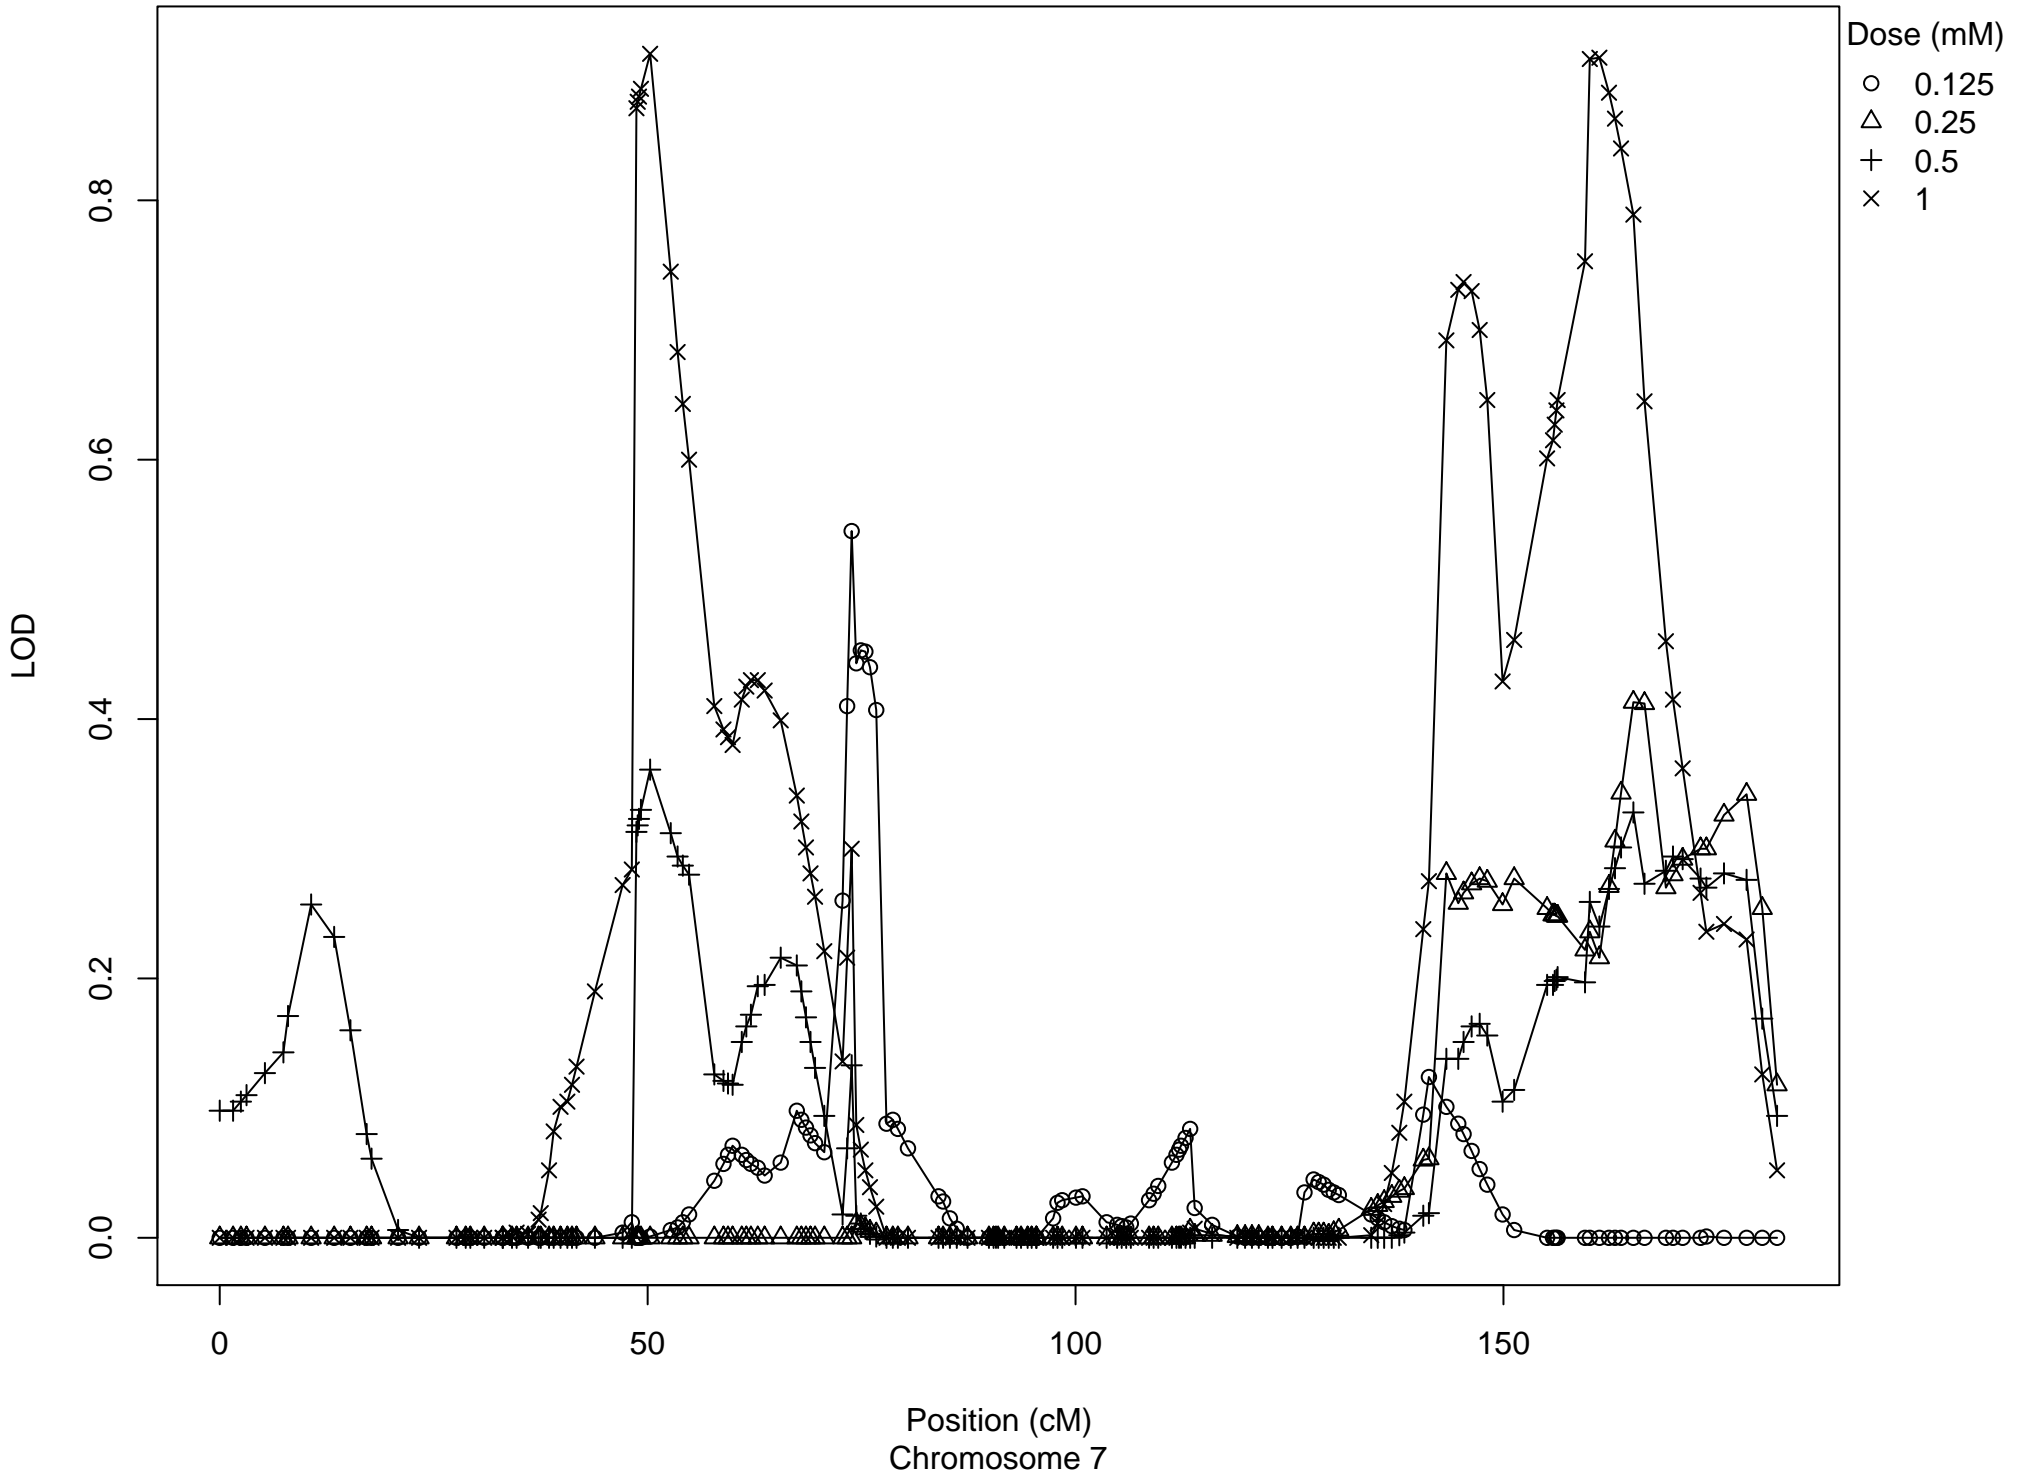

# Temozolomide (Temo)

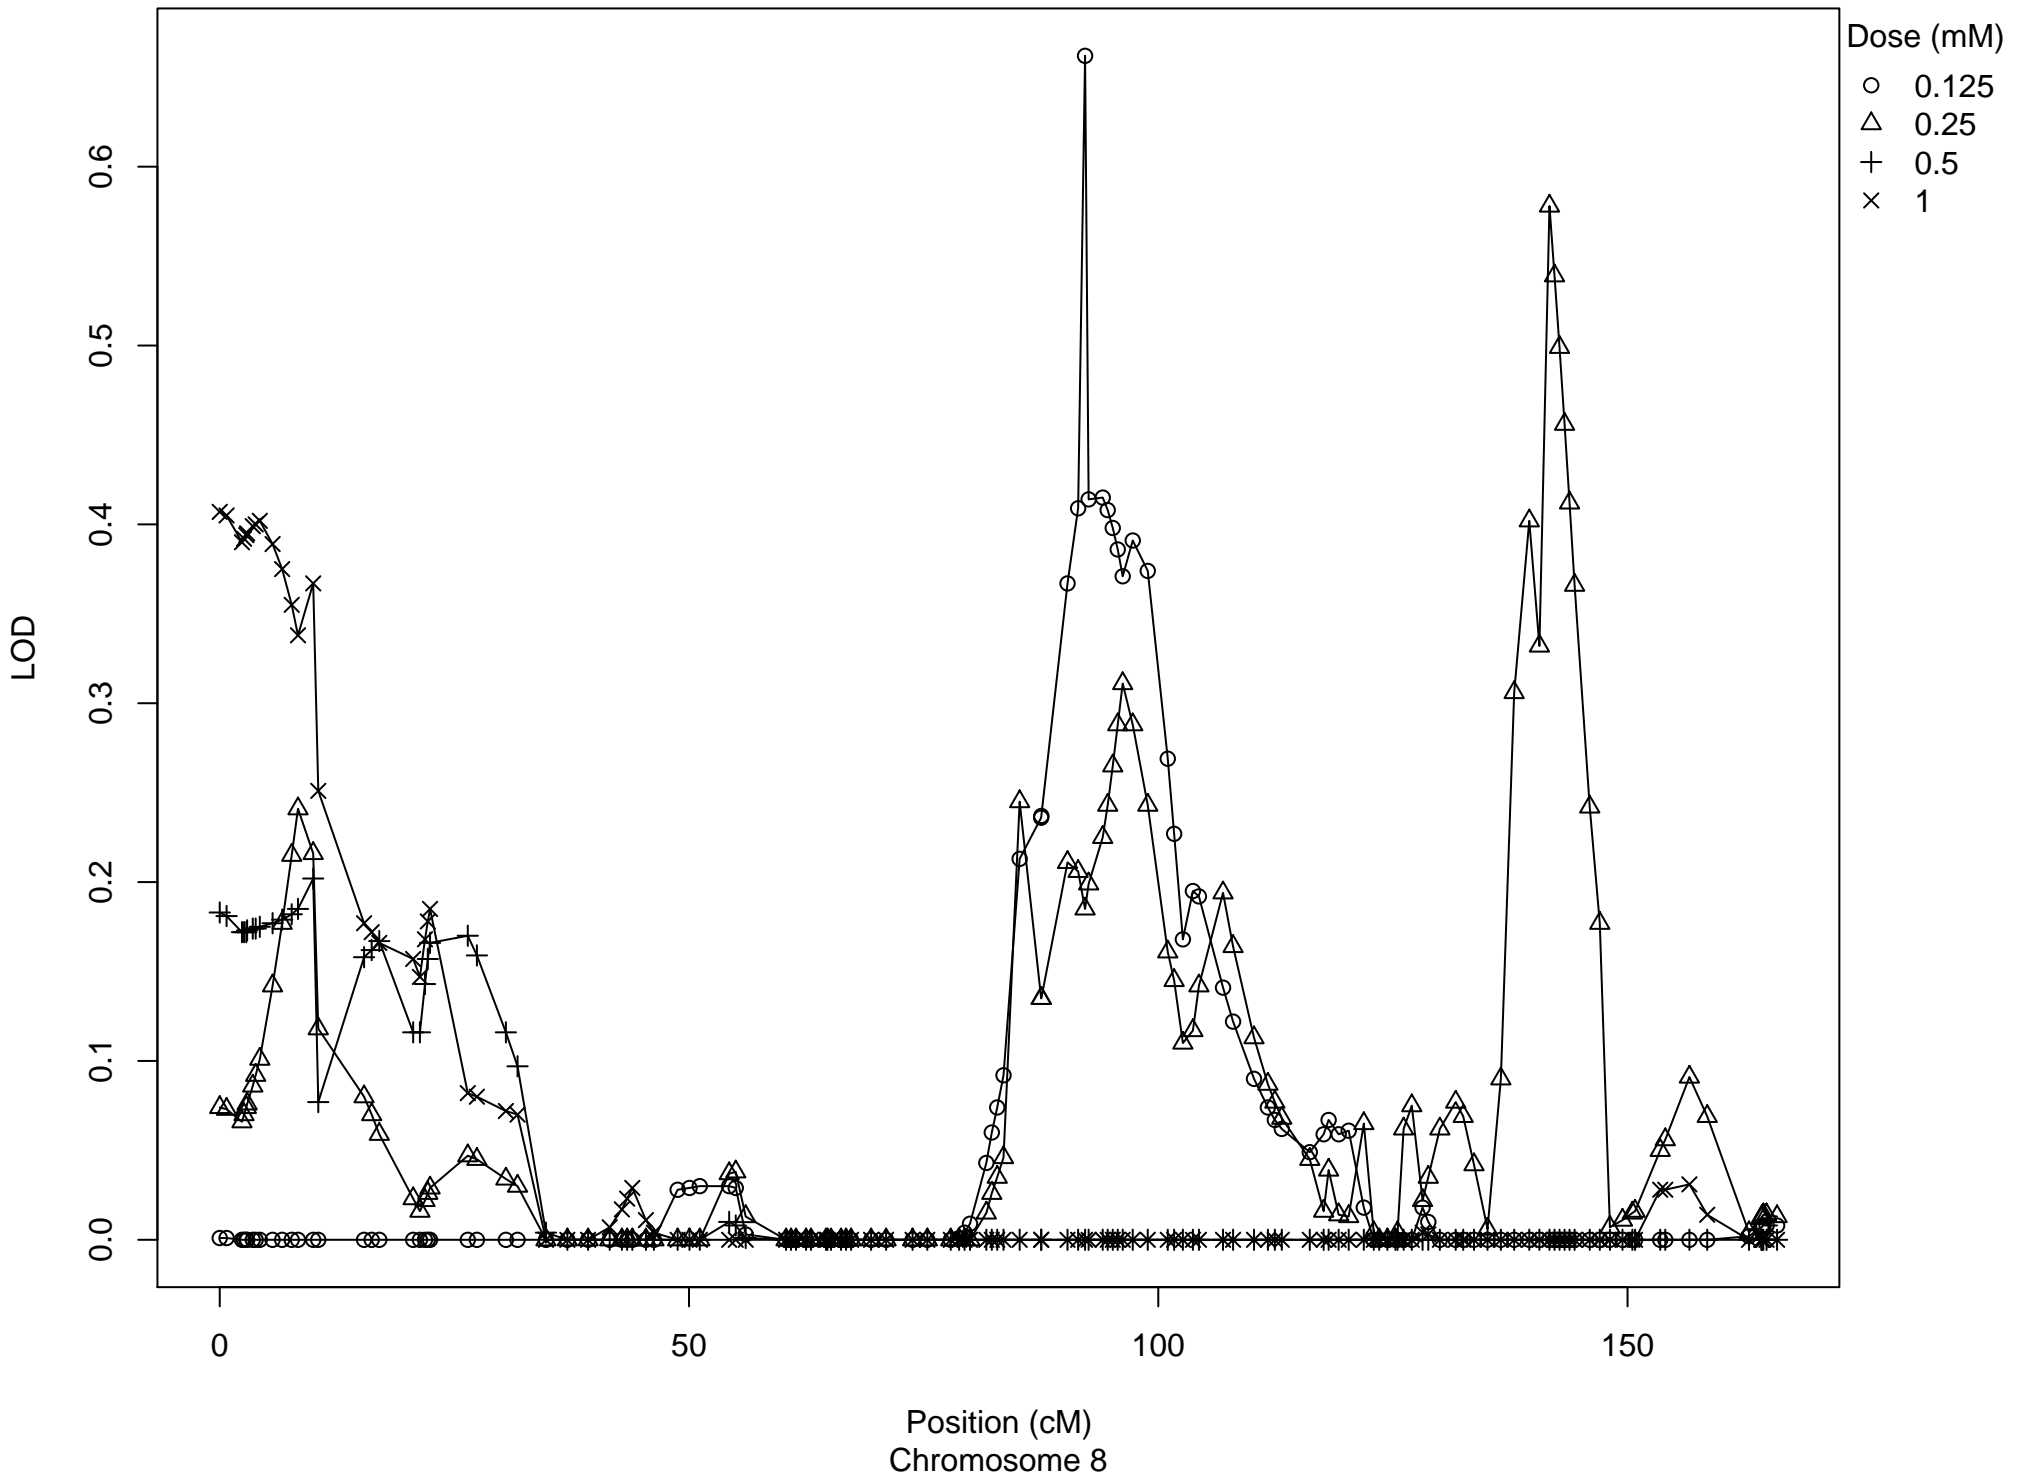

# Temozolomide (Temo)

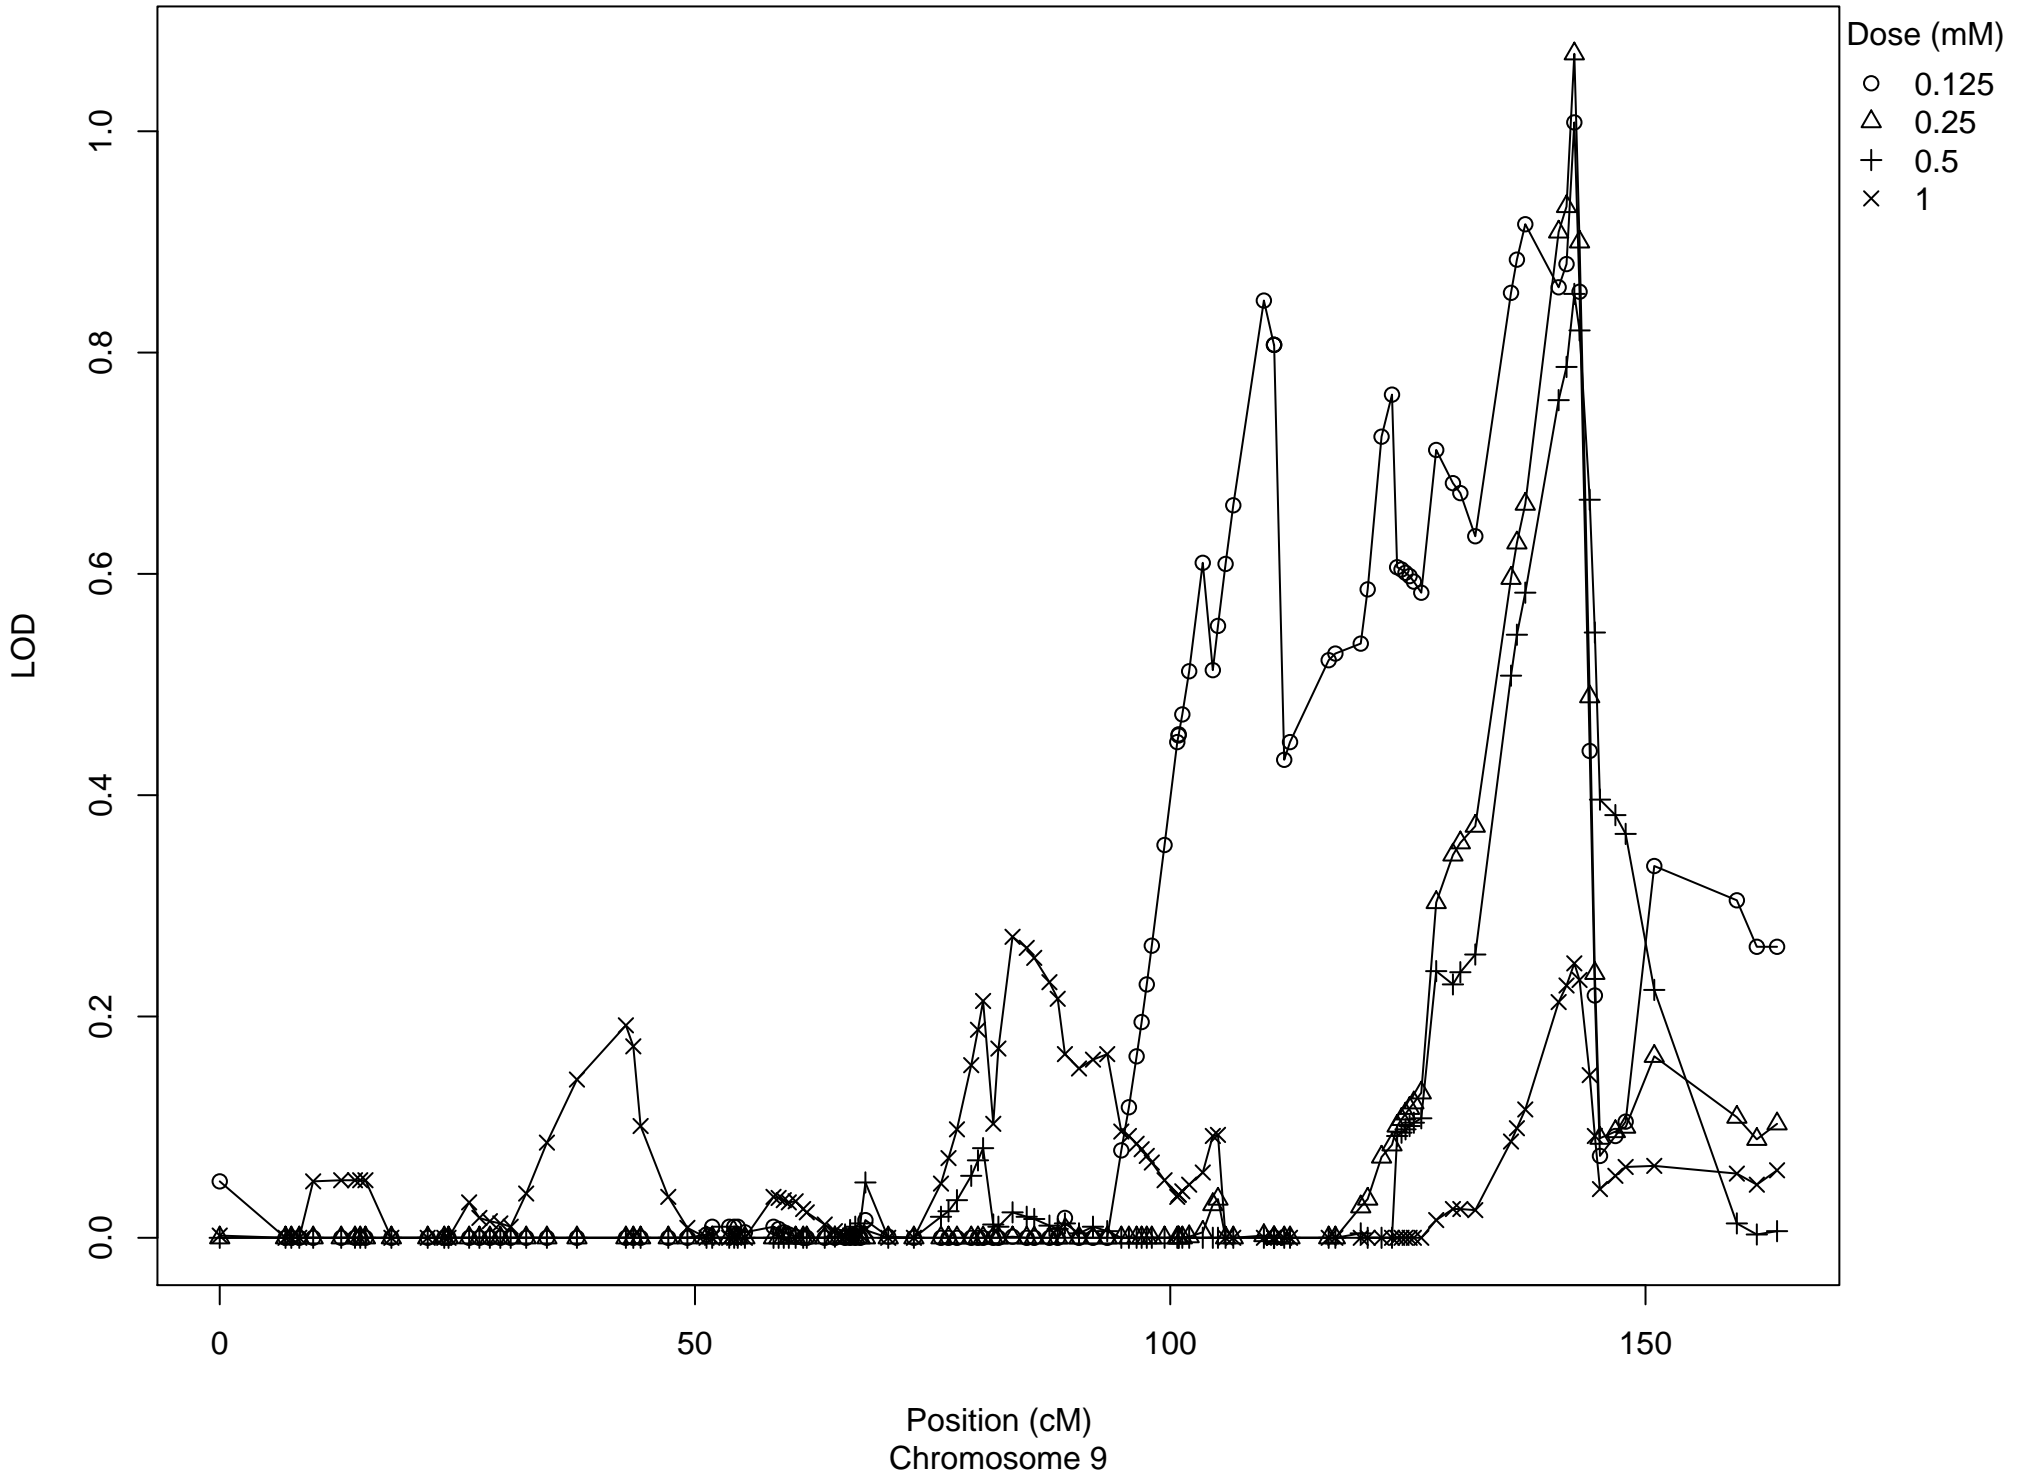

# Temozolomide (Temo)

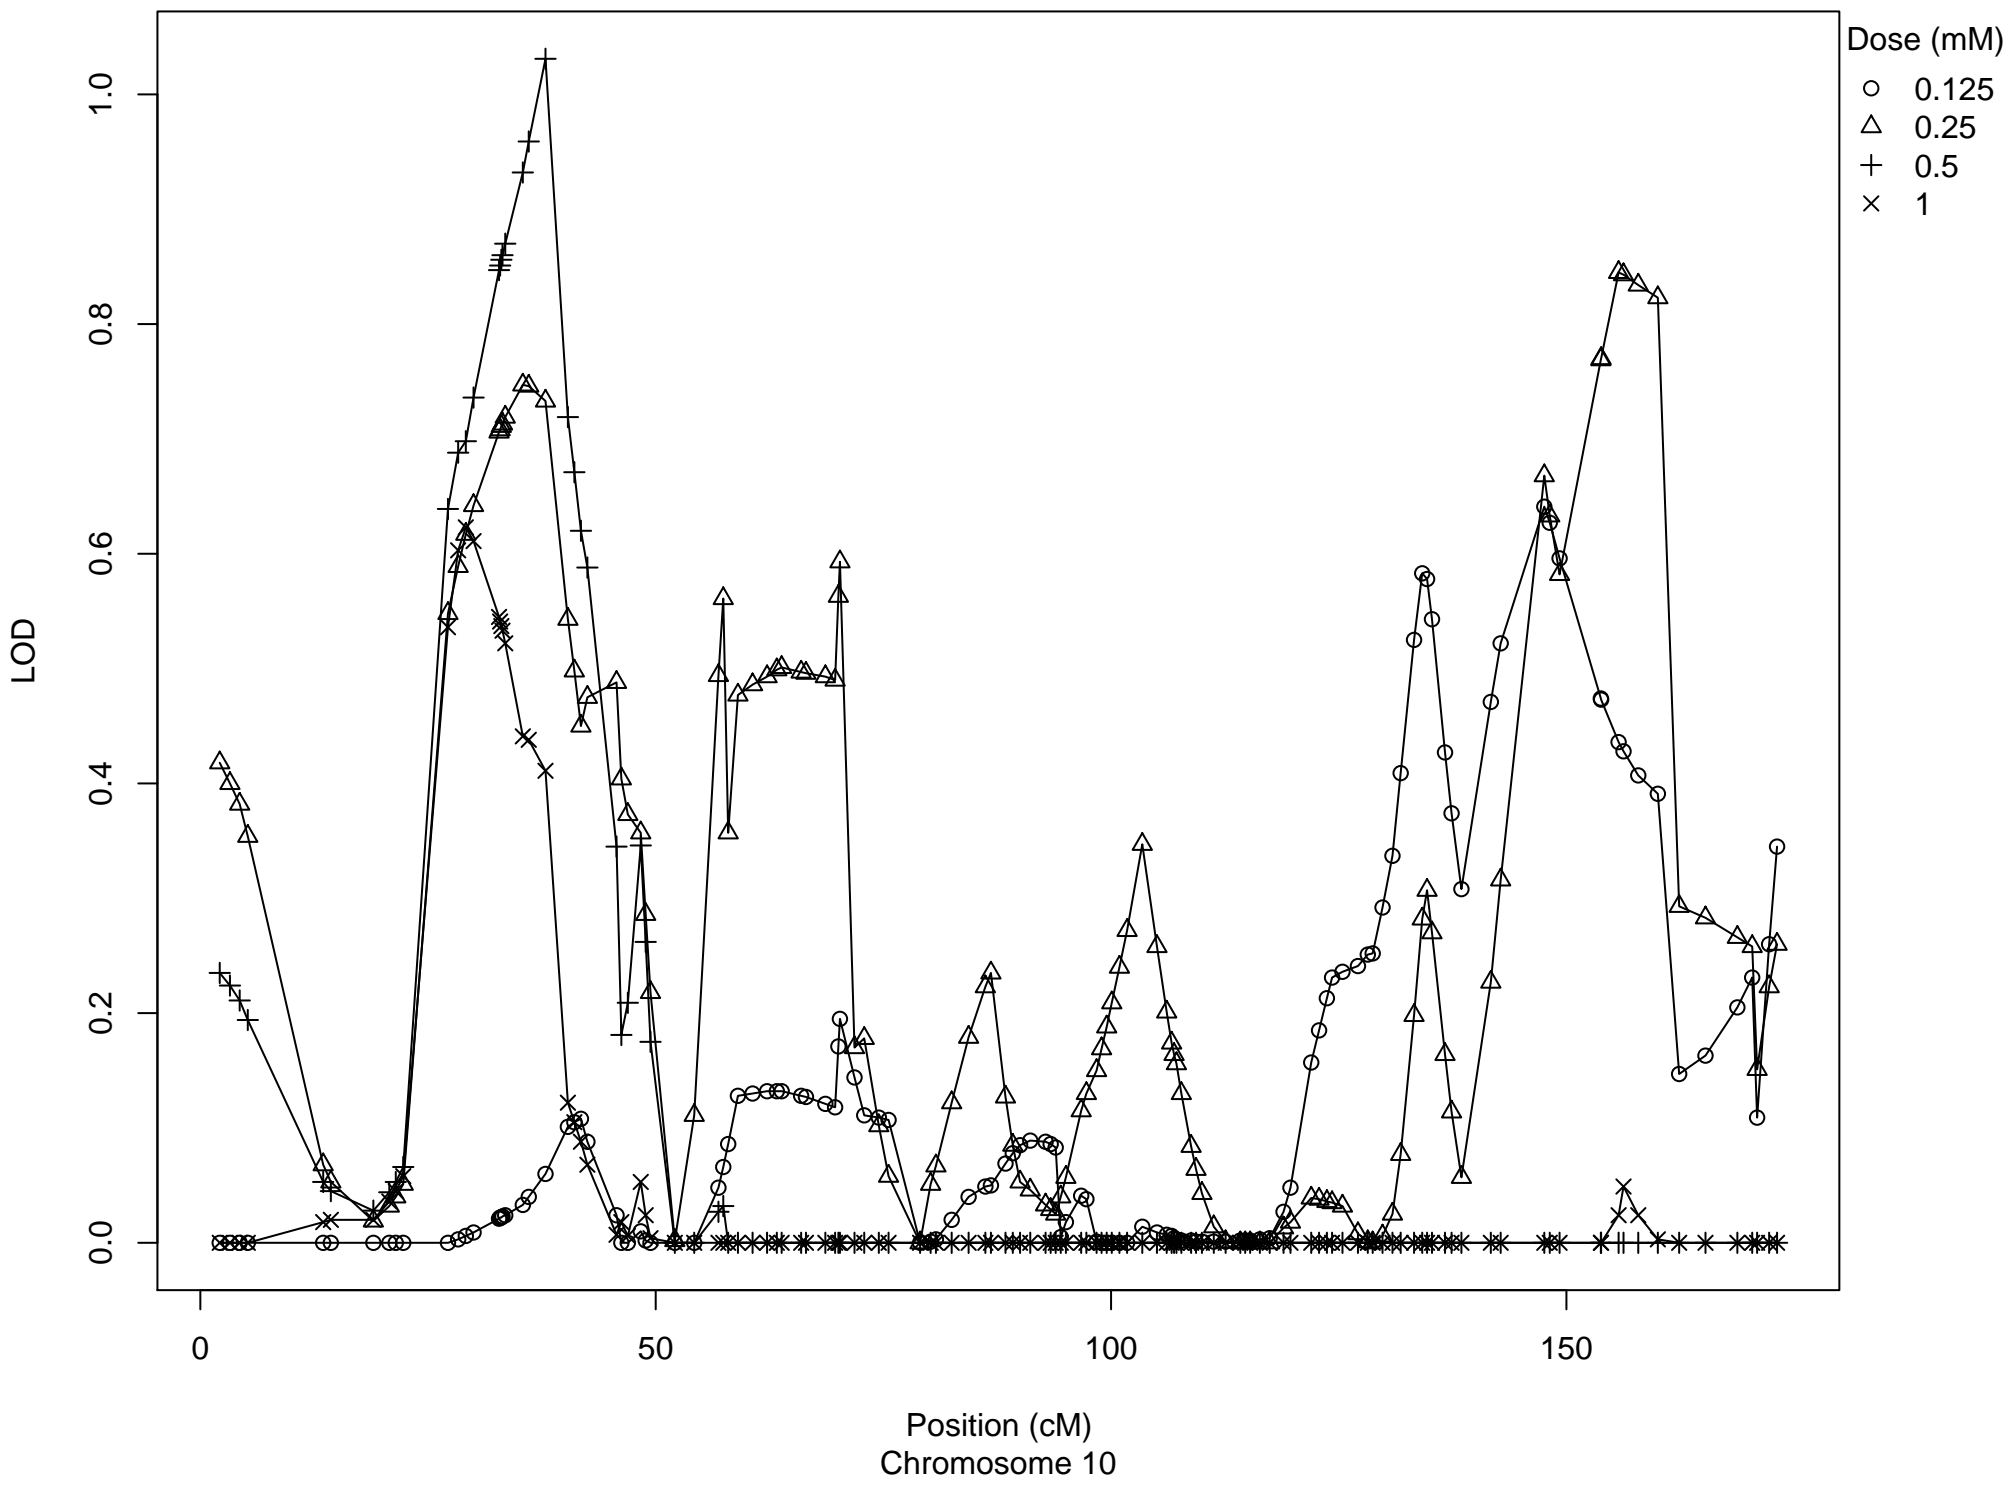

# Temozolomide (Temo)

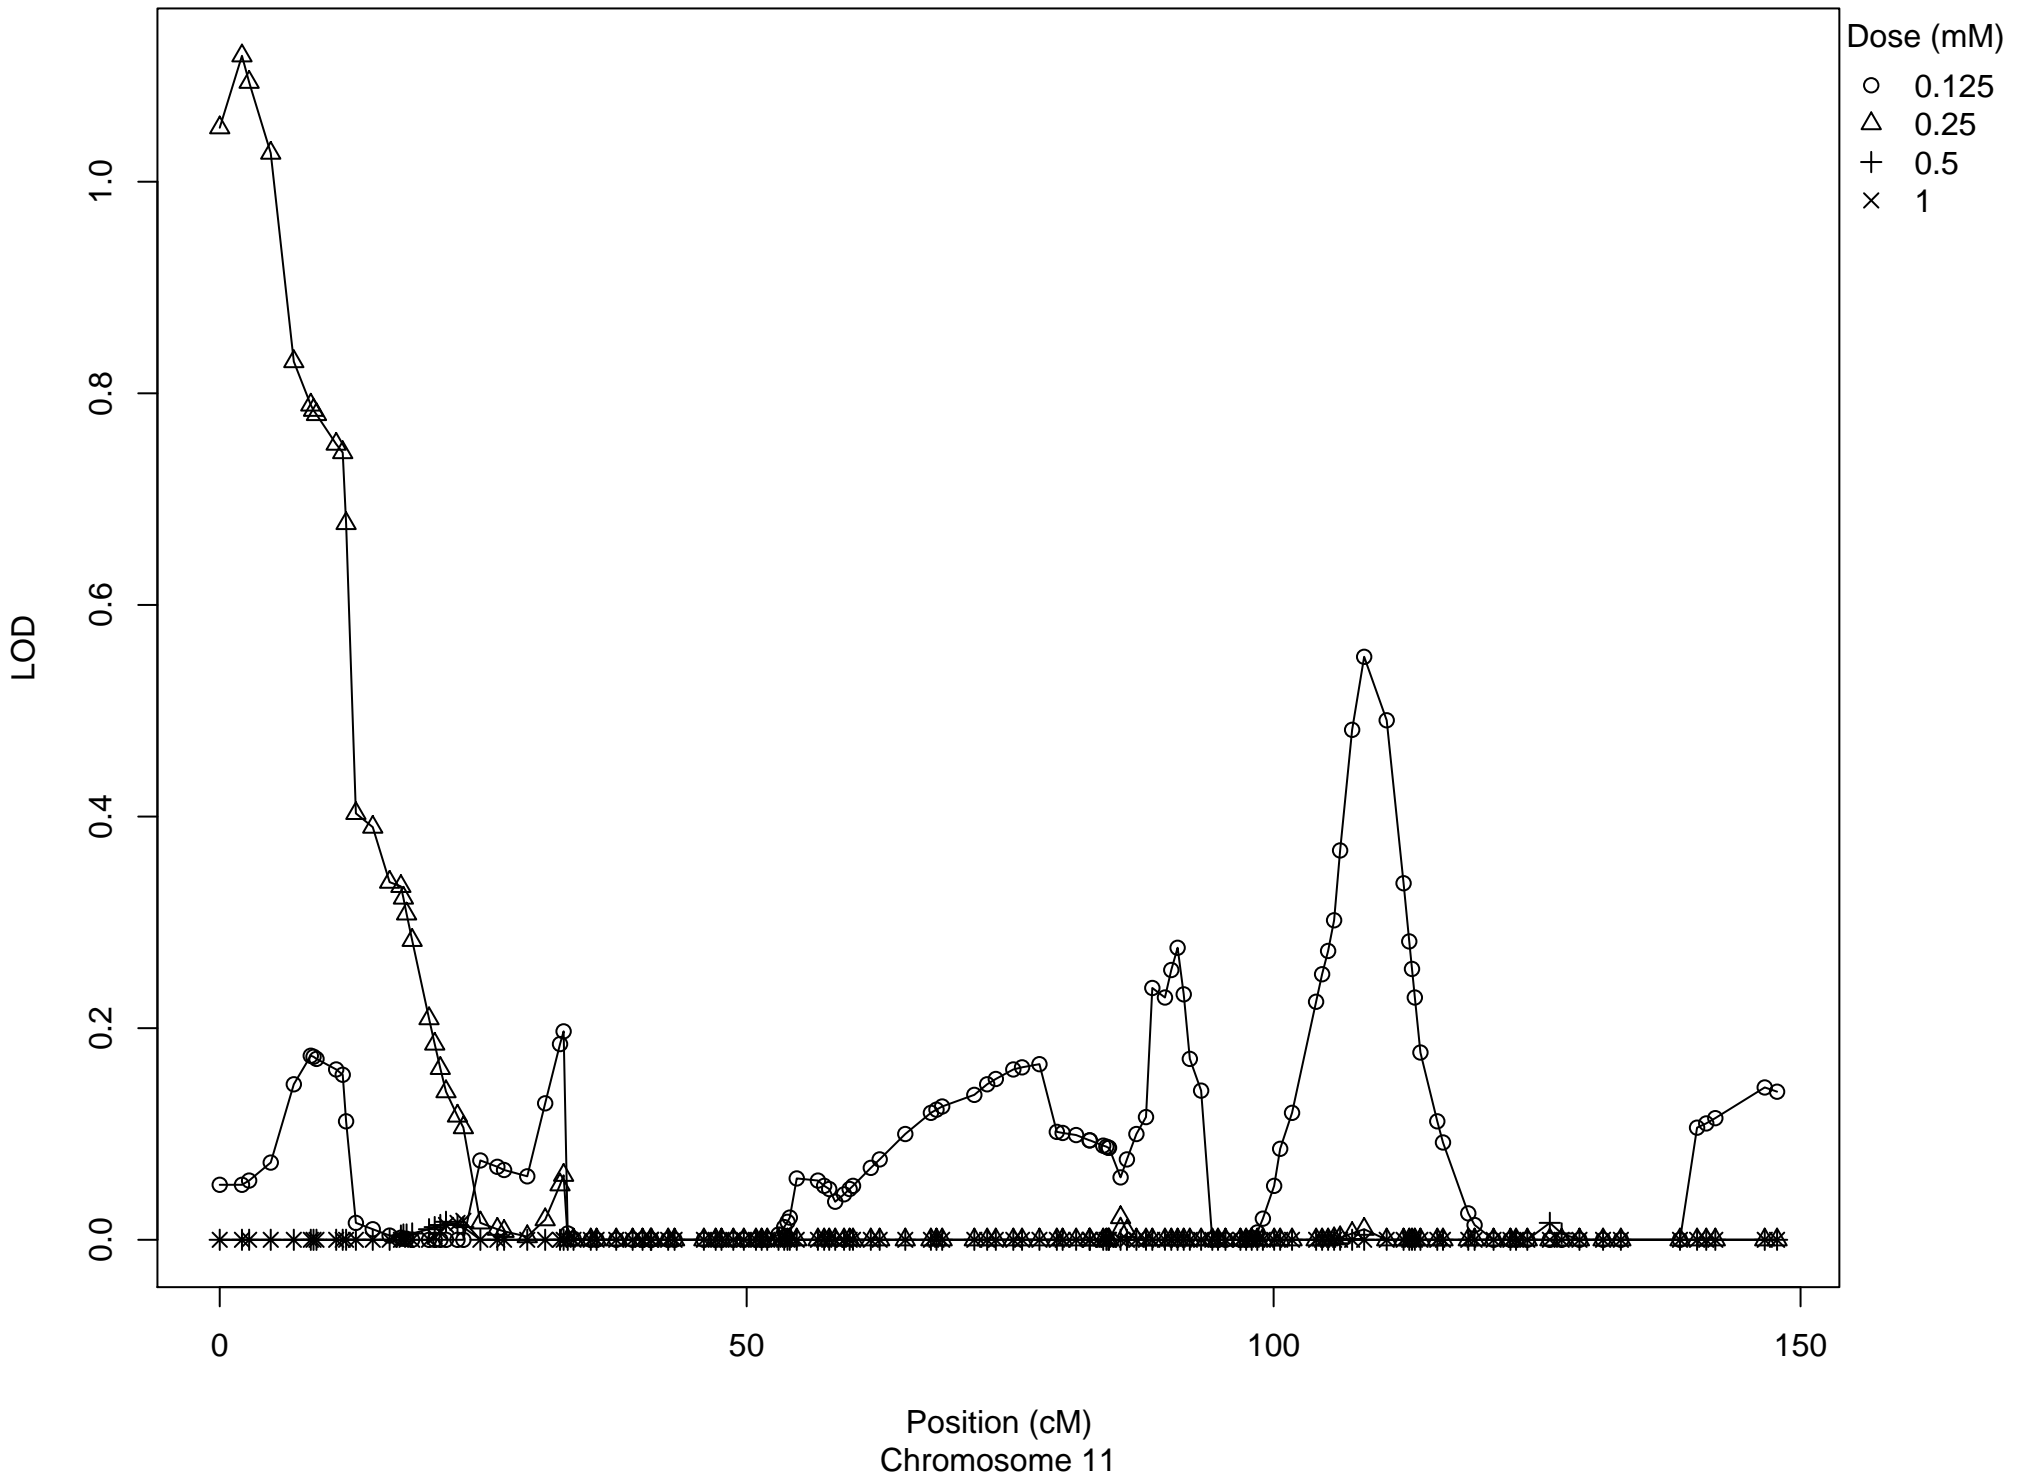

# Temozolomide (Temo)

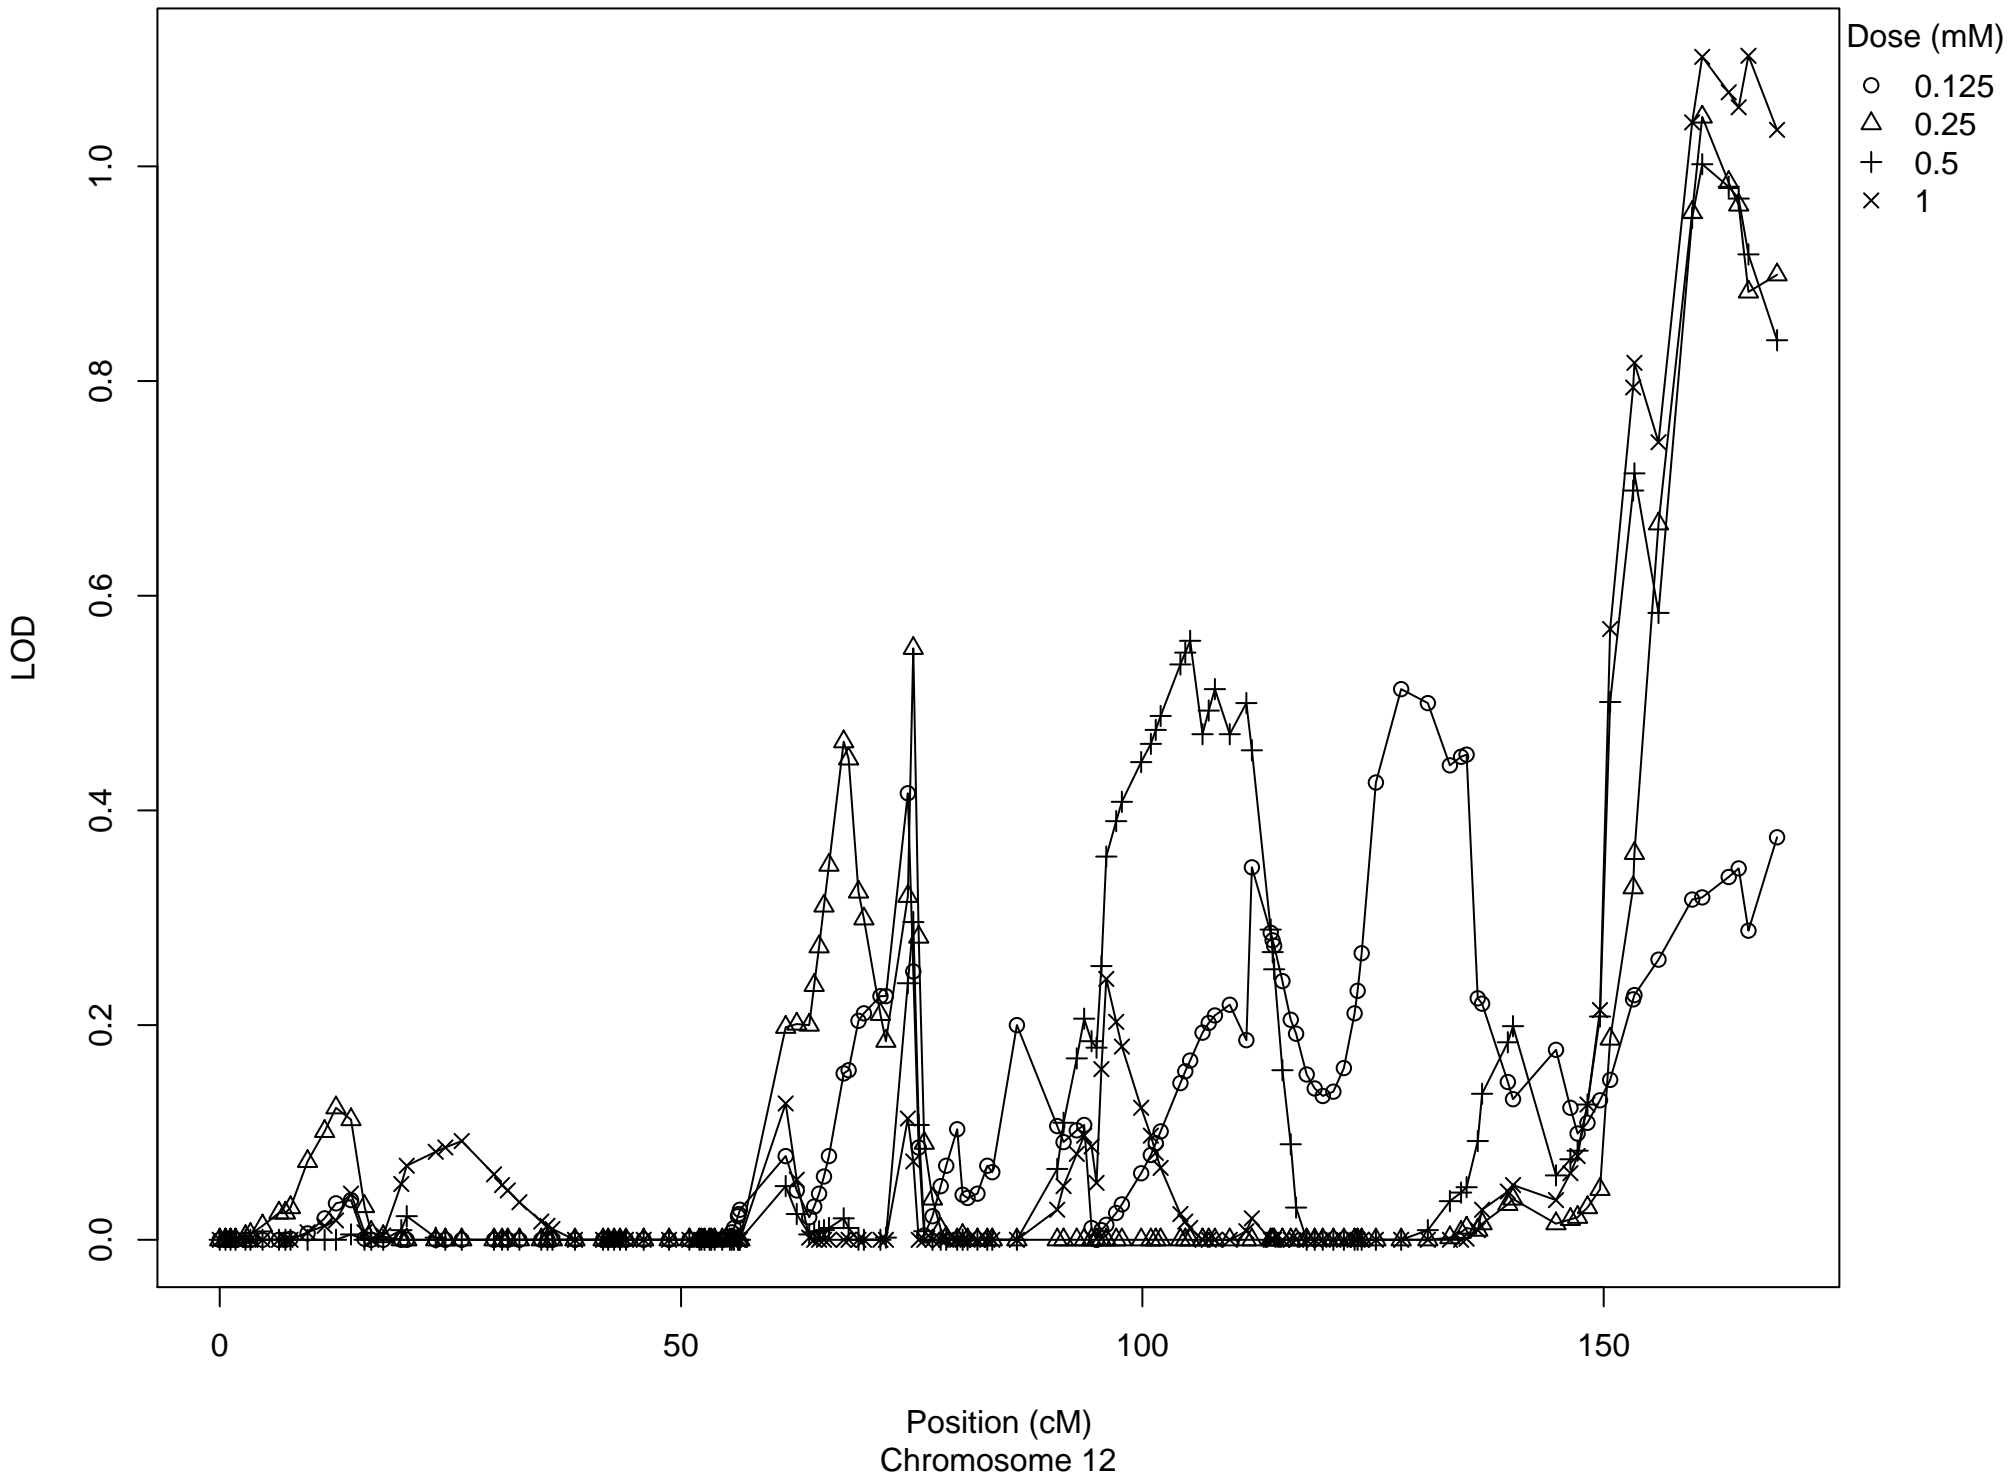

# Temozolomide (Temo)

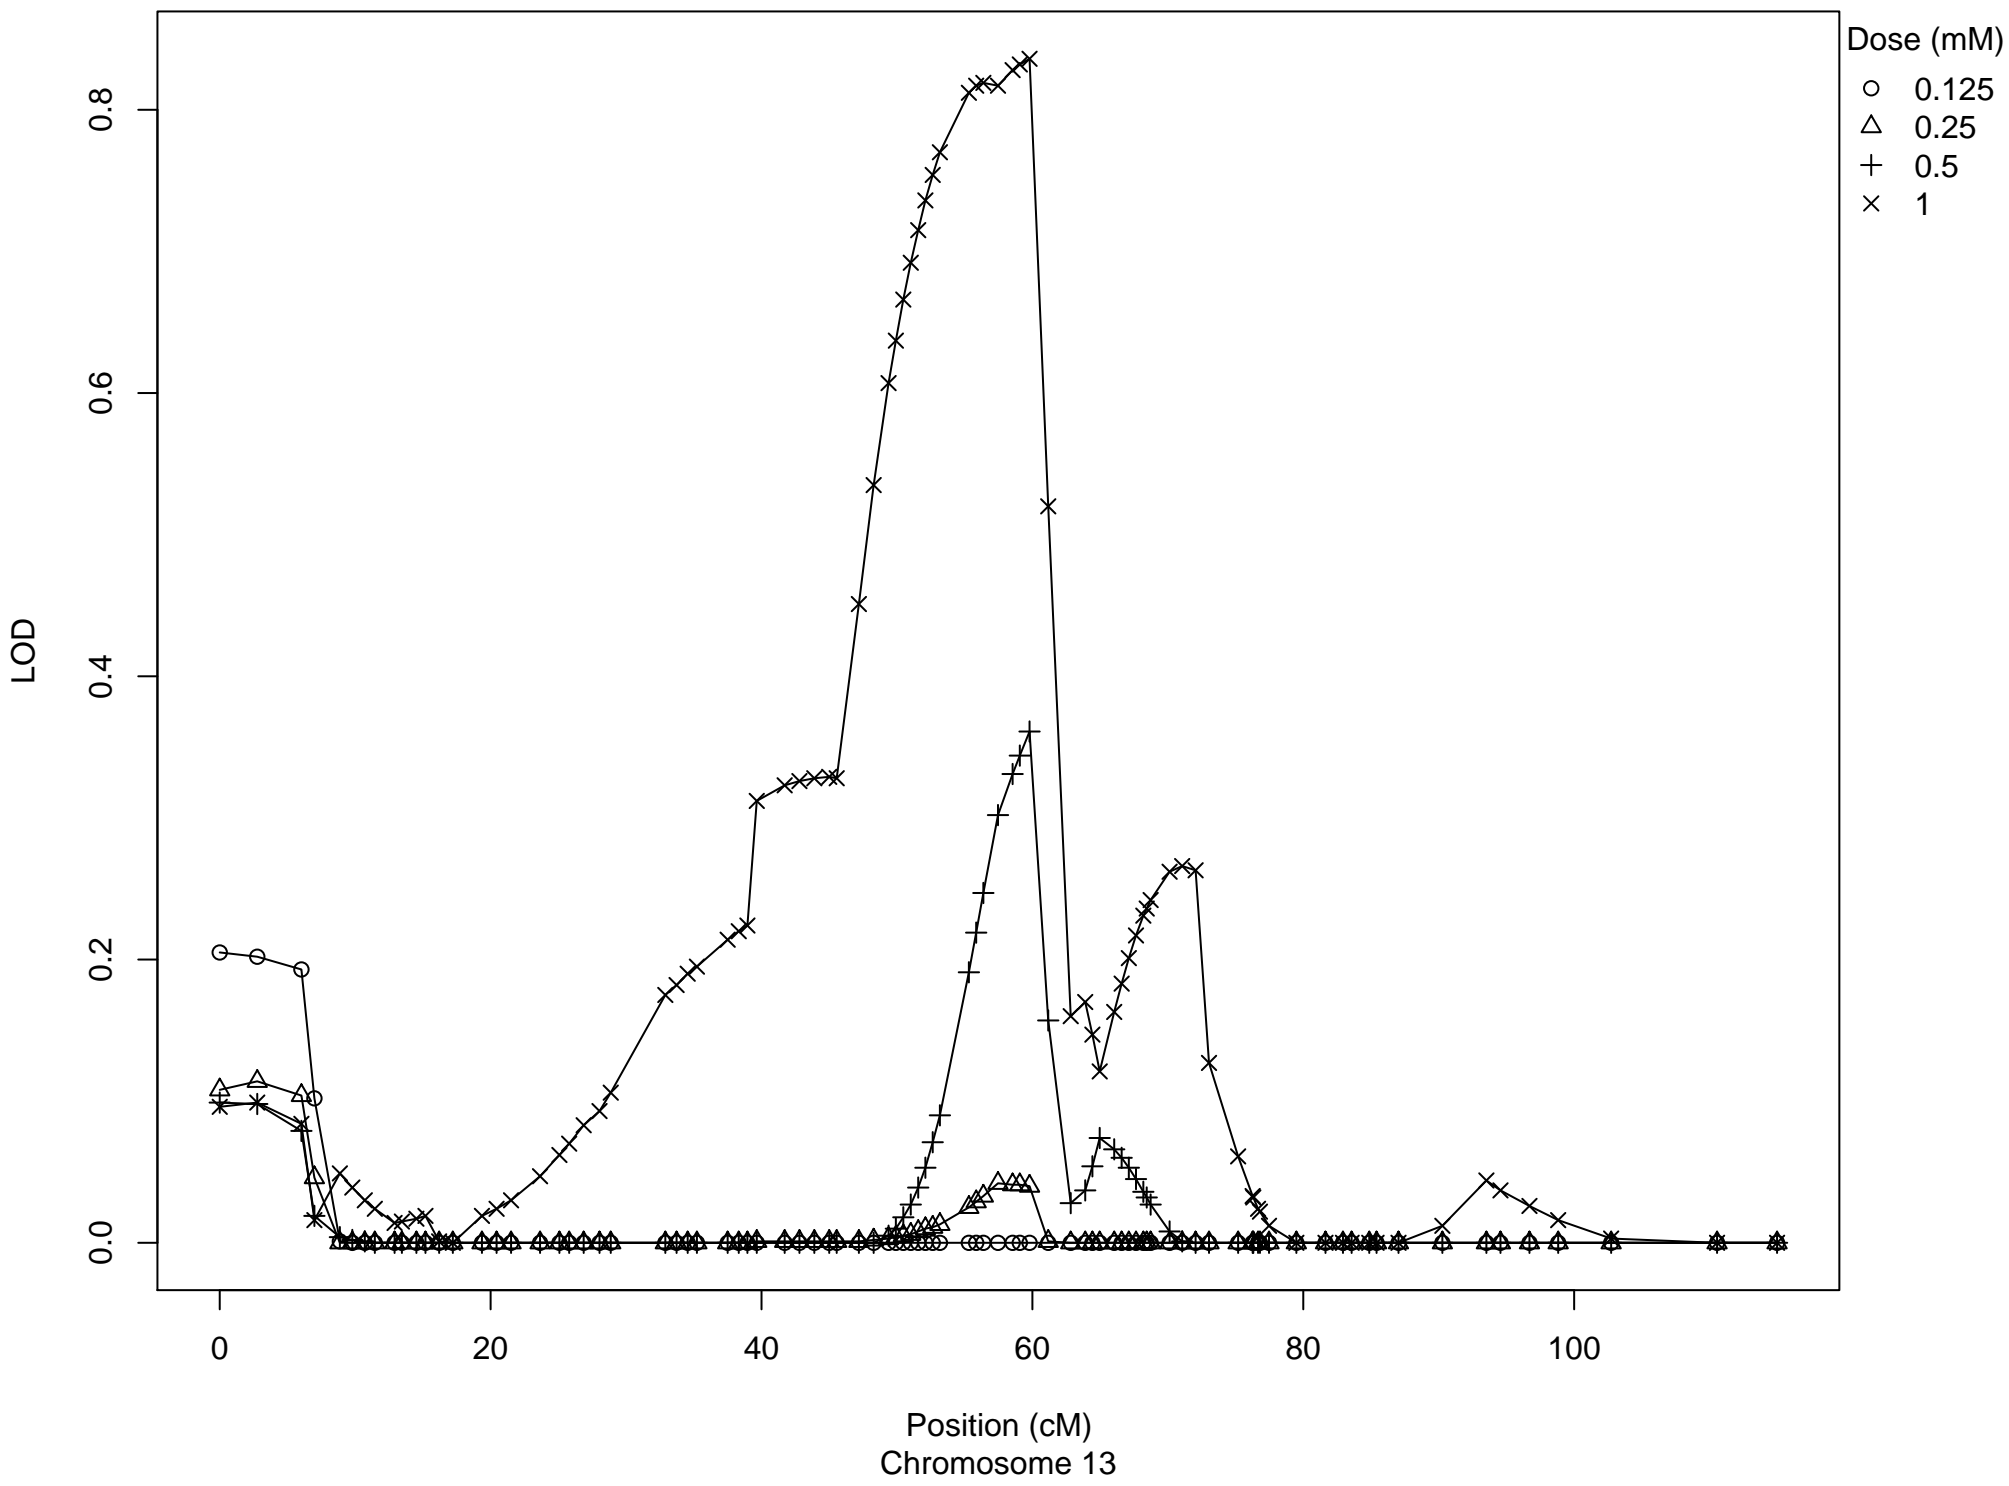

# Temozolomide (Temo)

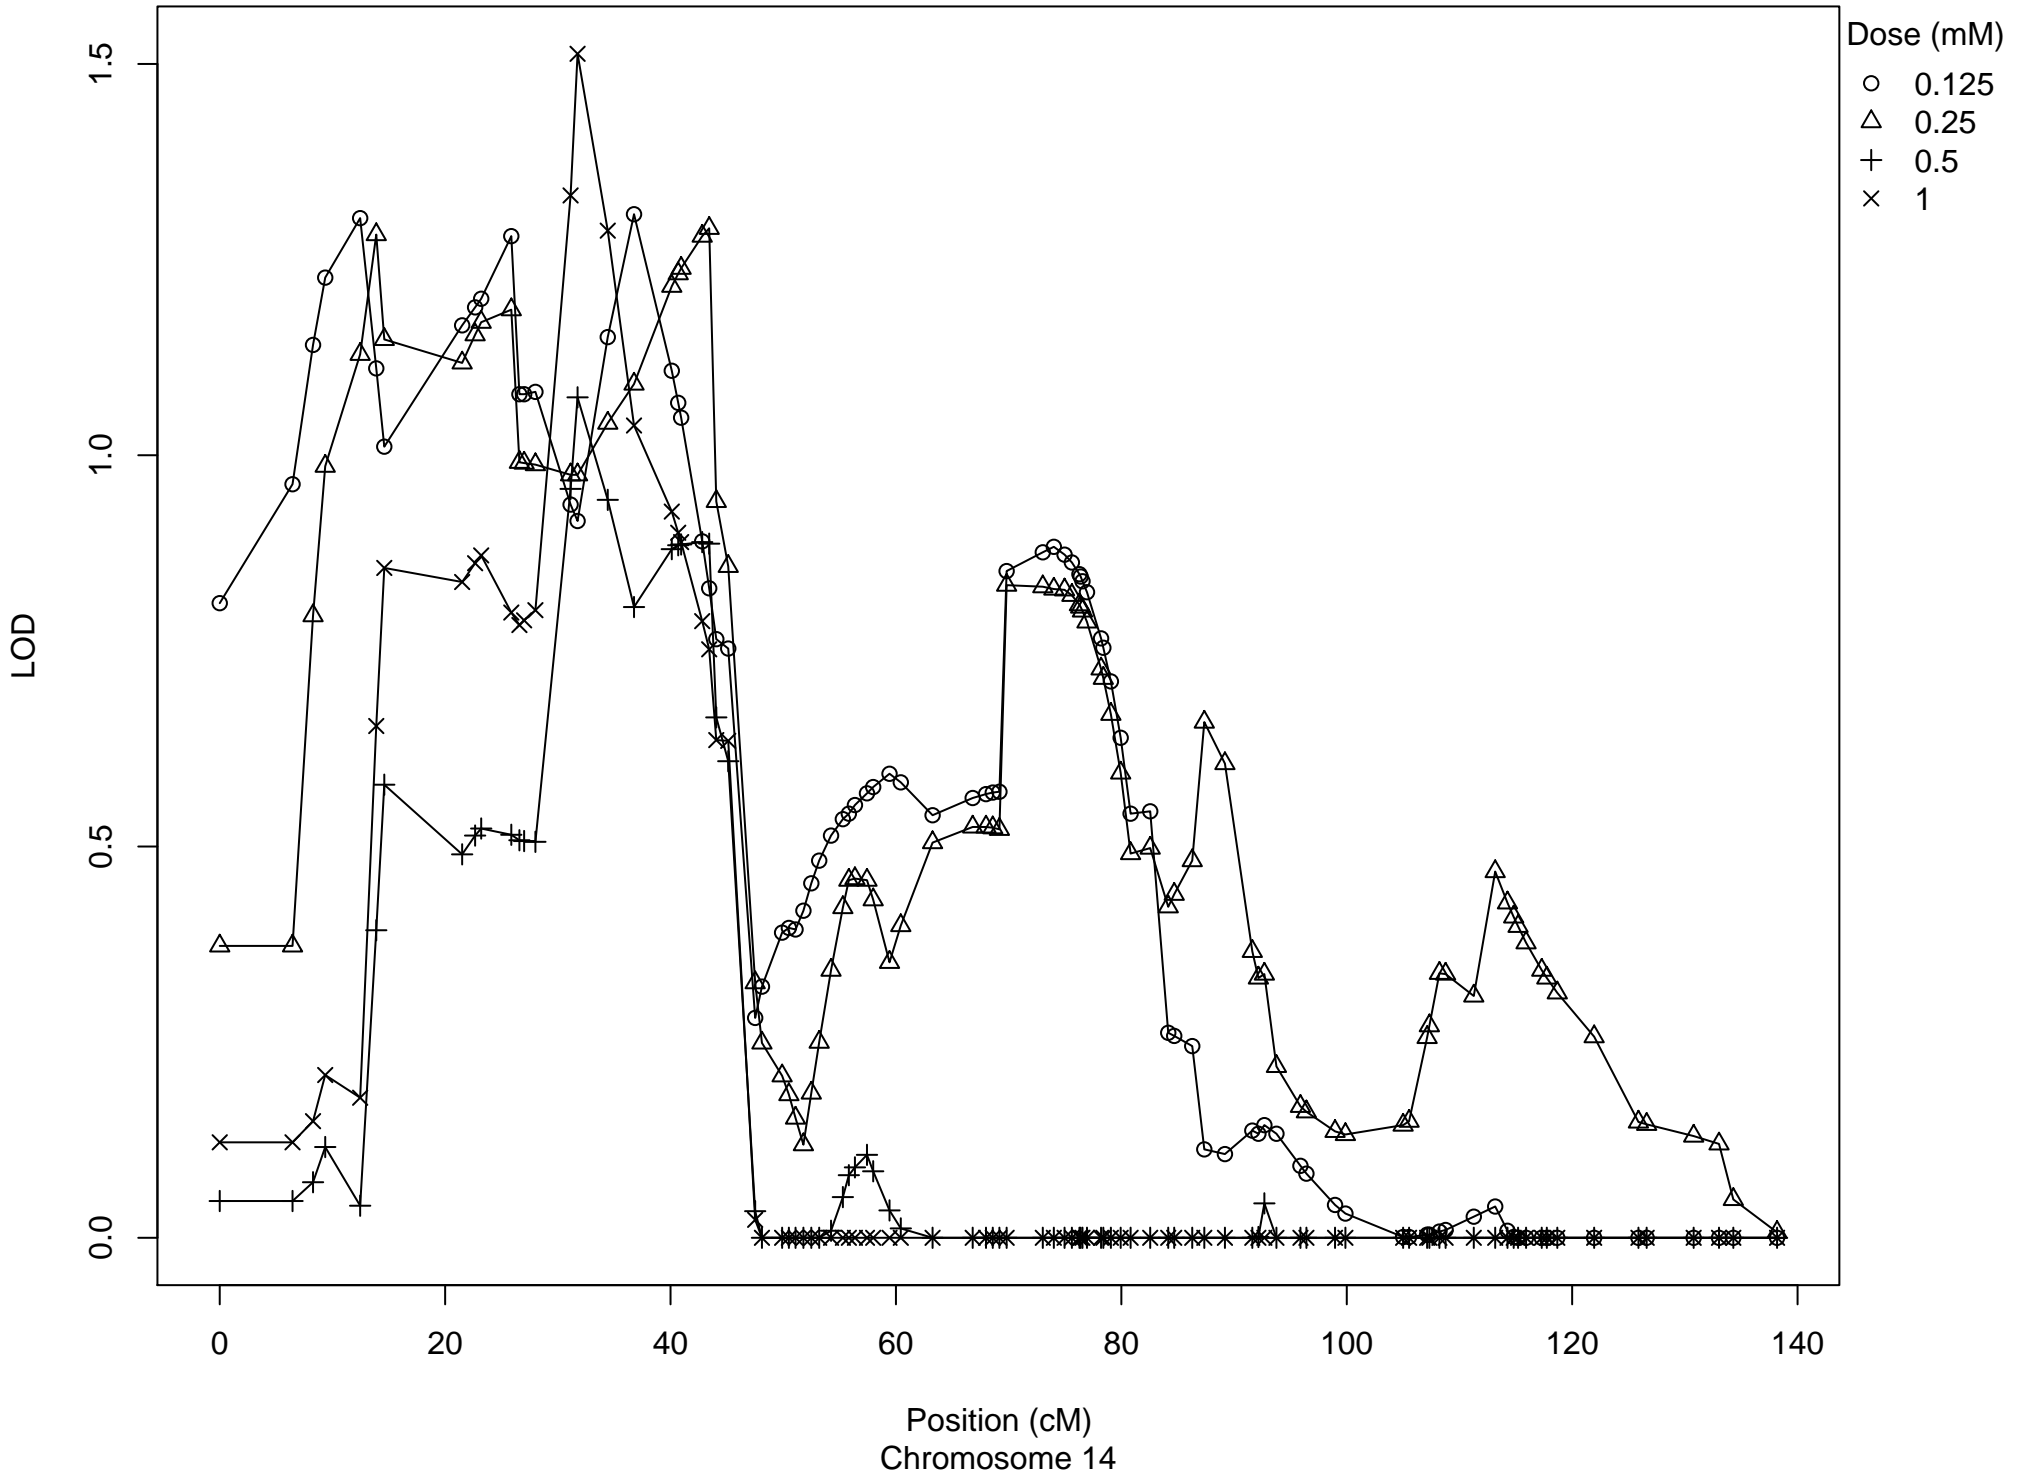



# Temozolomide (Temo)

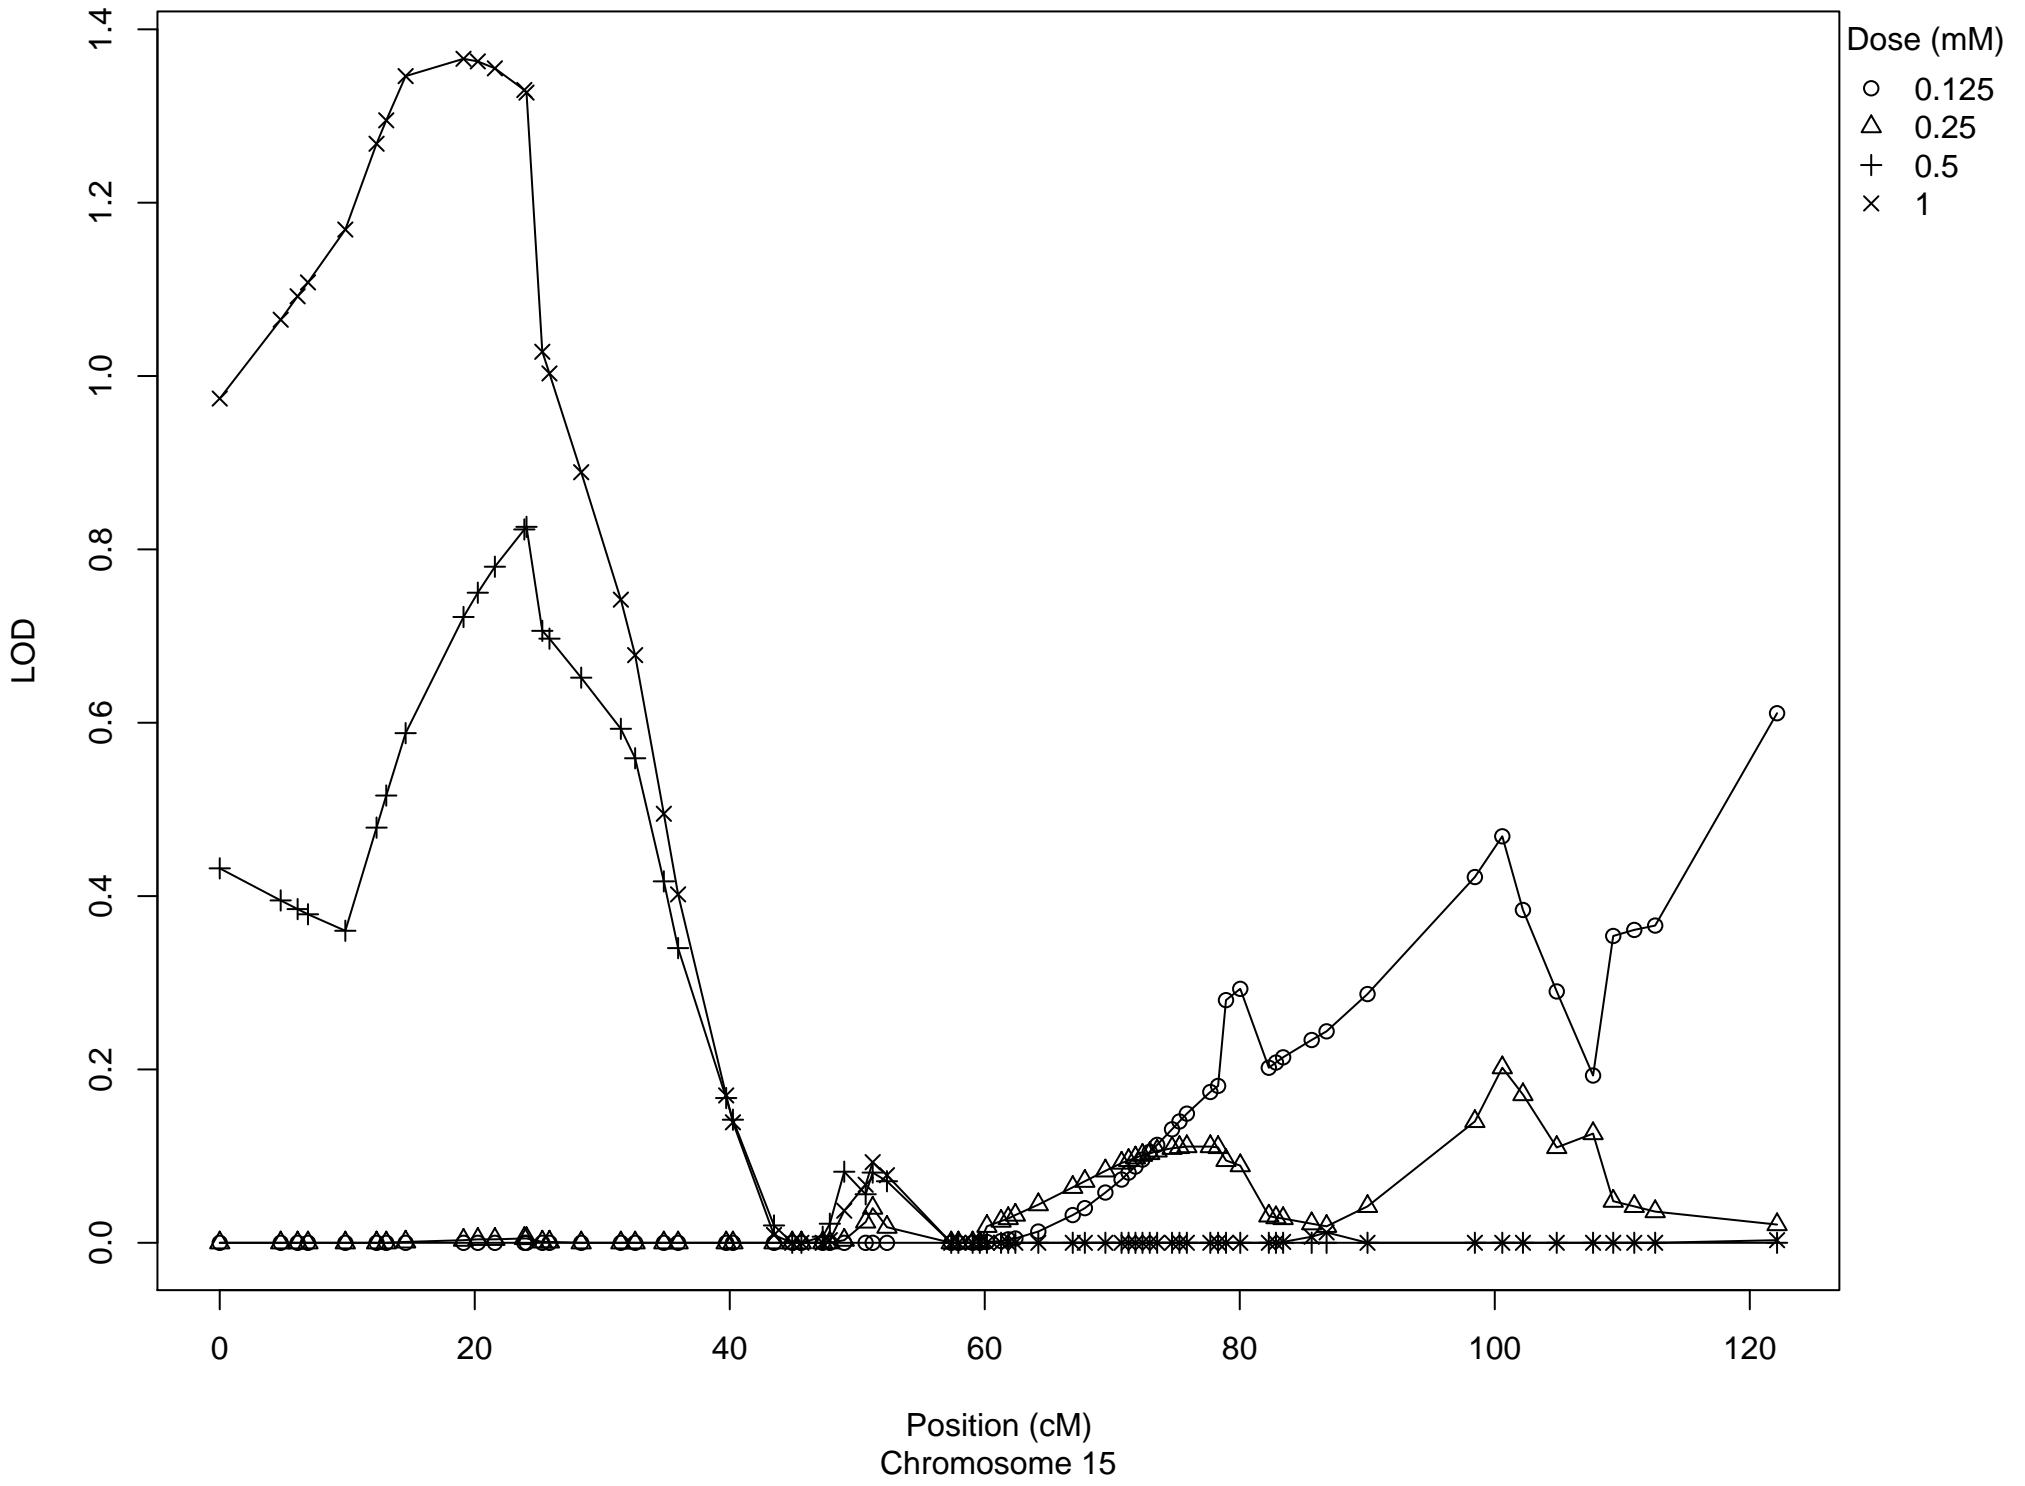

# Temozolomide (Temo)

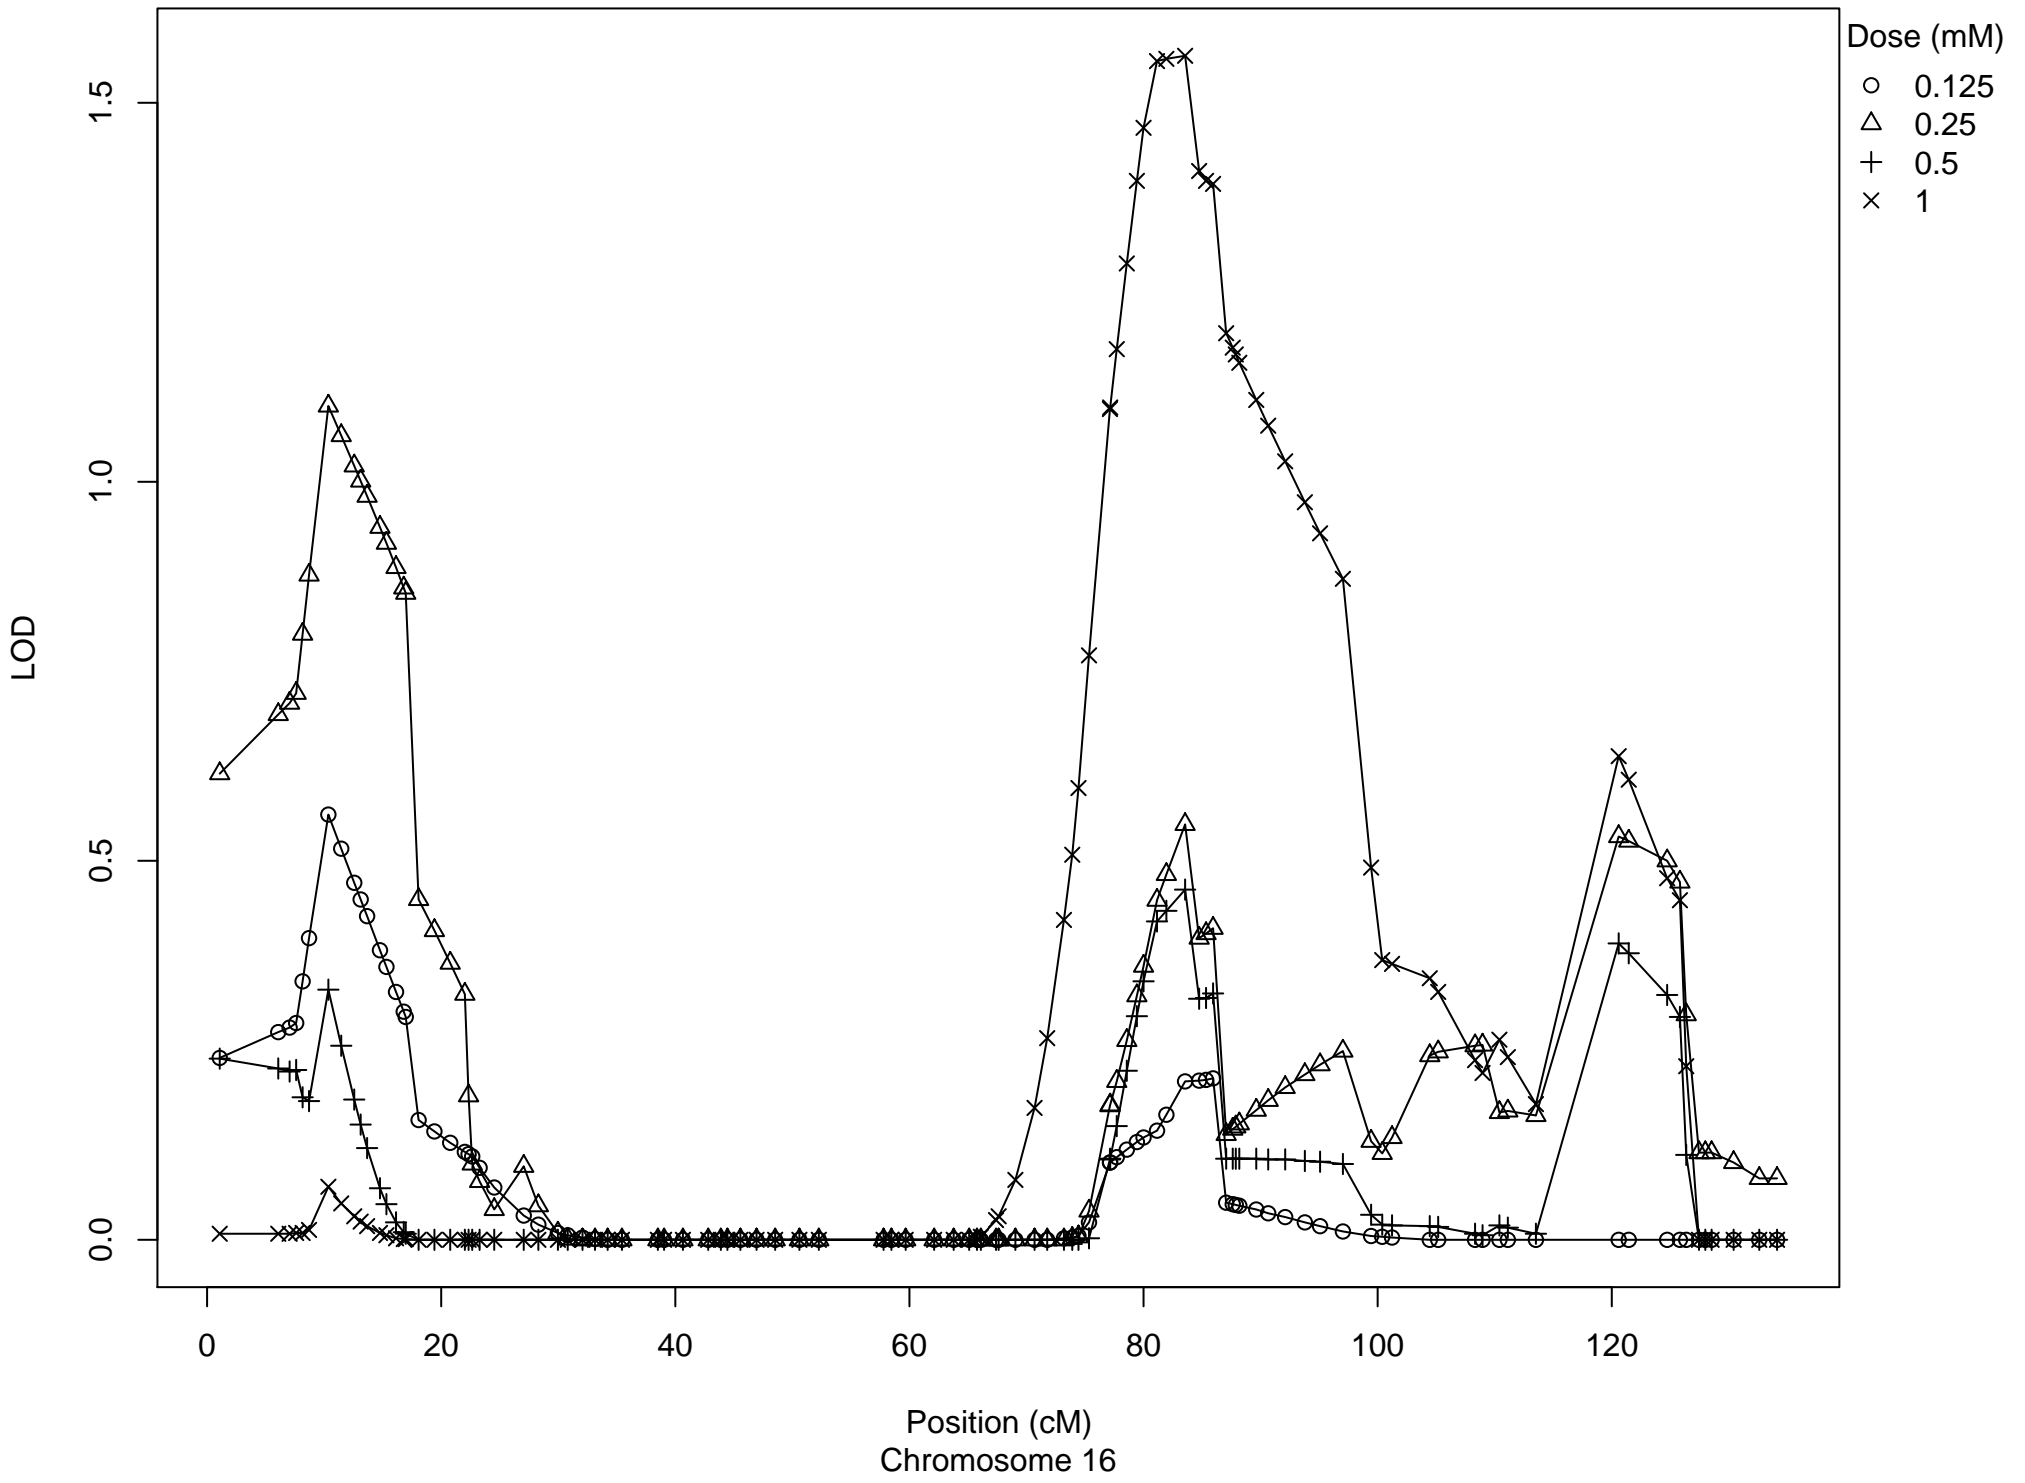

# Temozolomide (Temo)

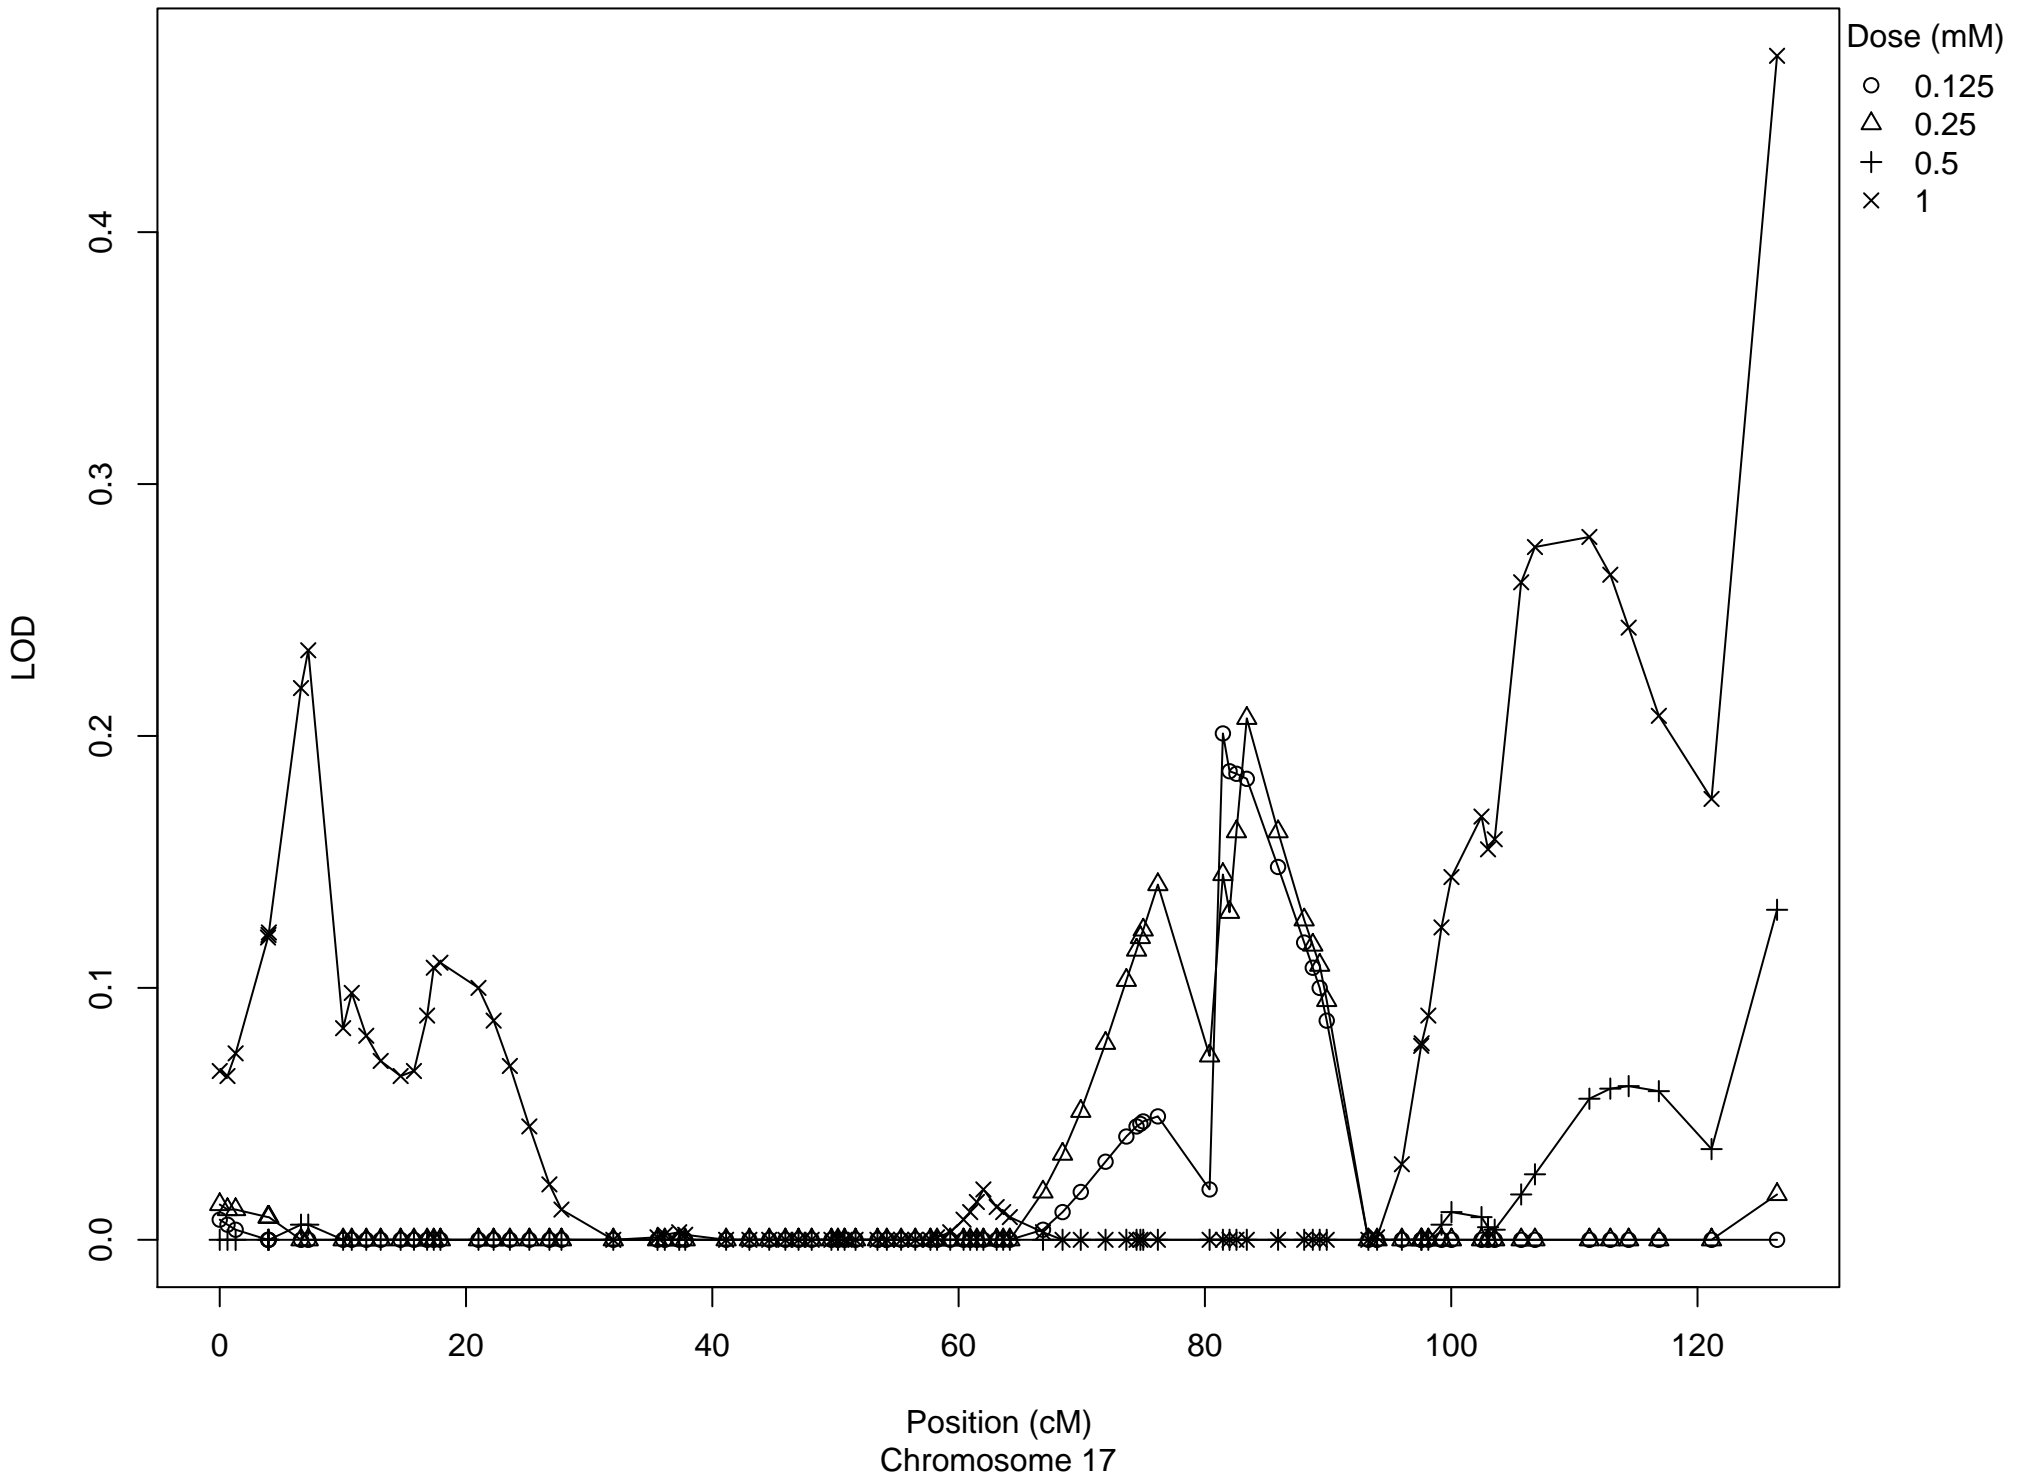

# Temozolomide (Temo)

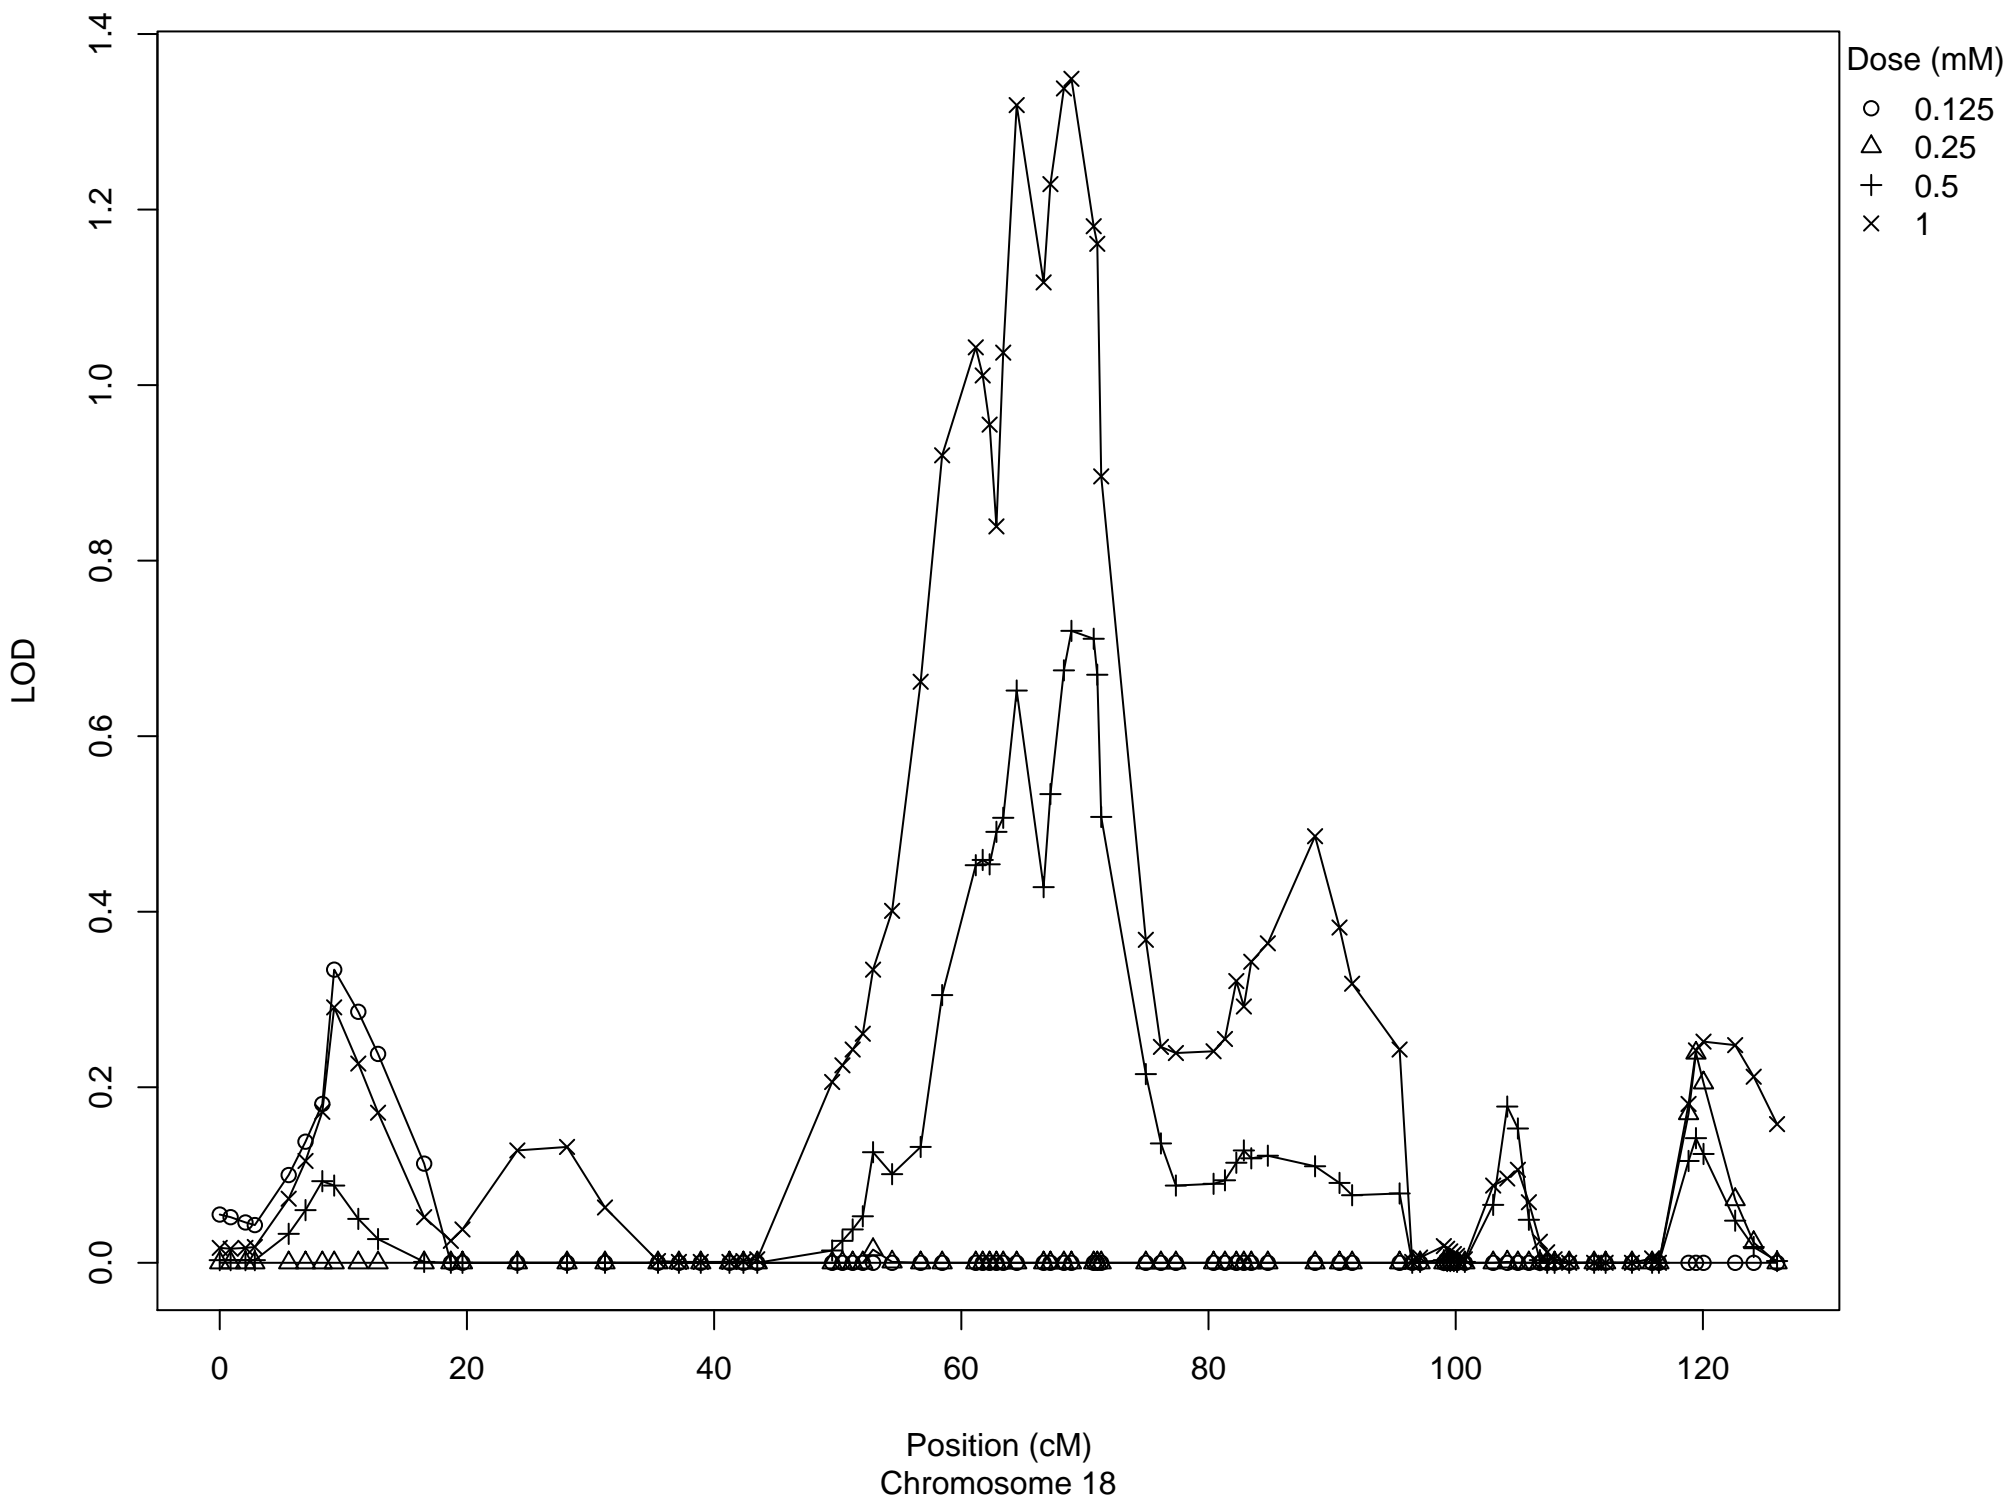

# Temozolomide (Temo)

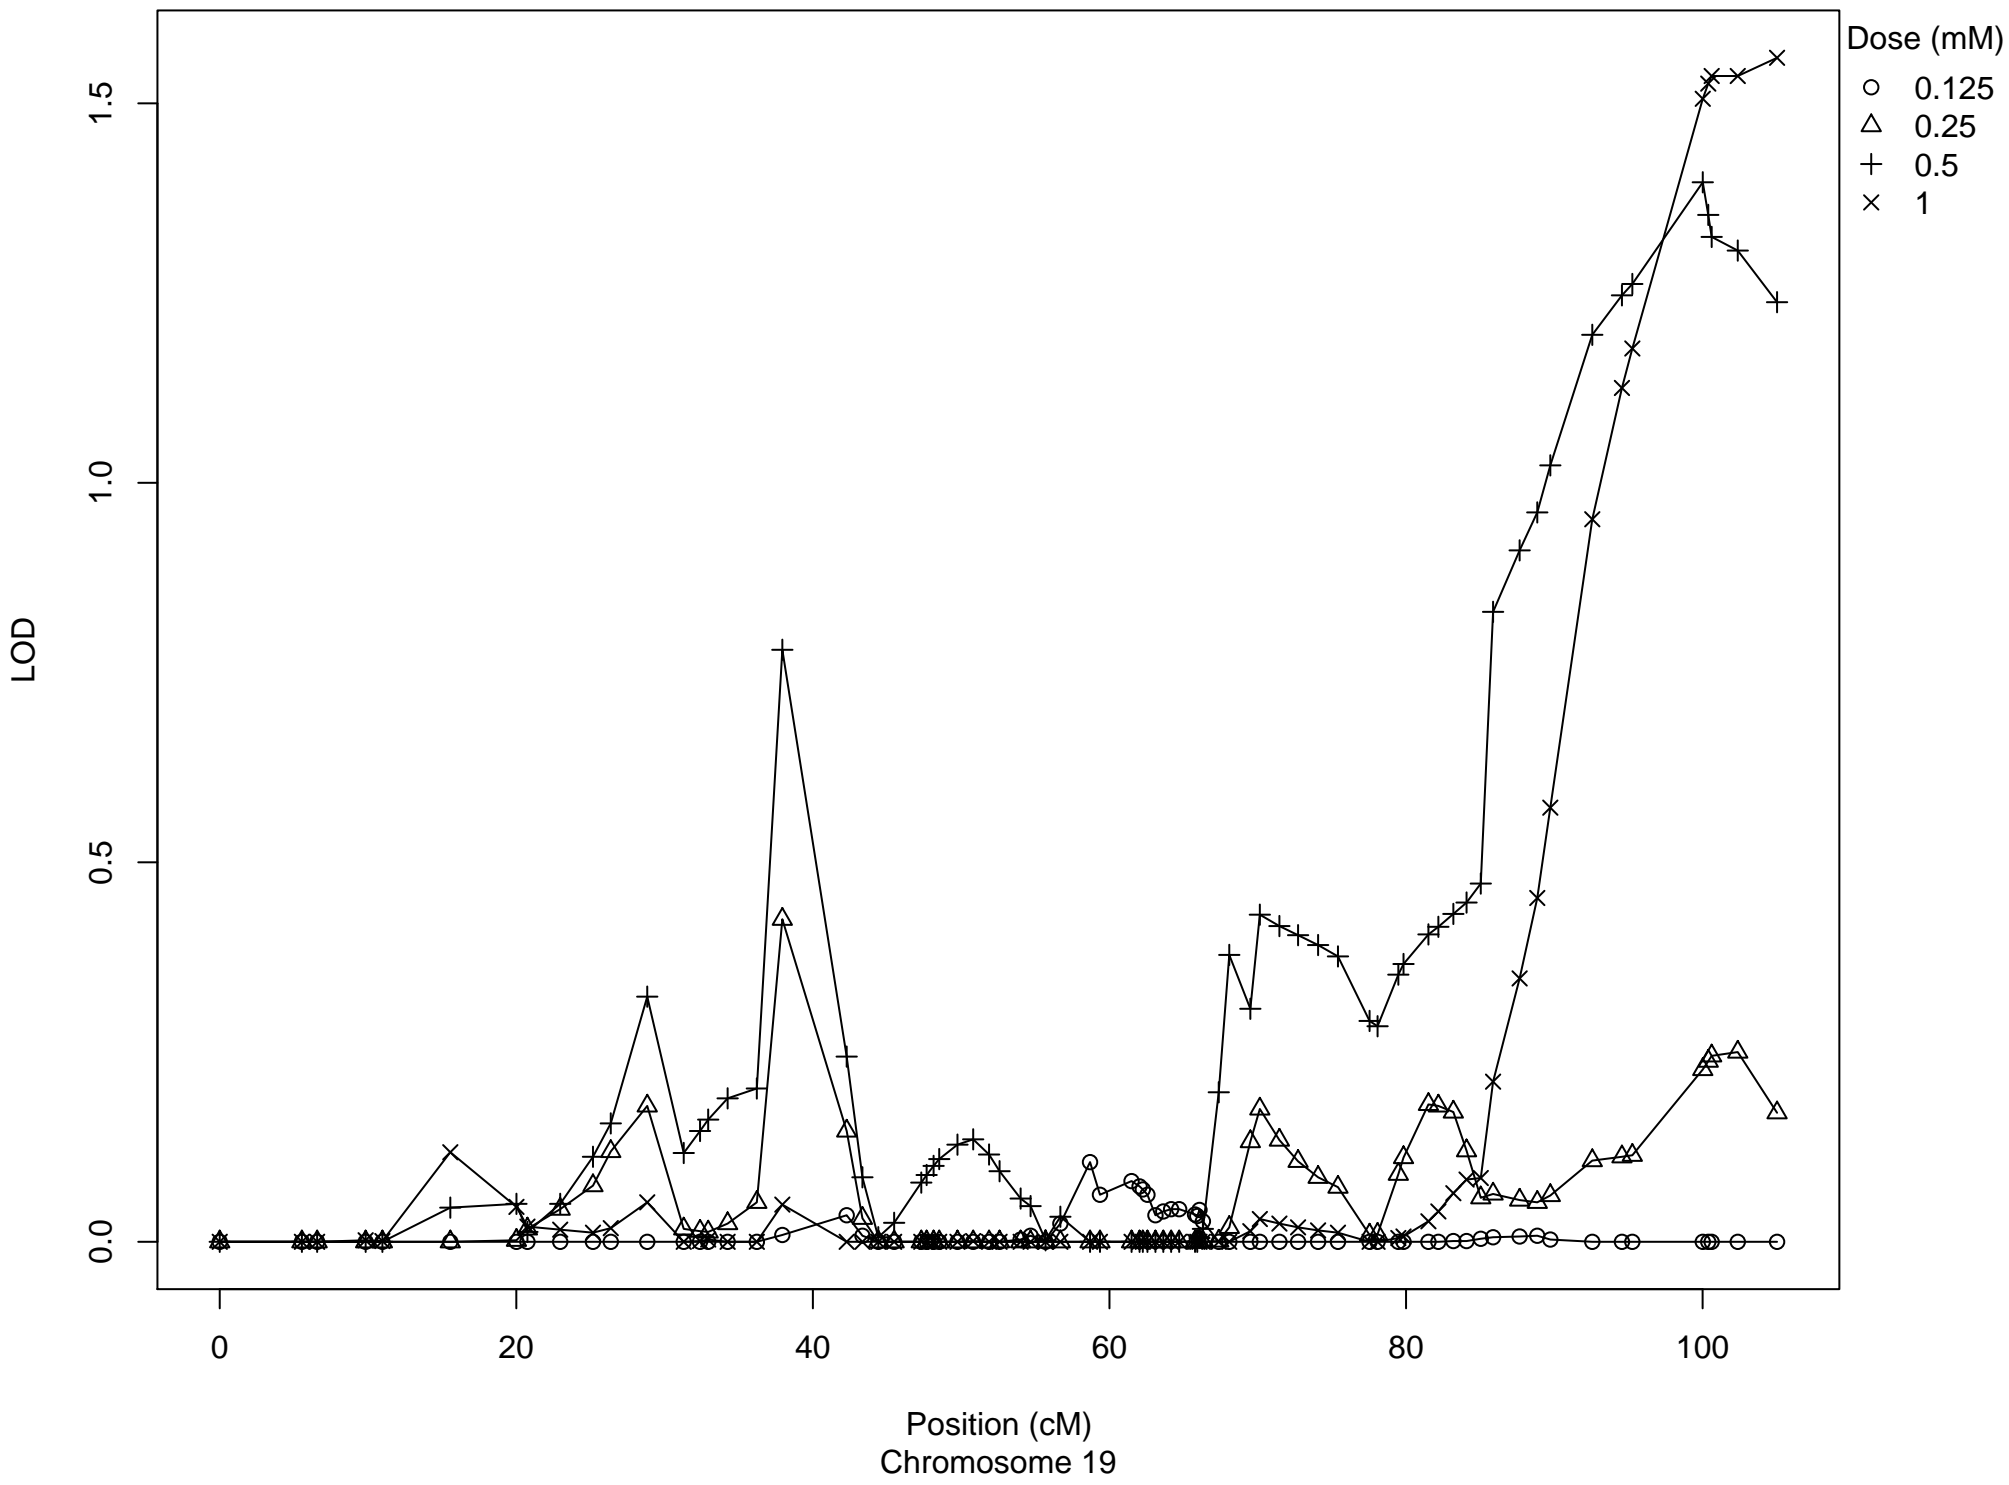

# Temozolomide (Temo)

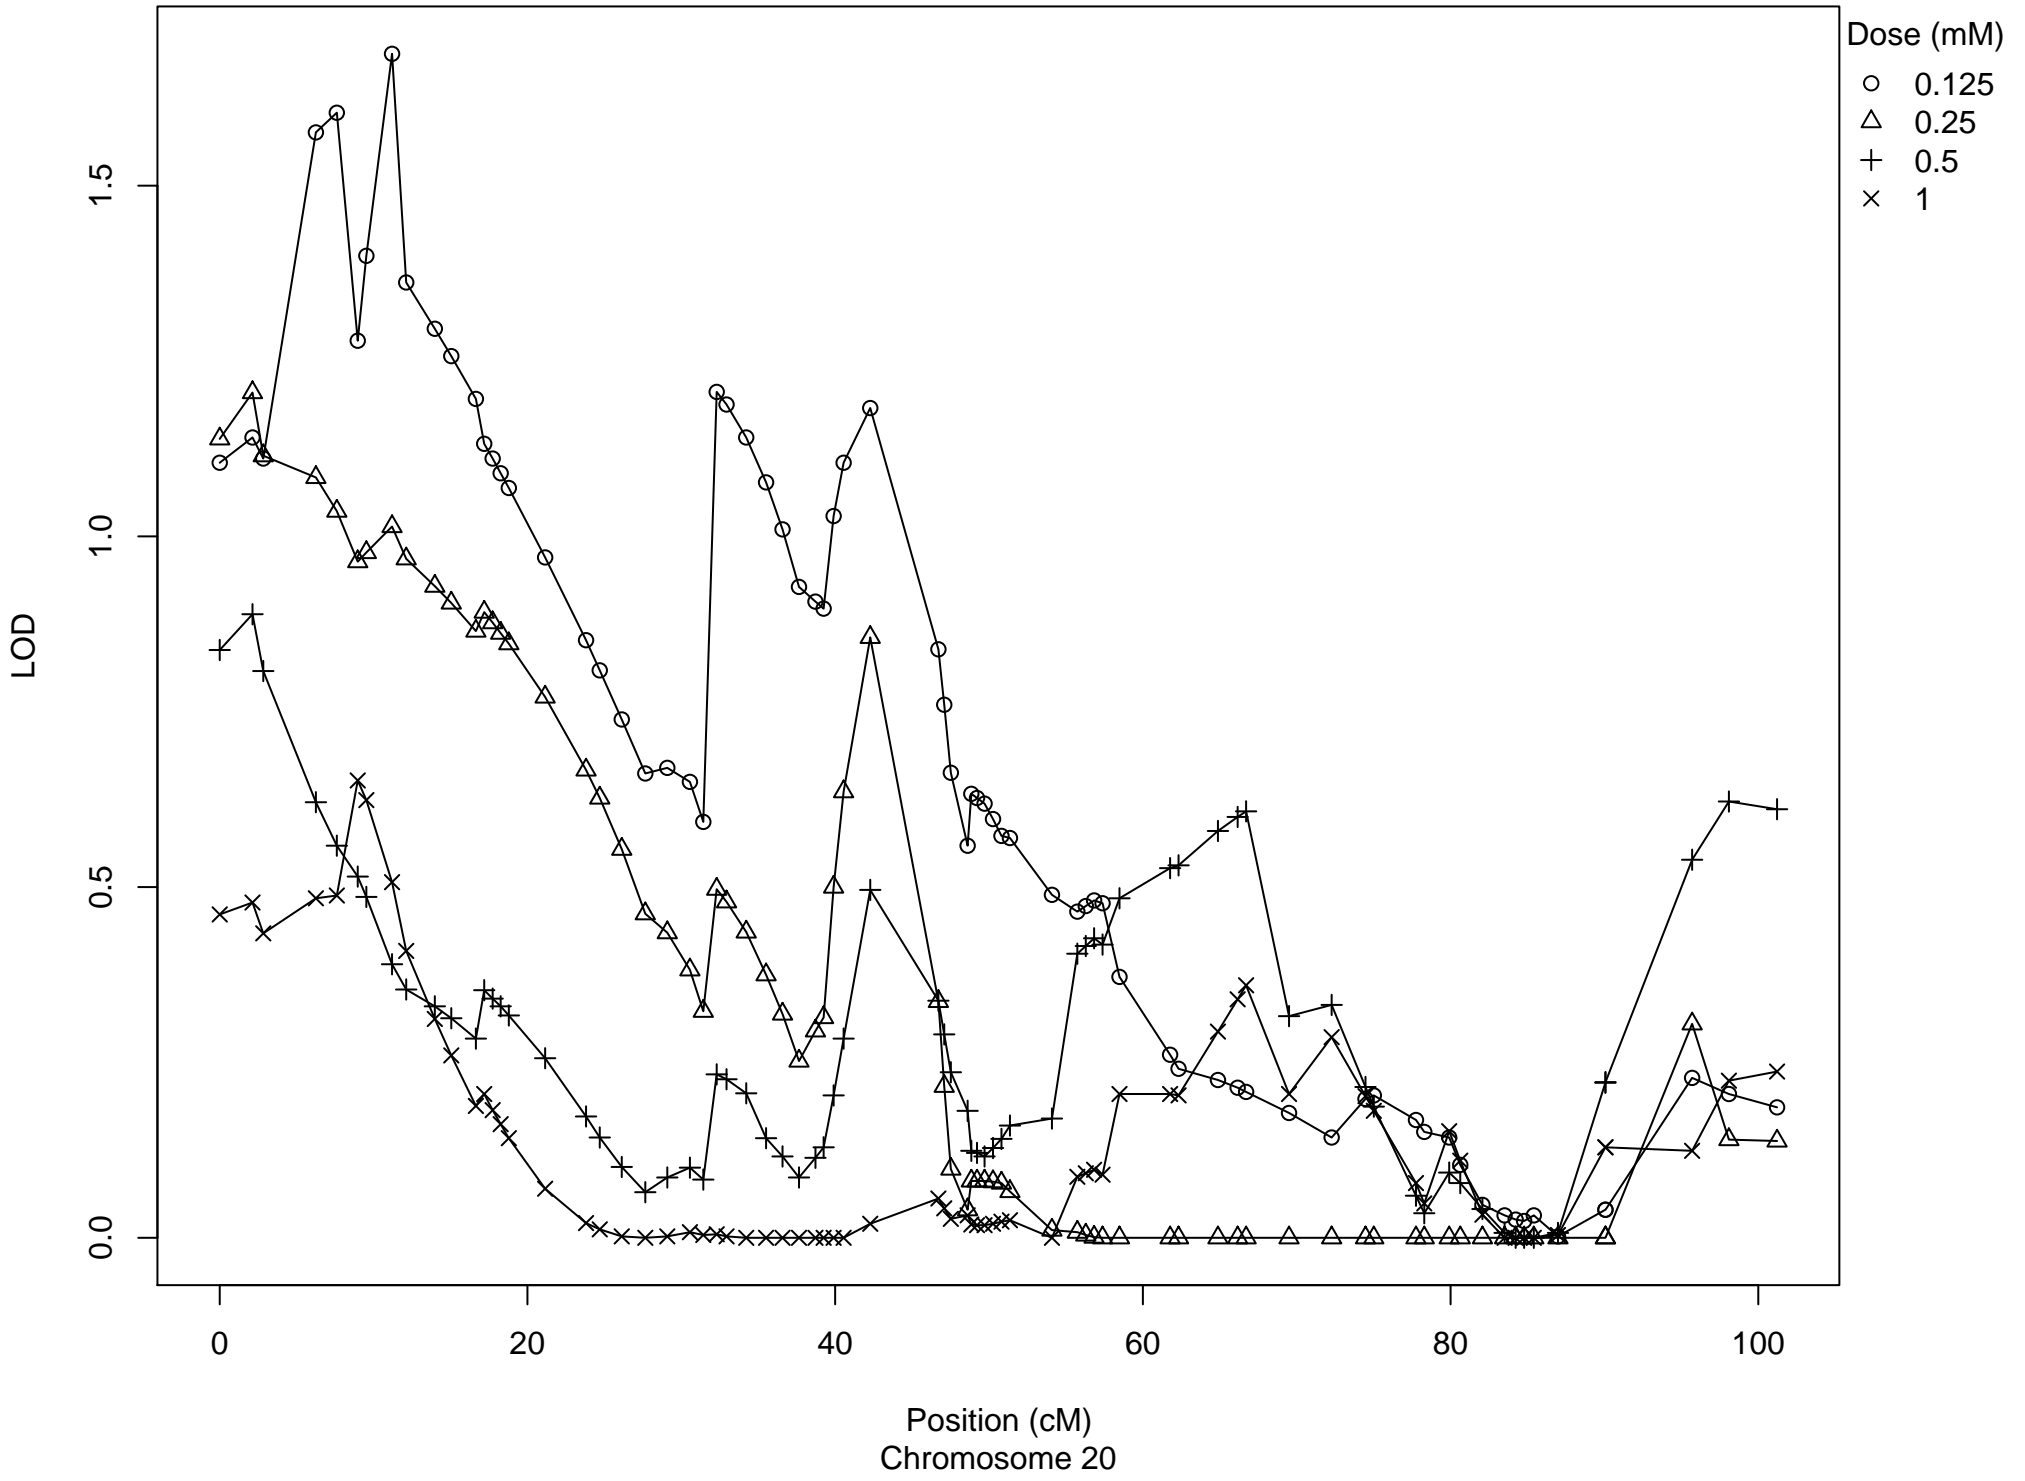

# Temozolomide (Temo)

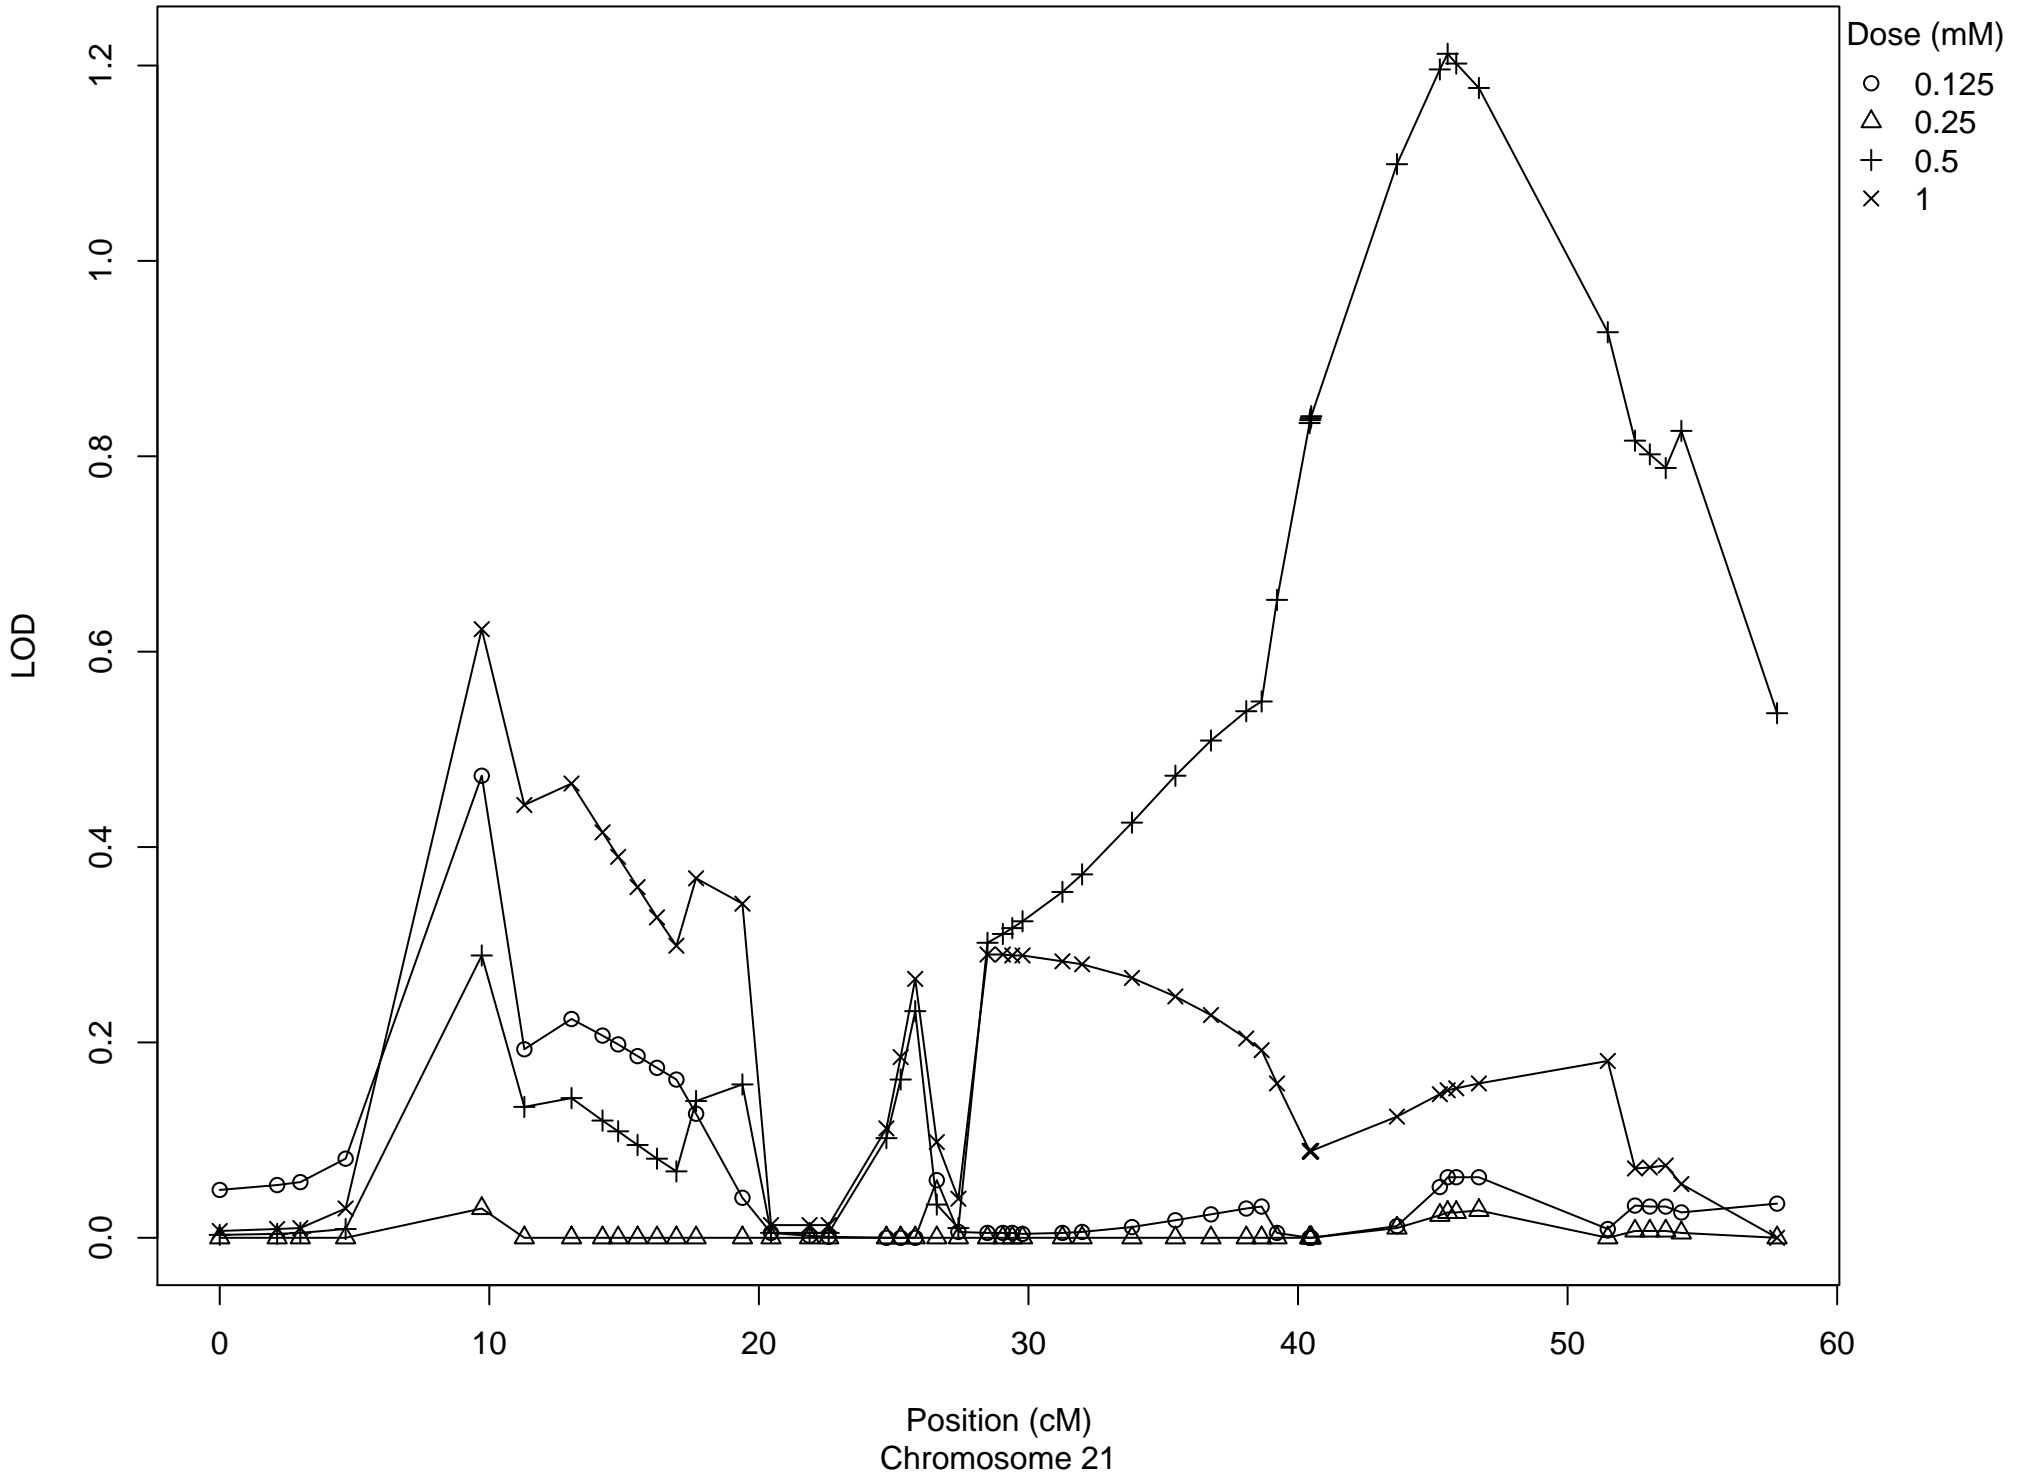

# Temozolomide (Temo)

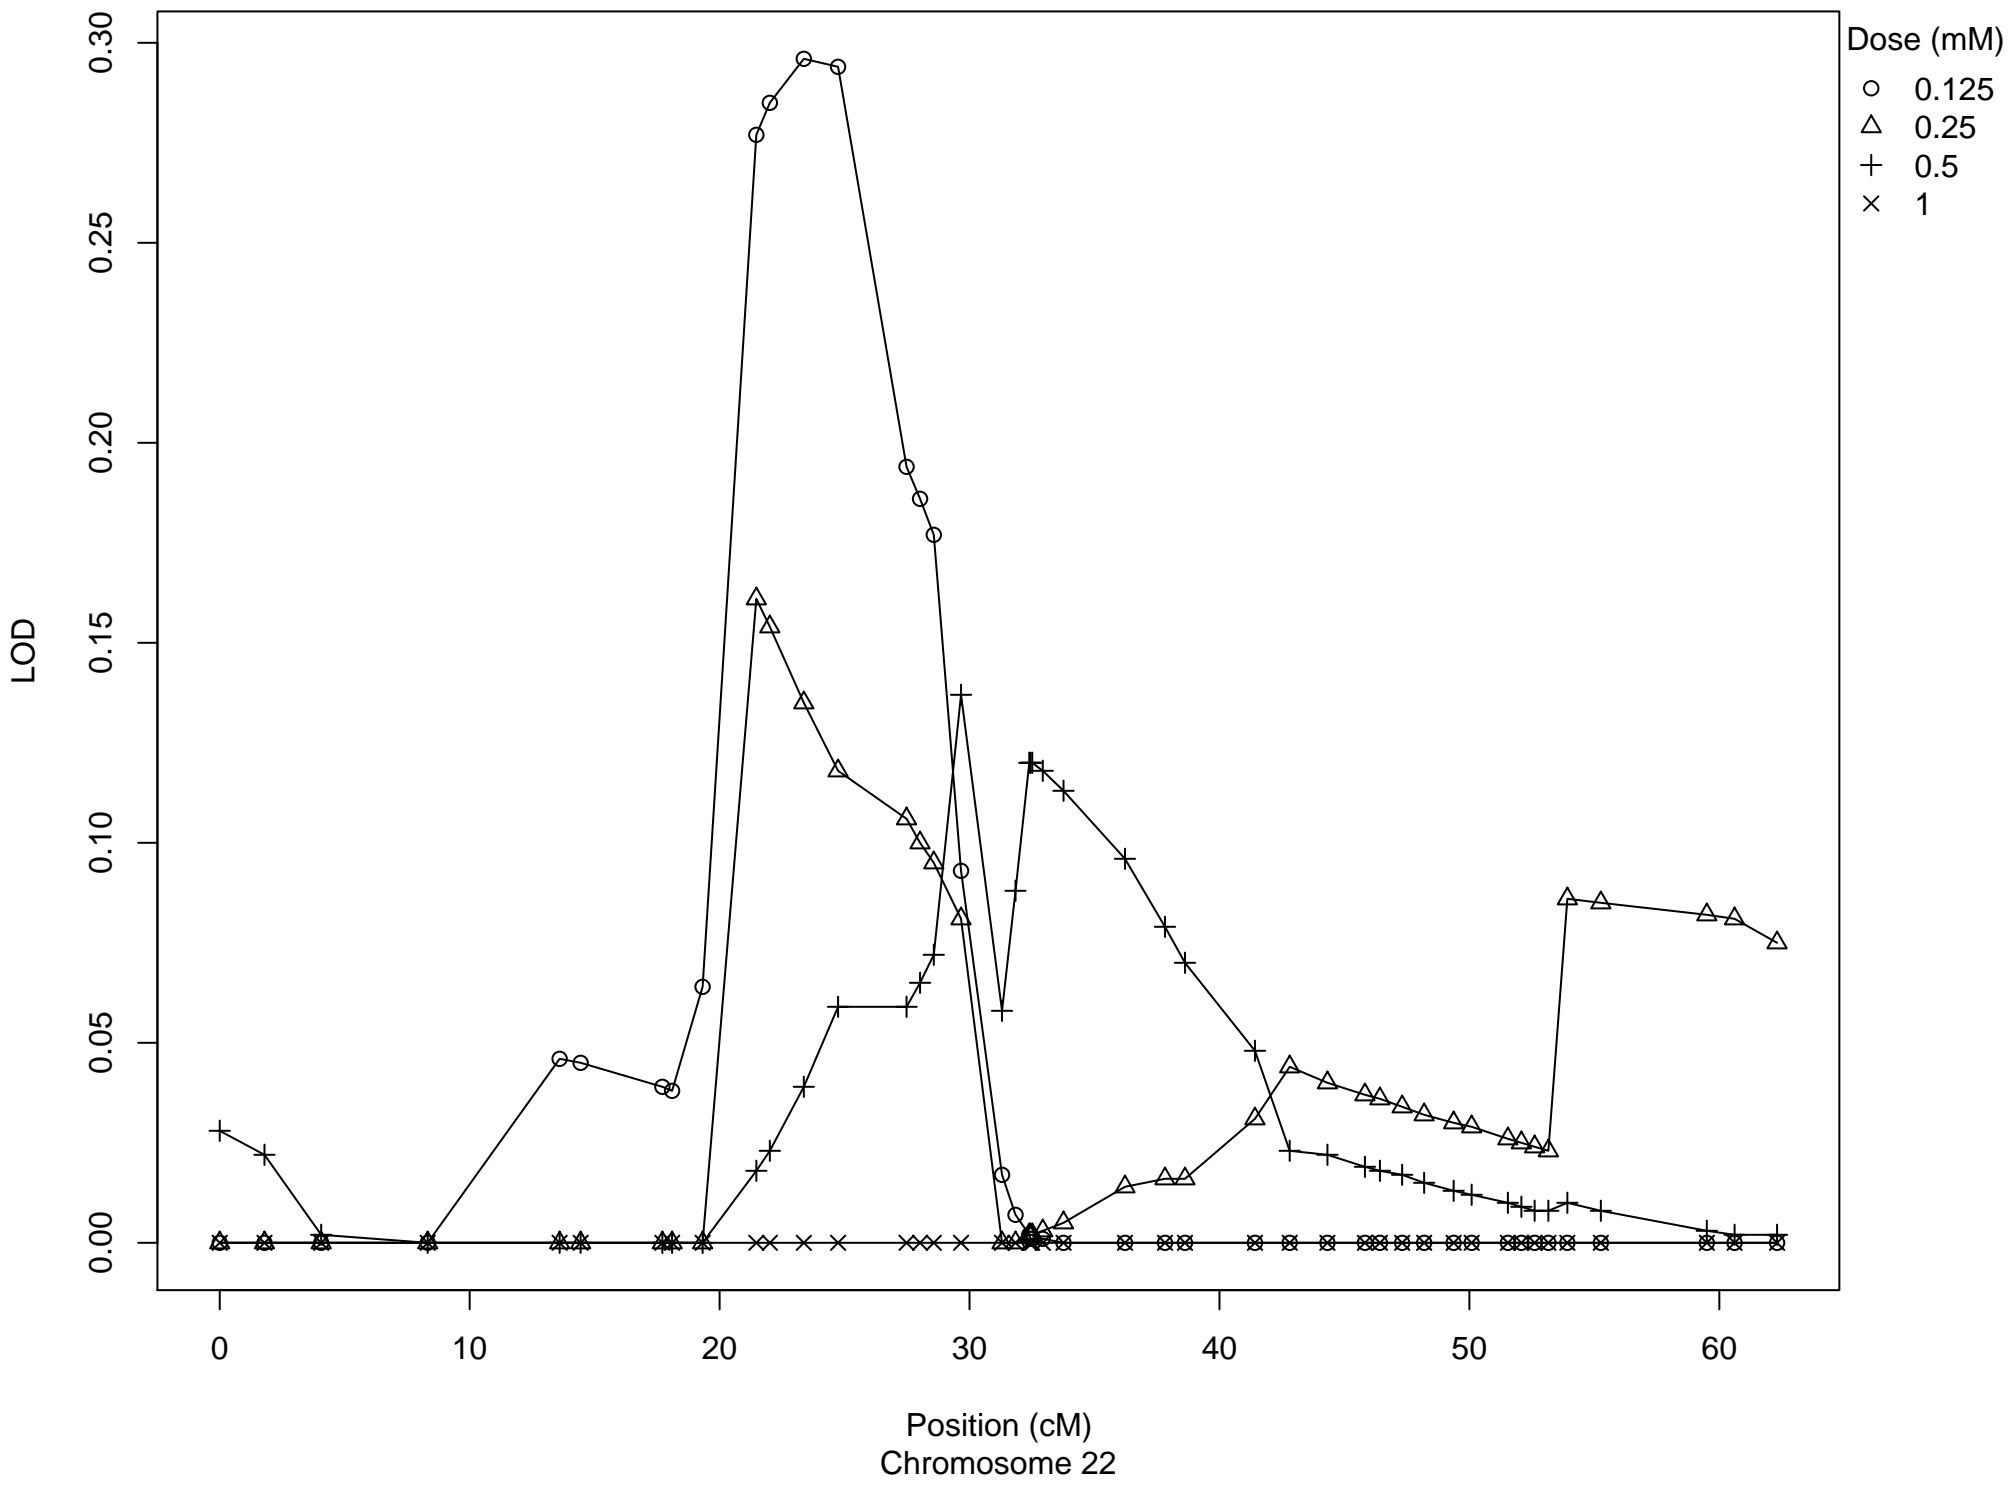



# Teniposide (Teni)

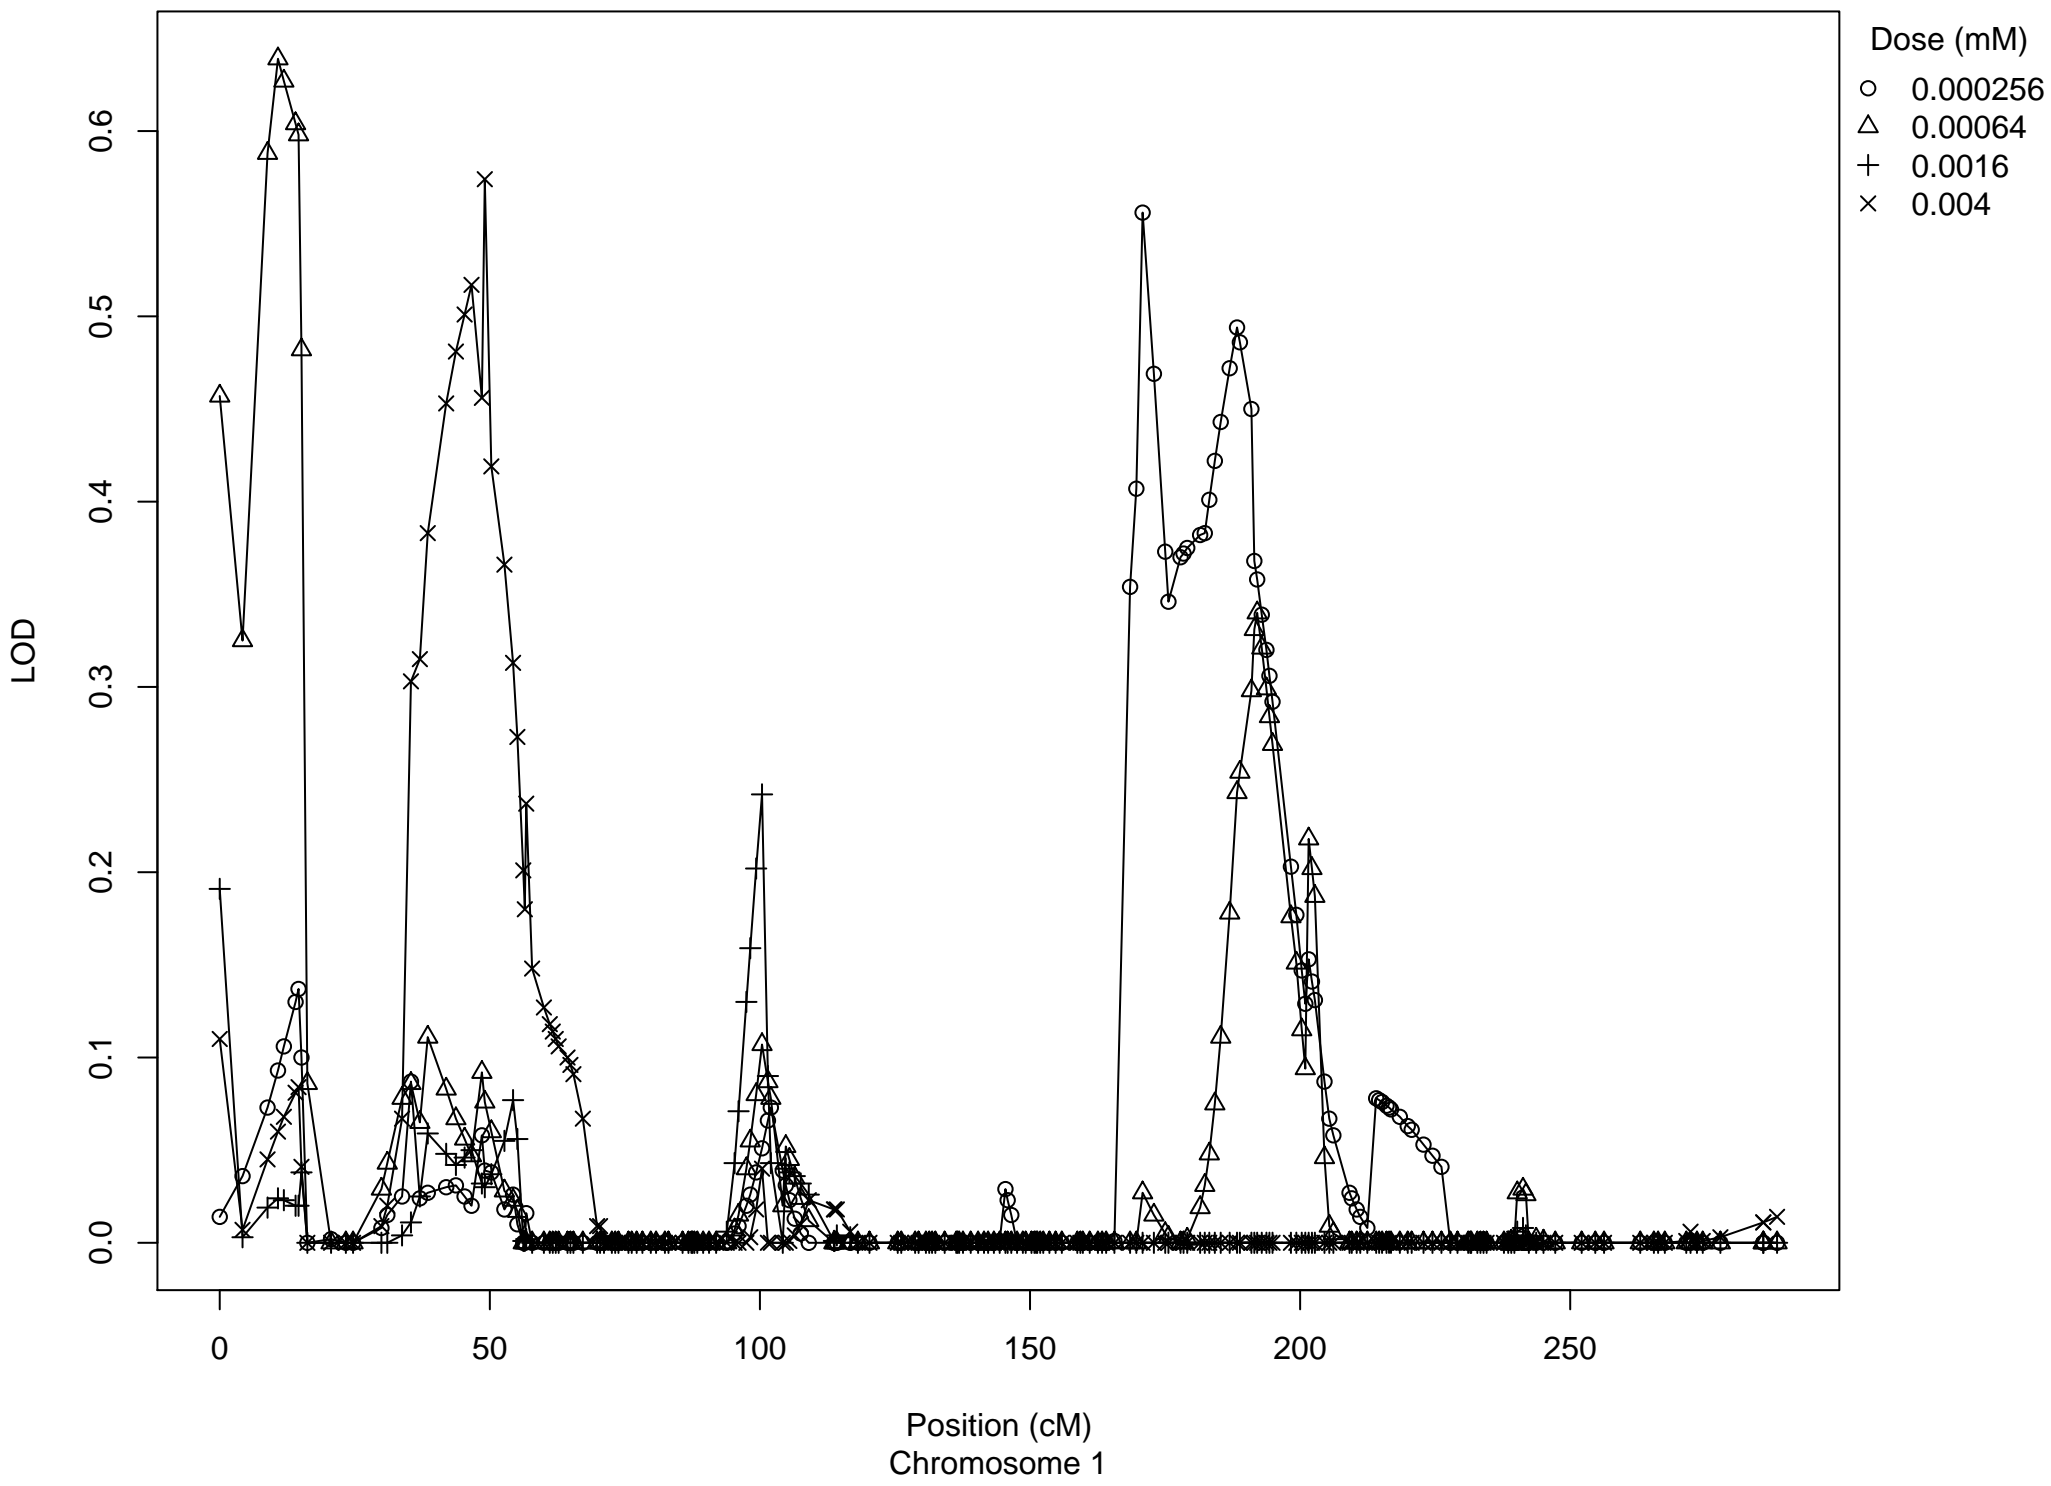

# Teniposide (Teni)

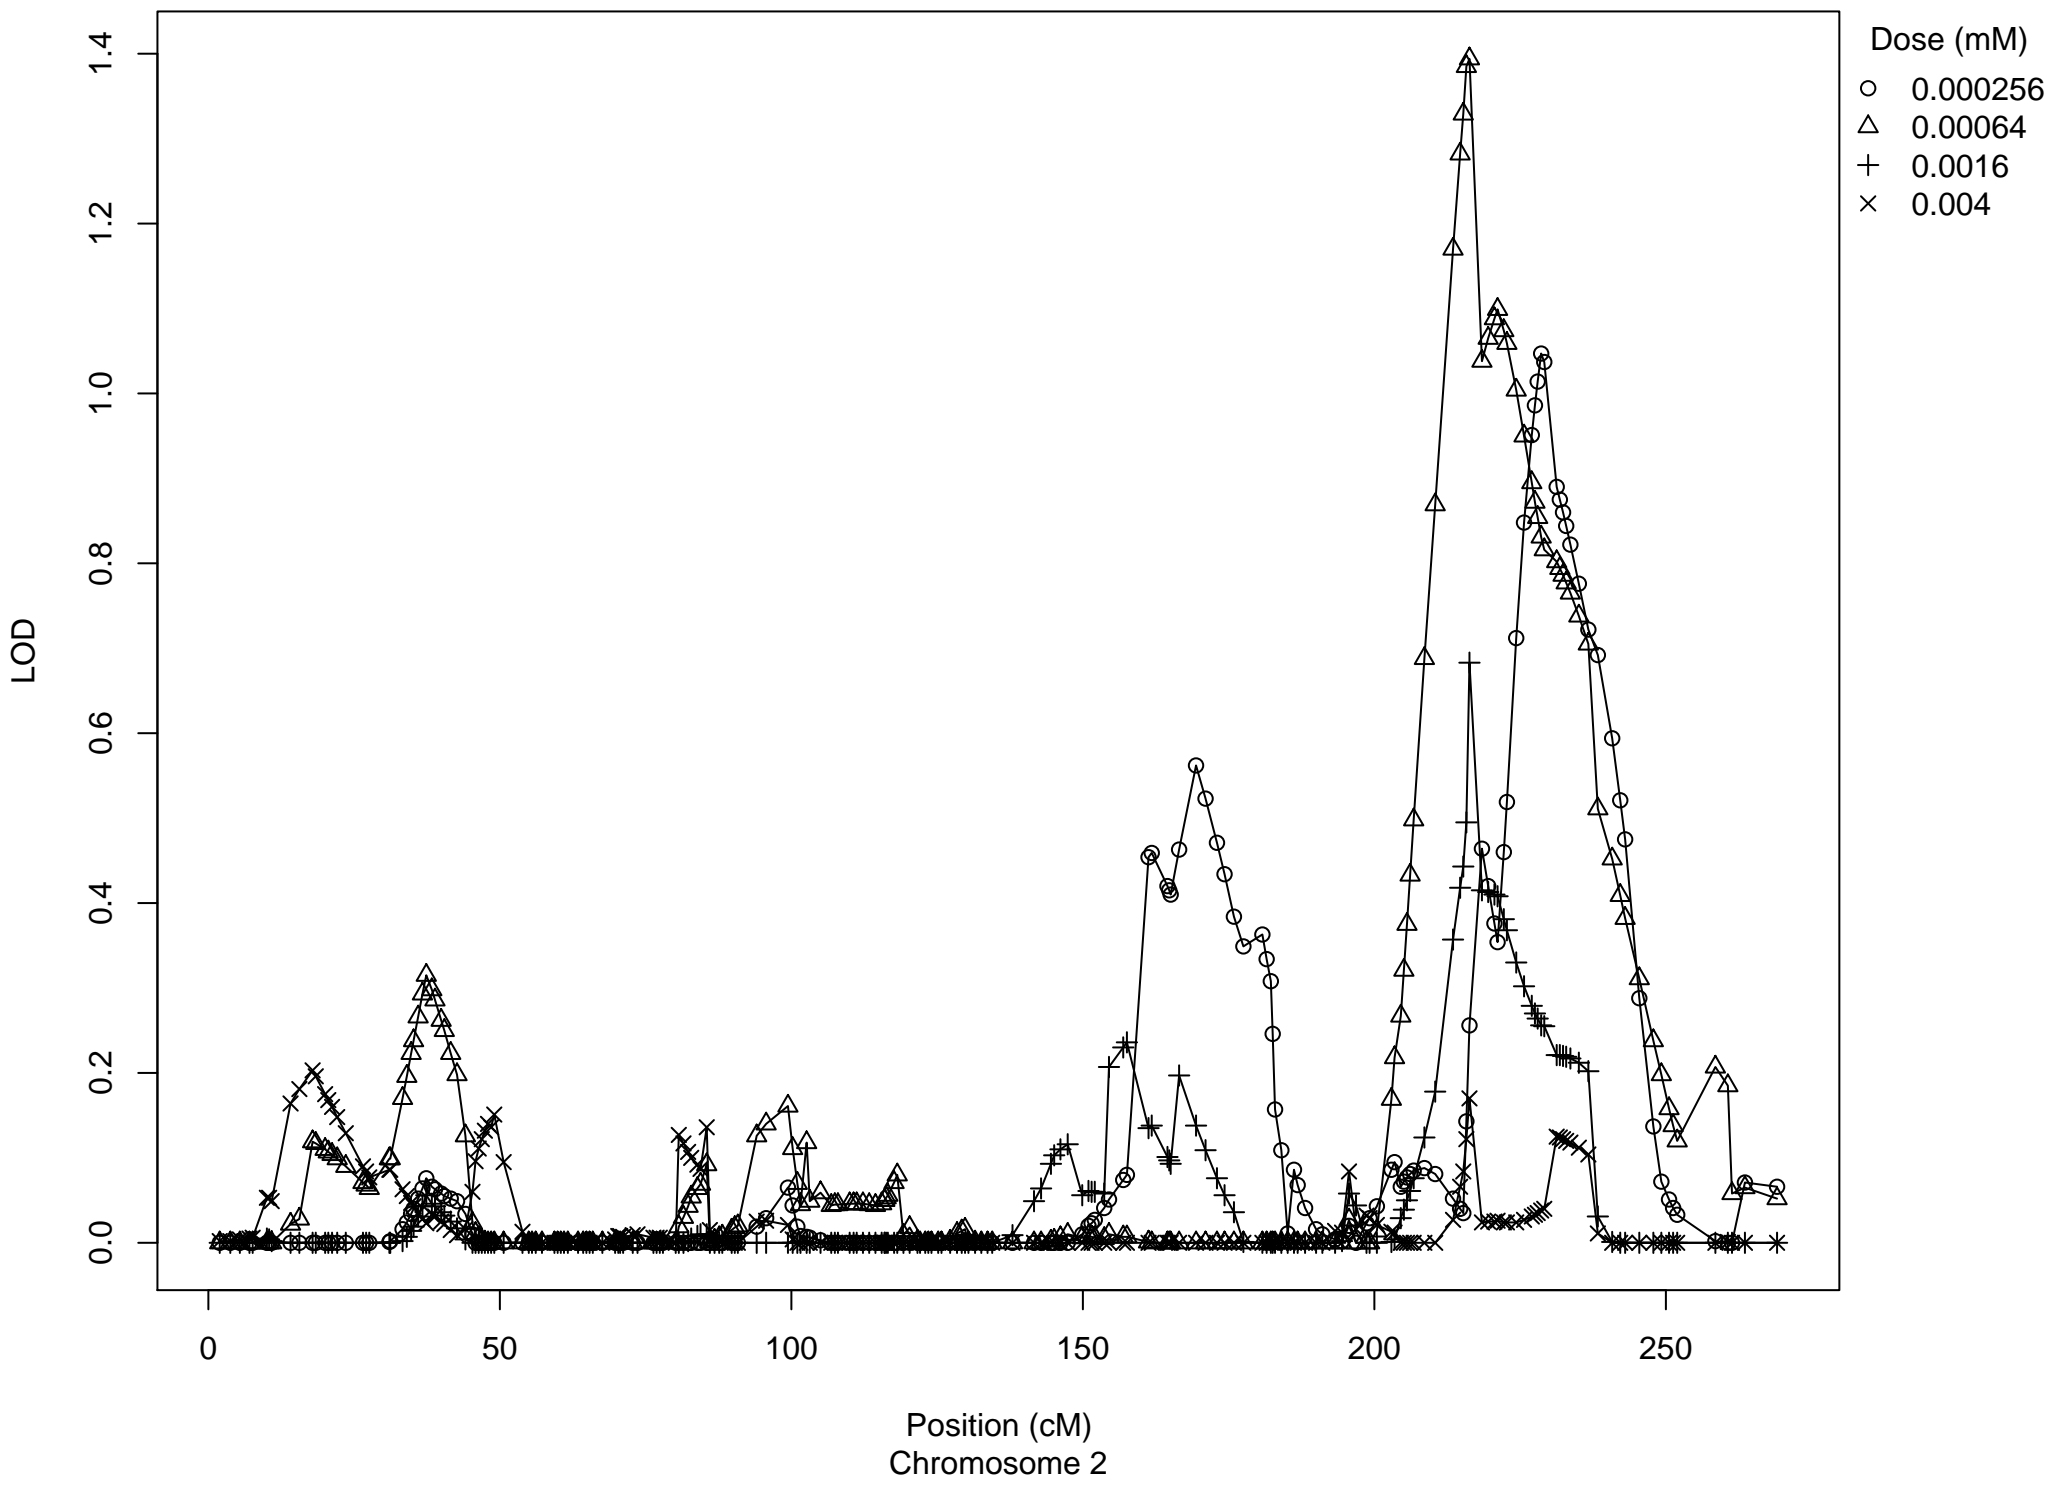

# Teniposide (Teni)

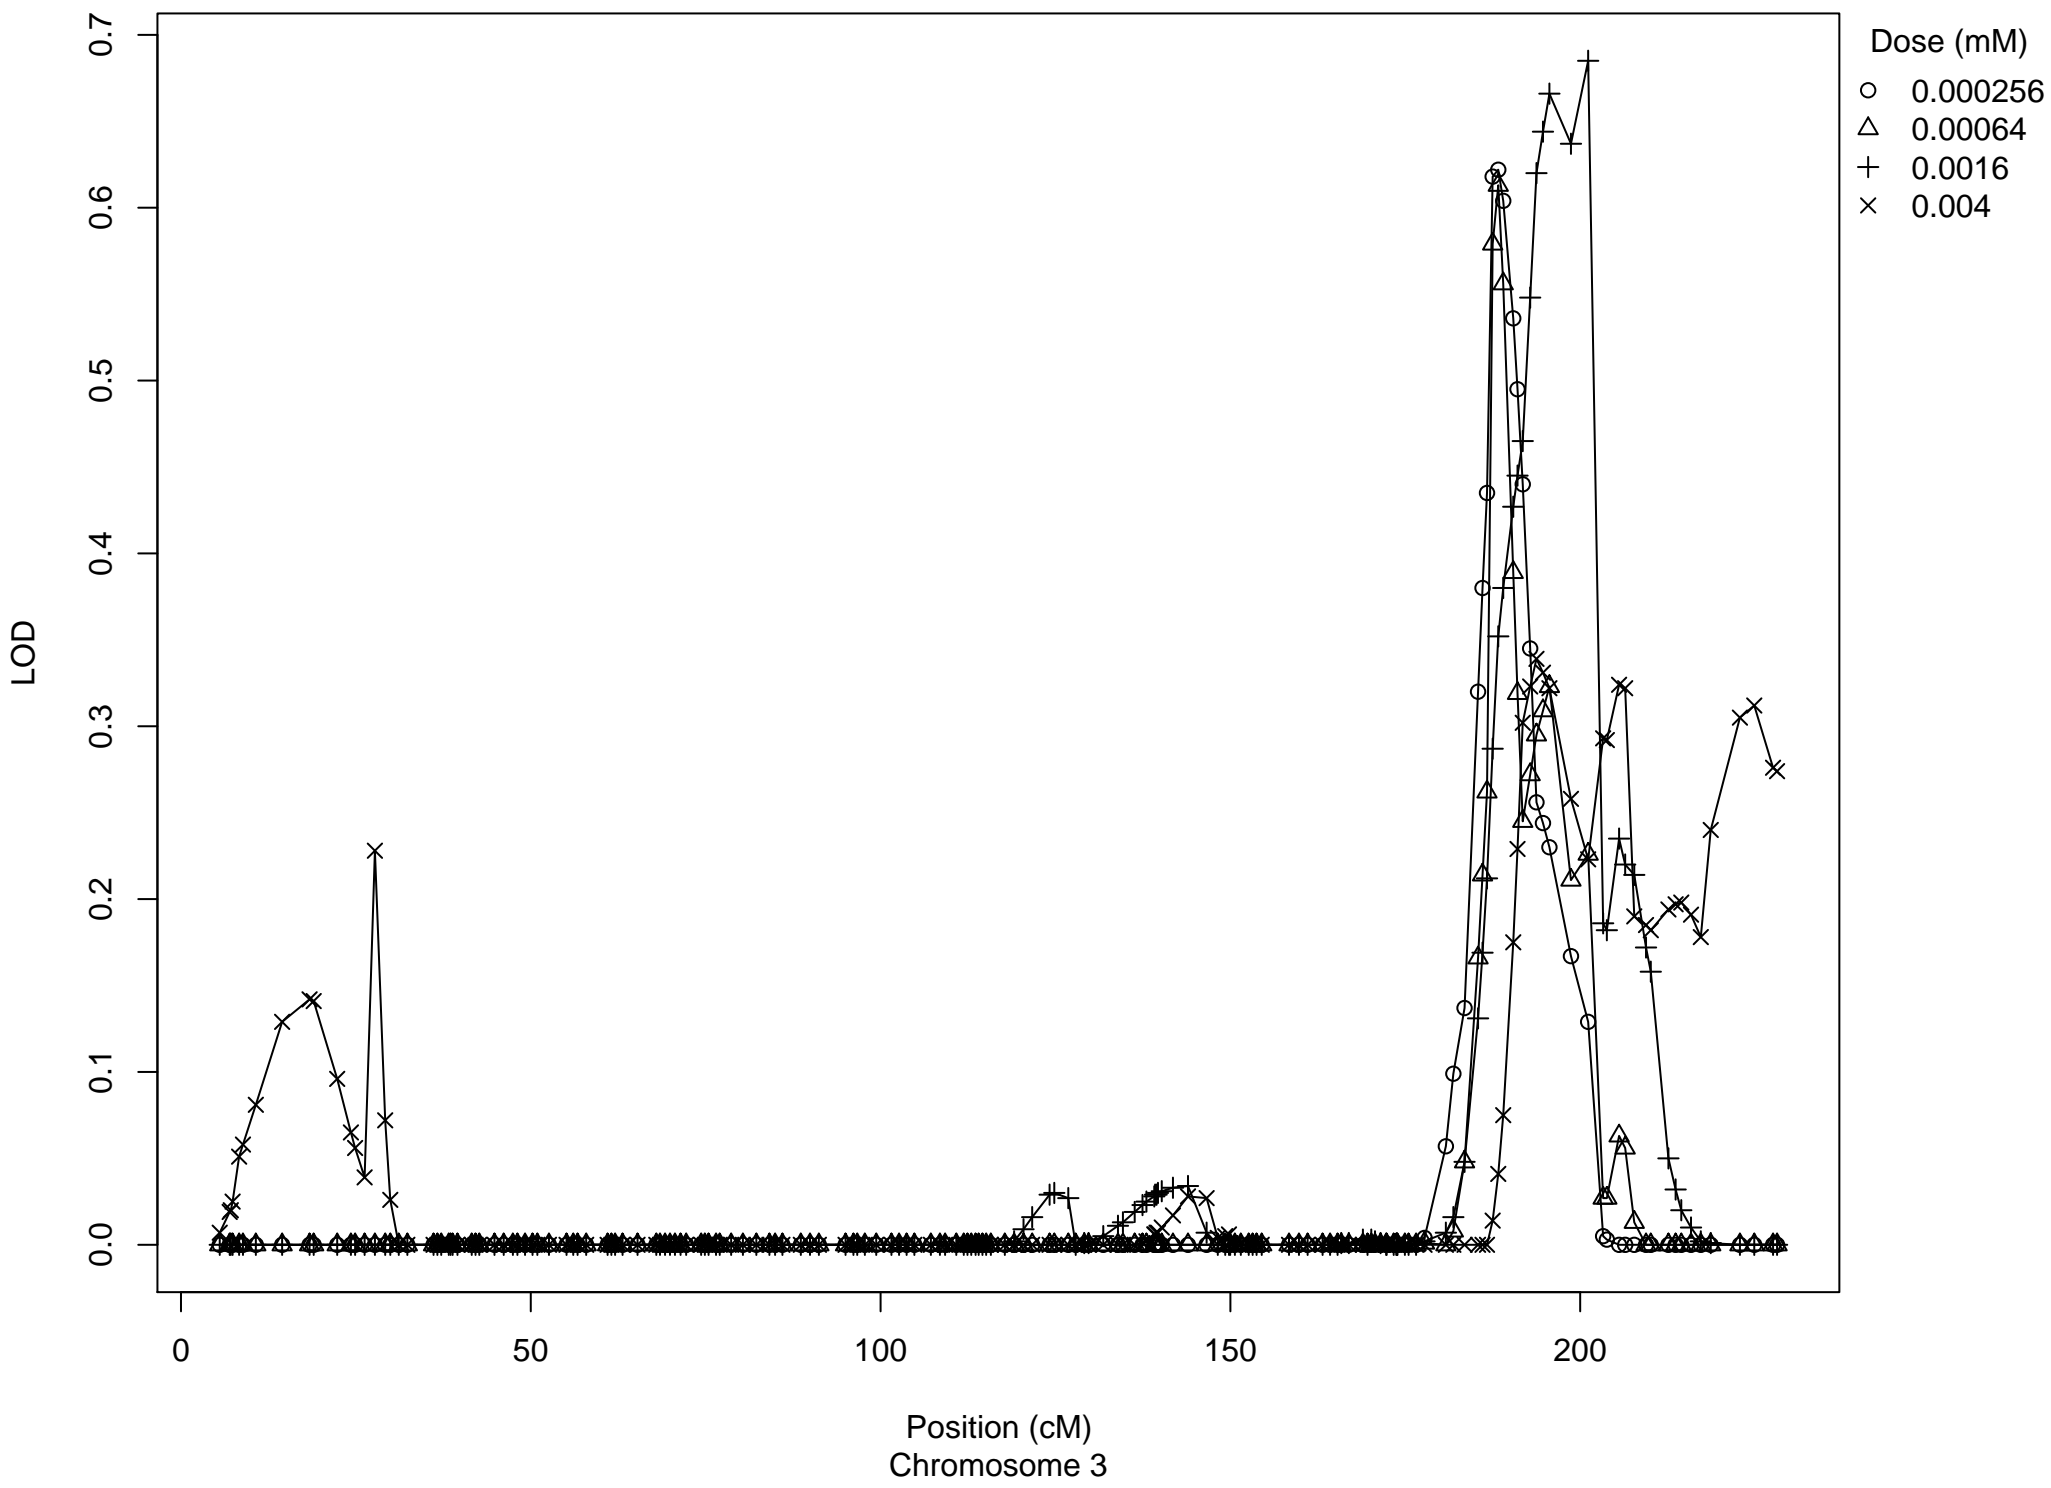

# Teniposide (Teni)

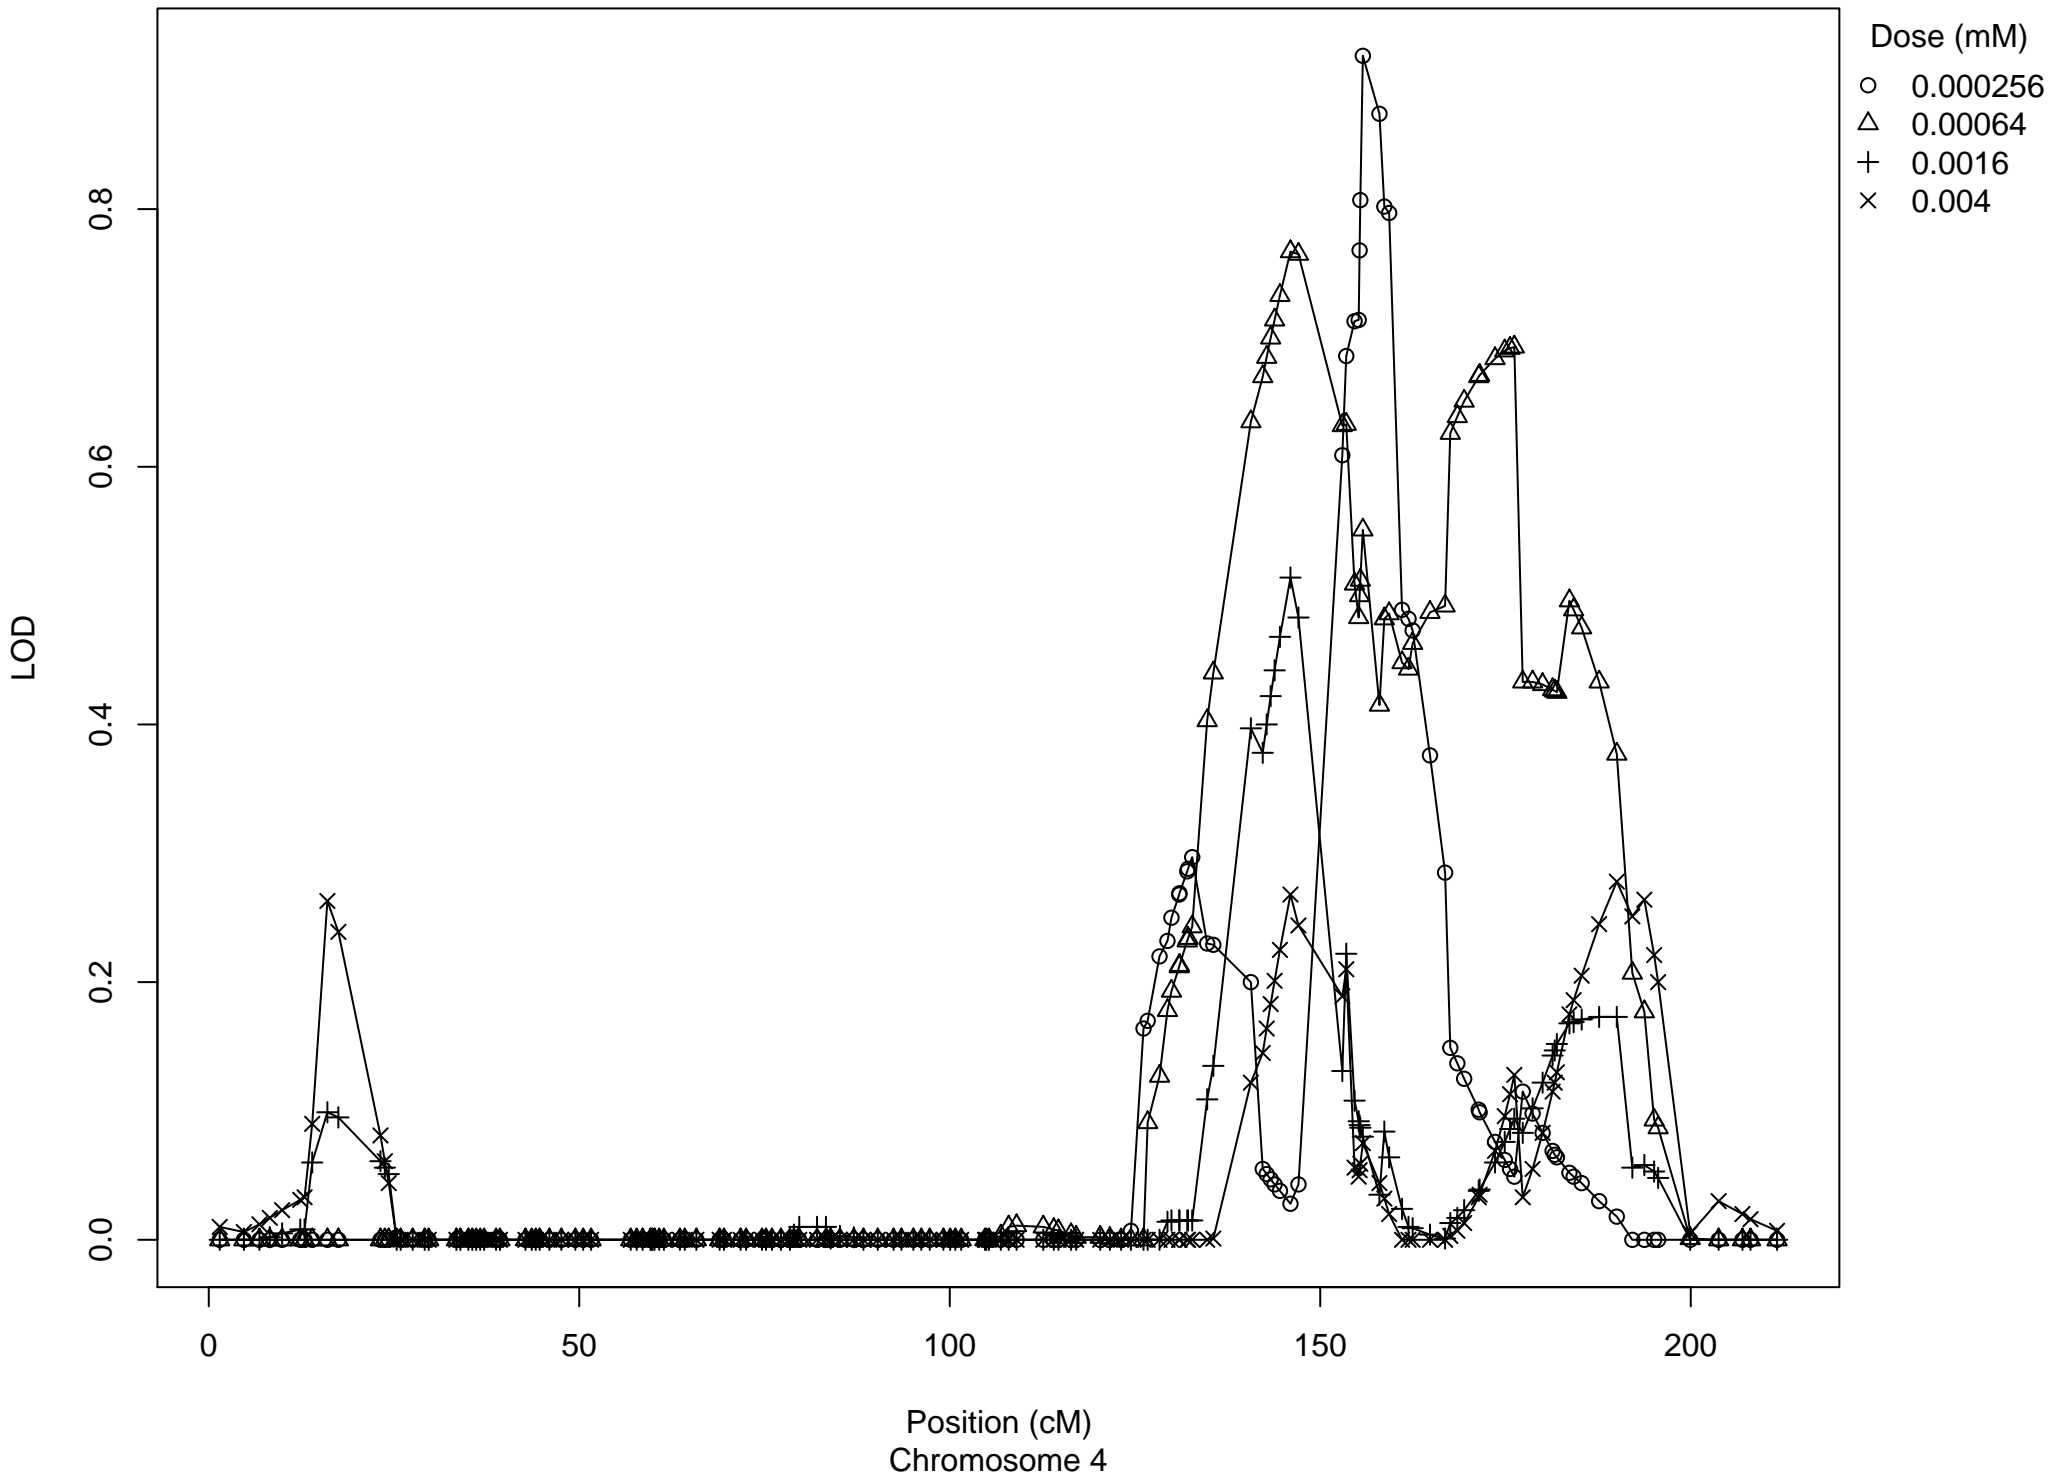

# Teniposide (Teni)

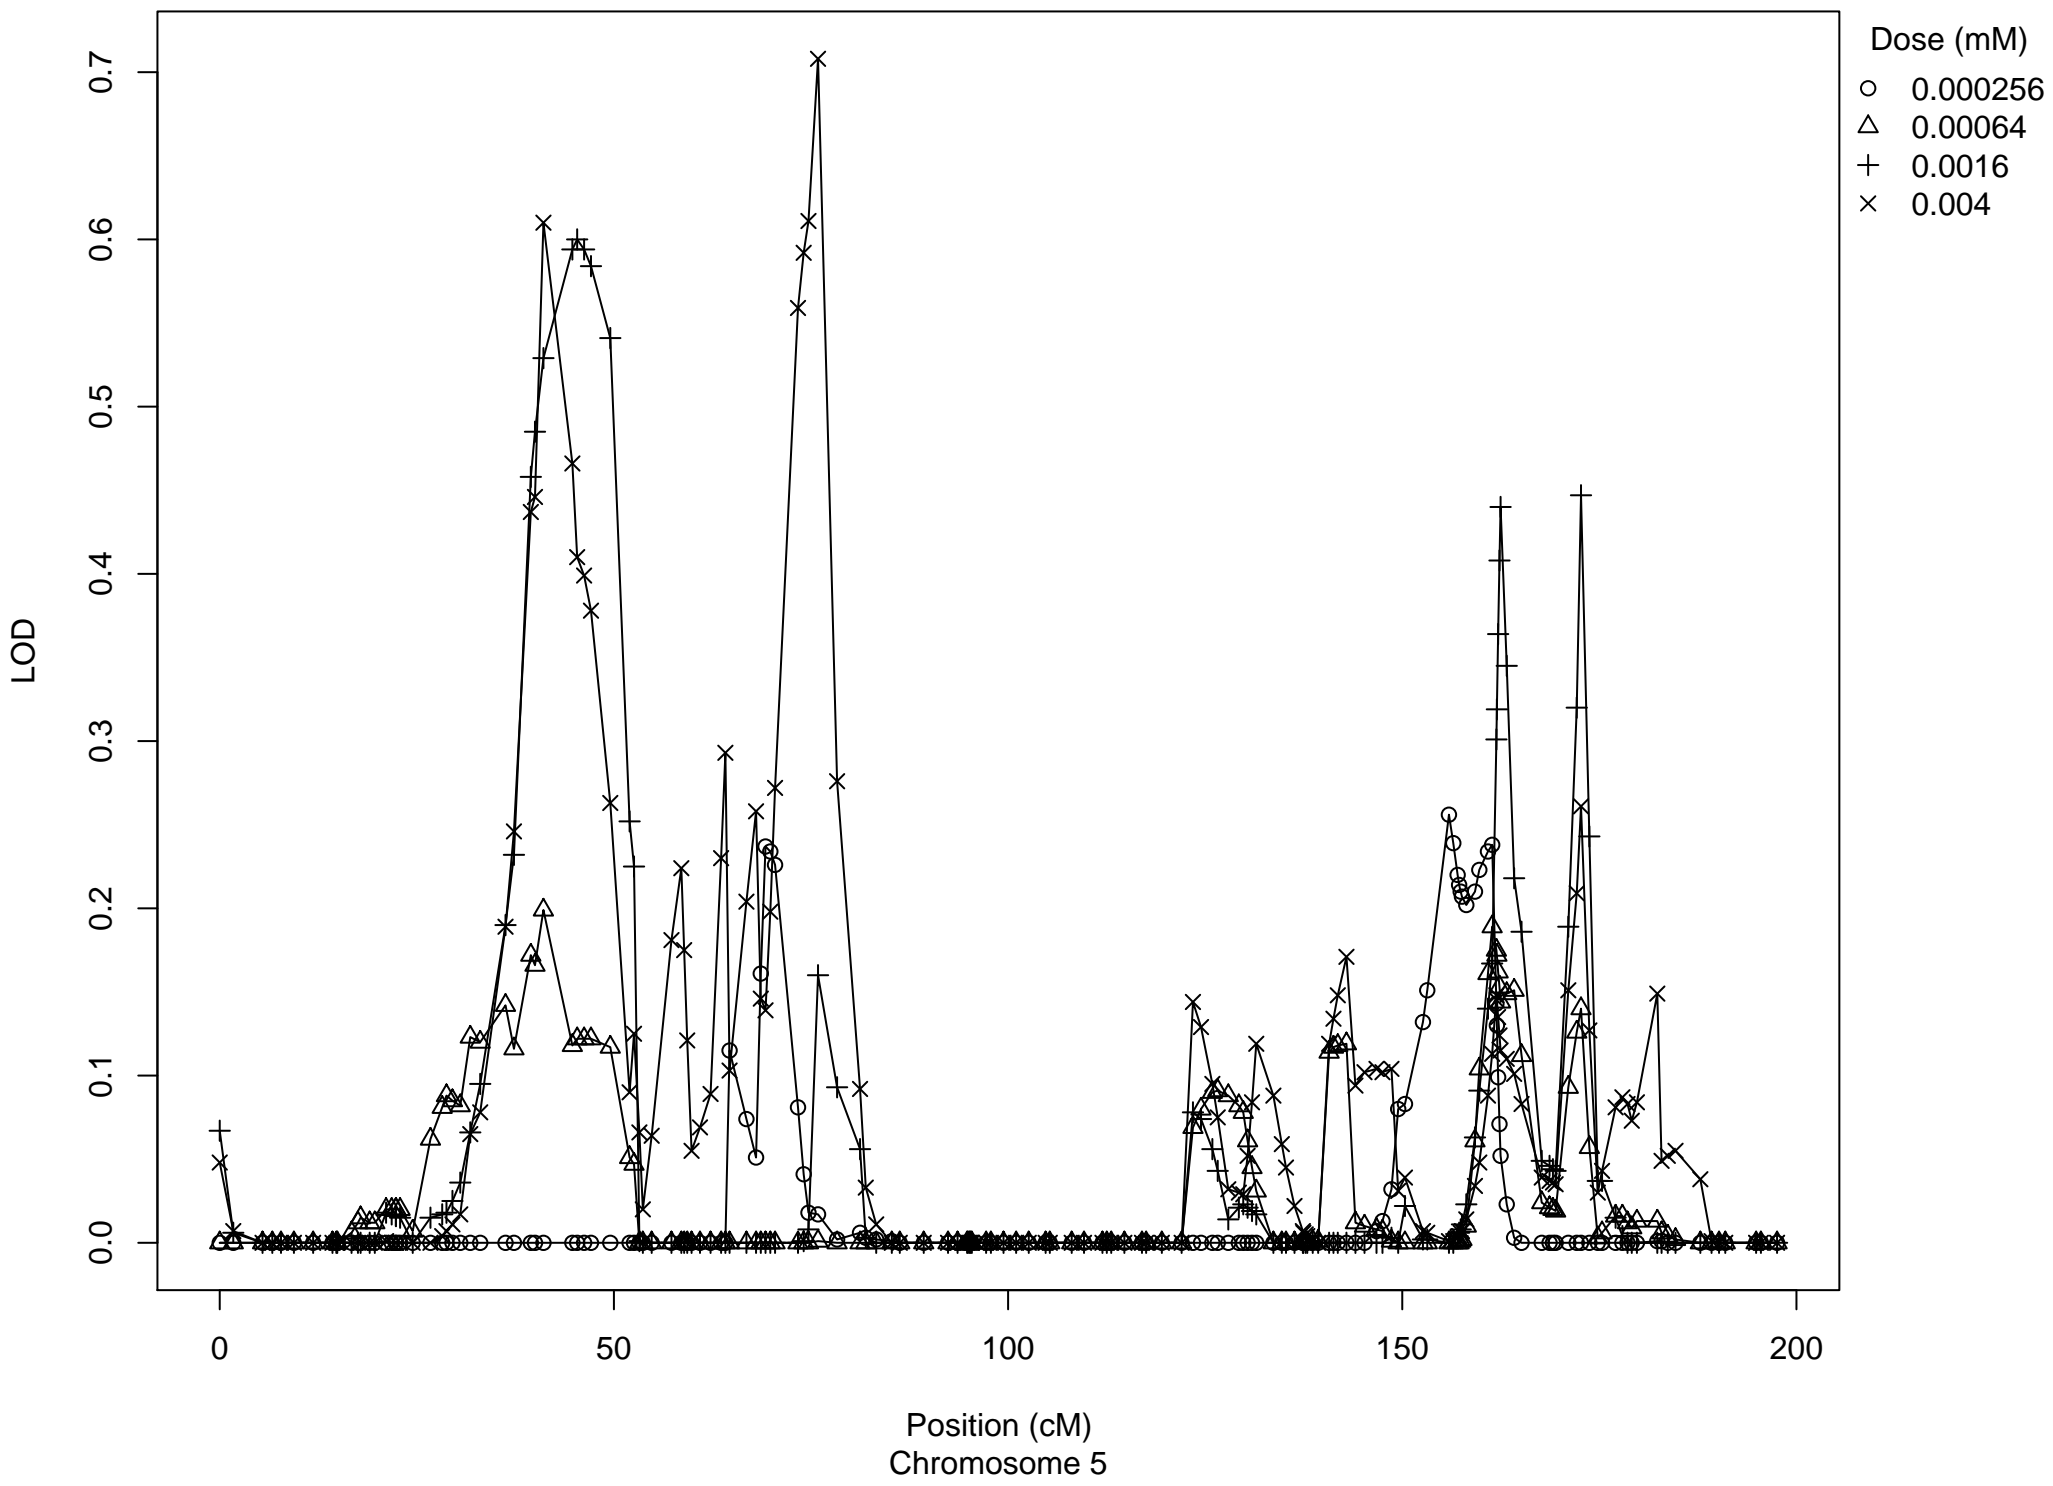

# Teniposide (Teni)

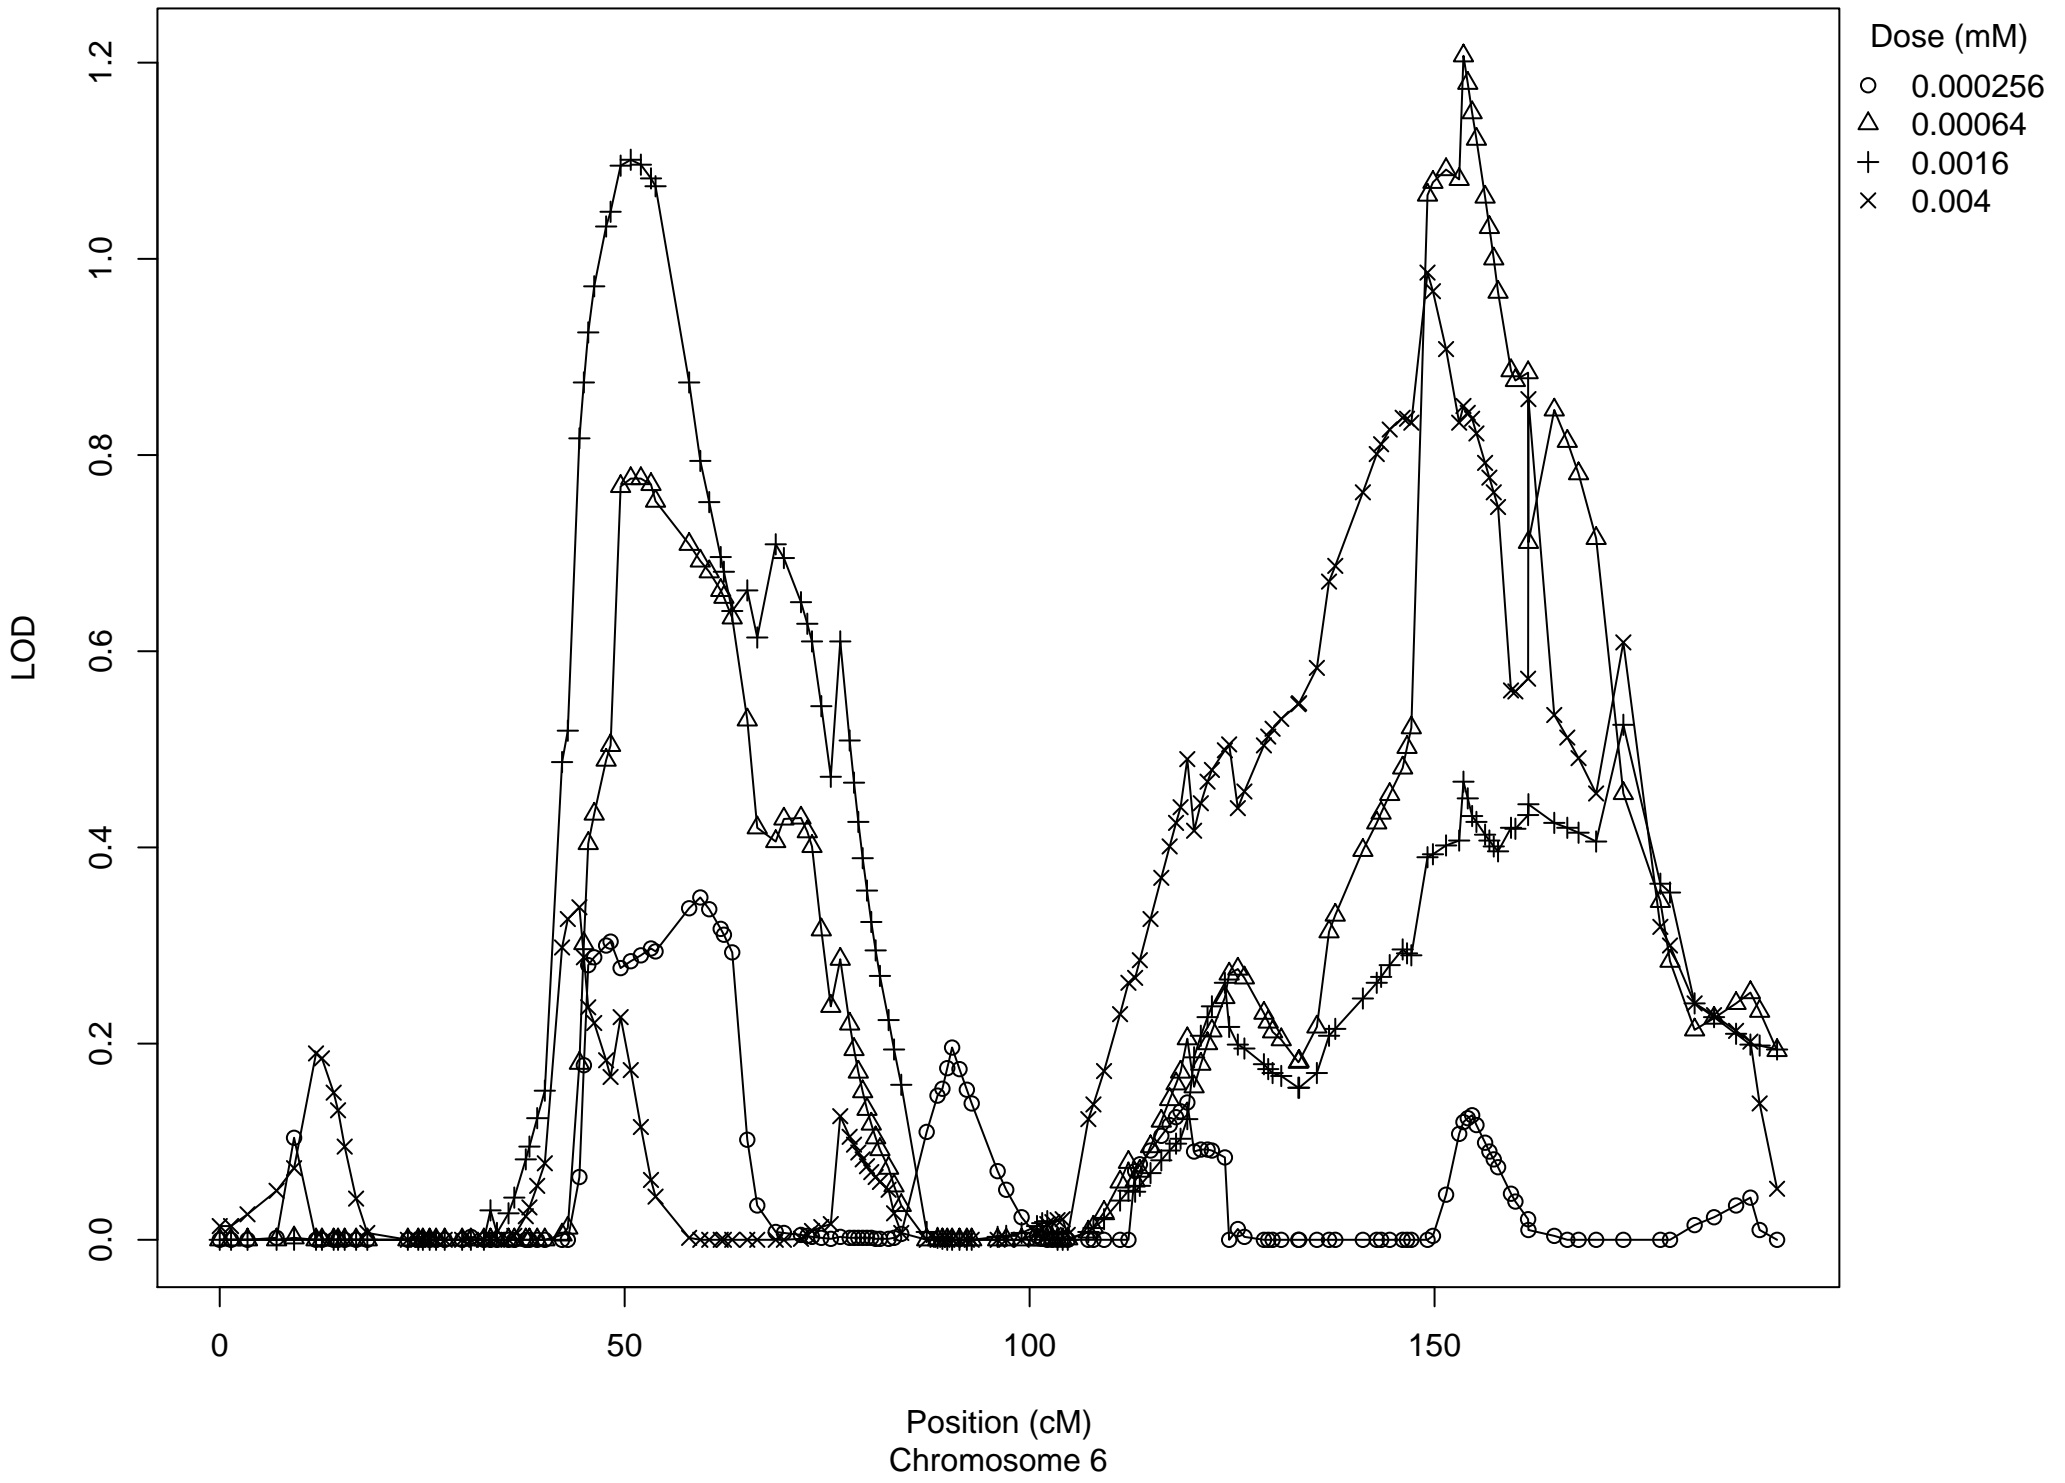

# Teniposide (Teni)

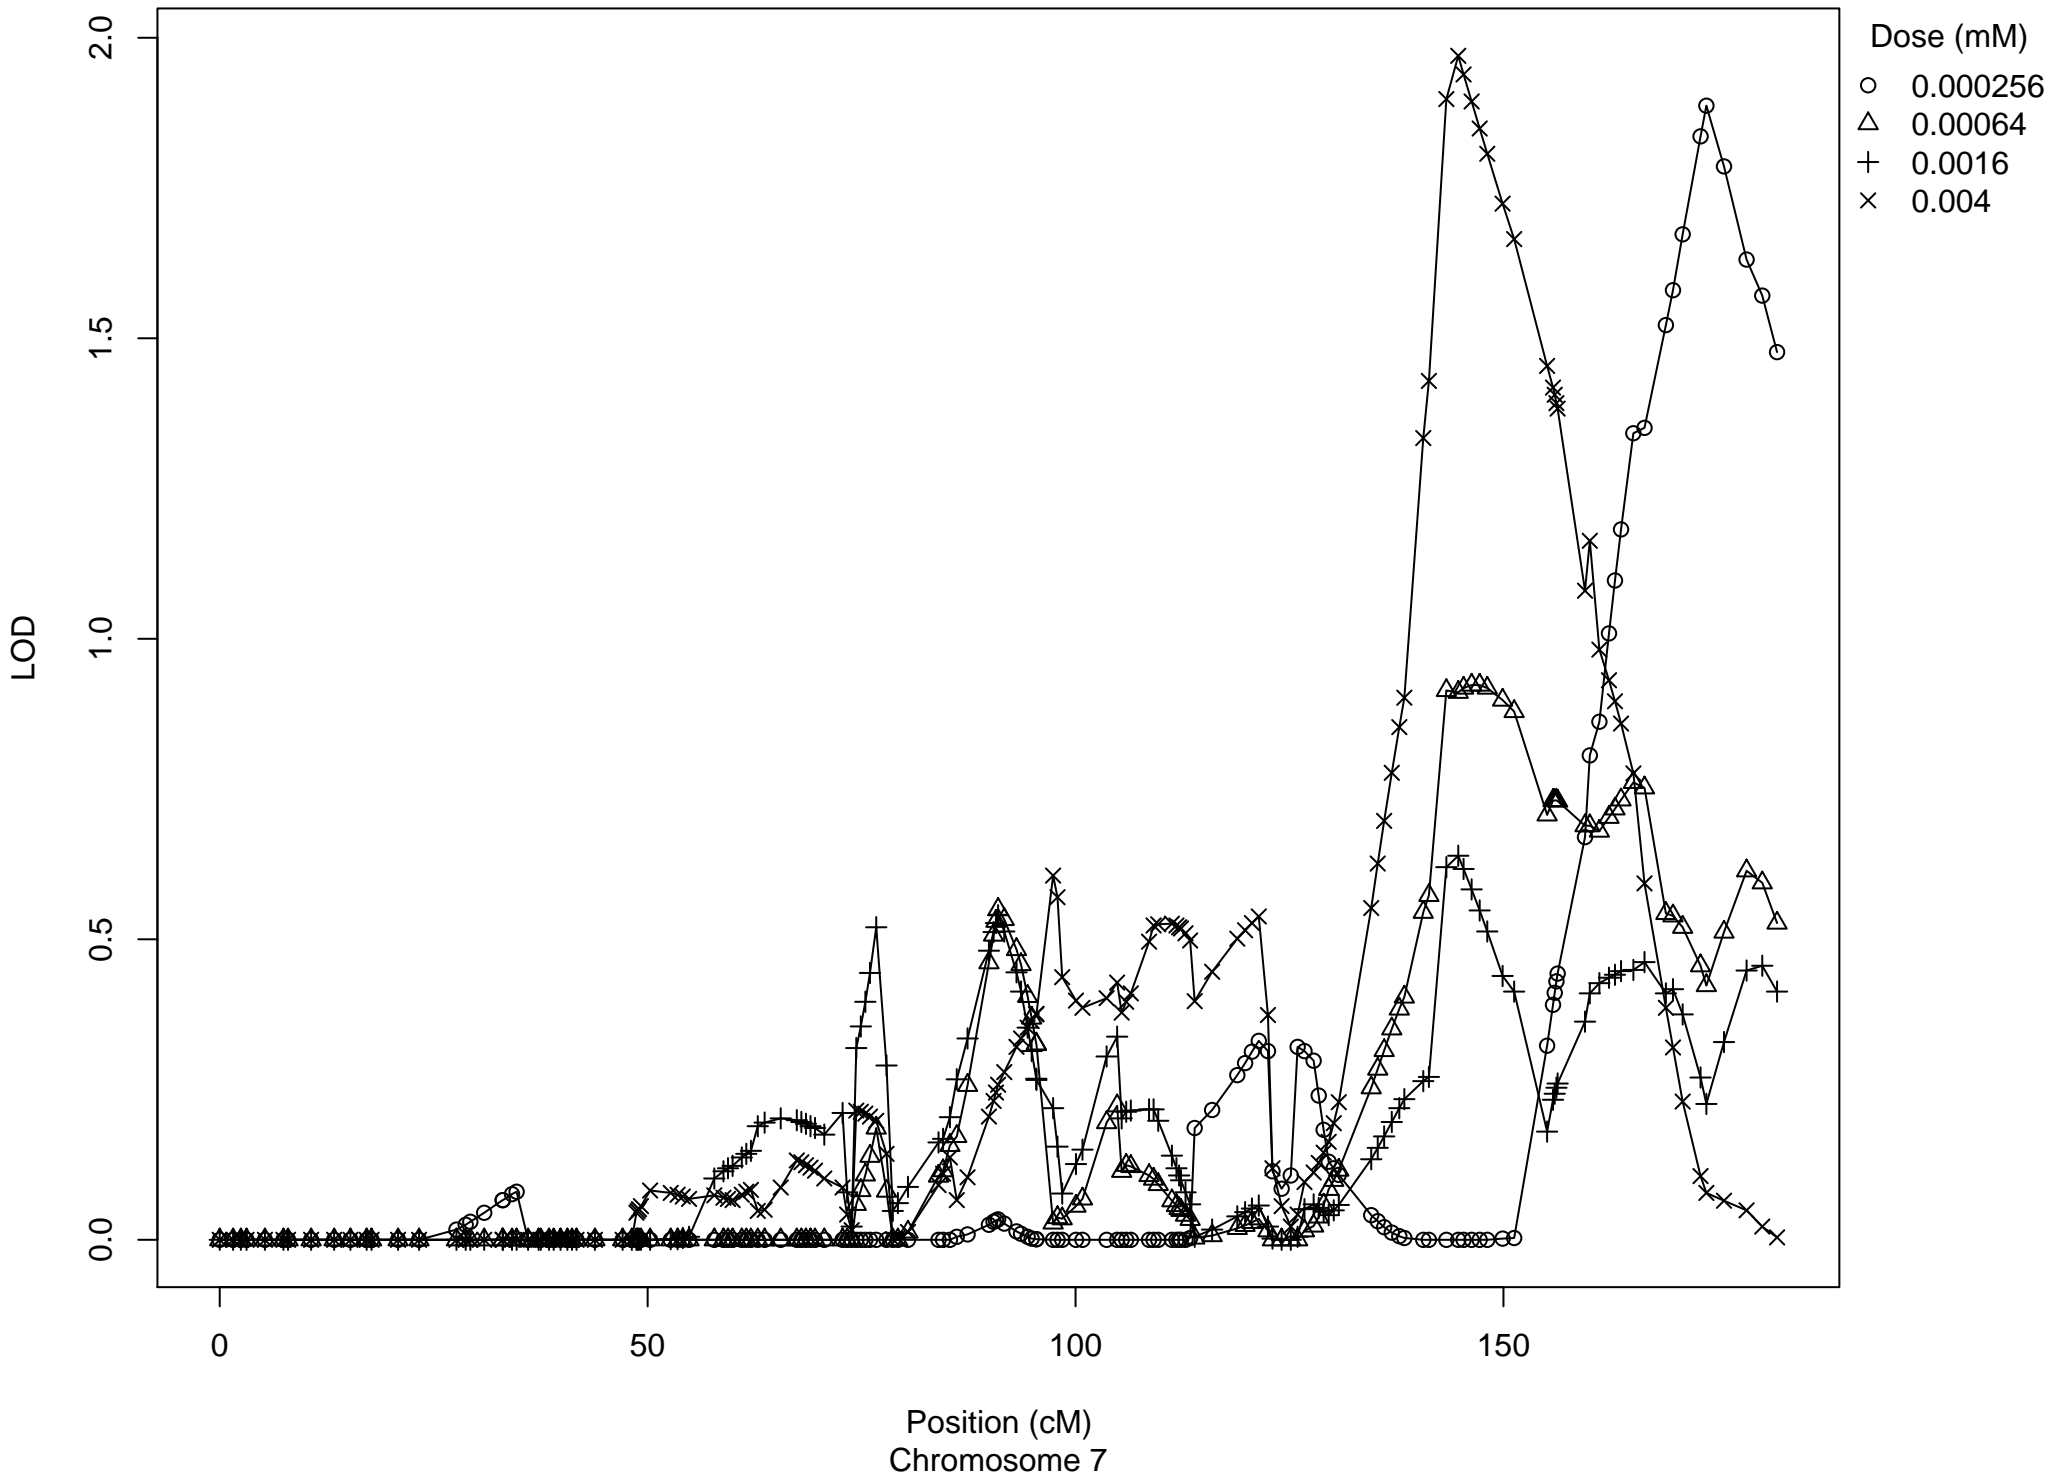

# Teniposide (Teni)

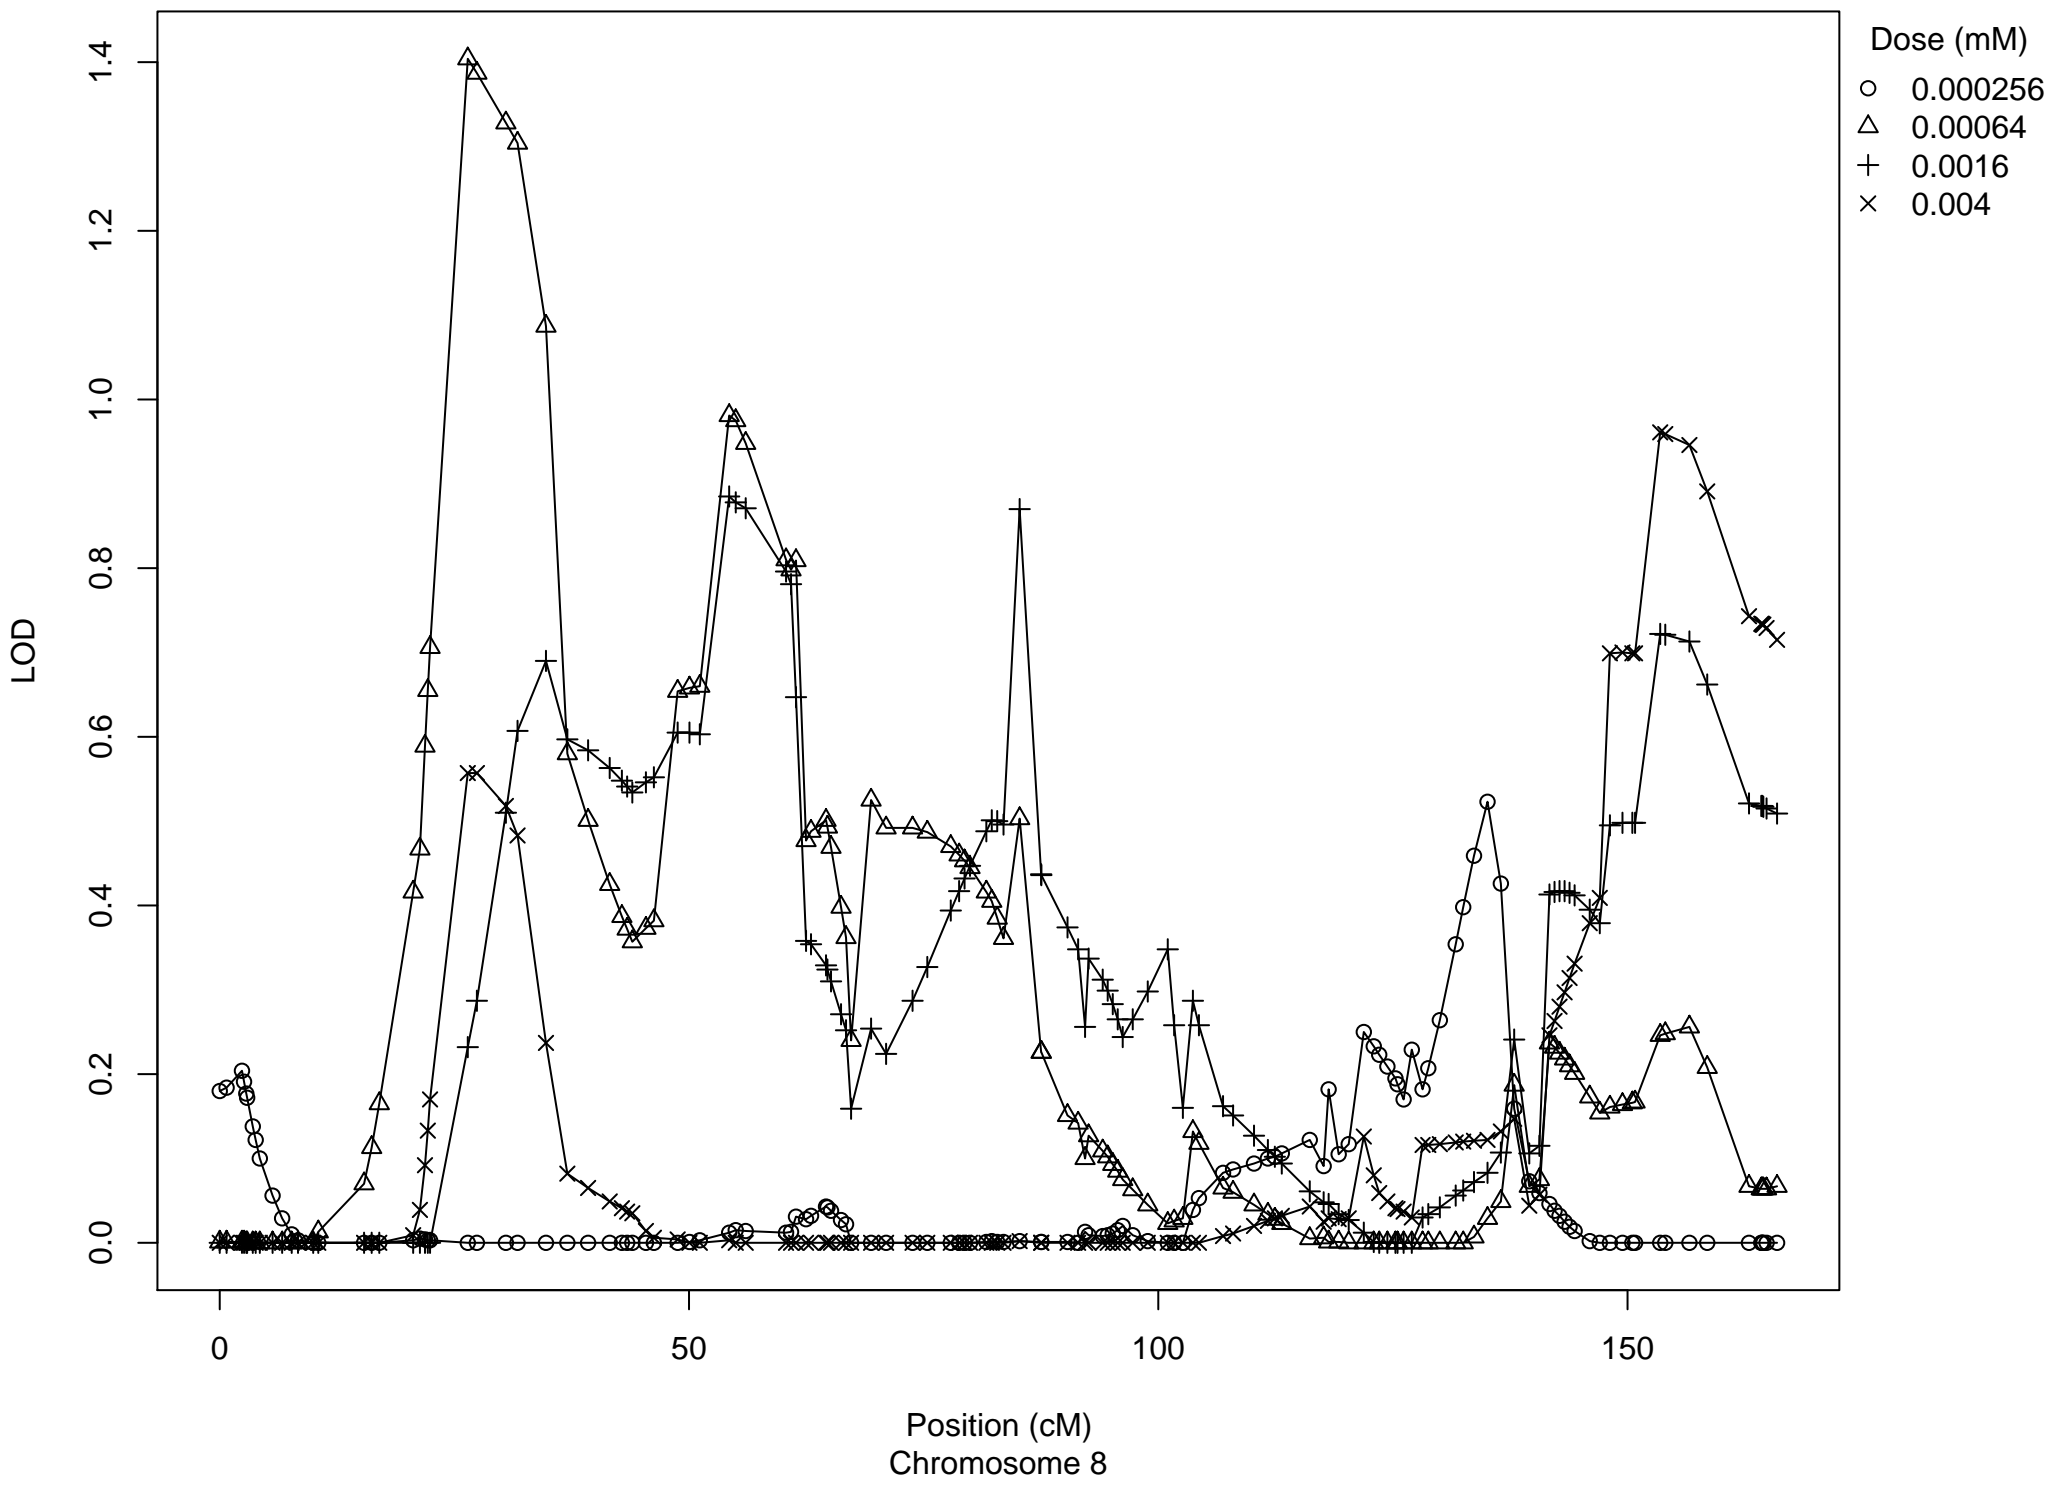



# Teniposide (Teni)

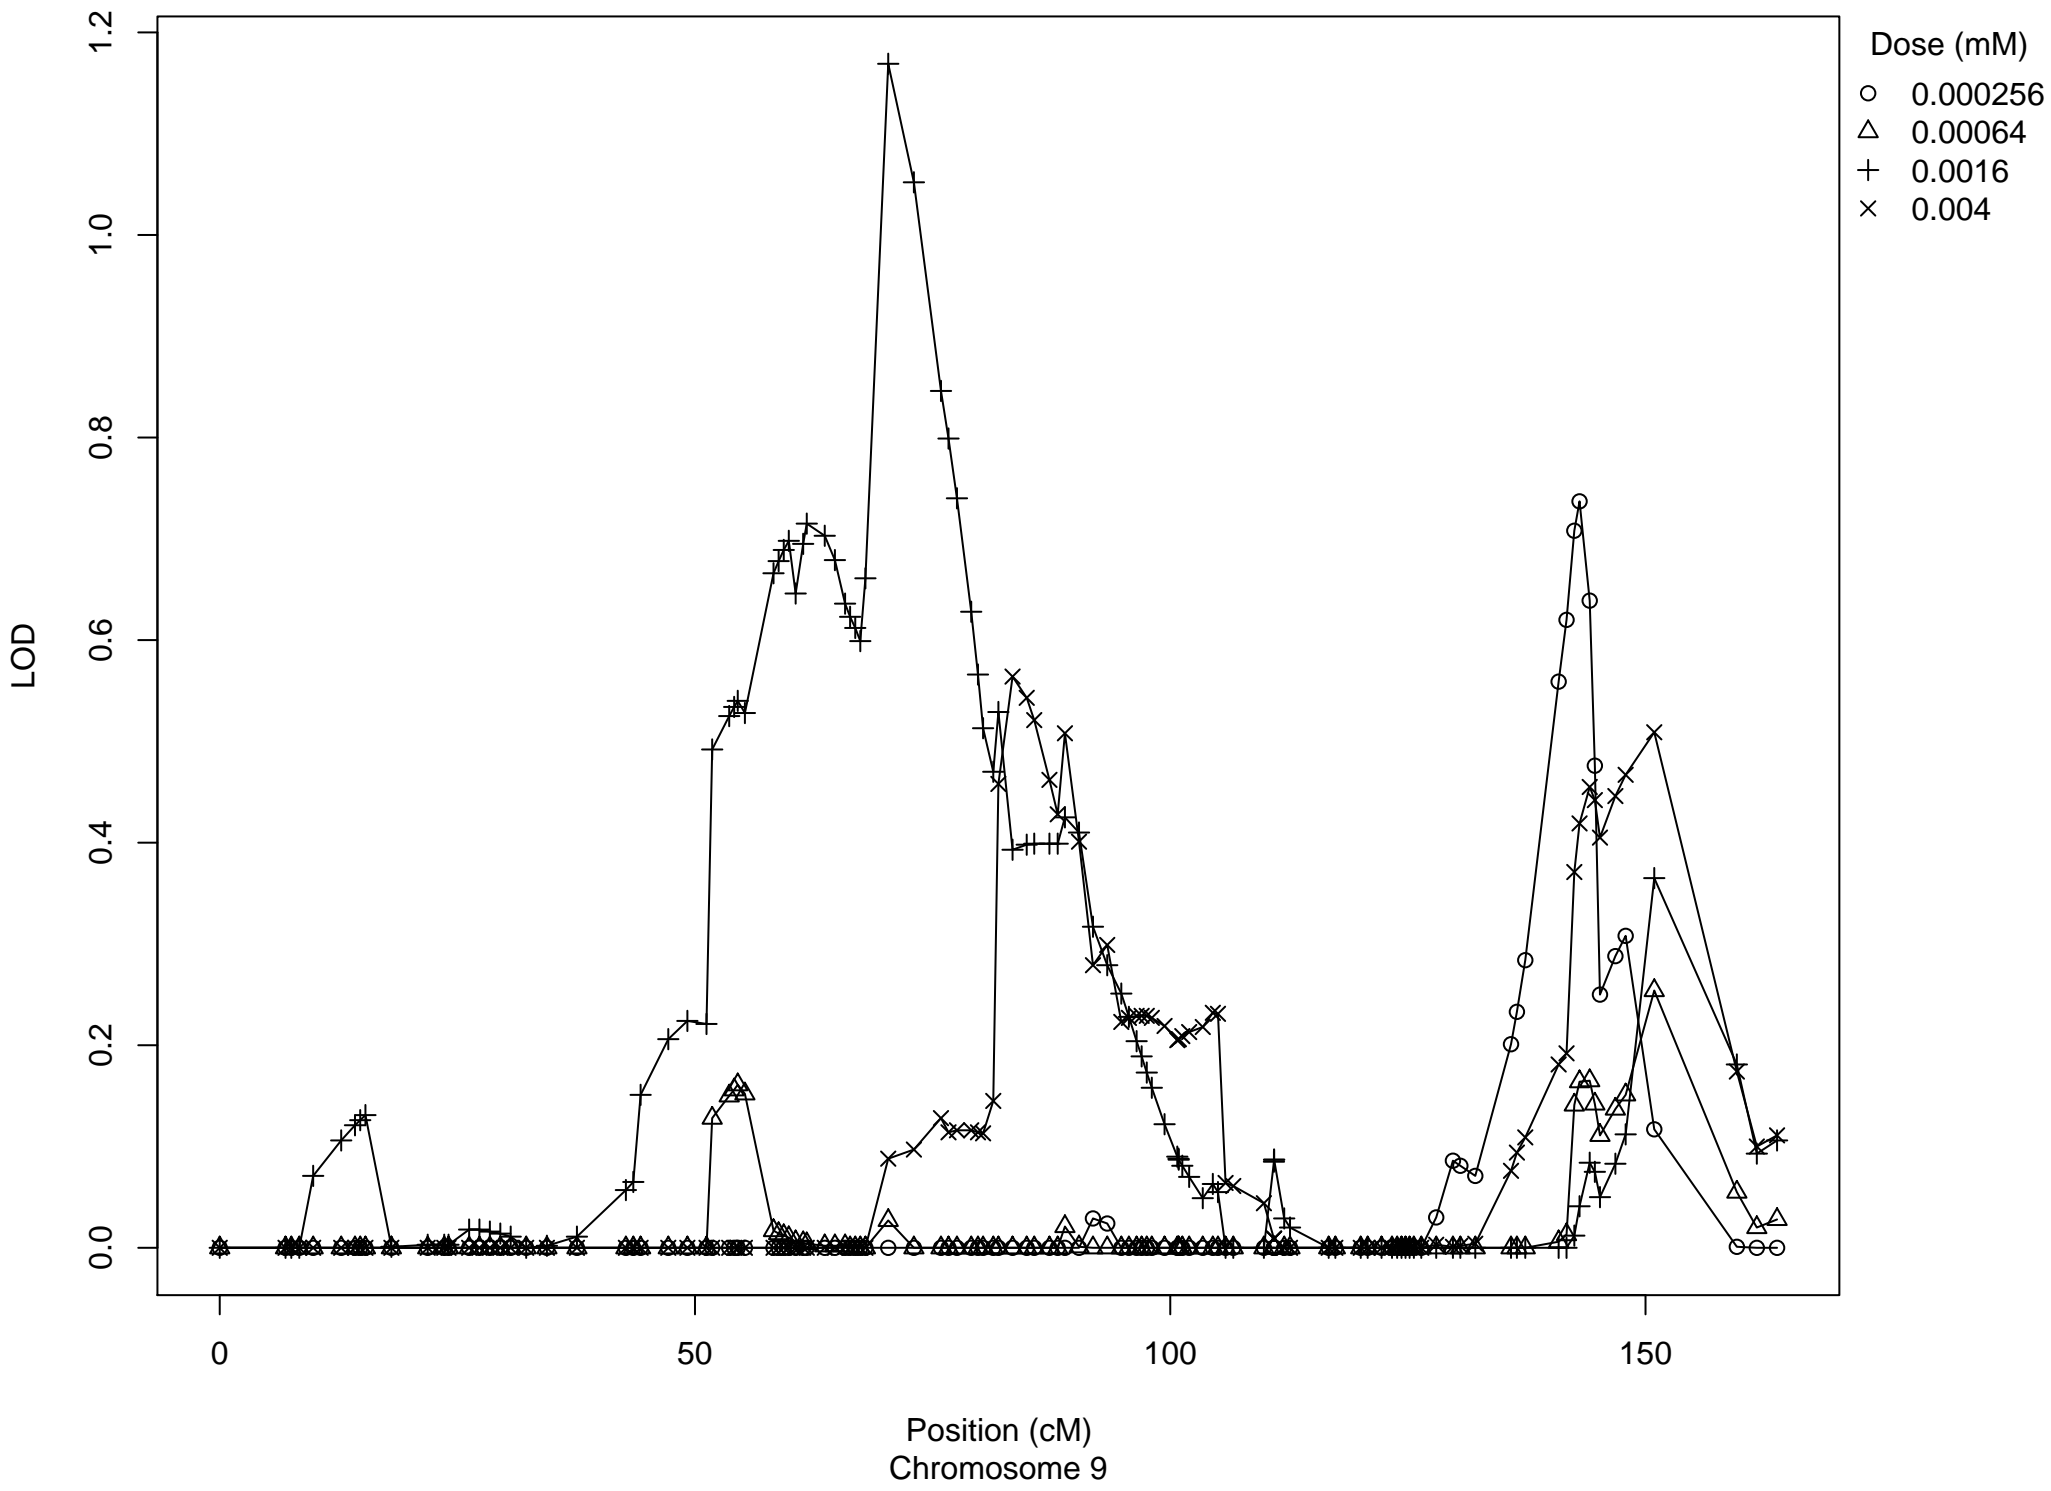

# Teniposide (Teni)

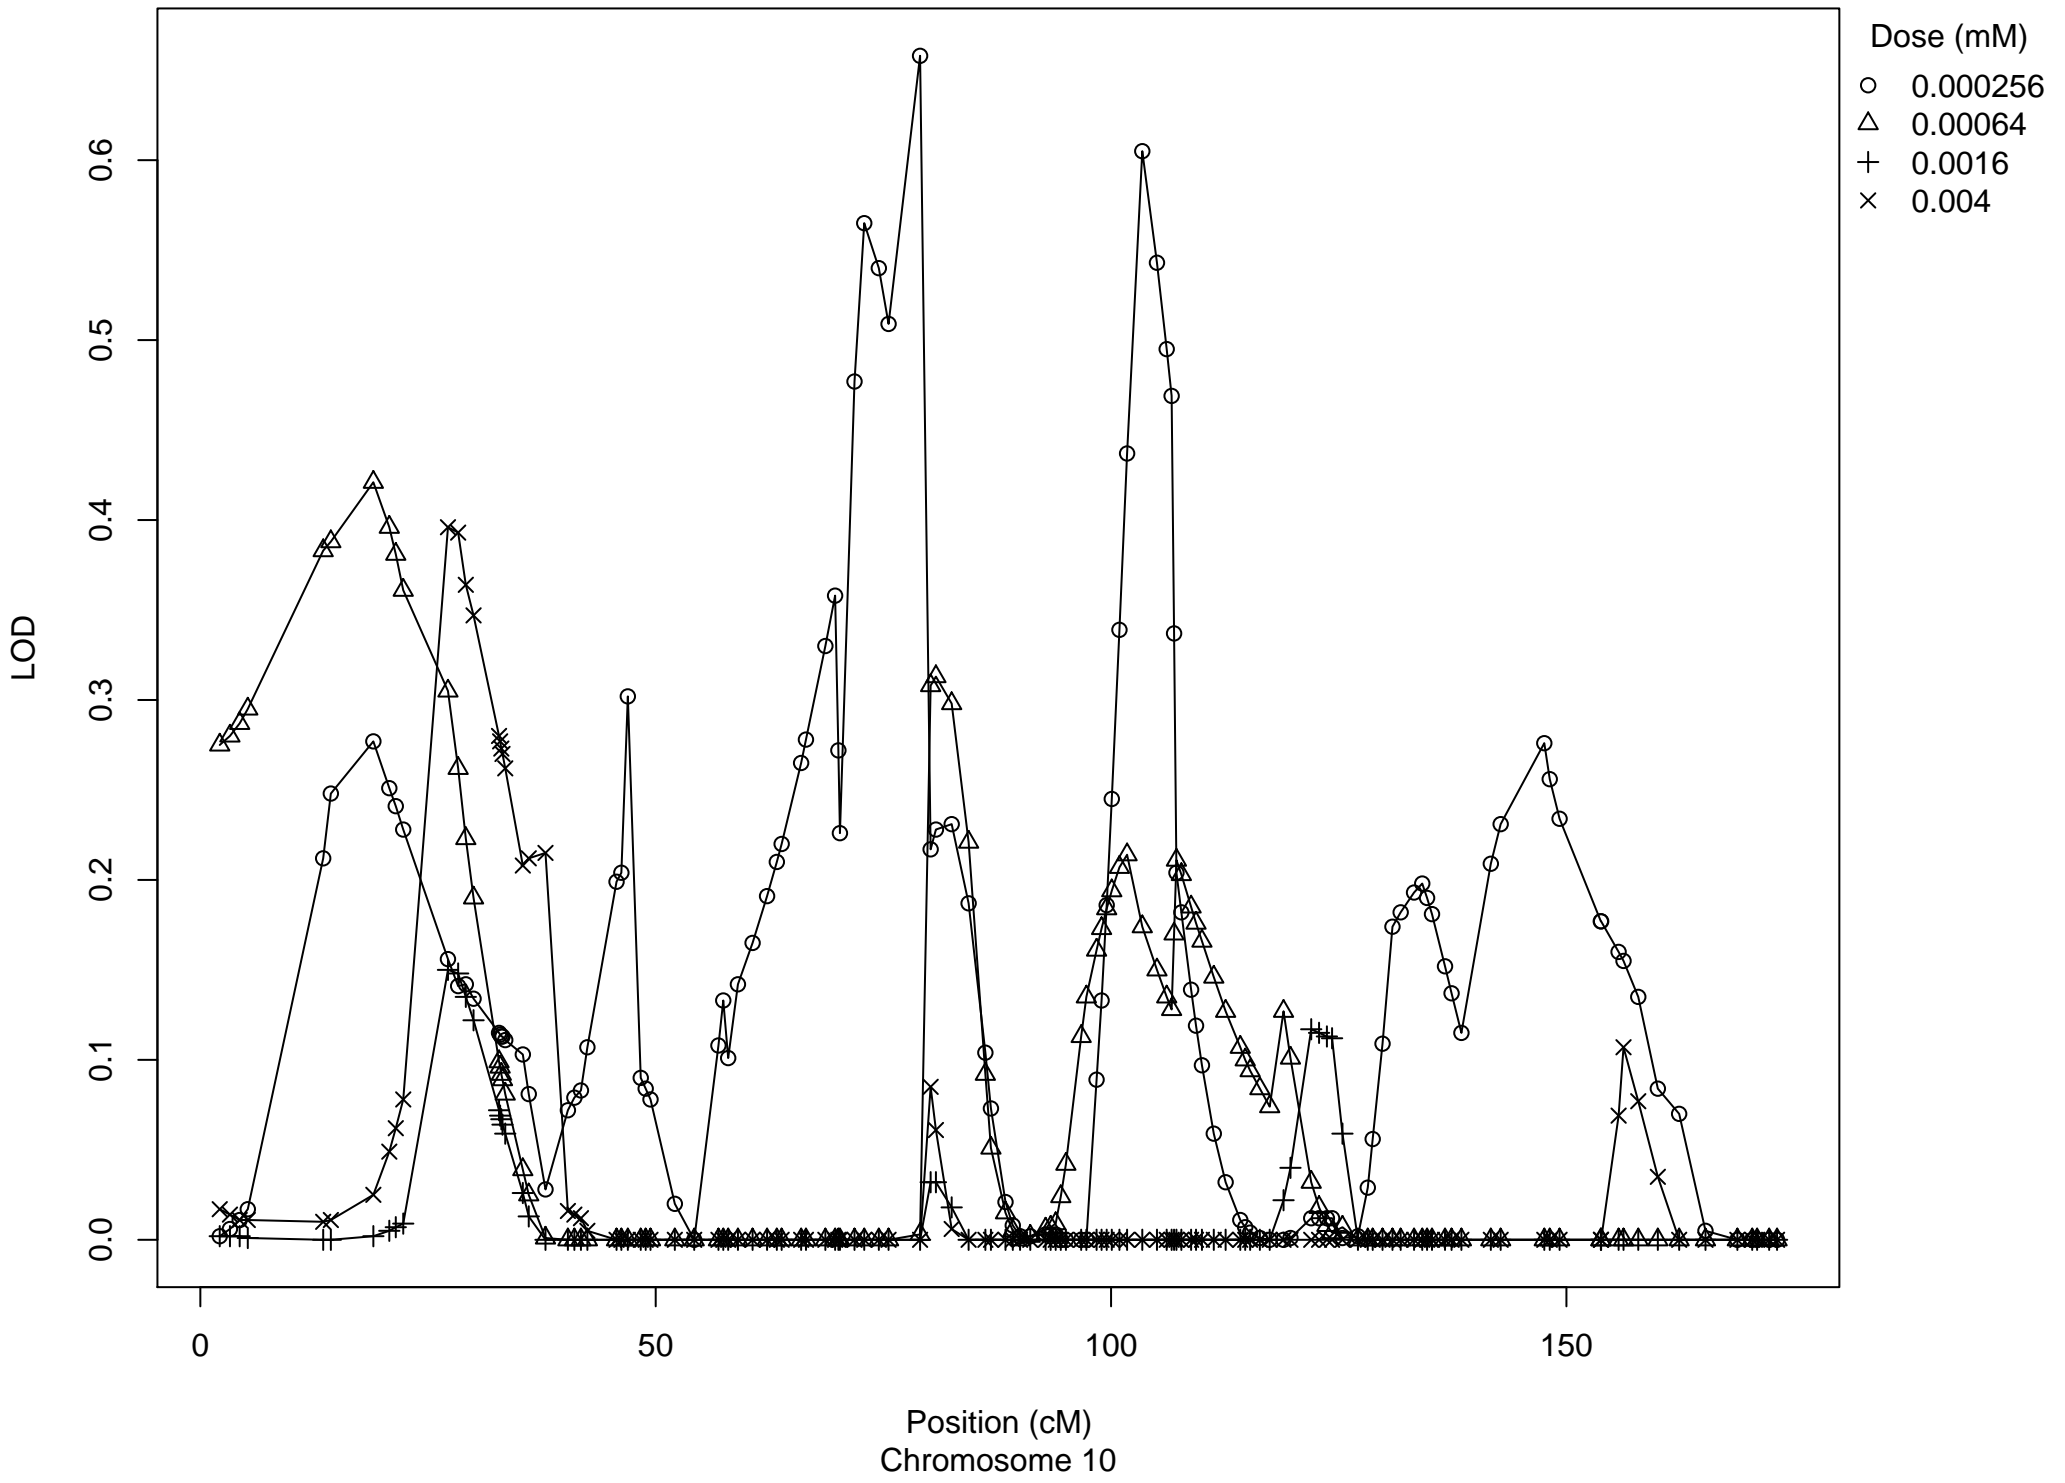

# Teniposide (Teni)

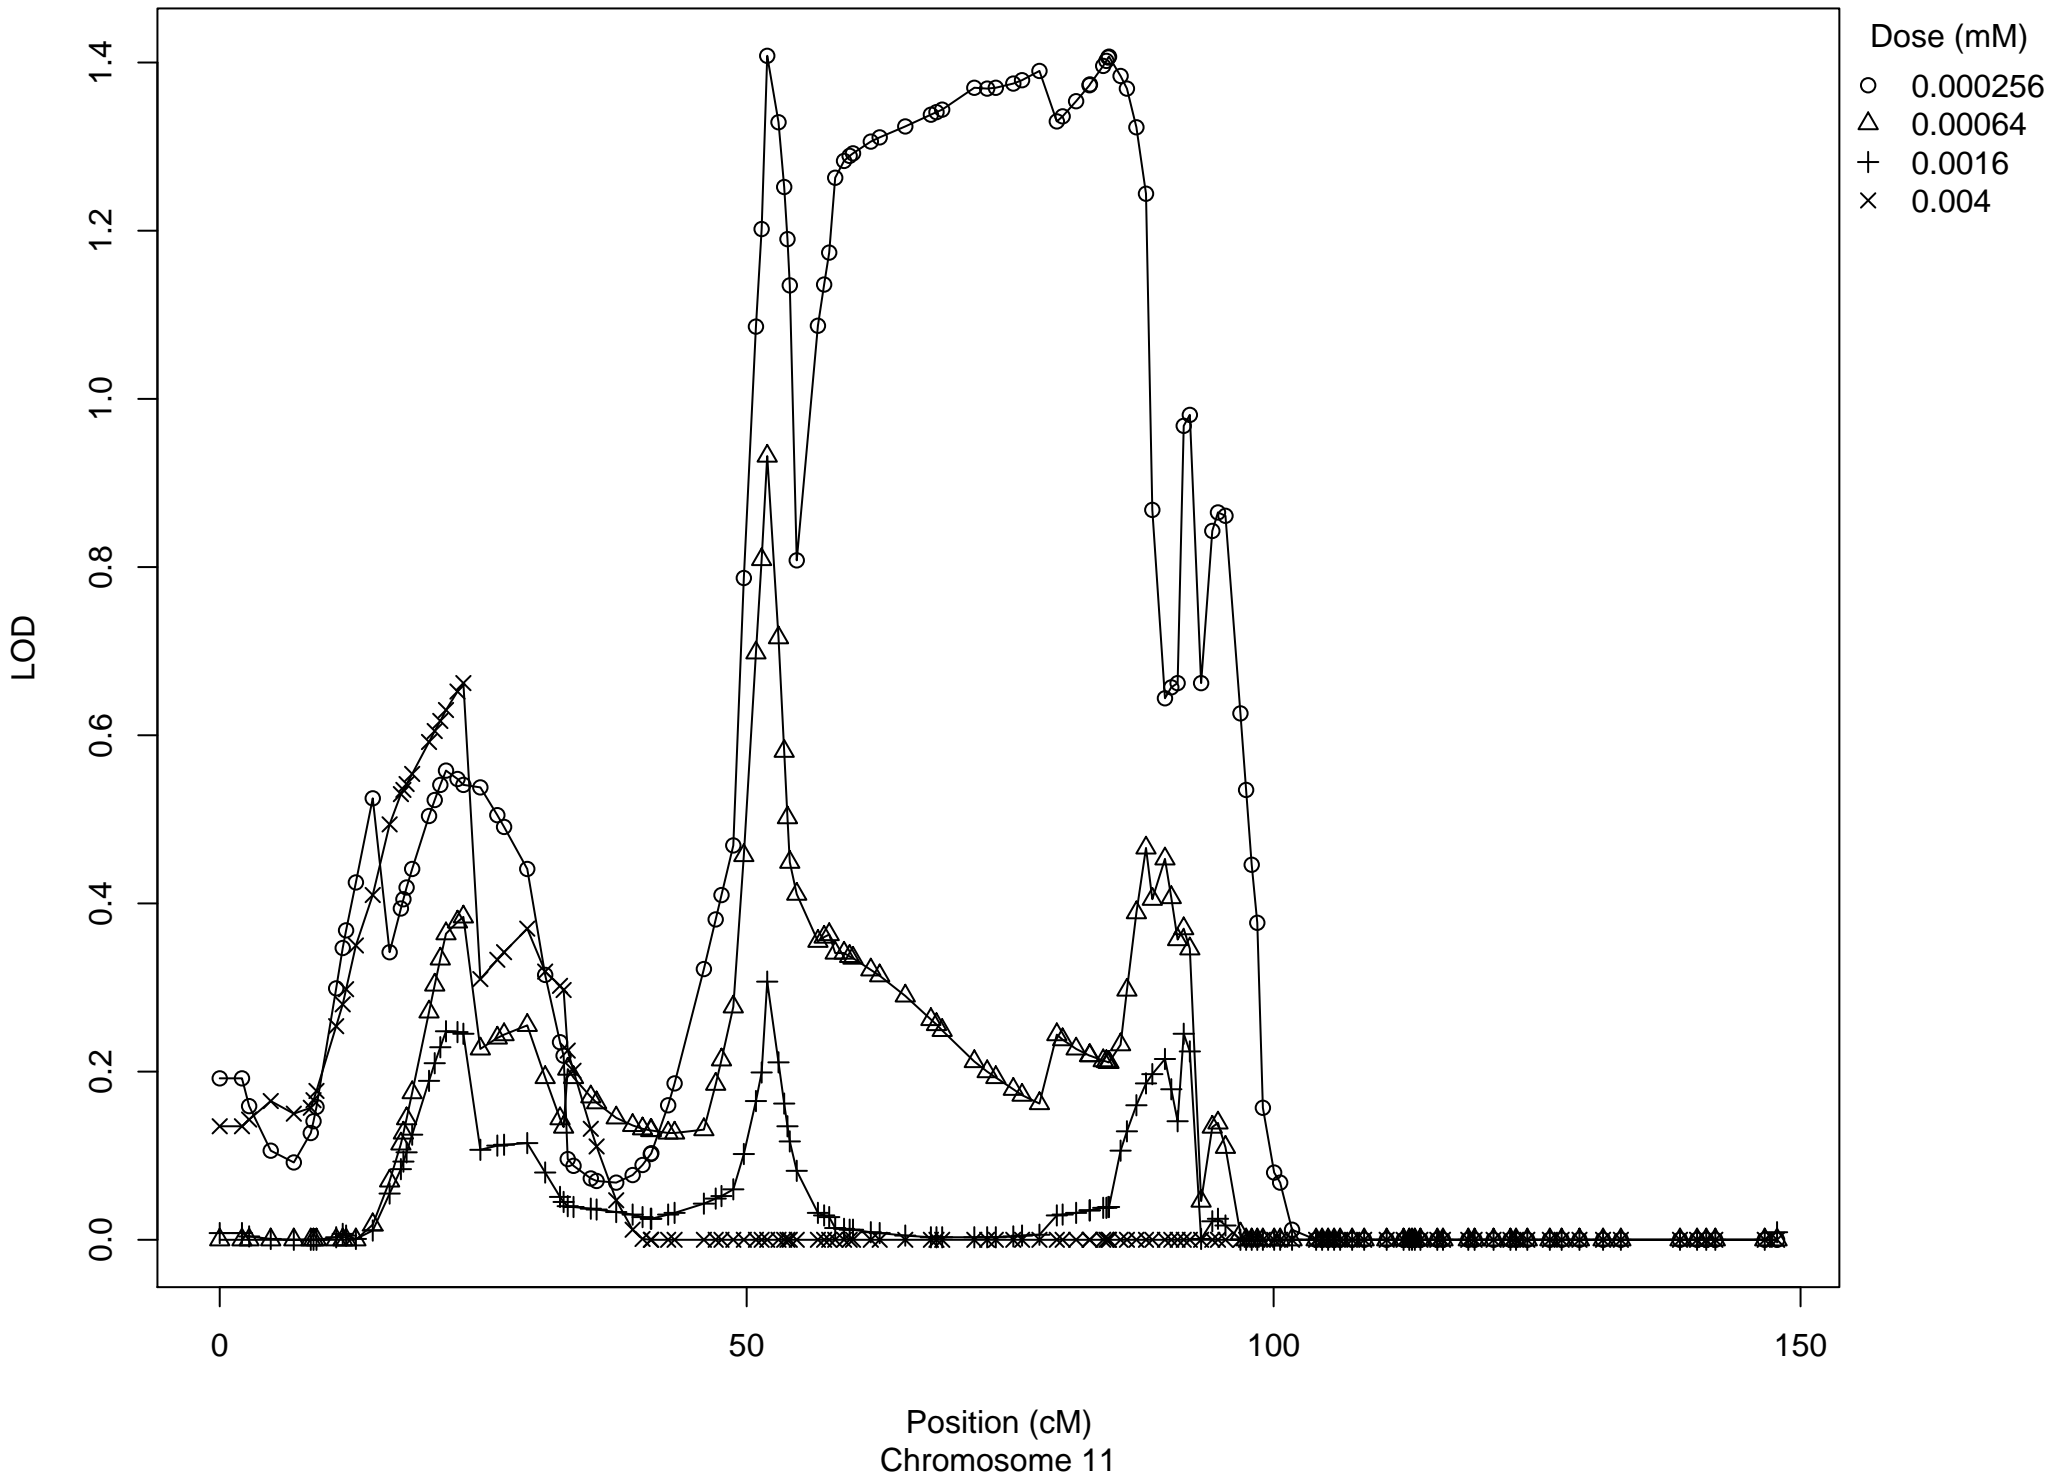

# Teniposide (Teni)

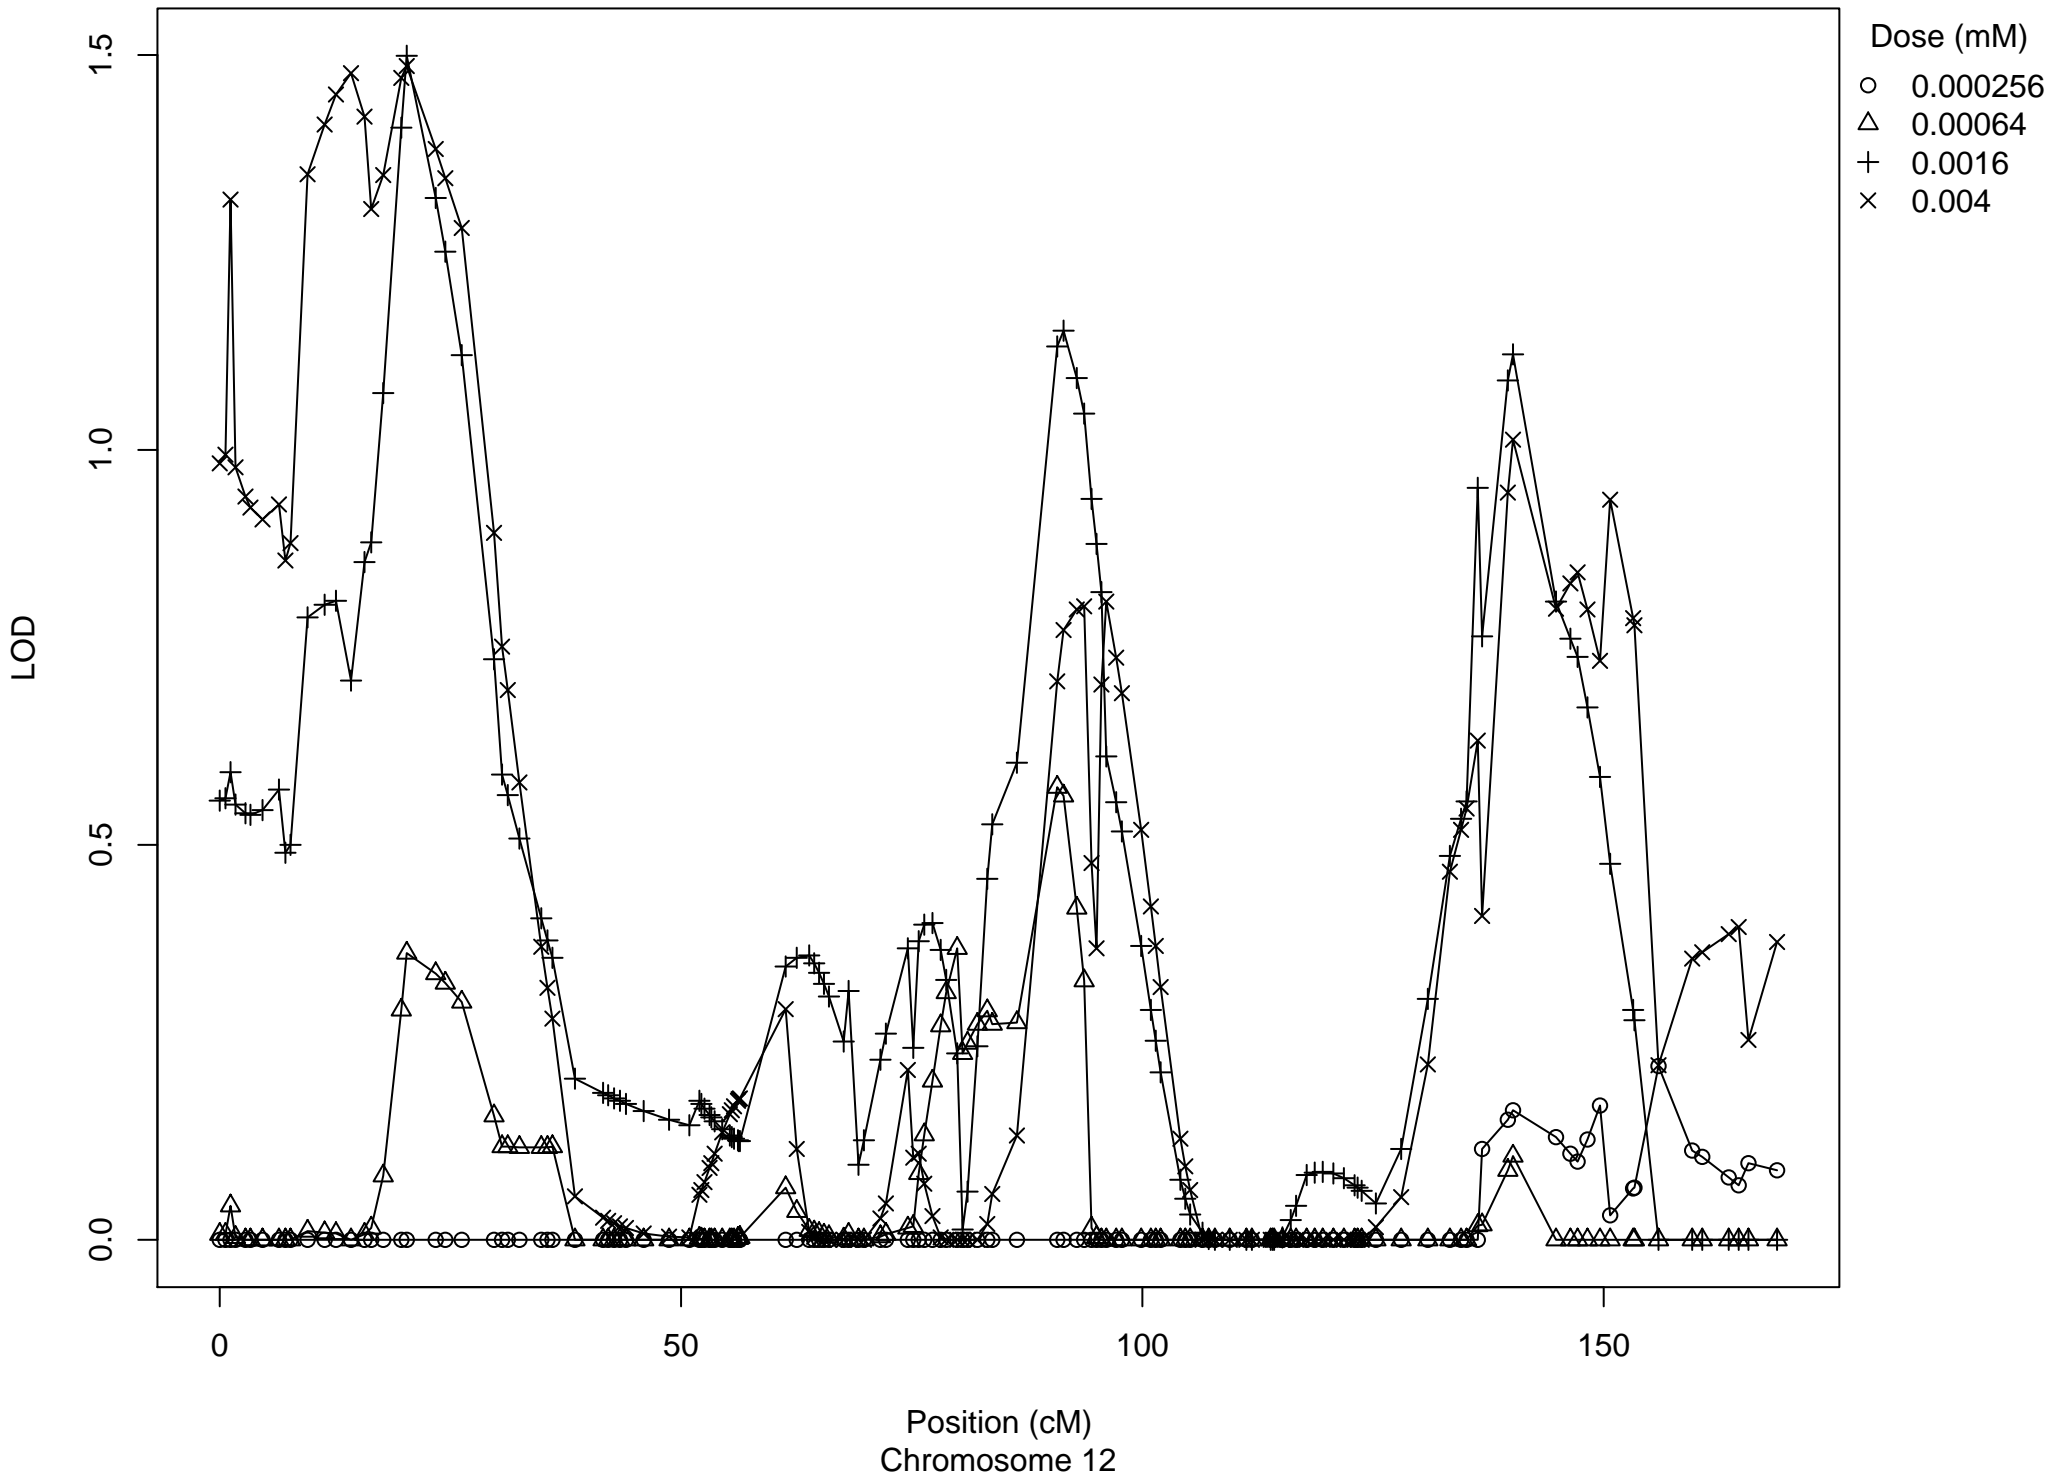

# Teniposide (Teni)

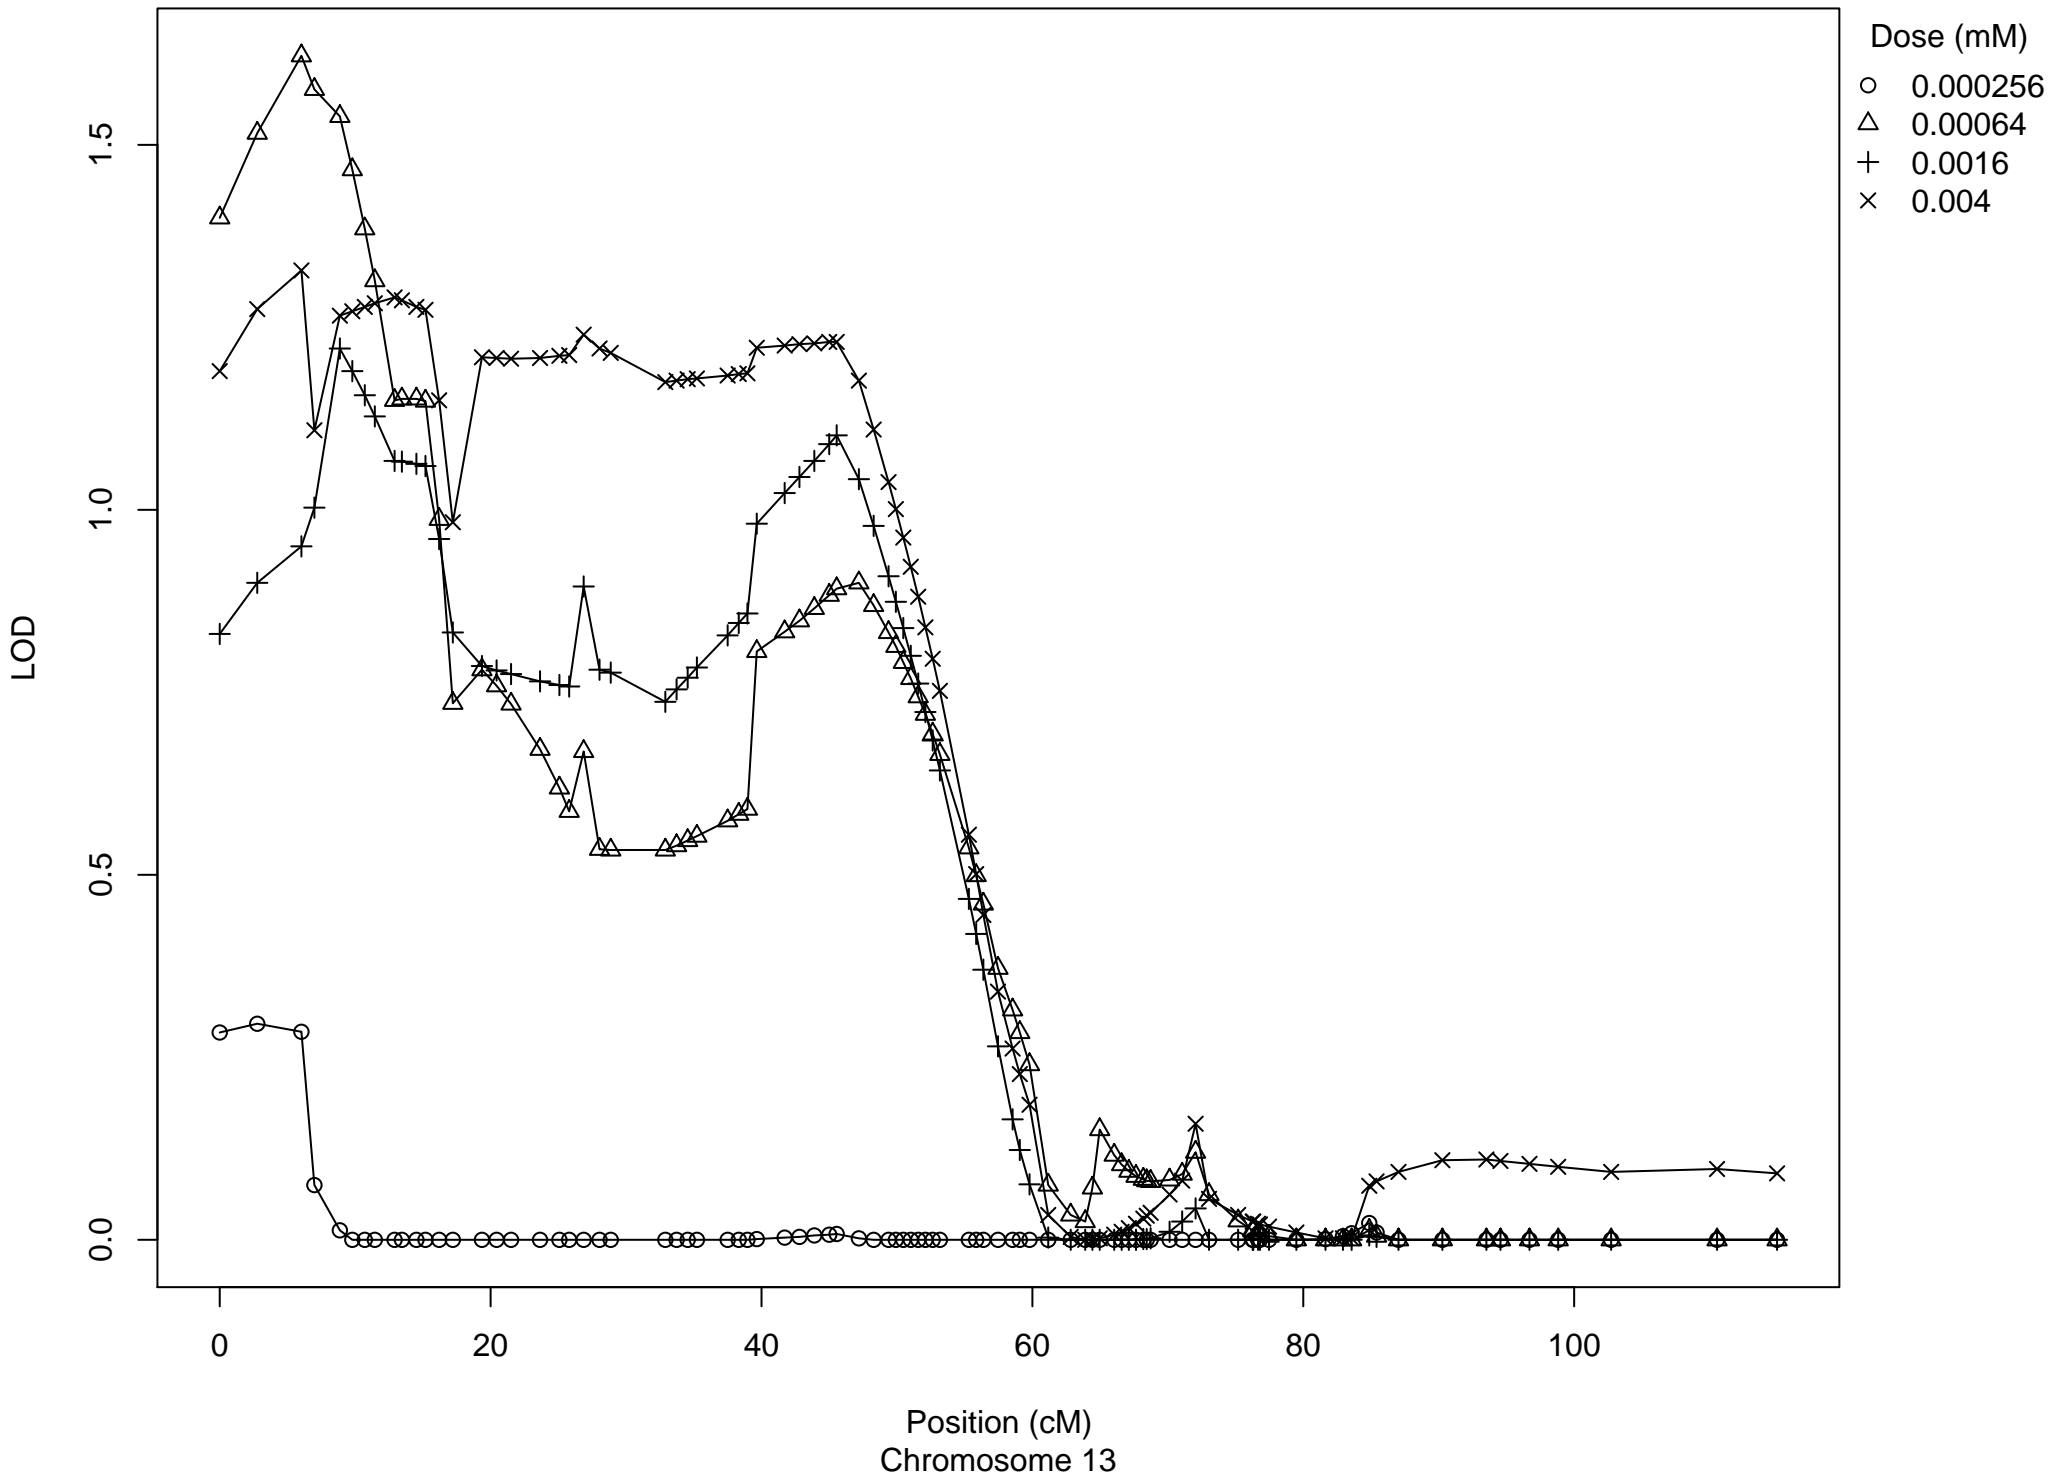

# Teniposide (Teni)

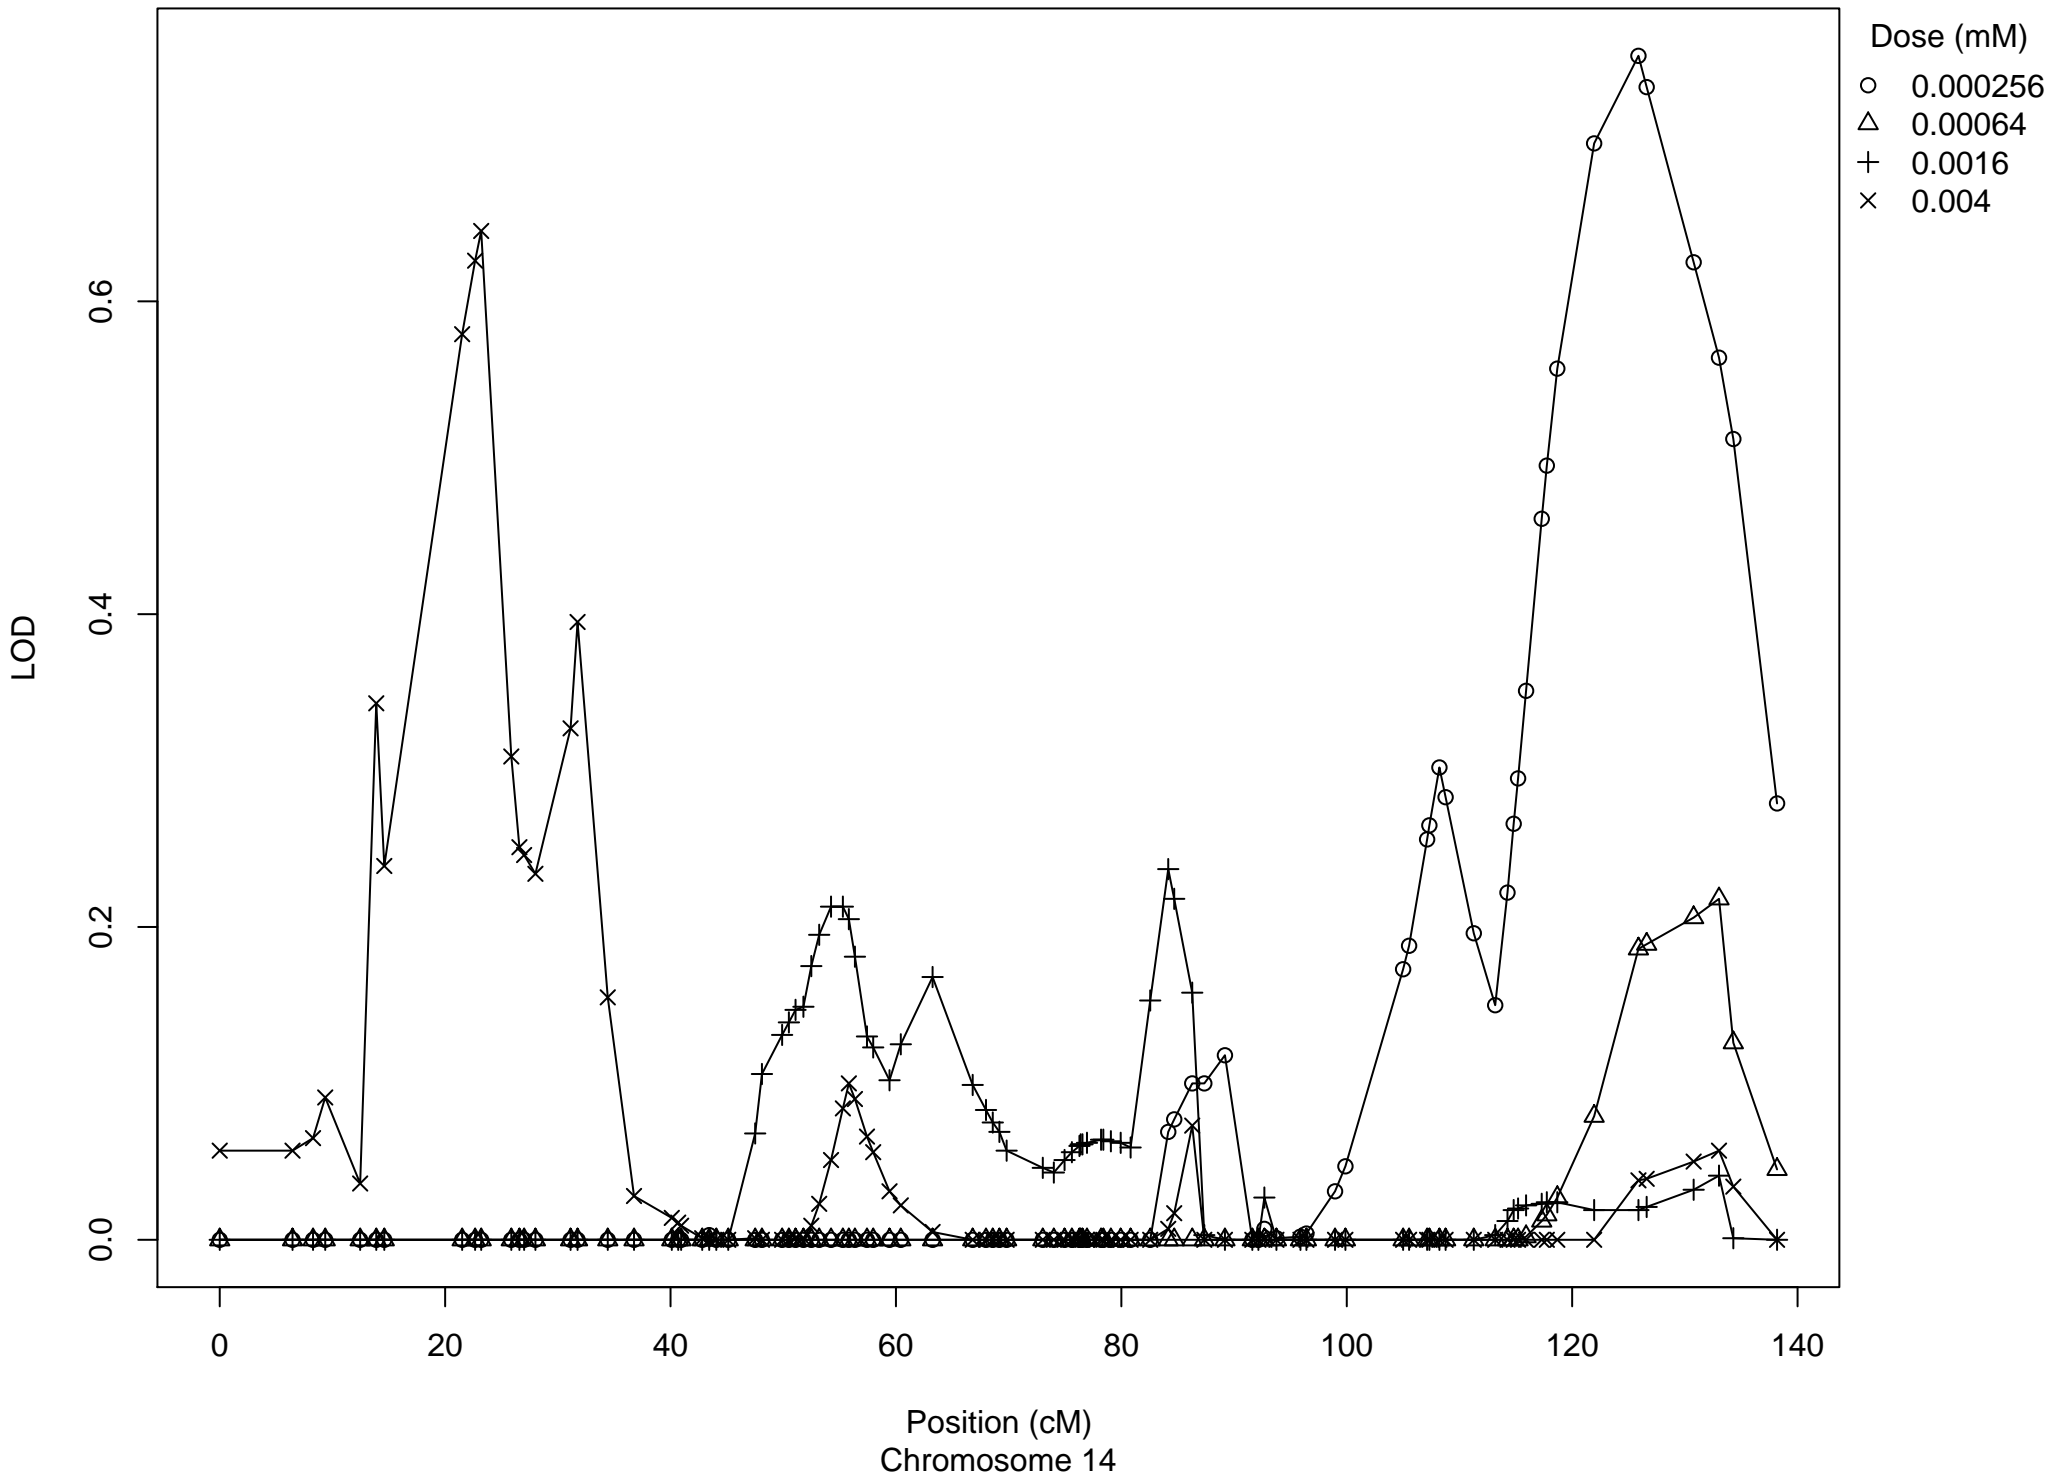

# Teniposide (Teni)

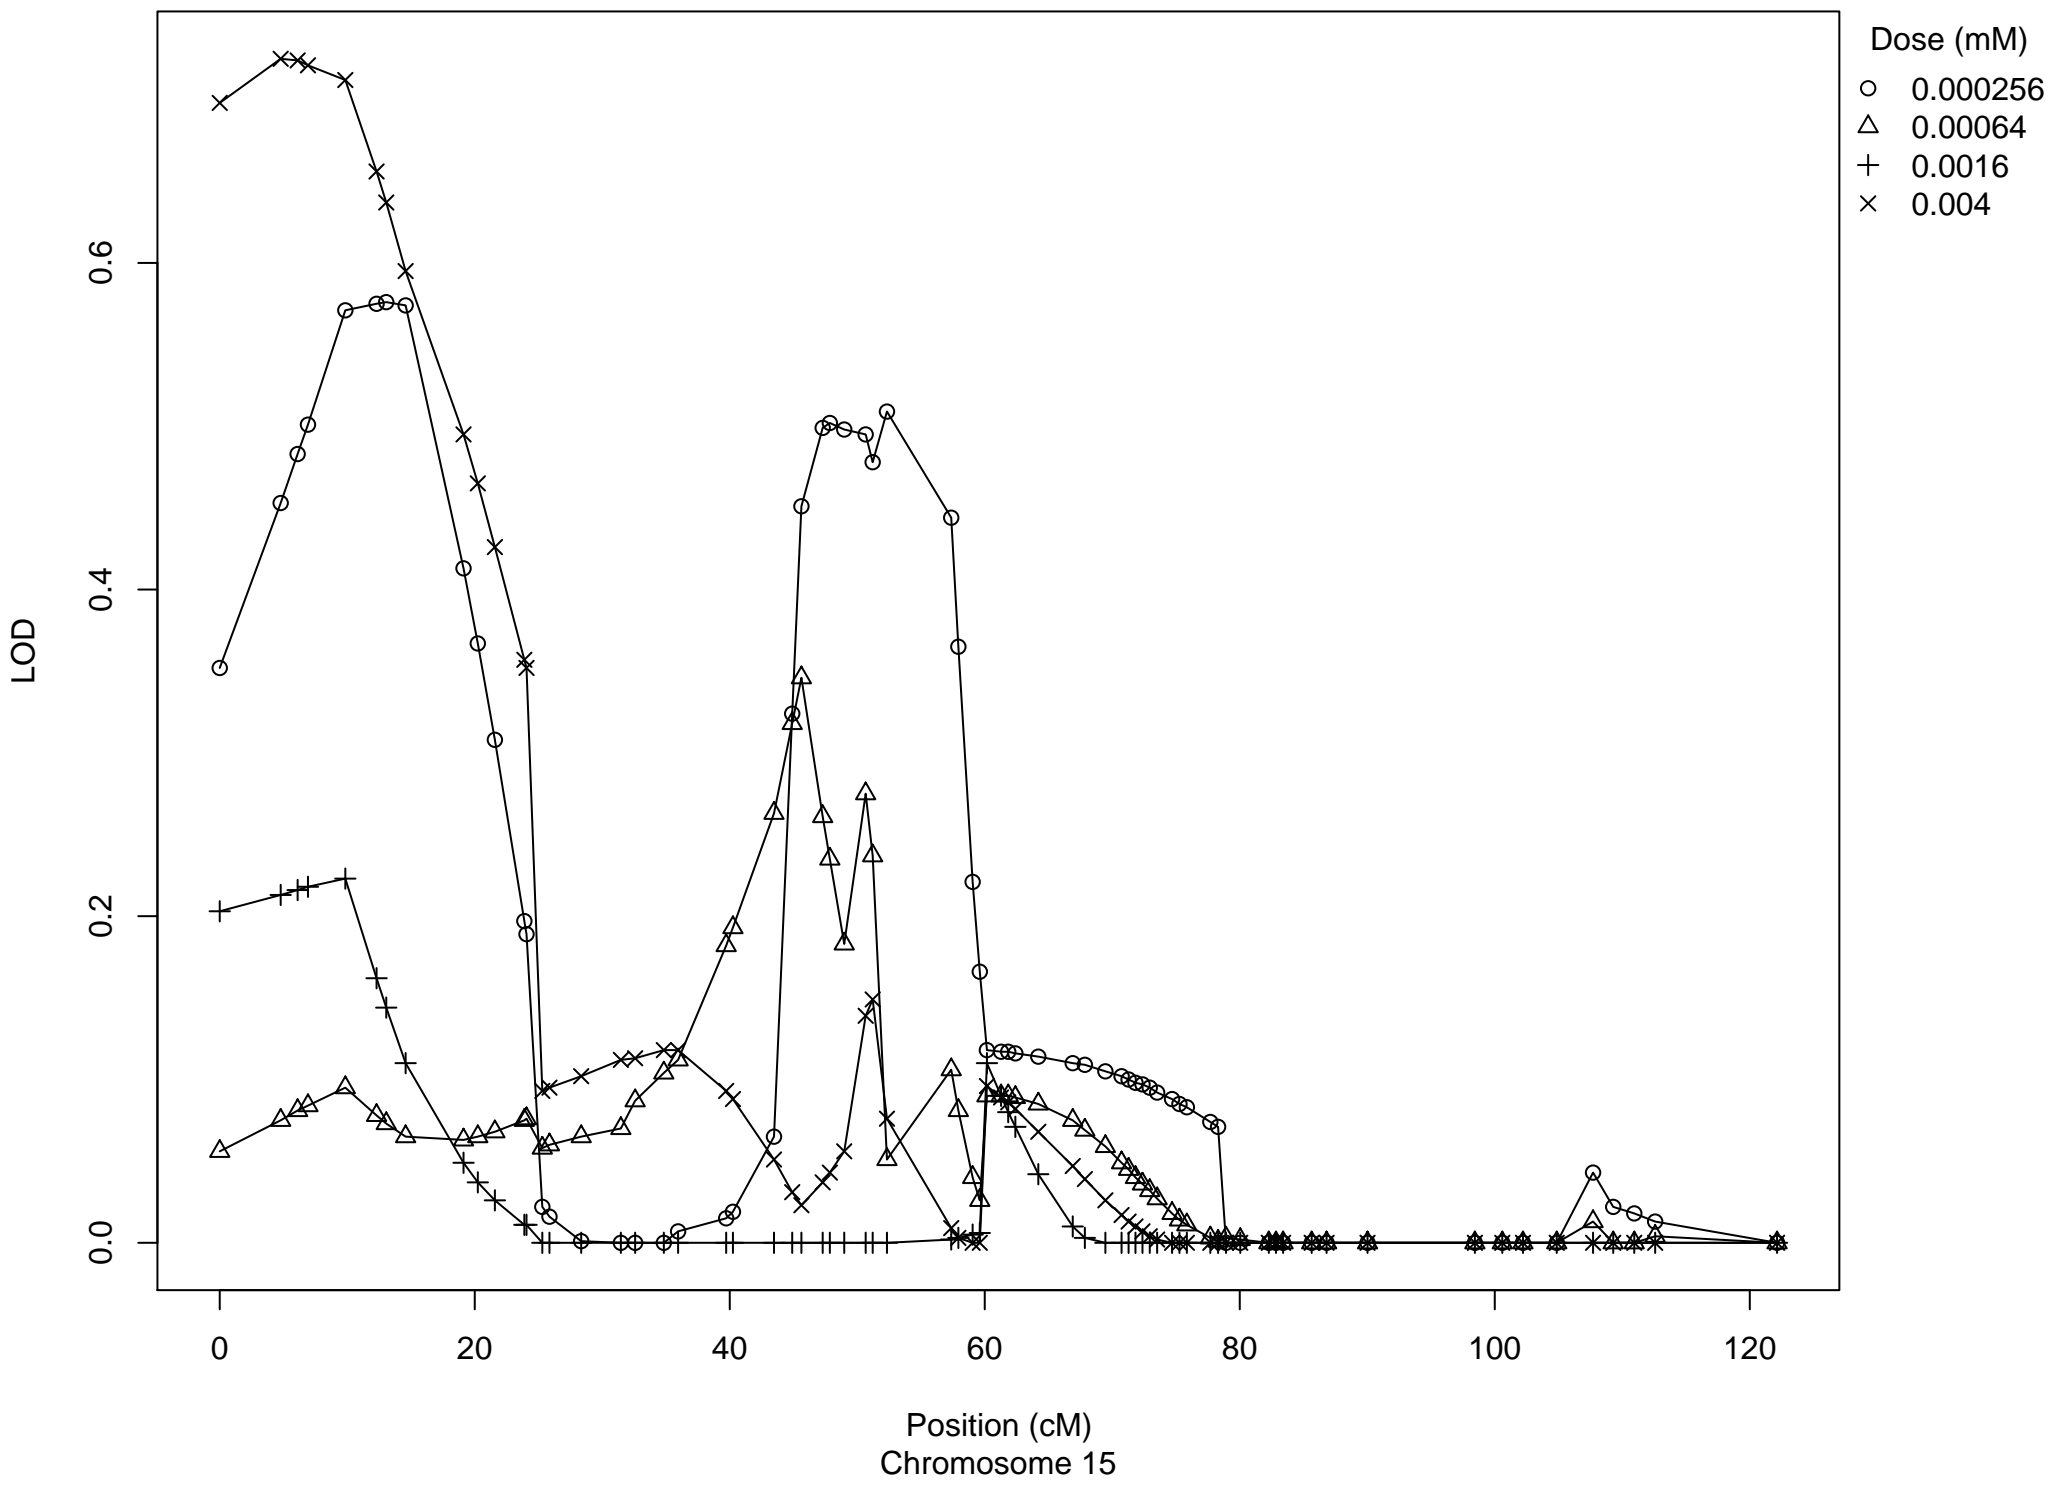

# Teniposide (Teni)

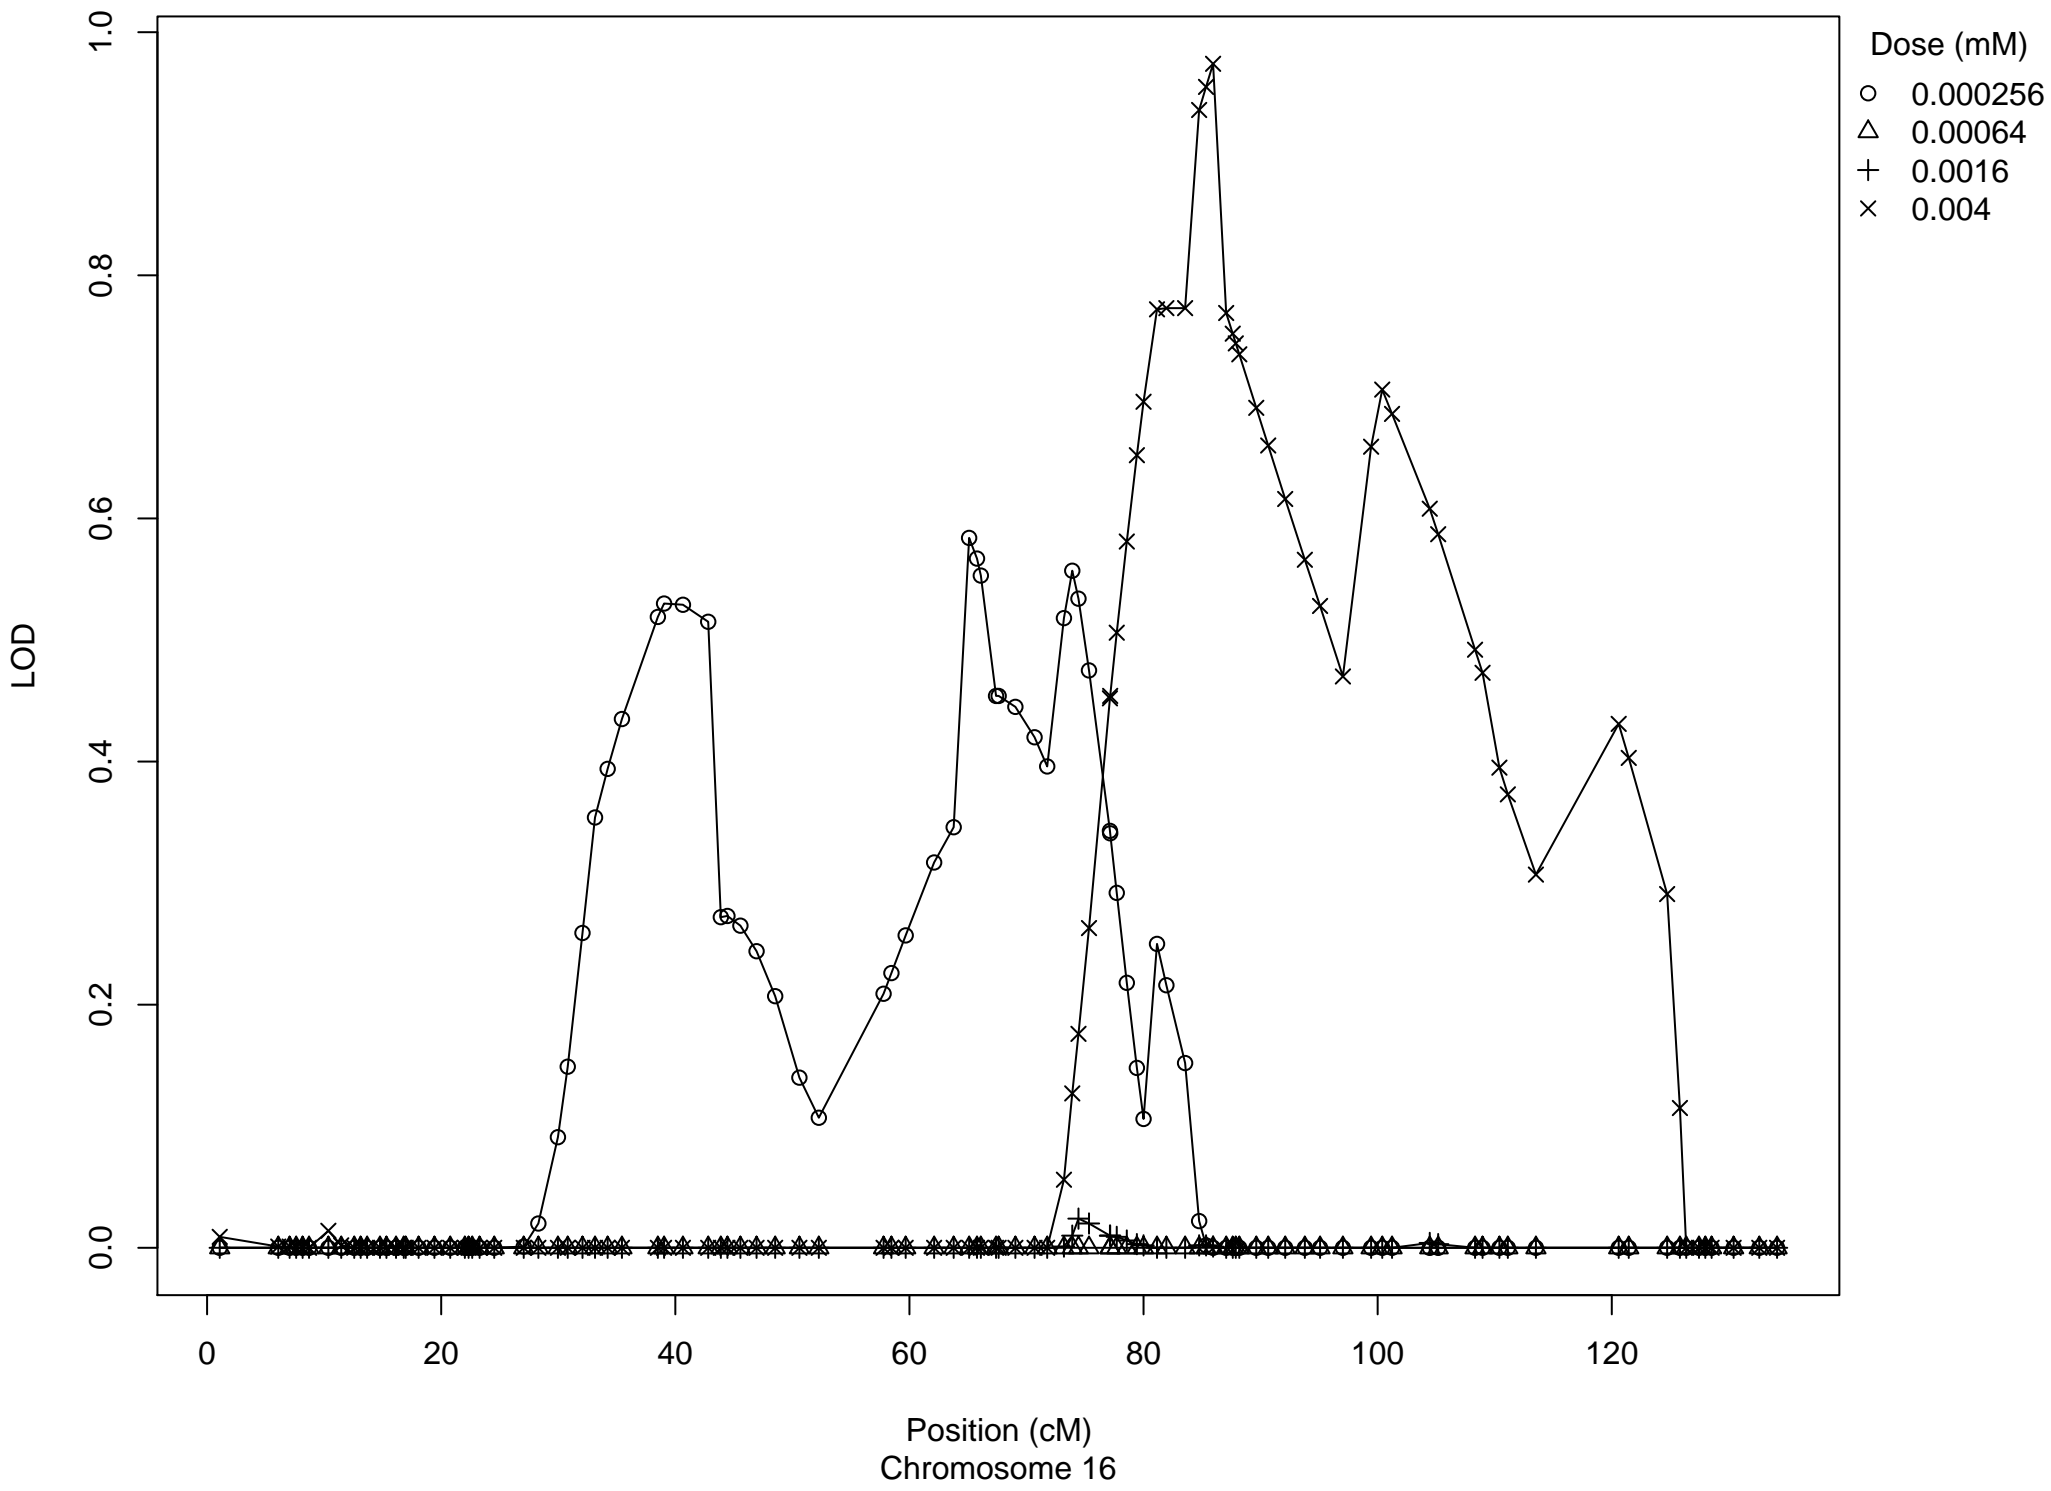



# Teniposide (Teni)

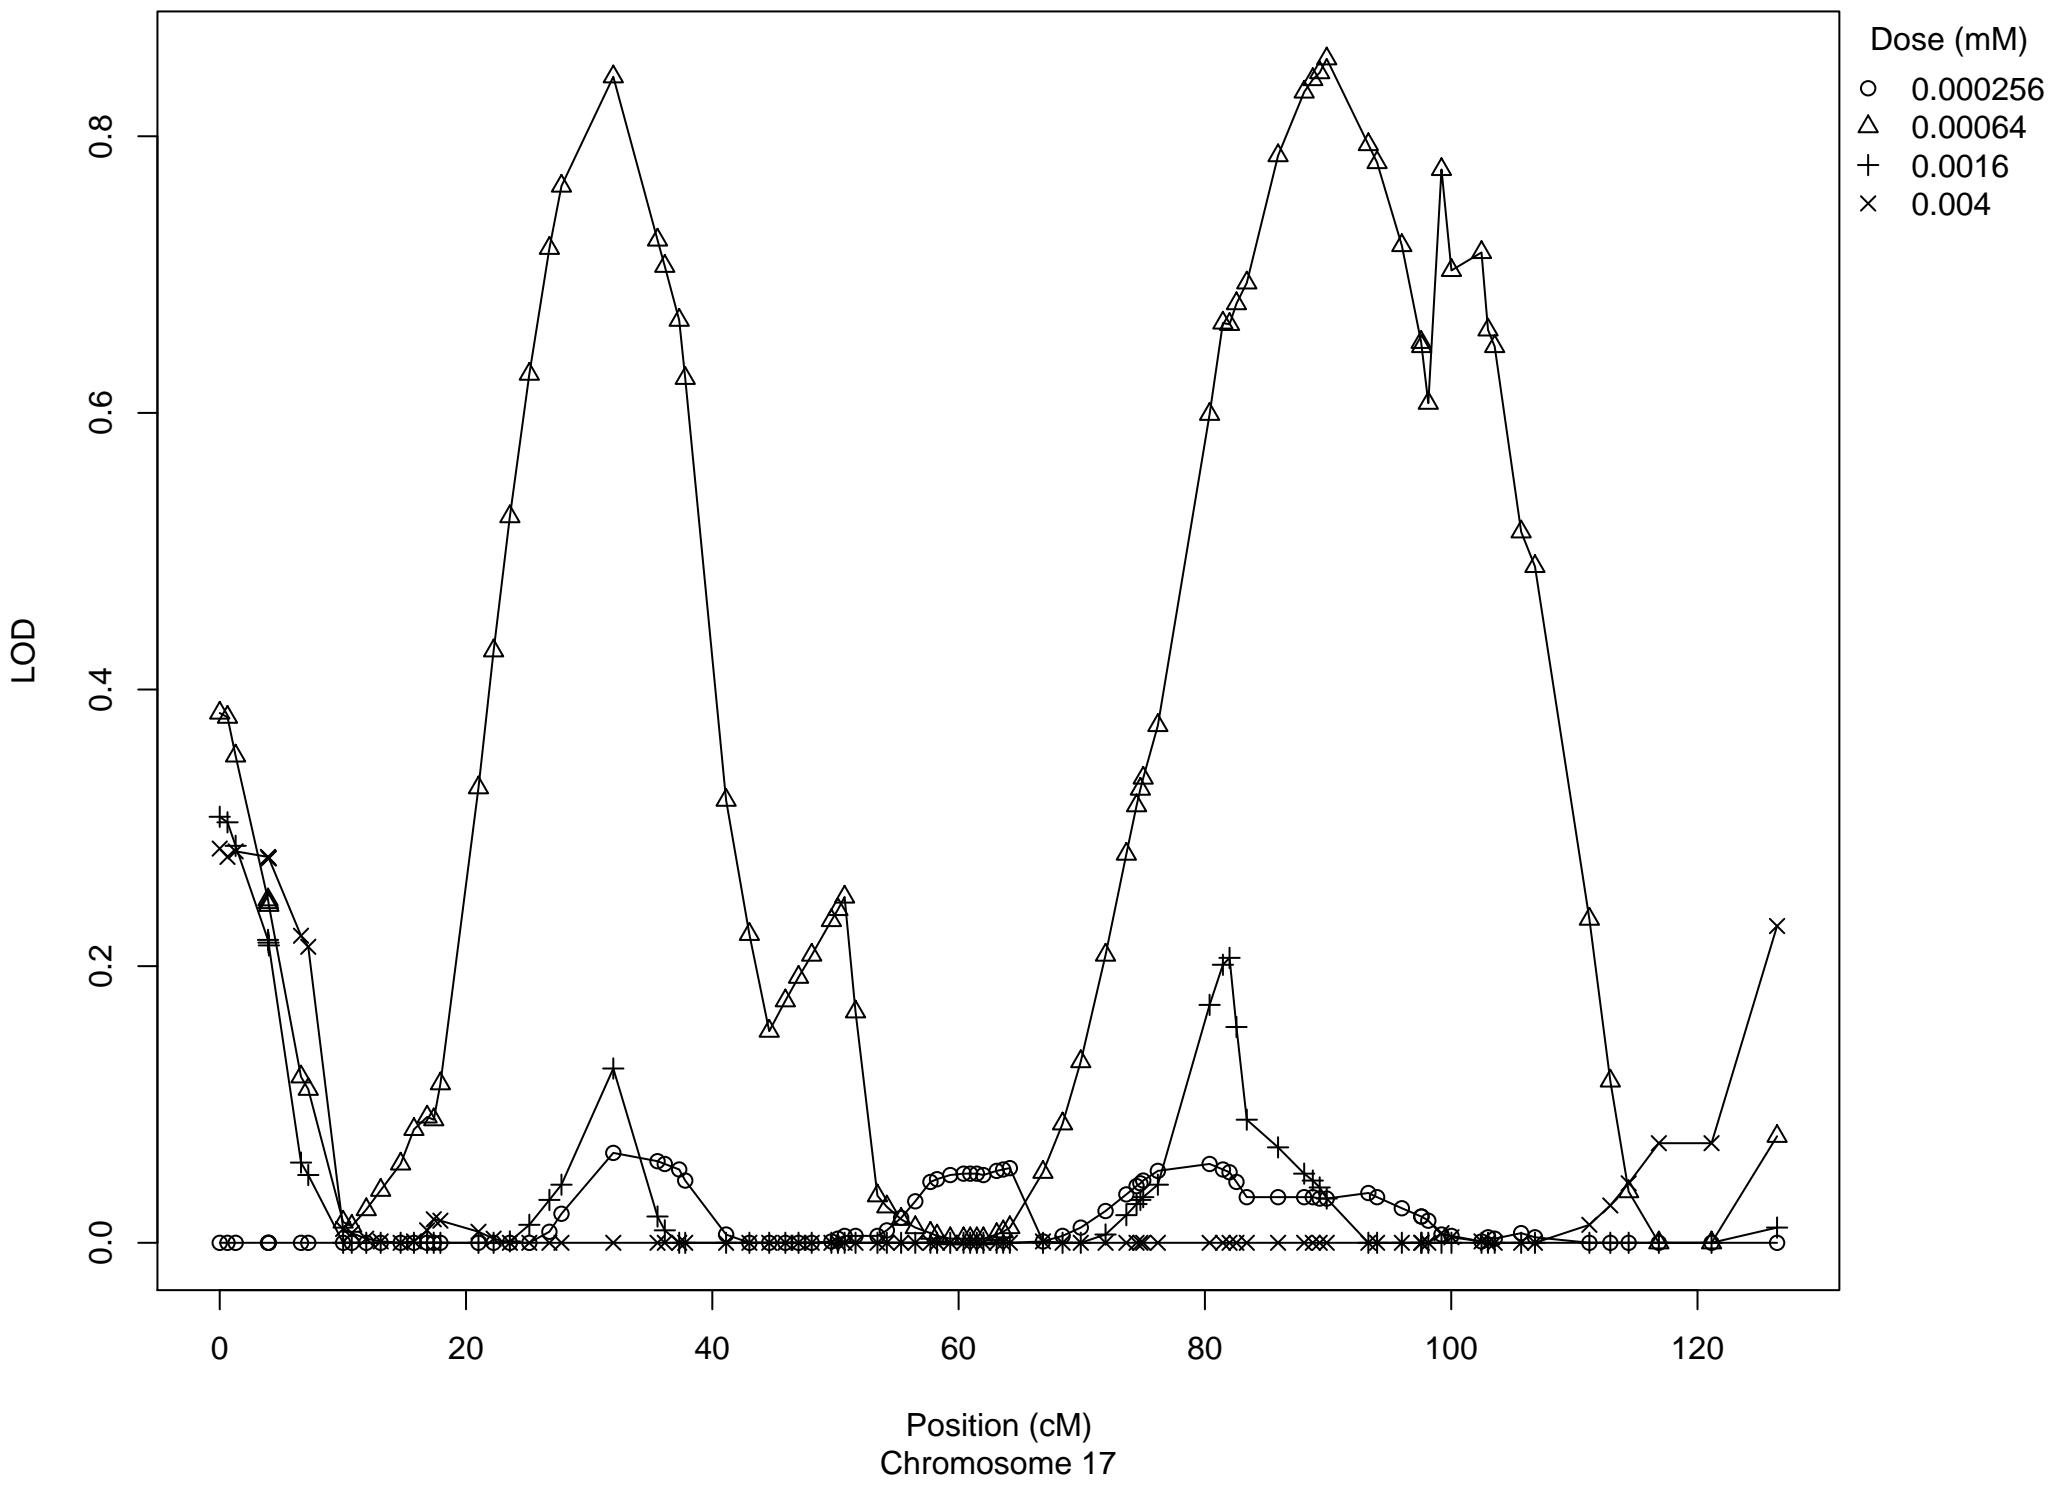

# Teniposide (Teni)

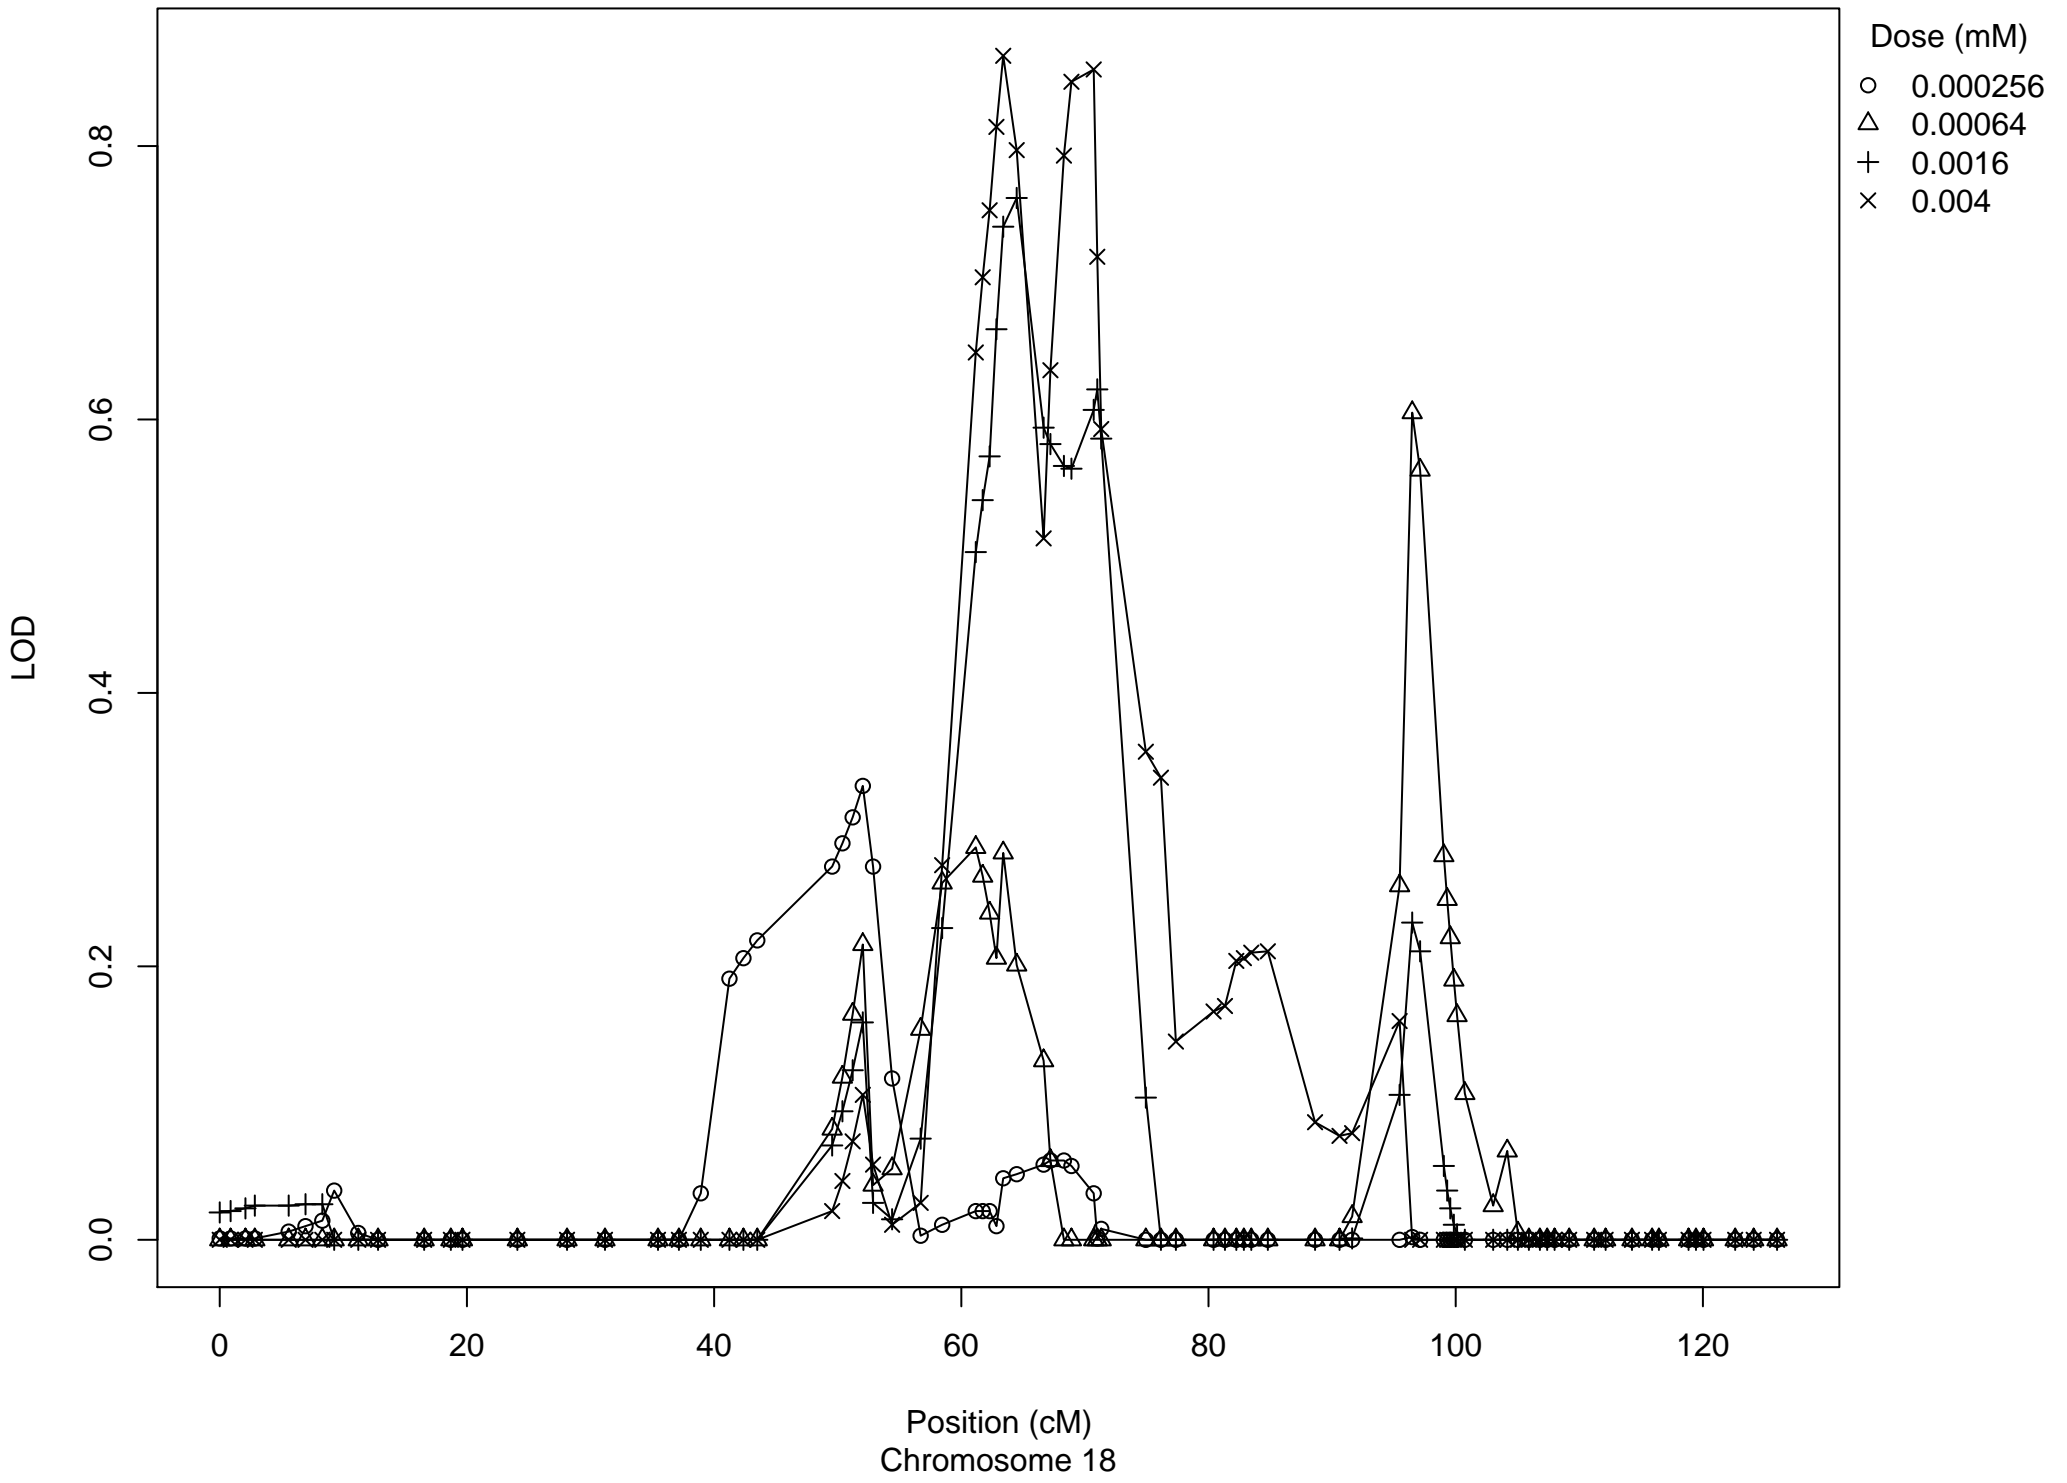

# Teniposide (Teni)

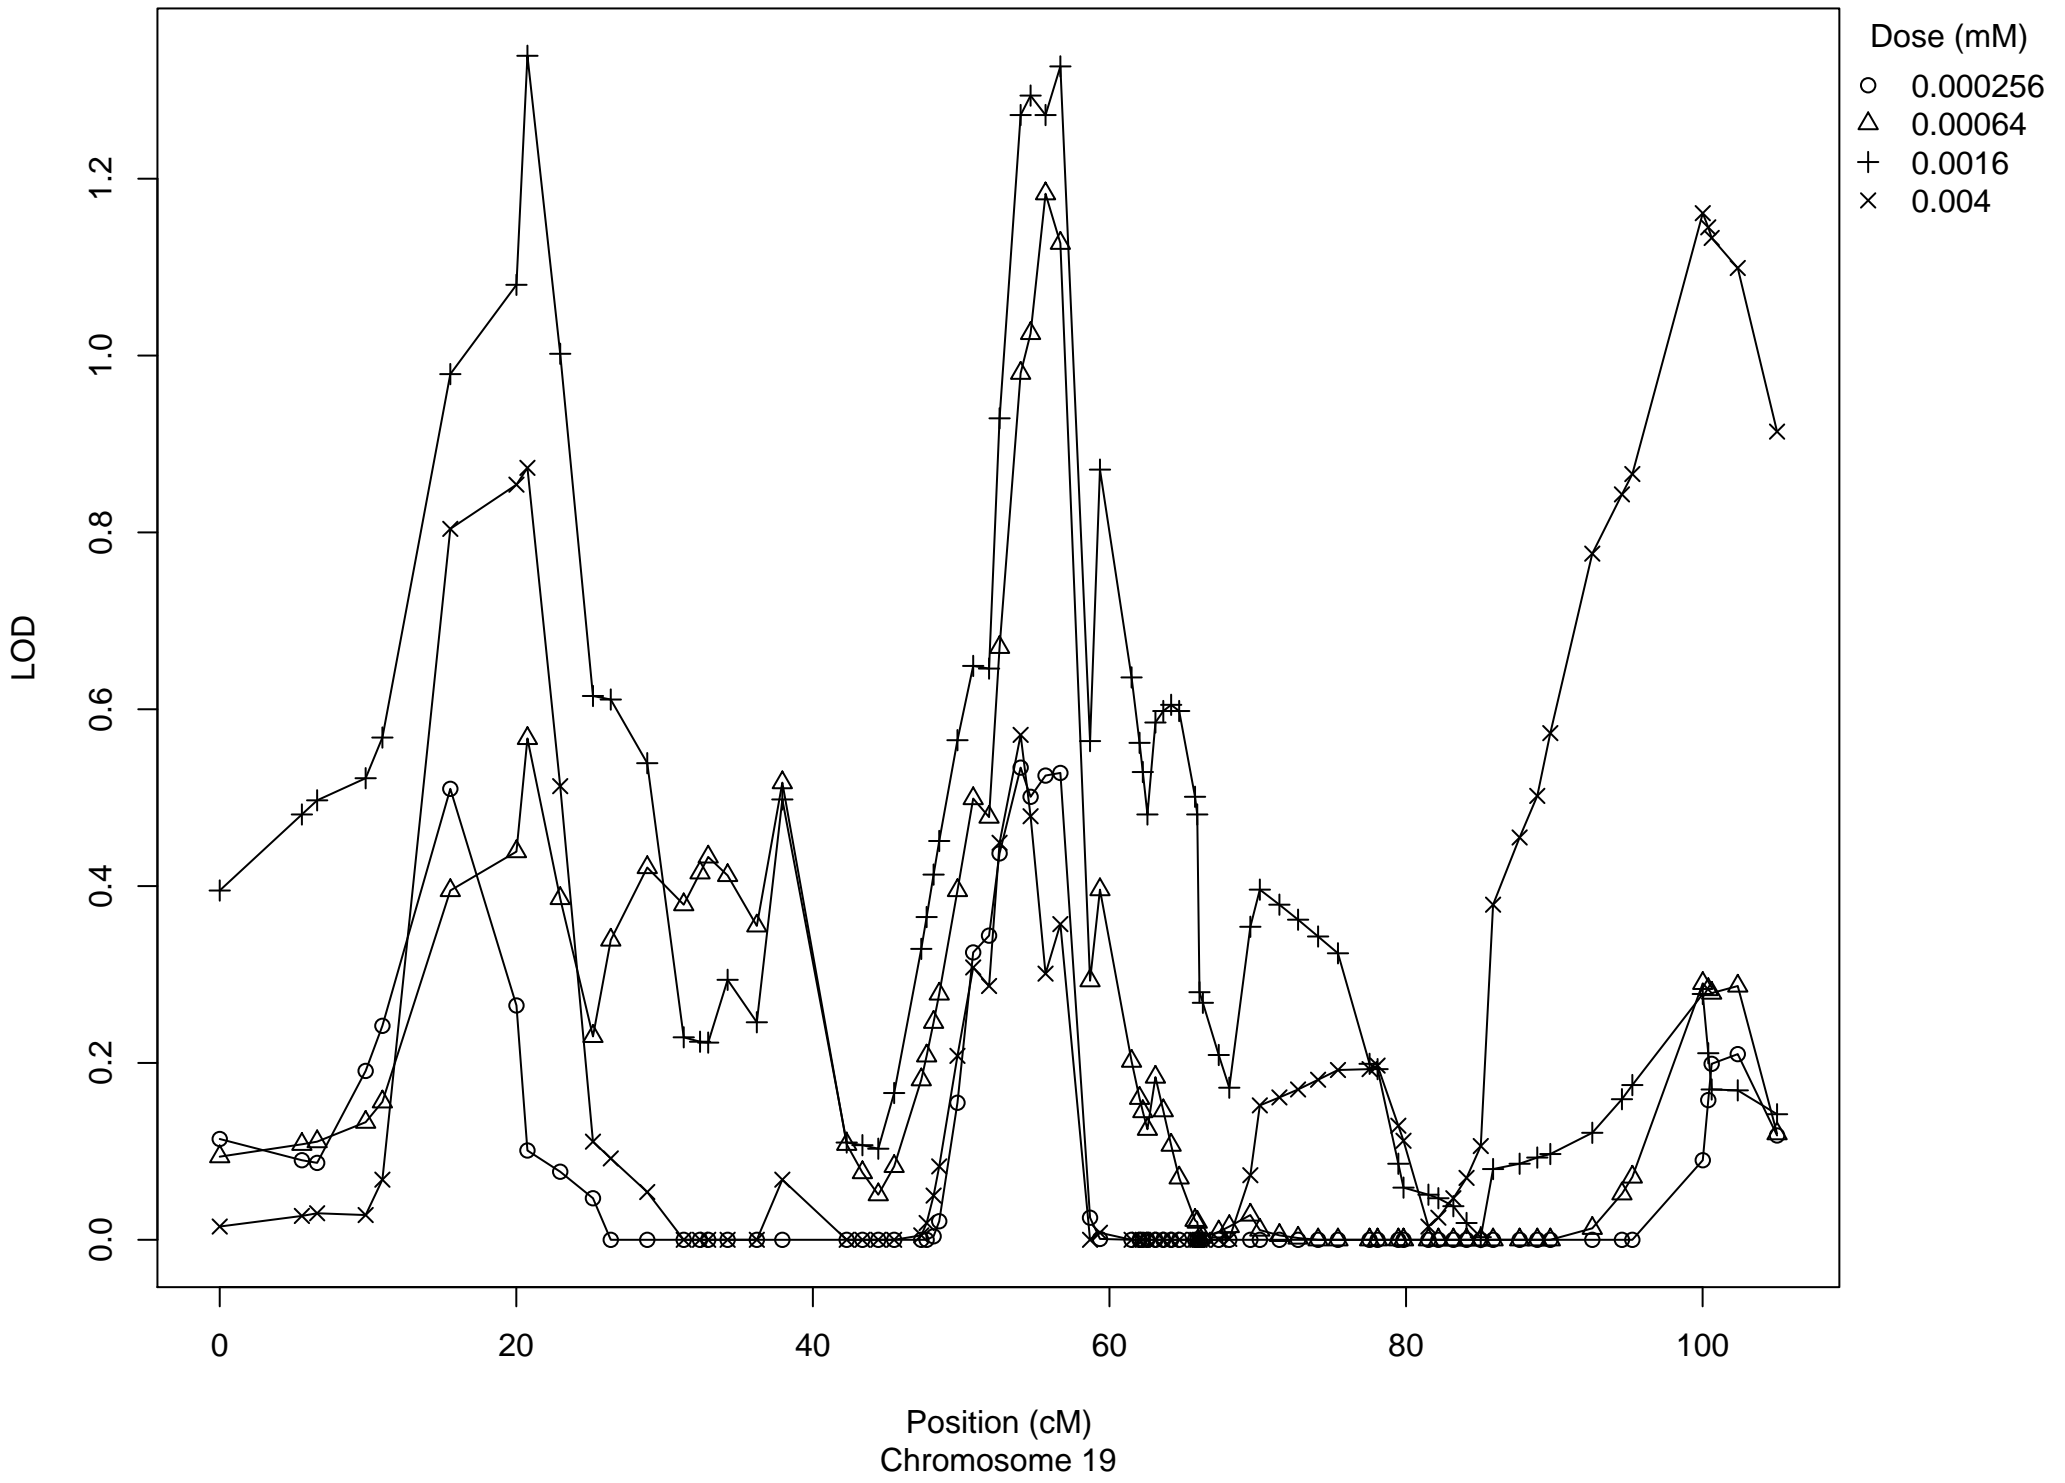

# Teniposide (Teni)

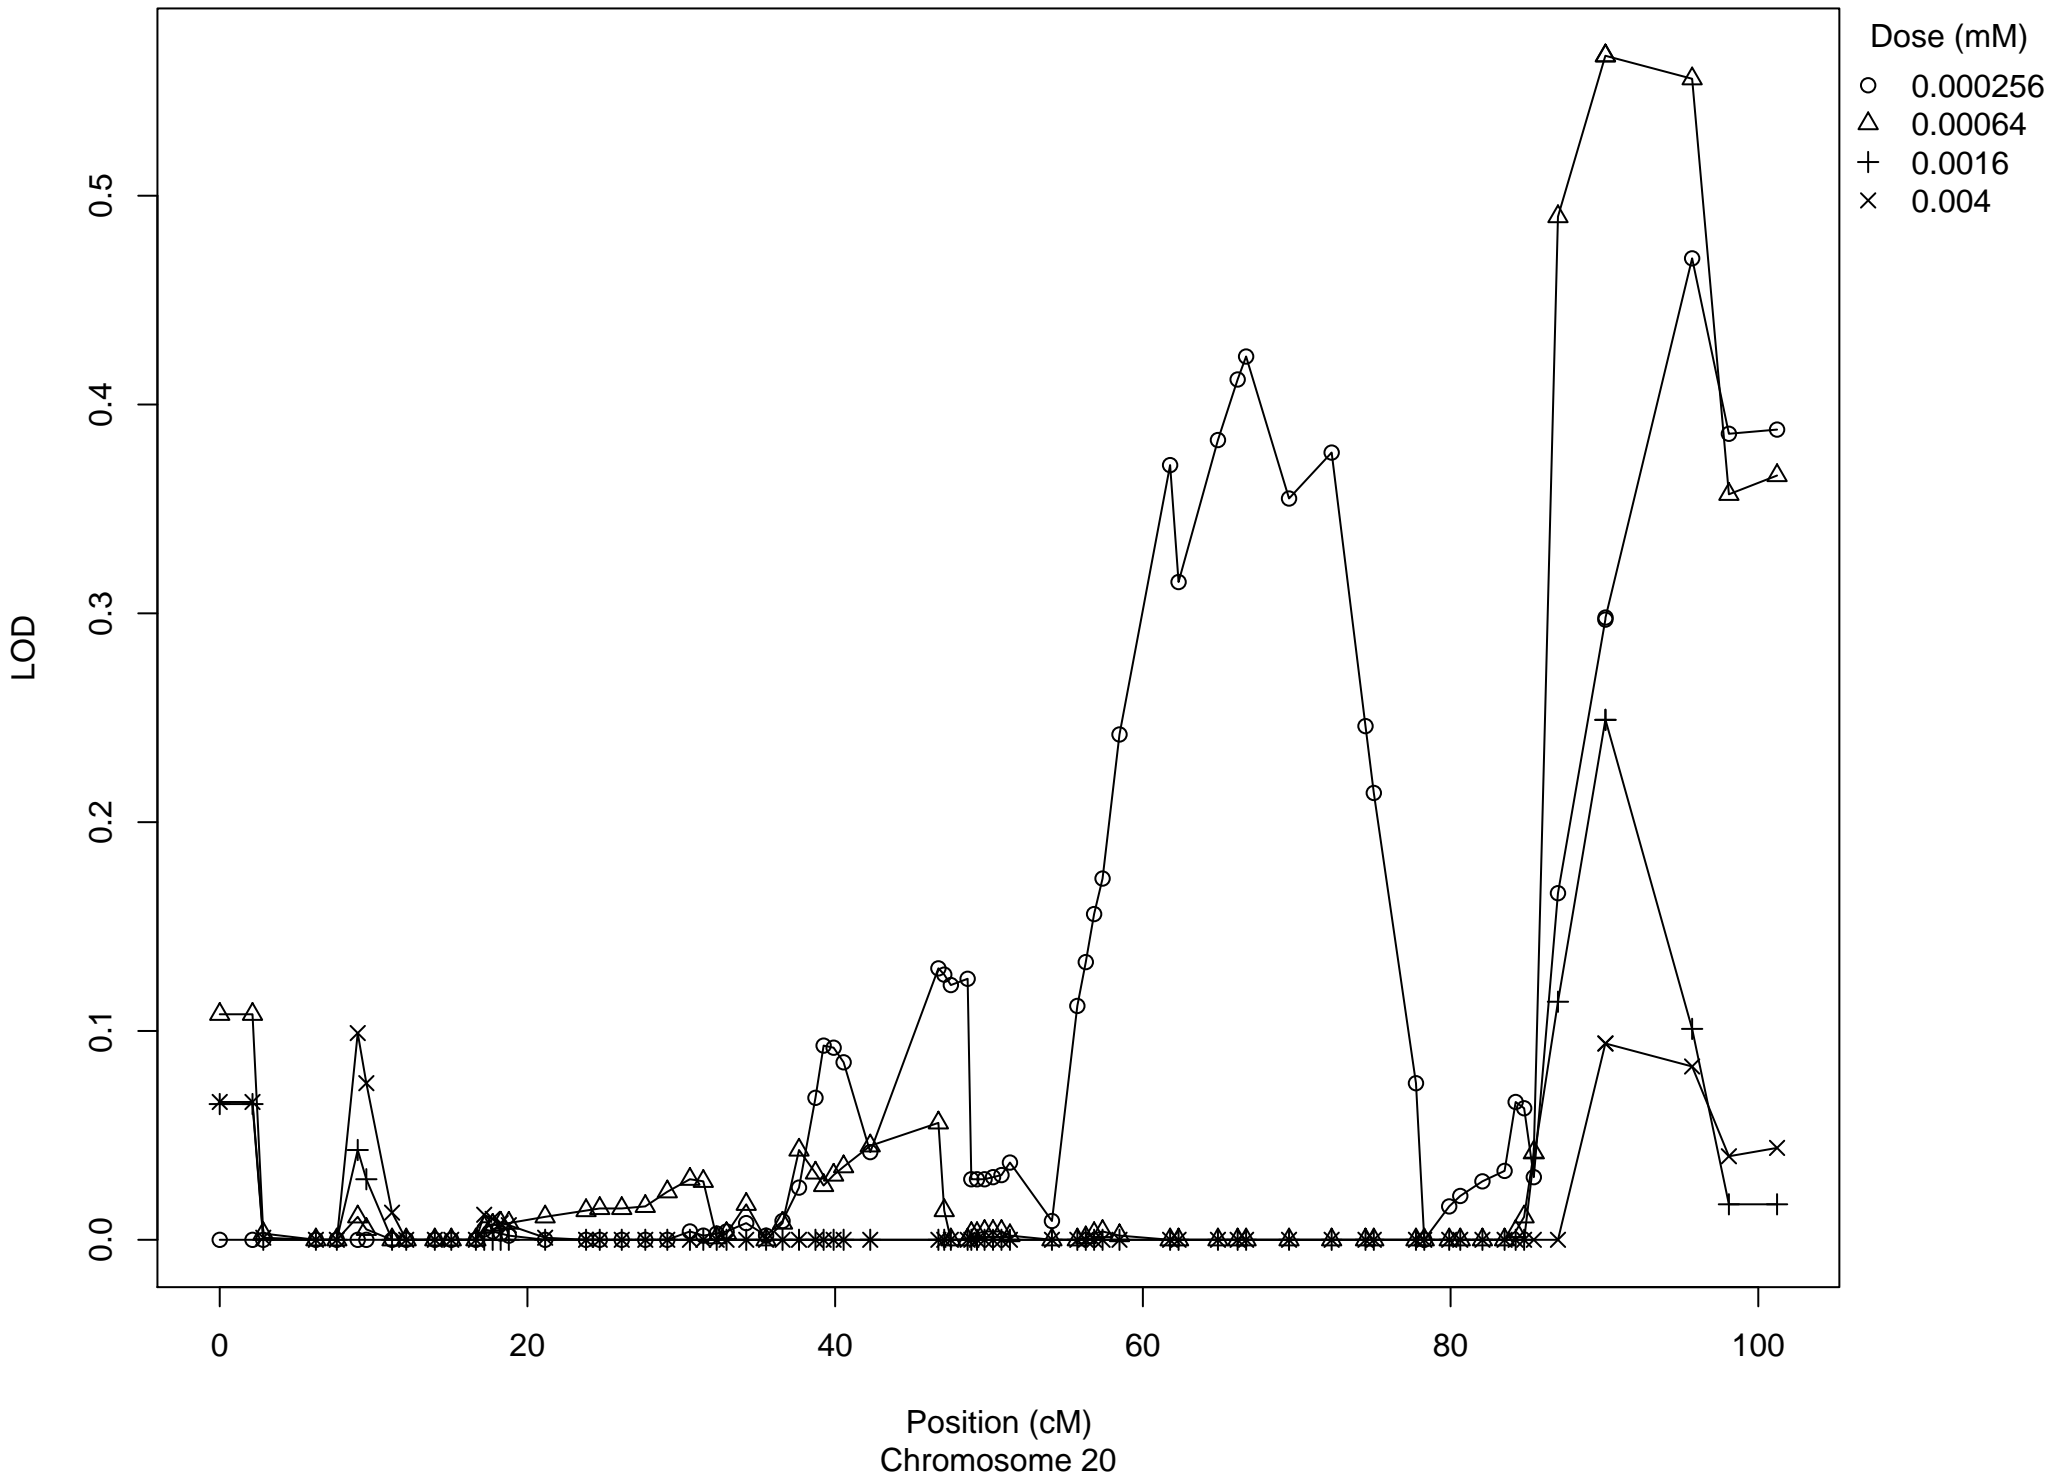

# Teniposide (Teni)

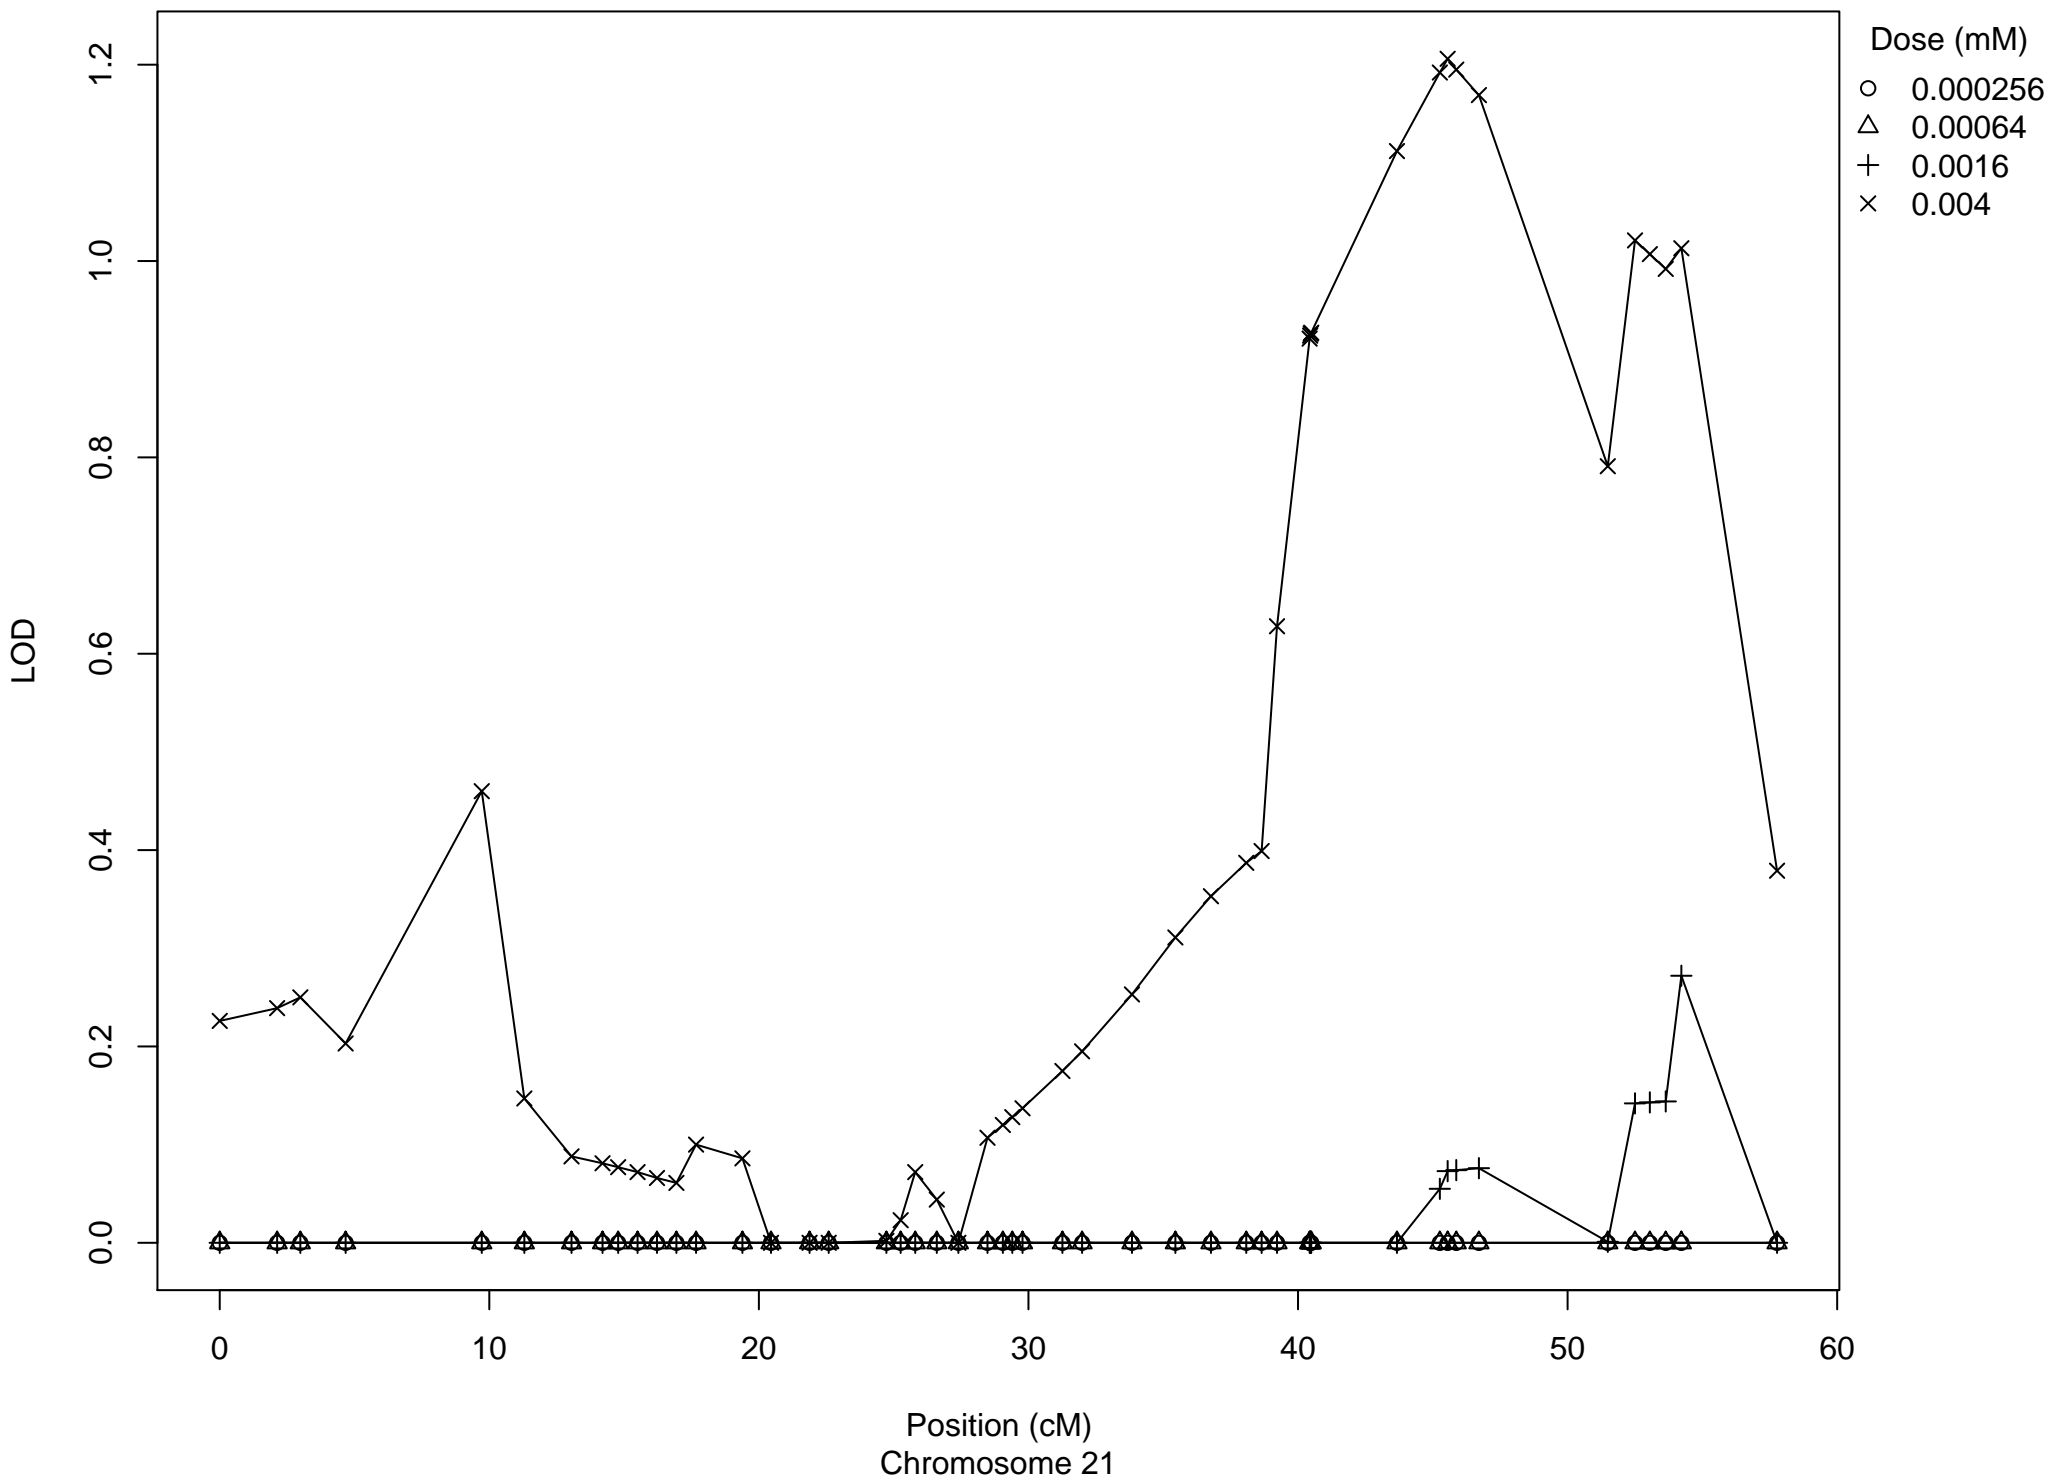

# Teniposide (Teni)

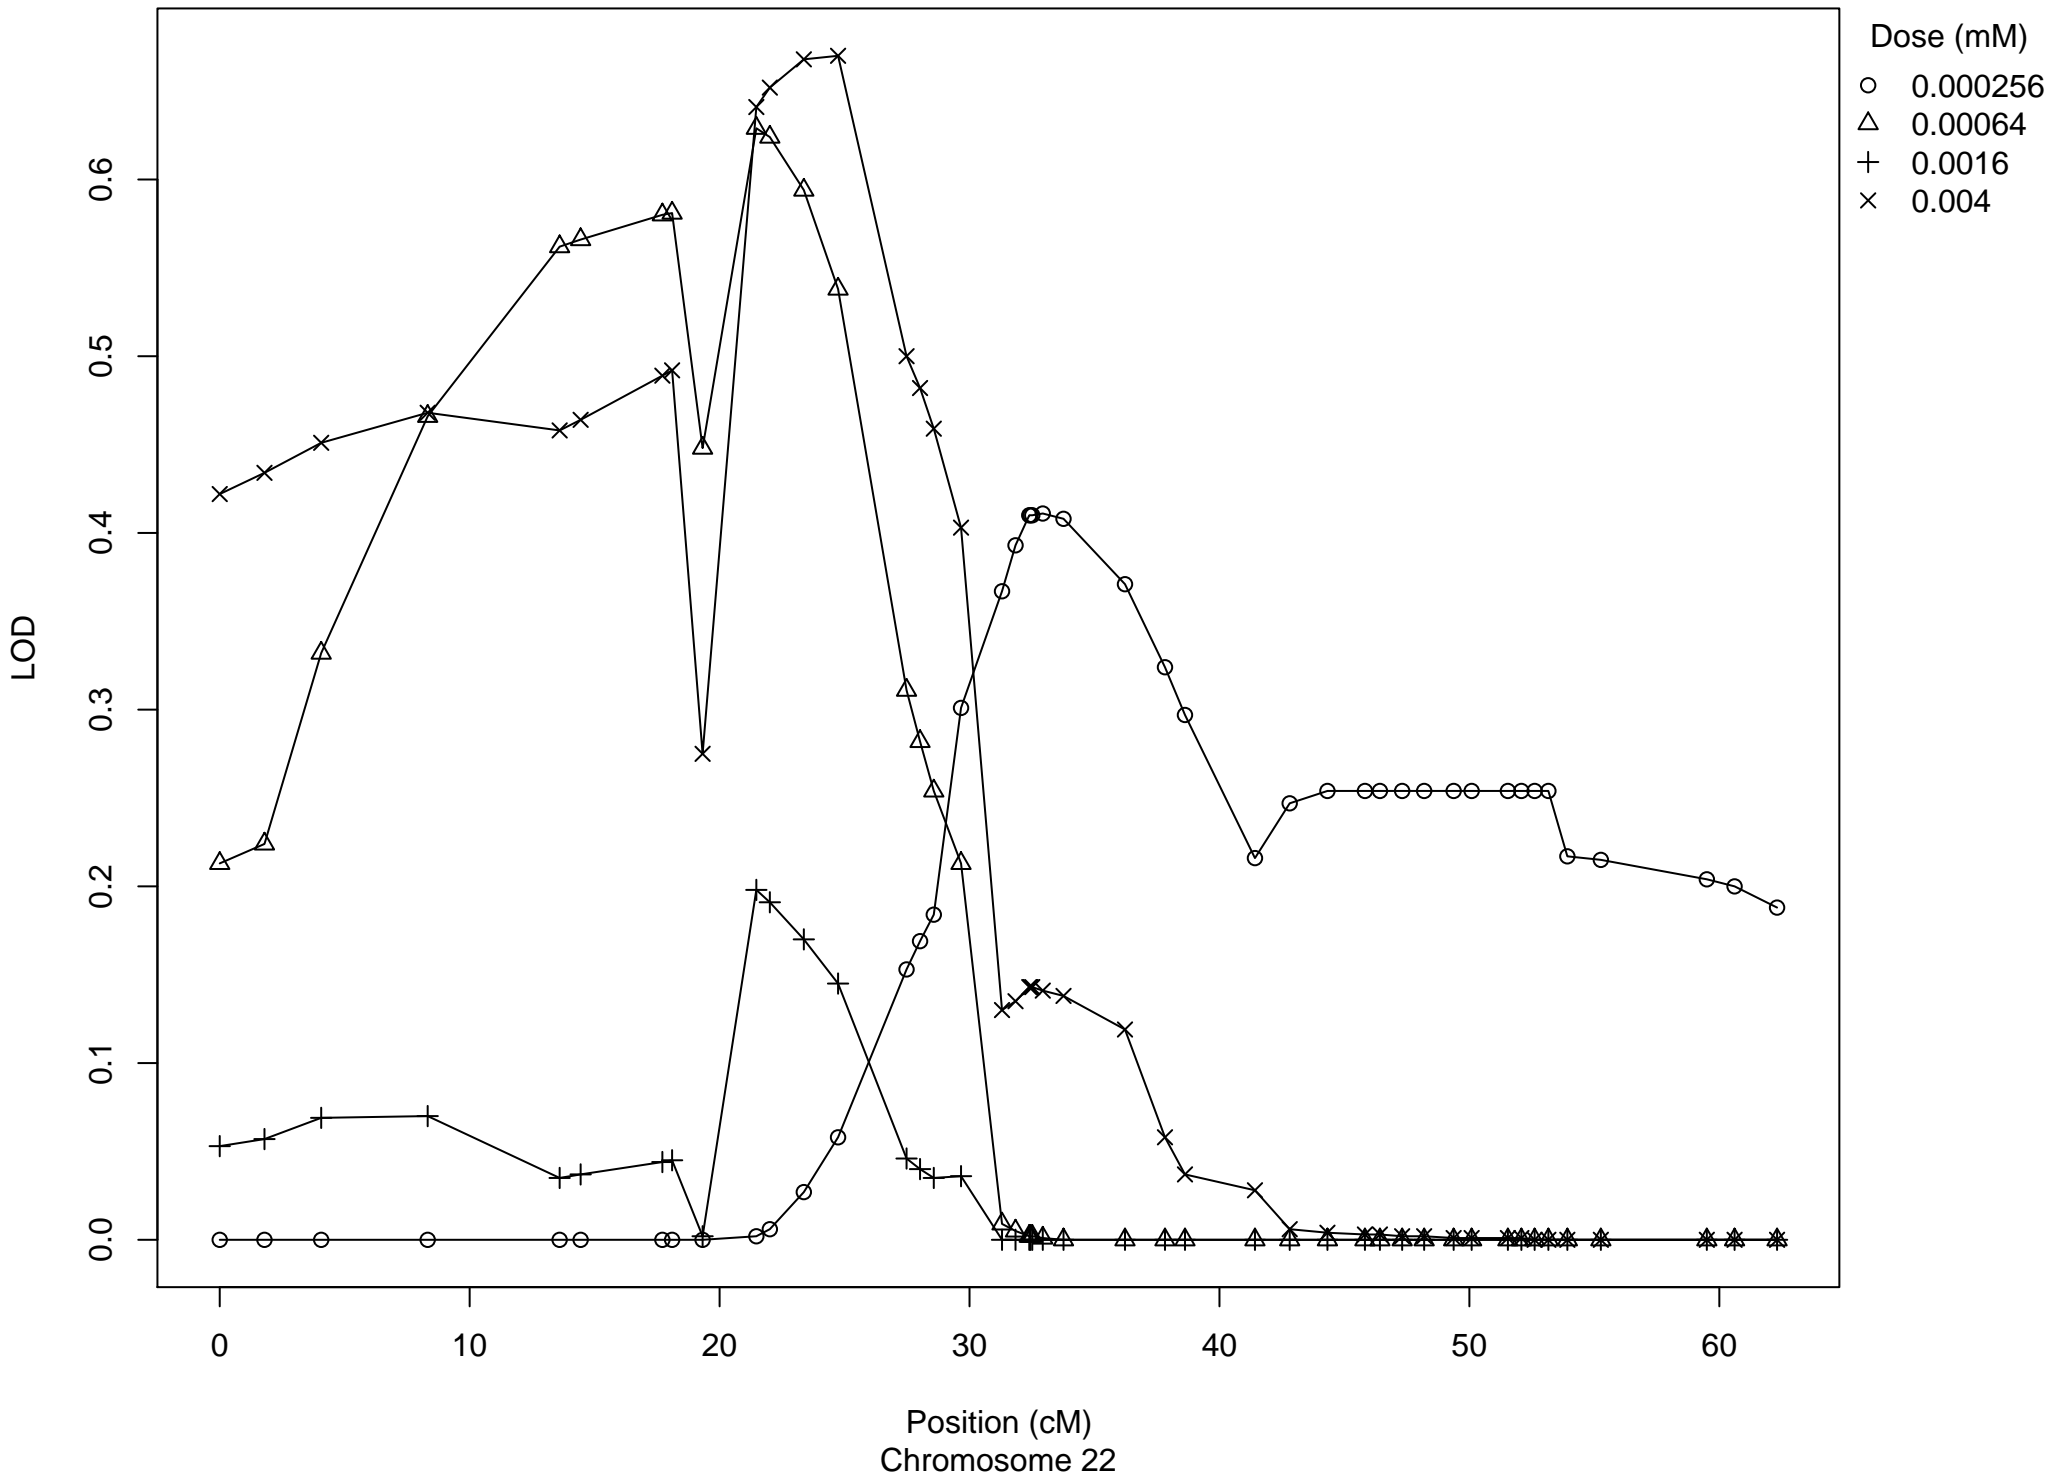

# Topotecan (Topo)

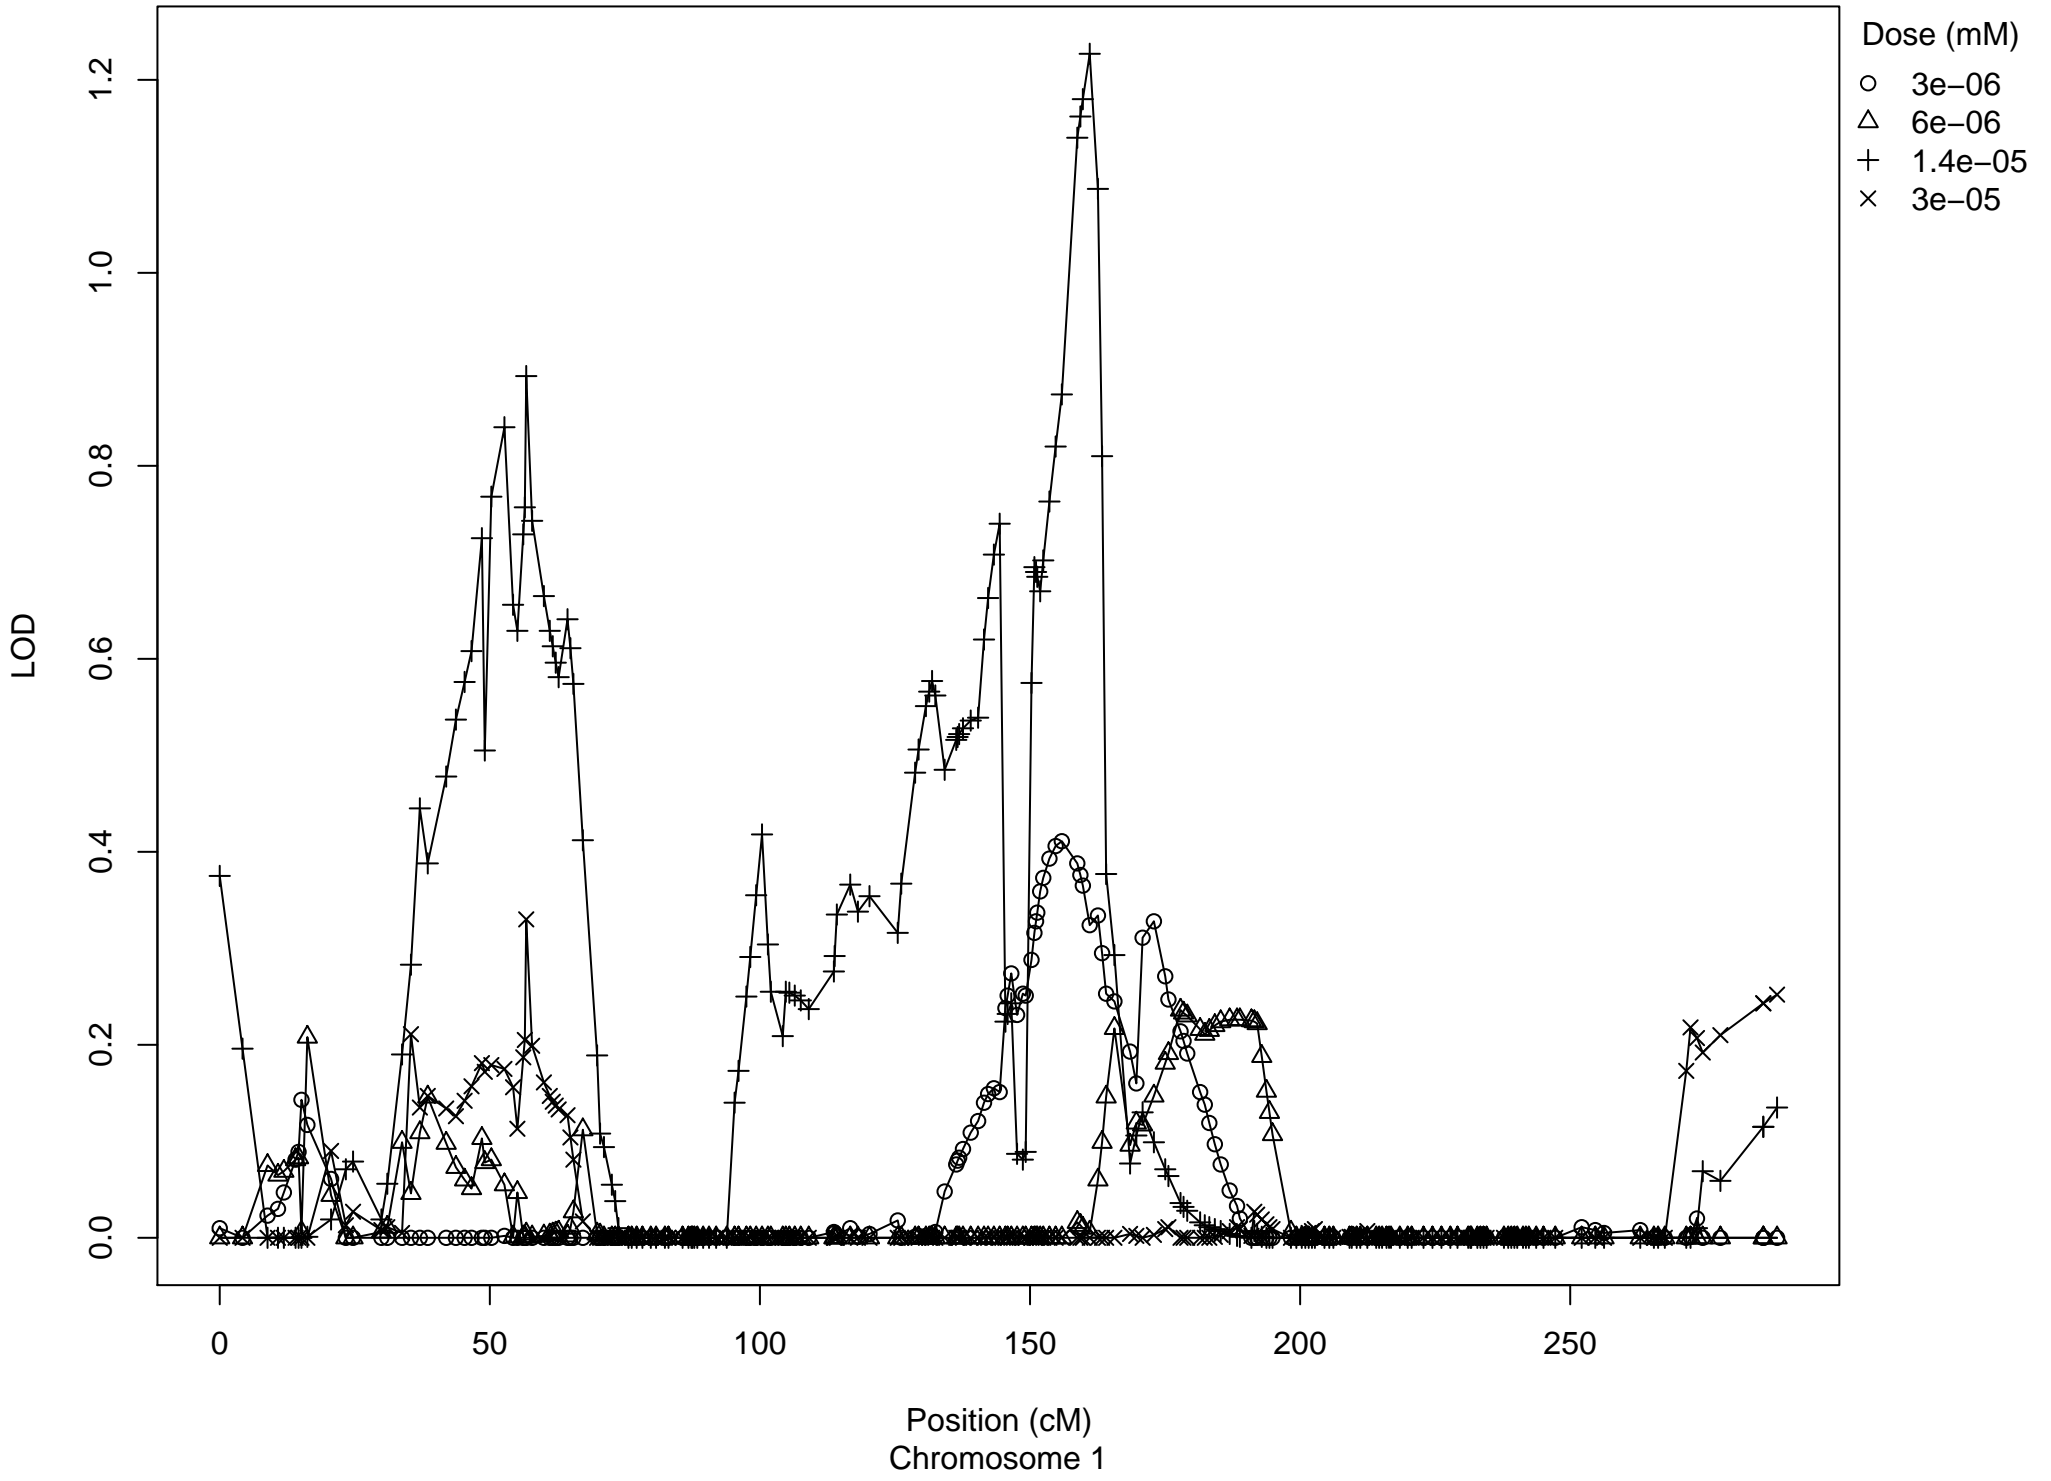

# Topotecan (Topo)

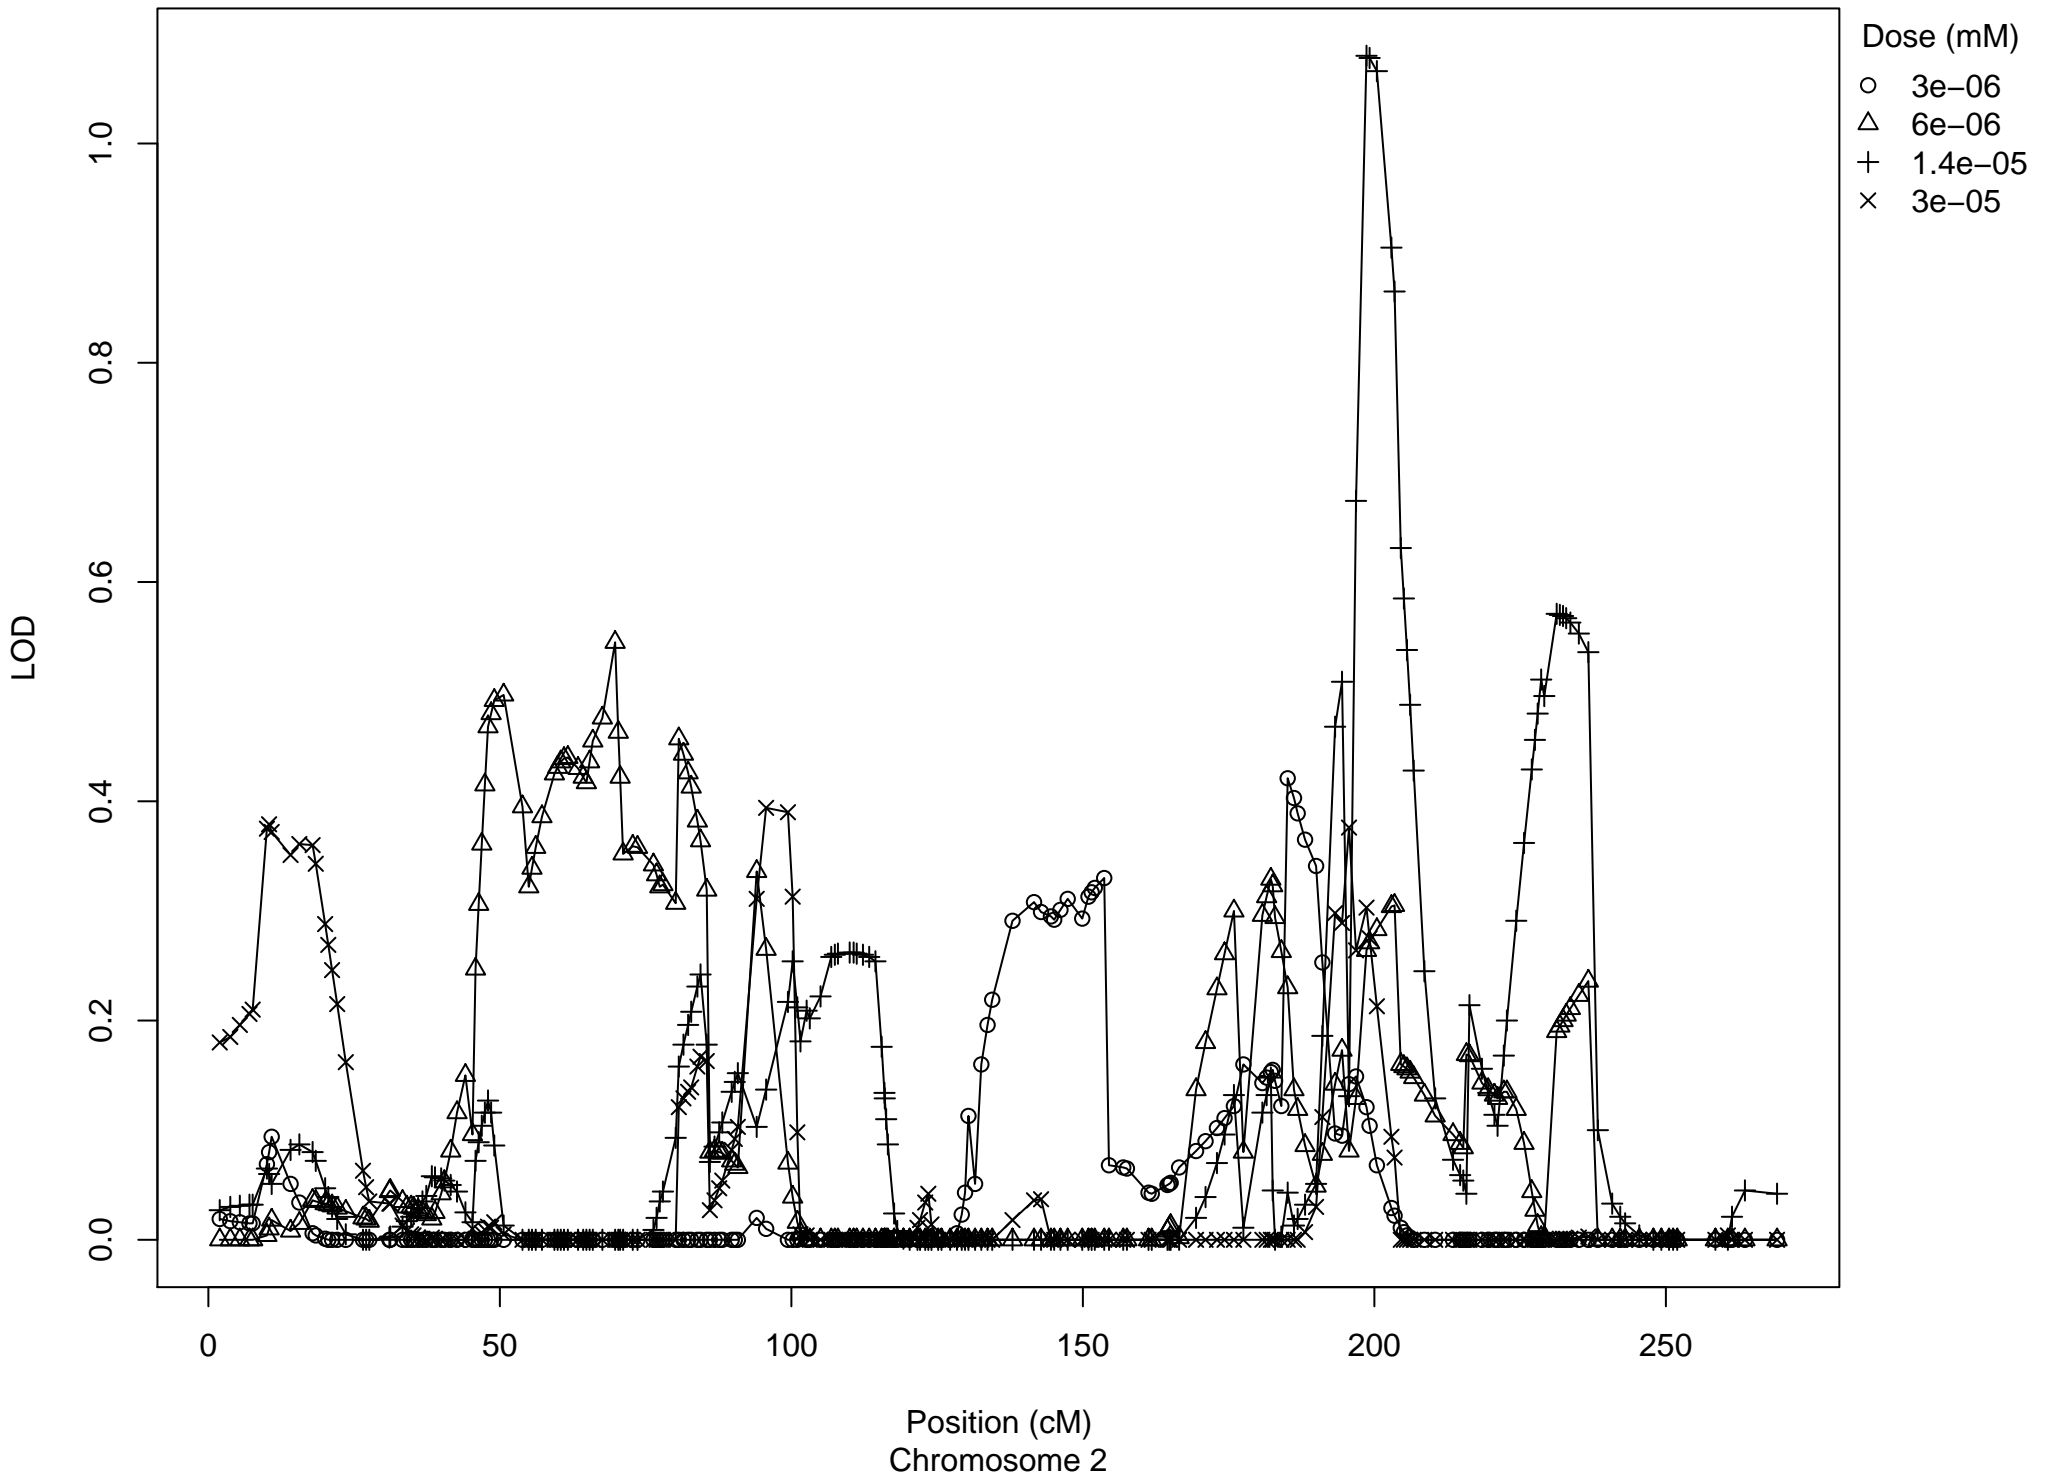



# Topotecan (Topo)

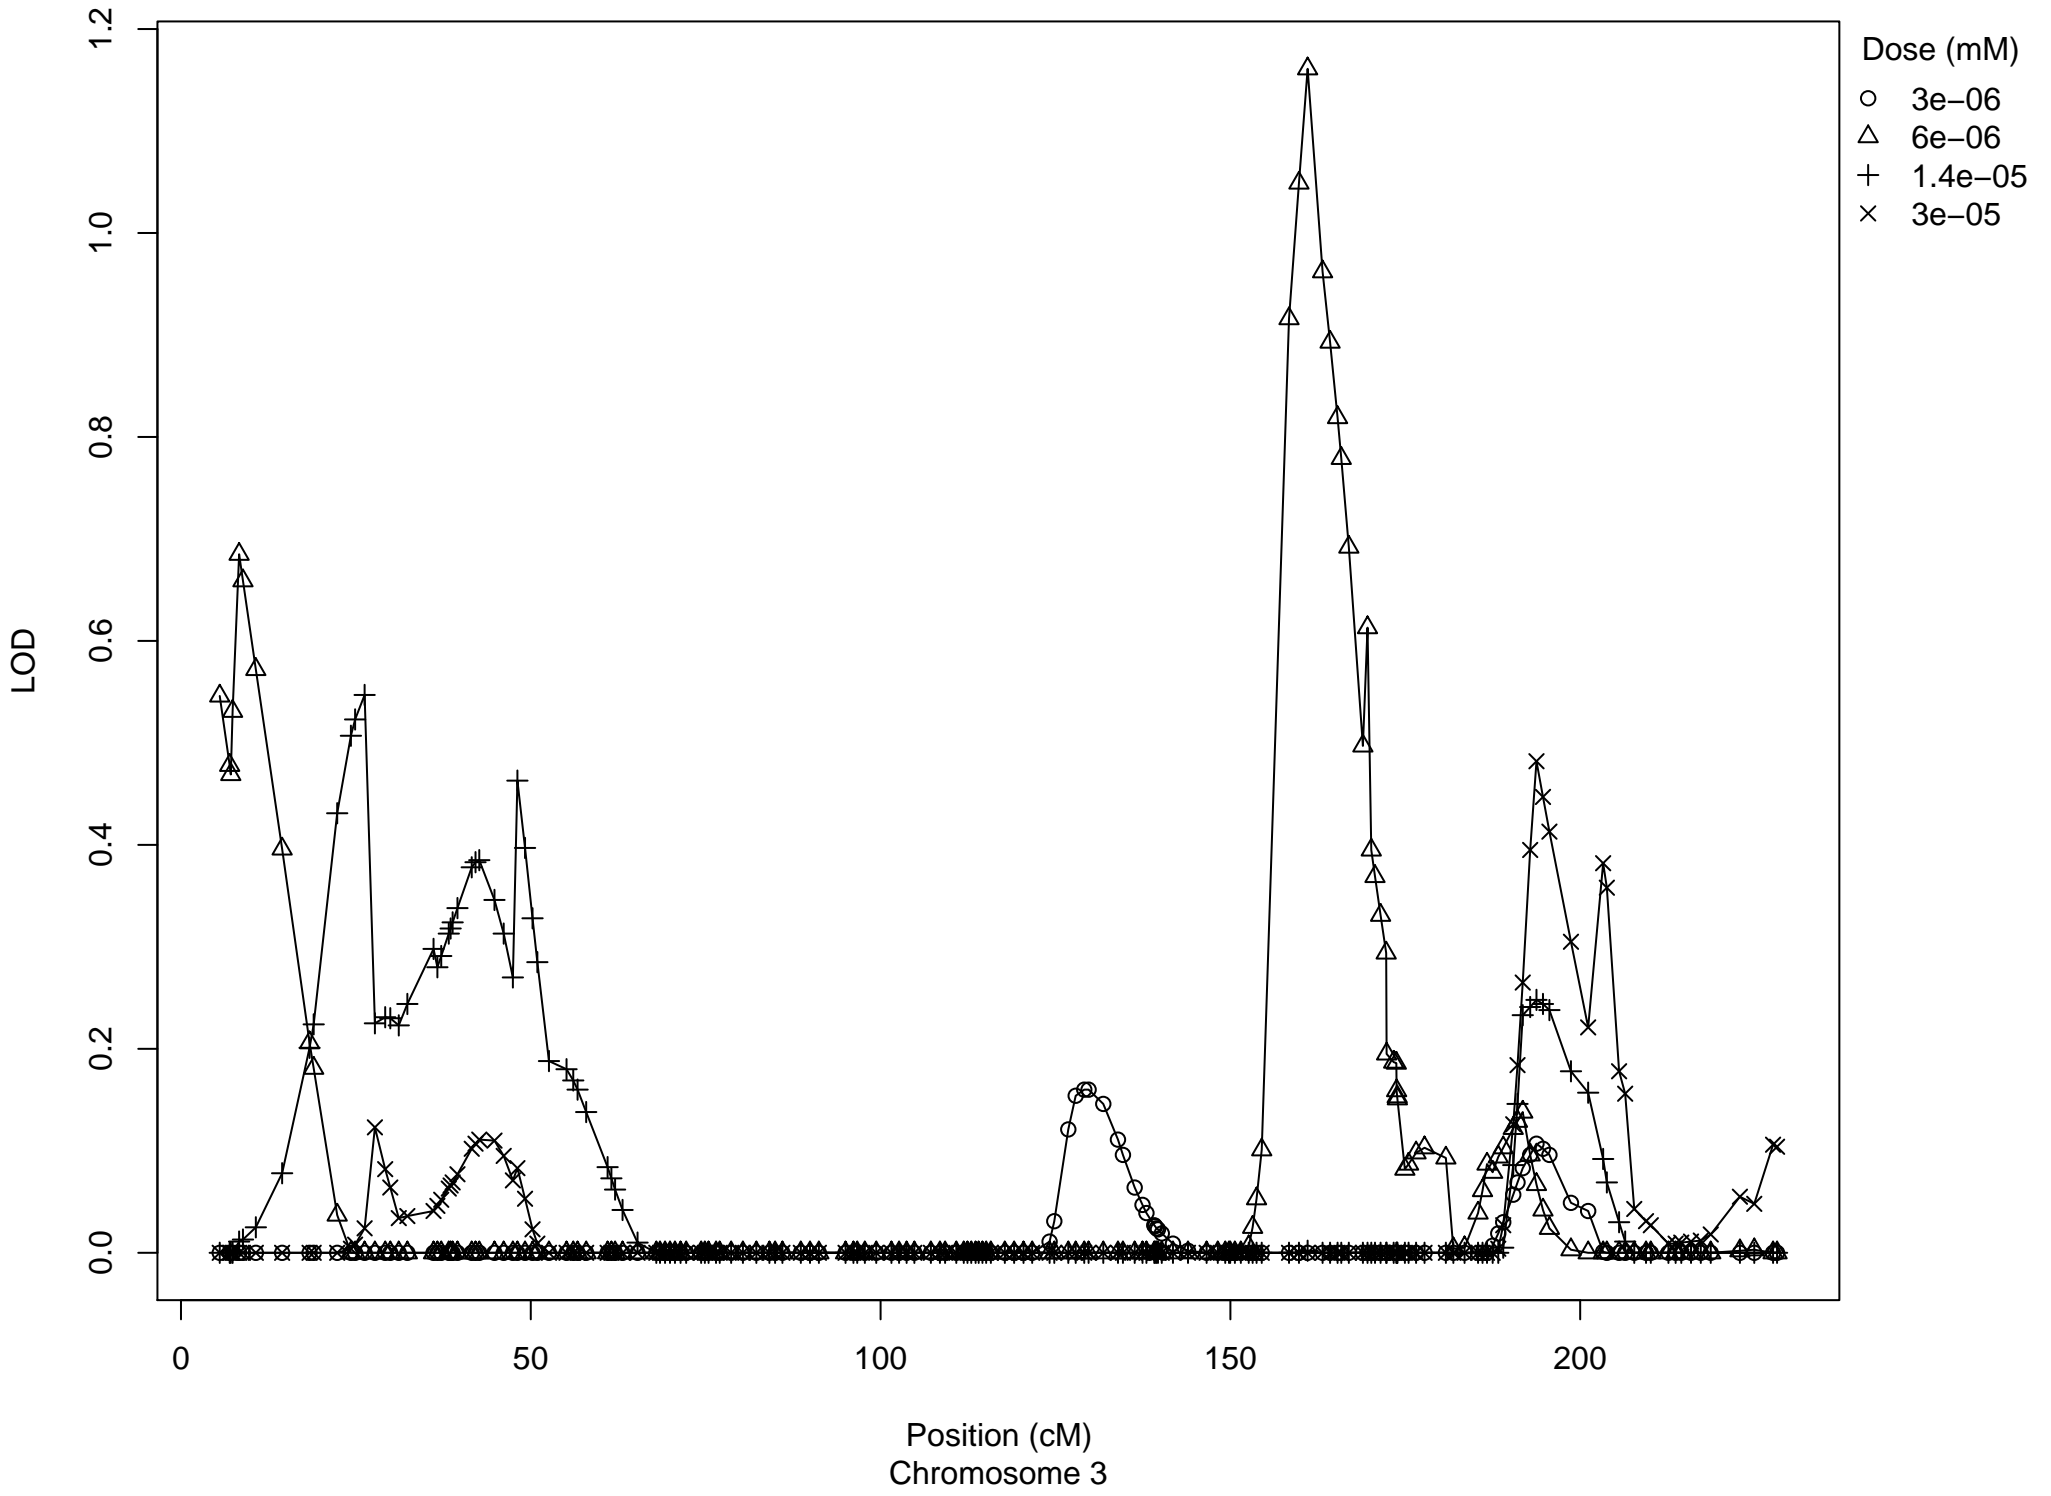

# Topotecan (Topo)

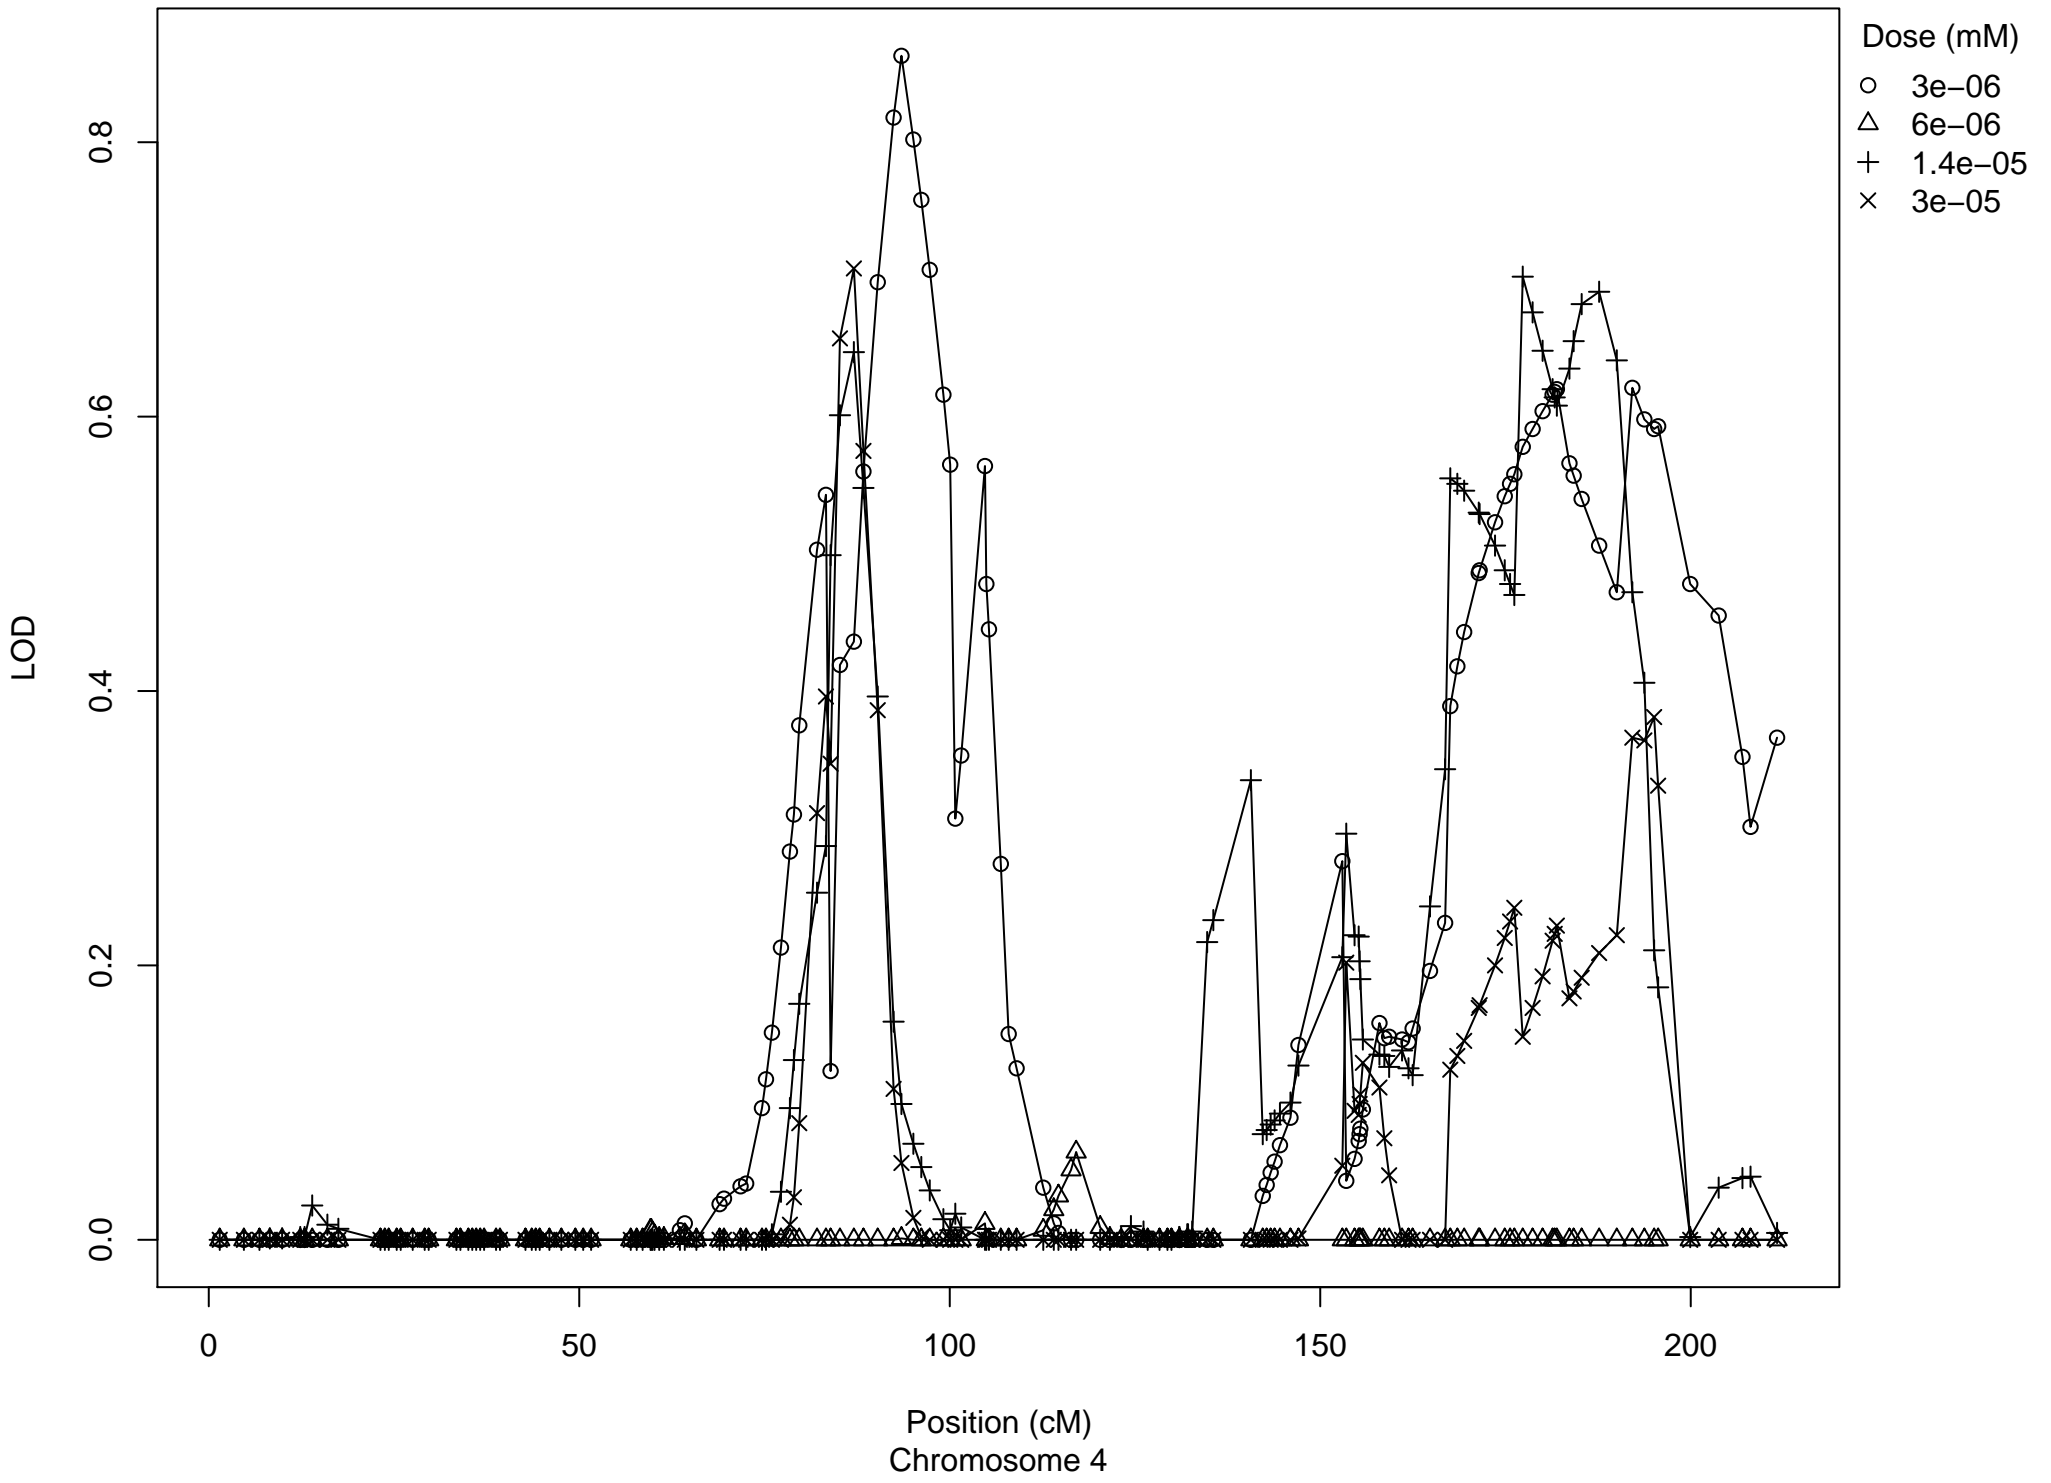

# Topotecan (Topo)

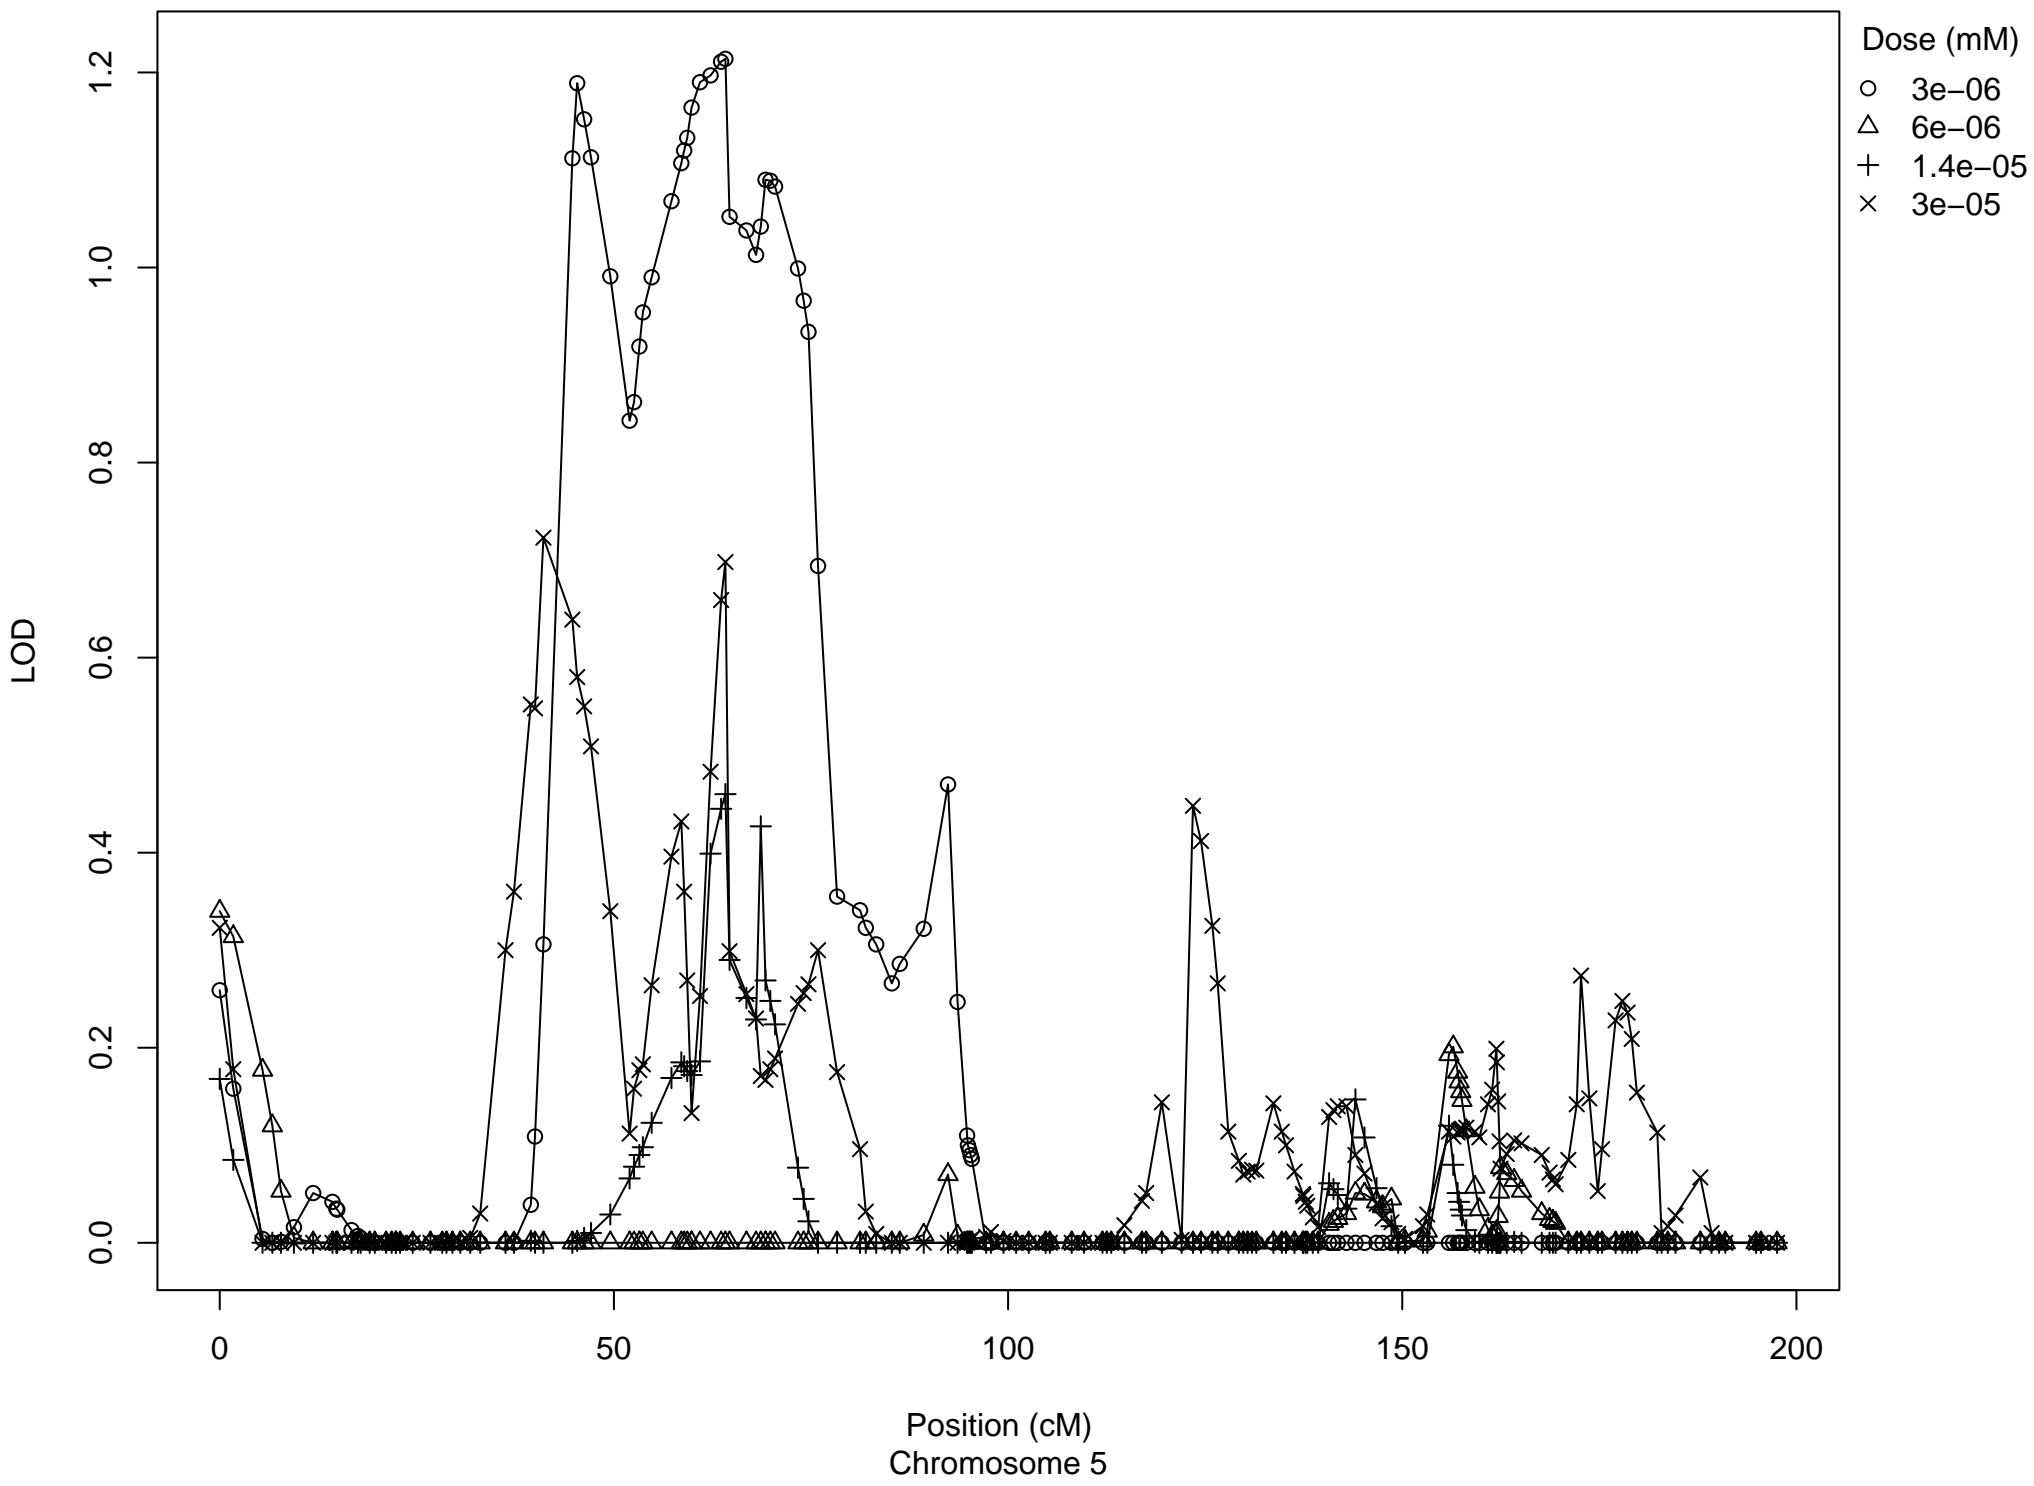

# Topotecan (Topo)

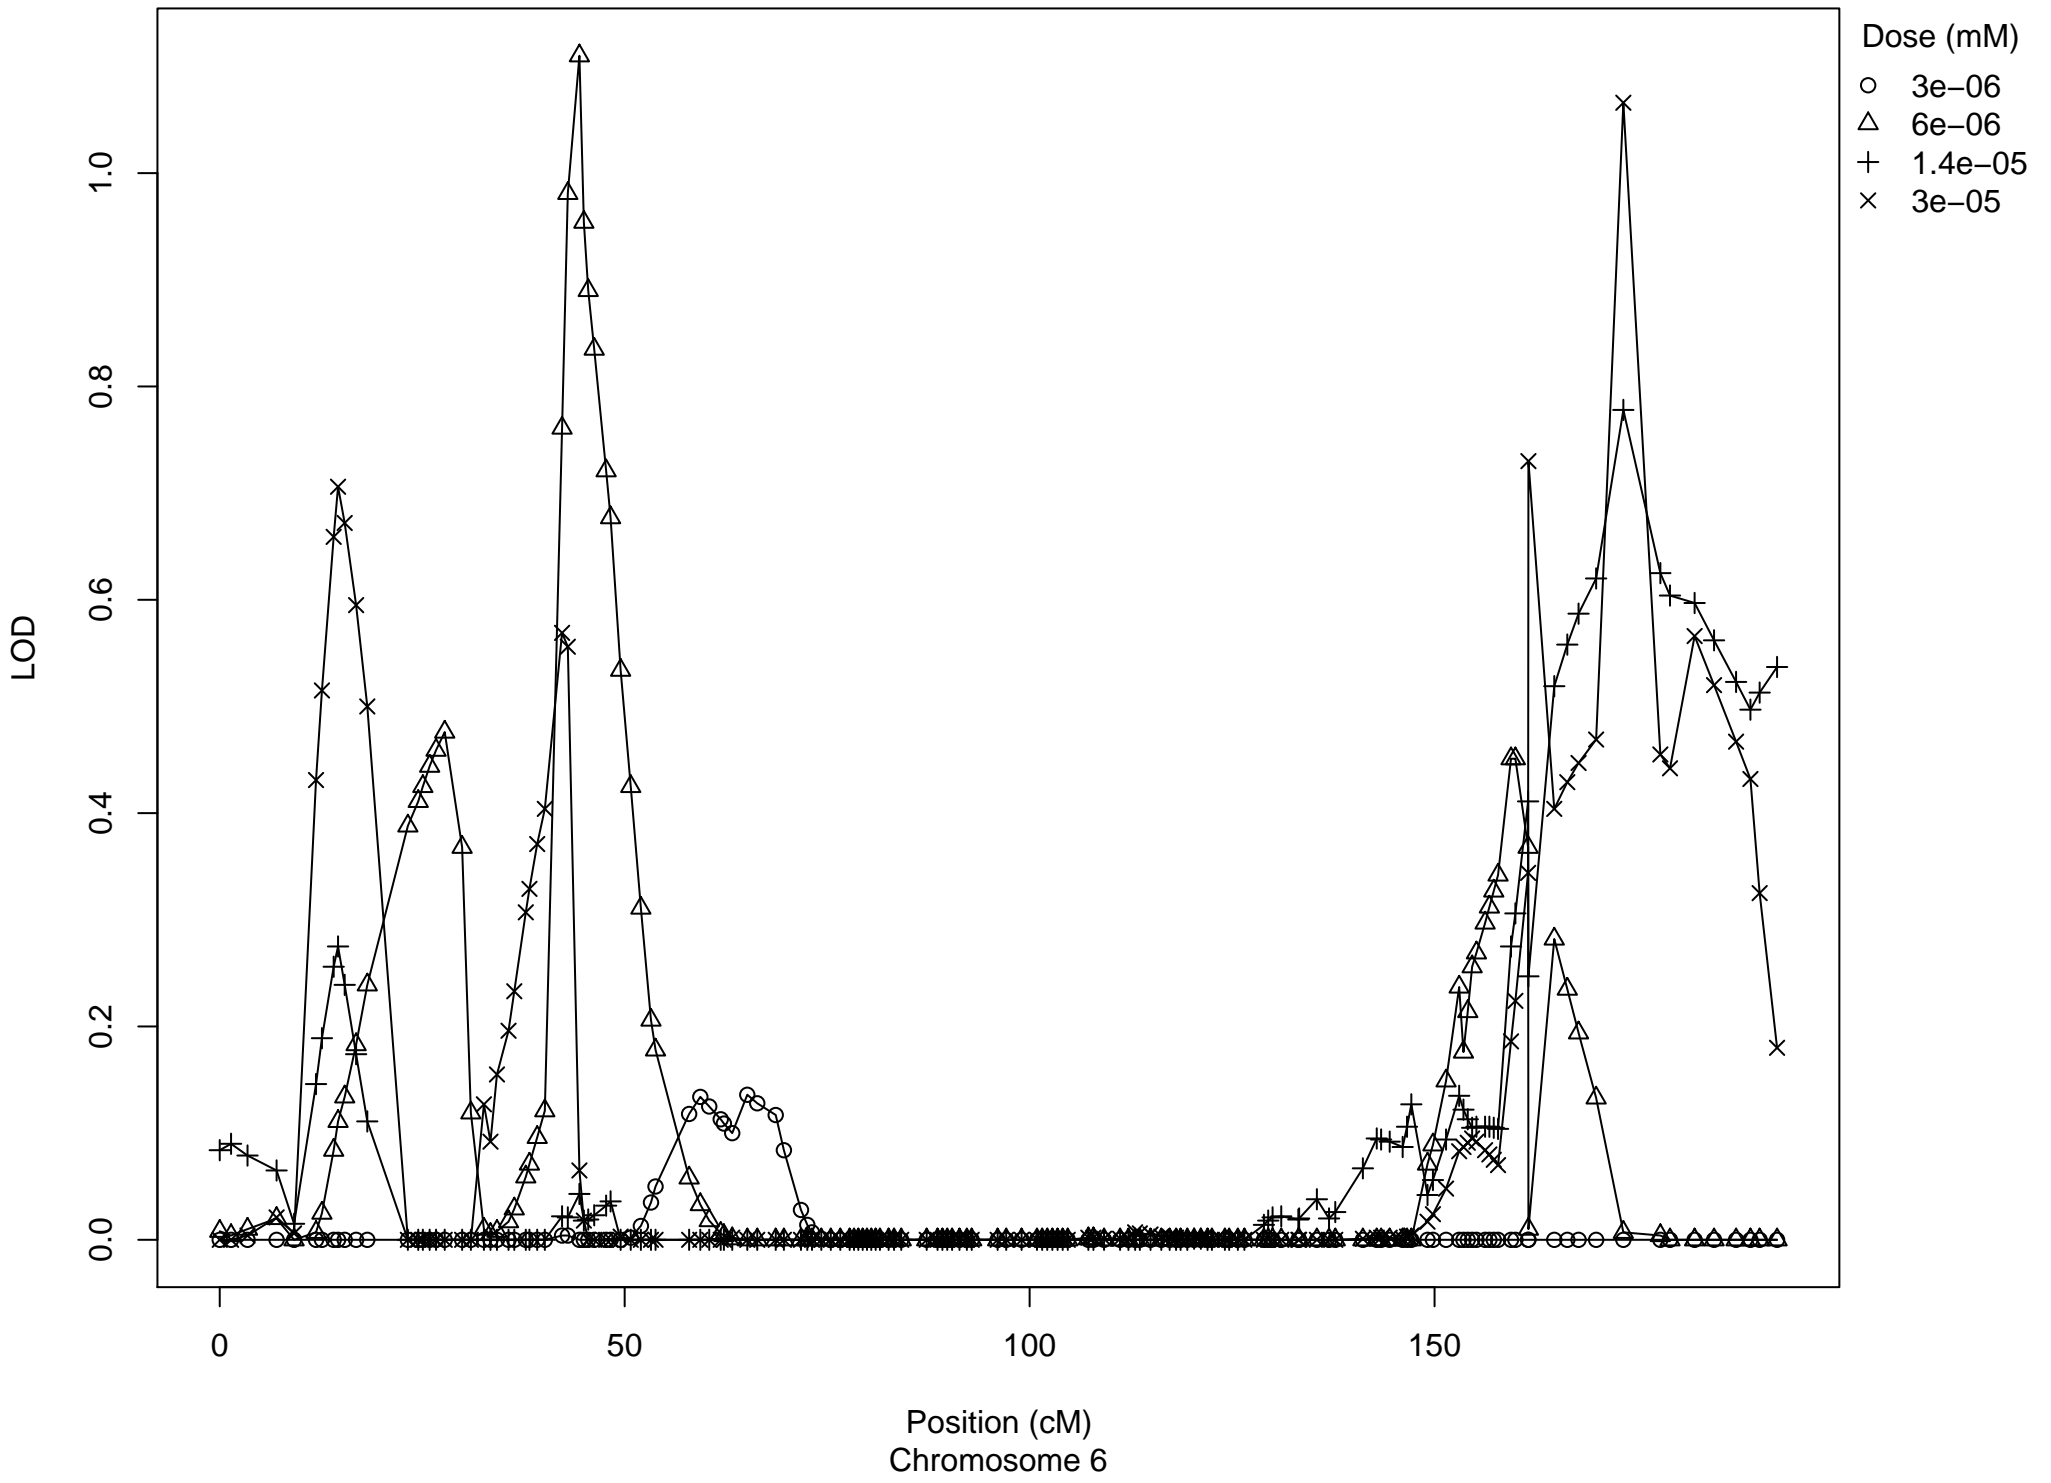

# Topotecan (Topo)

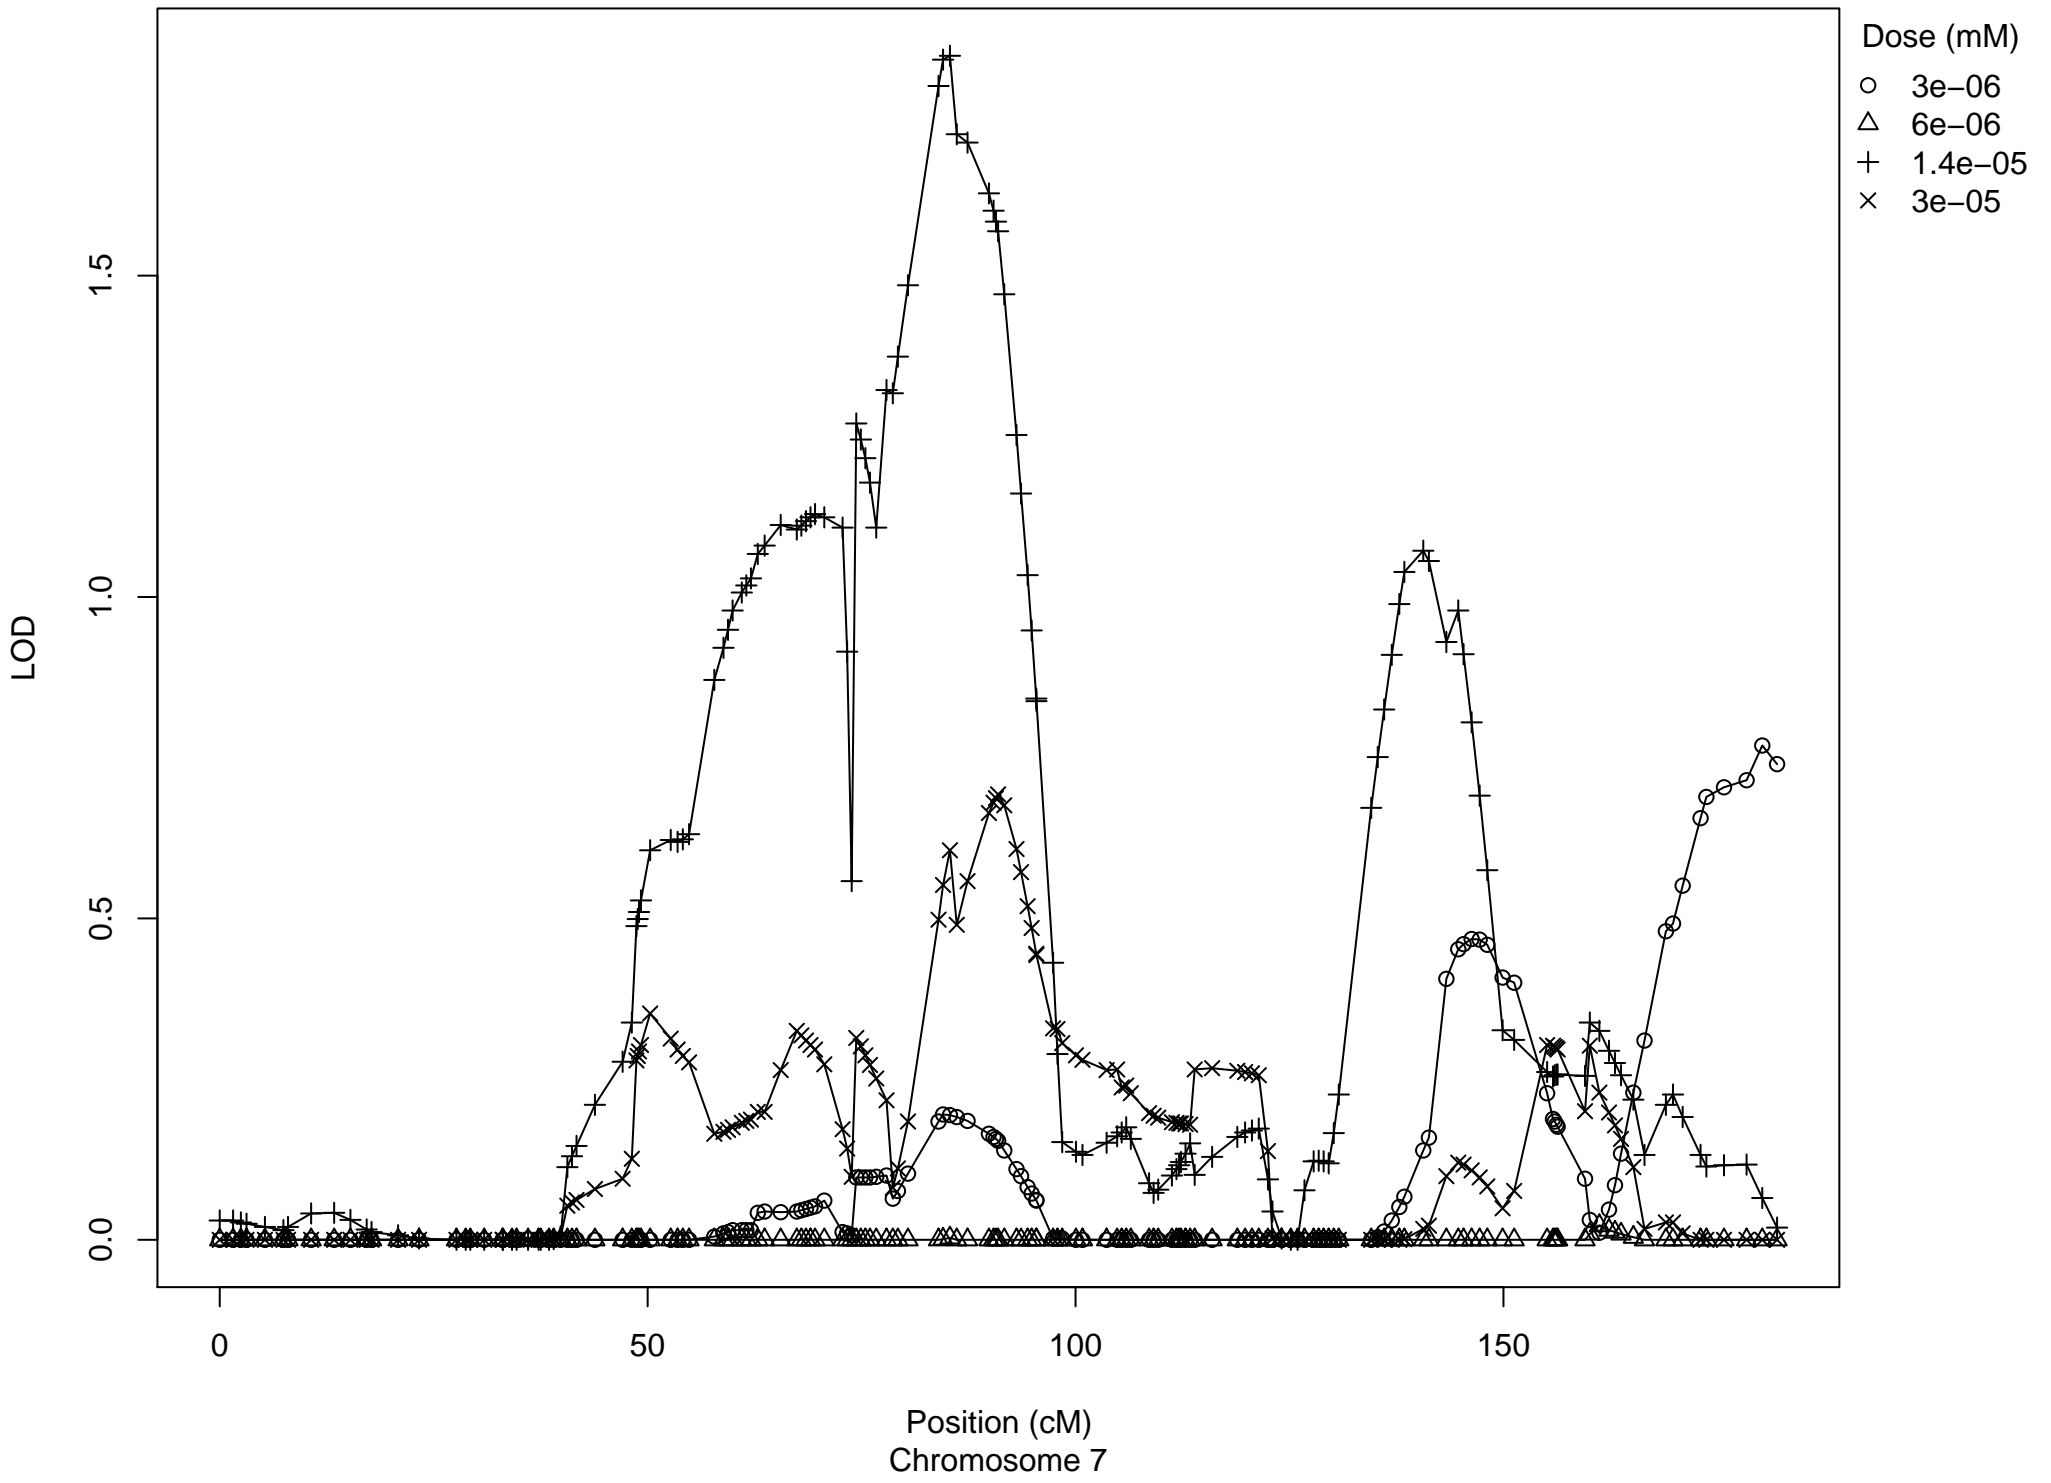

# Topotecan (Topo)

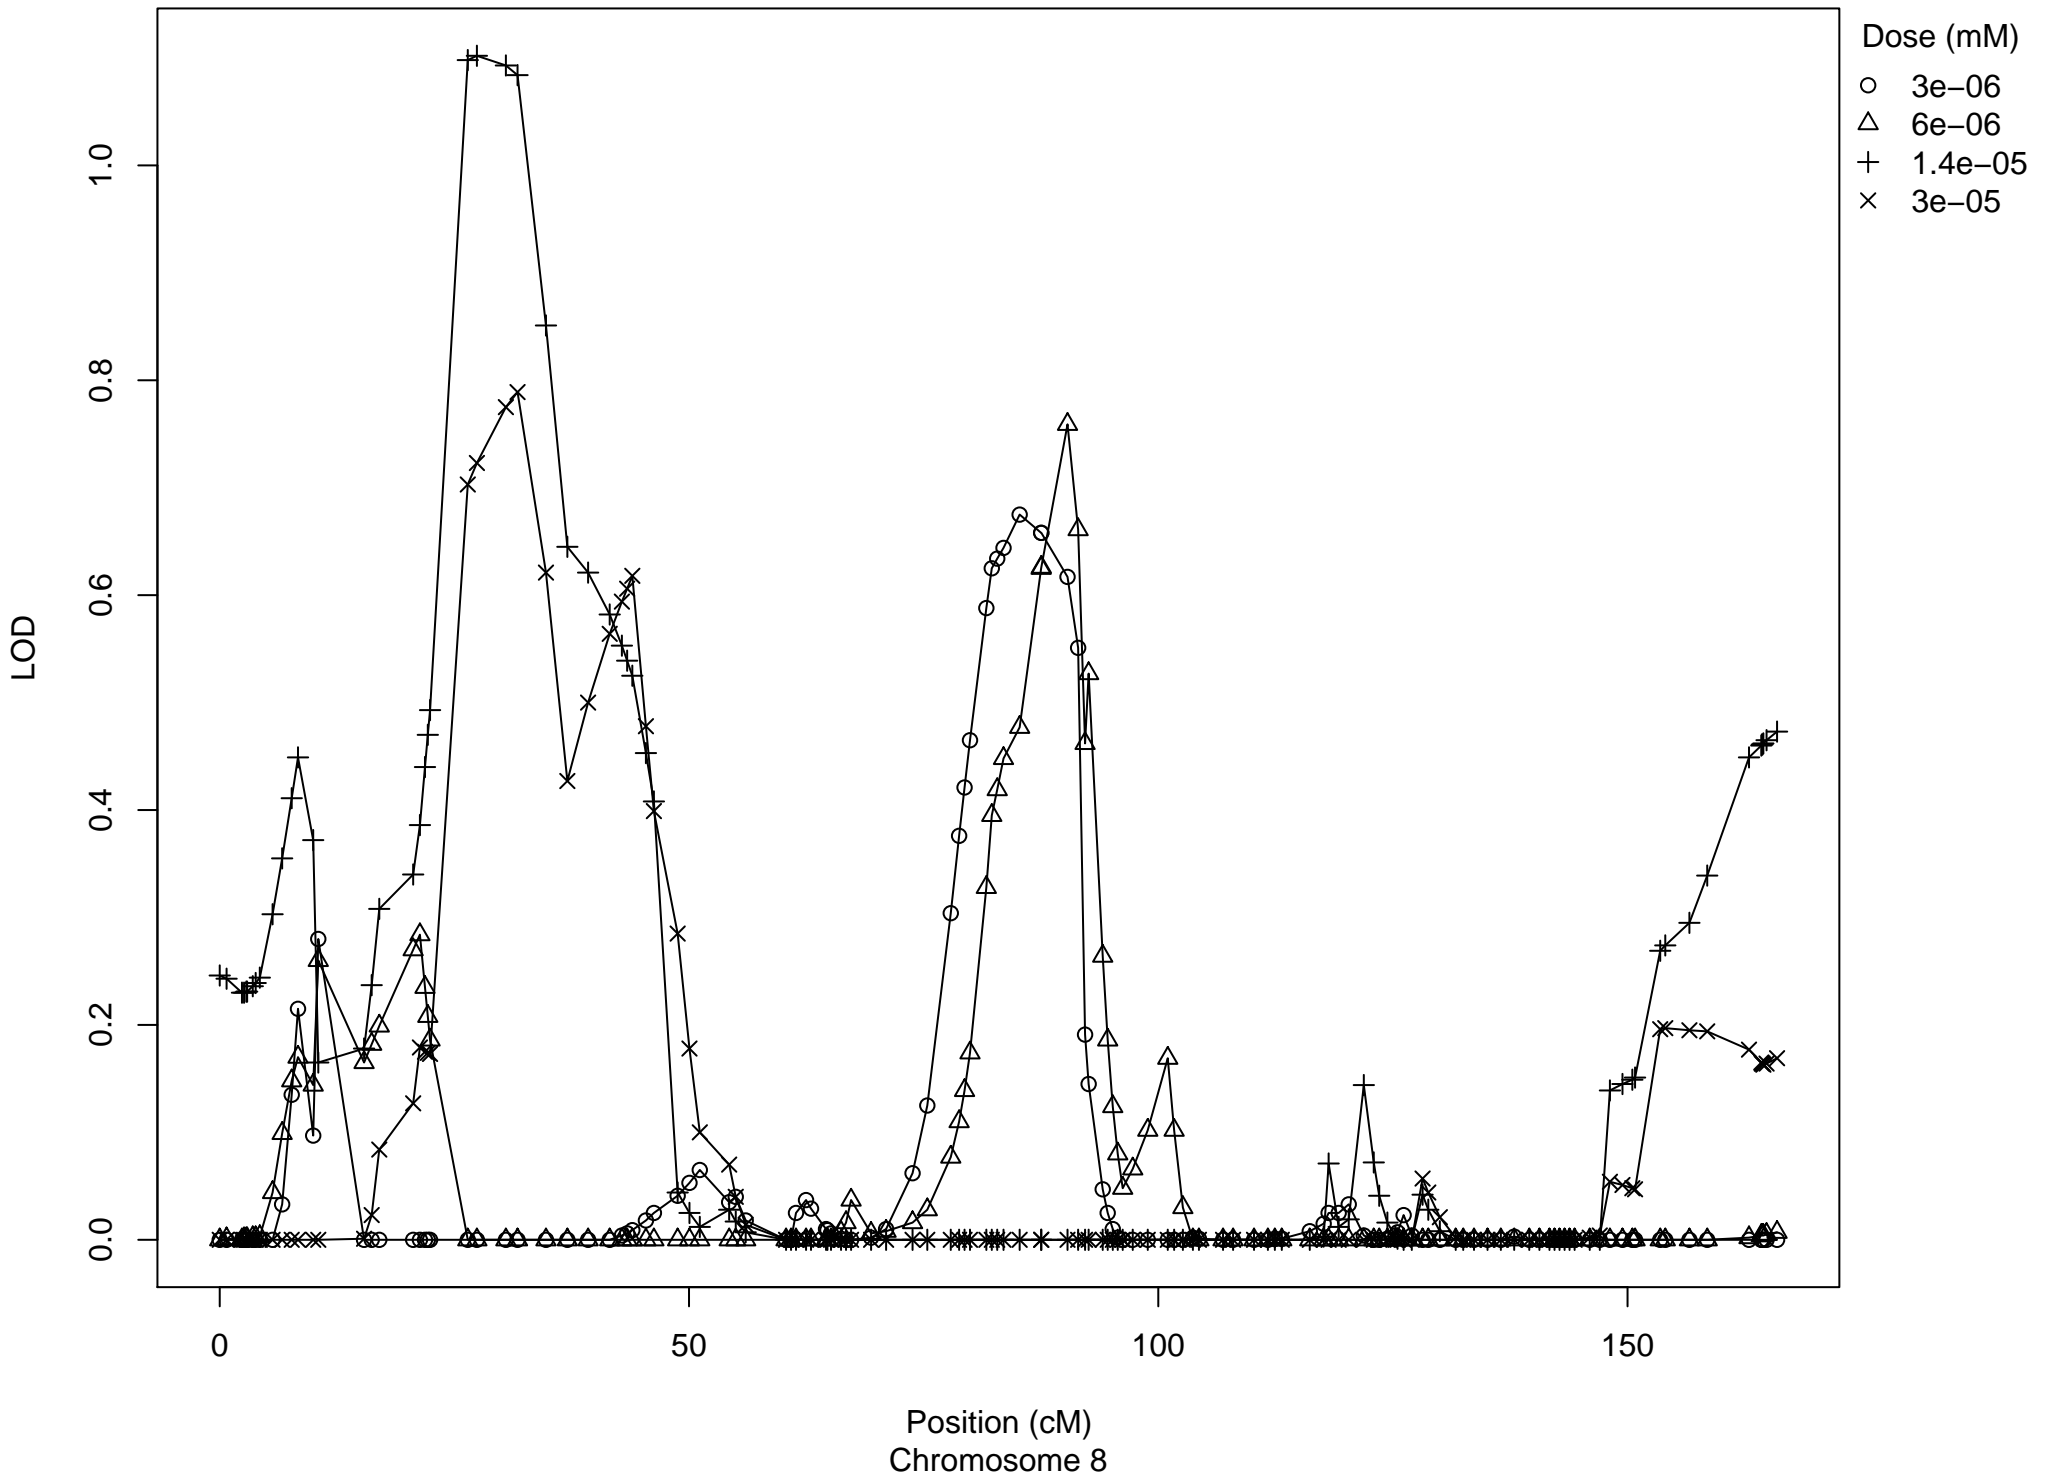

# Topotecan (Topo)

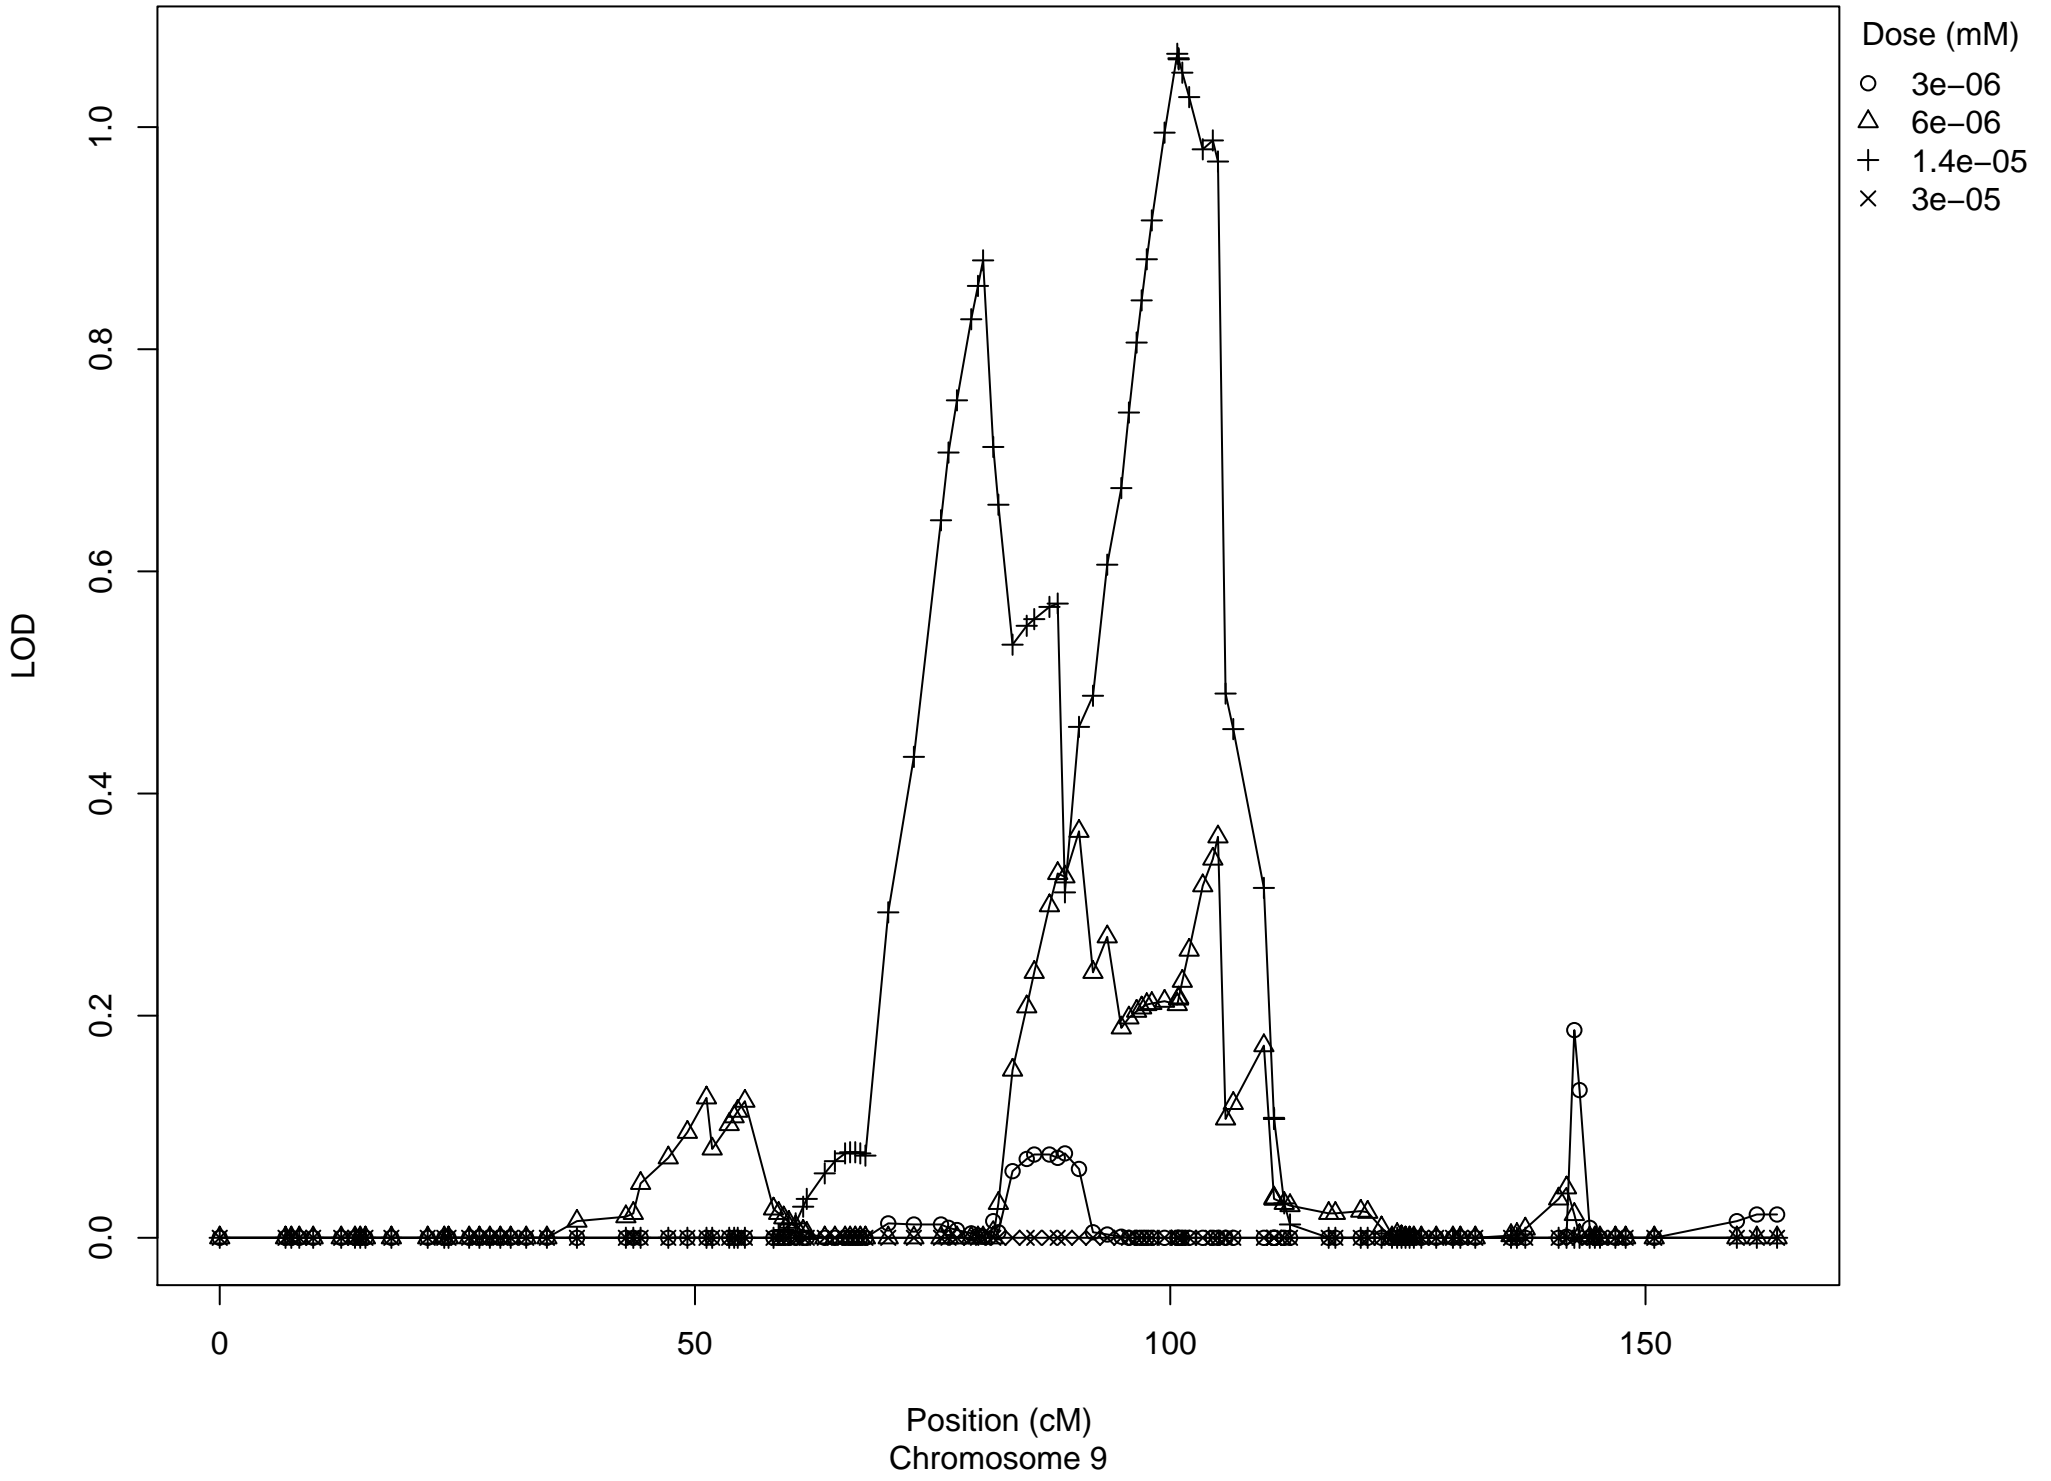

# Topotecan (Topo)

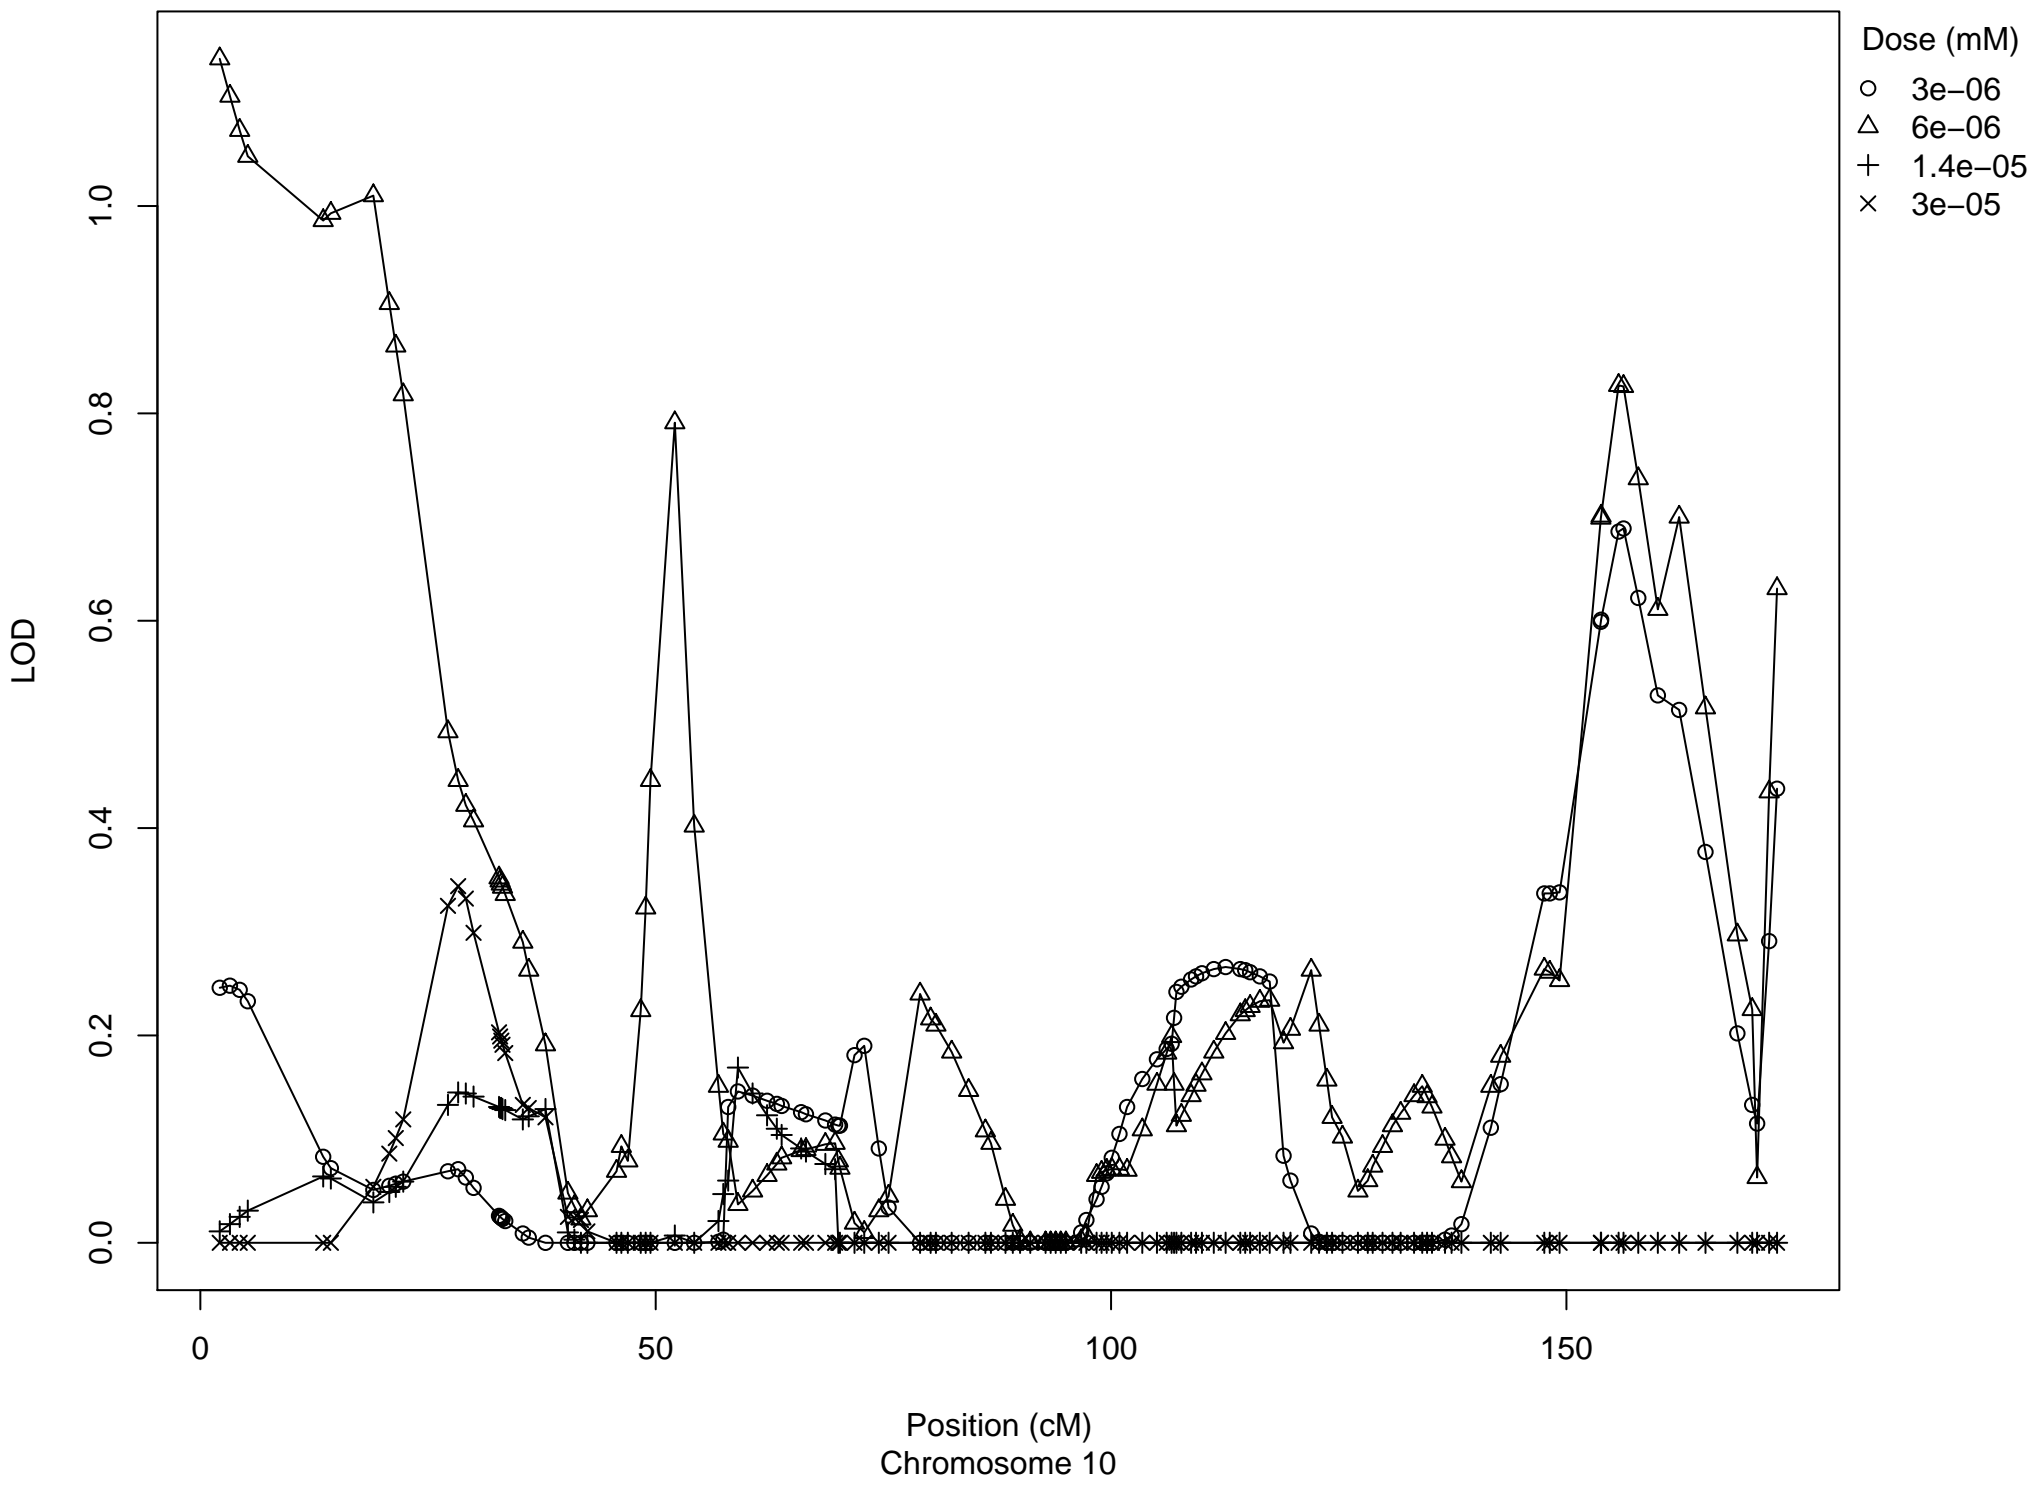



# Topotecan (Topo)

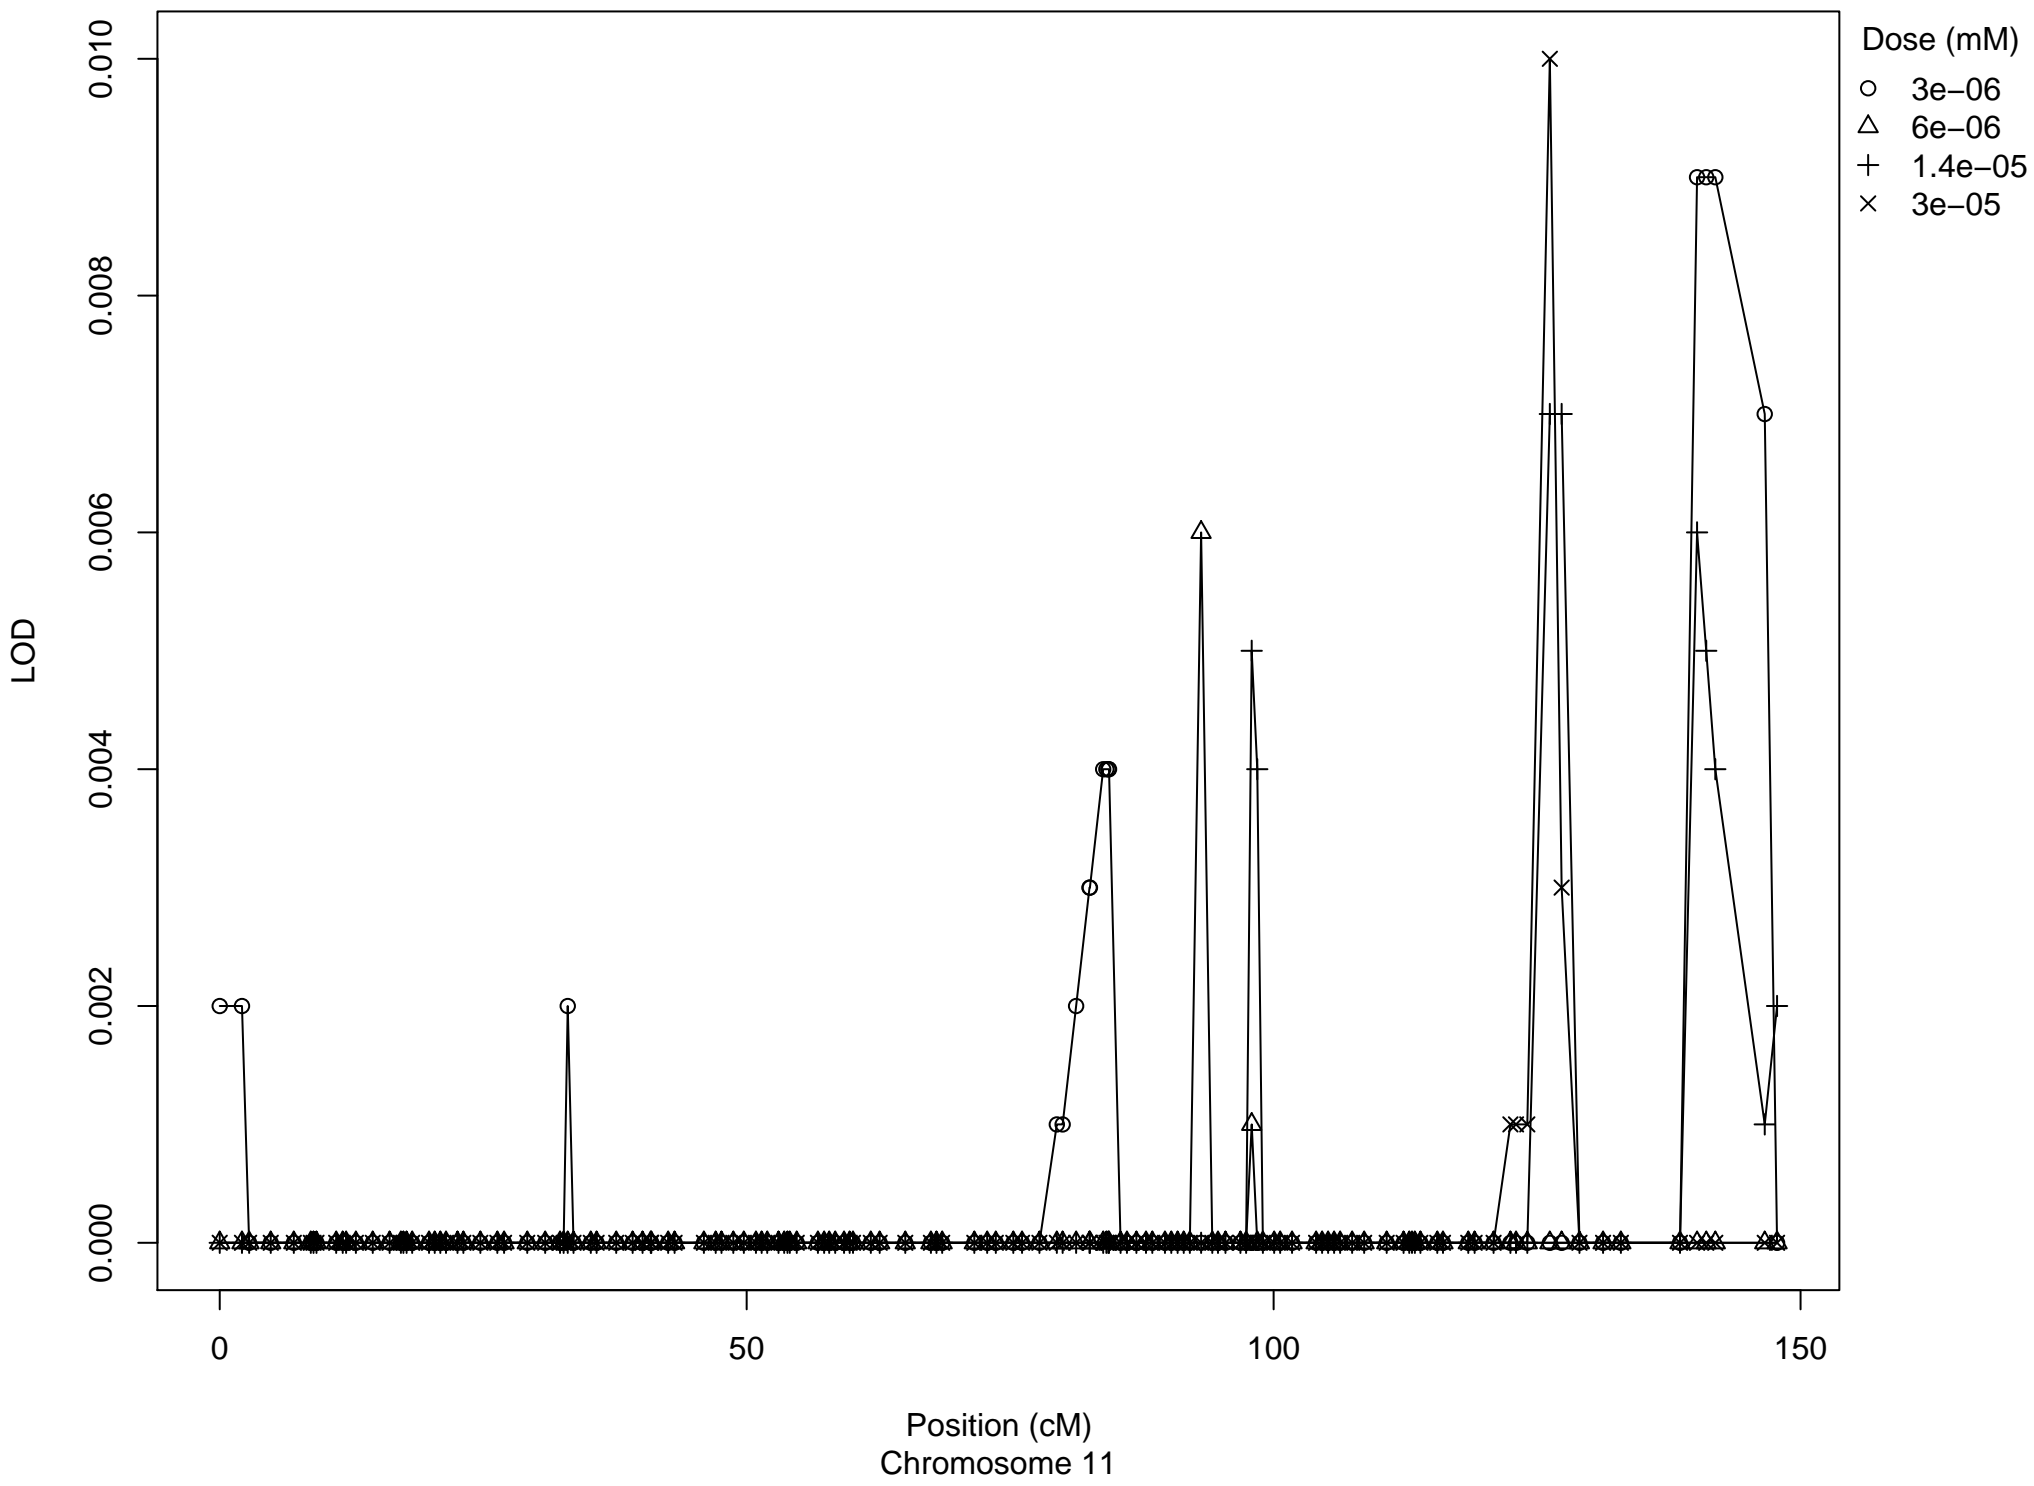

# Topotecan (Topo)

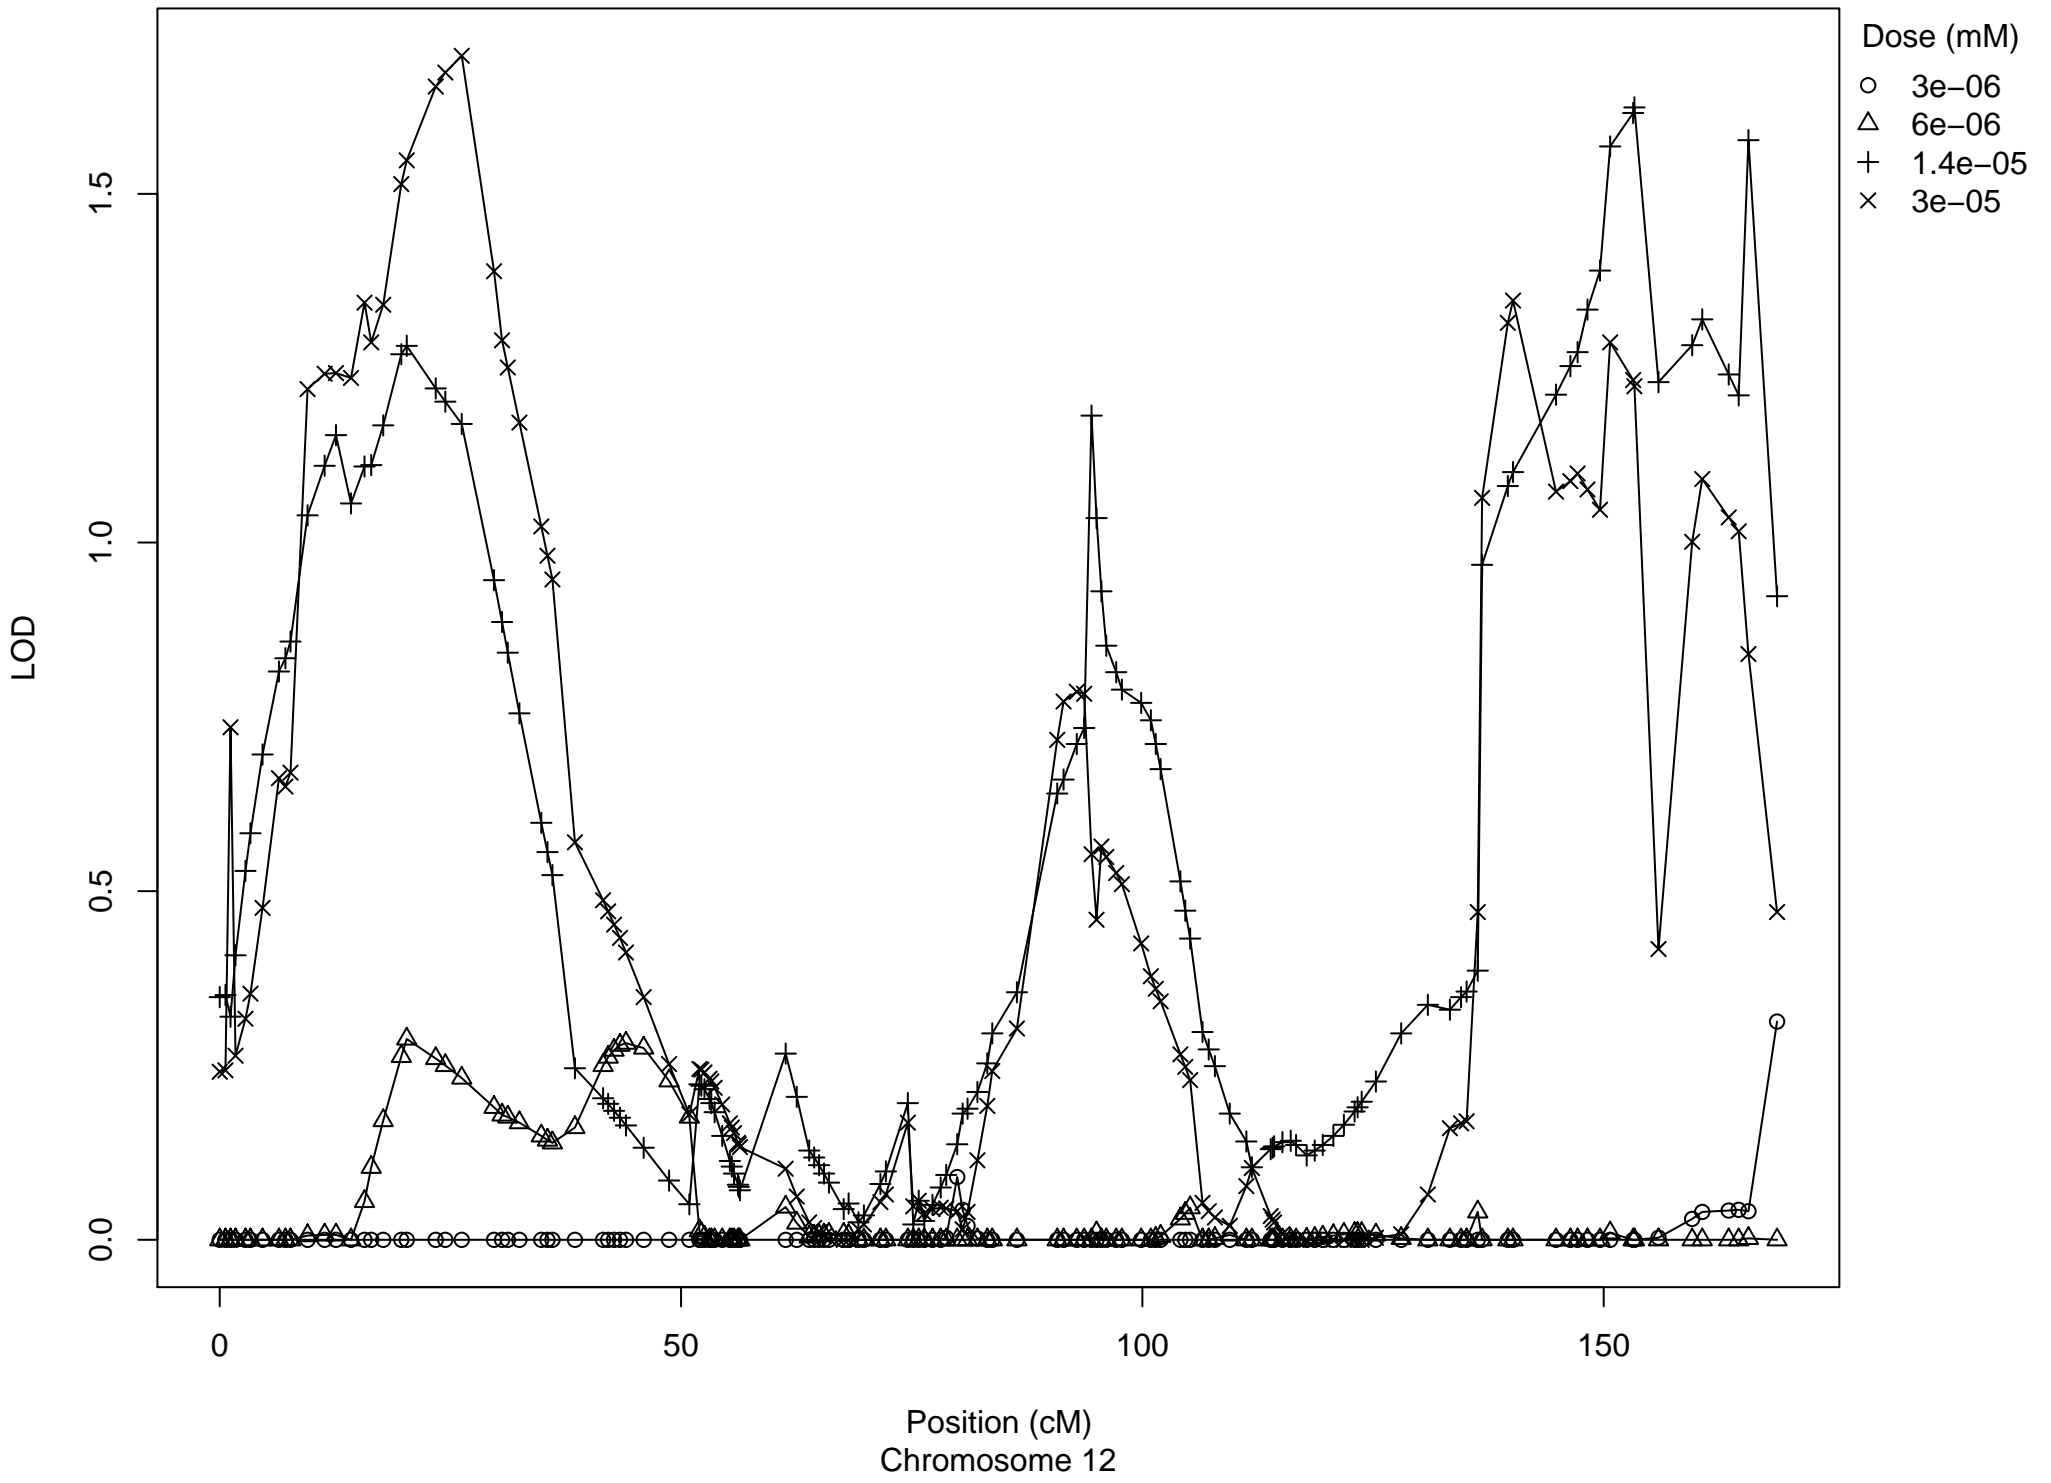

# Topotecan (Topo)

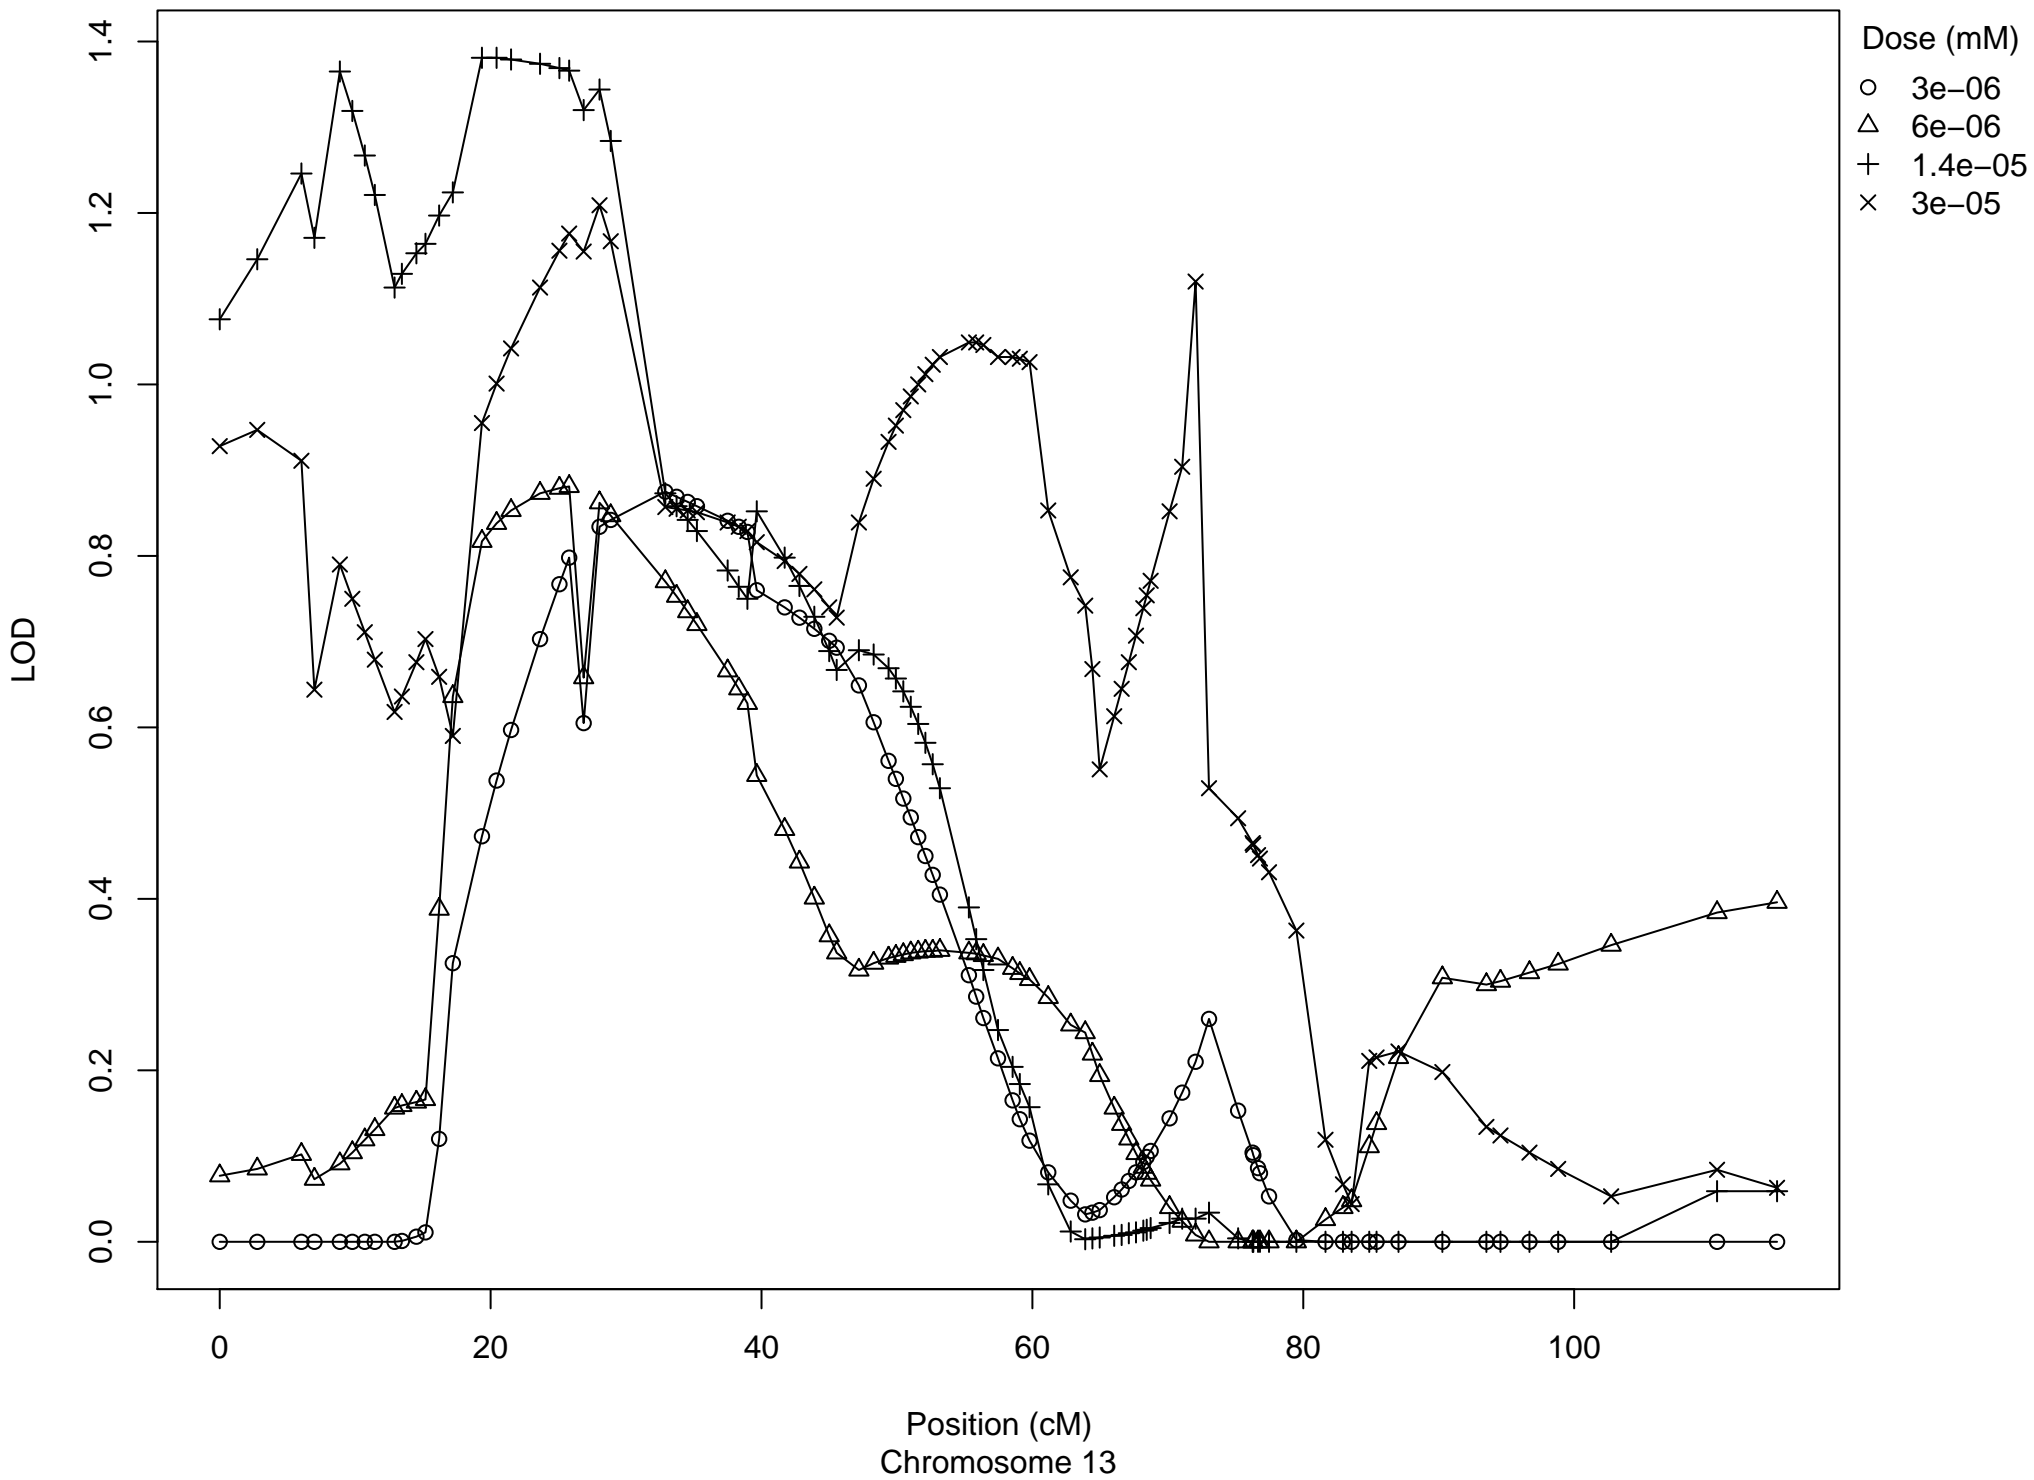

# Topotecan (Topo)

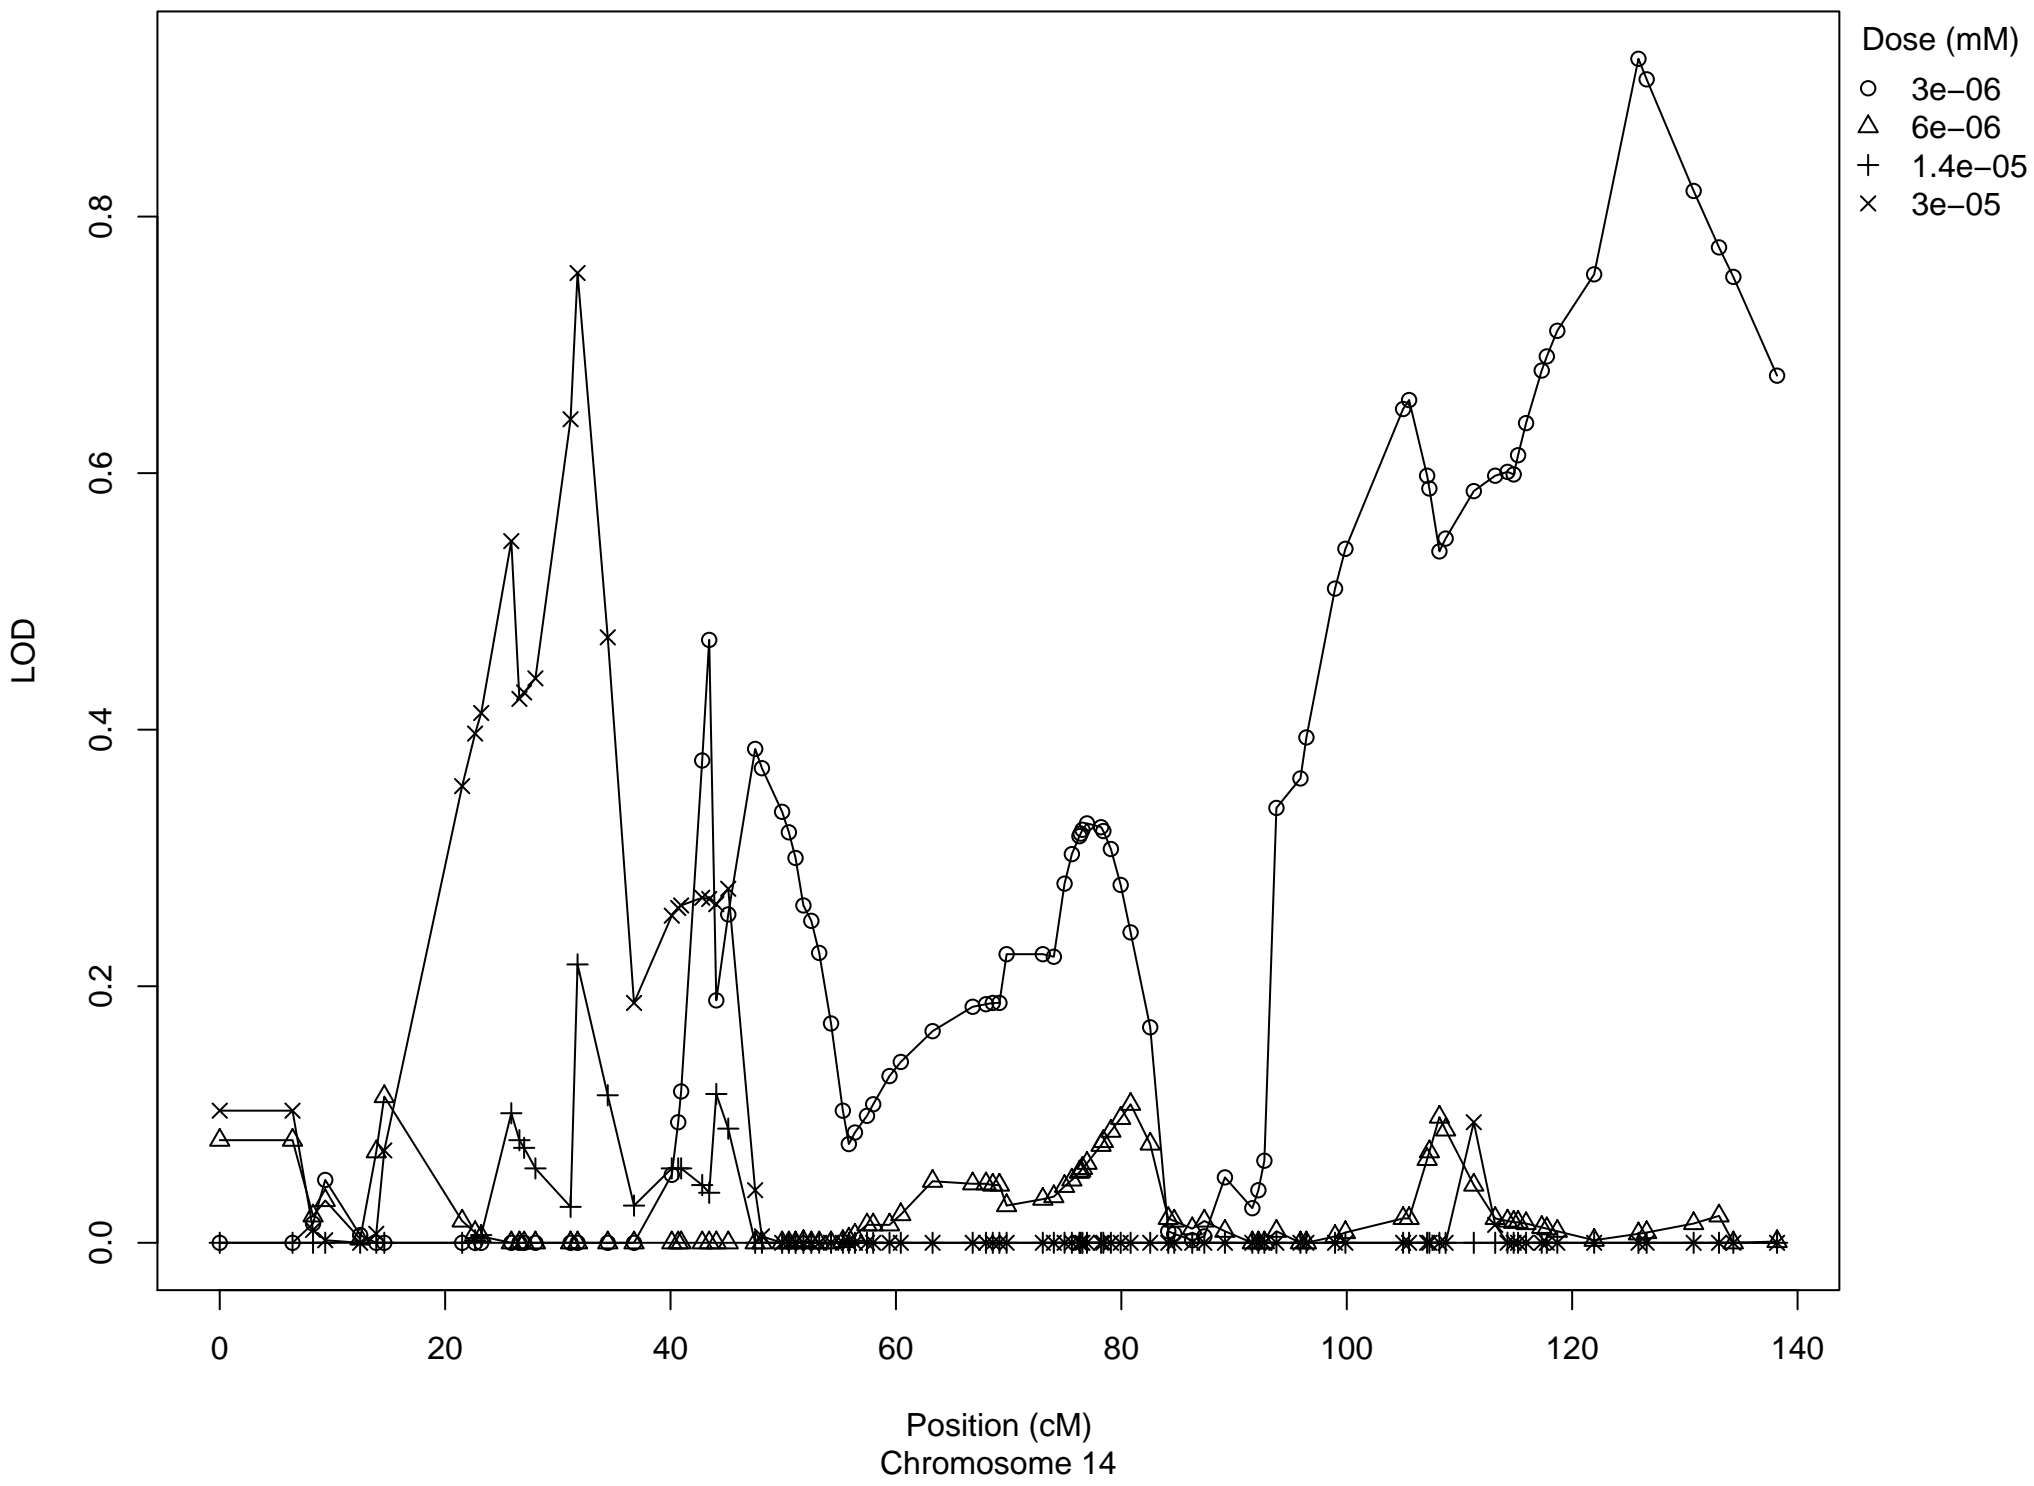

# Topotecan (Topo)

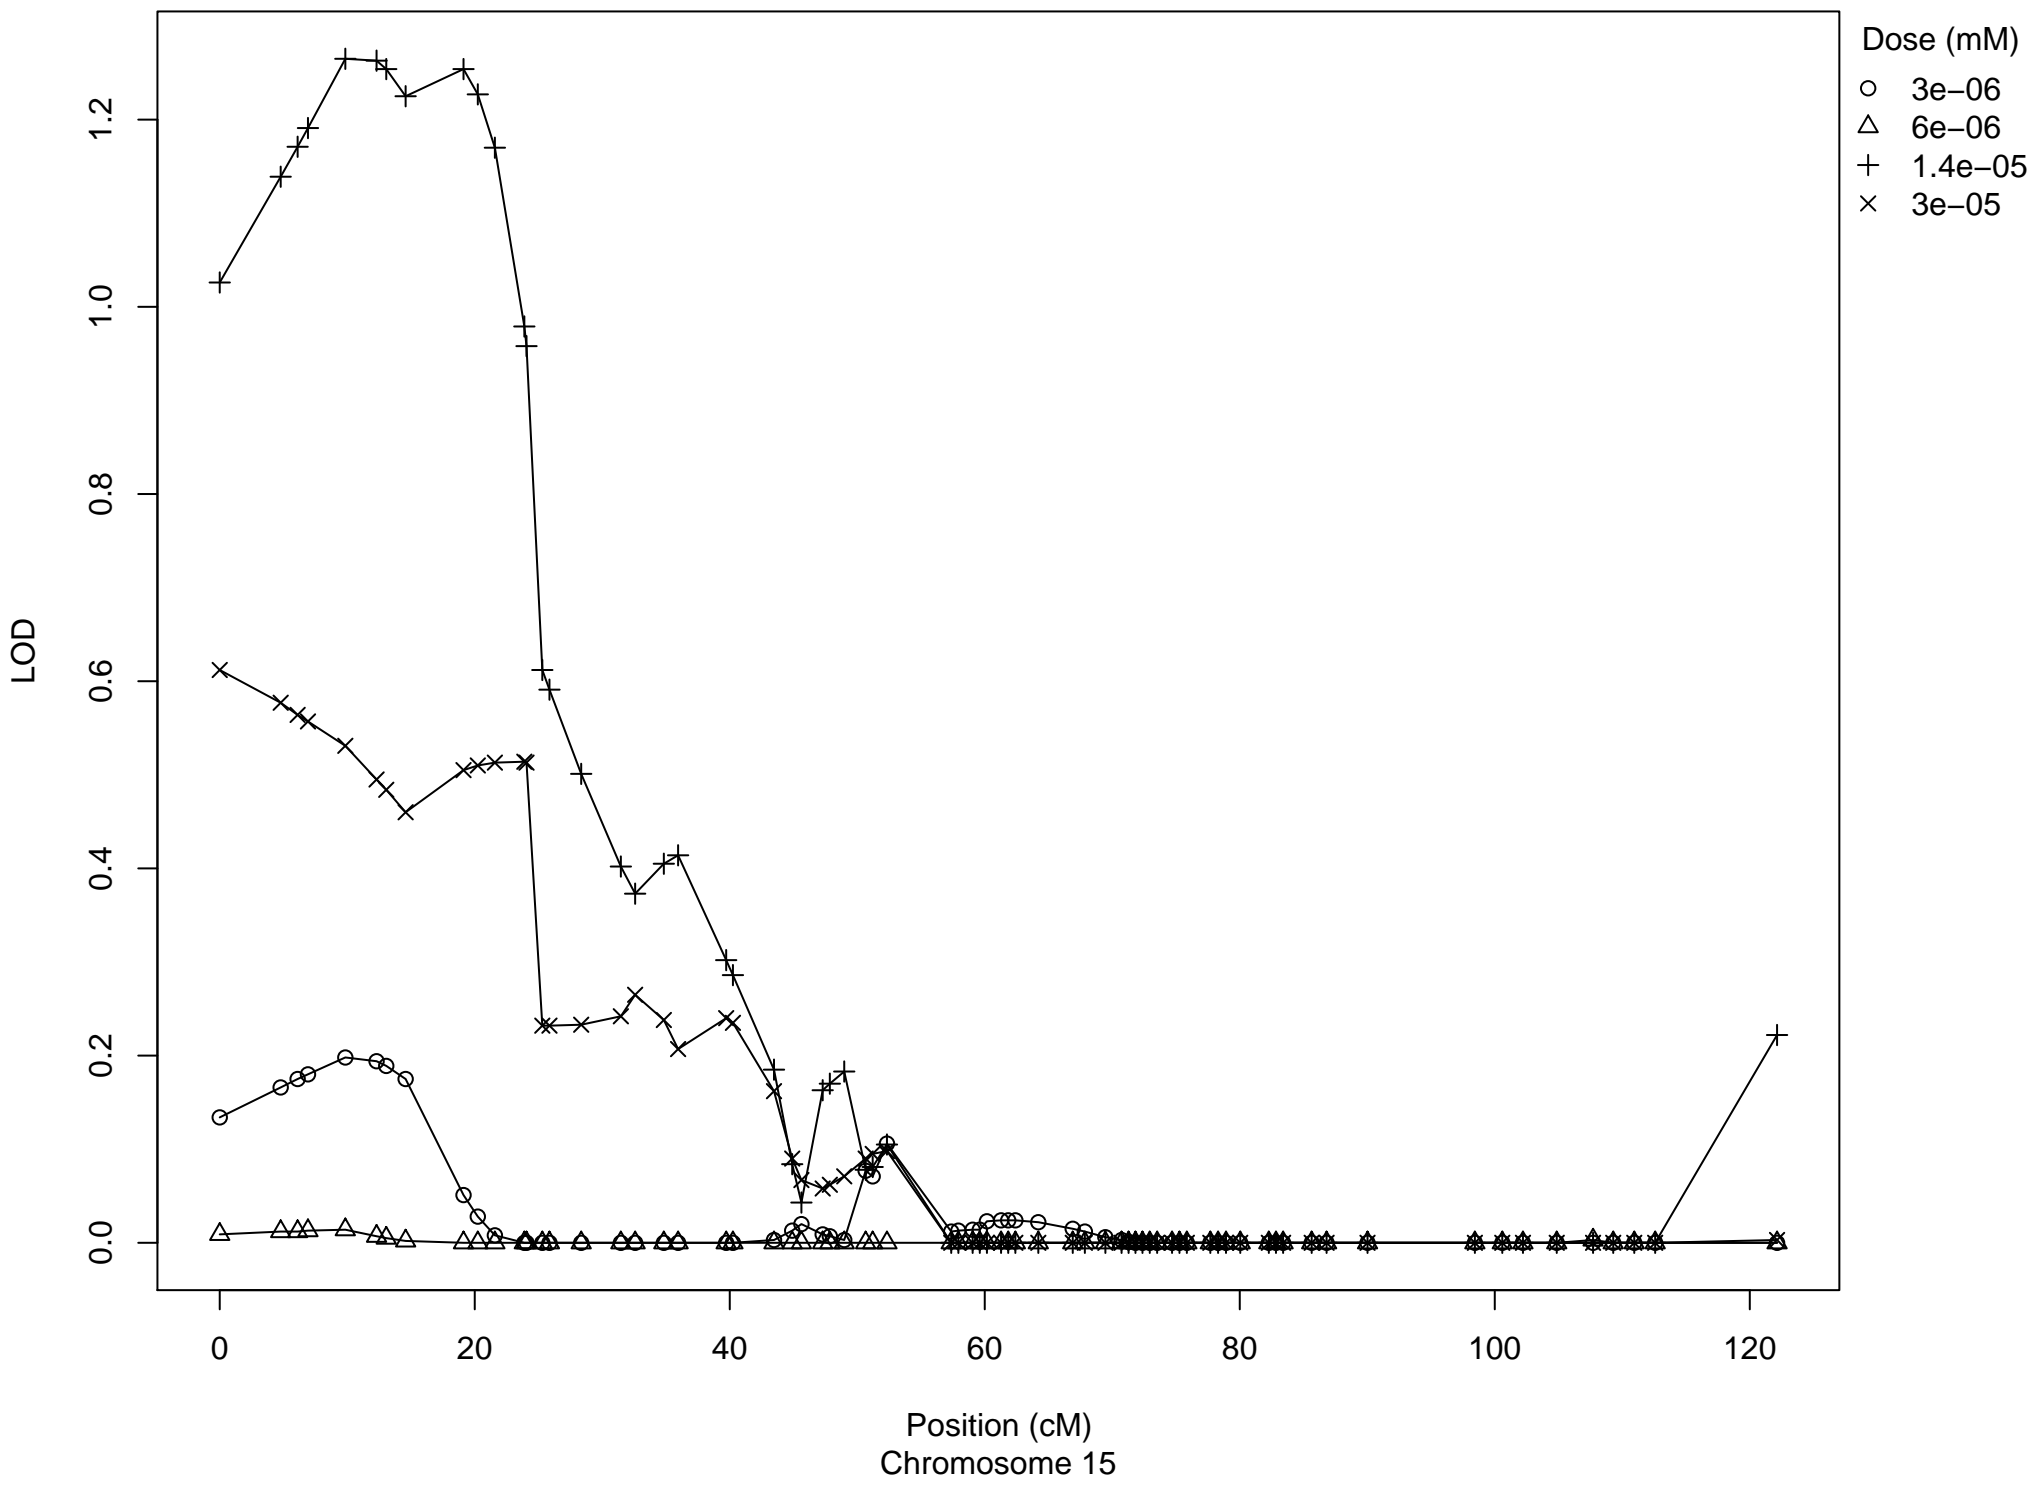

# Topotecan (Topo)

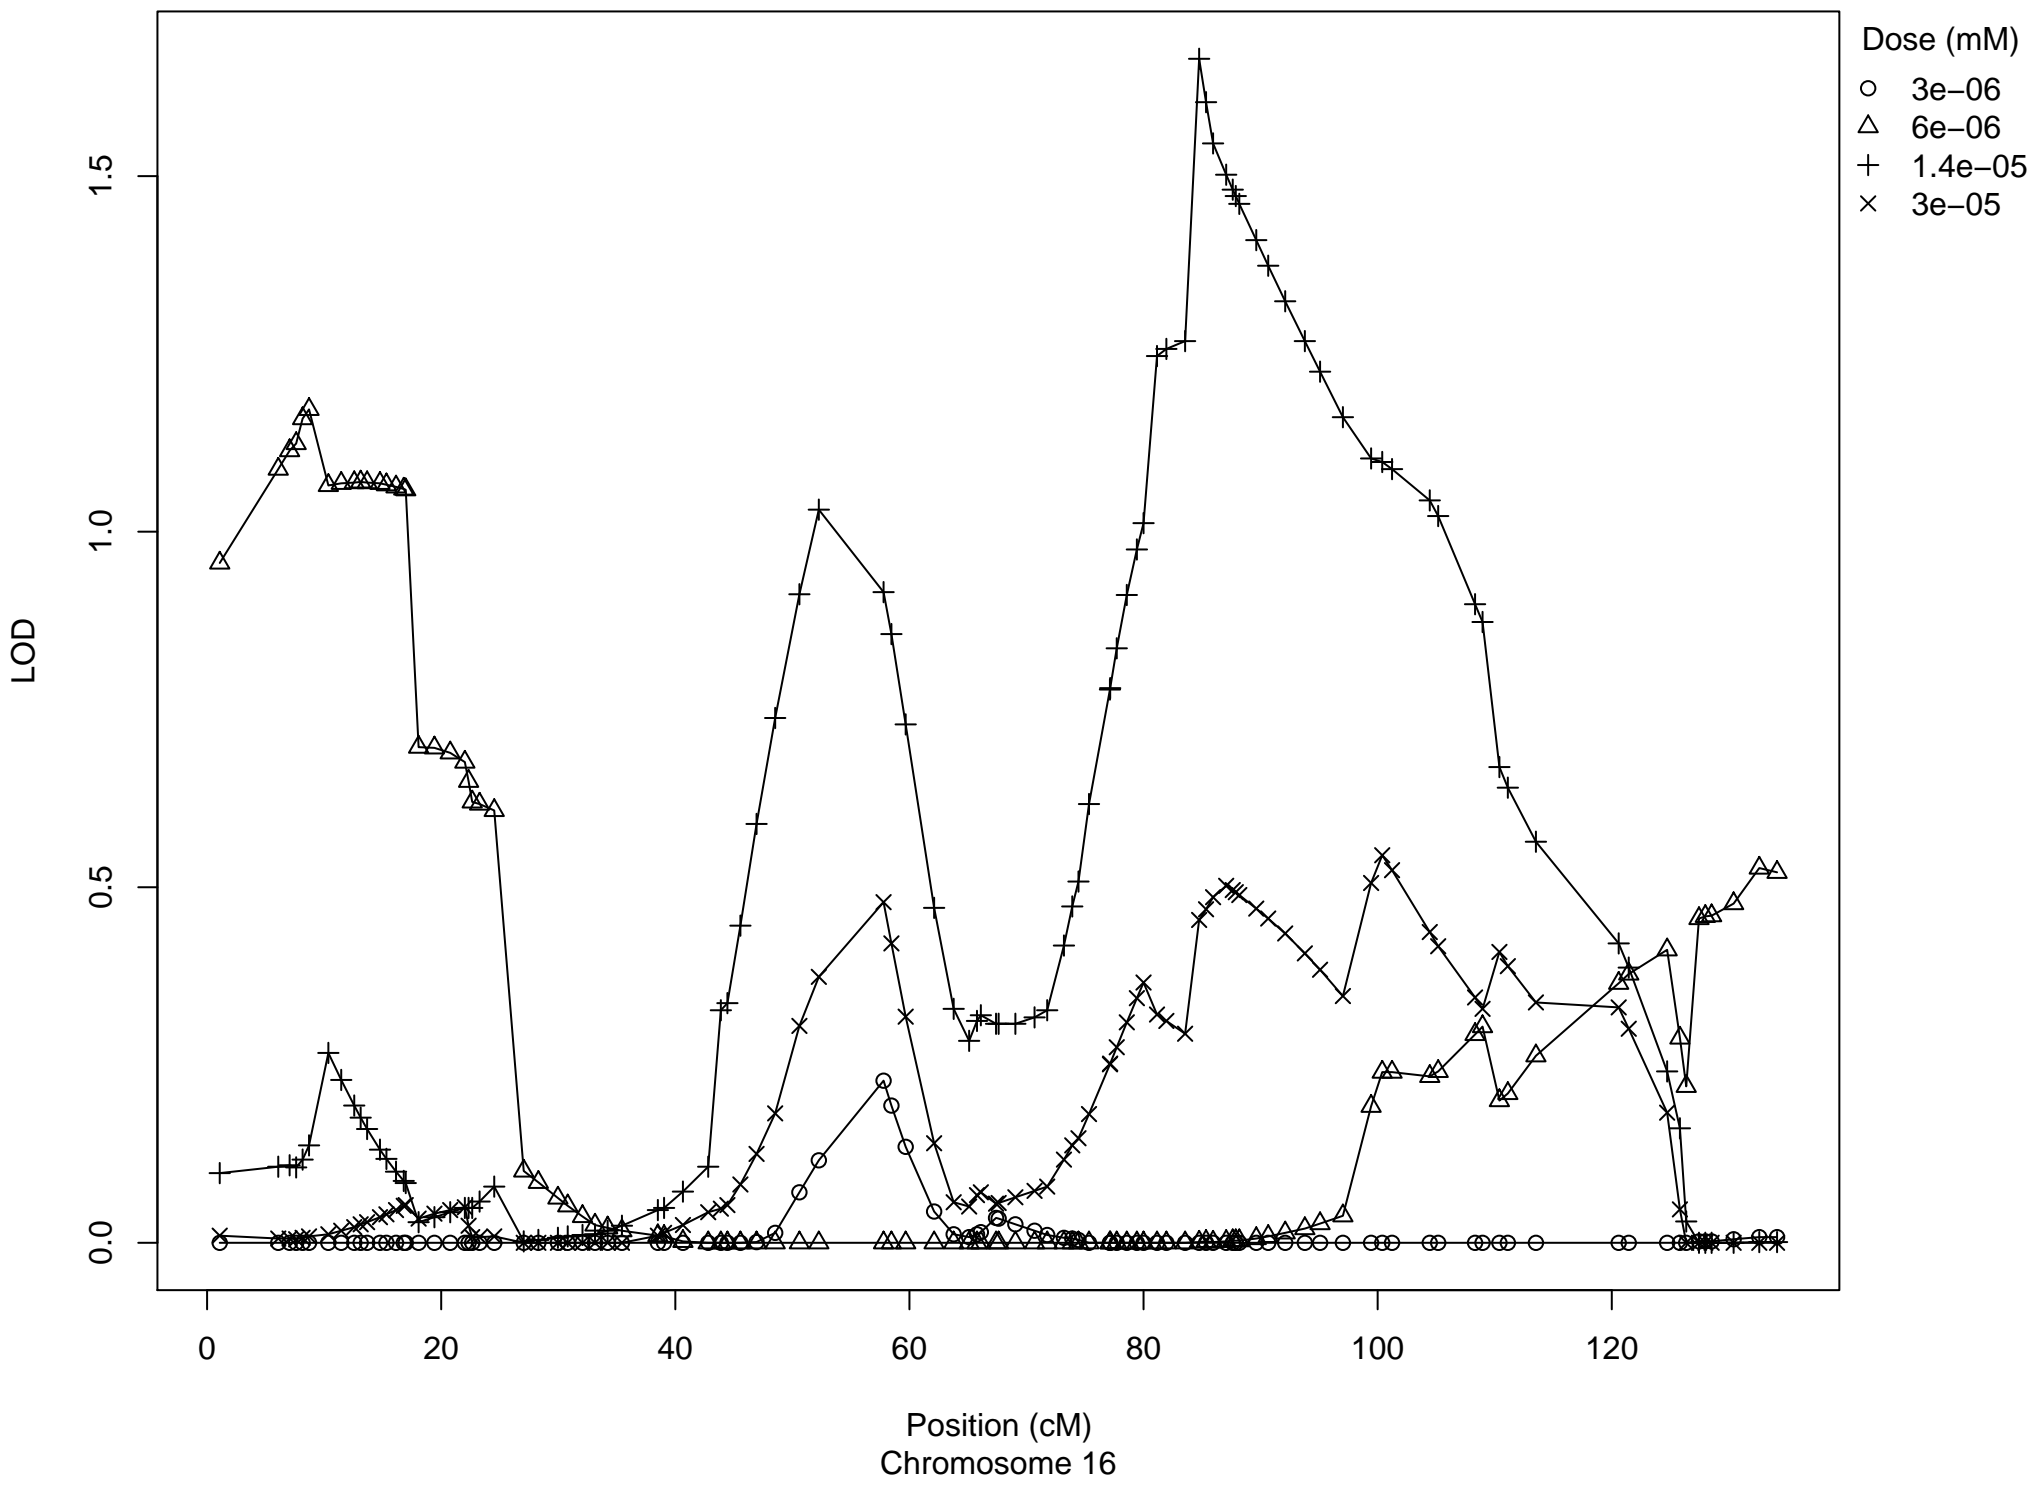

# Topotecan (Topo)

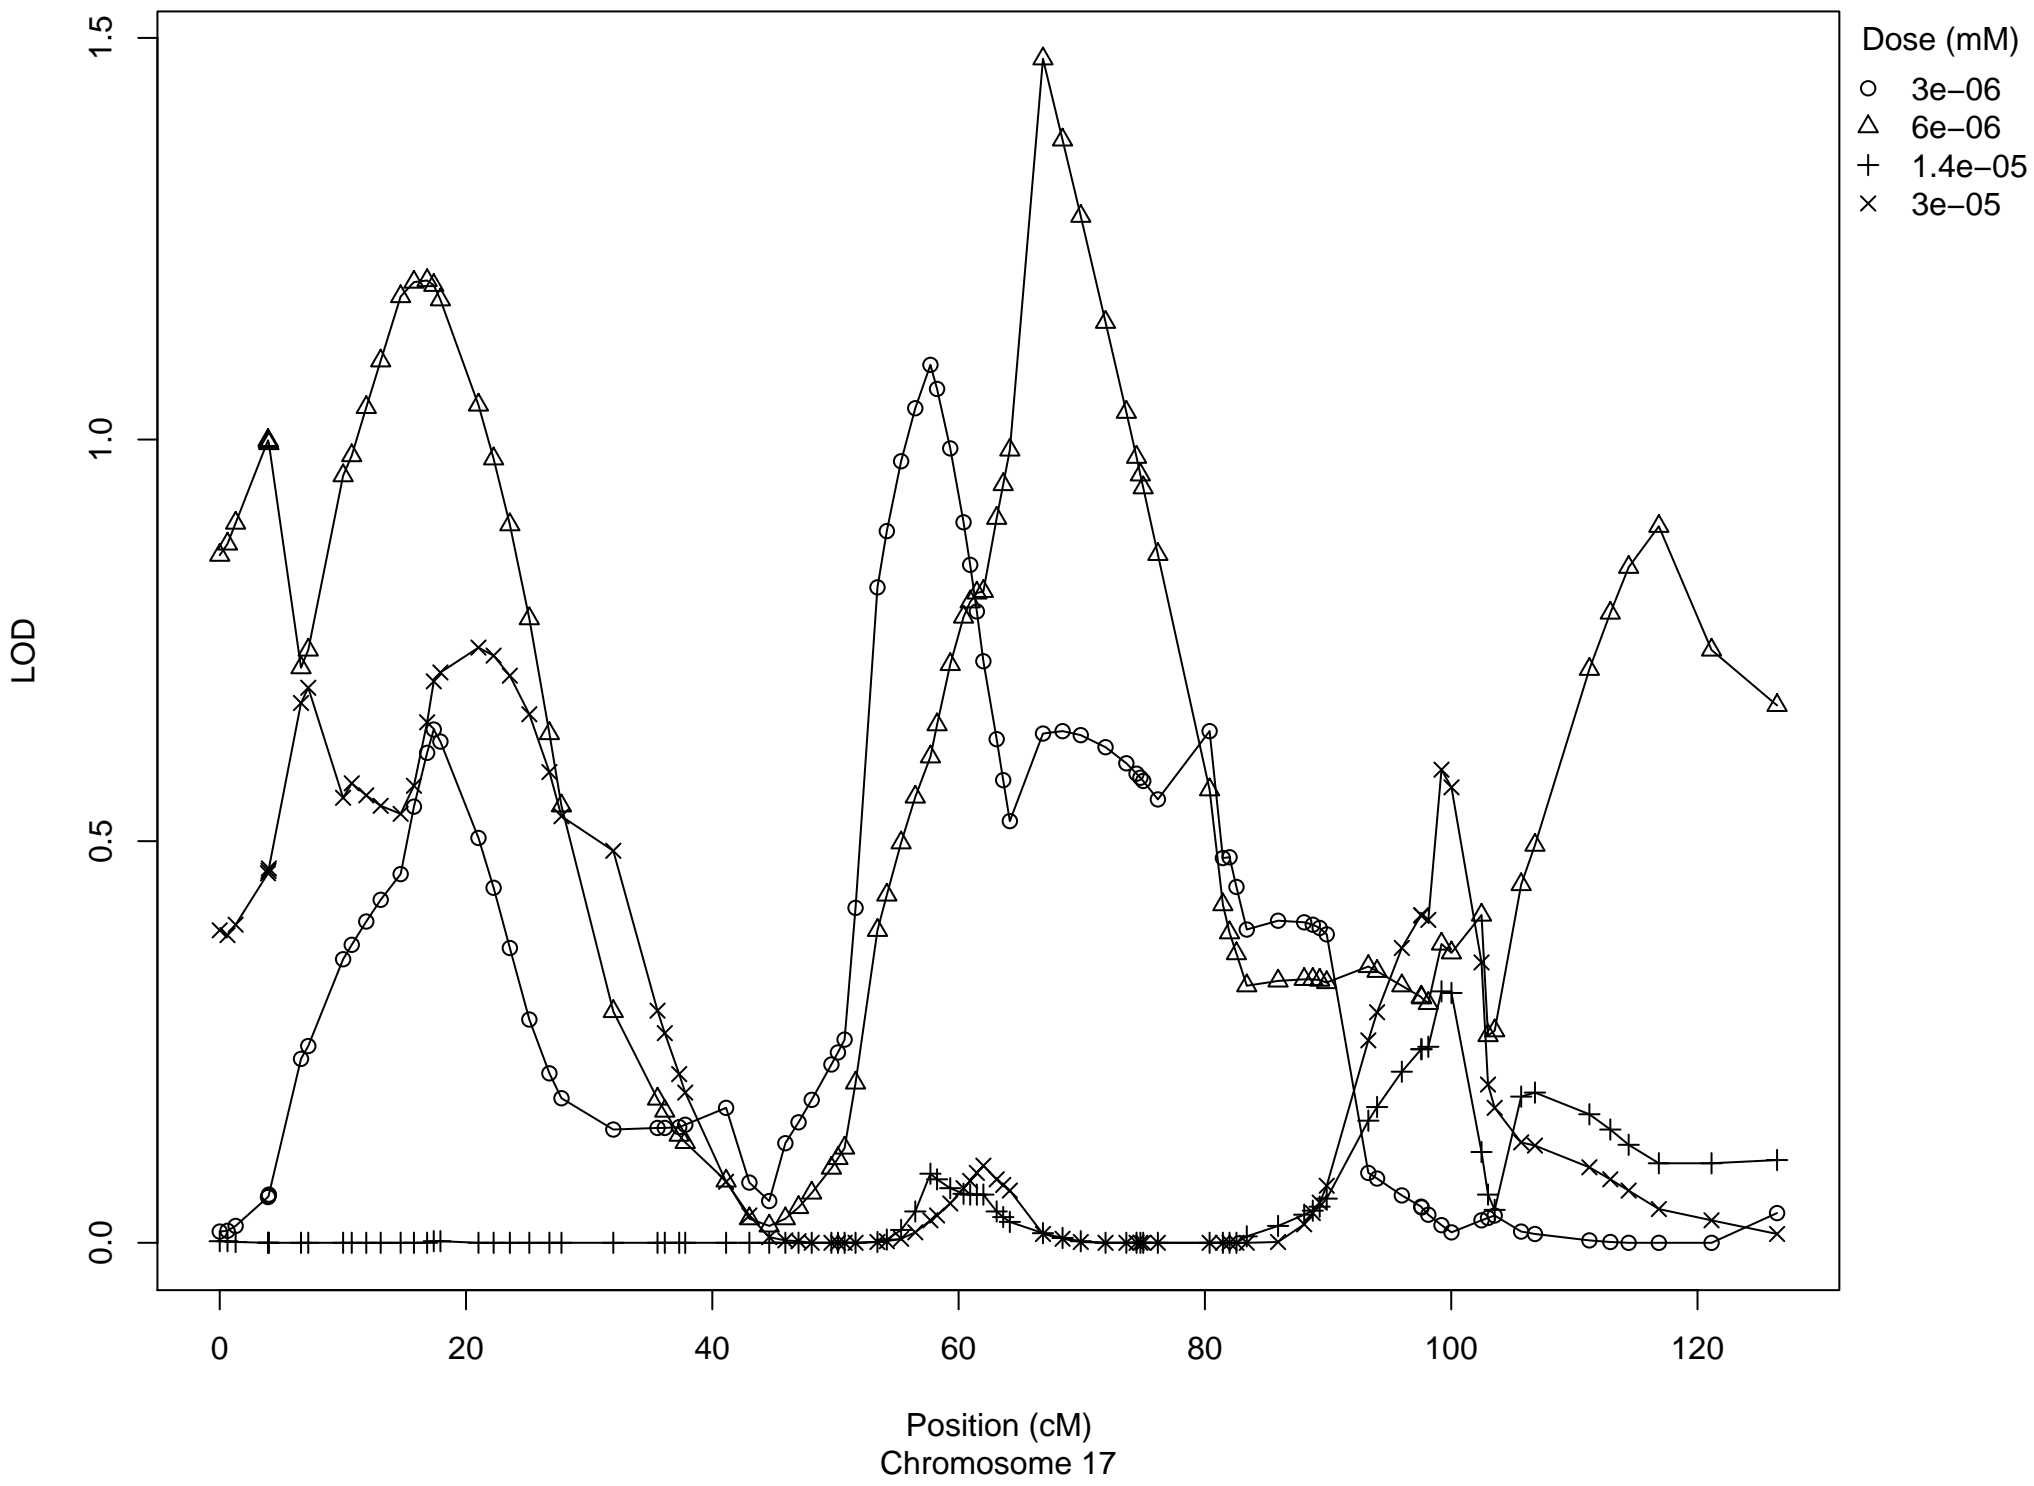

# Topotecan (Topo)

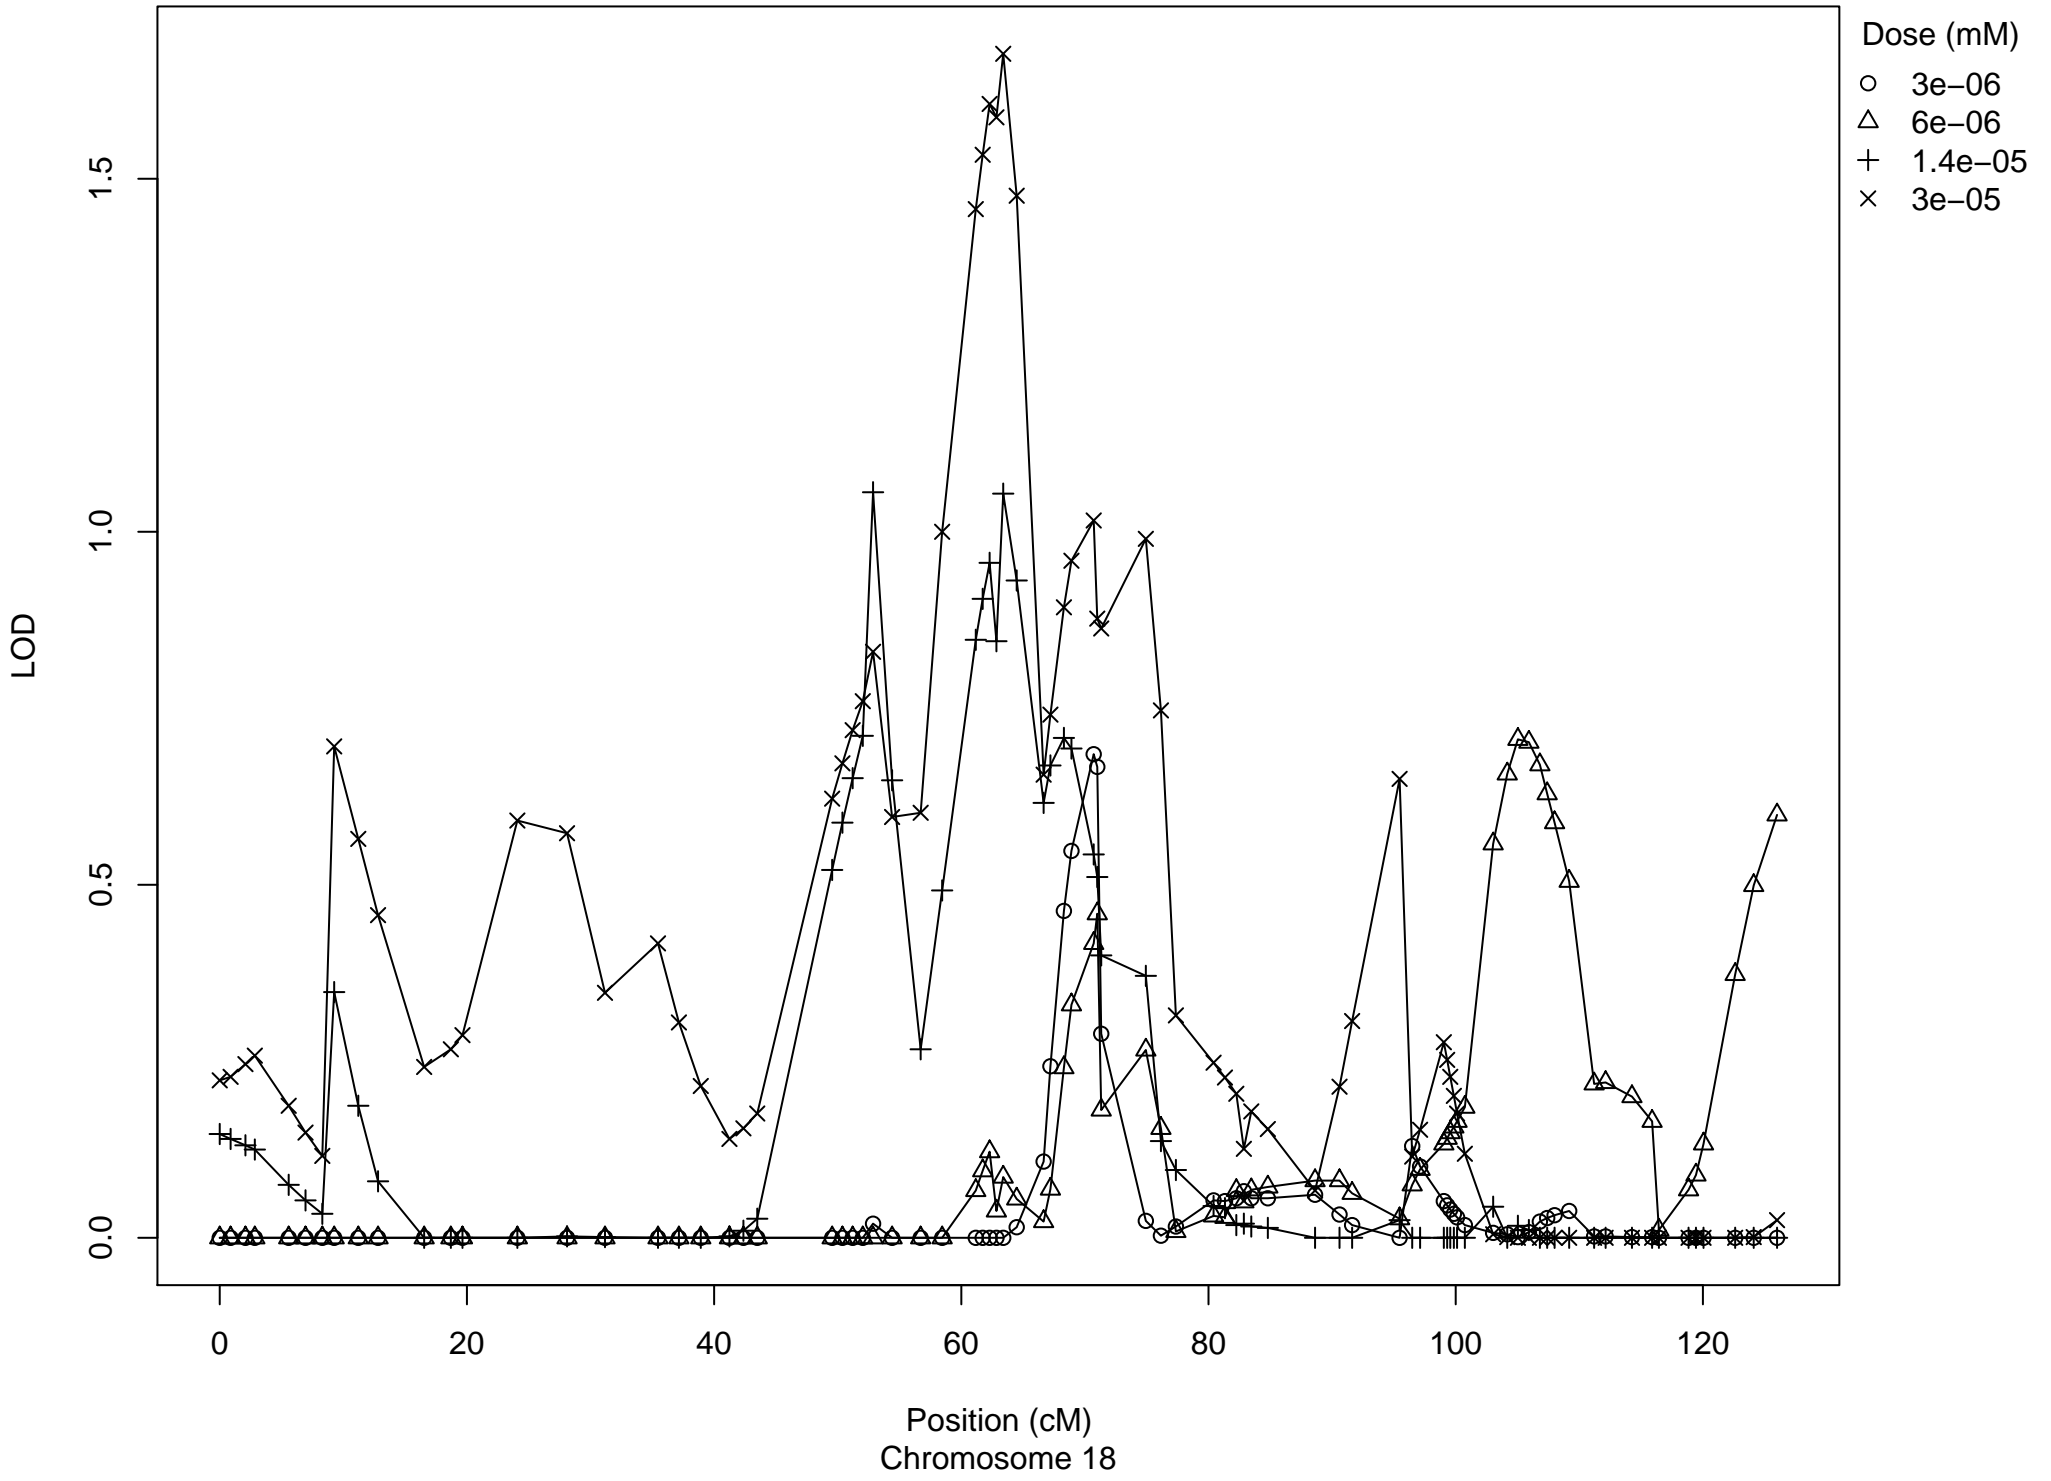



# Topotecan (Topo)

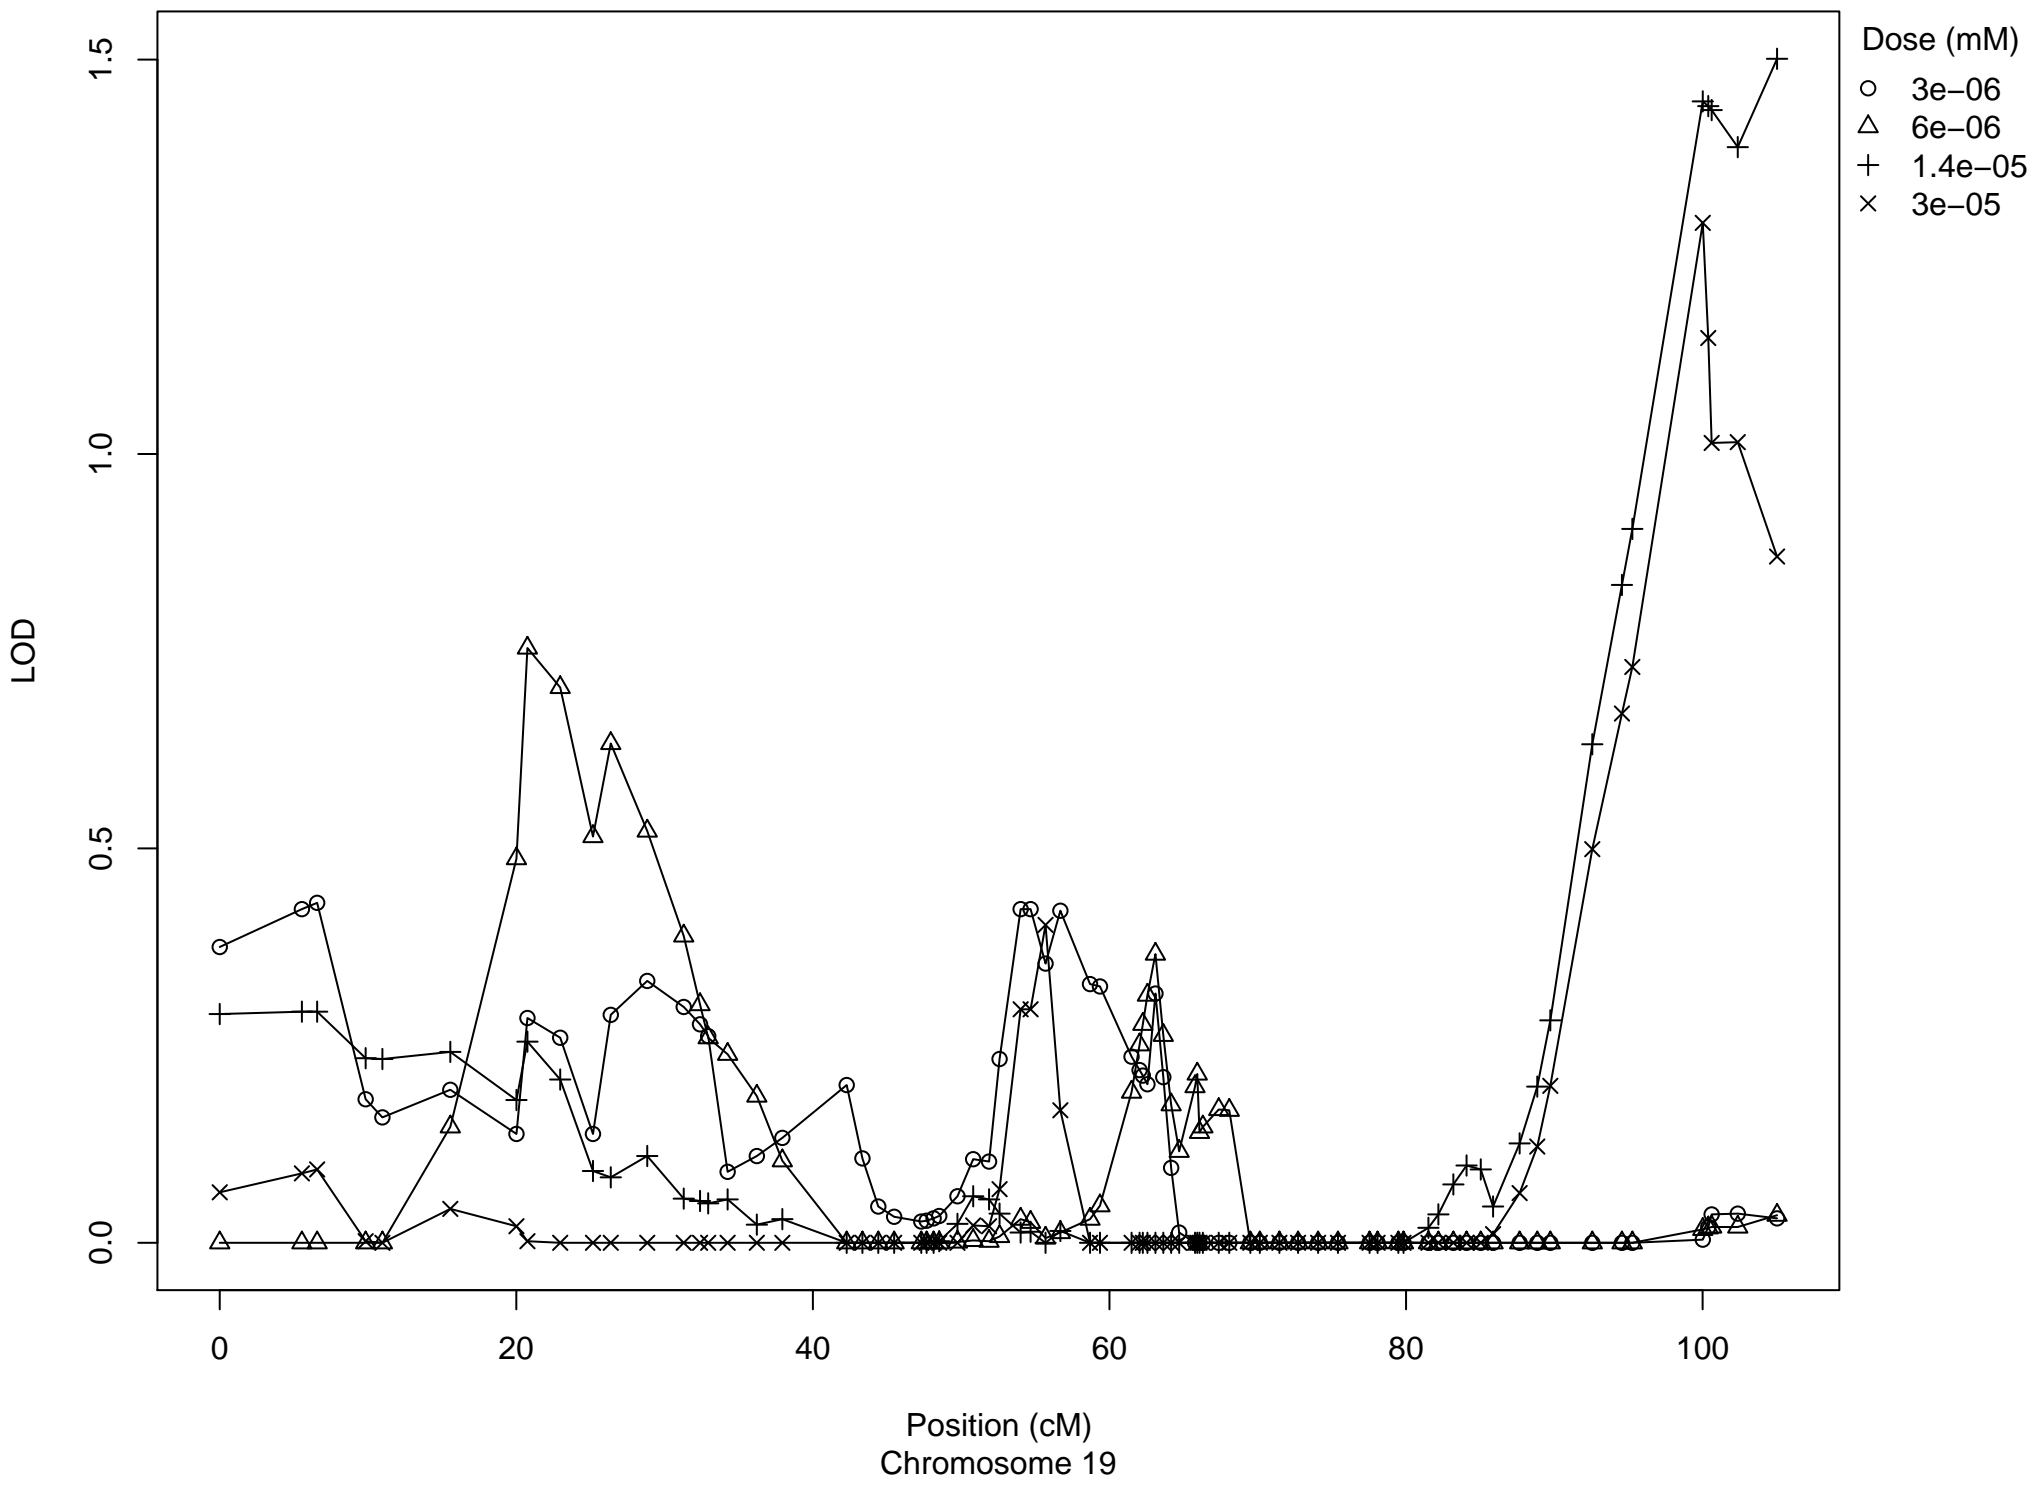

# Topotecan (Topo)

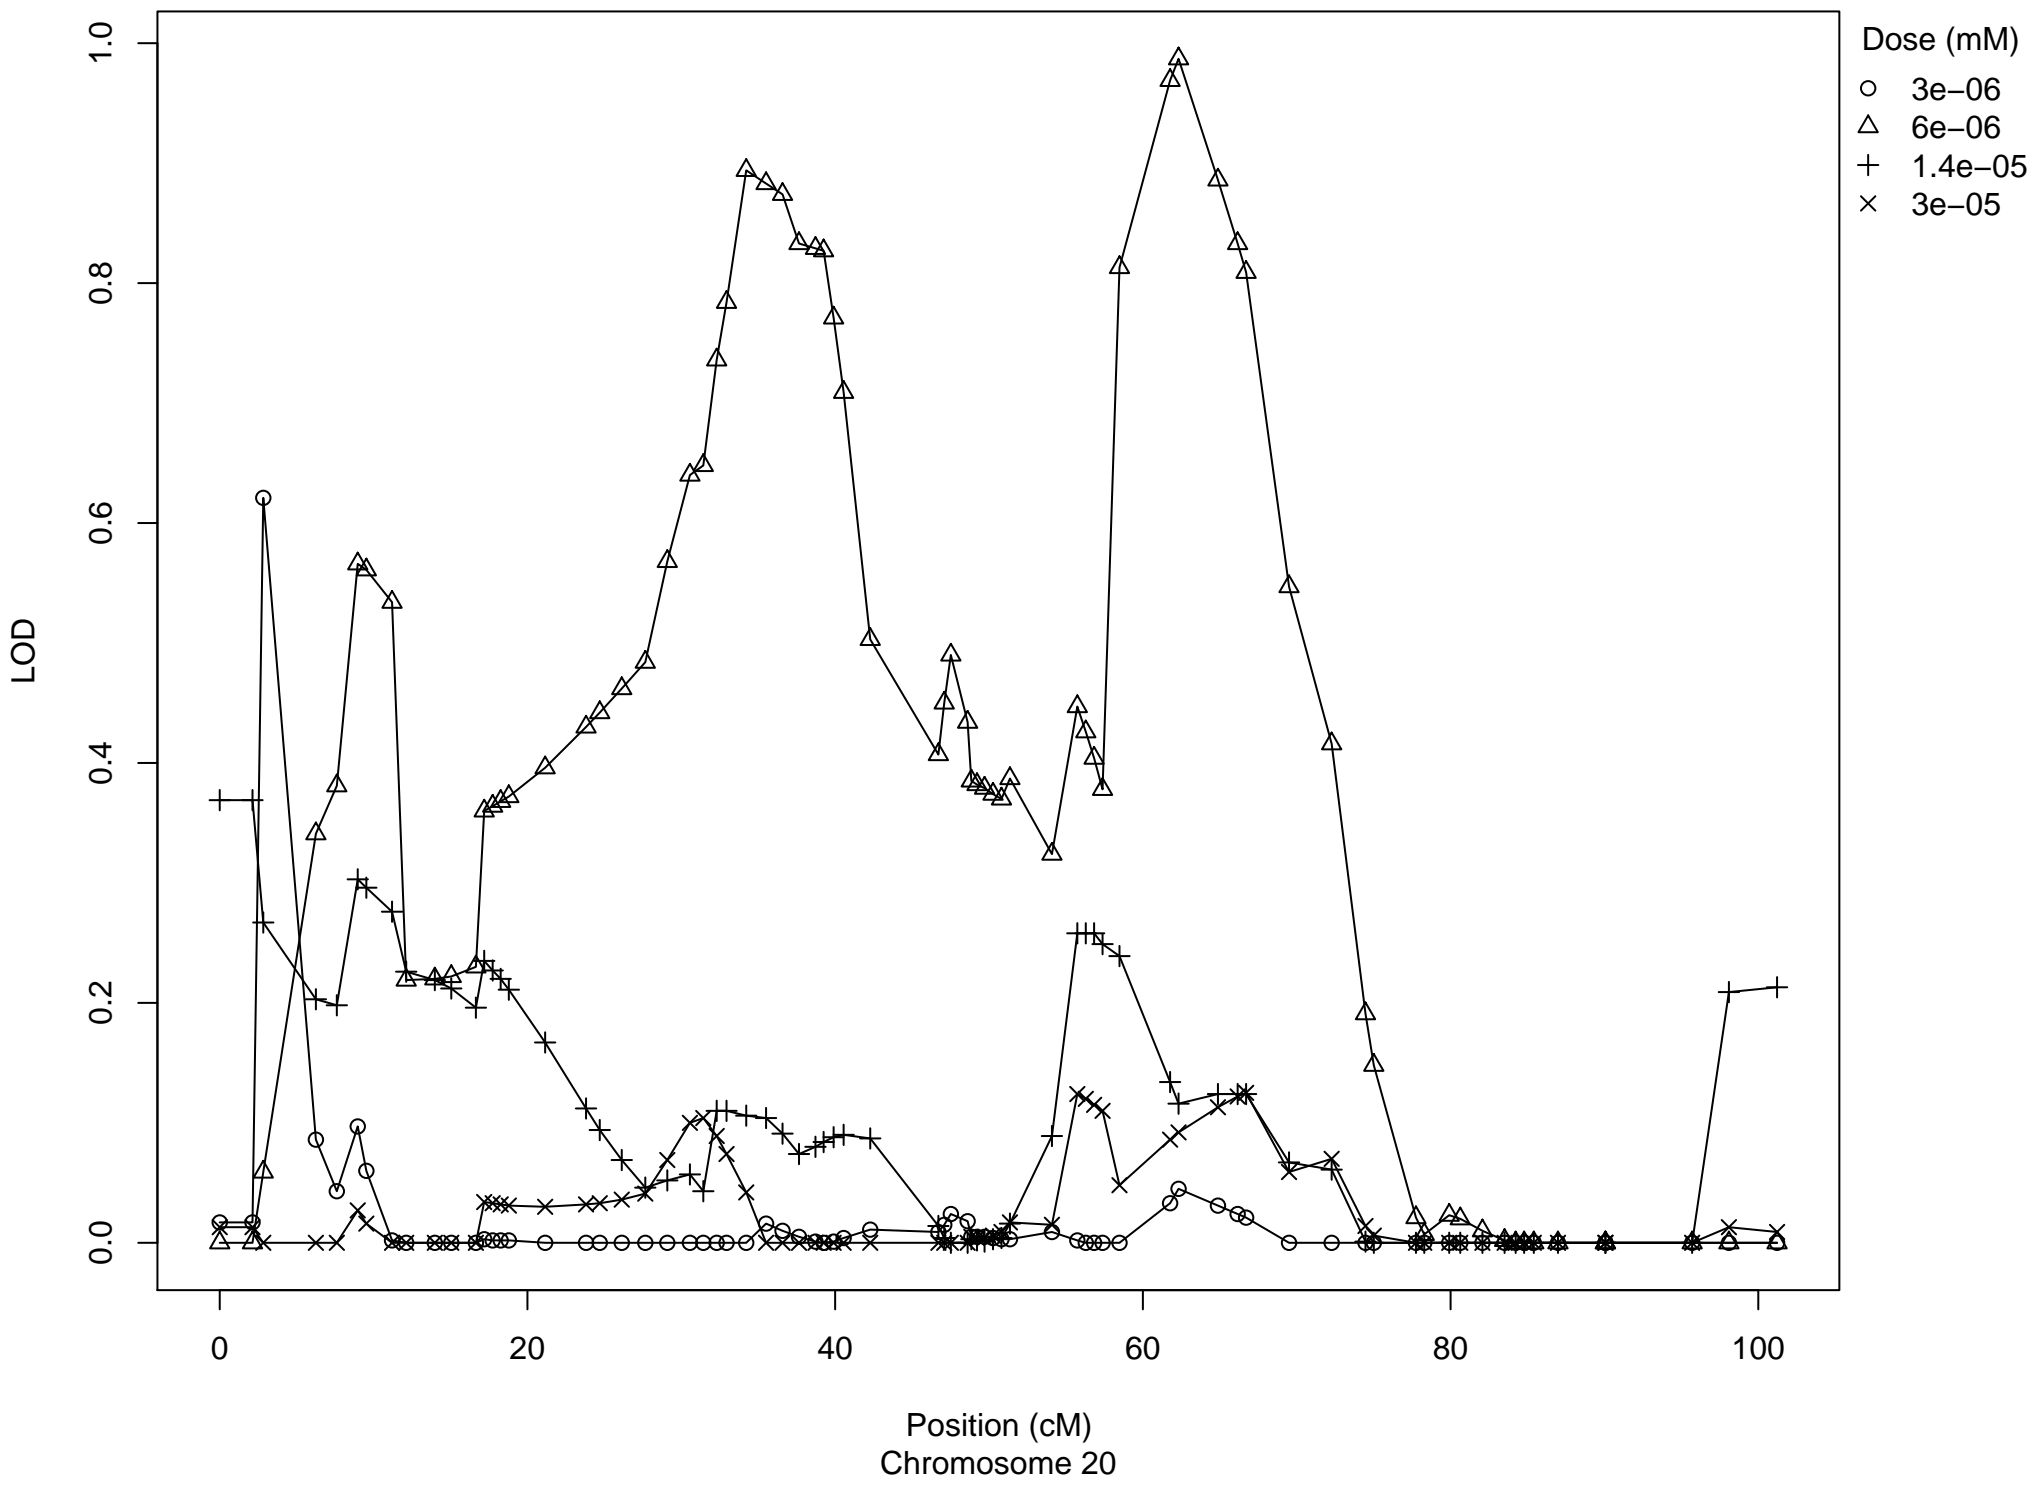

# Topotecan (Topo)

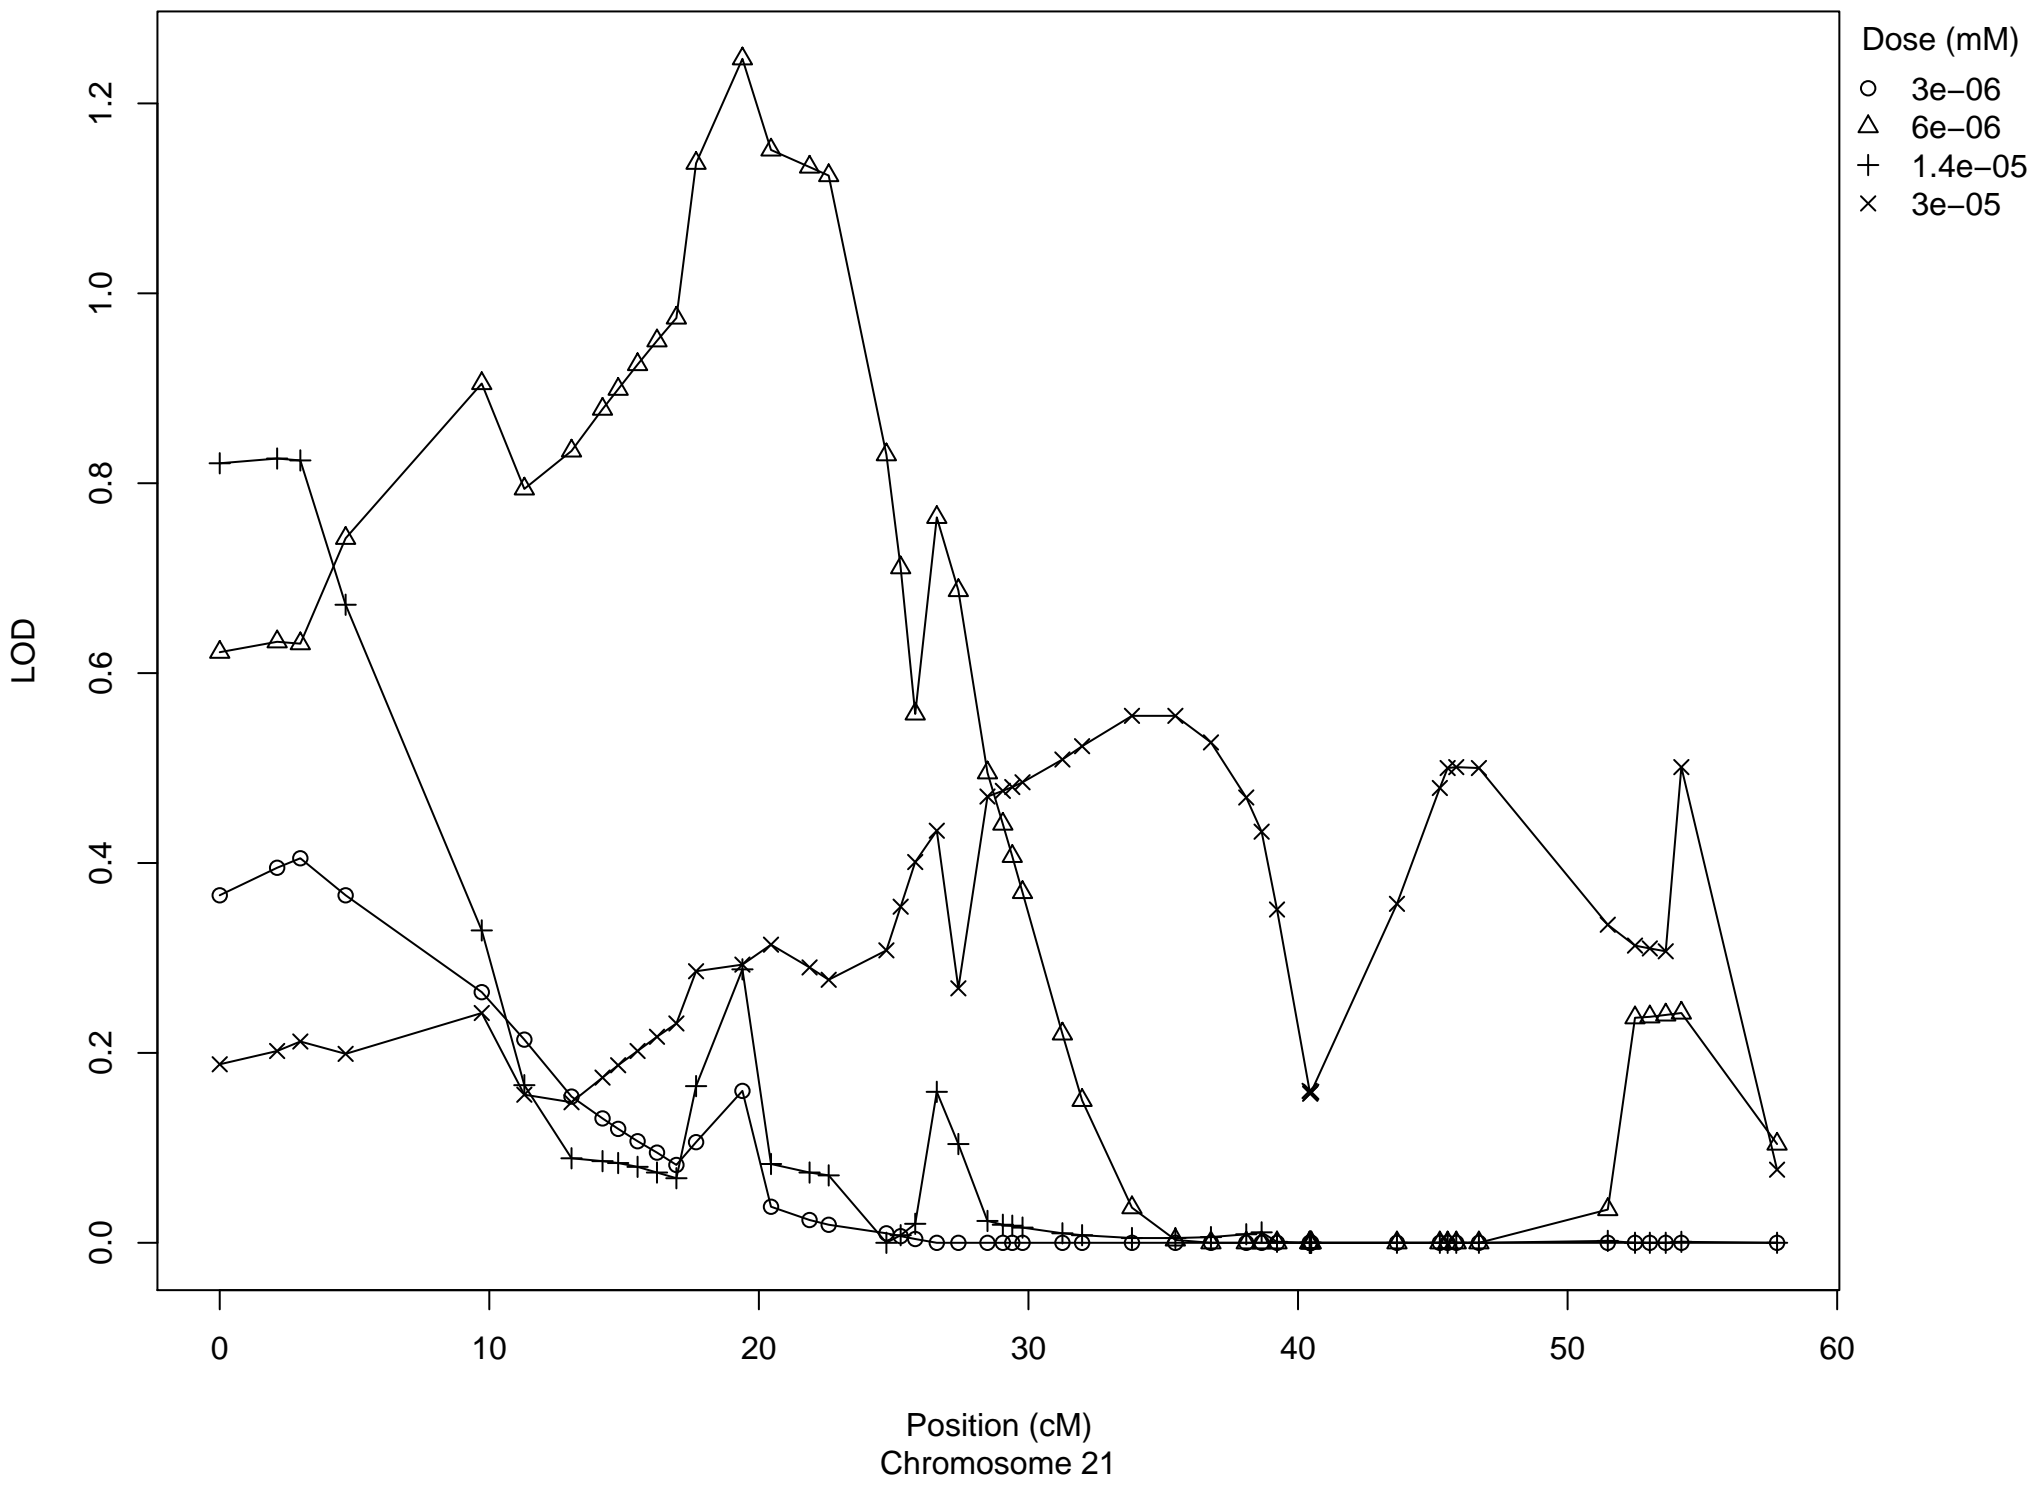

# Topotecan (Topo)

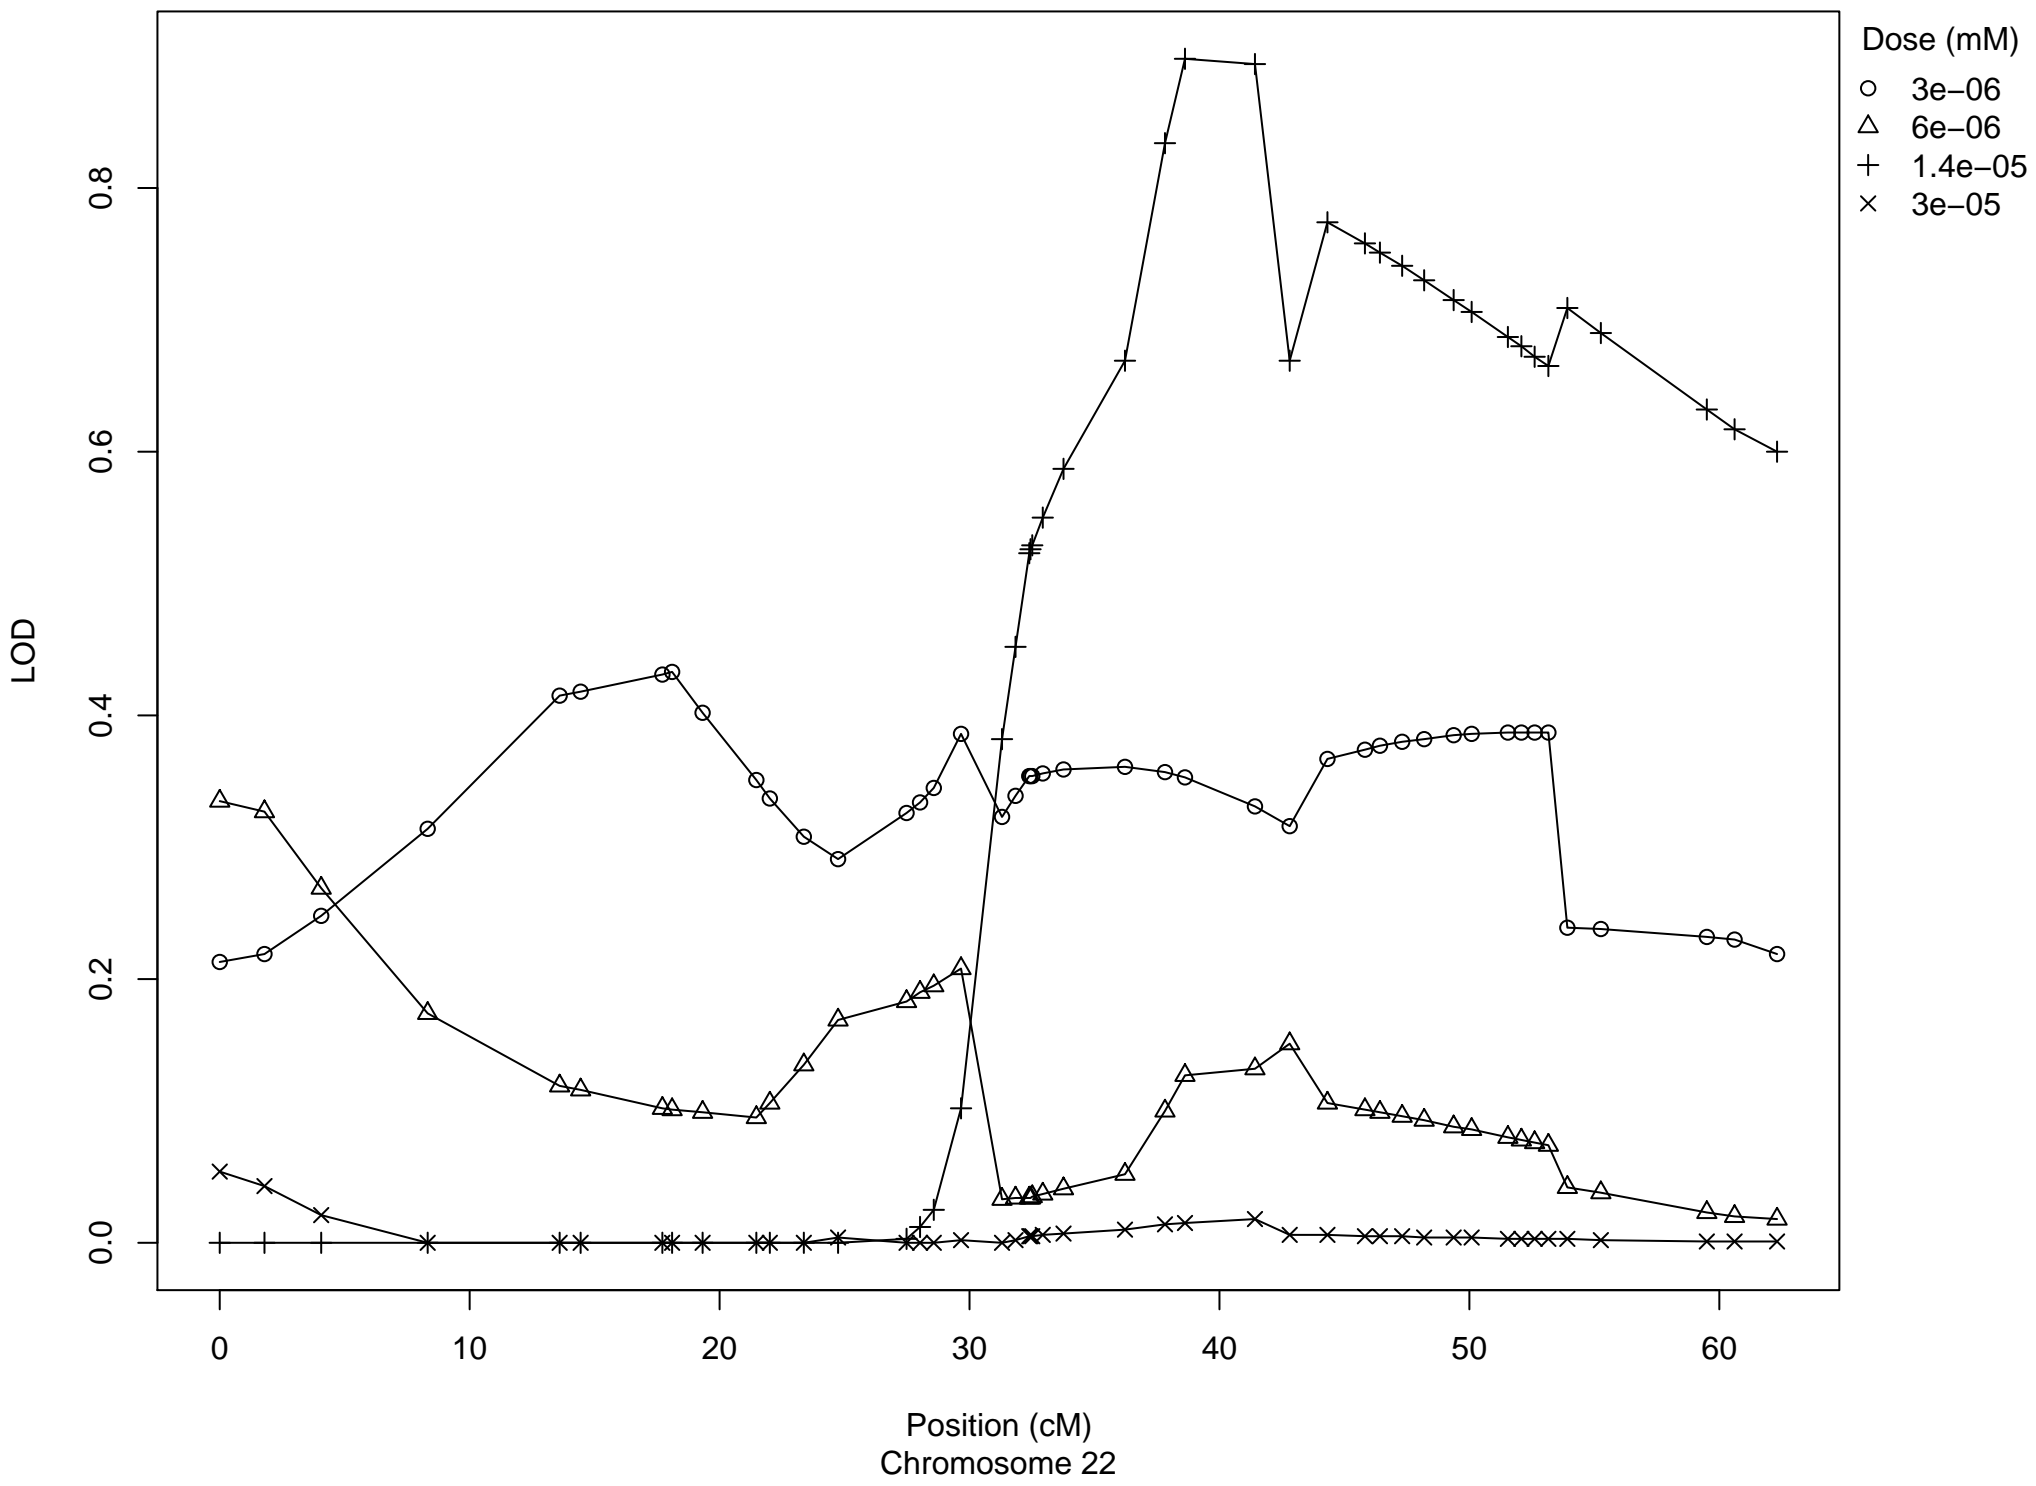

# Vinblastine Sulfate Salt (Vinb)

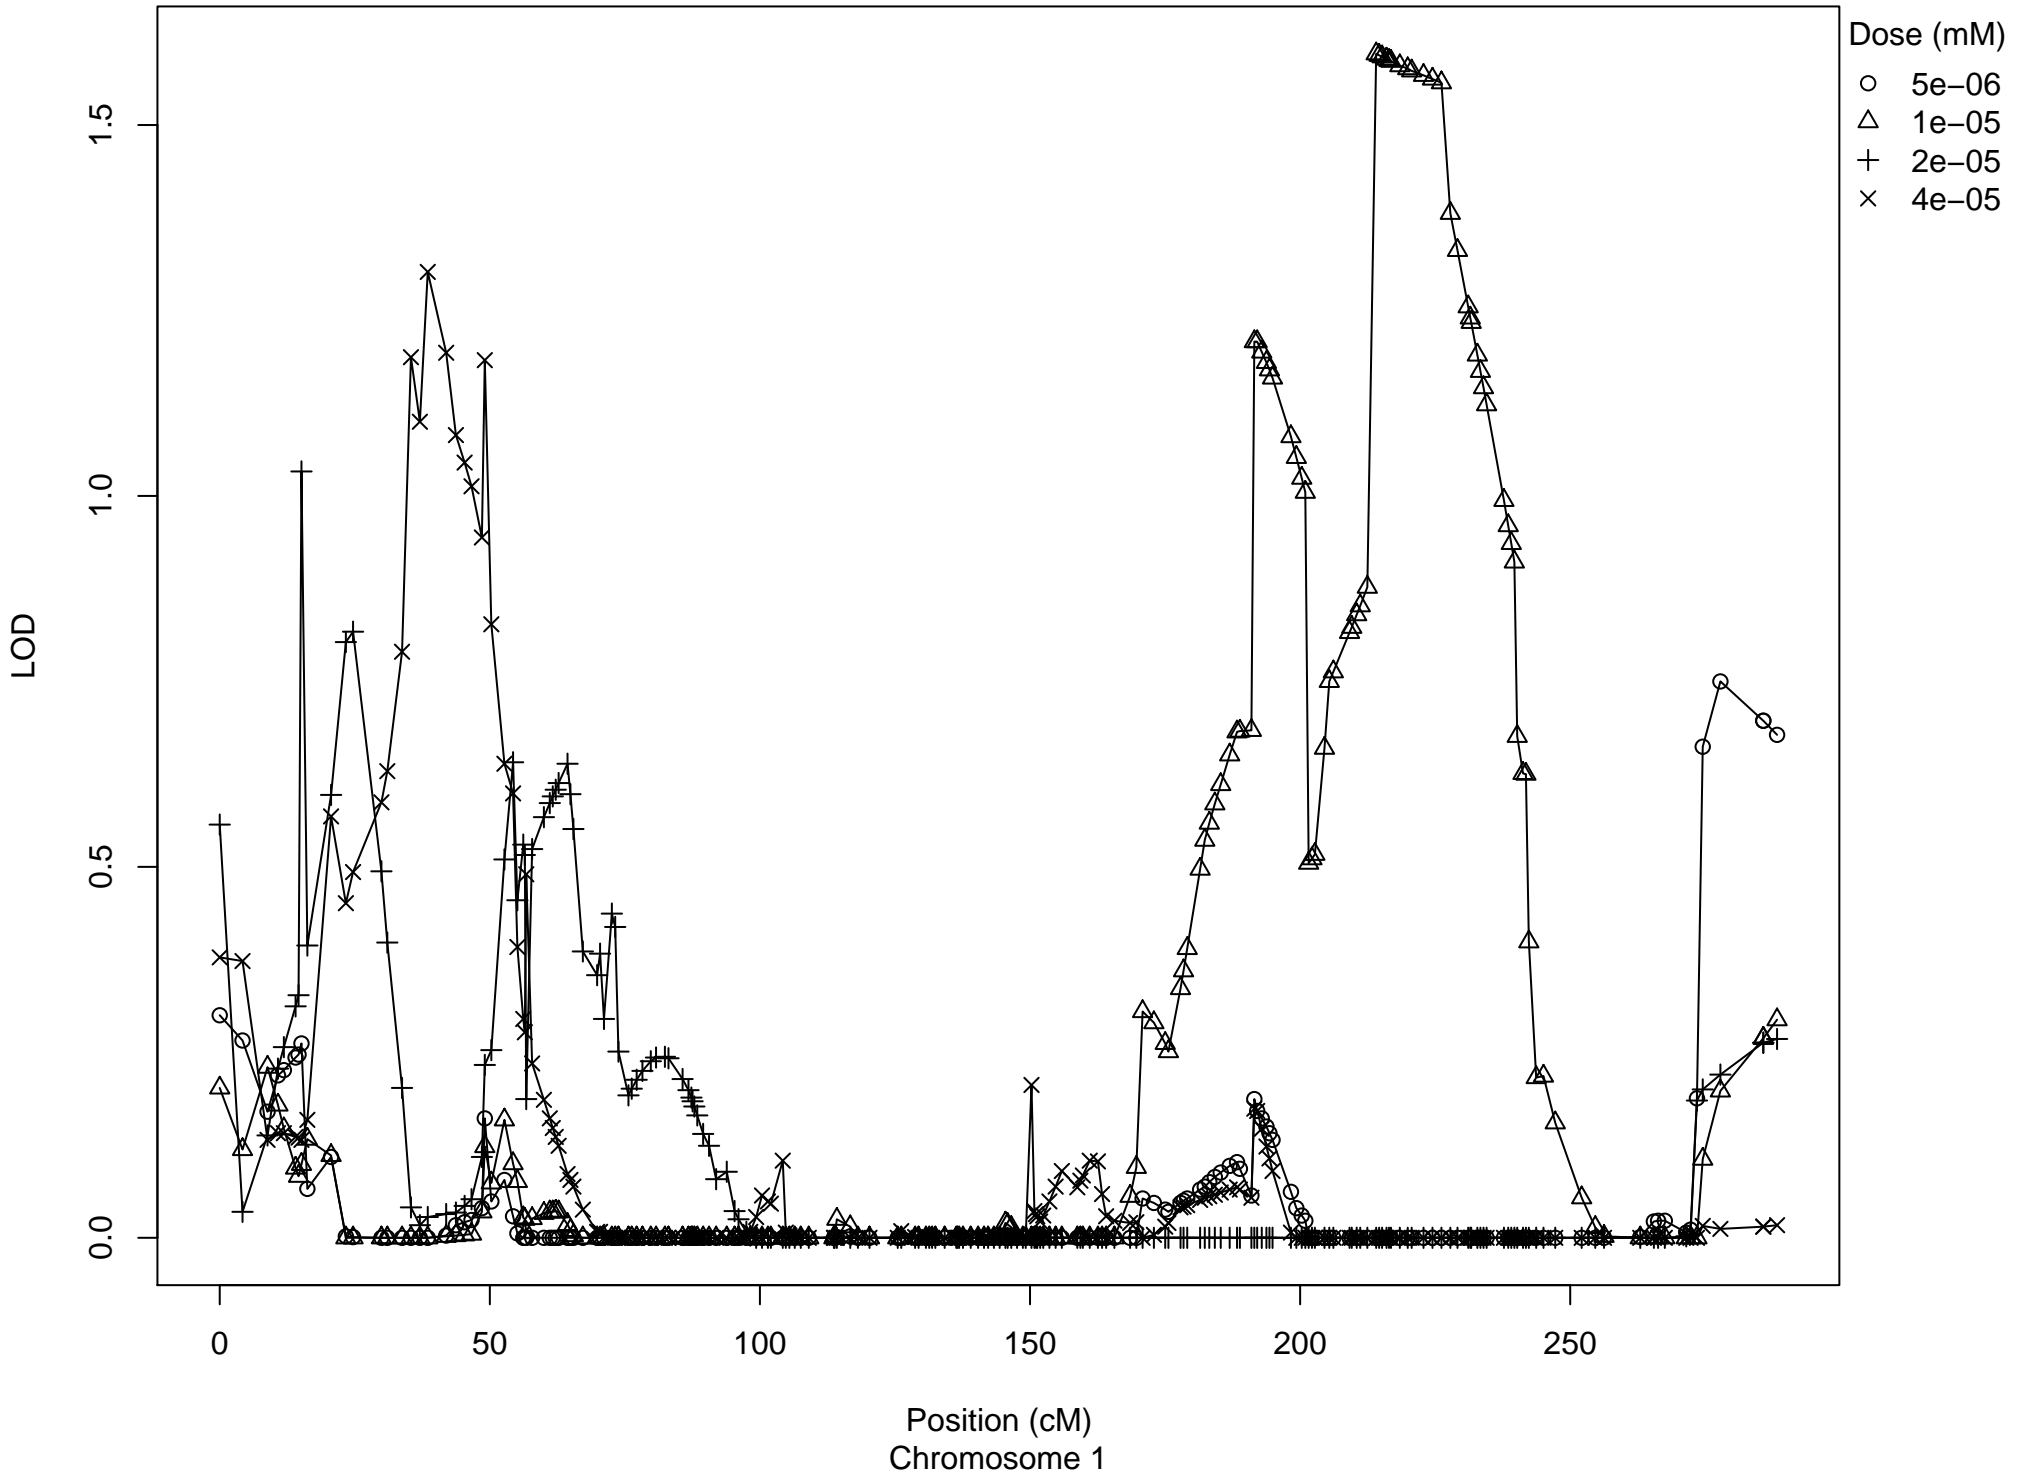

# Vinblastine Sulfate Salt (Vinb)

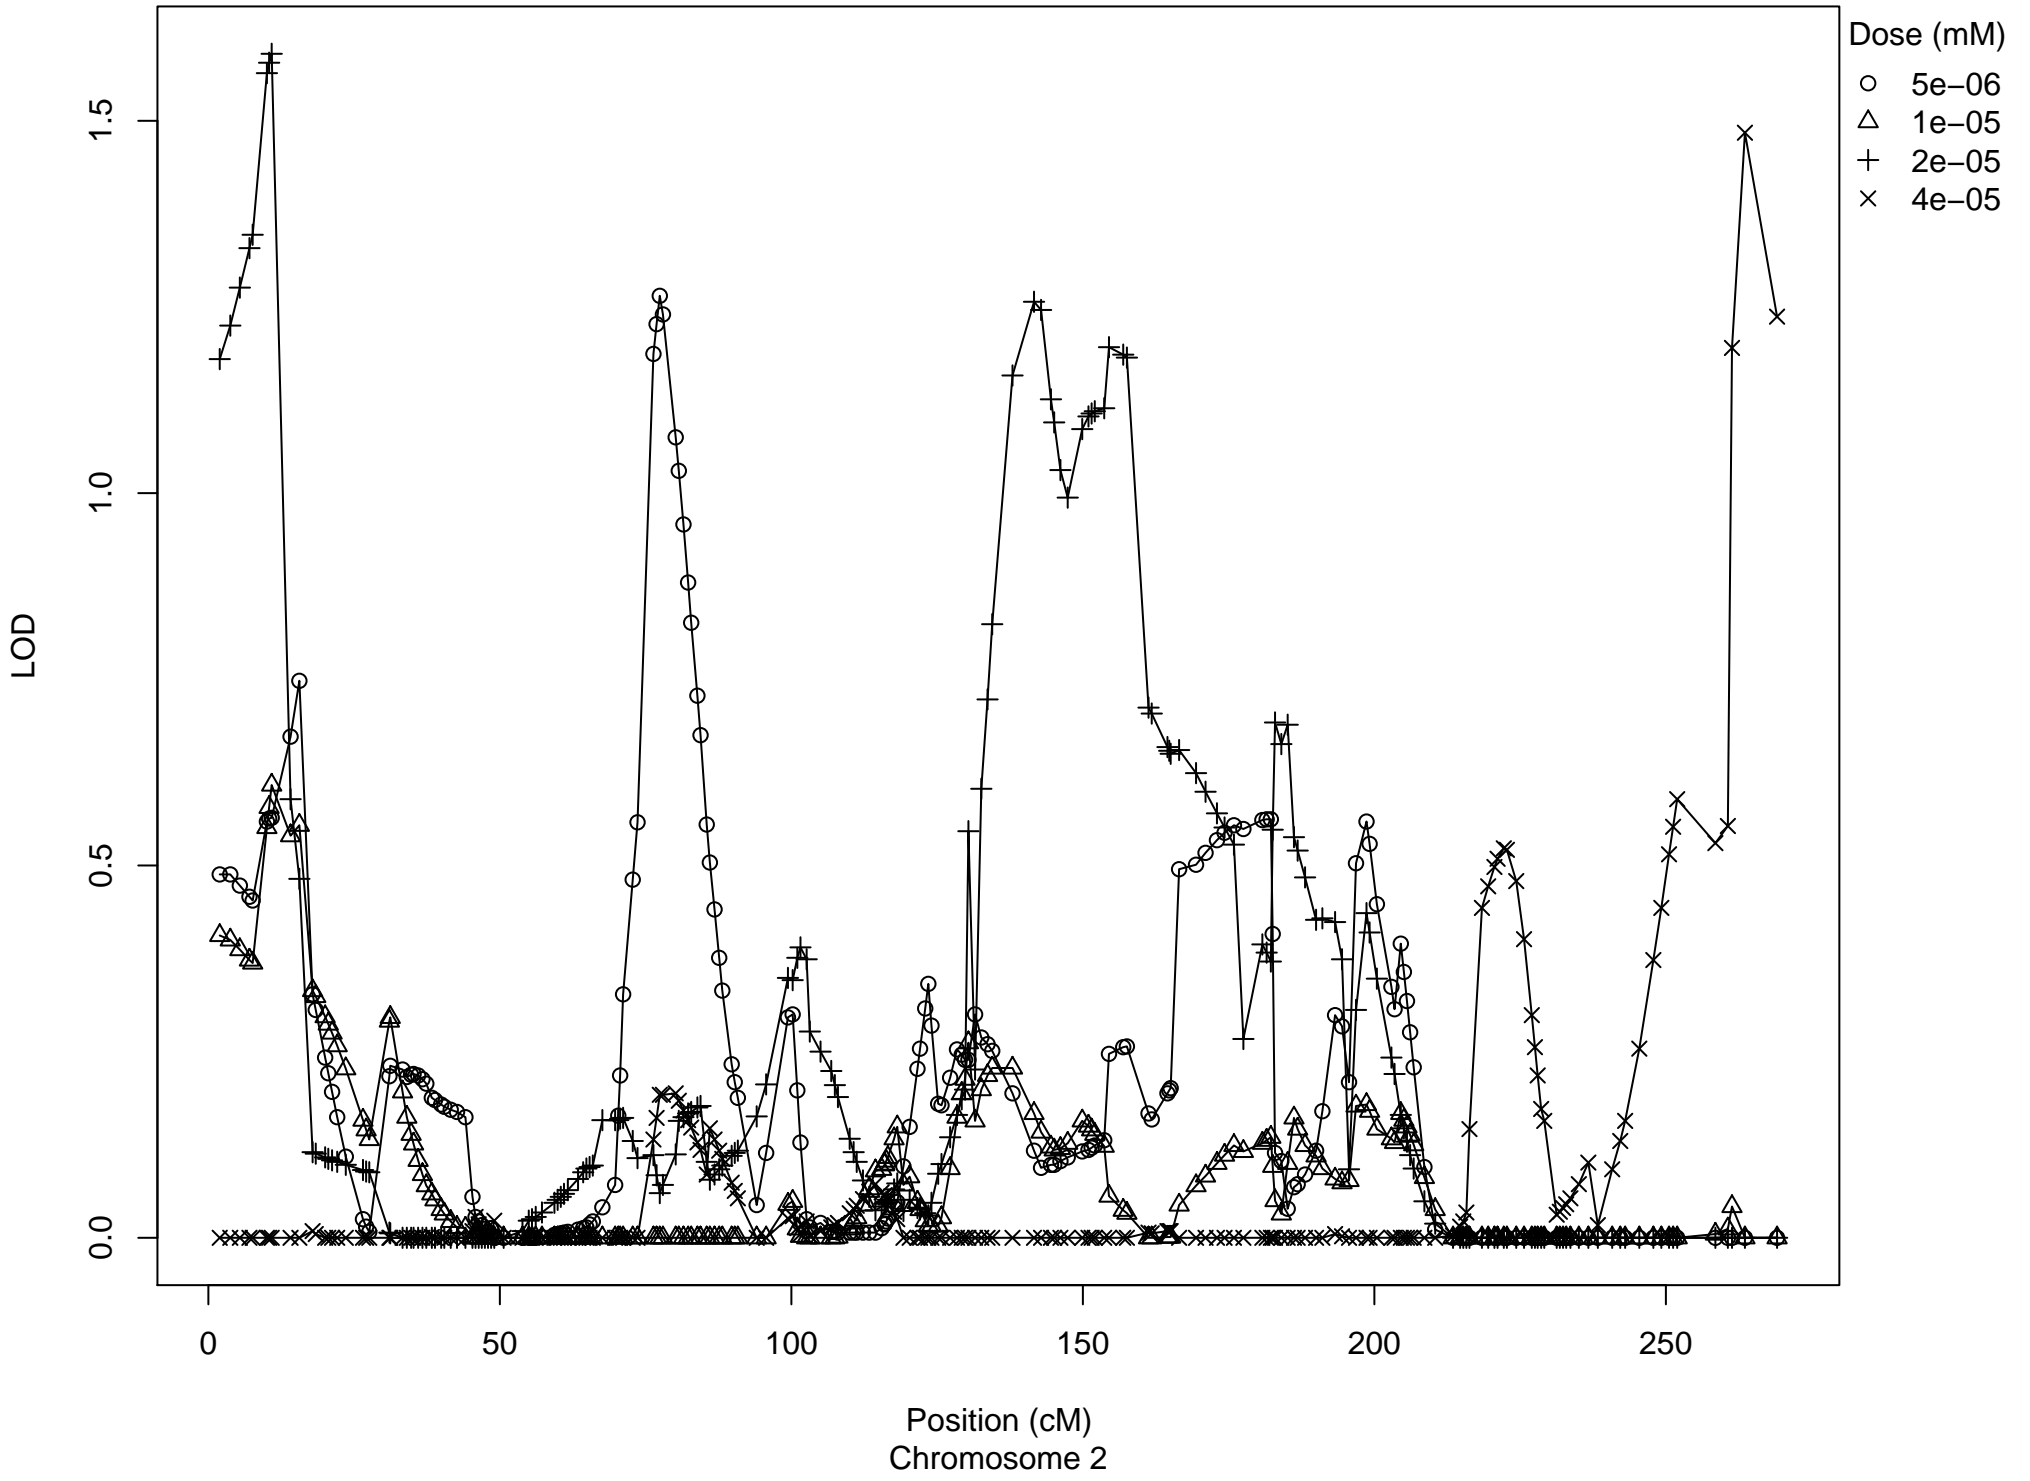

# Vinblastine Sulfate Salt (Vinb)

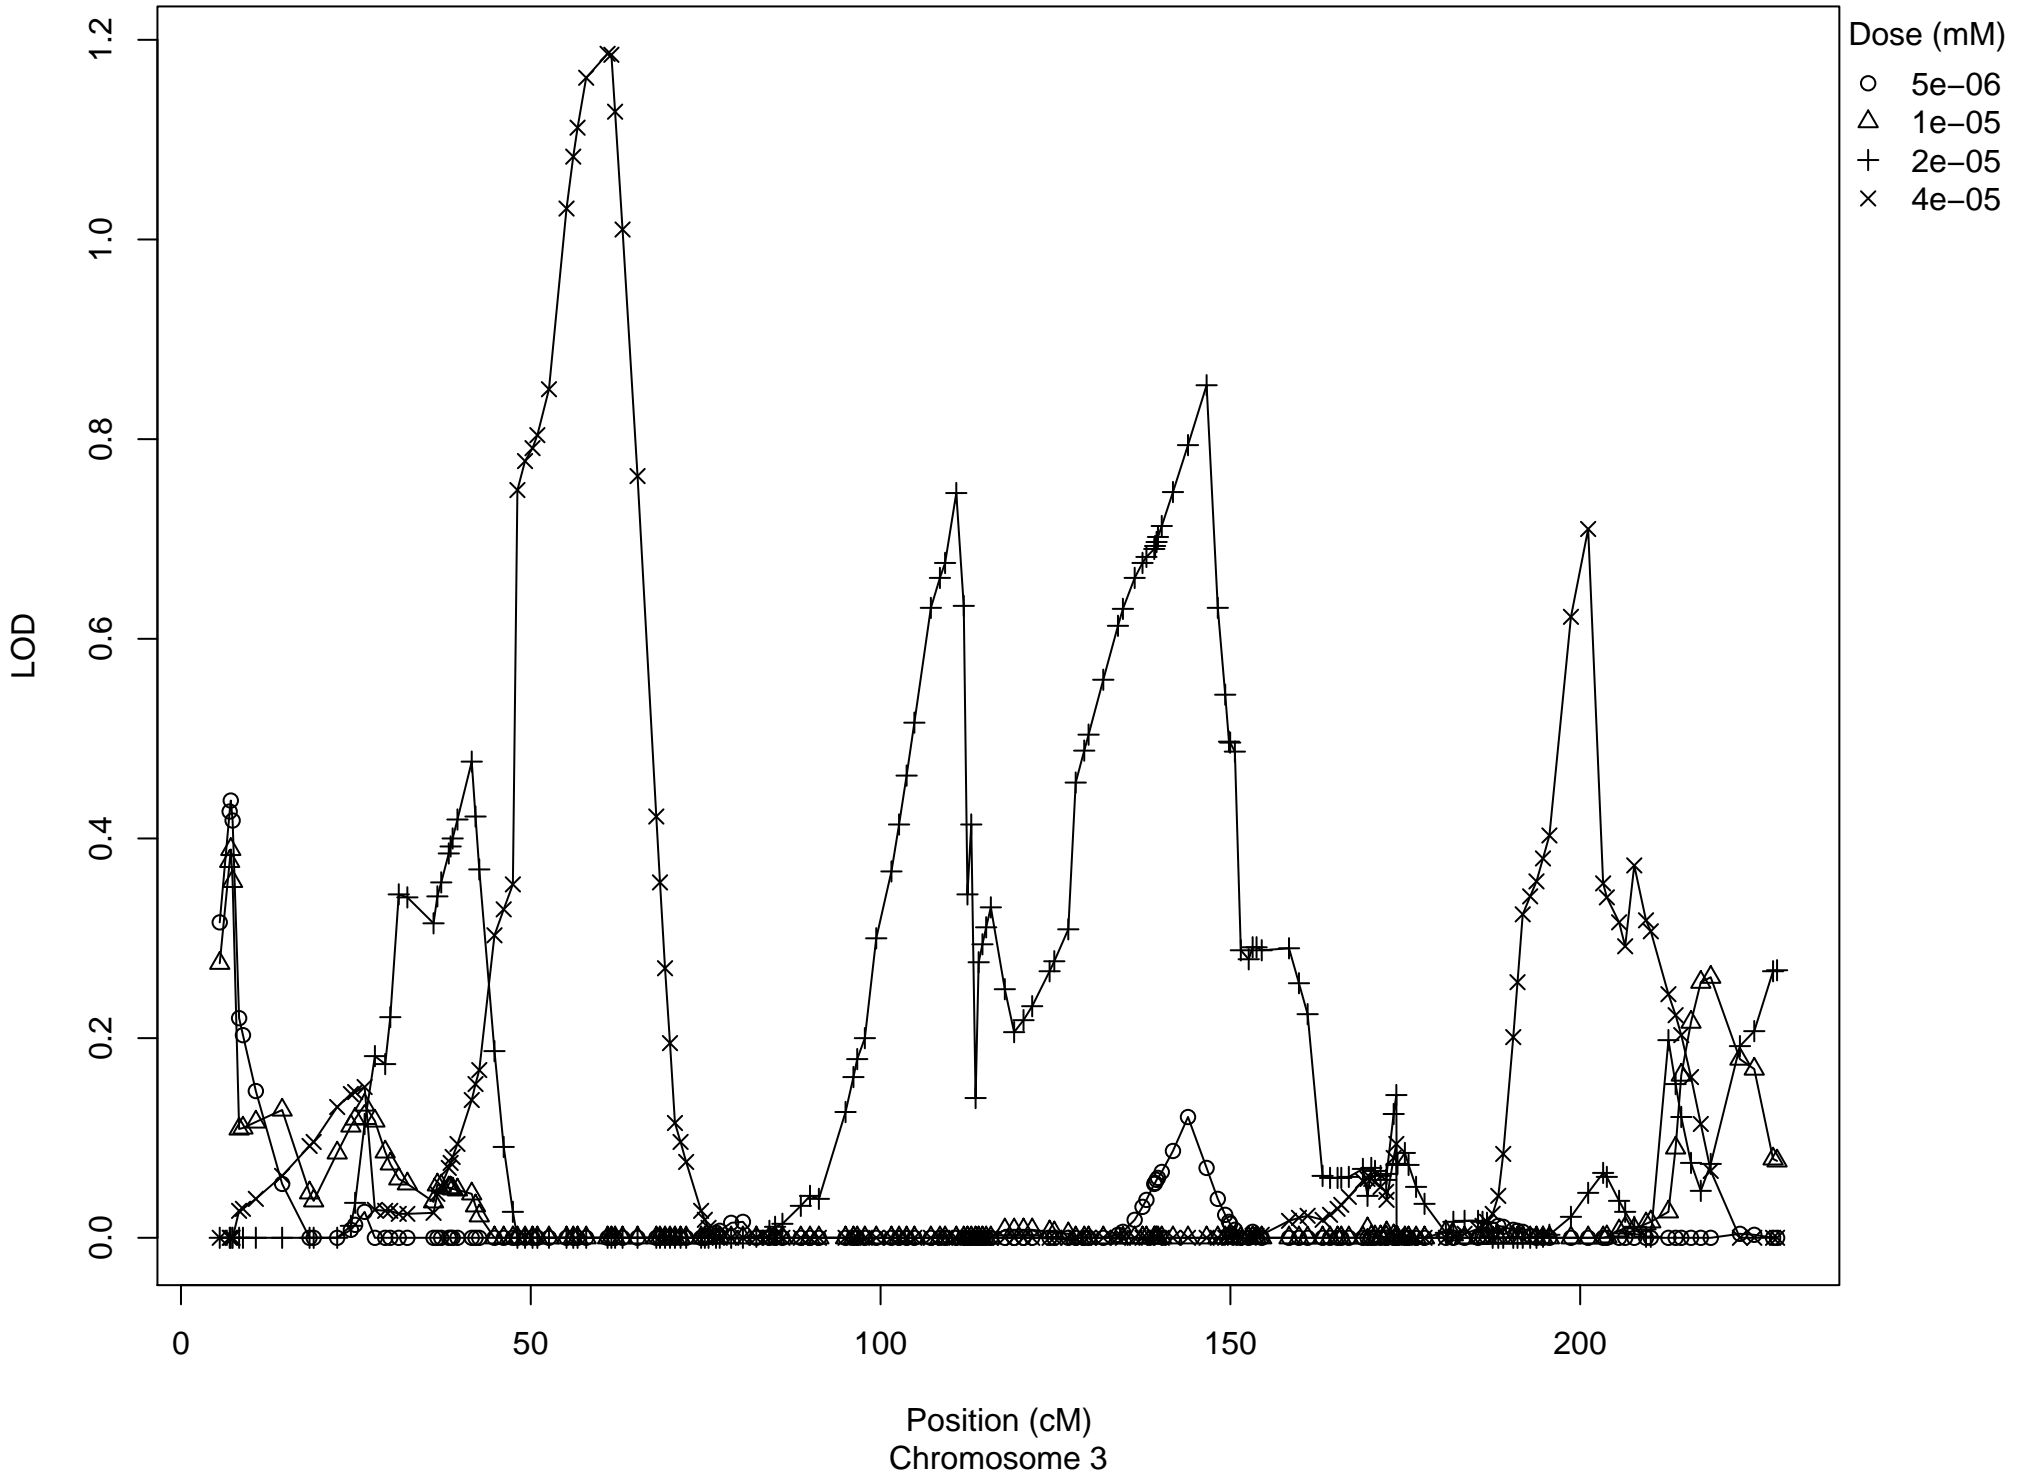

# Vinblastine Sulfate Salt (Vinb)

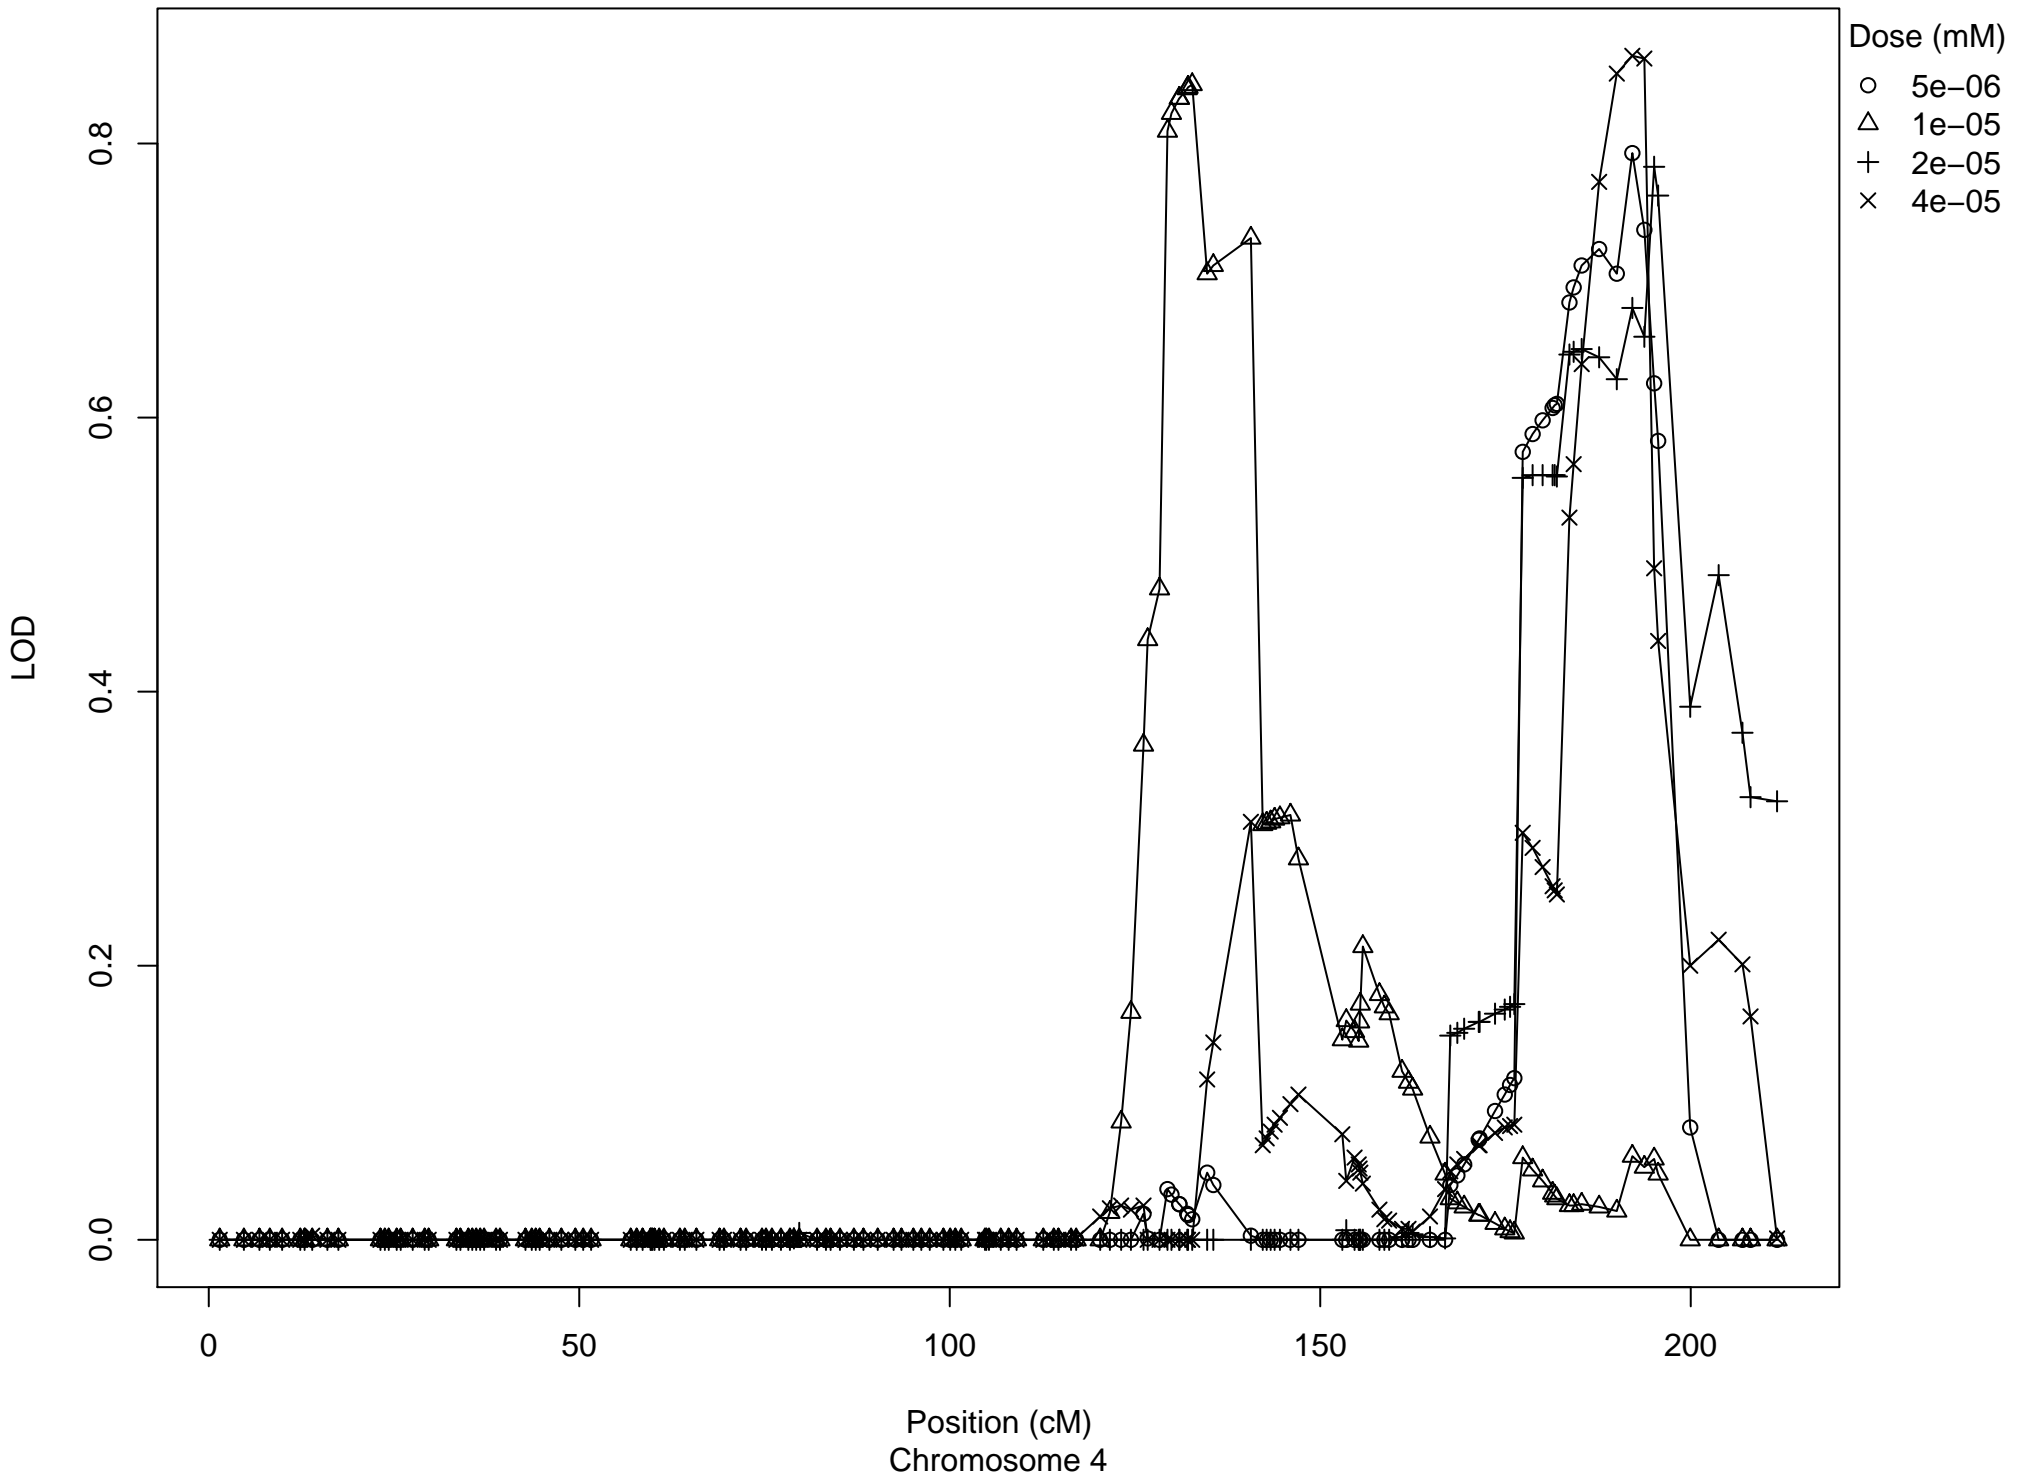



# Vinblastine Sulfate Salt (Vinb)

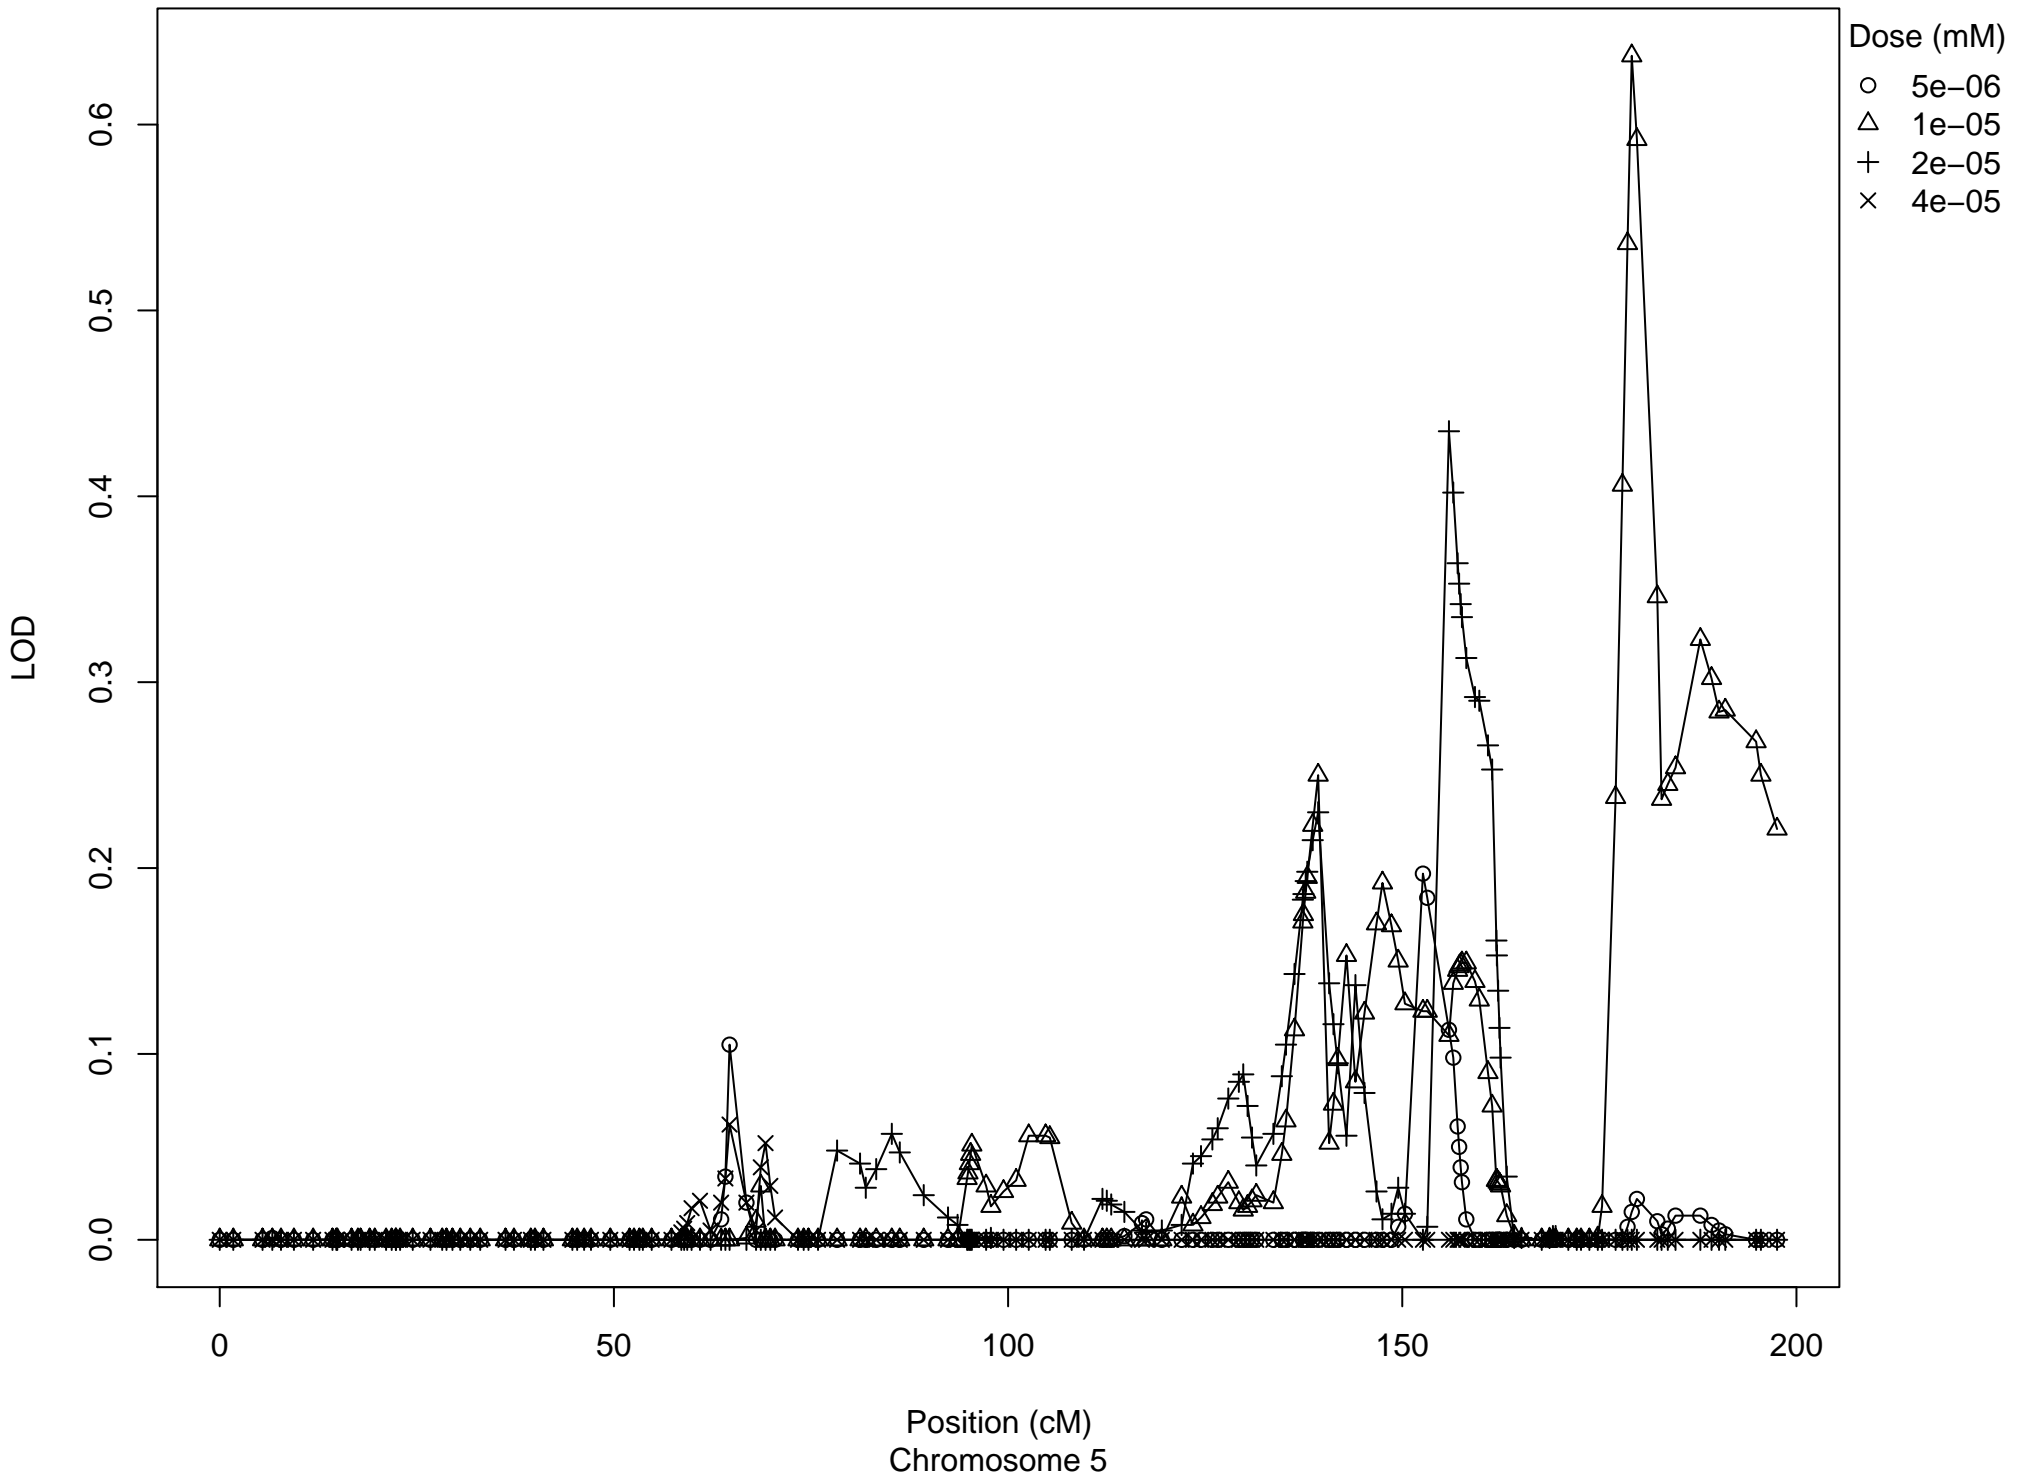

# Vinblastine Sulfate Salt (Vinb)

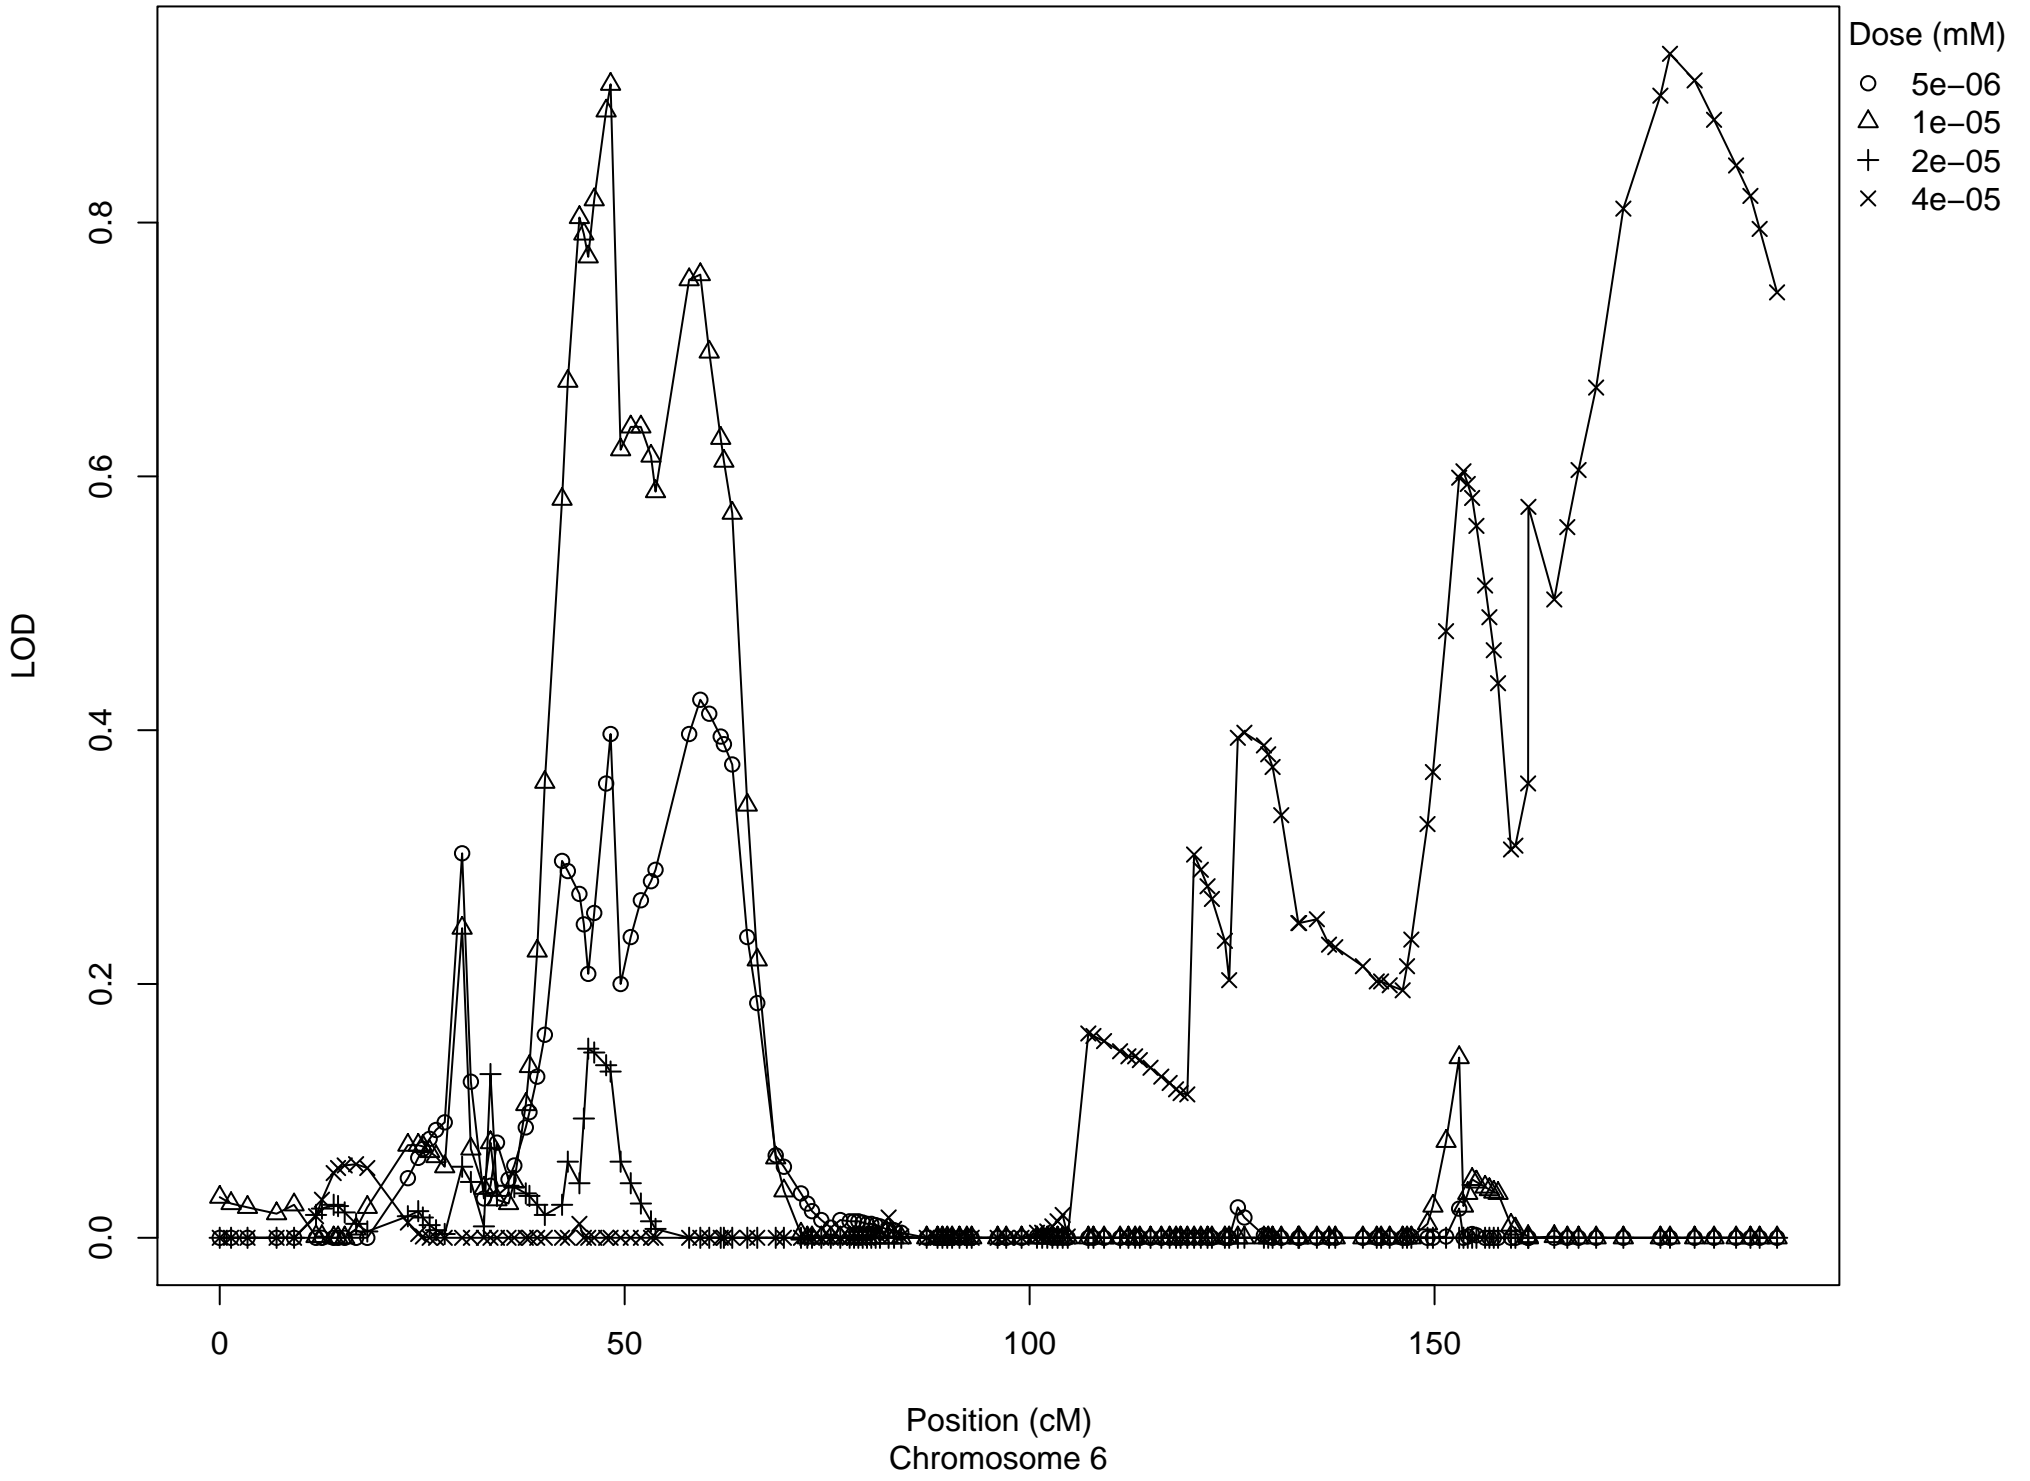

# Vinblastine Sulfate Salt (Vinb)

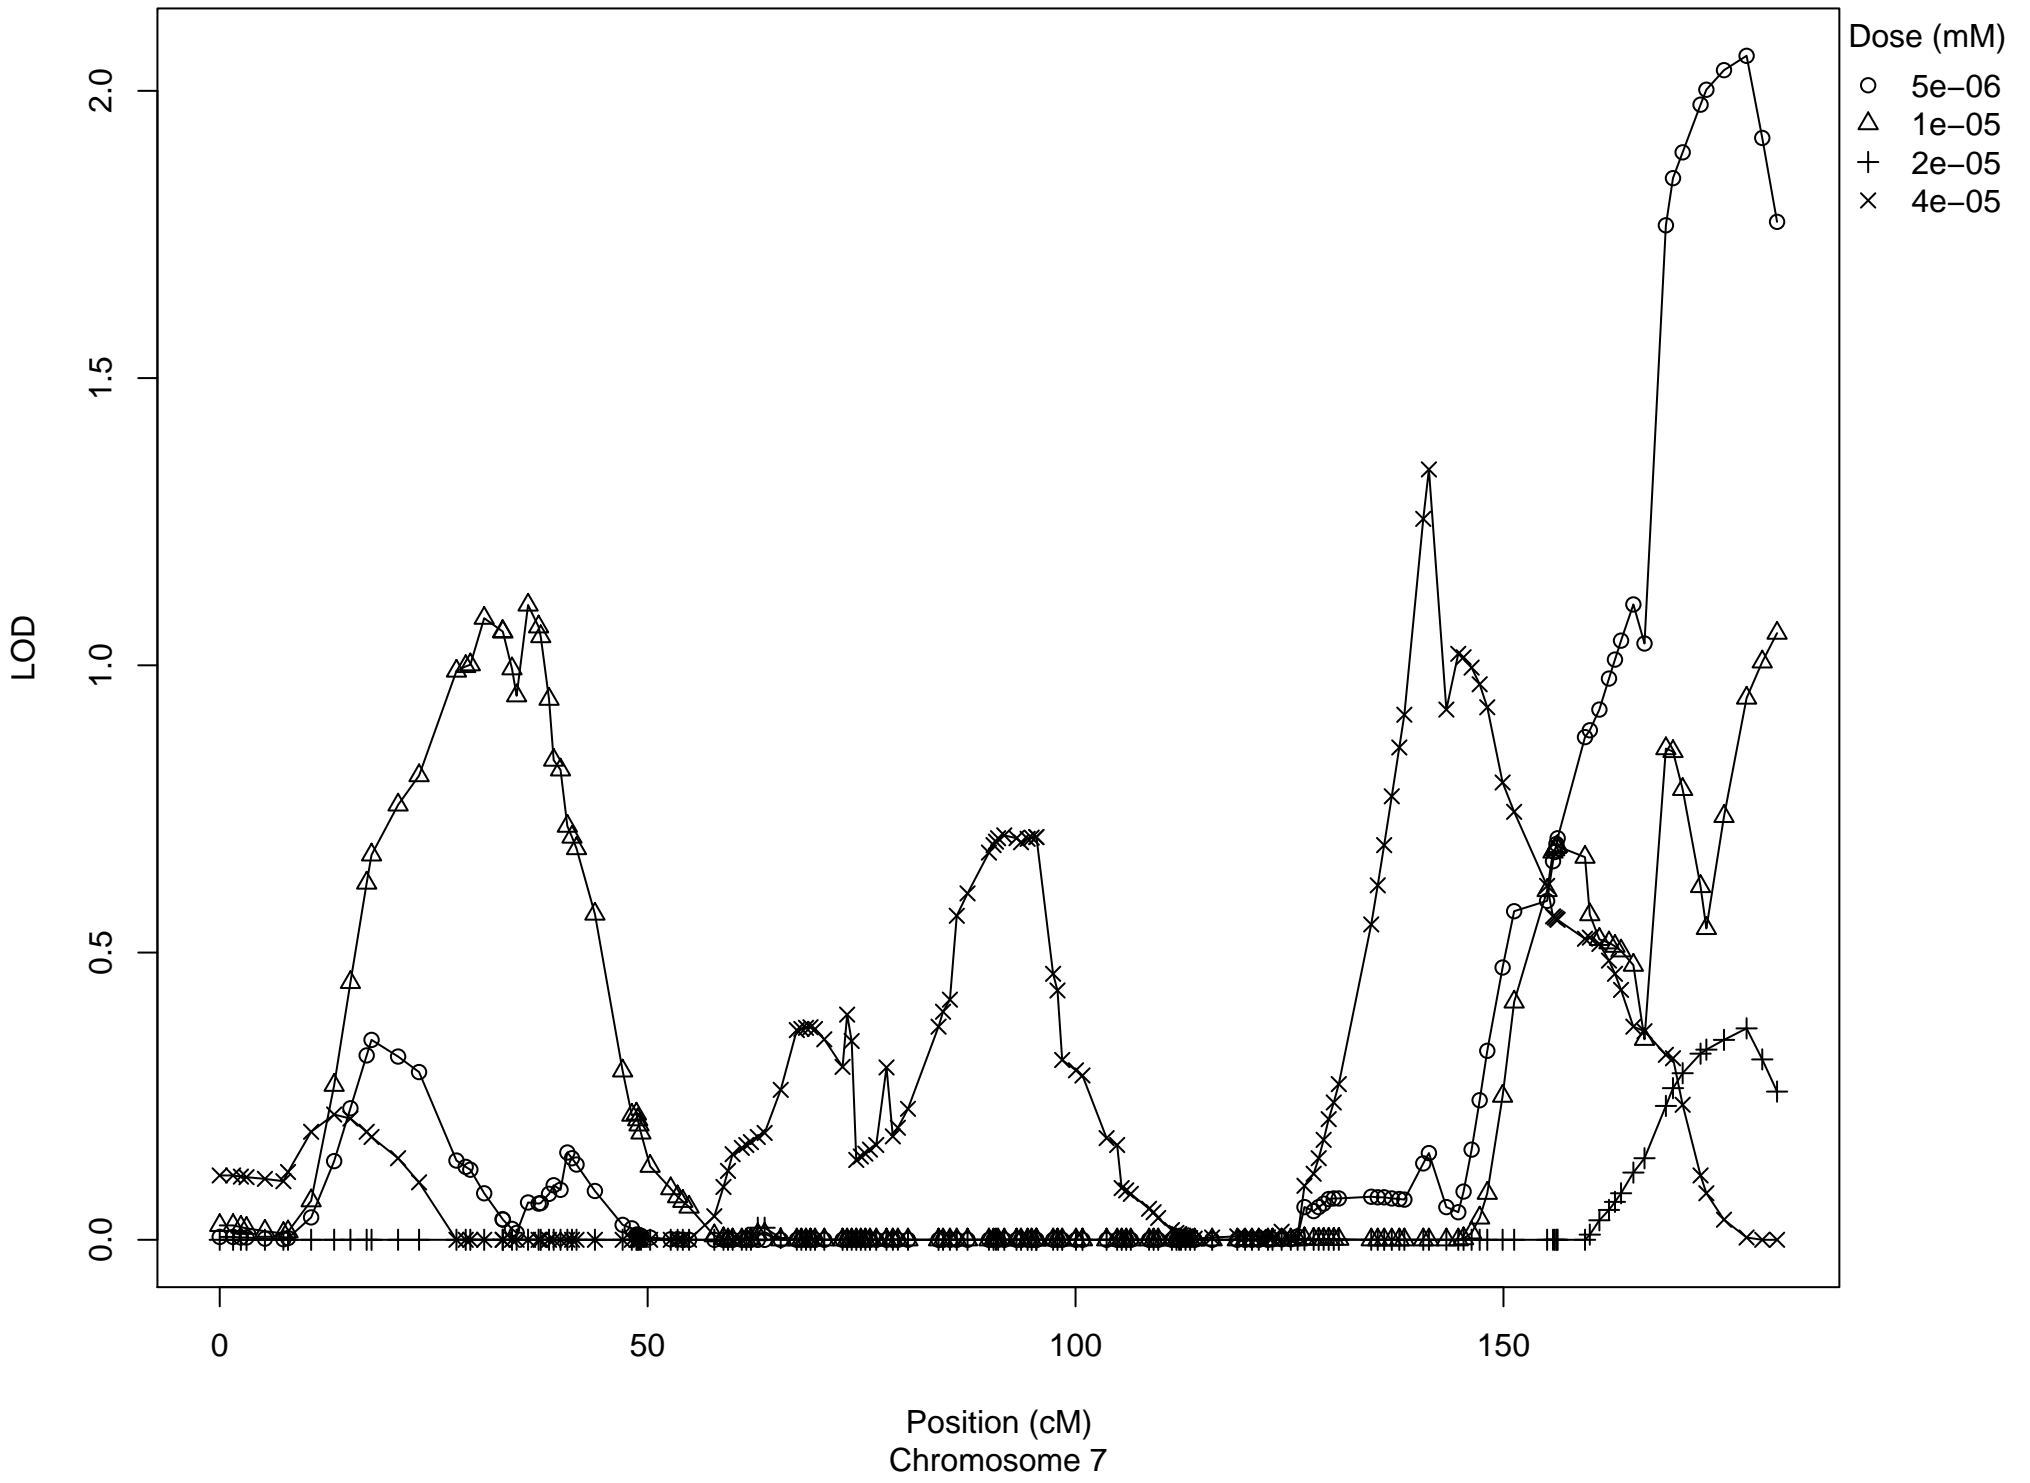

# Vinblastine Sulfate Salt (Vinb)

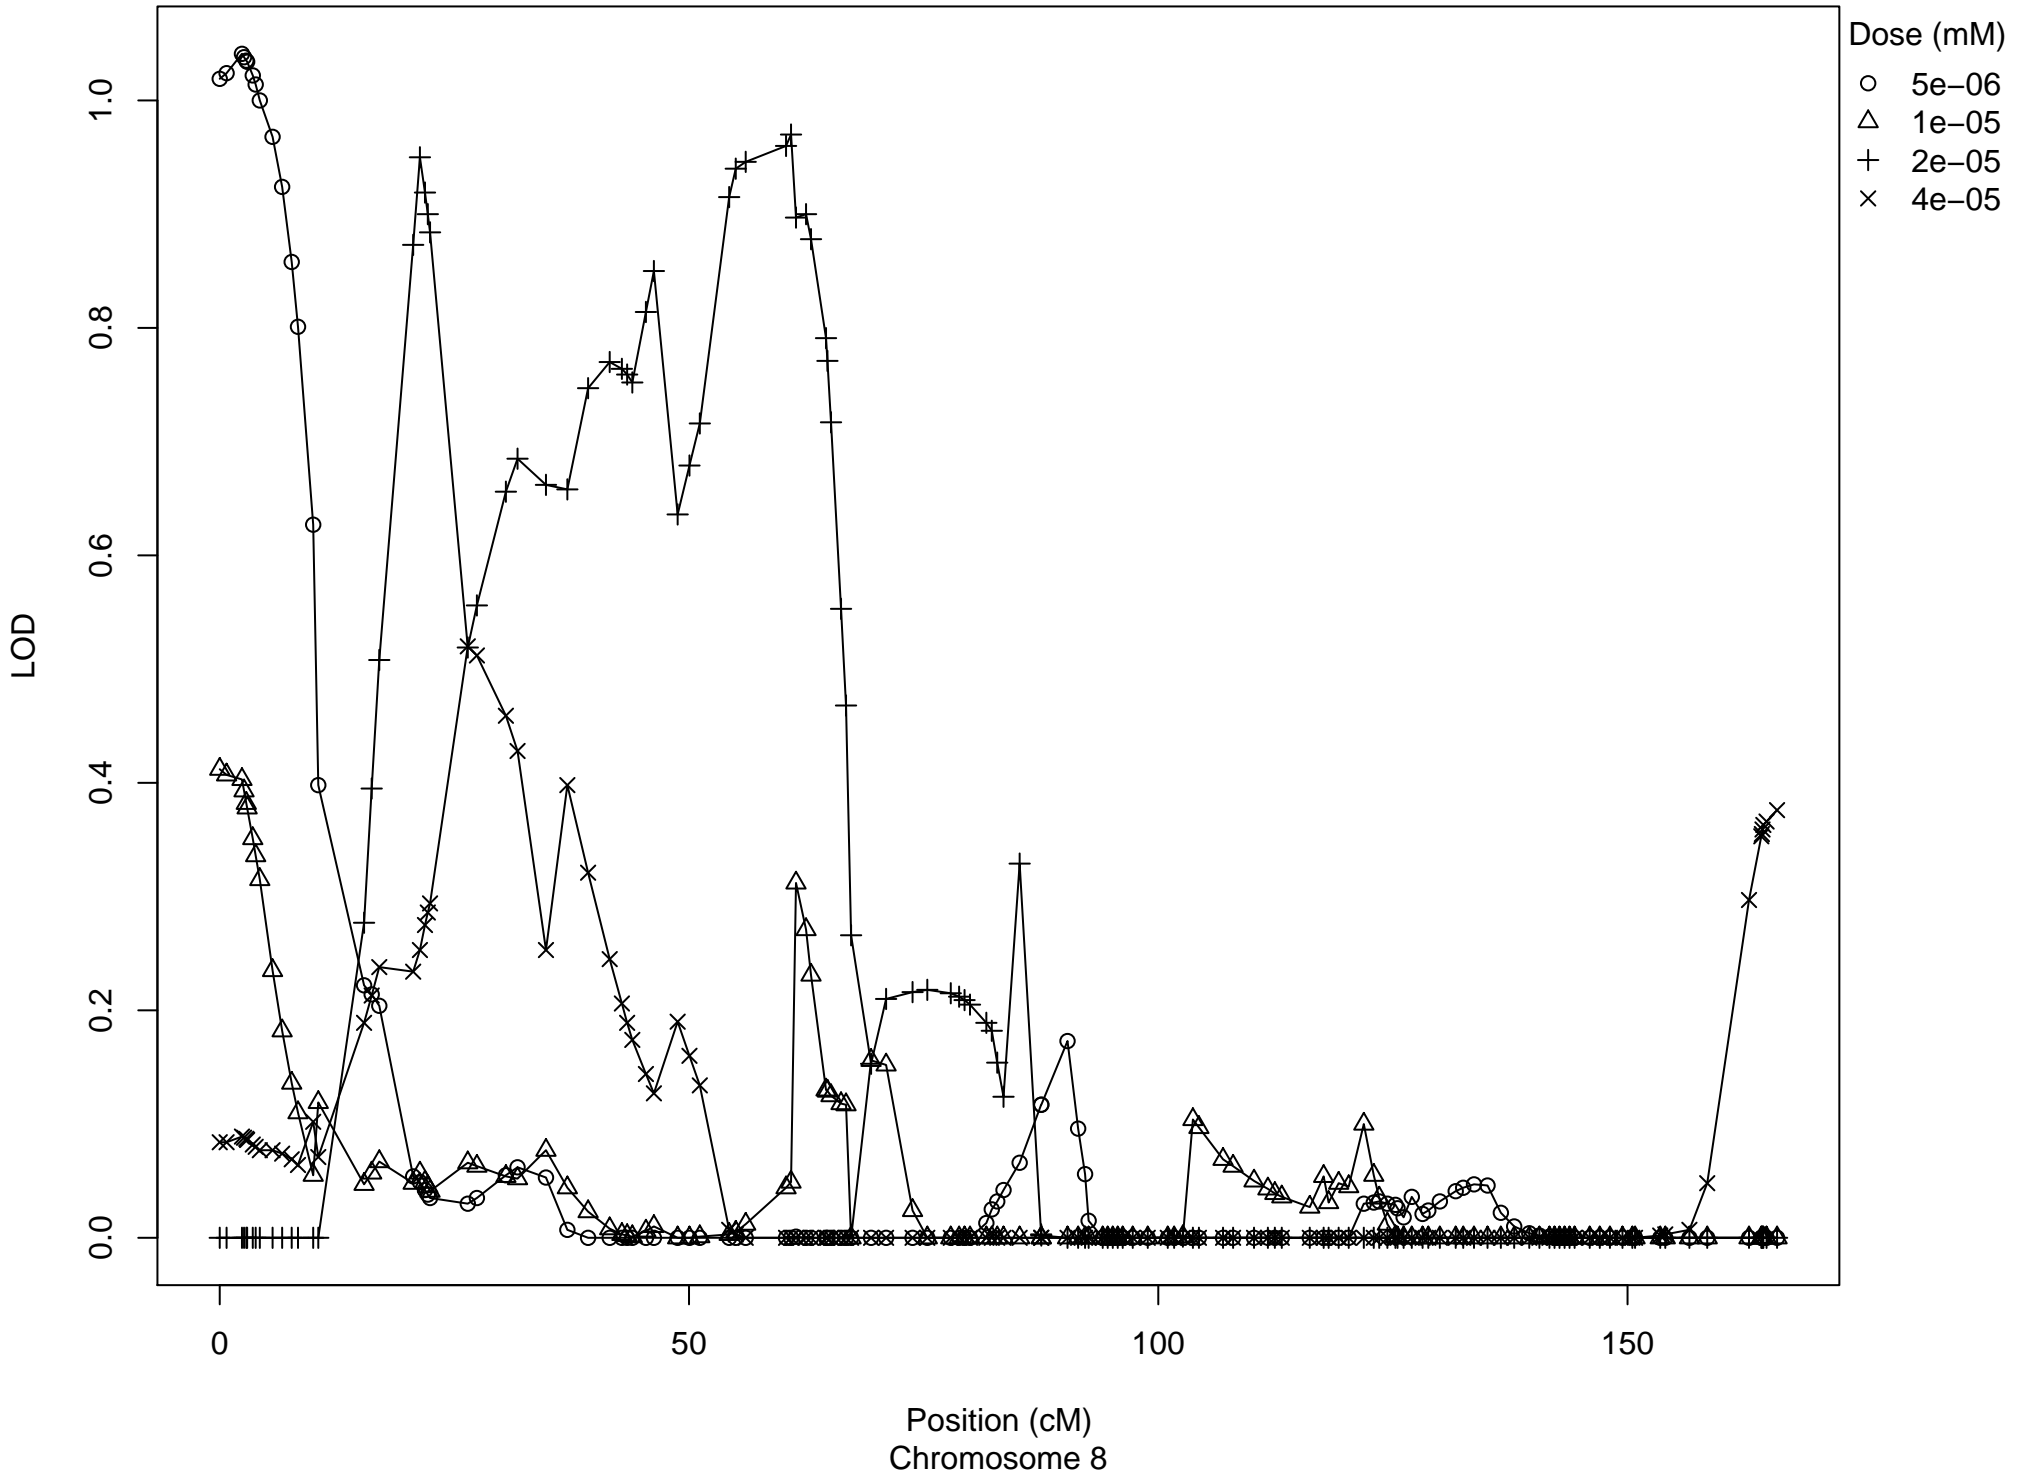

# Vinblastine Sulfate Salt (Vinb)

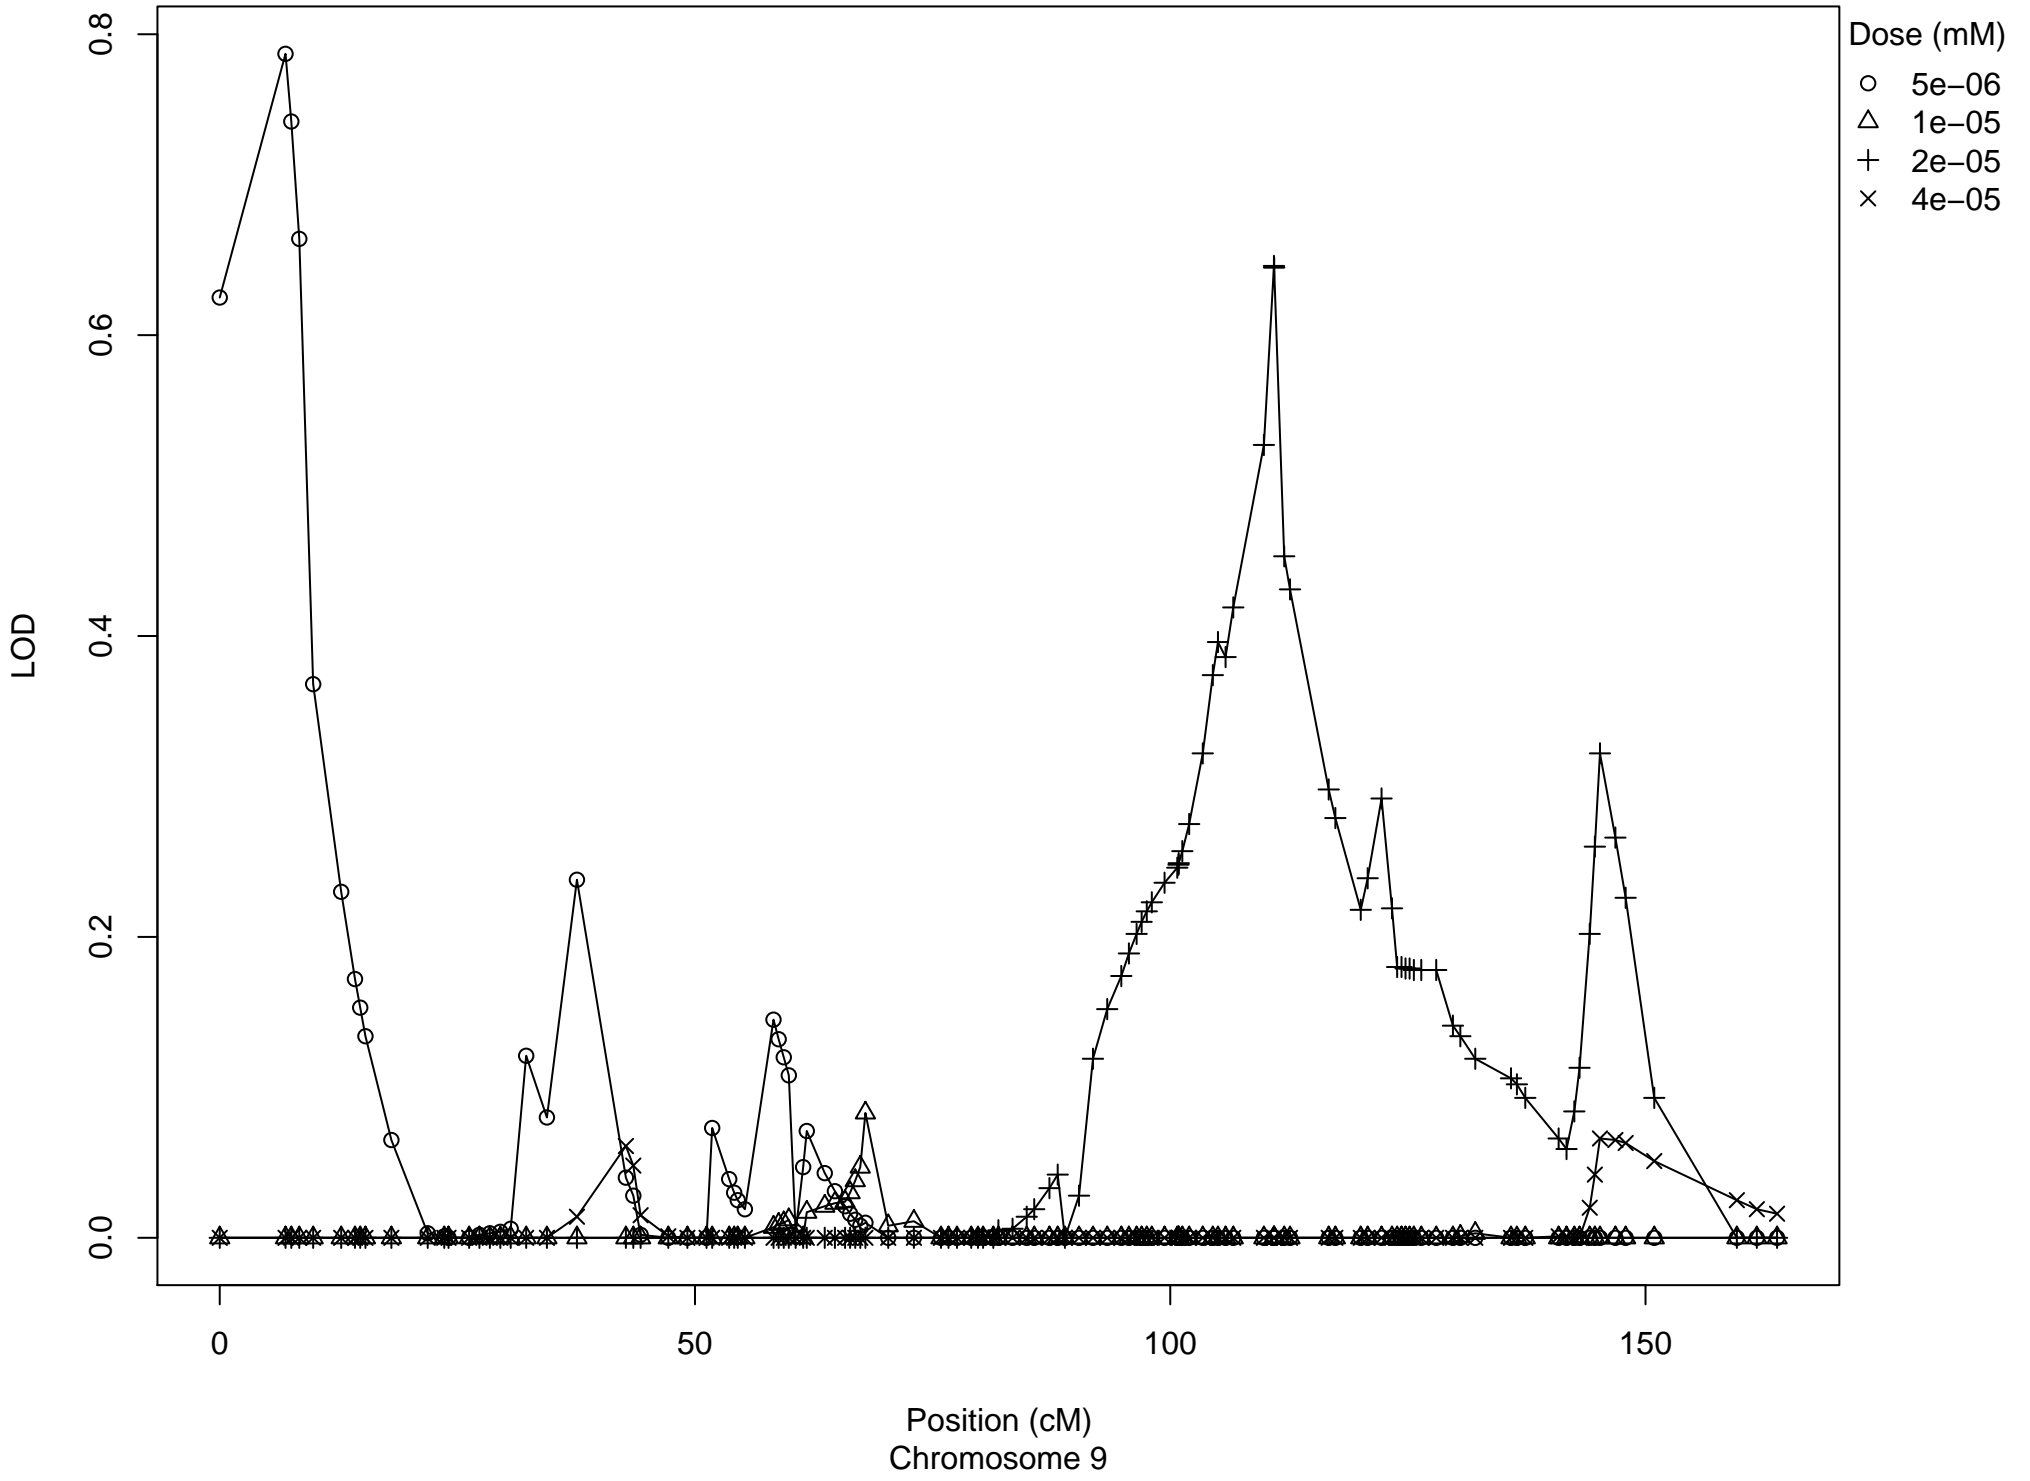

# Vinblastine Sulfate Salt (Vinb)

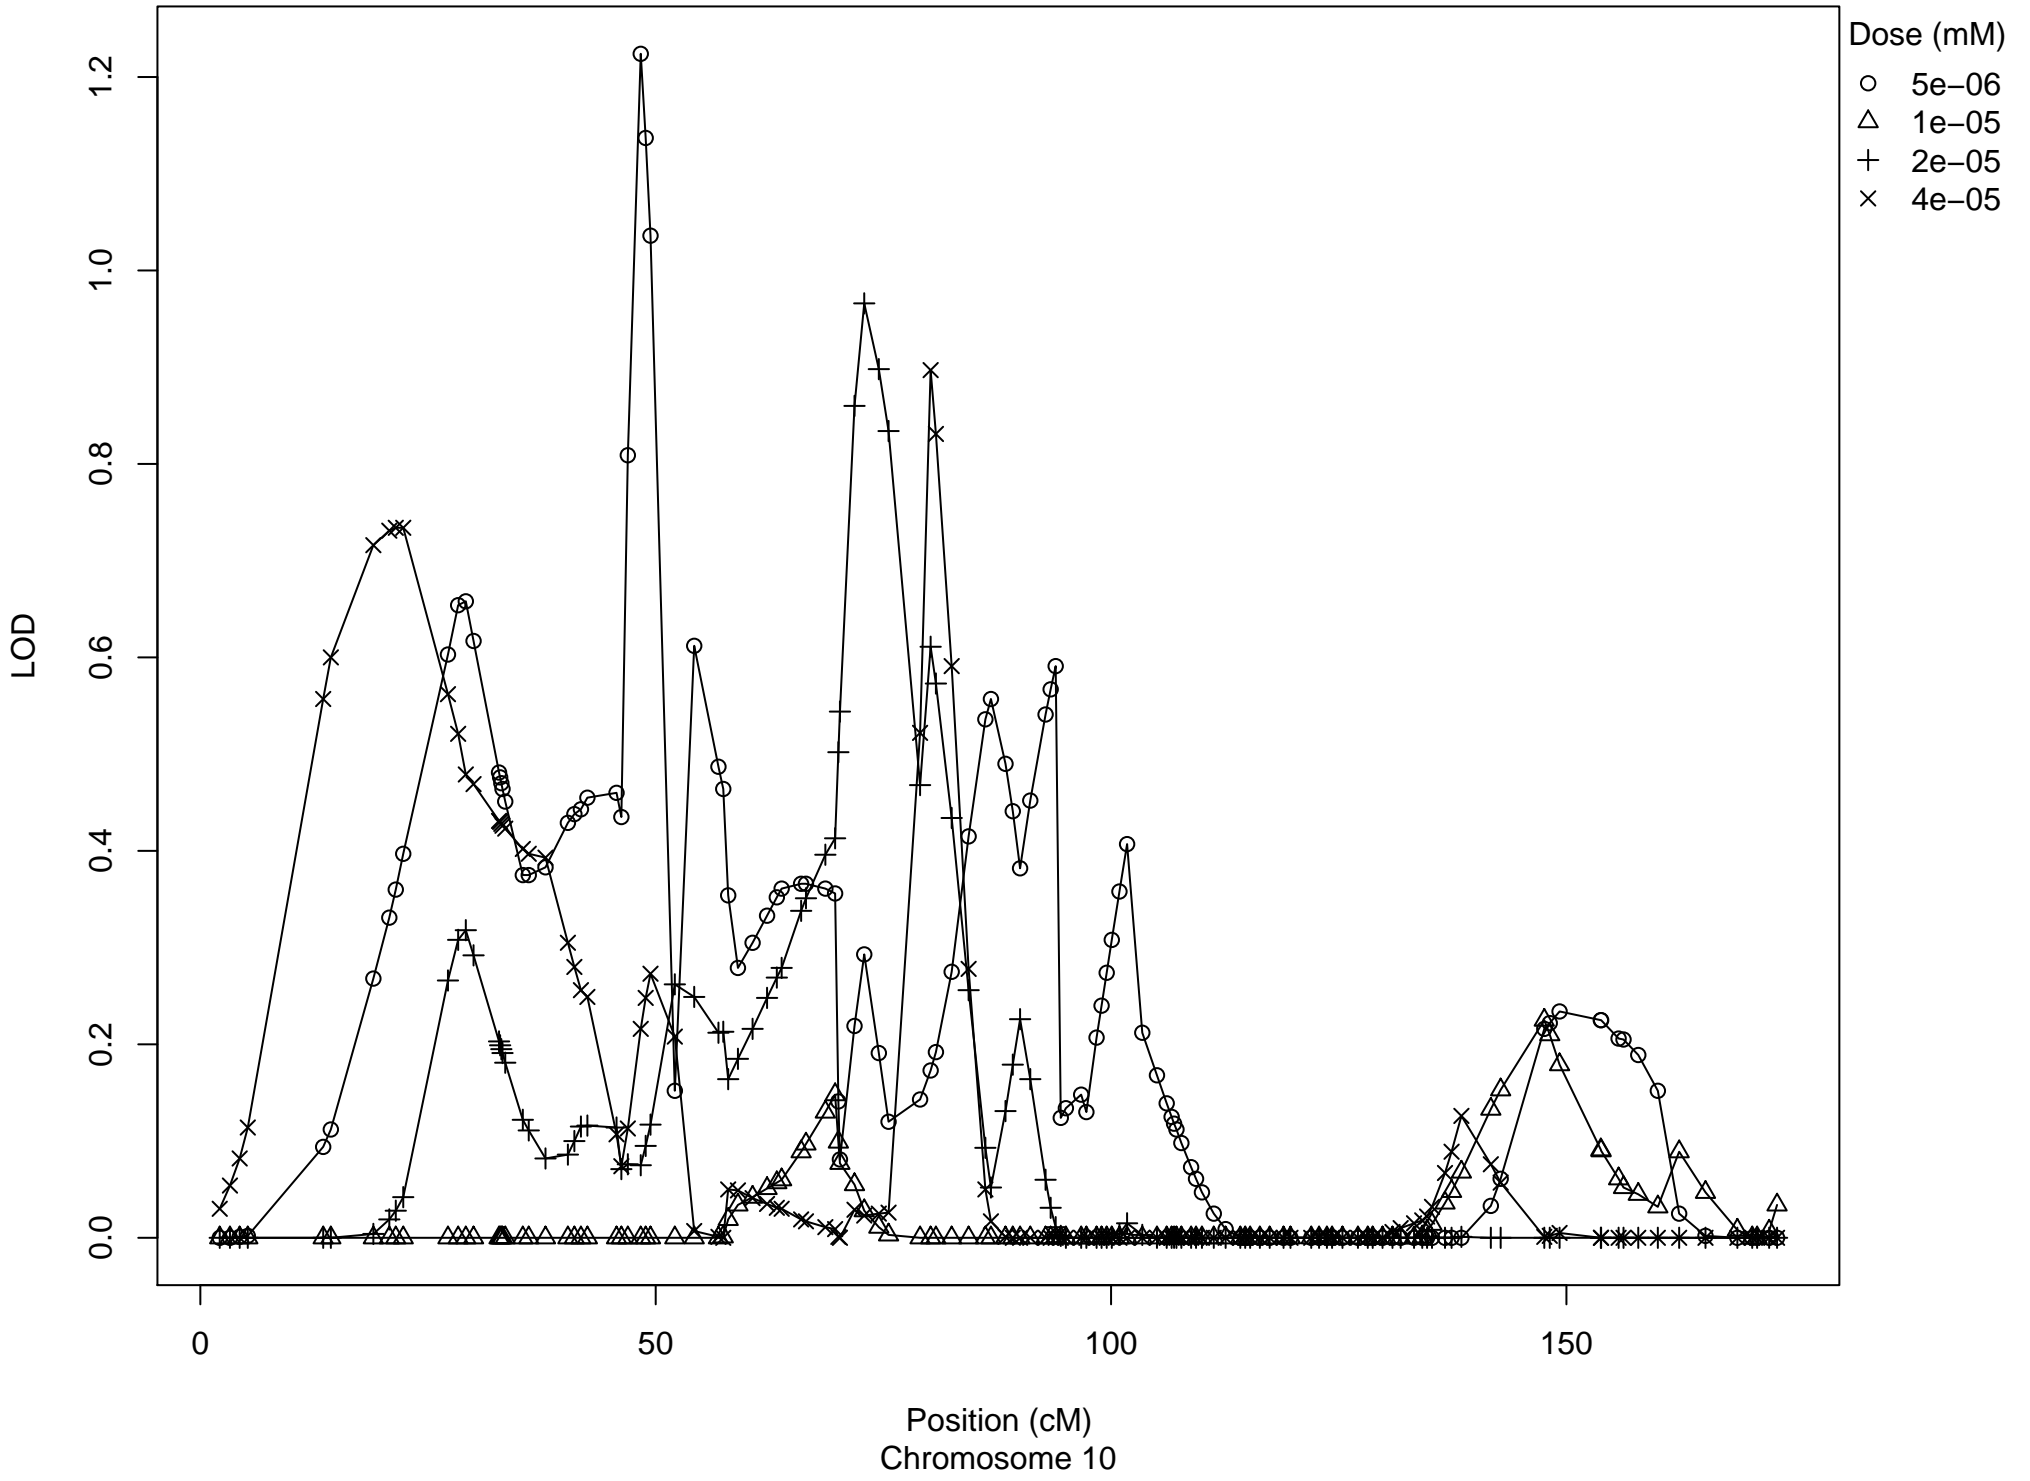

# Vinblastine Sulfate Salt (Vinb)

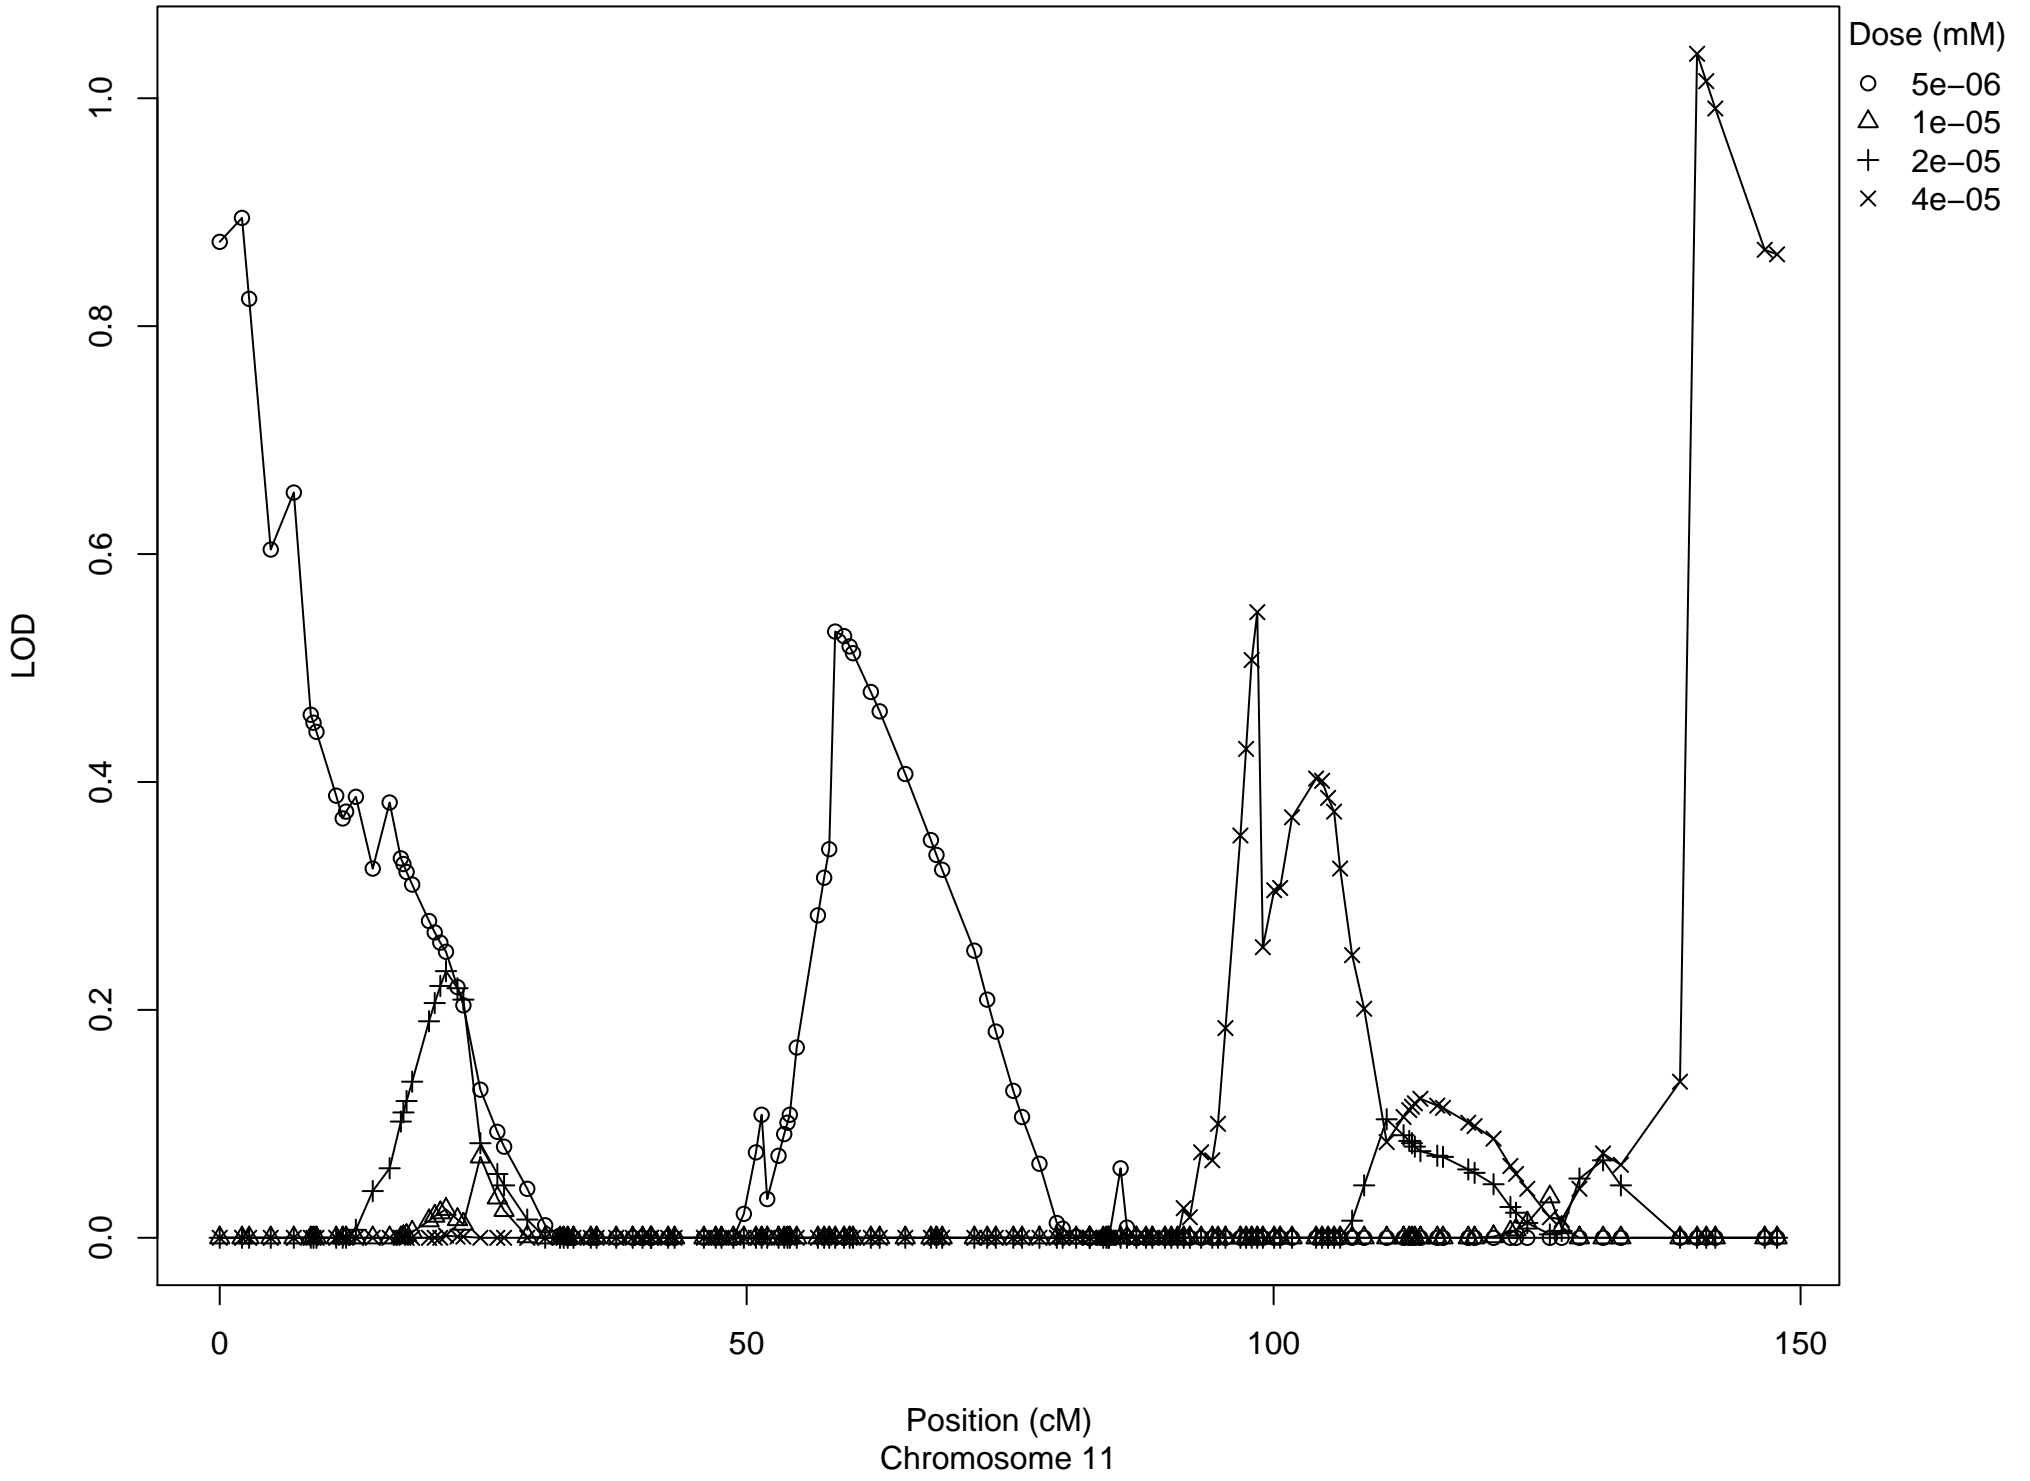

# Vinblastine Sulfate Salt (Vinb)

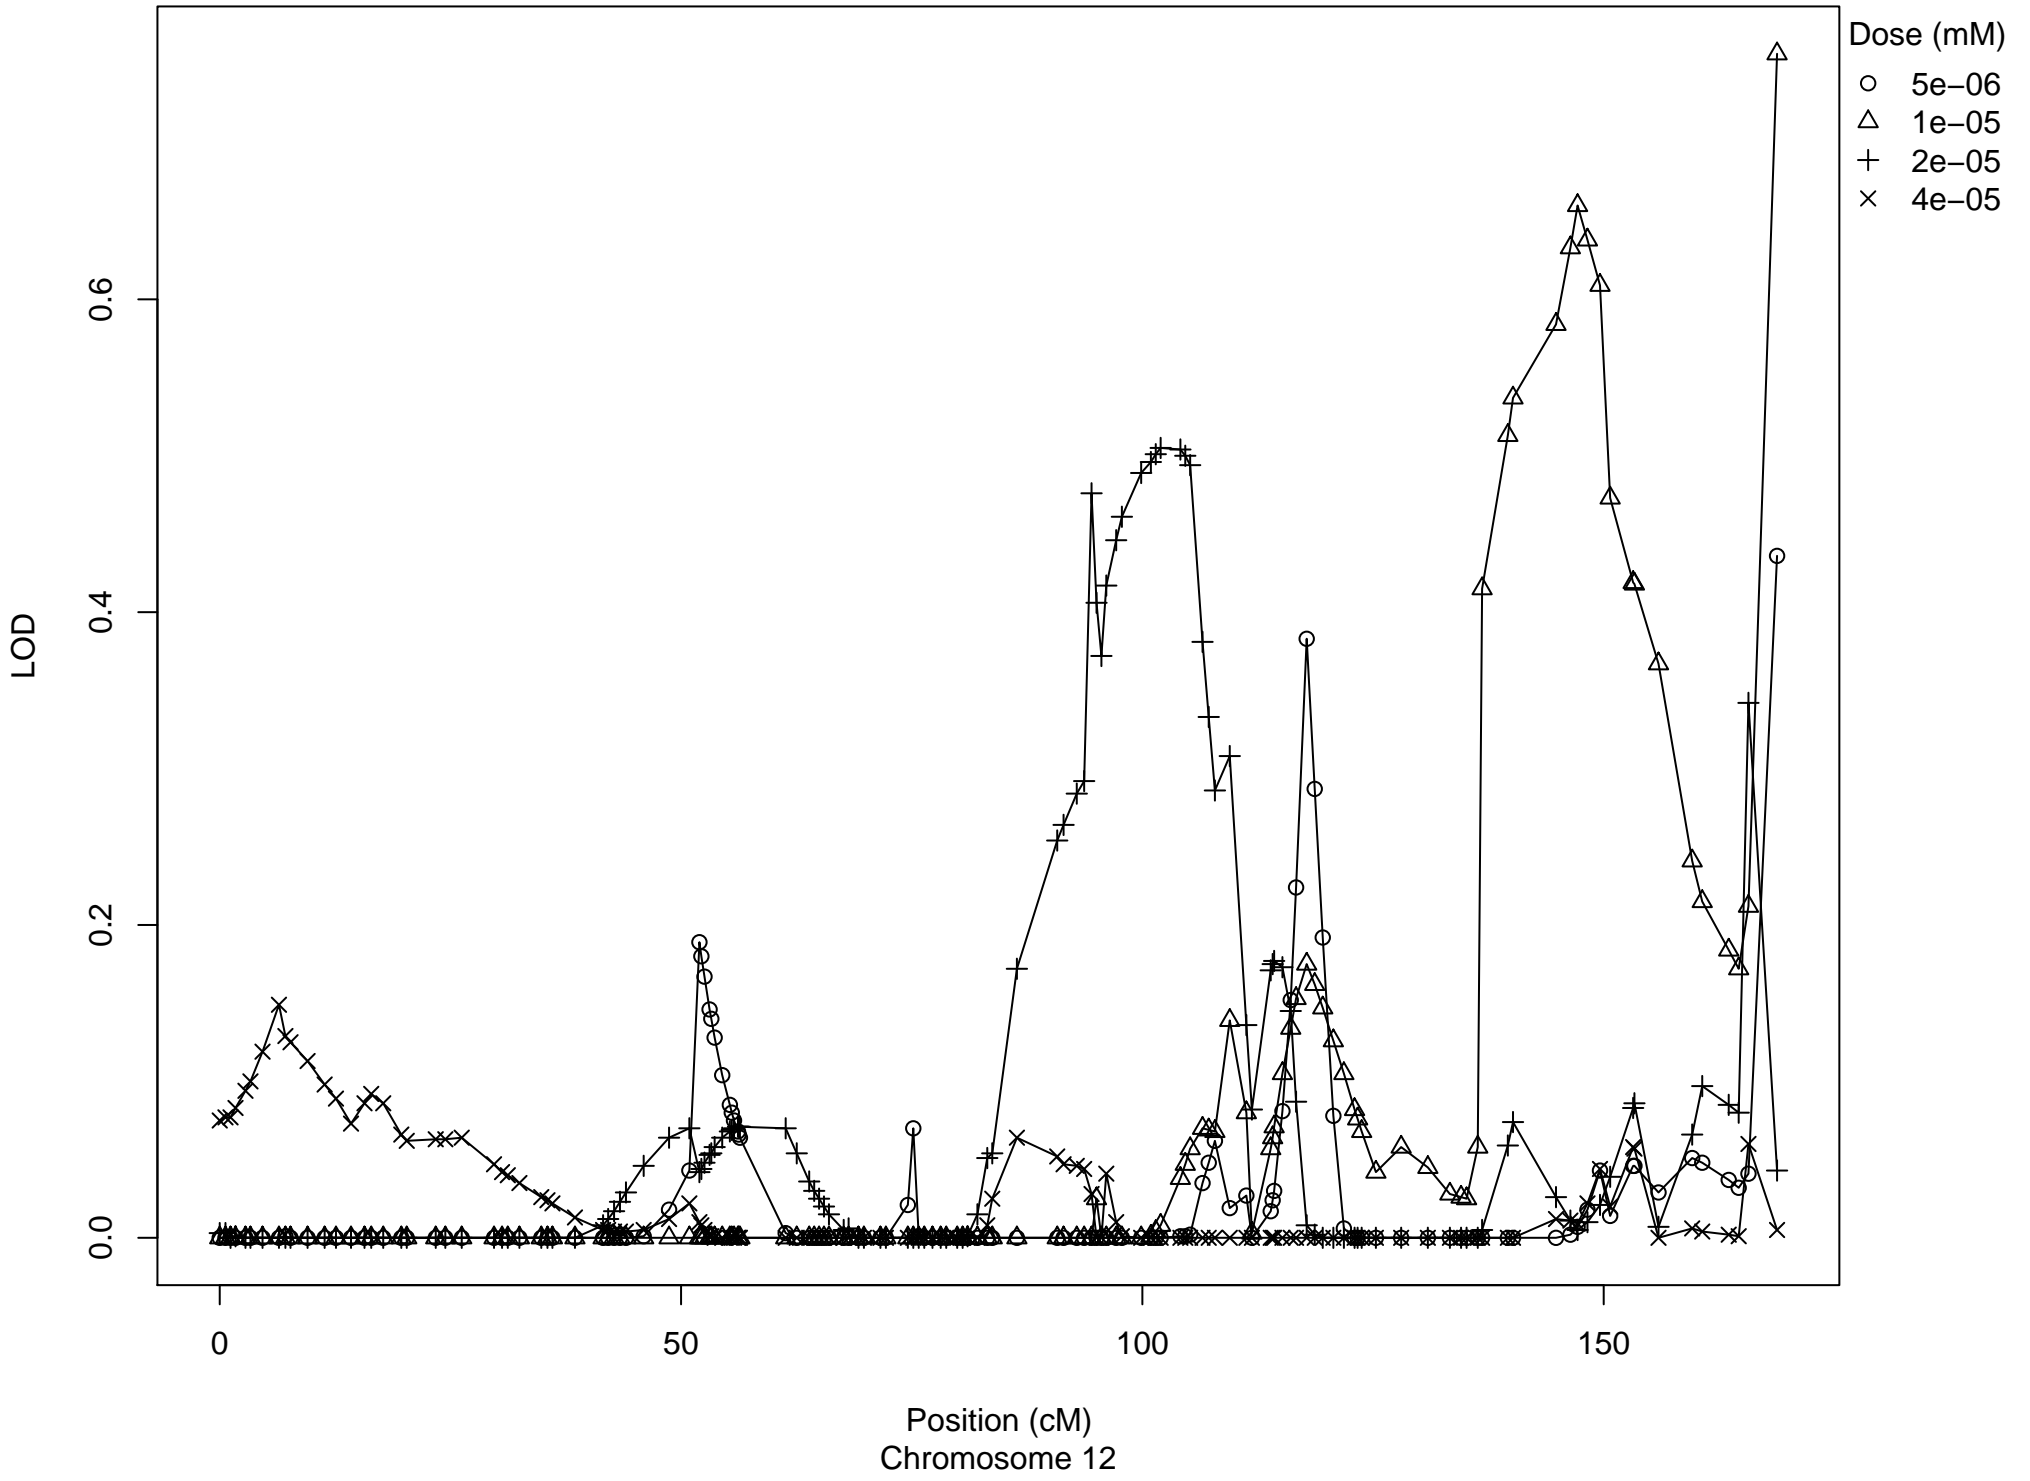



# Vinblastine Sulfate Salt (Vinb)

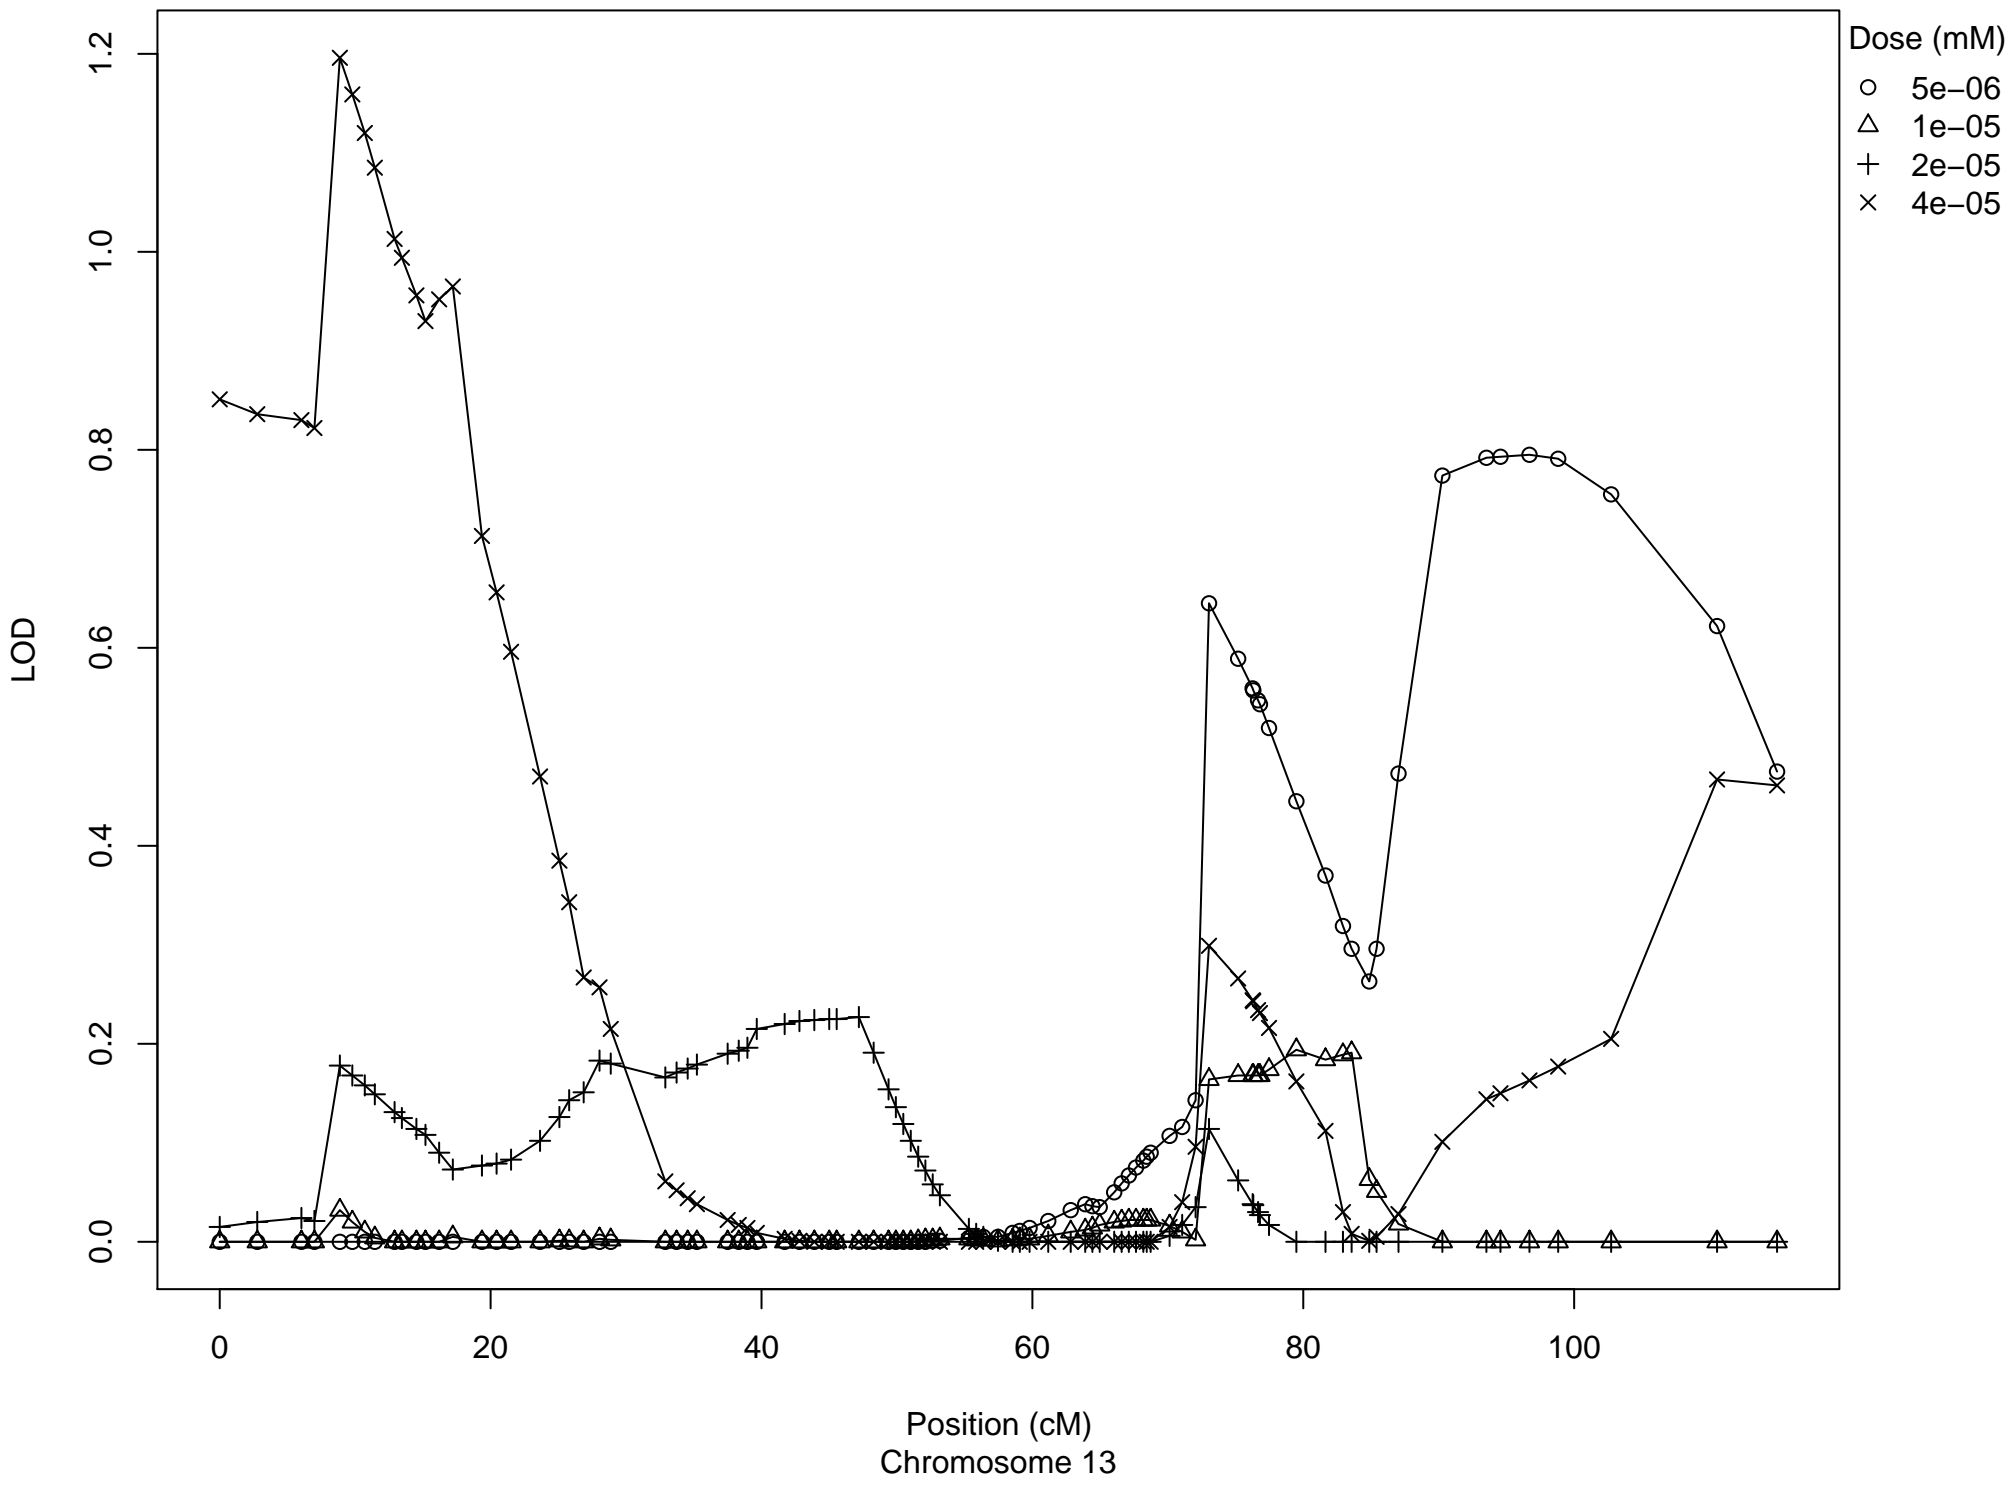

# Vinblastine Sulfate Salt (Vinb)

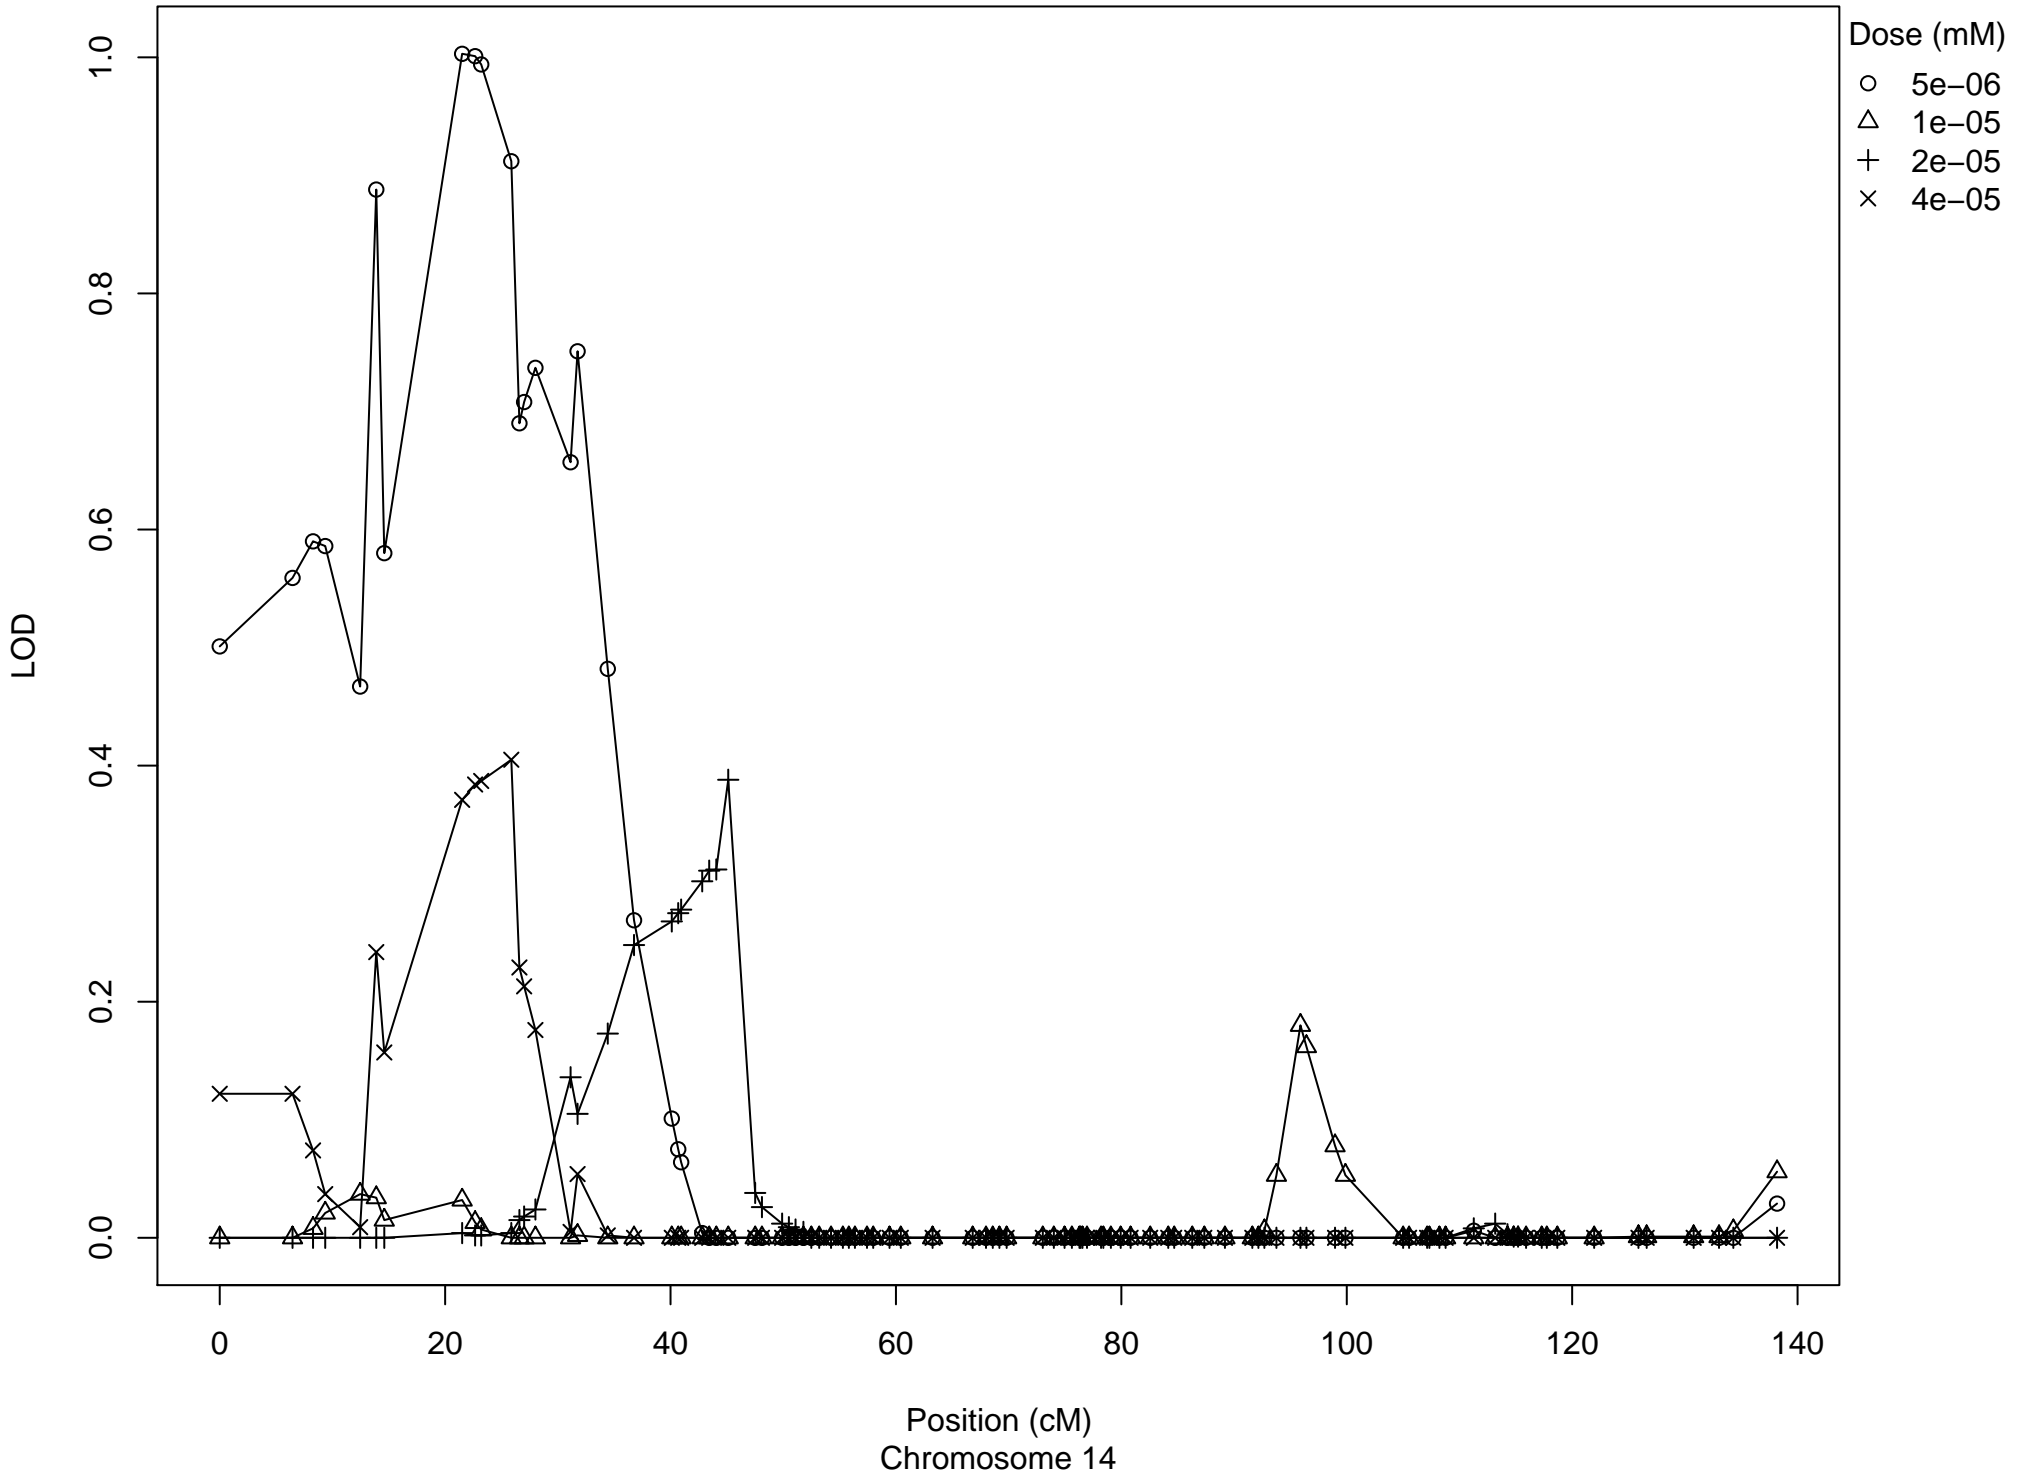

# Vinblastine Sulfate Salt (Vinb)

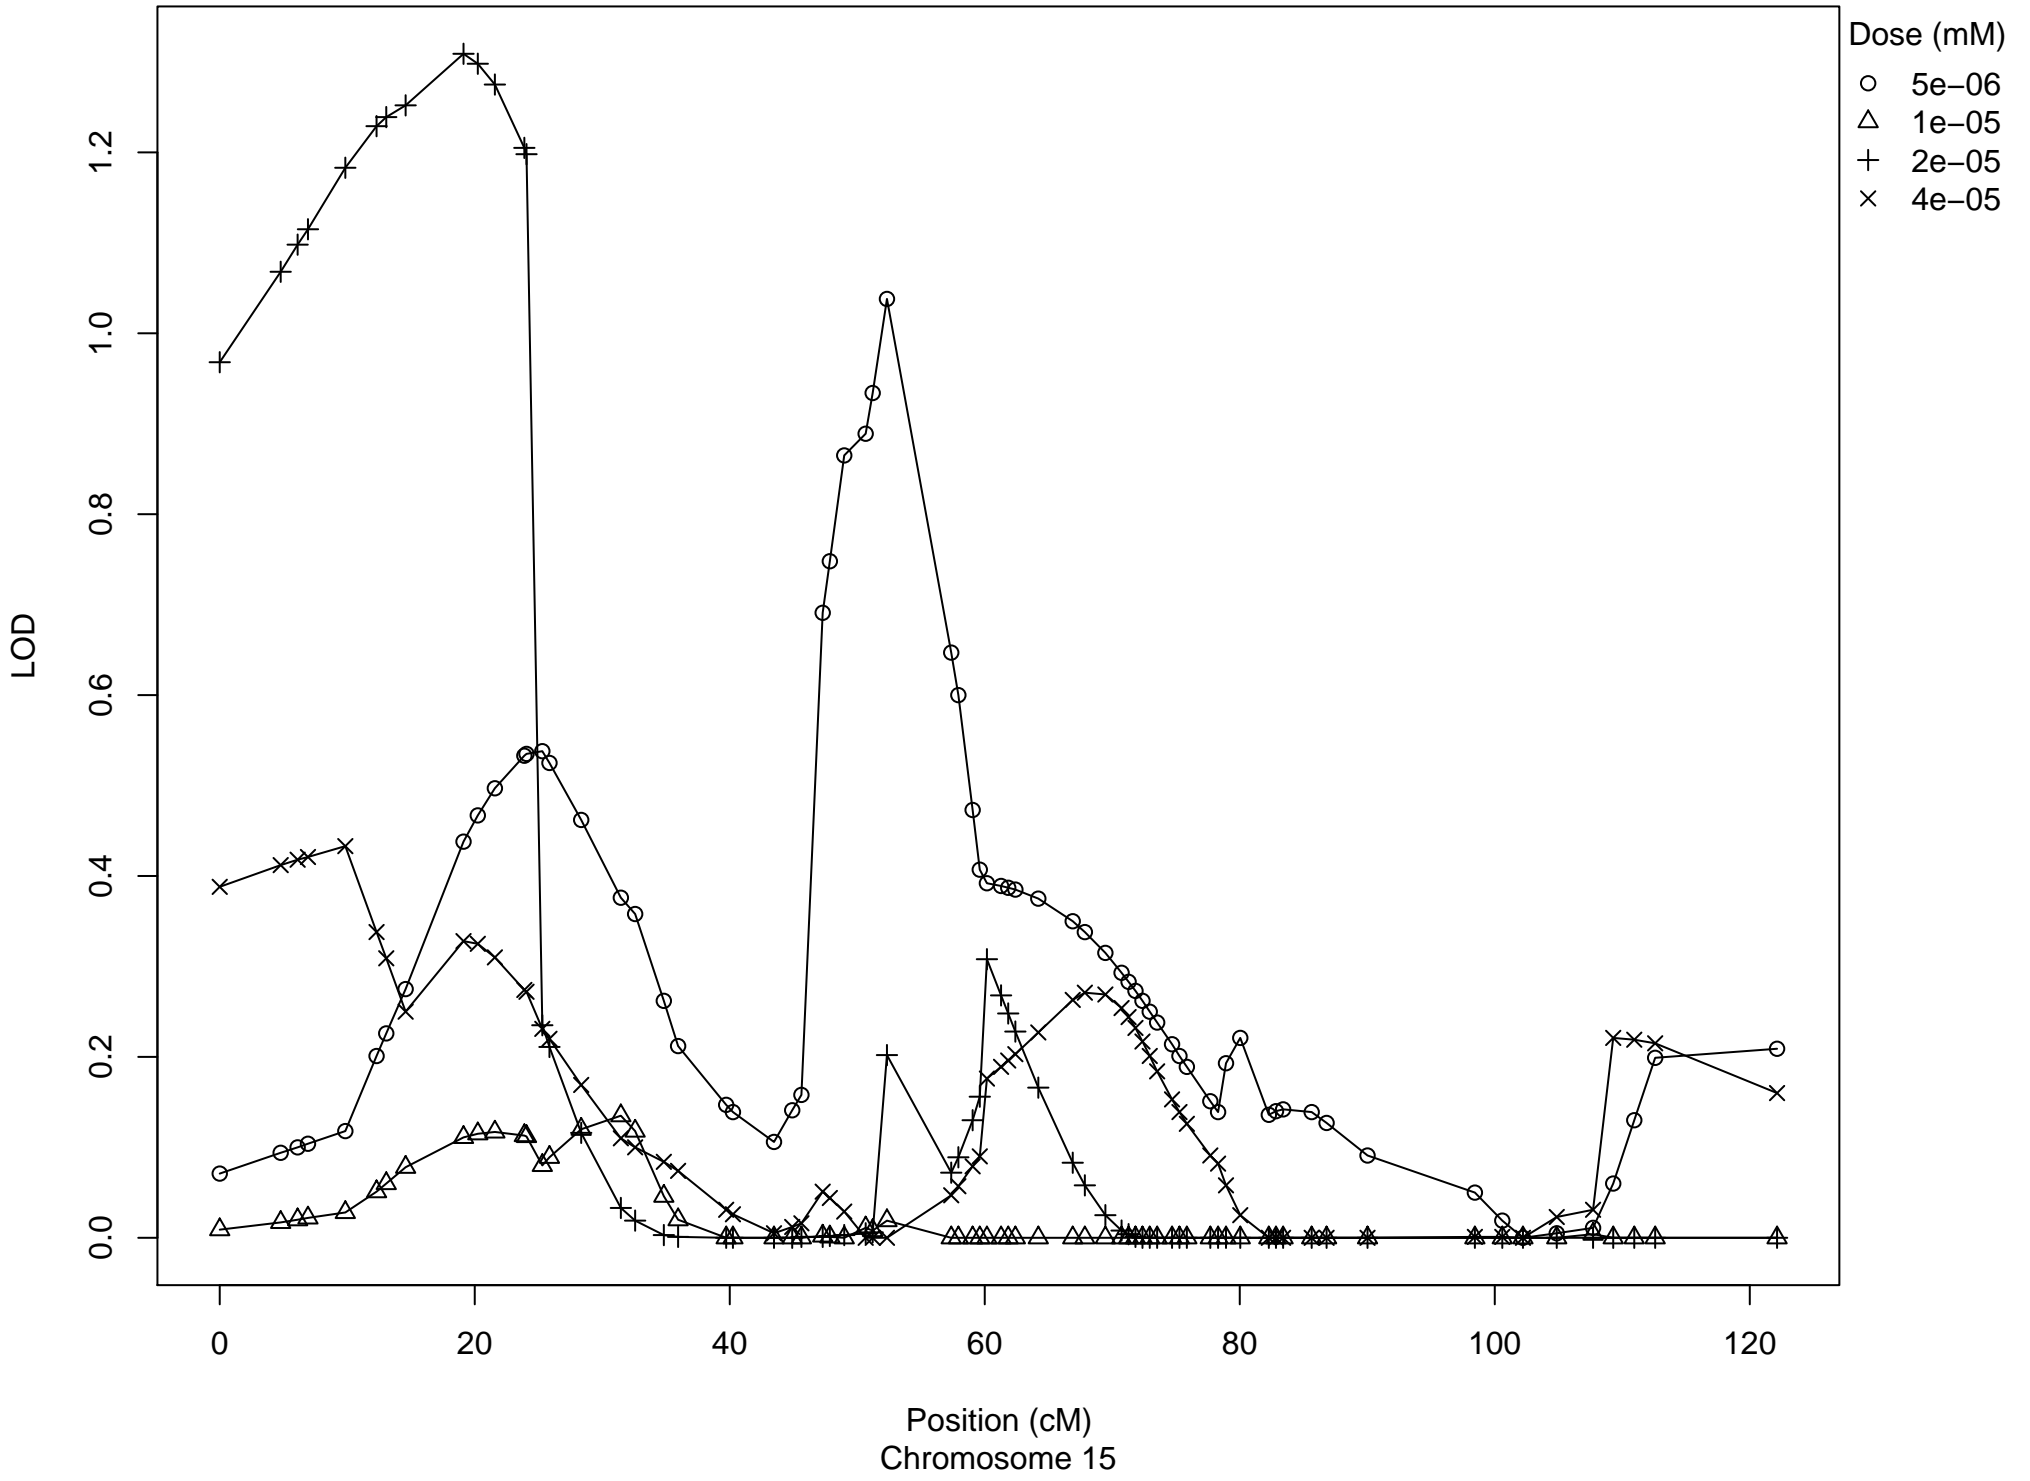

# Vinblastine Sulfate Salt (Vinb)

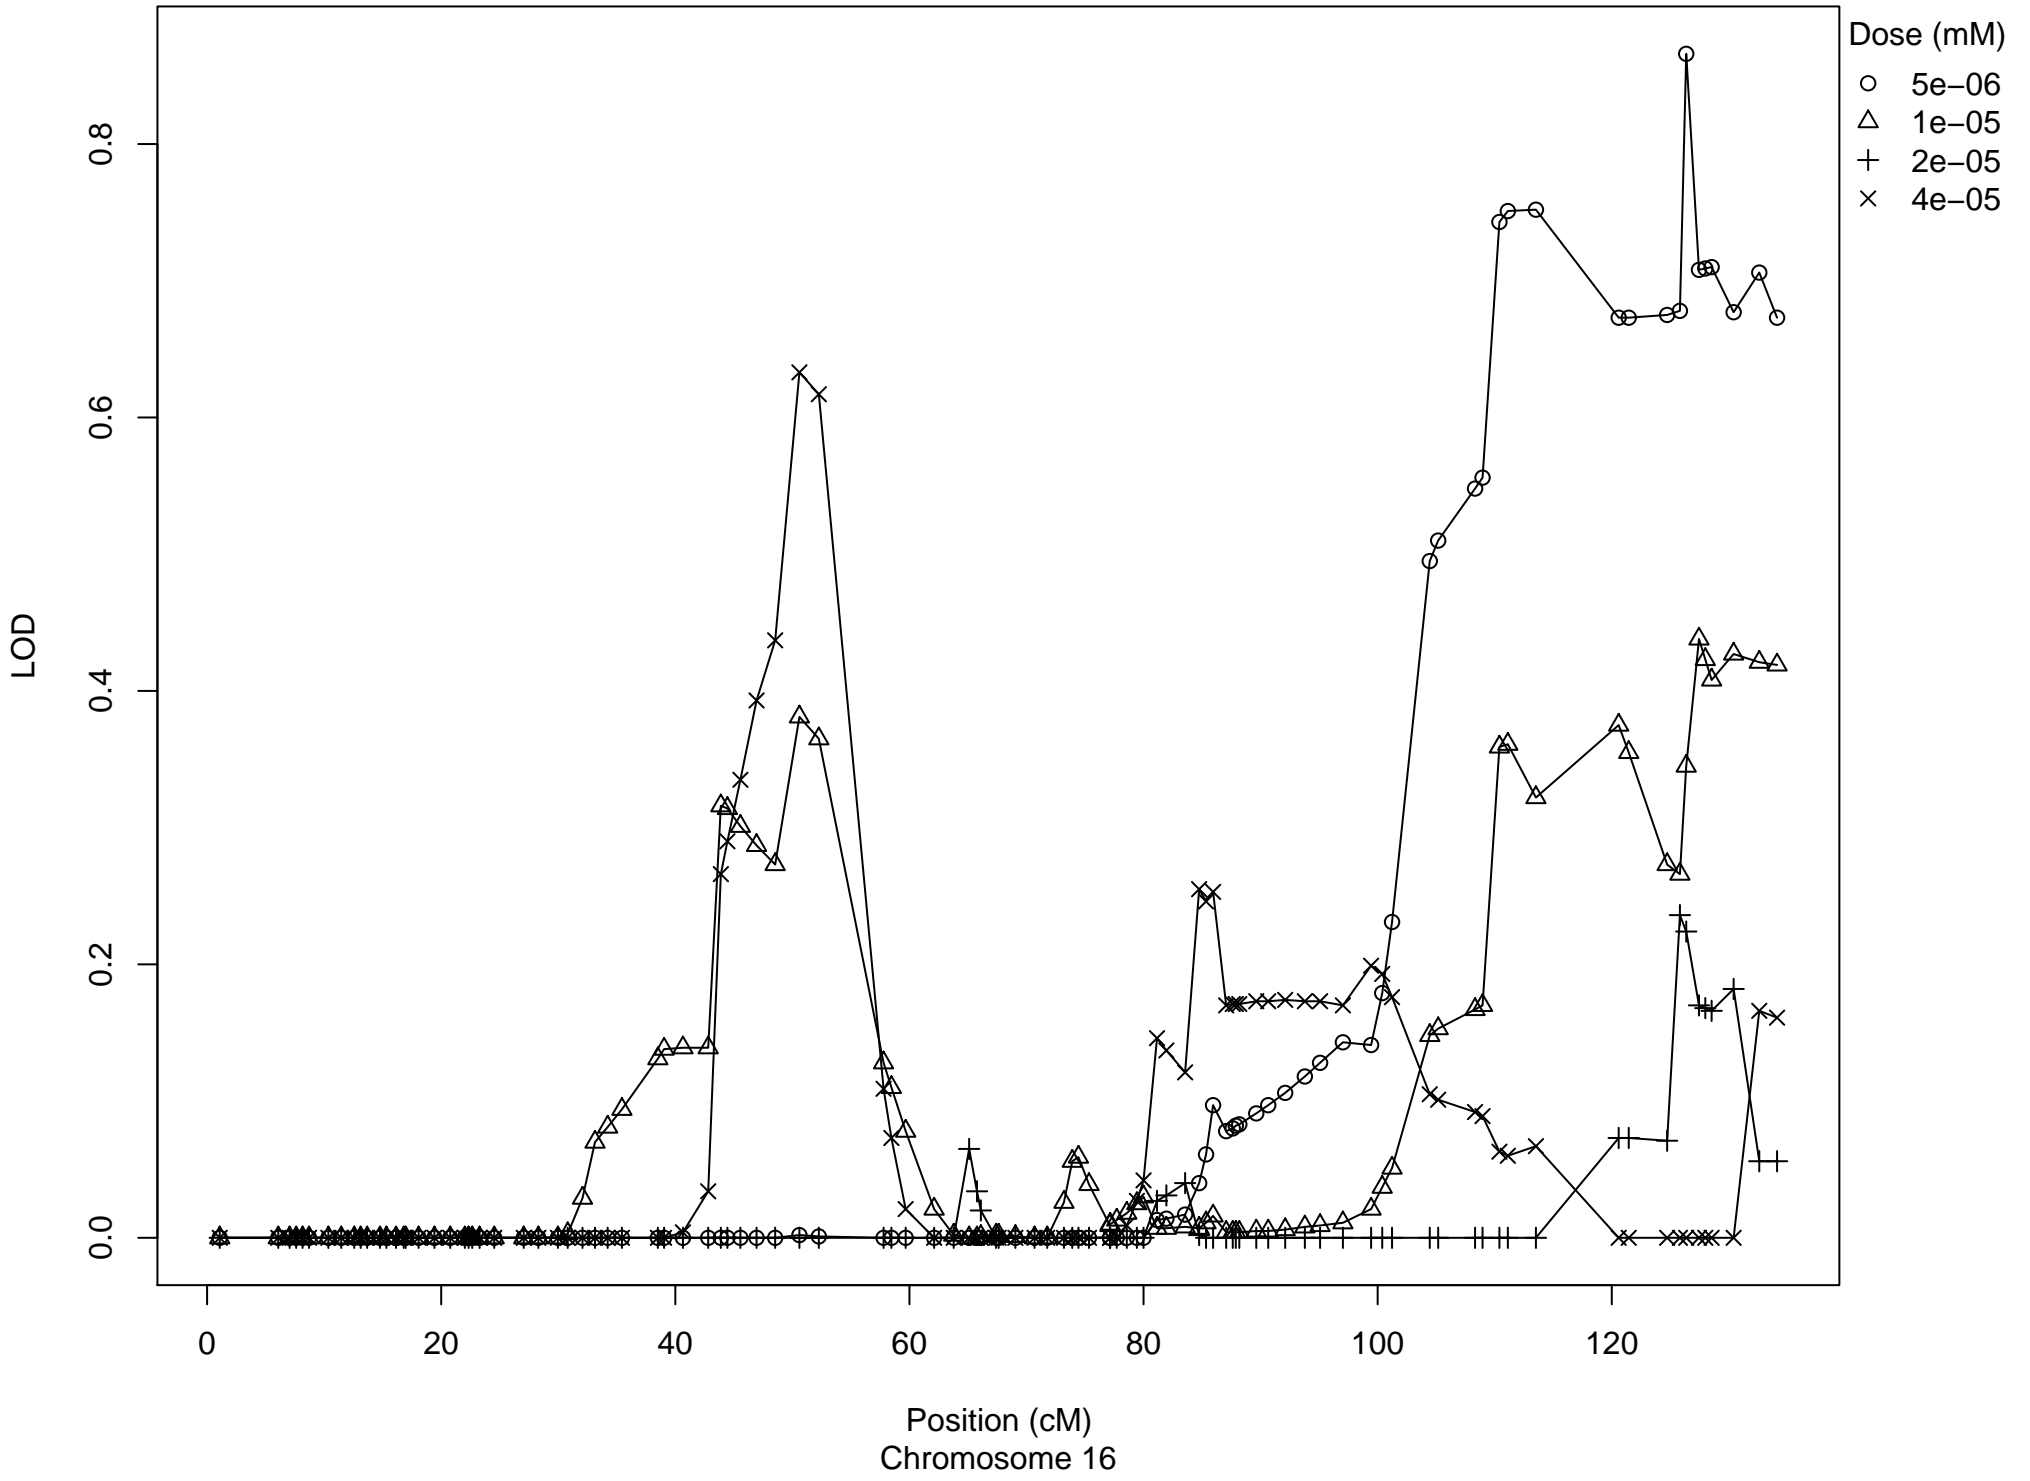

# Vinblastine Sulfate Salt (Vinb)

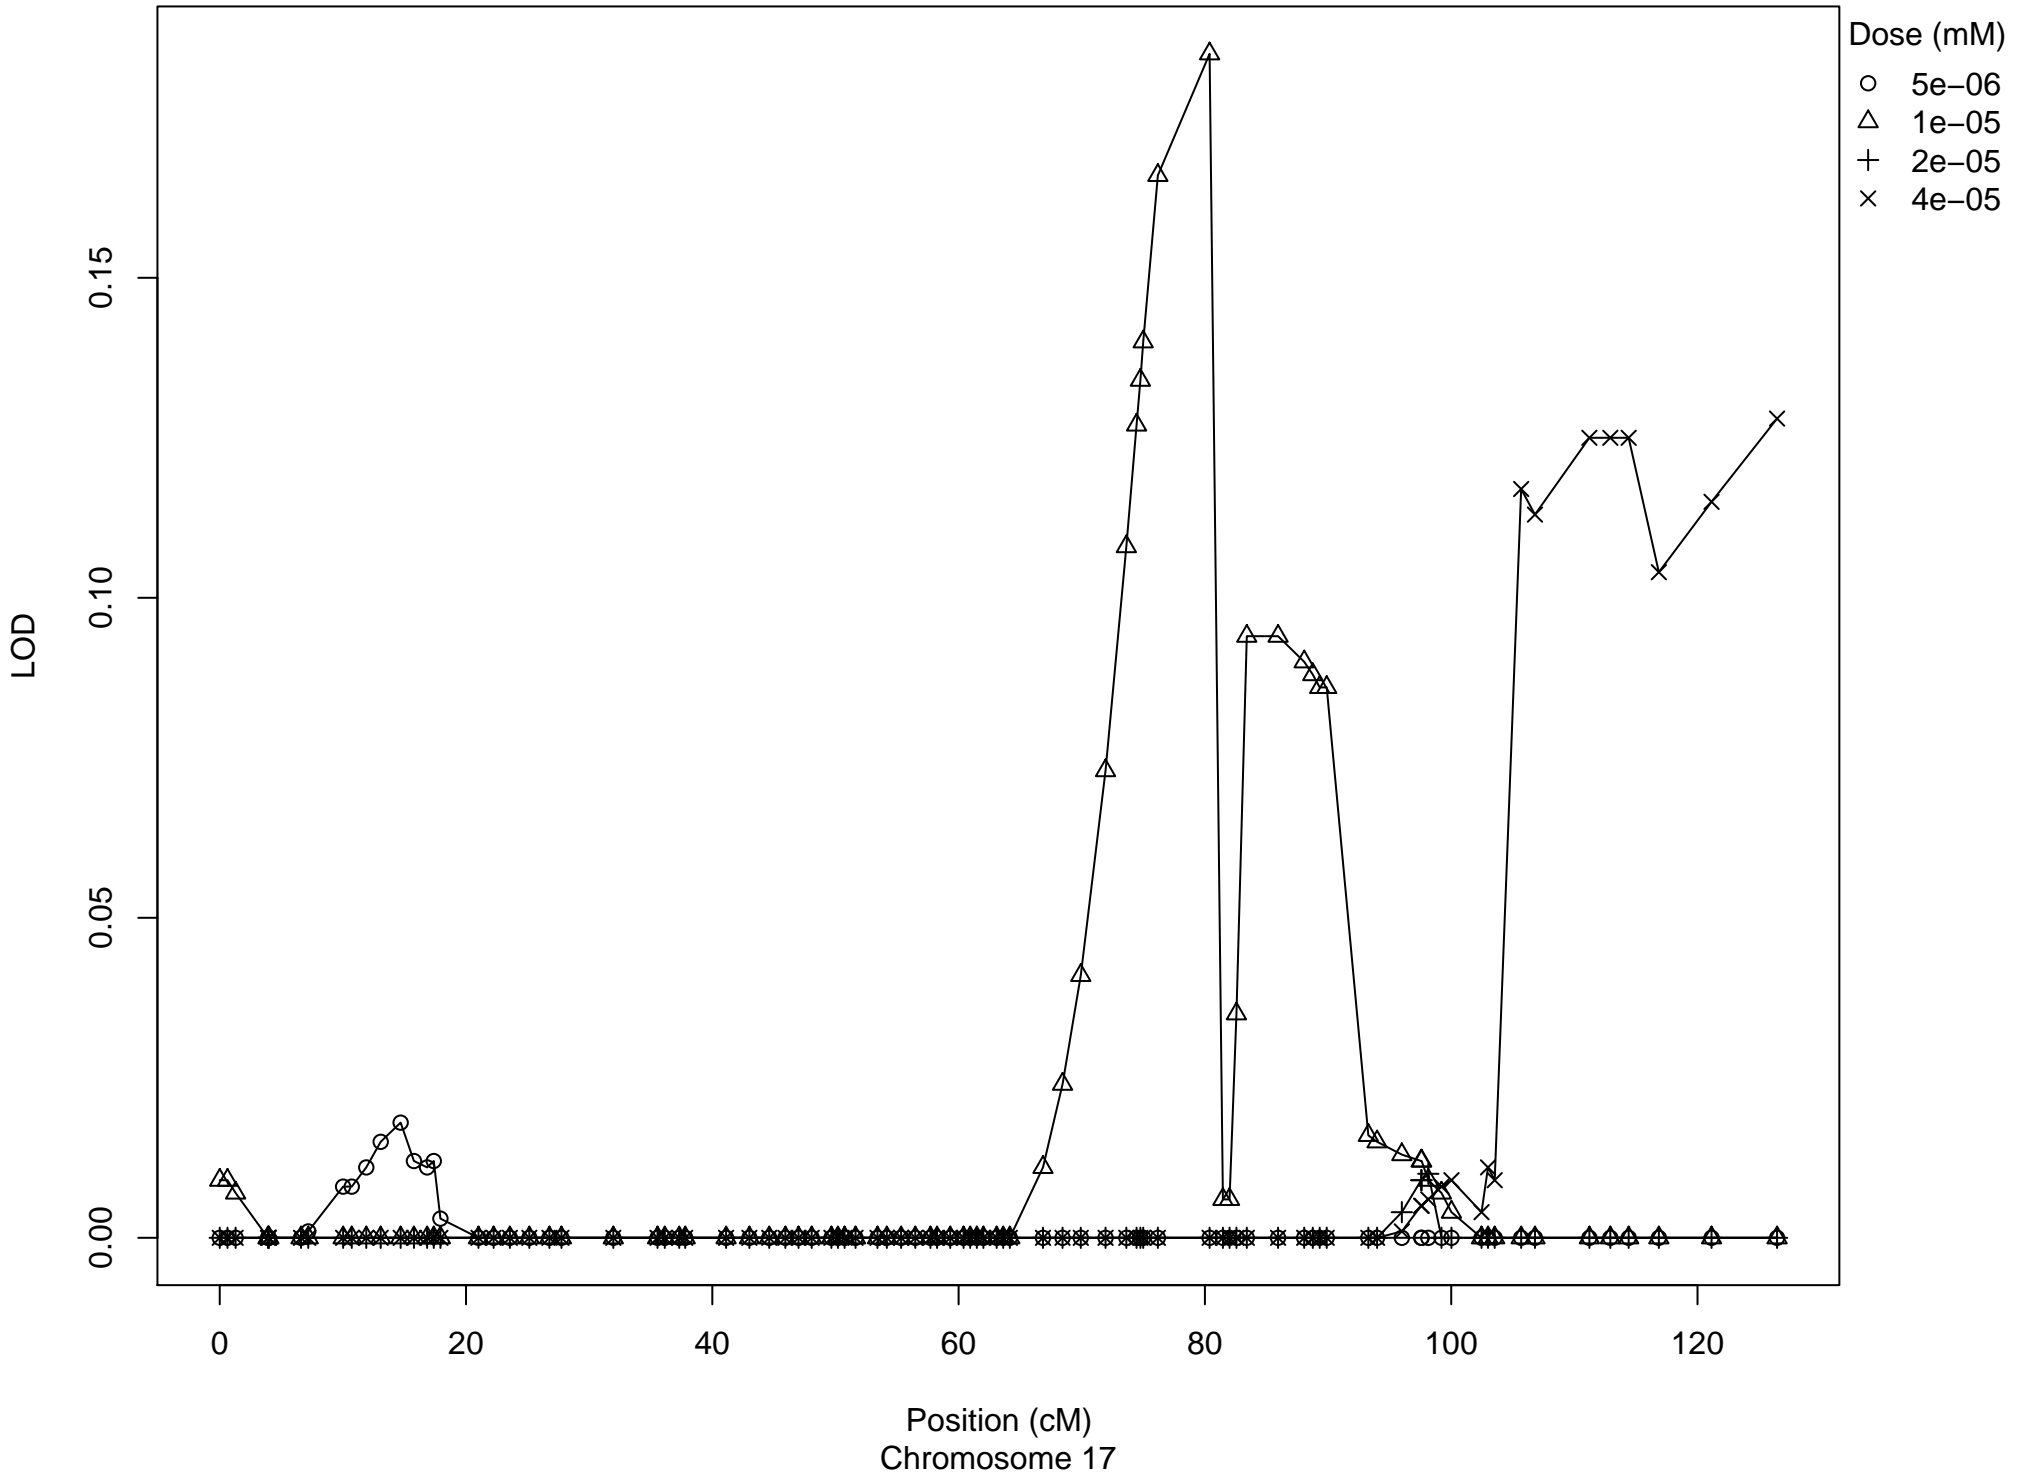

# Vinblastine Sulfate Salt (Vinb)

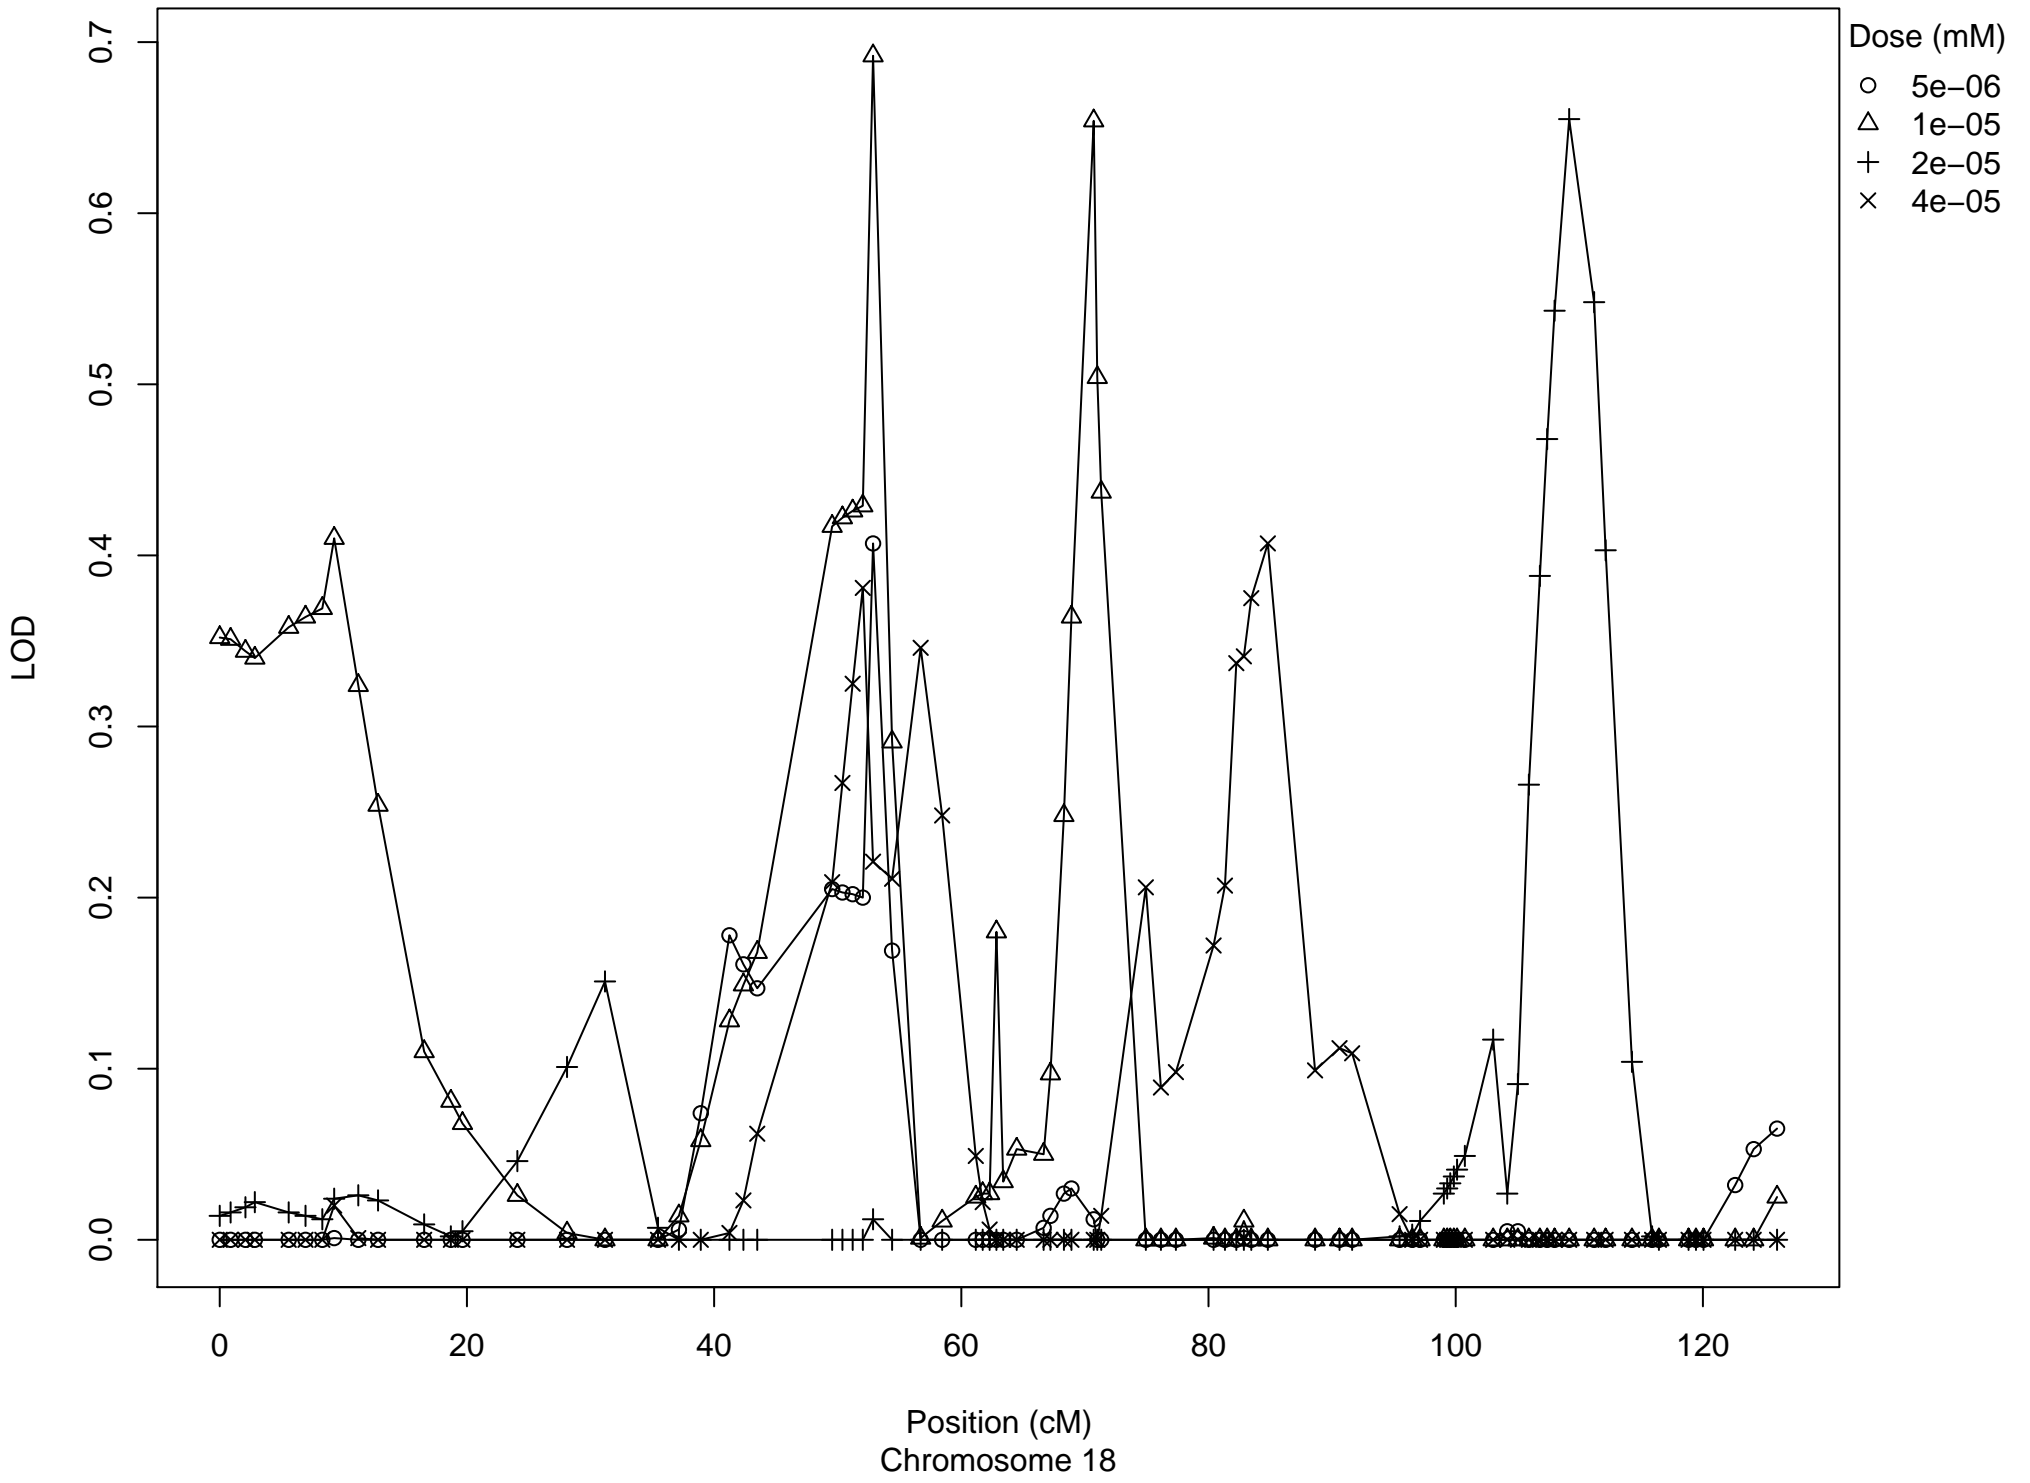

# Vinblastine Sulfate Salt (Vinb)

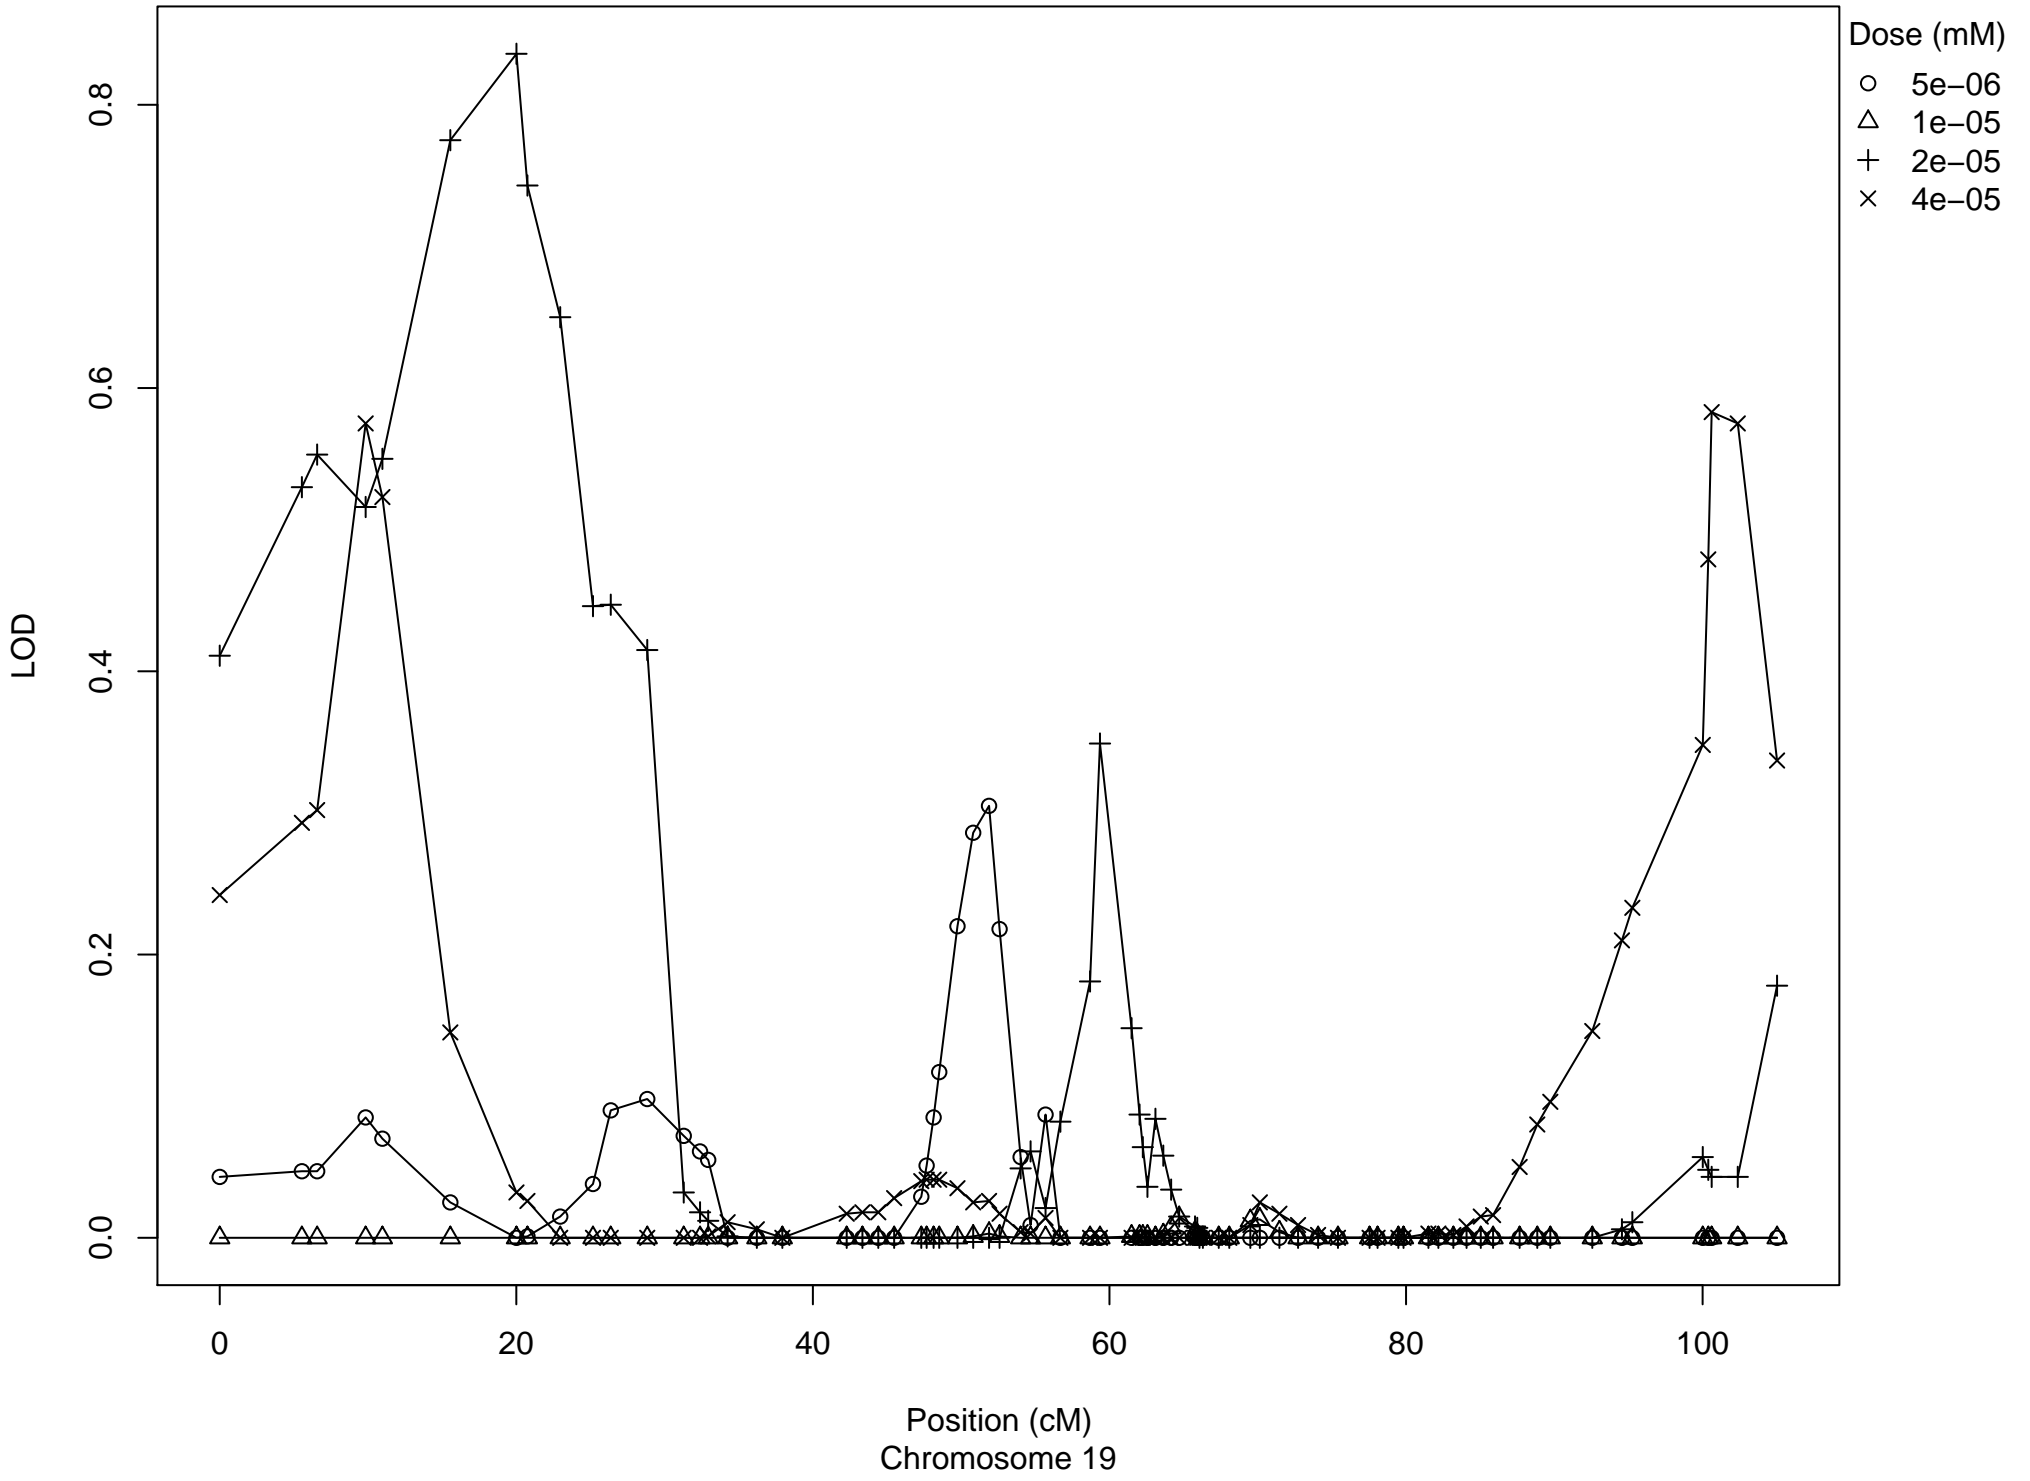

# Vinblastine Sulfate Salt (Vinb)

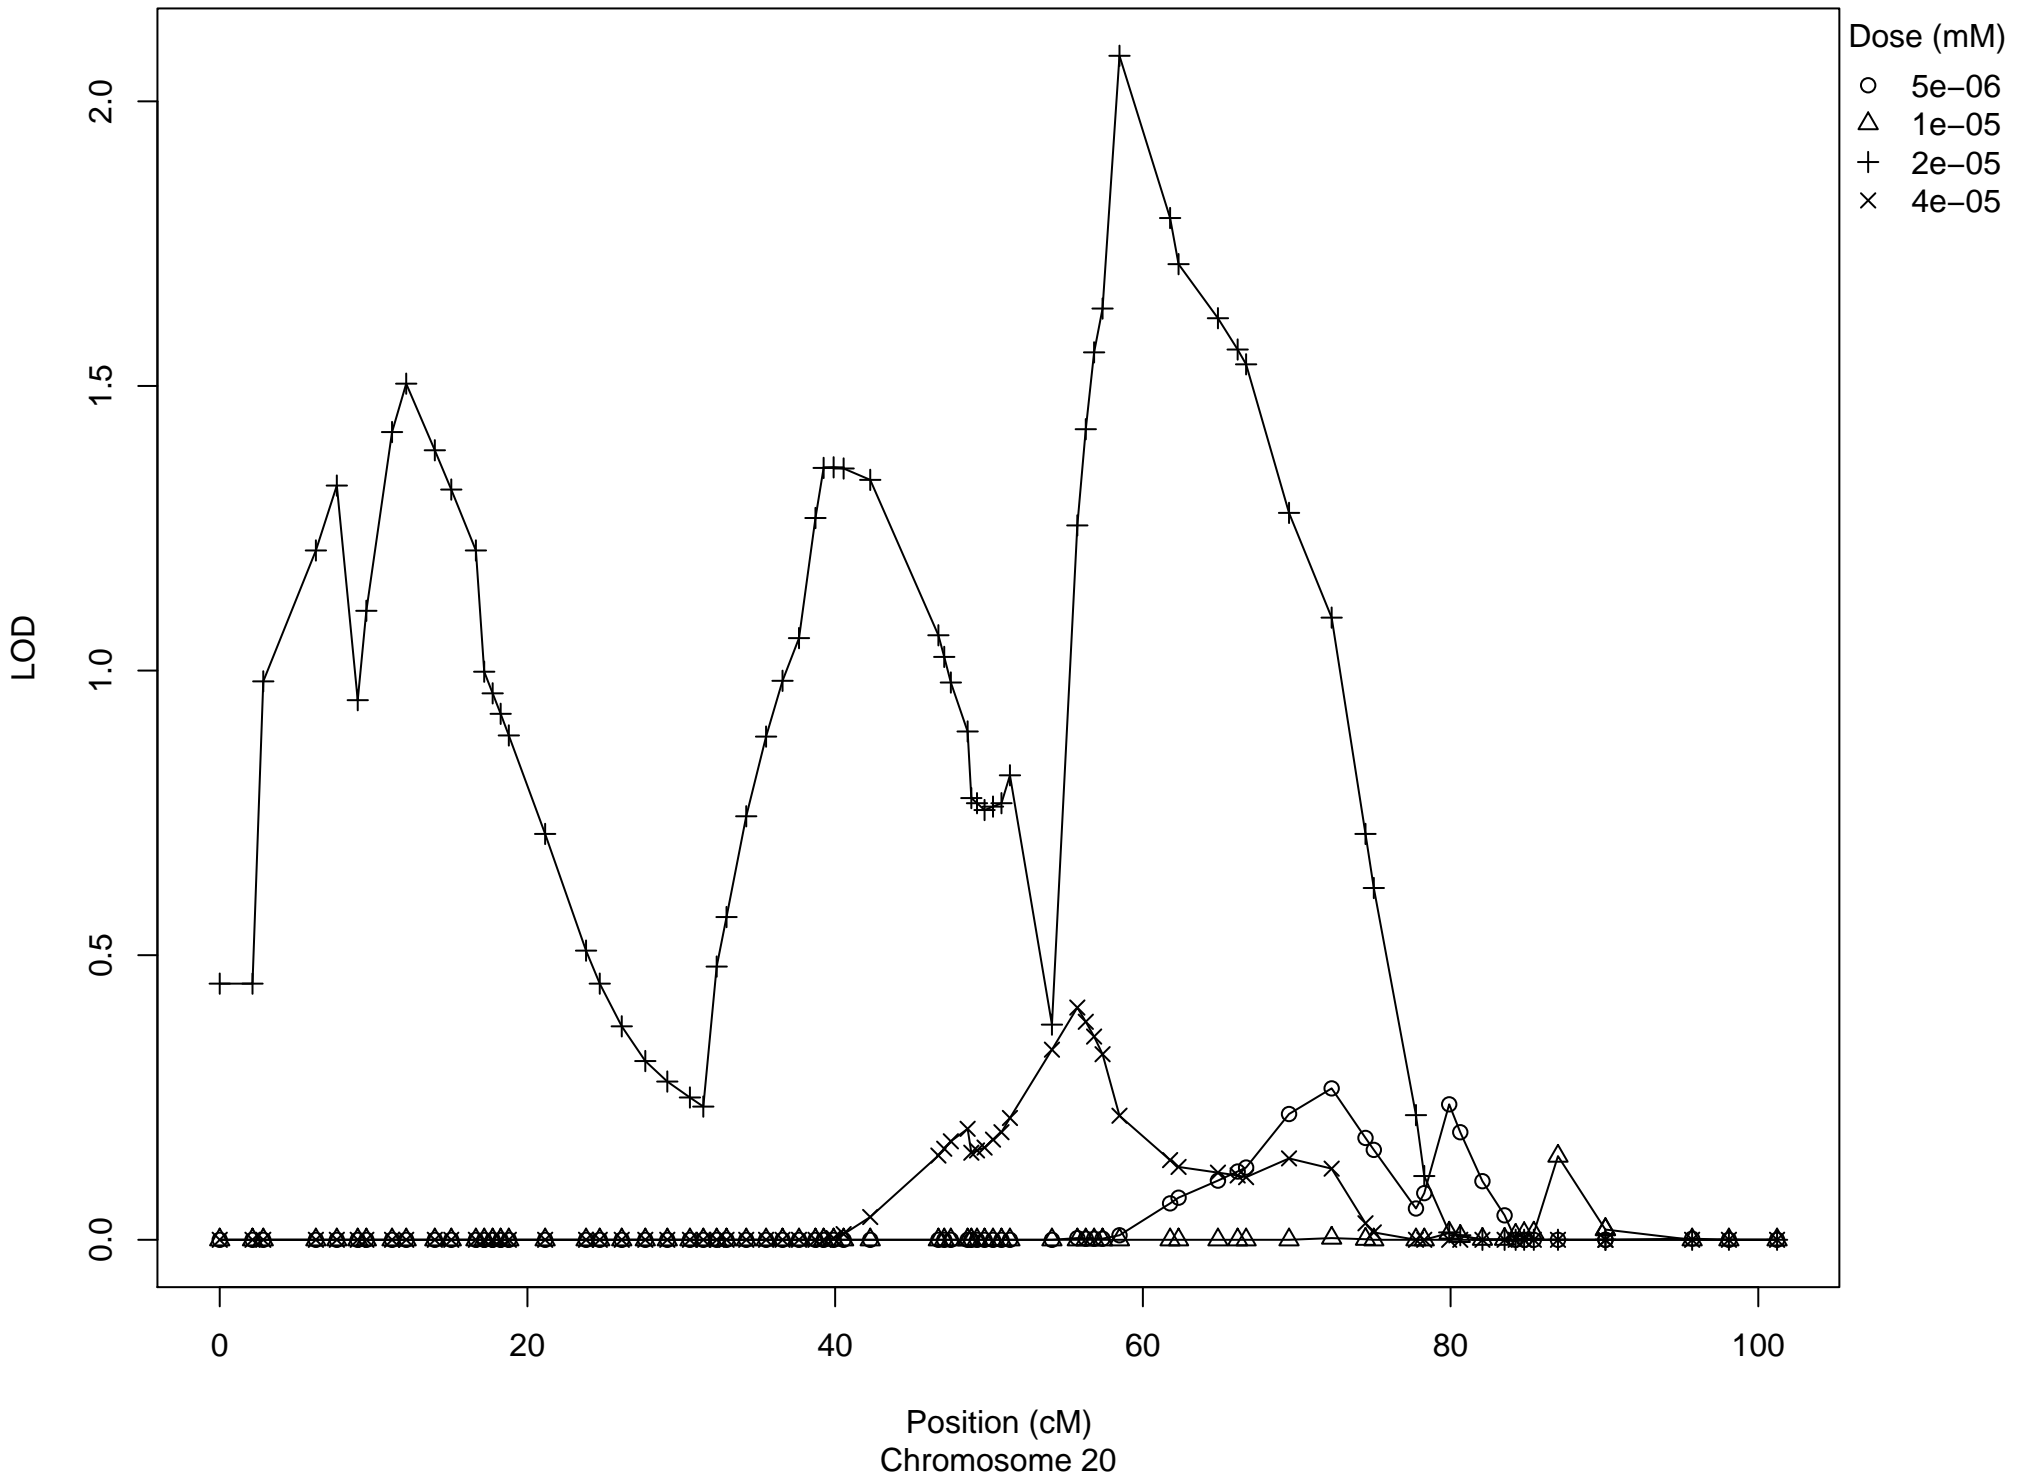



# Vinblastine Sulfate Salt (Vinb)

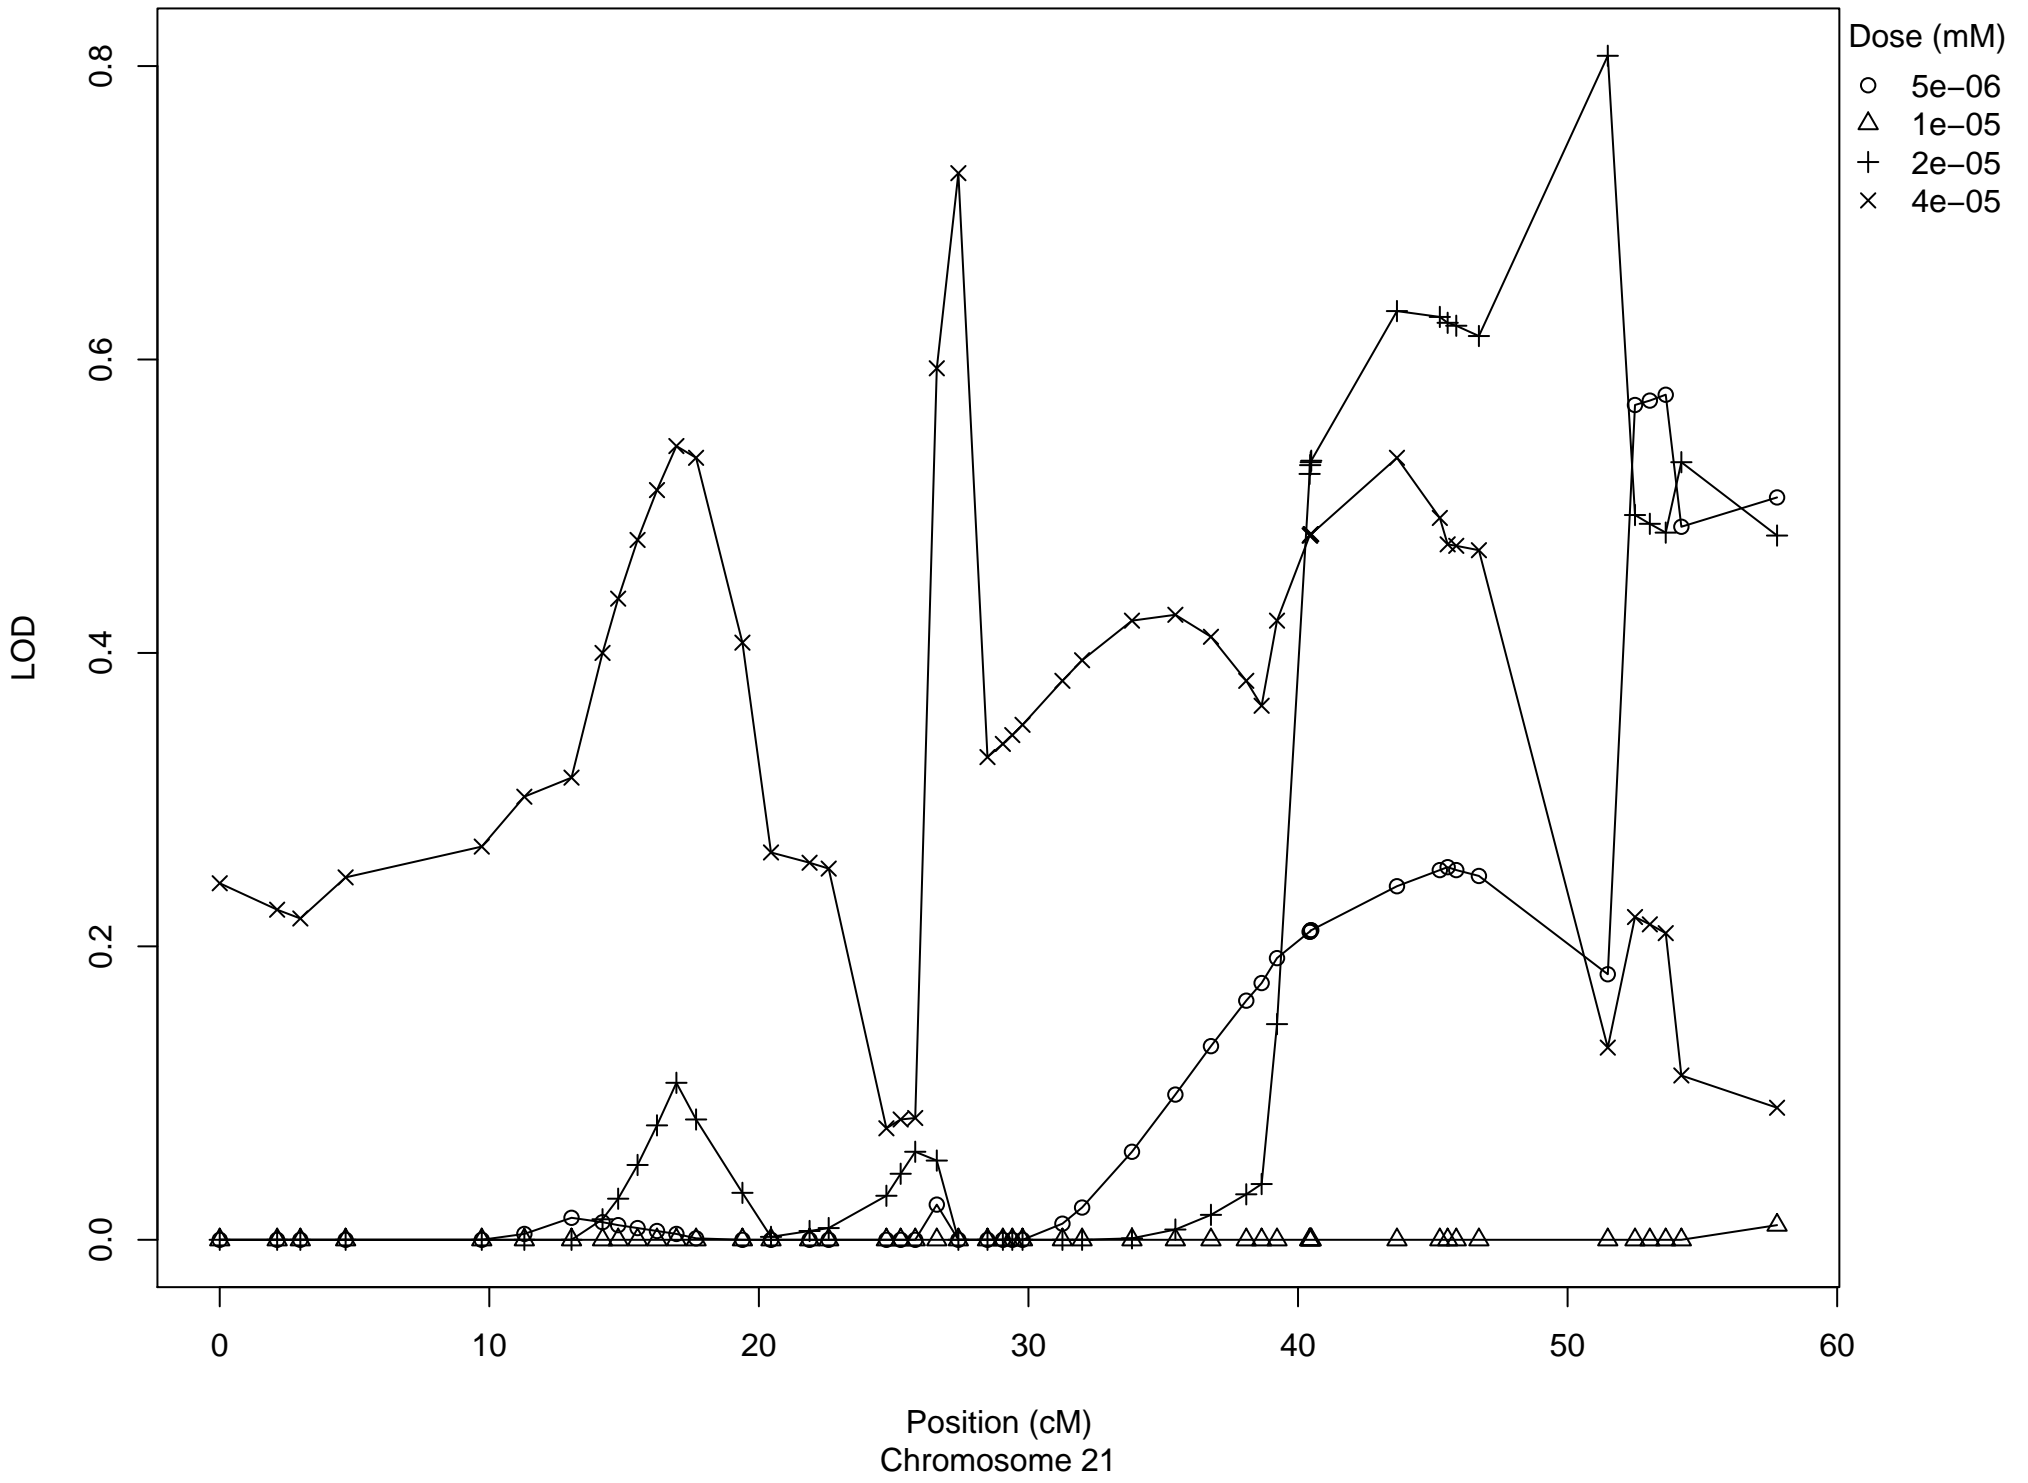

# Vinblastine Sulfate Salt (Vinb)

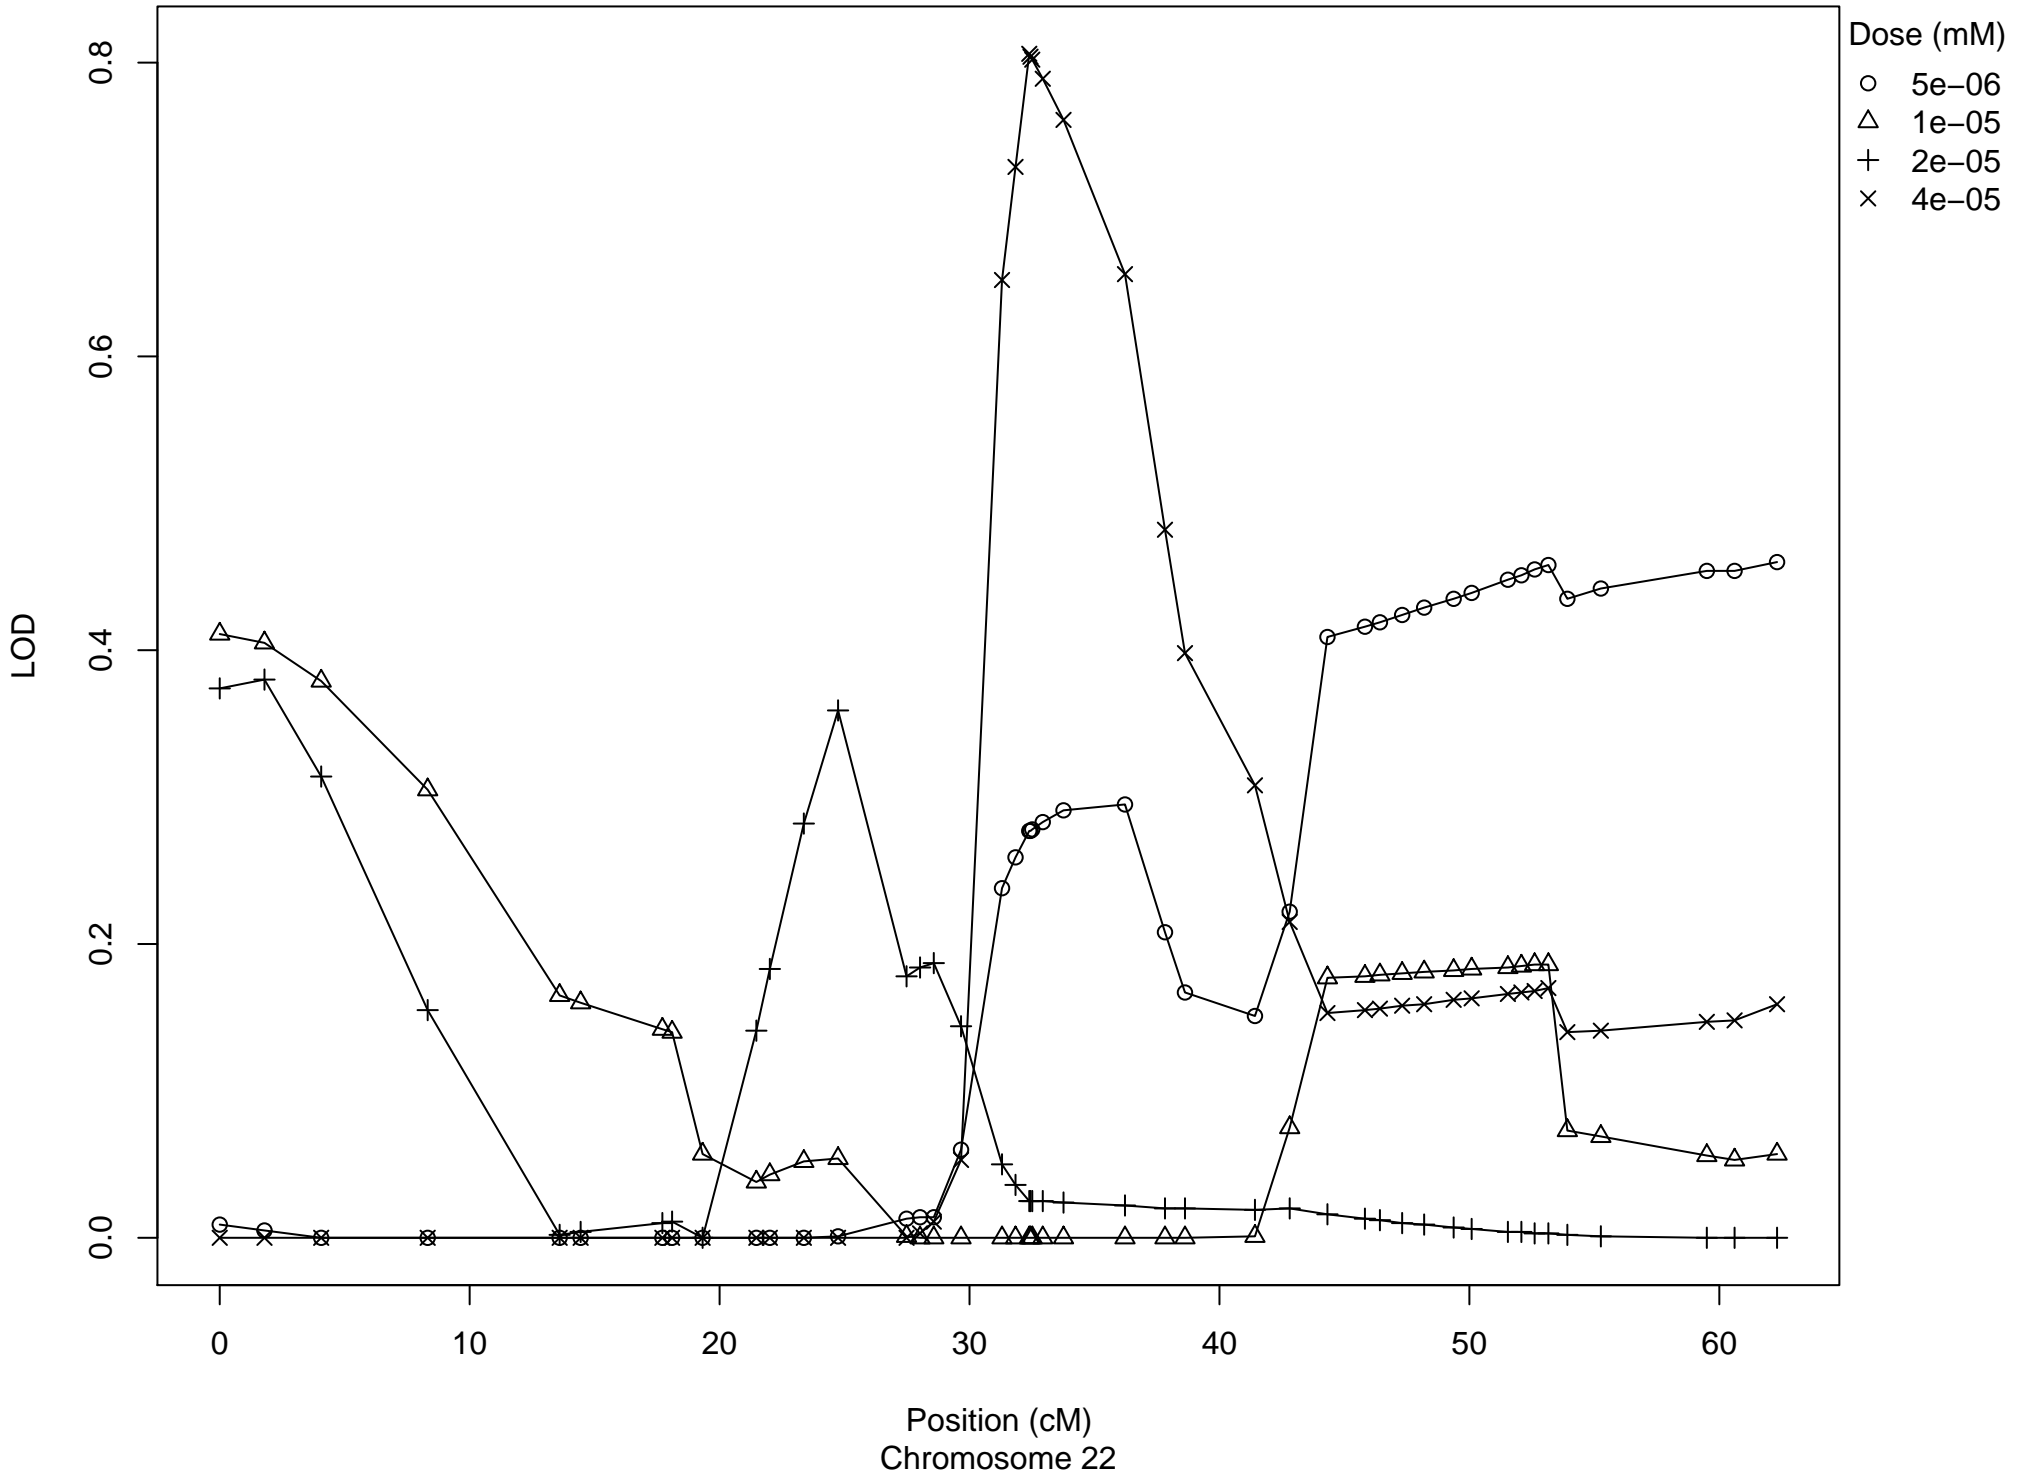

# Vincristine Sulfate Salt (Vinc)

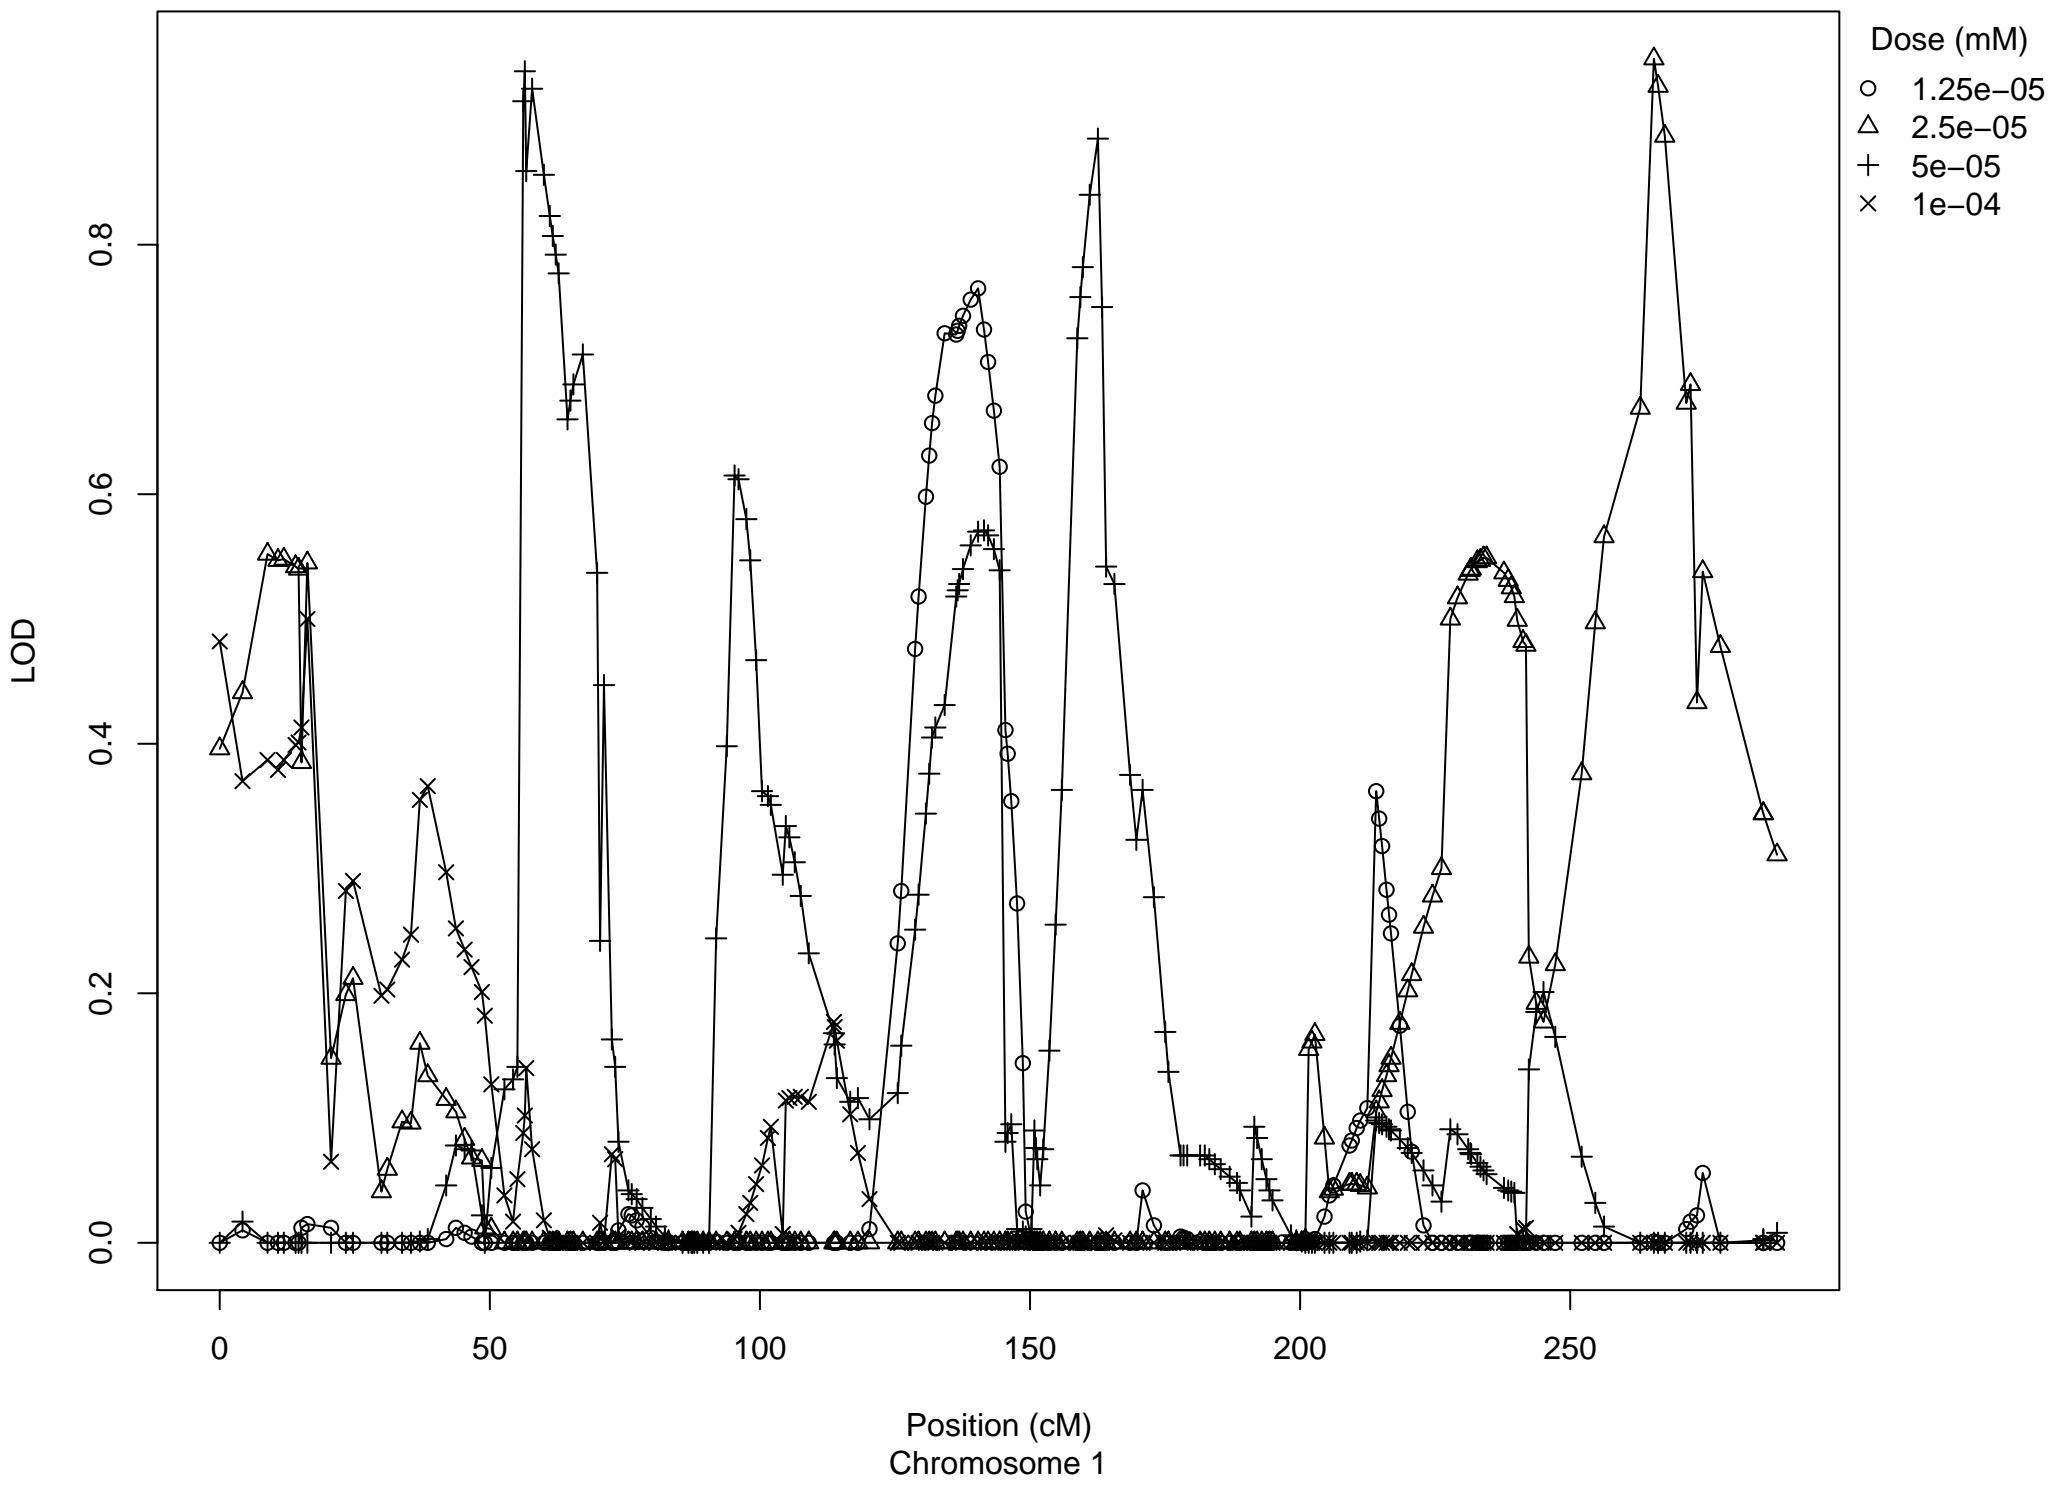

# Vincristine Sulfate Salt (Vinc)

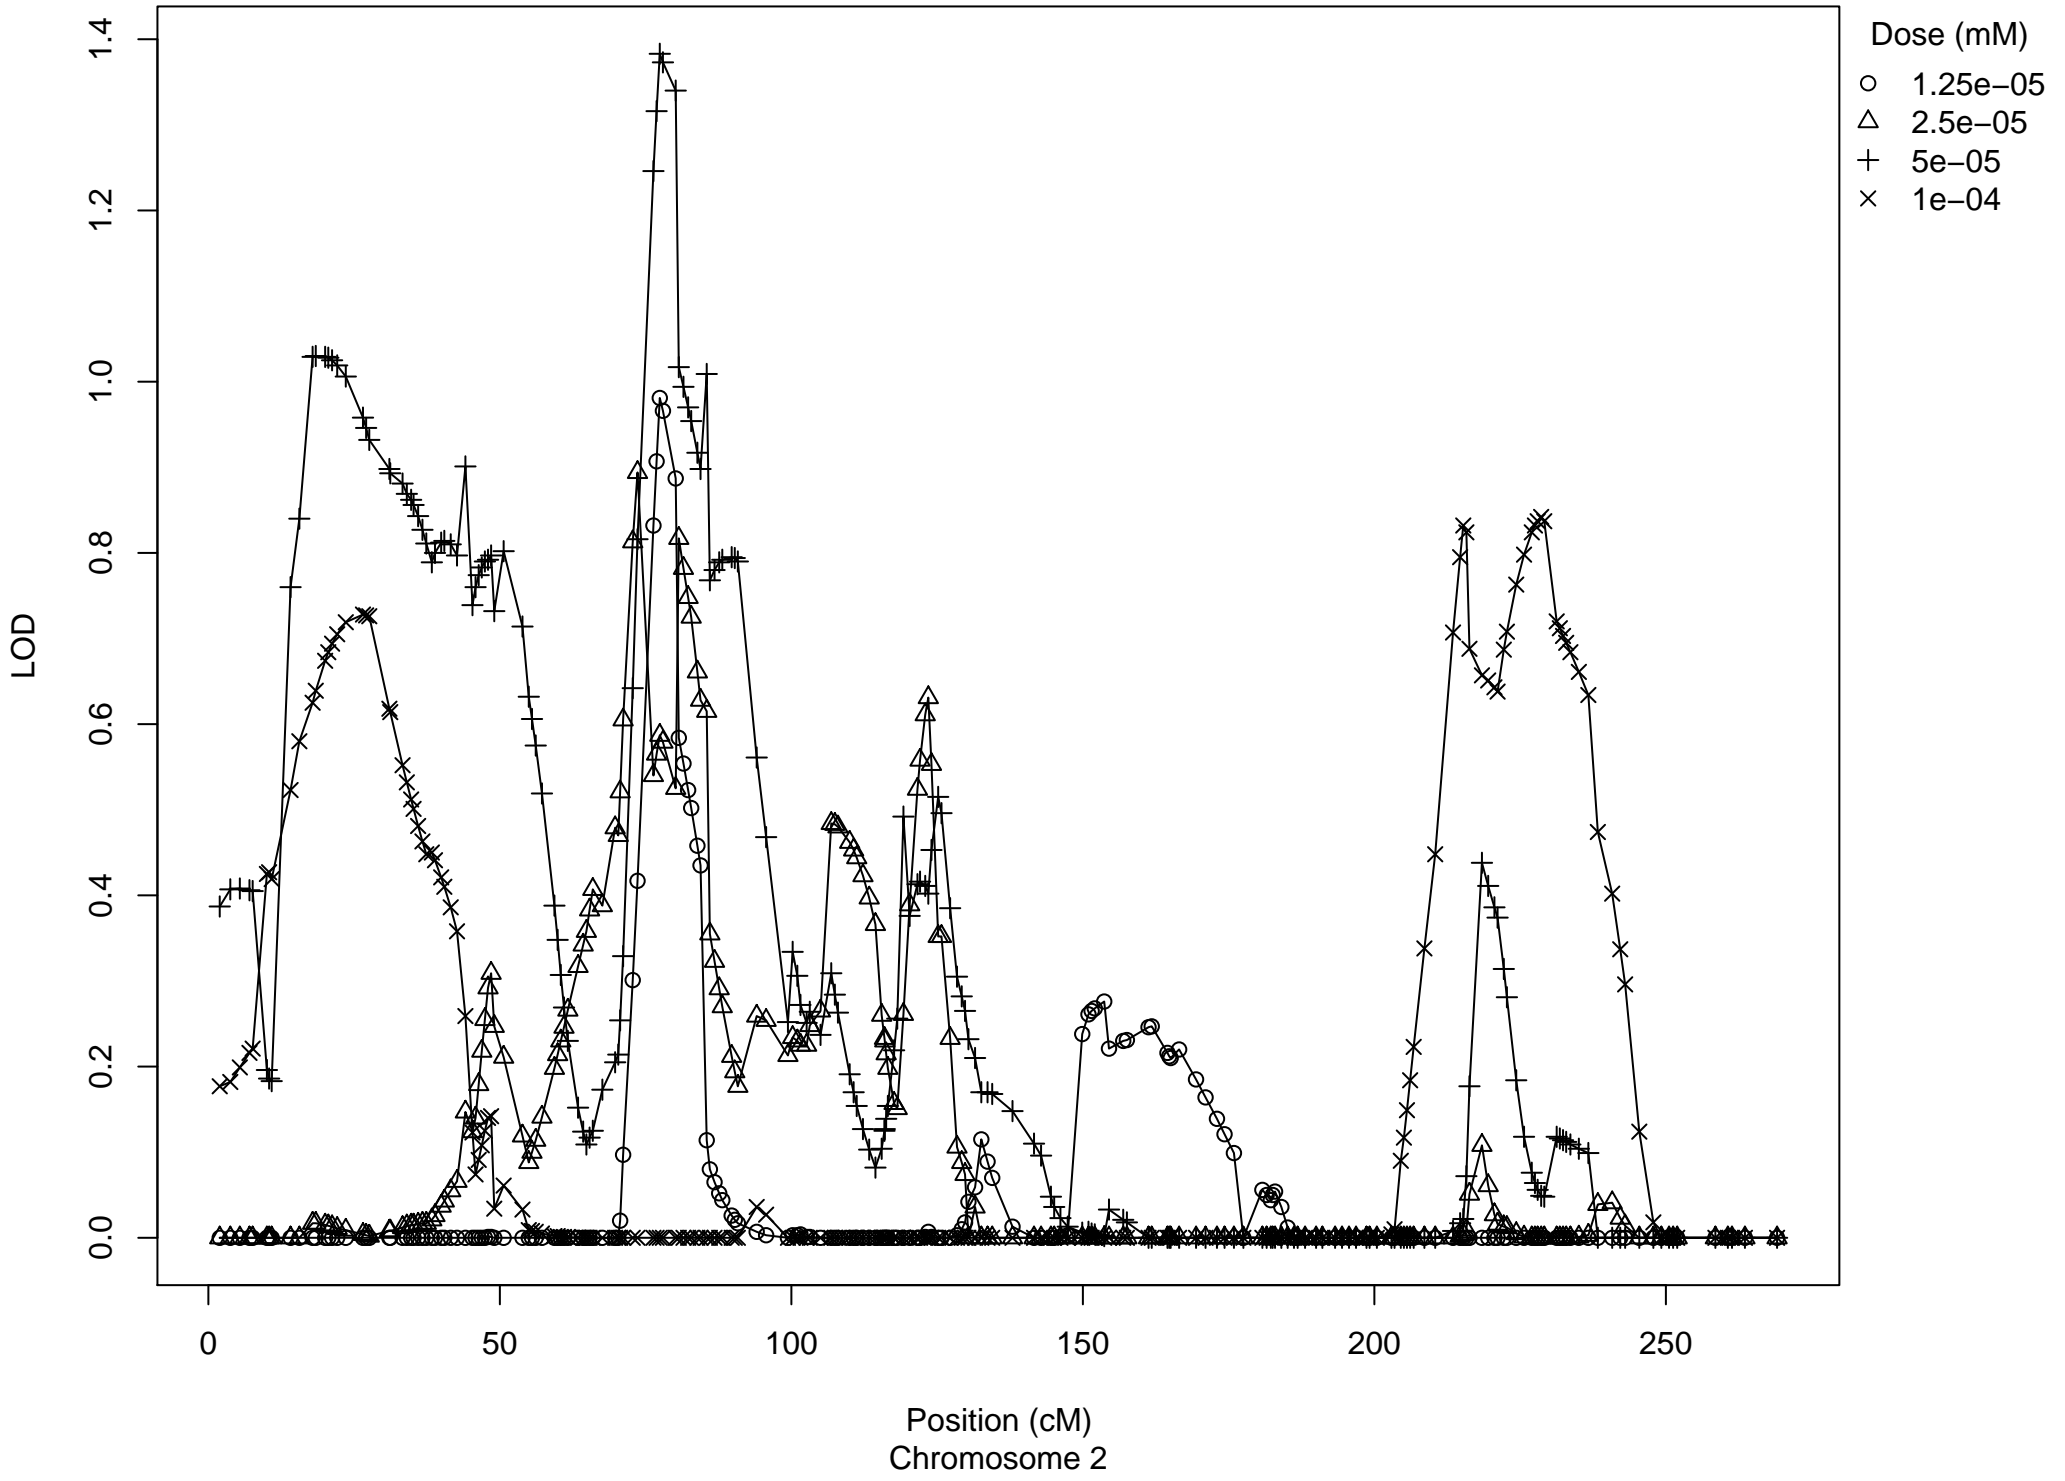

# Vincristine Sulfate Salt (Vinc)

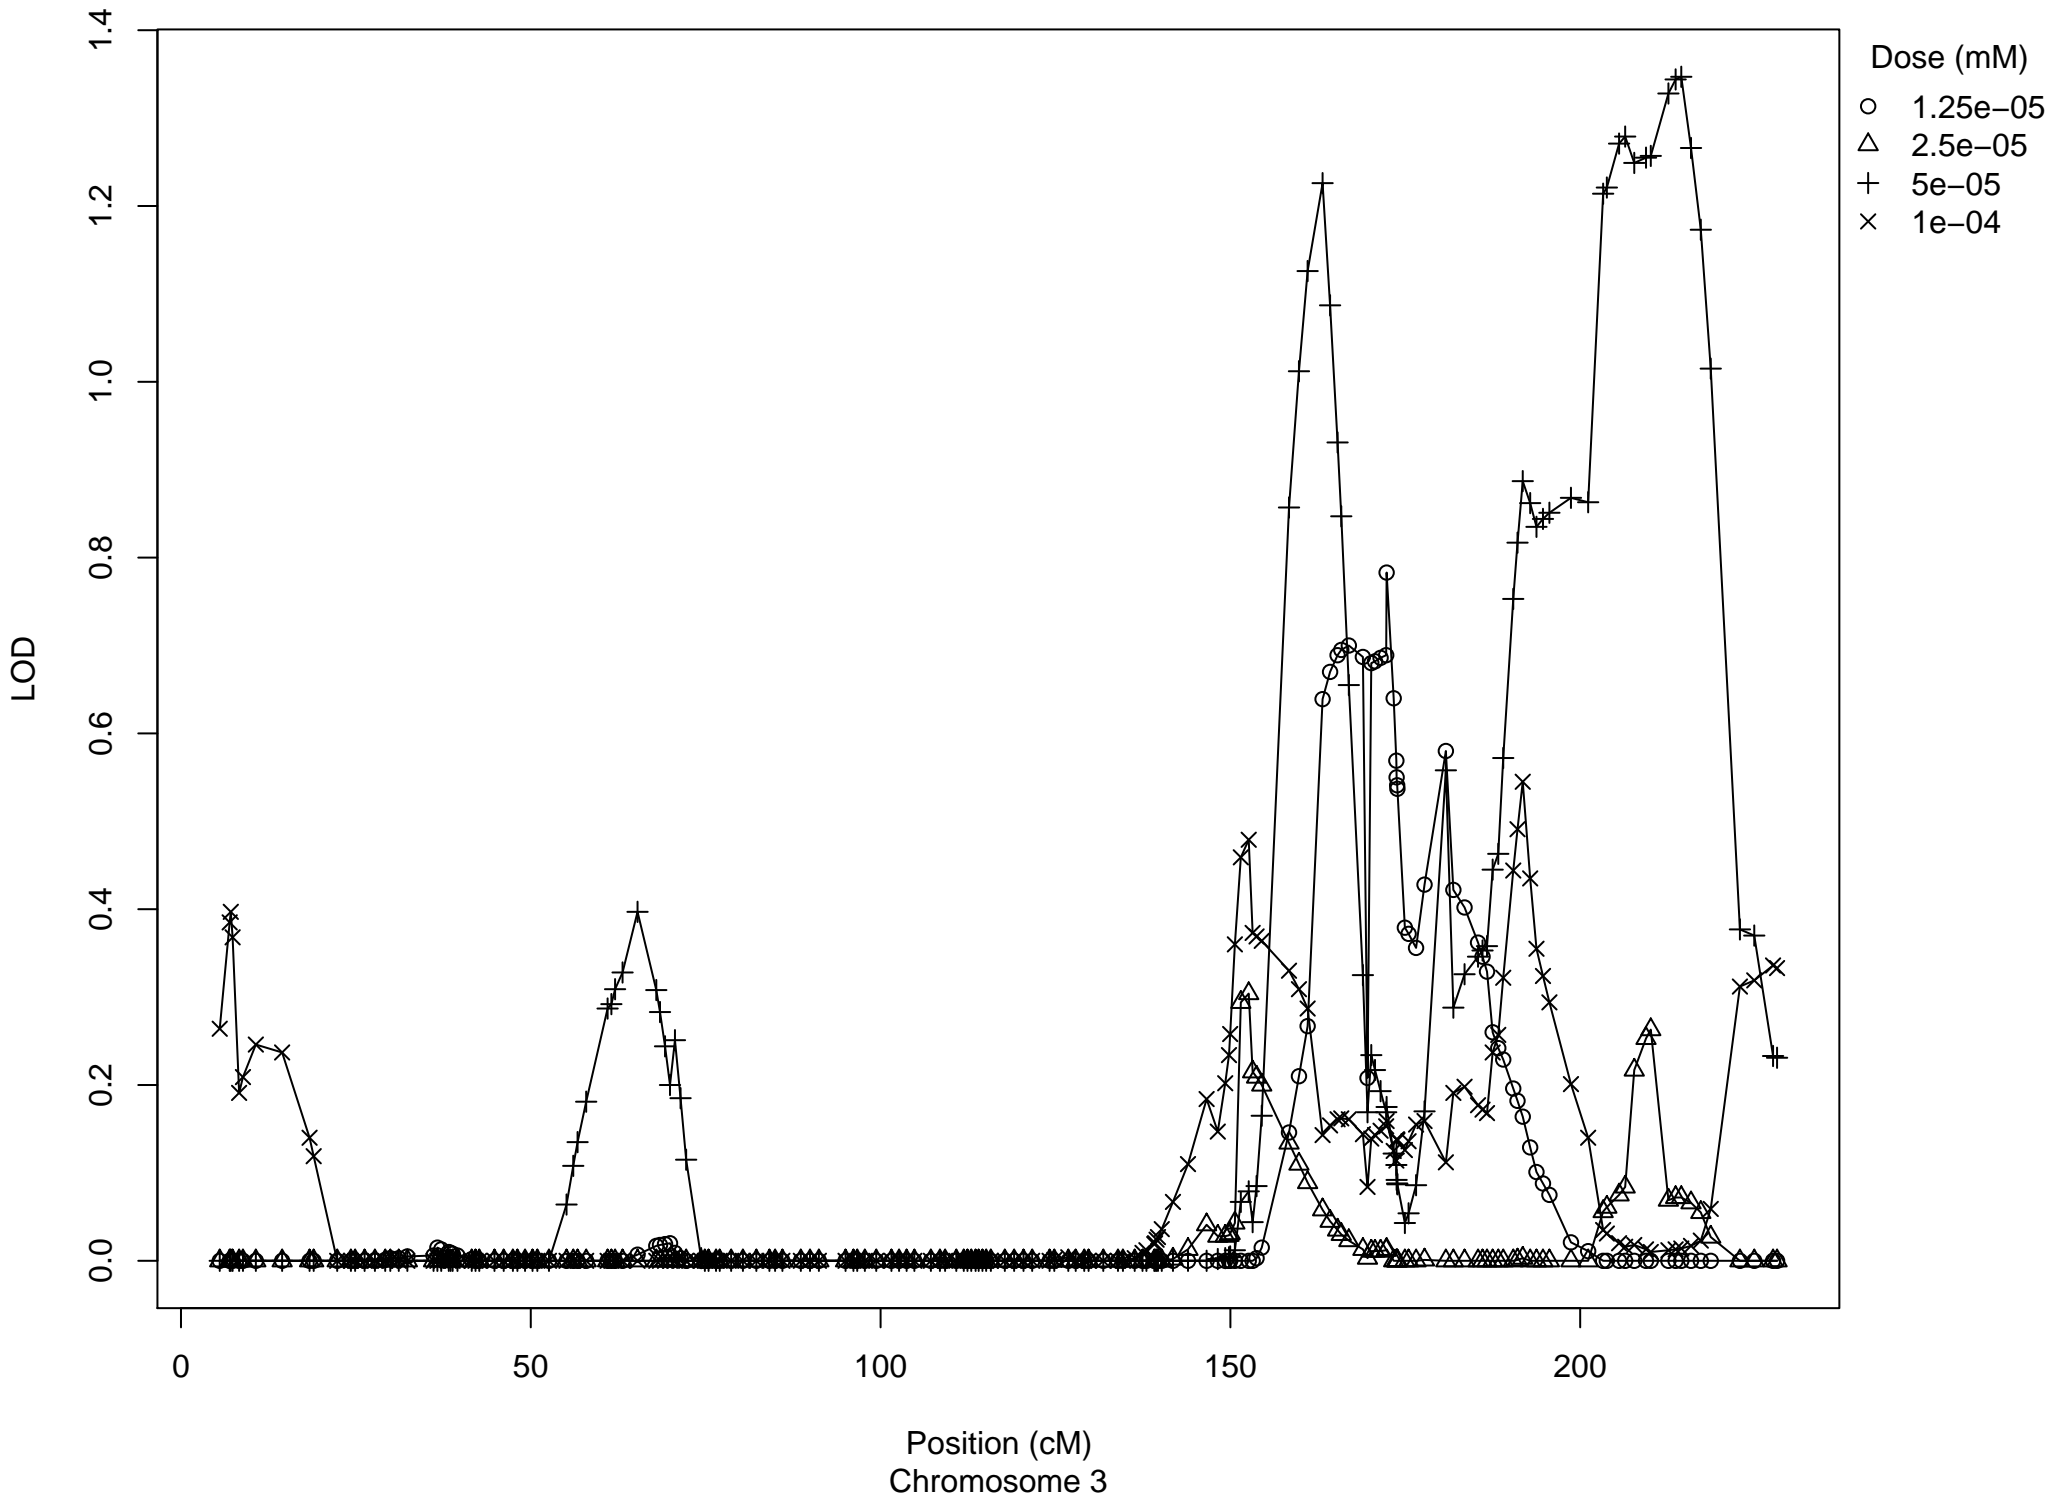

# Vincristine Sulfate Salt (Vinc)

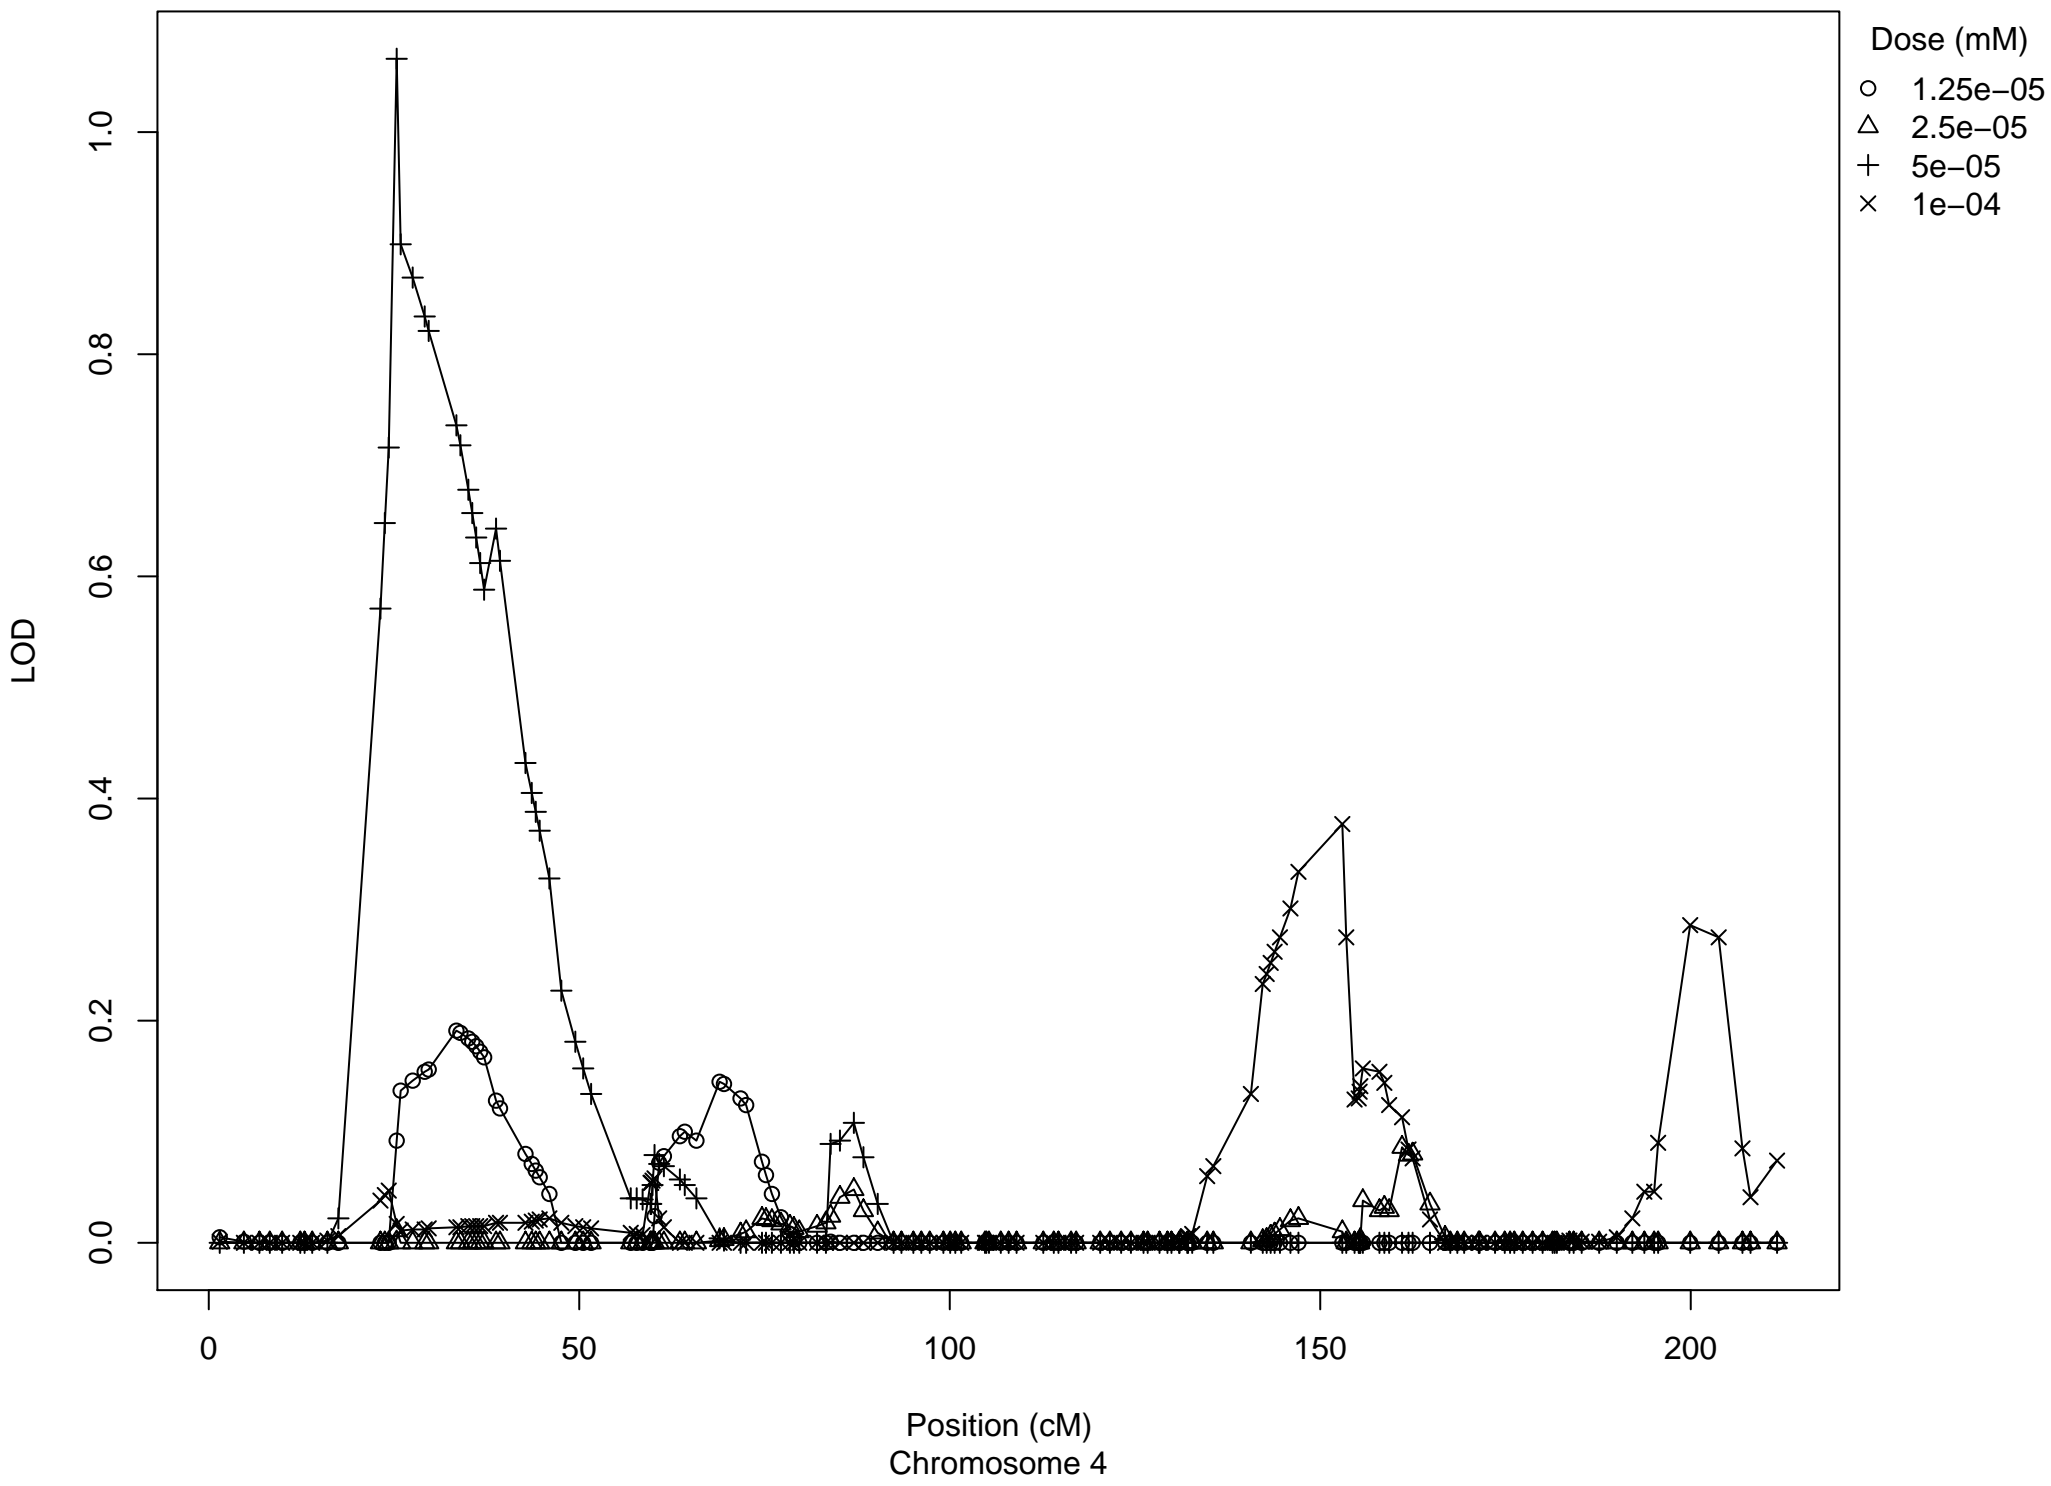

# Vincristine Sulfate Salt (Vinc)

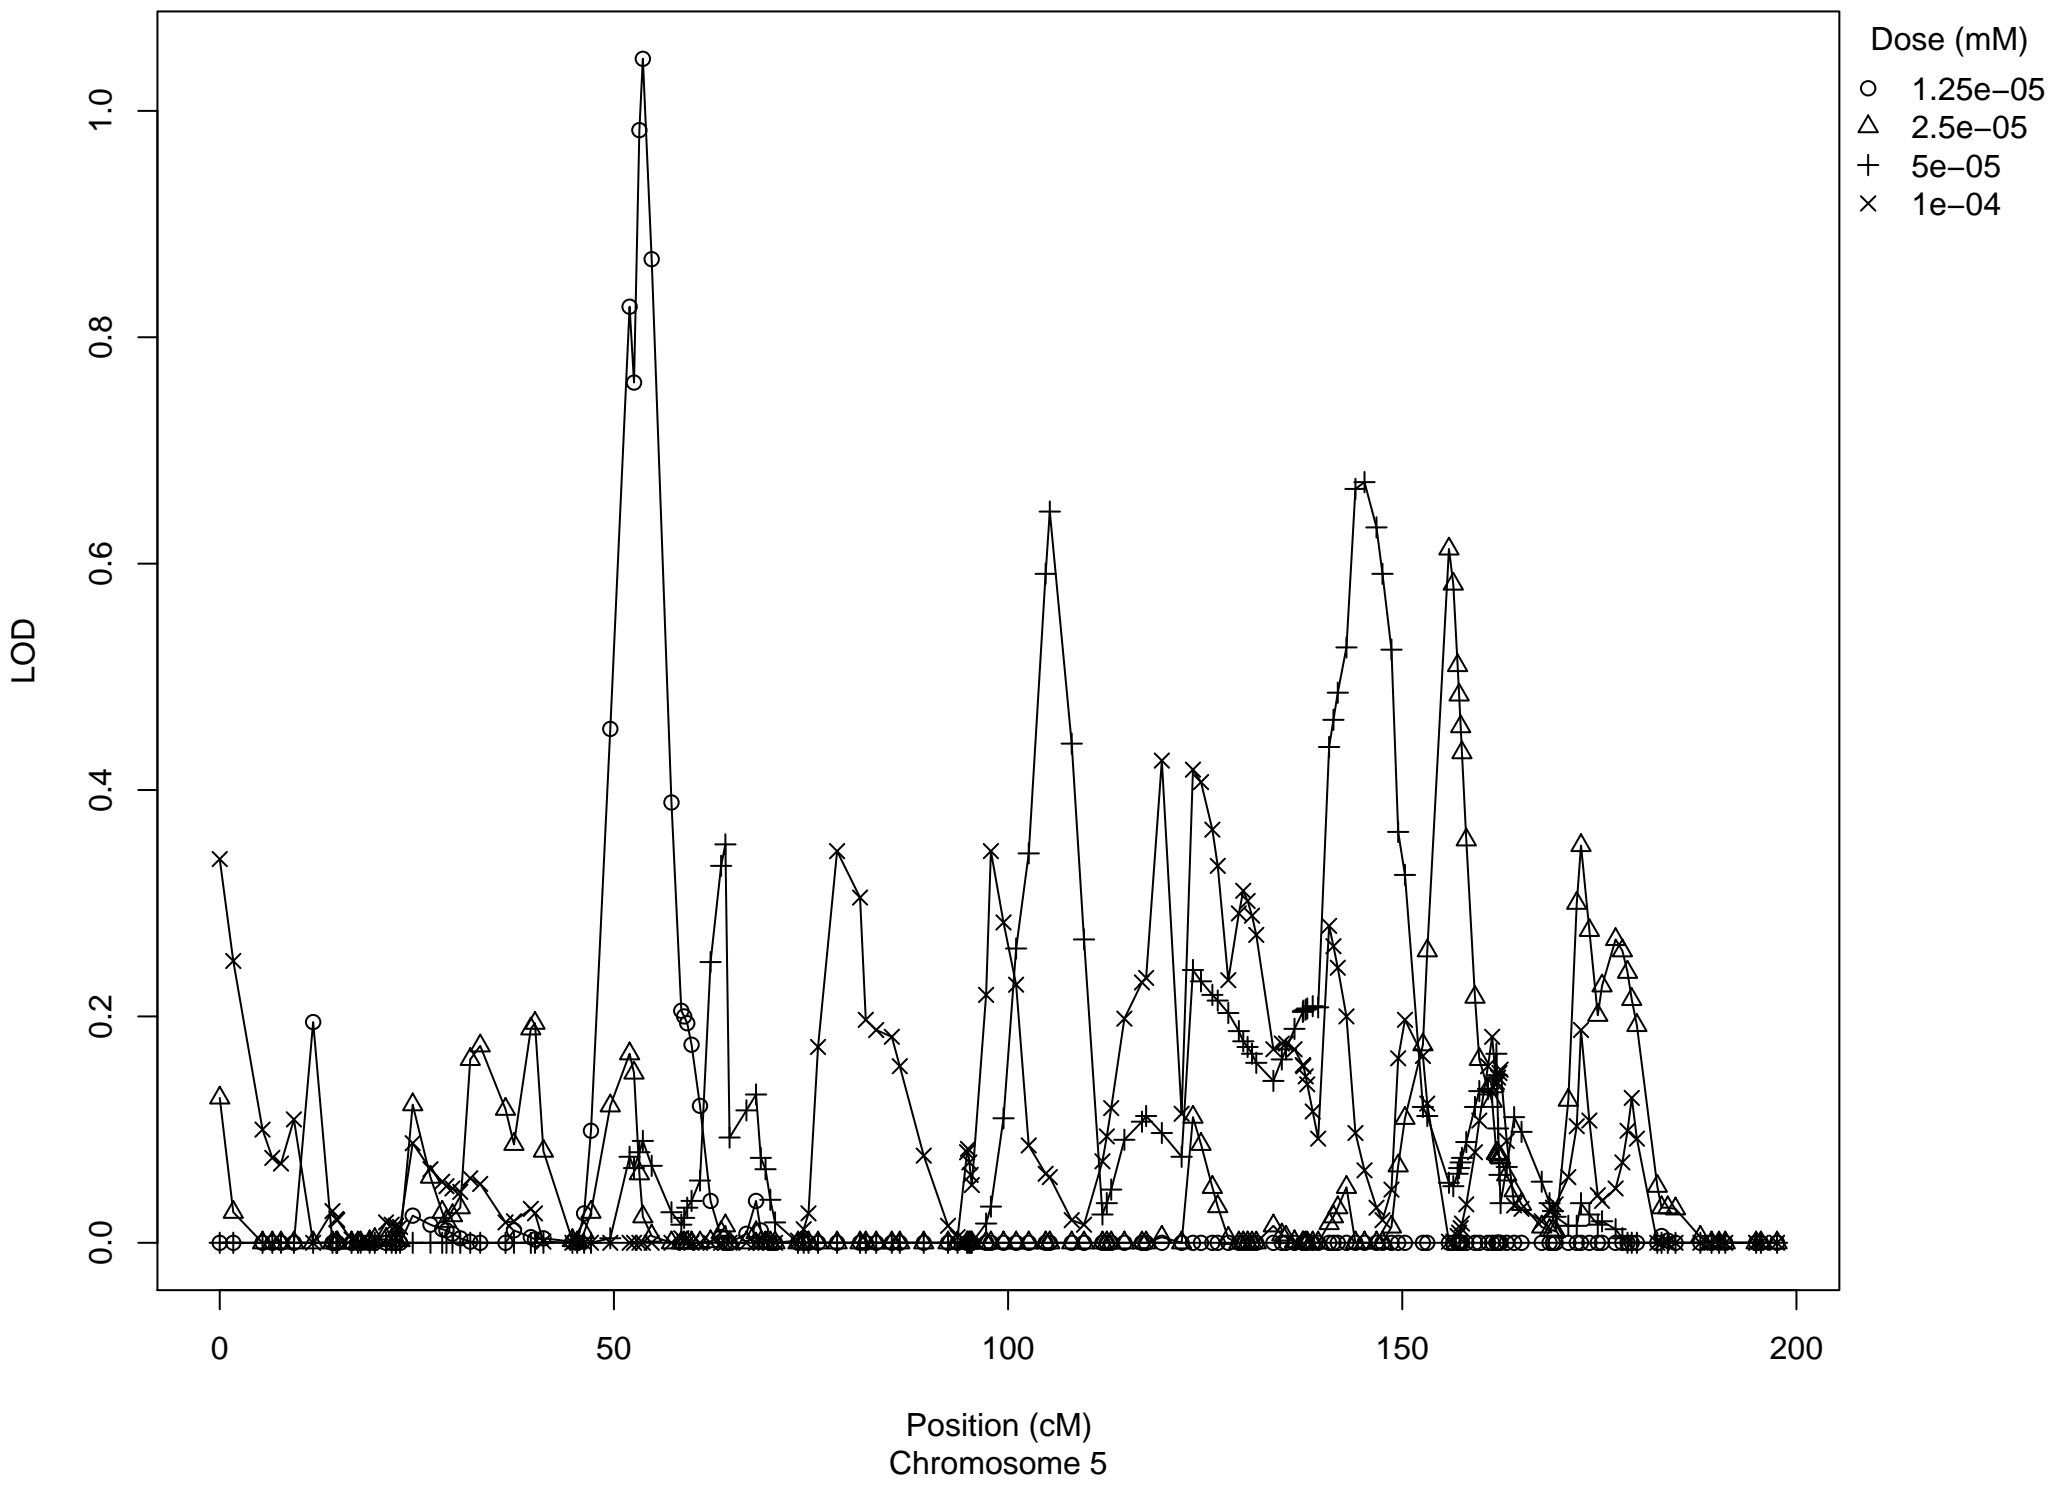

# Vincristine Sulfate Salt (Vinc)

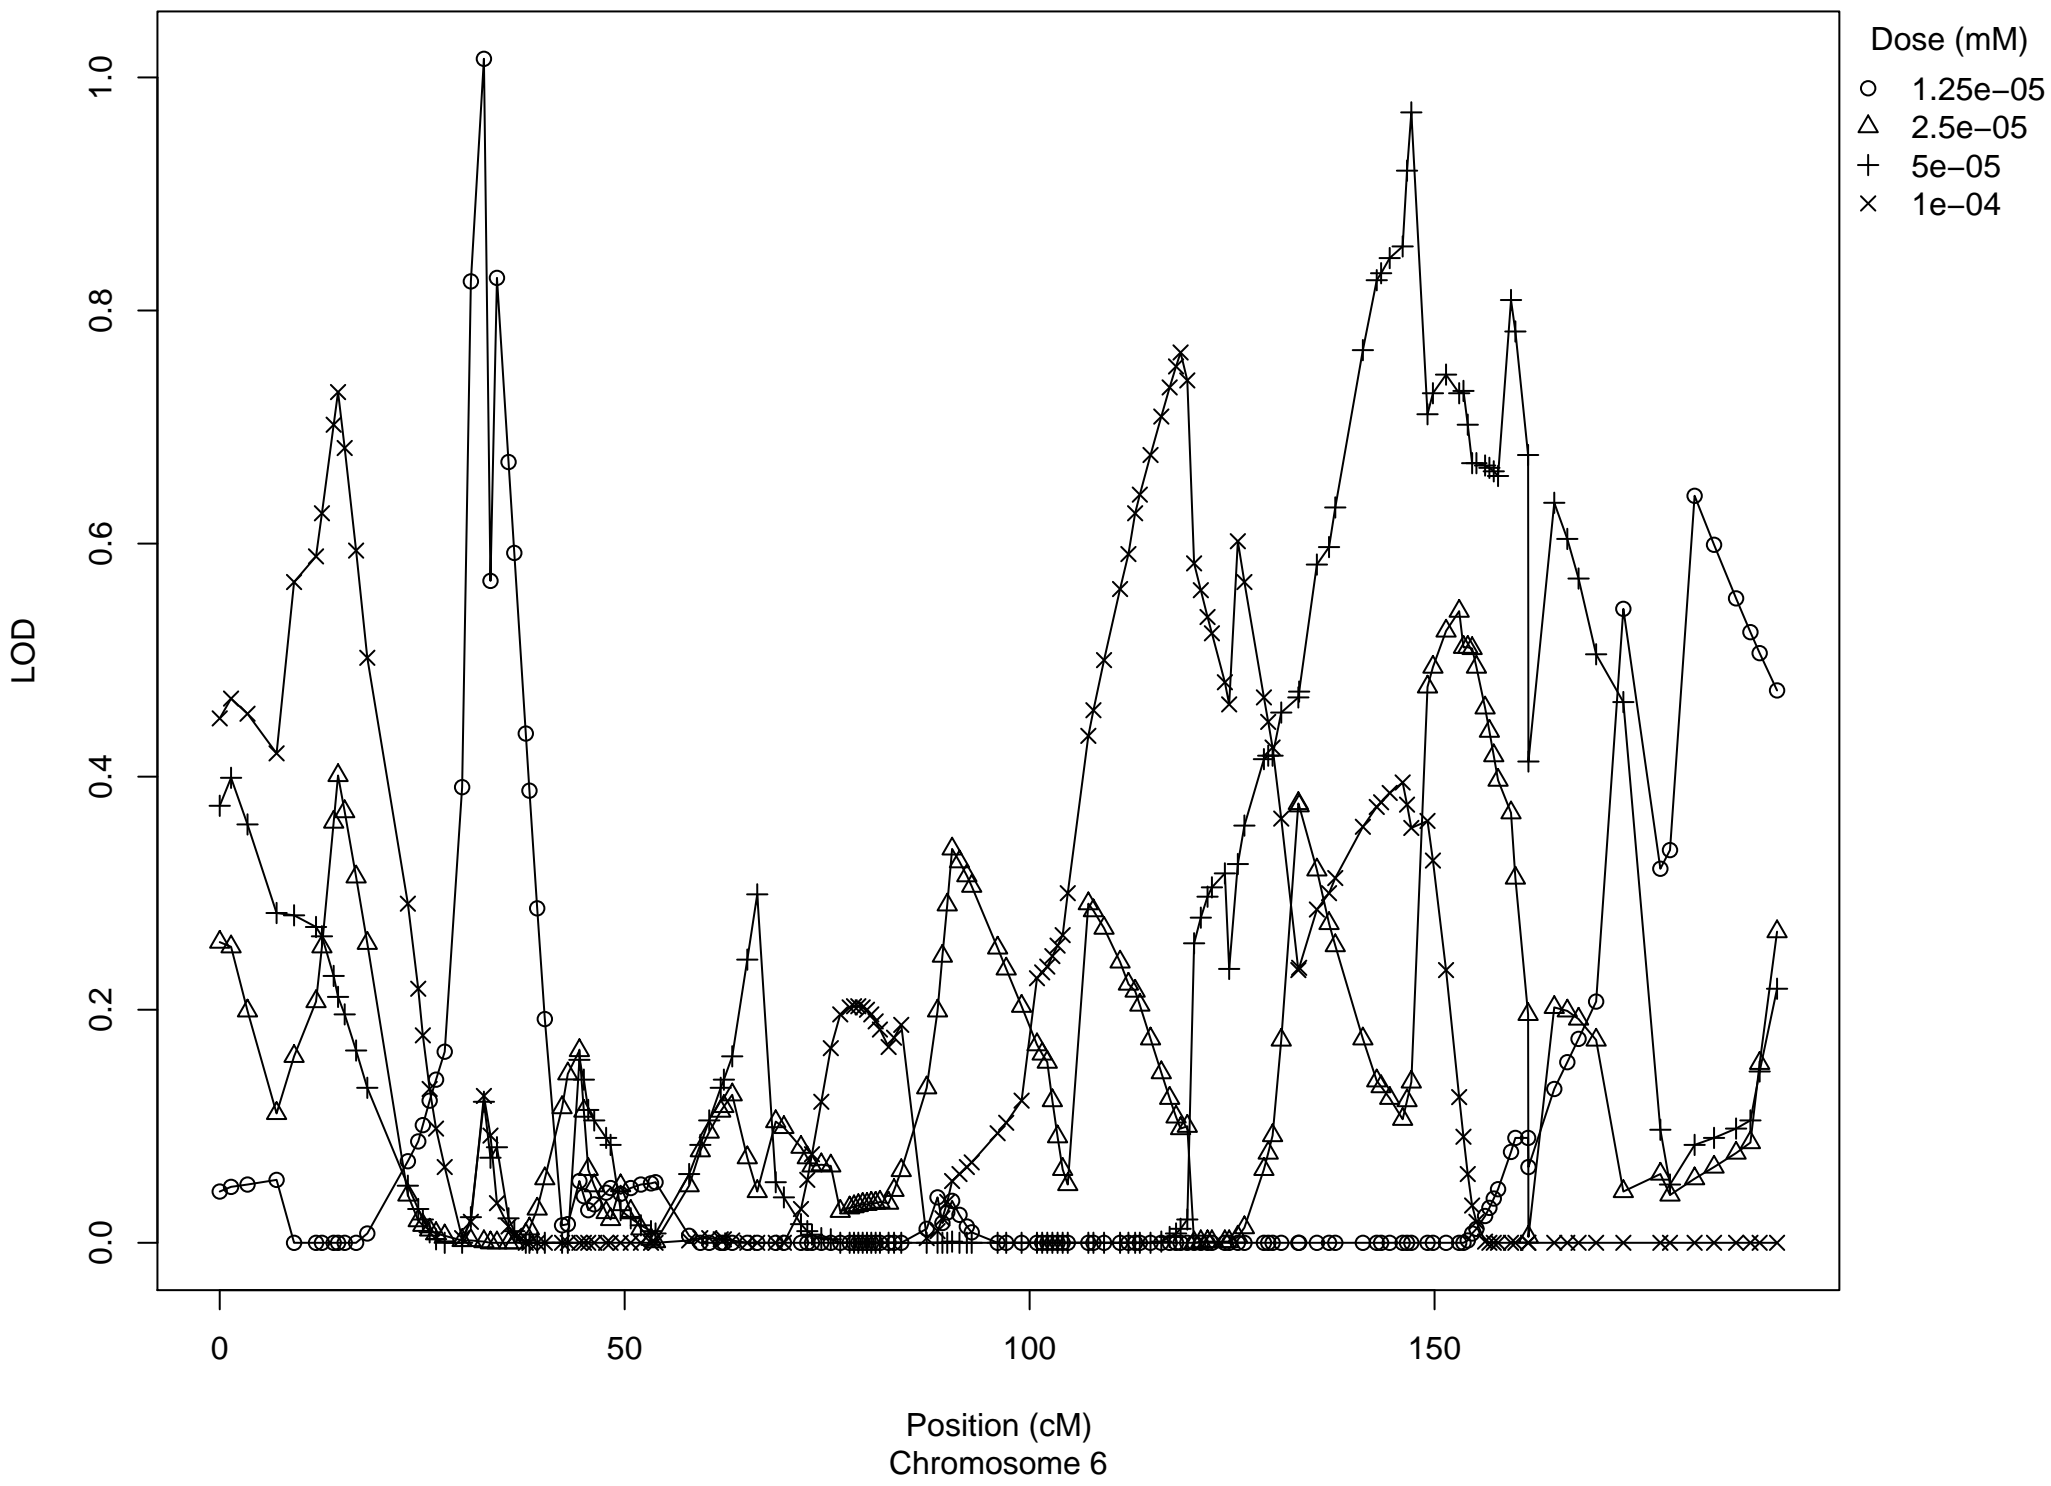



# Vincristine Sulfate Salt (Vinc)

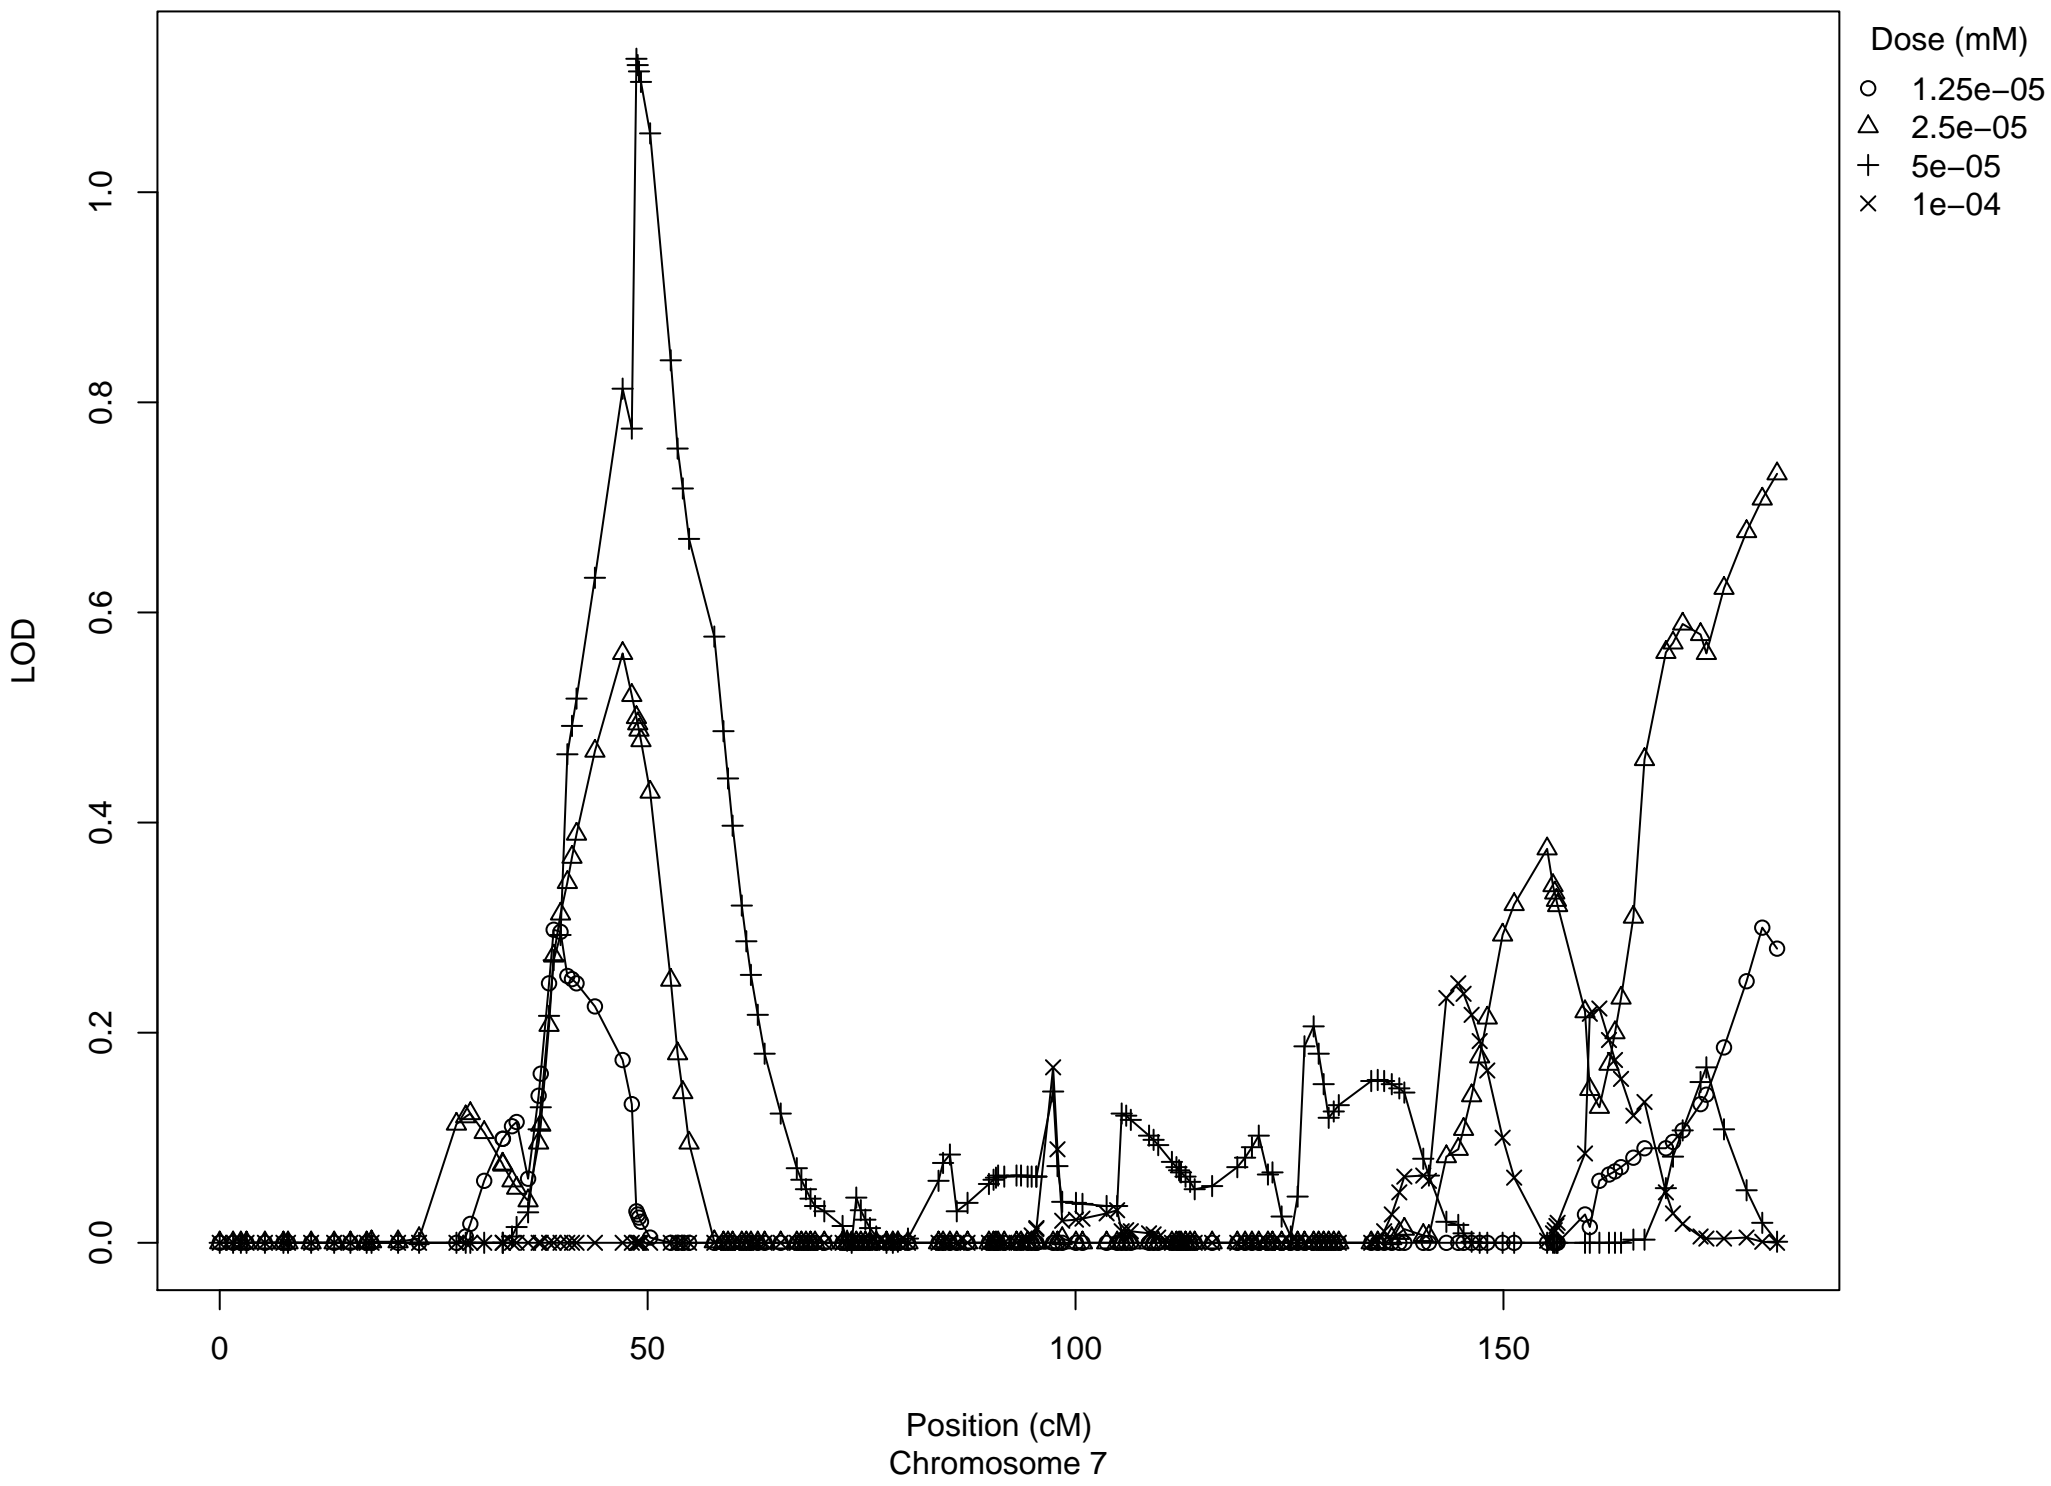

# Vincristine Sulfate Salt (Vinc)

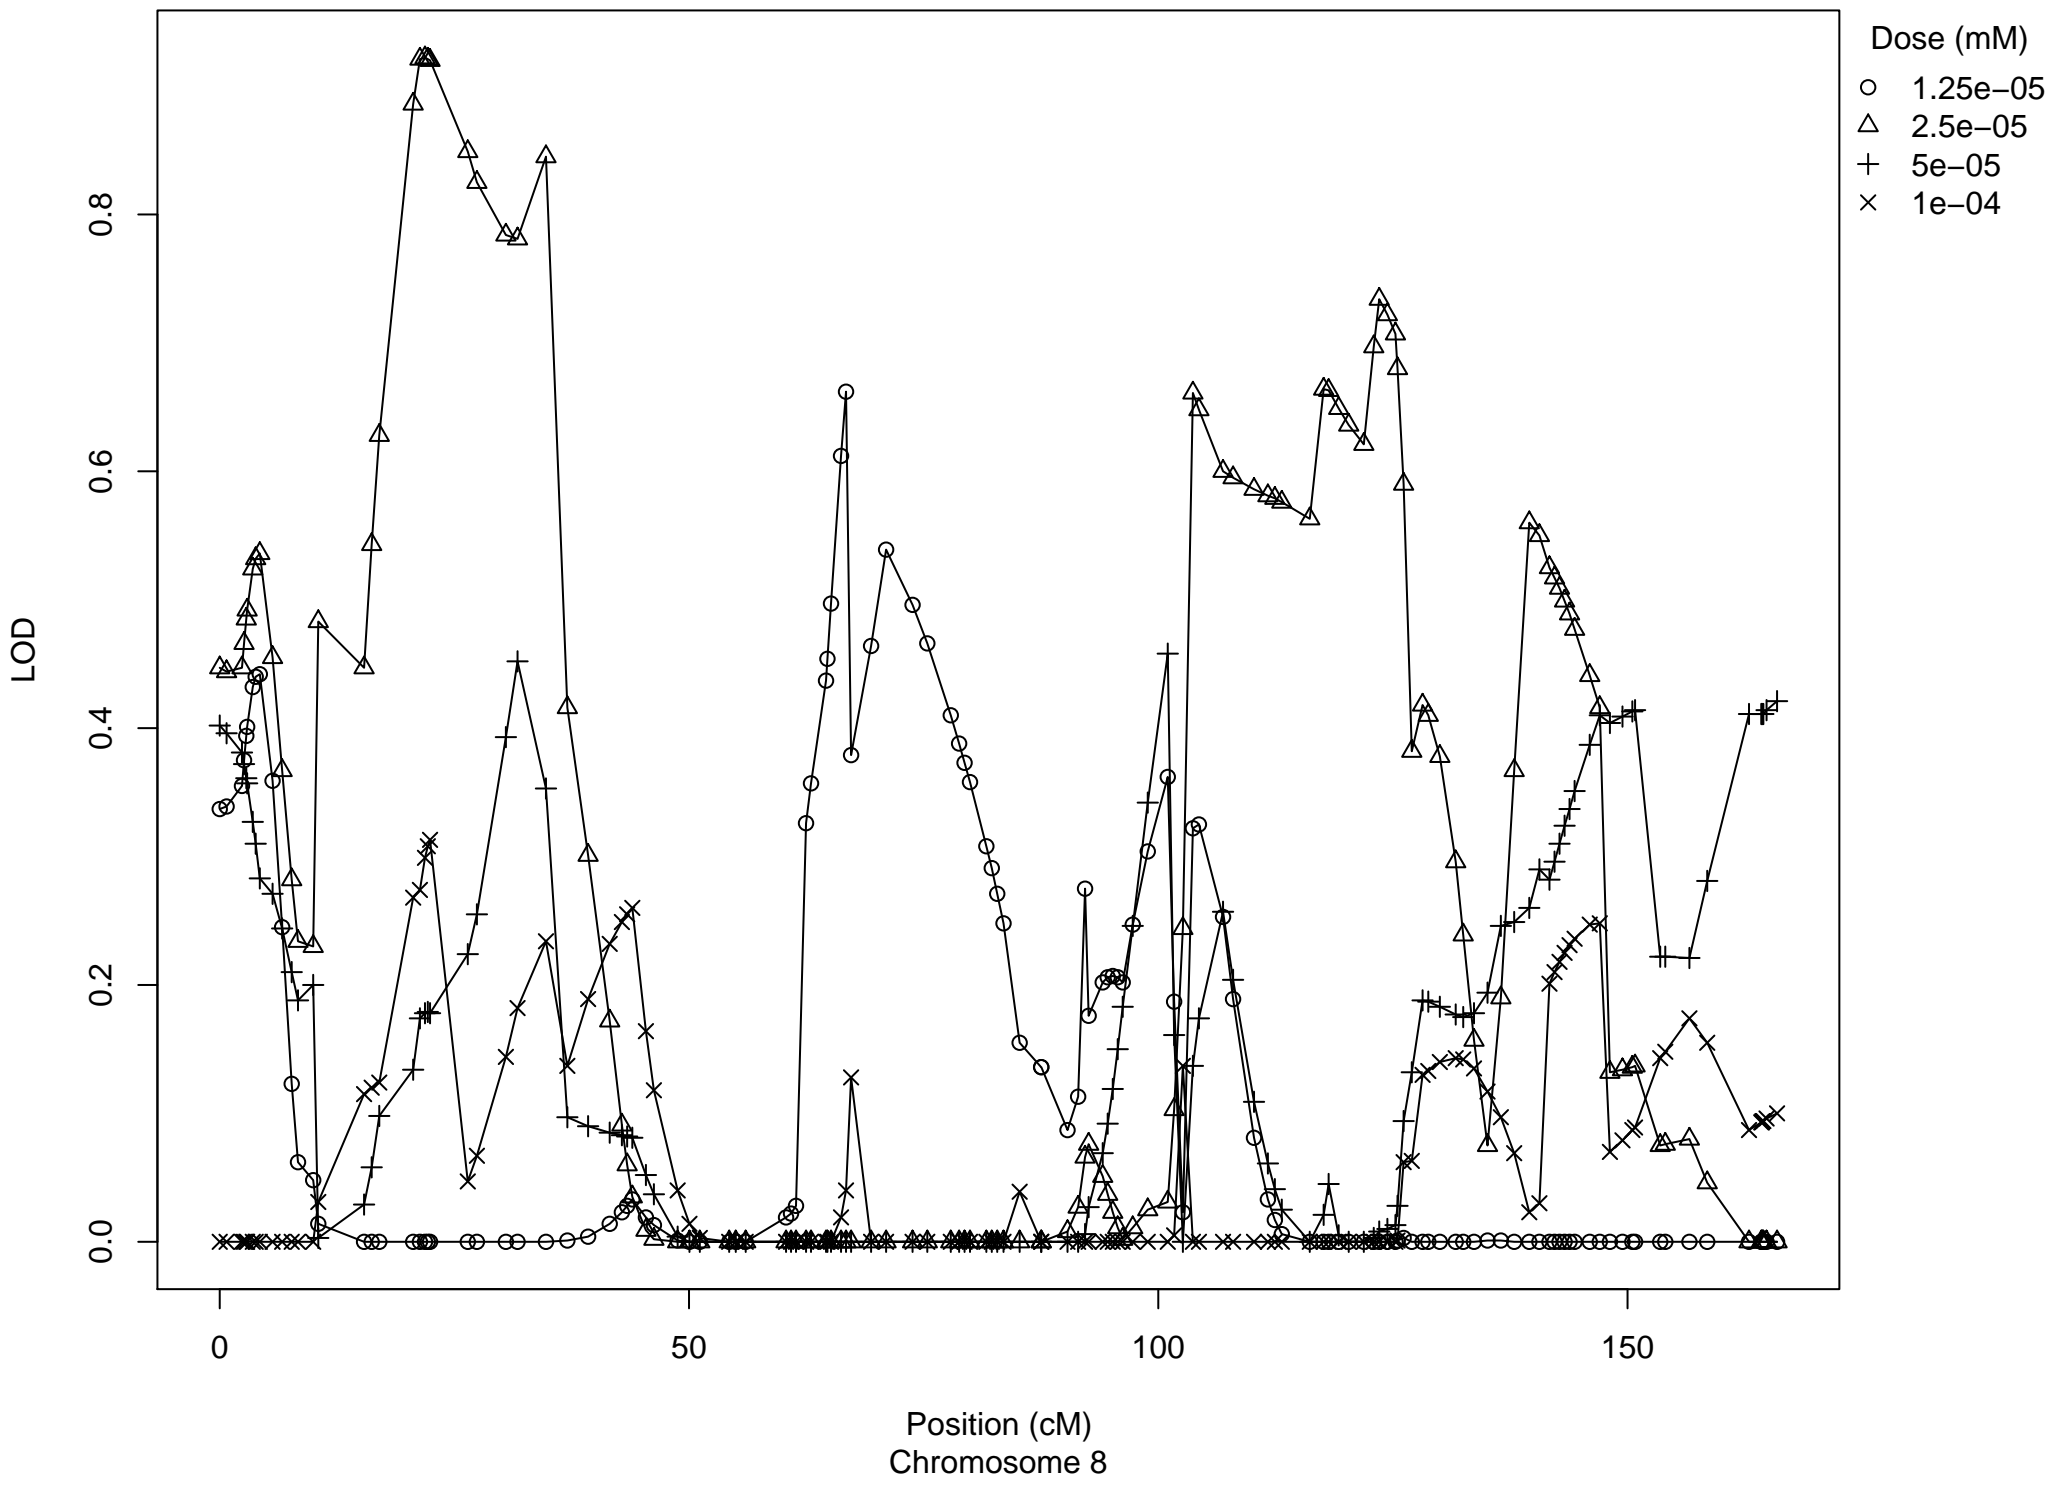

# Vincristine Sulfate Salt (Vinc)

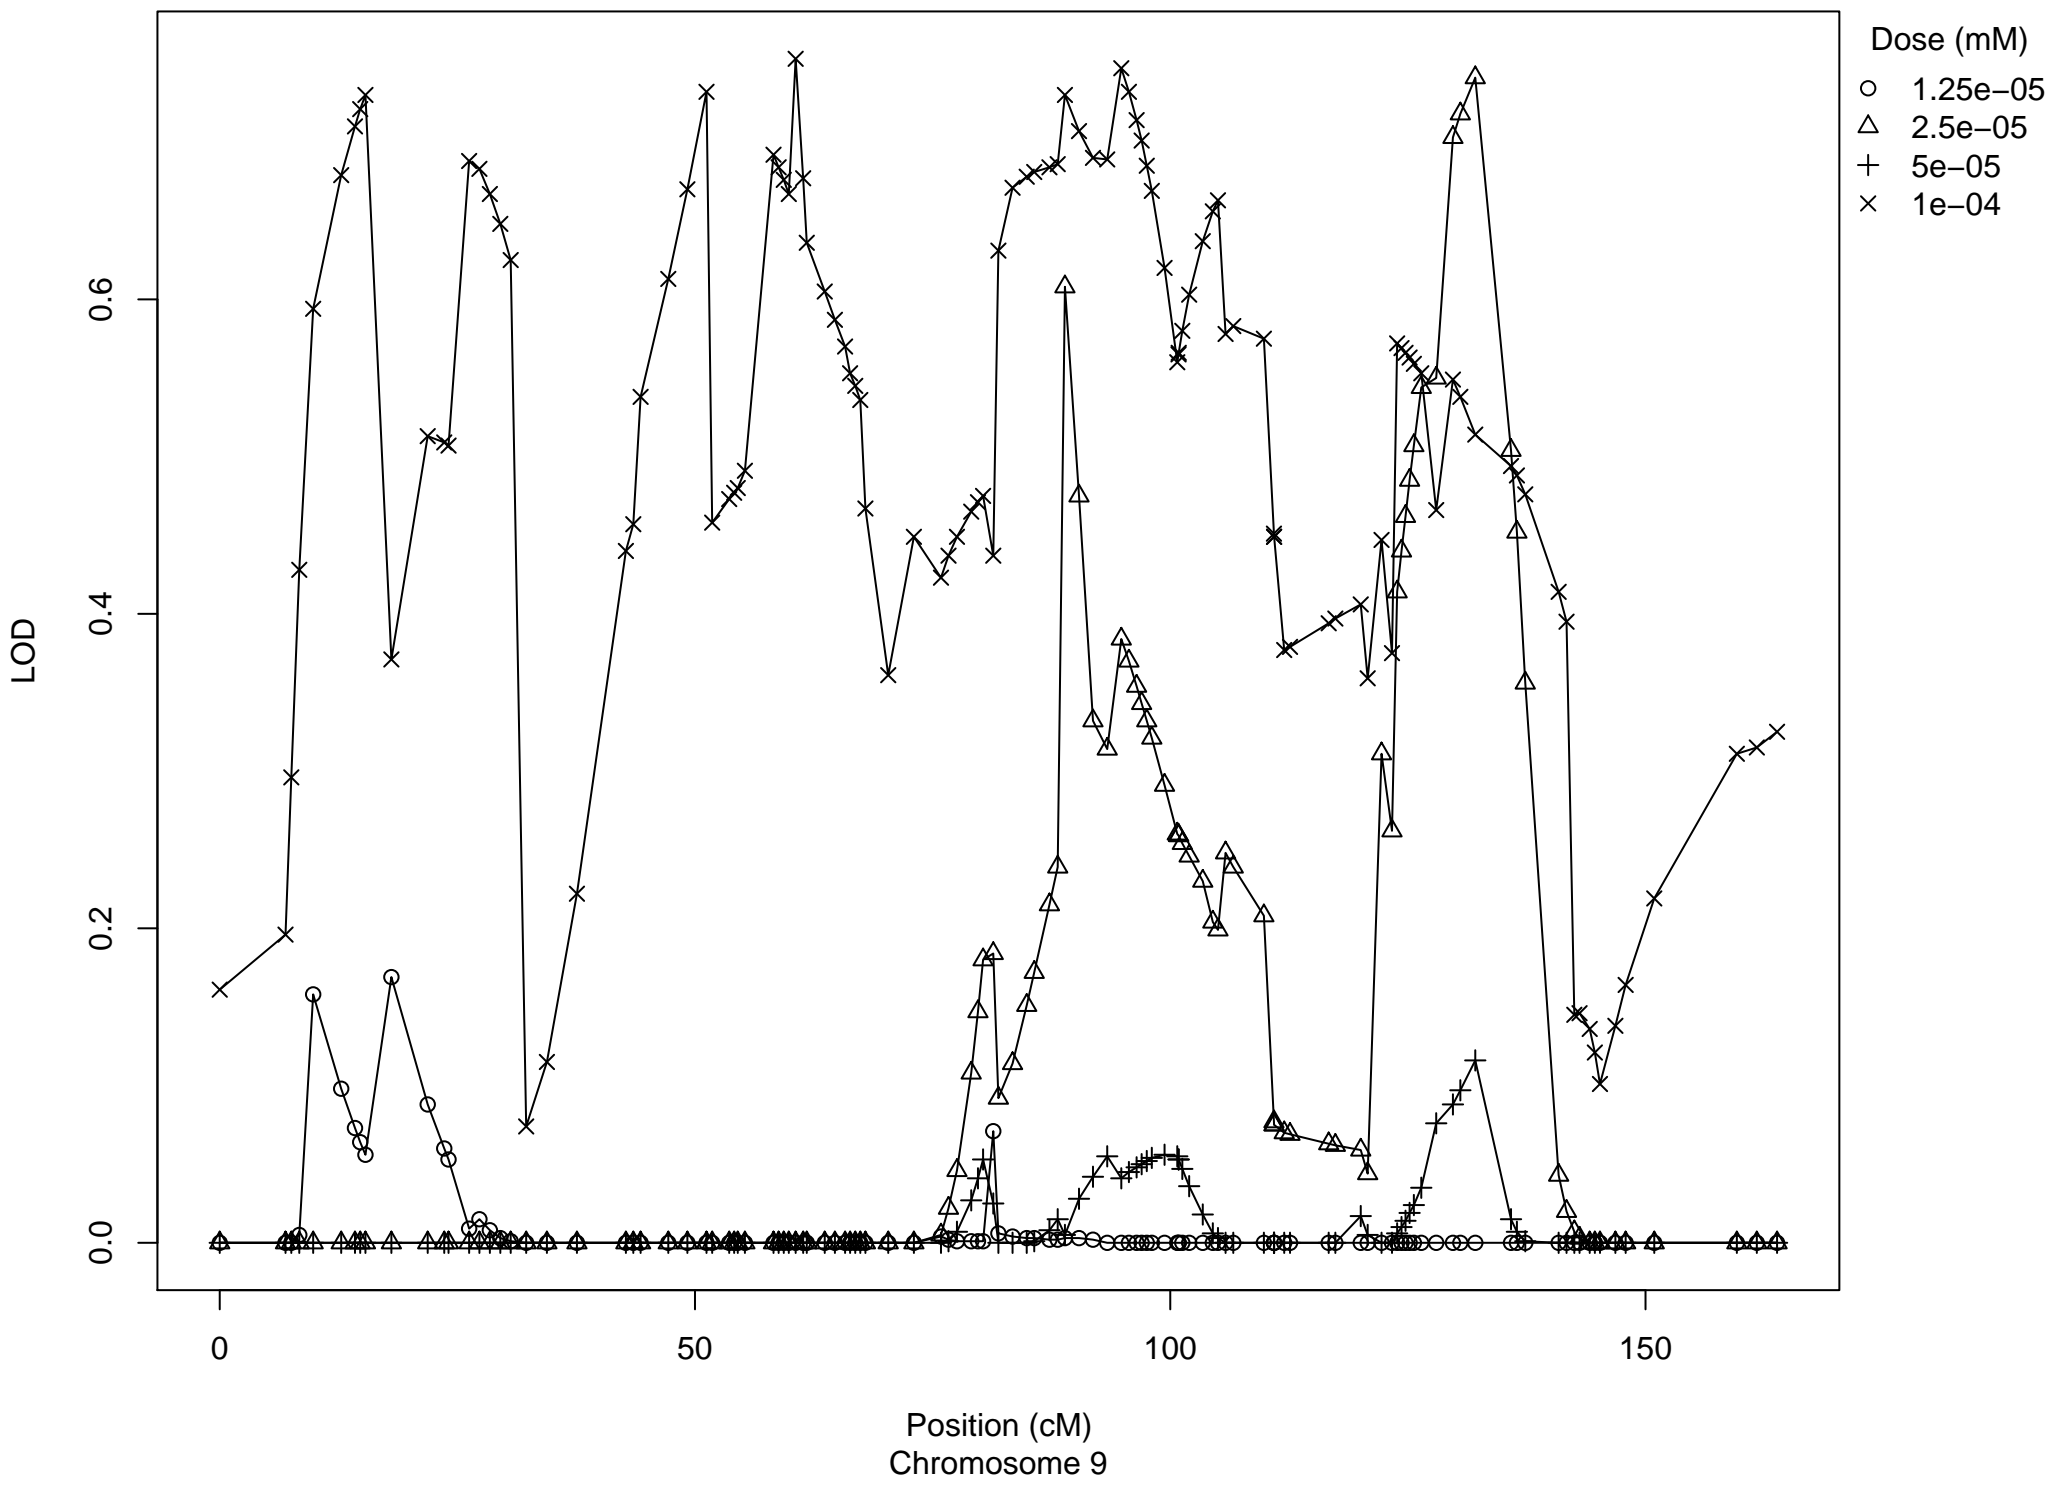

# Vincristine Sulfate Salt (Vinc)

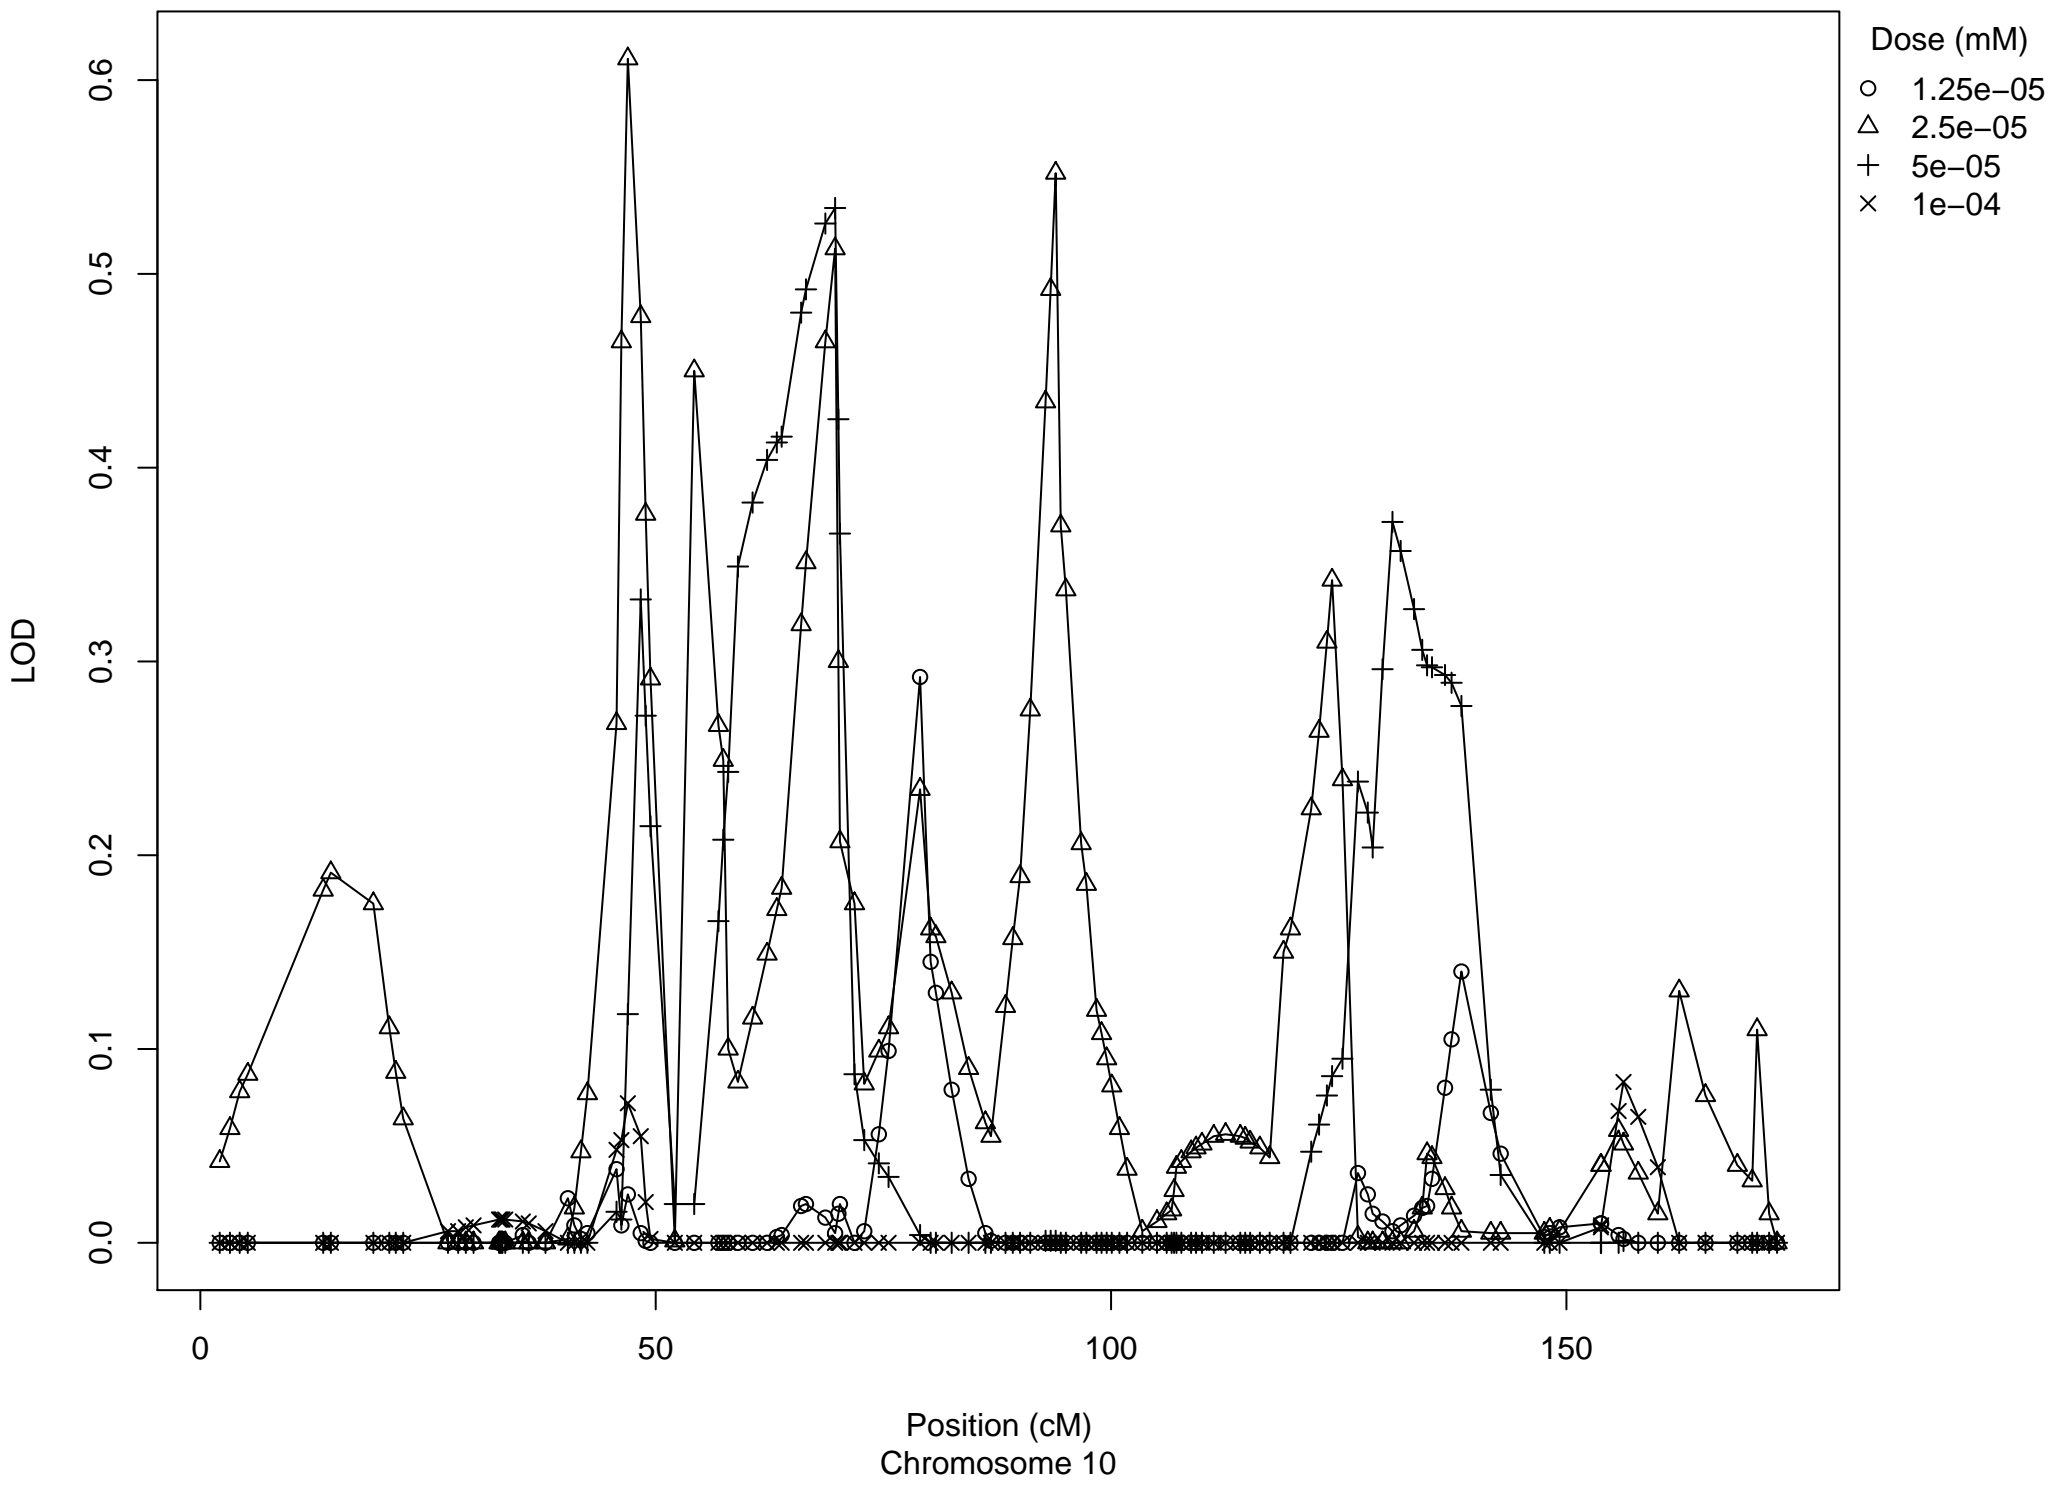

# Vincristine Sulfate Salt (Vinc)

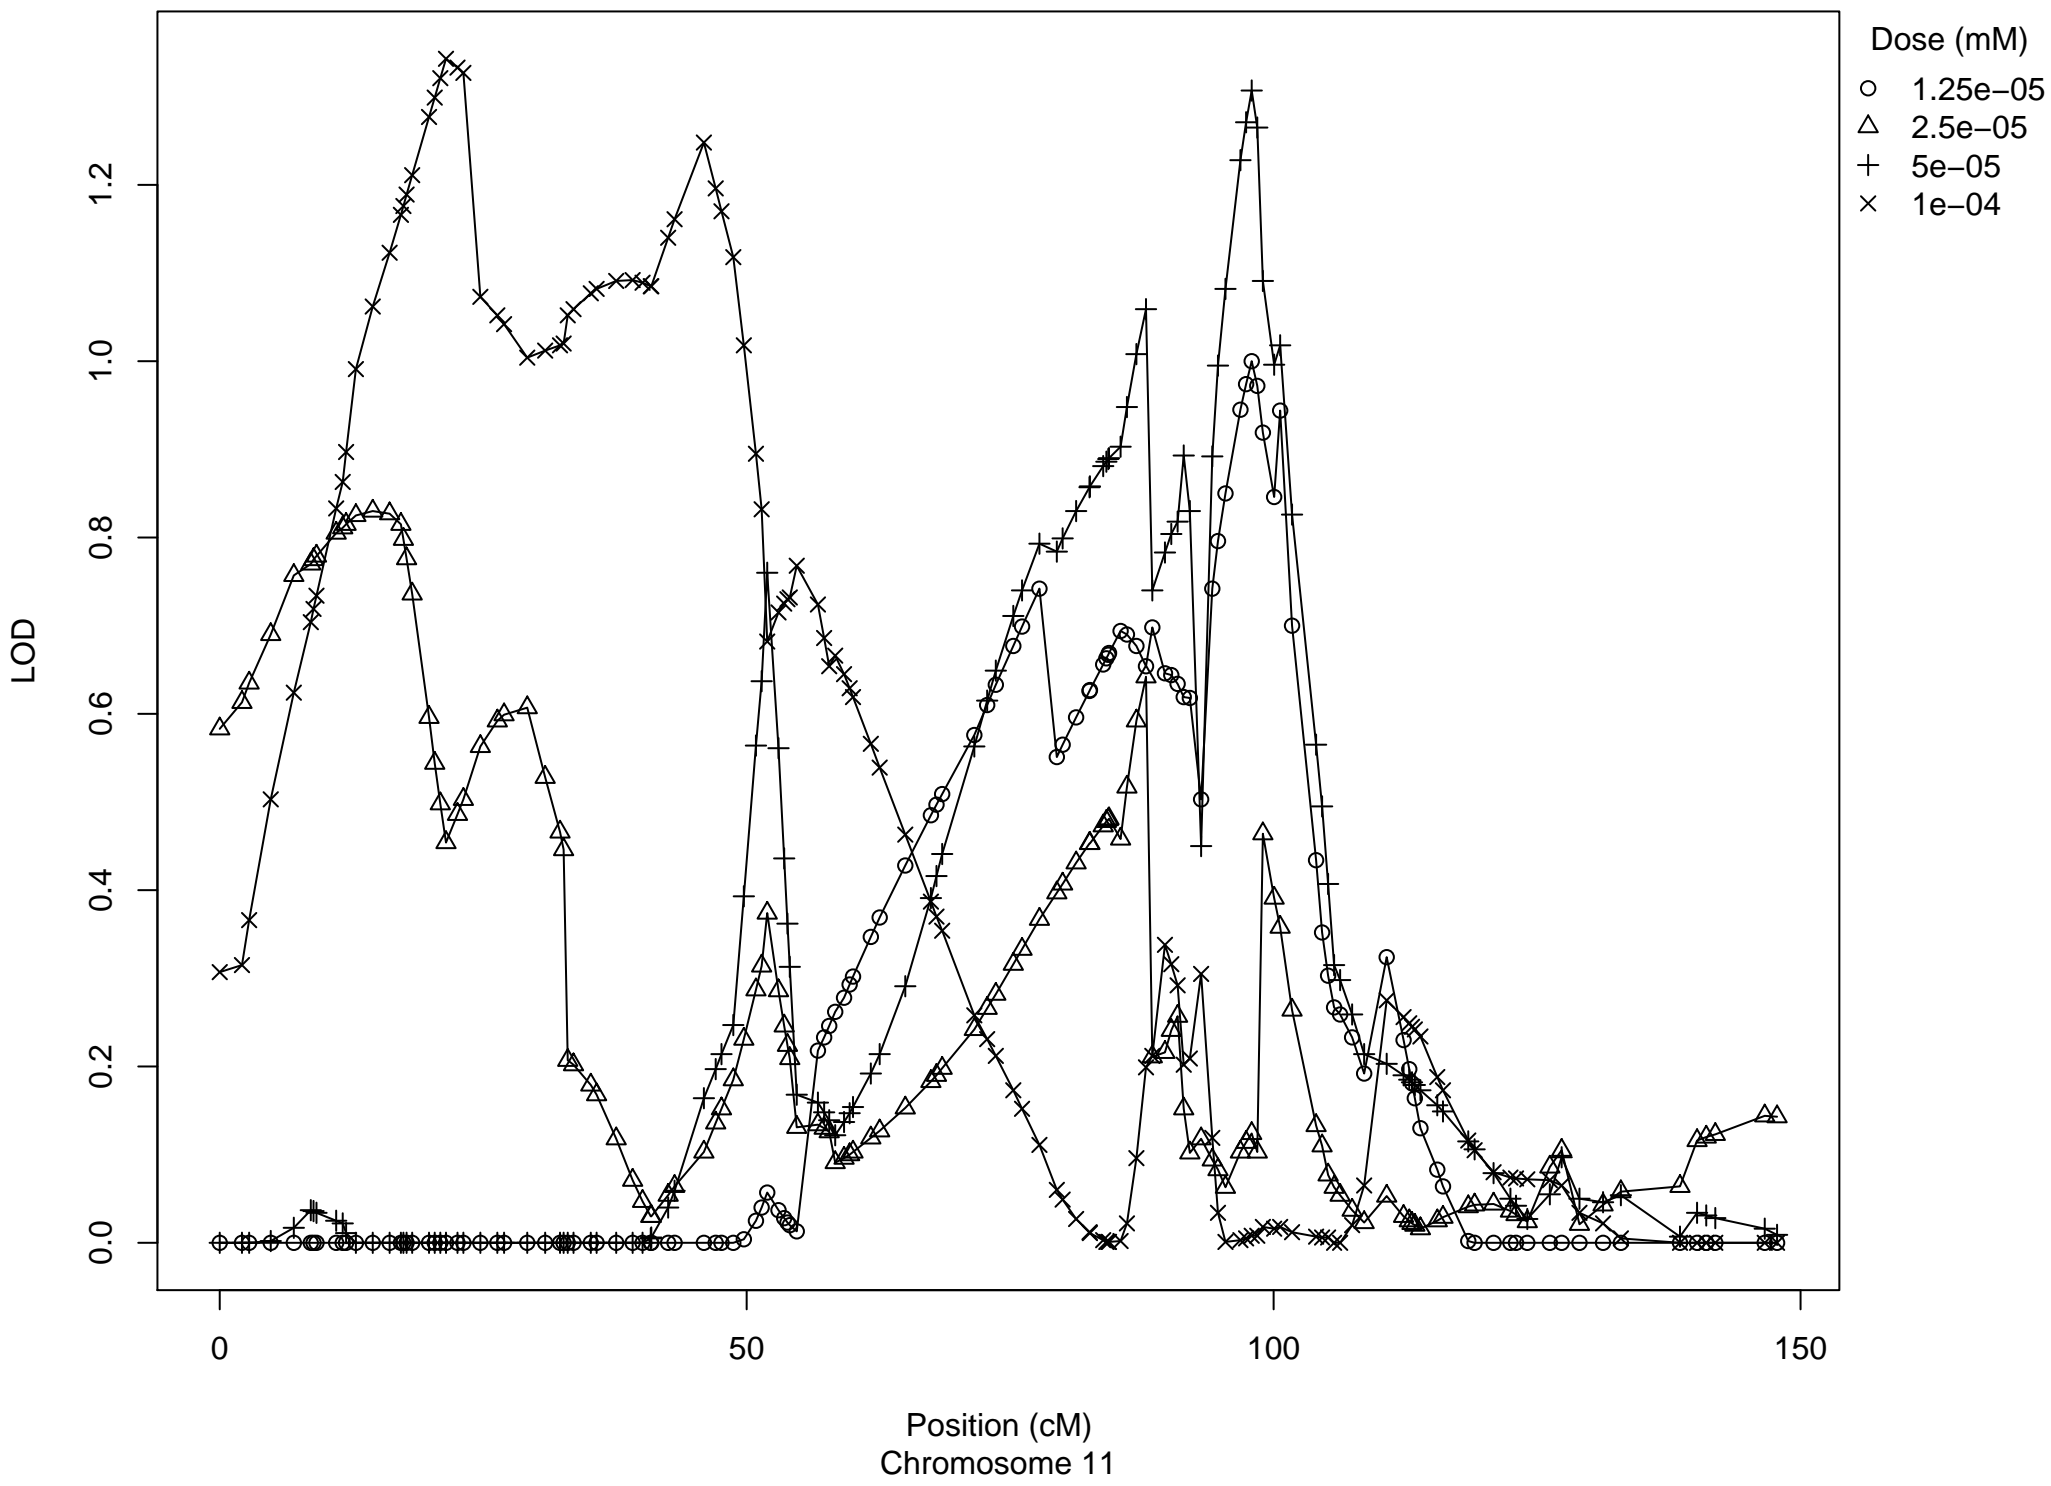

# Vincristine Sulfate Salt (Vinc)

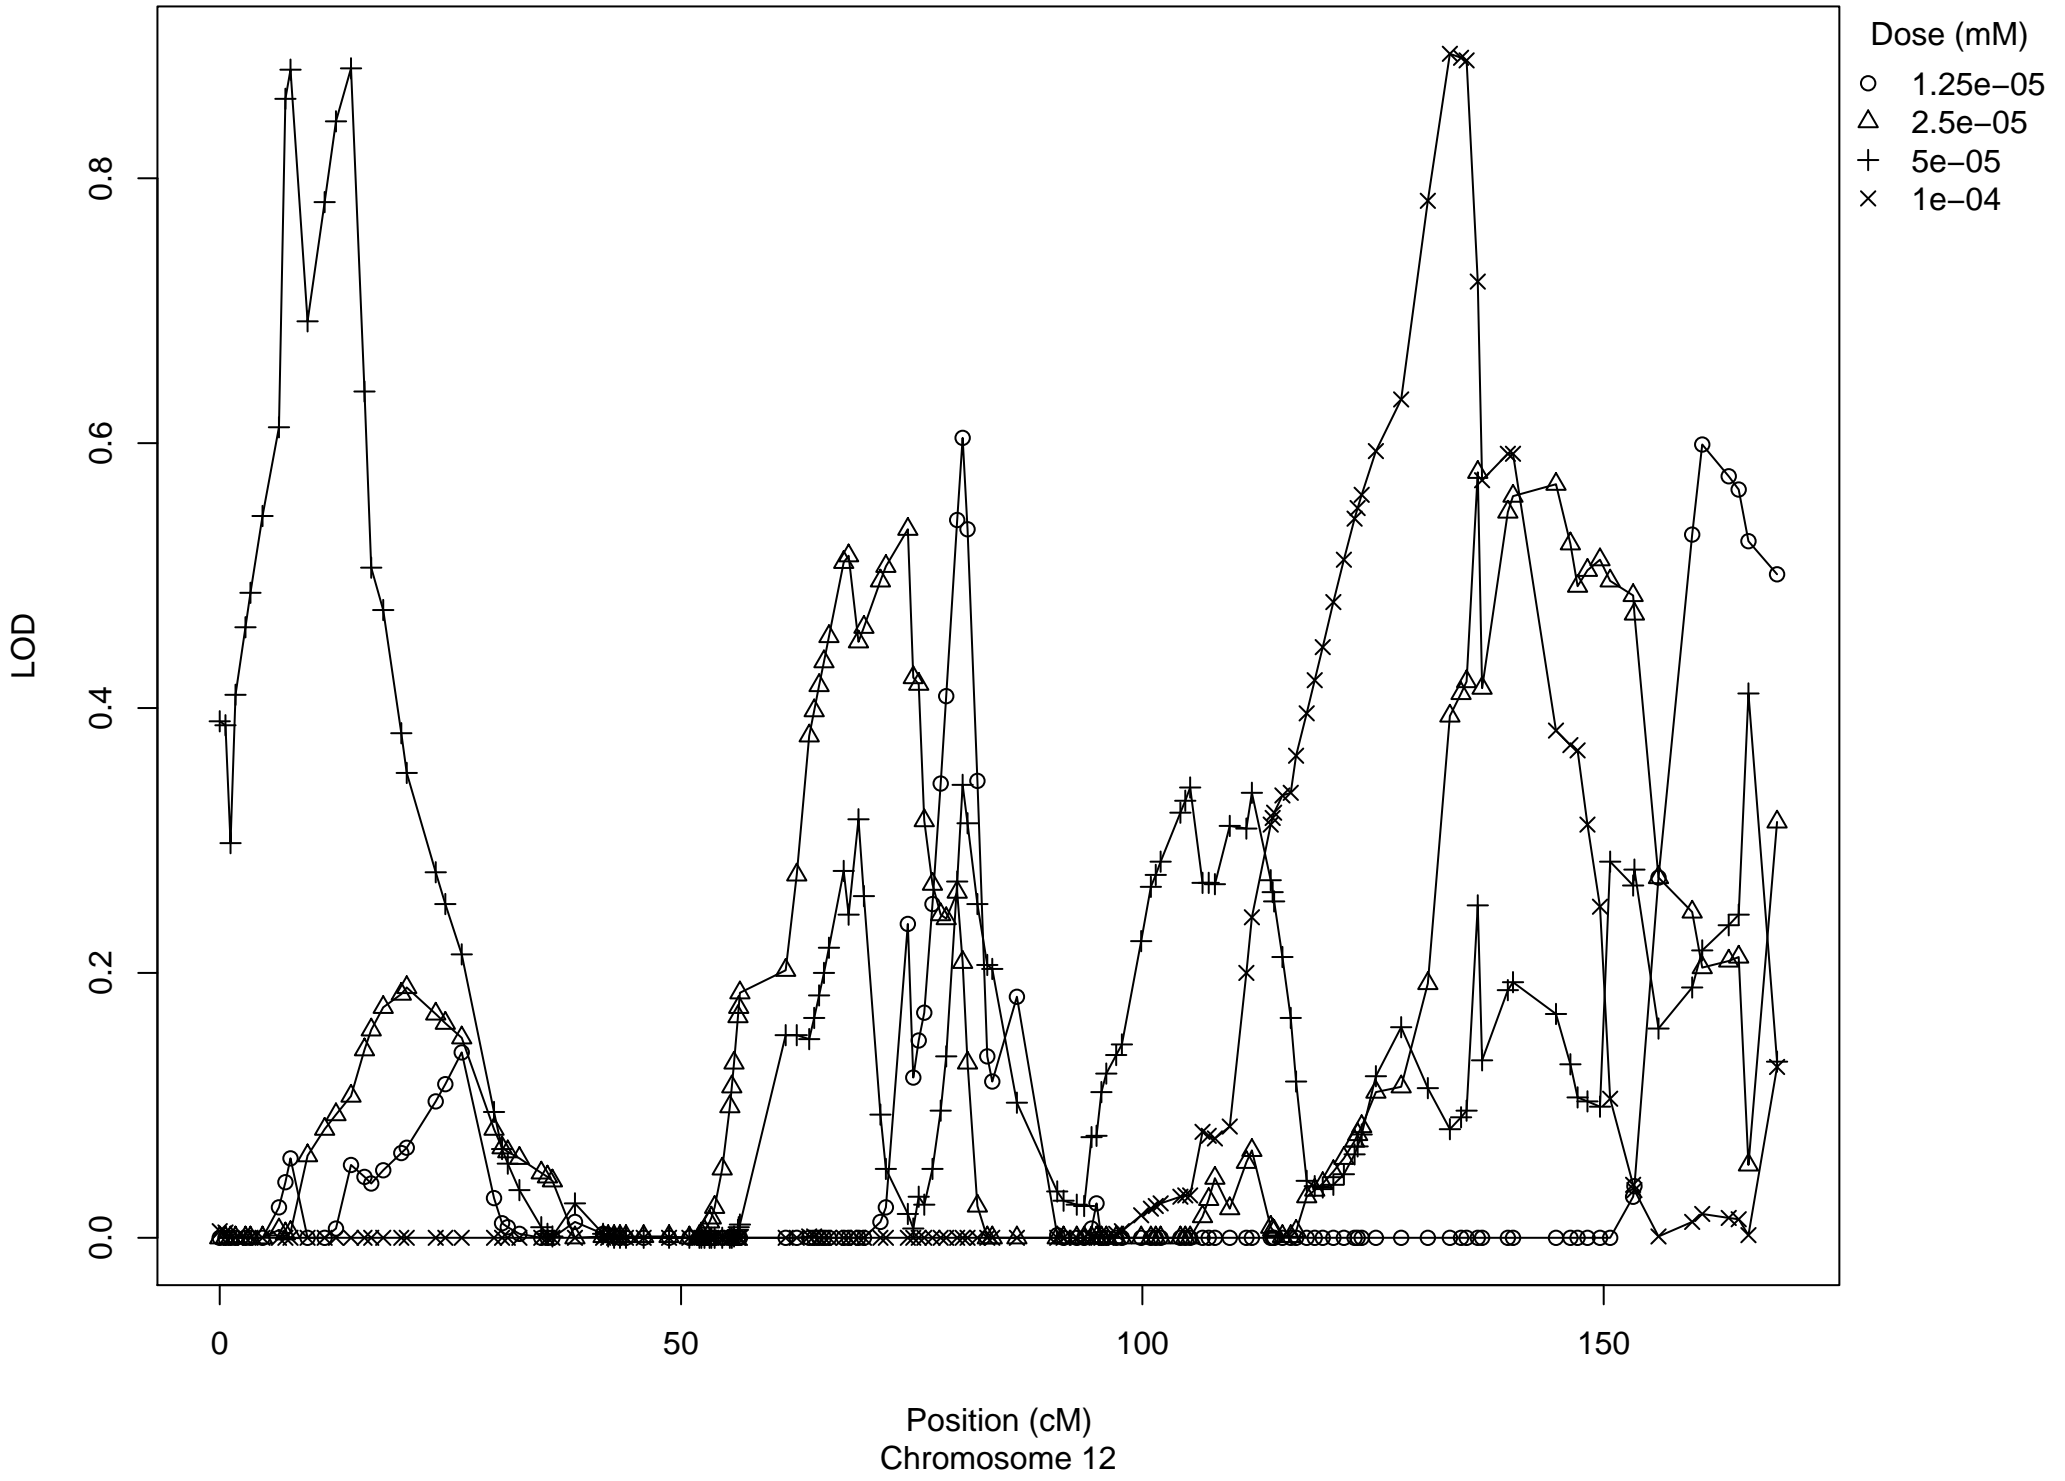

# Vincristine Sulfate Salt (Vinc)

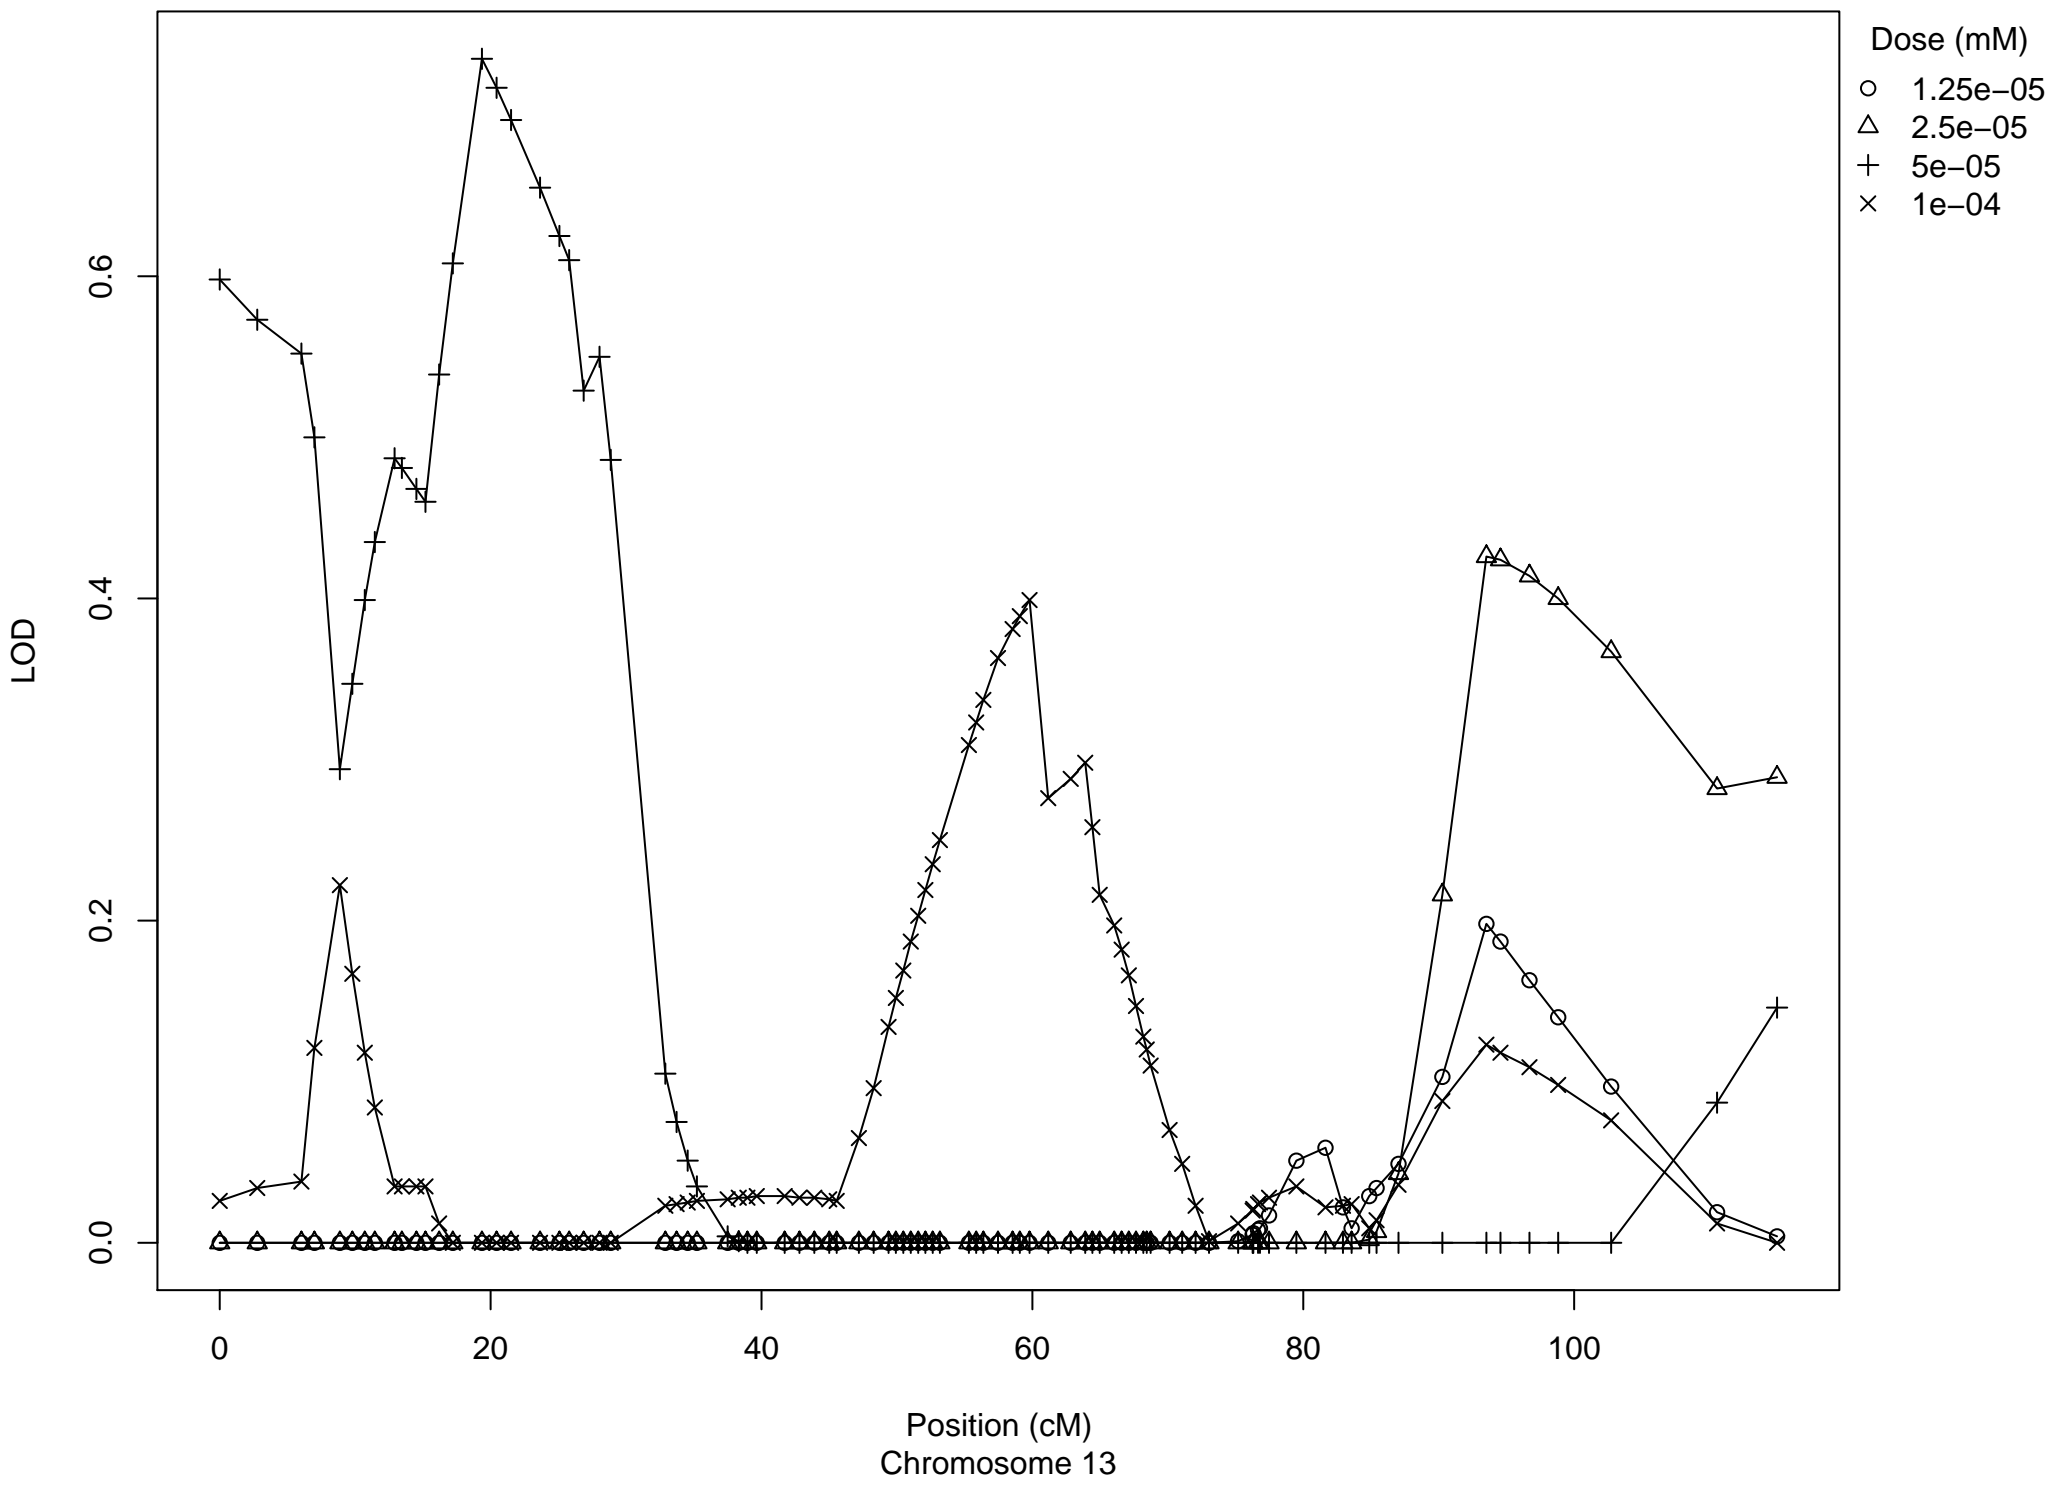

# Vincristine Sulfate Salt (Vinc)

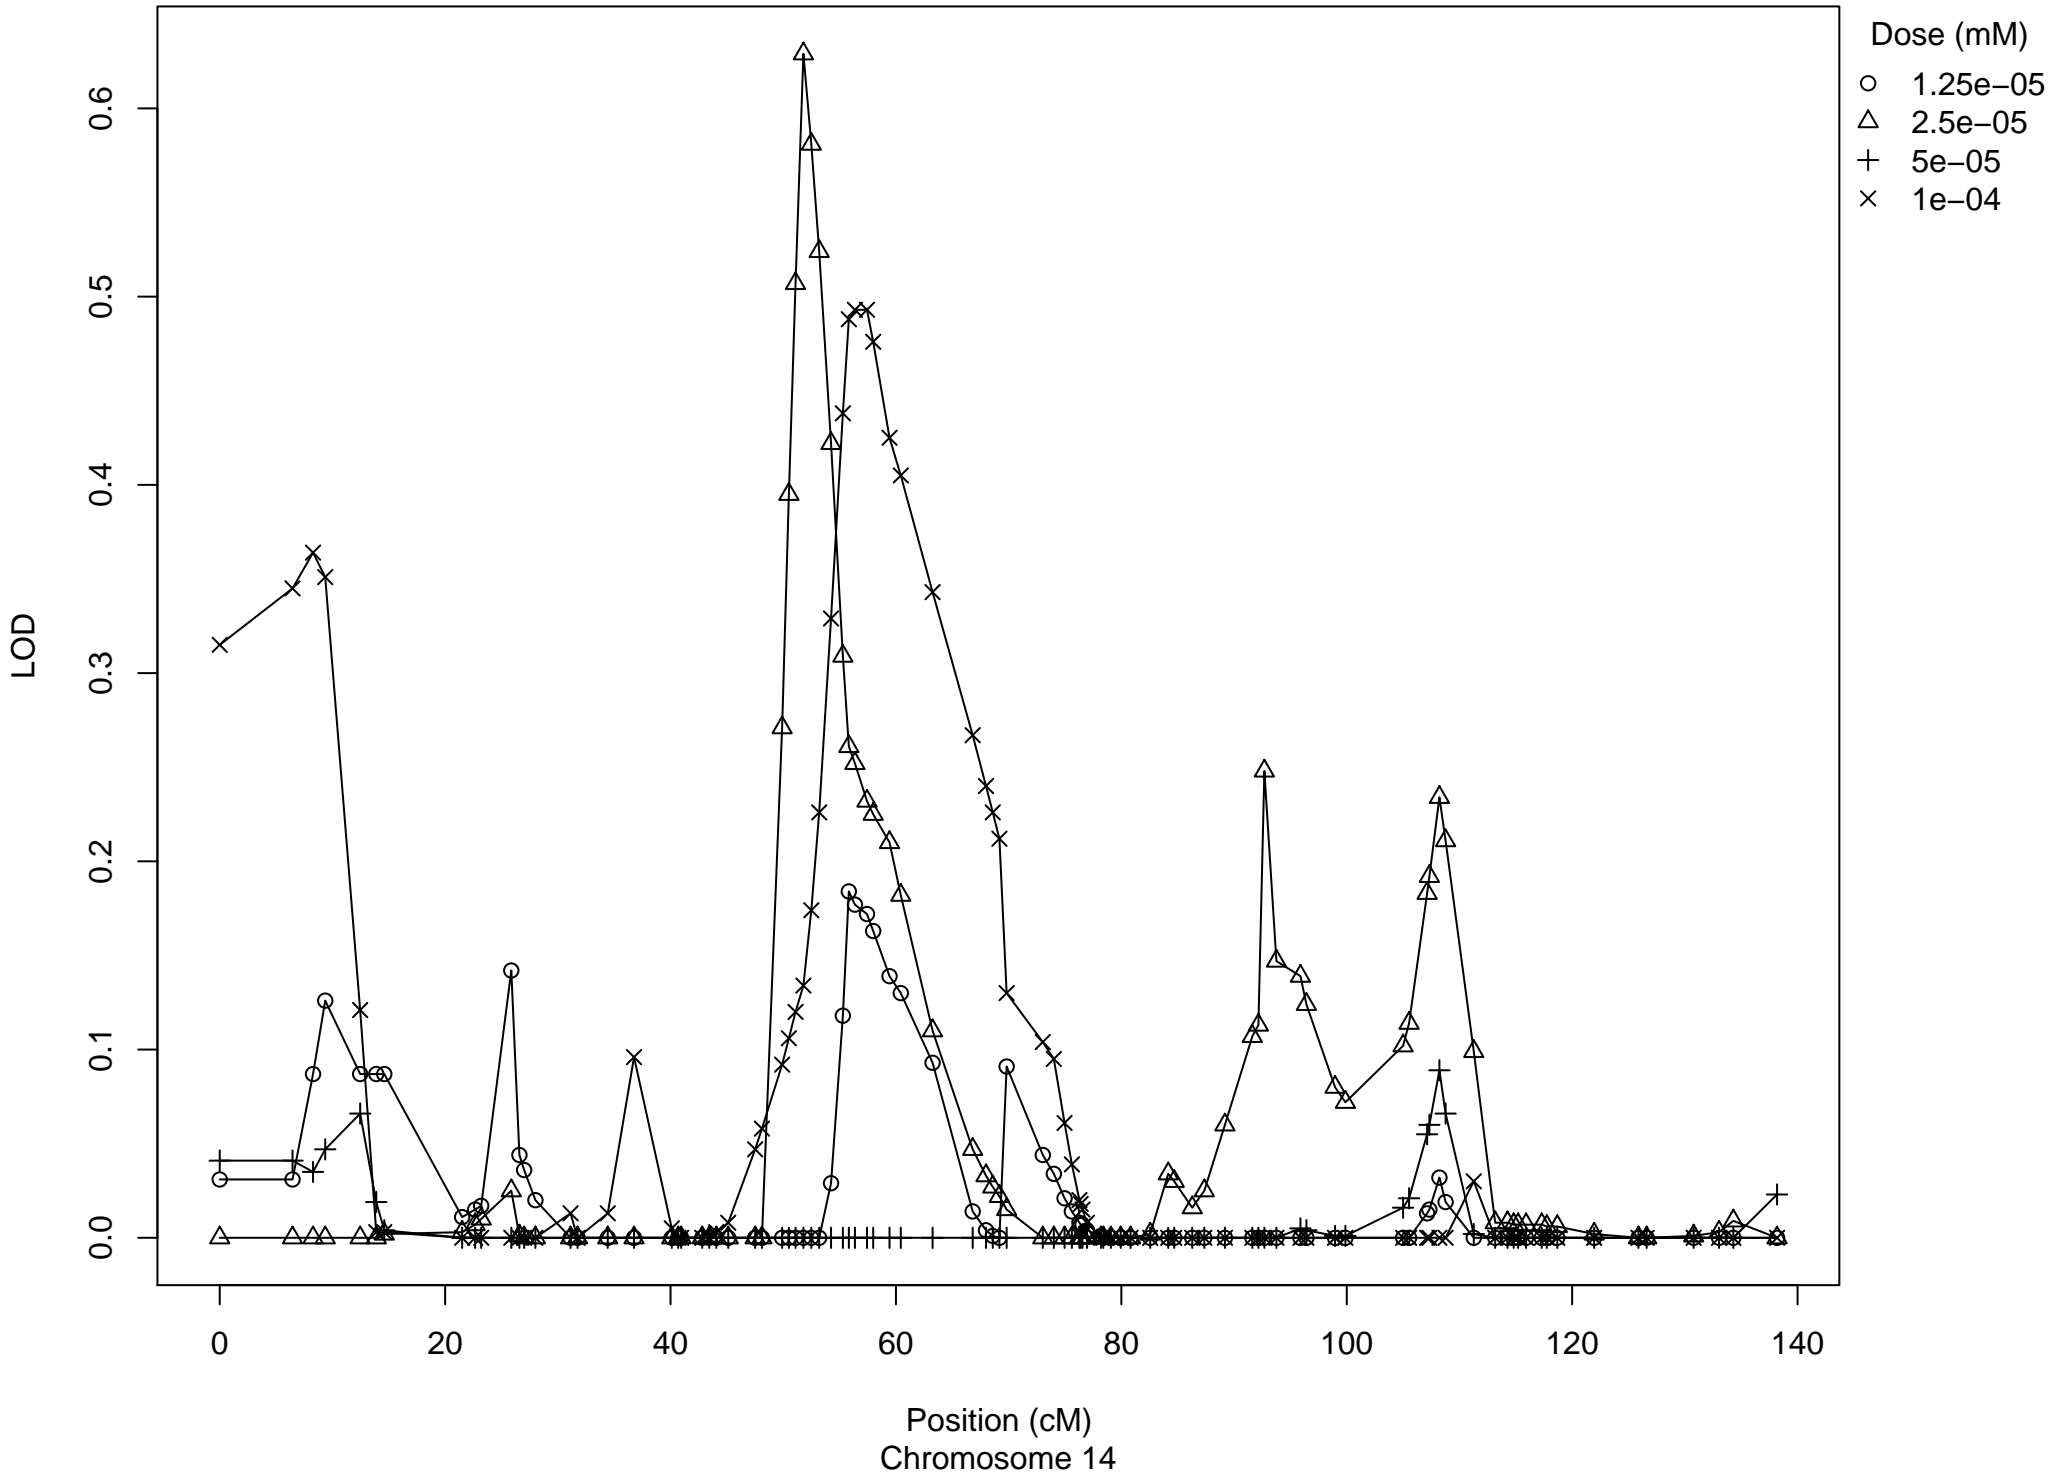



# Vincristine Sulfate Salt (Vinc)

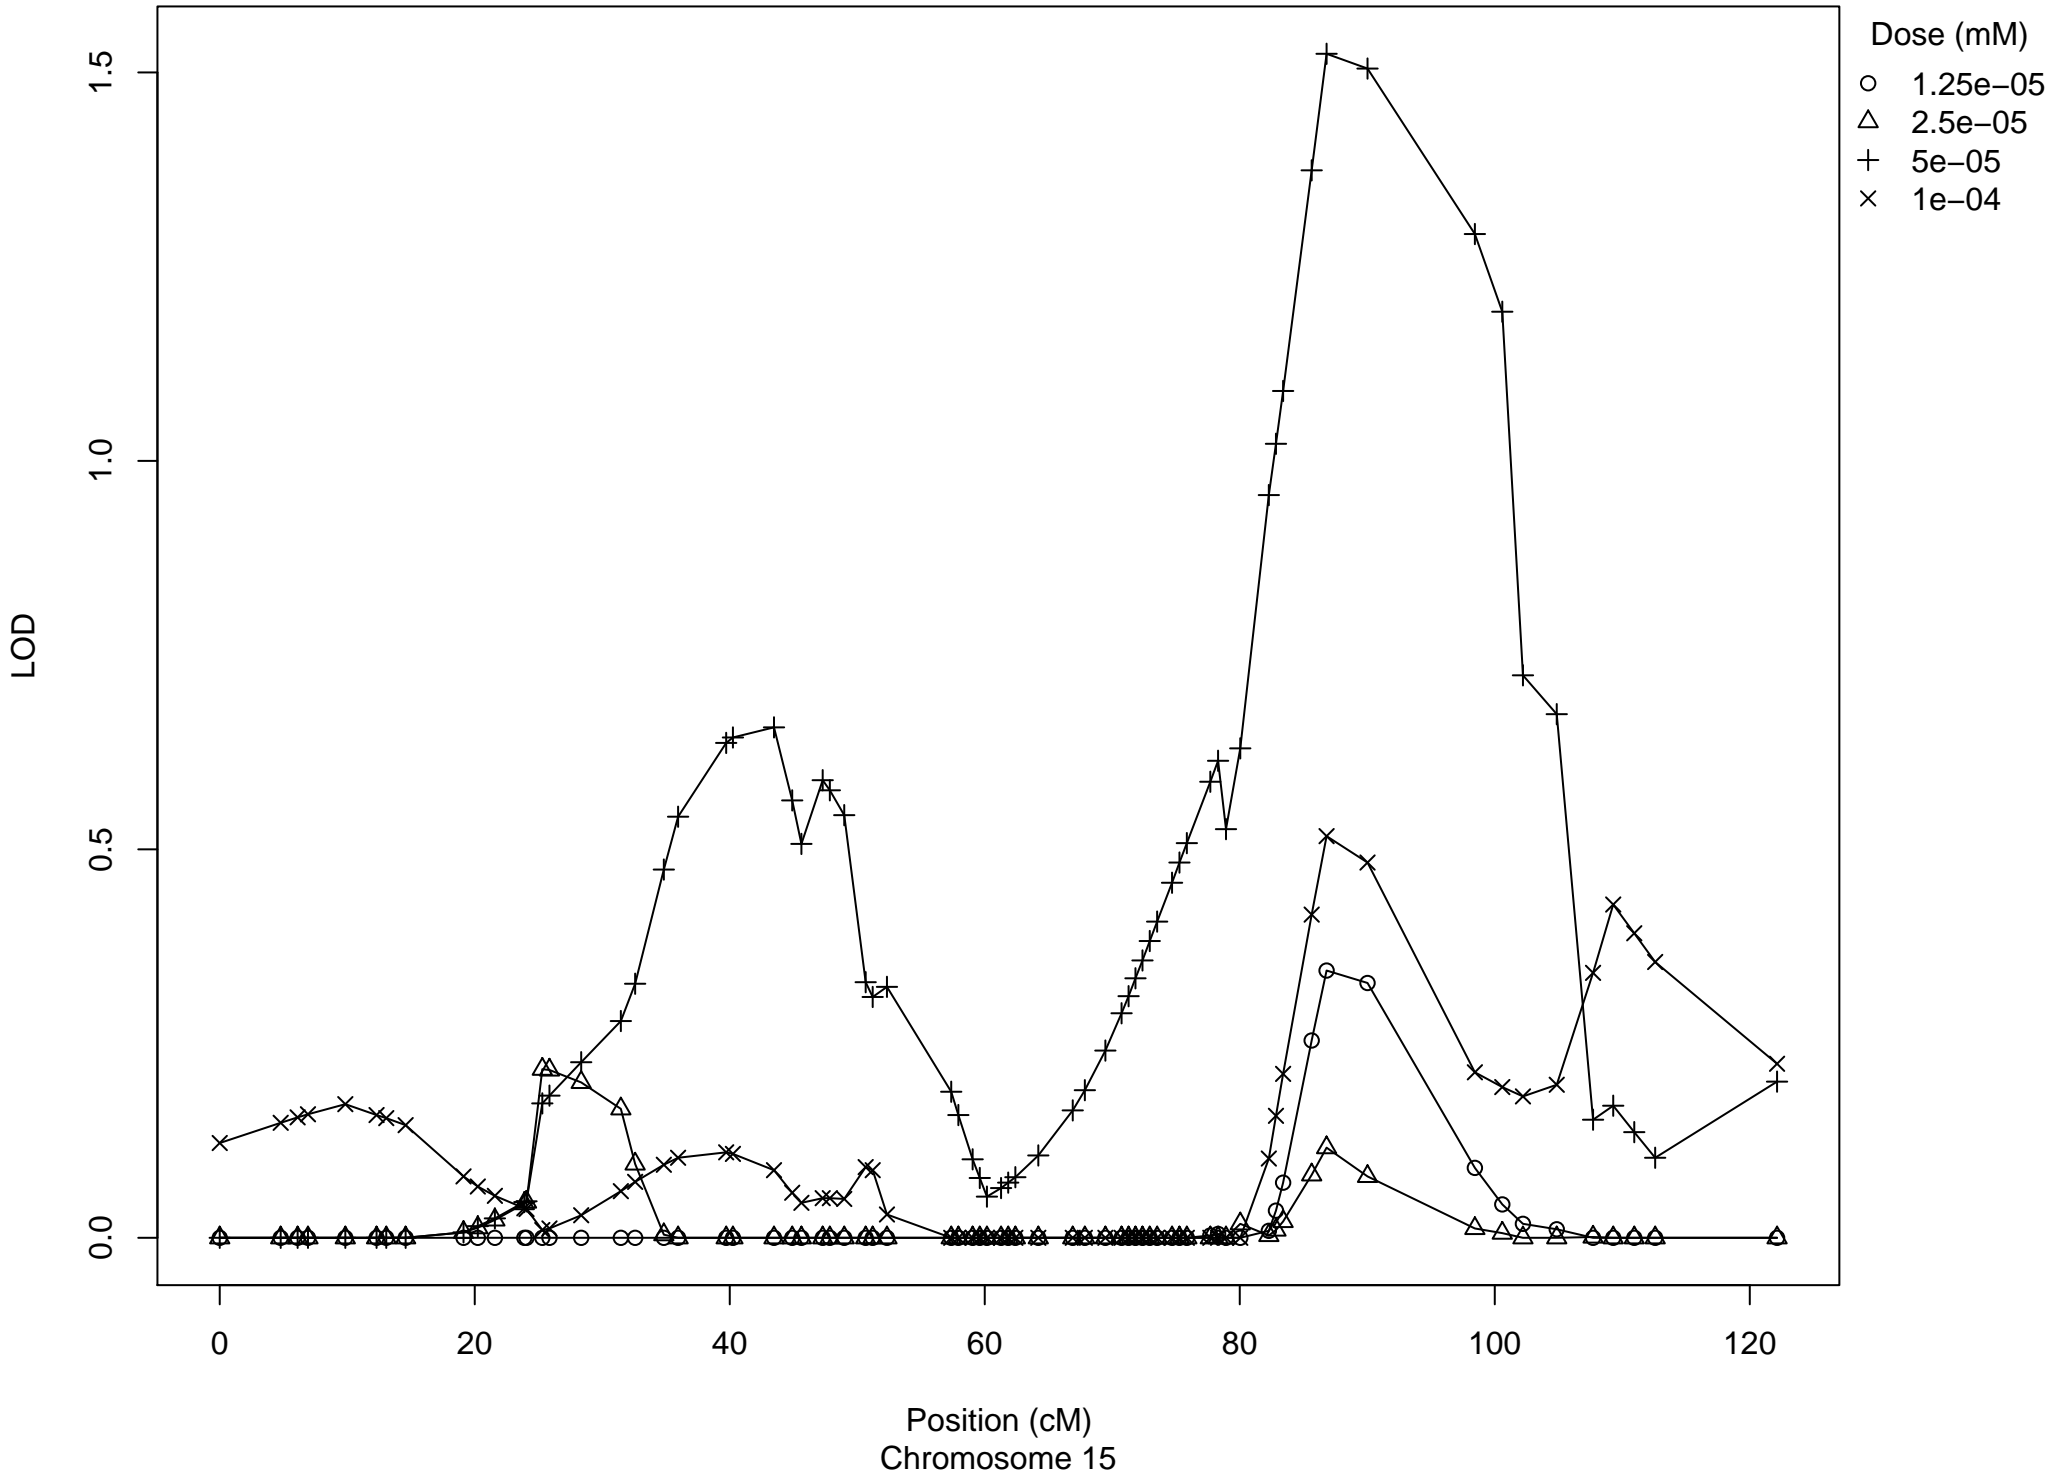

# Vincristine Sulfate Salt (Vinc)

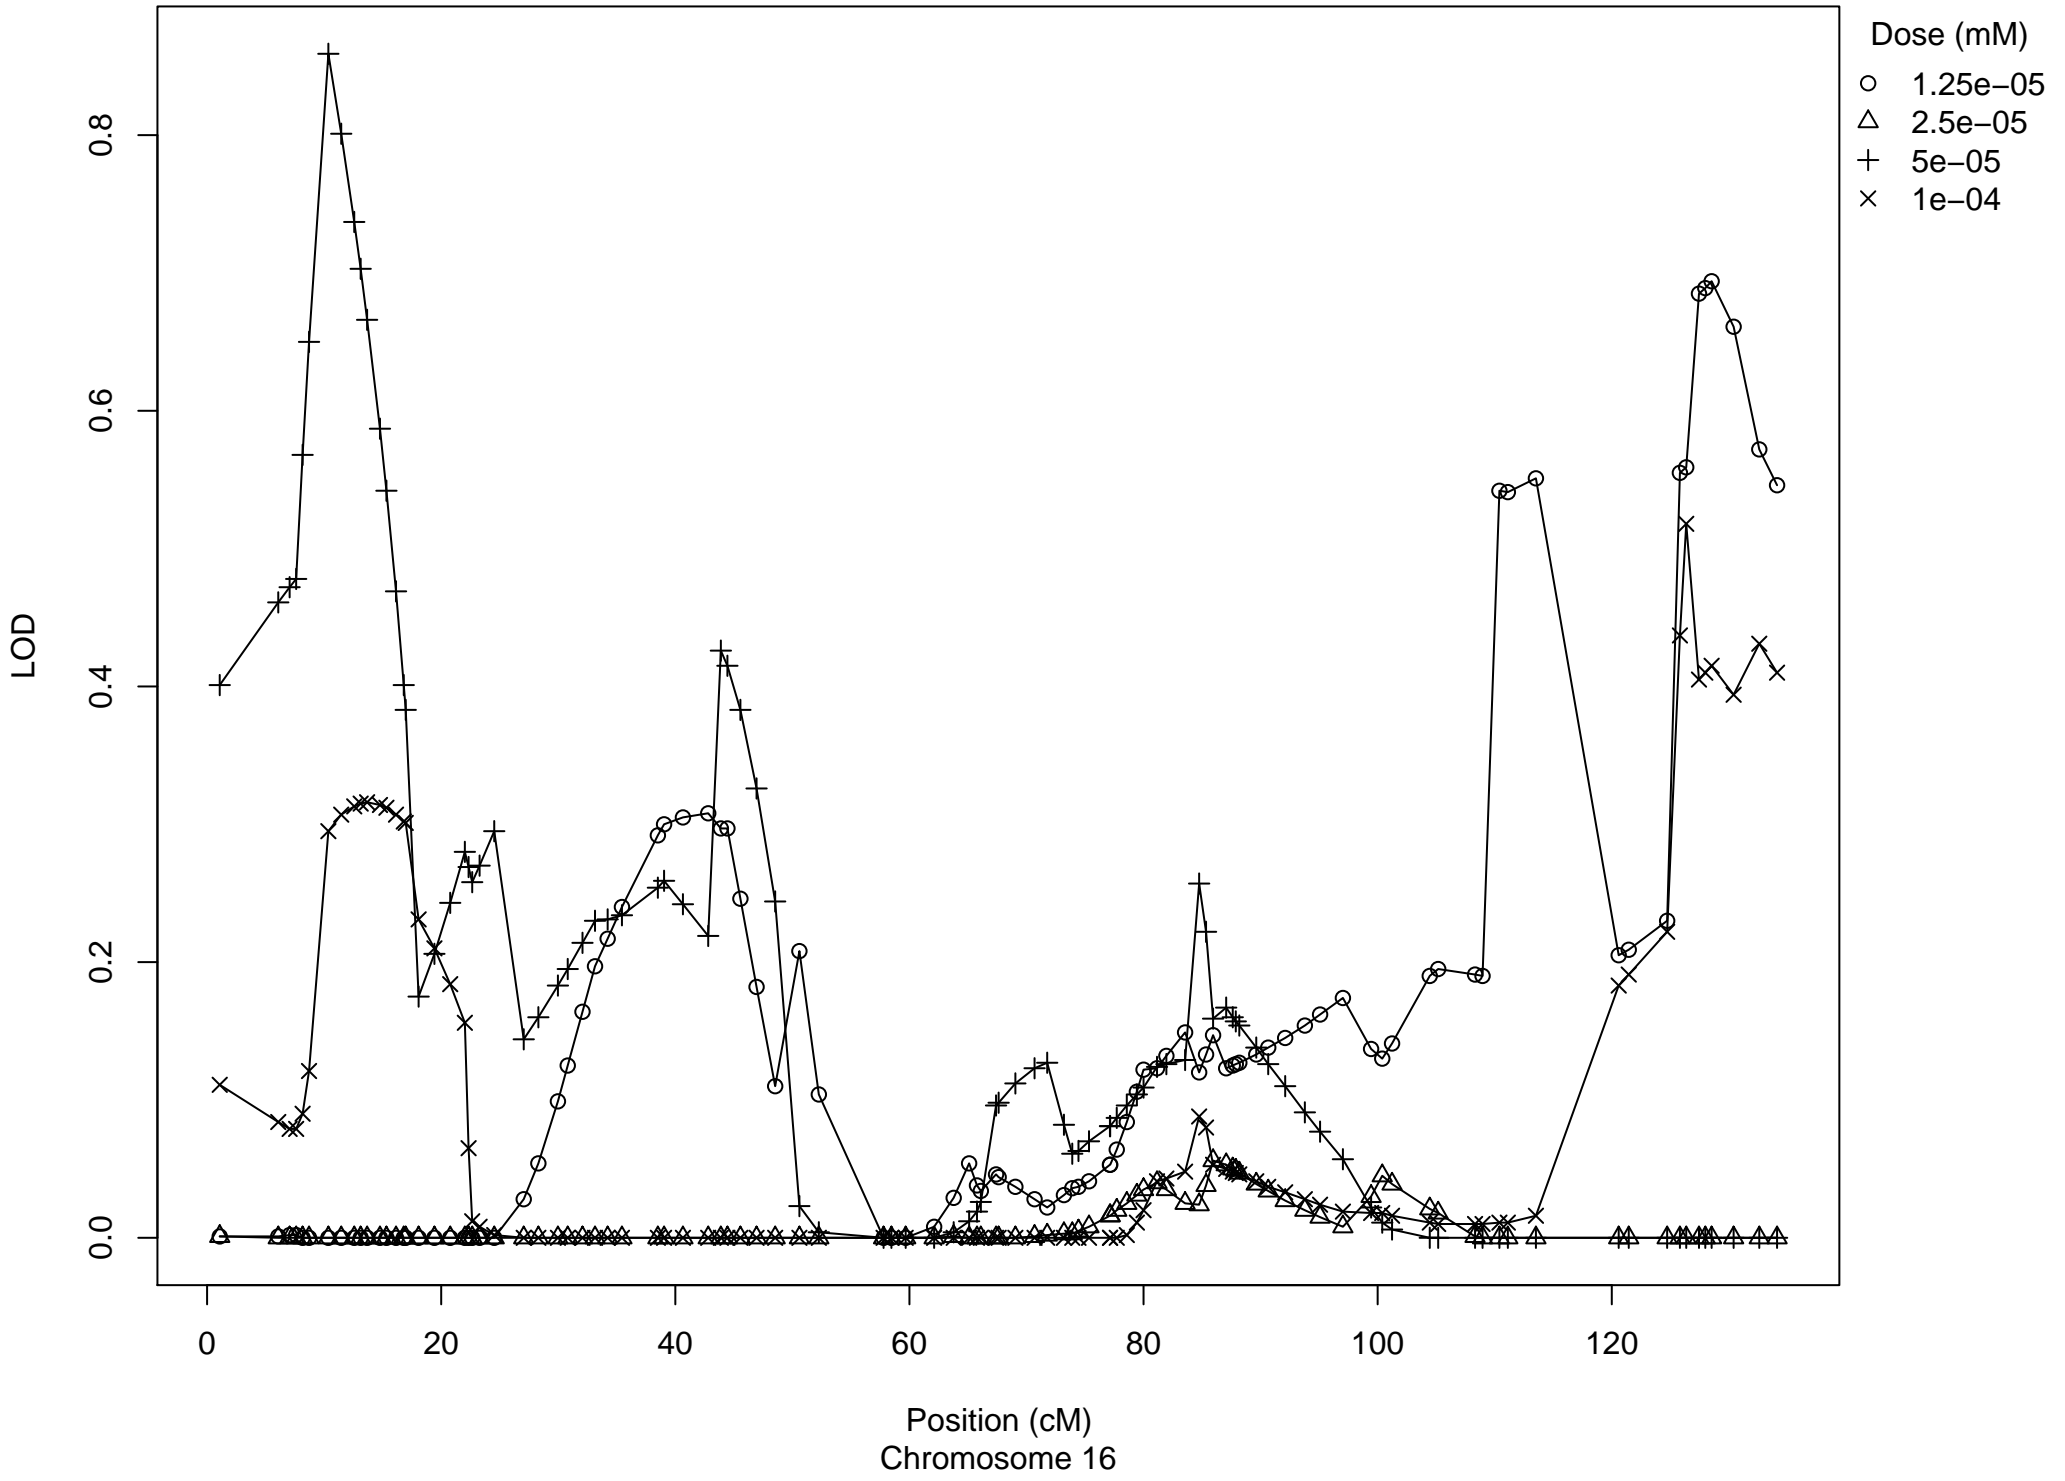

# Vincristine Sulfate Salt (Vinc)

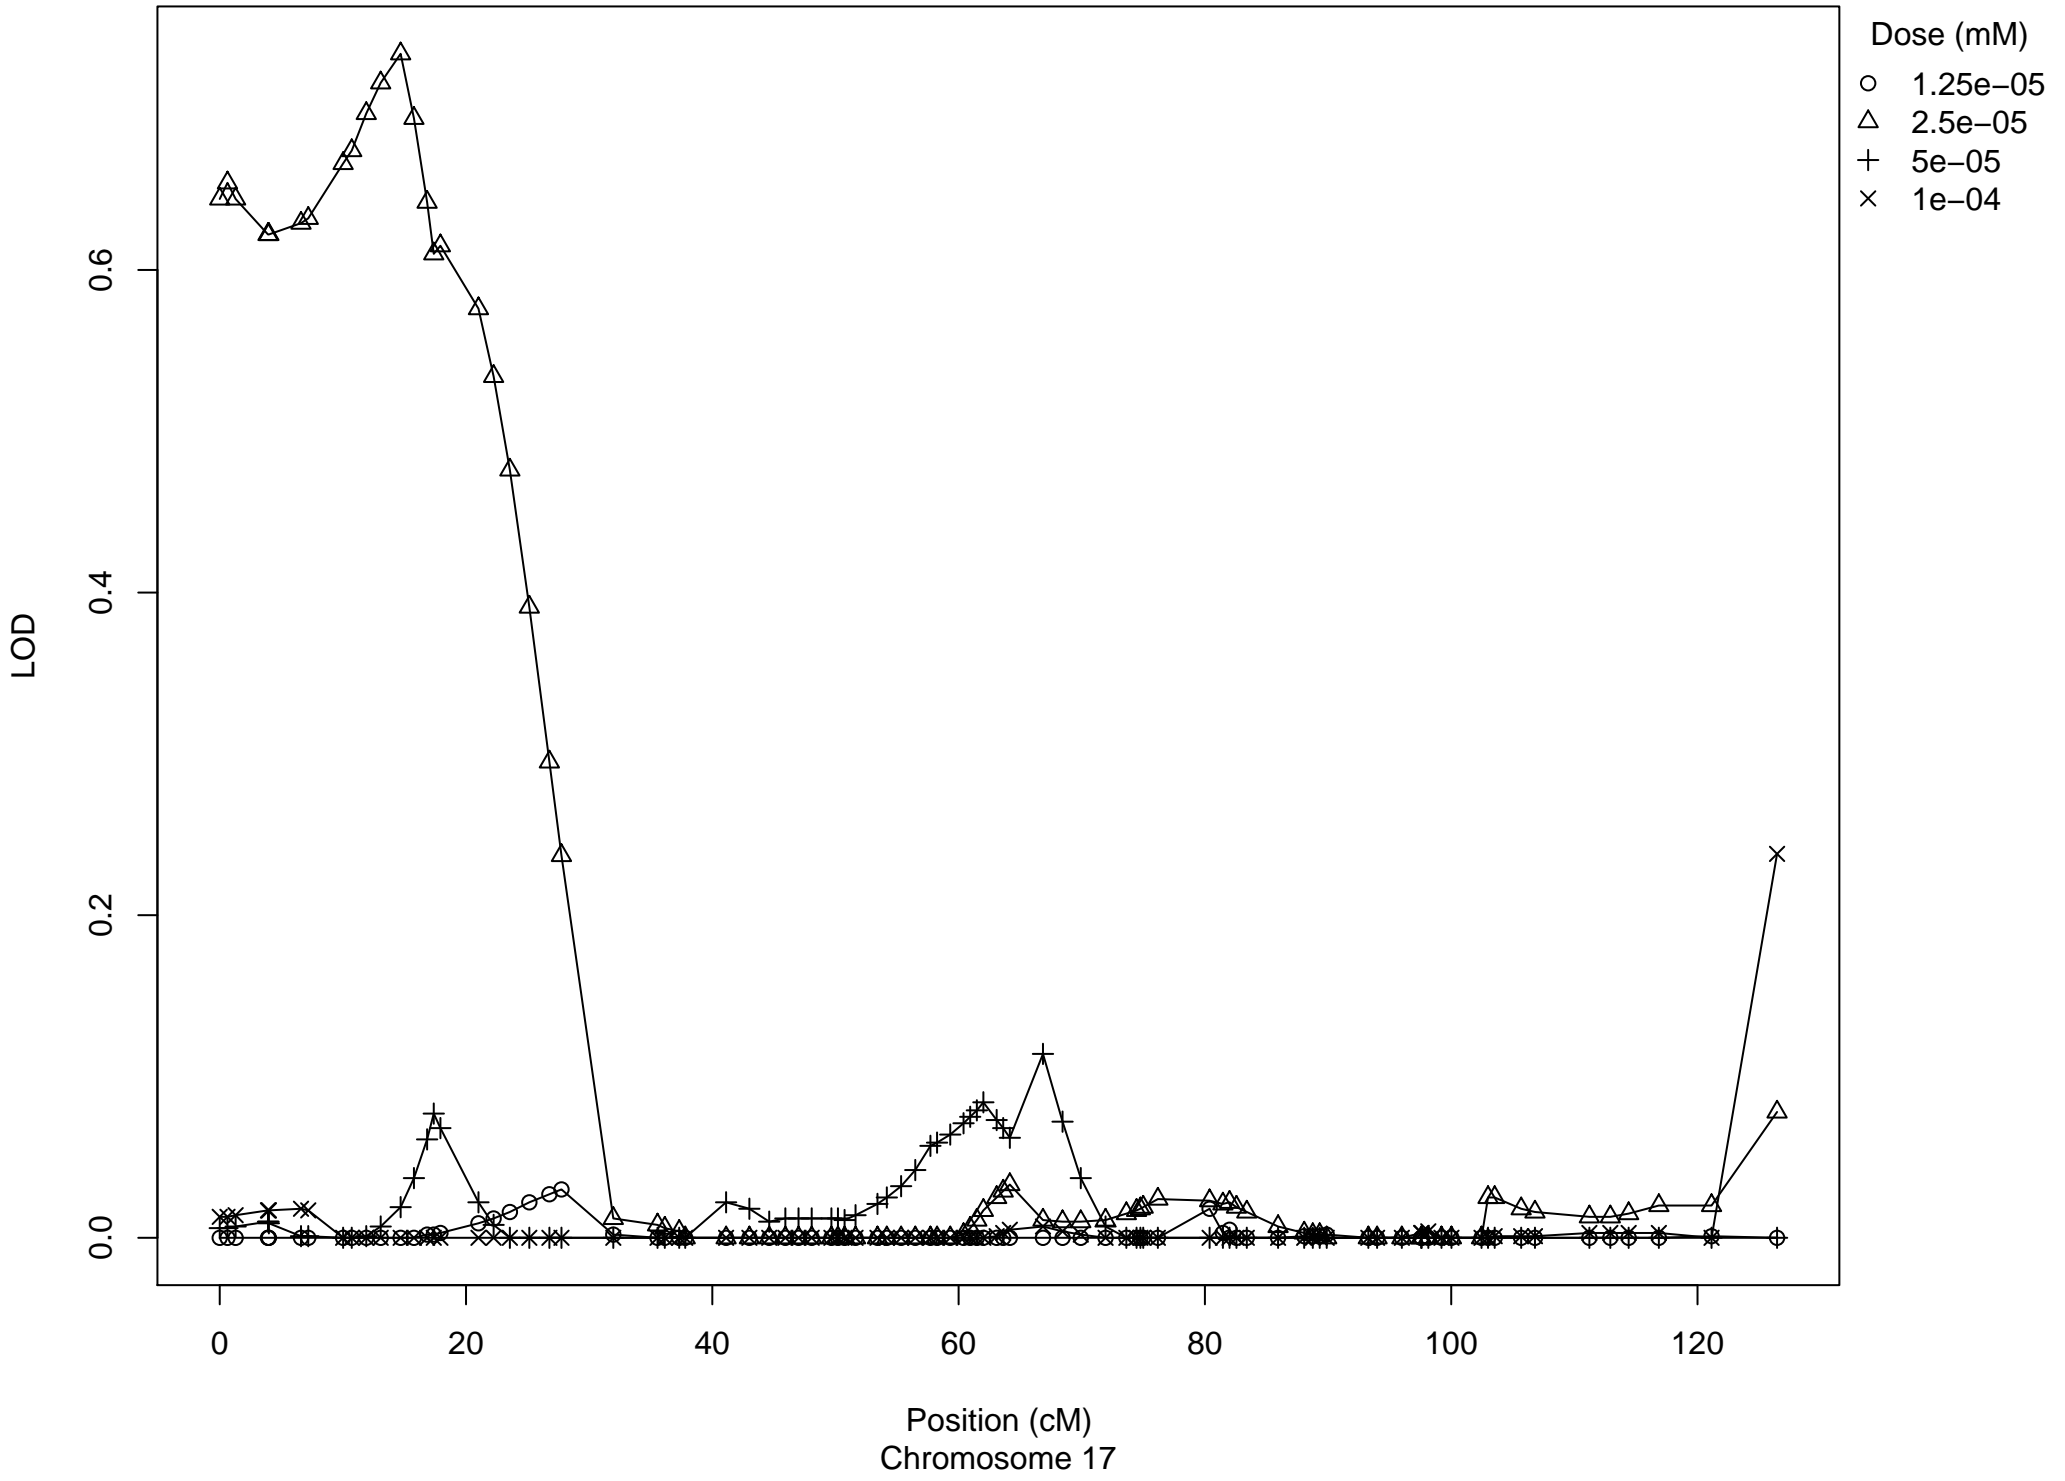

# Vincristine Sulfate Salt (Vinc)

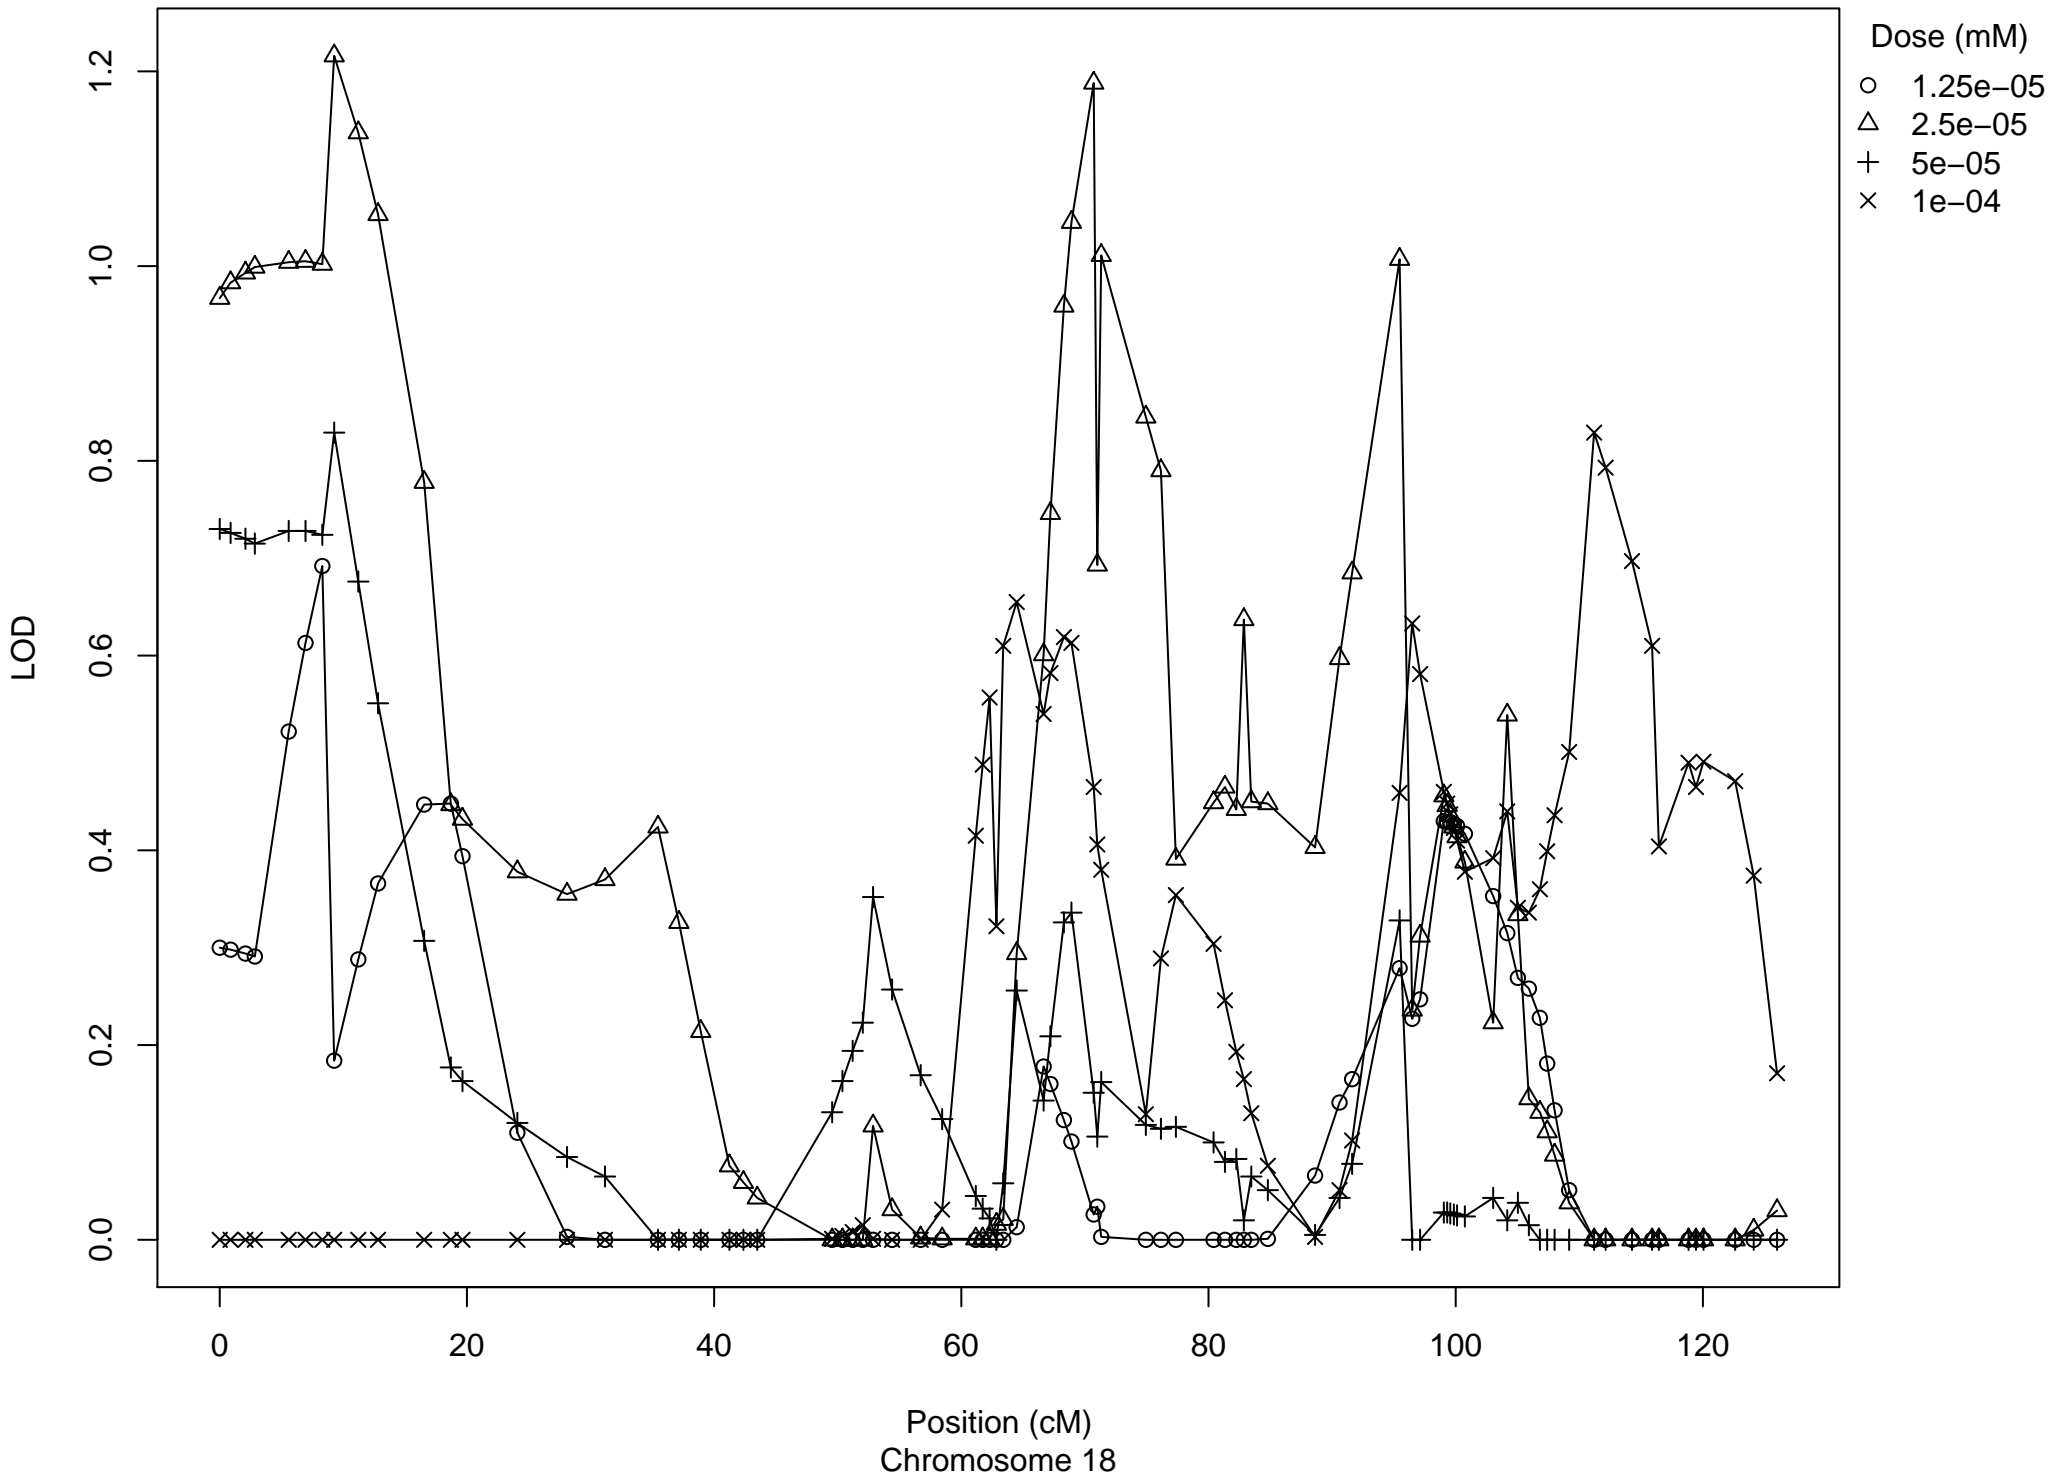

# Vincristine Sulfate Salt (Vinc)

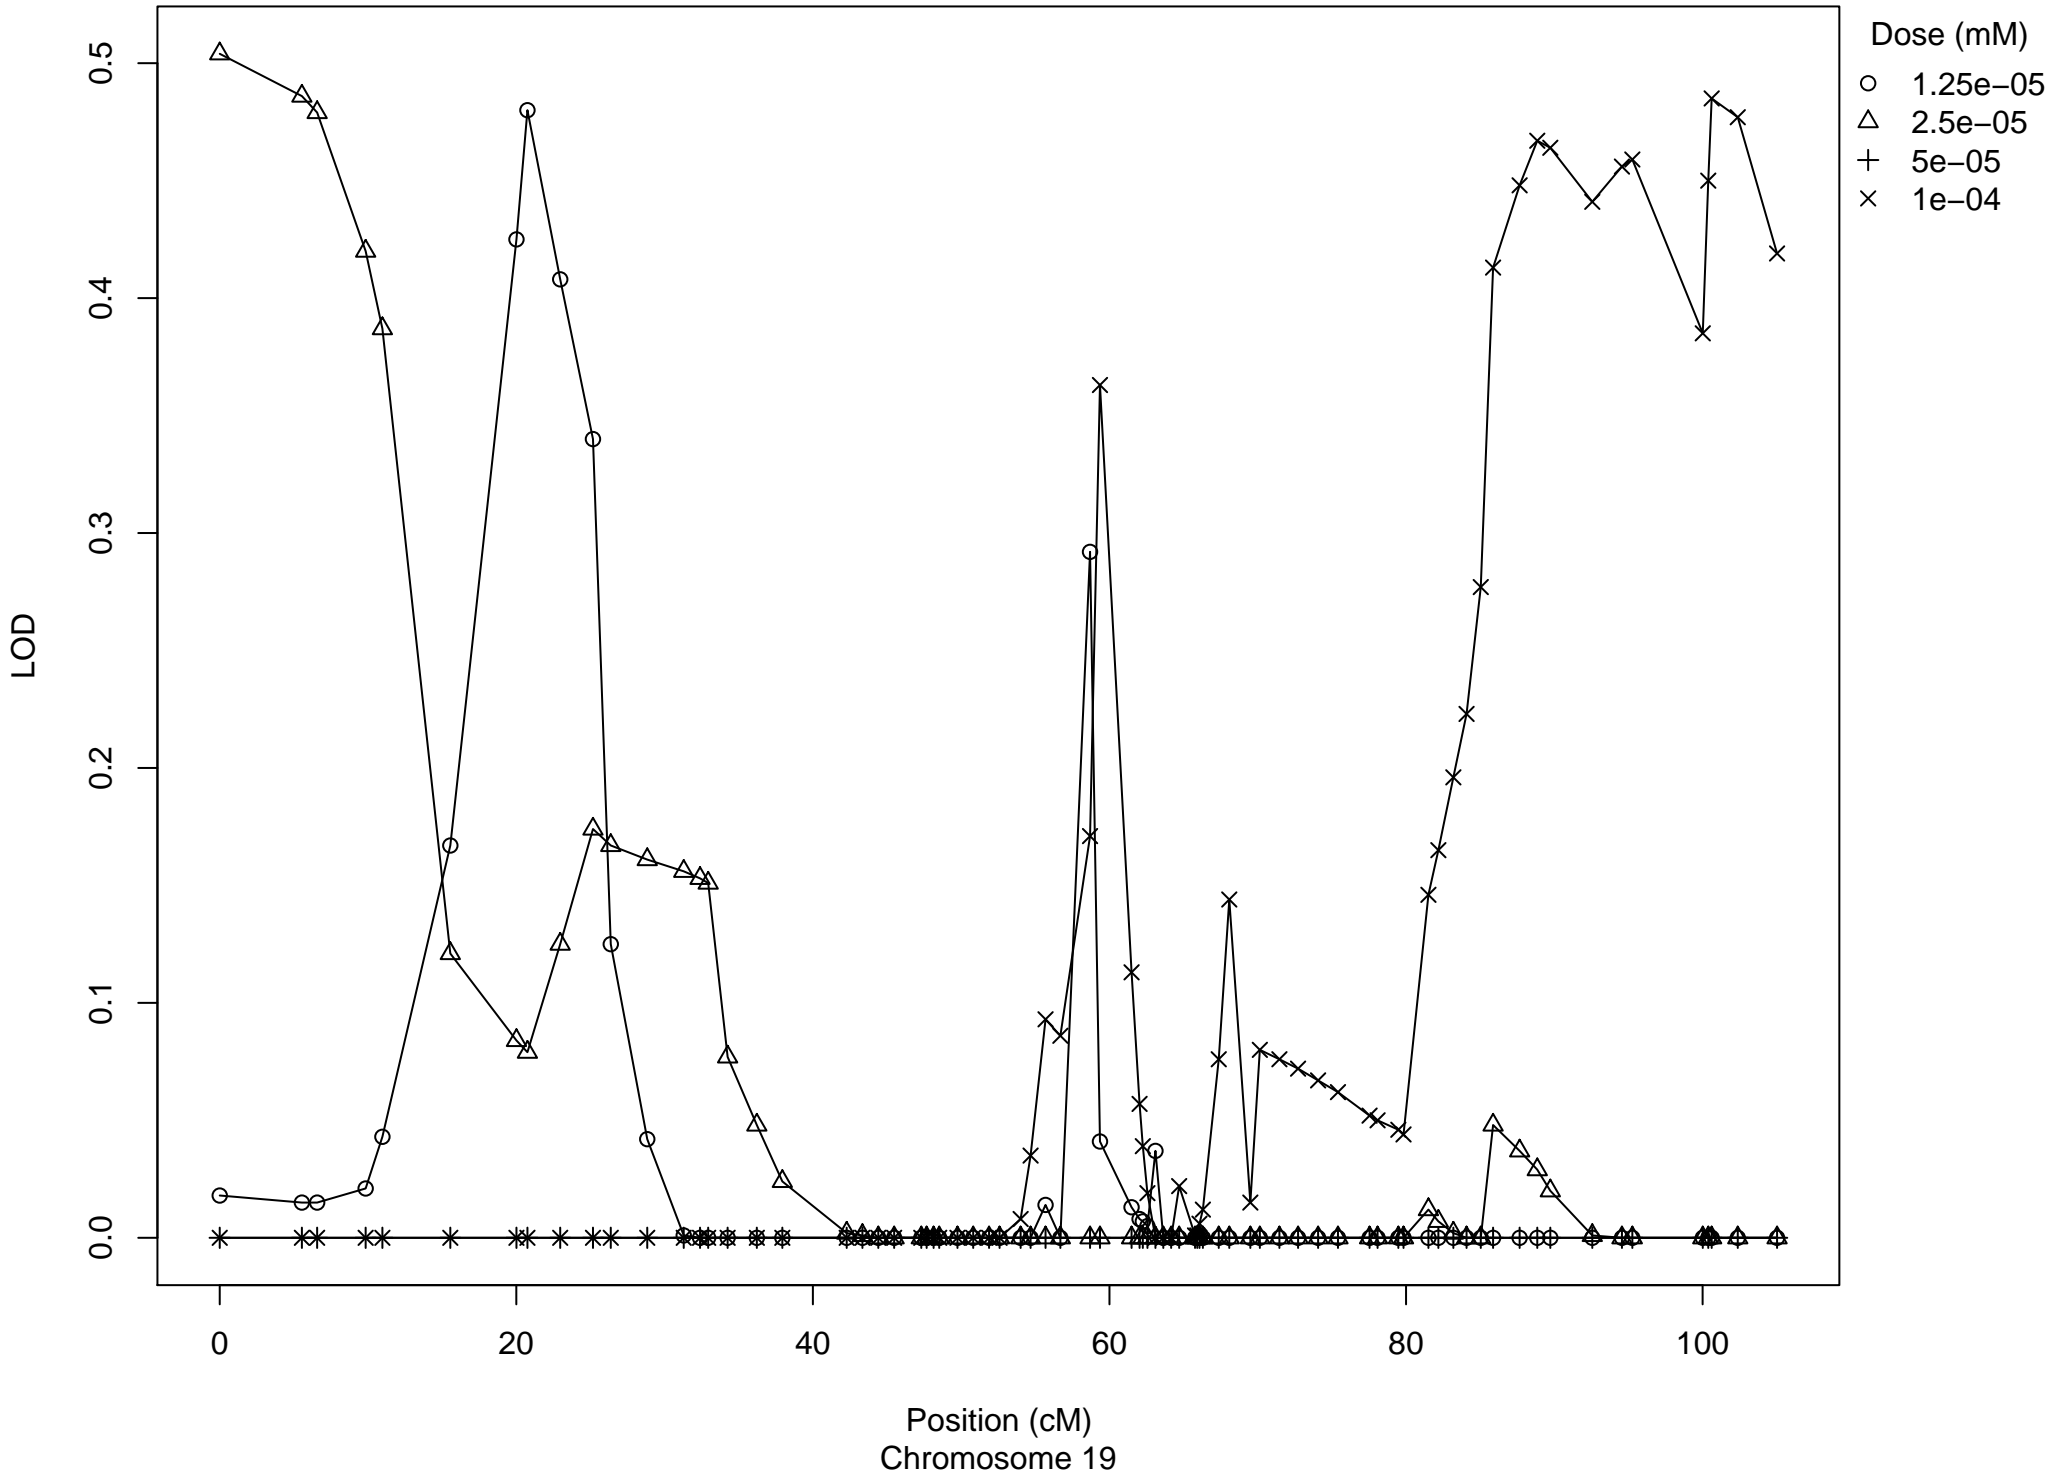

# Vincristine Sulfate Salt (Vinc)

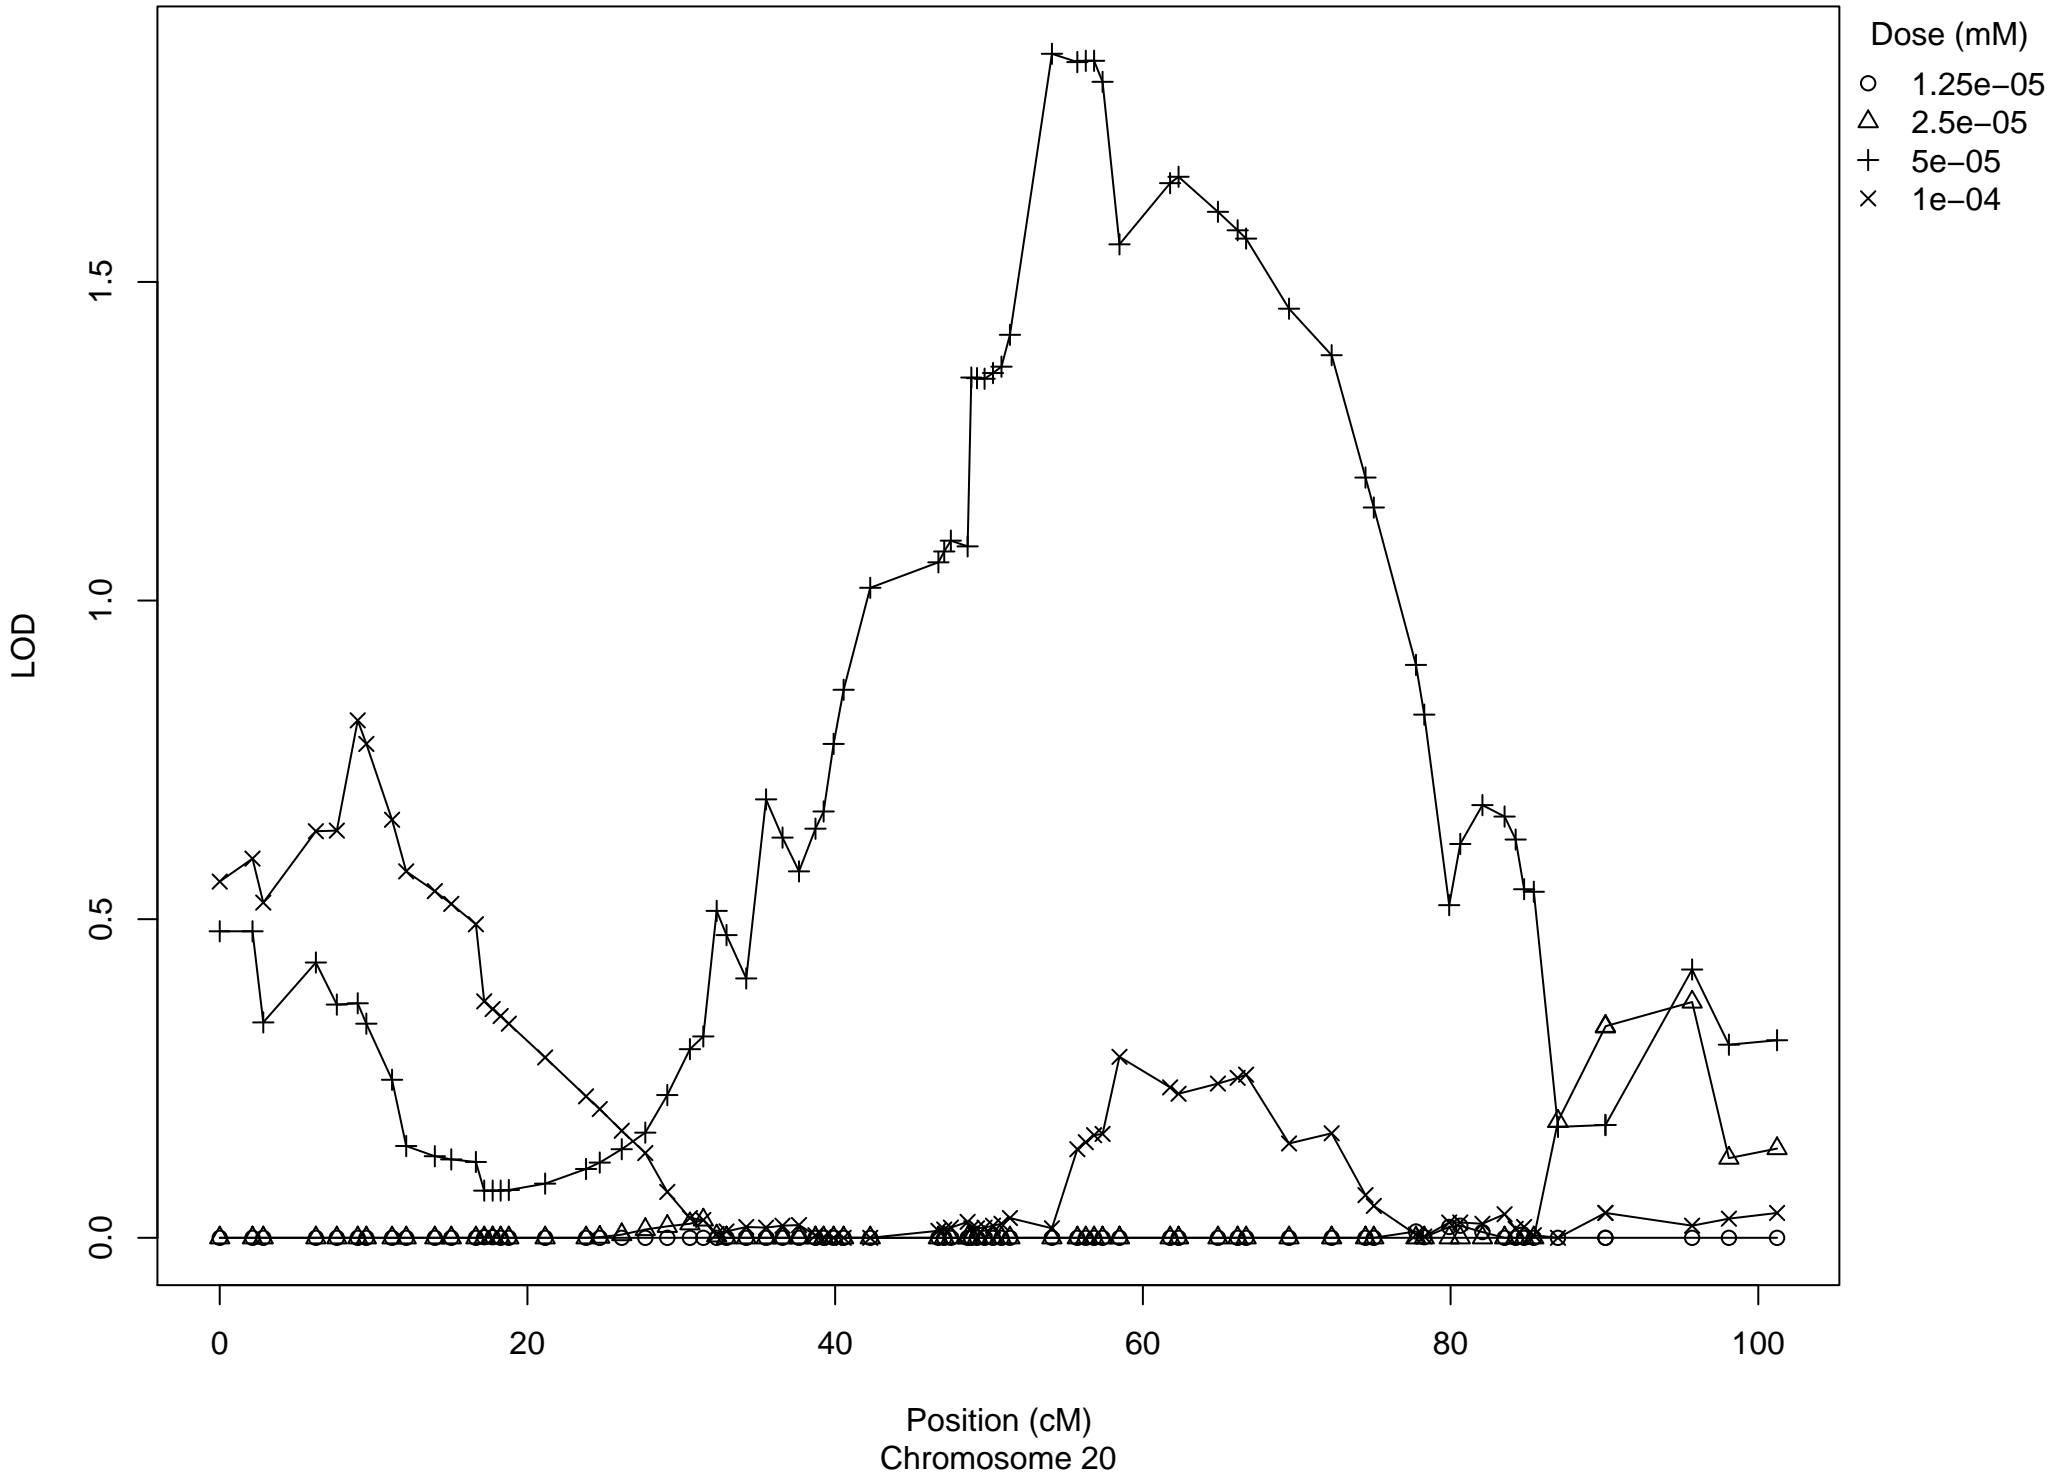

# Vincristine Sulfate Salt (Vinc)

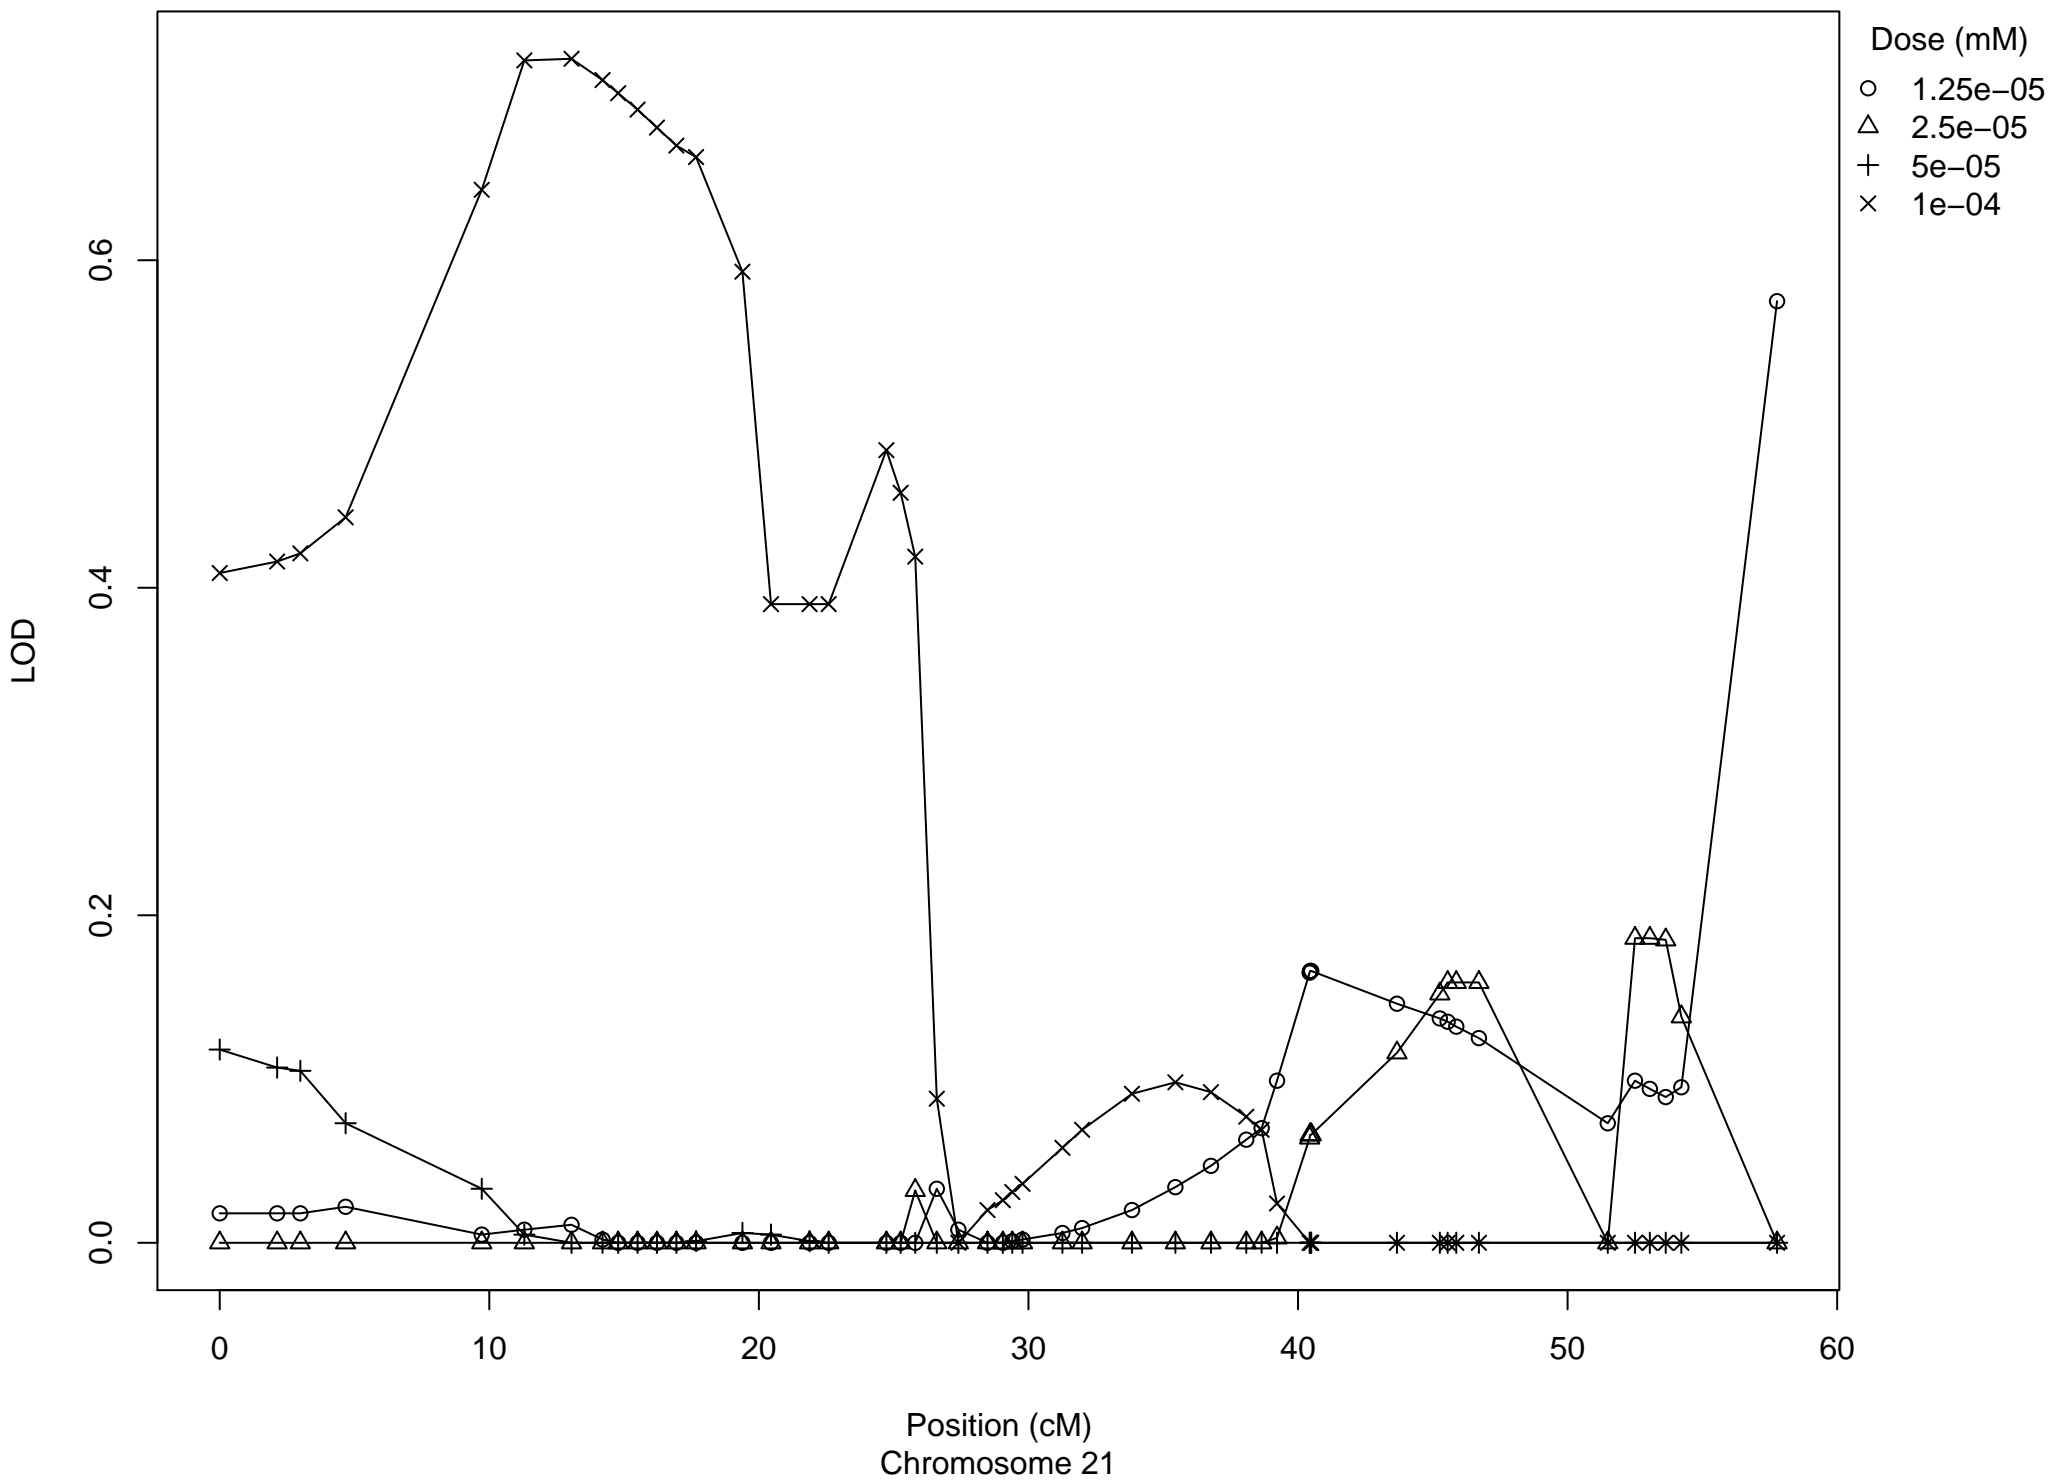

# Vincristine Sulfate Salt (Vinc)

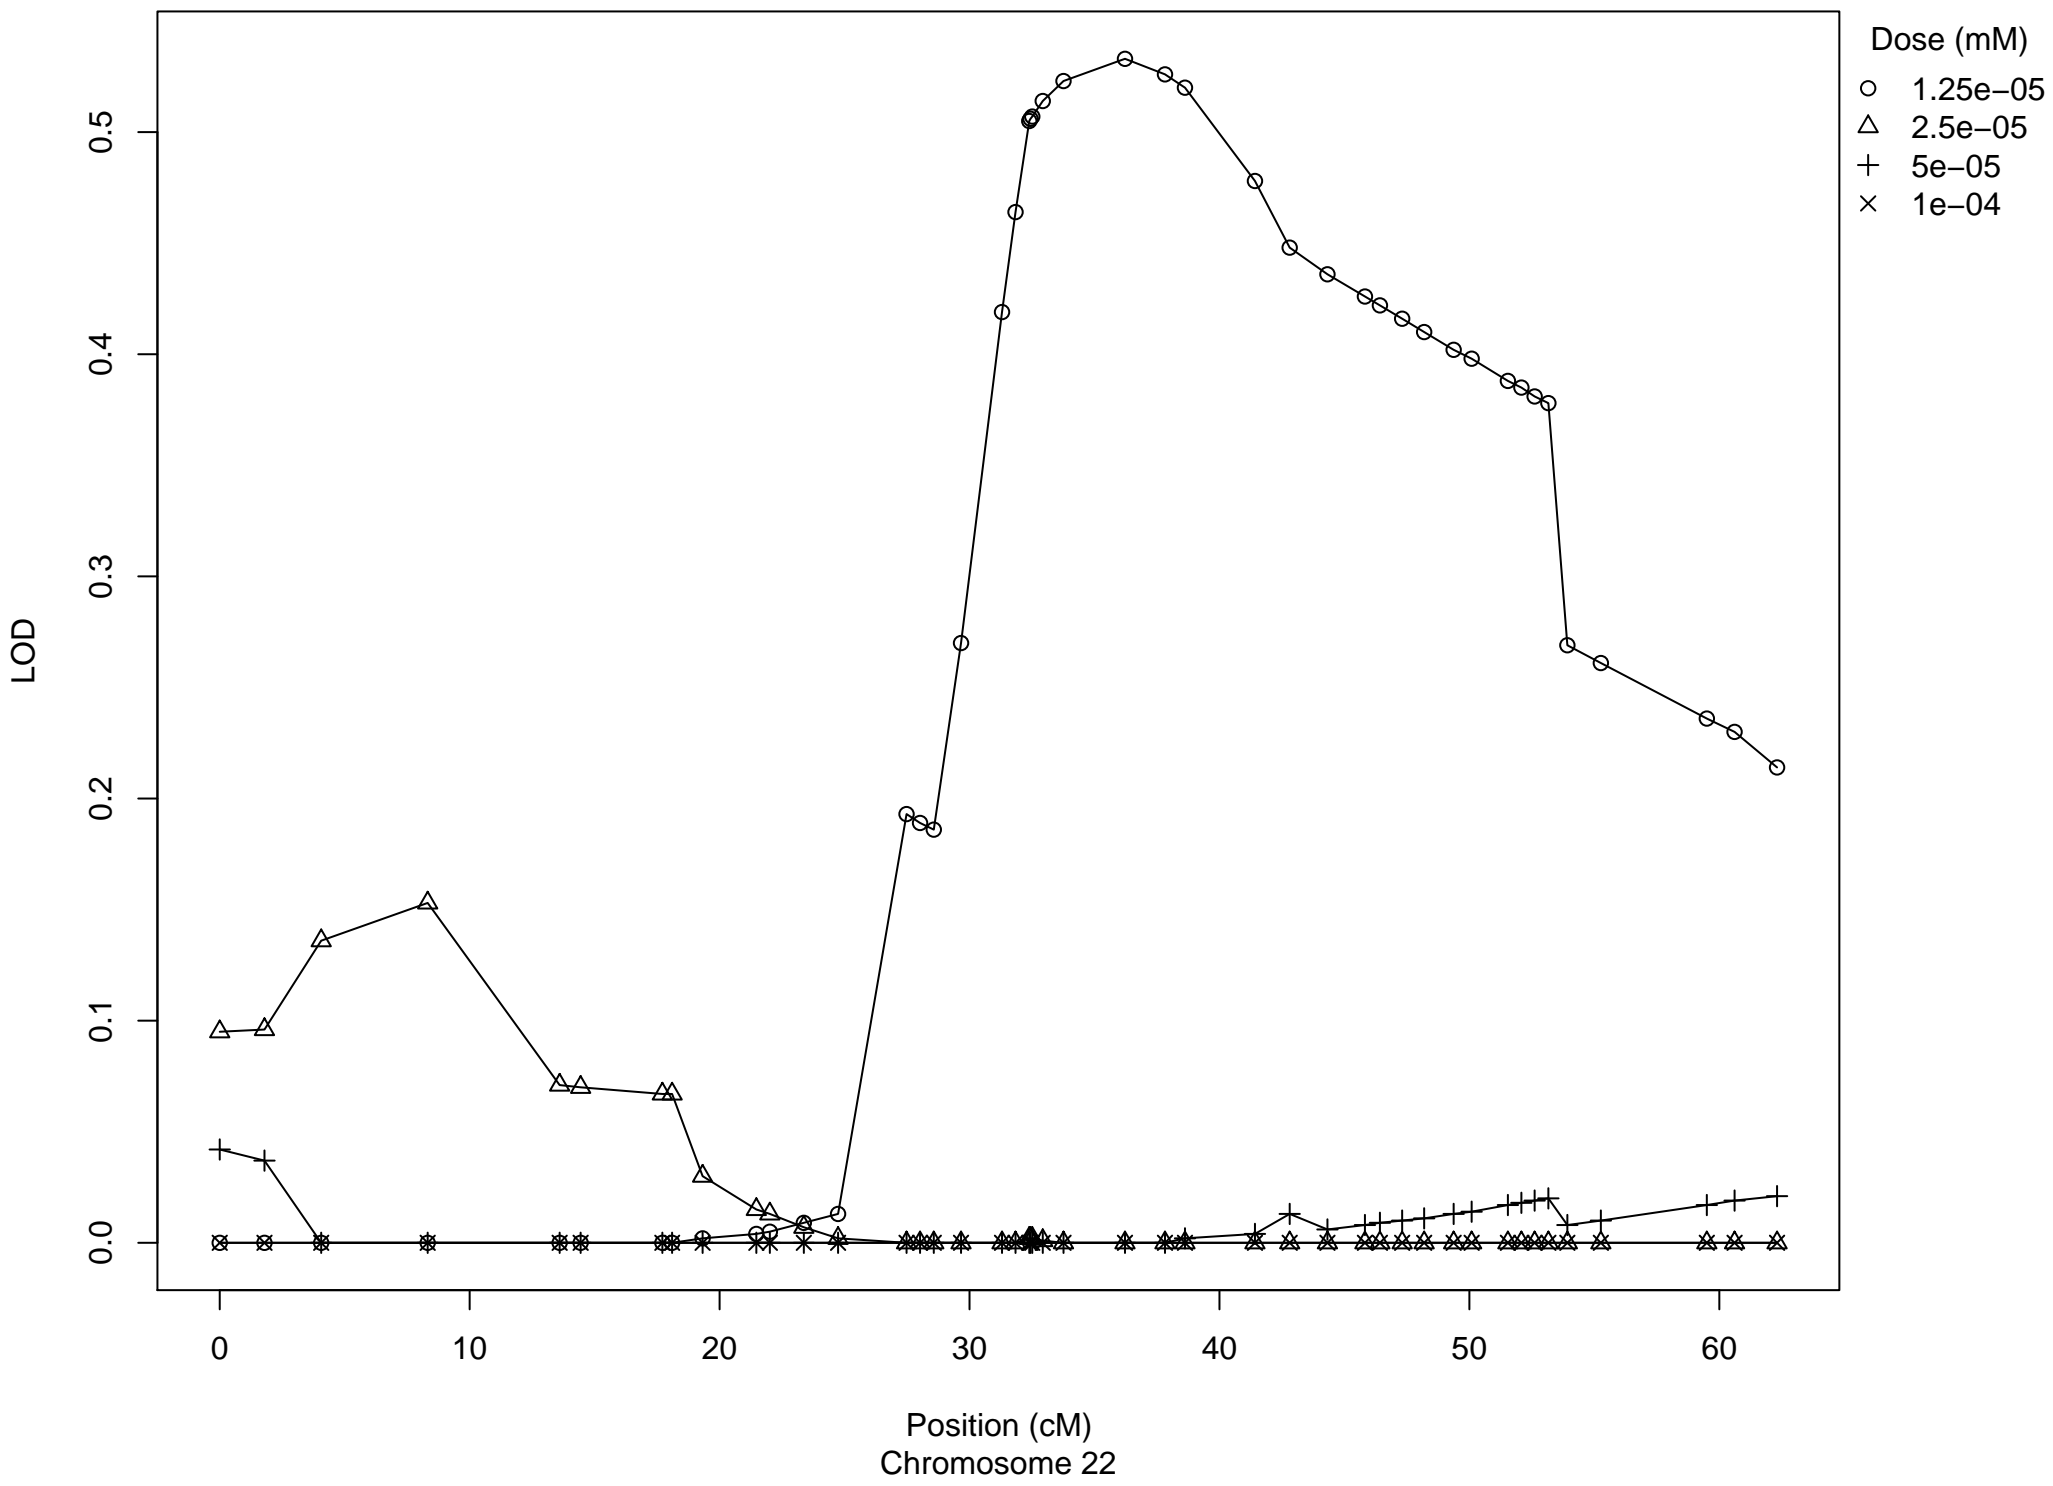



# Vinorelbine ditartrate salt hydrate (Vino)

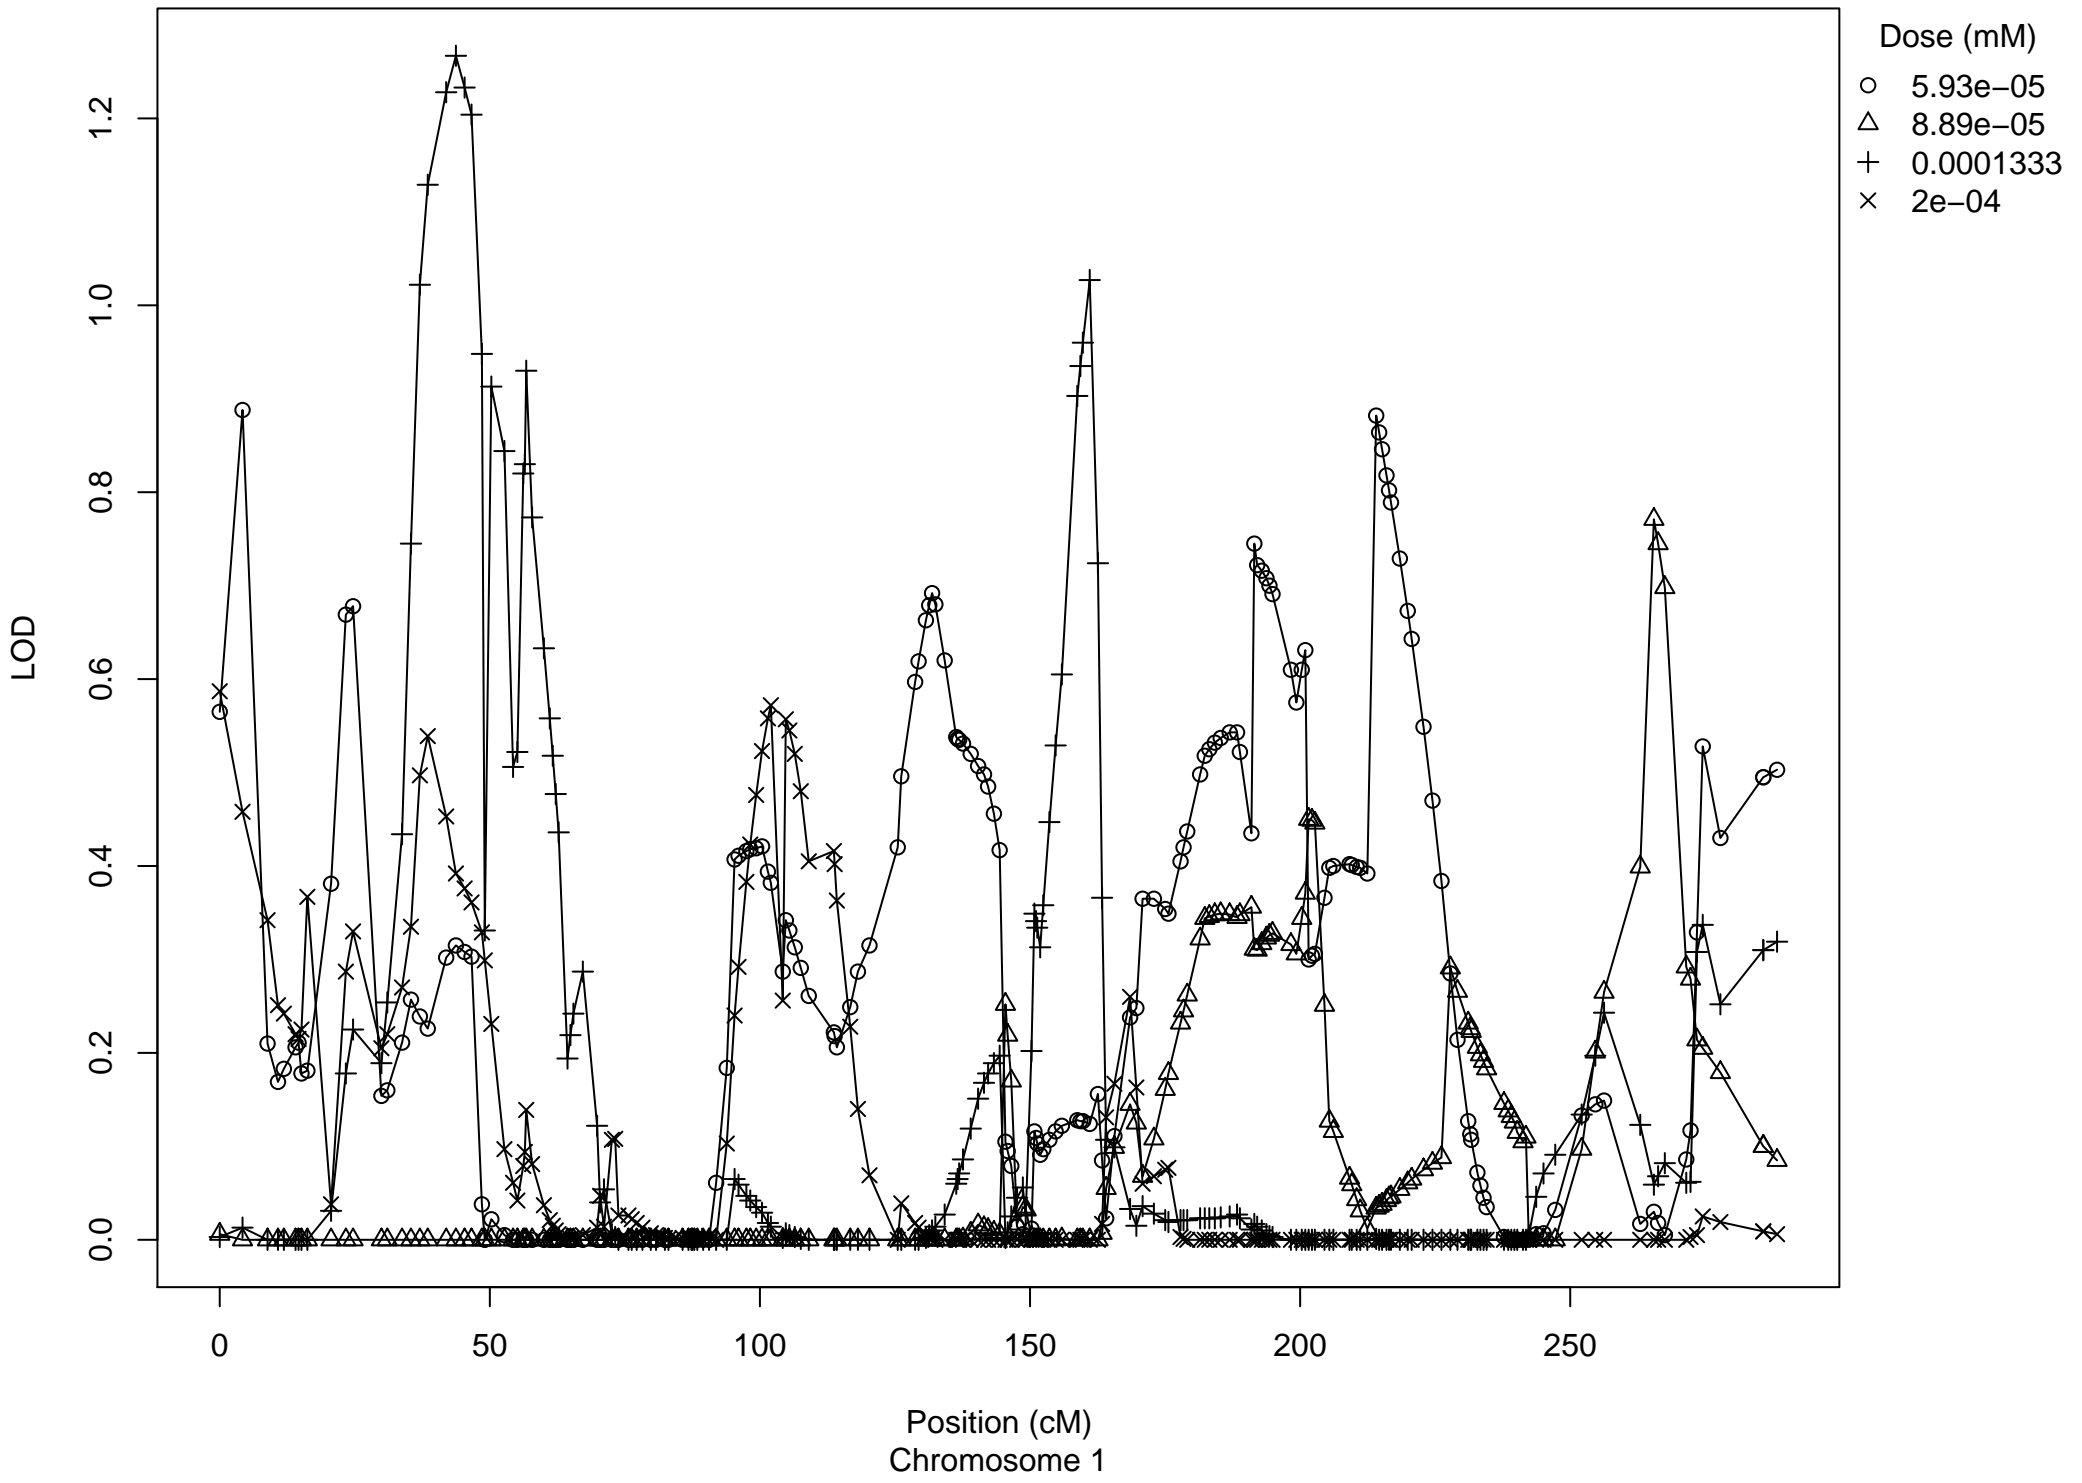

# Vinorelbine ditartrate salt hydrate (Vino)

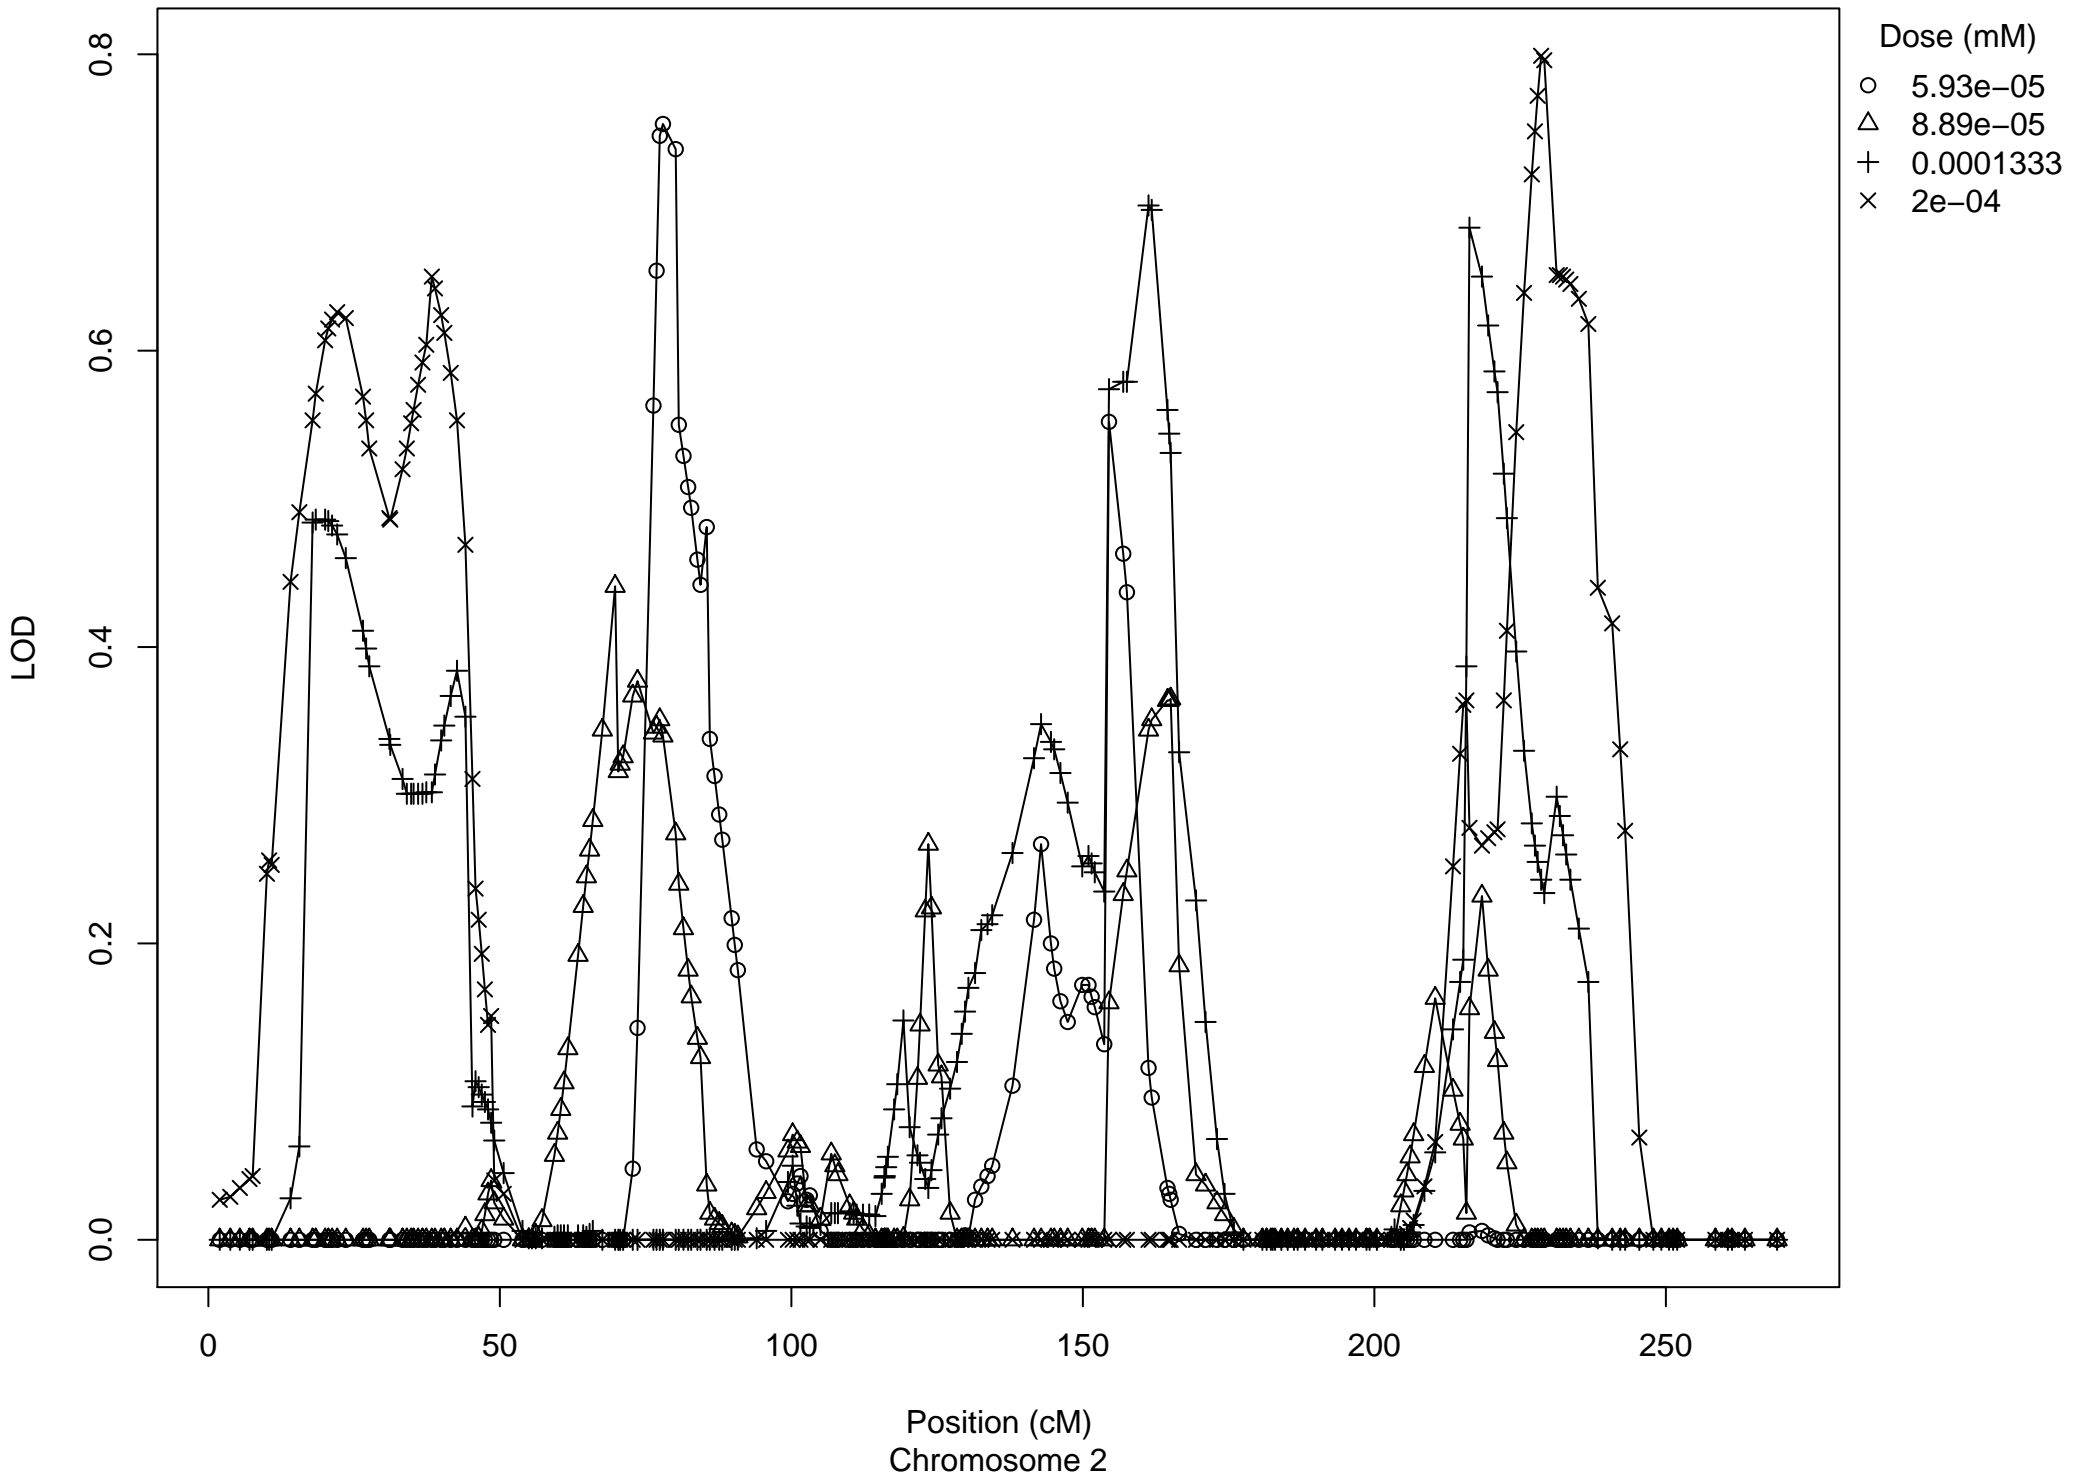

# Vinorelbine ditartrate salt hydrate (Vino)

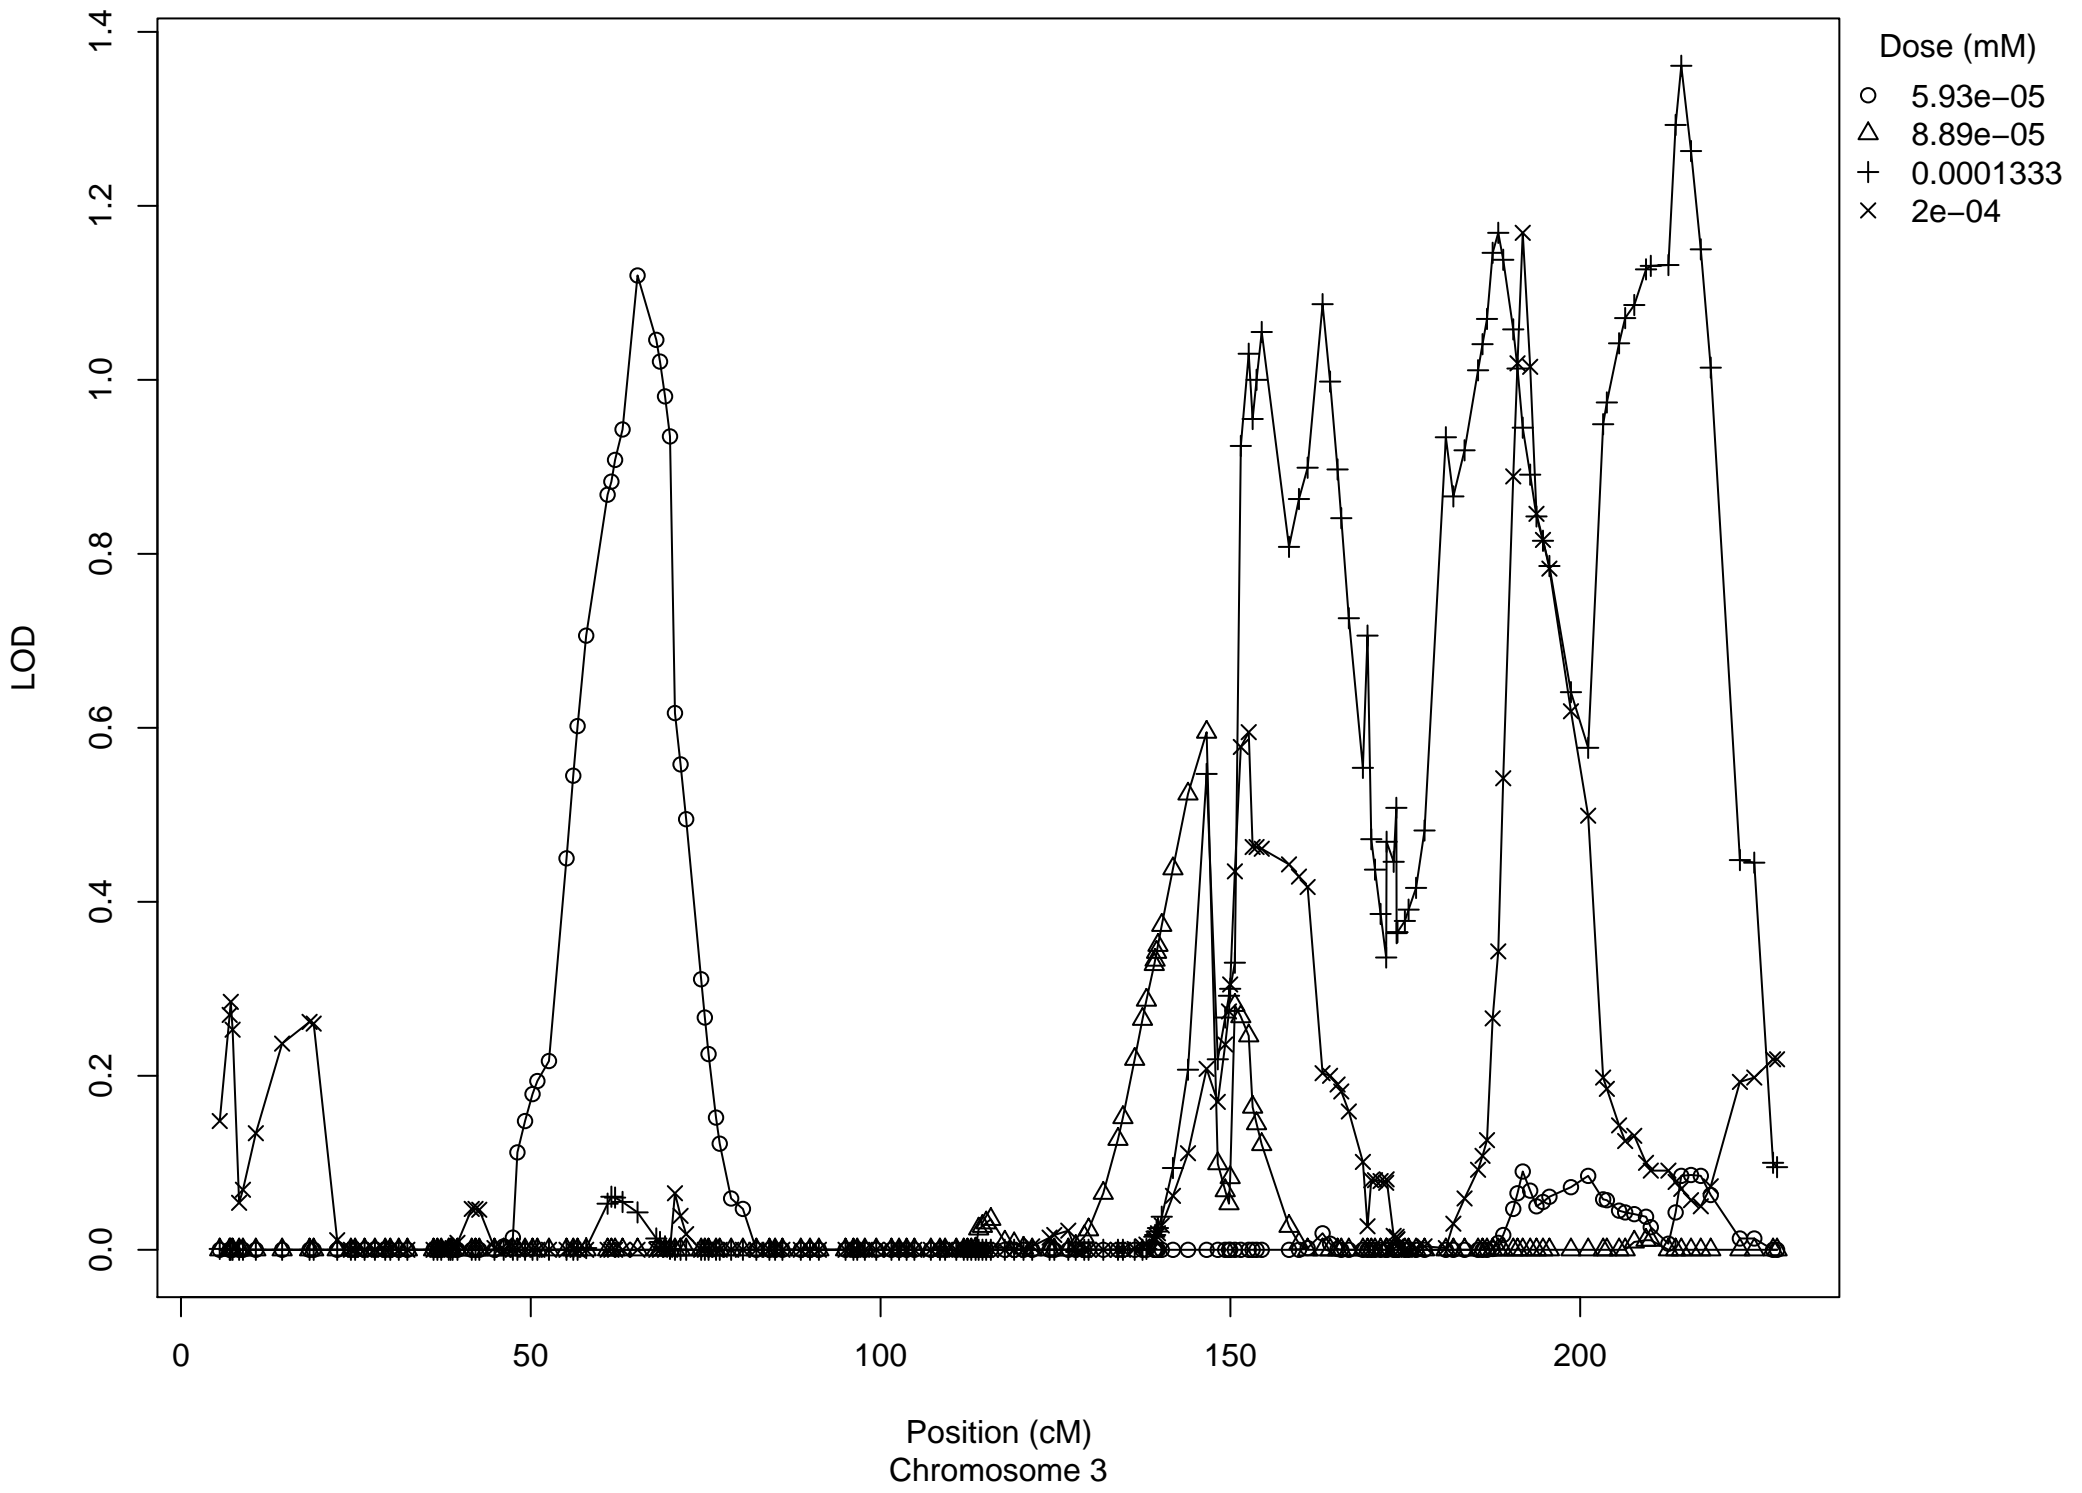

# Vinorelbine ditartrate salt hydrate (Vino)

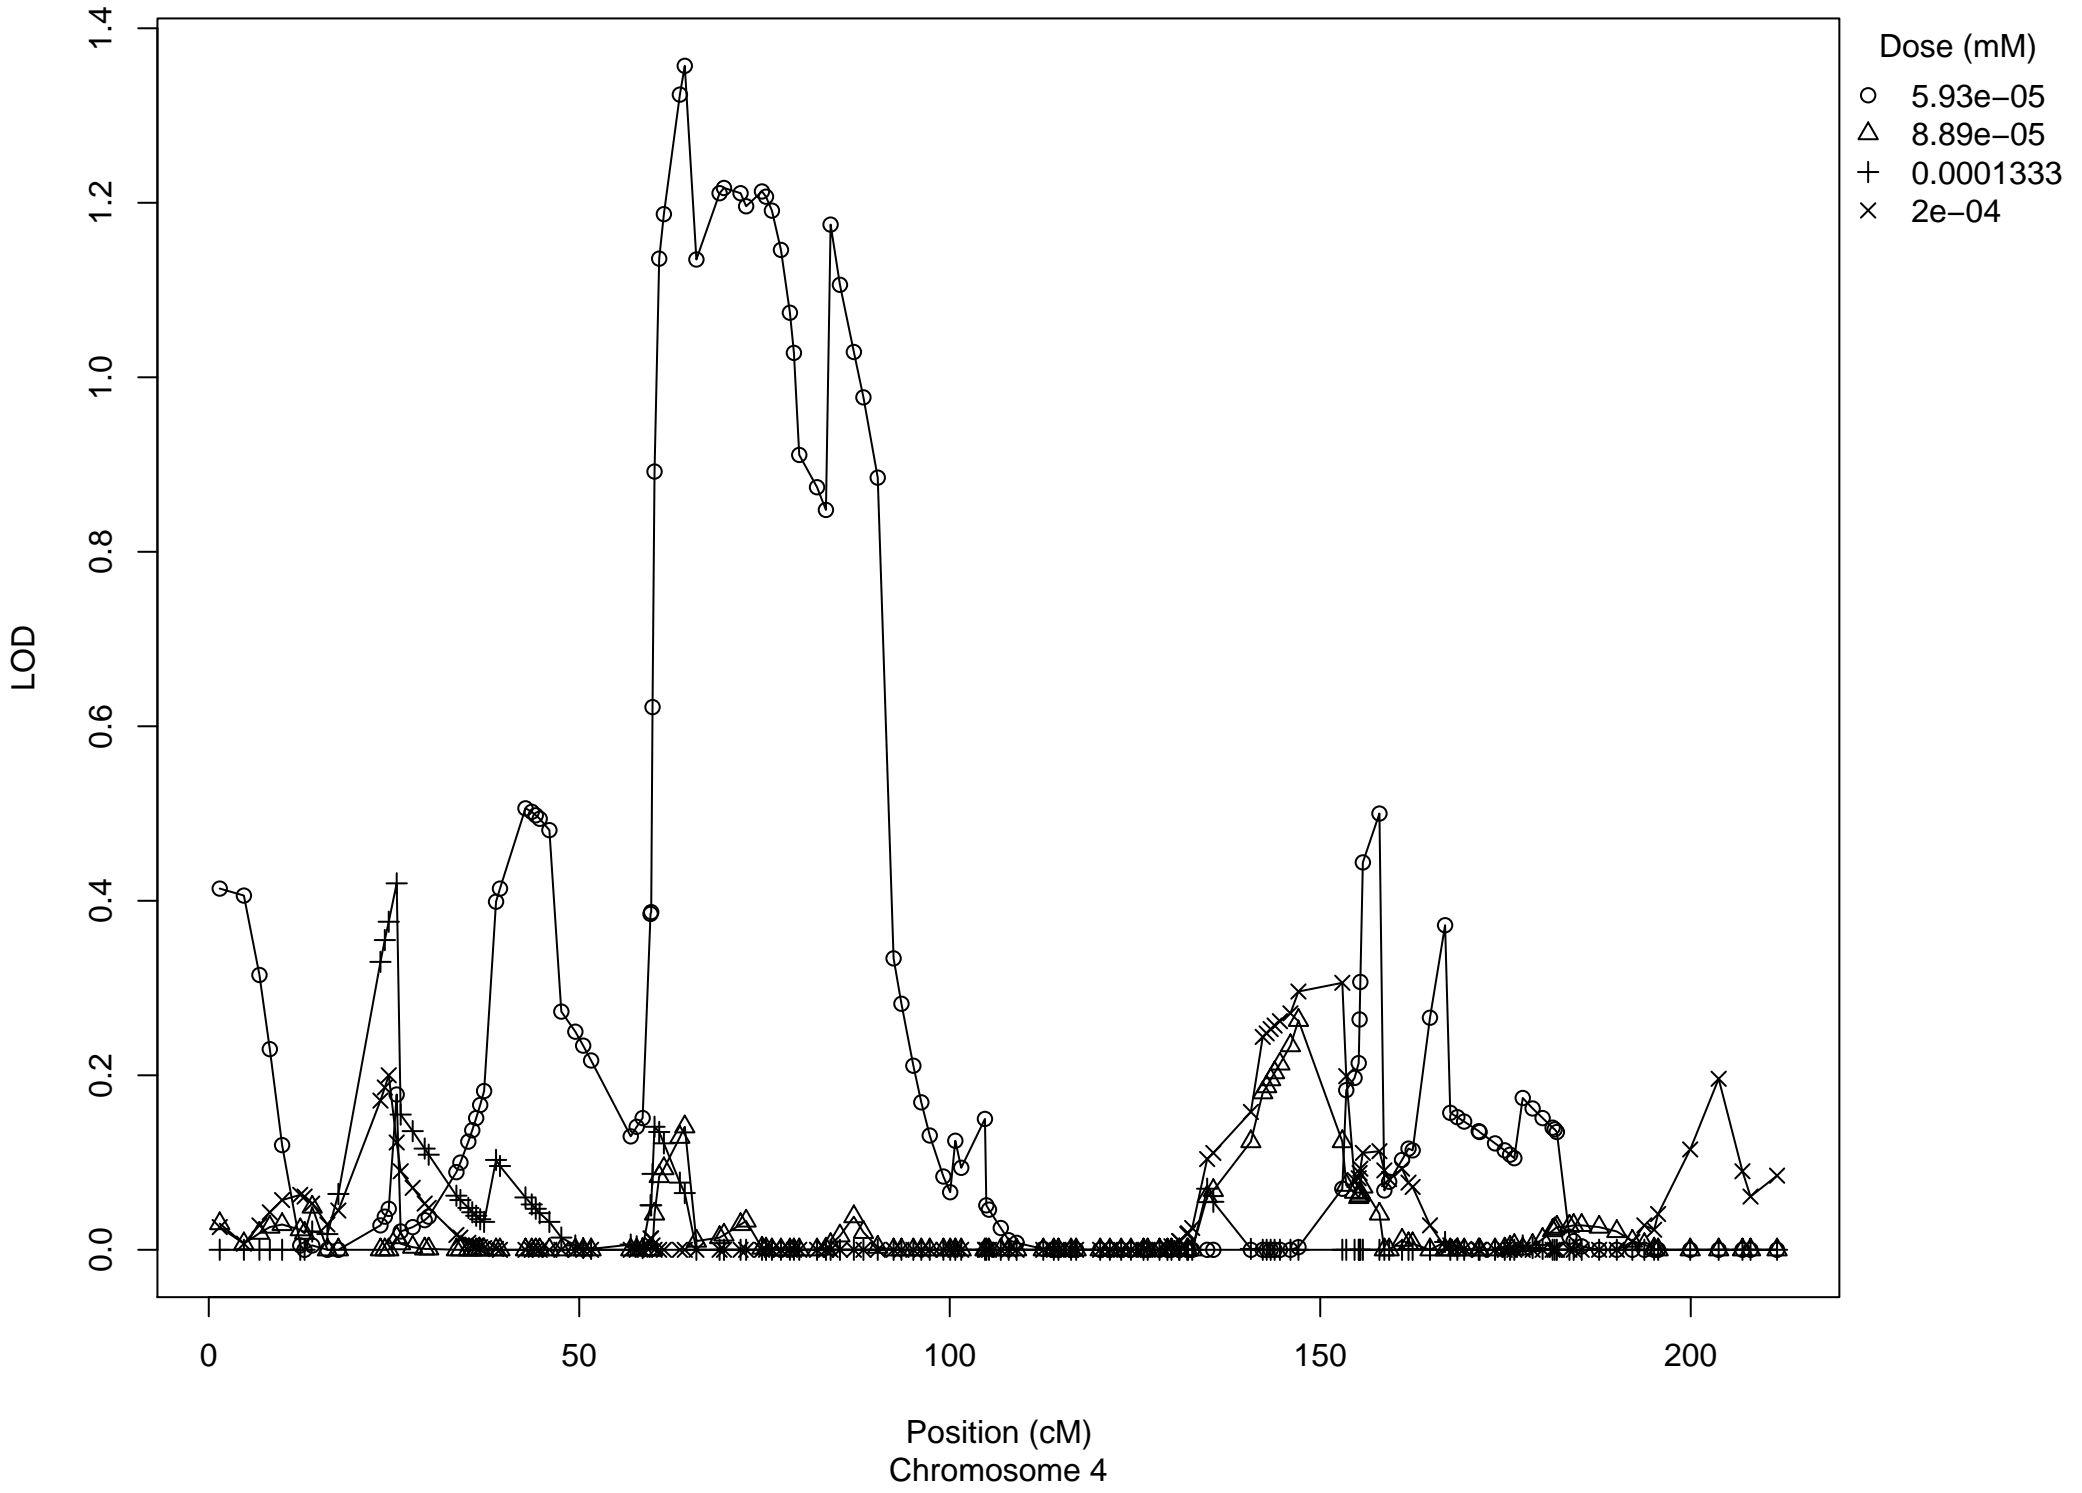

# Vinorelbine ditartrate salt hydrate (Vino)

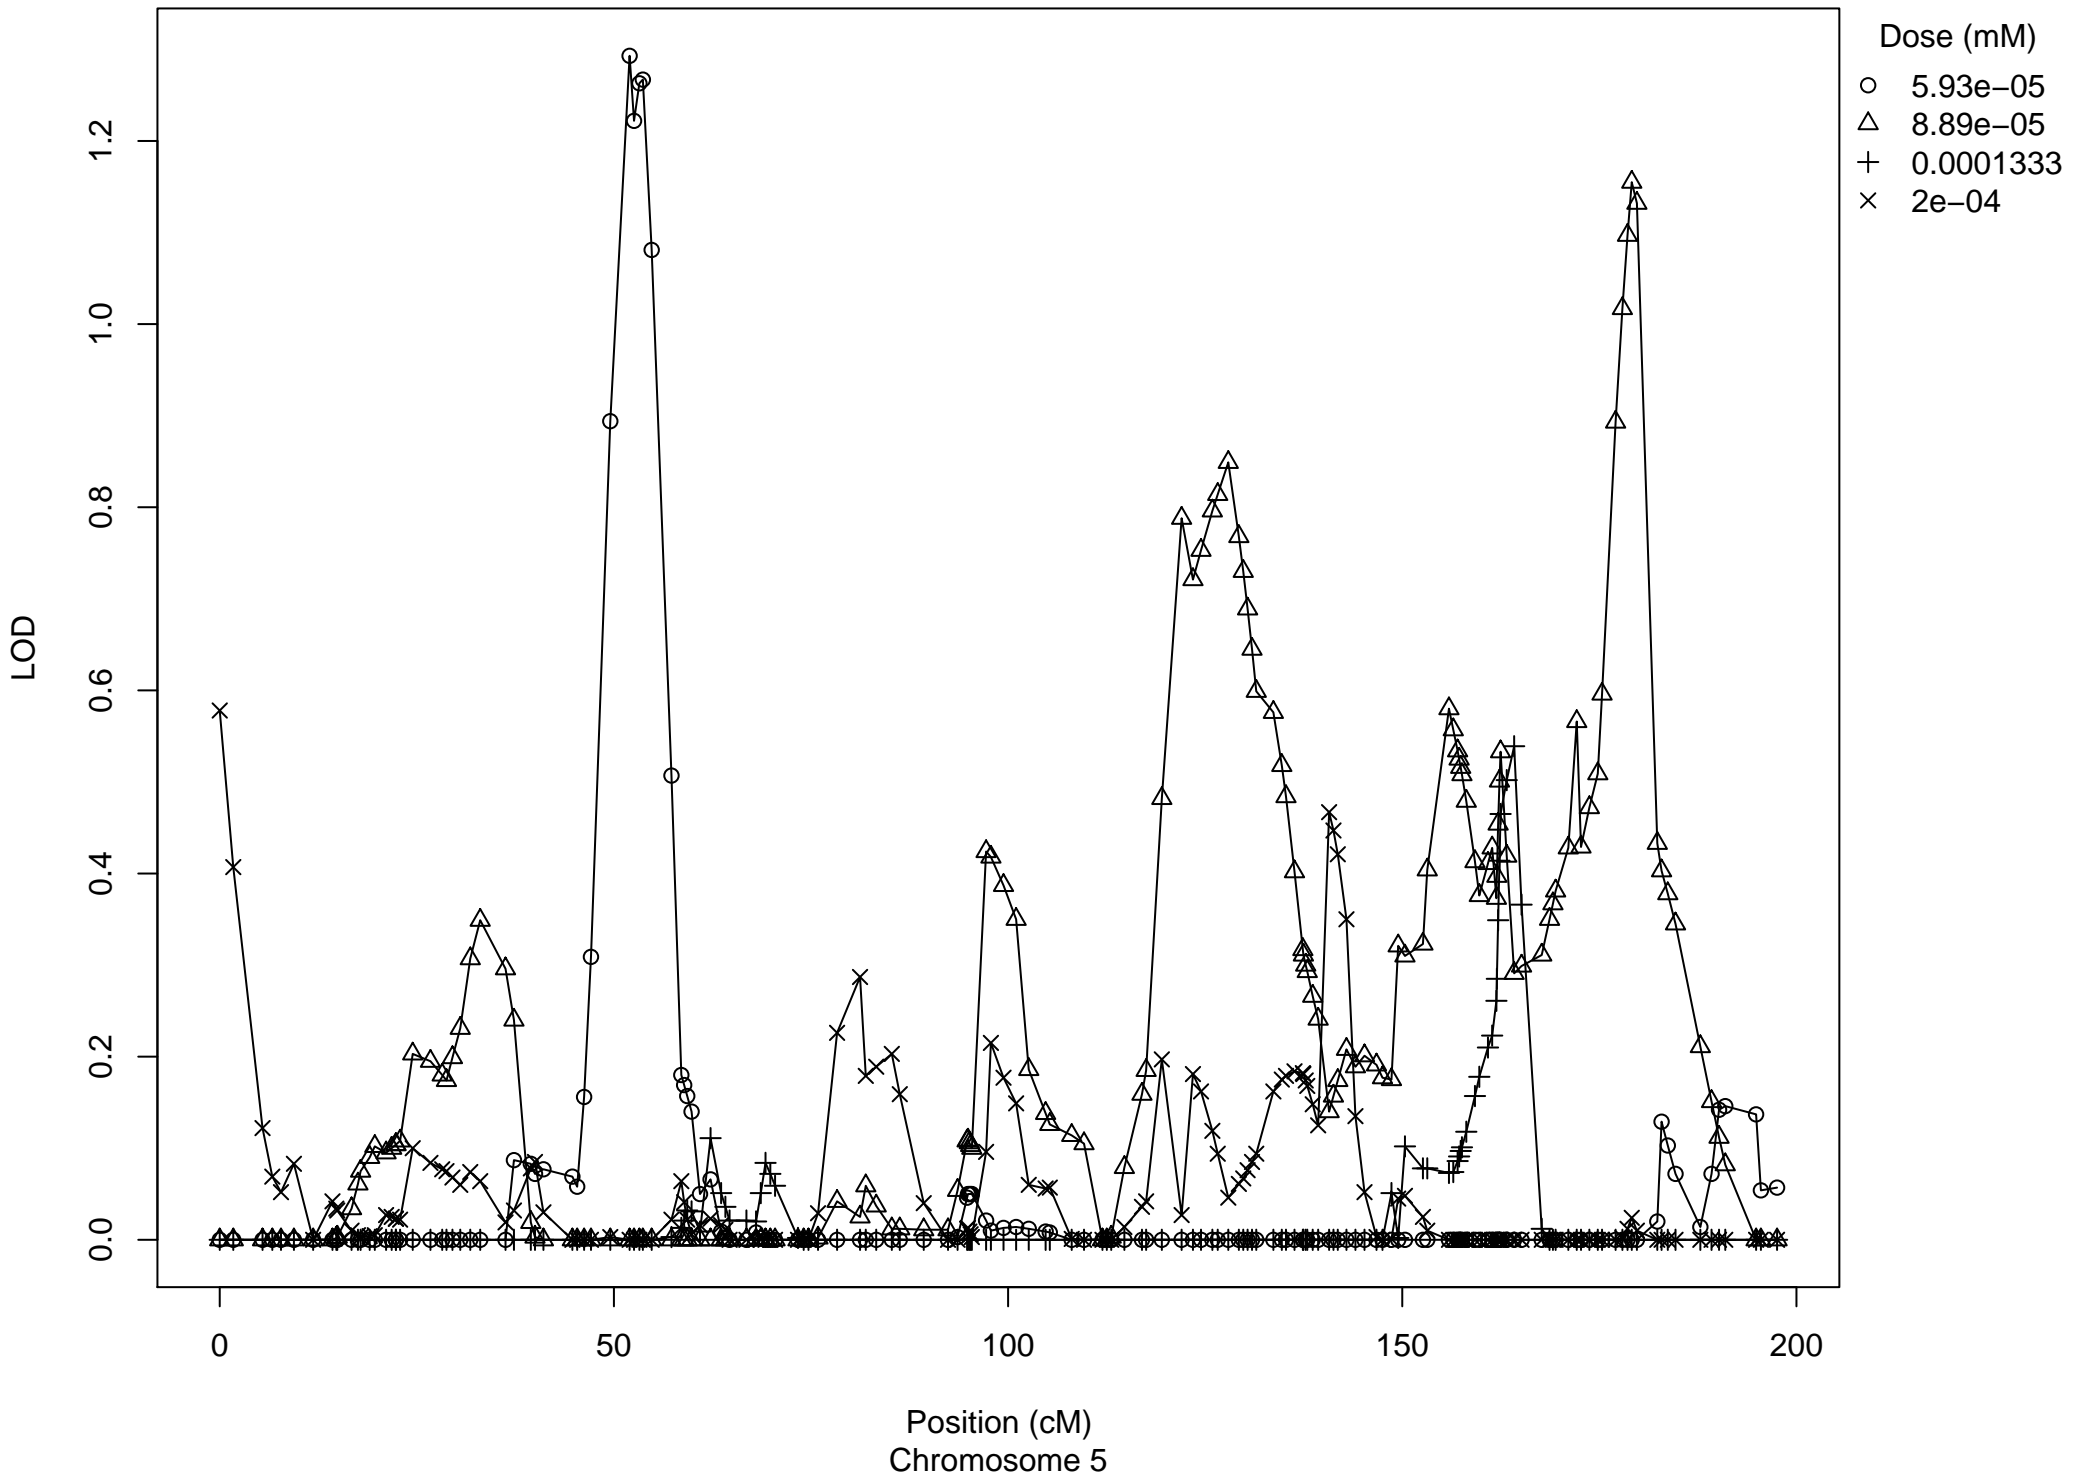

# Vinorelbine ditartrate salt hydrate (Vino)

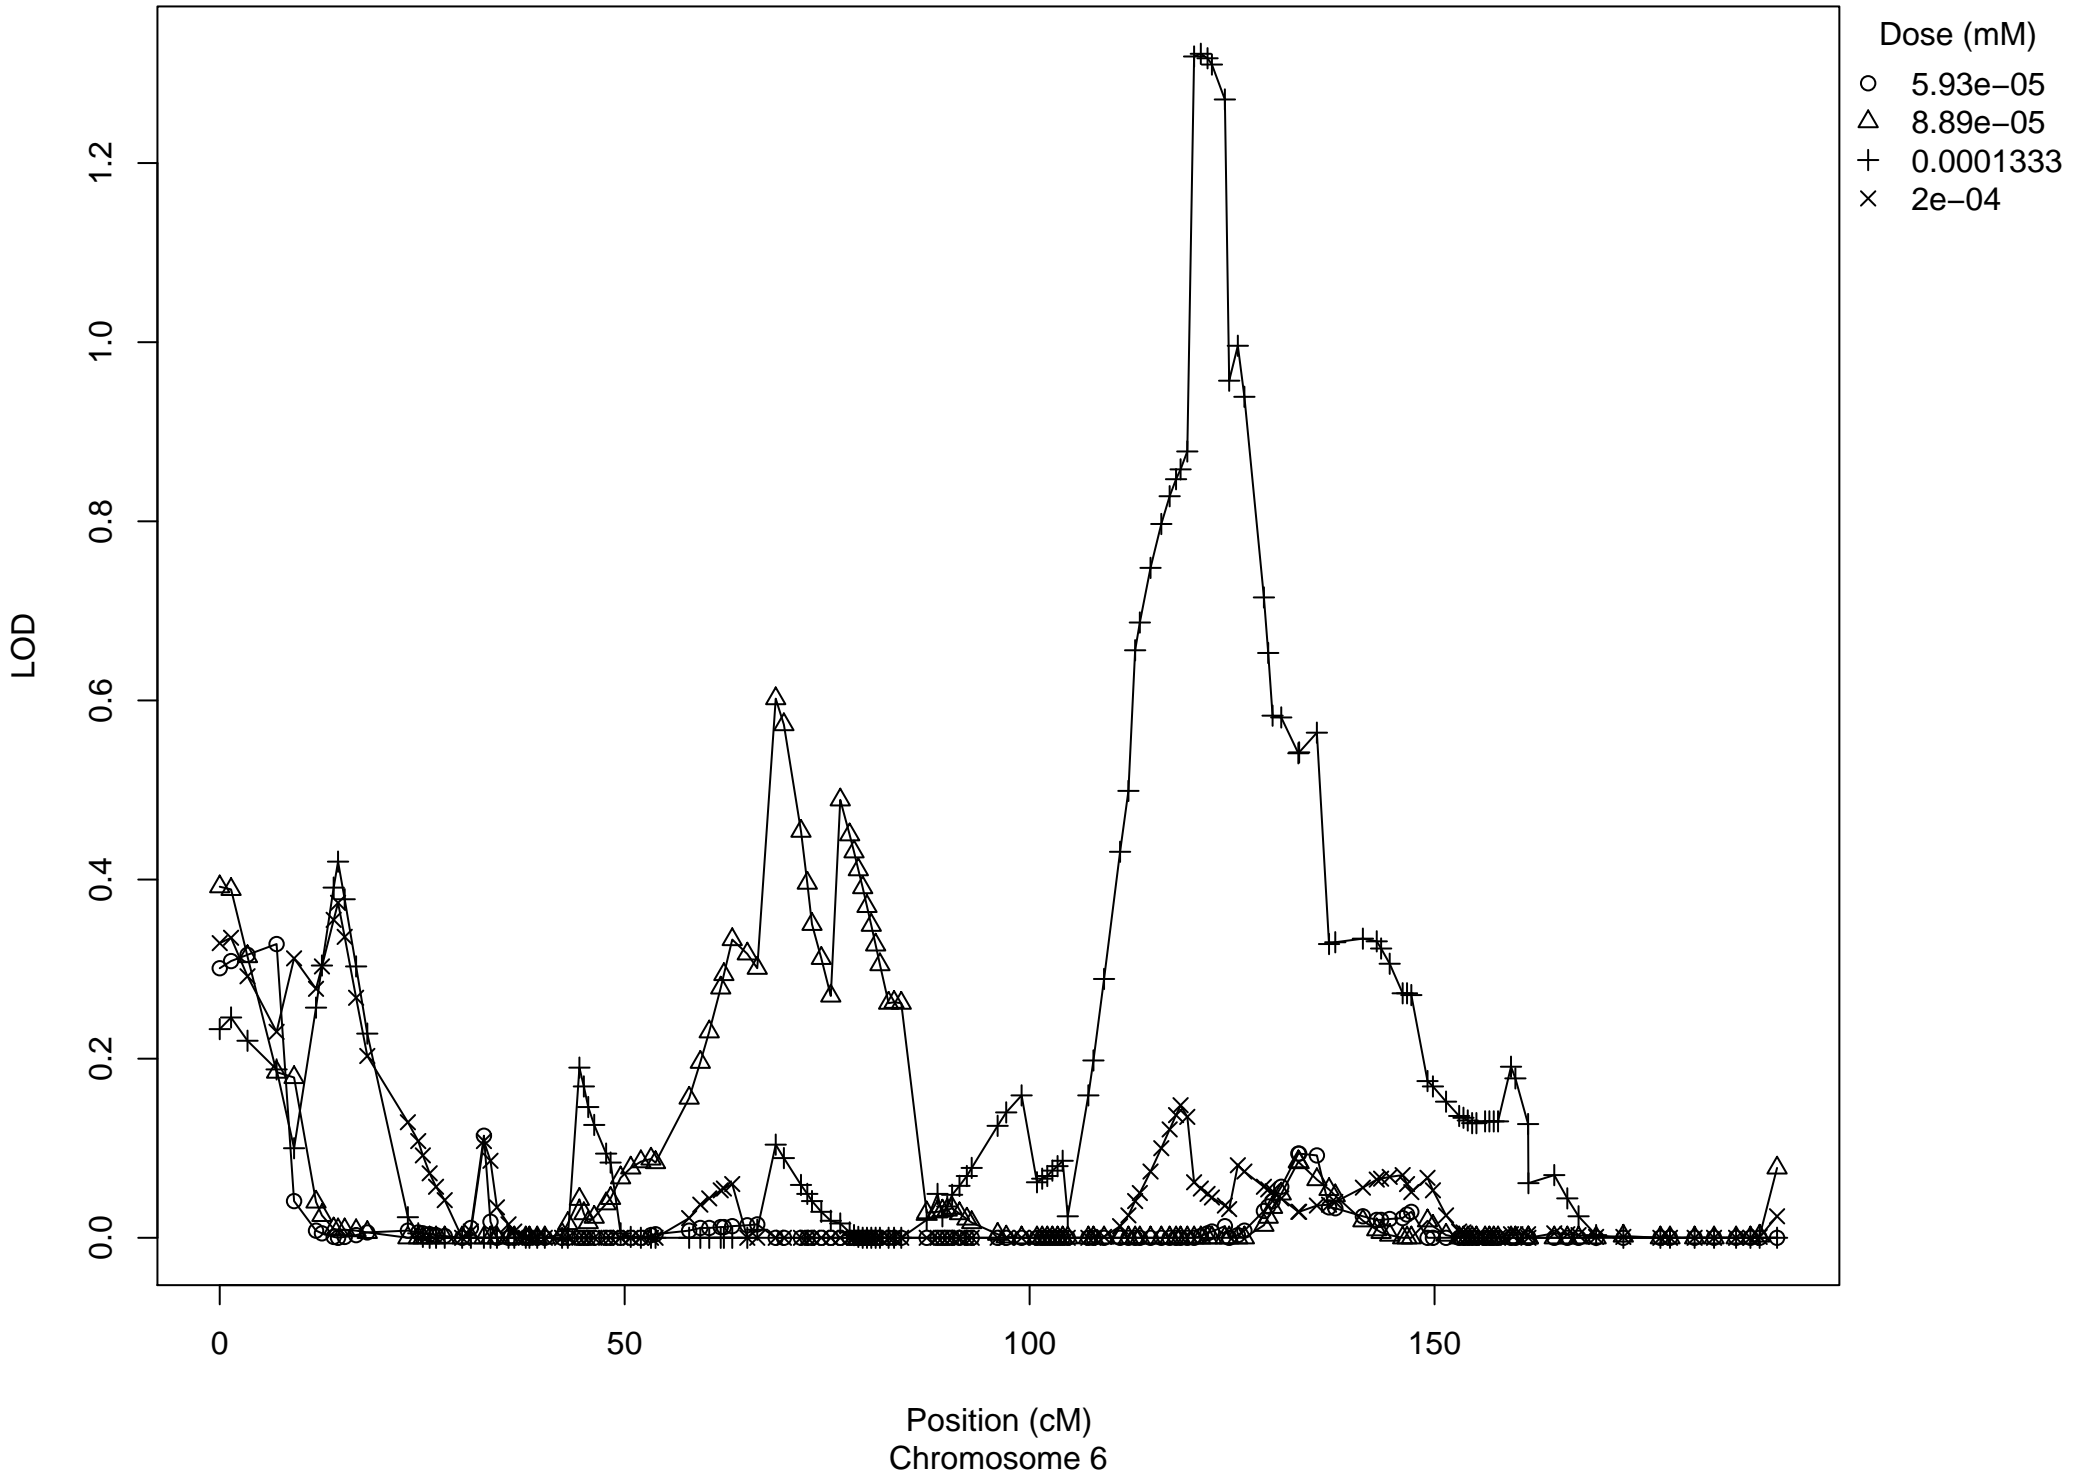

# Vinorelbine ditartrate salt hydrate (Vino)

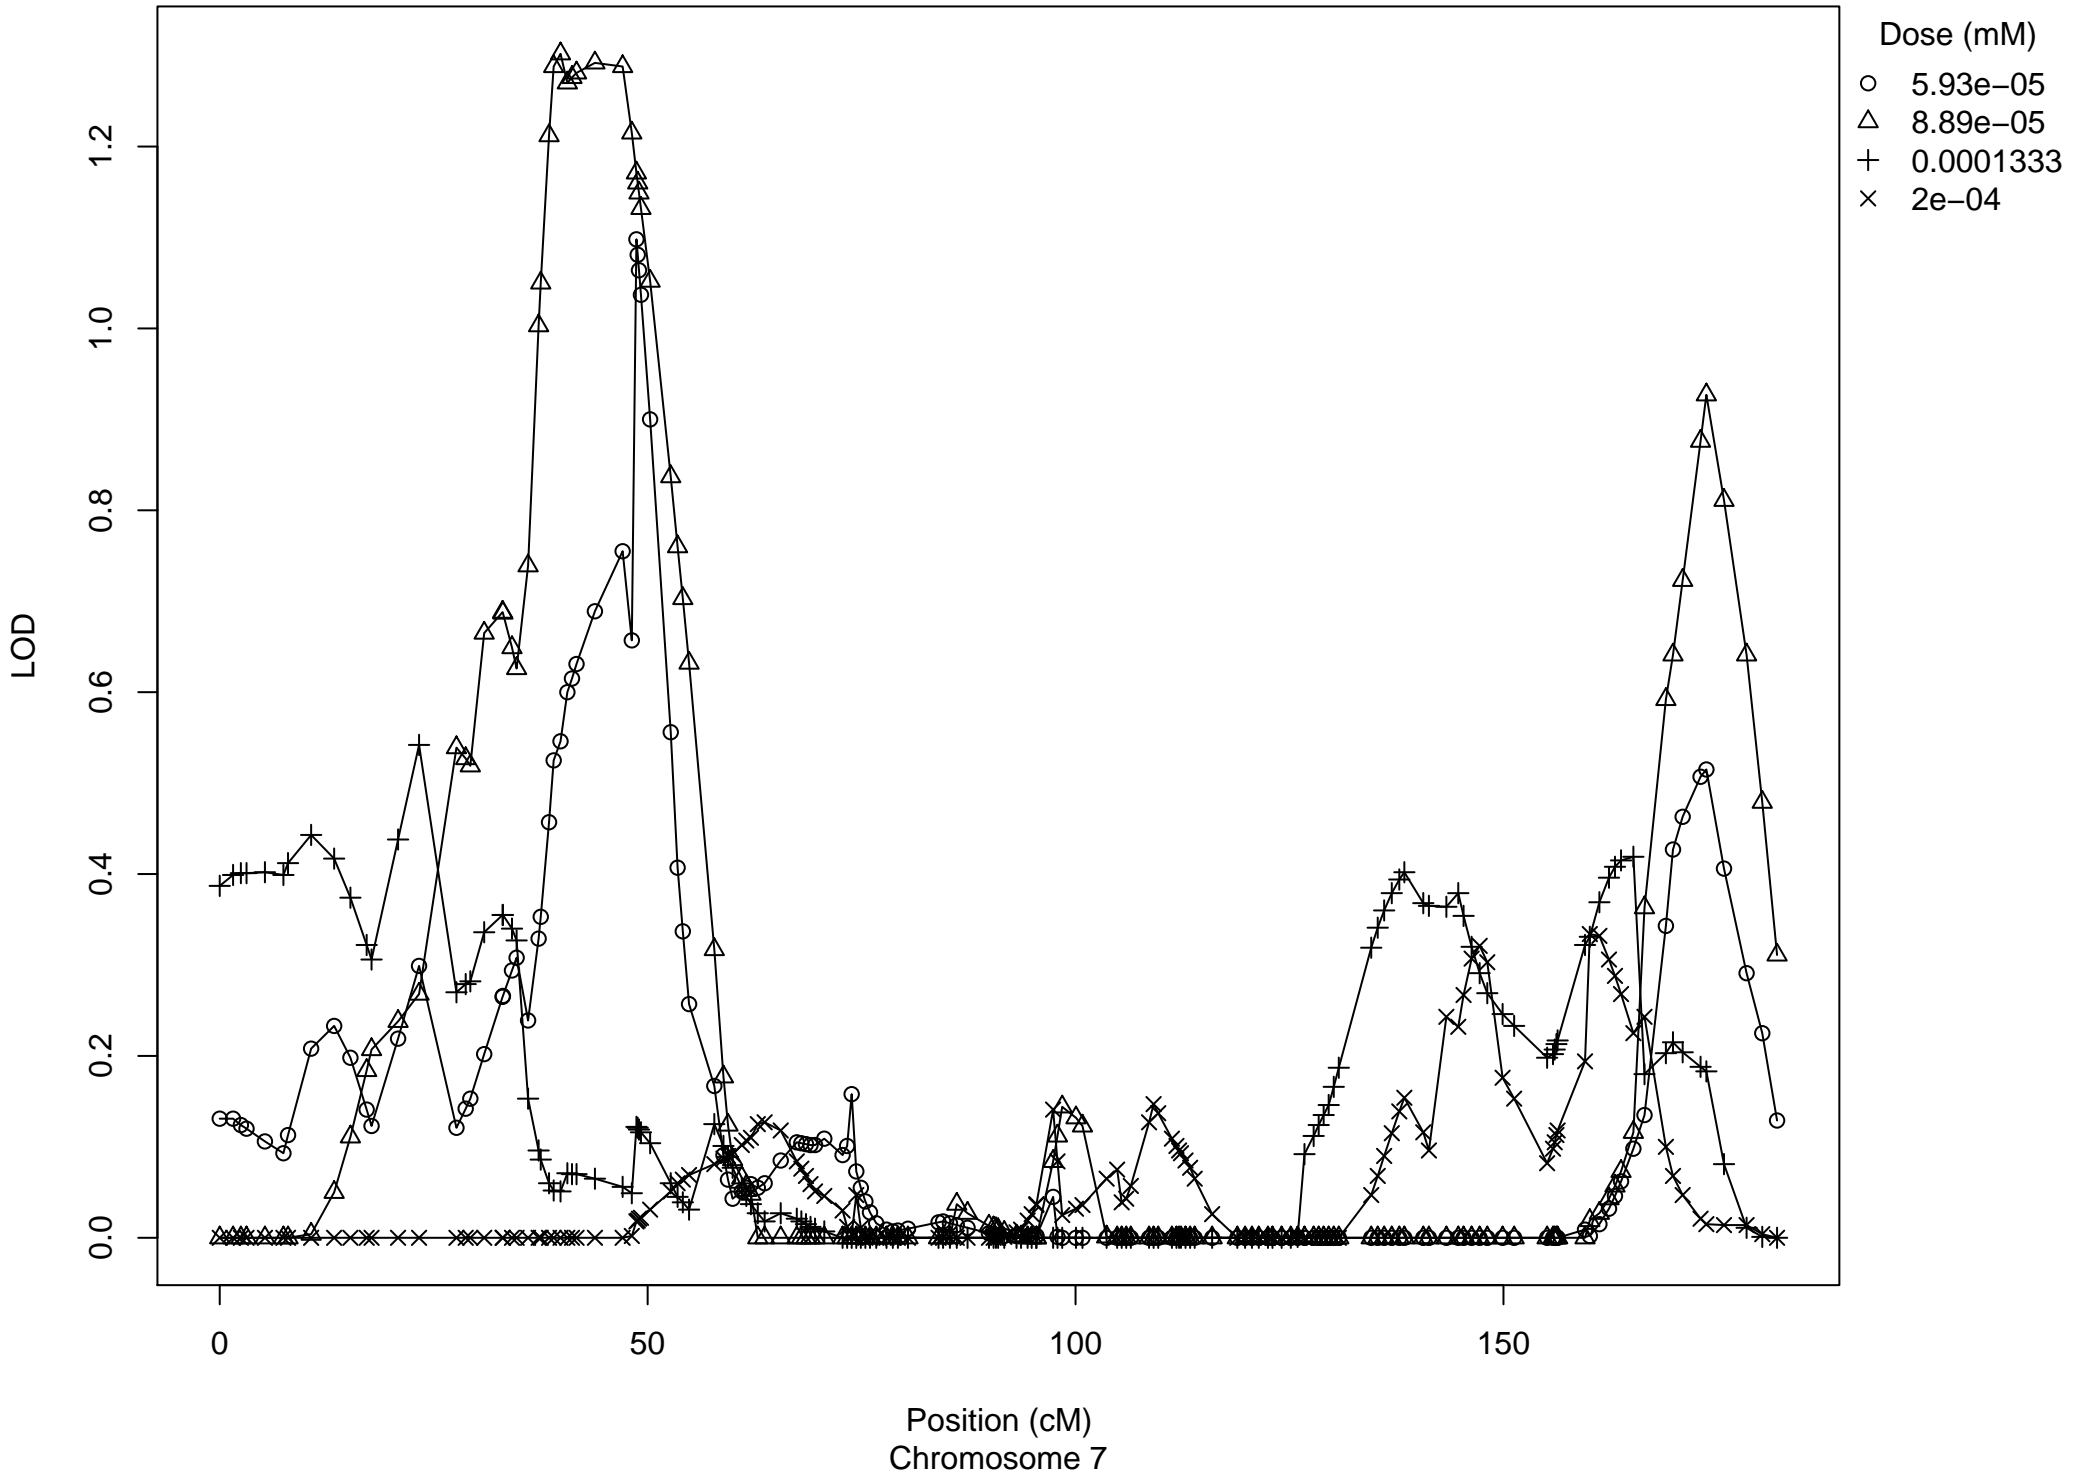

# Vinorelbine ditartrate salt hydrate (Vino)

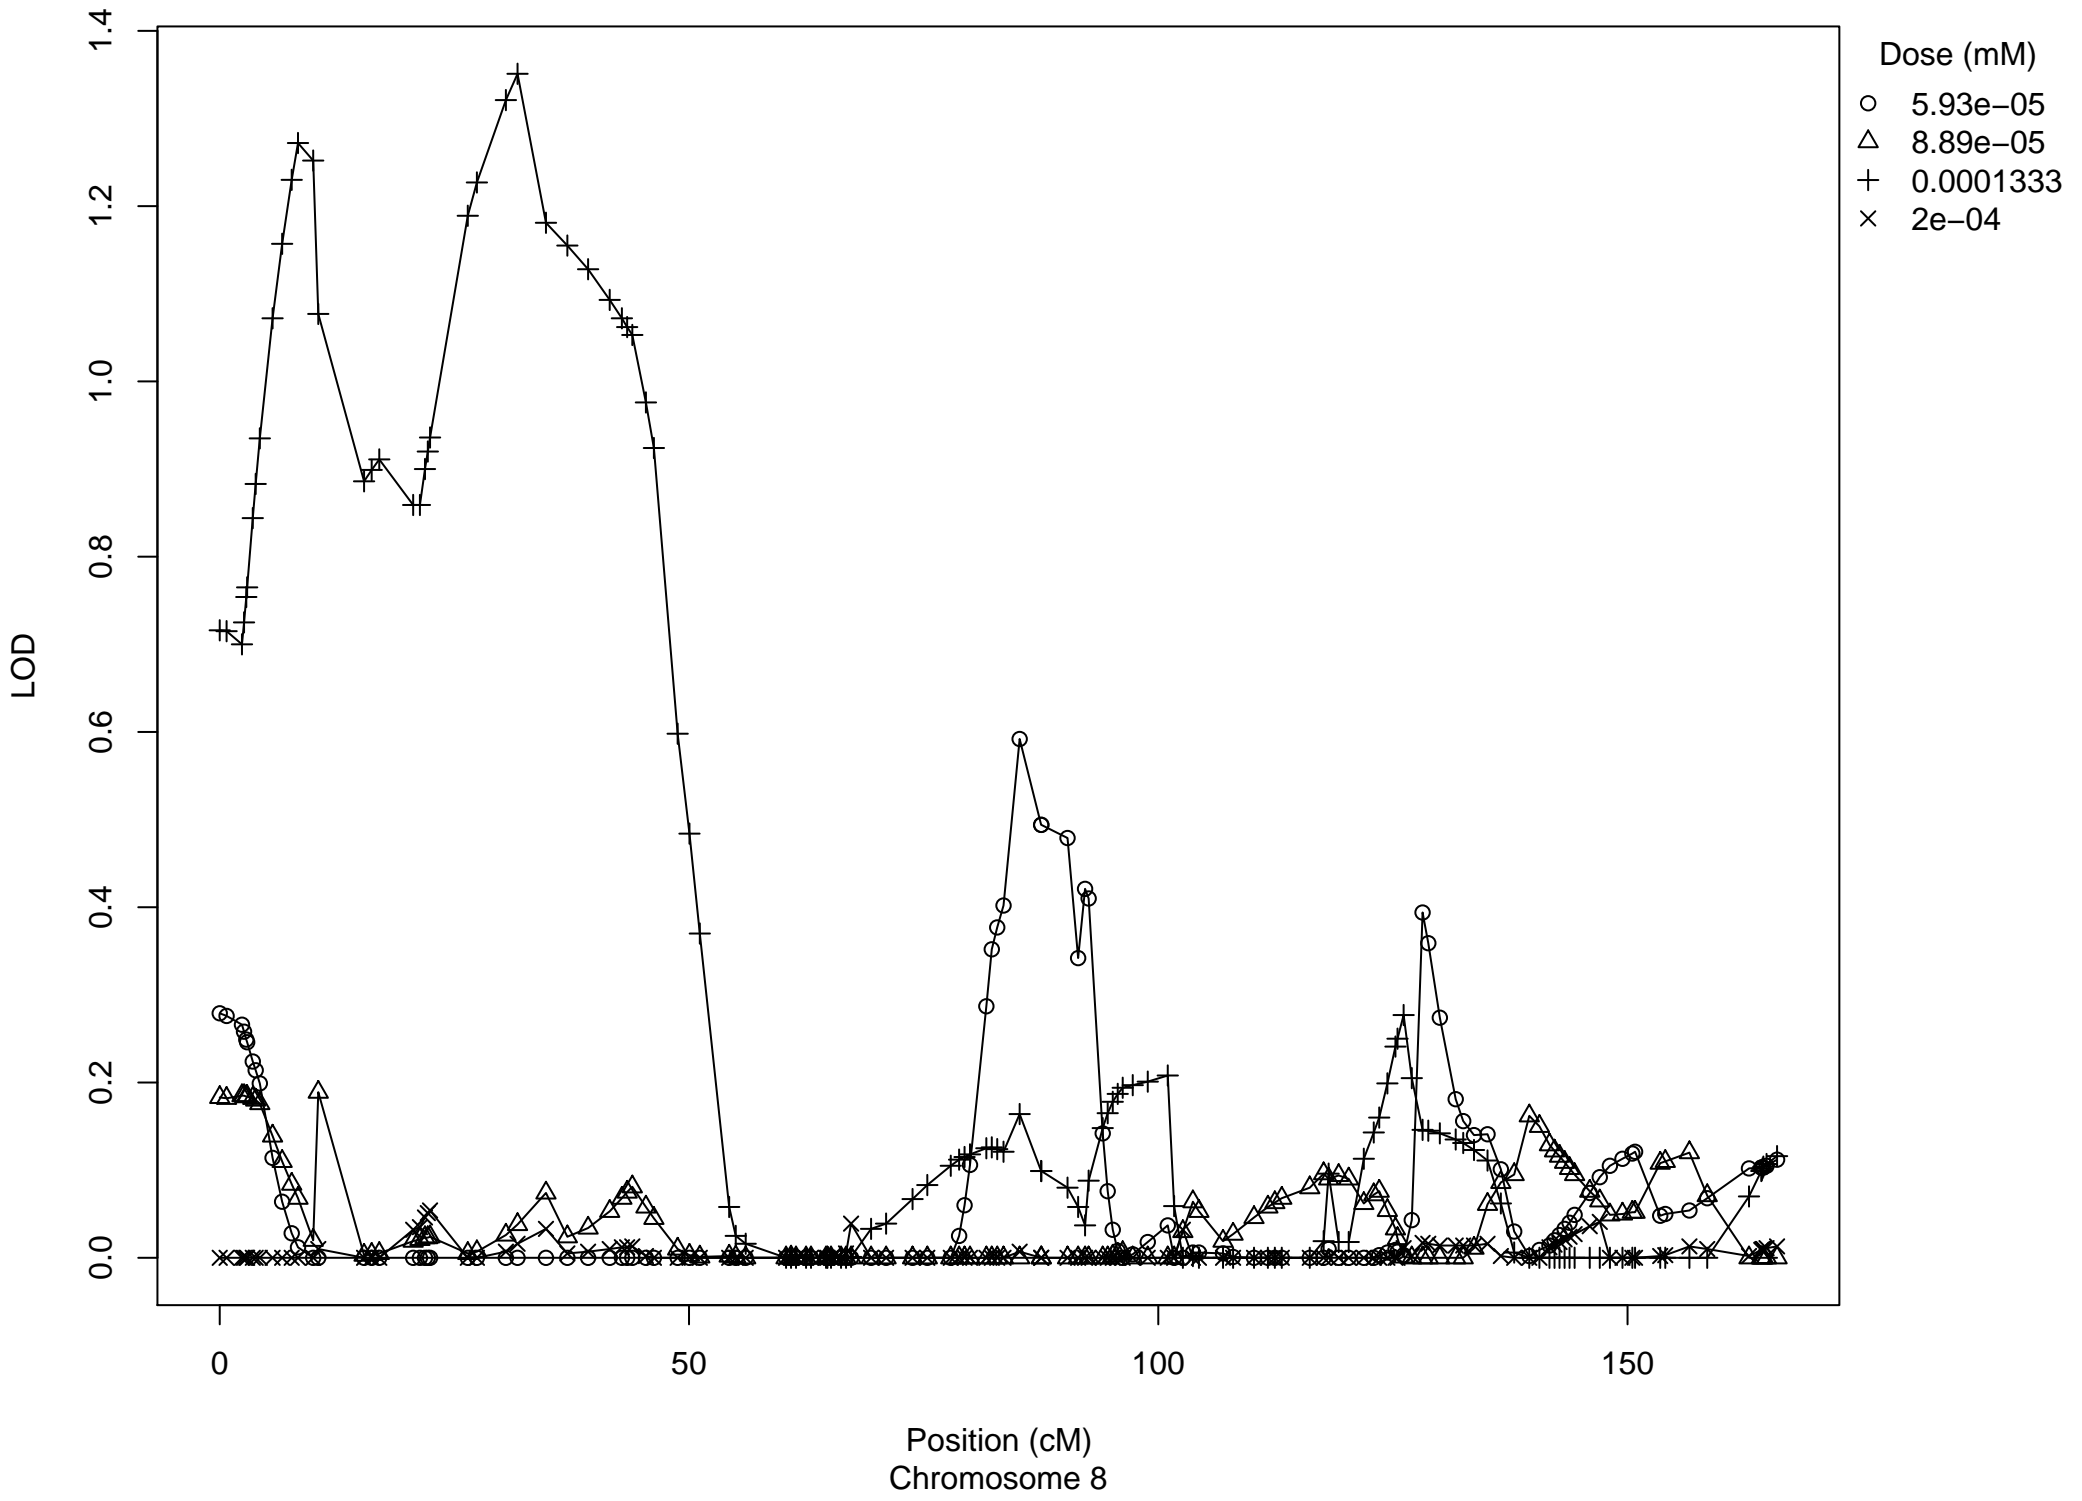



# Vinorelbine ditartrate salt hydrate (Vino)

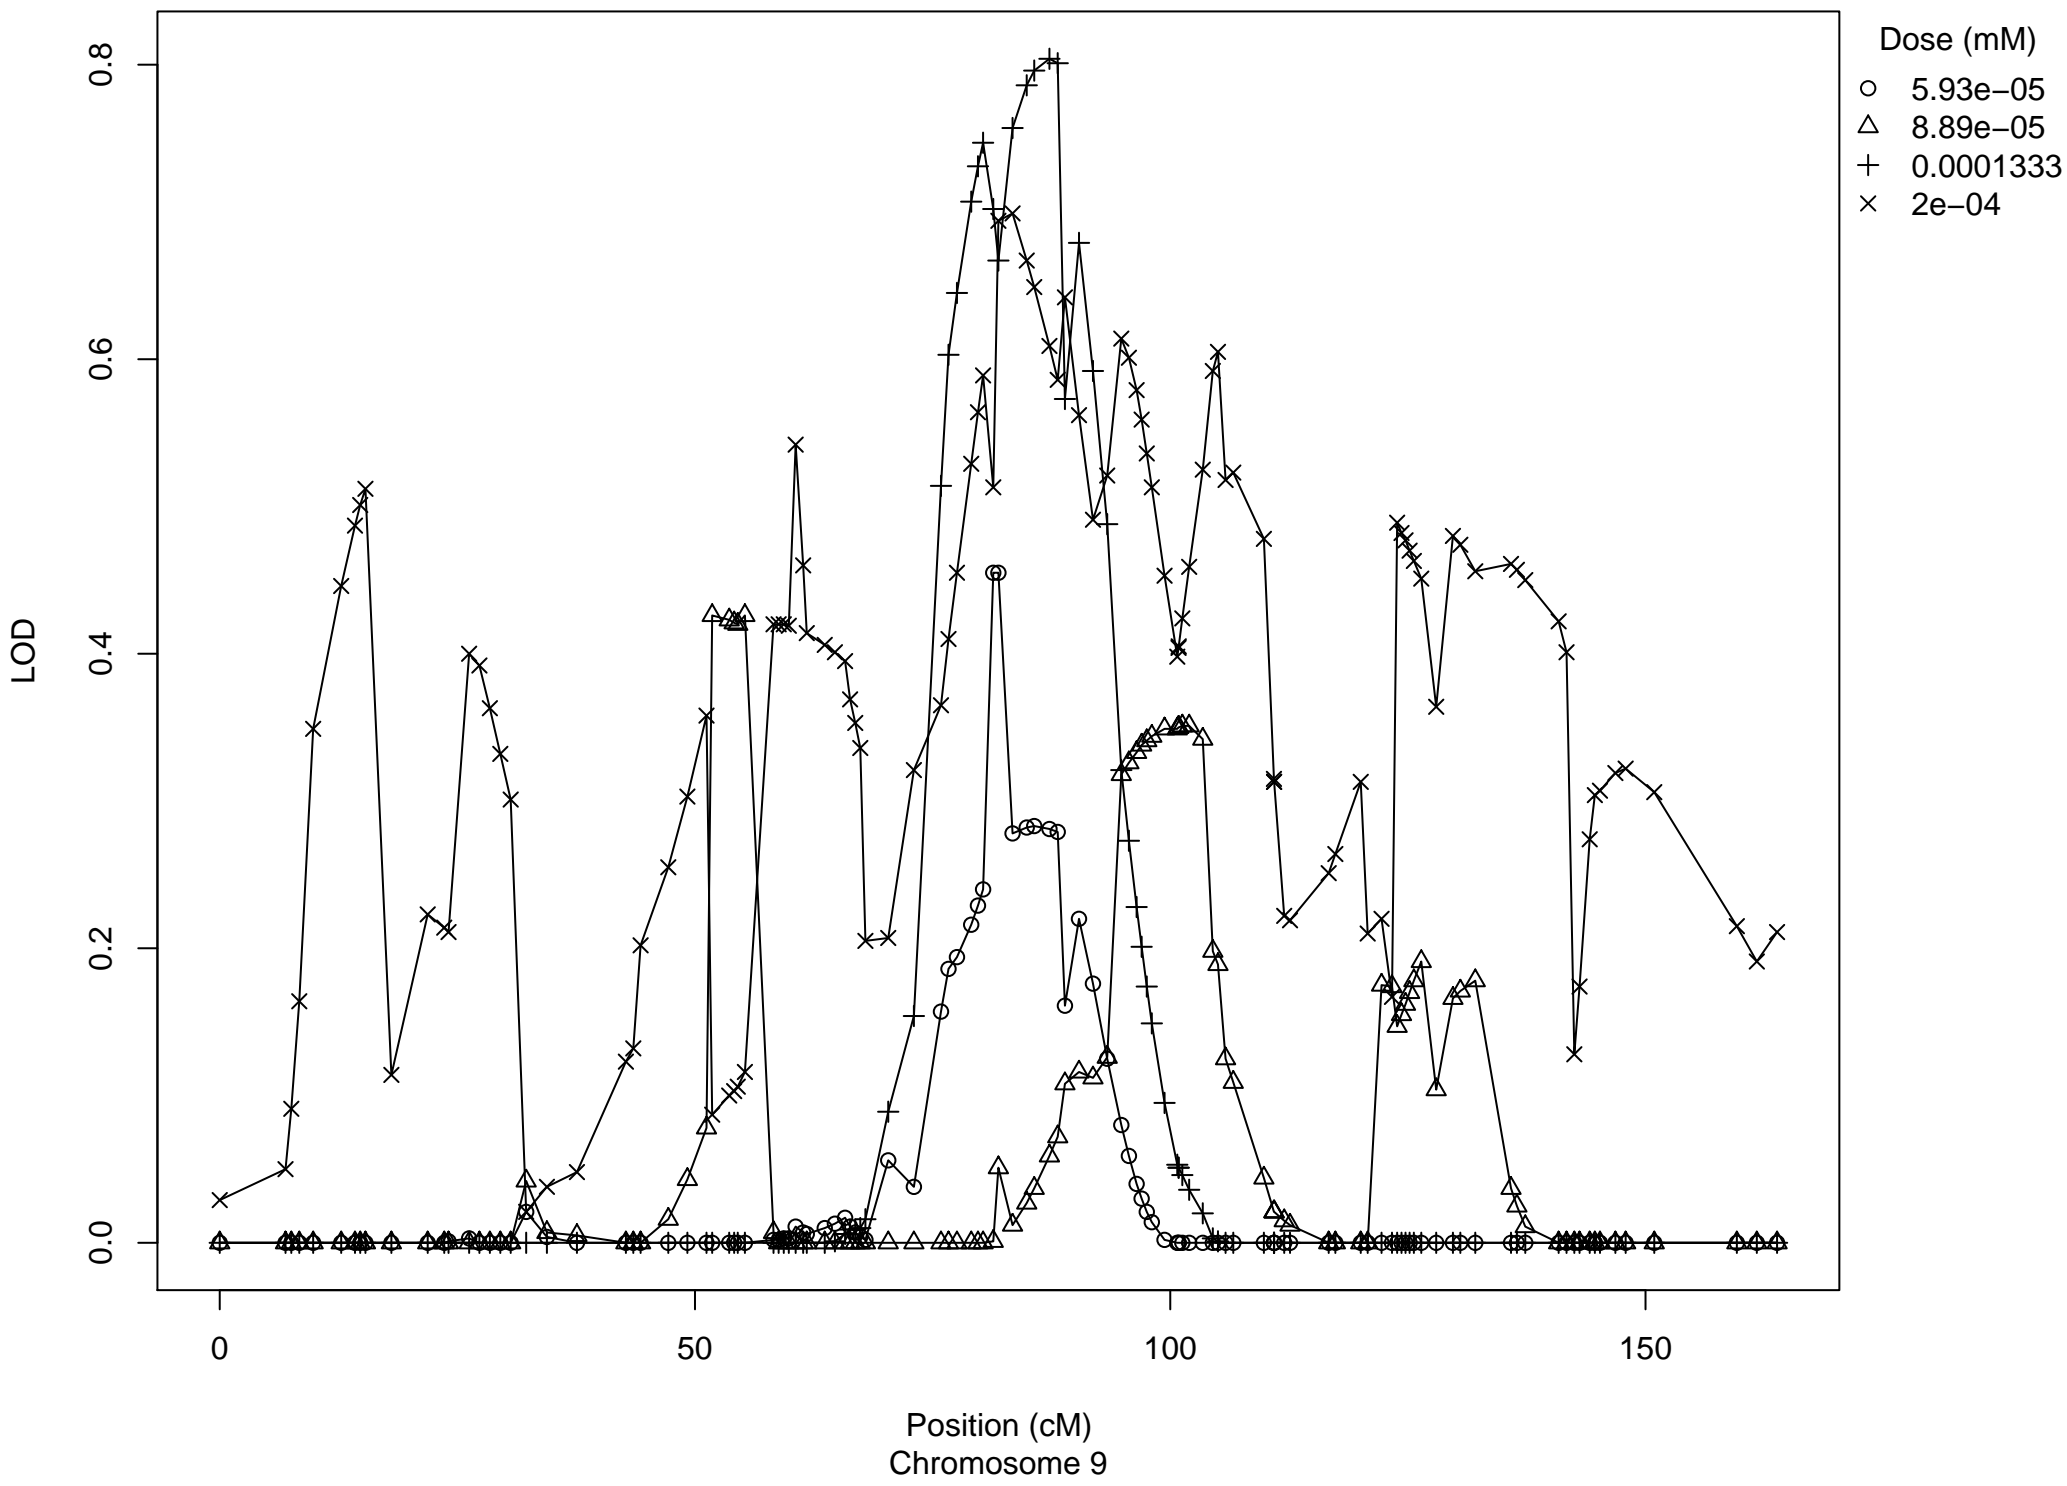

# Vinorelbine ditartrate salt hydrate (Vino)

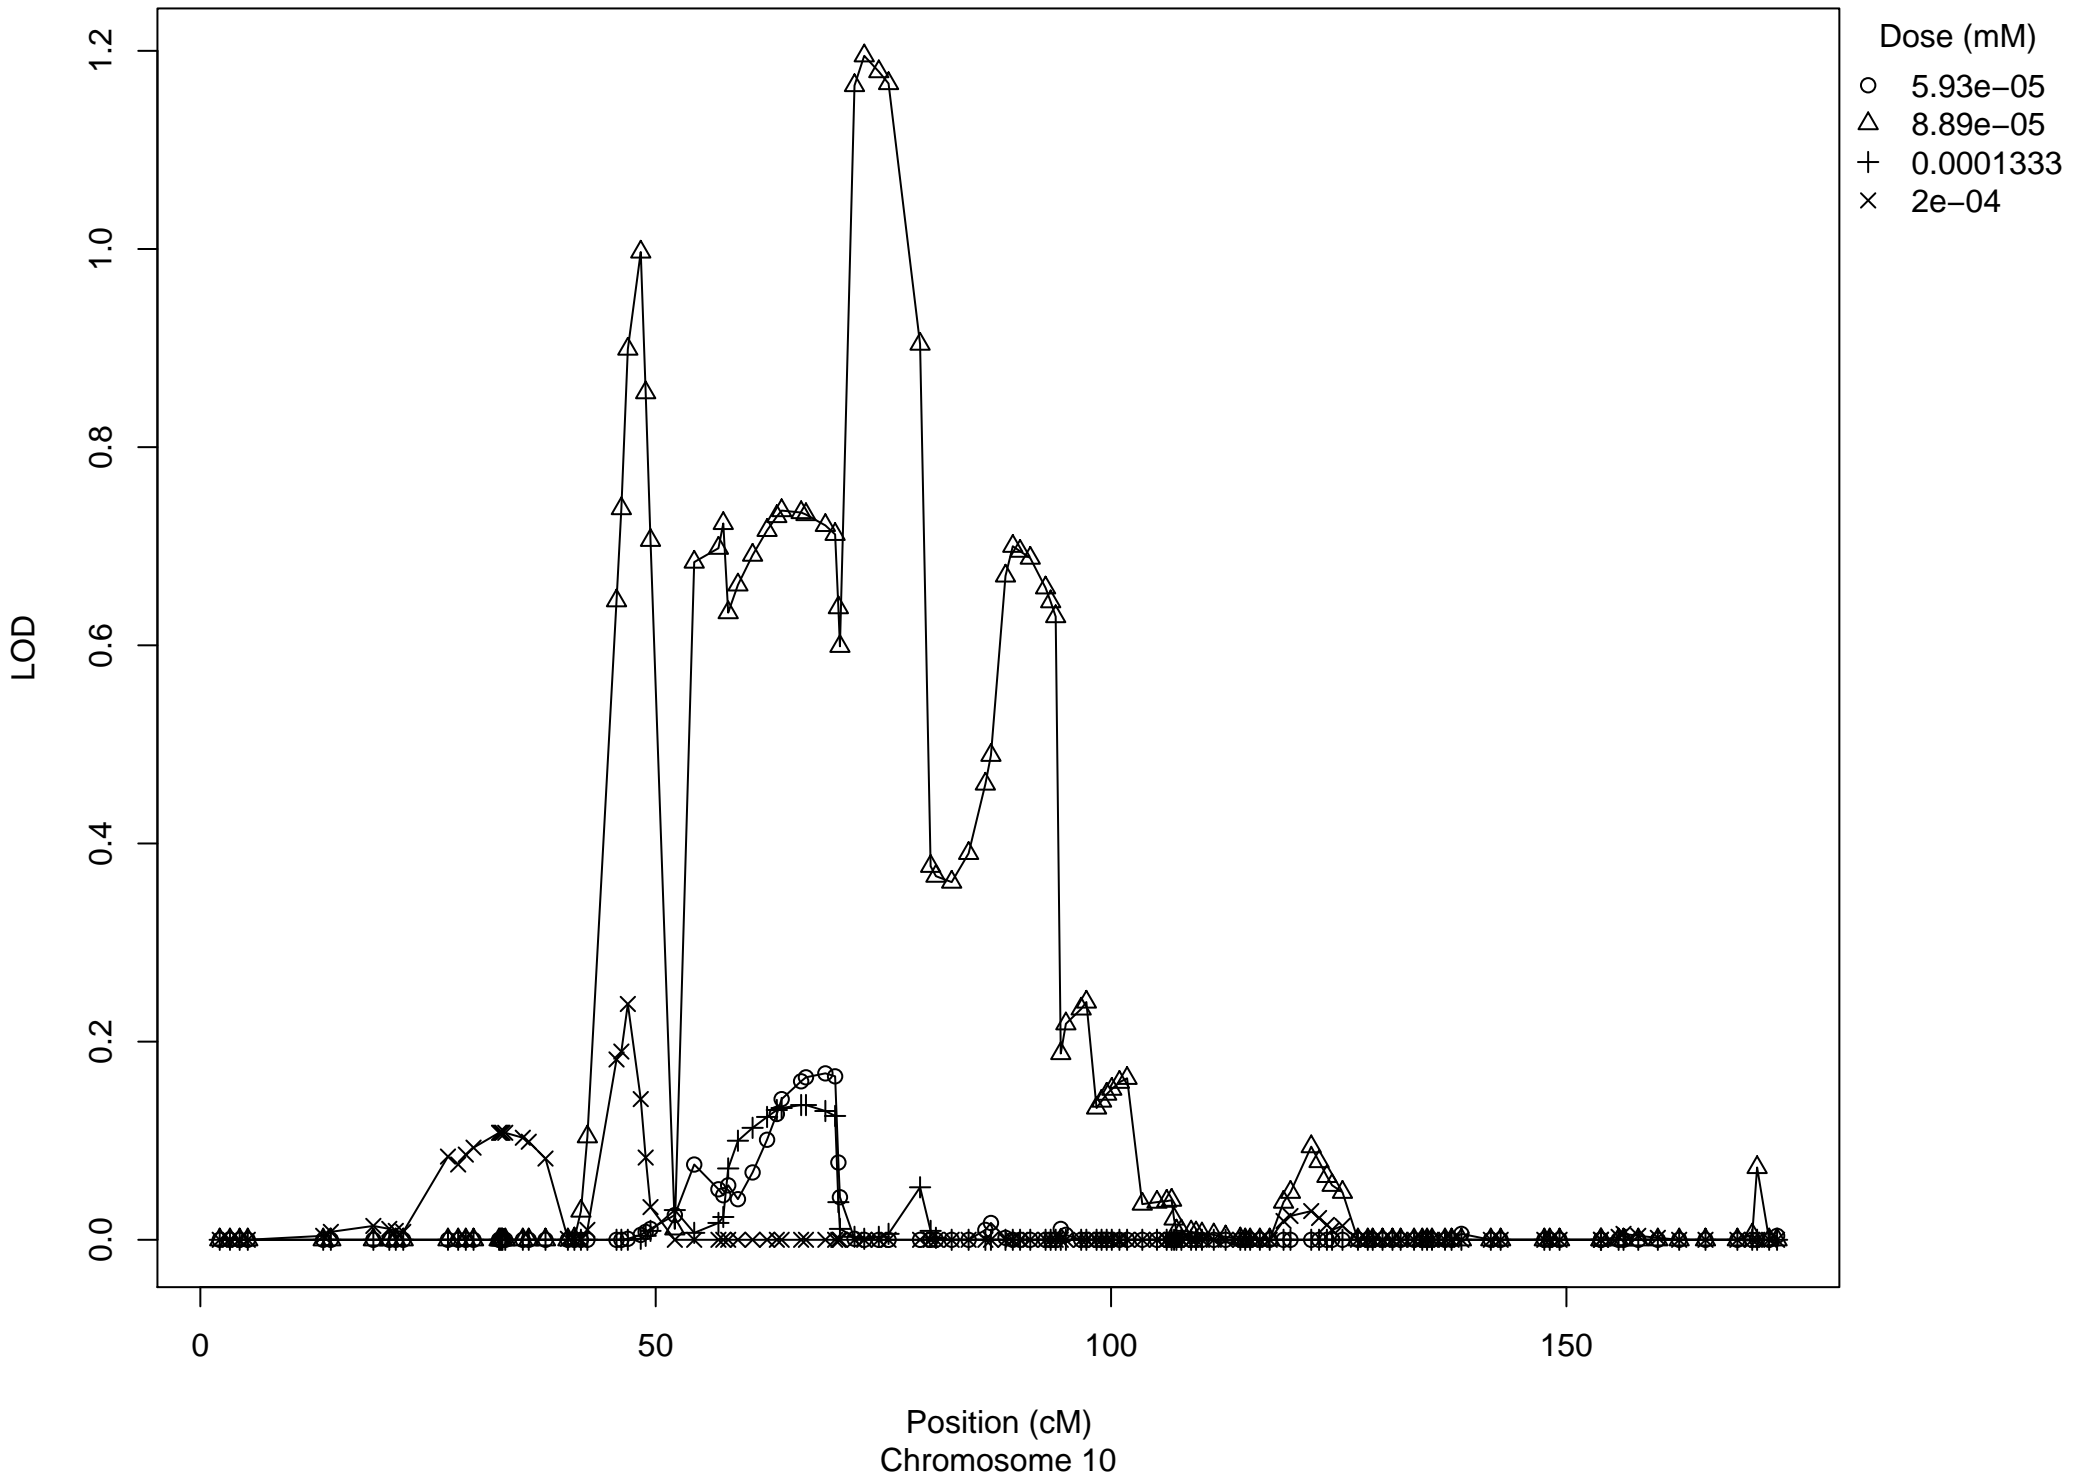

# Vinorelbine ditartrate salt hydrate (Vino)

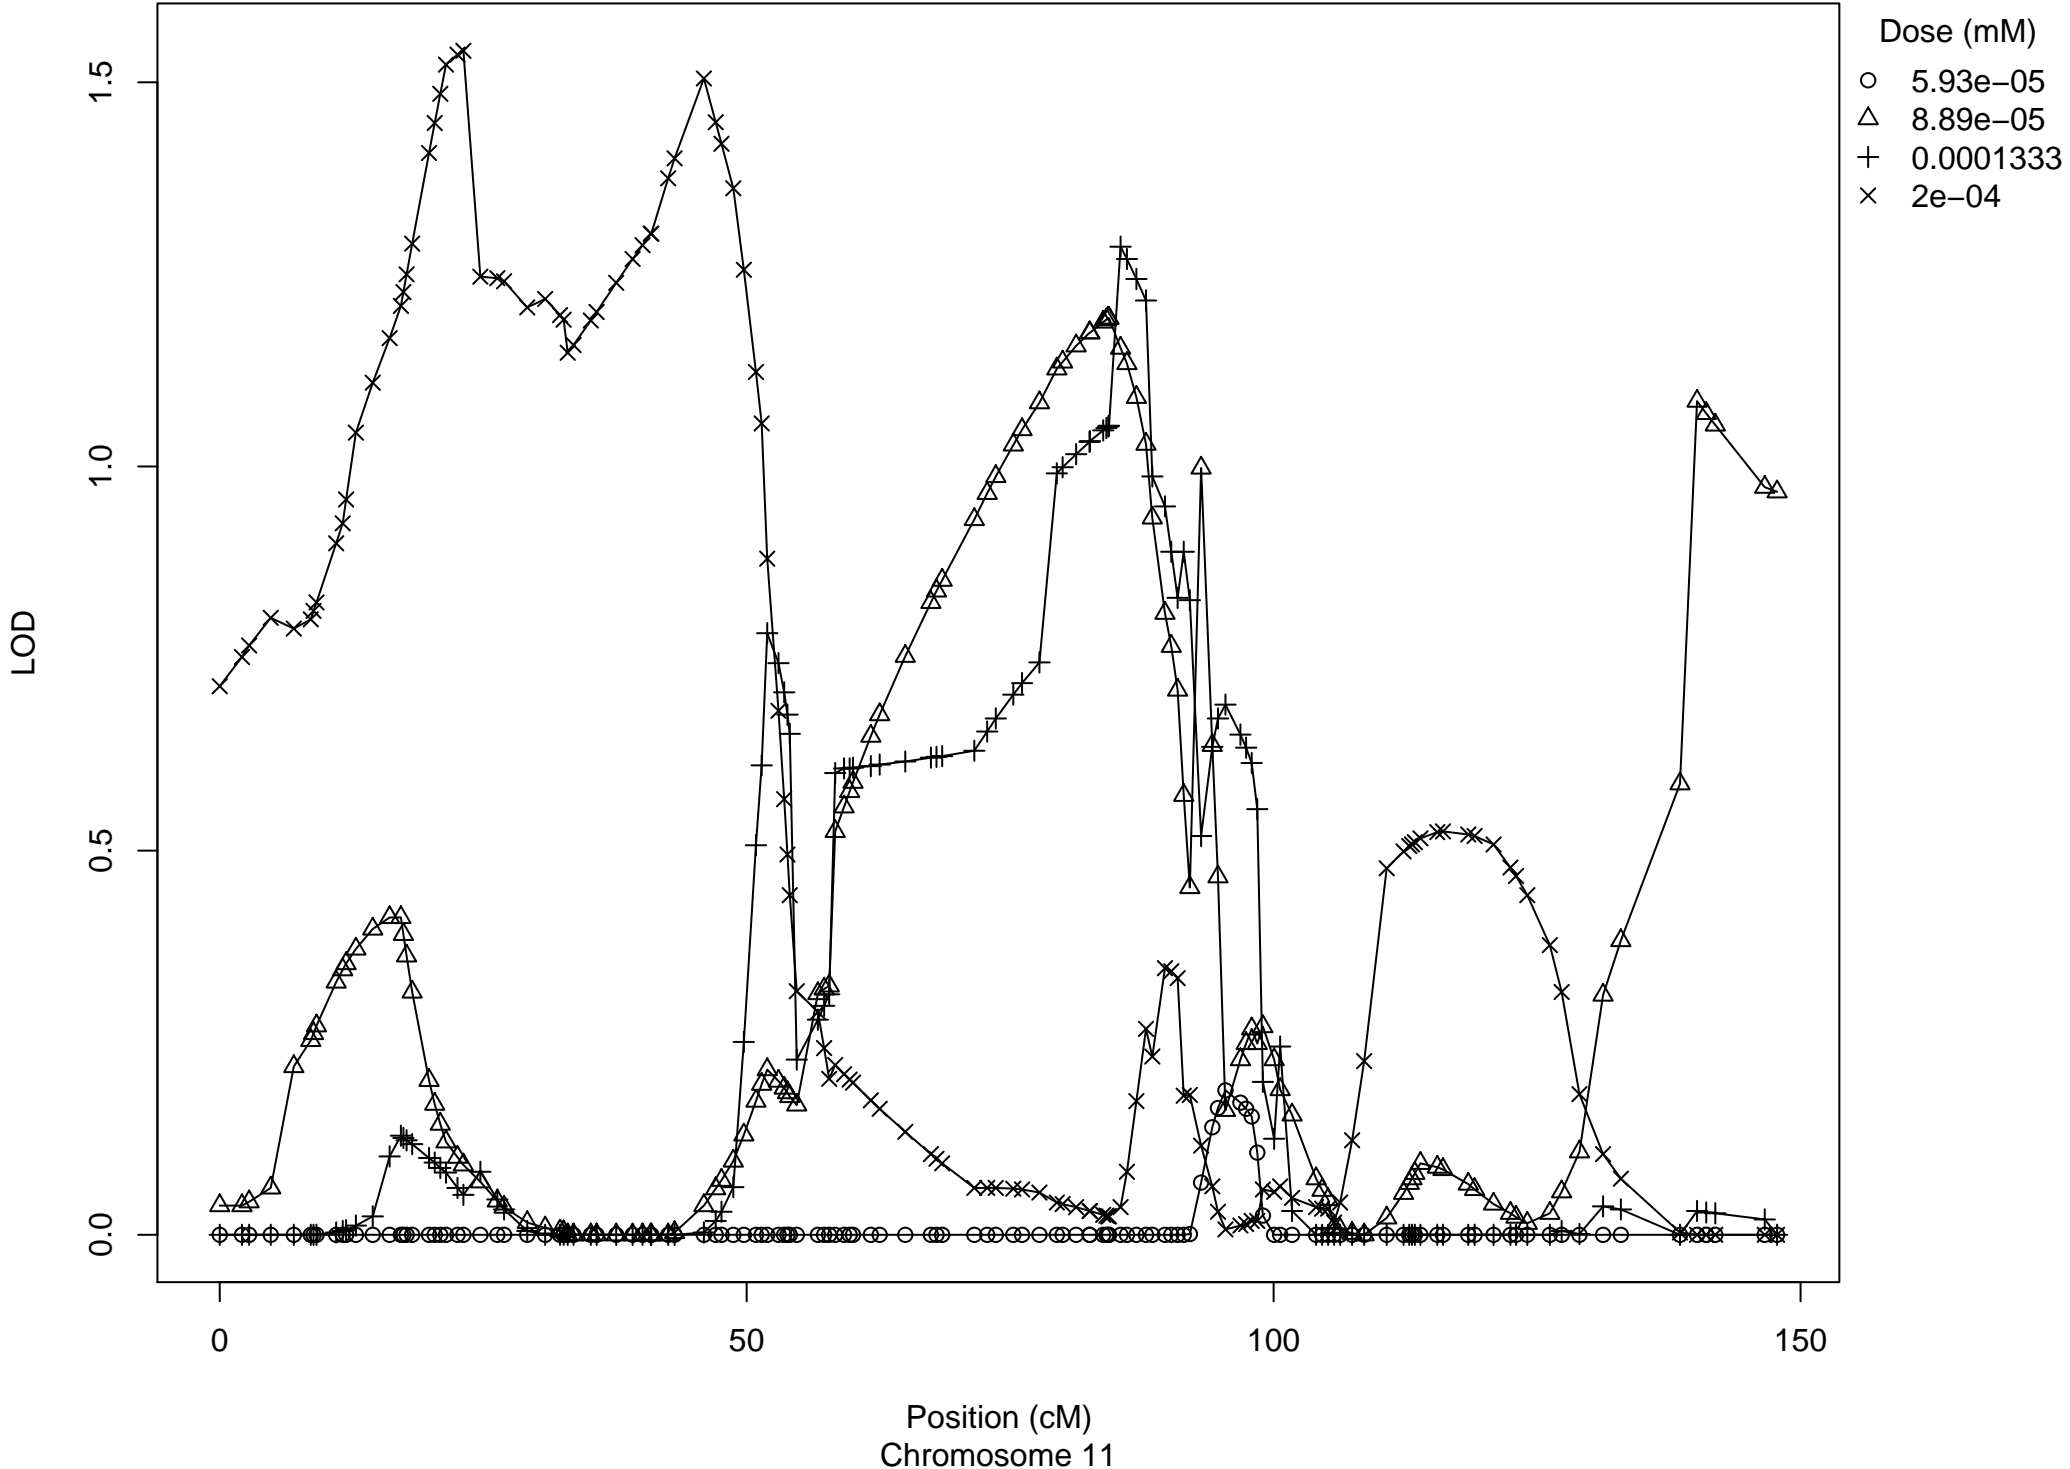

# Vinorelbine ditartrate salt hydrate (Vino)

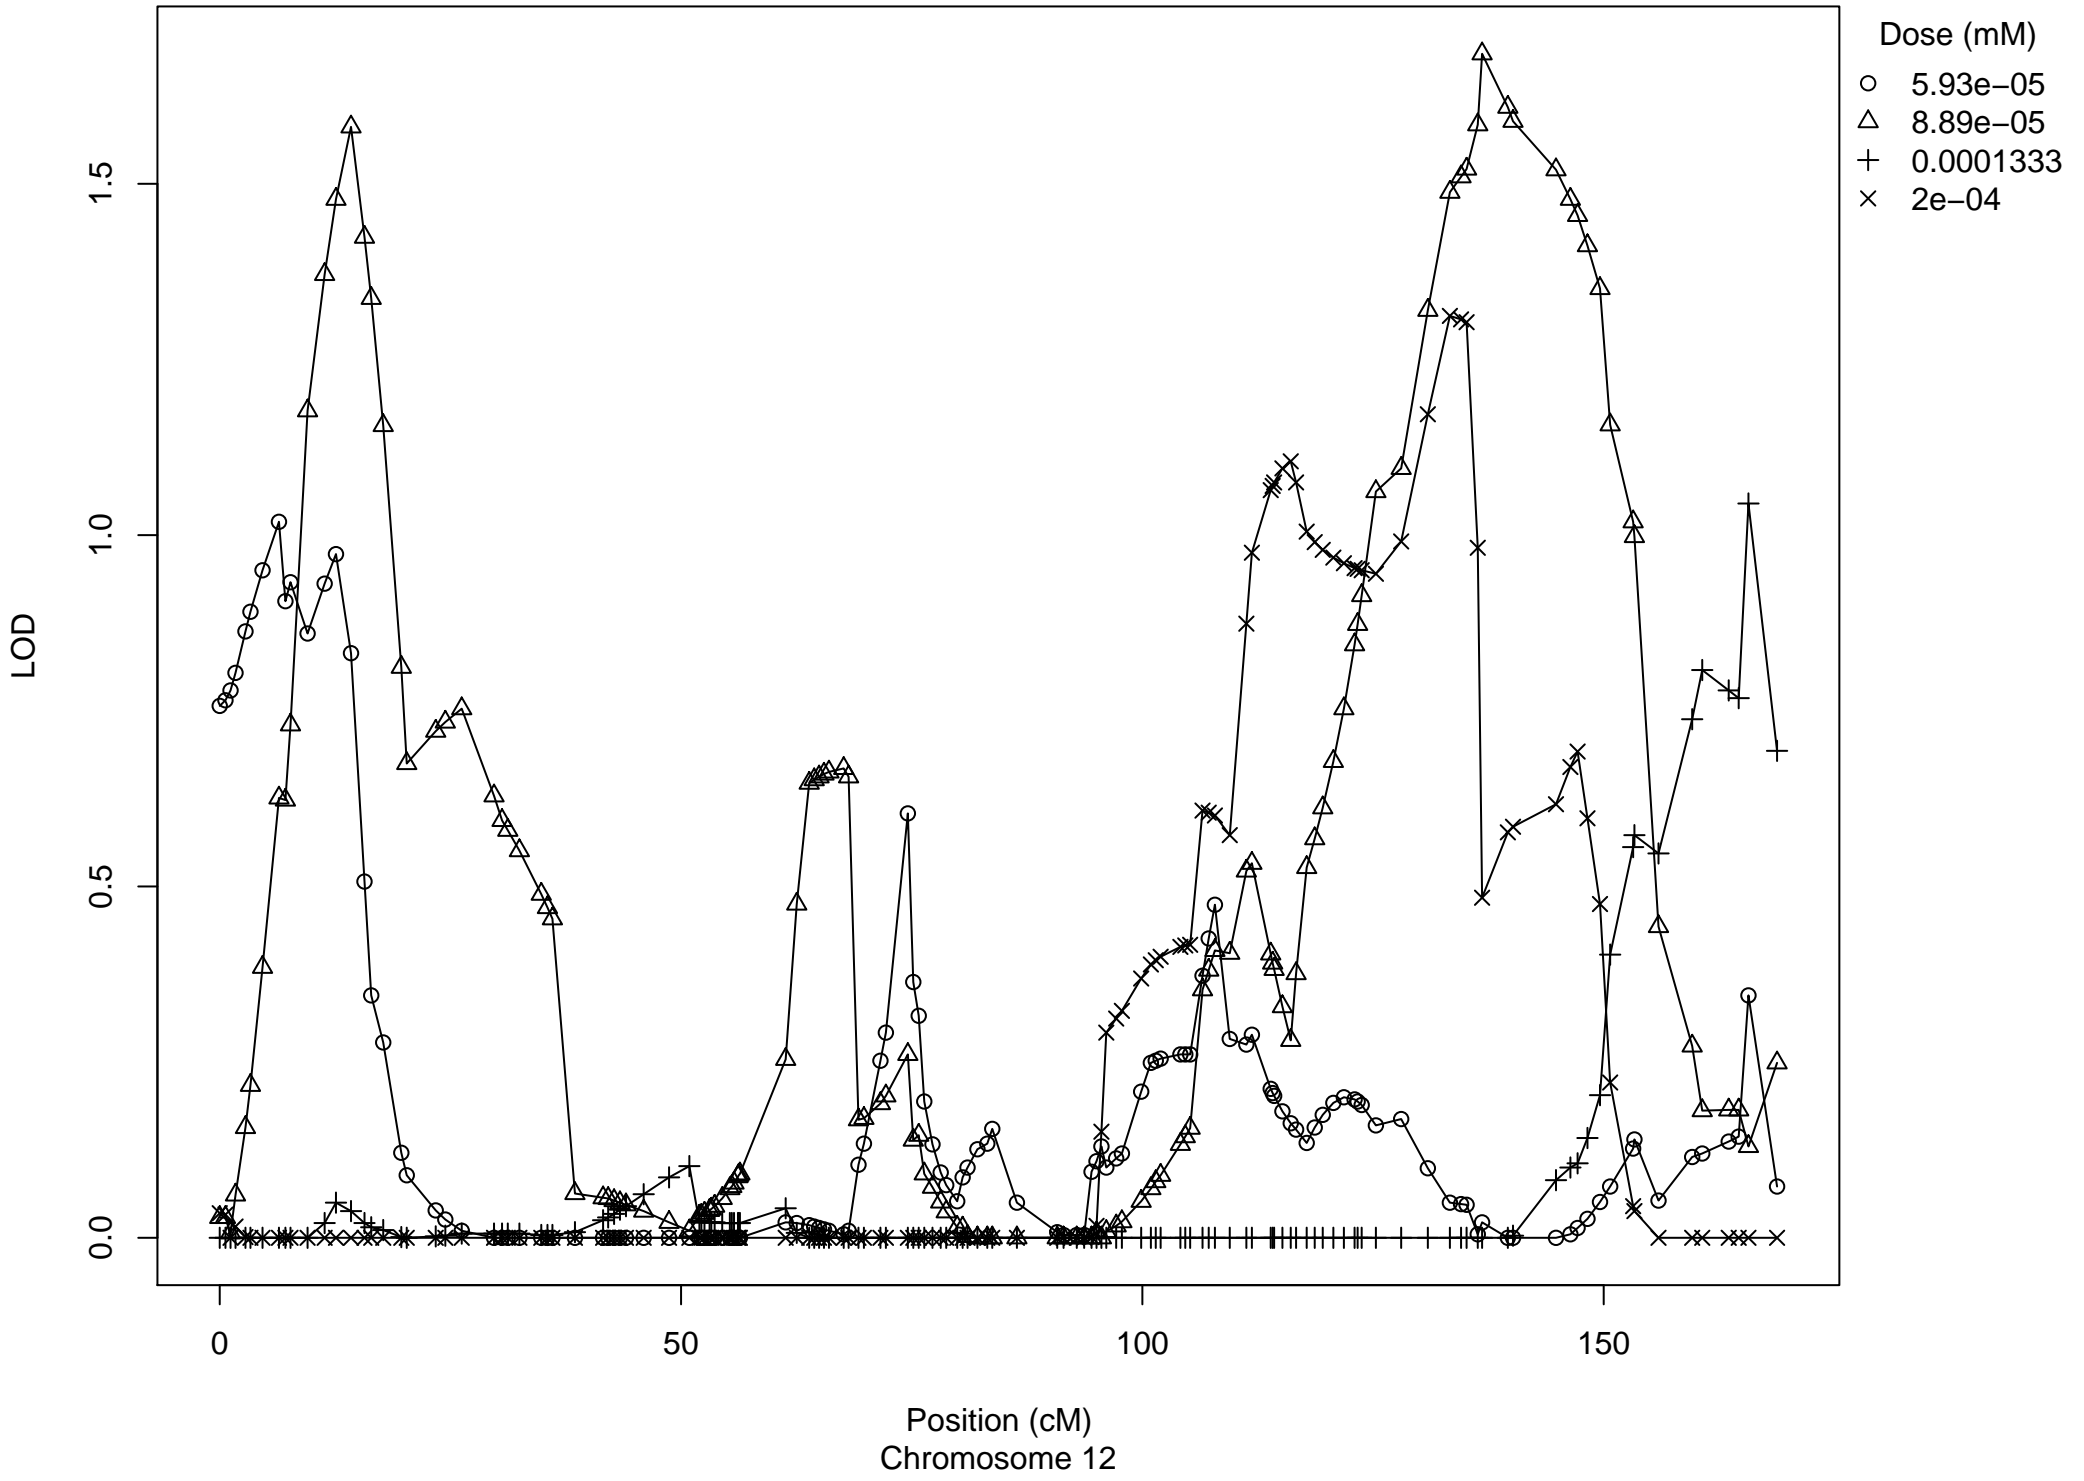

# Vinorelbine ditartrate salt hydrate (Vino)

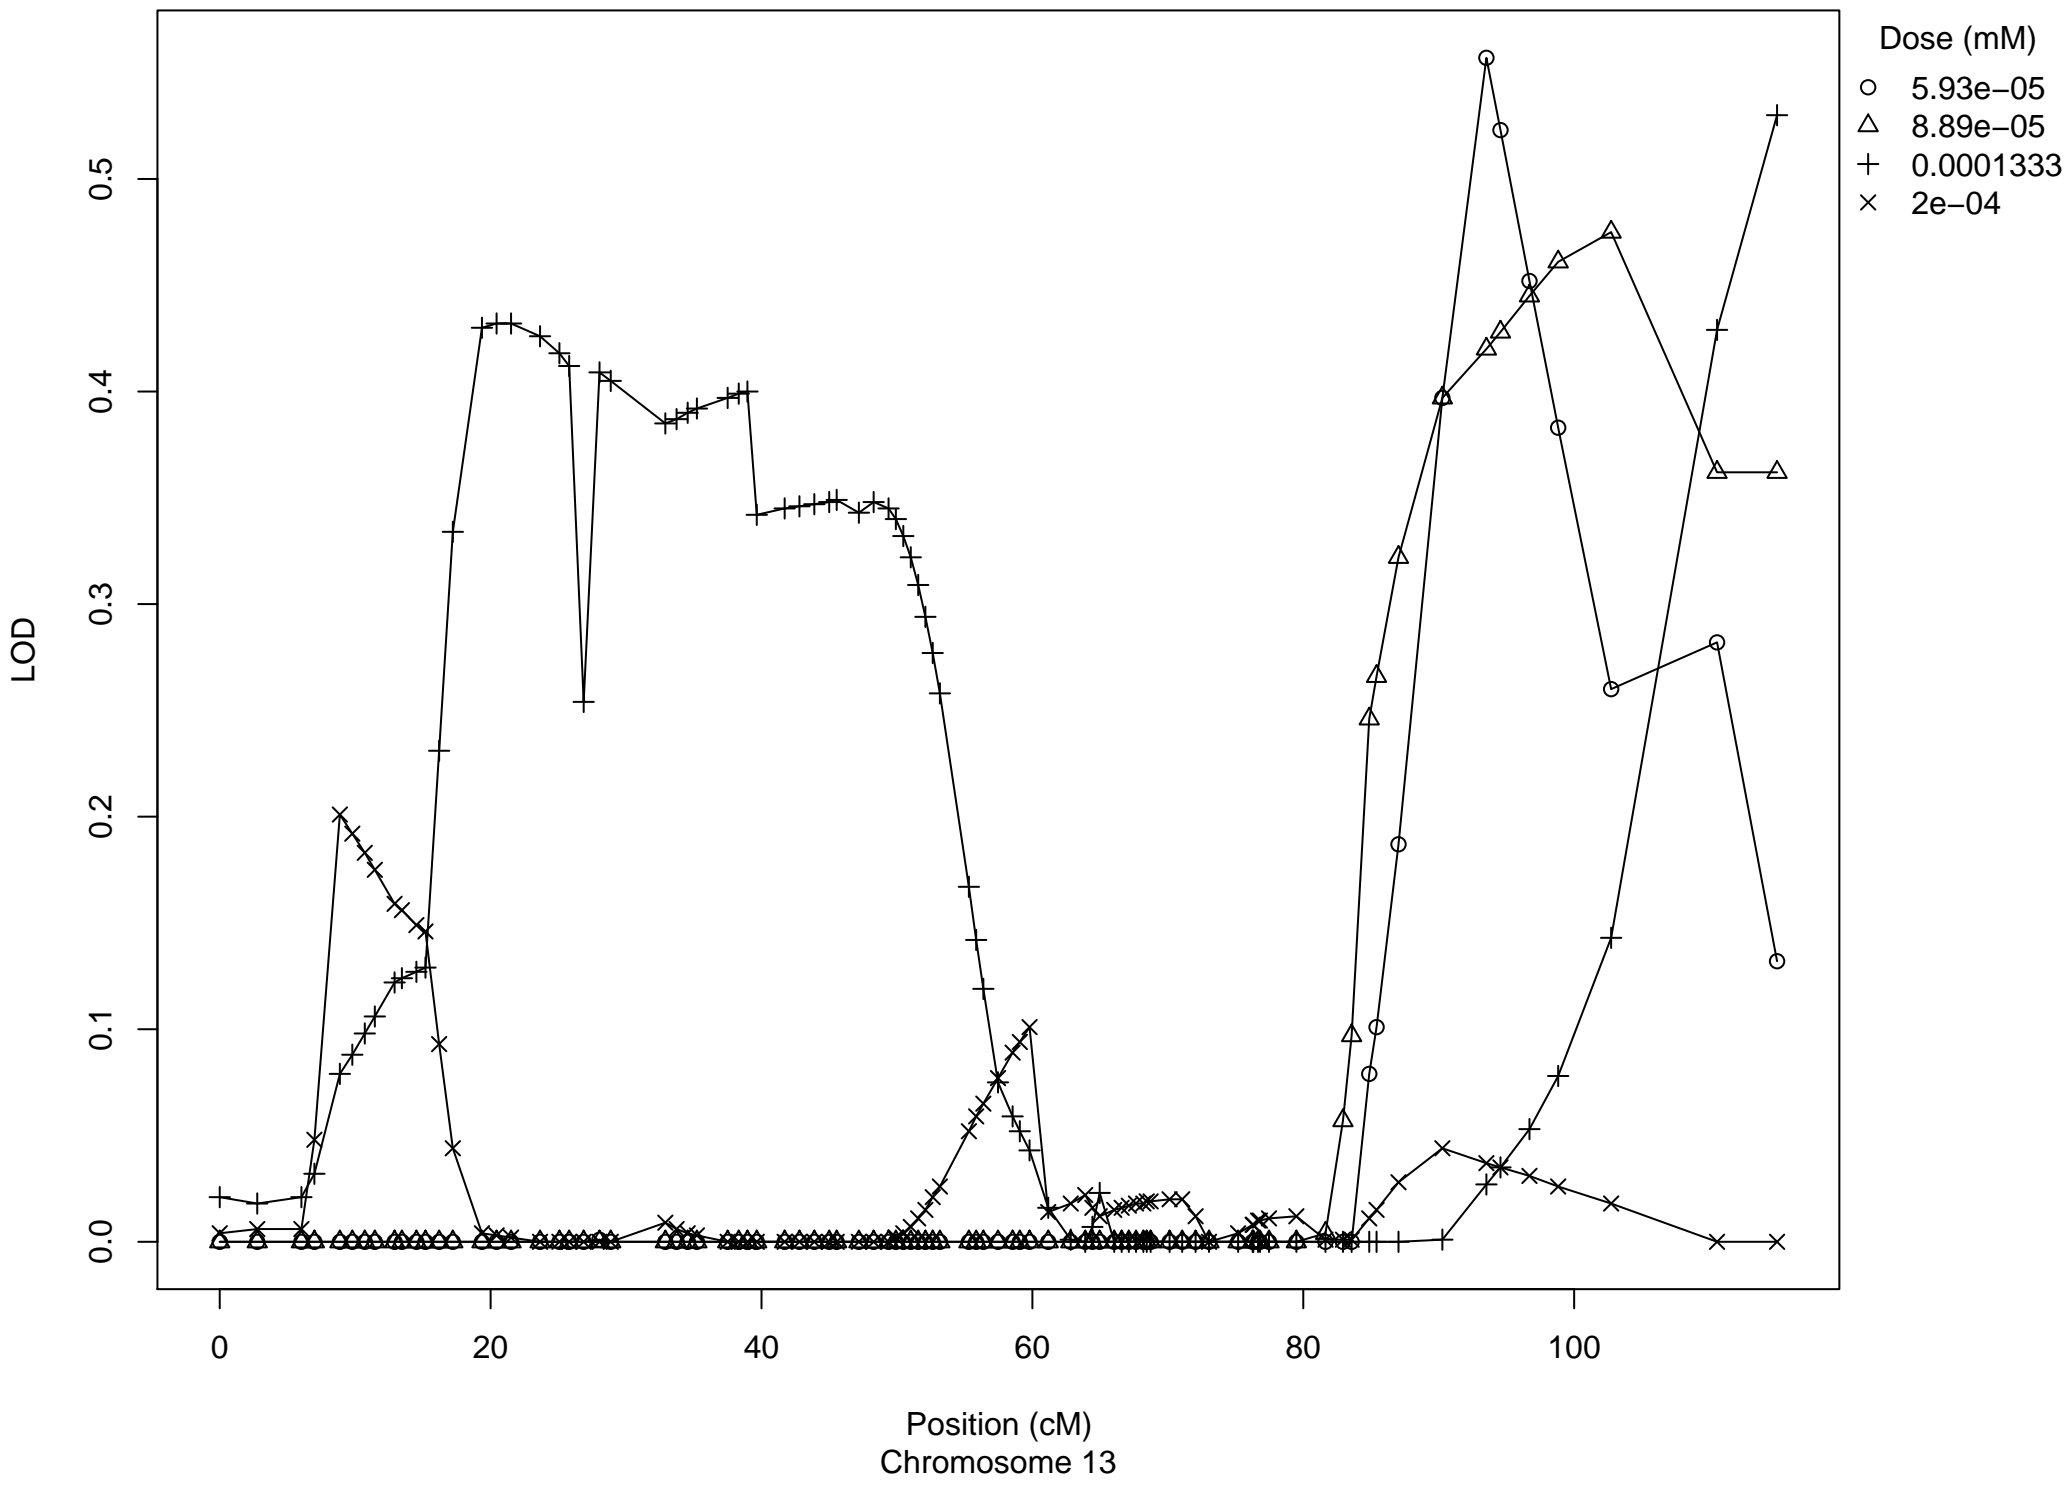

# Vinorelbine ditartrate salt hydrate (Vino)

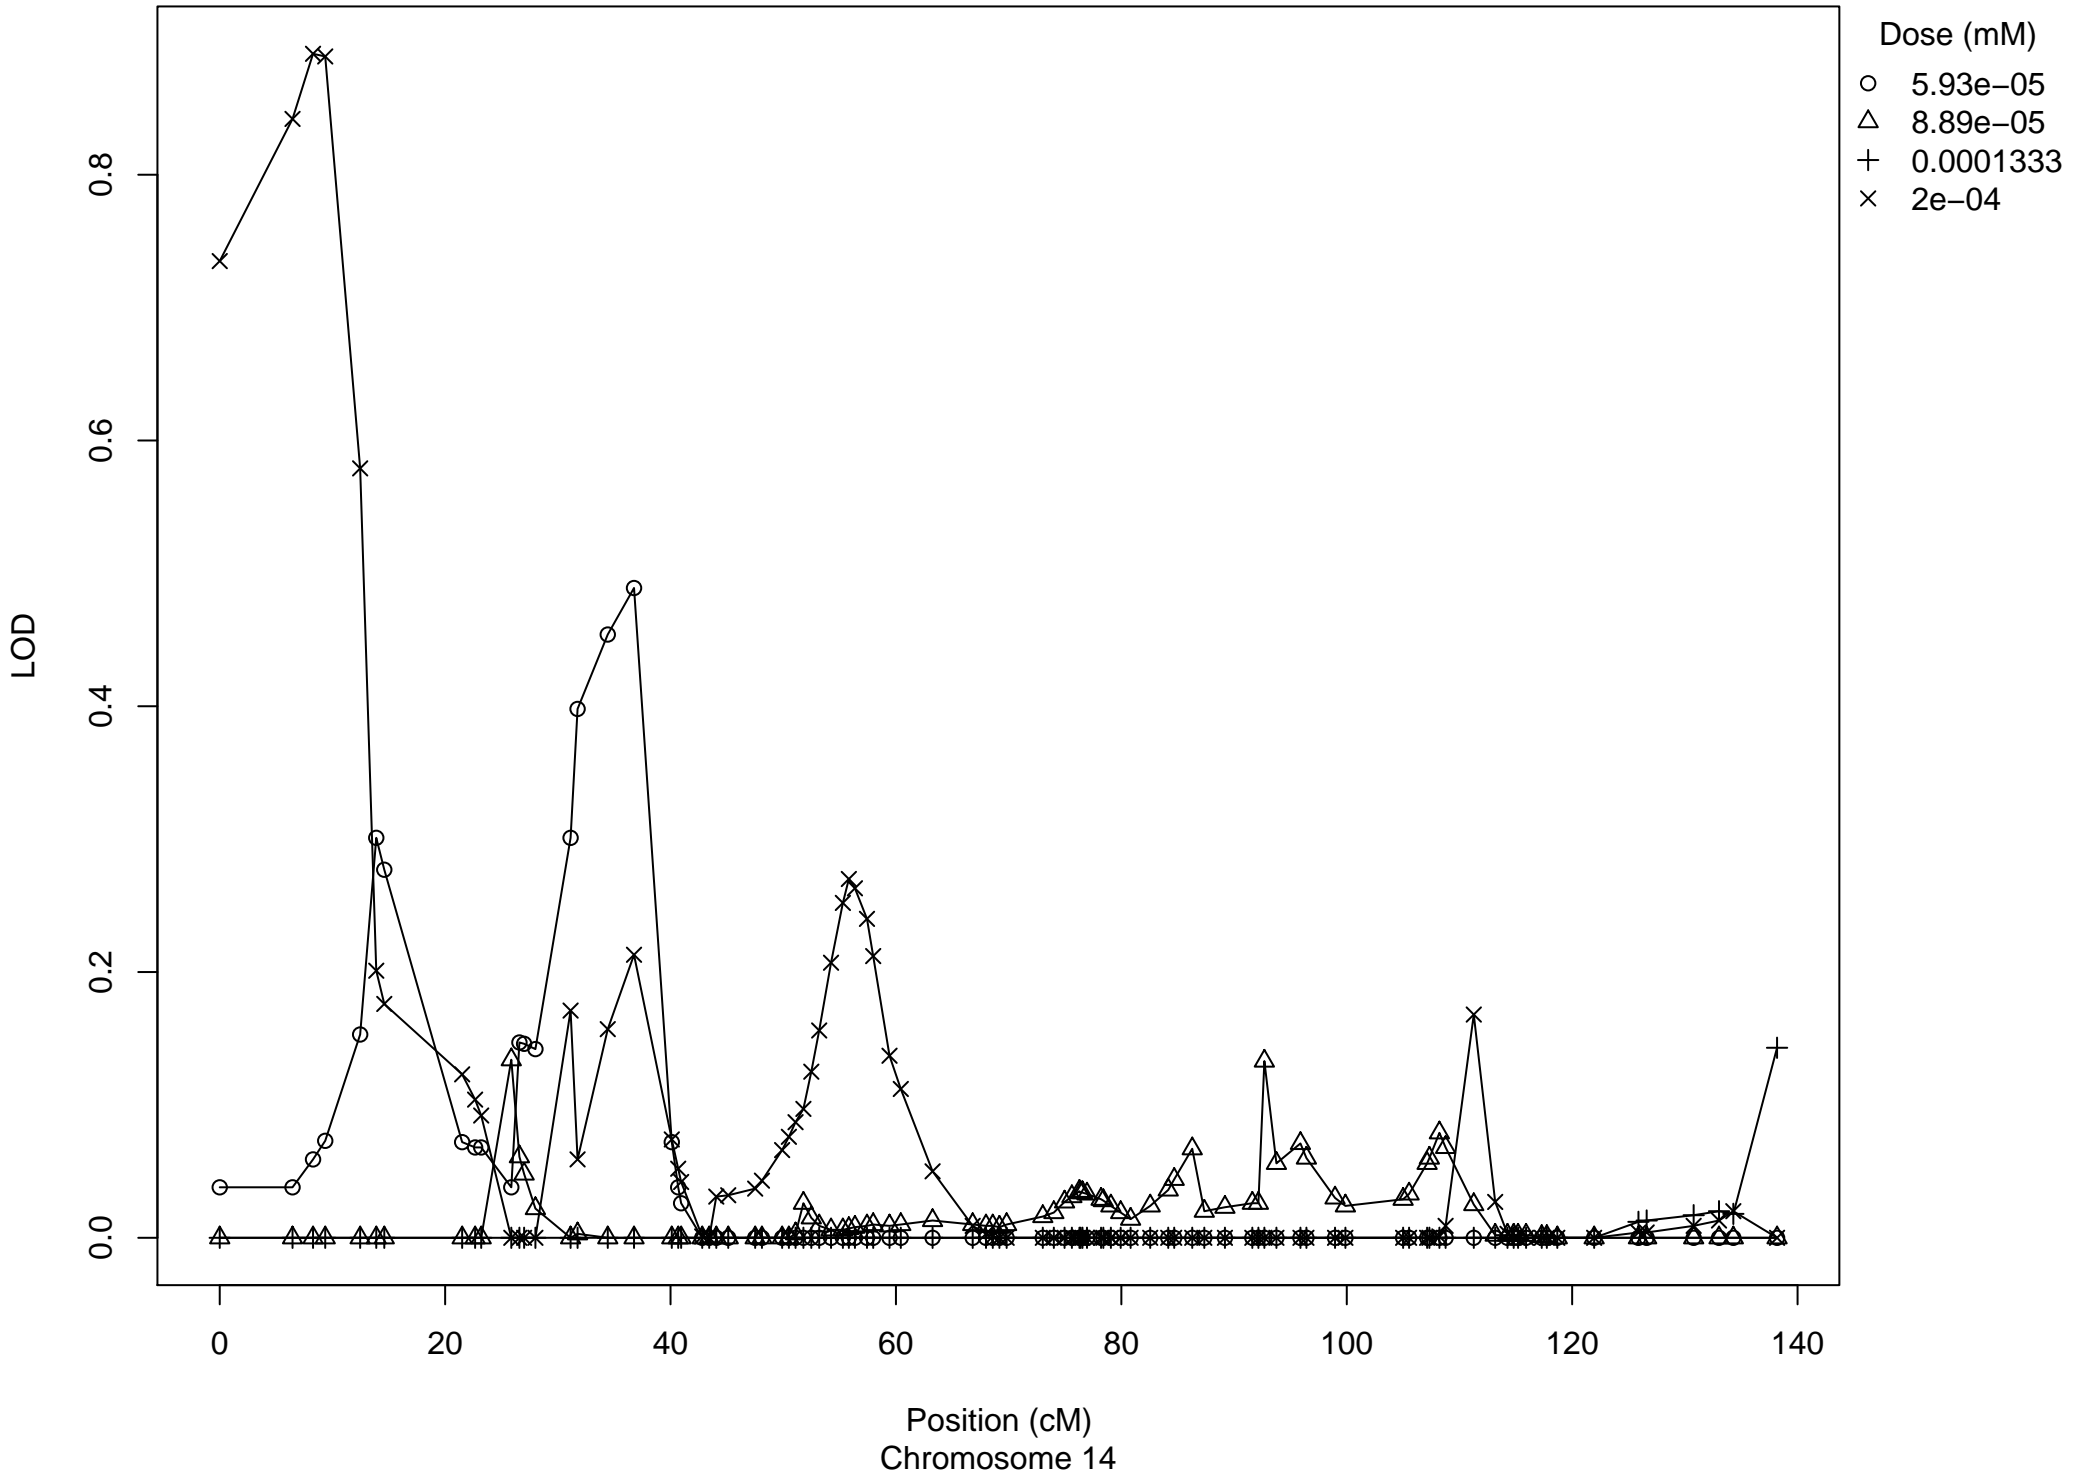

# Vinorelbine ditartrate salt hydrate (Vino)

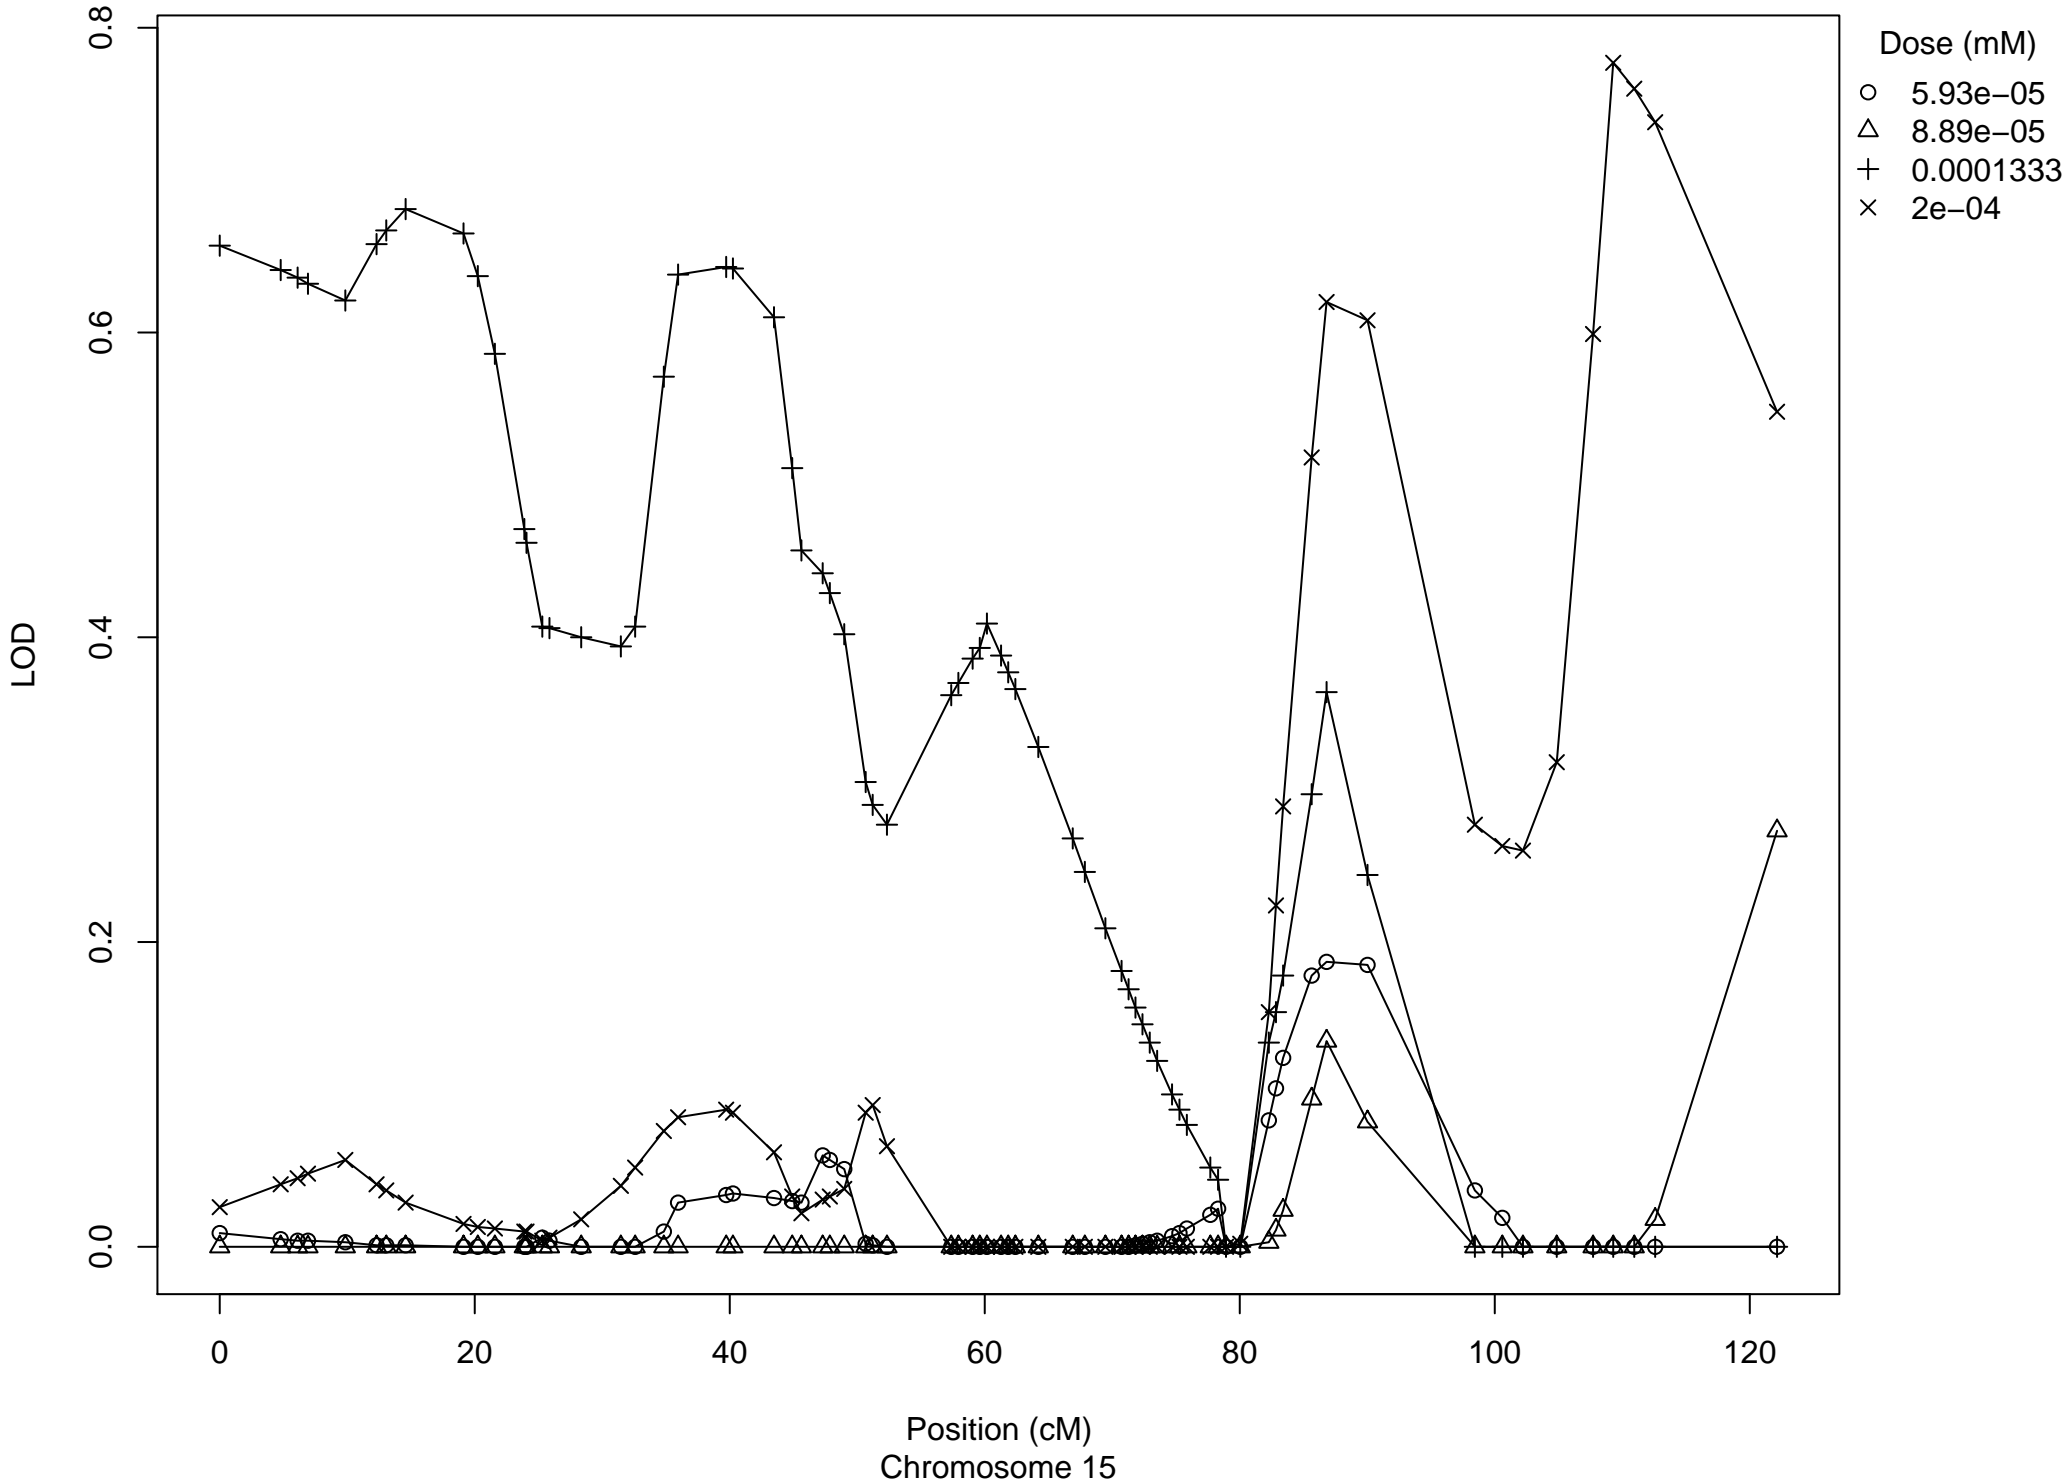

# Vinorelbine ditartrate salt hydrate (Vino)

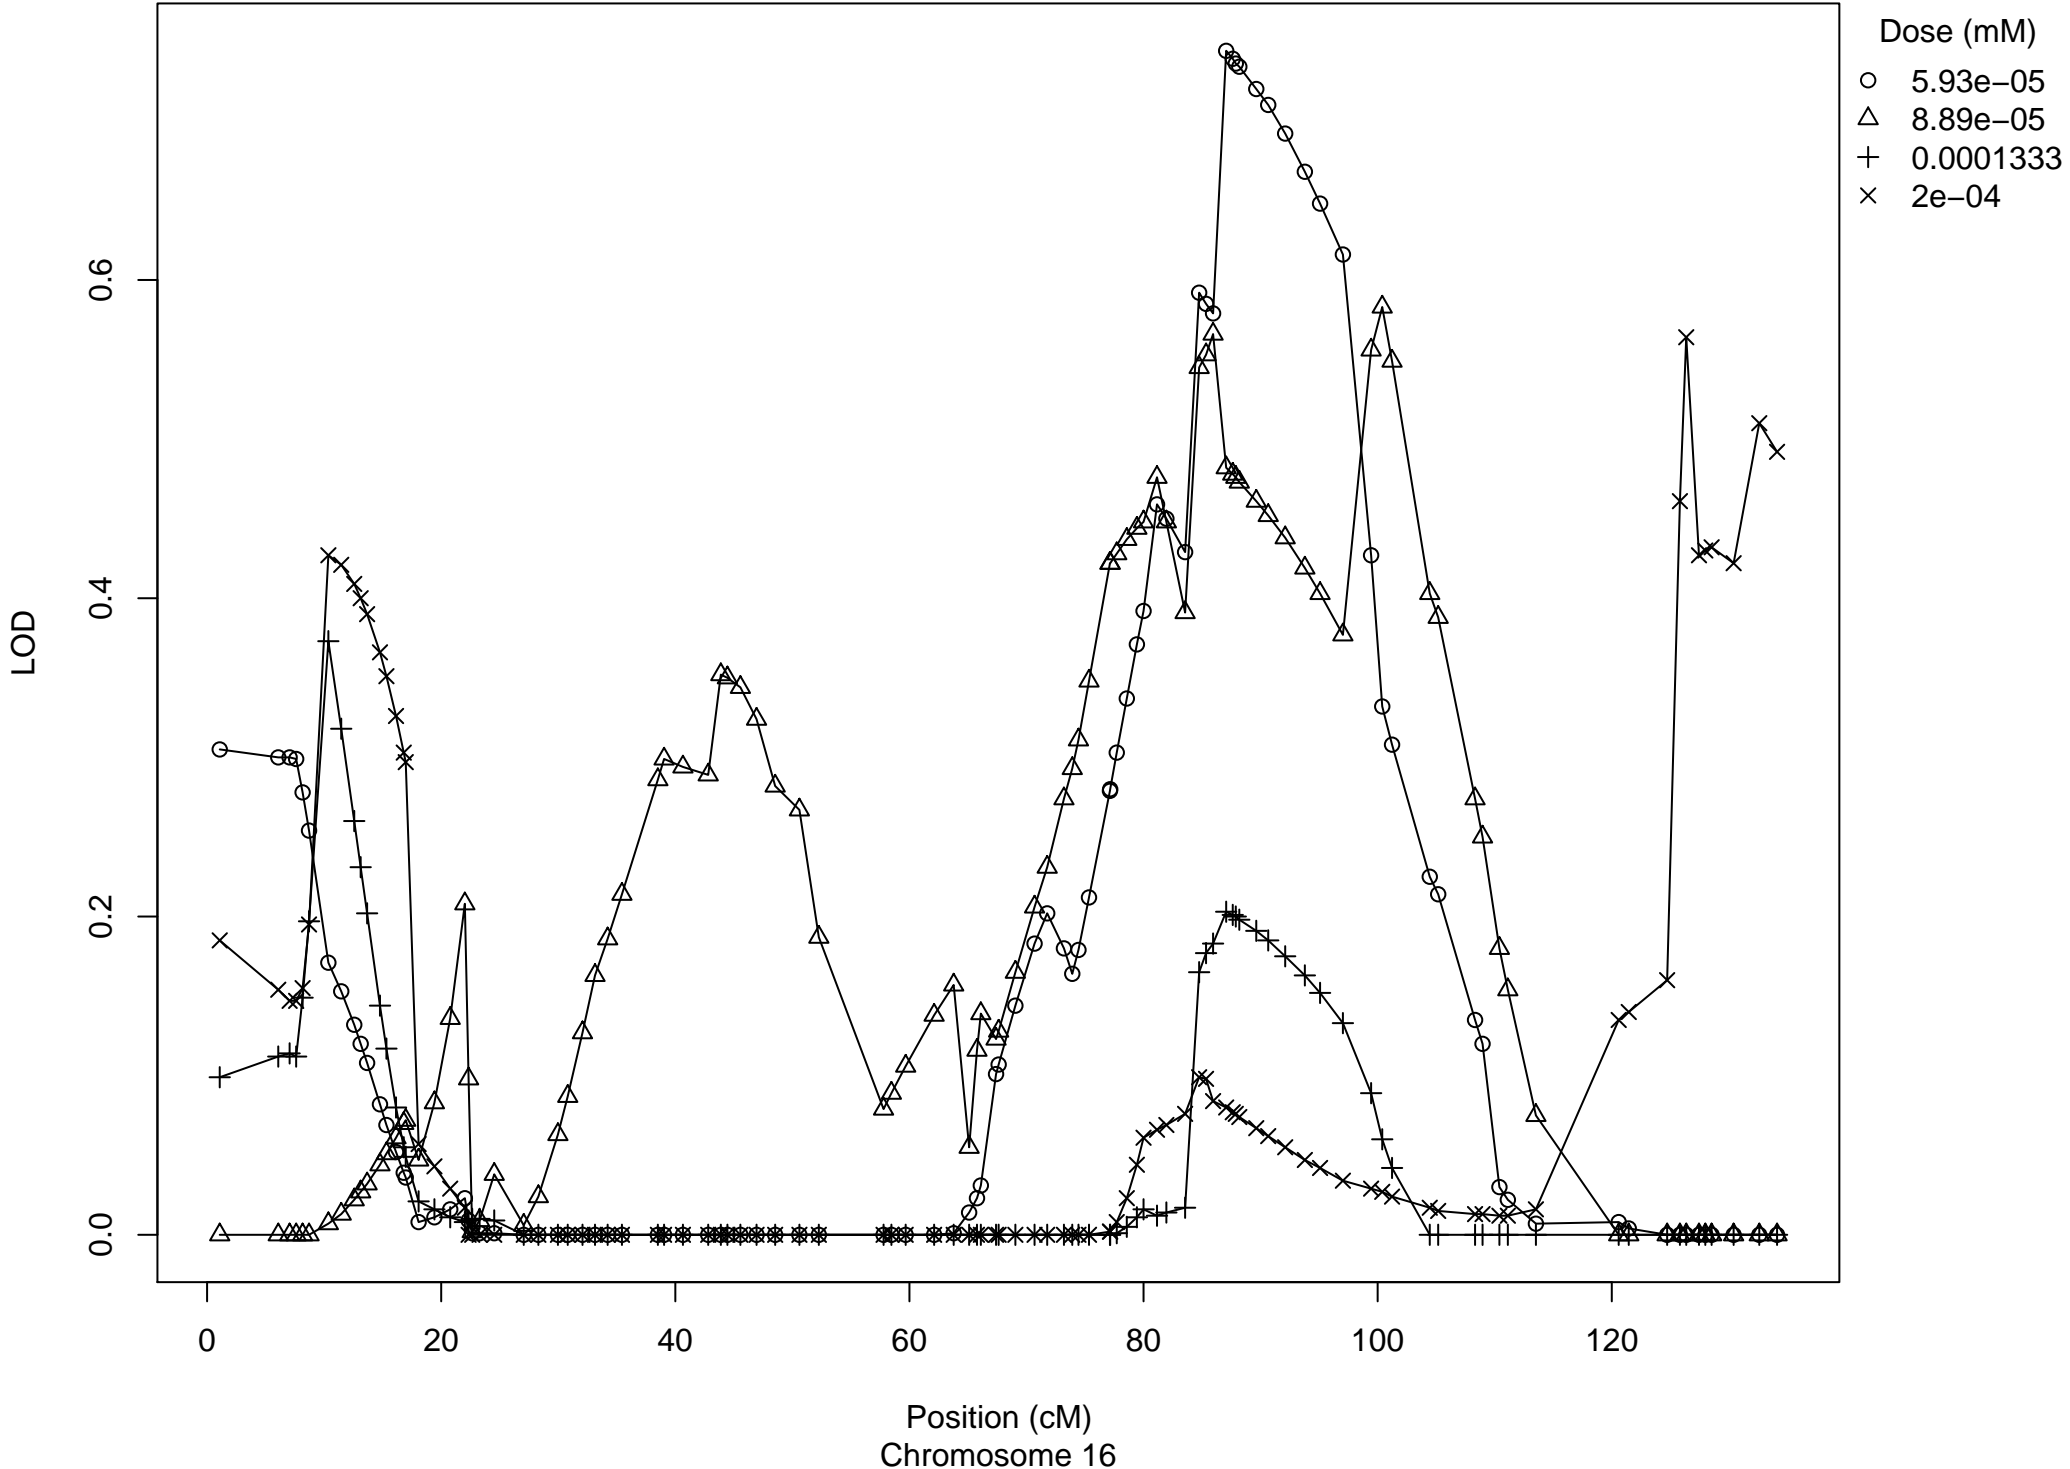



# Vinorelbine ditartrate salt hydrate (Vino)

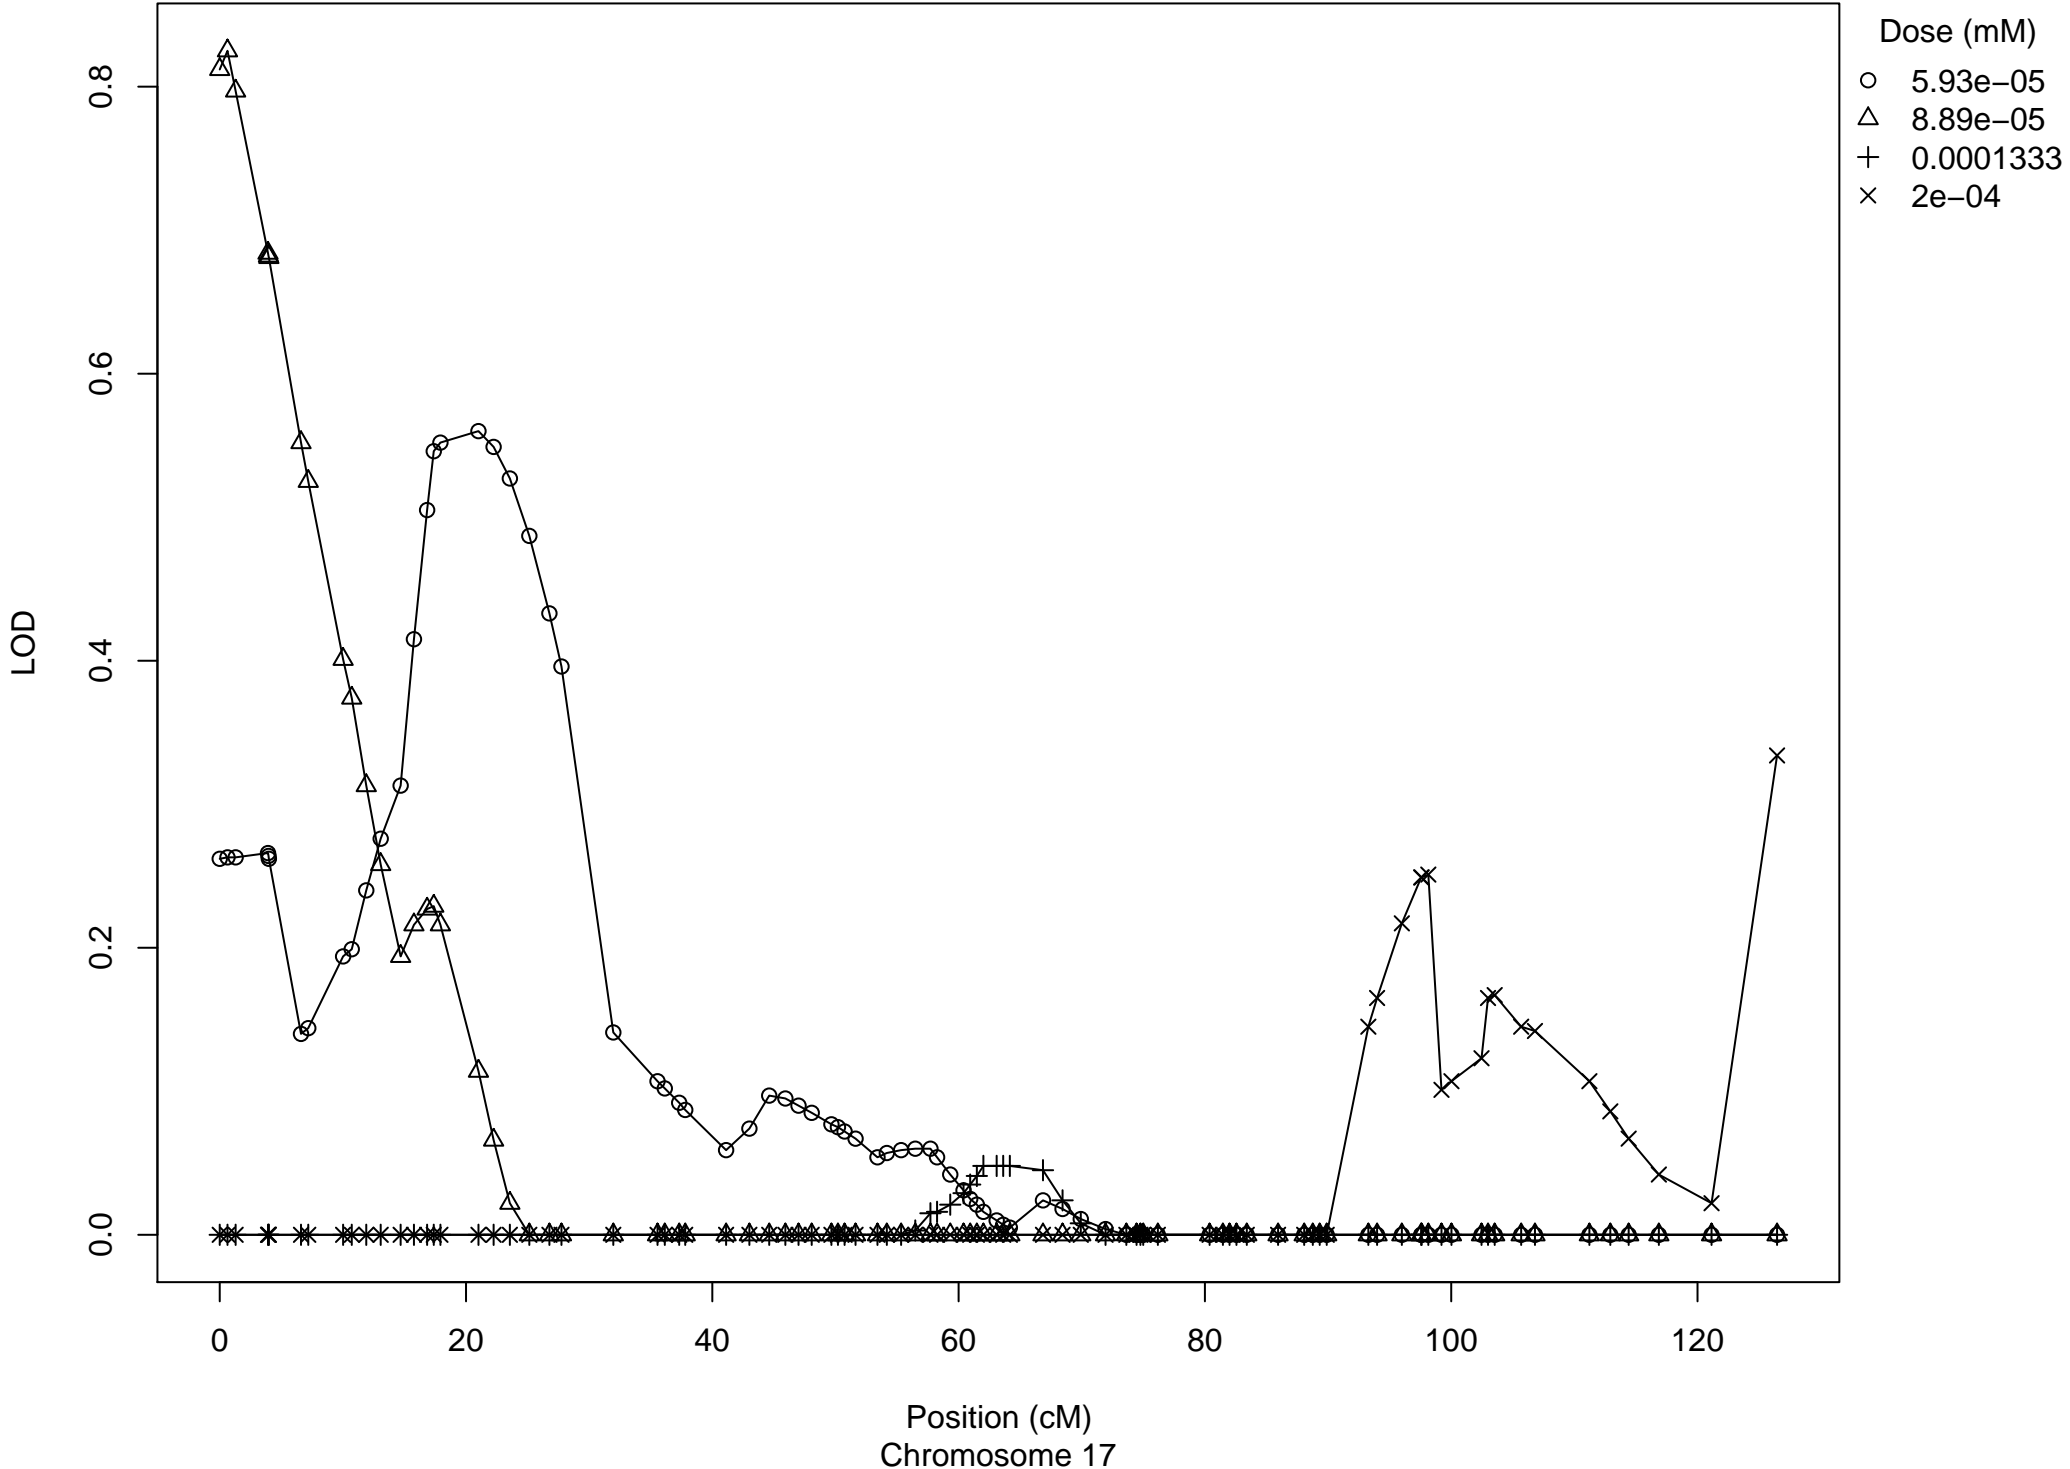

# Vinorelbine ditartrate salt hydrate (Vino)

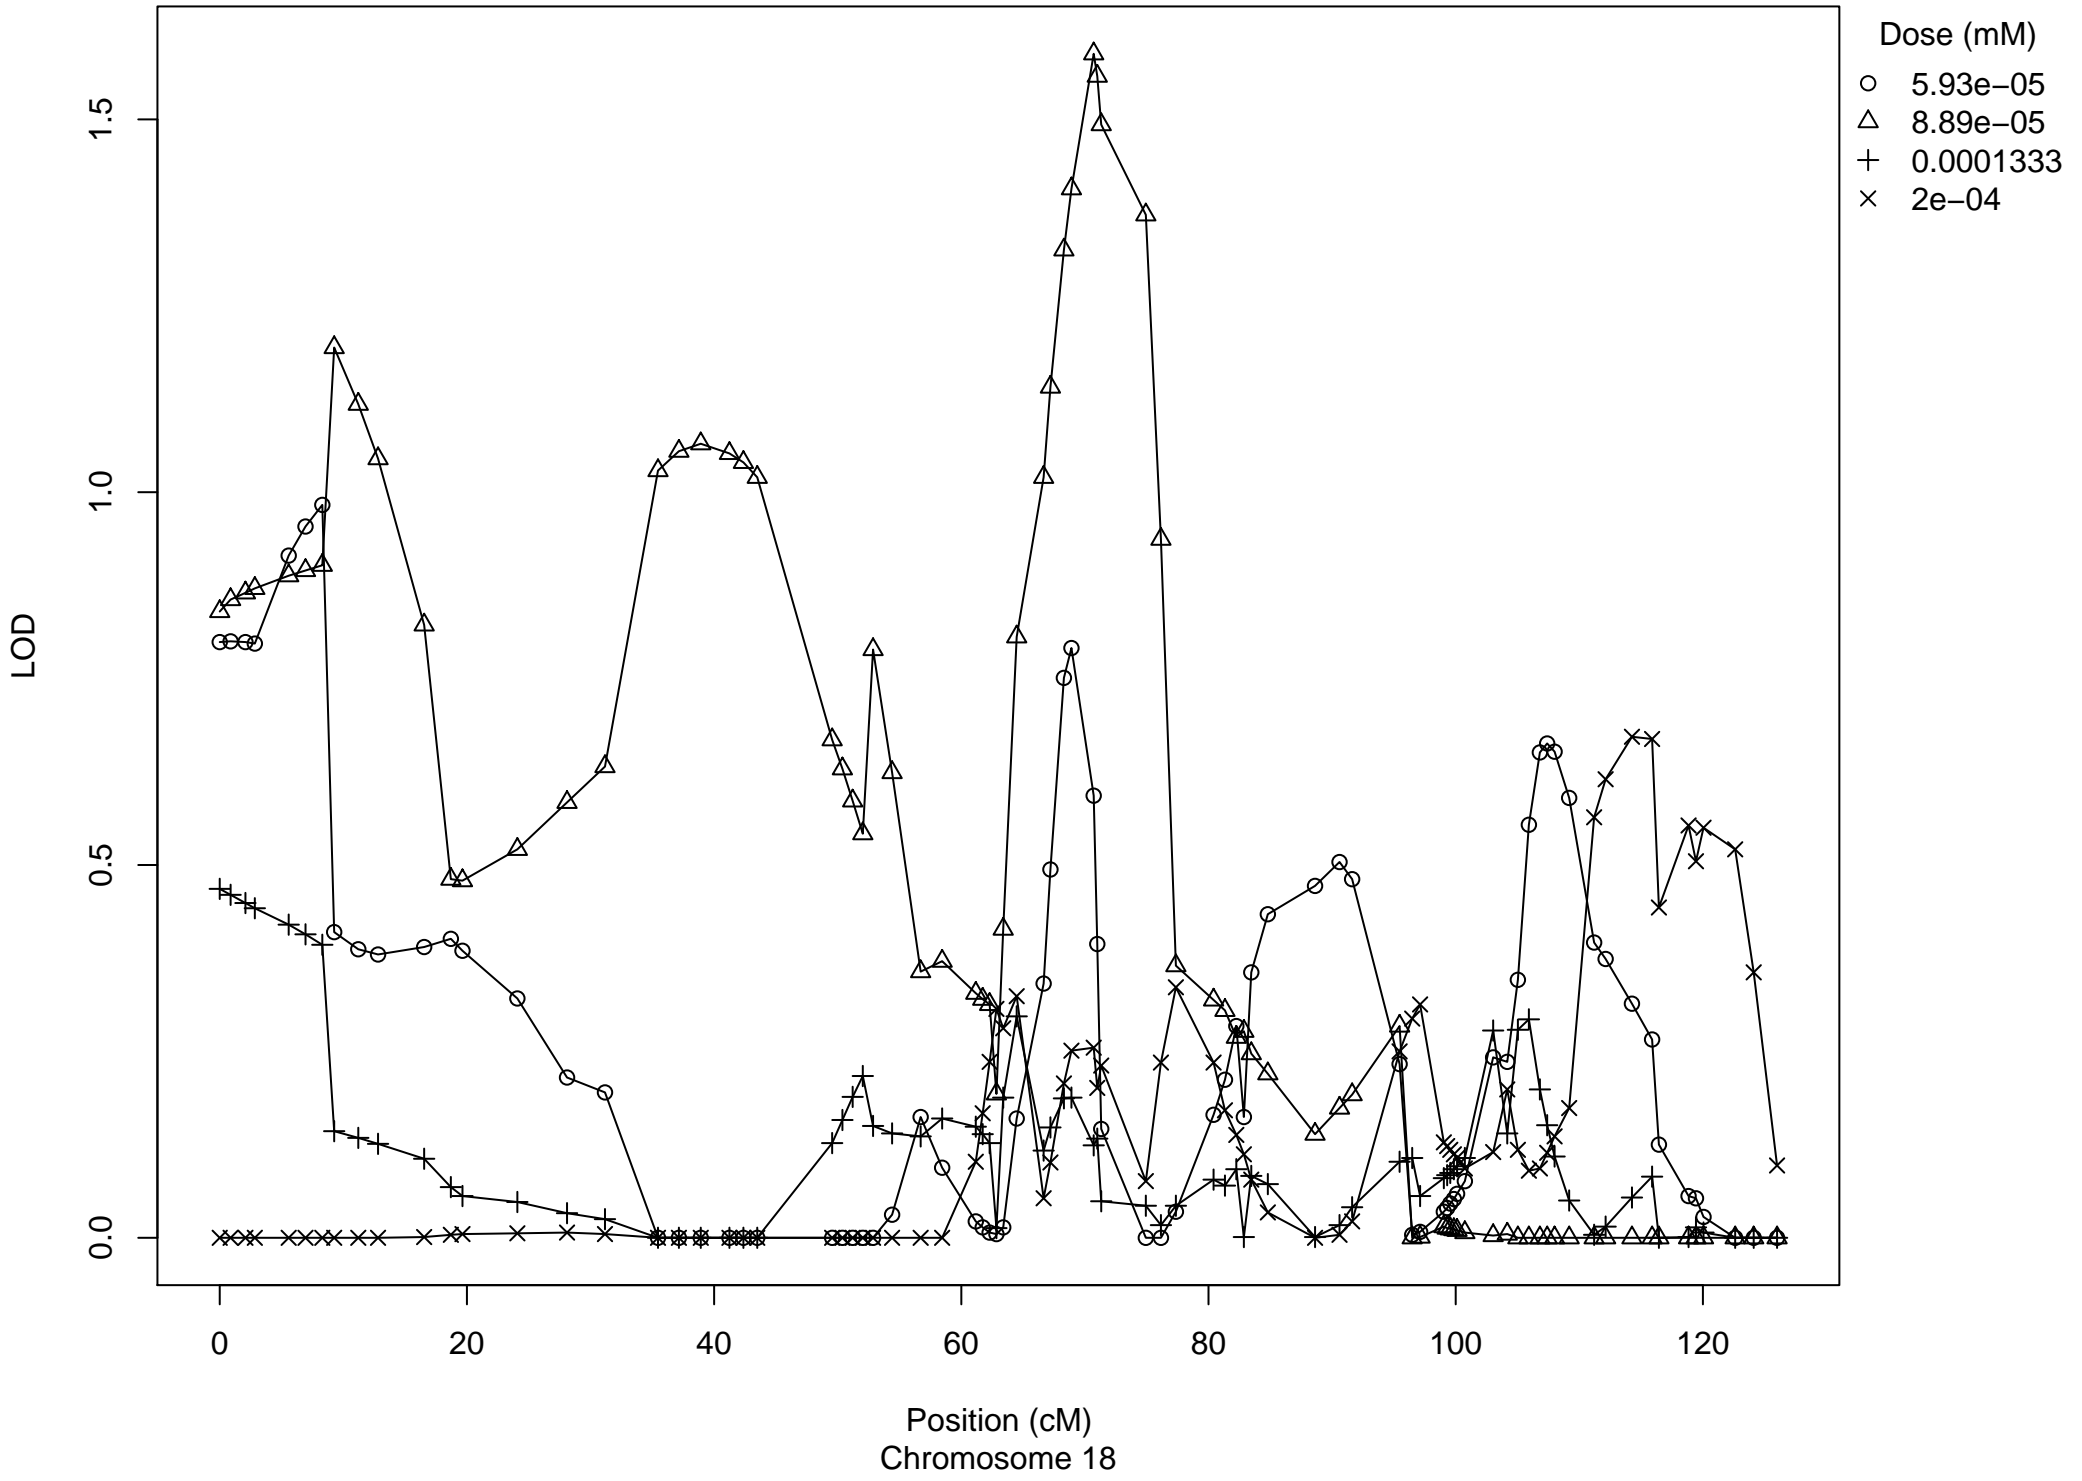

# Vinorelbine ditartrate salt hydrate (Vino)

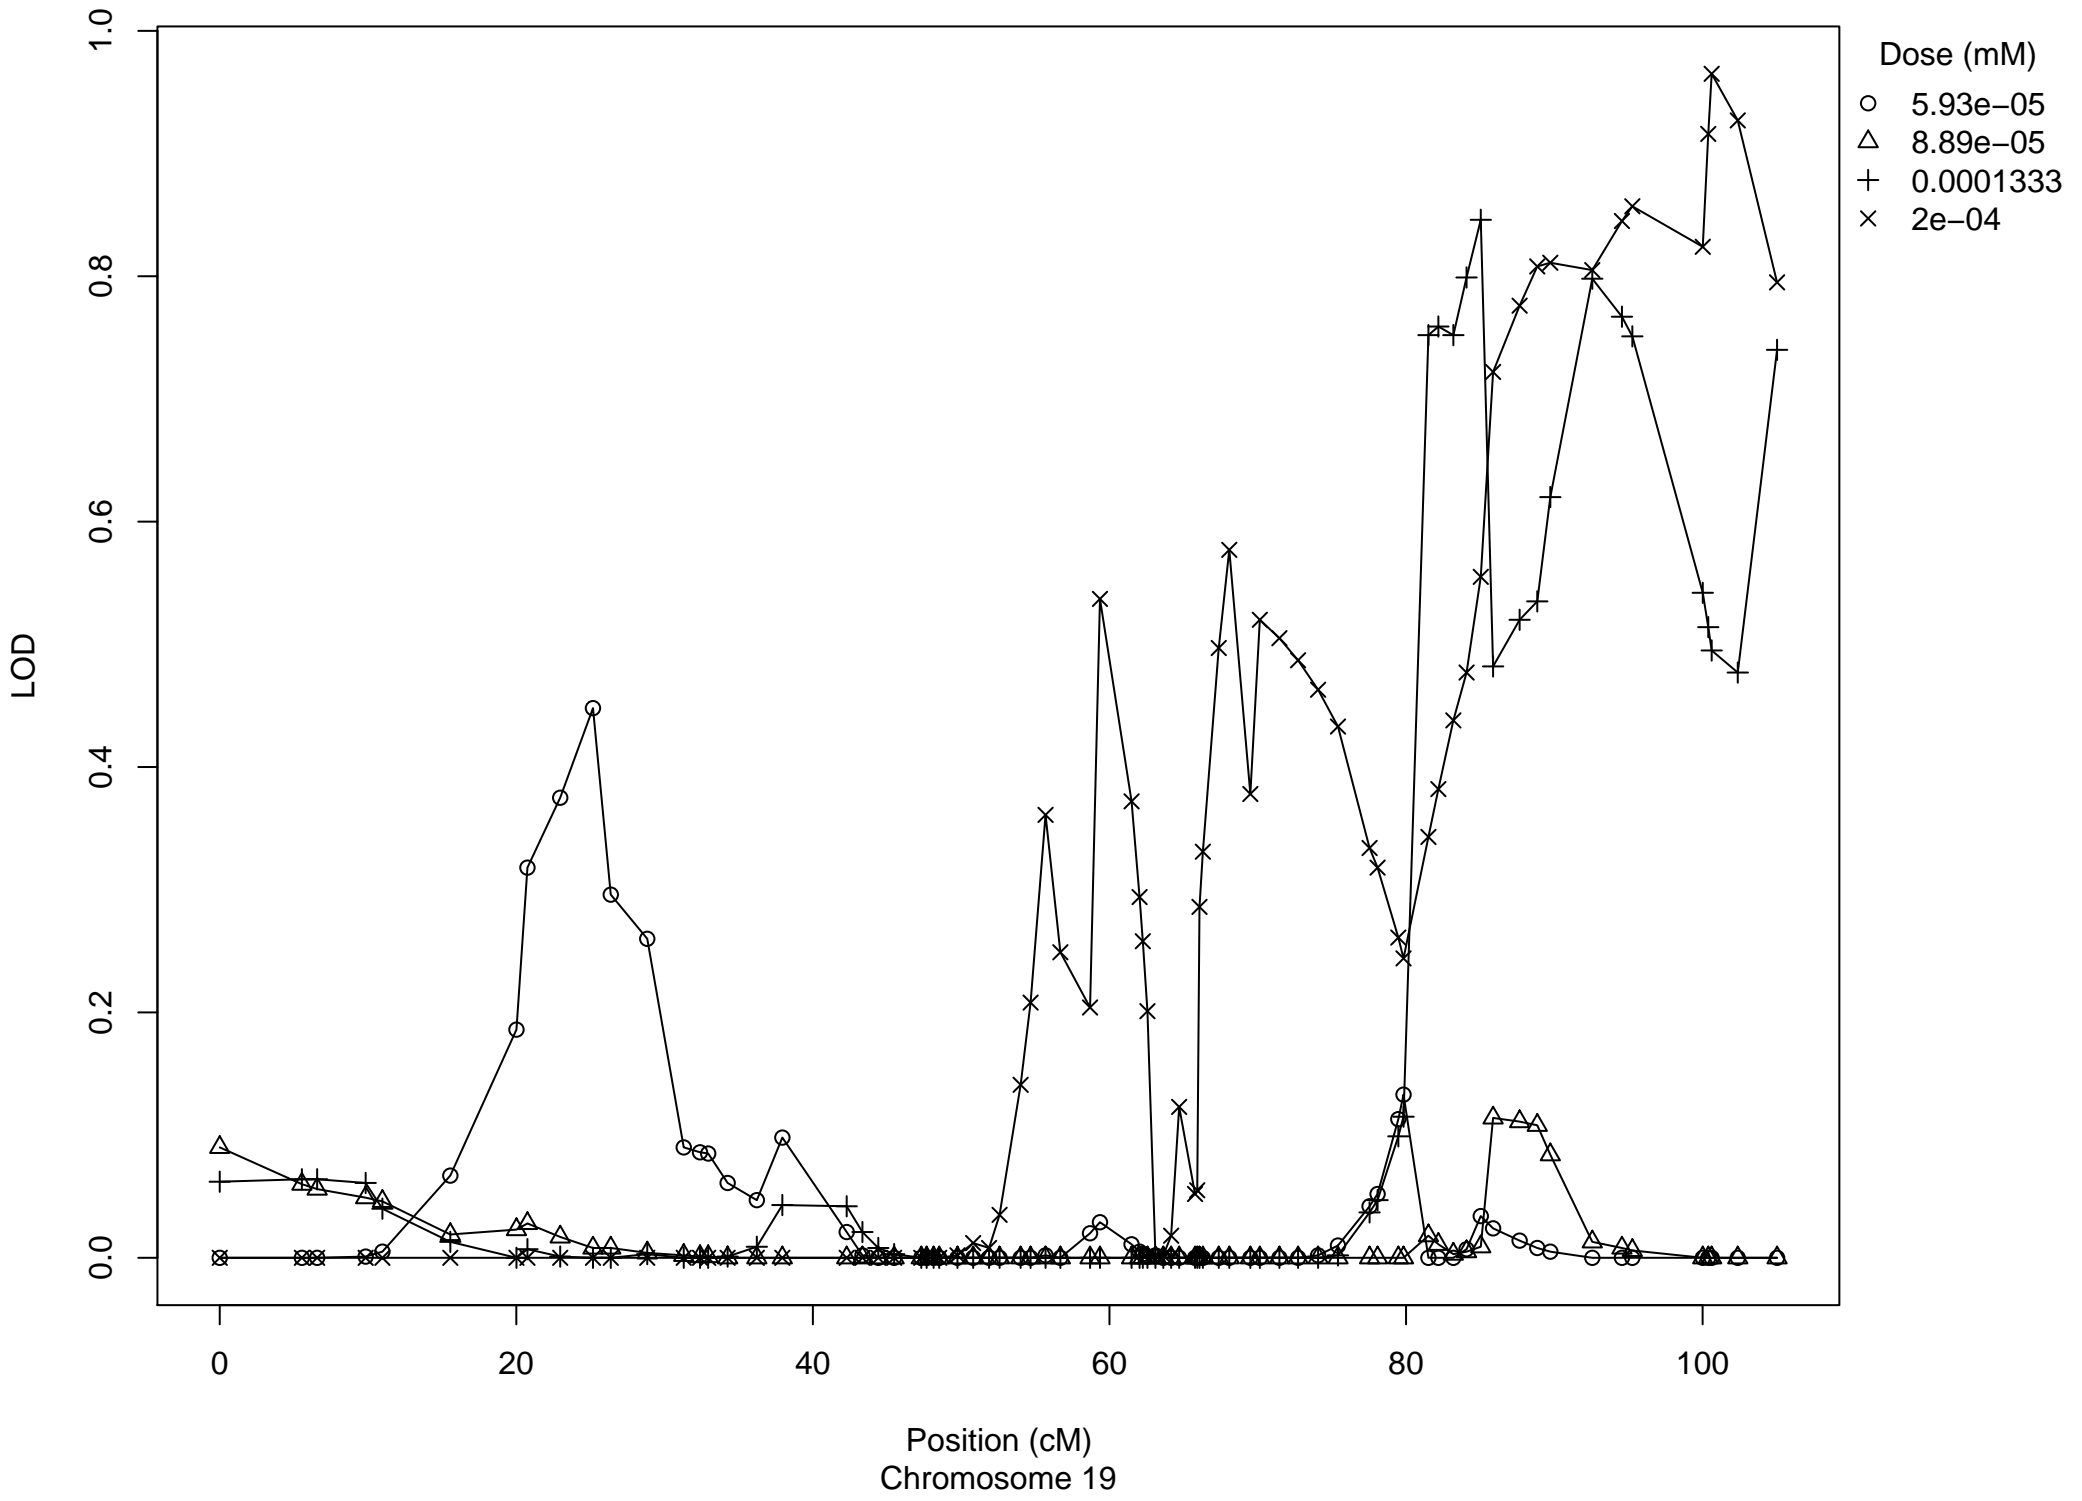

# Vinorelbine ditartrate salt hydrate (Vino)

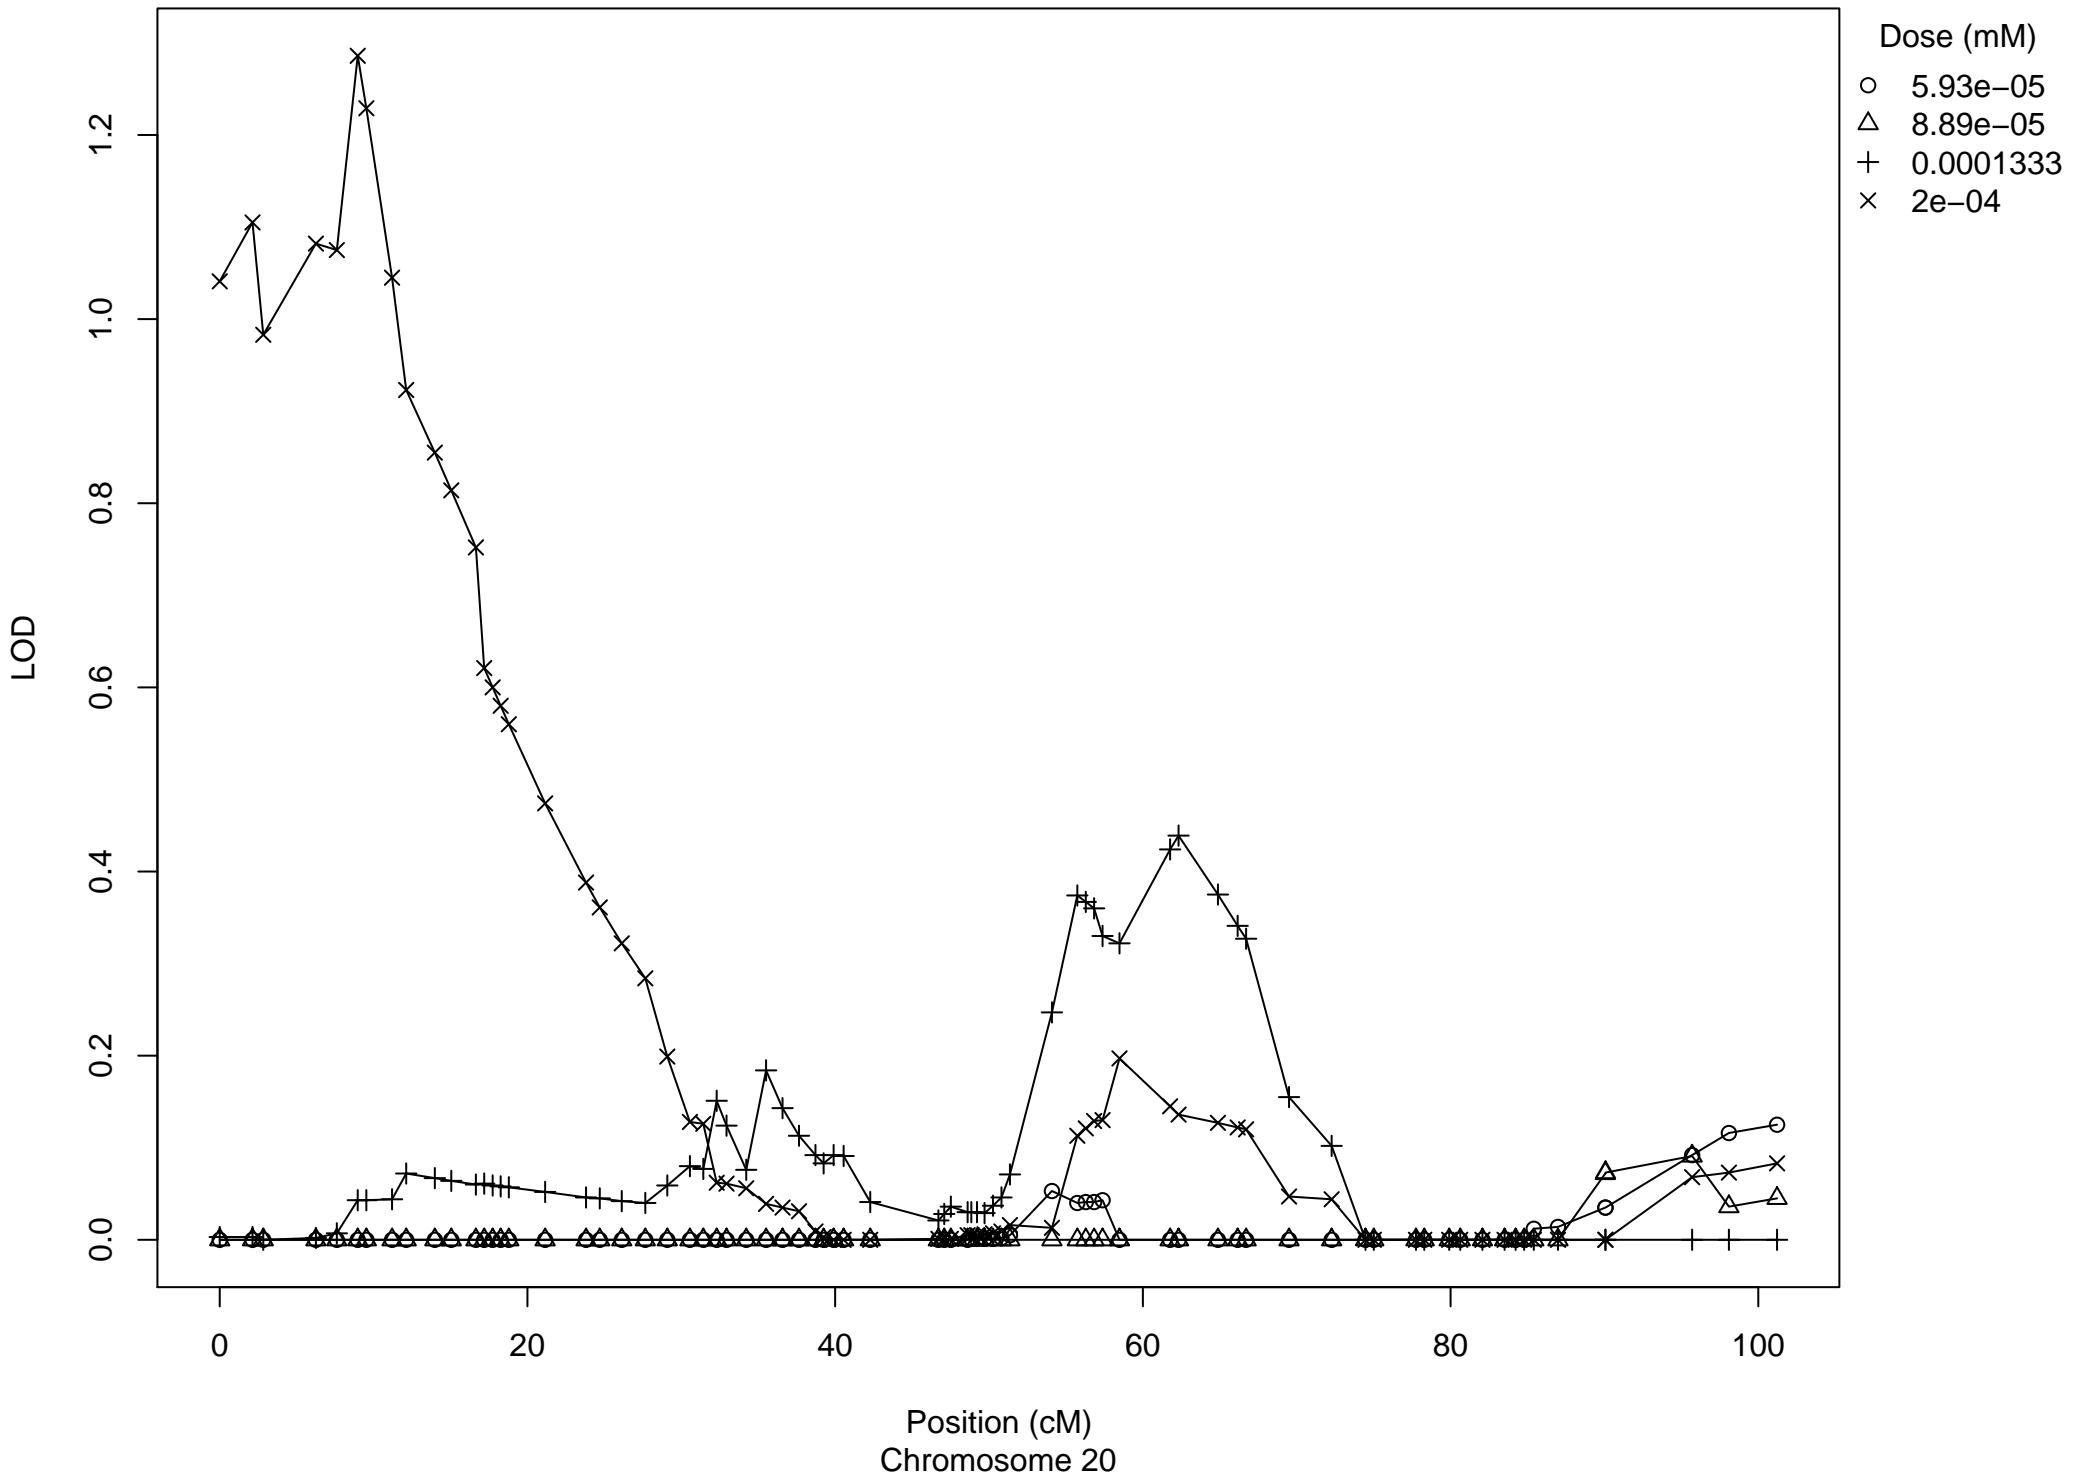

# Vinorelbine ditartrate salt hydrate (Vino)

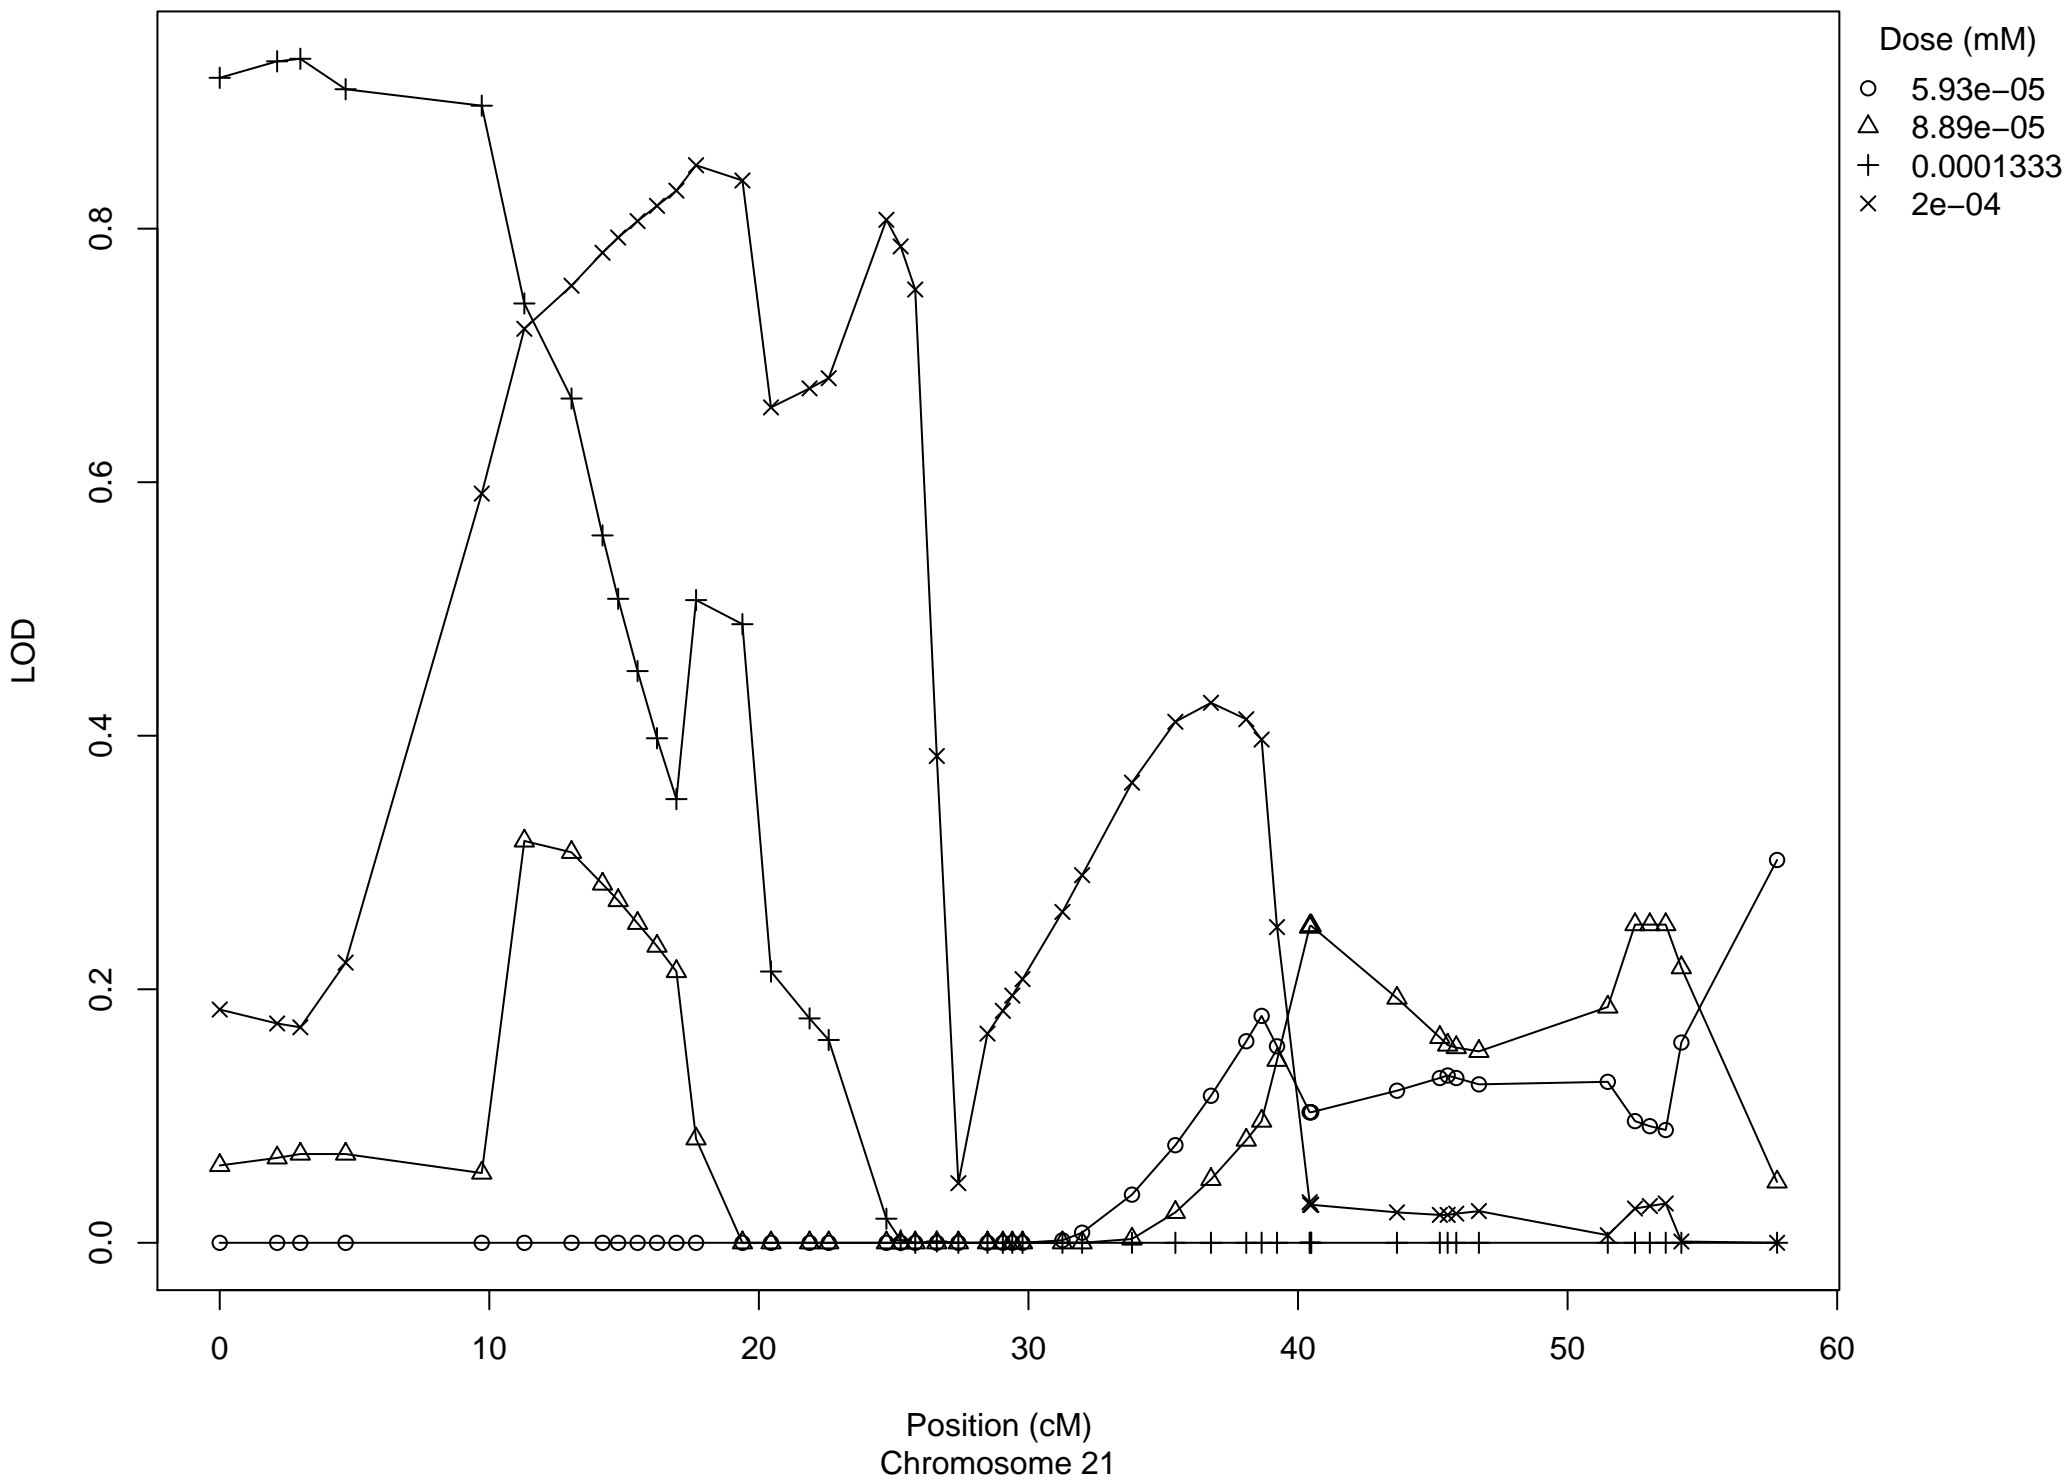

# Vinorelbine ditartrate salt hydrate (Vino)

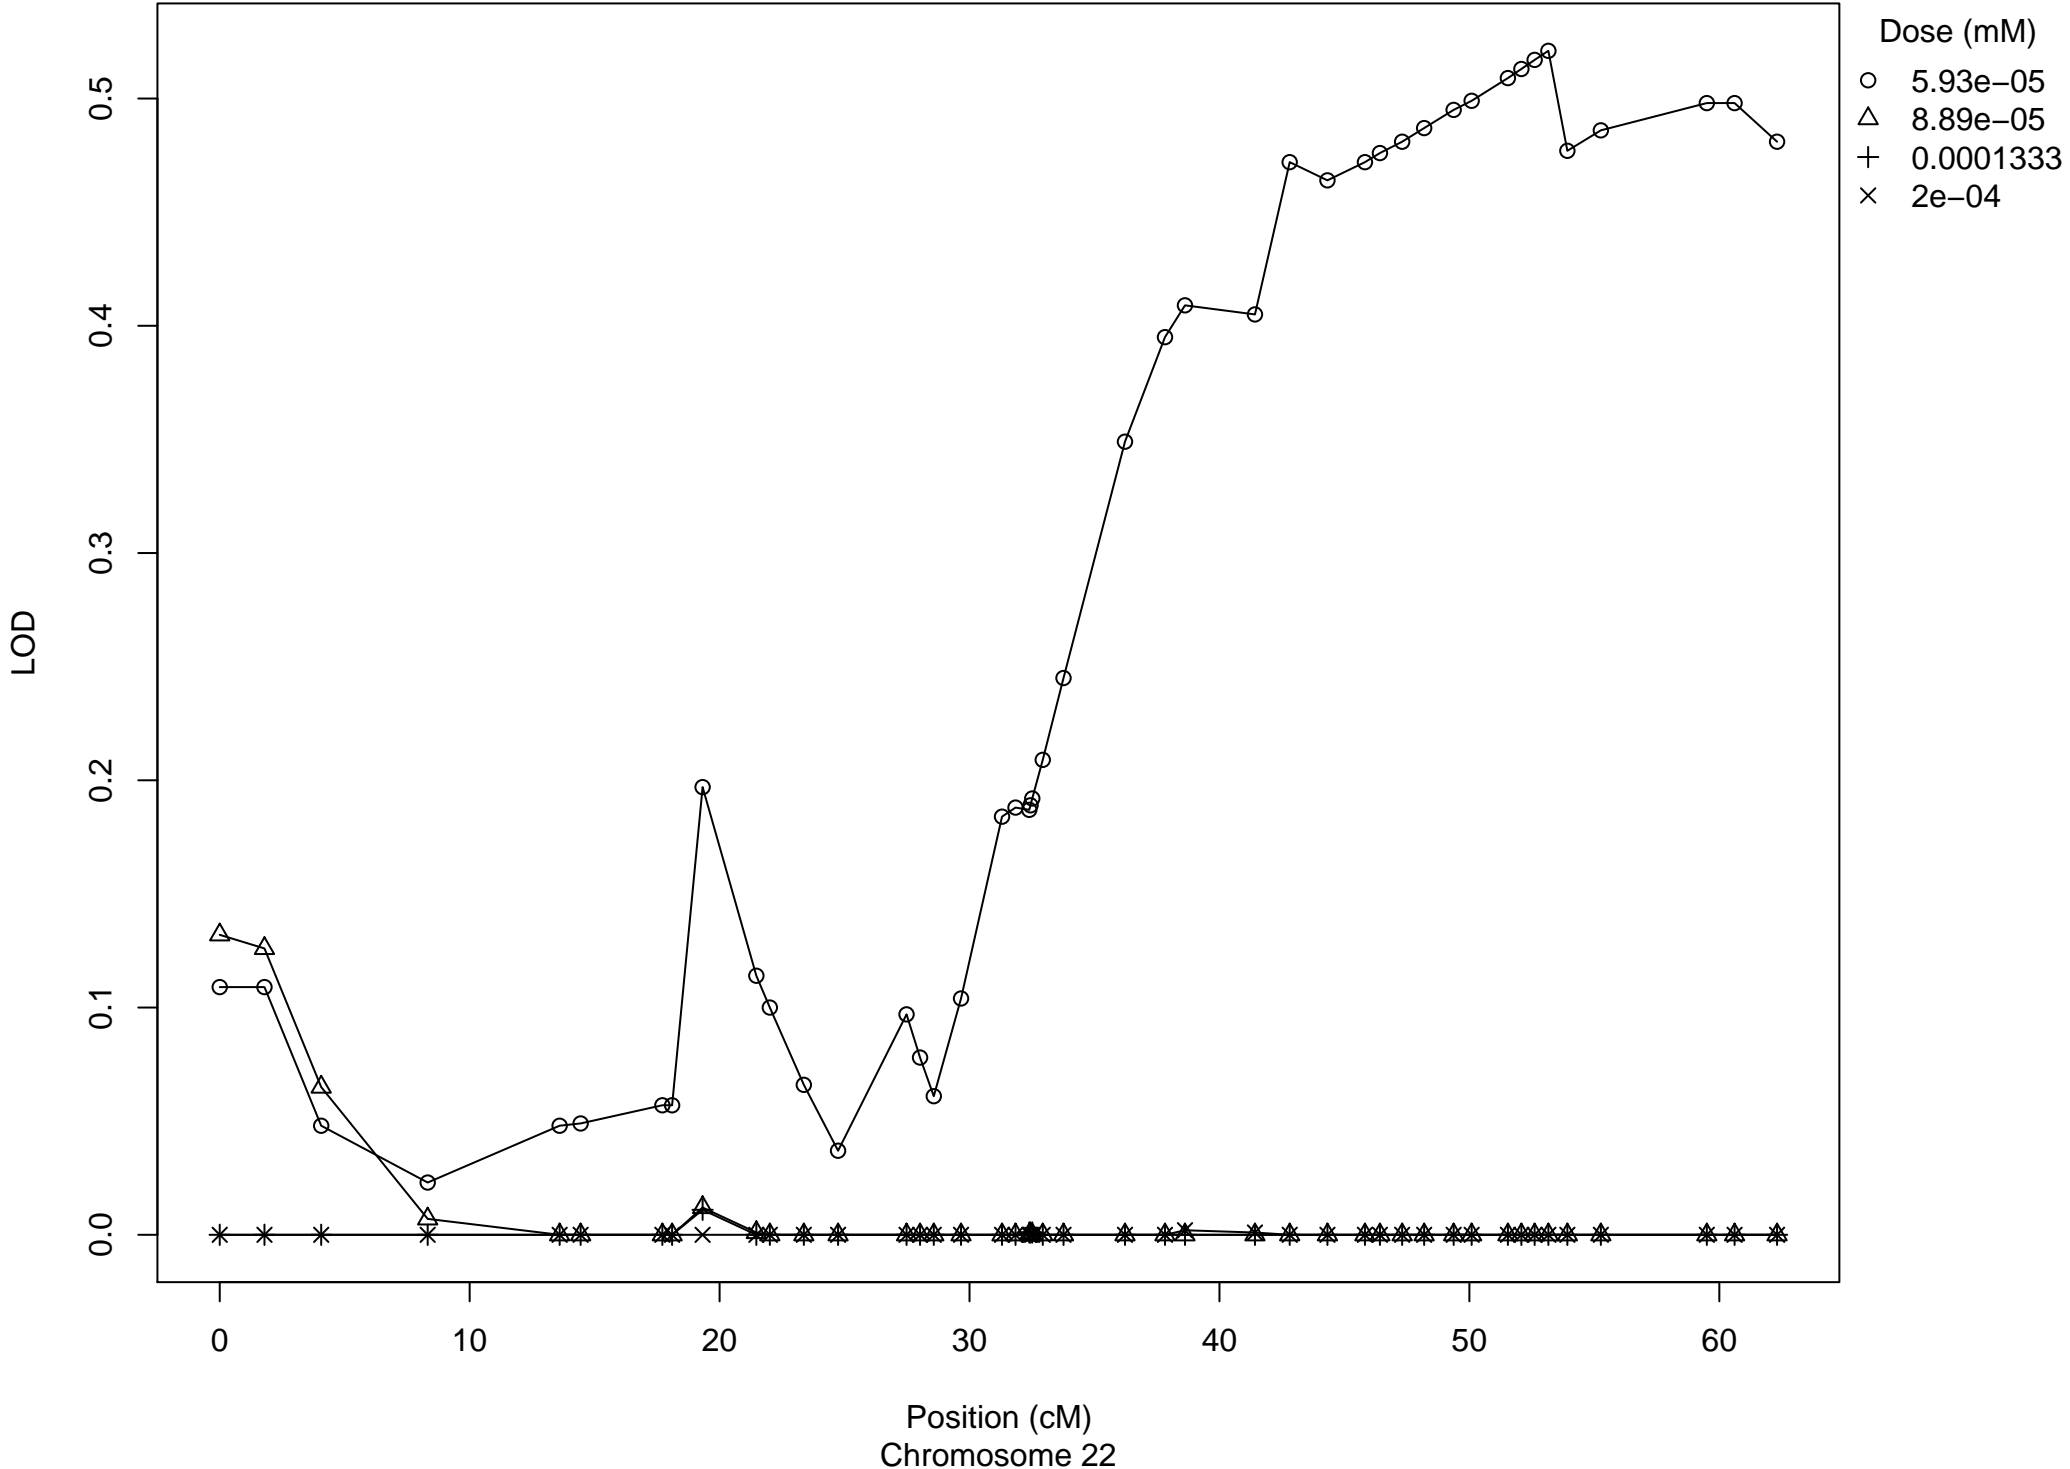

Supplement: NIHMS336613-supplement-figure_6.pdf [file NIHMS336613-supplement-figure_6.pdf]
