# Supplementary material
Source: PubMed Central journal article supplement (PMC3399590)
Supplement: NIHMS336613-supplement-figure_3.pdf [file NIHMS336613-supplement-figure_3.pdf]

Significant Peaks

| Drug   | Highest Heritability<br>Dose (mM) | Chromosome | Peak Start cM | Peak End cM | Peak LOD Score | Number of Significant Replications at Additional Doses | Number of Minimally Suggestive Replications at Additional Doses |
|--------|-----------------------------------|------------|---------------|-------------|----------------|--------------------------------------------------------|-----------------------------------------------------------------|
| 5FU    | 0.022222                          | 7          | 126.75        | 181.97      | 1.41           | 1                                                      | 1                                                               |
| Arsen  | 0.044444                          | 5          | 53.23         | 63.6        | 1.596          | 2                                                      | 2                                                               |
| Bleo   | 0.01                              | 2          | 216.31        | 231.27      | 1.503          | 0                                                      | 2                                                               |
| Busulf | 0.0125                            | 7          | 160.09        | 181.97      | 1.467          | 0                                                      | 0                                                               |
| Carbo  | 0.008                             | 5          | 0             | 7.77        | 1.48           | 3                                                      | 3                                                               |
| Carbo  | 0.008                             | 7          | 57.79         | 123.01      | 1.471          | 2                                                      | 2                                                               |
| Carbo  | 0.008                             | 19         | 92.56         | 105.02      | 1.568          | 2                                                      | 2                                                               |
| Daun   | 0.0001                            | 7          | 136.06        | 173.03      | 1.257          | 1                                                      | 2                                                               |
| Doc    | 0.000032                          | 7          | 160.09        | 181.97      | 1.595          | 2                                                      | 2                                                               |
| Doc    | 0.000032                          | 11         | 43.16         | 60.09       | 2              | 1                                                      | 2                                                               |
| Dox    | 0.00005                           | 15         | 0             | 34.83       | 1.108          | 1                                                      | 1                                                               |
| Dox    | 0.00005                           | 19         | 92.56         | 105.02      | 1.338          | 0                                                      | 0                                                               |
| Flox   | 0.0285714                         | 3          | 186.04        | 209.41      | 2.094          | 3                                                      | 3                                                               |
| Flox   | 0.0285714                         | 7          | 143.33        | 181.97      | 1.521          | 3                                                      | 3                                                               |
| Ida    | 0.0000625                         | 7          | 134.55        | 170.94      | 1.839          | 2                                                      | 2                                                               |
| Ida    | 0.0000625                         | 19         | 92.56         | 105.02      | 1.404          | 1                                                      | 2                                                               |
| Mitom  | 0.0000333                         | 11         | 33.02         | 71.6        | 2.212          | 0                                                      | 2                                                               |
| Oxal   | 0.1                               | 1          | 20.61         | 57.83       | 2.091          | 1                                                      | 1                                                               |
| Oxal   | 0.1                               | 3          | 186.68        | 222.83      | 1.712          | 1                                                      | 1                                                               |
| Pac    | 0.0005                            | 1          | 23.35         | 55.1        | 1.685          | 1                                                      | 1                                                               |
| Pac    | 0.0005                            | 21         | 9.72          | 40.43       | 1.685          | 0                                                      | 0                                                               |
| Rapa   | 0.0001                            | 8          | 111.68        | 165.93      | 1.542          | 2                                                      | 3                                                               |
| Temo   | 0.125                             | 2          | 72.79         | 128.41      | 1.53           | 0                                                      | 1                                                               |
| Temo   | 0.125                             | 14         | 0             | 47.51       | 1.308          | 2                                                      | 3                                                               |
| Temo   | 0.125                             | 20         | 0             | 31.43       | 1.688          | 2                                                      | 3                                                               |
| Teni   | 0.00064                           | 13         | 0             | 25.8        | 1.622          | 2                                                      | 2                                                               |
| Topo   | 0.00003                           | 12         | 6.42          | 38.5        | 1.698          | 1                                                      | 1                                                               |
| Topo   | 0.00003                           | 18         | 58.45         | 77.36       | 1.677          | 1                                                      | 2                                                               |
| Vinb   | 0.000005                          | 7          | 155.79        | 181.97      | 2.061          | 1                                                      | 1                                                               |
| Vinc   | 0.0001                            | 11         | 7.03          | 65.05       | 1.343          | 1                                                      | 2                                                               |
| Vino   | 0.0002                            | 11         | 0             | 53.56       | 1.541          | 0                                                      | 1                                                               |

## Suggestive Peaks

| Drug  | Dose     | Chromosome | Peak Start cM | Peak End cM | Peak LOD Score | Number of Suggestive Replications at Additional Doses |
|-------|----------|------------|---------------|-------------|----------------|-------------------------------------------------------|
| 5FU   | 0.022222 | 2          | 89.76         | 101.02      | 0.726          | 1                                                     |
| 5FU   | 0.022222 | 2          | 120.29        | 129.79      | 0.982          | 0                                                     |
| 5FU   | 0.022222 | 3          | 27.72         | 29.19       | 0.601          | 1                                                     |
| 5FU   | 0.022222 | 3          | 48.09         | 50.25       | 0.659          | 1                                                     |
| 5FU   | 0.022222 | 5          | 58.55         | 62.26       | 0.688          | 1                                                     |
| 5FU   | 0.022222 | 5          | 63.6          | 64.67       | 0.637          | 0                                                     |
| 5FU   | 0.022222 | 5          | 66.81         | 68.63       | 0.684          | 0                                                     |
| 5FU   | 0.022222 | 6          | 151.42        | 159.44      | 0.75           | 0                                                     |
| 5FU   | 0.022222 | 6          | 161.59        | 164.78      | 0.936          | 1                                                     |
| 5FU   | 0.022222 | 7          | 65.55         | 78.65       | 0.864          | 2                                                     |
| 5FU   | 0.022222 | 7          | 83.99         | 86.12       | 0.699          | 1                                                     |
| 5FU   | 0.022222 | 7          | 94.4          | 125.15      | 0.982          | 1                                                     |
| 5FU   | 0.022222 | 7          | 126.75        | 181.97      | 1.41           | 1                                                     |
| 5FU   | 0.022222 | 8          | 121.9         | 133.64      | 0.851          | 0                                                     |
| 5FU   | 0.022222 | 8          | 141.68        | 165.93      | 0.806          | 1                                                     |
| 5FU   | 0.022222 | 9          | 0             | 21.88       | 1.01           | 1                                                     |
| 5FU   | 0.022222 | 9          | 88.92         | 91.87       | 0.724          | 1                                                     |
| 5FU   | 0.022222 | 10         | 27.19         | 35.41       | 0.815          | 0                                                     |
| 5FU   | 0.022222 | 11         | 0             | 7.03        | 0.794          | 0                                                     |
| 5FU   | 0.022222 | 11         | 16.12         | 35.21       | 1.104          | 1                                                     |
| 5FU   | 0.022222 | 14         | 0             | 25.87       | 1.202          | 2                                                     |
| 5FU   | 0.022222 | 16         | 77.13         | 87.06       | 0.788          | 1                                                     |
| 5FU   | 0.022222 | 19         | 100.01        | 105.02      | 0.996          | 1                                                     |
| 5FU   | 0.022222 | 20         | 83.51         | 101.22      | 0.991          | 2                                                     |
| 5FU   | 0.022222 | 21         | 52.5          | 53.05       | 0.585          | 2                                                     |
| 5FU   | 0.022222 | 21         | 54.22         | 57.77       | 0.642          | 2                                                     |
| 5FU   | 0.022222 | 22         | 21.47         | 38.62       | 1.295          | 1                                                     |
| Arsen | 0.044444 | 1          | 89.49         | 120.28      | 1.284          | 2                                                     |
| Arsen | 0.044444 | 1          | 125.51        | 129.37      | 0.73           | 0                                                     |
| Arsen | 0.044444 | 3          | 36.65         | 38.28       | 0.678          | 1                                                     |
| Arsen | 0.044444 | 3          | 44.81         | 50.94       | 0.671          | 1                                                     |
| Arsen | 0.044444 | 3          | 99.38         | 101.55      | 0.629          | 0                                                     |
| Arsen | 0.044444 | 4          | 190.02        | 199.93      | 0.866          | 0                                                     |
| Arsen | 0.044444 | 5          | 46.22         | 51.99       | 0.66           | 1                                                     |
| Arsen | 0.044444 | 5          | 53.23         | 63.6        | 1.596          | 2                                                     |
| Arsen | 0.044444 | 6          | 9.18          | 11.89       | 0.868          | 0                                                     |
| Arsen | 0.044444 | 6          | 182.11        | 190.14      | 0.731          | 1                                                     |
| Arsen | 0.044444 | 7          | 97.38         | 103.63      | 0.884          | 0                                                     |
| Arsen | 0.044444 | 8          | 121.9         | 128.16      | 0.915          | 1                                                     |
| Arsen | 0.044444 | 11         | 4.84          | 7.03        | 0.63           | 0                                                     |
| Arsen | 0.044444 | 17         | 6.6           | 10.02       | 0.615          | 1                                                     |
| Arsen | 0.044444 | 18         | 95.46         | 96.48       | 0.68           | 0                                                     |
| Arsen | 0.044444 | 18         | 108           | 118.84      | 1.13           | 0                                                     |
| Arsen | 0.044444 | 21         | 0             | 11.3        | 0.769          | 1                                                     |

### Suggestive Peaks

|        |         |    |        |        |       |   |
|--------|---------|----|--------|--------|-------|---|
| Arsen  | 0.04444 | 21 | 31.26  | 52.5   | 1.228 | 2 |
| Aza    | 0.0684  | 3  | 5.54   | 24.29  | 1.037 | 0 |
| Aza    | 0.0684  | 4  | 152.98 | 153.51 | 0.581 | 1 |
| Aza    | 0.0684  | 5  | 75.89  | 78.31  | 0.602 | 0 |
| Aza    | 0.0684  | 5  | 89.3   | 93.59  | 0.66  | 0 |
| Aza    | 0.0684  | 5  | 97.21  | 99.42  | 0.739 | 0 |
| Aza    | 0.0684  | 7  | 143.33 | 149.9  | 0.735 | 2 |
| Aza    | 0.0684  | 8  | 148.12 | 158.49 | 0.673 | 1 |
| Aza    | 0.0684  | 14 | 9.36   | 12.46  | 0.641 | 0 |
| Aza    | 0.0684  | 14 | 13.89  | 14.6   | 0.659 | 0 |
| Aza    | 0.0684  | 14 | 47.51  | 49.9   | 0.655 | 2 |
| Aza    | 0.0684  | 14 | 53.19  | 60.43  | 0.807 | 2 |
| Aza    | 0.0684  | 16 | 81.15  | 84.75  | 0.633 | 0 |
| Aza    | 0.0684  | 18 | 118.84 | 124.11 | 0.869 | 2 |
| Aza    | 0.0684  | 21 | 4.67   | 20.45  | 0.96  | 1 |
| Aza    | 0.0684  | 21 | 24.73  | 27.4   | 0.868 | 1 |
| Aza    | 0.0684  | 22 | 21.47  | 41.42  | 1.129 | 1 |
| Bleo   | 0.01    | 1  | 8.85   | 20.61  | 1.004 | 1 |
| Bleo   | 0.01    | 1  | 23.35  | 29.93  | 0.725 | 0 |
| Bleo   | 0.01    | 1  | 35.4   | 38.51  | 0.848 | 2 |
| Bleo   | 0.01    | 1  | 120.28 | 125.51 | 0.663 | 1 |
| Bleo   | 0.01    | 1  | 132.47 | 143.31 | 0.876 | 1 |
| Bleo   | 0.01    | 1  | 163.34 | 169.68 | 0.915 | 2 |
| Bleo   | 0.01    | 2  | 94.05  | 95.67  | 0.628 | 1 |
| Bleo   | 0.01    | 2  | 142.83 | 144.52 | 0.642 | 1 |
| Bleo   | 0.01    | 2  | 177.53 | 182.96 | 0.97  | 1 |
| Bleo   | 0.01    | 2  | 193.26 | 194.45 | 0.626 | 2 |
| Bleo   | 0.01    | 2  | 216.31 | 231.27 | 1.503 | 2 |
| Bleo   | 0.01    | 5  | 24.48  | 41.06  | 1.245 | 3 |
| Bleo   | 0.01    | 5  | 47.09  | 58.55  | 1.488 | 2 |
| Bleo   | 0.01    | 7  | 27.66  | 33.05  | 0.728 | 2 |
| Bleo   | 0.01    | 7  | 40.62  | 54.84  | 1.305 | 2 |
| Bleo   | 0.01    | 7  | 144.72 | 149.9  | 0.75  | 2 |
| Bleo   | 0.01    | 12 | 155.94 | 165.69 | 0.958 | 0 |
| Bleo   | 0.01    | 14 | 40.11  | 47.51  | 1.147 | 1 |
| Bleo   | 0.01    | 16 | 79.43  | 81.15  | 0.661 | 3 |
| Bleo   | 0.01    | 16 | 81.95  | 84.75  | 0.631 | 2 |
| Bleo   | 0.01    | 17 | 3.92   | 27.75  | 1.483 | 2 |
| Bleo   | 0.01    | 17 | 97.56  | 99.21  | 0.739 | 1 |
| Bleo   | 0.01    | 18 | 0      | 16.54  | 0.988 | 2 |
| Bleo   | 0.01    | 19 | 85.87  | 105.02 | 1.243 | 3 |
| Bleo   | 0.01    | 20 | 64.88  | 74.47  | 0.805 | 0 |
| Busulf | 0.0125  | 1  | 188.85 | 191.52 | 0.593 | 0 |
| Busulf | 0.0125  | 5  | 123.45 | 133.65 | 0.758 | 0 |
| Busulf | 0.0125  | 6  | 66.37  | 68.65  | 0.635 | 1 |
| Busulf | 0.0125  | 7  | 160.09 | 181.97 | 1.467 | 0 |
| Busulf | 0.0125  | 11 | 85.48  | 86.98  | 0.617 | 0 |
| Busulf | 0.0125  | 11 | 91.47  | 96.85  | 0.927 | 0 |
| Busulf | 0.0125  | 16 | 29.97  | 44.45  | 0.905 | 0 |

### Suggestive Peaks

|        |        |    |        |        |       |   |
|--------|--------|----|--------|--------|-------|---|
| Busulf | 0.0125 | 16 | 58.46  | 78.57  | 0.945 | 0 |
| Busulf | 0.0125 | 19 | 100.01 | 105.02 | 0.957 | 0 |
| Busulf | 0.0125 | 20 | 98.09  | 101.22 | 1.011 | 1 |
| Carbo  | 0.008  | 1  | 125.51 | 145.45 | 0.934 | 1 |
| Carbo  | 0.008  | 1  | 158.75 | 168.52 | 0.684 | 2 |
| Carbo  | 0.008  | 2  | 90.82  | 119.22 | 1.02  | 2 |
| Carbo  | 0.008  | 2  | 120.29 | 124.03 | 0.726 | 1 |
| Carbo  | 0.008  | 2  | 129.79 | 130.37 | 0.583 | 1 |
| Carbo  | 0.008  | 2  | 131.51 | 132.58 | 0.608 | 1 |
| Carbo  | 0.008  | 2  | 231.27 | 240.79 | 0.682 | 0 |
| Carbo  | 0.008  | 3  | 191.79 | 198.68 | 0.675 | 1 |
| Carbo  | 0.008  | 5  | 0      | 7.77   | 1.48  | 3 |
| Carbo  | 0.008  | 5  | 11.85  | 14.3   | 0.666 | 0 |
| Carbo  | 0.008  | 5  | 58.55  | 59.3   | 0.632 | 2 |
| Carbo  | 0.008  | 5  | 60.92  | 64.67  | 0.694 | 2 |
| Carbo  | 0.008  | 5  | 133.65 | 149.48 | 1.073 | 2 |
| Carbo  | 0.008  | 6  | 154.64 | 159.44 | 0.636 | 0 |
| Carbo  | 0.008  | 6  | 161.59 | 164.78 | 1.072 | 2 |
| Carbo  | 0.008  | 6  | 173.31 | 177.88 | 0.838 | 1 |
| Carbo  | 0.008  | 7  | 57.79  | 123.01 | 1.471 | 2 |
| Carbo  | 0.008  | 7  | 140.63 | 155.1  | 1.313 | 1 |
| Carbo  | 0.008  | 8  | 126.14 | 139.53 | 0.898 | 0 |
| Carbo  | 0.008  | 8  | 148.12 | 165.93 | 1.085 | 0 |
| Carbo  | 0.008  | 9  | 87.29  | 91.87  | 0.729 | 1 |
| Carbo  | 0.008  | 9  | 93.37  | 94.85  | 0.59  | 2 |
| Carbo  | 0.008  | 10 | 37.9   | 40.36  | 0.631 | 0 |
| Carbo  | 0.008  | 13 | 0      | 6.99   | 0.869 | 0 |
| Carbo  | 0.008  | 13 | 19.36  | 37.5   | 0.779 | 1 |
| Carbo  | 0.008  | 14 | 8.28   | 13.89  | 0.906 | 1 |
| Carbo  | 0.008  | 15 | 109.29 | 122.14 | 0.634 | 1 |
| Carbo  | 0.008  | 16 | 50.6   | 59.68  | 0.899 | 0 |
| Carbo  | 0.008  | 19 | 54.01  | 58.69  | 0.73  | 0 |
| Carbo  | 0.008  | 19 | 92.56  | 105.02 | 1.568 | 2 |
| Carbo  | 0.008  | 20 | 95.7   | 101.22 | 0.769 | 1 |
| Clad   | 0.01   | 1  | 104.23 | 114.24 | 0.863 | 0 |
| Clad   | 0.01   | 2  | 214.71 | 222.2  | 0.822 | 1 |
| Clad   | 0.01   | 4  | 121.61 | 126.15 | 0.653 | 1 |
| Clad   | 0.01   | 4  | 154.63 | 155.75 | 0.67  | 0 |
| Clad   | 0.01   | 4  | 157.99 | 158.65 | 0.64  | 0 |
| Clad   | 0.01   | 4  | 167.55 | 173.59 | 0.782 | 2 |
| Clad   | 0.01   | 7  | 76.71  | 86.12  | 1.152 | 1 |
| Clad   | 0.01   | 7  | 97.38  | 103.63 | 0.824 | 0 |
| Clad   | 0.01   | 8  | 48.79  | 62.47  | 0.998 | 1 |
| Clad   | 0.01   | 9  | 18.06  | 32.24  | 1.039 | 1 |
| Clad   | 0.01   | 9  | 34.42  | 42.73  | 0.758 | 0 |
| Clad   | 0.01   | 11 | 115.53 | 138.56 | 1.488 | 1 |
| Clad   | 0.01   | 15 | 43.47  | 47.29  | 0.699 | 2 |
| Cytar  | 0.005  | 2  | 76.34  | 101.02 | 1.182 | 1 |
| Cytar  | 0.005  | 2  | 238.33 | 240.79 | 0.565 | 1 |

### Suggestive Peaks

|       |          |    |        |        |       |   |
|-------|----------|----|--------|--------|-------|---|
| Cytar | 0.005    | 5  | 73.35  | 83.27  | 1.043 | 1 |
| Cytar | 0.005    | 6  | 161.59 | 164.78 | 0.572 | 0 |
| Cytar | 0.005    | 7  | 72.78  | 73.31  | 0.577 | 0 |
| Cytar | 0.005    | 7  | 75.44  | 78.65  | 0.768 | 1 |
| Cytar | 0.005    | 7  | 80.42  | 122.48 | 0.852 | 1 |
| Cytar | 0.005    | 7  | 140.63 | 149.9  | 0.892 | 1 |
| Cytar | 0.005    | 8  | 102.62 | 103.69 | 0.605 | 2 |
| Cytar | 0.005    | 10 | 27.19  | 32.92  | 0.779 | 2 |
| Cytar | 0.005    | 11 | 12.92  | 37.62  | 1.152 | 1 |
| Cytar | 0.005    | 12 | 160.68 | 165.69 | 0.613 | 1 |
| Cytar | 0.005    | 13 | 66.59  | 75.19  | 0.923 | 1 |
| Cytar | 0.005    | 15 | 0      | 21.58  | 0.873 | 2 |
| Cytar | 0.005    | 18 | 77.36  | 80.41  | 0.61  | 0 |
| Cytar | 0.005    | 19 | 49.75  | 59.36  | 1.16  | 1 |
| Cytar | 0.005    | 19 | 100.01 | 105.02 | 0.997 | 1 |
| Cytar | 0.005    | 22 | 21.47  | 22.01  | 0.548 | 0 |
| Daun  | 0.0001   | 1  | 35.4   | 56.19  | 1.089 | 2 |
| Daun  | 0.0001   | 1  | 109.04 | 120.28 | 0.581 | 1 |
| Daun  | 0.0001   | 1  | 126.16 | 130.73 | 0.625 | 1 |
| Daun  | 0.0001   | 2  | 198.65 | 199.18 | 0.547 | 2 |
| Daun  | 0.0001   | 3  | 203.28 | 206.43 | 0.681 | 0 |
| Daun  | 0.0001   | 3  | 218.66 | 227.57 | 0.648 | 0 |
| Daun  | 0.0001   | 4  | 85.18  | 90.28  | 0.643 | 0 |
| Daun  | 0.0001   | 4  | 178.66 | 183.63 | 0.587 | 1 |
| Daun  | 0.0001   | 7  | 136.06 | 173.03 | 1.257 | 2 |
| Daun  | 0.0001   | 8  | 26.43  | 34.76  | 0.735 | 1 |
| Daun  | 0.0001   | 9  | 70.33  | 85.69  | 0.642 | 0 |
| Daun  | 0.0001   | 11 | 23.12  | 37.62  | 0.963 | 0 |
| Daun  | 0.0001   | 12 | 146.39 | 168.79 | 0.913 | 2 |
| Daun  | 0.0001   | 13 | 19.36  | 61.17  | 0.713 | 1 |
| Daun  | 0.0001   | 14 | 31.13  | 36.76  | 0.765 | 0 |
| Daun  | 0.0001   | 15 | 0      | 25.3   | 0.865 | 2 |
| Daun  | 0.0001   | 16 | 79.43  | 95.08  | 0.774 | 0 |
| Daun  | 0.0001   | 18 | 5.58   | 16.54  | 0.757 | 0 |
| Daun  | 0.0001   | 18 | 51.21  | 71     | 0.919 | 1 |
| Daun  | 0.0001   | 19 | 20.75  | 22.96  | 0.572 | 1 |
| Daun  | 0.0001   | 19 | 92.56  | 105.02 | 1.126 | 1 |
| Doc   | 0.000032 | 1  | 0      | 8.85   | 0.798 | 2 |
| Doc   | 0.000032 | 1  | 168.52 | 175.03 | 0.987 | 1 |
| Doc   | 0.000032 | 1  | 191.52 | 194.89 | 0.705 | 1 |
| Doc   | 0.000032 | 2  | 161.26 | 185.13 | 1.041 | 1 |
| Doc   | 0.000032 | 6  | 61.86  | 65.14  | 0.755 | 0 |
| Doc   | 0.000032 | 7  | 86.12  | 94.4   | 0.896 | 0 |
| Doc   | 0.000032 | 7  | 160.09 | 181.97 | 1.595 | 2 |
| Doc   | 0.000032 | 10 | 63.83  | 74.5   | 0.956 | 0 |
| Doc   | 0.000032 | 10 | 103.43 | 105.04 | 0.653 | 1 |
| Doc   | 0.000032 | 11 | 43.16  | 60.09  | 2     | 2 |
| Doc   | 0.000032 | 11 | 79.43  | 85.48  | 0.728 | 0 |
| Doc   | 0.000032 | 11 | 86.08  | 100.05 | 1.439 | 0 |

### Suggestive Peaks

|     |          |    |        |        |       |   |
|-----|----------|----|--------|--------|-------|---|
| Doc | 0.000032 | 14 | 89.19  | 95.89  | 0.735 | 1 |
| Doc | 0.000032 | 14 | 96.42  | 125.88 | 1.063 | 0 |
| Doc | 0.000032 | 15 | 107.71 | 122.14 | 0.944 | 0 |
| Doc | 0.000032 | 16 | 57.79  | 63.78  | 0.671 | 0 |
| Doc | 0.000032 | 16 | 65.1   | 65.77  | 0.615 | 0 |
| Dox | 0.00005  | 1  | 35.4   | 37.05  | 0.579 | 0 |
| Dox | 0.00005  | 1  | 41.92  | 49.07  | 0.567 | 0 |
| Dox | 0.00005  | 3  | 203.28 | 214.45 | 1.03  | 1 |
| Dox | 0.00005  | 7  | 57.79  | 103.63 | 1.116 | 1 |
| Dox | 0.00005  | 7  | 141.29 | 149.9  | 0.771 | 0 |
| Dox | 0.00005  | 8  | 26.43  | 48.79  | 0.784 | 1 |
| Dox | 0.00005  | 8  | 153.48 | 162.94 | 0.634 | 0 |
| Dox | 0.00005  | 12 | 150.7  | 155.94 | 0.803 | 0 |
| Dox | 0.00005  | 12 | 159.59 | 168.79 | 0.805 | 0 |
| Dox | 0.00005  | 13 | 6.03   | 6.99   | 0.543 | 0 |
| Dox | 0.00005  | 13 | 8.87   | 10.71  | 0.541 | 0 |
| Dox | 0.00005  | 13 | 15.19  | 17.21  | 0.528 | 0 |
| Dox | 0.00005  | 13 | 19.36  | 32.9   | 0.878 | 0 |
| Dox | 0.00005  | 15 | 0      | 34.83  | 1.108 | 1 |
| Dox | 0.00005  | 16 | 77.13  | 97.03  | 0.633 | 0 |
| Dox | 0.00005  | 18 | 66.66  | 71.32  | 0.636 | 1 |
| Dox | 0.00005  | 19 | 5.54   | 9.84   | 0.578 | 1 |
| Dox | 0.00005  | 19 | 37.94  | 42.28  | 0.608 | 0 |
| Dox | 0.00005  | 19 | 92.56  | 105.02 | 1.338 | 0 |
| Dox | 0.00005  | 20 | 90.06  | 101.22 | 0.724 | 0 |
| Epi | 0.0004   | 1  | 158.75 | 163.34 | 0.784 | 0 |
| Epi | 0.0004   | 2  | 141.62 | 146.15 | 0.796 | 0 |
| Epi | 0.0004   | 3  | 18.38  | 36.1   | 0.897 | 1 |
| Epi | 0.0004   | 3  | 36.65  | 44.81  | 0.745 | 0 |
| Epi | 0.0004   | 5  | 73.35  | 75.89  | 0.798 | 1 |
| Epi | 0.0004   | 6  | 0      | 9.18   | 0.89  | 0 |
| Epi | 0.0004   | 6  | 11.89  | 16.84  | 0.745 | 0 |
| Epi | 0.0004   | 6  | 146.6  | 167.78 | 1.065 | 2 |
| Epi | 0.0004   | 7  | 57.79  | 62.87  | 0.746 | 0 |
| Epi | 0.0004   | 7  | 105.39 | 129.58 | 0.981 | 1 |
| Epi | 0.0004   | 7  | 130.17 | 149.9  | 1.156 | 1 |
| Epi | 0.0004   | 8  | 153.48 | 165.93 | 0.822 | 0 |
| Epi | 0.0004   | 10 | 59.03  | 70.06  | 0.819 | 0 |
| Epi | 0.0004   | 11 | 16.12  | 32.29  | 1.018 | 1 |
| Epi | 0.0004   | 11 | 33.02  | 35.21  | 0.708 | 1 |
| Epi | 0.0004   | 12 | 90.77  | 99.87  | 0.994 | 1 |
| Epi | 0.0004   | 12 | 136.35 | 136.82 | 0.877 | 1 |
| Epi | 0.0004   | 12 | 150.7  | 155.94 | 0.631 | 0 |
| Epi | 0.0004   | 12 | 165.69 | 168.79 | 0.636 | 0 |
| Epi | 0.0004   | 13 | 19.36  | 26.87  | 0.72  | 0 |
| Epi | 0.0004   | 13 | 28.04  | 61.17  | 0.919 | 1 |
| Epi | 0.0004   | 15 | 35.95  | 39.72  | 0.623 | 0 |
| Epi | 0.0004   | 16 | 8.16   | 18.07  | 0.823 | 0 |
| Epi | 0.0004   | 16 | 84.75  | 125.82 | 0.986 | 1 |

### Suggestive Peaks

|      |           |    |        |        |       |   |
|------|-----------|----|--------|--------|-------|---|
| Epi  | 0.0004    | 16 | 127.45 | 134.12 | 0.68  | 0 |
| Epi  | 0.0004    | 19 | 100.01 | 105.02 | 0.818 | 1 |
| Epi  | 0.0004    | 20 | 98.09  | 101.22 | 0.779 | 1 |
| Etop | 0.005     | 1  | 37.05  | 43.72  | 0.8   | 0 |
| Etop | 0.005     | 3  | 190.43 | 198.68 | 0.895 | 0 |
| Etop | 0.005     | 3  | 203.28 | 205.56 | 0.716 | 1 |
| Etop | 0.005     | 3  | 218.66 | 228.14 | 1.068 | 0 |
| Etop | 0.005     | 7  | 73.31  | 74.38  | 0.777 | 2 |
| Etop | 0.005     | 9  | 58.26  | 64.72  | 0.677 | 0 |
| Etop | 0.005     | 9  | 79.06  | 81.38  | 0.731 | 0 |
| Etop | 0.005     | 9  | 81.92  | 91.87  | 0.939 | 2 |
| Etop | 0.005     | 9  | 93.37  | 94.85  | 0.624 | 2 |
| Etop | 0.005     | 11 | 29.18  | 40.12  | 1.085 | 0 |
| Etop | 0.005     | 12 | 150.7  | 155.94 | 0.848 | 1 |
| Etop | 0.005     | 12 | 159.59 | 165.69 | 0.725 | 1 |
| Etop | 0.005     | 14 | 0      | 8.28   | 0.645 | 0 |
| Etop | 0.005     | 14 | 13.89  | 42.81  | 1.496 | 2 |
| Etop | 0.005     | 15 | 0      | 25.3   | 1.358 | 3 |
| Etop | 0.005     | 18 | 64.48  | 74.93  | 0.956 | 2 |
| Etop | 0.005     | 19 | 100.01 | 100.38 | 0.632 | 1 |
| Etop | 0.005     | 19 | 102.37 | 105.02 | 0.627 | 0 |
| Flox | 0.0285714 | 1  | 271.48 | 288.29 | 0.88  | 1 |
| Flox | 0.0285714 | 3  | 186.04 | 209.41 | 2.094 | 3 |
| Flox | 0.0285714 | 3  | 212.61 | 217.24 | 0.78  | 0 |
| Flox | 0.0285714 | 3  | 222.83 | 228.14 | 0.677 | 0 |
| Flox | 0.0285714 | 5  | 148.63 | 149.48 | 0.621 | 0 |
| Flox | 0.0285714 | 5  | 171.06 | 182.35 | 1.042 | 2 |
| Flox | 0.0285714 | 7  | 70.64  | 75.44  | 0.991 | 1 |
| Flox | 0.0285714 | 7  | 108.59 | 113.92 | 0.847 | 0 |
| Flox | 0.0285714 | 7  | 143.33 | 181.97 | 1.521 | 3 |
| Flox | 0.0285714 | 9  | 81.92  | 94.85  | 0.965 | 3 |
| Flox | 0.0285714 | 14 | 0      | 25.87  | 0.987 | 1 |
| Flox | 0.0285714 | 15 | 9.85   | 13.06  | 0.677 | 1 |
| Flox | 0.0285714 | 15 | 107.71 | 122.14 | 0.787 | 1 |
| Flox | 0.0285714 | 16 | 81.15  | 87.06  | 0.774 | 1 |
| Flox | 0.0285714 | 18 | 70.71  | 74.93  | 0.757 | 1 |
| Flox | 0.0285714 | 21 | 28.48  | 38.65  | 0.942 | 3 |
| Flox | 0.0285714 | 21 | 39.22  | 40.43  | 0.625 | 0 |
| Flox | 0.0285714 | 22 | 27.48  | 33.76  | 0.861 | 1 |
| Flud | 0.1       | 1  | 104.23 | 116.72 | 0.976 | 0 |
| Flud | 0.1       | 2  | 214.71 | 216.31 | 0.826 | 1 |
| Flud | 0.1       | 4  | 154.63 | 155.41 | 0.571 | 1 |
| Flud | 0.1       | 4  | 161.04 | 164.81 | 0.62  | 1 |
| Flud | 0.1       | 7  | 77.91  | 78.65  | 0.758 | 1 |
| Flud | 0.1       | 7  | 84.52  | 86.12  | 0.656 | 1 |
| Flud | 0.1       | 7  | 93.1   | 113.39 | 1.305 | 1 |
| Flud | 0.1       | 7  | 140.63 | 148.11 | 0.849 | 2 |
| Flud | 0.1       | 9  | 21.88  | 32.24  | 0.98  | 0 |
| Flud | 0.1       | 9  | 34.42  | 42.73  | 0.819 | 1 |

### Suggestive Peaks

|        |         |    |        |        |       |   |
|--------|---------|----|--------|--------|-------|---|
| Flud   | 0.1     | 9  | 143.06 | 163.84 | 0.984 | 1 |
| Flud   | 0.1     | 11 | 16.12  | 26.34  | 0.806 | 1 |
| Flud   | 0.1     | 11 | 120.87 | 131.26 | 0.836 | 0 |
| Flud   | 0.1     | 12 | 90.77  | 95.03  | 0.997 | 1 |
| Flud   | 0.1     | 12 | 95.56  | 99.87  | 0.835 | 0 |
| Flud   | 0.1     | 15 | 0      | 23.89  | 0.837 | 2 |
| Flud   | 0.1     | 15 | 39.72  | 47.29  | 0.714 | 1 |
| Flud   | 0.1     | 19 | 100.01 | 100.38 | 0.759 | 1 |
| Gem    | 0.00002 | 2  | 193.26 | 196.85 | 0.814 | 1 |
| Gem    | 0.00002 | 3  | 27.72  | 29.92  | 0.722 | 1 |
| Gem    | 0.00002 | 3  | 46.13  | 60.98  | 1.403 | 0 |
| Gem    | 0.00002 | 4  | 33.42  | 47.58  | 0.731 | 2 |
| Gem    | 0.00002 | 4  | 152.98 | 154.63 | 0.751 | 2 |
| Gem    | 0.00002 | 4  | 155.31 | 161.04 | 0.902 | 2 |
| Gem    | 0.00002 | 4  | 167.55 | 171.39 | 0.823 | 2 |
| Gem    | 0.00002 | 5  | 194.88 | 195.49 | 0.713 | 0 |
| Gem    | 0.00002 | 6  | 0      | 14.07  | 1.138 | 2 |
| Gem    | 0.00002 | 6  | 75.45  | 76.62  | 0.633 | 0 |
| Gem    | 0.00002 | 7  | 143.33 | 149.9  | 0.739 | 1 |
| Gem    | 0.00002 | 7  | 155.99 | 166.48 | 0.966 | 2 |
| Gem    | 0.00002 | 8  | 8.34   | 15.38  | 0.753 | 1 |
| Gem    | 0.00002 | 8  | 17     | 20.61  | 0.619 | 2 |
| Gem    | 0.00002 | 9  | 18.06  | 27.32  | 1.075 | 1 |
| Gem    | 0.00002 | 11 | 14.52  | 26.98  | 1.002 | 1 |
| Gem    | 0.00002 | 20 | 42.28  | 54.09  | 1.137 | 2 |
| Hydrox | 0.15    | 1  | 125.51 | 136.34 | 0.877 | 1 |
| Hydrox | 0.15    | 2  | 94.05  | 99.41  | 0.687 | 0 |
| Hydrox | 0.15    | 2  | 129.79 | 149.89 | 1.375 | 1 |
| Hydrox | 0.15    | 3  | 50.25  | 55.11  | 0.65  | 0 |
| Hydrox | 0.15    | 3  | 203.28 | 207.73 | 0.954 | 1 |
| Hydrox | 0.15    | 3  | 210.09 | 217.24 | 0.825 | 2 |
| Hydrox | 0.15    | 3  | 218.66 | 227.57 | 0.87  | 1 |
| Hydrox | 0.15    | 6  | 141.15 | 159.44 | 0.879 | 2 |
| Hydrox | 0.15    | 6  | 161.59 | 164.78 | 1.171 | 1 |
| Hydrox | 0.15    | 6  | 173.31 | 177.88 | 0.82  | 0 |
| Hydrox | 0.15    | 7  | 54.84  | 73.84  | 1.337 | 2 |
| Hydrox | 0.15    | 7  | 74.38  | 78.65  | 1.062 | 2 |
| Hydrox | 0.15    | 7  | 83.99  | 86.12  | 0.72  | 1 |
| Hydrox | 0.15    | 7  | 103.63 | 112.1  | 0.841 | 1 |
| Hydrox | 0.15    | 8  | 34.76  | 67.27  | 1.238 | 1 |
| Hydrox | 0.15    | 11 | 112.33 | 147.77 | 1.474 | 1 |
| Hydrox | 0.15    | 12 | 91.46  | 94.49  | 0.667 | 0 |
| Hydrox | 0.15    | 13 | 0      | 6.99   | 0.627 | 2 |
| Hydrox | 0.15    | 13 | 19.36  | 59.79  | 1.347 | 3 |
| Hydrox | 0.15    | 13 | 62.83  | 63.9   | 0.689 | 0 |
| Hydrox | 0.15    | 13 | 64.43  | 73.04  | 0.81  | 0 |
| Hydrox | 0.15    | 15 | 109.29 | 122.14 | 0.664 | 1 |
| Hydrox | 0.15    | 16 | 65.1   | 65.77  | 0.651 | 1 |
| Hydrox | 0.15    | 16 | 71.77  | 77.13  | 0.676 | 1 |



### Suggestive Peaks

|        |           |    |        |        |       |   |
|--------|-----------|----|--------|--------|-------|---|
| Hydrox | 0.15      | 19 | 94.56  | 105.02 | 1.608 | 3 |
| Hydrox | 0.15      | 20 | 90.06  | 101.22 | 0.815 | 2 |
| Ida    | 0.0000625 | 1  | 49.07  | 50.28  | 0.552 | 0 |
| Ida    | 0.0000625 | 3  | 27.72  | 46.13  | 0.835 | 1 |
| Ida    | 0.0000625 | 3  | 48.09  | 49.18  | 0.634 | 0 |
| Ida    | 0.0000625 | 6  | 14.61  | 15.43  | 0.56  | 0 |
| Ida    | 0.0000625 | 6  | 161.59 | 164.78 | 0.634 | 1 |
| Ida    | 0.0000625 | 6  | 173.31 | 177.88 | 0.553 | 1 |
| Ida    | 0.0000625 | 7  | 94.4   | 124.08 | 1.033 | 2 |
| Ida    | 0.0000625 | 7  | 134.55 | 170.94 | 1.839 | 2 |
| Ida    | 0.0000625 | 10 | 27.19  | 40.36  | 0.916 | 1 |
| Ida    | 0.0000625 | 12 | 90.77  | 94.49  | 0.941 | 2 |
| Ida    | 0.0000625 | 12 | 96.09  | 97.16  | 0.615 | 1 |
| Ida    | 0.0000625 | 12 | 153.19 | 168.79 | 1.064 | 0 |
| Ida    | 0.0000625 | 13 | 26.87  | 79.49  | 0.85  | 1 |
| Ida    | 0.0000625 | 14 | 13.89  | 34.43  | 1.107 | 0 |
| Ida    | 0.0000625 | 15 | 9.85   | 12.3   | 0.573 | 1 |
| Ida    | 0.0000625 | 16 | 75.34  | 87.06  | 0.868 | 2 |
| Ida    | 0.0000625 | 18 | 67.21  | 71     | 0.664 | 0 |
| Ida    | 0.0000625 | 19 | 92.56  | 105.02 | 1.404 | 2 |
| Mitom  | 0.0000333 | 2  | 215.78 | 221.13 | 1.085 | 1 |
| Mitom  | 0.0000333 | 2  | 222.2  | 245.44 | 1.344 | 0 |
| Mitom  | 0.0000333 | 6  | 60.44  | 68.65  | 1.105 | 1 |
| Mitom  | 0.0000333 | 10 | 68.63  | 80.19  | 1.006 | 0 |
| Mitom  | 0.0000333 | 10 | 98.96  | 103.43 | 0.794 | 1 |
| Mitom  | 0.0000333 | 11 | 33.02  | 71.6   | 2.212 | 2 |
| Mitom  | 0.0000333 | 11 | 87.89  | 97.92  | 1.303 | 0 |
| Mitom  | 0.0000333 | 11 | 98.45  | 98.98  | 0.628 | 0 |
| Mitom  | 0.0000333 | 13 | 0      | 6.99   | 0.771 | 1 |
| Mitom  | 0.0000333 | 15 | 44.9   | 52.33  | 1.031 | 0 |
| Mitom  | 0.0000333 | 15 | 75.85  | 78.92  | 0.649 | 0 |
| Mitom  | 0.0000333 | 15 | 98.44  | 102.21 | 0.727 | 0 |
| Mitom  | 0.0000333 | 15 | 104.86 | 122.14 | 1.016 | 0 |
| Mitom  | 0.0000333 | 16 | 12.57  | 20.77  | 0.903 | 0 |
| Mitom  | 0.0000333 | 16 | 65.1   | 67.4   | 0.899 | 0 |
| Mitom  | 0.0000333 | 16 | 70.69  | 85.94  | 1.239 | 1 |
| Mitom  | 0.0000333 | 18 | 64.48  | 66.66  | 0.677 | 0 |
| Mitom  | 0.0000333 | 22 | 13.6   | 27.48  | 0.854 | 0 |
| Mitox  | 0.0001    | 3  | 8.31   | 18.97  | 0.81  | 0 |
| Mitox  | 0.0001    | 3  | 191.79 | 198.68 | 0.716 | 2 |
| Mitox  | 0.0001    | 5  | 0      | 1.72   | 0.612 | 0 |
| Mitox  | 0.0001    | 9  | 79.06  | 105.82 | 1.242 | 1 |
| Mitox  | 0.0001    | 11 | 17.19  | 24.73  | 0.711 | 0 |
| Mitox  | 0.0001    | 12 | 95.56  | 101.98 | 0.807 | 0 |
| Mitox  | 0.0001    | 12 | 111.87 | 113.91 | 0.694 | 0 |
| Mitox  | 0.0001    | 12 | 130.94 | 155.94 | 1.053 | 1 |
| Mitox  | 0.0001    | 13 | 0      | 6.99   | 0.672 | 2 |
| Mitox  | 0.0001    | 13 | 8.87   | 10.71  | 0.644 | 2 |
| Mitox  | 0.0001    | 14 | 0      | 25.87  | 1.124 | 1 |

### Suggestive Peaks

|       |        |    |        |        |       |   |
|-------|--------|----|--------|--------|-------|---|
| Mitox | 0.0001 | 16 | 77.71  | 87.06  | 0.99  | 0 |
| Mitox | 0.0001 | 18 | 62.29  | 66.66  | 0.668 | 0 |
| Mitox | 0.0001 | 18 | 68.3   | 71.32  | 0.789 | 0 |
| Mitox | 0.0001 | 18 | 74.93  | 88.62  | 0.86  | 0 |
| Mitox | 0.0001 | 18 | 119.44 | 120.05 | 0.604 | 0 |
| Mitox | 0.0001 | 21 | 43.67  | 51.49  | 0.741 | 0 |
| Mitox | 0.0001 | 21 | 54.22  | 57.77  | 0.64  | 0 |
| Oxal  | 0.1    | 1  | 20.61  | 57.83  | 2.091 | 1 |
| Oxal  | 0.1    | 1  | 150.81 | 154.74 | 0.698 | 0 |
| Oxal  | 0.1    | 2  | 14.1   | 26.52  | 1.033 | 1 |
| Oxal  | 0.1    | 3  | 186.68 | 222.83 | 1.712 | 1 |
| Oxal  | 0.1    | 5  | 0      | 1.72   | 0.871 | 1 |
| Oxal  | 0.1    | 5  | 58.55  | 59.85  | 0.767 | 1 |
| Oxal  | 0.1    | 5  | 62.26  | 64.67  | 0.685 | 0 |
| Oxal  | 0.1    | 7  | 52.7   | 128.99 | 1.608 | 2 |
| Oxal  | 0.1    | 7  | 134.55 | 181.97 | 1.39  | 2 |
| Oxal  | 0.1    | 11 | 19.86  | 24.73  | 0.886 | 1 |
| Oxal  | 0.1    | 14 | 13.89  | 21.51  | 1.053 | 0 |
| Oxal  | 0.1    | 14 | 31.13  | 34.43  | 0.822 | 0 |
| Oxal  | 0.1    | 15 | 0      | 32.58  | 1.004 | 1 |
| Oxal  | 0.1    | 16 | 69.05  | 89.63  | 1.1   | 0 |
| Oxal  | 0.1    | 17 | 106.8  | 111.22 | 0.612 | 0 |
| Oxal  | 0.1    | 19 | 92.56  | 105.02 | 1.602 | 1 |
| Oxal  | 0.1    | 20 | 66.71  | 69.5   | 0.615 | 1 |
| Oxal  | 0.1    | 20 | 90.06  | 101.22 | 1.007 | 2 |
| Oxal  | 0.1    | 21 | 20.45  | 27.4   | 0.824 | 0 |
| Oxal  | 0.1    | 21 | 28.48  | 40.43  | 0.847 | 1 |
| Oxal  | 0.1    | 21 | 43.67  | 57.77  | 0.94  | 1 |
| Pac   | 0.0005 | 1  | 23.35  | 55.1   | 1.685 | 1 |
| Pac   | 0.0005 | 2  | 5.4    | 33.31  | 1.414 | 2 |
| Pac   | 0.0005 | 3  | 190.43 | 198.68 | 0.948 | 1 |
| Pac   | 0.0005 | 3  | 227.57 | 228.14 | 0.657 | 0 |
| Pac   | 0.0005 | 5  | 0      | 1.72   | 0.651 | 1 |
| Pac   | 0.0005 | 5  | 33.04  | 36.25  | 0.619 | 0 |
| Pac   | 0.0005 | 5  | 37.32  | 44.73  | 0.864 | 0 |
| Pac   | 0.0005 | 5  | 75.89  | 81.22  | 0.83  | 0 |
| Pac   | 0.0005 | 5  | 131.48 | 147.49 | 1.384 | 0 |
| Pac   | 0.0005 | 5  | 148.63 | 155.92 | 1.172 | 0 |
| Pac   | 0.0005 | 5  | 160.87 | 167.69 | 0.944 | 0 |
| Pac   | 0.0005 | 5  | 177.92 | 182.35 | 0.849 | 0 |
| Pac   | 0.0005 | 7  | 155.1  | 165.18 | 0.922 | 1 |
| Pac   | 0.0005 | 7  | 166.48 | 168.98 | 0.649 | 1 |
| Pac   | 0.0005 | 11 | 19.86  | 24.73  | 0.916 | 0 |
| Pac   | 0.0005 | 12 | 111.27 | 113.91 | 0.706 | 0 |
| Pac   | 0.0005 | 12 | 123    | 136.35 | 0.939 | 0 |
| Pac   | 0.0005 | 12 | 136.82 | 150.7  | 1.387 | 2 |
| Pac   | 0.0005 | 13 | 8.87   | 16.2   | 0.704 | 1 |
| Pac   | 0.0005 | 14 | 21.51  | 47.51  | 1.454 | 1 |
| Pac   | 0.0005 | 16 | 77.71  | 99.44  | 1.093 | 0 |

### Suggestive Peaks

|      |         |    |        |        |       |   |
|------|---------|----|--------|--------|-------|---|
| Pac  | 0.0005  | 16 | 120.59 | 134.12 | 1.141 | 2 |
| Pac  | 0.0005  | 17 | 0      | 26.77  | 0.925 | 0 |
| Pac  | 0.0005  | 17 | 95.99  | 99.21  | 0.698 | 0 |
| Pac  | 0.0005  | 18 | 8.3    | 41.24  | 1.067 | 0 |
| Pac  | 0.0005  | 18 | 61.17  | 66.66  | 1.448 | 1 |
| Pac  | 0.0005  | 18 | 68.3   | 74.93  | 0.817 | 1 |
| Pac  | 0.0005  | 18 | 77.36  | 80.41  | 0.667 | 0 |
| Pac  | 0.0005  | 18 | 91.62  | 96.48  | 0.797 | 0 |
| Pac  | 0.0005  | 19 | 9.84   | 15.55  | 0.721 | 1 |
| Pac  | 0.0005  | 19 | 100.01 | 105.02 | 0.72  | 1 |
| Pac  | 0.0005  | 21 | 9.72   | 40.43  | 1.685 | 0 |
| Rapa | 0.0001  | 1  | 20.61  | 29.93  | 0.999 | 1 |
| Rapa | 0.0001  | 1  | 35.4   | 37.05  | 0.682 | 0 |
| Rapa | 0.0001  | 1  | 96.04  | 113.69 | 0.81  | 0 |
| Rapa | 0.0001  | 2  | 101.02 | 119.22 | 1.222 | 1 |
| Rapa | 0.0001  | 2  | 120.29 | 121.63 | 0.67  | 0 |
| Rapa | 0.0001  | 3  | 52.6   | 55.11  | 0.657 | 1 |
| Rapa | 0.0001  | 4  | 78.97  | 83.92  | 0.686 | 0 |
| Rapa | 0.0001  | 4  | 85.18  | 112.62 | 1.164 | 0 |
| Rapa | 0.0001  | 5  | 0      | 1.72   | 0.741 | 0 |
| Rapa | 0.0001  | 5  | 57.3   | 69.23  | 1.262 | 0 |
| Rapa | 0.0001  | 6  | 88.63  | 99.01  | 0.96  | 0 |
| Rapa | 0.0001  | 6  | 100.91 | 104.08 | 0.812 | 0 |
| Rapa | 0.0001  | 6  | 104.71 | 124.11 | 1.044 | 0 |
| Rapa | 0.0001  | 7  | 168.98 | 181.97 | 1.028 | 0 |
| Rapa | 0.0001  | 8  | 111.68 | 165.93 | 1.542 | 3 |
| Rapa | 0.0001  | 9  | 159.61 | 163.84 | 0.744 | 2 |
| Rapa | 0.0001  | 19 | 0      | 15.55  | 1.016 | 0 |
| Temo | 0.125   | 1  | 113.83 | 151.11 | 1.298 | 1 |
| Temo | 0.125   | 1  | 153.59 | 170.84 | 0.931 | 0 |
| Temo | 0.125   | 1  | 194.32 | 201.58 | 0.753 | 0 |
| Temo | 0.125   | 2  | 46.9   | 53.88  | 0.647 | 0 |
| Temo | 0.125   | 2  | 72.79  | 128.41 | 1.53  | 1 |
| Temo | 0.125   | 3  | 133.93 | 149.26 | 0.885 | 1 |
| Temo | 0.125   | 5  | 172.67 | 174.8  | 0.684 | 0 |
| Temo | 0.125   | 5  | 179.11 | 179.76 | 0.605 | 0 |
| Temo | 0.125   | 8  | 92.2   | 92.58  | 0.662 | 0 |
| Temo | 0.125   | 9  | 103.42 | 104.48 | 0.61  | 0 |
| Temo | 0.125   | 9  | 106.63 | 111.99 | 0.847 | 0 |
| Temo | 0.125   | 9  | 122.23 | 123.87 | 0.762 | 0 |
| Temo | 0.125   | 9  | 127.98 | 144.13 | 1.008 | 2 |
| Temo | 0.125   | 10 | 147.57 | 149.25 | 0.641 | 1 |
| Temo | 0.125   | 14 | 0      | 47.51  | 1.308 | 3 |
| Temo | 0.125   | 14 | 57.43  | 63.25  | 0.593 | 0 |
| Temo | 0.125   | 14 | 67.99  | 80.82  | 0.883 | 1 |
| Temo | 0.125   | 20 | 0      | 31.43  | 1.688 | 3 |
| Temo | 0.125   | 20 | 32.3   | 48.61  | 1.206 | 1 |
| Teni | 0.00064 | 1  | 8.85   | 15.13  | 0.639 | 0 |
| Teni | 0.00064 | 2  | 208.58 | 238.33 | 1.394 | 2 |

### Suggestive Peaks

|      |          |    |        |        |       |   |
|------|----------|----|--------|--------|-------|---|
| Teni | 0.00064  | 4  | 140.64 | 154.63 | 0.767 | 1 |
| Teni | 0.00064  | 4  | 167.55 | 177.33 | 0.693 | 0 |
| Teni | 0.00064  | 6  | 49.5   | 65.14  | 0.776 | 1 |
| Teni | 0.00064  | 6  | 149.13 | 173.31 | 1.207 | 1 |
| Teni | 0.00064  | 7  | 143.33 | 168.98 | 0.923 | 3 |
| Teni | 0.00064  | 7  | 178.41 | 180.24 | 0.614 | 1 |
| Teni | 0.00064  | 8  | 22.17  | 37.04  | 1.404 | 1 |
| Teni | 0.00064  | 8  | 48.79  | 62.47  | 0.981 | 1 |
| Teni | 0.00064  | 11 | 50.88  | 53.56  | 0.932 | 1 |
| Teni | 0.00064  | 13 | 0      | 25.8   | 1.622 | 2 |
| Teni | 0.00064  | 13 | 26.87  | 28.04  | 0.669 | 2 |
| Teni | 0.00064  | 13 | 39.65  | 55.31  | 0.9   | 2 |
| Teni | 0.00064  | 17 | 25.14  | 41.12  | 0.843 | 0 |
| Teni | 0.00064  | 17 | 81.46  | 105.68 | 0.856 | 0 |
| Teni | 0.00064  | 19 | 52.59  | 58.69  | 1.183 | 1 |
| Teni | 0.00064  | 22 | 21.47  | 23.37  | 0.629 | 1 |
| Topo | 0.00003  | 4  | 85.18  | 88.35  | 0.708 | 1 |
| Topo | 0.00003  | 5  | 41.06  | 45.34  | 0.723 | 1 |
| Topo | 0.00003  | 5  | 63.6   | 64.67  | 0.698 | 1 |
| Topo | 0.00003  | 6  | 14.07  | 16.84  | 0.706 | 0 |
| Topo | 0.00003  | 6  | 161.59 | 164.78 | 0.73  | 0 |
| Topo | 0.00003  | 6  | 173.31 | 177.88 | 1.066 | 1 |
| Topo | 0.00003  | 7  | 89.88  | 93.1   | 0.693 | 1 |
| Topo | 0.00003  | 8  | 26.43  | 37.04  | 0.789 | 1 |
| Topo | 0.00003  | 8  | 43.41  | 45.41  | 0.618 | 0 |
| Topo | 0.00003  | 12 | 1.17   | 1.71   | 0.735 | 0 |
| Topo | 0.00003  | 12 | 6.42   | 38.5   | 1.698 | 1 |
| Topo | 0.00003  | 12 | 90.77  | 94.49  | 0.786 | 1 |
| Topo | 0.00003  | 12 | 136.82 | 155.94 | 1.347 | 1 |
| Topo | 0.00003  | 12 | 159.59 | 168.79 | 1.091 | 1 |
| Topo | 0.00003  | 13 | 0      | 12.91  | 0.947 | 1 |
| Topo | 0.00003  | 13 | 13.45  | 17.21  | 0.703 | 1 |
| Topo | 0.00003  | 13 | 19.36  | 64.97  | 1.209 | 3 |
| Topo | 0.00003  | 13 | 66.59  | 73.04  | 1.12  | 0 |
| Topo | 0.00003  | 14 | 31.13  | 34.43  | 0.756 | 0 |
| Topo | 0.00003  | 15 | 0      | 4.78   | 0.612 | 1 |
| Topo | 0.00003  | 17 | 6.6    | 10.02  | 0.691 | 1 |
| Topo | 0.00003  | 17 | 16.84  | 26.77  | 0.741 | 2 |
| Topo | 0.00003  | 18 | 9.26   | 11.21  | 0.696 | 0 |
| Topo | 0.00003  | 18 | 50.38  | 54.4   | 0.83  | 1 |
| Topo | 0.00003  | 18 | 58.45  | 77.36  | 1.677 | 2 |
| Topo | 0.00003  | 18 | 95.46  | 96.48  | 0.65  | 0 |
| Topo | 0.00003  | 19 | 94.56  | 105.02 | 1.293 | 1 |
| Vinb | 0.000005 | 1  | 274.53 | 288.29 | 0.75  | 0 |
| Vinb | 0.000005 | 2  | 14.1   | 17.88  | 0.748 | 0 |
| Vinb | 0.000005 | 2  | 76.34  | 85.48  | 1.265 | 0 |
| Vinb | 0.000005 | 4  | 183.63 | 195.6  | 0.793 | 2 |
| Vinb | 0.000005 | 7  | 155.79 | 181.97 | 2.061 | 1 |
| Vinb | 0.000005 | 8  | 0      | 10.5   | 1.041 | 0 |

### Suggestive Peaks

|      |          |    |        |        |       |   |
|------|----------|----|--------|--------|-------|---|
| Vinb | 0.000005 | 9  | 0      | 9.83   | 0.787 | 0 |
| Vinb | 0.000005 | 10 | 28.31  | 30     | 0.658 | 0 |
| Vinb | 0.000005 | 10 | 46.94  | 52.1   | 1.224 | 0 |
| Vinb | 0.000005 | 11 | 0      | 4.84   | 0.895 | 0 |
| Vinb | 0.000005 | 11 | 7.03   | 8.64   | 0.654 | 0 |
| Vinb | 0.000005 | 13 | 73.04  | 75.19  | 0.645 | 0 |
| Vinb | 0.000005 | 13 | 90.27  | 114.98 | 0.795 | 0 |
| Vinb | 0.000005 | 14 | 13.89  | 14.6   | 0.888 | 0 |
| Vinb | 0.000005 | 14 | 21.51  | 34.43  | 1.003 | 0 |
| Vinb | 0.000005 | 15 | 47.29  | 57.93  | 1.038 | 0 |
| Vinb | 0.000005 | 16 | 110.4  | 134.12 | 0.866 | 0 |
| Vinc | 0.0001   | 2  | 15.61  | 34.78  | 0.728 | 1 |
| Vinc | 0.0001   | 2  | 213.49 | 238.33 | 0.842 | 0 |
| Vinc | 0.0001   | 6  | 9.18   | 18.22  | 0.73  | 0 |
| Vinc | 0.0001   | 6  | 111.17 | 122.51 | 0.764 | 0 |
| Vinc | 0.0001   | 6  | 125.71 | 128.93 | 0.602 | 0 |
| Vinc | 0.0001   | 9  | 9.83   | 18.06  | 0.73  | 0 |
| Vinc | 0.0001   | 9  | 26.24  | 32.24  | 0.688 | 0 |
| Vinc | 0.0001   | 9  | 44.28  | 51.81  | 0.732 | 0 |
| Vinc | 0.0001   | 9  | 58.26  | 67.93  | 0.753 | 0 |
| Vinc | 0.0001   | 9  | 81.92  | 110.91 | 0.747 | 1 |
| Vinc | 0.0001   | 9  | 123.87 | 127.98 | 0.572 | 0 |
| Vinc | 0.0001   | 9  | 129.74 | 132.09 | 0.549 | 1 |
| Vinc | 0.0001   | 11 | 7.03   | 65.05  | 1.343 | 2 |
| Vinc | 0.0001   | 12 | 123    | 144.83 | 0.894 | 0 |
| Vinc | 0.0001   | 15 | 86.81  | 90.02  | 0.517 | 1 |
| Vinc | 0.0001   | 16 | 126.36 | 127.45 | 0.518 | 0 |
| Vinc | 0.0001   | 18 | 62.29  | 62.84  | 0.557 | 0 |
| Vinc | 0.0001   | 18 | 63.39  | 66.66  | 0.655 | 0 |
| Vinc | 0.0001   | 18 | 67.21  | 70.71  | 0.619 | 1 |
| Vinc | 0.0001   | 18 | 96.48  | 99.04  | 0.633 | 0 |
| Vinc | 0.0001   | 18 | 111.2  | 116.44 | 0.829 | 0 |
| Vinc | 0.0001   | 20 | 2.13   | 2.83   | 0.595 | 0 |
| Vinc | 0.0001   | 20 | 6.25   | 13.98  | 0.812 | 0 |
| Vinc | 0.0001   | 21 | 9.72   | 20.45  | 0.723 | 0 |
| Vino | 0.0002   | 1  | 0      | 4.22   | 0.587 | 0 |
| Vino | 0.0002   | 2  | 20.03  | 26.52  | 0.626 | 0 |
| Vino | 0.0002   | 2  | 37.38  | 41.57  | 0.65  | 0 |
| Vino | 0.0002   | 2  | 225.67 | 238.33 | 0.799 | 0 |
| Vino | 0.0002   | 3  | 190.43 | 201.14 | 1.169 | 1 |
| Vino | 0.0002   | 9  | 80.31  | 81.38  | 0.589 | 1 |
| Vino | 0.0002   | 9  | 81.92  | 90.4   | 0.699 | 1 |
| Vino | 0.0002   | 9  | 94.85  | 96.46  | 0.614 | 0 |
| Vino | 0.0002   | 9  | 104.48 | 105.82 | 0.605 | 0 |
| Vino | 0.0002   | 11 | 0      | 53.56  | 1.541 | 1 |
| Vino | 0.0002   | 12 | 106.52 | 109.47 | 0.608 | 0 |
| Vino | 0.0002   | 12 | 111.27 | 136.82 | 1.312 | 1 |
| Vino | 0.0002   | 12 | 144.83 | 149.6  | 0.692 | 1 |
| Vino | 0.0002   | 14 | 0      | 12.46  | 0.891 | 0 |

### Suggestive Peaks

|      |        |    |        |        |       |   |
|------|--------|----|--------|--------|-------|---|
| Vino | 0.0002 | 15 | 86.81  | 98.44  | 0.62  | 0 |
| Vino | 0.0002 | 15 | 107.71 | 122.14 | 0.777 | 0 |
| Vino | 0.0002 | 18 | 112.13 | 116.44 | 0.672 | 0 |
| Vino | 0.0002 | 19 | 85.87  | 105.02 | 0.965 | 1 |
| Vino | 0.0002 | 20 | 0      | 17.74  | 1.286 | 0 |
| Vino | 0.0002 | 21 | 11.3   | 26.6   | 0.85  | 1 |
