# Supplementary material
Source: PubMed Central journal article supplement (PMC3399590)
Supplement: NIHMS336613-supplement-figure_4.pdf [file NIHMS336613-supplement-figure_4.pdf]

Replication Peaks Highest H2

| Drug   | Dose      | Chromosome | Peak Start cM | Peak End cM | Peak LOD Score | Main Peak Indicator |
|--------|-----------|------------|---------------|-------------|----------------|---------------------|
| 5FU    | 0.022222  | 7          | 126.75        | 181.97      | 1.41           | 1                   |
| 5FU    | 0.1       | 7          | 127.82        | 128.41      | 0.621          | 0                   |
| 5FU    | 0.1       | 7          | 134.55        | 159.53      | 1.971          | 0                   |
| Arsen  | 0.04444   | 5          | 53.23         | 63.6        | 1.596          | 1                   |
| Arsen  | 0.02963   | 5          | 58.55         | 59.85       | 0.675          | 0                   |
| Arsen  | 0.02963   | 5          | 62.26         | 69.23       | 1.137          | 0                   |
| Arsen  | 0.06667   | 5          | 57.3          | 60.92       | 1.019          | 0                   |
| Bleo   | 0.01      | 2          | 216.31        | 231.27      | 1.503          | 1                   |
| Bleo   | 0.002     | 2          | 218.45        | 227.54      | 0.855          | 0                   |
| Bleo   | 0.00008   | 2          | 193.26        | 218.45      | 1.318          | 0                   |
| Busulf | 0.0125    | 7          | 160.09        | 181.97      | 1.467          | 1                   |
| Carbo  | 0.008     | 5          | 0             | 7.77        | 1.48           | 1                   |
| Carbo  | 0.00128   | 5          | 0             | 5.43        | 1.126          | 0                   |
| Carbo  | 0.0032    | 5          | 0             | 1.72        | 0.682          | 0                   |
| Carbo  | 0.02      | 5          | 0             | 7.77        | 1.412          | 0                   |
| Carbo  | 0.008     | 7          | 57.79         | 123.01      | 1.471          | 1                   |
| Carbo  | 0.0032    | 7          | 50.29         | 87.38       | 1.647          | 0                   |
| Carbo  | 0.02      | 7          | 50.29         | 122.48      | 1.854          | 0                   |
| Carbo  | 0.008     | 19         | 92.56         | 105.02      | 1.568          | 1                   |
| Carbo  | 0.0032    | 19         | 100.01        | 100.38      | 0.747          | 0                   |
| Carbo  | 0.02      | 19         | 94.56         | 105.02      | 1.761          | 0                   |
| Daun   | 0.0001    | 7          | 136.06        | 173.03      | 1.257          | 1                   |
| Daun   | 0.0000125 | 7          | 168.98        | 181.97      | 1.579          | 0                   |
| Daun   | 0.00005   | 7          | 143.33        | 149.9       | 0.957          | 0                   |
| Doc    | 0.000032  | 7          | 160.09        | 181.97      | 1.595          | 1                   |
| Doc    | 0.0002    | 7          | 159.53        | 168.98      | 0.823          | 0                   |
| Doc    | 0.00008   | 7          | 125.95        | 181.97      | 1.652          | 0                   |
| Doc    | 0.000032  | 11         | 43.16         | 60.09       | 2              | 1                   |
| Doc    | 0.0002    | 11         | 4.84          | 59.77       | 1.485          | 0                   |
| Doc    | 0.0000128 | 11         | 50.88         | 51.95       | 0.635          | 0                   |
| Dox    | 0.00005   | 15         | 0             | 34.83       | 1.108          | 1                   |
| Dox    | 0.000025  | 15         | 0             | 19.12       | 0.799          | 0                   |
| Dox    | 0.00005   | 19         | 92.56         | 105.02      | 1.338          | 1                   |
| Flox   | 0.0285714 | 3          | 186.04        | 209.41      | 2.094          | 1                   |
| Flox   | 0.0023324 | 3          | 185.4         | 203.28      | 1.941          | 0                   |
| Flox   | 0.0081633 | 3          | 187.49        | 203.28      | 1.801          | 0                   |
| Flox   | 0.1       | 3          | 187.49        | 203.28      | 1.571          | 0                   |
| Flox   | 0.0285714 | 7          | 143.33        | 181.97      | 1.521          | 1                   |
| Flox   | 0.0023324 | 7          | 148.11        | 168.98      | 1.299          | 0                   |
| Flox   | 0.0081633 | 7          | 148.11        | 173.71      | 2.013          | 0                   |
| Flox   | 0.0081633 | 7          | 175.77        | 181.97      | 0.75           | 0                   |
| Flox   | 0.1       | 7          | 145.34        | 149.9       | 0.665          | 0                   |
| Ida    | 0.0000625 | 7          | 134.55        | 170.94      | 1.839          | 1                   |
| Ida    | 0.0000123 | 7          | 140.63        | 146.28      | 0.707          | 0                   |
| Ida    | 0.0000278 | 7          | 126.75        | 168.98      | 2.285          | 0                   |
| Ida    | 0.0000625 | 19         | 92.56         | 105.02      | 1.404          | 1                   |
| Ida    | 0.0000278 | 19         | 85.87         | 105.02      | 1.965          | 0                   |
| Ida    | 0.000005  | 19         | 100.01        | 105.02      | 0.786          | 0                   |

Replication Peaks Highest H2

|       |           |    |        |        |       |   |
|-------|-----------|----|--------|--------|-------|---|
| Mitom | 0.0000333 | 11 | 33.02  | 71.6   | 2.212 | 1 |
| Mitom | 0.0001    | 11 | 54.75  | 56.76  | 0.664 | 0 |
| Mitom | 0.0000111 | 11 | 42.55  | 54.09  | 1.388 | 0 |
| Oxal  | 0.1       | 1  | 20.61  | 57.83  | 2.091 | 1 |
| Oxal  | 0.0333333 | 1  | 29.93  | 38.51  | 1.131 | 0 |
| Oxal  | 0.0333333 | 1  | 41.92  | 50.28  | 0.872 | 0 |
| Oxal  | 0.0333333 | 1  | 56.19  | 62.74  | 1.118 | 0 |
| Oxal  | 0.1       | 3  | 186.68 | 222.83 | 1.712 | 1 |
| Oxal  | 0.0333333 | 3  | 180.8  | 228.14 | 2.179 | 0 |
| Pac   | 0.0005    | 1  | 23.35  | 55.1   | 1.685 | 1 |
| Pac   | 0.0001667 | 1  | 8.85   | 65.47  | 1.921 | 0 |
| Pac   | 0.0005    | 21 | 9.72   | 40.43  | 1.685 | 1 |
| Rapa  | 0.0001    | 8  | 111.68 | 165.93 | 1.542 | 1 |
| Rapa  | 0.001     | 8  | 156.59 | 165.93 | 0.651 | 0 |
| Rapa  | 0.00001   | 8  | 117.62 | 118.15 | 0.715 | 0 |
| Rapa  | 0.00001   | 8  | 119.22 | 121.9  | 0.753 | 0 |
| Rapa  | 0.000001  | 8  | 148.12 | 153.48 | 0.806 | 0 |
| Temo  | 0.125     | 2  | 72.79  | 128.41 | 1.53  | 1 |
| Temo  | 0.25      | 2  | 64.84  | 73.61  | 0.776 | 0 |
| Temo  | 0.125     | 14 | 0      | 47.51  | 1.308 | 1 |
| Temo  | 0.25      | 14 | 8.28   | 47.51  | 1.29  | 0 |
| Temo  | 0.5       | 14 | 31.13  | 47.51  | 1.074 | 0 |
| Temo  | 1         | 14 | 13.89  | 47.51  | 1.513 | 0 |
| Temo  | 0.125     | 20 | 0      | 31.43  | 1.688 | 1 |
| Temo  | 0.25      | 20 | 0      | 26.13  | 1.205 | 0 |
| Temo  | 0.5       | 20 | 0      | 7.61   | 0.889 | 0 |
| Temo  | 1         | 20 | 8.97   | 9.53   | 0.652 | 0 |
| Teni  | 0.00064   | 13 | 0      | 25.8   | 1.622 | 1 |
| Teni  | 0.0016    | 13 | 0      | 55.31  | 1.221 | 0 |
| Teni  | 0.004     | 13 | 0      | 55.31  | 1.328 | 0 |
| Topo  | 0.00003   | 12 | 6.42   | 38.5   | 1.698 | 1 |
| Topo  | 0.000014  | 12 | 4.64   | 34.85  | 1.282 | 0 |
| Topo  | 0.00003   | 18 | 58.45  | 77.36  | 1.677 | 1 |
| Topo  | 0.000014  | 18 | 61.17  | 66.66  | 1.054 | 0 |
| Topo  | 0.000014  | 18 | 67.21  | 70.71  | 0.708 | 0 |
| Topo  | 0.000003  | 18 | 70.71  | 71.32  | 0.685 | 0 |
| Vinb  | 0.000005  | 7  | 155.79 | 181.97 | 2.061 | 1 |
| Vinb  | 0.00001   | 7  | 155.79 | 160.09 | 0.685 | 0 |
| Vinb  | 0.00001   | 7  | 168.98 | 173.03 | 0.855 | 0 |
| Vinb  | 0.00001   | 7  | 175.77 | 181.97 | 1.006 | 0 |
| Vinc  | 0.0001    | 11 | 7.03   | 65.05  | 1.343 | 1 |
| Vinc  | 0.000025  | 11 | 2.11   | 19.86  | 0.83  | 0 |
| Vinc  | 0.000025  | 11 | 29.18  | 30.88  | 0.607 | 0 |
| Vinc  | 0.00005   | 11 | 51.42  | 53.02  | 0.76  | 0 |
| Vino  | 0.0002    | 11 | 0      | 53.56  | 1.541 | 1 |
| Vino  | 0.0001333 | 11 | 51.95  | 54.75  | 0.783 | 0 |

Replication Peaks NonHighest H2

| Drug   | Dose     | Chromosome | Peak Start cM | Peak End cM | Peak LOD Score | Main Peak Indicator |
|--------|----------|------------|---------------|-------------|----------------|---------------------|
| 5FU    | 0.004938 | 3          | 189           | 222.83      | 1.648          | 1                   |
| 5FU    | 0.001097 | 3          | 201.14        | 203.28      | 0.689          | 0                   |
| 5FU    | 0.1      | 7          | 134.55        | 159.53      | 1.971          | 1                   |
| 5FU    | 0.022222 | 7          | 126.75        | 181.97      | 1.41           | 0                   |
| 5FU    | 0.004938 | 9          | 79.06         | 100.74      | 1.5            | 1                   |
| 5FU    | 0.022222 | 9          | 88.92         | 91.87       | 0.724          | 0                   |
| 5FU    | 0.004938 | 14         | 0             | 25.87       | 1.728          | 1                   |
| 5FU    | 0.022222 | 14         | 0             | 25.87       | 1.202          | 0                   |
| 5FU    | 0.1      | 14         | 0             | 25.87       | 1.372          | 0                   |
| 5FU    | 0.1      | 19         | 92.56         | 105.02      | 1.713          | 1                   |
| 5FU    | 0.022222 | 19         | 100.01        | 105.02      | 0.996          | 0                   |
| Arsen  | 0.02963  | 3          | 158.38        | 218.66      | 1.865          | 1                   |
| Arsen  | 0.02963  | 3          | 158.38        | 222.83      | 1.865          | 0                   |
| Arsen  | 0.06667  | 3          | 212.61        | 228.14      | 1.093          | 0                   |
| Arsen  | 0.1      | 3          | 181.87        | 189         | 0.724          | 0                   |
| Arsen  | 0.1      | 3          | 205.56        | 214.45      | 0.996          | 0                   |
| Arsen  | 0.06667  | 5          | 119.5         | 144.06      | 1.6            | 1                   |
| Arsen  | 0.02963  | 5          | 140.72        | 142.92      | 0.832          | 0                   |
| Arsen  | 0.1      | 5          | 133.65        | 144.06      | 0.878          | 0                   |
| Arsen  | 0.1      | 19         | 64.7          | 79.48       | 1.547          | 1                   |
| Arsen  | 0.06667  | 19         | 65.77         | 68.08       | 0.755          | 0                   |
| Arsen  | 0.06667  | 19         | 69.5          | 75.41       | 0.779          | 0                   |
| Aza    | 0.004375 | 18         | 63.39         | 74.93       | 1.896          | 1                   |
| Bleo   | 0.0004   | 7          | 15.27         | 54.11       | 1.929          | 1                   |
| Bleo   | 0.002    | 7          | 27.66         | 36.03       | 0.725          | 0                   |
| Bleo   | 0.002    | 7          | 37.26         | 70.64       | 1.475          | 0                   |
| Bleo   | 0.01     | 7          | 27.66         | 33.05       | 0.728          | 0                   |
| Bleo   | 0.01     | 7          | 40.62         | 54.84       | 1.305          | 0                   |
| Bleo   | 0.0004   | 7          | 148.11        | 181.97      | 1.635          | 1                   |
| Bleo   | 0.002    | 7          | 143.33        | 159.53      | 0.987          | 0                   |
| Bleo   | 0.002    | 7          | 160.09        | 161.21      | 0.647          | 0                   |
| Bleo   | 0.01     | 7          | 144.72        | 149.9       | 0.75           | 0                   |
| Bleo   | 0.00008  | 7          | 166.48        | 169.81      | 0.755          | 0                   |
| Bleo   | 0.00008  | 7          | 170.94        | 181.97      | 0.801          | 0                   |
| Bleo   | 0.0004   | 8          | 101.69        | 116.14      | 1.55           | 1                   |
| Bleo   | 0.00008  | 8          | 101.69        | 113.16      | 1.469          | 0                   |
| Bleo   | 0.0004   | 16         | 69.05         | 97.03       | 1.471          | 1                   |
| Bleo   | 0.002    | 16         | 73.2          | 81.15       | 0.772          | 0                   |
| Bleo   | 0.01     | 16         | 79.43         | 81.15       | 0.661          | 0                   |
| Bleo   | 0.01     | 16         | 81.95         | 84.75       | 0.631          | 0                   |
| Bleo   | 0.00008  | 16         | 70.69         | 99.44       | 1.385          | 0                   |
| Busulf | 0.05     | 5          | 33.04         | 58.55       | 2.014          | 1                   |
| Busulf | 0.05     | 5          | 29.52         | 59.3        | 2.014          | 0                   |
| Busulf | 0.025    | 9          | 135.85        | 163.84      | 2.264          | 1                   |
| Busulf | 0.05     | 9          | 150.92        | 159.61      | 0.682          | 0                   |
| Busulf | 0.1      | 21         | 0             | 36.77       | 2.515          | 1                   |
| Carbo  | 0.0032   | 2          | 90.82         | 142.83      | 1.701          | 1                   |
| Carbo  | 0.008    | 2          | 90.82         | 119.22      | 1.02           | 0                   |
| Carbo  | 0.008    | 2          | 120.29        | 124.03      | 0.726          | 0                   |
| Carbo  | 0.008    | 2          | 129.79        | 130.37      | 0.583          | 0                   |
| Carbo  | 0.008    | 2          | 131.51        | 132.58      | 0.608          | 0                   |
| Carbo  | 0.02     | 2          | 95.67         | 99.41       | 0.608          | 0                   |
| Carbo  | 0.02     | 2          | 137.93        | 146.15      | 0.853          | 0                   |
| Carbo  | 0.00128  | 5          | 0             | 5.43        | 1.126          | 1                   |

Replication Peaks NonHighest H2

|       |           |    |        |        |       |   |
|-------|-----------|----|--------|--------|-------|---|
| Carbo | 0.0032    | 5  | 0      | 1.72   | 0.682 | 0 |
| Carbo | 0.008     | 5  | 0      | 7.77   | 1.48  | 0 |
| Carbo | 0.02      | 5  | 0      | 7.77   | 1.412 | 0 |
| Carbo | 0.0032    | 7  | 50.29  | 87.38  | 1.647 | 1 |
| Carbo | 0.008     | 7  | 57.79  | 123.01 | 1.471 | 0 |
| Carbo | 0.02      | 7  | 50.29  | 122.48 | 1.854 | 0 |
| Carbo | 0.02      | 7  | 50.29  | 122.48 | 1.854 | 1 |
| Carbo | 0.0032    | 7  | 50.29  | 87.38  | 1.647 | 0 |
| Carbo | 0.008     | 7  | 57.79  | 123.01 | 1.471 | 0 |
| Carbo | 0.00128   | 8  | 75.39  | 122.96 | 1.325 | 1 |
| Carbo | 0.02      | 14 | 0      | 34.43  | 1.643 | 1 |
| Carbo | 0.008     | 14 | 8.28   | 13.89  | 0.906 | 0 |
| Carbo | 0.02      | 19 | 94.56  | 105.02 | 1.761 | 1 |
| Carbo | 0.0032    | 19 | 100.01 | 100.38 | 0.747 | 0 |
| Carbo | 0.008     | 19 | 92.56  | 105.02 | 1.568 | 0 |
| Clad  | 0.00064   | 1  | 33.75  | 50.28  | 1.063 | 1 |
| Clad  | 0.00064   | 15 | 0      | 43.47  | 1.076 | 1 |
| Clad  | 0.0016    | 15 | 19.12  | 28.35  | 0.707 | 0 |
| Clad  | 0.0016    | 15 | 39.72  | 45.62  | 0.713 | 0 |
| Clad  | 0.004     | 15 | 19.12  | 28.35  | 0.808 | 0 |
| Clad  | 0.004     | 15 | 39.72  | 45.62  | 0.671 | 0 |
| Clad  | 0.01      | 15 | 43.47  | 47.29  | 0.699 | 0 |
| Daun  | 0.00005   | 13 | 0      | 32.9   | 1.362 | 1 |
| Daun  | 0.0001    | 13 | 19.36  | 61.17  | 0.713 | 0 |
| Doc   | 0.0002    | 1  | 23.35  | 64.38  | 1.341 | 1 |
| Doc   | 0.00008   | 1  | 0      | 23.35  | 1.231 | 0 |
| Doc   | 0.00008   | 1  | 38.51  | 64.38  | 0.858 | 0 |
| Doc   | 0.00008   | 1  | 164.09 | 194.89 | 1.623 | 1 |
| Doc   | 0.000032  | 1  | 168.52 | 175.03 | 0.987 | 0 |
| Doc   | 0.000032  | 1  | 191.52 | 194.89 | 0.705 | 0 |
| Doc   | 0.00008   | 7  | 125.95 | 181.97 | 1.652 | 1 |
| Doc   | 0.0002    | 7  | 159.53 | 168.98 | 0.823 | 0 |
| Doc   | 0.000032  | 7  | 160.09 | 181.97 | 1.595 | 0 |
| Doc   | 0.0002    | 11 | 4.84   | 59.77  | 1.485 | 1 |
| Doc   | 0.0000128 | 11 | 50.88  | 51.95  | 0.635 | 0 |
| Doc   | 0.000032  | 11 | 43.16  | 60.09  | 2     | 0 |
| Dox   | 0.000025  | 4  | 176.19 | 203.77 | 1.47  | 1 |
| Dox   | 0.000013  | 4  | 175.62 | 192.12 | 0.868 | 0 |
| Dox   | 0.000006  | 4  | 181.36 | 187.64 | 0.703 | 0 |
| Epi   | 0.0001    | 7  | 126.75 | 166.48 | 1.443 | 1 |
| Epi   | 0.0004    | 7  | 105.39 | 129.58 | 0.981 | 0 |
| Epi   | 0.0004    | 7  | 130.17 | 149.9  | 1.156 | 0 |
| Epi   | 0.0000063 | 16 | 70.69  | 90.65  | 1.536 | 1 |
| Epi   | 0.0004    | 16 | 84.75  | 125.82 | 0.986 | 0 |
| Epi   | 0.0000063 | 18 | 0      | 35.46  | 1.907 | 1 |
| Etop  | 0.000408  | 6  | 32.62  | 113.03 | 1.493 | 1 |
| Etop  | 0.000117  | 11 | 108.59 | 146.6  | 1.186 | 1 |
| Etop  | 0.001429  | 14 | 21.51  | 44.06  | 1.454 | 1 |
| Etop  | 0.000408  | 14 | 21.51  | 34.43  | 0.936 | 0 |
| Etop  | 0.005     | 14 | 13.89  | 42.81  | 1.496 | 0 |
| Etop  | 0.001429  | 18 | 58.45  | 76.15  | 1.356 | 1 |
| Etop  | 0.000408  | 18 | 71.32  | 74.93  | 0.689 | 0 |
| Etop  | 0.005     | 18 | 64.48  | 74.93  | 0.956 | 0 |
| Flox  | 0.0023324 | 3  | 185.4  | 203.28 | 1.941 | 1 |
| Flox  | 0.0081633 | 3  | 187.49 | 203.28 | 1.801 | 0 |

Replication Peaks NonHighest H2

|        |           |    |        |        |       |   |
|--------|-----------|----|--------|--------|-------|---|
| Flox   | 0.0285714 | 3  | 186.04 | 209.41 | 2.094 | 0 |
| Flox   | 0.1       | 3  | 187.49 | 203.28 | 1.571 | 0 |
| Flox   | 0.0081633 | 3  | 187.49 | 203.28 | 1.801 | 1 |
| Flox   | 0.0023324 | 3  | 185.4  | 203.28 | 1.941 | 0 |
| Flox   | 0.0285714 | 3  | 186.04 | 209.41 | 2.094 | 0 |
| Flox   | 0.1       | 3  | 187.49 | 203.28 | 1.571 | 0 |
| Flox   | 0.1       | 3  | 187.49 | 203.28 | 1.571 | 1 |
| Flox   | 0.0023324 | 3  | 185.4  | 203.28 | 1.941 | 0 |
| Flox   | 0.0081633 | 3  | 187.49 | 203.28 | 1.801 | 0 |
| Flox   | 0.0285714 | 3  | 186.04 | 209.41 | 2.094 | 0 |
| Flox   | 0.0081633 | 7  | 148.11 | 173.71 | 2.013 | 1 |
| Flox   | 0.0023324 | 7  | 148.11 | 168.98 | 1.299 | 0 |
| Flox   | 0.0285714 | 7  | 143.33 | 181.97 | 1.521 | 0 |
| Flox   | 0.1       | 7  | 145.34 | 149.9  | 0.665 | 0 |
| Hydrox | 0.3       | 3  | 198.68 | 228.14 | 1.602 | 1 |
| Hydrox | 0.075     | 3  | 212.61 | 213.64 | 0.672 | 0 |
| Hydrox | 0.15      | 3  | 203.28 | 207.73 | 0.954 | 0 |
| Hydrox | 0.15      | 3  | 210.09 | 217.24 | 0.825 | 0 |
| Hydrox | 0.15      | 3  | 218.66 | 227.57 | 0.87  | 0 |
| Hydrox | 0.0375    | 19 | 92.56  | 105.02 | 1.702 | 1 |
| Hydrox | 0.075     | 19 | 94.56  | 105.02 | 1.702 | 0 |
| Hydrox | 0.15      | 19 | 94.56  | 105.02 | 1.608 | 0 |
| Hydrox | 0.3       | 19 | 100.01 | 105.02 | 0.769 | 0 |
| Hydrox | 0.075     | 19 | 94.56  | 105.02 | 1.702 | 1 |
| Hydrox | 0.0375    | 19 | 92.56  | 105.02 | 1.702 | 0 |
| Hydrox | 0.15      | 19 | 94.56  | 105.02 | 1.608 | 0 |
| Hydrox | 0.3       | 19 | 100.01 | 105.02 | 0.769 | 0 |
| Hydrox | 0.075     | 20 | 79.91  | 101.22 | 1.623 | 1 |
| Hydrox | 0.15      | 20 | 90.06  | 101.22 | 0.815 | 0 |
| Hydrox | 0.3       | 20 | 78.29  | 86.98  | 0.871 | 0 |
| Hydrox | 0.3       | 20 | 90.06  | 101.22 | 1.259 | 0 |
| Ida    | 0.0000278 | 7  | 126.75 | 168.98 | 2.285 | 1 |
| Ida    | 0.0000123 | 7  | 140.63 | 146.28 | 0.707 | 0 |
| Ida    | 0.0000625 | 7  | 134.55 | 170.94 | 1.839 | 0 |
| Ida    | 0.0000123 | 9  | 84.9   | 120.04 | 1.643 | 1 |
| Ida    | 0.0000278 | 19 | 85.87  | 105.02 | 1.965 | 1 |
| Ida    | 0.000005  | 19 | 100.01 | 105.02 | 0.786 | 0 |
| Ida    | 0.0000625 | 19 | 92.56  | 105.02 | 1.404 | 0 |
| Mitox  | 0.0000111 | 19 | 34.25  | 58.69  | 1.787 | 1 |
| Mitox  | 0.0000333 | 19 | 47.31  | 58.69  | 1.326 | 0 |
| Mitox  | 0.0000037 | 19 | 54.01  | 58.69  | 0.753 | 0 |
| Oxal   | 0.0037037 | 2  | 200.43 | 251.94 | 1.511 | 1 |
| Oxal   | 0.0111111 | 2  | 224.33 | 247.85 | 1.135 | 0 |
| Oxal   | 0.0333333 | 3  | 183.47 | 228.14 | 2.179 | 1 |
| Oxal   | 0.0333333 | 3  | 180.8  | 228.14 | 2.179 | 0 |
| Oxal   | 0.1       | 3  | 186.68 | 222.83 | 1.712 | 0 |
| Oxal   | 0.0333333 | 7  | 103.63 | 129.58 | 1.857 | 1 |
| Oxal   | 0.1       | 7  | 52.7   | 128.99 | 1.608 | 0 |
| Oxal   | 0.0037037 | 11 | 56.76  | 93.12  | 1.229 | 1 |
| Oxal   | 0.0111111 | 11 | 86.98  | 100.05 | 1.334 | 0 |
| Oxal   | 0.0111111 | 11 | 86.98  | 100.05 | 1.334 | 1 |
| Oxal   | 0.0037037 | 11 | 56.76  | 93.12  | 1.229 | 0 |
| Oxal   | 0.0111111 | 20 | 32.94  | 54.09  | 1.559 | 1 |
| Pac    | 0.0001667 | 1  | 8.85   | 65.47  | 1.921 | 1 |
| Pac    | 0.0005    | 1  | 23.35  | 55.1   | 1.685 | 0 |

Replication Peaks NonHighest H2

|      |           |    |        |        |       |   |
|------|-----------|----|--------|--------|-------|---|
| Rapa | 0.001     | 7  | 74.38  | 86.12  | 1.476 | 1 |
| Rapa | 0.000001  | 7  | 72.78  | 74.38  | 0.778 | 0 |
| Rapa | 0.000001  | 7  | 76.71  | 78.65  | 0.736 | 0 |
| Rapa | 0.000001  | 7  | 85.32  | 97.38  | 0.634 | 0 |
| Rapa | 0.00001   | 15 | 67.85  | 107.71 | 1.705 | 1 |
| Temo | 1         | 16 | 75.34  | 99.44  | 1.562 | 1 |
| Temo | 0.5       | 19 | 85.87  | 105.02 | 1.396 | 1 |
| Temo | 1         | 19 | 92.56  | 105.02 | 1.536 | 0 |
| Teni | 0.000256  | 7  | 159.53 | 181.97 | 1.887 | 1 |
| Teni | 0.00064   | 7  | 143.33 | 168.98 | 0.923 | 0 |
| Teni | 0.00064   | 7  | 178.41 | 180.24 | 0.614 | 0 |
| Teni | 0.004     | 7  | 135.31 | 166.48 | 1.97  | 0 |
| Teni | 0.004     | 7  | 135.31 | 166.48 | 1.97  | 1 |
| Teni | 0.000256  | 7  | 159.53 | 181.97 | 1.887 | 0 |
| Teni | 0.00064   | 7  | 143.33 | 168.98 | 0.923 | 0 |
| Teni | 0.0016    | 7  | 143.33 | 146.28 | 0.639 | 0 |
| Teni | 0.0016    | 12 | 9.52   | 30.6   | 1.499 | 1 |
| Teni | 0.004     | 12 | 0      | 32.48  | 1.486 | 0 |
| Topo | 0.000014  | 7  | 74.38  | 97.38  | 1.842 | 1 |
| Topo | 0.00003   | 7  | 89.88  | 93.1   | 0.693 | 0 |
| Topo | 0.000014  | 12 | 136.82 | 168.79 | 1.624 | 1 |
| Topo | 0.00003   | 12 | 136.82 | 155.94 | 1.347 | 0 |
| Topo | 0.00003   | 12 | 159.59 | 168.79 | 1.091 | 0 |
| Topo | 0.000014  | 16 | 75.34  | 113.52 | 1.665 | 1 |
| Topo | 0.000006  | 17 | 57.71  | 80.38  | 1.474 | 1 |
| Topo | 0.000003  | 17 | 53.41  | 64.16  | 1.093 | 0 |
| Topo | 0.000003  | 17 | 66.85  | 76.18  | 0.637 | 0 |
| Topo | 0.000003  | 17 | 80.38  | 81.46  | 0.637 | 0 |
| Vinb | 0.00001   | 1  | 204.51 | 242.34 | 1.596 | 1 |
| Vinb | 0.00002   | 2  | 1.95   | 14.1   | 1.59  | 1 |
| Vinb | 0.000005  | 2  | 14.1   | 17.88  | 0.748 | 0 |
| Vinb | 0.00002   | 20 | 55.74  | 77.75  | 2.08  | 1 |
| Vinc | 0.00005   | 15 | 80.04  | 107.71 | 1.524 | 1 |
| Vinc | 0.0001    | 15 | 86.81  | 90.02  | 0.517 | 0 |
| Vinc | 0.00005   | 20 | 38.72  | 79.91  | 1.858 | 1 |
| Vino | 0.0000889 | 12 | 6.42   | 30.6   | 1.581 | 1 |
| Vino | 0.0000593 | 12 | 0      | 15.69  | 1.019 | 0 |
| Vino | 0.0000889 | 12 | 120.7  | 155.94 | 1.685 | 1 |
| Vino | 0.0002    | 12 | 111.27 | 136.82 | 1.312 | 0 |
| Vino | 0.0002    | 12 | 144.83 | 149.6  | 0.692 | 0 |
| Vino | 0.0000889 | 18 | 64.48  | 77.36  | 1.588 | 1 |
| Vino | 0.0000593 | 18 | 68.3   | 70.71  | 0.791 | 0 |
