# Supplementary material
Source: PubMed Central journal article supplement (PMC3399590)
Supplement: NIHMS336613-supplement-figure_5.pdf [file NIHMS336613-supplement-figure_5.pdf]

| <u>Drug Name</u> | <u>Abbreviation</u> | <u>Vehicle</u> | <u>Mechanistic class</u> | <u>Mechanism of action</u>                       | <u>Dose 1 (mM)</u> | <u>Dose 2 (mM)</u> | <u>Dose 3 (mM)</u> | <u>Dose 4 (mM)</u> |
|------------------|---------------------|----------------|--------------------------|--------------------------------------------------|--------------------|--------------------|--------------------|--------------------|
| Cladribine       | Clad                | 0.1% DMSO      | Purine analog            | Ribonucleotide reductase inhibitor               | 6.40E-04           | 1.60E-03           | 4.00E-03           | 1.00E-02           |
| Fludarabine      | Flud                | 0.1% DMSO      | Purine analog            | Ribonucleotide reductase inhibitor               | 6.40E-03           | 1.60E-02           | 4.00E-02           | 1.00E-01           |
| Gemcitabine      | Gem                 | 0.1% DMSO      | Pyrimidine analog        | Ribonucleotide reductase inhibitor               | 2.50E-06           | 5.00E-06           | 1.00E-05           | 2.00E-05           |
| Azacitidine      | Aza                 | 0.1% DMSO      | Pyrimidine analog        | Ribonucleotide reductase inhibitor               | 4.38E-03           | 1.09E-02           | 2.73E-02           | 6.84E-02           |
| Cytarabine       | Cytar               | H2O            | Pyrimidine analog        | Ribonucleotide reductase inhibitor               | 1.17E-04           | 4.08E-04           | 1.43E-03           | 5.00E-03           |
| 5-Fluorouracil   | 5FU                 | 0.1% DMSO      | Pyrimidine analog        | Thymidylate synthase inhibitor                   | 1.10E-03           | 4.94E-03           | 2.22E-02           | 1.00E-01           |
| Floxuridine      | Flox                | 0.1% DMSO      | Pyrimidine analog        | Thymidylate synthase inhibitor                   | 2.33E-03           | 8.16E-03           | 2.86E-02           | 1.00E-01           |
| Epirubicin       | Epi                 | H2O            | Anthracyclines           | DNA intercalators and topoisomerase 2 inhibitors | 6.30E-06           | 2.50E-05           | 1.00E-04           | 4.00E-04           |
| Doxorubicin      | Dox                 | H2O            | Anthracyclines           | DNA intercalators and topoisomerase 2 inhibitors | 6.00E-06           | 1.30E-05           | 2.50E-05           | 5.00E-05           |
| Daurorubicin     | Daun                | H2O            | Anthracyclines           | DNA intercalators and topoisomerase 2 inhibitors | 1.25E-05           | 2.50E-05           | 5.00E-05           | 1.00E-04           |
| Idarubicin       | Ida                 | H2O            | Anthracyclines           | DNA intercalators and topoisomerase 2 inhibitors | 5.00E-06           | 1.23E-05           | 2.78E-05           | 6.25E-05           |
| Mitoxantrone     | Mitox               | 0.1% DMSO      | Anthracenedione          | DNA intercalators and topoisomerase 2 inhibitors | 3.70E-06           | 1.11E-05           | 3.33E-05           | 1.00E-04           |
| Vincristine      | Vinc                | 0.1% DMSO      | Vinca alkaloid           | DNA intercalators and topoisomerase 2 inhibitors | 1.25E-05           | 2.50E-05           | 5.00E-05           | 1.00E-04           |
| Vinorelbine      | Vino                | H2O            | Vinca alkaloid           | Microtubule destabilizers                        | 5.93E-05           | 8.89E-05           | 1.33E-04           | 2.00E-04           |
| Vinblastine      | Vinb                | H2O            | Vinca alkaloid           | Microtubule destabilizers                        | 5.00E-06           | 1.00E-05           | 2.00E-05           | 4.00E-05           |
| Docetaxel        | Doc                 | 0.1% DMSO      | Taxane                   | Microtubule stabilizers                          | 1.28E-05           | 3.20E-05           | 8.00E-05           | 2.00E-04           |
| Paclitaxel       | Pac                 | 1% DMSO        | Taxane                   | Microtubule stabilizers                          | 1.85E-05           | 5.56E-05           | 1.67E-04           | 5.00E-04           |
| Oxaliplatin      | Oxal                | 1% DMSO        | Platinum analog          | DNA crosslinkers                                 | 3.70E-03           | 1.11E-02           | 3.33E-02           | 1.00E-01           |
| Carboplatin      | Carbo               | H2O            | Platinum analog          | DNA crosslinkers                                 | 1.28E-03           | 3.20E-03           | 8.00E-03           | 2.00E-02           |
| Etoposide        | Etop                | 0.1% DMSO      | Epipodophylotoxin        | Topoisomerase 2 inhibitors                       | 1.17E-04           | 4.08E-04           | 1.43E-03           | 5.00E-03           |
| Teniposide       | Teni                | 0.1% DMSO      | Epipodophylotoxin        | Topoisomerase 2 inhibitors                       | 2.56E-04           | 6.40E-04           | 1.60E-03           | 4.00E-03           |
| Arsenic trioxide | Arsen               | H2O            | Arsenate                 | Other                                            | 2.96E-02           | 4.44E-02           | 6.67E-02           | 1.00E-01           |
| Bleomycin        | Bleo                | 1% DMSO        | Streptomyces             | Other                                            | 8.00E-05           | 4.00E-04           | 2.00E-03           | 1.00E-02           |
| Busulfan         | Busulf              | H2O            | Alkyl sulfonate          | Other                                            | 1.25E-02           | 2.50E-02           | 5.00E-02           | 1.00E-01           |
| Hydroxyurea      | Hydrox              | H2O            | Deoxyribonucleotide      | Other                                            | 3.75E-02           | 7.50E-02           | 1.50E-01           | 3.00E-01           |
| Mitomycin        | Mitom               | 0.1% DMSO      | Streptomyces             | Other                                            | 1.11E-05           | 3.33E-05           | 1.00E-04           | 3.00E-04           |
| Rapamycin        | Rapa                | 1% DMSO        | mTOR inhibitor           | Other                                            | 1.00E-06           | 1.00E-05           | 1.00E-04           | 1.00E-03           |
| Temozolomide     | Temo                | 1% DMSO        | Tiazenes                 | Other                                            | 1.25E-01           | 2.50E-01           | 5.00E-01           | 1.00E+00           |
| Topotecan        | Topo                | 0.1% DMSO      | Camptothecin             | Other                                            | 3.00E-06           | 6.00E-06           | 1.40E-05           | 3.00E-05           |
