# Supplementary material
Source: PubMed Central journal article supplement (PMC3399590)
Supplement: NIHMS336613-supplement-figure_7.pdf [file NIHMS336613-supplement-figure_7.pdf]

| Drug | Dose (mM) | Chromosome | Significant Peak Threshold | Suggestive Peak Threshold | Region Definition Lower Threshold |
|------|-----------|------------|----------------------------|---------------------------|-----------------------------------|
| 5FU  | 0.001097  | 1          | 1.448                      | 0.6                       | 0.6                               |
| 5FU  | 0.001097  | 2          | 1.51                       | 0.623                     | 0.623                             |
| 5FU  | 0.001097  | 3          | 1.537                      | 0.62                      | 0.62                              |
| 5FU  | 0.001097  | 4          | 1.51                       | 0.605                     | 0.605                             |
| 5FU  | 0.001097  | 5          | 1.606                      | 0.61                      | 0.61                              |
| 5FU  | 0.001097  | 6          | 1.532                      | 0.618                     | 0.618                             |
| 5FU  | 0.001097  | 7          | 1.517                      | 0.616                     | 0.616                             |
| 5FU  | 0.001097  | 8          | 1.517                      | 0.623                     | 0.623                             |
| 5FU  | 0.001097  | 9          | 1.487                      | 0.626                     | 0.626                             |
| 5FU  | 0.001097  | 10         | 1.575                      | 0.622                     | 0.622                             |
| 5FU  | 0.001097  | 11         | 1.502                      | 0.626                     | 0.626                             |
| 5FU  | 0.001097  | 12         | 1.534                      | 0.619                     | 0.619                             |
| 5FU  | 0.001097  | 13         | 1.488                      | 0.618                     | 0.618                             |
| 5FU  | 0.001097  | 14         | 1.594                      | 0.617                     | 0.617                             |
| 5FU  | 0.001097  | 15         | 1.496                      | 0.626                     | 0.626                             |
| 5FU  | 0.001097  | 16         | 1.497                      | 0.619                     | 0.619                             |
| 5FU  | 0.001097  | 17         | 1.601                      | 0.61                      | 0.61                              |
| 5FU  | 0.001097  | 18         | 1.586                      | 0.629                     | 0.629                             |
| 5FU  | 0.001097  | 19         | 1.578                      | 0.614                     | 0.614                             |
| 5FU  | 0.001097  | 20         | 1.574                      | 0.615                     | 0.615                             |
| 5FU  | 0.001097  | 21         | 1.466                      | 0.608                     | 0.608                             |
| 5FU  | 0.001097  | 22         | 1.451                      | 0.611                     | 0.611                             |
| 5FU  | 0.004938  | 1          | 1.397                      | 0.603                     | 0.603                             |
| 5FU  | 0.004938  | 2          | 1.45                       | 0.617                     | 0.617                             |
| 5FU  | 0.004938  | 3          | 1.495                      | 0.615                     | 0.615                             |
| 5FU  | 0.004938  | 4          | 1.47                       | 0.617                     | 0.617                             |
| 5FU  | 0.004938  | 5          | 1.596                      | 0.615                     | 0.615                             |
| 5FU  | 0.004938  | 6          | 1.48                       | 0.619                     | 0.619                             |
| 5FU  | 0.004938  | 7          | 1.445                      | 0.619                     | 0.619                             |
| 5FU  | 0.004938  | 8          | 1.497                      | 0.624                     | 0.624                             |
| 5FU  | 0.004938  | 9          | 1.499                      | 0.62                      | 0.62                              |
| 5FU  | 0.004938  | 10         | 1.499                      | 0.626                     | 0.626                             |
| 5FU  | 0.004938  | 11         | 1.446                      | 0.627                     | 0.627                             |
| 5FU  | 0.004938  | 12         | 1.491                      | 0.634                     | 0.634                             |
| 5FU  | 0.004938  | 13         | 1.44                       | 0.618                     | 0.618                             |
| 5FU  | 0.004938  | 14         | 1.537                      | 0.612                     | 0.612                             |
| 5FU  | 0.004938  | 15         | 1.451                      | 0.603                     | 0.603                             |
| 5FU  | 0.004938  | 16         | 1.418                      | 0.596                     | 0.596                             |
| 5FU  | 0.004938  | 17         | 1.543                      | 0.612                     | 0.612                             |
| 5FU  | 0.004938  | 18         | 1.502                      | 0.633                     | 0.633                             |
| 5FU  | 0.004938  | 19         | 1.53                       | 0.622                     | 0.622                             |
| 5FU  | 0.004938  | 20         | 1.505                      | 0.627                     | 0.627                             |
| 5FU  | 0.004938  | 21         | 1.409                      | 0.617                     | 0.617                             |
| 5FU  | 0.004938  | 22         | 1.412                      | 0.604                     | 0.604                             |
| 5FU  | 0.022222  | 1          | 1.289                      | 0.578                     | 0.578                             |
| 5FU  | 0.022222  | 2          | 1.326                      | 0.583                     | 0.583                             |
| 5FU  | 0.022222  | 3          | 1.394                      | 0.596                     | 0.596                             |

|       |          |    |       |       |       |
|-------|----------|----|-------|-------|-------|
| 5FU   | 0.022222 | 4  | 1.377 | 0.599 | 0.599 |
| 5FU   | 0.022222 | 5  | 1.497 | 0.619 | 0.619 |
| 5FU   | 0.022222 | 6  | 1.357 | 0.591 | 0.591 |
| 5FU   | 0.022222 | 7  | 1.37  | 0.596 | 0.596 |
| 5FU   | 0.022222 | 8  | 1.415 | 0.594 | 0.594 |
| 5FU   | 0.022222 | 9  | 1.343 | 0.594 | 0.594 |
| 5FU   | 0.022222 | 10 | 1.419 | 0.606 | 0.606 |
| 5FU   | 0.022222 | 11 | 1.364 | 0.602 | 0.602 |
| 5FU   | 0.022222 | 12 | 1.391 | 0.607 | 0.607 |
| 5FU   | 0.022222 | 13 | 1.312 | 0.585 | 0.585 |
| 5FU   | 0.022222 | 14 | 1.405 | 0.611 | 0.611 |
| 5FU   | 0.022222 | 15 | 1.332 | 0.591 | 0.591 |
| 5FU   | 0.022222 | 16 | 1.323 | 0.567 | 0.567 |
| 5FU   | 0.022222 | 17 | 1.441 | 0.601 | 0.601 |
| 5FU   | 0.022222 | 18 | 1.399 | 0.603 | 0.603 |
| 5FU   | 0.022222 | 19 | 1.419 | 0.602 | 0.602 |
| 5FU   | 0.022222 | 20 | 1.418 | 0.613 | 0.613 |
| 5FU   | 0.022222 | 21 | 1.334 | 0.583 | 0.583 |
| 5FU   | 0.022222 | 22 | 1.352 | 0.577 | 0.577 |
| 5FU   | 0.1      | 1  | 1.401 | 0.6   | 0.6   |
| 5FU   | 0.1      | 2  | 1.454 | 0.594 | 0.594 |
| 5FU   | 0.1      | 3  | 1.504 | 0.609 | 0.609 |
| 5FU   | 0.1      | 4  | 1.514 | 0.615 | 0.615 |
| 5FU   | 0.1      | 5  | 1.645 | 0.619 | 0.645 |
| 5FU   | 0.1      | 6  | 1.486 | 0.602 | 0.602 |
| 5FU   | 0.1      | 7  | 1.474 | 0.61  | 0.61  |
| 5FU   | 0.1      | 8  | 1.498 | 0.602 | 0.602 |
| 5FU   | 0.1      | 9  | 1.484 | 0.612 | 0.612 |
| 5FU   | 0.1      | 10 | 1.513 | 0.617 | 0.617 |
| 5FU   | 0.1      | 11 | 1.49  | 0.622 | 0.622 |
| 5FU   | 0.1      | 12 | 1.517 | 0.617 | 0.617 |
| 5FU   | 0.1      | 13 | 1.453 | 0.596 | 0.596 |
| 5FU   | 0.1      | 14 | 1.542 | 0.614 | 0.614 |
| 5FU   | 0.1      | 15 | 1.474 | 0.594 | 0.594 |
| 5FU   | 0.1      | 16 | 1.445 | 0.594 | 0.594 |
| 5FU   | 0.1      | 17 | 1.549 | 0.609 | 0.609 |
| 5FU   | 0.1      | 18 | 1.517 | 0.606 | 0.606 |
| 5FU   | 0.1      | 19 | 1.556 | 0.613 | 0.613 |
| 5FU   | 0.1      | 20 | 1.517 | 0.615 | 0.615 |
| 5FU   | 0.1      | 21 | 1.479 | 0.61  | 0.61  |
| 5FU   | 0.1      | 22 | 1.452 | 0.594 | 0.594 |
| Arsen | 0.02963  | 1  | 1.533 | 0.62  | 0.62  |
| Arsen | 0.02963  | 2  | 1.6   | 0.633 | 0.633 |
| Arsen | 0.02963  | 3  | 1.701 | 0.634 | 0.701 |
| Arsen | 0.02963  | 4  | 1.61  | 0.625 | 0.625 |
| Arsen | 0.02963  | 5  | 1.729 | 0.623 | 0.729 |
| Arsen | 0.02963  | 6  | 1.643 | 0.622 | 0.643 |
| Arsen | 0.02963  | 7  | 1.654 | 0.625 | 0.654 |
| Arsen | 0.02963  | 8  | 1.625 | 0.62  | 0.625 |

|       |         |    |       |       |       |
|-------|---------|----|-------|-------|-------|
| Arsen | 0.02963 | 9  | 1.61  | 0.621 | 0.621 |
| Arsen | 0.02963 | 10 | 1.692 | 0.631 | 0.692 |
| Arsen | 0.02963 | 11 | 1.591 | 0.623 | 0.623 |
| Arsen | 0.02963 | 12 | 1.688 | 0.638 | 0.688 |
| Arsen | 0.02963 | 13 | 1.579 | 0.621 | 0.621 |
| Arsen | 0.02963 | 14 | 1.696 | 0.631 | 0.696 |
| Arsen | 0.02963 | 15 | 1.588 | 0.618 | 0.618 |
| Arsen | 0.02963 | 16 | 1.543 | 0.608 | 0.608 |
| Arsen | 0.02963 | 17 | 1.685 | 0.602 | 0.685 |
| Arsen | 0.02963 | 18 | 1.651 | 0.623 | 0.651 |
| Arsen | 0.02963 | 19 | 1.669 | 0.617 | 0.669 |
| Arsen | 0.02963 | 20 | 1.692 | 0.638 | 0.692 |
| Arsen | 0.02963 | 21 | 1.639 | 0.635 | 0.639 |
| Arsen | 0.02963 | 22 | 1.606 | 0.628 | 0.628 |
| Arsen | 0.04444 | 1  | 1.373 | 0.597 | 0.597 |
| Arsen | 0.04444 | 2  | 1.417 | 0.608 | 0.608 |
| Arsen | 0.04444 | 3  | 1.486 | 0.613 | 0.613 |
| Arsen | 0.04444 | 4  | 1.438 | 0.603 | 0.603 |
| Arsen | 0.04444 | 5  | 1.551 | 0.624 | 0.624 |
| Arsen | 0.04444 | 6  | 1.446 | 0.603 | 0.603 |
| Arsen | 0.04444 | 7  | 1.46  | 0.618 | 0.618 |
| Arsen | 0.04444 | 8  | 1.466 | 0.613 | 0.613 |
| Arsen | 0.04444 | 9  | 1.425 | 0.612 | 0.612 |
| Arsen | 0.04444 | 10 | 1.523 | 0.628 | 0.628 |
| Arsen | 0.04444 | 11 | 1.44  | 0.615 | 0.615 |
| Arsen | 0.04444 | 12 | 1.468 | 0.613 | 0.613 |
| Arsen | 0.04444 | 13 | 1.431 | 0.609 | 0.609 |
| Arsen | 0.04444 | 14 | 1.486 | 0.608 | 0.608 |
| Arsen | 0.04444 | 15 | 1.425 | 0.608 | 0.608 |
| Arsen | 0.04444 | 16 | 1.388 | 0.586 | 0.586 |
| Arsen | 0.04444 | 17 | 1.533 | 0.598 | 0.598 |
| Arsen | 0.04444 | 18 | 1.482 | 0.613 | 0.613 |
| Arsen | 0.04444 | 19 | 1.502 | 0.604 | 0.604 |
| Arsen | 0.04444 | 20 | 1.504 | 0.612 | 0.612 |
| Arsen | 0.04444 | 21 | 1.42  | 0.616 | 0.616 |
| Arsen | 0.04444 | 22 | 1.348 | 0.593 | 0.593 |
| Arsen | 0.06667 | 1  | 1.333 | 0.588 | 0.588 |
| Arsen | 0.06667 | 2  | 1.404 | 0.611 | 0.611 |
| Arsen | 0.06667 | 3  | 1.464 | 0.624 | 0.624 |
| Arsen | 0.06667 | 4  | 1.442 | 0.603 | 0.603 |
| Arsen | 0.06667 | 5  | 1.548 | 0.626 | 0.626 |
| Arsen | 0.06667 | 6  | 1.422 | 0.613 | 0.613 |
| Arsen | 0.06667 | 7  | 1.425 | 0.613 | 0.613 |
| Arsen | 0.06667 | 8  | 1.448 | 0.617 | 0.617 |
| Arsen | 0.06667 | 9  | 1.375 | 0.606 | 0.606 |
| Arsen | 0.06667 | 10 | 1.482 | 0.627 | 0.627 |
| Arsen | 0.06667 | 11 | 1.43  | 0.615 | 0.615 |
| Arsen | 0.06667 | 12 | 1.426 | 0.62  | 0.62  |
| Arsen | 0.06667 | 13 | 1.386 | 0.613 | 0.613 |

|       |          |    |       |       |       |
|-------|----------|----|-------|-------|-------|
| Arsen | 0.06667  | 14 | 1.476 | 0.622 | 0.622 |
| Arsen | 0.06667  | 15 | 1.414 | 0.613 | 0.613 |
| Arsen | 0.06667  | 16 | 1.407 | 0.595 | 0.595 |
| Arsen | 0.06667  | 17 | 1.525 | 0.617 | 0.617 |
| Arsen | 0.06667  | 18 | 1.444 | 0.623 | 0.623 |
| Arsen | 0.06667  | 19 | 1.465 | 0.611 | 0.611 |
| Arsen | 0.06667  | 20 | 1.487 | 0.614 | 0.614 |
| Arsen | 0.06667  | 21 | 1.351 | 0.605 | 0.605 |
| Arsen | 0.06667  | 22 | 1.362 | 0.594 | 0.594 |
| Arsen | 0.1      | 1  | 1.401 | 0.613 | 0.613 |
| Arsen | 0.1      | 2  | 1.468 | 0.618 | 0.618 |
| Arsen | 0.1      | 3  | 1.521 | 0.627 | 0.627 |
| Arsen | 0.1      | 4  | 1.491 | 0.614 | 0.614 |
| Arsen | 0.1      | 5  | 1.628 | 0.613 | 0.628 |
| Arsen | 0.1      | 6  | 1.484 | 0.623 | 0.623 |
| Arsen | 0.1      | 7  | 1.489 | 0.612 | 0.612 |
| Arsen | 0.1      | 8  | 1.526 | 0.616 | 0.616 |
| Arsen | 0.1      | 9  | 1.47  | 0.612 | 0.612 |
| Arsen | 0.1      | 10 | 1.548 | 0.631 | 0.631 |
| Arsen | 0.1      | 11 | 1.484 | 0.62  | 0.62  |
| Arsen | 0.1      | 12 | 1.533 | 0.629 | 0.629 |
| Arsen | 0.1      | 13 | 1.444 | 0.623 | 0.623 |
| Arsen | 0.1      | 14 | 1.541 | 0.624 | 0.624 |
| Arsen | 0.1      | 15 | 1.449 | 0.606 | 0.606 |
| Arsen | 0.1      | 16 | 1.461 | 0.603 | 0.603 |
| Arsen | 0.1      | 17 | 1.613 | 0.618 | 0.618 |
| Arsen | 0.1      | 18 | 1.539 | 0.64  | 0.64  |
| Arsen | 0.1      | 19 | 1.541 | 0.632 | 0.632 |
| Arsen | 0.1      | 20 | 1.565 | 0.632 | 0.632 |
| Arsen | 0.1      | 21 | 1.458 | 0.619 | 0.619 |
| Arsen | 0.1      | 22 | 1.422 | 0.603 | 0.603 |
| Aza   | 0.004375 | 1  | 1.555 | 0.632 | 0.632 |
| Aza   | 0.004375 | 2  | 1.604 | 0.627 | 0.627 |
| Aza   | 0.004375 | 3  | 1.687 | 0.634 | 0.687 |
| Aza   | 0.004375 | 4  | 1.599 | 0.618 | 0.618 |
| Aza   | 0.004375 | 5  | 1.707 | 0.613 | 0.707 |
| Aza   | 0.004375 | 6  | 1.65  | 0.627 | 0.65  |
| Aza   | 0.004375 | 7  | 1.627 | 0.631 | 0.631 |
| Aza   | 0.004375 | 8  | 1.66  | 0.616 | 0.66  |
| Aza   | 0.004375 | 9  | 1.606 | 0.624 | 0.624 |
| Aza   | 0.004375 | 10 | 1.719 | 0.631 | 0.719 |
| Aza   | 0.004375 | 11 | 1.621 | 0.628 | 0.628 |
| Aza   | 0.004375 | 12 | 1.662 | 0.623 | 0.662 |
| Aza   | 0.004375 | 13 | 1.611 | 0.62  | 0.62  |
| Aza   | 0.004375 | 14 | 1.671 | 0.606 | 0.671 |
| Aza   | 0.004375 | 15 | 1.62  | 0.63  | 0.63  |
| Aza   | 0.004375 | 16 | 1.583 | 0.608 | 0.608 |
| Aza   | 0.004375 | 17 | 1.663 | 0.608 | 0.663 |
| Aza   | 0.004375 | 18 | 1.649 | 0.621 | 0.649 |

|     |          |    |       |       |       |
|-----|----------|----|-------|-------|-------|
| Aza | 0.004375 | 19 | 1.717 | 0.63  | 0.717 |
| Aza | 0.004375 | 20 | 1.675 | 0.624 | 0.675 |
| Aza | 0.004375 | 21 | 1.601 | 0.628 | 0.628 |
| Aza | 0.004375 | 22 | 1.557 | 0.613 | 0.613 |
| Aza | 0.0109   | 1  | 1.503 | 0.623 | 0.623 |
| Aza | 0.0109   | 2  | 1.57  | 0.626 | 0.626 |
| Aza | 0.0109   | 3  | 1.626 | 0.624 | 0.626 |
| Aza | 0.0109   | 4  | 1.563 | 0.619 | 0.619 |
| Aza | 0.0109   | 5  | 1.682 | 0.625 | 0.682 |
| Aza | 0.0109   | 6  | 1.598 | 0.632 | 0.632 |
| Aza | 0.0109   | 7  | 1.603 | 0.637 | 0.637 |
| Aza | 0.0109   | 8  | 1.602 | 0.623 | 0.623 |
| Aza | 0.0109   | 9  | 1.54  | 0.611 | 0.611 |
| Aza | 0.0109   | 10 | 1.632 | 0.632 | 0.632 |
| Aza | 0.0109   | 11 | 1.587 | 0.633 | 0.633 |
| Aza | 0.0109   | 12 | 1.592 | 0.628 | 0.628 |
| Aza | 0.0109   | 13 | 1.543 | 0.614 | 0.614 |
| Aza | 0.0109   | 14 | 1.613 | 0.614 | 0.614 |
| Aza | 0.0109   | 15 | 1.563 | 0.613 | 0.613 |
| Aza | 0.0109   | 16 | 1.527 | 0.602 | 0.602 |
| Aza | 0.0109   | 17 | 1.673 | 0.619 | 0.673 |
| Aza | 0.0109   | 18 | 1.628 | 0.621 | 0.628 |
| Aza | 0.0109   | 19 | 1.605 | 0.626 | 0.626 |
| Aza | 0.0109   | 20 | 1.611 | 0.631 | 0.631 |
| Aza | 0.0109   | 21 | 1.55  | 0.628 | 0.628 |
| Aza | 0.0109   | 22 | 1.491 | 0.603 | 0.603 |
| Aza | 0.0273   | 1  | 1.324 | 0.594 | 0.594 |
| Aza | 0.0273   | 2  | 1.395 | 0.599 | 0.599 |
| Aza | 0.0273   | 3  | 1.484 | 0.609 | 0.609 |
| Aza | 0.0273   | 4  | 1.408 | 0.599 | 0.599 |
| Aza | 0.0273   | 5  | 1.53  | 0.611 | 0.611 |
| Aza | 0.0273   | 6  | 1.403 | 0.599 | 0.599 |
| Aza | 0.0273   | 7  | 1.426 | 0.611 | 0.611 |
| Aza | 0.0273   | 8  | 1.45  | 0.608 | 0.608 |
| Aza | 0.0273   | 9  | 1.388 | 0.595 | 0.595 |
| Aza | 0.0273   | 10 | 1.439 | 0.61  | 0.61  |
| Aza | 0.0273   | 11 | 1.415 | 0.609 | 0.609 |
| Aza | 0.0273   | 12 | 1.433 | 0.61  | 0.61  |
| Aza | 0.0273   | 13 | 1.399 | 0.591 | 0.591 |
| Aza | 0.0273   | 14 | 1.455 | 0.596 | 0.596 |
| Aza | 0.0273   | 15 | 1.362 | 0.589 | 0.589 |
| Aza | 0.0273   | 16 | 1.35  | 0.573 | 0.573 |
| Aza | 0.0273   | 17 | 1.509 | 0.613 | 0.613 |
| Aza | 0.0273   | 18 | 1.445 | 0.602 | 0.602 |
| Aza | 0.0273   | 19 | 1.456 | 0.617 | 0.617 |
| Aza | 0.0273   | 20 | 1.447 | 0.623 | 0.623 |
| Aza | 0.0273   | 21 | 1.372 | 0.597 | 0.597 |
| Aza | 0.0273   | 22 | 1.319 | 0.592 | 0.592 |
| Aza | 0.0684   | 1  | 1.22  | 0.565 | 0.565 |

|      |         |    |       |       |       |
|------|---------|----|-------|-------|-------|
| Aza  | 0.0684  | 2  | 1.272 | 0.572 | 0.572 |
| Aza  | 0.0684  | 3  | 1.341 | 0.585 | 0.585 |
| Aza  | 0.0684  | 4  | 1.302 | 0.579 | 0.579 |
| Aza  | 0.0684  | 5  | 1.403 | 0.589 | 0.589 |
| Aza  | 0.0684  | 6  | 1.281 | 0.578 | 0.578 |
| Aza  | 0.0684  | 7  | 1.309 | 0.581 | 0.581 |
| Aza  | 0.0684  | 8  | 1.349 | 0.588 | 0.588 |
| Aza  | 0.0684  | 9  | 1.303 | 0.57  | 0.57  |
| Aza  | 0.0684  | 10 | 1.336 | 0.591 | 0.591 |
| Aza  | 0.0684  | 11 | 1.292 | 0.583 | 0.583 |
| Aza  | 0.0684  | 12 | 1.351 | 0.587 | 0.587 |
| Aza  | 0.0684  | 13 | 1.263 | 0.569 | 0.569 |
| Aza  | 0.0684  | 14 | 1.343 | 0.591 | 0.591 |
| Aza  | 0.0684  | 15 | 1.247 | 0.562 | 0.562 |
| Aza  | 0.0684  | 16 | 1.255 | 0.555 | 0.555 |
| Aza  | 0.0684  | 17 | 1.382 | 0.585 | 0.585 |
| Aza  | 0.0684  | 18 | 1.349 | 0.583 | 0.583 |
| Aza  | 0.0684  | 19 | 1.339 | 0.597 | 0.597 |
| Aza  | 0.0684  | 20 | 1.379 | 0.6   | 0.6   |
| Aza  | 0.0684  | 21 | 1.309 | 0.573 | 0.573 |
| Aza  | 0.0684  | 22 | 1.214 | 0.552 | 0.552 |
| Bleo | 0.00008 | 1  | 1.381 | 0.603 | 0.603 |
| Bleo | 0.00008 | 2  | 1.441 | 0.615 | 0.615 |
| Bleo | 0.00008 | 3  | 1.529 | 0.623 | 0.623 |
| Bleo | 0.00008 | 4  | 1.468 | 0.614 | 0.614 |
| Bleo | 0.00008 | 5  | 1.574 | 0.631 | 0.631 |
| Bleo | 0.00008 | 6  | 1.443 | 0.621 | 0.621 |
| Bleo | 0.00008 | 7  | 1.469 | 0.636 | 0.636 |
| Bleo | 0.00008 | 8  | 1.506 | 0.614 | 0.614 |
| Bleo | 0.00008 | 9  | 1.465 | 0.619 | 0.619 |
| Bleo | 0.00008 | 10 | 1.472 | 0.604 | 0.604 |
| Bleo | 0.00008 | 11 | 1.443 | 0.615 | 0.615 |
| Bleo | 0.00008 | 12 | 1.47  | 0.615 | 0.615 |
| Bleo | 0.00008 | 13 | 1.424 | 0.601 | 0.601 |
| Bleo | 0.00008 | 14 | 1.513 | 0.614 | 0.614 |
| Bleo | 0.00008 | 15 | 1.434 | 0.608 | 0.608 |
| Bleo | 0.00008 | 16 | 1.455 | 0.605 | 0.605 |
| Bleo | 0.00008 | 17 | 1.523 | 0.603 | 0.603 |
| Bleo | 0.00008 | 18 | 1.5   | 0.619 | 0.619 |
| Bleo | 0.00008 | 19 | 1.515 | 0.617 | 0.617 |
| Bleo | 0.00008 | 20 | 1.487 | 0.615 | 0.615 |
| Bleo | 0.00008 | 21 | 1.499 | 0.628 | 0.628 |
| Bleo | 0.00008 | 22 | 1.416 | 0.613 | 0.613 |
| Bleo | 0.0004  | 1  | 1.384 | 0.599 | 0.599 |
| Bleo | 0.0004  | 2  | 1.439 | 0.611 | 0.611 |
| Bleo | 0.0004  | 3  | 1.472 | 0.614 | 0.614 |
| Bleo | 0.0004  | 4  | 1.441 | 0.606 | 0.606 |
| Bleo | 0.0004  | 5  | 1.577 | 0.62  | 0.62  |
| Bleo | 0.0004  | 6  | 1.451 | 0.611 | 0.611 |

|      |        |    |       |       |       |
|------|--------|----|-------|-------|-------|
| Bleo | 0.0004 | 7  | 1.469 | 0.613 | 0.613 |
| Bleo | 0.0004 | 8  | 1.46  | 0.595 | 0.595 |
| Bleo | 0.0004 | 9  | 1.468 | 0.605 | 0.605 |
| Bleo | 0.0004 | 10 | 1.492 | 0.61  | 0.61  |
| Bleo | 0.0004 | 11 | 1.428 | 0.612 | 0.612 |
| Bleo | 0.0004 | 12 | 1.473 | 0.613 | 0.613 |
| Bleo | 0.0004 | 13 | 1.409 | 0.594 | 0.594 |
| Bleo | 0.0004 | 14 | 1.548 | 0.617 | 0.617 |
| Bleo | 0.0004 | 15 | 1.471 | 0.617 | 0.617 |
| Bleo | 0.0004 | 16 | 1.425 | 0.592 | 0.592 |
| Bleo | 0.0004 | 17 | 1.522 | 0.598 | 0.598 |
| Bleo | 0.0004 | 18 | 1.483 | 0.619 | 0.619 |
| Bleo | 0.0004 | 19 | 1.47  | 0.614 | 0.614 |
| Bleo | 0.0004 | 20 | 1.519 | 0.617 | 0.617 |
| Bleo | 0.0004 | 21 | 1.453 | 0.618 | 0.618 |
| Bleo | 0.0004 | 22 | 1.411 | 0.589 | 0.589 |
| Bleo | 0.002  | 1  | 1.433 | 0.612 | 0.612 |
| Bleo | 0.002  | 2  | 1.483 | 0.613 | 0.613 |
| Bleo | 0.002  | 3  | 1.537 | 0.616 | 0.616 |
| Bleo | 0.002  | 4  | 1.527 | 0.613 | 0.613 |
| Bleo | 0.002  | 5  | 1.616 | 0.625 | 0.625 |
| Bleo | 0.002  | 6  | 1.512 | 0.614 | 0.614 |
| Bleo | 0.002  | 7  | 1.511 | 0.61  | 0.61  |
| Bleo | 0.002  | 8  | 1.564 | 0.613 | 0.613 |
| Bleo | 0.002  | 9  | 1.53  | 0.614 | 0.614 |
| Bleo | 0.002  | 10 | 1.574 | 0.62  | 0.62  |
| Bleo | 0.002  | 11 | 1.513 | 0.617 | 0.617 |
| Bleo | 0.002  | 12 | 1.541 | 0.617 | 0.617 |
| Bleo | 0.002  | 13 | 1.498 | 0.616 | 0.616 |
| Bleo | 0.002  | 14 | 1.598 | 0.608 | 0.608 |
| Bleo | 0.002  | 15 | 1.492 | 0.615 | 0.615 |
| Bleo | 0.002  | 16 | 1.479 | 0.604 | 0.604 |
| Bleo | 0.002  | 17 | 1.568 | 0.602 | 0.602 |
| Bleo | 0.002  | 18 | 1.559 | 0.628 | 0.628 |
| Bleo | 0.002  | 19 | 1.569 | 0.619 | 0.619 |
| Bleo | 0.002  | 20 | 1.564 | 0.616 | 0.616 |
| Bleo | 0.002  | 21 | 1.509 | 0.617 | 0.617 |
| Bleo | 0.002  | 22 | 1.428 | 0.578 | 0.578 |
| Bleo | 0.01   | 1  | 1.41  | 0.612 | 0.612 |
| Bleo | 0.01   | 2  | 1.494 | 0.618 | 0.618 |
| Bleo | 0.01   | 3  | 1.71  | 0.621 | 0.71  |
| Bleo | 0.01   | 4  | 1.489 | 0.605 | 0.605 |
| Bleo | 0.01   | 5  | 1.625 | 0.62  | 0.625 |
| Bleo | 0.01   | 6  | 1.621 | 0.622 | 0.622 |
| Bleo | 0.01   | 7  | 1.64  | 0.628 | 0.64  |
| Bleo | 0.01   | 8  | 1.551 | 0.607 | 0.607 |
| Bleo | 0.01   | 9  | 1.654 | 0.616 | 0.654 |
| Bleo | 0.01   | 10 | 1.549 | 0.611 | 0.611 |
| Bleo | 0.01   | 11 | 1.66  | 0.625 | 0.66  |

|        |        |    |       |       |       |
|--------|--------|----|-------|-------|-------|
| Bleo   | 0.01   | 12 | 1.581 | 0.615 | 0.615 |
| Bleo   | 0.01   | 13 | 1.609 | 0.619 | 0.619 |
| Bleo   | 0.01   | 14 | 1.588 | 0.594 | 0.594 |
| Bleo   | 0.01   | 15 | 1.609 | 0.635 | 0.635 |
| Bleo   | 0.01   | 16 | 1.452 | 0.596 | 0.596 |
| Bleo   | 0.01   | 17 | 1.56  | 0.599 | 0.599 |
| Bleo   | 0.01   | 18 | 1.688 | 0.633 | 0.688 |
| Bleo   | 0.01   | 19 | 1.715 | 0.629 | 0.715 |
| Bleo   | 0.01   | 20 | 1.677 | 0.618 | 0.677 |
| Bleo   | 0.01   | 21 | 1.595 | 0.633 | 0.633 |
| Bleo   | 0.01   | 22 | 1.591 | 0.597 | 0.597 |
| Busulf | 0.0125 | 1  | 1.295 | 0.58  | 0.58  |
| Busulf | 0.0125 | 2  | 1.333 | 0.588 | 0.588 |
| Busulf | 0.0125 | 3  | 1.398 | 0.596 | 0.596 |
| Busulf | 0.0125 | 4  | 1.38  | 0.595 | 0.595 |
| Busulf | 0.0125 | 5  | 1.477 | 0.611 | 0.611 |
| Busulf | 0.0125 | 6  | 1.393 | 0.603 | 0.603 |
| Busulf | 0.0125 | 7  | 1.351 | 0.6   | 0.6   |
| Busulf | 0.0125 | 8  | 1.391 | 0.593 | 0.593 |
| Busulf | 0.0125 | 9  | 1.329 | 0.589 | 0.589 |
| Busulf | 0.0125 | 10 | 1.458 | 0.617 | 0.617 |
| Busulf | 0.0125 | 11 | 1.383 | 0.597 | 0.597 |
| Busulf | 0.0125 | 12 | 1.38  | 0.599 | 0.599 |
| Busulf | 0.0125 | 13 | 1.332 | 0.588 | 0.588 |
| Busulf | 0.0125 | 14 | 1.42  | 0.598 | 0.598 |
| Busulf | 0.0125 | 15 | 1.353 | 0.611 | 0.611 |
| Busulf | 0.0125 | 16 | 1.33  | 0.567 | 0.567 |
| Busulf | 0.0125 | 17 | 1.471 | 0.609 | 0.609 |
| Busulf | 0.0125 | 18 | 1.385 | 0.598 | 0.598 |
| Busulf | 0.0125 | 19 | 1.43  | 0.606 | 0.606 |
| Busulf | 0.0125 | 20 | 1.462 | 0.614 | 0.614 |
| Busulf | 0.0125 | 21 | 1.35  | 0.599 | 0.599 |
| Busulf | 0.0125 | 22 | 1.27  | 0.582 | 0.582 |
| Busulf | 0.025  | 1  | 1.279 | 0.569 | 0.569 |
| Busulf | 0.025  | 2  | 1.568 | 0.617 | 0.617 |
| Busulf | 0.025  | 3  | 1.627 | 0.623 | 0.627 |
| Busulf | 0.025  | 4  | 1.357 | 0.568 | 0.568 |
| Busulf | 0.025  | 5  | 1.709 | 0.613 | 0.709 |
| Busulf | 0.025  | 6  | 1.594 | 0.616 | 0.616 |
| Busulf | 0.025  | 7  | 1.598 | 0.627 | 0.627 |
| Busulf | 0.025  | 8  | 1.598 | 0.618 | 0.618 |
| Busulf | 0.025  | 9  | 1.571 | 0.62  | 0.62  |
| Busulf | 0.025  | 10 | 1.38  | 0.599 | 0.599 |
| Busulf | 0.025  | 11 | 1.559 | 0.614 | 0.614 |
| Busulf | 0.025  | 12 | 1.498 | 0.598 | 0.598 |
| Busulf | 0.025  | 13 | 1.594 | 0.614 | 0.614 |
| Busulf | 0.025  | 14 | 1.476 | 0.608 | 0.608 |
| Busulf | 0.025  | 15 | 1.569 | 0.632 | 0.632 |
| Busulf | 0.025  | 16 | 1.294 | 0.559 | 0.559 |



|        |       |    |       |       |       |
|--------|-------|----|-------|-------|-------|
| Busulf | 0.025 | 17 | 1.422 | 0.591 | 0.591 |
| Busulf | 0.025 | 18 | 1.617 | 0.615 | 0.617 |
| Busulf | 0.025 | 19 | 1.601 | 0.604 | 0.604 |
| Busulf | 0.025 | 20 | 1.646 | 0.619 | 0.646 |
| Busulf | 0.025 | 21 | 1.523 | 0.616 | 0.616 |
| Busulf | 0.025 | 22 | 1.519 | 0.595 | 0.595 |
| Busulf | 0.05  | 1  | 1.534 | 0.622 | 0.622 |
| Busulf | 0.05  | 2  | 1.606 | 0.626 | 0.626 |
| Busulf | 0.05  | 3  | 1.677 | 0.622 | 0.677 |
| Busulf | 0.05  | 4  | 1.628 | 0.624 | 0.628 |
| Busulf | 0.05  | 5  | 1.725 | 0.612 | 0.725 |
| Busulf | 0.05  | 6  | 1.615 | 0.63  | 0.63  |
| Busulf | 0.05  | 7  | 1.651 | 0.636 | 0.651 |
| Busulf | 0.05  | 8  | 1.631 | 0.611 | 0.631 |
| Busulf | 0.05  | 9  | 1.631 | 0.631 | 0.631 |
| Busulf | 0.05  | 10 | 1.682 | 0.627 | 0.682 |
| Busulf | 0.05  | 11 | 1.621 | 0.621 | 0.621 |
| Busulf | 0.05  | 12 | 1.664 | 0.637 | 0.664 |
| Busulf | 0.05  | 13 | 1.583 | 0.604 | 0.604 |
| Busulf | 0.05  | 14 | 1.673 | 0.626 | 0.673 |
| Busulf | 0.05  | 15 | 1.627 | 0.645 | 0.645 |
| Busulf | 0.05  | 16 | 1.547 | 0.618 | 0.618 |
| Busulf | 0.05  | 17 | 1.623 | 0.593 | 0.623 |
| Busulf | 0.05  | 18 | 1.655 | 0.616 | 0.655 |
| Busulf | 0.05  | 19 | 1.669 | 0.621 | 0.669 |
| Busulf | 0.05  | 20 | 1.689 | 0.635 | 0.689 |
| Busulf | 0.05  | 21 | 1.603 | 0.62  | 0.62  |
| Busulf | 0.05  | 22 | 1.573 | 0.618 | 0.618 |
| Busulf | 0.1   | 1  | 1.564 | 0.625 | 0.625 |
| Busulf | 0.1   | 2  | 1.65  | 0.625 | 0.65  |
| Busulf | 0.1   | 3  | 1.702 | 0.627 | 0.702 |
| Busulf | 0.1   | 4  | 1.652 | 0.615 | 0.652 |
| Busulf | 0.1   | 5  | 1.745 | 0.612 | 0.745 |
| Busulf | 0.1   | 6  | 1.637 | 0.624 | 0.637 |
| Busulf | 0.1   | 7  | 1.657 | 0.624 | 0.657 |
| Busulf | 0.1   | 8  | 1.699 | 0.625 | 0.699 |
| Busulf | 0.1   | 9  | 1.61  | 0.622 | 0.622 |
| Busulf | 0.1   | 10 | 1.732 | 0.621 | 0.732 |
| Busulf | 0.1   | 11 | 1.628 | 0.62  | 0.628 |
| Busulf | 0.1   | 12 | 1.665 | 0.61  | 0.665 |
| Busulf | 0.1   | 13 | 1.633 | 0.609 | 0.633 |
| Busulf | 0.1   | 14 | 1.699 | 0.62  | 0.699 |
| Busulf | 0.1   | 15 | 1.609 | 0.624 | 0.624 |
| Busulf | 0.1   | 16 | 1.57  | 0.609 | 0.609 |
| Busulf | 0.1   | 17 | 1.69  | 0.596 | 0.69  |
| Busulf | 0.1   | 18 | 1.64  | 0.605 | 0.64  |
| Busulf | 0.1   | 19 | 1.758 | 0.613 | 0.758 |
| Busulf | 0.1   | 20 | 1.692 | 0.614 | 0.692 |
| Busulf | 0.1   | 21 | 1.63  | 0.629 | 0.63  |

|        |         |    |       |       |       |
|--------|---------|----|-------|-------|-------|
| Busulf | 0.1     | 22 | 1.593 | 0.609 | 0.609 |
| Carbo  | 0.00128 | 1  | 0.944 | 0.458 | 0.458 |
| Carbo  | 0.00128 | 2  | 1.001 | 0.479 | 0.479 |
| Carbo  | 0.00128 | 3  | 1.056 | 0.505 | 0.505 |
| Carbo  | 0.00128 | 4  | 1.022 | 0.496 | 0.496 |
| Carbo  | 0.00128 | 5  | 1.124 | 0.536 | 0.536 |
| Carbo  | 0.00128 | 6  | 1.03  | 0.502 | 0.502 |
| Carbo  | 0.00128 | 7  | 1.015 | 0.493 | 0.493 |
| Carbo  | 0.00128 | 8  | 1.058 | 0.505 | 0.505 |
| Carbo  | 0.00128 | 9  | 0.999 | 0.485 | 0.485 |
| Carbo  | 0.00128 | 10 | 1.06  | 0.508 | 0.508 |
| Carbo  | 0.00128 | 11 | 1.015 | 0.495 | 0.495 |
| Carbo  | 0.00128 | 12 | 1.028 | 0.503 | 0.503 |
| Carbo  | 0.00128 | 13 | 0.995 | 0.484 | 0.484 |
| Carbo  | 0.00128 | 14 | 1.056 | 0.504 | 0.504 |
| Carbo  | 0.00128 | 15 | 0.983 | 0.482 | 0.482 |
| Carbo  | 0.00128 | 16 | 0.99  | 0.469 | 0.469 |
| Carbo  | 0.00128 | 17 | 1.102 | 0.517 | 0.517 |
| Carbo  | 0.00128 | 18 | 1.057 | 0.507 | 0.507 |
| Carbo  | 0.00128 | 19 | 1.058 | 0.51  | 0.51  |
| Carbo  | 0.00128 | 20 | 1.069 | 0.516 | 0.516 |
| Carbo  | 0.00128 | 21 | 1.008 | 0.494 | 0.494 |
| Carbo  | 0.00128 | 22 | 0.951 | 0.47  | 0.47  |
| Carbo  | 0.0032  | 1  | 1.476 | 0.609 | 0.609 |
| Carbo  | 0.0032  | 2  | 1.549 | 0.611 | 0.611 |
| Carbo  | 0.0032  | 3  | 1.647 | 0.616 | 0.647 |
| Carbo  | 0.0032  | 4  | 1.553 | 0.618 | 0.618 |
| Carbo  | 0.0032  | 5  | 1.702 | 0.628 | 0.702 |
| Carbo  | 0.0032  | 6  | 1.591 | 0.614 | 0.614 |
| Carbo  | 0.0032  | 7  | 1.606 | 0.626 | 0.626 |
| Carbo  | 0.0032  | 8  | 1.581 | 0.612 | 0.612 |
| Carbo  | 0.0032  | 9  | 1.559 | 0.61  | 0.61  |
| Carbo  | 0.0032  | 10 | 1.643 | 0.623 | 0.643 |
| Carbo  | 0.0032  | 11 | 1.576 | 0.62  | 0.62  |
| Carbo  | 0.0032  | 12 | 1.593 | 0.62  | 0.62  |
| Carbo  | 0.0032  | 13 | 1.594 | 0.619 | 0.619 |
| Carbo  | 0.0032  | 14 | 1.631 | 0.609 | 0.631 |
| Carbo  | 0.0032  | 15 | 1.552 | 0.607 | 0.607 |
| Carbo  | 0.0032  | 16 | 1.549 | 0.603 | 0.603 |
| Carbo  | 0.0032  | 17 | 1.637 | 0.608 | 0.637 |
| Carbo  | 0.0032  | 18 | 1.629 | 0.614 | 0.629 |
| Carbo  | 0.0032  | 19 | 1.638 | 0.621 | 0.638 |
| Carbo  | 0.0032  | 20 | 1.661 | 0.621 | 0.661 |
| Carbo  | 0.0032  | 21 | 1.668 | 0.642 | 0.668 |
| Carbo  | 0.0032  | 22 | 1.505 | 0.607 | 0.607 |
| Carbo  | 0.008   | 1  | 1.233 | 0.566 | 0.566 |
| Carbo  | 0.008   | 2  | 1.284 | 0.577 | 0.577 |
| Carbo  | 0.008   | 3  | 1.337 | 0.587 | 0.587 |
| Carbo  | 0.008   | 4  | 1.317 | 0.578 | 0.578 |

|       |         |    |       |       |       |
|-------|---------|----|-------|-------|-------|
| Carbo | 0.008   | 5  | 1.425 | 0.607 | 0.607 |
| Carbo | 0.008   | 6  | 1.31  | 0.58  | 0.58  |
| Carbo | 0.008   | 7  | 1.315 | 0.589 | 0.589 |
| Carbo | 0.008   | 8  | 1.346 | 0.583 | 0.583 |
| Carbo | 0.008   | 9  | 1.28  | 0.572 | 0.572 |
| Carbo | 0.008   | 10 | 1.349 | 0.591 | 0.591 |
| Carbo | 0.008   | 11 | 1.306 | 0.589 | 0.589 |
| Carbo | 0.008   | 12 | 1.329 | 0.597 | 0.597 |
| Carbo | 0.008   | 13 | 1.296 | 0.566 | 0.566 |
| Carbo | 0.008   | 14 | 1.377 | 0.595 | 0.595 |
| Carbo | 0.008   | 15 | 1.286 | 0.587 | 0.587 |
| Carbo | 0.008   | 16 | 1.263 | 0.562 | 0.562 |
| Carbo | 0.008   | 17 | 1.398 | 0.59  | 0.59  |
| Carbo | 0.008   | 18 | 1.34  | 0.595 | 0.595 |
| Carbo | 0.008   | 19 | 1.348 | 0.595 | 0.595 |
| Carbo | 0.008   | 20 | 1.352 | 0.588 | 0.588 |
| Carbo | 0.008   | 21 | 1.298 | 0.584 | 0.584 |
| Carbo | 0.008   | 22 | 1.263 | 0.565 | 0.565 |
| Carbo | 0.02    | 1  | 1.384 | 0.597 | 0.597 |
| Carbo | 0.02    | 2  | 1.425 | 0.606 | 0.606 |
| Carbo | 0.02    | 3  | 1.501 | 0.618 | 0.618 |
| Carbo | 0.02    | 4  | 1.463 | 0.612 | 0.612 |
| Carbo | 0.02    | 5  | 1.594 | 0.617 | 0.617 |
| Carbo | 0.02    | 6  | 1.464 | 0.609 | 0.609 |
| Carbo | 0.02    | 7  | 1.462 | 0.618 | 0.618 |
| Carbo | 0.02    | 8  | 1.484 | 0.61  | 0.61  |
| Carbo | 0.02    | 9  | 1.431 | 0.603 | 0.603 |
| Carbo | 0.02    | 10 | 1.499 | 0.623 | 0.623 |
| Carbo | 0.02    | 11 | 1.467 | 0.624 | 0.624 |
| Carbo | 0.02    | 12 | 1.546 | 0.623 | 0.623 |
| Carbo | 0.02    | 13 | 1.45  | 0.603 | 0.603 |
| Carbo | 0.02    | 14 | 1.524 | 0.611 | 0.611 |
| Carbo | 0.02    | 15 | 1.447 | 0.613 | 0.613 |
| Carbo | 0.02    | 16 | 1.442 | 0.601 | 0.601 |
| Carbo | 0.02    | 17 | 1.545 | 0.598 | 0.598 |
| Carbo | 0.02    | 18 | 1.506 | 0.613 | 0.613 |
| Carbo | 0.02    | 19 | 1.501 | 0.612 | 0.612 |
| Carbo | 0.02    | 20 | 1.507 | 0.616 | 0.616 |
| Carbo | 0.02    | 21 | 1.41  | 0.616 | 0.616 |
| Carbo | 0.02    | 22 | 1.391 | 0.609 | 0.609 |
| Clad  | 0.00064 | 1  | 1.037 | 0.494 | 0.494 |
| Clad  | 0.00064 | 2  | 1.069 | 0.512 | 0.512 |
| Clad  | 0.00064 | 3  | 1.141 | 0.542 | 0.542 |
| Clad  | 0.00064 | 4  | 1.103 | 0.522 | 0.522 |
| Clad  | 0.00064 | 5  | 1.201 | 0.557 | 0.557 |
| Clad  | 0.00064 | 6  | 1.106 | 0.521 | 0.521 |
| Clad  | 0.00064 | 7  | 1.1   | 0.519 | 0.519 |
| Clad  | 0.00064 | 8  | 1.12  | 0.527 | 0.527 |
| Clad  | 0.00064 | 9  | 1.08  | 0.519 | 0.519 |

|      |         |    |       |       |       |
|------|---------|----|-------|-------|-------|
| Clad | 0.00064 | 10 | 1.163 | 0.541 | 0.541 |
| Clad | 0.00064 | 11 | 1.077 | 0.52  | 0.52  |
| Clad | 0.00064 | 12 | 1.116 | 0.535 | 0.535 |
| Clad | 0.00064 | 13 | 1.085 | 0.513 | 0.513 |
| Clad | 0.00064 | 14 | 1.162 | 0.541 | 0.541 |
| Clad | 0.00064 | 15 | 1.062 | 0.496 | 0.496 |
| Clad | 0.00064 | 16 | 1.054 | 0.499 | 0.499 |
| Clad | 0.00064 | 17 | 1.178 | 0.54  | 0.54  |
| Clad | 0.00064 | 18 | 1.121 | 0.537 | 0.537 |
| Clad | 0.00064 | 19 | 1.129 | 0.537 | 0.537 |
| Clad | 0.00064 | 20 | 1.145 | 0.539 | 0.539 |
| Clad | 0.00064 | 21 | 1.099 | 0.527 | 0.527 |
| Clad | 0.00064 | 22 | 1.064 | 0.495 | 0.495 |
| Clad | 0.0016  | 1  | 1.233 | 0.564 | 0.564 |
| Clad | 0.0016  | 2  | 1.3   | 0.577 | 0.577 |
| Clad | 0.0016  | 3  | 1.372 | 0.605 | 0.605 |
| Clad | 0.0016  | 4  | 1.318 | 0.588 | 0.588 |
| Clad | 0.0016  | 5  | 1.457 | 0.61  | 0.61  |
| Clad | 0.0016  | 6  | 1.309 | 0.59  | 0.59  |
| Clad | 0.0016  | 7  | 1.342 | 0.597 | 0.597 |
| Clad | 0.0016  | 8  | 1.363 | 0.585 | 0.585 |
| Clad | 0.0016  | 9  | 1.289 | 0.582 | 0.582 |
| Clad | 0.0016  | 10 | 1.401 | 0.608 | 0.608 |
| Clad | 0.0016  | 11 | 1.333 | 0.587 | 0.587 |
| Clad | 0.0016  | 12 | 1.36  | 0.606 | 0.606 |
| Clad | 0.0016  | 13 | 1.306 | 0.579 | 0.579 |
| Clad | 0.0016  | 14 | 1.4   | 0.601 | 0.601 |
| Clad | 0.0016  | 15 | 1.312 | 0.574 | 0.574 |
| Clad | 0.0016  | 16 | 1.301 | 0.57  | 0.57  |
| Clad | 0.0016  | 17 | 1.416 | 0.597 | 0.597 |
| Clad | 0.0016  | 18 | 1.336 | 0.594 | 0.594 |
| Clad | 0.0016  | 19 | 1.362 | 0.591 | 0.591 |
| Clad | 0.0016  | 20 | 1.368 | 0.597 | 0.597 |
| Clad | 0.0016  | 21 | 1.277 | 0.595 | 0.595 |
| Clad | 0.0016  | 22 | 1.27  | 0.567 | 0.567 |
| Clad | 0.004   | 1  | 1.426 | 0.602 | 0.602 |
| Clad | 0.004   | 2  | 1.498 | 0.609 | 0.609 |
| Clad | 0.004   | 3  | 1.547 | 0.613 | 0.613 |
| Clad | 0.004   | 4  | 1.446 | 0.61  | 0.61  |
| Clad | 0.004   | 5  | 1.559 | 0.621 | 0.621 |
| Clad | 0.004   | 6  | 1.485 | 0.618 | 0.618 |
| Clad | 0.004   | 7  | 1.492 | 0.615 | 0.615 |
| Clad | 0.004   | 8  | 1.542 | 0.604 | 0.604 |
| Clad | 0.004   | 9  | 1.505 | 0.608 | 0.608 |
| Clad | 0.004   | 10 | 1.541 | 0.618 | 0.618 |
| Clad | 0.004   | 11 | 1.498 | 0.614 | 0.614 |
| Clad | 0.004   | 12 | 1.544 | 0.623 | 0.623 |
| Clad | 0.004   | 13 | 1.494 | 0.607 | 0.607 |
| Clad | 0.004   | 14 | 1.479 | 0.612 | 0.612 |

|       |           |    |       |       |       |
|-------|-----------|----|-------|-------|-------|
| Clad  | 0.004     | 15 | 1.482 | 0.599 | 0.599 |
| Clad  | 0.004     | 16 | 1.494 | 0.605 | 0.605 |
| Clad  | 0.004     | 17 | 1.553 | 0.601 | 0.601 |
| Clad  | 0.004     | 18 | 1.524 | 0.61  | 0.61  |
| Clad  | 0.004     | 19 | 1.552 | 0.611 | 0.611 |
| Clad  | 0.004     | 20 | 1.551 | 0.623 | 0.623 |
| Clad  | 0.004     | 21 | 1.511 | 0.611 | 0.611 |
| Clad  | 0.004     | 22 | 1.442 | 0.596 | 0.596 |
| Clad  | 0.01      | 1  | 1.487 | 0.611 | 0.611 |
| Clad  | 0.01      | 2  | 1.558 | 0.61  | 0.61  |
| Clad  | 0.01      | 3  | 1.623 | 0.62  | 0.623 |
| Clad  | 0.01      | 4  | 1.437 | 0.608 | 0.608 |
| Clad  | 0.01      | 5  | 1.563 | 0.616 | 0.616 |
| Clad  | 0.01      | 6  | 1.568 | 0.62  | 0.62  |
| Clad  | 0.01      | 7  | 1.573 | 0.612 | 0.612 |
| Clad  | 0.01      | 8  | 1.6   | 0.615 | 0.615 |
| Clad  | 0.01      | 9  | 1.586 | 0.617 | 0.617 |
| Clad  | 0.01      | 10 | 1.597 | 0.62  | 0.62  |
| Clad  | 0.01      | 11 | 1.591 | 0.614 | 0.614 |
| Clad  | 0.01      | 12 | 1.602 | 0.617 | 0.617 |
| Clad  | 0.01      | 13 | 1.599 | 0.617 | 0.617 |
| Clad  | 0.01      | 14 | 1.501 | 0.6   | 0.6   |
| Clad  | 0.01      | 15 | 1.603 | 0.602 | 0.603 |
| Clad  | 0.01      | 16 | 1.567 | 0.606 | 0.606 |
| Clad  | 0.01      | 17 | 1.531 | 0.59  | 0.59  |
| Clad  | 0.01      | 18 | 1.594 | 0.608 | 0.608 |
| Clad  | 0.01      | 19 | 1.6   | 0.618 | 0.618 |
| Clad  | 0.01      | 20 | 1.649 | 0.617 | 0.649 |
| Clad  | 0.01      | 21 | 1.565 | 0.619 | 0.619 |
| Clad  | 0.01      | 22 | 1.469 | 0.606 | 0.606 |
| Cytar | 0.0001166 | 1  | 1.369 | 0.597 | 0.597 |
| Cytar | 0.0001166 | 2  | 1.42  | 0.601 | 0.601 |
| Cytar | 0.0001166 | 3  | 1.586 | 0.631 | 0.631 |
| Cytar | 0.0001166 | 4  | 1.448 | 0.61  | 0.61  |
| Cytar | 0.0001166 | 5  | 1.582 | 0.616 | 0.616 |
| Cytar | 0.0001166 | 6  | 1.527 | 0.617 | 0.617 |
| Cytar | 0.0001166 | 7  | 1.545 | 0.62  | 0.62  |
| Cytar | 0.0001166 | 8  | 1.503 | 0.615 | 0.615 |
| Cytar | 0.0001166 | 9  | 1.546 | 0.631 | 0.631 |
| Cytar | 0.0001166 | 10 | 1.613 | 0.629 | 0.629 |
| Cytar | 0.0001166 | 11 | 1.543 | 0.62  | 0.62  |
| Cytar | 0.0001166 | 12 | 1.561 | 0.619 | 0.619 |
| Cytar | 0.0001166 | 13 | 1.524 | 0.609 | 0.609 |
| Cytar | 0.0001166 | 14 | 1.613 | 0.618 | 0.618 |
| Cytar | 0.0001166 | 15 | 1.516 | 0.612 | 0.612 |
| Cytar | 0.0001166 | 16 | 1.484 | 0.597 | 0.597 |
| Cytar | 0.0001166 | 17 | 1.539 | 0.61  | 0.61  |
| Cytar | 0.0001166 | 18 | 1.571 | 0.616 | 0.616 |
| Cytar | 0.0001166 | 19 | 1.612 | 0.63  | 0.63  |

|       |           |    |       |       |       |
|-------|-----------|----|-------|-------|-------|
| Cytar | 0.0001166 | 20 | 1.601 | 0.62  | 0.62  |
| Cytar | 0.0001166 | 21 | 1.513 | 0.616 | 0.616 |
| Cytar | 0.0001166 | 22 | 1.532 | 0.616 | 0.616 |
| Cytar | 0.0004082 | 1  | 1.475 | 0.62  | 0.62  |
| Cytar | 0.0004082 | 2  | 1.518 | 0.61  | 0.61  |
| Cytar | 0.0004082 | 3  | 1.605 | 0.627 | 0.627 |
| Cytar | 0.0004082 | 4  | 1.526 | 0.617 | 0.617 |
| Cytar | 0.0004082 | 5  | 1.658 | 0.619 | 0.658 |
| Cytar | 0.0004082 | 6  | 1.569 | 0.616 | 0.616 |
| Cytar | 0.0004082 | 7  | 1.546 | 0.62  | 0.62  |
| Cytar | 0.0004082 | 8  | 1.58  | 0.614 | 0.614 |
| Cytar | 0.0004082 | 9  | 1.537 | 0.623 | 0.623 |
| Cytar | 0.0004082 | 10 | 1.588 | 0.619 | 0.619 |
| Cytar | 0.0004082 | 11 | 1.55  | 0.619 | 0.619 |
| Cytar | 0.0004082 | 12 | 1.601 | 0.621 | 0.621 |
| Cytar | 0.0004082 | 13 | 1.525 | 0.615 | 0.615 |
| Cytar | 0.0004082 | 14 | 1.623 | 0.624 | 0.624 |
| Cytar | 0.0004082 | 15 | 1.552 | 0.619 | 0.619 |
| Cytar | 0.0004082 | 16 | 1.487 | 0.605 | 0.605 |
| Cytar | 0.0004082 | 17 | 1.603 | 0.61  | 0.61  |
| Cytar | 0.0004082 | 18 | 1.562 | 0.619 | 0.619 |
| Cytar | 0.0004082 | 19 | 1.607 | 0.623 | 0.623 |
| Cytar | 0.0004082 | 20 | 1.608 | 0.623 | 0.623 |
| Cytar | 0.0004082 | 21 | 1.551 | 0.618 | 0.618 |
| Cytar | 0.0004082 | 22 | 1.46  | 0.612 | 0.612 |
| Cytar | 0.0014286 | 1  | 1.39  | 0.599 | 0.599 |
| Cytar | 0.0014286 | 2  | 1.44  | 0.599 | 0.599 |
| Cytar | 0.0014286 | 3  | 1.557 | 0.616 | 0.616 |
| Cytar | 0.0014286 | 4  | 1.478 | 0.612 | 0.612 |
| Cytar | 0.0014286 | 5  | 1.591 | 0.616 | 0.616 |
| Cytar | 0.0014286 | 6  | 1.462 | 0.611 | 0.611 |
| Cytar | 0.0014286 | 7  | 1.469 | 0.612 | 0.612 |
| Cytar | 0.0014286 | 8  | 1.501 | 0.611 | 0.611 |
| Cytar | 0.0014286 | 9  | 1.463 | 0.607 | 0.607 |
| Cytar | 0.0014286 | 10 | 1.517 | 0.61  | 0.61  |
| Cytar | 0.0014286 | 11 | 1.467 | 0.611 | 0.611 |
| Cytar | 0.0014286 | 12 | 1.502 | 0.621 | 0.621 |
| Cytar | 0.0014286 | 13 | 1.428 | 0.603 | 0.603 |
| Cytar | 0.0014286 | 14 | 1.539 | 0.614 | 0.614 |
| Cytar | 0.0014286 | 15 | 1.475 | 0.595 | 0.595 |
| Cytar | 0.0014286 | 16 | 1.424 | 0.59  | 0.59  |
| Cytar | 0.0014286 | 17 | 1.572 | 0.603 | 0.603 |
| Cytar | 0.0014286 | 18 | 1.482 | 0.617 | 0.617 |
| Cytar | 0.0014286 | 19 | 1.514 | 0.619 | 0.619 |
| Cytar | 0.0014286 | 20 | 1.506 | 0.617 | 0.617 |
| Cytar | 0.0014286 | 21 | 1.45  | 0.609 | 0.609 |
| Cytar | 0.0014286 | 22 | 1.412 | 0.592 | 0.592 |
| Cytar | 0.005     | 1  | 1.192 | 0.551 | 0.551 |
| Cytar | 0.005     | 2  | 1.238 | 0.557 | 0.557 |

|       |           |    |       |       |       |
|-------|-----------|----|-------|-------|-------|
| Cytar | 0.005     | 3  | 1.329 | 0.585 | 0.585 |
| Cytar | 0.005     | 4  | 1.296 | 0.574 | 0.574 |
| Cytar | 0.005     | 5  | 1.377 | 0.596 | 0.596 |
| Cytar | 0.005     | 6  | 1.265 | 0.571 | 0.571 |
| Cytar | 0.005     | 7  | 1.247 | 0.575 | 0.575 |
| Cytar | 0.005     | 8  | 1.299 | 0.575 | 0.575 |
| Cytar | 0.005     | 9  | 1.266 | 0.562 | 0.562 |
| Cytar | 0.005     | 10 | 1.307 | 0.587 | 0.587 |
| Cytar | 0.005     | 11 | 1.26  | 0.575 | 0.575 |
| Cytar | 0.005     | 12 | 1.291 | 0.583 | 0.583 |
| Cytar | 0.005     | 13 | 1.227 | 0.57  | 0.57  |
| Cytar | 0.005     | 14 | 1.329 | 0.582 | 0.582 |
| Cytar | 0.005     | 15 | 1.255 | 0.558 | 0.558 |
| Cytar | 0.005     | 16 | 1.237 | 0.543 | 0.543 |
| Cytar | 0.005     | 17 | 1.348 | 0.582 | 0.582 |
| Cytar | 0.005     | 18 | 1.275 | 0.585 | 0.585 |
| Cytar | 0.005     | 19 | 1.318 | 0.596 | 0.596 |
| Cytar | 0.005     | 20 | 1.312 | 0.591 | 0.591 |
| Cytar | 0.005     | 21 | 1.267 | 0.569 | 0.569 |
| Cytar | 0.005     | 22 | 1.209 | 0.54  | 0.54  |
| Daun  | 0.0000125 | 1  | 1.097 | 0.52  | 0.52  |
| Daun  | 0.0000125 | 2  | 1.548 | 0.624 | 0.624 |
| Daun  | 0.0000125 | 3  | 1.646 | 0.637 | 0.646 |
| Daun  | 0.0000125 | 4  | 1.198 | 0.546 | 0.546 |
| Daun  | 0.0000125 | 5  | 1.65  | 0.617 | 0.65  |
| Daun  | 0.0000125 | 6  | 1.564 | 0.629 | 0.629 |
| Daun  | 0.0000125 | 7  | 1.586 | 0.64  | 0.64  |
| Daun  | 0.0000125 | 8  | 1.584 | 0.62  | 0.62  |
| Daun  | 0.0000125 | 9  | 1.571 | 0.622 | 0.622 |
| Daun  | 0.0000125 | 10 | 1.241 | 0.572 | 0.572 |
| Daun  | 0.0000125 | 11 | 1.579 | 0.634 | 0.634 |
| Daun  | 0.0000125 | 12 | 1.382 | 0.577 | 0.577 |
| Daun  | 0.0000125 | 13 | 1.573 | 0.617 | 0.617 |
| Daun  | 0.0000125 | 14 | 1.319 | 0.571 | 0.571 |
| Daun  | 0.0000125 | 15 | 1.57  | 0.634 | 0.634 |
| Daun  | 0.0000125 | 16 | 1.15  | 0.524 | 0.524 |
| Daun  | 0.0000125 | 17 | 1.283 | 0.563 | 0.563 |
| Daun  | 0.0000125 | 18 | 1.594 | 0.619 | 0.619 |
| Daun  | 0.0000125 | 19 | 1.61  | 0.619 | 0.619 |
| Daun  | 0.0000125 | 20 | 1.62  | 0.627 | 0.627 |
| Daun  | 0.0000125 | 21 | 1.516 | 0.612 | 0.612 |
| Daun  | 0.0000125 | 22 | 1.48  | 0.607 | 0.607 |
| Daun  | 0.000025  | 1  | 1.289 | 0.586 | 0.586 |
| Daun  | 0.000025  | 2  | 1.393 | 0.611 | 0.611 |
| Daun  | 0.000025  | 3  | 1.443 | 0.624 | 0.624 |
| Daun  | 0.000025  | 4  | 1.387 | 0.604 | 0.604 |
| Daun  | 0.000025  | 5  | 1.524 | 0.624 | 0.624 |
| Daun  | 0.000025  | 6  | 1.402 | 0.603 | 0.603 |
| Daun  | 0.000025  | 7  | 1.439 | 0.618 | 0.618 |

|      |          |    |       |       |       |
|------|----------|----|-------|-------|-------|
| Daun | 0.000025 | 8  | 1.399 | 0.609 | 0.609 |
| Daun | 0.000025 | 9  | 1.391 | 0.606 | 0.606 |
| Daun | 0.000025 | 10 | 1.453 | 0.622 | 0.622 |
| Daun | 0.000025 | 11 | 1.407 | 0.604 | 0.604 |
| Daun | 0.000025 | 12 | 1.436 | 0.61  | 0.61  |
| Daun | 0.000025 | 13 | 1.383 | 0.595 | 0.595 |
| Daun | 0.000025 | 14 | 1.462 | 0.616 | 0.616 |
| Daun | 0.000025 | 15 | 1.346 | 0.59  | 0.59  |
| Daun | 0.000025 | 16 | 1.363 | 0.588 | 0.588 |
| Daun | 0.000025 | 17 | 1.518 | 0.612 | 0.612 |
| Daun | 0.000025 | 18 | 1.409 | 0.624 | 0.624 |
| Daun | 0.000025 | 19 | 1.447 | 0.605 | 0.605 |
| Daun | 0.000025 | 20 | 1.438 | 0.609 | 0.609 |
| Daun | 0.000025 | 21 | 1.356 | 0.594 | 0.594 |
| Daun | 0.000025 | 22 | 1.327 | 0.589 | 0.589 |
| Daun | 0.00005  | 1  | 1.244 | 0.562 | 0.562 |
| Daun | 0.00005  | 2  | 1.268 | 0.575 | 0.575 |
| Daun | 0.00005  | 3  | 1.337 | 0.594 | 0.594 |
| Daun | 0.00005  | 4  | 1.298 | 0.574 | 0.574 |
| Daun | 0.00005  | 5  | 1.421 | 0.603 | 0.603 |
| Daun | 0.00005  | 6  | 1.313 | 0.58  | 0.58  |
| Daun | 0.00005  | 7  | 1.314 | 0.59  | 0.59  |
| Daun | 0.00005  | 8  | 1.322 | 0.584 | 0.584 |
| Daun | 0.00005  | 9  | 1.279 | 0.587 | 0.587 |
| Daun | 0.00005  | 10 | 1.325 | 0.59  | 0.59  |
| Daun | 0.00005  | 11 | 1.291 | 0.577 | 0.577 |
| Daun | 0.00005  | 12 | 1.332 | 0.587 | 0.587 |
| Daun | 0.00005  | 13 | 1.27  | 0.566 | 0.566 |
| Daun | 0.00005  | 14 | 1.359 | 0.589 | 0.589 |
| Daun | 0.00005  | 15 | 1.272 | 0.571 | 0.571 |
| Daun | 0.00005  | 16 | 1.251 | 0.565 | 0.565 |
| Daun | 0.00005  | 17 | 1.379 | 0.584 | 0.584 |
| Daun | 0.00005  | 18 | 1.329 | 0.585 | 0.585 |
| Daun | 0.00005  | 19 | 1.327 | 0.58  | 0.58  |
| Daun | 0.00005  | 20 | 1.335 | 0.588 | 0.588 |
| Daun | 0.00005  | 21 | 1.261 | 0.57  | 0.57  |
| Daun | 0.00005  | 22 | 1.267 | 0.565 | 0.565 |
| Daun | 0.0001   | 1  | 1.094 | 0.513 | 0.513 |
| Daun | 0.0001   | 2  | 1.123 | 0.531 | 0.531 |
| Daun | 0.0001   | 3  | 1.181 | 0.552 | 0.552 |
| Daun | 0.0001   | 4  | 1.16  | 0.543 | 0.543 |
| Daun | 0.0001   | 5  | 1.265 | 0.579 | 0.579 |
| Daun | 0.0001   | 6  | 1.152 | 0.54  | 0.54  |
| Daun | 0.0001   | 7  | 1.14  | 0.543 | 0.543 |
| Daun | 0.0001   | 8  | 1.184 | 0.541 | 0.541 |
| Daun | 0.0001   | 9  | 1.155 | 0.538 | 0.538 |
| Daun | 0.0001   | 10 | 1.204 | 0.552 | 0.552 |
| Daun | 0.0001   | 11 | 1.161 | 0.536 | 0.536 |
| Daun | 0.0001   | 12 | 1.176 | 0.551 | 0.551 |



|      |           |    |       |       |       |
|------|-----------|----|-------|-------|-------|
| Daun | 0.0001    | 13 | 1.134 | 0.522 | 0.522 |
| Daun | 0.0001    | 14 | 1.198 | 0.553 | 0.553 |
| Daun | 0.0001    | 15 | 1.128 | 0.529 | 0.529 |
| Daun | 0.0001    | 16 | 1.119 | 0.525 | 0.525 |
| Daun | 0.0001    | 17 | 1.23  | 0.556 | 0.556 |
| Daun | 0.0001    | 18 | 1.178 | 0.551 | 0.551 |
| Daun | 0.0001    | 19 | 1.171 | 0.552 | 0.552 |
| Daun | 0.0001    | 20 | 1.205 | 0.559 | 0.559 |
| Daun | 0.0001    | 21 | 1.126 | 0.53  | 0.53  |
| Daun | 0.0001    | 22 | 1.11  | 0.516 | 0.516 |
| Doc  | 0.0000128 | 1  | 1.249 | 0.577 | 0.577 |
| Doc  | 0.0000128 | 2  | 1.296 | 0.59  | 0.59  |
| Doc  | 0.0000128 | 3  | 1.348 | 0.604 | 0.604 |
| Doc  | 0.0000128 | 4  | 1.317 | 0.592 | 0.592 |
| Doc  | 0.0000128 | 5  | 1.416 | 0.604 | 0.604 |
| Doc  | 0.0000128 | 6  | 1.324 | 0.589 | 0.589 |
| Doc  | 0.0000128 | 7  | 1.356 | 0.601 | 0.601 |
| Doc  | 0.0000128 | 8  | 1.372 | 0.603 | 0.603 |
| Doc  | 0.0000128 | 9  | 1.28  | 0.584 | 0.584 |
| Doc  | 0.0000128 | 10 | 1.368 | 0.61  | 0.61  |
| Doc  | 0.0000128 | 11 | 1.324 | 0.593 | 0.593 |
| Doc  | 0.0000128 | 12 | 1.361 | 0.595 | 0.595 |
| Doc  | 0.0000128 | 13 | 1.326 | 0.602 | 0.602 |
| Doc  | 0.0000128 | 14 | 1.409 | 0.606 | 0.606 |
| Doc  | 0.0000128 | 15 | 1.289 | 0.592 | 0.592 |
| Doc  | 0.0000128 | 16 | 1.313 | 0.574 | 0.574 |
| Doc  | 0.0000128 | 17 | 1.421 | 0.604 | 0.604 |
| Doc  | 0.0000128 | 18 | 1.387 | 0.61  | 0.61  |
| Doc  | 0.0000128 | 19 | 1.378 | 0.613 | 0.613 |
| Doc  | 0.0000128 | 20 | 1.383 | 0.605 | 0.605 |
| Doc  | 0.0000128 | 21 | 1.302 | 0.583 | 0.583 |
| Doc  | 0.0000128 | 22 | 1.237 | 0.559 | 0.559 |
| Doc  | 0.000032  | 1  | 1.467 | 0.617 | 0.617 |
| Doc  | 0.000032  | 2  | 1.527 | 0.61  | 0.61  |
| Doc  | 0.000032  | 3  | 1.6   | 0.621 | 0.621 |
| Doc  | 0.000032  | 4  | 1.579 | 0.619 | 0.619 |
| Doc  | 0.000032  | 5  | 1.649 | 0.62  | 0.649 |
| Doc  | 0.000032  | 6  | 1.569 | 0.624 | 0.624 |
| Doc  | 0.000032  | 7  | 1.58  | 0.618 | 0.618 |
| Doc  | 0.000032  | 8  | 1.595 | 0.612 | 0.612 |
| Doc  | 0.000032  | 9  | 1.569 | 0.622 | 0.622 |
| Doc  | 0.000032  | 10 | 1.65  | 0.626 | 0.65  |
| Doc  | 0.000032  | 11 | 1.562 | 0.627 | 0.627 |
| Doc  | 0.000032  | 12 | 1.565 | 0.621 | 0.621 |
| Doc  | 0.000032  | 13 | 1.511 | 0.61  | 0.61  |
| Doc  | 0.000032  | 14 | 1.615 | 0.624 | 0.624 |
| Doc  | 0.000032  | 15 | 1.542 | 0.637 | 0.637 |
| Doc  | 0.000032  | 16 | 1.494 | 0.588 | 0.588 |
| Doc  | 0.000032  | 17 | 1.639 | 0.61  | 0.639 |

|     |          |    |       |       |       |
|-----|----------|----|-------|-------|-------|
| Doc | 0.000032 | 18 | 1.577 | 0.619 | 0.619 |
| Doc | 0.000032 | 19 | 1.62  | 0.62  | 0.62  |
| Doc | 0.000032 | 20 | 1.638 | 0.631 | 0.638 |
| Doc | 0.000032 | 21 | 1.59  | 0.613 | 0.613 |
| Doc | 0.000032 | 22 | 1.483 | 0.612 | 0.612 |
| Doc | 0.00008  | 1  | 1.388 | 0.607 | 0.607 |
| Doc | 0.00008  | 2  | 1.421 | 0.6   | 0.6   |
| Doc | 0.00008  | 3  | 1.502 | 0.623 | 0.623 |
| Doc | 0.00008  | 4  | 1.475 | 0.612 | 0.612 |
| Doc | 0.00008  | 5  | 1.578 | 0.617 | 0.617 |
| Doc | 0.00008  | 6  | 1.464 | 0.614 | 0.614 |
| Doc | 0.00008  | 7  | 1.444 | 0.613 | 0.613 |
| Doc | 0.00008  | 8  | 1.492 | 0.606 | 0.606 |
| Doc | 0.00008  | 9  | 1.429 | 0.615 | 0.615 |
| Doc | 0.00008  | 10 | 1.527 | 0.621 | 0.621 |
| Doc | 0.00008  | 11 | 1.445 | 0.612 | 0.612 |
| Doc | 0.00008  | 12 | 1.48  | 0.624 | 0.624 |
| Doc | 0.00008  | 13 | 1.466 | 0.613 | 0.613 |
| Doc | 0.00008  | 14 | 1.504 | 0.612 | 0.612 |
| Doc | 0.00008  | 15 | 1.445 | 0.613 | 0.613 |
| Doc | 0.00008  | 16 | 1.373 | 0.595 | 0.595 |
| Doc | 0.00008  | 17 | 1.511 | 0.603 | 0.603 |
| Doc | 0.00008  | 18 | 1.523 | 0.618 | 0.618 |
| Doc | 0.00008  | 19 | 1.482 | 0.607 | 0.607 |
| Doc | 0.00008  | 20 | 1.537 | 0.628 | 0.628 |
| Doc | 0.00008  | 21 | 1.428 | 0.607 | 0.607 |
| Doc | 0.00008  | 22 | 1.425 | 0.591 | 0.591 |
| Doc | 0.0002   | 1  | 1.156 | 0.545 | 0.545 |
| Doc | 0.0002   | 2  | 1.21  | 0.559 | 0.559 |
| Doc | 0.0002   | 3  | 1.256 | 0.579 | 0.579 |
| Doc | 0.0002   | 4  | 1.216 | 0.558 | 0.558 |
| Doc | 0.0002   | 5  | 1.319 | 0.59  | 0.59  |
| Doc | 0.0002   | 6  | 1.226 | 0.572 | 0.572 |
| Doc | 0.0002   | 7  | 1.226 | 0.567 | 0.567 |
| Doc | 0.0002   | 8  | 1.248 | 0.567 | 0.567 |
| Doc | 0.0002   | 9  | 1.2   | 0.559 | 0.559 |
| Doc | 0.0002   | 10 | 1.267 | 0.576 | 0.576 |
| Doc | 0.0002   | 11 | 1.209 | 0.567 | 0.567 |
| Doc | 0.0002   | 12 | 1.246 | 0.57  | 0.57  |
| Doc | 0.0002   | 13 | 1.198 | 0.555 | 0.555 |
| Doc | 0.0002   | 14 | 1.28  | 0.577 | 0.577 |
| Doc | 0.0002   | 15 | 1.209 | 0.554 | 0.554 |
| Doc | 0.0002   | 16 | 1.191 | 0.537 | 0.537 |
| Doc | 0.0002   | 17 | 1.294 | 0.585 | 0.585 |
| Doc | 0.0002   | 18 | 1.234 | 0.579 | 0.579 |
| Doc | 0.0002   | 19 | 1.266 | 0.579 | 0.579 |
| Doc | 0.0002   | 20 | 1.287 | 0.584 | 0.584 |
| Doc | 0.0002   | 21 | 1.182 | 0.561 | 0.561 |
| Doc | 0.0002   | 22 | 1.138 | 0.534 | 0.534 |

|     |          |    |       |       |       |
|-----|----------|----|-------|-------|-------|
| Dox | 0.000006 | 1  | 1.214 | 0.566 | 0.566 |
| Dox | 0.000006 | 2  | 1.287 | 0.583 | 0.583 |
| Dox | 0.000006 | 3  | 1.375 | 0.614 | 0.614 |
| Dox | 0.000006 | 4  | 1.318 | 0.587 | 0.587 |
| Dox | 0.000006 | 5  | 1.431 | 0.62  | 0.62  |
| Dox | 0.000006 | 6  | 1.307 | 0.59  | 0.59  |
| Dox | 0.000006 | 7  | 1.294 | 0.587 | 0.587 |
| Dox | 0.000006 | 8  | 1.318 | 0.579 | 0.579 |
| Dox | 0.000006 | 9  | 1.324 | 0.592 | 0.592 |
| Dox | 0.000006 | 10 | 1.375 | 0.6   | 0.6   |
| Dox | 0.000006 | 11 | 1.309 | 0.599 | 0.599 |
| Dox | 0.000006 | 12 | 1.329 | 0.595 | 0.595 |
| Dox | 0.000006 | 13 | 1.293 | 0.587 | 0.587 |
| Dox | 0.000006 | 14 | 1.371 | 0.598 | 0.598 |
| Dox | 0.000006 | 15 | 1.286 | 0.575 | 0.575 |
| Dox | 0.000006 | 16 | 1.275 | 0.571 | 0.571 |
| Dox | 0.000006 | 17 | 1.376 | 0.6   | 0.6   |
| Dox | 0.000006 | 18 | 1.387 | 0.608 | 0.608 |
| Dox | 0.000006 | 19 | 1.359 | 0.609 | 0.609 |
| Dox | 0.000006 | 20 | 1.385 | 0.613 | 0.613 |
| Dox | 0.000006 | 21 | 1.282 | 0.589 | 0.589 |
| Dox | 0.000006 | 22 | 1.234 | 0.559 | 0.559 |
| Dox | 0.000013 | 1  | 1.329 | 0.596 | 0.596 |
| Dox | 0.000013 | 2  | 1.379 | 0.608 | 0.608 |
| Dox | 0.000013 | 3  | 1.43  | 0.628 | 0.628 |
| Dox | 0.000013 | 4  | 1.4   | 0.609 | 0.609 |
| Dox | 0.000013 | 5  | 1.548 | 0.62  | 0.62  |
| Dox | 0.000013 | 6  | 1.407 | 0.604 | 0.604 |
| Dox | 0.000013 | 7  | 1.375 | 0.609 | 0.609 |
| Dox | 0.000013 | 8  | 1.436 | 0.617 | 0.617 |
| Dox | 0.000013 | 9  | 1.39  | 0.611 | 0.611 |
| Dox | 0.000013 | 10 | 1.447 | 0.616 | 0.616 |
| Dox | 0.000013 | 11 | 1.387 | 0.608 | 0.608 |
| Dox | 0.000013 | 12 | 1.401 | 0.613 | 0.613 |
| Dox | 0.000013 | 13 | 1.366 | 0.596 | 0.596 |
| Dox | 0.000013 | 14 | 1.459 | 0.621 | 0.621 |
| Dox | 0.000013 | 15 | 1.391 | 0.599 | 0.599 |
| Dox | 0.000013 | 16 | 1.396 | 0.591 | 0.591 |
| Dox | 0.000013 | 17 | 1.456 | 0.601 | 0.601 |
| Dox | 0.000013 | 18 | 1.436 | 0.623 | 0.623 |
| Dox | 0.000013 | 19 | 1.399 | 0.602 | 0.602 |
| Dox | 0.000013 | 20 | 1.463 | 0.617 | 0.617 |
| Dox | 0.000013 | 21 | 1.42  | 0.617 | 0.617 |
| Dox | 0.000013 | 22 | 1.322 | 0.583 | 0.583 |
| Dox | 0.000025 | 1  | 1.357 | 0.598 | 0.598 |
| Dox | 0.000025 | 2  | 1.384 | 0.604 | 0.604 |
| Dox | 0.000025 | 3  | 1.438 | 0.615 | 0.615 |
| Dox | 0.000025 | 4  | 1.285 | 0.57  | 0.57  |
| Dox | 0.000025 | 5  | 1.372 | 0.593 | 0.593 |

|     |          |    |       |       |       |
|-----|----------|----|-------|-------|-------|
| Dox | 0.000025 | 6  | 1.404 | 0.605 | 0.605 |
| Dox | 0.000025 | 7  | 1.415 | 0.609 | 0.609 |
| Dox | 0.000025 | 8  | 1.461 | 0.602 | 0.602 |
| Dox | 0.000025 | 9  | 1.378 | 0.61  | 0.61  |
| Dox | 0.000025 | 10 | 1.455 | 0.607 | 0.607 |
| Dox | 0.000025 | 11 | 1.381 | 0.598 | 0.598 |
| Dox | 0.000025 | 12 | 1.457 | 0.617 | 0.617 |
| Dox | 0.000025 | 13 | 1.372 | 0.602 | 0.602 |
| Dox | 0.000025 | 14 | 1.326 | 0.58  | 0.58  |
| Dox | 0.000025 | 15 | 1.343 | 0.601 | 0.601 |
| Dox | 0.000025 | 16 | 1.392 | 0.581 | 0.581 |
| Dox | 0.000025 | 17 | 1.334 | 0.582 | 0.582 |
| Dox | 0.000025 | 18 | 1.433 | 0.602 | 0.602 |
| Dox | 0.000025 | 19 | 1.461 | 0.603 | 0.603 |
| Dox | 0.000025 | 20 | 1.459 | 0.613 | 0.613 |
| Dox | 0.000025 | 21 | 1.421 | 0.623 | 0.623 |
| Dox | 0.000025 | 22 | 1.353 | 0.593 | 0.593 |
| Dox | 0.00005  | 1  | 1.068 | 0.508 | 0.508 |
| Dox | 0.00005  | 2  | 1.085 | 0.523 | 0.523 |
| Dox | 0.00005  | 3  | 1.167 | 0.548 | 0.548 |
| Dox | 0.00005  | 4  | 1.142 | 0.542 | 0.542 |
| Dox | 0.00005  | 5  | 1.225 | 0.564 | 0.564 |
| Dox | 0.00005  | 6  | 1.126 | 0.535 | 0.535 |
| Dox | 0.00005  | 7  | 1.126 | 0.536 | 0.536 |
| Dox | 0.00005  | 8  | 1.138 | 0.538 | 0.538 |
| Dox | 0.00005  | 9  | 1.108 | 0.535 | 0.535 |
| Dox | 0.00005  | 10 | 1.182 | 0.549 | 0.549 |
| Dox | 0.00005  | 11 | 1.141 | 0.53  | 0.53  |
| Dox | 0.00005  | 12 | 1.175 | 0.543 | 0.543 |
| Dox | 0.00005  | 13 | 1.117 | 0.526 | 0.526 |
| Dox | 0.00005  | 14 | 1.193 | 0.541 | 0.541 |
| Dox | 0.00005  | 15 | 1.104 | 0.524 | 0.524 |
| Dox | 0.00005  | 16 | 1.099 | 0.51  | 0.51  |
| Dox | 0.00005  | 17 | 1.218 | 0.558 | 0.558 |
| Dox | 0.00005  | 18 | 1.151 | 0.539 | 0.539 |
| Dox | 0.00005  | 19 | 1.181 | 0.554 | 0.554 |
| Dox | 0.00005  | 20 | 1.189 | 0.548 | 0.548 |
| Dox | 0.00005  | 21 | 1.129 | 0.531 | 0.531 |
| Dox | 0.00005  | 22 | 1.104 | 0.509 | 0.509 |
| Epi | 0.000063 | 1  | 1.375 | 0.601 | 0.601 |
| Epi | 0.000063 | 2  | 1.423 | 0.603 | 0.603 |
| Epi | 0.000063 | 3  | 1.561 | 0.631 | 0.631 |
| Epi | 0.000063 | 4  | 1.457 | 0.607 | 0.607 |
| Epi | 0.000063 | 5  | 1.57  | 0.619 | 0.619 |
| Epi | 0.000063 | 6  | 1.567 | 0.615 | 0.615 |
| Epi | 0.000063 | 7  | 1.533 | 0.626 | 0.626 |
| Epi | 0.000063 | 8  | 1.476 | 0.609 | 0.609 |
| Epi | 0.000063 | 9  | 1.536 | 0.639 | 0.639 |
| Epi | 0.000063 | 10 | 1.565 | 0.623 | 0.623 |

|     |           |    |       |       |       |
|-----|-----------|----|-------|-------|-------|
| Epi | 0.0000063 | 11 | 1.483 | 0.614 | 0.614 |
| Epi | 0.0000063 | 12 | 1.566 | 0.622 | 0.622 |
| Epi | 0.0000063 | 13 | 1.503 | 0.62  | 0.62  |
| Epi | 0.0000063 | 14 | 1.564 | 0.614 | 0.614 |
| Epi | 0.0000063 | 15 | 1.506 | 0.621 | 0.621 |
| Epi | 0.0000063 | 16 | 1.523 | 0.611 | 0.611 |
| Epi | 0.0000063 | 17 | 1.554 | 0.605 | 0.605 |
| Epi | 0.0000063 | 18 | 1.54  | 0.633 | 0.633 |
| Epi | 0.0000063 | 19 | 1.628 | 0.636 | 0.636 |
| Epi | 0.0000063 | 20 | 1.582 | 0.624 | 0.624 |
| Epi | 0.0000063 | 21 | 1.512 | 0.616 | 0.616 |
| Epi | 0.0000063 | 22 | 1.447 | 0.61  | 0.61  |
| Epi | 0.000025  | 1  | 1.042 | 0.504 | 0.504 |
| Epi | 0.000025  | 2  | 1.112 | 0.529 | 0.529 |
| Epi | 0.000025  | 3  | 1.168 | 0.544 | 0.544 |
| Epi | 0.000025  | 4  | 1.126 | 0.537 | 0.537 |
| Epi | 0.000025  | 5  | 1.225 | 0.563 | 0.563 |
| Epi | 0.000025  | 6  | 1.139 | 0.533 | 0.533 |
| Epi | 0.000025  | 7  | 1.12  | 0.528 | 0.528 |
| Epi | 0.000025  | 8  | 1.153 | 0.536 | 0.536 |
| Epi | 0.000025  | 9  | 1.122 | 0.53  | 0.53  |
| Epi | 0.000025  | 10 | 1.178 | 0.553 | 0.553 |
| Epi | 0.000025  | 11 | 1.124 | 0.536 | 0.536 |
| Epi | 0.000025  | 12 | 1.163 | 0.547 | 0.547 |
| Epi | 0.000025  | 13 | 1.086 | 0.517 | 0.517 |
| Epi | 0.000025  | 14 | 1.165 | 0.54  | 0.54  |
| Epi | 0.000025  | 15 | 1.101 | 0.518 | 0.518 |
| Epi | 0.000025  | 16 | 1.091 | 0.512 | 0.512 |
| Epi | 0.000025  | 17 | 1.213 | 0.544 | 0.544 |
| Epi | 0.000025  | 18 | 1.15  | 0.547 | 0.547 |
| Epi | 0.000025  | 19 | 1.192 | 0.543 | 0.543 |
| Epi | 0.000025  | 20 | 1.178 | 0.543 | 0.543 |
| Epi | 0.000025  | 21 | 1.138 | 0.54  | 0.54  |
| Epi | 0.000025  | 22 | 1.073 | 0.519 | 0.519 |
| Epi | 0.0001    | 1  | 1.176 | 0.537 | 0.537 |
| Epi | 0.0001    | 2  | 1.214 | 0.557 | 0.557 |
| Epi | 0.0001    | 3  | 1.278 | 0.578 | 0.578 |
| Epi | 0.0001    | 4  | 1.262 | 0.568 | 0.568 |
| Epi | 0.0001    | 5  | 1.388 | 0.593 | 0.593 |
| Epi | 0.0001    | 6  | 1.229 | 0.562 | 0.562 |
| Epi | 0.0001    | 7  | 1.242 | 0.568 | 0.568 |
| Epi | 0.0001    | 8  | 1.276 | 0.571 | 0.571 |
| Epi | 0.0001    | 9  | 1.238 | 0.561 | 0.561 |
| Epi | 0.0001    | 10 | 1.287 | 0.577 | 0.577 |
| Epi | 0.0001    | 11 | 1.235 | 0.573 | 0.573 |
| Epi | 0.0001    | 12 | 1.301 | 0.582 | 0.582 |
| Epi | 0.0001    | 13 | 1.225 | 0.55  | 0.55  |
| Epi | 0.0001    | 14 | 1.284 | 0.577 | 0.577 |
| Epi | 0.0001    | 15 | 1.244 | 0.555 | 0.555 |

|      |          |    |       |       |       |
|------|----------|----|-------|-------|-------|
| Epi  | 0.0001   | 16 | 1.221 | 0.543 | 0.543 |
| Epi  | 0.0001   | 17 | 1.344 | 0.574 | 0.574 |
| Epi  | 0.0001   | 18 | 1.246 | 0.578 | 0.578 |
| Epi  | 0.0001   | 19 | 1.275 | 0.578 | 0.578 |
| Epi  | 0.0001   | 20 | 1.29  | 0.584 | 0.584 |
| Epi  | 0.0001   | 21 | 1.227 | 0.559 | 0.559 |
| Epi  | 0.0001   | 22 | 1.156 | 0.546 | 0.546 |
| Epi  | 0.0004   | 1  | 1.393 | 0.601 | 0.601 |
| Epi  | 0.0004   | 2  | 1.452 | 0.616 | 0.616 |
| Epi  | 0.0004   | 3  | 1.559 | 0.622 | 0.622 |
| Epi  | 0.0004   | 4  | 1.498 | 0.616 | 0.616 |
| Epi  | 0.0004   | 5  | 1.594 | 0.623 | 0.623 |
| Epi  | 0.0004   | 6  | 1.476 | 0.604 | 0.604 |
| Epi  | 0.0004   | 7  | 1.491 | 0.617 | 0.617 |
| Epi  | 0.0004   | 8  | 1.506 | 0.607 | 0.607 |
| Epi  | 0.0004   | 9  | 1.499 | 0.617 | 0.617 |
| Epi  | 0.0004   | 10 | 1.543 | 0.62  | 0.62  |
| Epi  | 0.0004   | 11 | 1.515 | 0.609 | 0.609 |
| Epi  | 0.0004   | 12 | 1.55  | 0.622 | 0.622 |
| Epi  | 0.0004   | 13 | 1.462 | 0.598 | 0.598 |
| Epi  | 0.0004   | 14 | 1.556 | 0.62  | 0.62  |
| Epi  | 0.0004   | 15 | 1.476 | 0.609 | 0.609 |
| Epi  | 0.0004   | 16 | 1.45  | 0.591 | 0.591 |
| Epi  | 0.0004   | 17 | 1.574 | 0.604 | 0.604 |
| Epi  | 0.0004   | 18 | 1.496 | 0.62  | 0.62  |
| Epi  | 0.0004   | 19 | 1.527 | 0.616 | 0.616 |
| Epi  | 0.0004   | 20 | 1.53  | 0.614 | 0.614 |
| Epi  | 0.0004   | 21 | 1.576 | 0.617 | 0.617 |
| Epi  | 0.0004   | 22 | 1.432 | 0.598 | 0.598 |
| Etop | 0.000117 | 1  | 1.095 | 0.522 | 0.522 |
| Etop | 0.000117 | 2  | 1.155 | 0.539 | 0.539 |
| Etop | 0.000117 | 3  | 1.183 | 0.556 | 0.556 |
| Etop | 0.000117 | 4  | 1.205 | 0.549 | 0.549 |
| Etop | 0.000117 | 5  | 1.265 | 0.573 | 0.573 |
| Etop | 0.000117 | 6  | 1.161 | 0.543 | 0.543 |
| Etop | 0.000117 | 7  | 1.176 | 0.555 | 0.555 |
| Etop | 0.000117 | 8  | 1.191 | 0.555 | 0.555 |
| Etop | 0.000117 | 9  | 1.152 | 0.547 | 0.547 |
| Etop | 0.000117 | 10 | 1.216 | 0.559 | 0.559 |
| Etop | 0.000117 | 11 | 1.167 | 0.538 | 0.538 |
| Etop | 0.000117 | 12 | 1.208 | 0.549 | 0.549 |
| Etop | 0.000117 | 13 | 1.149 | 0.524 | 0.524 |
| Etop | 0.000117 | 14 | 1.216 | 0.561 | 0.561 |
| Etop | 0.000117 | 15 | 1.129 | 0.543 | 0.543 |
| Etop | 0.000117 | 16 | 1.156 | 0.532 | 0.532 |
| Etop | 0.000117 | 17 | 1.249 | 0.558 | 0.558 |
| Etop | 0.000117 | 18 | 1.196 | 0.56  | 0.56  |
| Etop | 0.000117 | 19 | 1.186 | 0.553 | 0.553 |
| Etop | 0.000117 | 20 | 1.213 | 0.57  | 0.57  |

|      |          |    |       |       |       |
|------|----------|----|-------|-------|-------|
| Etop | 0.000117 | 21 | 1.162 | 0.541 | 0.541 |
| Etop | 0.000117 | 22 | 1.134 | 0.527 | 0.527 |
| Etop | 0.000408 | 1  | 1.291 | 0.579 | 0.579 |
| Etop | 0.000408 | 2  | 1.376 | 0.594 | 0.594 |
| Etop | 0.000408 | 3  | 1.398 | 0.603 | 0.603 |
| Etop | 0.000408 | 4  | 1.379 | 0.597 | 0.597 |
| Etop | 0.000408 | 5  | 1.499 | 0.606 | 0.606 |
| Etop | 0.000408 | 6  | 1.379 | 0.588 | 0.588 |
| Etop | 0.000408 | 7  | 1.406 | 0.61  | 0.61  |
| Etop | 0.000408 | 8  | 1.424 | 0.604 | 0.604 |
| Etop | 0.000408 | 9  | 1.384 | 0.598 | 0.598 |
| Etop | 0.000408 | 10 | 1.434 | 0.611 | 0.611 |
| Etop | 0.000408 | 11 | 1.381 | 0.596 | 0.596 |
| Etop | 0.000408 | 12 | 1.4   | 0.605 | 0.605 |
| Etop | 0.000408 | 13 | 1.329 | 0.594 | 0.594 |
| Etop | 0.000408 | 14 | 1.445 | 0.601 | 0.601 |
| Etop | 0.000408 | 15 | 1.353 | 0.599 | 0.599 |
| Etop | 0.000408 | 16 | 1.352 | 0.578 | 0.578 |
| Etop | 0.000408 | 17 | 1.491 | 0.593 | 0.593 |
| Etop | 0.000408 | 18 | 1.39  | 0.599 | 0.599 |
| Etop | 0.000408 | 19 | 1.462 | 0.593 | 0.593 |
| Etop | 0.000408 | 20 | 1.466 | 0.62  | 0.62  |
| Etop | 0.000408 | 21 | 1.371 | 0.597 | 0.597 |
| Etop | 0.000408 | 22 | 1.37  | 0.587 | 0.587 |
| Etop | 0.001429 | 1  | 1.229 | 0.566 | 0.566 |
| Etop | 0.001429 | 2  | 1.264 | 0.577 | 0.577 |
| Etop | 0.001429 | 3  | 1.337 | 0.596 | 0.596 |
| Etop | 0.001429 | 4  | 1.308 | 0.587 | 0.587 |
| Etop | 0.001429 | 5  | 1.428 | 0.601 | 0.601 |
| Etop | 0.001429 | 6  | 1.291 | 0.582 | 0.582 |
| Etop | 0.001429 | 7  | 1.293 | 0.585 | 0.585 |
| Etop | 0.001429 | 8  | 1.313 | 0.587 | 0.587 |
| Etop | 0.001429 | 9  | 1.315 | 0.58  | 0.58  |
| Etop | 0.001429 | 10 | 1.347 | 0.595 | 0.595 |
| Etop | 0.001429 | 11 | 1.309 | 0.584 | 0.584 |
| Etop | 0.001429 | 12 | 1.35  | 0.596 | 0.596 |
| Etop | 0.001429 | 13 | 1.297 | 0.581 | 0.581 |
| Etop | 0.001429 | 14 | 1.378 | 0.59  | 0.59  |
| Etop | 0.001429 | 15 | 1.249 | 0.569 | 0.569 |
| Etop | 0.001429 | 16 | 1.297 | 0.564 | 0.564 |
| Etop | 0.001429 | 17 | 1.417 | 0.595 | 0.595 |
| Etop | 0.001429 | 18 | 1.328 | 0.592 | 0.592 |
| Etop | 0.001429 | 19 | 1.344 | 0.598 | 0.598 |
| Etop | 0.001429 | 20 | 1.358 | 0.601 | 0.601 |
| Etop | 0.001429 | 21 | 1.266 | 0.588 | 0.588 |
| Etop | 0.001429 | 22 | 1.274 | 0.566 | 0.566 |
| Etop | 0.005    | 1  | 1.481 | 0.617 | 0.617 |
| Etop | 0.005    | 2  | 1.543 | 0.628 | 0.628 |
| Etop | 0.005    | 3  | 1.607 | 0.631 | 0.631 |

|      |           |    |       |       |       |
|------|-----------|----|-------|-------|-------|
| Etop | 0.005     | 4  | 1.577 | 0.627 | 0.627 |
| Etop | 0.005     | 5  | 1.68  | 0.616 | 0.68  |
| Etop | 0.005     | 6  | 1.557 | 0.626 | 0.626 |
| Etop | 0.005     | 7  | 1.545 | 0.633 | 0.633 |
| Etop | 0.005     | 8  | 1.603 | 0.622 | 0.622 |
| Etop | 0.005     | 9  | 1.562 | 0.622 | 0.622 |
| Etop | 0.005     | 10 | 1.623 | 0.628 | 0.628 |
| Etop | 0.005     | 11 | 1.571 | 0.626 | 0.626 |
| Etop | 0.005     | 12 | 1.641 | 0.632 | 0.641 |
| Etop | 0.005     | 13 | 1.582 | 0.63  | 0.63  |
| Etop | 0.005     | 14 | 1.657 | 0.628 | 0.657 |
| Etop | 0.005     | 15 | 1.506 | 0.616 | 0.616 |
| Etop | 0.005     | 16 | 1.539 | 0.619 | 0.619 |
| Etop | 0.005     | 17 | 1.644 | 0.616 | 0.644 |
| Etop | 0.005     | 18 | 1.598 | 0.627 | 0.627 |
| Etop | 0.005     | 19 | 1.654 | 0.625 | 0.654 |
| Etop | 0.005     | 20 | 1.602 | 0.636 | 0.636 |
| Etop | 0.005     | 21 | 1.506 | 0.624 | 0.624 |
| Etop | 0.005     | 22 | 1.504 | 0.612 | 0.612 |
| Flox | 0.0023324 | 1  | 1.412 | 0.6   | 0.6   |
| Flox | 0.0023324 | 2  | 1.5   | 0.611 | 0.611 |
| Flox | 0.0023324 | 3  | 1.544 | 0.622 | 0.622 |
| Flox | 0.0023324 | 4  | 1.494 | 0.615 | 0.615 |
| Flox | 0.0023324 | 5  | 1.562 | 0.608 | 0.608 |
| Flox | 0.0023324 | 6  | 1.508 | 0.621 | 0.621 |
| Flox | 0.0023324 | 7  | 1.481 | 0.612 | 0.612 |
| Flox | 0.0023324 | 8  | 1.522 | 0.612 | 0.612 |
| Flox | 0.0023324 | 9  | 1.488 | 0.607 | 0.607 |
| Flox | 0.0023324 | 10 | 1.522 | 0.617 | 0.617 |
| Flox | 0.0023324 | 11 | 1.48  | 0.624 | 0.624 |
| Flox | 0.0023324 | 12 | 1.526 | 0.613 | 0.613 |
| Flox | 0.0023324 | 13 | 1.43  | 0.607 | 0.607 |
| Flox | 0.0023324 | 14 | 1.537 | 0.605 | 0.605 |
| Flox | 0.0023324 | 15 | 1.464 | 0.611 | 0.611 |
| Flox | 0.0023324 | 16 | 1.461 | 0.601 | 0.601 |
| Flox | 0.0023324 | 17 | 1.583 | 0.621 | 0.621 |
| Flox | 0.0023324 | 18 | 1.528 | 0.618 | 0.618 |
| Flox | 0.0023324 | 19 | 1.563 | 0.627 | 0.627 |
| Flox | 0.0023324 | 20 | 1.568 | 0.613 | 0.613 |
| Flox | 0.0023324 | 21 | 1.49  | 0.617 | 0.617 |
| Flox | 0.0023324 | 22 | 1.45  | 0.612 | 0.612 |
| Flox | 0.0081633 | 1  | 1.475 | 0.616 | 0.616 |
| Flox | 0.0081633 | 2  | 1.54  | 0.624 | 0.624 |
| Flox | 0.0081633 | 3  | 1.585 | 0.63  | 0.63  |
| Flox | 0.0081633 | 4  | 1.537 | 0.617 | 0.617 |
| Flox | 0.0081633 | 5  | 1.633 | 0.611 | 0.633 |
| Flox | 0.0081633 | 6  | 1.572 | 0.631 | 0.631 |
| Flox | 0.0081633 | 7  | 1.538 | 0.622 | 0.622 |
| Flox | 0.0081633 | 8  | 1.58  | 0.626 | 0.626 |



|      |           |    |       |       |       |
|------|-----------|----|-------|-------|-------|
| Flox | 0.0081633 | 9  | 1.551 | 0.616 | 0.616 |
| Flox | 0.0081633 | 10 | 1.589 | 0.62  | 0.62  |
| Flox | 0.0081633 | 11 | 1.55  | 0.628 | 0.628 |
| Flox | 0.0081633 | 12 | 1.553 | 0.619 | 0.619 |
| Flox | 0.0081633 | 13 | 1.492 | 0.611 | 0.611 |
| Flox | 0.0081633 | 14 | 1.577 | 0.608 | 0.608 |
| Flox | 0.0081633 | 15 | 1.524 | 0.624 | 0.624 |
| Flox | 0.0081633 | 16 | 1.5   | 0.614 | 0.614 |
| Flox | 0.0081633 | 17 | 1.6   | 0.614 | 0.614 |
| Flox | 0.0081633 | 18 | 1.573 | 0.622 | 0.622 |
| Flox | 0.0081633 | 19 | 1.626 | 0.638 | 0.638 |
| Flox | 0.0081633 | 20 | 1.615 | 0.624 | 0.624 |
| Flox | 0.0081633 | 21 | 1.515 | 0.626 | 0.626 |
| Flox | 0.0081633 | 22 | 1.488 | 0.613 | 0.613 |
| Flox | 0.0285714 | 1  | 1.407 | 0.613 | 0.613 |
| Flox | 0.0285714 | 2  | 1.504 | 0.619 | 0.619 |
| Flox | 0.0285714 | 3  | 1.554 | 0.626 | 0.626 |
| Flox | 0.0285714 | 4  | 1.502 | 0.615 | 0.615 |
| Flox | 0.0285714 | 5  | 1.622 | 0.614 | 0.622 |
| Flox | 0.0285714 | 6  | 1.516 | 0.617 | 0.617 |
| Flox | 0.0285714 | 7  | 1.502 | 0.628 | 0.628 |
| Flox | 0.0285714 | 8  | 1.551 | 0.629 | 0.629 |
| Flox | 0.0285714 | 9  | 1.481 | 0.61  | 0.61  |
| Flox | 0.0285714 | 10 | 1.562 | 0.623 | 0.623 |
| Flox | 0.0285714 | 11 | 1.553 | 0.633 | 0.633 |
| Flox | 0.0285714 | 12 | 1.527 | 0.62  | 0.62  |
| Flox | 0.0285714 | 13 | 1.463 | 0.607 | 0.607 |
| Flox | 0.0285714 | 14 | 1.536 | 0.605 | 0.605 |
| Flox | 0.0285714 | 15 | 1.453 | 0.61  | 0.61  |
| Flox | 0.0285714 | 16 | 1.477 | 0.606 | 0.606 |
| Flox | 0.0285714 | 17 | 1.573 | 0.604 | 0.604 |
| Flox | 0.0285714 | 18 | 1.521 | 0.622 | 0.622 |
| Flox | 0.0285714 | 19 | 1.587 | 0.631 | 0.631 |
| Flox | 0.0285714 | 20 | 1.605 | 0.629 | 0.629 |
| Flox | 0.0285714 | 21 | 1.533 | 0.619 | 0.619 |
| Flox | 0.0285714 | 22 | 1.451 | 0.604 | 0.604 |
| Flox | 0.1       | 1  | 1.397 | 0.617 | 0.617 |
| Flox | 0.1       | 2  | 1.457 | 0.62  | 0.62  |
| Flox | 0.1       | 3  | 1.508 | 0.632 | 0.632 |
| Flox | 0.1       | 4  | 1.444 | 0.62  | 0.62  |
| Flox | 0.1       | 5  | 1.63  | 0.633 | 0.633 |
| Flox | 0.1       | 6  | 1.471 | 0.616 | 0.616 |
| Flox | 0.1       | 7  | 1.477 | 0.624 | 0.624 |
| Flox | 0.1       | 8  | 1.535 | 0.62  | 0.62  |
| Flox | 0.1       | 9  | 1.466 | 0.619 | 0.619 |
| Flox | 0.1       | 10 | 1.498 | 0.63  | 0.63  |
| Flox | 0.1       | 11 | 1.491 | 0.634 | 0.634 |
| Flox | 0.1       | 12 | 1.479 | 0.629 | 0.629 |
| Flox | 0.1       | 13 | 1.475 | 0.618 | 0.618 |

|      |        |    |       |       |       |
|------|--------|----|-------|-------|-------|
| Flox | 0.1    | 14 | 1.547 | 0.622 | 0.622 |
| Flox | 0.1    | 15 | 1.411 | 0.602 | 0.602 |
| Flox | 0.1    | 16 | 1.446 | 0.61  | 0.61  |
| Flox | 0.1    | 17 | 1.569 | 0.61  | 0.61  |
| Flox | 0.1    | 18 | 1.48  | 0.634 | 0.634 |
| Flox | 0.1    | 19 | 1.583 | 0.639 | 0.639 |
| Flox | 0.1    | 20 | 1.551 | 0.634 | 0.634 |
| Flox | 0.1    | 21 | 1.481 | 0.631 | 0.631 |
| Flox | 0.1    | 22 | 1.397 | 0.611 | 0.611 |
| Flud | 0.0064 | 1  | 1.262 | 0.563 | 0.563 |
| Flud | 0.0064 | 2  | 1.31  | 0.581 | 0.581 |
| Flud | 0.0064 | 3  | 1.512 | 0.625 | 0.625 |
| Flud | 0.0064 | 4  | 1.341 | 0.586 | 0.586 |
| Flud | 0.0064 | 5  | 1.466 | 0.615 | 0.615 |
| Flud | 0.0064 | 6  | 1.468 | 0.605 | 0.605 |
| Flud | 0.0064 | 7  | 1.473 | 0.613 | 0.613 |
| Flud | 0.0064 | 8  | 1.396 | 0.602 | 0.602 |
| Flud | 0.0064 | 9  | 1.454 | 0.611 | 0.611 |
| Flud | 0.0064 | 10 | 1.53  | 0.617 | 0.617 |
| Flud | 0.0064 | 11 | 1.474 | 0.612 | 0.612 |
| Flud | 0.0064 | 12 | 1.504 | 0.613 | 0.613 |
| Flud | 0.0064 | 13 | 1.445 | 0.606 | 0.606 |
| Flud | 0.0064 | 14 | 1.406 | 0.599 | 0.599 |
| Flud | 0.0064 | 15 | 1.43  | 0.608 | 0.608 |
| Flud | 0.0064 | 16 | 1.437 | 0.602 | 0.602 |
| Flud | 0.0064 | 17 | 1.401 | 0.59  | 0.59  |
| Flud | 0.0064 | 18 | 1.477 | 0.609 | 0.609 |
| Flud | 0.0064 | 19 | 1.495 | 0.622 | 0.622 |
| Flud | 0.0064 | 20 | 1.514 | 0.621 | 0.621 |
| Flud | 0.0064 | 21 | 1.431 | 0.602 | 0.602 |
| Flud | 0.0064 | 22 | 1.417 | 0.599 | 0.599 |
| Flud | 0.016  | 1  | 1.322 | 0.577 | 0.577 |
| Flud | 0.016  | 2  | 1.341 | 0.587 | 0.587 |
| Flud | 0.016  | 3  | 1.417 | 0.606 | 0.606 |
| Flud | 0.016  | 4  | 1.405 | 0.597 | 0.597 |
| Flud | 0.016  | 5  | 1.502 | 0.628 | 0.628 |
| Flud | 0.016  | 6  | 1.399 | 0.591 | 0.591 |
| Flud | 0.016  | 7  | 1.393 | 0.603 | 0.603 |
| Flud | 0.016  | 8  | 1.403 | 0.608 | 0.608 |
| Flud | 0.016  | 9  | 1.364 | 0.589 | 0.589 |
| Flud | 0.016  | 10 | 1.396 | 0.598 | 0.598 |
| Flud | 0.016  | 11 | 1.396 | 0.597 | 0.597 |
| Flud | 0.016  | 12 | 1.412 | 0.602 | 0.602 |
| Flud | 0.016  | 13 | 1.383 | 0.601 | 0.601 |
| Flud | 0.016  | 14 | 1.418 | 0.602 | 0.602 |
| Flud | 0.016  | 15 | 1.348 | 0.599 | 0.599 |
| Flud | 0.016  | 16 | 1.382 | 0.586 | 0.586 |
| Flud | 0.016  | 17 | 1.468 | 0.591 | 0.591 |
| Flud | 0.016  | 18 | 1.402 | 0.6   | 0.6   |

|      |           |    |       |       |       |
|------|-----------|----|-------|-------|-------|
| Flud | 0.016     | 19 | 1.439 | 0.618 | 0.618 |
| Flud | 0.016     | 20 | 1.433 | 0.611 | 0.611 |
| Flud | 0.016     | 21 | 1.383 | 0.597 | 0.597 |
| Flud | 0.016     | 22 | 1.303 | 0.586 | 0.586 |
| Flud | 0.04      | 1  | 1.294 | 0.58  | 0.58  |
| Flud | 0.04      | 2  | 1.353 | 0.588 | 0.588 |
| Flud | 0.04      | 3  | 1.397 | 0.604 | 0.604 |
| Flud | 0.04      | 4  | 1.265 | 0.57  | 0.57  |
| Flud | 0.04      | 5  | 1.381 | 0.6   | 0.6   |
| Flud | 0.04      | 6  | 1.385 | 0.593 | 0.593 |
| Flud | 0.04      | 7  | 1.351 | 0.591 | 0.591 |
| Flud | 0.04      | 8  | 1.373 | 0.598 | 0.598 |
| Flud | 0.04      | 9  | 1.355 | 0.59  | 0.59  |
| Flud | 0.04      | 10 | 1.411 | 0.597 | 0.597 |
| Flud | 0.04      | 11 | 1.385 | 0.602 | 0.602 |
| Flud | 0.04      | 12 | 1.443 | 0.609 | 0.609 |
| Flud | 0.04      | 13 | 1.385 | 0.592 | 0.592 |
| Flud | 0.04      | 14 | 1.313 | 0.586 | 0.586 |
| Flud | 0.04      | 15 | 1.345 | 0.581 | 0.581 |
| Flud | 0.04      | 16 | 1.356 | 0.581 | 0.581 |
| Flud | 0.04      | 17 | 1.328 | 0.567 | 0.567 |
| Flud | 0.04      | 18 | 1.402 | 0.602 | 0.602 |
| Flud | 0.04      | 19 | 1.421 | 0.603 | 0.603 |
| Flud | 0.04      | 20 | 1.421 | 0.602 | 0.602 |
| Flud | 0.04      | 21 | 1.348 | 0.59  | 0.59  |
| Flud | 0.04      | 22 | 1.288 | 0.572 | 0.572 |
| Flud | 0.1       | 1  | 1.505 | 0.613 | 0.613 |
| Flud | 0.1       | 2  | 1.556 | 0.614 | 0.614 |
| Flud | 0.1       | 3  | 1.622 | 0.617 | 0.622 |
| Flud | 0.1       | 4  | 1.197 | 0.538 | 0.538 |
| Flud | 0.1       | 5  | 1.284 | 0.573 | 0.573 |
| Flud | 0.1       | 6  | 1.601 | 0.615 | 0.615 |
| Flud | 0.1       | 7  | 1.573 | 0.616 | 0.616 |
| Flud | 0.1       | 8  | 1.602 | 0.616 | 0.616 |
| Flud | 0.1       | 9  | 1.576 | 0.613 | 0.613 |
| Flud | 0.1       | 10 | 1.623 | 0.607 | 0.623 |
| Flud | 0.1       | 11 | 1.596 | 0.621 | 0.621 |
| Flud | 0.1       | 12 | 1.653 | 0.622 | 0.653 |
| Flud | 0.1       | 13 | 1.614 | 0.619 | 0.619 |
| Flud | 0.1       | 14 | 1.223 | 0.551 | 0.551 |
| Flud | 0.1       | 15 | 1.552 | 0.607 | 0.607 |
| Flud | 0.1       | 16 | 1.574 | 0.613 | 0.613 |
| Flud | 0.1       | 17 | 1.246 | 0.547 | 0.547 |
| Flud | 0.1       | 18 | 1.612 | 0.62  | 0.62  |
| Flud | 0.1       | 19 | 1.627 | 0.618 | 0.627 |
| Flud | 0.1       | 20 | 1.614 | 0.607 | 0.614 |
| Flud | 0.1       | 21 | 1.543 | 0.616 | 0.616 |
| Flud | 0.1       | 22 | 1.501 | 0.602 | 0.602 |
| Gem  | 0.0000025 | 1  | 1.086 | 0.526 | 0.526 |

|     |           |    |       |       |       |
|-----|-----------|----|-------|-------|-------|
| Gem | 0.0000025 | 2  | 1.147 | 0.54  | 0.54  |
| Gem | 0.0000025 | 3  | 1.211 | 0.577 | 0.577 |
| Gem | 0.0000025 | 4  | 1.19  | 0.557 | 0.557 |
| Gem | 0.0000025 | 5  | 1.285 | 0.577 | 0.577 |
| Gem | 0.0000025 | 6  | 1.177 | 0.559 | 0.559 |
| Gem | 0.0000025 | 7  | 1.172 | 0.556 | 0.556 |
| Gem | 0.0000025 | 8  | 1.19  | 0.562 | 0.562 |
| Gem | 0.0000025 | 9  | 1.145 | 0.548 | 0.548 |
| Gem | 0.0000025 | 10 | 1.21  | 0.571 | 0.571 |
| Gem | 0.0000025 | 11 | 1.164 | 0.543 | 0.543 |
| Gem | 0.0000025 | 12 | 1.165 | 0.554 | 0.554 |
| Gem | 0.0000025 | 13 | 1.13  | 0.543 | 0.543 |
| Gem | 0.0000025 | 14 | 1.214 | 0.563 | 0.563 |
| Gem | 0.0000025 | 15 | 1.111 | 0.542 | 0.542 |
| Gem | 0.0000025 | 16 | 1.131 | 0.535 | 0.535 |
| Gem | 0.0000025 | 17 | 1.281 | 0.576 | 0.576 |
| Gem | 0.0000025 | 18 | 1.204 | 0.564 | 0.564 |
| Gem | 0.0000025 | 19 | 1.194 | 0.564 | 0.564 |
| Gem | 0.0000025 | 20 | 1.196 | 0.564 | 0.564 |
| Gem | 0.0000025 | 21 | 1.154 | 0.54  | 0.54  |
| Gem | 0.0000025 | 22 | 1.092 | 0.527 | 0.527 |
| Gem | 0.000005  | 1  | 1.309 | 0.584 | 0.584 |
| Gem | 0.000005  | 2  | 1.373 | 0.605 | 0.605 |
| Gem | 0.000005  | 3  | 1.442 | 0.613 | 0.613 |
| Gem | 0.000005  | 4  | 1.385 | 0.604 | 0.604 |
| Gem | 0.000005  | 5  | 1.518 | 0.613 | 0.613 |
| Gem | 0.000005  | 6  | 1.395 | 0.616 | 0.616 |
| Gem | 0.000005  | 7  | 1.394 | 0.61  | 0.61  |
| Gem | 0.000005  | 8  | 1.43  | 0.614 | 0.614 |
| Gem | 0.000005  | 9  | 1.405 | 0.617 | 0.617 |
| Gem | 0.000005  | 10 | 1.452 | 0.611 | 0.611 |
| Gem | 0.000005  | 11 | 1.406 | 0.603 | 0.603 |
| Gem | 0.000005  | 12 | 1.409 | 0.612 | 0.612 |
| Gem | 0.000005  | 13 | 1.402 | 0.589 | 0.589 |
| Gem | 0.000005  | 14 | 1.459 | 0.608 | 0.608 |
| Gem | 0.000005  | 15 | 1.343 | 0.589 | 0.589 |
| Gem | 0.000005  | 16 | 1.348 | 0.578 | 0.578 |
| Gem | 0.000005  | 17 | 1.492 | 0.604 | 0.604 |
| Gem | 0.000005  | 18 | 1.418 | 0.615 | 0.615 |
| Gem | 0.000005  | 19 | 1.427 | 0.607 | 0.607 |
| Gem | 0.000005  | 20 | 1.418 | 0.598 | 0.598 |
| Gem | 0.000005  | 21 | 1.354 | 0.601 | 0.601 |
| Gem | 0.000005  | 22 | 1.31  | 0.574 | 0.574 |
| Gem | 0.00001   | 1  | 1.521 | 0.619 | 0.619 |
| Gem | 0.00001   | 2  | 1.575 | 0.622 | 0.622 |
| Gem | 0.00001   | 3  | 1.673 | 0.619 | 0.673 |
| Gem | 0.00001   | 4  | 1.618 | 0.615 | 0.618 |
| Gem | 0.00001   | 5  | 1.707 | 0.615 | 0.707 |
| Gem | 0.00001   | 6  | 1.628 | 0.632 | 0.632 |

|        |         |    |       |       |       |
|--------|---------|----|-------|-------|-------|
| Gem    | 0.00001 | 7  | 1.648 | 0.624 | 0.648 |
| Gem    | 0.00001 | 8  | 1.674 | 0.623 | 0.674 |
| Gem    | 0.00001 | 9  | 1.631 | 0.629 | 0.631 |
| Gem    | 0.00001 | 10 | 1.696 | 0.626 | 0.696 |
| Gem    | 0.00001 | 11 | 1.625 | 0.621 | 0.625 |
| Gem    | 0.00001 | 12 | 1.657 | 0.625 | 0.657 |
| Gem    | 0.00001 | 13 | 1.641 | 0.626 | 0.641 |
| Gem    | 0.00001 | 14 | 1.659 | 0.623 | 0.659 |
| Gem    | 0.00001 | 15 | 1.595 | 0.604 | 0.604 |
| Gem    | 0.00001 | 16 | 1.545 | 0.601 | 0.601 |
| Gem    | 0.00001 | 17 | 1.652 | 0.606 | 0.652 |
| Gem    | 0.00001 | 18 | 1.619 | 0.63  | 0.63  |
| Gem    | 0.00001 | 19 | 1.681 | 0.604 | 0.681 |
| Gem    | 0.00001 | 20 | 1.653 | 0.616 | 0.653 |
| Gem    | 0.00001 | 21 | 1.61  | 0.615 | 0.615 |
| Gem    | 0.00001 | 22 | 1.547 | 0.604 | 0.604 |
| Gem    | 0.00002 | 1  | 1.456 | 0.611 | 0.611 |
| Gem    | 0.00002 | 2  | 1.638 | 0.618 | 0.638 |
| Gem    | 0.00002 | 3  | 1.711 | 0.621 | 0.711 |
| Gem    | 0.00002 | 4  | 1.577 | 0.615 | 0.615 |
| Gem    | 0.00002 | 5  | 1.677 | 0.612 | 0.677 |
| Gem    | 0.00002 | 6  | 1.683 | 0.628 | 0.683 |
| Gem    | 0.00002 | 7  | 1.663 | 0.624 | 0.663 |
| Gem    | 0.00002 | 8  | 1.585 | 0.613 | 0.613 |
| Gem    | 0.00002 | 9  | 1.664 | 0.62  | 0.664 |
| Gem    | 0.00002 | 10 | 1.725 | 0.625 | 0.725 |
| Gem    | 0.00002 | 11 | 1.617 | 0.61  | 0.617 |
| Gem    | 0.00002 | 12 | 1.638 | 0.619 | 0.638 |
| Gem    | 0.00002 | 13 | 1.633 | 0.626 | 0.633 |
| Gem    | 0.00002 | 14 | 1.61  | 0.614 | 0.614 |
| Gem    | 0.00002 | 15 | 1.621 | 0.616 | 0.621 |
| Gem    | 0.00002 | 16 | 1.472 | 0.587 | 0.587 |
| Gem    | 0.00002 | 17 | 1.593 | 0.601 | 0.601 |
| Gem    | 0.00002 | 18 | 1.643 | 0.625 | 0.643 |
| Gem    | 0.00002 | 19 | 1.742 | 0.606 | 0.742 |
| Gem    | 0.00002 | 20 | 1.601 | 0.606 | 0.606 |
| Gem    | 0.00002 | 21 | 1.614 | 0.613 | 0.614 |
| Gem    | 0.00002 | 22 | 1.558 | 0.598 | 0.598 |
| Hydrox | 0.0375  | 1  | 1.414 | 0.604 | 0.604 |
| Hydrox | 0.0375  | 2  | 1.454 | 0.615 | 0.615 |
| Hydrox | 0.0375  | 3  | 1.54  | 0.631 | 0.631 |
| Hydrox | 0.0375  | 4  | 1.516 | 0.617 | 0.617 |
| Hydrox | 0.0375  | 5  | 1.646 | 0.621 | 0.646 |
| Hydrox | 0.0375  | 6  | 1.494 | 0.627 | 0.627 |
| Hydrox | 0.0375  | 7  | 1.497 | 0.619 | 0.619 |
| Hydrox | 0.0375  | 8  | 1.504 | 0.613 | 0.613 |
| Hydrox | 0.0375  | 9  | 1.486 | 0.625 | 0.625 |
| Hydrox | 0.0375  | 10 | 1.58  | 0.631 | 0.631 |
| Hydrox | 0.0375  | 11 | 1.487 | 0.618 | 0.618 |

|        |        |    |       |       |       |
|--------|--------|----|-------|-------|-------|
| Hydrox | 0.0375 | 12 | 1.496 | 0.611 | 0.611 |
| Hydrox | 0.0375 | 13 | 1.443 | 0.61  | 0.61  |
| Hydrox | 0.0375 | 14 | 1.567 | 0.623 | 0.623 |
| Hydrox | 0.0375 | 15 | 1.493 | 0.621 | 0.621 |
| Hydrox | 0.0375 | 16 | 1.445 | 0.599 | 0.599 |
| Hydrox | 0.0375 | 17 | 1.606 | 0.609 | 0.609 |
| Hydrox | 0.0375 | 18 | 1.512 | 0.616 | 0.616 |
| Hydrox | 0.0375 | 19 | 1.522 | 0.614 | 0.614 |
| Hydrox | 0.0375 | 20 | 1.575 | 0.62  | 0.62  |
| Hydrox | 0.0375 | 21 | 1.471 | 0.611 | 0.611 |
| Hydrox | 0.0375 | 22 | 1.452 | 0.595 | 0.595 |
| Hydrox | 0.075  | 1  | 1.369 | 0.593 | 0.593 |
| Hydrox | 0.075  | 2  | 1.434 | 0.604 | 0.604 |
| Hydrox | 0.075  | 3  | 1.477 | 0.609 | 0.609 |
| Hydrox | 0.075  | 4  | 1.472 | 0.606 | 0.606 |
| Hydrox | 0.075  | 5  | 1.566 | 0.603 | 0.603 |
| Hydrox | 0.075  | 6  | 1.484 | 0.615 | 0.615 |
| Hydrox | 0.075  | 7  | 1.421 | 0.602 | 0.602 |
| Hydrox | 0.075  | 8  | 1.468 | 0.609 | 0.609 |
| Hydrox | 0.075  | 9  | 1.442 | 0.6   | 0.6   |
| Hydrox | 0.075  | 10 | 1.525 | 0.626 | 0.626 |
| Hydrox | 0.075  | 11 | 1.448 | 0.615 | 0.615 |
| Hydrox | 0.075  | 12 | 1.486 | 0.614 | 0.614 |
| Hydrox | 0.075  | 13 | 1.426 | 0.588 | 0.588 |
| Hydrox | 0.075  | 14 | 1.513 | 0.613 | 0.613 |
| Hydrox | 0.075  | 15 | 1.427 | 0.607 | 0.607 |
| Hydrox | 0.075  | 16 | 1.42  | 0.59  | 0.59  |
| Hydrox | 0.075  | 17 | 1.509 | 0.599 | 0.599 |
| Hydrox | 0.075  | 18 | 1.482 | 0.609 | 0.609 |
| Hydrox | 0.075  | 19 | 1.51  | 0.613 | 0.613 |
| Hydrox | 0.075  | 20 | 1.517 | 0.609 | 0.609 |
| Hydrox | 0.075  | 21 | 1.506 | 0.593 | 0.593 |
| Hydrox | 0.075  | 22 | 1.343 | 0.582 | 0.582 |
| Hydrox | 0.15   | 1  | 1.453 | 0.609 | 0.609 |
| Hydrox | 0.15   | 2  | 1.538 | 0.614 | 0.614 |
| Hydrox | 0.15   | 3  | 1.608 | 0.614 | 0.614 |
| Hydrox | 0.15   | 4  | 1.553 | 0.625 | 0.625 |
| Hydrox | 0.15   | 5  | 1.664 | 0.62  | 0.664 |
| Hydrox | 0.15   | 6  | 1.525 | 0.61  | 0.61  |
| Hydrox | 0.15   | 7  | 1.552 | 0.615 | 0.615 |
| Hydrox | 0.15   | 8  | 1.575 | 0.606 | 0.606 |
| Hydrox | 0.15   | 9  | 1.563 | 0.617 | 0.617 |
| Hydrox | 0.15   | 10 | 1.586 | 0.623 | 0.623 |
| Hydrox | 0.15   | 11 | 1.544 | 0.624 | 0.624 |
| Hydrox | 0.15   | 12 | 1.589 | 0.624 | 0.624 |
| Hydrox | 0.15   | 13 | 1.537 | 0.596 | 0.596 |
| Hydrox | 0.15   | 14 | 1.579 | 0.615 | 0.615 |
| Hydrox | 0.15   | 15 | 1.524 | 0.611 | 0.611 |
| Hydrox | 0.15   | 16 | 1.545 | 0.601 | 0.601 |

|        |          |    |       |       |       |
|--------|----------|----|-------|-------|-------|
| Hydrox | 0.15     | 17 | 1.591 | 0.6   | 0.6   |
| Hydrox | 0.15     | 18 | 1.6   | 0.613 | 0.613 |
| Hydrox | 0.15     | 19 | 1.628 | 0.624 | 0.628 |
| Hydrox | 0.15     | 20 | 1.6   | 0.604 | 0.604 |
| Hydrox | 0.15     | 21 | 1.562 | 0.618 | 0.618 |
| Hydrox | 0.15     | 22 | 1.485 | 0.596 | 0.596 |
| Hydrox | 0.3      | 1  | 1.298 | 0.588 | 0.588 |
| Hydrox | 0.3      | 2  | 1.358 | 0.599 | 0.599 |
| Hydrox | 0.3      | 3  | 1.446 | 0.615 | 0.615 |
| Hydrox | 0.3      | 4  | 1.424 | 0.616 | 0.616 |
| Hydrox | 0.3      | 5  | 1.518 | 0.618 | 0.618 |
| Hydrox | 0.3      | 6  | 1.364 | 0.592 | 0.592 |
| Hydrox | 0.3      | 7  | 1.394 | 0.605 | 0.605 |
| Hydrox | 0.3      | 8  | 1.422 | 0.604 | 0.604 |
| Hydrox | 0.3      | 9  | 1.383 | 0.602 | 0.602 |
| Hydrox | 0.3      | 10 | 1.46  | 0.616 | 0.616 |
| Hydrox | 0.3      | 11 | 1.394 | 0.611 | 0.611 |
| Hydrox | 0.3      | 12 | 1.437 | 0.62  | 0.62  |
| Hydrox | 0.3      | 13 | 1.376 | 0.593 | 0.593 |
| Hydrox | 0.3      | 14 | 1.443 | 0.609 | 0.609 |
| Hydrox | 0.3      | 15 | 1.386 | 0.6   | 0.6   |
| Hydrox | 0.3      | 16 | 1.37  | 0.575 | 0.575 |
| Hydrox | 0.3      | 17 | 1.452 | 0.606 | 0.606 |
| Hydrox | 0.3      | 18 | 1.418 | 0.613 | 0.613 |
| Hydrox | 0.3      | 19 | 1.455 | 0.618 | 0.618 |
| Hydrox | 0.3      | 20 | 1.447 | 0.626 | 0.626 |
| Hydrox | 0.3      | 21 | 1.401 | 0.617 | 0.617 |
| Hydrox | 0.3      | 22 | 1.335 | 0.577 | 0.577 |
| Ida    | 0.000005 | 1  | 1.254 | 0.563 | 0.563 |
| Ida    | 0.000005 | 2  | 1.292 | 0.57  | 0.57  |
| Ida    | 0.000005 | 3  | 1.355 | 0.593 | 0.593 |
| Ida    | 0.000005 | 4  | 1.323 | 0.577 | 0.577 |
| Ida    | 0.000005 | 5  | 1.43  | 0.605 | 0.605 |
| Ida    | 0.000005 | 6  | 1.345 | 0.592 | 0.592 |
| Ida    | 0.000005 | 7  | 1.295 | 0.584 | 0.584 |
| Ida    | 0.000005 | 8  | 1.331 | 0.595 | 0.595 |
| Ida    | 0.000005 | 9  | 1.298 | 0.575 | 0.575 |
| Ida    | 0.000005 | 10 | 1.365 | 0.592 | 0.592 |
| Ida    | 0.000005 | 11 | 1.312 | 0.581 | 0.581 |
| Ida    | 0.000005 | 12 | 1.336 | 0.592 | 0.592 |
| Ida    | 0.000005 | 13 | 1.295 | 0.583 | 0.583 |
| Ida    | 0.000005 | 14 | 1.386 | 0.587 | 0.587 |
| Ida    | 0.000005 | 15 | 1.26  | 0.57  | 0.57  |
| Ida    | 0.000005 | 16 | 1.26  | 0.56  | 0.56  |
| Ida    | 0.000005 | 17 | 1.406 | 0.595 | 0.595 |
| Ida    | 0.000005 | 18 | 1.317 | 0.588 | 0.588 |
| Ida    | 0.000005 | 19 | 1.349 | 0.585 | 0.585 |
| Ida    | 0.000005 | 20 | 1.392 | 0.595 | 0.595 |
| Ida    | 0.000005 | 21 | 1.295 | 0.576 | 0.576 |

|     |           |    |       |       |       |
|-----|-----------|----|-------|-------|-------|
| Ida | 0.000005  | 22 | 1.231 | 0.574 | 0.574 |
| Ida | 0.0000123 | 1  | 1.521 | 0.62  | 0.62  |
| Ida | 0.0000123 | 2  | 1.568 | 0.622 | 0.622 |
| Ida | 0.0000123 | 3  | 1.632 | 0.62  | 0.632 |
| Ida | 0.0000123 | 4  | 1.575 | 0.607 | 0.607 |
| Ida | 0.0000123 | 5  | 1.713 | 0.616 | 0.713 |
| Ida | 0.0000123 | 6  | 1.585 | 0.614 | 0.614 |
| Ida | 0.0000123 | 7  | 1.594 | 0.62  | 0.62  |
| Ida | 0.0000123 | 8  | 1.64  | 0.614 | 0.64  |
| Ida | 0.0000123 | 9  | 1.601 | 0.619 | 0.619 |
| Ida | 0.0000123 | 10 | 1.62  | 0.618 | 0.62  |
| Ida | 0.0000123 | 11 | 1.61  | 0.626 | 0.626 |
| Ida | 0.0000123 | 12 | 1.615 | 0.618 | 0.618 |
| Ida | 0.0000123 | 13 | 1.562 | 0.604 | 0.604 |
| Ida | 0.0000123 | 14 | 1.641 | 0.606 | 0.641 |
| Ida | 0.0000123 | 15 | 1.532 | 0.607 | 0.607 |
| Ida | 0.0000123 | 16 | 1.581 | 0.616 | 0.616 |
| Ida | 0.0000123 | 17 | 1.616 | 0.603 | 0.616 |
| Ida | 0.0000123 | 18 | 1.639 | 0.615 | 0.639 |
| Ida | 0.0000123 | 19 | 1.614 | 0.617 | 0.617 |
| Ida | 0.0000123 | 20 | 1.658 | 0.62  | 0.658 |
| Ida | 0.0000123 | 21 | 1.569 | 0.628 | 0.628 |
| Ida | 0.0000123 | 22 | 1.498 | 0.605 | 0.605 |
| Ida | 0.0000278 | 1  | 1.474 | 0.617 | 0.617 |
| Ida | 0.0000278 | 2  | 1.546 | 0.614 | 0.614 |
| Ida | 0.0000278 | 3  | 1.602 | 0.62  | 0.62  |
| Ida | 0.0000278 | 4  | 1.584 | 0.617 | 0.617 |
| Ida | 0.0000278 | 5  | 1.706 | 0.628 | 0.706 |
| Ida | 0.0000278 | 6  | 1.577 | 0.621 | 0.621 |
| Ida | 0.0000278 | 7  | 1.571 | 0.628 | 0.628 |
| Ida | 0.0000278 | 8  | 1.574 | 0.601 | 0.601 |
| Ida | 0.0000278 | 9  | 1.545 | 0.619 | 0.619 |
| Ida | 0.0000278 | 10 | 1.612 | 0.622 | 0.622 |
| Ida | 0.0000278 | 11 | 1.58  | 0.626 | 0.626 |
| Ida | 0.0000278 | 12 | 1.606 | 0.629 | 0.629 |
| Ida | 0.0000278 | 13 | 1.545 | 0.612 | 0.612 |
| Ida | 0.0000278 | 14 | 1.592 | 0.616 | 0.616 |
| Ida | 0.0000278 | 15 | 1.542 | 0.618 | 0.618 |
| Ida | 0.0000278 | 16 | 1.517 | 0.599 | 0.599 |
| Ida | 0.0000278 | 17 | 1.64  | 0.609 | 0.64  |
| Ida | 0.0000278 | 18 | 1.601 | 0.614 | 0.614 |
| Ida | 0.0000278 | 19 | 1.619 | 0.628 | 0.628 |
| Ida | 0.0000278 | 20 | 1.589 | 0.624 | 0.624 |
| Ida | 0.0000278 | 21 | 1.525 | 0.624 | 0.624 |
| Ida | 0.0000278 | 22 | 1.517 | 0.618 | 0.618 |
| Ida | 0.0000625 | 1  | 1.146 | 0.532 | 0.532 |
| Ida | 0.0000625 | 2  | 1.199 | 0.542 | 0.542 |
| Ida | 0.0000625 | 3  | 1.243 | 0.567 | 0.567 |
| Ida | 0.0000625 | 4  | 1.258 | 0.564 | 0.564 |



|       |           |    |       |       |       |
|-------|-----------|----|-------|-------|-------|
| Ida   | 0.0000625 | 5  | 1.362 | 0.59  | 0.59  |
| Ida   | 0.0000625 | 6  | 1.203 | 0.55  | 0.55  |
| Ida   | 0.0000625 | 7  | 1.219 | 0.56  | 0.56  |
| Ida   | 0.0000625 | 8  | 1.237 | 0.556 | 0.556 |
| Ida   | 0.0000625 | 9  | 1.201 | 0.551 | 0.551 |
| Ida   | 0.0000625 | 10 | 1.265 | 0.565 | 0.565 |
| Ida   | 0.0000625 | 11 | 1.238 | 0.557 | 0.557 |
| Ida   | 0.0000625 | 12 | 1.238 | 0.57  | 0.57  |
| Ida   | 0.0000625 | 13 | 1.209 | 0.543 | 0.543 |
| Ida   | 0.0000625 | 14 | 1.288 | 0.57  | 0.57  |
| Ida   | 0.0000625 | 15 | 1.204 | 0.543 | 0.543 |
| Ida   | 0.0000625 | 16 | 1.205 | 0.534 | 0.534 |
| Ida   | 0.0000625 | 17 | 1.29  | 0.575 | 0.575 |
| Ida   | 0.0000625 | 18 | 1.243 | 0.558 | 0.558 |
| Ida   | 0.0000625 | 19 | 1.278 | 0.576 | 0.576 |
| Ida   | 0.0000625 | 20 | 1.252 | 0.567 | 0.567 |
| Ida   | 0.0000625 | 21 | 1.202 | 0.544 | 0.544 |
| Ida   | 0.0000625 | 22 | 1.174 | 0.53  | 0.53  |
| Mitom | 0.0000111 | 1  | 1.299 | 0.59  | 0.59  |
| Mitom | 0.0000111 | 2  | 1.372 | 0.596 | 0.596 |
| Mitom | 0.0000111 | 3  | 1.419 | 0.622 | 0.622 |
| Mitom | 0.0000111 | 4  | 1.384 | 0.601 | 0.601 |
| Mitom | 0.0000111 | 5  | 1.503 | 0.614 | 0.614 |
| Mitom | 0.0000111 | 6  | 1.375 | 0.605 | 0.605 |
| Mitom | 0.0000111 | 7  | 1.391 | 0.603 | 0.603 |
| Mitom | 0.0000111 | 8  | 1.423 | 0.611 | 0.611 |
| Mitom | 0.0000111 | 9  | 1.346 | 0.593 | 0.593 |
| Mitom | 0.0000111 | 10 | 1.44  | 0.619 | 0.619 |
| Mitom | 0.0000111 | 11 | 1.391 | 0.613 | 0.613 |
| Mitom | 0.0000111 | 12 | 1.403 | 0.611 | 0.611 |
| Mitom | 0.0000111 | 13 | 1.397 | 0.602 | 0.602 |
| Mitom | 0.0000111 | 14 | 1.436 | 0.614 | 0.614 |
| Mitom | 0.0000111 | 15 | 1.329 | 0.602 | 0.602 |
| Mitom | 0.0000111 | 16 | 1.338 | 0.578 | 0.578 |
| Mitom | 0.0000111 | 17 | 1.451 | 0.606 | 0.606 |
| Mitom | 0.0000111 | 18 | 1.425 | 0.611 | 0.611 |
| Mitom | 0.0000111 | 19 | 1.444 | 0.618 | 0.618 |
| Mitom | 0.0000111 | 20 | 1.398 | 0.611 | 0.611 |
| Mitom | 0.0000111 | 21 | 1.352 | 0.602 | 0.602 |
| Mitom | 0.0000111 | 22 | 1.282 | 0.569 | 0.569 |
| Mitom | 0.0000333 | 1  | 1.441 | 0.622 | 0.622 |
| Mitom | 0.0000333 | 2  | 1.516 | 0.615 | 0.615 |
| Mitom | 0.0000333 | 3  | 1.58  | 0.614 | 0.614 |
| Mitom | 0.0000333 | 4  | 1.529 | 0.616 | 0.616 |
| Mitom | 0.0000333 | 5  | 1.637 | 0.619 | 0.637 |
| Mitom | 0.0000333 | 6  | 1.547 | 0.617 | 0.617 |
| Mitom | 0.0000333 | 7  | 1.554 | 0.63  | 0.63  |
| Mitom | 0.0000333 | 8  | 1.558 | 0.613 | 0.613 |
| Mitom | 0.0000333 | 9  | 1.531 | 0.608 | 0.608 |

|       |           |    |       |       |       |
|-------|-----------|----|-------|-------|-------|
| Mitom | 0.0000333 | 10 | 1.576 | 0.62  | 0.62  |
| Mitom | 0.0000333 | 11 | 1.531 | 0.624 | 0.624 |
| Mitom | 0.0000333 | 12 | 1.582 | 0.617 | 0.617 |
| Mitom | 0.0000333 | 13 | 1.505 | 0.615 | 0.615 |
| Mitom | 0.0000333 | 14 | 1.578 | 0.627 | 0.627 |
| Mitom | 0.0000333 | 15 | 1.506 | 0.626 | 0.626 |
| Mitom | 0.0000333 | 16 | 1.483 | 0.601 | 0.601 |
| Mitom | 0.0000333 | 17 | 1.609 | 0.617 | 0.617 |
| Mitom | 0.0000333 | 18 | 1.595 | 0.619 | 0.619 |
| Mitom | 0.0000333 | 19 | 1.611 | 0.634 | 0.634 |
| Mitom | 0.0000333 | 20 | 1.631 | 0.632 | 0.632 |
| Mitom | 0.0000333 | 21 | 1.522 | 0.605 | 0.605 |
| Mitom | 0.0000333 | 22 | 1.477 | 0.621 | 0.621 |
| Mitom | 0.0001    | 1  | 1.41  | 0.61  | 0.61  |
| Mitom | 0.0001    | 2  | 1.455 | 0.601 | 0.601 |
| Mitom | 0.0001    | 3  | 1.541 | 0.622 | 0.622 |
| Mitom | 0.0001    | 4  | 1.469 | 0.605 | 0.605 |
| Mitom | 0.0001    | 5  | 1.605 | 0.615 | 0.615 |
| Mitom | 0.0001    | 6  | 1.495 | 0.608 | 0.608 |
| Mitom | 0.0001    | 7  | 1.488 | 0.617 | 0.617 |
| Mitom | 0.0001    | 8  | 1.52  | 0.612 | 0.612 |
| Mitom | 0.0001    | 9  | 1.45  | 0.612 | 0.612 |
| Mitom | 0.0001    | 10 | 1.549 | 0.615 | 0.615 |
| Mitom | 0.0001    | 11 | 1.467 | 0.609 | 0.609 |
| Mitom | 0.0001    | 12 | 1.51  | 0.624 | 0.624 |
| Mitom | 0.0001    | 13 | 1.462 | 0.613 | 0.613 |
| Mitom | 0.0001    | 14 | 1.553 | 0.62  | 0.62  |
| Mitom | 0.0001    | 15 | 1.479 | 0.611 | 0.611 |
| Mitom | 0.0001    | 16 | 1.444 | 0.601 | 0.601 |
| Mitom | 0.0001    | 17 | 1.587 | 0.611 | 0.611 |
| Mitom | 0.0001    | 18 | 1.536 | 0.614 | 0.614 |
| Mitom | 0.0001    | 19 | 1.481 | 0.613 | 0.613 |
| Mitom | 0.0001    | 20 | 1.586 | 0.625 | 0.625 |
| Mitom | 0.0001    | 21 | 1.448 | 0.611 | 0.611 |
| Mitom | 0.0001    | 22 | 1.41  | 0.59  | 0.59  |
| Mitom | 0.0003    | 1  | 1.336 | 0.585 | 0.585 |
| Mitom | 0.0003    | 2  | 1.36  | 0.589 | 0.589 |
| Mitom | 0.0003    | 3  | 1.625 | 0.624 | 0.625 |
| Mitom | 0.0003    | 4  | 1.408 | 0.596 | 0.596 |
| Mitom | 0.0003    | 5  | 1.536 | 0.612 | 0.612 |
| Mitom | 0.0003    | 6  | 1.534 | 0.62  | 0.62  |
| Mitom | 0.0003    | 7  | 1.568 | 0.619 | 0.619 |
| Mitom | 0.0003    | 8  | 1.455 | 0.6   | 0.6   |
| Mitom | 0.0003    | 9  | 1.525 | 0.617 | 0.617 |
| Mitom | 0.0003    | 10 | 1.597 | 0.615 | 0.615 |
| Mitom | 0.0003    | 11 | 1.542 | 0.606 | 0.606 |
| Mitom | 0.0003    | 12 | 1.611 | 0.627 | 0.627 |
| Mitom | 0.0003    | 13 | 1.568 | 0.633 | 0.633 |
| Mitom | 0.0003    | 14 | 1.602 | 0.614 | 0.614 |

|       |           |    |       |       |       |
|-------|-----------|----|-------|-------|-------|
| Mitom | 0.0003    | 15 | 1.512 | 0.61  | 0.61  |
| Mitom | 0.0003    | 16 | 1.556 | 0.608 | 0.608 |
| Mitom | 0.0003    | 17 | 1.495 | 0.592 | 0.592 |
| Mitom | 0.0003    | 18 | 1.577 | 0.616 | 0.616 |
| Mitom | 0.0003    | 19 | 1.601 | 0.635 | 0.635 |
| Mitom | 0.0003    | 20 | 1.605 | 0.621 | 0.621 |
| Mitom | 0.0003    | 21 | 1.532 | 0.608 | 0.608 |
| Mitom | 0.0003    | 22 | 1.427 | 0.605 | 0.605 |
| Mitox | 0.0000037 | 1  | 1.444 | 0.615 | 0.615 |
| Mitox | 0.0000037 | 2  | 1.496 | 0.613 | 0.613 |
| Mitox | 0.0000037 | 3  | 1.583 | 0.633 | 0.633 |
| Mitox | 0.0000037 | 4  | 1.546 | 0.623 | 0.623 |
| Mitox | 0.0000037 | 5  | 1.634 | 0.623 | 0.634 |
| Mitox | 0.0000037 | 6  | 1.55  | 0.63  | 0.63  |
| Mitox | 0.0000037 | 7  | 1.533 | 0.627 | 0.627 |
| Mitox | 0.0000037 | 8  | 1.514 | 0.609 | 0.609 |
| Mitox | 0.0000037 | 9  | 1.503 | 0.622 | 0.622 |
| Mitox | 0.0000037 | 10 | 1.602 | 0.623 | 0.623 |
| Mitox | 0.0000037 | 11 | 1.51  | 0.62  | 0.62  |
| Mitox | 0.0000037 | 12 | 1.562 | 0.631 | 0.631 |
| Mitox | 0.0000037 | 13 | 1.479 | 0.609 | 0.609 |
| Mitox | 0.0000037 | 14 | 1.607 | 0.612 | 0.612 |
| Mitox | 0.0000037 | 15 | 1.504 | 0.624 | 0.624 |
| Mitox | 0.0000037 | 16 | 1.479 | 0.598 | 0.598 |
| Mitox | 0.0000037 | 17 | 1.613 | 0.615 | 0.615 |
| Mitox | 0.0000037 | 18 | 1.571 | 0.617 | 0.617 |
| Mitox | 0.0000037 | 19 | 1.557 | 0.606 | 0.606 |
| Mitox | 0.0000037 | 20 | 1.606 | 0.636 | 0.636 |
| Mitox | 0.0000037 | 21 | 1.493 | 0.607 | 0.607 |
| Mitox | 0.0000037 | 22 | 1.452 | 0.609 | 0.609 |
| Mitox | 0.0000111 | 1  | 1.418 | 0.598 | 0.598 |
| Mitox | 0.0000111 | 2  | 1.471 | 0.606 | 0.606 |
| Mitox | 0.0000111 | 3  | 1.532 | 0.618 | 0.618 |
| Mitox | 0.0000111 | 4  | 1.463 | 0.609 | 0.609 |
| Mitox | 0.0000111 | 5  | 1.611 | 0.615 | 0.615 |
| Mitox | 0.0000111 | 6  | 1.441 | 0.603 | 0.603 |
| Mitox | 0.0000111 | 7  | 1.475 | 0.615 | 0.615 |
| Mitox | 0.0000111 | 8  | 1.508 | 0.607 | 0.607 |
| Mitox | 0.0000111 | 9  | 1.466 | 0.597 | 0.597 |
| Mitox | 0.0000111 | 10 | 1.542 | 0.621 | 0.621 |
| Mitox | 0.0000111 | 11 | 1.489 | 0.622 | 0.622 |
| Mitox | 0.0000111 | 12 | 1.502 | 0.609 | 0.609 |
| Mitox | 0.0000111 | 13 | 1.508 | 0.597 | 0.597 |
| Mitox | 0.0000111 | 14 | 1.552 | 0.623 | 0.623 |
| Mitox | 0.0000111 | 15 | 1.421 | 0.606 | 0.606 |
| Mitox | 0.0000111 | 16 | 1.481 | 0.605 | 0.605 |
| Mitox | 0.0000111 | 17 | 1.558 | 0.604 | 0.604 |
| Mitox | 0.0000111 | 18 | 1.514 | 0.617 | 0.617 |
| Mitox | 0.0000111 | 19 | 1.508 | 0.605 | 0.605 |

|       |           |    |       |       |       |
|-------|-----------|----|-------|-------|-------|
| Mitox | 0.0000111 | 20 | 1.546 | 0.62  | 0.62  |
| Mitox | 0.0000111 | 21 | 1.48  | 0.609 | 0.609 |
| Mitox | 0.0000111 | 22 | 1.406 | 0.595 | 0.595 |
| Mitox | 0.0000333 | 1  | 1.501 | 0.611 | 0.611 |
| Mitox | 0.0000333 | 2  | 1.569 | 0.616 | 0.616 |
| Mitox | 0.0000333 | 3  | 1.647 | 0.62  | 0.647 |
| Mitox | 0.0000333 | 4  | 1.609 | 0.611 | 0.611 |
| Mitox | 0.0000333 | 5  | 1.708 | 0.616 | 0.708 |
| Mitox | 0.0000333 | 6  | 1.602 | 0.62  | 0.62  |
| Mitox | 0.0000333 | 7  | 1.609 | 0.621 | 0.621 |
| Mitox | 0.0000333 | 8  | 1.598 | 0.609 | 0.609 |
| Mitox | 0.0000333 | 9  | 1.602 | 0.611 | 0.611 |
| Mitox | 0.0000333 | 10 | 1.671 | 0.628 | 0.671 |
| Mitox | 0.0000333 | 11 | 1.606 | 0.625 | 0.625 |
| Mitox | 0.0000333 | 12 | 1.627 | 0.617 | 0.627 |
| Mitox | 0.0000333 | 13 | 1.598 | 0.616 | 0.616 |
| Mitox | 0.0000333 | 14 | 1.651 | 0.612 | 0.651 |
| Mitox | 0.0000333 | 15 | 1.568 | 0.622 | 0.622 |
| Mitox | 0.0000333 | 16 | 1.539 | 0.604 | 0.604 |
| Mitox | 0.0000333 | 17 | 1.675 | 0.618 | 0.675 |
| Mitox | 0.0000333 | 18 | 1.579 | 0.615 | 0.615 |
| Mitox | 0.0000333 | 19 | 1.661 | 0.622 | 0.661 |
| Mitox | 0.0000333 | 20 | 1.659 | 0.629 | 0.659 |
| Mitox | 0.0000333 | 21 | 1.594 | 0.615 | 0.615 |
| Mitox | 0.0000333 | 22 | 1.529 | 0.61  | 0.61  |
| Mitox | 0.0001    | 1  | 1.356 | 0.586 | 0.586 |
| Mitox | 0.0001    | 2  | 1.406 | 0.604 | 0.604 |
| Mitox | 0.0001    | 3  | 1.474 | 0.606 | 0.606 |
| Mitox | 0.0001    | 4  | 1.441 | 0.608 | 0.608 |
| Mitox | 0.0001    | 5  | 1.551 | 0.608 | 0.608 |
| Mitox | 0.0001    | 6  | 1.428 | 0.602 | 0.602 |
| Mitox | 0.0001    | 7  | 1.448 | 0.609 | 0.609 |
| Mitox | 0.0001    | 8  | 1.445 | 0.605 | 0.605 |
| Mitox | 0.0001    | 9  | 1.395 | 0.598 | 0.598 |
| Mitox | 0.0001    | 10 | 1.481 | 0.6   | 0.6   |
| Mitox | 0.0001    | 11 | 1.433 | 0.61  | 0.61  |
| Mitox | 0.0001    | 12 | 1.508 | 0.618 | 0.618 |
| Mitox | 0.0001    | 13 | 1.427 | 0.601 | 0.601 |
| Mitox | 0.0001    | 14 | 1.511 | 0.611 | 0.611 |
| Mitox | 0.0001    | 15 | 1.41  | 0.601 | 0.601 |
| Mitox | 0.0001    | 16 | 1.398 | 0.58  | 0.58  |
| Mitox | 0.0001    | 17 | 1.513 | 0.596 | 0.596 |
| Mitox | 0.0001    | 18 | 1.492 | 0.599 | 0.599 |
| Mitox | 0.0001    | 19 | 1.5   | 0.614 | 0.614 |
| Mitox | 0.0001    | 20 | 1.471 | 0.621 | 0.621 |
| Mitox | 0.0001    | 21 | 1.441 | 0.593 | 0.593 |
| Mitox | 0.0001    | 22 | 1.356 | 0.597 | 0.597 |
| Oxal  | 0.0037037 | 1  | 1.07  | 0.523 | 0.523 |
| Oxal  | 0.0037037 | 2  | 1.125 | 0.536 | 0.536 |

|      |           |    |       |       |       |
|------|-----------|----|-------|-------|-------|
| Oxal | 0.0037037 | 3  | 1.185 | 0.57  | 0.57  |
| Oxal | 0.0037037 | 4  | 1.172 | 0.557 | 0.557 |
| Oxal | 0.0037037 | 5  | 1.274 | 0.583 | 0.583 |
| Oxal | 0.0037037 | 6  | 1.148 | 0.555 | 0.555 |
| Oxal | 0.0037037 | 7  | 1.136 | 0.548 | 0.548 |
| Oxal | 0.0037037 | 8  | 1.183 | 0.561 | 0.561 |
| Oxal | 0.0037037 | 9  | 1.152 | 0.537 | 0.537 |
| Oxal | 0.0037037 | 10 | 1.2   | 0.558 | 0.558 |
| Oxal | 0.0037037 | 11 | 1.135 | 0.544 | 0.544 |
| Oxal | 0.0037037 | 12 | 1.181 | 0.555 | 0.555 |
| Oxal | 0.0037037 | 13 | 1.128 | 0.543 | 0.543 |
| Oxal | 0.0037037 | 14 | 1.231 | 0.574 | 0.574 |
| Oxal | 0.0037037 | 15 | 1.136 | 0.537 | 0.537 |
| Oxal | 0.0037037 | 16 | 1.148 | 0.531 | 0.531 |
| Oxal | 0.0037037 | 17 | 1.251 | 0.567 | 0.567 |
| Oxal | 0.0037037 | 18 | 1.177 | 0.563 | 0.563 |
| Oxal | 0.0037037 | 19 | 1.21  | 0.568 | 0.568 |
| Oxal | 0.0037037 | 20 | 1.217 | 0.561 | 0.561 |
| Oxal | 0.0037037 | 21 | 1.149 | 0.539 | 0.539 |
| Oxal | 0.0037037 | 22 | 1.076 | 0.513 | 0.513 |
| Oxal | 0.0111111 | 1  | 1.227 | 0.57  | 0.57  |
| Oxal | 0.0111111 | 2  | 1.29  | 0.579 | 0.579 |
| Oxal | 0.0111111 | 3  | 1.366 | 0.602 | 0.602 |
| Oxal | 0.0111111 | 4  | 1.328 | 0.582 | 0.582 |
| Oxal | 0.0111111 | 5  | 1.435 | 0.613 | 0.613 |
| Oxal | 0.0111111 | 6  | 1.344 | 0.592 | 0.592 |
| Oxal | 0.0111111 | 7  | 1.303 | 0.585 | 0.585 |
| Oxal | 0.0111111 | 8  | 1.367 | 0.594 | 0.594 |
| Oxal | 0.0111111 | 9  | 1.304 | 0.583 | 0.583 |
| Oxal | 0.0111111 | 10 | 1.387 | 0.609 | 0.609 |
| Oxal | 0.0111111 | 11 | 1.323 | 0.589 | 0.589 |
| Oxal | 0.0111111 | 12 | 1.323 | 0.585 | 0.585 |
| Oxal | 0.0111111 | 13 | 1.315 | 0.583 | 0.583 |
| Oxal | 0.0111111 | 14 | 1.372 | 0.598 | 0.598 |
| Oxal | 0.0111111 | 15 | 1.346 | 0.594 | 0.594 |
| Oxal | 0.0111111 | 16 | 1.304 | 0.568 | 0.568 |
| Oxal | 0.0111111 | 17 | 1.405 | 0.592 | 0.592 |
| Oxal | 0.0111111 | 18 | 1.359 | 0.59  | 0.59  |
| Oxal | 0.0111111 | 19 | 1.364 | 0.591 | 0.591 |
| Oxal | 0.0111111 | 20 | 1.379 | 0.595 | 0.595 |
| Oxal | 0.0111111 | 21 | 1.272 | 0.581 | 0.581 |
| Oxal | 0.0111111 | 22 | 1.254 | 0.57  | 0.57  |
| Oxal | 0.0333333 | 1  | 1.525 | 0.62  | 0.62  |
| Oxal | 0.0333333 | 2  | 1.544 | 0.619 | 0.619 |
| Oxal | 0.0333333 | 3  | 1.664 | 0.619 | 0.664 |
| Oxal | 0.0333333 | 4  | 1.605 | 0.628 | 0.628 |
| Oxal | 0.0333333 | 5  | 1.691 | 0.611 | 0.691 |
| Oxal | 0.0333333 | 6  | 1.591 | 0.62  | 0.62  |
| Oxal | 0.0333333 | 7  | 1.607 | 0.63  | 0.63  |

|      |           |    |       |       |       |
|------|-----------|----|-------|-------|-------|
| Oxal | 0.0333333 | 8  | 1.575 | 0.618 | 0.618 |
| Oxal | 0.0333333 | 9  | 1.568 | 0.615 | 0.615 |
| Oxal | 0.0333333 | 10 | 1.655 | 0.626 | 0.655 |
| Oxal | 0.0333333 | 11 | 1.611 | 0.618 | 0.618 |
| Oxal | 0.0333333 | 12 | 1.603 | 0.619 | 0.619 |
| Oxal | 0.0333333 | 13 | 1.547 | 0.621 | 0.621 |
| Oxal | 0.0333333 | 14 | 1.653 | 0.624 | 0.653 |
| Oxal | 0.0333333 | 15 | 1.573 | 0.614 | 0.614 |
| Oxal | 0.0333333 | 16 | 1.552 | 0.623 | 0.623 |
| Oxal | 0.0333333 | 17 | 1.649 | 0.6   | 0.649 |
| Oxal | 0.0333333 | 18 | 1.645 | 0.61  | 0.645 |
| Oxal | 0.0333333 | 19 | 1.661 | 0.616 | 0.661 |
| Oxal | 0.0333333 | 20 | 1.622 | 0.603 | 0.622 |
| Oxal | 0.0333333 | 21 | 1.555 | 0.626 | 0.626 |
| Oxal | 0.0333333 | 22 | 1.5   | 0.605 | 0.605 |
| Oxal | 0.1       | 1  | 1.525 | 0.613 | 0.613 |
| Oxal | 0.1       | 2  | 1.557 | 0.616 | 0.616 |
| Oxal | 0.1       | 3  | 1.638 | 0.615 | 0.638 |
| Oxal | 0.1       | 4  | 1.62  | 0.63  | 0.63  |
| Oxal | 0.1       | 5  | 1.695 | 0.612 | 0.695 |
| Oxal | 0.1       | 6  | 1.627 | 0.619 | 0.627 |
| Oxal | 0.1       | 7  | 1.609 | 0.622 | 0.622 |
| Oxal | 0.1       | 8  | 1.629 | 0.613 | 0.629 |
| Oxal | 0.1       | 9  | 1.62  | 0.625 | 0.625 |
| Oxal | 0.1       | 10 | 1.669 | 0.627 | 0.669 |
| Oxal | 0.1       | 11 | 1.617 | 0.627 | 0.627 |
| Oxal | 0.1       | 12 | 1.618 | 0.62  | 0.62  |
| Oxal | 0.1       | 13 | 1.54  | 0.618 | 0.618 |
| Oxal | 0.1       | 14 | 1.653 | 0.626 | 0.653 |
| Oxal | 0.1       | 15 | 1.55  | 0.596 | 0.596 |
| Oxal | 0.1       | 16 | 1.581 | 0.623 | 0.623 |
| Oxal | 0.1       | 17 | 1.714 | 0.607 | 0.714 |
| Oxal | 0.1       | 18 | 1.592 | 0.616 | 0.616 |
| Oxal | 0.1       | 19 | 1.663 | 0.615 | 0.663 |
| Oxal | 0.1       | 20 | 1.617 | 0.613 | 0.617 |
| Oxal | 0.1       | 21 | 1.587 | 0.617 | 0.617 |
| Oxal | 0.1       | 22 | 1.511 | 0.6   | 0.6   |
| Pac  | 0.0000185 | 1  | 1.299 | 0.581 | 0.581 |
| Pac  | 0.0000185 | 2  | 1.478 | 0.607 | 0.607 |
| Pac  | 0.0000185 | 3  | 1.559 | 0.622 | 0.622 |
| Pac  | 0.0000185 | 4  | 1.395 | 0.589 | 0.589 |
| Pac  | 0.0000185 | 5  | 1.625 | 0.624 | 0.625 |
| Pac  | 0.0000185 | 6  | 1.544 | 0.62  | 0.62  |
| Pac  | 0.0000185 | 7  | 1.498 | 0.608 | 0.608 |
| Pac  | 0.0000185 | 8  | 1.497 | 0.606 | 0.606 |
| Pac  | 0.0000185 | 9  | 1.474 | 0.613 | 0.613 |
| Pac  | 0.0000185 | 10 | 1.429 | 0.605 | 0.605 |
| Pac  | 0.0000185 | 11 | 1.471 | 0.616 | 0.616 |
| Pac  | 0.0000185 | 12 | 1.463 | 0.611 | 0.611 |

|     |           |    |       |       |       |
|-----|-----------|----|-------|-------|-------|
| Pac | 0.0000185 | 13 | 1.506 | 0.611 | 0.611 |
| Pac | 0.0000185 | 14 | 1.488 | 0.61  | 0.61  |
| Pac | 0.0000185 | 15 | 1.451 | 0.624 | 0.624 |
| Pac | 0.0000185 | 16 | 1.373 | 0.584 | 0.584 |
| Pac | 0.0000185 | 17 | 1.501 | 0.602 | 0.602 |
| Pac | 0.0000185 | 18 | 1.537 | 0.615 | 0.615 |
| Pac | 0.0000185 | 19 | 1.578 | 0.636 | 0.636 |
| Pac | 0.0000185 | 20 | 1.614 | 0.63  | 0.63  |
| Pac | 0.0000185 | 21 | 1.478 | 0.622 | 0.622 |
| Pac | 0.0000185 | 22 | 1.409 | 0.601 | 0.601 |
| Pac | 0.0000556 | 1  | 1.364 | 0.593 | 0.593 |
| Pac | 0.0000556 | 2  | 1.424 | 0.604 | 0.604 |
| Pac | 0.0000556 | 3  | 1.505 | 0.617 | 0.617 |
| Pac | 0.0000556 | 4  | 1.448 | 0.598 | 0.598 |
| Pac | 0.0000556 | 5  | 1.591 | 0.625 | 0.625 |
| Pac | 0.0000556 | 6  | 1.467 | 0.61  | 0.61  |
| Pac | 0.0000556 | 7  | 1.458 | 0.614 | 0.614 |
| Pac | 0.0000556 | 8  | 1.479 | 0.604 | 0.604 |
| Pac | 0.0000556 | 9  | 1.47  | 0.606 | 0.606 |
| Pac | 0.0000556 | 10 | 1.516 | 0.617 | 0.617 |
| Pac | 0.0000556 | 11 | 1.448 | 0.608 | 0.608 |
| Pac | 0.0000556 | 12 | 1.478 | 0.614 | 0.614 |
| Pac | 0.0000556 | 13 | 1.423 | 0.592 | 0.592 |
| Pac | 0.0000556 | 14 | 1.517 | 0.612 | 0.612 |
| Pac | 0.0000556 | 15 | 1.443 | 0.604 | 0.604 |
| Pac | 0.0000556 | 16 | 1.431 | 0.583 | 0.583 |
| Pac | 0.0000556 | 17 | 1.557 | 0.599 | 0.599 |
| Pac | 0.0000556 | 18 | 1.48  | 0.626 | 0.626 |
| Pac | 0.0000556 | 19 | 1.547 | 0.626 | 0.626 |
| Pac | 0.0000556 | 20 | 1.507 | 0.611 | 0.611 |
| Pac | 0.0000556 | 21 | 1.458 | 0.61  | 0.61  |
| Pac | 0.0000556 | 22 | 1.367 | 0.589 | 0.589 |
| Pac | 0.0001667 | 1  | 1.506 | 0.608 | 0.608 |
| Pac | 0.0001667 | 2  | 1.554 | 0.611 | 0.611 |
| Pac | 0.0001667 | 3  | 1.602 | 0.624 | 0.624 |
| Pac | 0.0001667 | 4  | 1.569 | 0.617 | 0.617 |
| Pac | 0.0001667 | 5  | 1.661 | 0.624 | 0.661 |
| Pac | 0.0001667 | 6  | 1.595 | 0.618 | 0.618 |
| Pac | 0.0001667 | 7  | 1.587 | 0.629 | 0.629 |
| Pac | 0.0001667 | 8  | 1.583 | 0.622 | 0.622 |
| Pac | 0.0001667 | 9  | 1.581 | 0.626 | 0.626 |
| Pac | 0.0001667 | 10 | 1.596 | 0.611 | 0.611 |
| Pac | 0.0001667 | 11 | 1.546 | 0.614 | 0.614 |
| Pac | 0.0001667 | 12 | 1.575 | 0.614 | 0.614 |
| Pac | 0.0001667 | 13 | 1.511 | 0.602 | 0.602 |
| Pac | 0.0001667 | 14 | 1.591 | 0.62  | 0.62  |
| Pac | 0.0001667 | 15 | 1.532 | 0.605 | 0.605 |
| Pac | 0.0001667 | 16 | 1.483 | 0.609 | 0.609 |
| Pac | 0.0001667 | 17 | 1.67  | 0.61  | 0.67  |

|      |           |    |       |       |       |
|------|-----------|----|-------|-------|-------|
| Pac  | 0.0001667 | 18 | 1.6   | 0.613 | 0.613 |
| Pac  | 0.0001667 | 19 | 1.554 | 0.594 | 0.594 |
| Pac  | 0.0001667 | 20 | 1.587 | 0.612 | 0.612 |
| Pac  | 0.0001667 | 21 | 1.542 | 0.616 | 0.616 |
| Pac  | 0.0001667 | 22 | 1.522 | 0.609 | 0.609 |
| Pac  | 0.0005    | 1  | 1.526 | 0.629 | 0.629 |
| Pac  | 0.0005    | 2  | 1.564 | 0.619 | 0.619 |
| Pac  | 0.0005    | 3  | 1.608 | 0.636 | 0.636 |
| Pac  | 0.0005    | 4  | 1.568 | 0.617 | 0.617 |
| Pac  | 0.0005    | 5  | 1.682 | 0.61  | 0.682 |
| Pac  | 0.0005    | 6  | 1.595 | 0.624 | 0.624 |
| Pac  | 0.0005    | 7  | 1.561 | 0.625 | 0.625 |
| Pac  | 0.0005    | 8  | 1.592 | 0.613 | 0.613 |
| Pac  | 0.0005    | 9  | 1.562 | 0.622 | 0.622 |
| Pac  | 0.0005    | 10 | 1.597 | 0.621 | 0.621 |
| Pac  | 0.0005    | 11 | 1.56  | 0.632 | 0.632 |
| Pac  | 0.0005    | 12 | 1.628 | 0.621 | 0.628 |
| Pac  | 0.0005    | 13 | 1.57  | 0.616 | 0.616 |
| Pac  | 0.0005    | 14 | 1.64  | 0.618 | 0.64  |
| Pac  | 0.0005    | 15 | 1.53  | 0.619 | 0.619 |
| Pac  | 0.0005    | 16 | 1.586 | 0.612 | 0.612 |
| Pac  | 0.0005    | 17 | 1.681 | 0.608 | 0.681 |
| Pac  | 0.0005    | 18 | 1.627 | 0.633 | 0.633 |
| Pac  | 0.0005    | 19 | 1.654 | 0.618 | 0.654 |
| Pac  | 0.0005    | 20 | 1.64  | 0.619 | 0.64  |
| Pac  | 0.0005    | 21 | 1.566 | 0.639 | 0.639 |
| Pac  | 0.0005    | 22 | 1.475 | 0.615 | 0.615 |
| Rapa | 0.000001  | 1  | 1.068 | 0.544 | 0.544 |
| Rapa | 0.000001  | 2  | 1.146 | 0.573 | 0.573 |
| Rapa | 0.000001  | 3  | 1.181 | 0.59  | 0.59  |
| Rapa | 0.000001  | 4  | 1.185 | 0.586 | 0.586 |
| Rapa | 0.000001  | 5  | 1.264 | 0.605 | 0.605 |
| Rapa | 0.000001  | 6  | 1.158 | 0.583 | 0.583 |
| Rapa | 0.000001  | 7  | 1.164 | 0.578 | 0.578 |
| Rapa | 0.000001  | 8  | 1.184 | 0.581 | 0.581 |
| Rapa | 0.000001  | 9  | 1.153 | 0.576 | 0.576 |
| Rapa | 0.000001  | 10 | 1.193 | 0.6   | 0.6   |
| Rapa | 0.000001  | 11 | 1.149 | 0.571 | 0.571 |
| Rapa | 0.000001  | 12 | 1.168 | 0.584 | 0.584 |
| Rapa | 0.000001  | 13 | 1.118 | 0.562 | 0.562 |
| Rapa | 0.000001  | 14 | 1.203 | 0.587 | 0.587 |
| Rapa | 0.000001  | 15 | 1.115 | 0.56  | 0.56  |
| Rapa | 0.000001  | 16 | 1.095 | 0.538 | 0.538 |
| Rapa | 0.000001  | 17 | 1.252 | 0.591 | 0.591 |
| Rapa | 0.000001  | 18 | 1.181 | 0.601 | 0.601 |
| Rapa | 0.000001  | 19 | 1.208 | 0.603 | 0.603 |
| Rapa | 0.000001  | 20 | 1.221 | 0.605 | 0.605 |
| Rapa | 0.000001  | 21 | 1.122 | 0.569 | 0.569 |
| Rapa | 0.000001  | 22 | 1.071 | 0.546 | 0.546 |



|      |         |    |       |       |       |
|------|---------|----|-------|-------|-------|
| Rapa | 0.00001 | 1  | 1.389 | 0.602 | 0.602 |
| Rapa | 0.00001 | 2  | 1.462 | 0.607 | 0.607 |
| Rapa | 0.00001 | 3  | 1.485 | 0.614 | 0.614 |
| Rapa | 0.00001 | 4  | 1.493 | 0.609 | 0.609 |
| Rapa | 0.00001 | 5  | 1.575 | 0.607 | 0.607 |
| Rapa | 0.00001 | 6  | 1.487 | 0.621 | 0.621 |
| Rapa | 0.00001 | 7  | 1.476 | 0.62  | 0.62  |
| Rapa | 0.00001 | 8  | 1.49  | 0.609 | 0.609 |
| Rapa | 0.00001 | 9  | 1.457 | 0.608 | 0.608 |
| Rapa | 0.00001 | 10 | 1.521 | 0.606 | 0.606 |
| Rapa | 0.00001 | 11 | 1.447 | 0.615 | 0.615 |
| Rapa | 0.00001 | 12 | 1.474 | 0.605 | 0.605 |
| Rapa | 0.00001 | 13 | 1.464 | 0.61  | 0.61  |
| Rapa | 0.00001 | 14 | 1.552 | 0.614 | 0.614 |
| Rapa | 0.00001 | 15 | 1.456 | 0.596 | 0.596 |
| Rapa | 0.00001 | 16 | 1.47  | 0.609 | 0.609 |
| Rapa | 0.00001 | 17 | 1.531 | 0.594 | 0.594 |
| Rapa | 0.00001 | 18 | 1.523 | 0.621 | 0.621 |
| Rapa | 0.00001 | 19 | 1.503 | 0.611 | 0.611 |
| Rapa | 0.00001 | 20 | 1.539 | 0.625 | 0.625 |
| Rapa | 0.00001 | 21 | 1.424 | 0.598 | 0.598 |
| Rapa | 0.00001 | 22 | 1.405 | 0.608 | 0.608 |
| Rapa | 0.0001  | 1  | 1.412 | 0.608 | 0.608 |
| Rapa | 0.0001  | 2  | 1.487 | 0.623 | 0.623 |
| Rapa | 0.0001  | 3  | 1.541 | 0.624 | 0.624 |
| Rapa | 0.0001  | 4  | 1.487 | 0.611 | 0.611 |
| Rapa | 0.0001  | 5  | 1.613 | 0.629 | 0.629 |
| Rapa | 0.0001  | 6  | 1.515 | 0.627 | 0.627 |
| Rapa | 0.0001  | 7  | 1.496 | 0.627 | 0.627 |
| Rapa | 0.0001  | 8  | 1.533 | 0.619 | 0.619 |
| Rapa | 0.0001  | 9  | 1.501 | 0.62  | 0.62  |
| Rapa | 0.0001  | 10 | 1.568 | 0.625 | 0.625 |
| Rapa | 0.0001  | 11 | 1.456 | 0.621 | 0.621 |
| Rapa | 0.0001  | 12 | 1.501 | 0.618 | 0.618 |
| Rapa | 0.0001  | 13 | 1.475 | 0.608 | 0.608 |
| Rapa | 0.0001  | 14 | 1.525 | 0.618 | 0.618 |
| Rapa | 0.0001  | 15 | 1.469 | 0.606 | 0.606 |
| Rapa | 0.0001  | 16 | 1.482 | 0.603 | 0.603 |
| Rapa | 0.0001  | 17 | 1.576 | 0.605 | 0.605 |
| Rapa | 0.0001  | 18 | 1.53  | 0.622 | 0.622 |
| Rapa | 0.0001  | 19 | 1.561 | 0.626 | 0.626 |
| Rapa | 0.0001  | 20 | 1.539 | 0.621 | 0.621 |
| Rapa | 0.0001  | 21 | 1.492 | 0.623 | 0.623 |
| Rapa | 0.0001  | 22 | 1.44  | 0.599 | 0.599 |
| Rapa | 0.001   | 1  | 1.395 | 0.607 | 0.607 |
| Rapa | 0.001   | 2  | 1.44  | 0.601 | 0.601 |
| Rapa | 0.001   | 3  | 1.506 | 0.62  | 0.62  |
| Rapa | 0.001   | 4  | 1.468 | 0.605 | 0.605 |
| Rapa | 0.001   | 5  | 1.582 | 0.614 | 0.614 |

|      |       |    |       |       |       |
|------|-------|----|-------|-------|-------|
| Rapa | 0.001 | 6  | 1.455 | 0.608 | 0.608 |
| Rapa | 0.001 | 7  | 1.463 | 0.61  | 0.61  |
| Rapa | 0.001 | 8  | 1.499 | 0.615 | 0.615 |
| Rapa | 0.001 | 9  | 1.444 | 0.608 | 0.608 |
| Rapa | 0.001 | 10 | 1.518 | 0.617 | 0.617 |
| Rapa | 0.001 | 11 | 1.474 | 0.603 | 0.603 |
| Rapa | 0.001 | 12 | 1.477 | 0.62  | 0.62  |
| Rapa | 0.001 | 13 | 1.425 | 0.603 | 0.603 |
| Rapa | 0.001 | 14 | 1.54  | 0.61  | 0.61  |
| Rapa | 0.001 | 15 | 1.412 | 0.601 | 0.601 |
| Rapa | 0.001 | 16 | 1.478 | 0.602 | 0.602 |
| Rapa | 0.001 | 17 | 1.534 | 0.599 | 0.599 |
| Rapa | 0.001 | 18 | 1.486 | 0.614 | 0.614 |
| Rapa | 0.001 | 19 | 1.521 | 0.607 | 0.607 |
| Rapa | 0.001 | 20 | 1.505 | 0.615 | 0.615 |
| Rapa | 0.001 | 21 | 1.469 | 0.604 | 0.604 |
| Rapa | 0.001 | 22 | 1.453 | 0.599 | 0.599 |
| Temo | 0.125 | 1  | 1.352 | 0.592 | 0.592 |
| Temo | 0.125 | 2  | 1.412 | 0.589 | 0.589 |
| Temo | 0.125 | 3  | 1.473 | 0.612 | 0.612 |
| Temo | 0.125 | 4  | 1.214 | 0.548 | 0.548 |
| Temo | 0.125 | 5  | 1.325 | 0.587 | 0.587 |
| Temo | 0.125 | 6  | 1.456 | 0.613 | 0.613 |
| Temo | 0.125 | 7  | 1.441 | 0.616 | 0.616 |
| Temo | 0.125 | 8  | 1.474 | 0.606 | 0.606 |
| Temo | 0.125 | 9  | 1.434 | 0.61  | 0.61  |
| Temo | 0.125 | 10 | 1.48  | 0.612 | 0.612 |
| Temo | 0.125 | 11 | 1.4   | 0.599 | 0.599 |
| Temo | 0.125 | 12 | 1.516 | 0.616 | 0.616 |
| Temo | 0.125 | 13 | 1.449 | 0.604 | 0.604 |
| Temo | 0.125 | 14 | 1.267 | 0.565 | 0.565 |
| Temo | 0.125 | 15 | 1.446 | 0.615 | 0.615 |
| Temo | 0.125 | 16 | 1.405 | 0.589 | 0.589 |
| Temo | 0.125 | 17 | 1.299 | 0.575 | 0.575 |
| Temo | 0.125 | 18 | 1.469 | 0.609 | 0.609 |
| Temo | 0.125 | 19 | 1.506 | 0.608 | 0.608 |
| Temo | 0.125 | 20 | 1.538 | 0.637 | 0.637 |
| Temo | 0.125 | 21 | 1.429 | 0.608 | 0.608 |
| Temo | 0.125 | 22 | 1.345 | 0.563 | 0.563 |
| Temo | 0.25  | 1  | 1.203 | 0.55  | 0.55  |
| Temo | 0.25  | 2  | 1.267 | 0.564 | 0.564 |
| Temo | 0.25  | 3  | 1.351 | 0.597 | 0.597 |
| Temo | 0.25  | 4  | 1.303 | 0.578 | 0.578 |
| Temo | 0.25  | 5  | 1.439 | 0.598 | 0.598 |
| Temo | 0.25  | 6  | 1.284 | 0.579 | 0.579 |
| Temo | 0.25  | 7  | 1.301 | 0.587 | 0.587 |
| Temo | 0.25  | 8  | 1.322 | 0.586 | 0.586 |
| Temo | 0.25  | 9  | 1.266 | 0.576 | 0.576 |
| Temo | 0.25  | 10 | 1.369 | 0.592 | 0.592 |

|      |      |    |       |       |       |
|------|------|----|-------|-------|-------|
| Temo | 0.25 | 11 | 1.274 | 0.582 | 0.582 |
| Temo | 0.25 | 12 | 1.33  | 0.59  | 0.59  |
| Temo | 0.25 | 13 | 1.293 | 0.58  | 0.58  |
| Temo | 0.25 | 14 | 1.382 | 0.595 | 0.595 |
| Temo | 0.25 | 15 | 1.314 | 0.577 | 0.577 |
| Temo | 0.25 | 16 | 1.294 | 0.556 | 0.556 |
| Temo | 0.25 | 17 | 1.34  | 0.588 | 0.588 |
| Temo | 0.25 | 18 | 1.337 | 0.591 | 0.591 |
| Temo | 0.25 | 19 | 1.367 | 0.587 | 0.587 |
| Temo | 0.25 | 20 | 1.352 | 0.596 | 0.596 |
| Temo | 0.25 | 21 | 1.274 | 0.573 | 0.573 |
| Temo | 0.25 | 22 | 1.223 | 0.552 | 0.552 |
| Temo | 0.5  | 1  | 1.291 | 0.584 | 0.584 |
| Temo | 0.5  | 2  | 1.34  | 0.586 | 0.586 |
| Temo | 0.5  | 3  | 1.421 | 0.609 | 0.609 |
| Temo | 0.5  | 4  | 1.391 | 0.606 | 0.606 |
| Temo | 0.5  | 5  | 1.491 | 0.624 | 0.624 |
| Temo | 0.5  | 6  | 1.375 | 0.597 | 0.597 |
| Temo | 0.5  | 7  | 1.367 | 0.604 | 0.604 |
| Temo | 0.5  | 8  | 1.397 | 0.593 | 0.593 |
| Temo | 0.5  | 9  | 1.371 | 0.597 | 0.597 |
| Temo | 0.5  | 10 | 1.412 | 0.609 | 0.609 |
| Temo | 0.5  | 11 | 1.35  | 0.584 | 0.584 |
| Temo | 0.5  | 12 | 1.403 | 0.605 | 0.605 |
| Temo | 0.5  | 13 | 1.332 | 0.592 | 0.592 |
| Temo | 0.5  | 14 | 1.435 | 0.606 | 0.606 |
| Temo | 0.5  | 15 | 1.317 | 0.576 | 0.576 |
| Temo | 0.5  | 16 | 1.334 | 0.588 | 0.588 |
| Temo | 0.5  | 17 | 1.5   | 0.612 | 0.612 |
| Temo | 0.5  | 18 | 1.375 | 0.61  | 0.61  |
| Temo | 0.5  | 19 | 1.39  | 0.609 | 0.609 |
| Temo | 0.5  | 20 | 1.434 | 0.616 | 0.616 |
| Temo | 0.5  | 21 | 1.307 | 0.583 | 0.583 |
| Temo | 0.5  | 22 | 1.305 | 0.581 | 0.581 |
| Temo | 1    | 1  | 1.397 | 0.599 | 0.599 |
| Temo | 1    | 2  | 1.436 | 0.6   | 0.6   |
| Temo | 1    | 3  | 1.652 | 0.626 | 0.652 |
| Temo | 1    | 4  | 1.462 | 0.615 | 0.615 |
| Temo | 1    | 5  | 1.577 | 0.614 | 0.614 |
| Temo | 1    | 6  | 1.597 | 0.617 | 0.617 |
| Temo | 1    | 7  | 1.585 | 0.628 | 0.628 |
| Temo | 1    | 8  | 1.48  | 0.597 | 0.597 |
| Temo | 1    | 9  | 1.582 | 0.625 | 0.625 |
| Temo | 1    | 10 | 1.635 | 0.617 | 0.635 |
| Temo | 1    | 11 | 1.574 | 0.611 | 0.611 |
| Temo | 1    | 12 | 1.622 | 0.627 | 0.627 |
| Temo | 1    | 13 | 1.553 | 0.625 | 0.625 |
| Temo | 1    | 14 | 1.531 | 0.607 | 0.607 |
| Temo | 1    | 15 | 1.529 | 0.606 | 0.606 |

|      |          |    |       |       |       |
|------|----------|----|-------|-------|-------|
| Temo | 1        | 16 | 1.547 | 0.607 | 0.607 |
| Temo | 1        | 17 | 1.552 | 0.606 | 0.606 |
| Temo | 1        | 18 | 1.606 | 0.614 | 0.614 |
| Temo | 1        | 19 | 1.662 | 0.617 | 0.662 |
| Temo | 1        | 20 | 1.634 | 0.632 | 0.634 |
| Temo | 1        | 21 | 1.497 | 0.613 | 0.613 |
| Temo | 1        | 22 | 1.562 | 0.619 | 0.619 |
| Teni | 0.000256 | 1  | 1.507 | 0.625 | 0.625 |
| Teni | 0.000256 | 2  | 1.559 | 0.627 | 0.627 |
| Teni | 0.000256 | 3  | 1.621 | 0.631 | 0.631 |
| Teni | 0.000256 | 4  | 1.603 | 0.625 | 0.625 |
| Teni | 0.000256 | 5  | 1.67  | 0.625 | 0.67  |
| Teni | 0.000256 | 6  | 1.583 | 0.628 | 0.628 |
| Teni | 0.000256 | 7  | 1.539 | 0.624 | 0.624 |
| Teni | 0.000256 | 8  | 1.593 | 0.62  | 0.62  |
| Teni | 0.000256 | 9  | 1.572 | 0.618 | 0.618 |
| Teni | 0.000256 | 10 | 1.656 | 0.634 | 0.656 |
| Teni | 0.000256 | 11 | 1.585 | 0.637 | 0.637 |
| Teni | 0.000256 | 12 | 1.596 | 0.615 | 0.615 |
| Teni | 0.000256 | 13 | 1.551 | 0.626 | 0.626 |
| Teni | 0.000256 | 14 | 1.625 | 0.631 | 0.631 |
| Teni | 0.000256 | 15 | 1.542 | 0.636 | 0.636 |
| Teni | 0.000256 | 16 | 1.483 | 0.609 | 0.609 |
| Teni | 0.000256 | 17 | 1.666 | 0.612 | 0.666 |
| Teni | 0.000256 | 18 | 1.603 | 0.617 | 0.617 |
| Teni | 0.000256 | 19 | 1.601 | 0.617 | 0.617 |
| Teni | 0.000256 | 20 | 1.642 | 0.634 | 0.642 |
| Teni | 0.000256 | 21 | 1.519 | 0.621 | 0.621 |
| Teni | 0.000256 | 22 | 1.52  | 0.604 | 0.604 |
| Teni | 0.00064  | 1  | 1.367 | 0.587 | 0.587 |
| Teni | 0.00064  | 2  | 1.452 | 0.612 | 0.612 |
| Teni | 0.00064  | 3  | 1.506 | 0.618 | 0.618 |
| Teni | 0.00064  | 4  | 1.433 | 0.606 | 0.606 |
| Teni | 0.00064  | 5  | 1.563 | 0.612 | 0.612 |
| Teni | 0.00064  | 6  | 1.459 | 0.611 | 0.611 |
| Teni | 0.00064  | 7  | 1.499 | 0.61  | 0.61  |
| Teni | 0.00064  | 8  | 1.512 | 0.607 | 0.607 |
| Teni | 0.00064  | 9  | 1.487 | 0.61  | 0.61  |
| Teni | 0.00064  | 10 | 1.523 | 0.619 | 0.619 |
| Teni | 0.00064  | 11 | 1.485 | 0.608 | 0.608 |
| Teni | 0.00064  | 12 | 1.527 | 0.622 | 0.622 |
| Teni | 0.00064  | 13 | 1.466 | 0.598 | 0.598 |
| Teni | 0.00064  | 14 | 1.524 | 0.624 | 0.624 |
| Teni | 0.00064  | 15 | 1.466 | 0.621 | 0.621 |
| Teni | 0.00064  | 16 | 1.436 | 0.588 | 0.588 |
| Teni | 0.00064  | 17 | 1.517 | 0.604 | 0.604 |
| Teni | 0.00064  | 18 | 1.502 | 0.613 | 0.613 |
| Teni | 0.00064  | 19 | 1.53  | 0.602 | 0.602 |
| Teni | 0.00064  | 20 | 1.525 | 0.607 | 0.607 |

|      |          |    |       |       |       |
|------|----------|----|-------|-------|-------|
| Teni | 0.00064  | 21 | 1.46  | 0.6   | 0.6   |
| Teni | 0.00064  | 22 | 1.408 | 0.599 | 0.599 |
| Teni | 0.0016   | 1  | 1.284 | 0.568 | 0.568 |
| Teni | 0.0016   | 2  | 1.363 | 0.592 | 0.592 |
| Teni | 0.0016   | 3  | 1.424 | 0.608 | 0.608 |
| Teni | 0.0016   | 4  | 1.403 | 0.605 | 0.605 |
| Teni | 0.0016   | 5  | 1.507 | 0.611 | 0.611 |
| Teni | 0.0016   | 6  | 1.373 | 0.59  | 0.59  |
| Teni | 0.0016   | 7  | 1.386 | 0.601 | 0.601 |
| Teni | 0.0016   | 8  | 1.429 | 0.607 | 0.607 |
| Teni | 0.0016   | 9  | 1.384 | 0.596 | 0.596 |
| Teni | 0.0016   | 10 | 1.436 | 0.605 | 0.605 |
| Teni | 0.0016   | 11 | 1.393 | 0.594 | 0.594 |
| Teni | 0.0016   | 12 | 1.412 | 0.614 | 0.614 |
| Teni | 0.0016   | 13 | 1.374 | 0.584 | 0.584 |
| Teni | 0.0016   | 14 | 1.465 | 0.615 | 0.615 |
| Teni | 0.0016   | 15 | 1.362 | 0.599 | 0.599 |
| Teni | 0.0016   | 16 | 1.336 | 0.586 | 0.586 |
| Teni | 0.0016   | 17 | 1.46  | 0.6   | 0.6   |
| Teni | 0.0016   | 18 | 1.427 | 0.606 | 0.606 |
| Teni | 0.0016   | 19 | 1.442 | 0.591 | 0.591 |
| Teni | 0.0016   | 20 | 1.449 | 0.608 | 0.608 |
| Teni | 0.0016   | 21 | 1.37  | 0.6   | 0.6   |
| Teni | 0.0016   | 22 | 1.325 | 0.569 | 0.569 |
| Teni | 0.004    | 1  | 1.367 | 0.593 | 0.593 |
| Teni | 0.004    | 2  | 1.434 | 0.603 | 0.603 |
| Teni | 0.004    | 3  | 1.544 | 0.619 | 0.619 |
| Teni | 0.004    | 4  | 1.505 | 0.615 | 0.615 |
| Teni | 0.004    | 5  | 1.614 | 0.614 | 0.614 |
| Teni | 0.004    | 6  | 1.458 | 0.609 | 0.609 |
| Teni | 0.004    | 7  | 1.487 | 0.621 | 0.621 |
| Teni | 0.004    | 8  | 1.473 | 0.599 | 0.599 |
| Teni | 0.004    | 9  | 1.469 | 0.611 | 0.611 |
| Teni | 0.004    | 10 | 1.527 | 0.609 | 0.609 |
| Teni | 0.004    | 11 | 1.443 | 0.62  | 0.62  |
| Teni | 0.004    | 12 | 1.533 | 0.623 | 0.623 |
| Teni | 0.004    | 13 | 1.438 | 0.599 | 0.599 |
| Teni | 0.004    | 14 | 1.532 | 0.613 | 0.613 |
| Teni | 0.004    | 15 | 1.455 | 0.607 | 0.607 |
| Teni | 0.004    | 16 | 1.427 | 0.597 | 0.597 |
| Teni | 0.004    | 17 | 1.572 | 0.613 | 0.613 |
| Teni | 0.004    | 18 | 1.489 | 0.606 | 0.606 |
| Teni | 0.004    | 19 | 1.512 | 0.619 | 0.619 |
| Teni | 0.004    | 20 | 1.529 | 0.619 | 0.619 |
| Teni | 0.004    | 21 | 1.456 | 0.617 | 0.617 |
| Teni | 0.004    | 22 | 1.426 | 0.61  | 0.61  |
| Topo | 0.000003 | 1  | 1.107 | 0.527 | 0.527 |
| Topo | 0.000003 | 2  | 1.169 | 0.549 | 0.549 |
| Topo | 0.000003 | 3  | 1.216 | 0.571 | 0.571 |

|      |          |    |       |       |       |
|------|----------|----|-------|-------|-------|
| Topo | 0.000003 | 4  | 1.195 | 0.558 | 0.558 |
| Topo | 0.000003 | 5  | 1.289 | 0.584 | 0.584 |
| Topo | 0.000003 | 6  | 1.202 | 0.562 | 0.562 |
| Topo | 0.000003 | 7  | 1.178 | 0.558 | 0.558 |
| Topo | 0.000003 | 8  | 1.202 | 0.56  | 0.56  |
| Topo | 0.000003 | 9  | 1.159 | 0.545 | 0.545 |
| Topo | 0.000003 | 10 | 1.242 | 0.575 | 0.575 |
| Topo | 0.000003 | 11 | 1.191 | 0.555 | 0.555 |
| Topo | 0.000003 | 12 | 1.18  | 0.558 | 0.558 |
| Topo | 0.000003 | 13 | 1.165 | 0.554 | 0.554 |
| Topo | 0.000003 | 14 | 1.23  | 0.565 | 0.565 |
| Topo | 0.000003 | 15 | 1.166 | 0.558 | 0.558 |
| Topo | 0.000003 | 16 | 1.141 | 0.539 | 0.539 |
| Topo | 0.000003 | 17 | 1.279 | 0.573 | 0.573 |
| Topo | 0.000003 | 18 | 1.186 | 0.561 | 0.561 |
| Topo | 0.000003 | 19 | 1.21  | 0.57  | 0.57  |
| Topo | 0.000003 | 20 | 1.234 | 0.562 | 0.562 |
| Topo | 0.000003 | 21 | 1.151 | 0.542 | 0.542 |
| Topo | 0.000003 | 22 | 1.108 | 0.527 | 0.527 |
| Topo | 0.000006 | 1  | 1.264 | 0.574 | 0.574 |
| Topo | 0.000006 | 2  | 1.288 | 0.584 | 0.584 |
| Topo | 0.000006 | 3  | 1.372 | 0.606 | 0.606 |
| Topo | 0.000006 | 4  | 1.313 | 0.588 | 0.588 |
| Topo | 0.000006 | 5  | 1.45  | 0.617 | 0.617 |
| Topo | 0.000006 | 6  | 1.345 | 0.596 | 0.596 |
| Topo | 0.000006 | 7  | 1.339 | 0.594 | 0.594 |
| Topo | 0.000006 | 8  | 1.341 | 0.592 | 0.592 |
| Topo | 0.000006 | 9  | 1.353 | 0.591 | 0.591 |
| Topo | 0.000006 | 10 | 1.378 | 0.597 | 0.597 |
| Topo | 0.000006 | 11 | 1.314 | 0.587 | 0.587 |
| Topo | 0.000006 | 12 | 1.362 | 0.601 | 0.601 |
| Topo | 0.000006 | 13 | 1.31  | 0.575 | 0.575 |
| Topo | 0.000006 | 14 | 1.352 | 0.599 | 0.599 |
| Topo | 0.000006 | 15 | 1.322 | 0.587 | 0.587 |
| Topo | 0.000006 | 16 | 1.295 | 0.571 | 0.571 |
| Topo | 0.000006 | 17 | 1.419 | 0.601 | 0.601 |
| Topo | 0.000006 | 18 | 1.376 | 0.593 | 0.593 |
| Topo | 0.000006 | 19 | 1.394 | 0.614 | 0.614 |
| Topo | 0.000006 | 20 | 1.408 | 0.598 | 0.598 |
| Topo | 0.000006 | 21 | 1.299 | 0.599 | 0.599 |
| Topo | 0.000006 | 22 | 1.27  | 0.564 | 0.564 |
| Topo | 0.000014 | 1  | 1.49  | 0.617 | 0.617 |
| Topo | 0.000014 | 2  | 1.532 | 0.615 | 0.615 |
| Topo | 0.000014 | 3  | 1.595 | 0.63  | 0.63  |
| Topo | 0.000014 | 4  | 1.549 | 0.613 | 0.613 |
| Topo | 0.000014 | 5  | 1.666 | 0.619 | 0.666 |
| Topo | 0.000014 | 6  | 1.57  | 0.626 | 0.626 |
| Topo | 0.000014 | 7  | 1.58  | 0.63  | 0.63  |
| Topo | 0.000014 | 8  | 1.55  | 0.606 | 0.606 |

|      |          |    |       |       |       |
|------|----------|----|-------|-------|-------|
| Topo | 0.000014 | 9  | 1.566 | 0.633 | 0.633 |
| Topo | 0.000014 | 10 | 1.59  | 0.62  | 0.62  |
| Topo | 0.000014 | 11 | 1.565 | 0.626 | 0.626 |
| Topo | 0.000014 | 12 | 1.595 | 0.62  | 0.62  |
| Topo | 0.000014 | 13 | 1.502 | 0.613 | 0.613 |
| Topo | 0.000014 | 14 | 1.607 | 0.615 | 0.615 |
| Topo | 0.000014 | 15 | 1.493 | 0.623 | 0.623 |
| Topo | 0.000014 | 16 | 1.495 | 0.61  | 0.61  |
| Topo | 0.000014 | 17 | 1.595 | 0.611 | 0.611 |
| Topo | 0.000014 | 18 | 1.57  | 0.622 | 0.622 |
| Topo | 0.000014 | 19 | 1.592 | 0.616 | 0.616 |
| Topo | 0.000014 | 20 | 1.603 | 0.624 | 0.624 |
| Topo | 0.000014 | 21 | 1.537 | 0.617 | 0.617 |
| Topo | 0.000014 | 22 | 1.501 | 0.616 | 0.616 |
| Topo | 0.00003  | 1  | 1.439 | 0.608 | 0.608 |
| Topo | 0.00003  | 2  | 1.473 | 0.608 | 0.608 |
| Topo | 0.00003  | 3  | 1.652 | 0.631 | 0.652 |
| Topo | 0.00003  | 4  | 1.522 | 0.613 | 0.613 |
| Topo | 0.00003  | 5  | 1.643 | 0.612 | 0.643 |
| Topo | 0.00003  | 6  | 1.587 | 0.619 | 0.619 |
| Topo | 0.00003  | 7  | 1.583 | 0.627 | 0.627 |
| Topo | 0.00003  | 8  | 1.532 | 0.605 | 0.605 |
| Topo | 0.00003  | 9  | 1.635 | 0.624 | 0.635 |
| Topo | 0.00003  | 10 | 1.644 | 0.632 | 0.644 |
| Topo | 0.00003  | 11 | 1.612 | 0.621 | 0.621 |
| Topo | 0.00003  | 12 | 1.621 | 0.611 | 0.621 |
| Topo | 0.00003  | 13 | 1.598 | 0.62  | 0.62  |
| Topo | 0.00003  | 14 | 1.687 | 0.615 | 0.687 |
| Topo | 0.00003  | 15 | 1.556 | 0.612 | 0.612 |
| Topo | 0.00003  | 16 | 1.576 | 0.602 | 0.602 |
| Topo | 0.00003  | 17 | 1.612 | 0.604 | 0.612 |
| Topo | 0.00003  | 18 | 1.61  | 0.624 | 0.624 |
| Topo | 0.00003  | 19 | 1.68  | 0.623 | 0.68  |
| Topo | 0.00003  | 20 | 1.639 | 0.622 | 0.639 |
| Topo | 0.00003  | 21 | 1.548 | 0.627 | 0.627 |
| Topo | 0.00003  | 22 | 1.572 | 0.599 | 0.599 |
| Vinb | 0.000005 | 1  | 1.419 | 0.61  | 0.61  |
| Vinb | 0.000005 | 2  | 1.485 | 0.614 | 0.614 |
| Vinb | 0.000005 | 3  | 1.563 | 0.627 | 0.627 |
| Vinb | 0.000005 | 4  | 1.537 | 0.625 | 0.625 |
| Vinb | 0.000005 | 5  | 1.659 | 0.622 | 0.659 |
| Vinb | 0.000005 | 6  | 1.523 | 0.618 | 0.618 |
| Vinb | 0.000005 | 7  | 1.507 | 0.624 | 0.624 |
| Vinb | 0.000005 | 8  | 1.526 | 0.617 | 0.617 |
| Vinb | 0.000005 | 9  | 1.495 | 0.618 | 0.618 |
| Vinb | 0.000005 | 10 | 1.586 | 0.631 | 0.631 |
| Vinb | 0.000005 | 11 | 1.513 | 0.614 | 0.614 |
| Vinb | 0.000005 | 12 | 1.539 | 0.613 | 0.613 |
| Vinb | 0.000005 | 13 | 1.487 | 0.609 | 0.609 |

|      |          |    |       |       |       |
|------|----------|----|-------|-------|-------|
| Vinb | 0.000005 | 14 | 1.568 | 0.626 | 0.626 |
| Vinb | 0.000005 | 15 | 1.472 | 0.619 | 0.619 |
| Vinb | 0.000005 | 16 | 1.491 | 0.605 | 0.605 |
| Vinb | 0.000005 | 17 | 1.617 | 0.609 | 0.617 |
| Vinb | 0.000005 | 18 | 1.575 | 0.636 | 0.636 |
| Vinb | 0.000005 | 19 | 1.581 | 0.621 | 0.621 |
| Vinb | 0.000005 | 20 | 1.585 | 0.637 | 0.637 |
| Vinb | 0.000005 | 21 | 1.476 | 0.612 | 0.612 |
| Vinb | 0.000005 | 22 | 1.459 | 0.601 | 0.601 |
| Vinb | 0.00001  | 1  | 1.489 | 0.615 | 0.615 |
| Vinb | 0.00001  | 2  | 1.542 | 0.63  | 0.63  |
| Vinb | 0.00001  | 3  | 1.632 | 0.636 | 0.636 |
| Vinb | 0.00001  | 4  | 1.52  | 0.617 | 0.617 |
| Vinb | 0.00001  | 5  | 1.619 | 0.612 | 0.619 |
| Vinb | 0.00001  | 6  | 1.551 | 0.613 | 0.613 |
| Vinb | 0.00001  | 7  | 1.573 | 0.633 | 0.633 |
| Vinb | 0.00001  | 8  | 1.587 | 0.61  | 0.61  |
| Vinb | 0.00001  | 9  | 1.558 | 0.622 | 0.622 |
| Vinb | 0.00001  | 10 | 1.656 | 0.638 | 0.656 |
| Vinb | 0.00001  | 11 | 1.585 | 0.641 | 0.641 |
| Vinb | 0.00001  | 12 | 1.604 | 0.627 | 0.627 |
| Vinb | 0.00001  | 13 | 1.564 | 0.624 | 0.624 |
| Vinb | 0.00001  | 14 | 1.584 | 0.632 | 0.632 |
| Vinb | 0.00001  | 15 | 1.578 | 0.63  | 0.63  |
| Vinb | 0.00001  | 16 | 1.505 | 0.6   | 0.6   |
| Vinb | 0.00001  | 17 | 1.643 | 0.629 | 0.643 |
| Vinb | 0.00001  | 18 | 1.596 | 0.62  | 0.62  |
| Vinb | 0.00001  | 19 | 1.61  | 0.625 | 0.625 |
| Vinb | 0.00001  | 20 | 1.651 | 0.638 | 0.651 |
| Vinb | 0.00001  | 21 | 1.574 | 0.628 | 0.628 |
| Vinb | 0.00001  | 22 | 1.516 | 0.622 | 0.622 |
| Vinb | 0.00002  | 1  | 1.443 | 0.61  | 0.61  |
| Vinb | 0.00002  | 2  | 1.508 | 0.614 | 0.614 |
| Vinb | 0.00002  | 3  | 1.588 | 0.628 | 0.628 |
| Vinb | 0.00002  | 4  | 1.543 | 0.625 | 0.625 |
| Vinb | 0.00002  | 5  | 1.642 | 0.623 | 0.642 |
| Vinb | 0.00002  | 6  | 1.533 | 0.61  | 0.61  |
| Vinb | 0.00002  | 7  | 1.558 | 0.623 | 0.623 |
| Vinb | 0.00002  | 8  | 1.557 | 0.616 | 0.616 |
| Vinb | 0.00002  | 9  | 1.538 | 0.62  | 0.62  |
| Vinb | 0.00002  | 10 | 1.58  | 0.615 | 0.615 |
| Vinb | 0.00002  | 11 | 1.516 | 0.616 | 0.616 |
| Vinb | 0.00002  | 12 | 1.589 | 0.621 | 0.621 |
| Vinb | 0.00002  | 13 | 1.527 | 0.603 | 0.603 |
| Vinb | 0.00002  | 14 | 1.618 | 0.622 | 0.622 |
| Vinb | 0.00002  | 15 | 1.49  | 0.615 | 0.615 |
| Vinb | 0.00002  | 16 | 1.47  | 0.613 | 0.613 |
| Vinb | 0.00002  | 17 | 1.576 | 0.6   | 0.6   |
| Vinb | 0.00002  | 18 | 1.546 | 0.616 | 0.616 |



|      |           |    |       |       |       |
|------|-----------|----|-------|-------|-------|
| Vinb | 0.00002   | 19 | 1.566 | 0.62  | 0.62  |
| Vinb | 0.00002   | 20 | 1.58  | 0.609 | 0.609 |
| Vinb | 0.00002   | 21 | 1.493 | 0.613 | 0.613 |
| Vinb | 0.00002   | 22 | 1.499 | 0.611 | 0.611 |
| Vinb | 0.00004   | 1  | 1.55  | 0.62  | 0.62  |
| Vinb | 0.00004   | 2  | 1.636 | 0.627 | 0.636 |
| Vinb | 0.00004   | 3  | 1.69  | 0.619 | 0.69  |
| Vinb | 0.00004   | 4  | 1.646 | 0.622 | 0.646 |
| Vinb | 0.00004   | 5  | 1.738 | 0.61  | 0.738 |
| Vinb | 0.00004   | 6  | 1.672 | 0.619 | 0.672 |
| Vinb | 0.00004   | 7  | 1.692 | 0.628 | 0.692 |
| Vinb | 0.00004   | 8  | 1.669 | 0.607 | 0.669 |
| Vinb | 0.00004   | 9  | 1.66  | 0.634 | 0.66  |
| Vinb | 0.00004   | 10 | 1.681 | 0.608 | 0.681 |
| Vinb | 0.00004   | 11 | 1.63  | 0.609 | 0.63  |
| Vinb | 0.00004   | 12 | 1.683 | 0.625 | 0.683 |
| Vinb | 0.00004   | 13 | 1.636 | 0.619 | 0.636 |
| Vinb | 0.00004   | 14 | 1.694 | 0.613 | 0.694 |
| Vinb | 0.00004   | 15 | 1.605 | 0.617 | 0.617 |
| Vinb | 0.00004   | 16 | 1.561 | 0.6   | 0.6   |
| Vinb | 0.00004   | 17 | 1.65  | 0.6   | 0.65  |
| Vinb | 0.00004   | 18 | 1.709 | 0.622 | 0.709 |
| Vinb | 0.00004   | 19 | 1.716 | 0.619 | 0.716 |
| Vinb | 0.00004   | 20 | 1.71  | 0.614 | 0.71  |
| Vinb | 0.00004   | 21 | 1.707 | 0.621 | 0.707 |
| Vinb | 0.00004   | 22 | 1.607 | 0.63  | 0.63  |
| Vinc | 0.0000125 | 1  | 1.188 | 0.562 | 0.562 |
| Vinc | 0.0000125 | 2  | 1.238 | 0.57  | 0.57  |
| Vinc | 0.0000125 | 3  | 1.358 | 0.606 | 0.606 |
| Vinc | 0.0000125 | 4  | 1.265 | 0.58  | 0.58  |
| Vinc | 0.0000125 | 5  | 1.404 | 0.608 | 0.608 |
| Vinc | 0.0000125 | 6  | 1.299 | 0.587 | 0.587 |
| Vinc | 0.0000125 | 7  | 1.321 | 0.603 | 0.603 |
| Vinc | 0.0000125 | 8  | 1.307 | 0.586 | 0.586 |
| Vinc | 0.0000125 | 9  | 1.291 | 0.594 | 0.594 |
| Vinc | 0.0000125 | 10 | 1.383 | 0.608 | 0.608 |
| Vinc | 0.0000125 | 11 | 1.298 | 0.599 | 0.599 |
| Vinc | 0.0000125 | 12 | 1.331 | 0.597 | 0.597 |
| Vinc | 0.0000125 | 13 | 1.319 | 0.602 | 0.602 |
| Vinc | 0.0000125 | 14 | 1.389 | 0.603 | 0.603 |
| Vinc | 0.0000125 | 15 | 1.295 | 0.593 | 0.593 |
| Vinc | 0.0000125 | 16 | 1.294 | 0.572 | 0.572 |
| Vinc | 0.0000125 | 17 | 1.344 | 0.584 | 0.584 |
| Vinc | 0.0000125 | 18 | 1.347 | 0.597 | 0.597 |
| Vinc | 0.0000125 | 19 | 1.38  | 0.607 | 0.607 |
| Vinc | 0.0000125 | 20 | 1.377 | 0.611 | 0.611 |
| Vinc | 0.0000125 | 21 | 1.294 | 0.594 | 0.594 |
| Vinc | 0.0000125 | 22 | 1.256 | 0.567 | 0.567 |
| Vinc | 0.000025  | 1  | 1.303 | 0.583 | 0.583 |

|      |          |    |       |       |       |
|------|----------|----|-------|-------|-------|
| Vinc | 0.000025 | 2  | 1.337 | 0.591 | 0.591 |
| Vinc | 0.000025 | 3  | 1.429 | 0.61  | 0.61  |
| Vinc | 0.000025 | 4  | 1.356 | 0.593 | 0.593 |
| Vinc | 0.000025 | 5  | 1.497 | 0.608 | 0.608 |
| Vinc | 0.000025 | 6  | 1.356 | 0.594 | 0.594 |
| Vinc | 0.000025 | 7  | 1.354 | 0.599 | 0.599 |
| Vinc | 0.000025 | 8  | 1.415 | 0.607 | 0.607 |
| Vinc | 0.000025 | 9  | 1.364 | 0.593 | 0.593 |
| Vinc | 0.000025 | 10 | 1.408 | 0.603 | 0.603 |
| Vinc | 0.000025 | 11 | 1.362 | 0.604 | 0.604 |
| Vinc | 0.000025 | 12 | 1.367 | 0.593 | 0.593 |
| Vinc | 0.000025 | 13 | 1.336 | 0.601 | 0.601 |
| Vinc | 0.000025 | 14 | 1.396 | 0.589 | 0.589 |
| Vinc | 0.000025 | 15 | 1.316 | 0.598 | 0.598 |
| Vinc | 0.000025 | 16 | 1.321 | 0.583 | 0.583 |
| Vinc | 0.000025 | 17 | 1.443 | 0.591 | 0.591 |
| Vinc | 0.000025 | 18 | 1.415 | 0.606 | 0.606 |
| Vinc | 0.000025 | 19 | 1.418 | 0.61  | 0.61  |
| Vinc | 0.000025 | 20 | 1.429 | 0.606 | 0.606 |
| Vinc | 0.000025 | 21 | 1.336 | 0.586 | 0.586 |
| Vinc | 0.000025 | 22 | 1.305 | 0.594 | 0.594 |
| Vinc | 0.00005  | 1  | 1.435 | 0.612 | 0.612 |
| Vinc | 0.00005  | 2  | 1.491 | 0.62  | 0.62  |
| Vinc | 0.00005  | 3  | 1.566 | 0.63  | 0.63  |
| Vinc | 0.00005  | 4  | 1.506 | 0.615 | 0.615 |
| Vinc | 0.00005  | 5  | 1.593 | 0.622 | 0.622 |
| Vinc | 0.00005  | 6  | 1.501 | 0.615 | 0.615 |
| Vinc | 0.00005  | 7  | 1.497 | 0.618 | 0.618 |
| Vinc | 0.00005  | 8  | 1.523 | 0.617 | 0.617 |
| Vinc | 0.00005  | 9  | 1.468 | 0.628 | 0.628 |
| Vinc | 0.00005  | 10 | 1.583 | 0.623 | 0.623 |
| Vinc | 0.00005  | 11 | 1.539 | 0.621 | 0.621 |
| Vinc | 0.00005  | 12 | 1.527 | 0.619 | 0.619 |
| Vinc | 0.00005  | 13 | 1.462 | 0.611 | 0.611 |
| Vinc | 0.00005  | 14 | 1.55  | 0.608 | 0.608 |
| Vinc | 0.00005  | 15 | 1.446 | 0.61  | 0.61  |
| Vinc | 0.00005  | 16 | 1.458 | 0.601 | 0.601 |
| Vinc | 0.00005  | 17 | 1.553 | 0.617 | 0.617 |
| Vinc | 0.00005  | 18 | 1.526 | 0.64  | 0.64  |
| Vinc | 0.00005  | 19 | 1.536 | 0.621 | 0.621 |
| Vinc | 0.00005  | 20 | 1.533 | 0.624 | 0.624 |
| Vinc | 0.00005  | 21 | 1.475 | 0.612 | 0.612 |
| Vinc | 0.00005  | 22 | 1.437 | 0.588 | 0.588 |
| Vinc | 0.0001   | 1  | 1.047 | 0.505 | 0.505 |
| Vinc | 0.0001   | 2  | 1.109 | 0.529 | 0.529 |
| Vinc | 0.0001   | 3  | 1.145 | 0.55  | 0.55  |
| Vinc | 0.0001   | 4  | 1.114 | 0.525 | 0.525 |
| Vinc | 0.0001   | 5  | 1.213 | 0.556 | 0.556 |
| Vinc | 0.0001   | 6  | 1.13  | 0.533 | 0.533 |

|      |           |    |       |       |       |
|------|-----------|----|-------|-------|-------|
| Vinc | 0.0001    | 7  | 1.113 | 0.529 | 0.529 |
| Vinc | 0.0001    | 8  | 1.153 | 0.533 | 0.533 |
| Vinc | 0.0001    | 9  | 1.108 | 0.519 | 0.519 |
| Vinc | 0.0001    | 10 | 1.171 | 0.546 | 0.546 |
| Vinc | 0.0001    | 11 | 1.139 | 0.533 | 0.533 |
| Vinc | 0.0001    | 12 | 1.147 | 0.539 | 0.539 |
| Vinc | 0.0001    | 13 | 1.114 | 0.524 | 0.524 |
| Vinc | 0.0001    | 14 | 1.182 | 0.547 | 0.547 |
| Vinc | 0.0001    | 15 | 1.09  | 0.514 | 0.514 |
| Vinc | 0.0001    | 16 | 1.115 | 0.509 | 0.509 |
| Vinc | 0.0001    | 17 | 1.217 | 0.552 | 0.552 |
| Vinc | 0.0001    | 18 | 1.165 | 0.544 | 0.544 |
| Vinc | 0.0001    | 19 | 1.169 | 0.559 | 0.559 |
| Vinc | 0.0001    | 20 | 1.169 | 0.562 | 0.562 |
| Vinc | 0.0001    | 21 | 1.122 | 0.532 | 0.532 |
| Vinc | 0.0001    | 22 | 1.034 | 0.509 | 0.509 |
| Vino | 0.0000593 | 1  | 1.485 | 0.627 | 0.627 |
| Vino | 0.0000593 | 2  | 1.605 | 0.63  | 0.63  |
| Vino | 0.0000593 | 3  | 1.673 | 0.631 | 0.673 |
| Vino | 0.0000593 | 4  | 1.537 | 0.608 | 0.608 |
| Vino | 0.0000593 | 5  | 1.739 | 0.622 | 0.739 |
| Vino | 0.0000593 | 6  | 1.61  | 0.626 | 0.626 |
| Vino | 0.0000593 | 7  | 1.604 | 0.625 | 0.625 |
| Vino | 0.0000593 | 8  | 1.647 | 0.629 | 0.647 |
| Vino | 0.0000593 | 9  | 1.623 | 0.64  | 0.64  |
| Vino | 0.0000593 | 10 | 1.609 | 0.633 | 0.633 |
| Vino | 0.0000593 | 11 | 1.637 | 0.639 | 0.639 |
| Vino | 0.0000593 | 12 | 1.635 | 0.63  | 0.635 |
| Vino | 0.0000593 | 13 | 1.611 | 0.626 | 0.626 |
| Vino | 0.0000593 | 14 | 1.613 | 0.624 | 0.624 |
| Vino | 0.0000593 | 15 | 1.58  | 0.622 | 0.622 |
| Vino | 0.0000593 | 16 | 1.477 | 0.594 | 0.594 |
| Vino | 0.0000593 | 17 | 1.599 | 0.602 | 0.602 |
| Vino | 0.0000593 | 18 | 1.645 | 0.624 | 0.645 |
| Vino | 0.0000593 | 19 | 1.677 | 0.619 | 0.677 |
| Vino | 0.0000593 | 20 | 1.738 | 0.635 | 0.738 |
| Vino | 0.0000593 | 21 | 1.574 | 0.641 | 0.641 |
| Vino | 0.0000593 | 22 | 1.547 | 0.617 | 0.617 |
| Vino | 0.0000889 | 1  | 1.377 | 0.607 | 0.607 |
| Vino | 0.0000889 | 2  | 1.399 | 0.607 | 0.607 |
| Vino | 0.0000889 | 3  | 1.485 | 0.62  | 0.62  |
| Vino | 0.0000889 | 4  | 1.444 | 0.611 | 0.611 |
| Vino | 0.0000889 | 5  | 1.566 | 0.62  | 0.62  |
| Vino | 0.0000889 | 6  | 1.448 | 0.621 | 0.621 |
| Vino | 0.0000889 | 7  | 1.436 | 0.613 | 0.613 |
| Vino | 0.0000889 | 8  | 1.468 | 0.616 | 0.616 |
| Vino | 0.0000889 | 9  | 1.439 | 0.611 | 0.611 |
| Vino | 0.0000889 | 10 | 1.494 | 0.615 | 0.615 |
| Vino | 0.0000889 | 11 | 1.441 | 0.614 | 0.614 |

|      |           |    |       |       |       |
|------|-----------|----|-------|-------|-------|
| Vino | 0.0000889 | 12 | 1.462 | 0.614 | 0.614 |
| Vino | 0.0000889 | 13 | 1.458 | 0.617 | 0.617 |
| Vino | 0.0000889 | 14 | 1.497 | 0.61  | 0.61  |
| Vino | 0.0000889 | 15 | 1.432 | 0.623 | 0.623 |
| Vino | 0.0000889 | 16 | 1.386 | 0.599 | 0.599 |
| Vino | 0.0000889 | 17 | 1.494 | 0.595 | 0.595 |
| Vino | 0.0000889 | 18 | 1.529 | 0.627 | 0.627 |
| Vino | 0.0000889 | 19 | 1.514 | 0.623 | 0.623 |
| Vino | 0.0000889 | 20 | 1.488 | 0.622 | 0.622 |
| Vino | 0.0000889 | 21 | 1.395 | 0.61  | 0.61  |
| Vino | 0.0000889 | 22 | 1.386 | 0.6   | 0.6   |
| Vino | 0.0001333 | 1  | 1.309 | 0.586 | 0.586 |
| Vino | 0.0001333 | 2  | 1.519 | 0.624 | 0.624 |
| Vino | 0.0001333 | 3  | 1.634 | 0.631 | 0.634 |
| Vino | 0.0001333 | 4  | 1.388 | 0.592 | 0.592 |
| Vino | 0.0001333 | 5  | 1.511 | 0.609 | 0.609 |
| Vino | 0.0001333 | 6  | 1.585 | 0.621 | 0.621 |
| Vino | 0.0001333 | 7  | 1.585 | 0.617 | 0.617 |
| Vino | 0.0001333 | 8  | 1.564 | 0.616 | 0.616 |
| Vino | 0.0001333 | 9  | 1.595 | 0.635 | 0.635 |
| Vino | 0.0001333 | 10 | 1.46  | 0.61  | 0.61  |
| Vino | 0.0001333 | 11 | 1.592 | 0.613 | 0.613 |
| Vino | 0.0001333 | 12 | 1.52  | 0.609 | 0.609 |
| Vino | 0.0001333 | 13 | 1.579 | 0.621 | 0.621 |
| Vino | 0.0001333 | 14 | 1.438 | 0.601 | 0.601 |
| Vino | 0.0001333 | 15 | 1.533 | 0.613 | 0.613 |
| Vino | 0.0001333 | 16 | 1.353 | 0.583 | 0.583 |
| Vino | 0.0001333 | 17 | 1.481 | 0.602 | 0.602 |
| Vino | 0.0001333 | 18 | 1.651 | 0.626 | 0.651 |
| Vino | 0.0001333 | 19 | 1.626 | 0.629 | 0.629 |
| Vino | 0.0001333 | 20 | 1.645 | 0.623 | 0.645 |
| Vino | 0.0001333 | 21 | 1.568 | 0.63  | 0.63  |
| Vino | 0.0001333 | 22 | 1.537 | 0.626 | 0.626 |
| Vino | 0.0002    | 1  | 1.288 | 0.579 | 0.579 |
| Vino | 0.0002    | 2  | 1.359 | 0.598 | 0.598 |
| Vino | 0.0002    | 3  | 1.407 | 0.615 | 0.615 |
| Vino | 0.0002    | 4  | 1.365 | 0.589 | 0.589 |
| Vino | 0.0002    | 5  | 1.465 | 0.605 | 0.605 |
| Vino | 0.0002    | 6  | 1.386 | 0.599 | 0.599 |
| Vino | 0.0002    | 7  | 1.356 | 0.595 | 0.595 |
| Vino | 0.0002    | 8  | 1.401 | 0.595 | 0.595 |
| Vino | 0.0002    | 9  | 1.338 | 0.584 | 0.584 |
| Vino | 0.0002    | 10 | 1.414 | 0.602 | 0.602 |
| Vino | 0.0002    | 11 | 1.38  | 0.604 | 0.604 |
| Vino | 0.0002    | 12 | 1.386 | 0.597 | 0.597 |
| Vino | 0.0002    | 13 | 1.327 | 0.588 | 0.588 |
| Vino | 0.0002    | 14 | 1.427 | 0.602 | 0.602 |
| Vino | 0.0002    | 15 | 1.327 | 0.582 | 0.582 |
| Vino | 0.0002    | 16 | 1.362 | 0.582 | 0.582 |

|      |        |    |       |       |       |
|------|--------|----|-------|-------|-------|
| Vino | 0.0002 | 17 | 1.441 | 0.594 | 0.594 |
| Vino | 0.0002 | 18 | 1.404 | 0.609 | 0.609 |
| Vino | 0.0002 | 19 | 1.414 | 0.625 | 0.625 |
| Vino | 0.0002 | 20 | 1.458 | 0.619 | 0.619 |
| Vino | 0.0002 | 21 | 1.347 | 0.609 | 0.609 |
| Vino | 0.0002 | 22 | 1.27  | 0.585 | 0.585 |
